# Supplementary material for: miR-29a contributes to breast cancer cells epithelial–mesenchymal transition, migration, and invasion via down-regulating histone H4K20 trimethylation through directly targeting SUV420H2
Source: Springer Nature journal article supplement (doi:10.1038/s41419-019-1437-0), 2019-02-21
Supplement: 41419_2019_1437_MOESM6_ESM.pdf [file 41419_2019_1437_MOESM6_ESM.pdf]

Table.S4 Original HTS data sets for mRNAs, lncRNAs and miRNAs

| id              | logFC     | logCPM    | PValue   | FDR      | GeneSymbol    | KO     |
|-----------------|-----------|-----------|----------|----------|---------------|--------|
| ENSG00000120738 | -8.697006 | 5.758244  | 6.56E-17 | 3.79E-12 | EGR1          | K09203 |
| ENSG00000125740 | -6.777072 | 6.596969  | 8.26E-15 | 2.39E-10 | FOSB          | K09029 |
| ENSG00000170345 | -5.936364 | 8.032833  | 3.55E-13 | 6.84E-09 | FOS           | K04379 |
| ENSG00000133247 | 5.807581  | 9.677545  | 4.97E-13 | 7.18E-09 | SUV420H2      | K11429 |
| ENSG00000264063 | 5.841717  | 3.602726  | 9.35E-11 | 1.08E-06 | MIR3687       | -      |
| ENSG00000264462 | 5.326716  | 3.450118  | 7.36E-10 | 7.09E-06 | MIR3648       | -      |
| ENSG00000139318 | -5.600219 | 3.327065  | 3.20E-09 | 2.64E-05 | DUSP6         | K04459 |
| ENSG00000118523 | -4.244039 | 5.235228  | 3.92E-08 | 0.000283 | CTGF          | K06827 |
| ENSG00000259884 | -6.068432 | 2.34902   | 5.46E-08 | 0.000351 | RP11-1100L3.8 | -      |
| ENSG00000177606 | -3.700662 | 7.245693  | 4.30E-07 | 0.002484 | JUN           | K04448 |
| ENSG00000185633 | 3.267867  | 4.582454  | 8.15E-06 | 0.040627 | NDUFA4L2      | K03948 |
| ENSG00000105141 | 3.656326  | 2.563451  | 8.44E-06 | 0.040627 | CASP14        | K04401 |
| ENSG00000172927 | -3.855786 | 2.424798  | 1.36E-05 | 0.060534 | MYEOV         | -      |
| ENSG00000107159 | 3.169387  | 4.123207  | 1.63E-05 | 0.06721  | CA9           | K01672 |
| ENSG00000103888 | 3.792367  | 1.770133  | 1.79E-05 | 0.068799 | KIAA1199      | K19031 |
| ENSG00000169247 | -3.58845  | 1.538828  | 0.000228 | 0.76169  | SH3TC2        | -      |
| ENSG00000143847 | 2.876429  | 2.273319  | 0.000229 | 0.76169  | PPFIA4        | -      |
| ENSG00000136244 | -2.594806 | 5.386732  | 0.000237 | 0.76169  | IL6           | K05405 |
| ENSG00000271334 | -4.437644 | 0.923403  | 0.000278 | 0.763163 | CTD-2078B5.2  | -      |
| ENSG00000111684 | 2.638303  | 3.466878  | 0.000281 | 0.763163 | LPCAT3        | K13515 |
| ENSG00000090539 | 2.628442  | 3.667742  | 0.00029  | 0.763163 | CHRD          | K04657 |
| ENSG00000137411 | 7.525734  | -0.201984 | 0.000291 | 0.763163 | VAR2          | K01873 |
| ENSG00000168398 | 4.176532  | 0.210671  | 0.000385 | 0.967705 | BDKRB2        | K03916 |
| ENSG00000212296 | -7.623848 | 0.430946  | 0.000622 | 1        | SNORD72       | -      |
| ENSG00000183668 | 2.782004  | 1.563753  | 0.00064  | 1        | PSG9          | K06500 |
| ENSG00000135919 | -2.349955 | 5.336969  | 0.000782 | 1        | SERPINE2      | K16643 |
| ENSG00000259001 | -2.39362  | 3.729735  | 0.000983 | 1        | RPPH1         | -      |
| ENSG00000171617 | -3.635757 | 1.077053  | 0.001    | 1        | ENC1          | K10462 |
| ENSG00000104419 | 2.238523  | 9.15477   | 0.00106  | 1        | NDRG1         | K18266 |
| ENSG00000162006 | 2.350925  | 3.135771  | 0.001205 | 1        | MSLNL         | -      |
| ENSG00000147400 | 2.356563  | 3.048054  | 0.00124  | 1        | CETN2         | K10840 |
| ENSG00000130558 | 2.583425  | 1.78425   | 0.00125  | 1        | OLFM1         | -      |
| ENSG00000099998 | -3.174474 | 1.195342  | 0.001348 | 1        | GGT5          | K18592 |
| ENSG00000102221 | -6.975945 | -0.09654  | 0.001409 | 1        | JADE3         | -      |
| ENSG00000185955 | 4.284764  | -0.498289 | 0.001409 | 1        | C7orf61       | -      |
| ENSG00000229869 | 4.284764  | -0.498289 | 0.001409 | 1        | RP11-363N22.2 | -      |
| ENSG00000270141 | 4.284764  | -0.498289 | 0.001409 | 1        | TERC          | -      |
| ENSG00000271855 | 4.284764  | -0.498289 | 0.001409 | 1        | RP11-214N9.1  | -      |
| ENSG00000124102 | -2.866892 | 1.588263  | 0.001545 | 1        | PI3           | -      |
| ENSG00000127528 | -2.395977 | 3.041663  | 0.001624 | 1        | KLF2          | K17845 |
| ENSG00000258486 | 2.191572  | 4.555525  | 0.001657 | 1        | RN7SL1        | -      |
| ENSG00000127129 | 2.346137  | 2.553597  | 0.001661 | 1        | EDN2          | K16367 |
| ENSG00000118160 | 3.837144  | -0.075214 | 0.001744 | 1        | SLC8A2        | K05849 |
| ENSG00000267909 | 3.837144  | -0.075214 | 0.001744 | 1        | CCDC177       | -      |
| ENSG00000165449 | -3.983834 | 0.548515  | 0.001774 | 1        | SLC16A9       | K08186 |
| ENSG00000142871 | -2.12509  | 9.574213  | 0.001806 | 1        | CYR61         | K06829 |
| ENSG00000214049 | 2.574721  | 1.496551  | 0.001831 | 1        | UCA1          | -      |
| ENSG00000111348 | -2.512138 | 2.203     | 0.001909 | 1        | ARHGDI1       | K12462 |
| ENSG00000166866 | -6.906128 | -0.151709 | 0.001996 | 1        | MYO1A         | K10356 |
| ENSG00000267102 | -6.906128 | -0.151709 | 0.001996 | 1        | RP11-686D22.7 | -      |
| ENSG00000148677 | -2.443119 | 2.496856  | 0.002132 | 1        | ANKRD1        | -      |
| ENSG00000248323 | 2.32121   | 2.240121  | 0.002347 | 1        | LUCAT1        | -      |
| ENSG00000119922 | -2.07312  | 7.342721  | 0.002393 | 1        | IFIT2         | -      |
| ENSG00000183604 | -2.360795 | 2.622775  | 0.002637 | 1        | RP11-347C12.2 | K08873 |
| ENSG00000197561 | 3.073855  | 0.1776    | 0.002812 | 1        | ELANE         | K01327 |
| ENSG00000101230 | -6.755461 | -0.26948  | 0.002864 | 1        | ISM1          | -      |

|                 |           |           |          |                 |        |
|-----------------|-----------|-----------|----------|-----------------|--------|
| ENSG00000102271 | -6.755461 | -0.26948  | 0.002864 | 1 KLHL4         | K10442 |
| ENSG00000122877 | -6.755461 | -0.26948  | 0.002864 | 1 EGR2          | K12496 |
| ENSG00000181773 | -2.681576 | 1.67202   | 0.002897 | 1 GPR3          | K04311 |
| ENSG00000168497 | -2.956987 | 1.019106  | 0.00342  | 1 SDPR          | K19387 |
| ENSG00000132938 | 2.524765  | 1.235391  | 0.003561 | 1 MTUS2         | -      |
| ENSG00000272240 | 2.986824  | 0.11002   | 0.003568 | 1 RP5-855D21.1  | -      |
| ENSG00000244405 | -1.999542 | 5.36455   | 0.003709 | 1 ETV5          | K15593 |
| ENSG00000078401 | -2.097854 | 3.4481    | 0.003938 | 1 EDN1          | K16366 |
| ENSG00000105929 | -2.375526 | 1.800058  | 0.004333 | 1 ATP6V0A4      | K02154 |
| ENSG00000137801 | -1.960391 | 5.185914  | 0.004581 | 1 THBS1         | K16857 |
| ENSG00000265749 | -2.897075 | 0.971111  | 0.00475  | 1 RP11-849F2.5  | -      |
| ENSG00000139289 | -1.946287 | 5.278541  | 0.00483  | 1 PHLDA1        | K15696 |
| ENSG00000057149 | 2.014816  | 3.340603  | 0.004912 | 1 SERPINB3      | K13963 |
| ENSG00000081041 | -2.081853 | 3.095187  | 0.005032 | 1 CXCL2         | K05505 |
| ENSG00000200534 | -2.447645 | 1.484869  | 0.005074 | 1 SNORA33       | -      |
| ENSG00000172379 | 1.902223  | 5.761522  | 0.005234 | 1 ARNT2         | K15589 |
| ENSG00000228799 | 3.517172  | -0.326535 | 0.005479 | 1 AC113607.2    | -      |
| ENSG00000165887 | -2.036709 | 3.263776  | 0.005654 | 1 ANKRD2        | -      |
| ENSG00000177685 | 2.52509   | 0.489568  | 0.00576  | 1 EFCAB4A       | K17199 |
| ENSG00000101276 | 2.894204  | 0.039653  | 0.005837 | 1 SLC52A3       | K17985 |
| ENSG00000088827 | 6.625678  | -0.938041 | 0.006149 | 1 SIGLEC1       | K06548 |
| ENSG00000262652 | 6.625678  | -0.938041 | 0.006149 | 1 RP13-638C3.2  | -      |
| ENSG00000099251 | -6.495095 | -0.468486 | 0.006149 | 1 HSD17B7P2     | K13373 |
| ENSG00000198237 | -6.495095 | -0.468486 | 0.006149 | 1 RP11-98J23.2  | K01195 |
| ENSG00000206885 | -6.495095 | -0.468486 | 0.006149 | 1 SNORA75       | -      |
| ENSG00000228323 | -6.495095 | -0.468486 | 0.006149 | 1 AC008753.6    | -      |
| ENSG00000253130 | -6.495095 | -0.468486 | 0.006149 | 1 CTD-3023L14.2 | -      |
| ENSG00000188517 | 3.829323  | -0.831149 | 0.006149 | 1 COL25A1       | K16617 |
| ENSG00000196337 | 3.829323  | -0.831149 | 0.006149 | 1 CGB7          | -      |
| ENSG00000198074 | 3.829323  | -0.831149 | 0.006149 | 1 AKR1B10       | K00011 |
| ENSG00000260139 | 3.829323  | -0.831149 | 0.006149 | 1 CSPG4P13      | K08115 |
| ENSG00000223401 | 2.341458  | 0.835963  | 0.006382 | 1 RP11-211G3.2  | -      |
| ENSG00000216775 | 2.26226   | 1.246239  | 0.006447 | 1 RP1-152L7.5   | -      |
| ENSG00000104043 | 1.907971  | 3.529101  | 0.006583 | 1 ATP8B4        | K01530 |
| ENSG00000170848 | 2.344655  | 1.092615  | 0.006733 | 1 PSG6          | K06500 |
| ENSG00000266651 | -2.162959 | 2.166562  | 0.00675  | 1 RP11-138I1.3  | -      |
| ENSG00000225431 | 1.925387  | 3.111864  | 0.00737  | 1 AP001626.1    | -      |
| ENSG00000259621 | 3.392529  | -0.419302 | 0.007447 | 1 RP11-654A16.1 | -      |
| ENSG00000131018 | -3.611481 | 0.250392  | 0.007531 | 1 SYNE1         | K19326 |
| ENSG00000207445 | -3.611481 | 0.250392  | 0.007531 | 1 SNORD15B      | -      |
| ENSG00000234614 | 3.190993  | -0.092839 | 0.007531 | 1 AL450992.2    | -      |
| ENSG00000187678 | -2.735416 | 0.842862  | 0.007925 | 1 SPRY4         | K17385 |
| ENSG00000107731 | 1.886617  | 3.196417  | 0.008033 | 1 UNC5B         | K07521 |
| ENSG00000231924 | 1.880489  | 3.434867  | 0.00828  | 1 PSG1          | K06500 |
| ENSG00000269399 | 2.28276   | 0.791669  | 0.008737 | 1 CTD-3222D19.7 | -      |
| ENSG00000202314 | -2.427456 | 1.236582  | 0.008776 | 1 SNORD6        | -      |
| ENSG00000143512 | 1.856236  | 3.541112  | 0.008778 | 1 HHIPL2        | -      |
| ENSG00000175832 | -1.790744 | 5.222372  | 0.008987 | 1 ETV4          | K15592 |
| ENSG00000268927 | -6.396701 | -0.542071 | 0.009224 | 1 FLJ00418      | -      |
| ENSG00000272512 | 2.064057  | 1.672039  | 0.00941  | 1 RP11-54O7.17  | -      |
| ENSG00000171522 | -1.845386 | 3.488854  | 0.009698 | 1 PTGER4        | K04261 |
| ENSG00000119917 | -1.745832 | 6.931421  | 0.009767 | 1 IFIT3         | K17985 |
| ENSG00000196409 | -3.501164 | 0.163959  | 0.009775 | 1 ZNF658        | K09228 |
| ENSG00000102575 | 2.688957  | -0.110405 | 0.009775 | 1 ACP5          | K14379 |
| ENSG00000204052 | 2.245399  | 1.016359  | 0.010042 | 1 LRRC73        | -      |
| ENSG00000185745 | -1.735871 | 7.157495  | 0.010135 | 1 IFIT1         | K14217 |
| ENSG00000254772 | 1.803498  | 3.692464  | 0.010201 | 1 EEF1G         | K03233 |
| ENSG00000112511 | 2.590503  | 0.334087  | 0.010331 | 1 PHF1          | K11467 |

|                 |           |           |          |                 |        |
|-----------------|-----------|-----------|----------|-----------------|--------|
| ENSG00000240583 | 2.37374   | 0.377362  | 0.010331 | 1 AQP1          | K09864 |
| ENSG00000173702 | 1.94625   | 1.889519  | 0.010333 | 1 MUC13         | K17298 |
| ENSG00000104081 | 1.84681   | 2.846423  | 0.010345 | 1 BMF           | K17460 |
| ENSG00000204949 | 2.030568  | 1.713235  | 0.010635 | 1 FAM83A-AS1    | -      |
| ENSG00000181143 | 1.748698  | 4.130725  | 0.011175 | 1 MUC16         | K16145 |
| ENSG00000196549 | -2.628943 | 0.75944   | 0.011294 | 1 MME           | K01389 |
| ENSG00000215021 | -2.628943 | 0.75944   | 0.011294 | 1 PHB2          | K17081 |
| ENSG00000175592 | -1.755012 | 4.515068  | 0.011325 | 1 FOSL1         | K04502 |
| ENSG00000214274 | 1.815473  | 2.822484  | 0.011778 | 1 ANG           | -      |
| ENSG00000265150 | 1.75963   | 3.703117  | 0.01196  | 1 RN7SL2        | -      |
| ENSG00000079337 | -1.876778 | 2.82133   | 0.012065 | 1 RAPGEF3       | K08014 |
| ENSG00000178033 | -3.381708 | 0.071438  | 0.012767 | 1 FAM26E        | -      |
| ENSG00000221491 | -3.381708 | 0.071438  | 0.012767 | 1 SNORA34       | -      |
| ENSG00000181634 | -2.005399 | 1.803191  | 0.013893 | 1 TNFSF15       | K05478 |
| ENSG00000110436 | 6.435118  | -1.075553 | 0.014079 | 1 SLC1A2        | K05613 |
| ENSG00000184825 | 6.435118  | -1.075553 | 0.014079 | 1 HIST1H2AH     | K11251 |
| ENSG00000221826 | 6.435118  | -1.075553 | 0.014079 | 1 PSG3          | K06500 |
| ENSG00000248576 | 6.435118  | -1.075553 | 0.014079 | 1 RP11-834C11.8 | -      |
| ENSG00000181333 | -6.291103 | -0.619978 | 0.014079 | 1 HEPHL1        | -      |
| ENSG00000205861 | -6.17716  | -0.702741 | 0.014079 | 1 C1QTNF9B-AS1  | -      |
| ENSG00000228360 | -6.17716  | -0.702741 | 0.014079 | 1 RP11-365F18.1 | K02921 |
| ENSG00000243777 | -6.17716  | -0.702741 | 0.014079 | 1 RP11-864G5.1  | K02991 |
| ENSG00000258424 | -6.17716  | -0.702741 | 0.014079 | 1 RP11-471B22.2 | -      |
| ENSG00000265590 | -6.17716  | -0.702741 | 0.014079 | 1 AP000275.65   | -      |
| ENSG00000112137 | 3.638763  | -0.958503 | 0.014079 | 1 PHACTR1       | -      |
| ENSG00000132357 | 3.638763  | -0.958503 | 0.014079 | 1 CARD6         | K12797 |
| ENSG00000172482 | 3.638763  | -0.958503 | 0.014079 | 1 AGXT          | K00830 |
| ENSG00000199094 | 3.638763  | -0.958503 | 0.014079 | 1 MIR30C2       | -      |
| ENSG00000271267 | 3.638763  | -0.958503 | 0.014079 | 1 RP11-29H23.7  | K02130 |
| ENSG00000135744 | 3.256091  | -0.51742  | 0.014146 | 1 AGT           | K09821 |
| ENSG00000196415 | 2.147427  | 0.82254   | 0.014761 | 1 PRTN3         | K01350 |
| ENSG00000186832 | 1.650935  | 5.489847  | 0.015104 | 1 KRT16         | K07604 |
| ENSG00000166863 | -2.29295  | 1.131813  | 0.015186 | 1 TAC3          | K05240 |
| ENSG00000196407 | 2.138808  | 0.936477  | 0.015186 | 1 THEM5         | -      |
| ENSG00000198794 | 2.138808  | 0.936477  | 0.015186 | 1 SCAMP5        | -      |
| ENSG00000120129 | -1.626859 | 8.517028  | 0.015303 | 1 DUSP1         | K04459 |
| ENSG00000099834 | 2.508425  | 0.27324   | 0.015514 | 1 CDHR5         | K16505 |
| ENSG00000135519 | 2.508425  | 0.27324   | 0.015514 | 1 KCNH3         | K04906 |
| ENSG00000186019 | 2.291662  | 0.318378  | 0.015514 | 1 AC084219.4    | -      |
| ENSG00000105341 | 1.833944  | 2.058738  | 0.015955 | 1 ATP5SL        | -      |
| ENSG00000200087 | -2.037469 | 1.536445  | 0.016233 | 1 SNORA73B      | -      |
| ENSG00000167701 | 1.793445  | 2.360514  | 0.016382 | 1 GPT           | K00814 |
| ENSG00000108018 | 1.951434  | 1.44404   | 0.016397 | 1 SORCS1        | -      |
| ENSG00000260822 | 1.77203   | 2.551949  | 0.016576 | 1 GS1-358P8.4   | -      |
| ENSG00000272256 | -3.318053 | 0.022615  | 0.016783 | 1 RP11-489E7.4  | -      |
| ENSG00000206176 | 2.969997  | -0.256746 | 0.016783 | 1 AC023490.1    | -      |
| ENSG00000143546 | 2.574232  | -0.190662 | 0.016783 | 1 S100A8        | -      |
| ENSG00000269959 | 2.574232  | -0.190662 | 0.016783 | 1 SPACA6P-AS    | -      |
| ENSG00000173237 | 1.628509  | 5.060519  | 0.01681  | 1 C11orf86      | -      |
| ENSG00000039068 | 2.24017   | 0.616352  | 0.01681  | 1 CDH1          | K05689 |
| ENSG00000174332 | 2.24017   | 0.616352  | 0.01681  | 1 GLIS1         | K09232 |
| ENSG00000163293 | -1.811221 | 2.361257  | 0.017284 | 1 NIPAL1        | -      |
| ENSG00000179988 | -2.235428 | 1.08745   | 0.017485 | 1 PSTK          | K10837 |
| ENSG00000142910 | -1.614795 | 5.305006  | 0.017941 | 1 TINAGL1       | -      |
| ENSG00000174374 | -1.994508 | 1.503632  | 0.018081 | 1 WBSCR16       | K16535 |
| ENSG00000185686 | 1.640957  | 3.642271  | 0.018163 | 1 PRAME         | -      |
| ENSG00000128242 | 2.484987  | 0.022663  | 0.018258 | 1 GAL3ST1       | K01019 |
| ENSG00000264577 | -1.707655 | 3.010315  | 0.018294 | 1 AC010761.8    | -      |

|                 |           |           |          |                  |        |
|-----------------|-----------|-----------|----------|------------------|--------|
| ENSG00000206073 | 1.810299  | 1.8945    | 0.01835  | 1 SERPINB4       | K13963 |
| ENSG00000136738 | 1.703005  | 2.682006  | 0.019202 | 1 STAM           | K04705 |
| ENSG00000150995 | 1.567784  | 6.989814  | 0.019566 | 1 ITPR1          | K04958 |
| ENSG00000187608 | -1.561295 | 9.550716  | 0.019606 | 1 ISG15          | K12159 |
| ENSG00000117525 | -1.589812 | 5.121864  | 0.019663 | 1 F3             | K03901 |
| ENSG00000102158 | 1.642802  | 3.493818  | 0.019713 | 1 MAGT1          | K19478 |
| ENSG00000115828 | 3.105388  | -0.621547 | 0.019787 | 1 QPCT           | K00683 |
| ENSG00000172602 | 3.105388  | -0.621547 | 0.019787 | 1 RND1           | K07531 |
| ENSG00000196604 | 3.105388  | -0.621547 | 0.019787 | 1 POTEF          | K17299 |
| ENSG00000227471 | 2.022342  | 0.732391  | 0.020078 | 1 AKR1B15        | K00011 |
| ENSG00000215190 | -2.205784 | 1.064693  | 0.020166 | 1 LINC00680      | -      |
| ENSG00000130477 | -1.691448 | 3.217489  | 0.020193 | 1 UNC13A         | K15293 |
| ENSG00000107554 | 1.563037  | 5.403846  | 0.02092  | 1 DNMBP          | -      |
| ENSG00000187720 | -1.587463 | 4.405372  | 0.021227 | 1 THSD4          | -      |
| ENSG00000117289 | 1.540569  | 7.07241   | 0.021637 | 1 TXNIP          | -      |
| ENSG00000156097 | 6.215502  | -1.225459 | 0.0219   | 1 GPR61          | K08414 |
| ENSG00000226958 | 6.215502  | -1.225459 | 0.0219   | 1 CTD-2328D6.1   | K01979 |
| ENSG00000241781 | 6.215502  | -1.225459 | 0.0219   | 1 AL161626.1     | -      |
| ENSG00000259524 | 6.215502  | -1.225459 | 0.0219   | 1 RP11-461F11.1  | -      |
| ENSG00000271948 | 6.215502  | -1.225459 | 0.0219   | 1 RP11-242F4.2   | -      |
| ENSG00000100298 | -6.05344  | -0.790999 | 0.0219   | 1 APOBEC3H       | K18750 |
| ENSG00000109452 | -6.05344  | -0.790999 | 0.0219   | 1 INPP4B         | K01109 |
| ENSG00000118194 | -6.05344  | -0.790999 | 0.0219   | 1 TNNT2          | K12045 |
| ENSG00000233538 | -6.05344  | -0.790999 | 0.0219   | 1 AC017104.2     | K02927 |
| ENSG00000270332 | -6.05344  | -0.790999 | 0.0219   | 1 RP11-82L2.1    | -      |
| ENSG00000118946 | 3.419147  | -1.096319 | 0.0219   | 1 PCDH17         | K16499 |
| ENSG0000026025  | -1.419147 | -1.096319 | 0.0219   | 1 VIM            | K07606 |
| ENSG00000159307 | 3.419147  | -1.096319 | 0.0219   | 1 SCUBE1         | -      |
| ENSG00000176771 | 3.419147  | -1.096319 | 0.0219   | 1 NCKAP5         | -      |
| ENSG00000234630 | 3.419147  | -1.096319 | 0.0219   | 1 LL22NC03-2H8.4 | -      |
| ENSG00000235523 | 3.419147  | -1.096319 | 0.0219   | 1 RP11-63P12.7   | -      |
| ENSG00000236090 | 3.419147  | -1.096319 | 0.0219   | 1 LDHAP3         | K00016 |
| ENSG00000244480 | 3.419147  | -1.096319 | 0.0219   | 1 AC005154.7     | K17985 |
| ENSG00000260100 | 3.419147  | -1.096319 | 0.0219   | 1 RP11-220I1.5   | -      |
| ENSG00000261227 | 3.419147  | -1.096319 | 0.0219   | 1 AC140912.1     | -      |
| ENSG00000163131 | -1.878556 | 1.706537  | 0.021972 | 1 CTSS           | K01368 |
| ENSG00000172123 | -1.71013  | 2.694692  | 0.022191 | 1 SLFN12         | -      |
| ENSG00000204311 | -3.25146  | -0.028093 | 0.022208 | 1 DFNB59         | -      |
| ENSG00000257303 | -3.25146  | -0.028093 | 0.022208 | 1 RP11-977G19.11 | -      |
| ENSG00000270066 | 2.845355  | -0.344996 | 0.022208 | 1 SCARNA2        | -      |
| ENSG00000172061 | 2.449589  | -0.27485  | 0.022208 | 1 LRRC15         | -      |
| ENSG00000272455 | 1.653159  | 2.398137  | 0.022854 | 1 RP4-758J18.13  | -      |
| ENSG00000004799 | 1.542432  | 5.270717  | 0.022964 | 1 PDK4           | K00898 |
| ENSG00000160471 | 1.919266  | 0.991199  | 0.023091 | 1 COX6B2         | -      |
| ENSG00000135114 | -1.519845 | 8.264306  | 0.023107 | 1 OASL           | K14608 |
| ENSG00000226738 | 2.378716  | -0.05098  | 0.023239 | 1 CTA-384D8.31   | -      |
| ENSG00000169047 | -1.608133 | 3.634296  | 0.023298 | 1 IRS1           | K16172 |
| ENSG00000058091 | -2.769589 | 0.384104  | 0.02363  | 1 CDK14          | K08821 |
| ENSG00000207280 | -2.769589 | 0.384104  | 0.02363  | 1 SNORD20        | -      |
| ENSG00000261220 | 2.328774  | 0.144665  | 0.02363  | 1 RP11-629O1.2   | -      |
| ENSG00000143365 | 1.543529  | 4.241139  | 0.024082 | 1 RORC           | K08534 |
| ENSG0000013441  | 1.511169  | 5.804496  | 0.025001 | 1 CLK1           | K08823 |
| ENSG00000204060 | 1.589255  | 3.157631  | 0.025326 | 1 FOXO6          | K17847 |
| ENSG00000273301 | -1.657906 | 2.595057  | 0.026135 | 1 RP11-314B1.2   | -      |
| ENSG00000124602 | 1.862864  | 0.951401  | 0.026429 | 1 UNC5CL         | -      |
| ENSG00000237649 | 1.752833  | 1.372889  | 0.027504 | 1 KIFC1          | K10405 |
| ENSG00000149609 | 2.937088  | -0.732473 | 0.027969 | 1 C20orf144      | K04613 |
| ENSG00000235774 | 2.937088  | -0.732473 | 0.027969 | 1 AC023347.1     | -      |

|                 |           |           |          |                   |        |
|-----------------|-----------|-----------|----------|-------------------|--------|
| ENSG00000259925 | 2.937088  | -0.732473 | 0.027969 | 1 CTA-363E6.2     | -      |
| ENSG00000169248 | -2.108555 | 0.713311  | 0.028123 | 1 CXCL11          | K12672 |
| ENSG00000138100 | 2.096369  | 0.513414  | 0.028123 | 1 TRIM54          | K10653 |
| ENSG00000170482 | 2.096369  | 0.513414  | 0.028123 | 1 SLC23A1         | K14611 |
| ENSG00000141750 | 1.947015  | 0.551073  | 0.028123 | 1 STAC2           | K17985 |
| ENSG00000107201 | -1.473025 | 6.907786  | 0.028134 | 1 DDX58           | K12646 |
| ENSG00000111859 | -1.483575 | 5.80497   | 0.028147 | 1 NEDD9           | K16832 |
| ENSG00000228950 | 2.103254  | 0.361901  | 0.028744 | 1 AC023137.2      | -      |
| ENSG00000235568 | 2.103254  | 0.361901  | 0.028744 | 1 NFAM1           | -      |
| ENSG00000144802 | -1.506387 | 4.504417  | 0.028773 | 1 NFKBIZ          | K14242 |
| ENSG00000264772 | -1.576177 | 2.912215  | 0.029562 | 1 SNORA67         | -      |
| ENSG00000160182 | -3.181644 | -0.080836 | 0.029588 | 1 TFF1            | -      |
| ENSG00000200913 | -3.108276 | -0.135784 | 0.029588 | 1 SNORD46         | -      |
| ENSG00000070808 | 2.31315   | -0.363371 | 0.029588 | 1 CAMK2A          | K04515 |
| ENSG00000205002 | 2.31315   | -0.363371 | 0.029588 | 1 AARD            | K17985 |
| ENSG00000213222 | 2.31315   | -0.363371 | 0.029588 | 1 AC093724.2      | K11518 |
| ENSG00000000971 | -2.498302 | 0.1787    | 0.029722 | 1 CFH             | K04004 |
| ENSG00000105991 | -2.498302 | 0.1787    | 0.029722 | 1 HOXA1           | K09301 |
| ENSG00000113916 | 1.447216  | 6.442326  | 0.030956 | 1 BCL6            | K15618 |
| ENSG00000224897 | -2.08071  | 0.969491  | 0.031233 | 1 POT1-AS1        | -      |
| ENSG00000165795 | 1.766353  | 1.23404   | 0.031424 | 1 NDRG2           | -      |
| ENSG00000198223 | -1.680717 | 1.904531  | 0.031743 | 1 CSF2RA          | K05066 |
| ENSG00000168333 | 1.532466  | 2.693006  | 0.032386 | 1 C8orf22         | -      |
| ENSG00000066468 | 1.835355  | 1.11769   | 0.032387 | 1 FGFR2           | K05093 |
| ENSG00000273284 | 1.869356  | 0.498627  | 0.03354  | 1 RP11-888D10.4   | -      |
| ENSG00000168685 | -1.431992 | 5.673678  | 0.033926 | 1 IL7R            | K05072 |
| ENSG00000115155 | 1.662865  | 1.310028  | 0.03402  | 1 OTOF            | -      |
| ENSG00000197142 | -1.61591  | 2.365041  | 0.034452 | 1 ACSL5           | K01897 |
| ENSG00000137868 | -1.91636  | 1.075805  | 0.034765 | 1 STRA6           | -      |
| ENSG00000105668 | 5.956345  | -1.390299 | 0.034783 | 1 UPK1A           | K17347 |
| ENSG00000124134 | 5.956345  | -1.390299 | 0.034783 | 1 KCNS1           | K04931 |
| ENSG00000135409 | 5.956345  | -1.390299 | 0.034783 | 1 AMHR2           | K04672 |
| ENSG00000196358 | 5.956345  | -1.390299 | 0.034783 | 1 NTNG2           | K16359 |
| ENSG00000221643 | 5.956345  | -1.390299 | 0.034783 | 1 SNORA77         | -      |
| ENSG00000223692 | 5.956345  | -1.390299 | 0.034783 | 1 DIP2A-IT1       | -      |
| ENSG00000224614 | 5.956345  | -1.390299 | 0.034783 | 1 TNK2-AS1        | -      |
| ENSG00000225556 | 5.956345  | -1.390299 | 0.034783 | 1 C2CD4D          | -      |
| ENSG00000234880 | 5.956345  | -1.390299 | 0.034783 | 1 LINC00163       | -      |
| ENSG00000256282 | 5.956345  | -1.390299 | 0.034783 | 1 RP11-504G3.4    | K17885 |
| ENSG00000259116 | 5.956345  | -1.390299 | 0.034783 | 1 RP11-973N13.4   | -      |
| ENSG00000259635 | 5.956345  | -1.390299 | 0.034783 | 1 AC100830.3      | -      |
| ENSG00000263681 | 5.956345  | -1.390299 | 0.034783 | 1 MIR3197         | -      |
| ENSG00000269937 | 5.956345  | -1.390299 | 0.034783 | 1 RP11-20I23.8    | -      |
| ENSG00000031544 | -5.918107 | -0.885521 | 0.034783 | 1 NR2E3           | -      |
| ENSG00000137434 | -5.918107 | -0.885521 | 0.034783 | 1 C6orf52         | -      |
| ENSG00000137561 | -5.918107 | -0.885521 | 0.034783 | 1 TTPA            | K12756 |
| ENSG00000163082 | -5.918107 | -0.885521 | 0.034783 | 1 SGPP2           | K04717 |
| ENSG00000163347 | -5.918107 | -0.885521 | 0.034783 | 1 CLDN1           | K06087 |
| ENSG00000164199 | -5.918107 | -0.885521 | 0.034783 | 1 GPR98           | K18263 |
| ENSG00000214249 | -5.918107 | -0.885521 | 0.034783 | 1 CTAGE11P        | -      |
| ENSG00000218052 | -5.918107 | -0.885521 | 0.034783 | 1 ADAMTS7P4       | -      |
| ENSG00000234961 | -5.918107 | -0.885521 | 0.034783 | 1 RP11-124N14.3   | -      |
| ENSG00000252061 | -5.918107 | -0.885521 | 0.034783 | 1 RNU6-415P       | -      |
| ENSG00000263011 | -5.918107 | -0.885521 | 0.034783 | 1 RP11-473M20.11  | -      |
| ENSG00000273391 | -5.918107 | -0.885521 | 0.034783 | 1 RP11-634H22.1   | -      |
| ENSG00000076258 | -5.768753 | -0.987252 | 0.034783 | 1 FMO4            | K00485 |
| ENSG00000215349 | -5.768753 | -0.987252 | 0.034783 | 1 MRPL3P1         | K02906 |
| ENSG00000224086 | -5.768753 | -0.987252 | 0.034783 | 1 LL22NC03-86G7.1 | -      |

|                 |           |           |          |                  |        |
|-----------------|-----------|-----------|----------|------------------|--------|
| ENSG00000225213 | -5.768753 | -0.987252 | 0.034783 | 1 RP11-197M22.2  | -      |
| ENSG00000225766 | -5.768753 | -0.987252 | 0.034783 | 1 RP11-468E2.9   | K11147 |
| ENSG00000226645 | -5.768753 | -0.987252 | 0.034783 | 1 AP006216.10    | -      |
| ENSG00000227253 | -5.768753 | -0.987252 | 0.034783 | 1 RP11-166N17.1  | -      |
| ENSG00000230650 | -5.768753 | -0.987252 | 0.034783 | 1 AC112229.1     | -      |
| ENSG00000234076 | -5.768753 | -0.987252 | 0.034783 | 1 TPRG1-AS1      | -      |
| ENSG00000238005 | -5.768753 | -0.987252 | 0.034783 | 1 RP11-443B7.1   | -      |
| ENSG00000248498 | -5.768753 | -0.987252 | 0.034783 | 1 ASN5P1         | K01953 |
| ENSG00000254872 | -5.768753 | -0.987252 | 0.034783 | 1 RP13-870H17.3  | -      |
| ENSG00000255566 | -5.768753 | -0.987252 | 0.034783 | 1 RP11-114F3.5   | K17404 |
| ENSG00000258539 | -5.768753 | -0.987252 | 0.034783 | 1 RP11-12J10.3   | -      |
| ENSG00000260238 | -5.768753 | -0.987252 | 0.034783 | 1 PMF1-BGLAP     | K11546 |
| ENSG00000267174 | -5.768753 | -0.987252 | 0.034783 | 1 CTC-510F12.4   | -      |
| ENSG00000272088 | -5.768753 | -0.987252 | 0.034783 | 1 RP11-168F9.2   | -      |
| ENSG00000086159 | 3.15999   | -1.246527 | 0.034783 | 1 AQP6           | K09868 |
| ENSG00000145861 | 3.15999   | -1.246527 | 0.034783 | 1 C1QTNF2        | K09228 |
| ENSG00000170579 | 3.15999   | -1.246527 | 0.034783 | 1 DLGAP1         | K15008 |
| ENSG00000181322 | 3.15999   | -1.246527 | 0.034783 | 1 NME9           | -      |
| ENSG00000184719 | 3.15999   | -1.246527 | 0.034783 | 1 RNLS           | K18208 |
| ENSG00000228686 | 3.15999   | -1.246527 | 0.034783 | 1 RP11-492I21.1  | -      |
| ENSG00000229178 | 3.15999   | -1.246527 | 0.034783 | 1 AC069513.4     | -      |
| ENSG00000235499 | 3.15999   | -1.246527 | 0.034783 | 1 AC073046.25    | -      |
| ENSG00000239559 | 3.15999   | -1.246527 | 0.034783 | 1 RPL37P2        | K02922 |
| ENSG00000240616 | 3.15999   | -1.246527 | 0.034783 | 1 AD000092.3     | K02991 |
| ENSG00000241563 | 3.15999   | -1.246527 | 0.034783 | 1 CORT           | K05238 |
| ENSG00000243094 | 3.15999   | -1.246527 | 0.034783 | 1 RP11-1084A12.1 | K02912 |
| ENSG00000252874 | 3.15999   | -1.246527 | 0.034783 | 1 Y_RNA          | -      |
| ENSG00000257913 | 3.15999   | -1.246527 | 0.034783 | 1 RP11-386G11.5  | -      |
| ENSG00000270599 | 3.15999   | -1.246527 | 0.034783 | 1 RP11-324O2.6   | -      |
| ENSG00000272343 | 3.15999   | -1.246527 | 0.034783 | 1 RP11-140I16.3  | -      |
| ENSG00000272650 | 3.15999   | -1.246527 | 0.034783 | 1 RP11-571I18.4  | -      |
| ENSG00000131737 | -2.299335 | 0.50689   | 0.034945 | 1 KRT34          | K07604 |
| ENSG00000133321 | -1.495657 | 3.60817   | 0.034984 | 1 RARRES3        | K16817 |
| ENSG00000166046 | 1.602998  | 1.890875  | 0.035292 | 1 TCP11L2        | -      |
| ENSG00000035664 | 1.458472  | 3.791632  | 0.035294 | 1 DAPK2          | K08803 |
| ENSG00000138772 | -1.41337  | 6.415189  | 0.035302 | 1 ANXA3          | K17089 |
| ENSG00000087074 | -1.409769 | 6.199033  | 0.035736 | 1 PPP1R15A       | K14019 |
| ENSG00000265752 | 1.634663  | 1.817782  | 0.036232 | 1 RP11-403A21.1  | -      |
| ENSG00000273445 | 1.683016  | 1.392752  | 0.036519 | 1 RP11-1399P15.1 | -      |
| ENSG0000010219  | 2.229797  | 0.07659   | 0.036521 | 1 DYRK4          | K18669 |
| ENSG00000272849 | 2.013034  | 0.128255  | 0.036521 | 1 RP11-347I19.8  | -      |
| ENSG00000102452 | -1.553444 | 2.517756  | 0.037568 | 1 NALCN          | -      |
| ENSG00000136158 | -1.4144   | 5.002863  | 0.037852 | 1 SPRY2          | K17383 |
| ENSG00000088726 | 1.76447   | 0.978603  | 0.038112 | 1 TMEM40         | -      |
| ENSG00000170298 | -2.437338 | 0.133445  | 0.038199 | 1 LGALS9B        | K10093 |
| ENSG00000184995 | -2.437338 | 0.133445  | 0.038199 | 1 IFNE           | K05442 |
| ENSG00000225177 | -2.437338 | 0.133445  | 0.038199 | 1 RP11-390P2.4   | -      |
| ENSG00000263235 | -2.437338 | 0.133445  | 0.038199 | 1 RP11-461A8.4   | -      |
| ENSG00000272760 | -2.437338 | 0.133445  | 0.038199 | 1 RP11-5C23.1    | -      |
| ENSG00000269165 | 2.263991  | -0.127909 | 0.038199 | 1 AC069547.1     | -      |
| ENSG00000004846 | -3.030976 | -0.193128 | 0.039696 | 1 ABCB5          | K05660 |
| ENSG00000088002 | 2.708916  | -0.438045 | 0.039696 | 1 SULT2B1        | K01015 |
| ENSG00000138606 | 2.708916  | -0.438045 | 0.039696 | 1 SHF            | -      |
| ENSG00000187134 | 2.708916  | -0.438045 | 0.039696 | 1 AKR1C1         | K00089 |
| ENSG00000259881 | 2.708916  | -0.438045 | 0.039696 | 1 RP11-830F9.5   | -      |
| ENSG00000253500 | -1.723051 | 1.715137  | 0.039747 | 1 AF121898.3     | -      |
| ENSG00000223975 | 1.742979  | 0.868905  | 0.039955 | 1 AP001048.4     | -      |
| ENSG00000175899 | 1.936632  | 0.403921  | 0.040094 | 1 A2M            | K03910 |

|                 |           |           |          |                  |        |
|-----------------|-----------|-----------|----------|------------------|--------|
| ENSG00000109738 | -1.759268 | 1.479487  | 0.040452 | 1 GLRB           | K05196 |
| ENSG00000185499 | 1.372421  | 5.617529  | 0.041018 | 1 MUC1           | K06568 |
| ENSG00000137393 | -1.979233 | 0.893245  | 0.042147 | 1 RNF144B        | K11975 |
| ENSG00000170873 | -1.979233 | 0.893245  | 0.042147 | 1 MTSS1          | -      |
| ENSG00000173432 | -1.979233 | 0.893245  | 0.042147 | 1 SAA1           | K17310 |
| ENSG00000134061 | 1.530768  | 2.169576  | 0.042185 | 1 CD180          | K06555 |
| ENSG00000224321 | -2.203656 | 0.435314  | 0.042606 | 1 RP11-169K16.6  | K02870 |
| ENSG00000095539 | 1.923603  | 0.241389  | 0.042606 | 1 SEMA4G         | K06521 |
| ENSG00000124243 | 1.923603  | 0.241389  | 0.042606 | 1 BCAS4          | K03685 |
| ENSG00000239653 | 1.923603  | 0.241389  | 0.042606 | 1 PSMD6-AS2      | -      |
| ENSG00000115194 | 1.705772  | 0.938641  | 0.043422 | 1 SLC30A3        | K14690 |
| ENSG00000137752 | -1.397771 | 3.94732   | 0.044496 | 1 CASP1          | K01370 |
| ENSG00000104894 | 1.811682  | 0.587597  | 0.044792 | 1 CD37           | K06475 |
| ENSG00000169994 | 1.811682  | 0.587597  | 0.044792 | 1 MYO7B          | K10359 |
| ENSG00000119900 | -1.351139 | 5.535768  | 0.045165 | 1 OGFRL1         | K17985 |
| ENSG00000005102 | 1.356884  | 4.785271  | 0.045201 | 1 MEOX1          | K09322 |
| ENSG00000185133 | 1.38801   | 3.820727  | 0.045285 | 1 INPP5J         | K01106 |
| ENSG00000130821 | 2.123527  | 0.005722  | 0.045652 | 1 SLC6A8         | K05039 |
| ENSG00000272983 | 2.123527  | 0.005722  | 0.045652 | 1 RP11-508N22.12 | -      |
| ENSG00000137101 | 1.906764  | 0.05994   | 0.045652 | 1 CD72           | K06504 |
| ENSG00000231412 | 1.48162   | 1.895812  | 0.04596  | 1 CTC-490G23.2   | -      |
| ENSG00000273151 | 1.679081  | 0.826119  | 0.045981 | 1 RP11-449P15.2  | -      |
| ENSG00000134013 | 1.325682  | 7.48902   | 0.046595 | 1 LOXL2          | K00280 |
| ENSG00000114268 | 1.359875  | 4.09032   | 0.047102 | 1 PFKFB4         | K19030 |
| ENSG00000202198 | 1.34918   | 4.651359  | 0.047506 | 1 RN7SK          | -      |
| ENSG00000106025 | -1.374024 | 4.107733  | 0.047514 | 1 TSPAN12        | K17355 |
| ENSG00000237330 | 1.50588   | 1.823183  | 0.047648 | 1 RNF223         | K08857 |
| ENSG00000011347 | 1.350298  | 4.456313  | 0.04795  | 1 SYT7           | -      |
| ENSG00000188211 | -1.939468 | 0.587885  | 0.048037 | 1 NCR3LG1        | K16349 |
| ENSG00000251169 | -1.939468 | 0.587885  | 0.048037 | 1 AC005355.2     | -      |
| ENSG00000186862 | 1.399292  | 2.921386  | 0.048403 | 1 PDZD7          | -      |
| ENSG00000157368 | -2.30709  | 0.037949  | 0.049336 | 1 IL34           | -      |
| ENSG00000159167 | 2.139349  | -0.208426 | 0.049336 | 1 STC1           | -      |
| ENSG00000238198 | 2.139349  | -0.208426 | 0.049336 | 1 RP11-31F15.2   | -      |
| ENSG00000246089 | -1.556178 | 2.08976   | 0.049338 | 1 RP11-115C21.2  | -      |
| ENSG00000140795 | 1.441039  | 2.143492  | 0.050732 | 1 MYLK3          | K00907 |
| ENSG00000115594 | 1.35131   | 3.501766  | 0.051637 | 1 IL1R1          | K04386 |
| ENSG00000115267 | -1.315725 | 5.076924  | 0.052047 | 1 IFIH1          | K12647 |
| ENSG00000085741 | 1.585781  | 1.031228  | 0.052818 | 1 WNT11          | -      |
| ENSG00000066923 | 1.734023  | 0.5365    | 0.052888 | 1 STAG3          | K13055 |
| ENSG00000144230 | 1.734023  | 0.5365    | 0.052888 | 1 GPR17          | K08404 |
| ENSG00000187550 | 1.734023  | 0.5365    | 0.052888 | 1 SBK2           | K08858 |
| ENSG00000230154 | -2.949299 | -0.253087 | 0.053633 | 1 AC018463.4     | -      |
| ENSG00000240038 | 2.558214  | -0.536447 | 0.053633 | 1 AMY2B          | K01176 |
| ENSG00000270705 | 2.558214  | -0.536447 | 0.053633 | 1 RP11-736N17.9  | -      |
| ENSG00000017373 | 2.162448  | -0.456693 | 0.053633 | 1 SRCIN1         | -      |
| ENSG00000136457 | 2.162448  | -0.456693 | 0.053633 | 1 CHAD           | K06248 |
| ENSG00000147127 | 2.162448  | -0.456693 | 0.053633 | 1 RAB41          | K07896 |
| ENSG00000250548 | 2.162448  | -0.456693 | 0.053633 | 1 RP11-47I22.2   | -      |
| ENSG00000257279 | 2.162448  | -0.456693 | 0.053633 | 1 RP11-23I116.1  | -      |
| ENSG00000168079 | 1.336011  | 3.827507  | 0.053756 | 1 SCARA5         | -      |
| ENSG00000171368 | 1.325377  | 3.830721  | 0.053756 | 1 TPPP           | K18932 |
| ENSG00000174343 | 1.35482   | 2.951035  | 0.05388  | 1 CHRNA9         | K04810 |
| ENSG00000251495 | 1.54587   | 1.298941  | 0.055216 | 1 PPIAP11        | K03767 |
| ENSG00000084636 | -1.33845  | 3.749719  | 0.056136 | 1 COL16A1        | -      |
| ENSG00000159399 | 1.269774  | 7.460273  | 0.056338 | 1 HK2            | K00844 |
| ENSG00000123342 | -5.602132 | -1.097364 | 0.056522 | 1 MMP19          | K07998 |
| ENSG00000128872 | -5.602132 | -1.097364 | 0.056522 | 1 TMOD2          | K10370 |

|                 |           |           |          |                  |              |
|-----------------|-----------|-----------|----------|------------------|--------------|
| ENSG00000162461 | -5.602132 | -1.097364 | 0.056522 | 1 SLC25A34       | K15117       |
| ENSG00000171560 | -5.602132 | -1.097364 | 0.056522 | 1 FGA            | K03903       |
| ENSG00000189143 | -5.602132 | -1.097364 | 0.056522 | 1 CLDN4          | K11835       |
| ENSG00000225871 | -5.602132 | -1.097364 | 0.056522 | 1 RP11-495P10.10 | -            |
| ENSG00000227220 | -5.602132 | -1.097364 | 0.056522 | 1 RP11-69I8.3    | -            |
| ENSG00000228021 | -5.602132 | -1.097364 | 0.056522 | 1 RP11-383C5.3   | -            |
| ENSG00000232486 | -5.602132 | -1.097364 | 0.056522 | 1 RP11-18B3.2    | -            |
| ENSG00000232615 | -5.602132 | -1.097364 | 0.056522 | 1 CTD-2012J19.1  | K15425       |
| ENSG00000242147 | -5.602132 | -1.097364 | 0.056522 | 1 RP13-463N16.6  | -            |
| ENSG00000259212 | -5.602132 | -1.097364 | 0.056522 | 1 CTD-3065B20.2  | -            |
| ENSG00000270084 | -5.602132 | -1.097364 | 0.056522 | 1 GAS5-AS1       | -            |
| ENSG00000272379 | -5.602132 | -1.097364 | 0.056522 | 1 RP1-257A7.5    | -            |
| ENSG00000272576 | -5.602132 | -1.097364 | 0.056522 | 1 RP11-365H22.2  | -            |
| ENSG00000272841 | -5.602132 | -1.097364 | 0.056522 | 1 RP3-428L16.2   | -            |
| ENSG00000272216 | 1.644585  | 0.897725  | 0.056561 | 1 LL22NC03-2H8.5 | -            |
| ENSG00000249087 | 1.517997  | 1.52572   | 0.056867 | 1 C1orf213       | -            |
| ENSG00000261087 | 1.460319  | 1.837306  | 0.057268 | 1 KB-1460A1.5    | -            |
| ENSG00000125266 | 1.792039  | -0.011168 | 0.057273 | 1 EFN2           | K05463       |
| ENSG00000127084 | 1.792039  | -0.011168 | 0.057273 | 1 FGD3           | K05722       |
| ENSG00000164061 | 1.792039  | -0.011168 | 0.057273 | 1 BSN            | -            |
| ENSG00000167772 | 1.283187  | 4.906567  | 0.057368 | 1 ANGPTL4        | K08767       |
| ENSG00000116117 | -1.893908 | 0.554546  | 0.057683 | 1 PARD3B         | -            |
| ENSG00000141540 | 1.526456  | 1.35121   | 0.057716 | 1 TTYH2          | -            |
| ENSG00000136425 | 2.746528  | -0.851163 | 0.057771 | 1 CIB2           | -            |
| ENSG00000205710 | 2.746528  | -0.851163 | 0.057771 | 1 C17orf107      | K04817       |
| ENSG00000260923 | 2.746528  | -0.851163 | 0.057771 | 1 AC137934.1     | -            |
| ENSG00000265996 | 2.746528  | -0.851163 | 0.057771 | 1 MIR3671        | -            |
| ENSG00000260563 | 1.358746  | 2.933825  | 0.057938 | 1 RP13-516M14.1  | -            |
| ENSG0000009950  | 1.589798  | 1.18843   | 0.058699 | 1 MLXIPL         | K09113       |
| ENSG00000260317 | 1.516431  | 1.211115  | 0.058699 | 1 RP11-48B3.4    | -            |
| ENSG00000260942 | 1.448229  | 1.587672  | 0.058988 | 1 CAPN10-AS1     | -            |
| ENSG00000164638 | 1.346485  | 2.905113  | 0.059252 | 1 SLC29A4        | K03323       |
| ENSG00000182319 | -1.356709 | 3.231093  | 0.059644 | 1 SGK223         | K17537       |
| ENSG00000215196 | 1.290254  | 4.195585  | 0.05982  | 1 AC091878.1     | -            |
| ENSG00000136653 | 1.527083  | 0.992746  | 0.059836 | 1 RASSF5         | K08015       |
| ENSG00000174473 | 1.71782   | 0.750838  | 0.061138 | 1 GALNTL6        | K00710       |
| ENSG00000258279 | 1.612221  | 0.782244  | 0.061138 | 1 LINC00592      | -            |
| ENSG00000164056 | -1.353328 | 2.652331  | 0.062452 | 1 SPRY1          | K04704       |
| ENSG00000186897 | 1.378124  | 2.135929  | 0.062548 | 1 C1QL4          | -            |
| ENSG00000101198 | 1.787278  | 0.444541  | 0.062562 | 1 NKAIN4         | -            |
| ENSG00000116690 | 1.787278  | 0.444541  | 0.062562 | 1 PRG4           | K09291       |
| ENSG00000166589 | 1.787278  | 0.444541  | 0.062562 | 1 CDH16          | K06810       |
| ENSG00000234678 | 1.787278  | 0.444541  | 0.062562 | 1 RP11-465N4.4   | -            |
| ENSG00000185669 | 1.651945  | 0.483852  | 0.062562 | 1 SNAI3          | K09217       |
| ENSG00000104899 | 1.263274  | 4.590839  | 0.063027 | 1 AMH            | K04665       |
| ENSG00000163485 | -2.101179 | 0.359582  | 0.063872 | 1 ADORA1         | K04265       |
| ENSG00000144583 | -2.047075 | 0.319999  | 0.063872 | 1                | 4-Mar K10659 |
| ENSG00000197415 | -2.047075 | 0.319999  | 0.063872 | 1 VEPH1          | -            |
| ENSG00000104760 | 1.824626  | 0.17784   | 0.063872 | 1 FGL1           | -            |
| ENSG00000132130 | 1.824626  | 0.17784   | 0.063872 | 1 LHX1           | -            |
| ENSG00000233974 | 1.824626  | 0.17784   | 0.063872 | 1 RP11-823P9.3   | -            |
| ENSG00000234353 | 1.824626  | 0.17784   | 0.063872 | 1 AP000347.4     | K06554       |
| ENSG00000116032 | -2.237274 | -0.012548 | 0.06403  | 1 GRIN3B         | K05214       |
| ENSG00000255423 | -2.237274 | -0.012548 | 0.06403  | 1 EBLN2          | -            |
| ENSG00000263551 | -2.163906 | -0.065072 | 0.06403  | 1 RP11-78F17.1   | -            |
| ENSG00000161958 | 2.00291   | -0.292876 | 0.06403  | 1 FGF11          | K04358       |
| ENSG00000146674 | 1.230584  | 7.035789  | 0.064413 | 1 IGFBP3         | K10138       |
| ENSG00000113083 | 1.226197  | 7.343302  | 0.065143 | 1 LOX            | K00277       |



|                 |           |           |          |                   |        |
|-----------------|-----------|-----------|----------|-------------------|--------|
| ENSG00000159314 | 1.464119  | 1.176821  | 0.065616 | 1 ARHGAP27        | -      |
| ENSG00000247903 | -1.305439 | 3.414012  | 0.066029 | 1 RP11-421F16.3   | -      |
| ENSG00000168298 | 1.508486  | 1.40167   | 0.066082 | 1 HIST1H1E        | K11275 |
| ENSG00000022267 | 1.447522  | 1.420998  | 0.066082 | 1 FHL1            | K14365 |
| ENSG00000267480 | 1.447522  | 1.420998  | 0.066082 | 1 RP11-703I16.1   | -      |
| ENSG00000167992 | 1.43552   | 1.630686  | 0.066313 | 1 VWCE            | -      |
| ENSG00000264991 | -1.831771 | 0.784112  | 0.066846 | 1 AP001205.1      | -      |
| ENSG00000248015 | 1.687962  | 0.623053  | 0.066846 | 1 AC005329.7      | -      |
| ENSG00000153140 | -1.250927 | 4.436207  | 0.067098 | 1 CETN3           | K16466 |
| ENSG00000140854 | -1.342599 | 2.878099  | 0.067138 | 1 KATNB1          | K18643 |
| ENSG00000163993 | 1.210131  | 7.908954  | 0.068361 | 1 S100P           | -      |
| ENSG00000119938 | 1.214901  | 6.34361   | 0.068649 | 1 PPP1R3C         | K07189 |
| ENSG00000006704 | 1.333508  | 2.331947  | 0.068833 | 1 GTF2IRD1        | K03121 |
| ENSG00000124216 | -0.972539 | 3.957933  | 0.069137 | 1 SNAI1           | K05707 |
| ENSG00000232759 | -1.846861 | 0.520329  | 0.069419 | 1 AC002480.3      | -      |
| ENSG00000146376 | -1.322793 | 2.947629  | 0.069562 | 1 ARHGAP18        | -      |
| ENSG00000130234 | -1.452212 | 1.836012  | 0.069913 | 1 ACE2            | K09708 |
| ENSG00000128482 | -1.684599 | 0.905107  | 0.070633 | 1 RNF112          | -      |
| ENSG00000246898 | -1.684599 | 0.905107  | 0.070633 | 1 LINC00920       | -      |
| ENSG00000267745 | -1.684599 | 0.905107  | 0.070633 | 1 RP11-686D22.8   | -      |
| ENSG00000214856 | 1.647711  | 0.7048    | 0.070633 | 1 KRT16P1         | K07604 |
| ENSG00000173531 | 1.542112  | 0.737225  | 0.070633 | 1 MST1            | -      |
| ENSG00000228873 | 1.542112  | 0.737225  | 0.070633 | 1 AC012307.2      | -      |
| ENSG00000271918 | 1.542112  | 0.737225  | 0.070633 | 1 CTD-2287O16.5   | -      |
| ENSG00000272145 | 1.504104  | 1.056704  | 0.070754 | 1 NFYC-AS1        | -      |
| ENSG00000272994 | -1.408501 | 2.064127  | 0.071084 | 1 RP11-332H14.2   | -      |
| ENSG00000129521 | 1.229951  | 4.35086   | 0.071304 | 1 EGLN3           | K09592 |
| ENSG00000138646 | -1.200224 | 6.540482  | 0.071709 | 1 HERC5           | -      |
| ENSG00000232070 | 2.008802  | -0.06817  | 0.072109 | 1 TMEM253         | -      |
| ENSG00000233122 | 2.008802  | -0.06817  | 0.072109 | 1 CTAGE7P         | -      |
| ENSG00000270109 | 2.008802  | -0.06817  | 0.072109 | 1 RP11-393M11.2   | -      |
| ENSG00000175155 | 1.39608   | 1.604479  | 0.072121 | 1 YPEL2           | -      |
| ENSG00000120885 | 1.19037   | 9.453988  | 0.072468 | 1 CLU             | K17252 |
| ENSG00000005486 | 1.341674  | 2.002663  | 0.072494 | 1 RHBDD2          | K09652 |
| ENSG00000120875 | -1.199938 | 5.855855  | 0.07282  | 1 DUSP4           | K04459 |
| ENSG00000152292 | 1.239341  | 3.589968  | 0.07284  | 1 SH2D6           | -      |
| ENSG00000227292 | -2.77061  | -0.381879 | 0.072973 | 1 AC009229.5      | -      |
| ENSG00000259332 | -2.77061  | -0.381879 | 0.072973 | 1 ST20-MTHFS      | K01934 |
| ENSG00000101188 | 2.389913  | -0.640856 | 0.072973 | 1 NTSR1           | K04211 |
| ENSG00000101210 | 2.389913  | -0.640856 | 0.072973 | 1 EEF1A2          | K03231 |
| ENSG00000129910 | 2.389913  | -0.640856 | 0.072973 | 1 CDH15           | K06809 |
| ENSG00000178404 | 2.389913  | -0.640856 | 0.072973 | 1 DDC8            | -      |
| ENSG00000184471 | 2.389913  | -0.640856 | 0.072973 | 1 C1QTNF8         | K19470 |
| ENSG00000224388 | 2.389913  | -0.640856 | 0.072973 | 1 BACE2-IT1       | -      |
| ENSG00000226318 | 2.389913  | -0.640856 | 0.072973 | 1 RP11-474D14.2   | K02984 |
| ENSG00000230189 | 2.389913  | -0.640856 | 0.072973 | 1 GS1-124K5.2     | K03121 |
| ENSG00000232712 | 2.389913  | -0.640856 | 0.072973 | 1 RP4-777D9.2     | -      |
| ENSG00000234636 | 2.389913  | -0.640856 | 0.072973 | 1 MED14-AS1       | -      |
| ENSG00000260710 | 2.389913  | -0.640856 | 0.072973 | 1 RP11-616M22.7   | -      |
| ENSG00000260936 | 2.389913  | -0.640856 | 0.072973 | 1 FTO-IT1         | -      |
| ENSG00000273402 | 2.389913  | -0.640856 | 0.072973 | 1 RP5-855D21.2    | -      |
| ENSG00000112559 | 1.994147  | -0.555366 | 0.072973 | 1 MDFI            | -      |
| ENSG00000161939 | 1.994147  | -0.555366 | 0.072973 | 1 RNASEK-C17orf49 | K19770 |
| ENSG00000176723 | 1.994147  | -0.555366 | 0.072973 | 1 ZNF843          | K17985 |
| ENSG00000227006 | 1.994147  | -0.555366 | 0.072973 | 1 RP5-956O18.2    | -      |
| ENSG00000236194 | 1.994147  | -0.555366 | 0.072973 | 1 AC003104.1      | -      |
| ENSG00000040731 | 1.188254  | 7.077362  | 0.073852 | 1 CDH10           | K06802 |
| ENSG00000105939 | -1.179432 | 7.859229  | 0.07565  | 1 ZC3HAV1         | K15259 |

|                 |           |           |          |                   |        |
|-----------------|-----------|-----------|----------|-------------------|--------|
| ENSG00000254780 | -1.563906 | 1.336146  | 0.075828 | 1 RP11-793I11.1   | K09481 |
| ENSG00000259863 | 1.446614  | 1.233381  | 0.075828 | 1 SH3RF3-AS1      | -      |
| ENSG00000232320 | 1.356699  | 1.935492  | 0.076042 | 1 AC009299.5      | -      |
| ENSG00000178107 | 1.365959  | 1.53334   | 0.076689 | 1 RP11-998D10.4   | -      |
| ENSG00000113790 | -1.634237 | 1.063957  | 0.077014 | 1 EHHADH          | K07514 |
| ENSG00000164342 | -1.634237 | 1.063957  | 0.077014 | 1 TLR3            | K05401 |
| ENSG00000167676 | 1.552476  | 0.925874  | 0.077014 | 1 PLIN4           | -      |
| ENSG00000174482 | 1.465896  | 0.953382  | 0.077014 | 1 LINGO2          | -      |
| ENSG00000175886 | 1.465896  | 0.953382  | 0.077014 | 1 RPL7AP66        | K02936 |
| ENSG00000176383 | 1.465896  | 0.953382  | 0.077014 | 1 B3GNT4          | K07971 |
| ENSG00000171984 | -1.751974 | 0.72591   | 0.078188 | 1 C20orf196       | K11847 |
| ENSG00000108823 | 1.718356  | 0.111884  | 0.078524 | 1 SGCA            | K12565 |
| ENSG00000112139 | 1.718356  | 0.111884  | 0.078524 | 1 MDGA1           | -      |
| ENSG00000164684 | -1.216141 | 3.995834  | 0.078939 | 1 ZNF704          | K12795 |
| ENSG00000182463 | 1.207786  | 3.749344  | 0.079206 | 1 TSHZ2           | K09236 |
| ENSG00000138356 | -1.242547 | 3.279694  | 0.079387 | 1 AOX1            | K00157 |
| ENSG00000101977 | -1.38285  | 1.964498  | 0.080032 | 1 MCF2            | -      |
| ENSG00000143320 | 1.336559  | 1.663016  | 0.080134 | 1 CRABP2          | K17289 |
| ENSG00000135678 | 1.16156   | 6.997744  | 0.080469 | 1 CPM             | K01296 |
| ENSG00000165272 | 1.156182  | 8.523291  | 0.081037 | 1 AQP3            | K09876 |
| ENSG00000136826 | -1.161256 | 6.651521  | 0.081153 | 1 KLF4            | K17846 |
| ENSG00000143641 | 1.154718  | 8.753367  | 0.08135  | 1 GALNT2          | K00710 |
| ENSG00000128262 | -1.610917 | 0.85192   | 0.081703 | 1 POM121L9P       | K08878 |
| ENSG00000134569 | 1.468421  | 0.691007  | 0.081703 | 1 LRP4            | K03068 |
| ENSG00000138685 | -1.157584 | 7.059718  | 0.081709 | 1 FGF2            | K18497 |
| ENSG00000162366 | 1.273374  | 2.513037  | 0.082288 | 1 PDZK1IP1        | -      |
| ENSG00000137699 | 1.148708  | 7.616227  | 0.083354 | 1 TRIM29          | K12010 |
| ENSG00000125122 | -2.086606 | -0.119794 | 0.083497 | 1 LRRC29          | K10275 |
| ENSG00000178919 | -2.086606 | -0.119794 | 0.083497 | 1 FOXE1           | K09398 |
| ENSG00000237836 | -2.086606 | -0.119794 | 0.083497 | 1 PHKA2-AS1       | -      |
| ENSG00000240204 | -2.086606 | -0.119794 | 0.083497 | 1 SMKR1           | -      |
| ENSG00000256690 | -2.086606 | -0.119794 | 0.083497 | 1 RP11-727F15.9   | -      |
| ENSG00000106477 | -1.7479   | 0.449069  | 0.08372  | 1 CEP41           | K16455 |
| ENSG00000174721 | -1.414424 | 1.604809  | 0.083771 | 1 FGF3BP3         | -      |
| ENSG00000269772 | 1.322995  | 1.505501  | 0.083771 | 1 RP11-178G16.5   | -      |
| ENSG00000093100 | 2.526912  | -0.978809 | 0.084472 | 1 XXbac-B461K10.4 | -      |
| ENSG00000105383 | 2.526912  | -0.978809 | 0.084472 | 1 CD33            | K06473 |
| ENSG00000110169 | 2.526912  | -0.978809 | 0.084472 | 1 HPX             | K18977 |
| ENSG00000136206 | 2.526912  | -0.978809 | 0.084472 | 1 SPDYE1          | K08694 |
| ENSG00000144130 | 2.526912  | -0.978809 | 0.084472 | 1 NT5DC4          | K01081 |
| ENSG00000158815 | 2.526912  | -0.978809 | 0.084472 | 1 FGF17           | K04358 |
| ENSG00000183562 | 2.526912  | -0.978809 | 0.084472 | 1 AC131971.1      | -      |
| ENSG00000219607 | 2.526912  | -0.978809 | 0.084472 | 1 PPP1R3G         | -      |
| ENSG00000225125 | 2.526912  | -0.978809 | 0.084472 | 1 RANP4           | K07936 |
| ENSG00000225975 | 2.526912  | -0.978809 | 0.084472 | 1 AC074138.3      | -      |
| ENSG00000231010 | 2.526912  | -0.978809 | 0.084472 | 1 RP6-109B7.2     | -      |
| ENSG00000235237 | 2.526912  | -0.978809 | 0.084472 | 1 RP1-151B14.6    | -      |
| ENSG00000238184 | 2.526912  | -0.978809 | 0.084472 | 1 CD81-AS1        | -      |
| ENSG00000248968 | 2.526912  | -0.978809 | 0.084472 | 1 CTD-2256P15.1   | -      |
| ENSG00000258927 | 2.526912  | -0.978809 | 0.084472 | 1 RP11-1070N10.5  | -      |
| ENSG00000263624 | 2.526912  | -0.978809 | 0.084472 | 1 RP11-45M22.3    | -      |
| ENSG00000267277 | 2.526912  | -0.978809 | 0.084472 | 1 CTD-2342J14.6   | -      |
| ENSG00000269242 | 2.526912  | -0.978809 | 0.084472 | 1 CTD-2192J16.22  | K12311 |
| ENSG00000272574 | 2.526912  | -0.978809 | 0.084472 | 1 RP11-359K18.4   | -      |
| ENSG00000106258 | 1.513828  | 0.812856  | 0.084778 | 1 CYP3A5          | K17690 |
| ENSG00000213937 | 1.513828  | 0.812856  | 0.084778 | 1 CLDN9           | K06087 |
| ENSG00000110092 | -1.144352 | 7.124054  | 0.085106 | 1 CCND1           | K04503 |
| ENSG00000188505 | 1.219796  | 3.144811  | 0.085112 | 1 NCCRP1          | K12606 |

|                 |           |           |          |                  |        |
|-----------------|-----------|-----------|----------|------------------|--------|
| ENSG00000132623 | -1.229964 | 3.107141  | 0.085616 | 1 ANKEF1         | -      |
| ENSG00000182379 | 1.163401  | 4.622046  | 0.086415 | 1 NXPH4          | K16656 |
| ENSG00000167656 | 1.297119  | 1.63741   | 0.086932 | 1 LY6D           | K06846 |
| ENSG00000142156 | 1.207235  | 3.120025  | 0.087237 | 1 COL6A1         | K06238 |
| ENSG00000269929 | 1.700247  | 0.388717  | 0.088001 | 1 RP11-2B6.2     | -      |
| ENSG00000161249 | 1.564914  | 0.429563  | 0.088001 | 1 DMKN           | -      |
| ENSG00000183657 | 1.564914  | 0.429563  | 0.088001 | 1 PP13439        | -      |
| ENSG00000184828 | 1.564914  | 0.429563  | 0.088001 | 1 ZBTB7C         | K10494 |
| ENSG00000228393 | 1.354658  | 1.360525  | 0.088271 | 1 LINC01004      | -      |
| ENSG00000156515 | 1.156621  | 4.498895  | 0.088846 | 1 HK1            | K00844 |
| ENSG00000150456 | -1.266747 | 2.31172   | 0.089023 | 1 N6AMT2         | -      |
| ENSG00000232442 | 1.179031  | 3.241625  | 0.090151 | 1 CTD-3184A7.4   | -      |
| ENSG00000186073 | -1.237147 | 2.570237  | 0.090293 | 1 C15orf41       | K09513 |
| ENSG00000121900 | 1.884159  | -0.14535  | 0.091098 | 1 TMEM54         | -      |
| ENSG00000197459 | 1.884159  | -0.14535  | 0.091098 | 1 HIST1H2BH      | K11252 |
| ENSG00000215458 | 1.884159  | -0.14535  | 0.091098 | 1 AP001053.11    | -      |
| ENSG00000259856 | 1.528225  | 0.521938  | 0.091583 | 1 RAB43P1        | K07930 |
| ENSG00000268785 | 1.528225  | 0.521938  | 0.091583 | 1 RPL7P50        | K02937 |
| ENSG00000064195 | 1.133998  | 4.803491  | 0.092678 | 1 DLX3           | K09315 |
| ENSG00000223960 | -1.279753 | 2.257755  | 0.093229 | 1 AC009948.5     | -      |
| ENSG00000005243 | 5.640214  | -1.573505 | 0.094203 | 1 COPZ2          | -      |
| ENSG00000068831 | 5.640214  | -1.573505 | 0.094203 | 1 RASGRP2        | K12361 |
| ENSG00000110799 | 5.640214  | -1.573505 | 0.094203 | 1 VWF            | K03900 |
| ENSG00000129988 | 5.640214  | -1.573505 | 0.094203 | 1 LBP            | K05399 |
| ENSG00000159337 | 5.640214  | -1.573505 | 0.094203 | 1 PLA2G4D        | K16342 |
| ENSG00000161267 | 5.640214  | -1.573505 | 0.094203 | 1 BDH1           | K00019 |
| ENSG00000177791 | 5.640214  | -1.573505 | 0.094203 | 1 MYOZ1          | -      |
| ENSG00000180155 | 5.640214  | -1.573505 | 0.094203 | 1 LYNX1          | -      |
| ENSG00000185792 | 5.640214  | -1.573505 | 0.094203 | 1 NLRP9          | -      |
| ENSG00000189409 | 5.640214  | -1.573505 | 0.094203 | 1 MMP23B         | K08001 |
| ENSG00000196811 | 5.640214  | -1.573505 | 0.094203 | 1 CHRNG          | K04818 |
| ENSG00000201820 | 5.640214  | -1.573505 | 0.094203 | 1 Y_RNA          | -      |
| ENSG00000203258 | 5.640214  | -1.573505 | 0.094203 | 1 RP11-47J17.2   | -      |
| ENSG00000204894 | 5.640214  | -1.573505 | 0.094203 | 1 RP11-208G20.2  | K01079 |
| ENSG00000205106 | 5.640214  | -1.573505 | 0.094203 | 1 CTD-2210P24.4  | -      |
| ENSG00000217624 | 5.640214  | -1.573505 | 0.094203 | 1 RP11-204C16.4  | K16197 |
| ENSG00000223356 | 5.640214  | -1.573505 | 0.094203 | 1 RP11-66D17.5   | -      |
| ENSG00000223416 | 5.640214  | -1.573505 | 0.094203 | 1 RPS26P15       | K02976 |
| ENSG00000223466 | 5.640214  | -1.573505 | 0.094203 | 1 AC064834.2     | -      |
| ENSG00000224005 | 5.640214  | -1.573505 | 0.094203 | 1 AC022400.1     | -      |
| ENSG00000234750 | 5.640214  | -1.573505 | 0.094203 | 1 CTD-2666L21.2  | K02981 |
| ENSG00000244159 | 5.640214  | -1.573505 | 0.094203 | 1 RP11-1070A24.1 | K02977 |
| ENSG00000247473 | 5.640214  | -1.573505 | 0.094203 | 1 CARS-AS1       | -      |
| ENSG00000253307 | 5.640214  | -1.573505 | 0.094203 | 1 RP11-10J21.4   | -      |
| ENSG00000253730 | 5.640214  | -1.573505 | 0.094203 | 1 RP11-893F2.13  | -      |
| ENSG00000256443 | 5.640214  | -1.573505 | 0.094203 | 1 RP11-794G24.1  | -      |
| ENSG00000259165 | 5.640214  | -1.573505 | 0.094203 | 1 DDX18P1        | K13179 |
| ENSG00000260367 | 5.640214  | -1.573505 | 0.094203 | 1 RP11-264B17.4  | -      |
| ENSG00000261457 | 5.640214  | -1.573505 | 0.094203 | 1 AC002519.6     | K04382 |
| ENSG00000267560 | 5.640214  | -1.573505 | 0.094203 | 1 RP11-173A16.1  | -      |
| ENSG00000267645 | 5.640214  | -1.573505 | 0.094203 | 1 POLR2J2        | K03008 |
| ENSG00000267676 | 5.640214  | -1.573505 | 0.094203 | 1 THA1P          | K01620 |
| ENSG00000268204 | 5.640214  | -1.573505 | 0.094203 | 1 CTD-3214H19.6  | -      |
| ENSG00000271921 | 5.640214  | -1.573505 | 0.094203 | 1 RP4-740C4.9    | -      |
| ENSG00000100253 | -5.413723 | -1.217337 | 0.094203 | 1 MIOX           | K00469 |
| ENSG00000101076 | -5.413723 | -1.217337 | 0.094203 | 1 HNF4A          | K07292 |
| ENSG00000115009 | -5.413723 | -1.217337 | 0.094203 | 1 CCL20          | K14625 |
| ENSG00000148143 | -5.413723 | -1.217337 | 0.094203 | 1 ZNF462         | -      |

|                 |           |           |          |                  |        |
|-----------------|-----------|-----------|----------|------------------|--------|
| ENSG00000157653 | -5.413723 | -1.217337 | 0.094203 | 1 C9orf43        | K07524 |
| ENSG00000179921 | -5.413723 | -1.217337 | 0.094203 | 1 GPBAR1         | K08400 |
| ENSG00000180209 | -5.413723 | -1.217337 | 0.094203 | 1 MYLPF          | K12758 |
| ENSG00000182261 | -5.413723 | -1.217337 | 0.094203 | 1 NLRP10         | -      |
| ENSG00000184502 | -5.413723 | -1.217337 | 0.094203 | 1 GAST           | K13768 |
| ENSG00000184564 | -5.413723 | -1.217337 | 0.094203 | 1 SLITRK6        | -      |
| ENSG00000184787 | -5.413723 | -1.217337 | 0.094203 | 1 UBE2G2         | K04555 |
| ENSG00000197576 | -5.413723 | -1.217337 | 0.094203 | 1 HOXA4          | K09304 |
| ENSG00000203401 | -5.413723 | -1.217337 | 0.094203 | 1 AC009061.1     | K04613 |
| ENSG00000225506 | -5.413723 | -1.217337 | 0.094203 | 1 CYP4A22-AS1    | -      |
| ENSG00000229167 | -5.413723 | -1.217337 | 0.094203 | 1 RP11-73M7.1    | -      |
| ENSG00000235078 | -5.413723 | -1.217337 | 0.094203 | 1 AC142528.1     | -      |
| ENSG00000238832 | -5.413723 | -1.217337 | 0.094203 | 1 snoU109        | -      |
| ENSG00000240211 | -5.413723 | -1.217337 | 0.094203 | 1 RP11-758P17.3  | -      |
| ENSG00000242569 | -5.413723 | -1.217337 | 0.094203 | 1 RP11-435B5.3   | -      |
| ENSG00000243819 | -5.413723 | -1.217337 | 0.094203 | 1 RN7SL832P      | -      |
| ENSG00000254619 | -5.413723 | -1.217337 | 0.094203 | 1 RP11-646J21.4  | -      |
| ENSG00000259316 | -5.413723 | -1.217337 | 0.094203 | 1 CTD-2116N17.1  | -      |
| ENSG00000259523 | -5.413723 | -1.217337 | 0.094203 | 1 RP11-680F8.3   | -      |
| ENSG00000260394 | -5.413723 | -1.217337 | 0.094203 | 1 LA16c-313D11.9 | -      |
| ENSG00000264573 | -5.413723 | -1.217337 | 0.094203 | 1 RN7SL15P       | -      |
| ENSG00000266411 | -5.413723 | -1.217337 | 0.094203 | 1 RP11-180P8.3   | -      |
| ENSG00000267093 | -5.413723 | -1.217337 | 0.094203 | 1 CTD-2105E13.13 | -      |
| ENSG00000267199 | -5.413723 | -1.217337 | 0.094203 | 1 RP11-861E21.2  | -      |
| ENSG00000267340 | -5.413723 | -1.217337 | 0.094203 | 1 RP11-242D8.3   | -      |
| ENSG00000269999 | -5.413723 | -1.217337 | 0.094203 | 1 CTD-3185P2.2   | -      |
| ENSG00000270757 | -5.413723 | -1.217337 | 0.094203 | 1 HSPE1-MOB4     | K04078 |
| ENSG00000270761 | -5.413723 | -1.217337 | 0.094203 | 1 RP11-385F7.1   | -      |
| ENSG00000270923 | -5.413723 | -1.217337 | 0.094203 | 1 TAS2R6         | K08474 |
| ENSG00000272524 | -5.413723 | -1.217337 | 0.094203 | 1 RP11-254F7.4   | -      |
| ENSG00000273489 | -5.413723 | -1.217337 | 0.094203 | 1 RP11-180C16.1  | -      |
| ENSG00000107593 | 2.843859  | -1.411664 | 0.094203 | 1 PKD2L1         | K04990 |
| ENSG00000135439 | 2.843859  | -1.411664 | 0.094203 | 1 AGAP2          | K17848 |
| ENSG00000137878 | 2.843859  | -1.411664 | 0.094203 | 1 GCOM1          | -      |
| ENSG00000149926 | 2.843859  | -1.411664 | 0.094203 | 1 FAM57B         | -      |
| ENSG00000166313 | 2.843859  | -1.411664 | 0.094203 | 1 APBB1          | K04529 |
| ENSG00000172818 | 2.843859  | -1.411664 | 0.094203 | 1 OVOL1          | K09216 |
| ENSG00000174038 | 2.843859  | -1.411664 | 0.094203 | 1 C9orf131       | -      |
| ENSG00000179059 | 2.843859  | -1.411664 | 0.094203 | 1 ZFP42          | K11516 |
| ENSG00000180316 | 2.843859  | -1.411664 | 0.094203 | 1 PNPLA1         | K16813 |
| ENSG00000201390 | 2.843859  | -1.411664 | 0.094203 | 1 RNU6-1141P     | -      |
| ENSG00000213453 | 2.843859  | -1.411664 | 0.094203 | 1 FTH1P3         | K00522 |
| ENSG00000214278 | 2.843859  | -1.411664 | 0.094203 | 1 CTD-2228K2.2   | K02520 |
| ENSG00000215481 | 2.843859  | -1.411664 | 0.094203 | 1 BCRP3          | K08878 |
| ENSG00000215704 | 2.843859  | -1.411664 | 0.094203 | 1 CELA2B         | K01346 |
| ENSG00000225037 | 2.843859  | -1.411664 | 0.094203 | 1 EIF1AX-AS1     | -      |
| ENSG00000225071 | 2.843859  | -1.411664 | 0.094203 | 1 GS1-184P14.2   | K02976 |
| ENSG00000227218 | 2.843859  | -1.411664 | 0.094203 | 1 RP11-203J24.8  | -      |
| ENSG00000227698 | 2.843859  | -1.411664 | 0.094203 | 1 AP001619.2     | -      |
| ENSG00000230666 | 2.843859  | -1.411664 | 0.094203 | 1 CEACAM22P      | K06499 |
| ENSG00000231703 | 2.843859  | -1.411664 | 0.094203 | 1 RP4-669H2.1    | -      |
| ENSG00000232386 | 2.843859  | -1.411664 | 0.094203 | 1 RP11-66B24.2   | -      |
| ENSG00000232490 | 2.843859  | -1.411664 | 0.094203 | 1 OSBPL10-AS1    | -      |
| ENSG00000234354 | 2.843859  | -1.411664 | 0.094203 | 1 RPS26P47       | K02976 |
| ENSG00000250292 | 2.843859  | -1.411664 | 0.094203 | 1 RP11-451F20.1  | -      |
| ENSG00000250645 | 2.843859  | -1.411664 | 0.094203 | 1 CTD-2228K2.1   | -      |
| ENSG00000250742 | 2.843859  | -1.411664 | 0.094203 | 1 RP11-834C11.4  | -      |
| ENSG00000255342 | 2.843859  | -1.411664 | 0.094203 | 1 RP11-762B21.5  | K17986 |

|                 |           |           |          |                  |        |
|-----------------|-----------|-----------|----------|------------------|--------|
| ENSG00000258521 | 2.843859  | -1.411664 | 0.094203 | 1 RP11-638I2.9   | -      |
| ENSG00000259287 | 2.843859  | -1.411664 | 0.094203 | 1 RP11-3D4.2     | -      |
| ENSG00000262585 | 2.843859  | -1.411664 | 0.094203 | 1 RP11-353N14.5  | -      |
| ENSG00000262686 | 2.843859  | -1.411664 | 0.094203 | 1 AC005356.1     | -      |
| ENSG00000266261 | 2.843859  | -1.411664 | 0.094203 | 1 RP11-640I15.1  | -      |
| ENSG00000267632 | 2.843859  | -1.411664 | 0.094203 | 1 RP11-400F19.18 | -      |
| ENSG00000269481 | 2.843859  | -1.411664 | 0.094203 | 1 CTD-2521M24.6  | -      |
| ENSG00000272024 | 2.843859  | -1.411664 | 0.094203 | 1 RP11-546K22.3  | -      |
| ENSG00000273289 | 2.843859  | -1.411664 | 0.094203 | 1 RP6-109B7.5    | -      |
| ENSG00000043591 | -1.533267 | 0.796459  | 0.094618 | 1 ADRB1          | K04141 |
| ENSG00000242759 | -1.533267 | 0.796459  | 0.094618 | 1 LINC00882      | -      |
| ENSG00000135709 | 1.159004  | 3.461358  | 0.094929 | 1 KIAA0513       | -      |
| ENSG00000259820 | 1.289513  | 1.678863  | 0.095587 | 1 AC083843.1     | -      |
| ENSG00000253217 | 1.228682  | 2.291599  | 0.095685 | 1 KB-1991G8.1    | -      |
| ENSG00000178222 | 1.380021  | 1.255244  | 0.095725 | 1 RNF212         | K04354 |
| ENSG00000256087 | 1.138191  | 3.998924  | 0.095837 | 1 ZNF432         | K09228 |
| ENSG00000137825 | 1.195795  | 2.560603  | 0.095921 | 1 ITPKA          | K00911 |
| ENSG00000171219 | 1.232514  | 2.039225  | 0.096179 | 1 CDC42BPG       | K16307 |
| ENSG00000175984 | 1.232514  | 2.039225  | 0.096179 | 1 DENND2C        | K11447 |
| ENSG00000079335 | -1.219766 | 2.656063  | 0.096547 | 1 CDC14A         | K06639 |
| ENSG00000117228 | -1.93237  | 0.237034  | 0.096786 | 1 GBP1           | -      |
| ENSG00000196335 | -1.93237  | 0.237034  | 0.096786 | 1 STK31          | K16316 |
| ENSG00000208317 | -1.93237  | 0.237034  | 0.096786 | 1 SNORD78        | -      |
| ENSG00000225377 | -1.93237  | 0.237034  | 0.096786 | 1 RP5-1103G7.4   | -      |
| ENSG00000111181 | 1.60363   | 0.043337  | 0.096786 | 1 SLC6A12        | K05039 |
| ENSG00000180720 | 1.60363   | 0.043337  | 0.096786 | 1 CHRM4          | K04132 |
| ENSG00000197653 | 1.60363   | 0.043337  | 0.096786 | 1 DNAH10         | K10408 |
| ENSG00000213626 | 1.60363   | 0.043337  | 0.096786 | 1 LBH            | K09228 |
| ENSG00000231274 | 1.60363   | 0.043337  | 0.096786 | 1 SBK3           | K08858 |
| ENSG00000244176 | 1.60363   | 0.043337  | 0.096786 | 1 RP11-810P12.1  | K02981 |
| ENSG00000110881 | 1.257908  | 2.090216  | 0.097062 | 1 ASIC1          | K04829 |
| ENSG00000134531 | -1.111643 | 5.678995  | 0.097164 | 1 EMP1           | -      |
| ENSG00000163577 | -1.257042 | 2.47896   | 0.097831 | 1 EIF5A2         | K03263 |
| ENSG00000229891 | 1.153114  | 3.379342  | 0.098405 | 1 Z83851.1       | -      |
| ENSG00000185650 | -1.101937 | 6.273747  | 0.098547 | 1 ZFP36L1        | K18753 |
| ENSG00000261326 | 1.263104  | 1.833833  | 0.098858 | 1 RP5-1057J7.6   | -      |
| ENSG00000166068 | -1.118768 | 4.451535  | 0.099672 | 1 SPRED1         | K04703 |
| ENSG00000258168 | -1.278978 | 1.972212  | 0.099813 | 1 RP11-588H23.3  | -      |
| ENSG00000104951 | -2.672216 | -0.451326 | 0.099976 | 1 IL4I1          | K03334 |
| ENSG00000118997 | -2.672216 | -0.451326 | 0.099976 | 1 DNAH7          | K10408 |
| ENSG00000171943 | -2.672216 | -0.451326 | 0.099976 | 1 SRGAP2C        | K07526 |
| ENSG00000197980 | -2.672216 | -0.451326 | 0.099976 | 1 LEKR1          | -      |
| ENSG00000225968 | -2.672216 | -0.451326 | 0.099976 | 1 ELFN1          | K17567 |
| ENSG00000241476 | -2.672216 | -0.451326 | 0.099976 | 1 SSX2           | K15625 |
| ENSG00000250629 | -2.672216 | -0.451326 | 0.099976 | 1 RP11-122C5.3   | -      |
| ENSG00000007312 | 1.803588  | -0.660047 | 0.099976 | 1 CD79B          | K06507 |
| ENSG00000009724 | 1.803588  | -0.660047 | 0.099976 | 1 MASP2          | K03993 |
| ENSG00000125841 | 1.803588  | -0.660047 | 0.099976 | 1 NRSN2          | -      |
| ENSG00000133020 | 1.803588  | -0.660047 | 0.099976 | 1 MYH8           | K10352 |
| ENSG00000135346 | 1.803588  | -0.660047 | 0.099976 | 1 CGA            | K08522 |
| ENSG00000135436 | 1.803588  | -0.660047 | 0.099976 | 1 FAM186B        | -      |
| ENSG00000159761 | 1.803588  | -0.660047 | 0.099976 | 1 C16orf86       | -      |
| ENSG00000177854 | 1.803588  | -0.660047 | 0.099976 | 1 TMEM187        | -      |
| ENSG00000182472 | 1.803588  | -0.660047 | 0.099976 | 1 CAPN12         | K04740 |
| ENSG00000184786 | 1.803588  | -0.660047 | 0.099976 | 1 TCTE3          | -      |
| ENSG00000255994 | 1.803588  | -0.660047 | 0.099976 | 1 CCDC177        | -      |
| ENSG00000268265 | 1.803588  | -0.660047 | 0.099976 | 1 AP000304.1     | -      |
| ENSG00000272502 | 1.803588  | -0.660047 | 0.099976 | 1 RP11-713M15.2  | -      |

|                 |           |           |          |                 |        |
|-----------------|-----------|-----------|----------|-----------------|--------|
| ENSG00000273355 | 1.803588  | -0.660047 | 0.099976 | 1 RP11-672L10.6 | -      |
| ENSG00000086289 | -1.189726 | 3.043969  | 0.100357 | 1 EPDR1         | -      |
| ENSG00000198959 | -1.246844 | 2.026495  | 0.100711 | 1 TGM2          | K05625 |
| ENSG00000145198 | 1.658005  | 0.225508  | 0.101169 | 1 VWA5B2        | -      |
| ENSG00000165995 | 1.658005  | 0.225508  | 0.101169 | 1 CACNB2        | K04863 |
| ENSG00000271851 | 1.658005  | 0.225508  | 0.101169 | 1 RP11-565F19.2 | -      |
| ENSG00000183018 | -1.641647 | 0.373671  | 0.101169 | 1 SPNS2         | -      |
| ENSG00000233247 | -1.641647 | 0.373671  | 0.101169 | 1 GS1-257G1.1   | K06689 |
| ENSG00000248126 | -1.443677 | 1.098022  | 0.101443 | 1 CTD-2012J19.2 | -      |
| ENSG00000205336 | 1.09197   | 5.638787  | 0.102288 | 1 GPR56         | K08450 |
| ENSG00000105289 | 1.161545  | 3.105736  | 0.102301 | 1 TJP3          | K06097 |
| ENSG00000123405 | 1.107606  | 4.2604    | 0.102326 | 1 NFE2          | K09039 |
| ENSG00000257596 | 1.305203  | 1.594748  | 0.102406 | 1 RP11-968A15.2 | -      |
| ENSG00000173295 | -1.176161 | 2.961622  | 0.102572 | 1 FAM86B3P      | -      |
| ENSG00000123609 | -1.109213 | 4.746511  | 0.102576 | 1 NMI           | -      |
| ENSG00000188660 | 1.098535  | 4.729168  | 0.102576 | 1 LINC00319     | -      |
| ENSG00000147689 | 1.078486  | 7.93307   | 0.10334  | 1 FAM83A        | -      |
| ENSG00000269729 | -1.338507 | 1.754887  | 0.10344  | 1 AC006262.4    | -      |
| ENSG00000103056 | 1.129424  | 3.539505  | 0.103813 | 1 SMPD3         | K12352 |
| ENSG00000176697 | -1.115324 | 4.100602  | 0.104096 | 1 BDNF          | K04355 |
| ENSG00000126218 | 1.607627  | 0.331044  | 0.104627 | 1 F10           | K01314 |
| ENSG00000235052 | 1.607627  | 0.331044  | 0.104627 | 1 RP1-150O5.3   | -      |
| ENSG00000261360 | 1.607627  | 0.331044  | 0.104627 | 1 CTD-2165H16.4 | -      |
| ENSG00000220848 | 1.472294  | 0.373533  | 0.104627 | 1 RPS18P9       | K02964 |
| ENSG00000166407 | 1.134241  | 3.27005   | 0.104927 | 1 LMO1          | -      |
| ENSG00000227896 | 1.275572  | 1.758402  | 0.10529  | 1 RP11-77P6.2   | -      |
| ENSG00000196911 | -1.164427 | 2.915588  | 0.105472 | 1 KPNA5         | K15042 |
| ENSG00000153391 | -1.127115 | 3.529792  | 0.105499 | 1 INO80C        | K11667 |
| ENSG00000178922 | -1.106055 | 4.390289  | 0.105543 | 1 HYI           | K01816 |
| ENSG00000165300 | -1.112833 | 4.194265  | 0.105587 | 1 SLITRK5       | -      |
| ENSG00000123358 | -1.079061 | 6.199129  | 0.105828 | 1 NR4A1         | K04465 |
| ENSG00000197582 | -1.296609 | 1.903377  | 0.10612  | 1 GPX1P1        | K00432 |
| ENSG00000266036 | 1.227552  | 1.810929  | 0.10612  | 1 MIR3615       | -      |
| ENSG00000109062 | 1.070751  | 7.262845  | 0.106233 | 1 SLC9A3R1      | K13365 |
| ENSG00000168874 | 1.084553  | 4.847161  | 0.106551 | 1 ATOH8         | K09084 |
| ENSG00000185168 | 1.25735   | 1.870136  | 0.106896 | 1 LINC00482     | -      |
| ENSG00000173281 | 1.09984   | 3.911356  | 0.107168 | 1 PPP1R3B       | K07189 |
| ENSG00000136869 | -1.667503 | 0.664977  | 0.107412 | 1 TLR4          | K10160 |
| ENSG00000196511 | -1.230387 | 2.015003  | 0.107623 | 1 TPK1          | K00949 |
| ENSG00000168016 | -1.221467 | 2.454065  | 0.107908 | 1 TRANK1        | -      |
| ENSG00000197608 | 1.102161  | 3.857702  | 0.108432 | 1 ZNF841        | K09228 |
| ENSG00000174483 | 1.296166  | 1.380375  | 0.108433 | 1 BBS1          | K16746 |
| ENSG00000205221 | 1.09947   | 3.920108  | 0.10926  | 1 VIT           | -      |
| ENSG00000216657 | -2.004929 | -0.176905 | 0.109379 | 1 RP3-406P24.1  | -      |
| ENSG00000233589 | -2.004929 | -0.176905 | 0.109379 | 1 RP4-694A7.2   | -      |
| ENSG00000259712 | -2.004929 | -0.176905 | 0.109379 | 1 CTD-2184D3.5  | -      |
| ENSG00000126759 | 1.852208  | -0.381659 | 0.109379 | 1 CFP           | K15412 |
| ENSG00000182782 | 1.852208  | -0.381659 | 0.109379 | 1 HCAR2         | K08402 |
| ENSG00000185507 | 1.852208  | -0.381659 | 0.109379 | 1 IRF7          | K09447 |
| ENSG00000186376 | 1.852208  | -0.381659 | 0.109379 | 1 ZNF75D        | K09229 |
| ENSG00000228204 | 1.852208  | -0.381659 | 0.109379 | 1 RP4-724E13.2  | -      |
| ENSG00000255503 | 1.852208  | -0.381659 | 0.109379 | 1 RP11-113K21.4 | -      |
| ENSG00000269927 | 1.852208  | -0.381659 | 0.109379 | 1 RP6-91H8.3    | -      |
| ENSG00000168772 | -1.347485 | 1.557274  | 0.109441 | 1 CXXC4         | K03344 |
| ENSG00000220378 | 1.287132  | 1.429583  | 0.109441 | 1 KRT8P42       | K07605 |
| ENSG00000151229 | -1.107066 | 3.804591  | 0.109463 | 1 SLC2A13       | K08150 |
| ENSG00000183186 | 1.496361  | 0.608886  | 0.109695 | 1 C2CD4C        | -      |
| ENSG00000256061 | -1.492817 | 0.767812  | 0.109695 | 1 DYX1C1        | K19758 |

|                 |           |           |          |                 |        |
|-----------------|-----------|-----------|----------|-----------------|--------|
| ENSG00000227963 | 1.390762  | 0.643529  | 0.109695 | 1 RP5-1074L1.1  | -      |
| ENSG00000234373 | 1.370027  | 0.723613  | 0.111592 | 1 SNX18P7       | K17299 |
| ENSG00000137965 | -1.05073  | 7.17996   | 0.113145 | 1 IFI44         | -      |
| ENSG00000260000 | -1.50046  | 0.96784   | 0.113191 | 1 RP3-467N11.1  | -      |
| ENSG00000169271 | 1.421718  | 0.842714  | 0.113191 | 1 HSPB3         | K09544 |
| ENSG00000228451 | 1.421718  | 0.842714  | 0.113191 | 1 SDAD1P1       | K14856 |
| ENSG00000142279 | 1.335138  | 0.871857  | 0.113191 | 1 WTIP          | K16682 |
| ENSG00000144045 | 1.335138  | 0.871857  | 0.113191 | 1 DQX1          | K14433 |
| ENSG00000136999 | -1.059817 | 5.541446  | 0.113428 | 1 NOV           | -      |
| ENSG00000184481 | 1.108746  | 3.489808  | 0.113482 | 1 FOXO4         | K12358 |
| ENSG00000058668 | 1.047695  | 7.062058  | 0.114003 | 1 ATP2B4        | K05850 |
| ENSG00000257315 | 1.222653  | 1.847765  | 0.114505 | 1 ZBED6         | -      |
| ENSG00000260604 | 1.183306  | 1.861539  | 0.114505 | 1 RP1-140K8.5   | -      |
| ENSG00000175221 | 1.061738  | 5.09675   | 0.114518 | 1 MED16         | K15159 |
| ENSG00000166073 | -1.145312 | 2.604438  | 0.115066 | 1 GPR176        | K08442 |
| ENSG00000091262 | 1.74772   | -0.226119 | 0.11546  | 1 ABCC6         | K05669 |
| ENSG00000105707 | 1.74772   | -0.226119 | 0.11546  | 1 HPN           | K08665 |
| ENSG00000157999 | 1.74772   | -0.226119 | 0.11546  | 1 ANKRD61       | -      |
| ENSG00000171450 | 1.74772   | -0.226119 | 0.11546  | 1 CDK5R2        | K11716 |
| ENSG00000179083 | 1.74772   | -0.226119 | 0.11546  | 1 FAM133A       | -      |
| ENSG00000203288 | 1.74772   | -0.226119 | 0.11546  | 1 RP11-98D18.9  | -      |
| ENSG00000135698 | -1.078551 | 4.008228  | 0.115894 | 1 MPHOSPH6      | K12593 |
| ENSG00000147872 | 1.046801  | 6.02781   | 0.115953 | 1 PLIN2         | K17284 |
| ENSG00000163395 | 1.353437  | 1.1061    | 0.11674  | 1 IGFN1         | -      |
| ENSG00000261553 | 1.353437  | 1.1061    | 0.11674  | 1 RP11-29G8.3   | -      |
| ENSG00000145632 | -1.038055 | 8.005947  | 0.116757 | 1 PLK2          | K08861 |
| ENSG00000131459 | 1.043011  | 5.932914  | 0.117173 | 1 GFPT2         | K00820 |
| ENSG00000131370 | 1.072063  | 3.963349  | 0.117778 | 1 SH3BP5        | K04613 |
| ENSG00000197614 | 1.035576  | 6.949947  | 0.118284 | 1 MFAP5         | K12581 |
| ENSG00000260285 | 1.255403  | 1.29782   | 0.118412 | 1 RP11-600F24.7 | -      |
| ENSG00000103089 | 1.049247  | 4.606391  | 0.11918  | 1 FA2H          | K19703 |
| ENSG00000163660 | -1.032392 | 7.223037  | 0.119395 | 1 CCNL1         | -      |
| ENSG00000183172 | -1.871406 | 0.193481  | 0.119582 | 1 SMDT1         | -      |
| ENSG00000261114 | -1.871406 | 0.193481  | 0.119582 | 1 RP11-325K4.2  | -      |
| ENSG00000271614 | -1.871406 | 0.193481  | 0.119582 | 1 LINC00936     | -      |
| ENSG00000010319 | -1.807751 | 0.148421  | 0.119582 | 1 SEMA3G        | K06840 |
| ENSG00000058085 | -1.807751 | 0.148421  | 0.119582 | 1 LAMC2         | K06246 |
| ENSG00000167995 | -1.807751 | 0.148421  | 0.119582 | 1 BEST1         | K13878 |
| ENSG00000199477 | -1.807751 | 0.148421  | 0.119582 | 1 SNORA31       | -      |
| ENSG00000172728 | -1.097234 | 3.179115  | 0.119821 | 1 FUT10         | K09669 |
| ENSG00000139163 | -1.040286 | 5.528265  | 0.120305 | 1 ETNK1         | K00894 |
| ENSG00000127952 | 1.126951  | 2.562683  | 0.120456 | 1 STYXL1        | K18047 |
| ENSG00000205426 | -1.278108 | 1.712361  | 0.121234 | 1 KRT81         | K07605 |
| ENSG00000155792 | -1.219677 | 1.763381  | 0.121645 | 1 DEPTOR        | -      |
| ENSG00000204790 | -1.219677 | 1.763381  | 0.121645 | 1 CBWD6         | -      |
| ENSG00000260630 | -1.219677 | 1.763381  | 0.121645 | 1 SNAI3-AS1     | -      |
| ENSG00000232533 | -1.11241  | 2.954638  | 0.122361 | 1 AC093673.5    | -      |
| ENSG00000127578 | 1.070569  | 3.60324   | 0.122453 | 1 WFIKKN1       | -      |
| ENSG00000261770 | -1.585435 | 0.334263  | 0.122481 | 1 CTC-459F4.1   | -      |
| ENSG00000269175 | -1.585435 | 0.334263  | 0.122481 | 1 AC093157.1    | K00586 |
| ENSG00000272782 | -1.585435 | 0.334263  | 0.122481 | 1 RP4-607J23.2  | -      |
| ENSG00000166126 | 1.551735  | 0.161736  | 0.122481 | 1 AMN           | K18259 |
| ENSG00000250318 | 1.551735  | 0.161736  | 0.122481 | 1 CTA-963H5.5   | K02872 |
| ENSG00000259891 | 1.147754  | 1.839084  | 0.122678 | 1 CTA-204B4.2   | -      |
| ENSG00000115738 | 1.044196  | 4.501456  | 0.122768 | 1 ID2           | K17693 |
| ENSG00000213047 | -1.075706 | 3.762962  | 0.123061 | 1 DENND1B       | K02896 |
| ENSG00000115271 | -1.101532 | 3.212665  | 0.123607 | 1 GCA           | -      |
| ENSG00000023171 | 1.021534  | 6.742947  | 0.123608 | 1 GRAMD1B       | -      |

|                 |           |           |          |                  |        |
|-----------------|-----------|-----------|----------|------------------|--------|
| ENSG00000113356 | -1.038776 | 5.025047  | 0.123702 | 1 POLR3G         | K03024 |
| ENSG00000237187 | -1.180382 | 2.188385  | 0.124131 | 1 NR2F1-AS1      | -      |
| ENSG00000237857 | -1.180382 | 2.188385  | 0.124131 | 1 RP11-435O5.2   | -      |
| ENSG00000006283 | 1.120319  | 2.2503    | 0.124658 | 1 CACNA1G        | K04854 |
| ENSG00000029153 | -1.073622 | 3.517626  | 0.124779 | 1 ARNTL2         | K09099 |
| ENSG00000067141 | 2.267755  | -1.116915 | 0.12496  | 1 NEO1           | K06766 |
| ENSG00000105523 | 2.267755  | -1.116915 | 0.12496  | 1 FAM83E         | K00272 |
| ENSG00000106809 | 2.267755  | -1.116915 | 0.12496  | 1 OGN            | K08126 |
| ENSG00000131634 | 2.267755  | -1.116915 | 0.12496  | 1 TMEM204        | -      |
| ENSG00000183044 | 2.267755  | -1.116915 | 0.12496  | 1 ABAT           | K13524 |
| ENSG00000184678 | 2.267755  | -1.116915 | 0.12496  | 1 HIST2H2BE      | K11252 |
| ENSG00000186891 | 2.267755  | -1.116915 | 0.12496  | 1 TNFRSF18       | K05154 |
| ENSG00000188322 | 2.267755  | -1.116915 | 0.12496  | 1 SBK1           | K08858 |
| ENSG00000197149 | 2.267755  | -1.116915 | 0.12496  | 1 RP11-452G18.2  | K02981 |
| ENSG00000225808 | 2.267755  | -1.116915 | 0.12496  | 1 DNAJC19P5      | K09539 |
| ENSG00000226386 | 2.267755  | -1.116915 | 0.12496  | 1 PARD3-AS1      | -      |
| ENSG00000230929 | 2.267755  | -1.116915 | 0.12496  | 1 RP11-395C3.1   | K02942 |
| ENSG00000231154 | 2.267755  | -1.116915 | 0.12496  | 1 MORF4L2-AS1    | -      |
| ENSG00000233613 | 2.267755  | -1.116915 | 0.12496  | 1 DCUN1D2-AS     | -      |
| ENSG00000234230 | 2.267755  | -1.116915 | 0.12496  | 1 ZFX-AS1        | -      |
| ENSG00000235651 | 2.267755  | -1.116915 | 0.12496  | 1 AC064850.4     | K17265 |
| ENSG00000243056 | 2.267755  | -1.116915 | 0.12496  | 1 EIF4EBP3       | K18645 |
| ENSG00000253174 | 2.267755  | -1.116915 | 0.12496  | 1 RP11-360L9.7   | -      |
| ENSG00000260296 | 2.267755  | -1.116915 | 0.12496  | 1 RP11-395I6.3   | -      |
| ENSG00000261372 | 2.267755  | -1.116915 | 0.12496  | 1 RP11-529H20.6  | -      |
| ENSG00000264269 | 2.267755  | -1.116915 | 0.12496  | 1 RP11-15F12.1   | -      |
| ENSG00000267058 | 2.267755  | -1.116915 | 0.12496  | 1 RP11-15A1.3    | -      |
| ENSG00000267834 | 2.267755  | -1.116915 | 0.12496  | 1 RP11-167N5.5   | -      |
| ENSG00000268869 | 2.267755  | -1.116915 | 0.12496  | 1 ESPNP          | -      |
| ENSG00000269834 | 2.267755  | -1.116915 | 0.12496  | 1 CTD-3018O17.3  | -      |
| ENSG00000271858 | 2.267755  | -1.116915 | 0.12496  | 1 XXcos-LUCA11.4 | -      |
| ENSG00000272666 | 2.267755  | -1.116915 | 0.12496  | 1 CTA-384D8.35   | -      |
| ENSG00000264868 | 1.114459  | 2.356614  | 0.125095 | 1 CTB-167B5.2    | -      |
| ENSG00000100867 | 1.441195  | 0.469092  | 0.12613  | 1 DHRS2          | K11164 |
| ENSG00000137501 | 1.441195  | 0.469092  | 0.12613  | 1 SYTL2          | K17598 |
| ENSG00000268575 | 1.441195  | 0.469092  | 0.12613  | 1 RP1-283E3.8    | -      |
| ENSG00000273230 | 1.077692  | 2.705135  | 0.126209 | 1 RP11-1246C19.1 | -      |
| ENSG00000207523 | -1.4512   | 0.738518  | 0.127301 | 1 SNORA66        | -      |
| ENSG00000214708 | 1.414283  | 0.558872  | 0.127301 | 1 AC090616.2     | K07870 |
| ENSG00000160888 | -1.008098 | 7.64828   | 0.127745 | 1 IER2           | -      |
| ENSG00000141639 | 1.025446  | 4.920432  | 0.127789 | 1 MAPK4          | K06855 |
| ENSG00000172296 | 1.059612  | 3.607009  | 0.127903 | 1 SPTLC3         | K00654 |
| ENSG00000008517 | -1.048926 | 3.785034  | 0.128074 | 1 IL32           | -      |
| ENSG00000165775 | 1.351609  | 0.799589  | 0.128892 | 1 FUNDC2         | -      |
| ENSG00000107317 | -1.275377 | 1.131486  | 0.129867 | 1 PTGDS          | K01830 |
| ENSG00000259673 | -1.36815  | 1.196341  | 0.130209 | 1 IQCH-AS1       | -      |
| ENSG00000266088 | -1.36815  | 1.196341  | 0.130209 | 1 RP5-1028K7.2   | -      |
| ENSG00000244558 | 1.294739  | 1.069618  | 0.130209 | 1 RP11-445H22.4  | -      |
| ENSG00000185483 | -1.042875 | 4.03482   | 0.130449 | 1 ROR1           | K05122 |
| ENSG00000160352 | -1.042328 | 3.634579  | 0.130682 | 1 ZNF714         | K09228 |
| ENSG00000249803 | -1.250375 | 1.374979  | 0.130701 | 1 RP11-114H21.2  | -      |
| ENSG00000243335 | 1.052375  | 3.158069  | 0.130964 | 1 KCTD7          | K01623 |
| ENSG00000233280 | 1.180879  | 1.466948  | 0.131133 | 1 CRYBG3         | -      |
| ENSG00000197279 | -1.096836 | 2.830198  | 0.131208 | 1 ZNF165         | K09230 |
| ENSG00000139537 | 1.075625  | 2.783646  | 0.131208 | 1 CCDC65         | -      |
| ENSG00000155542 | -1.104645 | 2.754309  | 0.131259 | 1 SETD9          | -      |
| ENSG00000163701 | 1.199787  | 1.709952  | 0.131399 | 1 IL17RE         | K05168 |
| ENSG00000175873 | 1.199787  | 1.709952  | 0.131399 | 1 AC004840.9     | -      |



|                 |           |           |          |                   |        |
|-----------------|-----------|-----------|----------|-------------------|--------|
| ENSG00000163286 | 1.156933  | 1.725204  | 0.131399 | 1 ALPPL2          | K01077 |
| ENSG00000142182 | 1.137528  | 1.978344  | 0.131498 | 1 DNMT3L          | K17400 |
| ENSG00000143797 | -1.143766 | 2.097089  | 0.131501 | 1 MBOAT2          | K13517 |
| ENSG00000233621 | 1.021522  | 4.549375  | 0.131676 | 1 LINC01137       | -      |
| ENSG00000130720 | 1.005551  | 4.995572  | 0.133327 | 1 FIBCD1          | -      |
| ENSG00000117226 | -1.043878 | 3.70002   | 0.133337 | 1 GBP3            | -      |
| ENSG00000128016 | -1.010042 | 4.828396  | 0.133825 | 1 ZFP36           | K15308 |
| ENSG00000166510 | -1.03416  | 3.960862  | 0.135032 | 1 CCDC68          | -      |
| ENSG00000131389 | 0.995431  | 5.924888  | 0.135037 | 1 SLC6A6          | K05039 |
| ENSG00000204397 | -1.056999 | 3.088478  | 0.135175 | 1 CARD16          | K01370 |
| ENSG00000173641 | 1.019469  | 3.821778  | 0.135464 | 1 HSPB7           | K09546 |
| ENSG00000183762 | 1.008376  | 4.45424   | 0.136647 | 1 KREMEN1         | K08857 |
| ENSG00000122641 | -2.566618 | -0.524634 | 0.137874 | 1 INHBA           | K04667 |
| ENSG00000178146 | -2.566618 | -0.524634 | 0.137874 | 1 RP1-232L22__B.1 | K00864 |
| ENSG00000213676 | -2.566618 | -0.524634 | 0.137874 | 1 ATF6B           | K09049 |
| ENSG00000223459 | -2.566618 | -0.524634 | 0.137874 | 1 FAM115B         | -      |
| ENSG00000237399 | -2.566618 | -0.524634 | 0.137874 | 1 PITRM1-AS1      | -      |
| ENSG00000268995 | -2.566618 | -0.524634 | 0.137874 | 1 VN1R82P         | -      |
| ENSG00000270574 | -2.566618 | -0.524634 | 0.137874 | 1 RP11-171I2.2    | -      |
| ENSG00000271380 | -2.566618 | -0.524634 | 0.137874 | 1 RP11-307C12.12  | -      |
| ENSG00000109321 | -2.452675 | -0.602253 | 0.137874 | 1 AREG            | K09782 |
| ENSG00000157227 | -2.452675 | -0.602253 | 0.137874 | 1 MMP14           | K07763 |
| ENSG00000168539 | -2.452675 | -0.602253 | 0.137874 | 1 CHRM1           | K04129 |
| ENSG00000186648 | -2.452675 | -0.602253 | 0.137874 | 1 LRRC16B         | -      |
| ENSG00000203711 | -2.452675 | -0.602253 | 0.137874 | 1 C6orf99         | -      |
| ENSG00000218537 | -2.452675 | -0.602253 | 0.137874 | 1 AP000350.4      | K07253 |
| ENSG00000230555 | -2.452675 | -0.602253 | 0.137874 | 1 RP11-517P14.2   | -      |
| ENSG00000233825 | -2.452675 | -0.602253 | 0.137874 | 1 RP11-135A24.4   | -      |
| ENSG00000234292 | -2.452675 | -0.602253 | 0.137874 | 1 RP11-213H15.1   | -      |
| ENSG00000244733 | -2.452675 | -0.602253 | 0.137874 | 1 RP11-506M13.3   | -      |
| ENSG00000135094 | 2.199354  | -0.752064 | 0.137874 | 1 SDS             | K17989 |
| ENSG00000149781 | 2.199354  | -0.752064 | 0.137874 | 1 FERMT3          | K17084 |
| ENSG00000202337 | 2.199354  | -0.752064 | 0.137874 | 1 RNU6-8          | -      |
| ENSG00000214279 | 2.199354  | -0.752064 | 0.137874 | 1 RP11-108K14.4   | -      |
| ENSG00000218890 | 2.199354  | -0.752064 | 0.137874 | 1 NUFIP1P         | -      |
| ENSG00000225578 | 2.199354  | -0.752064 | 0.137874 | 1 NCBP2-AS1       | -      |
| ENSG00000230756 | 2.199354  | -0.752064 | 0.137874 | 1 RHOQP3          | K07194 |
| ENSG00000236008 | 2.199354  | -0.752064 | 0.137874 | 1 AC011747.4      | -      |
| ENSG00000236882 | 2.199354  | -0.752064 | 0.137874 | 1 C5orf27         | -      |
| ENSG00000237940 | 2.199354  | -0.752064 | 0.137874 | 1 AC093642.3      | -      |
| ENSG00000244399 | 2.199354  | -0.752064 | 0.137874 | 1 RN7SL251P       | -      |
| ENSG00000259933 | 2.199354  | -0.752064 | 0.137874 | 1 RP11-304L19.1   | -      |
| ENSG00000261226 | 2.199354  | -0.752064 | 0.137874 | 1 RP11-830F9.7    | -      |
| ENSG00000132196 | -1.018412 | 3.803602  | 0.138225 | 1 HSD17B7         | K13373 |
| ENSG00000036672 | 1.03759   | 3.148502  | 0.138775 | 1 USP2            | K11833 |
| ENSG00000132832 | 1.037549  | 3.103241  | 0.139034 | 1 RP11-445H22.3   | -      |
| ENSG00000196284 | -1.059202 | 3.057258  | 0.139597 | 1 SUPT3H          | K11313 |
| ENSG00000146278 | 0.977753  | 6.658973  | 0.139991 | 1 PNRC1           | K18774 |
| ENSG00000161277 | 1.104424  | 1.957542  | 0.140049 | 1 THAP8           | -      |
| ENSG00000228649 | -1.204883 | 1.839271  | 0.141201 | 1 AC005682.5      | -      |
| ENSG00000079308 | 0.979771  | 5.678829  | 0.141759 | 1 TNS1            | K18080 |
| ENSG00000174842 | -0.987893 | 4.878193  | 0.142357 | 1 GLMN            | -      |
| ENSG00000157657 | -1.025965 | 3.220736  | 0.142496 | 1 ZNF618          | -      |
| ENSG00000102178 | 1.176235  | 1.513264  | 0.142605 | 1 UBL4A           | -      |
| ENSG00000185220 | -1.03461  | 3.1972    | 0.142675 | 1 PGBD2           | -      |
| ENSG00000188191 | -0.999189 | 4.494161  | 0.143062 | 1 PRKAR1B         | K04739 |
| ENSG00000261094 | 1.191179  | 1.369701  | 0.143419 | 1 RP11-355O1.11   | -      |
| ENSG00000131778 | 1.137074  | 1.389333  | 0.143419 | 1 CHD1L           | -      |

|                 |           |           |          |                 |        |
|-----------------|-----------|-----------|----------|-----------------|--------|
| ENSG00000261113 | 1.137074  | 1.389333  | 0.143419 | 1 RP11-141O15.1 | -      |
| ENSG00000083750 | -1.019985 | 3.505341  | 0.143467 | 1 RRAGB         | K16185 |
| ENSG00000167281 | -1.91835  | -0.236621 | 0.143889 | 1 RBFOX3        | K14946 |
| ENSG00000179428 | -1.91835  | -0.236621 | 0.143889 | 1 AC073072.5    | -      |
| ENSG00000261534 | -1.91835  | -0.236621 | 0.143889 | 1 RP11-244O19.1 | -      |
| ENSG00000273387 | -1.91835  | -0.236621 | 0.143889 | 1 RP3-412A9.16  | -      |
| ENSG00000232324 | -1.82624  | -0.29919  | 0.143889 | 1 AC008440.10   | -      |
| ENSG00000236498 | -1.82624  | -0.29919  | 0.143889 | 1 AC107081.5    | -      |
| ENSG00000257242 | -1.82624  | -0.29919  | 0.143889 | 1 C12orf79      | -      |
| ENSG00000260060 | -1.82624  | -0.29919  | 0.143889 | 1 RP11-388M20.1 | -      |
| ENSG00000260841 | -1.82624  | -0.29919  | 0.143889 | 1 CTC-205M6.5   | -      |
| ENSG00000100314 | 1.683907  | -0.475243 | 0.143889 | 1 CABP7         | K13152 |
| ENSG00000117477 | 1.683907  | -0.475243 | 0.143889 | 1 CCDC181       | -      |
| ENSG00000143217 | 1.683907  | -0.475243 | 0.143889 | 1 PVRL4         | K06593 |
| ENSG00000162482 | 1.683907  | -0.475243 | 0.143889 | 1 AKR7A3        | K15303 |
| ENSG00000179477 | 1.683907  | -0.475243 | 0.143889 | 1 ALOX12B       | K08021 |
| ENSG00000185527 | 1.683907  | -0.475243 | 0.143889 | 1 PDE6G         | K13759 |
| ENSG00000196782 | 1.683907  | -0.475243 | 0.143889 | 1 MAML3         | K06061 |
| ENSG00000249345 | 1.683907  | -0.475243 | 0.143889 | 1 RP11-575F12.1 | -      |
| ENSG00000251411 | 1.683907  | -0.475243 | 0.143889 | 1 RP11-397E7.4  | K05757 |
| ENSG00000256849 | 1.683907  | -0.475243 | 0.143889 | 1 RP11-405A12.1 | K09493 |
| ENSG00000260403 | 1.683907  | -0.475243 | 0.143889 | 1 RP11-616M22.1 | -      |
| ENSG00000103319 | 0.976158  | 5.240112  | 0.144258 | 1 EEF2K         | K08292 |
| ENSG00000164683 | 0.976653  | 5.329348  | 0.144283 | 1 HEY1          | K09091 |
| ENSG00000146267 | -1.09117  | 2.417737  | 0.144787 | 1 FAXC          | K12581 |
| ENSG00000235194 | 1.06257   | 2.349877  | 0.144787 | 1 PPP1R3E       | K07189 |
| ENSG00000146233 | -1.27614  | 1.268545  | 0.144797 | 1 CYP39A1       | K07439 |
| ENSG00000224934 | 1.217027  | 1.153562  | 0.144797 | 1 RP11-441O15.3 | -      |
| ENSG00000236540 | 1.217027  | 1.153562  | 0.144797 | 1 AC006547.13   | -      |
| ENSG00000169288 | -1.000405 | 3.920665  | 0.144881 | 1 MRPL1         | K02863 |
| ENSG00000198860 | -0.976155 | 5.283386  | 0.14489  | 1 TSEN15        | K15324 |
| ENSG00000161570 | -1.008591 | 3.655129  | 0.145044 | 1 CCL5          | K12499 |
| ENSG00000215417 | -1.042519 | 2.907083  | 0.145556 | 1 MIR17HG       | -      |
| ENSG00000111341 | 0.979981  | 4.864223  | 0.146195 | 1 MGP           | K19481 |
| ENSG00000173991 | 1.253461  | 0.900318  | 0.146339 | 1 TCAP          | -      |
| ENSG00000149289 | -1.003228 | 3.974535  | 0.146679 | 1 ZC3H12C       | K18668 |
| ENSG00000145819 | -0.990602 | 4.325642  | 0.146679 | 1 ARHGAP26      | K04613 |
| ENSG00000182873 | 1.277918  | 0.755369  | 0.146868 | 1 RP11-181G12.2 | -      |
| ENSG00000237380 | 1.277918  | 0.755369  | 0.146868 | 1 HOXD-AS2      | -      |
| ENSG00000232274 | 1.191338  | 0.786321  | 0.146868 | 1 RP11-782C8.2  | -      |
| ENSG00000261015 | -1.041805 | 2.752771  | 0.147358 | 1 RP1-90J20.11  | -      |
| ENSG00000264745 | 1.292368  | 0.677217  | 0.147385 | 1 RP11-403A21.2 | -      |
| ENSG00000272034 | -1.408346 | 0.708544  | 0.147866 | 1 SNORD14A      | -      |
| ENSG00000203943 | -1.36418  | 0.67786   | 0.147866 | 1 SAMD13        | -      |
| ENSG00000133818 | -1.067724 | 2.686731  | 0.148053 | 1 RRAS2         | K07830 |
| ENSG00000233264 | -1.741158 | 0.101745  | 0.148066 | 1 AC006042.8    | K12735 |
| ENSG00000107551 | 1.667396  | -0.085303 | 0.148066 | 1 RASSF4        | K09851 |
| ENSG00000133985 | 1.667396  | -0.085303 | 0.148066 | 1 TTC9          | -      |
| ENSG00000161328 | 1.478988  | -0.028006 | 0.148066 | 1 LRRC56        | K09228 |
| ENSG00000265692 | 1.478988  | -0.028006 | 0.148066 | 1 RP13-516M14.4 | -      |
| ENSG00000213366 | -1.482098 | 0.533788  | 0.14827  | 1 GSTM2         | K00799 |
| ENSG00000228889 | -1.482098 | 0.533788  | 0.14827  | 1 UBAC2-AS1     | -      |
| ENSG00000253686 | 1.348574  | 0.414603  | 0.14827  | 1 CTB-43E15.3   | -      |
| ENSG00000267424 | 1.348574  | 0.414603  | 0.14827  | 1 CTD-2265O21.3 | -      |
| ENSG00000164167 | -1.012493 | 3.376251  | 0.14837  | 1 LSM6          | K12625 |
| ENSG00000273373 | 0.998981  | 3.343535  | 0.14837  | 1 RP5-1074L1.4  | -      |
| ENSG00000249328 | -1.526942 | 0.293621  | 0.14853  | 1 RP11-26J3.1   | -      |
| ENSG00000261136 | 1.437009  | 0.095555  | 0.14853  | 1 RP11-37C7.3   | -      |

|                 |           |           |          |                 |        |
|-----------------|-----------|-----------|----------|-----------------|--------|
| ENSG00000106665 | 1.50865   | 0.271403  | 0.14853  | 1 CLIP2         | K10422 |
| ENSG00000272264 | 1.373317  | 0.315652  | 0.14853  | 1 RP11-92K15.3  | -      |
| ENSG00000141682 | -0.958482 | 6.295375  | 0.148949 | 1 PMAIP1        | K10131 |
| ENSG00000256683 | 0.999601  | 3.771373  | 0.148969 | 1 ZNF350        | K02927 |
| ENSG00000151773 | -1.119241 | 2.011008  | 0.149176 | 1 CCDC122       | K17985 |
| ENSG00000150782 | -0.956066 | 6.538382  | 0.149523 | 1 IL18          | K05482 |
| ENSG00000227184 | 1.009965  | 3.244831  | 0.149638 | 1 EPPK1         | K10388 |
| ENSG00000163435 | 0.962747  | 5.310616  | 0.150216 | 1 ELF3          | K09429 |
| ENSG00000082146 | -1.002295 | 3.49347   | 0.150298 | 1 STRADB        | K17532 |
| ENSG00000269900 | 1.036801  | 2.458085  | 0.150503 | 1 RMRP          | -      |
| ENSG00000196116 | -1.004289 | 3.206169  | 0.150781 | 1 TDRD7         | K18405 |
| ENSG00000125148 | -0.952783 | 6.580525  | 0.150946 | 1 MT2A          | K14739 |
| ENSG00000206077 | 1.073909  | 1.793248  | 0.151025 | 1 ZDHHC11B      | K18932 |
| ENSG00000173614 | -1.003717 | 3.446077  | 0.151057 | 1 NMNAT1        | K06210 |
| ENSG00000132031 | -1.166495 | 1.812724  | 0.151172 | 1 MATN3         | K19467 |
| ENSG00000245970 | -1.027937 | 2.822392  | 0.151877 | 1 KB-1208A12.3  | -      |
| ENSG00000115539 | -0.973657 | 4.353591  | 0.151992 | 1 PDCL3         | -      |
| ENSG00000119508 | 0.965288  | 4.54024   | 0.152167 | 1 NR4A3         | K08559 |
| ENSG00000197562 | 0.952287  | 5.919739  | 0.152993 | 1 RAB40C        | K07928 |
| ENSG00000110195 | 0.942312  | 9.098781  | 0.153125 | 1 FOLR1         | K13649 |
| ENSG00000141401 | 0.94316   | 7.679004  | 0.153453 | 1 IMPA2         | K01092 |
| ENSG00000162694 | -0.951727 | 5.433422  | 0.154012 | 1 EXTL2         | -      |
| ENSG00000136631 | -1.193429 | 1.653416  | 0.154099 | 1 VPS45         | K12479 |
| ENSG00000164308 | -1.093053 | 2.251851  | 0.154327 | 1 ERAP2         | K13723 |
| ENSG00000157514 | 0.944093  | 5.823467  | 0.1554   | 1 TSC22D3       | -      |
| ENSG00000260006 | 1.067145  | 2.097843  | 0.155689 | 1 RP11-469M7.1  | -      |
| ENSG00000103269 | -1.063413 | 2.594998  | 0.155702 | 1 RHBDL1        | K02857 |
| ENSG00000268621 | 0.95059   | 5.377829  | 0.155786 | 1 AC006262.5    | -      |
| ENSG00000105499 | 1.1337    | 1.438049  | 0.155983 | 1 PLA2G4C       | K16342 |
| ENSG00000237491 | 1.1337    | 1.438049  | 0.155983 | 1 RP11-206L10.9 | -      |
| ENSG00000258441 | -1.089395 | 2.125879  | 0.156428 | 1 LINC00641     | -      |
| ENSG00000154359 | -0.995771 | 3.512678  | 0.156804 | 1 LONRF1        | -      |
| ENSG00000127995 | -1.01604  | 3.092815  | 0.157104 | 1 CASD1         | -      |
| ENSG00000152518 | -0.940914 | 6.352118  | 0.15729  | 1 ZFP36L2       | K18753 |
| ENSG00000102393 | 1.036766  | 2.434015  | 0.157497 | 1 GLA           | K01189 |
| ENSG00000100003 | 0.965878  | 4.025149  | 0.157543 | 1 SEC14L2       | -      |
| ENSG00000107020 | -0.987708 | 3.619694  | 0.158036 | 1 PLGRKT        | -      |
| ENSG00000184788 | -1.03689  | 2.432515  | 0.158837 | 1 SATL1         | -      |
| ENSG00000203706 | -0.969002 | 3.968627  | 0.159256 | 1 SERTAD4-AS1   | -      |
| ENSG00000111335 | -1.168176 | 1.318236  | 0.159401 | 1 OAS2          | K14216 |
| ENSG00000162086 | -1.168176 | 1.318236  | 0.159401 | 1 ZNF75A        | K09229 |
| ENSG00000155130 | -0.931426 | 7.050736  | 0.159486 | 1 MARCKS        | K12561 |
| ENSG00000262333 | 1.036613  | 2.333562  | 0.159556 | 1 HNRNPA1P16    | K12741 |
| ENSG00000226608 | 1.07214   | 1.866607  | 0.159851 | 1 FTLP3         | K13625 |
| ENSG00000198774 | -0.984002 | 3.504815  | 0.16042  | 1 RASSF9        | K09856 |
| ENSG00000259959 | -1.217448 | 1.227876  | 0.160738 | 1 RP11-121C2.2  | -      |
| ENSG00000149131 | 0.949137  | 4.4566    | 0.160774 | 1 SERPING1      | K04001 |
| ENSG00000230551 | 0.953602  | 4.086116  | 0.161017 | 1 CTB-89H12.4   | -      |
| ENSG00000151491 | -0.960586 | 4.292363  | 0.161102 | 1 EPS8          | K17277 |
| ENSG00000006047 | 5.234787  | -1.779887 | 0.161491 | 1 YBX2          | K09277 |
| ENSG00000086506 | 5.234787  | -1.779887 | 0.161491 | 1 HBQ1          | K13827 |
| ENSG00000107736 | 5.234787  | -1.779887 | 0.161491 | 1 CDH23         | K06813 |
| ENSG00000109472 | 5.234787  | -1.779887 | 0.161491 | 1 CPE           | K01294 |
| ENSG00000110375 | 5.234787  | -1.779887 | 0.161491 | 1 UPK2          | -      |
| ENSG00000111679 | 5.234787  | -1.779887 | 0.161491 | 1 PTPN6         | K05697 |
| ENSG00000129167 | 5.234787  | -1.779887 | 0.161491 | 1 TPH1          | K00502 |
| ENSG00000130812 | 5.234787  | -1.779887 | 0.161491 | 1 ANGPTL6       | -      |
| ENSG00000137745 | 5.234787  | -1.779887 | 0.161491 | 1 MMP13         | K07994 |

|                 |          |           |          |                  |        |
|-----------------|----------|-----------|----------|------------------|--------|
| ENSG00000138769 | 5.234787 | -1.779887 | 0.161491 | 1 CDKL2          | K08824 |
| ENSG00000145491 | 5.234787 | -1.779887 | 0.161491 | 1 ROPN1L         | -      |
| ENSG00000165695 | 5.234787 | -1.779887 | 0.161491 | 1 AK8            | K00939 |
| ENSG00000167641 | 5.234787 | -1.779887 | 0.161491 | 1 PPP1R14A       | K12328 |
| ENSG00000168528 | 5.234787 | -1.779887 | 0.161491 | 1 SERINC2        | -      |
| ENSG00000177688 | 5.234787 | -1.779887 | 0.161491 | 1 SUMO4          | K12160 |
| ENSG00000182742 | 5.234787 | -1.779887 | 0.161491 | 1 HOXB4          | K09304 |
| ENSG00000183346 | 5.234787 | -1.779887 | 0.161491 | 1 C10orf107      | -      |
| ENSG00000183570 | 5.234787 | -1.779887 | 0.161491 | 1 PCBP3          | K04006 |
| ENSG00000184414 | 5.234787 | -1.779887 | 0.161491 | 1 RP11-44M6.3    | K17985 |
| ENSG00000184497 | 5.234787 | -1.779887 | 0.161491 | 1 TMEM255B       | -      |
| ENSG00000187686 | 5.234787 | -1.779887 | 0.161491 | 1 KRT18P59       | K07604 |
| ENSG00000199130 | 5.234787 | -1.779887 | 0.161491 | 1 MIR365A        | -      |
| ENSG00000199851 | 5.234787 | -1.779887 | 0.161491 | 1 U3             | -      |
| ENSG00000200120 | 5.234787 | -1.779887 | 0.161491 | 1 Y_RNA          | -      |
| ENSG00000201003 | 5.234787 | -1.779887 | 0.161491 | 1 SNORA58        | -      |
| ENSG00000201749 | 5.234787 | -1.779887 | 0.161491 | 1 Y_RNA          | -      |
| ENSG00000201793 | 5.234787 | -1.779887 | 0.161491 | 1 RN7SKP9        | -      |
| ENSG00000202415 | 5.234787 | -1.779887 | 0.161491 | 1 RN7SKP269      | -      |
| ENSG00000203364 | 5.234787 | -1.779887 | 0.161491 | 1 RP11-370F5.4   | -      |
| ENSG00000203523 | 5.234787 | -1.779887 | 0.161491 | 1 TAS2R2P        | K08474 |
| ENSG00000204220 | 5.234787 | -1.779887 | 0.161491 | 1 PFDN6          | K04798 |
| ENSG00000206674 | 5.234787 | -1.779887 | 0.161491 | 1 RNU6-945P      | -      |
| ENSG00000206881 | 5.234787 | -1.779887 | 0.161491 | 1 RNU6-190P      | -      |
| ENSG00000213761 | 5.234787 | -1.779887 | 0.161491 | 1 MT1P1          | K14739 |
| ENSG00000214659 | 5.234787 | -1.779887 | 0.161491 | 1 KRT8P26        | K07605 |
| ENSG00000216031 | 5.234787 | -1.779887 | 0.161491 | 1 MIR298         | -      |
| ENSG00000223522 | 5.234787 | -1.779887 | 0.161491 | 1 AC093690.1     | -      |
| ENSG00000224097 | 5.234787 | -1.779887 | 0.161491 | 1 RP11-472B18.1  | K14963 |
| ENSG00000225203 | 5.234787 | -1.779887 | 0.161491 | 1 TBC1D4-AS1     | -      |
| ENSG00000226917 | 5.234787 | -1.779887 | 0.161491 | 1 RP11-328M4.3   | -      |
| ENSG00000228057 | 5.234787 | -1.779887 | 0.161491 | 1 SEC63P1        | K09540 |
| ENSG00000228115 | 5.234787 | -1.779887 | 0.161491 | 1 RP11-165F24.5  | -      |
| ENSG00000228709 | 5.234787 | -1.779887 | 0.161491 | 1 AP001065.15    | -      |
| ENSG00000230628 | 5.234787 | -1.779887 | 0.161491 | 1 RP4-781K5.6    | -      |
| ENSG00000230679 | 5.234787 | -1.779887 | 0.161491 | 1 ENO1-AS1       | -      |
| ENSG00000232692 | 5.234787 | -1.779887 | 0.161491 | 1 AP001596.6     | -      |
| ENSG00000233266 | 5.234787 | -1.779887 | 0.161491 | 1 HMGB1P31       | K10802 |
| ENSG00000233799 | 5.234787 | -1.779887 | 0.161491 | 1 AC139887.4     | -      |
| ENSG00000234796 | 5.234787 | -1.779887 | 0.161491 | 1 AC113607.3     | -      |
| ENSG00000236426 | 5.234787 | -1.779887 | 0.161491 | 1 RP11-79M19.2   | -      |
| ENSG00000236658 | 5.234787 | -1.779887 | 0.161491 | 1 RP11-83J21.3   | -      |
| ENSG00000237452 | 5.234787 | -1.779887 | 0.161491 | 1 AC074212.3     | -      |
| ENSG00000238651 | 5.234787 | -1.779887 | 0.161491 | 1 snoU13         | -      |
| ENSG00000239040 | 5.234787 | -1.779887 | 0.161491 | 1 Y_RNA          | -      |
| ENSG00000239581 | 5.234787 | -1.779887 | 0.161491 | 1 RP11-19G24.1   | K02981 |
| ENSG00000240634 | 5.234787 | -1.779887 | 0.161491 | 1 RP11-1348G14.1 | K02957 |
| ENSG00000241120 | 5.234787 | -1.779887 | 0.161491 | 1 HMGN1P8        | -      |
| ENSG00000242553 | 5.234787 | -1.779887 | 0.161491 | 1 AP001432.14    | -      |
| ENSG00000244021 | 5.234787 | -1.779887 | 0.161491 | 1 RP11-50D9.1    | K02889 |
| ENSG00000244556 | 5.234787 | -1.779887 | 0.161491 | 1 ODCP           | K01581 |
| ENSG00000249664 | 5.234787 | -1.779887 | 0.161491 | 1 CTD-2227C6.2   | -      |
| ENSG00000250027 | 5.234787 | -1.779887 | 0.161491 | 1 RP11-563E2.2   | -      |
| ENSG00000250644 | 5.234787 | -1.779887 | 0.161491 | 1 RP11-295K3.1   | K01379 |
| ENSG00000250938 | 5.234787 | -1.779887 | 0.161491 | 1 RP11-679C8.2   | -      |
| ENSG00000251056 | 5.234787 | -1.779887 | 0.161491 | 1 ANKRD20A17P    | K17299 |
| ENSG00000251294 | 5.234787 | -1.779887 | 0.161491 | 1 RP11-116O11.1  | -      |
| ENSG00000252192 | 5.234787 | -1.779887 | 0.161491 | 1 SNORA9         | -      |

|                 |           |           |          |                  |        |
|-----------------|-----------|-----------|----------|------------------|--------|
| ENSG00000252465 | 5.234787  | -1.779887 | 0.161491 | 1 RMRPP3         | -      |
| ENSG00000252473 | 5.234787  | -1.779887 | 0.161491 | 1 SNORA67        | -      |
| ENSG00000253305 | 5.234787  | -1.779887 | 0.161491 | 1 PCDHGB6        | K16496 |
| ENSG00000253559 | 5.234787  | -1.779887 | 0.161491 | 1 OSGEPL1-AS1    | -      |
| ENSG00000253833 | 5.234787  | -1.779887 | 0.161491 | 1 RP11-367E12.4  | K10363 |
| ENSG00000254119 | 5.234787  | -1.779887 | 0.161491 | 1 RP11-705O24.1  | -      |
| ENSG00000255389 | 5.234787  | -1.779887 | 0.161491 | 1 C6orf3         | -      |
| ENSG00000255398 | 5.234787  | -1.779887 | 0.161491 | 1 HCAR3          | K08402 |
| ENSG00000256824 | 5.234787  | -1.779887 | 0.161491 | 1 RP11-21A7A.2   | -      |
| ENSG00000256955 | 5.234787  | -1.779887 | 0.161491 | 1 RP11-417L19.2  | -      |
| ENSG00000257802 | 5.234787  | -1.779887 | 0.161491 | 1 MRS2P2         | K16075 |
| ENSG00000257953 | 5.234787  | -1.779887 | 0.161491 | 1 RP11-620J15.1  | -      |
| ENSG00000258443 | 5.234787  | -1.779887 | 0.161491 | 1 RP3-414A15.11  | -      |
| ENSG00000259242 | 5.234787  | -1.779887 | 0.161491 | 1 AC002306.1     | -      |
| ENSG00000259709 | 5.234787  | -1.779887 | 0.161491 | 1 CTD-2184D3.7   | -      |
| ENSG00000259767 | 5.234787  | -1.779887 | 0.161491 | 1 RP11-90B9.2    | -      |
| ENSG00000260536 | 5.234787  | -1.779887 | 0.161491 | 1 RP5-1085F17.4  | -      |
| ENSG00000261442 | 5.234787  | -1.779887 | 0.161491 | 1 RP11-709D24.6  | -      |
| ENSG00000262519 | 5.234787  | -1.779887 | 0.161491 | 1 TXNP4          | K03671 |
| ENSG00000262528 | 5.234787  | -1.779887 | 0.161491 | 1 LA16c-349E10.1 | -      |
| ENSG00000263839 | 5.234787  | -1.779887 | 0.161491 | 1 CR381653.1     | -      |
| ENSG00000264290 | 5.234787  | -1.779887 | 0.161491 | 1 RP11-68I3.4    | -      |
| ENSG00000265280 | 5.234787  | -1.779887 | 0.161491 | 1 AC018804.1     | -      |
| ENSG00000265912 | 5.234787  | -1.779887 | 0.161491 | 1 RP11-583F2.2   | -      |
| ENSG00000266445 | 5.234787  | -1.779887 | 0.161491 | 1 RP13-991F5.2   | -      |
| ENSG00000266955 | 5.234787  | -1.779887 | 0.161491 | 1 RP11-820I16.3  | -      |
| ENSG00000266998 | 5.234787  | -1.779887 | 0.161491 | 1 RP11-936I5.1   | -      |
| ENSG00000267191 | 5.234787  | -1.779887 | 0.161491 | 1 RP11-15A1.2    | -      |
| ENSG00000267272 | 5.234787  | -1.779887 | 0.161491 | 1 LINC01140      | -      |
| ENSG00000267387 | 5.234787  | -1.779887 | 0.161491 | 1 CTD-2240E14.4  | -      |
| ENSG00000267412 | 5.234787  | -1.779887 | 0.161491 | 1 CTC-265F19.2   | -      |
| ENSG00000267457 | 5.234787  | -1.779887 | 0.161491 | 1 RP5-837J1.4    | -      |
| ENSG00000267938 | 5.234787  | -1.779887 | 0.161491 | 1 AC007292.1     | K03113 |
| ENSG00000268941 | 5.234787  | -1.779887 | 0.161491 | 1 MGC4294        | -      |
| ENSG00000270482 | 5.234787  | -1.779887 | 0.161491 | 1 RP11-131L12.2  | -      |
| ENSG00000271715 | 5.234787  | -1.779887 | 0.161491 | 1 CTD-2256P15.5  | -      |
| ENSG00000271755 | 5.234787  | -1.779887 | 0.161491 | 1 RP1-153G14.4   | -      |
| ENSG00000272254 | 5.234787  | -1.779887 | 0.161491 | 1 RP11-531A24.7  | -      |
| ENSG00000272955 | 5.234787  | -1.779887 | 0.161491 | 1 KB-226F1.1     | -      |
| ENSG00000273272 | 5.234787  | -1.779887 | 0.161491 | 1 CTA-384D8.34   | -      |
| ENSG00000101096 | -5.196961 | -1.349079 | 0.161491 | 1 NFATC2         | K17332 |
| ENSG00000101333 | -5.196961 | -1.349079 | 0.161491 | 1 PLCB4          | K05858 |
| ENSG00000105996 | -5.196961 | -1.349079 | 0.161491 | 1 HOXA2          | K09302 |
| ENSG00000154646 | -5.196961 | -1.349079 | 0.161491 | 1 TMPRSS15       | K01316 |
| ENSG00000160396 | -5.196961 | -1.349079 | 0.161491 | 1 HIPK4          | K08826 |
| ENSG00000163530 | -5.196961 | -1.349079 | 0.161491 | 1 DPPA2          | -      |
| ENSG00000164746 | -5.196961 | -1.349079 | 0.161491 | 1 C7orf57        | -      |
| ENSG00000165168 | -5.196961 | -1.349079 | 0.161491 | 1 CYBB           | K08008 |
| ENSG00000167861 | -5.196961 | -1.349079 | 0.161491 | 1 HID1           | -      |
| ENSG00000170681 | -5.196961 | -1.349079 | 0.161491 | 1 MURC           | K12022 |
| ENSG00000173137 | -5.196961 | -1.349079 | 0.161491 | 1 ADCK5          | K08869 |
| ENSG00000175697 | -5.196961 | -1.349079 | 0.161491 | 1 GPR156         | K04617 |
| ENSG00000175820 | -5.196961 | -1.349079 | 0.161491 | 1 CCDC168        | -      |
| ENSG00000181418 | -5.196961 | -1.349079 | 0.161491 | 1 DDN            | -      |
| ENSG00000182168 | -5.196961 | -1.349079 | 0.161491 | 1 UNC5C          | K07521 |
| ENSG00000182901 | -5.196961 | -1.349079 | 0.161491 | 1 RGS7           | K16449 |
| ENSG00000183281 | -5.196961 | -1.349079 | 0.161491 | 1 PLGLB1         | K01315 |
| ENSG00000188536 | -5.196961 | -1.349079 | 0.161491 | 1 HBA2           | K13822 |

|                 |           |           |          |                  |        |
|-----------------|-----------|-----------|----------|------------------|--------|
| ENSG00000214185 | -5.196961 | -1.349079 | 0.161491 | 1 XPOTP1         | K14288 |
| ENSG00000215023 | -5.196961 | -1.349079 | 0.161491 | 1 AC114730.5     | -      |
| ENSG00000215244 | -5.196961 | -1.349079 | 0.161491 | 1 RP11-563J2.2   | -      |
| ENSG00000224647 | -5.196961 | -1.349079 | 0.161491 | 1 AC026954.6     | K16833 |
| ENSG00000224777 | -5.196961 | -1.349079 | 0.161491 | 1 OR4F2P         | K04257 |
| ENSG00000226193 | -5.196961 | -1.349079 | 0.161491 | 1 RP3-398G3.5    | -      |
| ENSG00000229214 | -5.196961 | -1.349079 | 0.161491 | 1 LINC00242      | -      |
| ENSG00000232010 | -5.196961 | -1.349079 | 0.161491 | 1 AP001059.5     | -      |
| ENSG00000234378 | -5.196961 | -1.349079 | 0.161491 | 1 AC098828.2     | -      |
| ENSG00000234406 | -5.196961 | -1.349079 | 0.161491 | 1 AC004129.7     | K11366 |
| ENSG00000234427 | -5.196961 | -1.349079 | 0.161491 | 1 RP3-413H6.2    | -      |
| ENSG00000235989 | -5.196961 | -1.349079 | 0.161491 | 1 MORC2-AS1      | -      |
| ENSG00000236558 | -5.196961 | -1.349079 | 0.161491 | 1 AC138655.6     | -      |
| ENSG00000237198 | -5.196961 | -1.349079 | 0.161491 | 1 FAM27E1        | -      |
| ENSG00000237356 | -5.196961 | -1.349079 | 0.161491 | 1 AL163953.3     | -      |
| ENSG00000238245 | -5.196961 | -1.349079 | 0.161491 | 1 MYO5BP2        | K10357 |
| ENSG00000242798 | -5.196961 | -1.349079 | 0.161491 | 1 RP11-506M12.1  | -      |
| ENSG00000246477 | -5.196961 | -1.349079 | 0.161491 | 1 AF131216.6     | -      |
| ENSG00000246877 | -5.196961 | -1.349079 | 0.161491 | 1 DNM1P35        | -      |
| ENSG00000248479 | -5.196961 | -1.349079 | 0.161491 | 1 RP11-807H7.2   | -      |
| ENSG00000251348 | -5.196961 | -1.349079 | 0.161491 | 1 HSPD1P11       | K04077 |
| ENSG00000251442 | -5.196961 | -1.349079 | 0.161491 | 1 LINC01094      | -      |
| ENSG00000254003 | -5.196961 | -1.349079 | 0.161491 | 1 CTB-167B5.1    | -      |
| ENSG00000259687 | -5.196961 | -1.349079 | 0.161491 | 1 RP11-293M10.5  | -      |
| ENSG00000259940 | -5.196961 | -1.349079 | 0.161491 | 1 CTD-3203P2.1   | -      |
| ENSG00000266750 | -5.196961 | -1.349079 | 0.161491 | 1 MIR4645        | -      |
| ENSG00000267398 | -5.196961 | -1.349079 | 0.161491 | 1 AC006130.4     | K02917 |
| ENSG00000089558 | -4.941771 | -1.495101 | 0.161491 | 1 KCNH4          | K04907 |
| ENSG00000102879 | -4.941771 | -1.495101 | 0.161491 | 1 CORO1A         | K13882 |
| ENSG00000103942 | -4.941771 | -1.495101 | 0.161491 | 1 HOMER2         | -      |
| ENSG00000104237 | -4.941771 | -1.495101 | 0.161491 | 1 RP1            | K19538 |
| ENSG00000105792 | -4.941771 | -1.495101 | 0.161491 | 1 C7orf63        | -      |
| ENSG00000112041 | -4.941771 | -1.495101 | 0.161491 | 1 TULP1          | K19600 |
| ENSG00000119865 | -4.941771 | -1.495101 | 0.161491 | 1 CNRIP1         | -      |
| ENSG00000120160 | -4.941771 | -1.495101 | 0.161491 | 1 EQTN           | -      |
| ENSG00000128394 | -4.941771 | -1.495101 | 0.161491 | 1 APOBEC3F       | K18750 |
| ENSG00000130427 | -4.941771 | -1.495101 | 0.161491 | 1 EPO            | K05437 |
| ENSG00000130985 | -4.941771 | -1.495101 | 0.161491 | 1 UBA1           | K03178 |
| ENSG00000137968 | -4.941771 | -1.495101 | 0.161491 | 1 SLC44A5        | K15377 |
| ENSG00000142765 | -4.941771 | -1.495101 | 0.161491 | 1 SYTL1          | K17598 |
| ENSG00000149646 | -4.941771 | -1.495101 | 0.161491 | 1 CNBD2          | -      |
| ENSG00000155026 | -4.941771 | -1.495101 | 0.161491 | 1 RSPH10B        | -      |
| ENSG00000156966 | -4.941771 | -1.495101 | 0.161491 | 1 B3GNT7         | K09664 |
| ENSG00000164099 | -4.941771 | -1.495101 | 0.161491 | 1 PRSS12         | K09624 |
| ENSG00000167751 | -4.941771 | -1.495101 | 0.161491 | 1 KLK2           | K01325 |
| ENSG00000171509 | -4.941771 | -1.495101 | 0.161491 | 1 RXFP1          | K04306 |
| ENSG00000172159 | -4.941771 | -1.495101 | 0.161491 | 1 FRMD3          | -      |
| ENSG00000173705 | -4.941771 | -1.495101 | 0.161491 | 1 SUSD5          | K17985 |
| ENSG00000174353 | -4.941771 | -1.495101 | 0.161491 | 1 STAG3L3        | K13055 |
| ENSG00000178445 | -4.941771 | -1.495101 | 0.161491 | 1 GLDC           | K00281 |
| ENSG00000181123 | -4.941771 | -1.495101 | 0.161491 | 1 RP4-539M6.14   | -      |
| ENSG00000186281 | -4.941771 | -1.495101 | 0.161491 | 1 GPAT2          | K00629 |
| ENSG00000188778 | -4.941771 | -1.495101 | 0.161491 | 1 ADRB3          | K04143 |
| ENSG00000188987 | -4.941771 | -1.495101 | 0.161491 | 1 HIST1H4D       | K11254 |
| ENSG00000196862 | -4.941771 | -1.495101 | 0.161491 | 1 RGPD4          | K12172 |
| ENSG00000198515 | -4.941771 | -1.495101 | 0.161491 | 1 CNGA1          | K04948 |
| ENSG00000204929 | -4.941771 | -1.495101 | 0.161491 | 1 AC074391.1     | -      |
| ENSG00000205293 | -4.941771 | -1.495101 | 0.161491 | 1 RP11-1112C15.1 | -      |

|                 |           |           |          |                  |        |
|-----------------|-----------|-----------|----------|------------------|--------|
| ENSG00000207704 | -4.941771 | -1.495101 | 0.161491 | 1 MIR548D1       | --     |
| ENSG00000208005 | -4.941771 | -1.495101 | 0.161491 | 1 MIR503         | --     |
| ENSG00000208028 | -4.941771 | -1.495101 | 0.161491 | 1 MIR616         | --     |
| ENSG00000223656 | -4.941771 | -1.495101 | 0.161491 | 1 HMGB3P10       | K11296 |
| ENSG00000224152 | -4.941771 | -1.495101 | 0.161491 | 1 AC009506.1     | --     |
| ENSG00000227603 | -4.941771 | -1.495101 | 0.161491 | 1 RP11-165J3.6   | --     |
| ENSG00000228126 | -4.941771 | -1.495101 | 0.161491 | 1 LINC00568      | --     |
| ENSG00000228606 | -4.941771 | -1.495101 | 0.161491 | 1 RP11-574F21.2  | --     |
| ENSG00000229766 | -4.941771 | -1.495101 | 0.161491 | 1 RP5-971N18.3   | --     |
| ENSG00000229870 | -4.941771 | -1.495101 | 0.161491 | 1 RP11-507K13.6  | K02889 |
| ENSG00000230212 | -4.941771 | -1.495101 | 0.161491 | 1 AP000688.14    | --     |
| ENSG00000230732 | -4.941771 | -1.495101 | 0.161491 | 1 AC127904.2     | --     |
| ENSG00000231811 | -4.941771 | -1.495101 | 0.161491 | 1 RP3-527G5.1    | --     |
| ENSG00000233672 | -4.941771 | -1.495101 | 0.161491 | 1 RNASEH2B-AS1   | --     |
| ENSG00000233847 | -4.941771 | -1.495101 | 0.161491 | 1 AC104113.3     | --     |
| ENSG00000234535 | -4.941771 | -1.495101 | 0.161491 | 1 RP11-37L2.1    | --     |
| ENSG00000235670 | -4.941771 | -1.495101 | 0.161491 | 1 RPL21P40       | K02889 |
| ENSG00000235721 | -4.941771 | -1.495101 | 0.161491 | 1 AC013268.3     | --     |
| ENSG00000235978 | -4.941771 | -1.495101 | 0.161491 | 1 AC018816.3     | --     |
| ENSG00000237061 | -4.941771 | -1.495101 | 0.161491 | 1 RP11-956J14.1  | --     |
| ENSG00000237361 | -4.941771 | -1.495101 | 0.161491 | 1 LINC01071      | --     |
| ENSG00000237689 | -4.941771 | -1.495101 | 0.161491 | 1 AC007064.24    | --     |
| ENSG00000239353 | -4.941771 | -1.495101 | 0.161491 | 1 RP11-492E3.51  | --     |
| ENSG00000239731 | -4.941771 | -1.495101 | 0.161491 | 1 RN7SL825P      | --     |
| ENSG00000239815 | -4.941771 | -1.495101 | 0.161491 | 1 RP11-309L24.4  | --     |
| ENSG00000240057 | -4.941771 | -1.495101 | 0.161491 | 1 RP11-572M11.4  | --     |
| ENSG00000242575 | -4.941771 | -1.495101 | 0.161491 | 1 AC012501.3     | K07374 |
| ENSG00000243024 | -4.941771 | -1.495101 | 0.161491 | 1 RPS11P6        | --     |
| ENSG00000244198 | -4.941771 | -1.495101 | 0.161491 | 1 RP4-545C24.1   | --     |
| ENSG00000244393 | -4.941771 | -1.495101 | 0.161491 | 1 RP11-592B15.3  | --     |
| ENSG00000245281 | -4.941771 | -1.495101 | 0.161491 | 1 CTD-2547L16.1  | --     |
| ENSG00000248280 | -4.941771 | -1.495101 | 0.161491 | 1 RP11-33B1.2    | K13051 |
| ENSG00000248949 | -4.941771 | -1.495101 | 0.161491 | 1 RP11-661C8.2   | --     |
| ENSG00000250654 | -4.941771 | -1.495101 | 0.161491 | 1 RP11-834C11.7  | --     |
| ENSG00000250948 | -4.941771 | -1.495101 | 0.161491 | 1 RP11-1079K10.2 | --     |
| ENSG00000251400 | -4.941771 | -1.495101 | 0.161491 | 1 ALDH7A1P1      | K14085 |
| ENSG00000251402 | -4.941771 | -1.495101 | 0.161491 | 1 FAM90A25P      | --     |
| ENSG00000253213 | -4.941771 | -1.495101 | 0.161491 | 1 RP11-546B8.3   | K11842 |
| ENSG00000253398 | -4.941771 | -1.495101 | 0.161491 | 1 RP11-775B15.2  | --     |
| ENSG00000255650 | -4.941771 | -1.495101 | 0.161491 | 1 FAM222A-AS1    | --     |
| ENSG00000256377 | -4.941771 | -1.495101 | 0.161491 | 1 RP11-1060J15.4 | --     |
| ENSG00000257464 | -4.941771 | -1.495101 | 0.161491 | 1 RP11-161H23.8  | K11299 |
| ENSG00000259022 | -4.941771 | -1.495101 | 0.161491 | 1 DNAJC8P1       | K09528 |
| ENSG00000259211 | -4.941771 | -1.495101 | 0.161491 | 1 RP11-64K12.8   | --     |
| ENSG00000259216 | -4.941771 | -1.495101 | 0.161491 | 1 RP11-227D13.2  | --     |
| ENSG00000260095 | -4.941771 | -1.495101 | 0.161491 | 1 RP11-715J22.3  | --     |
| ENSG00000260877 | -4.941771 | -1.495101 | 0.161491 | 1 RP11-211G23.2  | --     |
| ENSG00000261122 | -4.941771 | -1.495101 | 0.161491 | 1 5S_rRNA        | --     |
| ENSG00000261513 | -4.941771 | -1.495101 | 0.161491 | 1 RP11-432I5.8   | --     |
| ENSG00000262728 | -4.941771 | -1.495101 | 0.161491 | 1 AC123768.4     | --     |
| ENSG00000263842 | -4.941771 | -1.495101 | 0.161491 | 1 AC104986.1     | --     |
| ENSG00000266495 | -4.941771 | -1.495101 | 0.161491 | 1 RP11-17J14.2   | --     |
| ENSG00000266896 | -4.941771 | -1.495101 | 0.161491 | 1 RP1-266L20.9   | --     |
| ENSG00000267607 | -4.941771 | -1.495101 | 0.161491 | 1 CTD-2369P2.8   | --     |
| ENSG00000269949 | -4.941771 | -1.495101 | 0.161491 | 1 RP11-738E22.3  | --     |
| ENSG00000270168 | -4.941771 | -1.495101 | 0.161491 | 1 LA16c-380H5.4  | --     |
| ENSG00000270177 | -4.941771 | -1.495101 | 0.161491 | 1 CTD-2410N18.3  | --     |
| ENSG00000271500 | -4.941771 | -1.495101 | 0.161491 | 1 RP11-288K12.1  | K14856 |

|                 |           |           |          |                 |        |
|-----------------|-----------|-----------|----------|-----------------|--------|
| ENSG00000272223 | -4.941771 | -1.495101 | 0.161491 | 1 RP1-20C7.6    | -      |
| ENSG00000272544 | -4.941771 | -1.495101 | 0.161491 | 1 CTA-357J21.1  | -      |
| ENSG00000272844 | -4.941771 | -1.495101 | 0.161491 | 1 RP11-484K9.4  | -      |
| ENSG00000272858 | -4.941771 | -1.495101 | 0.161491 | 1 CTA-292E10.8  | -      |
| ENSG00000273116 | -4.941771 | -1.495101 | 0.161491 | 1 LLfos-48D6.1  | -      |
| ENSG00000273485 | -4.941771 | -1.495101 | 0.161491 | 1 RP11-225H22.7 | -      |
| ENSG00000112186 | -0.940976 | 4.908921  | 0.161523 | 1 CAP2          | K17261 |
| ENSG00000170271 | 1.036437  | 2.225693  | 0.161941 | 1 FAXDC2        | K07750 |
| ENSG00000254667 | 0.945277  | 4.395197  | 0.162191 | 1 AP000783.1    | -      |
| ENSG00000129317 | -0.956724 | 4.134537  | 0.162671 | 1 PUS7L         | K06176 |
| ENSG00000235162 | -0.965161 | 3.806127  | 0.163061 | 1 C12orf75      | -      |
| ENSG00000125848 | -1.210038 | 1.08637   | 0.163786 | 1 FLRT3         | K16362 |
| ENSG00000249459 | -1.210038 | 1.08637   | 0.163786 | 1 ZNF286B       | K09228 |
| ENSG00000261762 | -1.210038 | 1.08637   | 0.163786 | 1 RP11-650L12.2 | -      |
| ENSG00000263826 | -1.210038 | 1.08637   | 0.163786 | 1 RP11-573D15.9 | -      |
| ENSG00000144724 | -1.176225 | 1.063208  | 0.163786 | 1 PTPRG         | K16667 |
| ENSG00000272338 | -1.176225 | 1.063208  | 0.163786 | 1 RP11-722E23.2 | -      |
| ENSG00000187091 | 1.176162  | 0.928129  | 0.163786 | 1 PLCD1         | K05857 |
| ENSG00000243156 | 0.933565  | 4.89872   | 0.164195 | 1 MICAL3        | -      |
| ENSG00000173546 | 0.9188    | 6.989561  | 0.16488  | 1 CSPG4         | K08115 |
| ENSG00000114315 | -0.940412 | 4.704589  | 0.165189 | 1 HES1          | K06054 |
| ENSG00000095370 | 1.183352  | 0.858916  | 0.165529 | 1 SH2D3C        | -      |
| ENSG00000166592 | 1.183352  | 0.858916  | 0.165529 | 1 RRAD          | K07845 |
| ENSG00000147383 | 0.983639  | 2.872452  | 0.165999 | 1 NSDHL         | K07748 |
| ENSG00000138166 | -0.921949 | 5.996899  | 0.16637  | 1 DUSP5         | K04459 |
| ENSG00000178172 | 0.926515  | 4.919256  | 0.166378 | 1 SPINK6        | -      |
| ENSG00000233077 | 1.127603  | 1.530906  | 0.166992 | 1 RP11-290F20.2 | -      |
| ENSG00000253785 | -1.352998 | 0.864023  | 0.167446 | 1 CTC-308K20.3  | K01507 |
| ENSG00000134376 | -0.966166 | 3.492934  | 0.16791  | 1 CRB1          | K16681 |
| ENSG00000234287 | 0.924603  | 4.718198  | 0.169136 | 1 RP11-761N21.2 | K02978 |
| ENSG00000099958 | 1.21029   | 0.629559  | 0.169557 | 1 DERL3         | K13989 |
| ENSG00000244586 | 1.21029   | 0.629559  | 0.169557 | 1 WNT5A-AS1     | -      |
| ENSG00000157216 | 0.916199  | 5.703499  | 0.16956  | 1 SSBP3         | -      |
| ENSG00000114480 | 0.914569  | 5.824209  | 0.169764 | 1 GBE1          | K00700 |
| ENSG00000139194 | 1.084926  | 1.408653  | 0.170178 | 1 RBP5          | -      |
| ENSG00000127920 | -0.907772 | 7.007695  | 0.170246 | 1 GNG11         | K04546 |
| ENSG00000253981 | -0.966525 | 3.39645   | 0.17095  | 1 ALG1L13P      | K03842 |
| ENSG00000142207 | 0.906533  | 6.403372  | 0.171686 | 1 URB1          | K14861 |
| ENSG00000146197 | 1.327252  | 0.507388  | 0.171886 | 1 SCUBE3        | -      |
| ENSG00000199133 | 1.327252  | 0.507388  | 0.171886 | 1 MIRLET7D      | -      |
| ENSG00000225880 | 1.221653  | 0.544525  | 0.171886 | 1 LINC00115     | -      |
| ENSG00000226332 | -1.17804  | 1.439111  | 0.171981 | 1 RP11-157P1.4  | -      |
| ENSG00000116761 | 0.903943  | 6.676488  | 0.172055 | 1 CTH           | K01758 |
| ENSG00000085063 | 0.899938  | 9.042192  | 0.172165 | 1 CD59          | K04008 |
| ENSG00000123384 | 0.901808  | 7.456672  | 0.172195 | 1 LRP1          | K04550 |
| ENSG00000165389 | 0.900794  | 7.565512  | 0.172573 | 1 SPTSSA        | K01353 |
| ENSG00000137502 | 0.905244  | 6.152897  | 0.172685 | 1 RAB30         | K07917 |
| ENSG00000128422 | 0.89807   | 10.31497  | 0.172777 | 1 KRT17         | K07604 |
| ENSG00000070182 | 0.956051  | 3.004671  | 0.17281  | 1 SPTB          | K06115 |
| ENSG00000227036 | 0.956051  | 3.004671  | 0.17281  | 1 LINC00511     | -      |
| ENSG00000160766 | -0.991771 | 2.677916  | 0.172973 | 1 GBAP1         | K01201 |
| ENSG00000120211 | 0.933475  | 3.640892  | 0.17318  | 1 INSL4         | K05255 |
| ENSG00000138061 | -0.899357 | 7.68574   | 0.173356 | 1 CYP1B1        | K07410 |
| ENSG00000230177 | 1.074865  | 1.755149  | 0.1736   | 1 RP5-1112D6.4  | -      |
| ENSG00000168702 | 1.035518  | 1.769852  | 0.1736   | 1 LRP1B         | -      |
| ENSG00000255414 | 1.090319  | 1.254434  | 0.173951 | 1 LINC01059     | -      |
| ENSG00000272341 | 1.090319  | 1.254434  | 0.173951 | 1 RP1-151F17.2  | -      |
| ENSG00000196437 | -1.431769 | 0.498804  | 0.174456 | 1 ZNF569        | K09228 |



|                 |           |           |          |                 |        |
|-----------------|-----------|-----------|----------|-----------------|--------|
| ENSG00000229666 | -1.431769 | 0.498804  | 0.174456 | 1 MAST4-AS1     | -      |
| ENSG00000220749 | 1.249598  | 0.358371  | 0.174456 | 1 RPL21P28      | K02889 |
| ENSG00000259328 | 1.249598  | 0.358371  | 0.174456 | 1 RP11-152F13.7 | K08622 |
| ENSG00000064205 | 0.895785  | 8.193043  | 0.174489 | 1 WISP2         | K06827 |
| ENSG00000230715 | 0.985237  | 2.352613  | 0.174694 | 1 RP11-274B21.4 | -      |
| ENSG00000215039 | 1.035327  | 1.691453  | 0.175242 | 1 CD27-AS1      | -      |
| ENSG00000251192 | -1.057745 | 2.104366  | 0.175703 | 1 ZNF674        | K09228 |
| ENSG00000100342 | -0.923043 | 4.280899  | 0.176497 | 1 APOL1         | K14480 |
| ENSG00000213672 | 0.904731  | 5.088006  | 0.176803 | 1 NCKIPSD       | -      |
| ENSG00000236901 | 0.957113  | 2.708546  | 0.176873 | 1 MIR600HG      | -      |
| ENSG00000261780 | 0.967758  | 2.507298  | 0.177002 | 1 CTD-2354A18.1 | -      |
| ENSG00000243137 | 0.918362  | 4.365793  | 0.177018 | 1 PSG4          | K06500 |
| ENSG00000141429 | -0.895703 | 6.267455  | 0.177049 | 1 GALNT1        | K00710 |
| ENSG00000107859 | 1.035985  | 1.982731  | 0.177117 | 1 PITX3         | K09357 |
| ENSG00000097096 | -0.938924 | 3.650743  | 0.177248 | 1 SYDE2         | K17985 |
| ENSG00000204957 | 1.40238   | 0.20966   | 0.177284 | 1 AC006486.1    | K17985 |
| ENSG00000272525 | 1.40238   | 0.20966   | 0.177284 | 1 RP11-79P5.9   | -      |
| ENSG00000110492 | 1.267047  | 0.255801  | 0.177284 | 1 MDK           | K06828 |
| ENSG00000146090 | 1.267047  | 0.255801  | 0.177284 | 1 RASGEF1C      | -      |
| ENSG00000259146 | 1.267047  | 0.255801  | 0.177284 | 1 RP1-261D10.2  | -      |
| ENSG00000262903 | 1.267047  | 0.255801  | 0.177284 | 1 RP11-235E17.6 | -      |
| ENSG00000270195 | 1.267047  | 0.255801  | 0.177284 | 1 RP11-572O17.1 | -      |
| ENSG00000271119 | 1.267047  | 0.255801  | 0.177284 | 1 CTD-2012J19.3 | -      |
| ENSG00000273449 | 1.267047  | 0.255801  | 0.177284 | 1 RP11-218F10.3 | -      |
| ENSG00000172469 | -0.934605 | 3.400088  | 0.178845 | 1 MANEA         | K15538 |
| ENSG00000204941 | 0.897299  | 5.164889  | 0.178876 | 1 PSG5          | K06500 |
| ENSG00000127415 | -0.969998 | 2.704559  | 0.178885 | 1 IDUA          | K14700 |
| ENSG00000143850 | -0.983778 | 2.494774  | 0.179309 | 1 PLEKHA6       | -      |
| ENSG00000156313 | -0.967693 | 3.122374  | 0.18032  | 1 RPGR          | K19607 |
| ENSG00000206754 | -1.465978 | 0.251663  | 0.180372 | 1 SNORD101      | -      |
| ENSG00000151164 | -1.402324 | 0.208302  | 0.180372 | 1 RAD9B         | K10995 |
| ENSG00000180479 | -1.402324 | 0.208302  | 0.180372 | 1 ZNF571        | K09228 |
| ENSG00000186377 | -1.402324 | 0.208302  | 0.180372 | 1 CYP4X1        | K07428 |
| ENSG00000198040 | -1.402324 | 0.208302  | 0.180372 | 1 ZNF84         | K09228 |
| ENSG00000131037 | -1.049841 | 1.963766  | 0.1804   | 1 EPS8L1        | K17277 |
| ENSG00000260001 | -1.049841 | 1.963766  | 0.1804   | 1 TGFBR3L       | K15209 |
| ENSG00000155729 | -1.009633 | 2.46397   | 0.180548 | 1 KCTD18        | -      |
| ENSG00000125246 | -0.99716  | 2.455596  | 0.180548 | 1 CLYBL         | K11390 |
| ENSG00000268032 | 1.081918  | 1.503199  | 0.180992 | 1 CTB-52I2.4    | K01647 |
| ENSG00000119227 | 1.034872  | 1.520929  | 0.180992 | 1 PIGZ          | K08098 |
| ENSG00000100968 | 1.169654  | 0.994261  | 0.181118 | 1 NFATC4        | K17334 |
| ENSG00000128965 | -0.909143 | 4.271776  | 0.181237 | 1 CHAC1         | K07232 |
| ENSG00000084764 | 0.940503  | 2.755181  | 0.181468 | 1 MAPRE3        | K10436 |
| ENSG00000027869 | -0.970549 | 2.621316  | 0.182243 | 1 SH2D2A        | K08273 |
| ENSG00000174799 | -0.959824 | 3.055231  | 0.182902 | 1 CEP135        | K16461 |
| ENSG00000168274 | 1.083371  | 1.456682  | 0.183242 | 1 HIST1H2AE     | K11251 |
| ENSG00000073464 | -1.671341 | 0.053334  | 0.183672 | 1 CLCN4         | K05012 |
| ENSG00000139344 | -1.671341 | 0.053334  | 0.183672 | 1 AMDHD1        | K01468 |
| ENSG00000258791 | -1.671341 | 0.053334  | 0.183672 | 1 LINC00520     | -      |
| ENSG00000266278 | -1.671341 | 0.053334  | 0.183672 | 1 RP11-41O4.2   | -      |
| ENSG00000240975 | -1.597974 | 0.003052  | 0.183672 | 1 RP11-313M3.1  | K02883 |
| ENSG00000254184 | -1.597974 | 0.003052  | 0.183672 | 1 TYW1B         | K15449 |
| ENSG00000128918 | 1.530958  | -0.162726 | 0.183672 | 1 ALDH1A2       | K09877 |
| ENSG00000174871 | 1.530958  | -0.162726 | 0.183672 | 1 CNIH2         | -      |
| ENSG00000225032 | 1.530958  | -0.162726 | 0.183672 | 1 RP11-228B15.4 | -      |
| ENSG00000239617 | 1.530958  | -0.162726 | 0.183672 | 1 RP11-302B13.1 | K02912 |
| ENSG00000226268 | 1.342549  | -0.102376 | 0.183672 | 1 RP11-61N20.3  | K15116 |
| ENSG00000261798 | 1.342549  | -0.102376 | 0.183672 | 1 RP1-118J21.25 | -      |

|                  |           |           |          |                 |        |
|------------------|-----------|-----------|----------|-----------------|--------|
| ENSG00000104883  | 0.946684  | 2.849261  | 0.183742 | 1 PEX11G        | K13353 |
| ENSG00000014123  | -0.89874  | 4.415883  | 0.184063 | 1 UFL1          | -      |
| ENSG000000251003 | -1.016707 | 1.868626  | 0.184097 | 1 RP11-152P17.2 | -      |
| ENSG00000080031  | 0.907013  | 3.987413  | 0.184538 | 1 PTPRH         | K18034 |
| ENSG000000119699 | 0.983255  | 2.300432  | 0.184662 | 1 TGFB3         | K13377 |
| ENSG000000124813 | -0.983031 | 2.540841  | 0.184745 | 1 RUNX2         | K09278 |
| ENSG000000028116 | -0.892213 | 5.02473   | 0.185022 | 1 VRK2          | K08816 |
| ENSG000000128710 | 0.927371  | 3.40827   | 0.185413 | 1 HOXD10        | K09295 |
| ENSG000000182985 | -0.895732 | 4.276198  | 0.185685 | 1 CADM1         | K06781 |
| ENSG000000261324 | -1.088774 | 1.483589  | 0.185698 | 1 RP11-174G6.5  | -      |
| ENSG000000143486 | 0.996078  | 1.746125  | 0.186153 | 1 EIF2D         | K15027 |
| ENSG000000101986 | 0.954238  | 2.256512  | 0.186184 | 1 ABCD1         | K05675 |
| ENSG000000260328 | -1.041655 | 2.093476  | 0.186235 | 1 RP11-416I2.1  | -      |
| ENSG000000146733 | -0.884244 | 5.499601  | 0.18631  | 1 PSPH          | K01079 |
| ENSG000000196557 | 0.927238  | 3.048411  | 0.186596 | 1 CACNA1H       | K04855 |
| ENSG000000188707 | 0.951096  | 2.920385  | 0.18678  | 1 ZBED6CL       | -      |
| ENSG00000006611  | 1.597018  | -0.310821 | 0.187026 | 1 USH1C         | -      |
| ENSG000000172748 | 1.597018  | -0.310821 | 0.187026 | 1 ZNF596        | K09228 |
| ENSG000000215712 | 1.597018  | -0.310821 | 0.187026 | 1 TMEM242       | -      |
| ENSG000000222493 | 1.597018  | -0.310821 | 0.187026 | 1 Y_RNA         | -      |
| ENSG000000224882 | 1.597018  | -0.310821 | 0.187026 | 1 IKBKGP1       | K07210 |
| ENSG000000237976 | 1.597018  | -0.310821 | 0.187026 | 1 RP11-126K1.6  | -      |
| ENSG000000253330 | 1.597018  | -0.310821 | 0.187026 | 1 RP11-697N18.3 | K14012 |
| ENSG000000255142 | 1.597018  | -0.310821 | 0.187026 | 1 AP006621.6    | -      |
| ENSG000000255559 | 1.597018  | -0.310821 | 0.187026 | 1 ZNF252P-AS1   | -      |
| ENSG000000150051 | -0.923257 | 3.660952  | 0.187118 | 1 MKX           | -      |
| ENSG000000115525 | -0.970265 | 2.663544  | 0.187227 | 1 ST3GAL5       | K03370 |
| ENSG00000078596  | -1.200741 | 0.928838  | 0.187314 | 1 ITM2A         | K18241 |
| ENSG000000128512 | -0.971518 | 2.486583  | 0.187495 | 1 DOCK4         | K17697 |
| ENSG000000108821 | 0.873247  | 6.107572  | 0.188267 | 1 COL1A1        | K06236 |
| ENSG000000063127 | 1.034282  | 1.328144  | 0.188387 | 1 SLC6A16       | K05048 |
| ENSG000000182263 | -0.924949 | 3.265193  | 0.188824 | 1 FIGN          | -      |
| ENSG000000105997 | -1.727846 | -0.364898 | 0.189984 | 1 HOXA3         | K09303 |
| ENSG000000233483 | -1.727846 | -0.364898 | 0.189984 | 1 CTD-2020K17.4 | -      |
| ENSG000000258682 | -1.727846 | -0.364898 | 0.189984 | 1 CTD-2002H8.2  | -      |
| ENSG000000261712 | -1.727846 | -0.364898 | 0.189984 | 1 RP11-358L4.1  | -      |
| ENSG000000264885 | -1.727846 | -0.364898 | 0.189984 | 1 RP11-815I9.4  | -      |
| ENSG00000015520  | 1.493347  | -0.574178 | 0.189984 | 1 NPC1L1        | K14461 |
| ENSG000000120693 | 1.493347  | -0.574178 | 0.189984 | 1 SMAD9         | K16791 |
| ENSG000000149634 | 1.493347  | -0.574178 | 0.189984 | 1 SPATA25       | -      |
| ENSG000000165716 | 1.493347  | -0.574178 | 0.189984 | 1 FAM69B        | -      |
| ENSG000000197681 | 1.493347  | -0.574178 | 0.189984 | 1 TBC1D3        | K11837 |
| ENSG000000214439 | 1.493347  | -0.574178 | 0.189984 | 1 FAM185BP      | -      |
| ENSG000000223486 | 1.493347  | -0.574178 | 0.189984 | 1 AC092198.1    | -      |
| ENSG000000225950 | 1.493347  | -0.574178 | 0.189984 | 1 NTF4          | K12457 |
| ENSG000000227344 | 1.493347  | -0.574178 | 0.189984 | 1 HAUS6P1       | K16589 |
| ENSG000000228852 | 1.493347  | -0.574178 | 0.189984 | 1 RP11-57H12.5  | -      |
| ENSG000000235865 | 1.493347  | -0.574178 | 0.189984 | 1 GSN-AS1       | -      |
| ENSG000000239002 | 1.493347  | -0.574178 | 0.189984 | 1 SCARNA10      | -      |
| ENSG000000242078 | 1.493347  | -0.574178 | 0.189984 | 1 RP11-738B7.1  | -      |
| ENSG000000243988 | 1.493347  | -0.574178 | 0.189984 | 1 RPS24P17      | K02974 |
| ENSG000000244617 | 1.493347  | -0.574178 | 0.189984 | 1 ASPRV1        | -      |
| ENSG000000261008 | 1.493347  | -0.574178 | 0.189984 | 1 AC004158.2    | -      |
| ENSG000000261560 | 1.493347  | -0.574178 | 0.189984 | 1 RP11-166B2.3  | -      |
| ENSG000000271659 | 1.493347  | -0.574178 | 0.189984 | 1 RP11-435O5.4  | -      |
| ENSG000000198517 | 0.872238  | 5.447113  | 0.190392 | 1 MAFK          | K09037 |
| ENSG000000167106 | 0.86926   | 6.088927  | 0.190438 | 1 FAM102A       | -      |
| ENSG000000188739 | -1.023472 | 1.715308  | 0.190766 | 1 RBM34         | K14837 |

|                 |           |           |          |                  |        |
|-----------------|-----------|-----------|----------|------------------|--------|
| ENSG00000163220 | 0.99226   | 1.625026  | 0.190766 | 1 S100A9         | -      |
| ENSG00000110446 | -1.313651 | 0.836713  | 0.190995 | 1 SLC15A3        | K14638 |
| ENSG00000128298 | -1.273201 | 0.808813  | 0.190995 | 1 BAIAP2L2       | -      |
| ENSG00000161921 | 1.200259  | 0.710002  | 0.190995 | 1 CXCL16         | K10035 |
| ENSG00000230673 | 1.200259  | 0.710002  | 0.190995 | 1 PABPC1P3       | K13126 |
| ENSG00000205413 | -0.877217 | 5.231902  | 0.191049 | 1 SAMD9          | -      |
| ENSG00000185973 | -2.328955 | -0.684716 | 0.191276 | 1 TMLHE          | K00474 |
| ENSG00000048052 | -2.328955 | -0.684716 | 0.191276 | 1 HDAC9          | K11409 |
| ENSG00000197599 | -2.328955 | -0.684716 | 0.191276 | 1 CCDC154        | -      |
| ENSG00000200127 | -2.328955 | -0.684716 | 0.191276 | 1 Y_RNA          | -      |
| ENSG00000212304 | -2.328955 | -0.684716 | 0.191276 | 1 SNORD12        | -      |
| ENSG00000213204 | -2.328955 | -0.684716 | 0.191276 | 1 C6orf165       | K15272 |
| ENSG00000225051 | -2.328955 | -0.684716 | 0.191276 | 1 HMGB3P22       | K11296 |
| ENSG00000227375 | -2.328955 | -0.684716 | 0.191276 | 1 DLG1-AS1       | -      |
| ENSG00000235601 | -2.328955 | -0.684716 | 0.191276 | 1 RP11-231K24.2  | -      |
| ENSG00000236773 | -2.328955 | -0.684716 | 0.191276 | 1 RP11-365O16.1  | -      |
| ENSG00000237276 | -2.328955 | -0.684716 | 0.191276 | 1 ANO7P1         | -      |
| ENSG00000268964 | -2.328955 | -0.684716 | 0.191276 | 1 ERVV-2         | -      |
| ENSG00000272523 | -2.328955 | -0.684716 | 0.191276 | 1 LINC01023      | -      |
| ENSG00000100079 | 1.979737  | -0.871035 | 0.191276 | 1 LGALS2         | K10090 |
| ENSG00000108309 | 1.979737  | -0.871035 | 0.191276 | 1 RUNDC3A        | K11447 |
| ENSG00000128656 | 1.979737  | -0.871035 | 0.191276 | 1 CHN1           | -      |
| ENSG00000132334 | 1.979737  | -0.871035 | 0.191276 | 1 PTPRE          | K18033 |
| ENSG00000137843 | 1.979737  | -0.871035 | 0.191276 | 1 PAK6           | K05735 |
| ENSG00000183055 | 1.979737  | -0.871035 | 0.191276 | 1 FAM133CP       | -      |
| ENSG00000189129 | 1.979737  | -0.871035 | 0.191276 | 1 PLAC9          | -      |
| ENSG00000197768 | 1.979737  | -0.871035 | 0.191276 | 1 C9orf173       | -      |
| ENSG00000203392 | 1.979737  | -0.871035 | 0.191276 | 1 AC105020.1     | K04613 |
| ENSG00000205696 | 1.979737  | -0.871035 | 0.191276 | 1 ADARB2-AS1     | -      |
| ENSG00000225234 | 1.979737  | -0.871035 | 0.191276 | 1 TRAPPC12-AS1   | -      |
| ENSG00000226088 | 1.979737  | -0.871035 | 0.191276 | 1 RP11-180O5.2   | -      |
| ENSG00000228205 | 1.979737  | -0.871035 | 0.191276 | 1 RP11-778D9.4   | K02985 |
| ENSG00000231908 | 1.979737  | -0.871035 | 0.191276 | 1 IDH1-AS1       | -      |
| ENSG00000235888 | 1.979737  | -0.871035 | 0.191276 | 1 AF064858.8     | -      |
| ENSG00000261819 | 1.979737  | -0.871035 | 0.191276 | 1 RP11-680G24.4  | -      |
| ENSG00000264278 | 1.979737  | -0.871035 | 0.191276 | 1 RP11-162A12.2  | K12756 |
| ENSG00000265791 | 1.979737  | -0.871035 | 0.191276 | 1 CTD-2349P21.10 | -      |
| ENSG00000268470 | 1.979737  | -0.871035 | 0.191276 | 1 DNAH17-AS1     | K10408 |
| ENSG00000271997 | 1.979737  | -0.871035 | 0.191276 | 1 RP11-97O12.6   | -      |
| ENSG00000272279 | 1.979737  | -0.871035 | 0.191276 | 1 RP11-157J24.2  | -      |
| ENSG0000023445  | -0.877433 | 4.702655  | 0.192019 | 1 BIRC3          | K16060 |
| ENSG00000176171 | 0.861019  | 7.127989  | 0.192505 | 1 BNIP3          | K15464 |
| ENSG00000180801 | -0.89753  | 3.887451  | 0.193197 | 1 ARSJ           | K12375 |
| ENSG00000136161 | -1.081009 | 1.25889   | 0.194613 | 1 RCBTB2         | K11494 |
| ENSG00000273002 | 1.033711  | 1.165088  | 0.194613 | 1 RP11-336K24.12 | -      |
| ENSG00000137959 | -0.959391 | 2.656299  | 0.194796 | 1 IFI44L         | -      |
| ENSG00000153048 | 0.856104  | 7.175341  | 0.194965 | 1 CARHSP1        | -      |
| ENSG00000152348 | -0.899871 | 3.327182  | 0.19502  | 1 ATG10          | K17888 |
| ENSG00000261211 | 0.941244  | 2.051365  | 0.195242 | 1 RP1-80N2.3     | -      |
| ENSG00000111358 | -0.864698 | 5.441466  | 0.195319 | 1 GTF2H3         | K03143 |
| ENSG00000232956 | -0.861758 | 5.717035  | 0.195495 | 1 SNHG15         | -      |
| ENSG00000116661 | 0.856016  | 6.47971   | 0.195616 | 1 FBXO2          | K10099 |
| ENSG00000143819 | 0.859285  | 5.595609  | 0.195952 | 1 EPHX1          | K01253 |
| ENSG00000070669 | -0.853084 | 7.409462  | 0.196517 | 1 ASNS           | K01953 |
| ENSG00000105856 | 0.856813  | 6.048234  | 0.196647 | 1 HBP1           | K09228 |
| ENSG00000065717 | 0.8575    | 5.957636  | 0.197079 | 1 TLE2           | -      |
| ENSG00000154734 | -0.888393 | 3.792668  | 0.197905 | 1 ADAMTS1        | K08617 |
| ENSG00000168234 | 0.853697  | 5.991928  | 0.198186 | 1 TTC39C         | -      |

|                 |           |          |          |                  |        |
|-----------------|-----------|----------|----------|------------------|--------|
| ENSG00000172260 | -1.124674 | 1.164368 | 0.198245 | 1 NEGR1          | K06775 |
| ENSG00000244968 | -1.124674 | 1.164368 | 0.198245 | 1 LIFR-AS1       | -      |
| ENSG00000158555 | 0.857157  | 5.443074 | 0.198995 | 1 GDPD5          | K01124 |
| ENSG00000272667 | 1.034597  | 1.427672 | 0.199277 | 1 RP11-395A13.2  | -      |
| ENSG00000134215 | 0.853995  | 5.826465 | 0.199517 | 1 VAV3           | K05730 |
| ENSG00000250461 | -1.019896 | 1.794038 | 0.199632 | 1 RP11-631M6.2   | -      |
| ENSG00000182621 | -1.271574 | 0.614213 | 0.199929 | 1 PLCB1          | K05858 |
| ENSG00000205559 | -1.271574 | 0.614213 | 0.199929 | 1 CHKB-AS1       | -      |
| ENSG00000265678 | -1.271574 | 0.614213 | 0.199929 | 1 RP11-1376P16.2 | -      |
| ENSG00000164674 | 1.234632  | 0.454348 | 0.199929 | 1 SYTL3          | K17598 |
| ENSG00000196338 | 1.234632  | 0.454348 | 0.199929 | 1 NLGN3          | K07378 |
| ENSG00000228544 | 1.234632  | 0.454348 | 0.199929 | 1 CCDC183-AS1    | -      |
| ENSG00000270673 | 1.234632  | 0.454348 | 0.199929 | 1 YTHDF3-AS1     | -      |
| ENSG00000138161 | -1.222941 | 0.581173 | 0.199929 | 1 CUZD1          | -      |
| ENSG00000179698 | -1.222941 | 0.581173 | 0.199929 | 1 KIAA1875       | -      |
| ENSG00000180089 | 1.129033  | 0.492852 | 0.199929 | 1 TMEM86B        | K18575 |
| ENSG00000236199 | 1.129033  | 0.492852 | 0.199929 | 1 RP11-264I13.2  | -      |
| ENSG00000173391 | -0.84568  | 7.785584 | 0.199974 | 1 OLR1           | K08763 |
| ENSG00000142102 | -0.862037 | 4.899941 | 0.200059 | 1 ATHL1          | K06566 |
| ENSG00000070759 | 0.913545  | 2.880214 | 0.200597 | 1 TESK2          | K08842 |
| ENSG00000188206 | 0.869247  | 4.3162   | 0.201287 | 1 HNRNPU-AS1     | -      |
| ENSG00000090238 | 0.877577  | 3.501256 | 0.201419 | 1 YPEL3          | -      |
| ENSG00000178700 | -0.945606 | 2.371371 | 0.201563 | 1 DHFRL1         | K00287 |
| ENSG00000156017 | -0.857628 | 4.837098 | 0.201945 | 1 C9orf41        | K19787 |
| ENSG00000260948 | 1.102794  | 0.955321 | 0.202302 | 1 RP11-552M11.8  | -      |
| ENSG00000140961 | 1.032978  | 0.981921 | 0.202302 | 1 OSGIN1         | -      |
| ENSG00000159184 | 1.032978  | 0.981921 | 0.202302 | 1 HOXB13         | -      |
| ENSG00000183128 | 1.032978  | 0.981921 | 0.202302 | 1 CALHM3         | K19740 |
| ENSG00000257122 | -1.037398 | 1.448868 | 0.202662 | 1 RRN3P3         | K15216 |
| ENSG00000072571 | -0.849745 | 5.569357 | 0.202717 | 1 HMMR           | K06267 |
| ENSG00000169071 | 0.847814  | 5.608293 | 0.202966 | 1 ROR2           | K05123 |
| ENSG00000164414 | -0.90862  | 2.989371 | 0.20302  | 1 SLC35A1        | K15272 |
| ENSG00000090674 | 0.855203  | 4.989022 | 0.203371 | 1 MCOLN1         | K04992 |
| ENSG00000165533 | -0.891344 | 3.419989 | 0.203604 | 1 TTC8           | K16781 |
| ENSG00000212907 | 0.837746  | 8.298457 | 0.203626 | 1 MT-ND4L        | K03882 |
| ENSG00000133641 | -0.849508 | 5.207241 | 0.203687 | 1 C12orf29       | K16533 |
| ENSG00000112972 | -0.838713 | 6.910369 | 0.204794 | 1 HMGCS1         | K01641 |
| ENSG00000161960 | -0.845801 | 5.446481 | 0.204841 | 1 EIF4A1         | K03257 |
| ENSG00000160172 | -1.013847 | 1.939489 | 0.204851 | 1 FAM86C2P       | K03842 |
| ENSG00000177822 | 0.999319  | 1.858034 | 0.204851 | 1 AC108142.1     | -      |
| ENSG00000049130 | -0.840699 | 6.440541 | 0.205014 | 1 KITLG          | K05461 |
| ENSG00000162511 | -1.379621 | 0.462847 | 0.205414 | 1 LAPTM5         | K12387 |
| ENSG00000238058 | -1.379621 | 0.462847 | 0.205414 | 1 RP11-432J22.2  | -      |
| ENSG00000256546 | -1.379621 | 0.462847 | 0.205414 | 1 AC156455.1     | -      |
| ENSG00000235109 | -1.001832 | 1.700777 | 0.205609 | 1 ZSCAN31        | K09230 |
| ENSG00000088367 | 0.844596  | 5.221509 | 0.20604  | 1 EPB41L1        | K06107 |
| ENSG00000135002 | -0.837816 | 6.275516 | 0.20635  | 1 RFK            | K00861 |
| ENSG00000188542 | -1.098849 | 1.38498  | 0.206388 | 1 DUSP28         | K14165 |
| ENSG00000125510 | 1.034106  | 1.275757 | 0.206388 | 1 OPRL1          | K04216 |
| ENSG00000236810 | -1.106123 | 1.015596 | 0.206864 | 1 RP5-886K2.3    | -      |
| ENSG00000257950 | -1.106123 | 1.015596 | 0.206864 | 1 P2RX5-TAX1BP3  | K05219 |
| ENSG00000165905 | 1.106052  | 0.887532 | 0.206864 | 1 GYLTL1B        | K09668 |
| ENSG00000115758 | -0.832449 | 7.118706 | 0.207815 | 1 ODC1           | K01581 |
| ENSG00000272870 | 0.989311  | 1.538405 | 0.208992 | 1 RP11-798M19.6  | -      |
| ENSG00000183963 | 0.834691  | 5.732701 | 0.209463 | 1 SMTN           | -      |
| ENSG00000082497 | -0.832482 | 6.091709 | 0.21003  | 1 SERTAD4        | -      |
| ENSG00000065534 | 0.957776  | 1.760896 | 0.210778 | 1 MYLK           | K00907 |
| ENSG00000237424 | 0.879763  | 3.176291 | 0.211063 | 1 FOXD2-AS1      | -      |

|                 |           |          |          |                 |        |
|-----------------|-----------|----------|----------|-----------------|--------|
| ENSG00000114019 | -0.825047 | 7.458848 | 0.211375 | 1 AMOTL2        | K16819 |
| ENSG00000174206 | -0.877669 | 3.286959 | 0.211481 | 1 C12orf66      | -      |
| ENSG00000167094 | 1.287655  | 0.14567  | 0.21179  | 1 TTC16         | -      |
| ENSG00000182253 | 1.287655  | 0.14567  | 0.21179  | 1 SYNM          | K10376 |
| ENSG00000198513 | 1.287655  | 0.14567  | 0.21179  | 1 ATL1          | K17339 |
| ENSG00000205583 | 1.287655  | 0.14567  | 0.21179  | 1 STAG3L1       | K13055 |
| ENSG00000224397 | 1.287655  | 0.14567  | 0.21179  | 1 RP11-290F20.3 | -      |
| ENSG00000249348 | 1.287655  | 0.14567  | 0.21179  | 1 UGDH-AS1      | -      |
| ENSG00000080947 | 1.152322  | 0.193847 | 0.21179  | 1 CROCCP3       | K16469 |
| ENSG00000100060 | 1.152322  | 0.193847 | 0.21179  | 1 MFNG          | K05948 |
| ENSG00000176222 | 1.152322  | 0.193847 | 0.21179  | 1 ZNF404        | K09228 |
| ENSG00000184551 | 1.152322  | 0.193847 | 0.21179  | 1 AC132872.1    | K08959 |
| ENSG00000257108 | 1.152322  | 0.193847 | 0.21179  | 1 NHLRC4        | K03860 |
| ENSG00000258620 | 1.152322  | 0.193847 | 0.21179  | 1 RP11-362L22.1 | -      |
| ENSG00000107443 | -1.162438 | 0.902753 | 0.21203  | 1 CCNJ          | -      |
| ENSG00000234840 | -1.162438 | 0.902753 | 0.21203  | 1 RP11-399D6.2  | -      |
| ENSG00000173894 | 0.934367  | 1.953858 | 0.212069 | 1 CBX2          | K11451 |
| ENSG00000182759 | 0.858842  | 3.700606 | 0.212593 | 1 MAFA          | K07595 |
| ENSG00000184574 | -1.056292 | 1.559671 | 0.212687 | 1 LPAR5         | K08390 |
| ENSG00000123838 | 0.987693  | 1.493116 | 0.212687 | 1 C4BPA         | K04002 |
| ENSG00000117395 | -0.8211   | 8.021554 | 0.21298  | 1 EBNA1BP2      | K14823 |
| ENSG00000146707 | -0.974206 | 2.171626 | 0.213042 | 1 POMZP3        | K14316 |
| ENSG00000128284 | -0.99948  | 1.78033  | 0.2141   | 1 APOL3         | K14480 |
| ENSG00000137440 | -0.871519 | 3.585673 | 0.21411  | 1 FGFBP1        | -      |
| ENSG00000033170 | -0.853585 | 3.892877 | 0.215161 | 1 FUT8          | K00717 |
| ENSG00000161091 | 0.815561  | 9.266771 | 0.215292 | 1 MFSD12        | -      |
| ENSG00000204291 | 0.84571   | 4.125425 | 0.215867 | 1 COL15A1       | K08135 |
| ENSG00000244486 | 0.896617  | 2.221735 | 0.216315 | 1 SCARF2        | -      |
| ENSG00000182578 | 0.909196  | 2.355335 | 0.216725 | 1 CSF1R         | K05090 |
| ENSG00000179240 | 0.984116  | 1.398162 | 0.216737 | 1 RP11-111M22.2 | -      |
| ENSG00000261373 | -0.853528 | 3.769976 | 0.21674  | 1 VPS9D1-AS1    | -      |
| ENSG00000188641 | -0.838511 | 4.3527   | 0.217017 | 1 DPYD          | K00207 |
| ENSG00000148180 | 0.815323  | 6.791141 | 0.217375 | 1 GSN           | K05768 |
| ENSG00000129474 | -0.818994 | 6.260253 | 0.217574 | 1 AJUBA         | K16682 |
| ENSG00000039139 | -1.231583 | 0.780296 | 0.21793  | 1 DNAH5         | K10408 |
| ENSG00000226688 | -1.231583 | 0.780296 | 0.21793  | 1 ENTPD1-AS1    | -      |
| ENSG00000080854 | 1.118181  | 0.663432 | 0.21793  | 1 IGSF9B        | -      |
| ENSG00000166736 | 1.118181  | 0.663432 | 0.21793  | 1 HTR3A         | K04819 |
| ENSG00000234028 | 1.118181  | 0.663432 | 0.21793  | 1 AC062029.1    | -      |
| ENSG00000261207 | 1.118181  | 0.663432 | 0.21793  | 1 LA16c-361A3.3 | -      |
| ENSG00000102934 | -0.829069 | 4.870262 | 0.218237 | 1 PLLP          | -      |
| ENSG00000140022 | 0.866448  | 3.297614 | 0.218356 | 1 STON2         | -      |
| ENSG00000153363 | -0.942068 | 2.089839 | 0.218709 | 1 LINC00467     | -      |
| ENSG00000107099 | -1.335731 | 0.163439 | 0.219277 | 1 DOCK8         | K13194 |
| ENSG00000196872 | -1.335731 | 0.163439 | 0.219277 | 1 KIAA1211L     | -      |
| ENSG00000224113 | -1.335731 | 0.163439 | 0.219277 | 1 RP5-837J1.2   | -      |
| ENSG00000253347 | 1.312367  | 0.026781 | 0.219277 | 1 CTD-2026D20.2 | -      |
| ENSG00000253846 | 1.312367  | 0.026781 | 0.219277 | 1 PCDHGA10      | K16495 |
| ENSG00000254530 | 1.312367  | 0.026781 | 0.219277 | 1 RP11-460B17.3 | -      |
| ENSG00000272822 | 1.312367  | 0.026781 | 0.219277 | 1 RP11-302B13.5 | K07938 |
| ENSG00000106692 | -0.831788 | 4.348368 | 0.219683 | 1 FKTN          | -      |
| ENSG00000154035 | 0.856439  | 3.215104 | 0.219685 | 1 C17orf103     | K06975 |
| ENSG00000106829 | -0.836365 | 4.170421 | 0.219698 | 1 TLE4          | -      |
| ENSG00000131981 | 0.808269  | 8.10257  | 0.219906 | 1 LGALS3        | K06831 |
| ENSG00000111731 | -0.822298 | 5.120666 | 0.220404 | 1 C2CD5         | -      |
| ENSG00000101811 | -0.82623  | 4.790369 | 0.220634 | 1 CSTF2         | K14407 |
| ENSG00000270696 | -0.840532 | 3.606952 | 0.220834 | 1 RP11-342K6.1  | -      |
| ENSG00000234665 | -1.011007 | 1.431151 | 0.221198 | 1 RP11-262H14.3 | -      |

|                 |           |          |          |                |        |
|-----------------|-----------|----------|----------|----------------|--------|
| ENSG00000139974 | -0.928421 | 2.199113 | 0.221818 | 1 SLC38A6      | K14993 |
| ENSG00000151413 | -0.854272 | 3.047723 | 0.222922 | 1 NUBPL        | K03593 |
| ENSG00000099194 | 0.801858  | 9.433463 | 0.222957 | 1 SCD          | K00507 |
| ENSG00000179094 | 0.814252  | 5.308517 | 0.223051 | 1 PER1         | K02633 |
| ENSG00000168259 | 0.821835  | 4.609303 | 0.223562 | 1 DNAJC7       | K09527 |
| ENSG00000162729 | 0.802545  | 7.529043 | 0.223624 | 1 IGSF8        | K06730 |
| ENSG00000169136 | -0.834932 | 3.776152 | 0.223716 | 1 ATF5         | K09044 |
| ENSG00000079805 | 0.801554  | 7.38453  | 0.224342 | 1 DNMT2        | K01528 |
| ENSG00000185864 | 1.123259  | 0.580574 | 0.224728 | 1 NPIP4        | K01896 |
| ENSG00000101236 | 0.808985  | 5.688982 | 0.224901 | 1 RNF24        | -      |
| ENSG00000054938 | 0.898815  | 1.932831 | 0.225187 | 1 CHRDL2       | K17280 |
| ENSG00000171471 | 0.898815  | 1.932831 | 0.225187 | 1 MAP1LC3B2    | K10435 |
| ENSG00000131094 | 0.817665  | 4.715297 | 0.225372 | 1 C1QL1        | -      |
| ENSG00000137767 | -0.806967 | 5.930592 | 0.225452 | 1 SQRDL        | K17218 |
| ENSG00000054392 | -0.883303 | 2.647238 | 0.225946 | 1 HHAT         | -      |
| ENSG00000132376 | 0.807447  | 5.0869   | 0.226481 | 1 INPP5K       | K01106 |
| ENSG00000161513 | -0.816783 | 4.477538 | 0.226494 | 1 FDXR         | K18914 |
| ENSG00000165996 | 0.843183  | 3.11254  | 0.227412 | 1 PTPLA        | K10703 |
| ENSG00000091622 | 0.802319  | 5.930376 | 0.227483 | 1 PITPNM3      | -      |
| ENSG00000154188 | -0.8222   | 4.28017  | 0.227513 | 1 ANGPT1       | K05465 |
| ENSG00000177138 | -1.520674 | -0.04925 | 0.228158 | 1 FAM9B        | K19528 |
| ENSG00000204011 | -1.520674 | -0.04925 | 0.228158 | 1 COL5A1-AS1   | -      |
| ENSG00000261270 | -1.520674 | -0.04925 | 0.228158 | 1 RP11-325K4.3 | -      |
| ENSG00000271303 | 0.862227  | 2.570918 | 0.228303 | 1 SRXN1        | K12260 |
| ENSG00000132603 | -0.804305 | 5.561063 | 0.228398 | 1 NIP7         | K07565 |
| ENSG00000143816 | 0.831777  | 3.783099 | 0.228586 | 1 WNT9A        | K01064 |
| ENSG00000163874 | 0.802329  | 5.677843 | 0.228753 | 1 ZC3H12A      | K18668 |
| ENSG00000168505 | -0.921817 | 1.947348 | 0.228785 | 1 GBX2         | K09321 |
| ENSG00000178685 | -0.957762 | 1.752474 | 0.229628 | 1 PARP10       | K15261 |
| ENSG00000105696 | 0.913809  | 1.697648 | 0.229628 | 1 TMEM59L      | -      |
| ENSG00000052344 | 0.847163  | 3.142587 | 0.23031  | 1 PRSS8        | K08664 |
| ENSG00000169604 | -0.790042 | 8.2054   | 0.230438 | 1 ANTXR1       | -      |
| ENSG00000175787 | 0.985965  | 1.446399 | 0.230584 | 1 ZNF169       | K09228 |
| ENSG00000068308 | 0.938918  | 1.464845 | 0.230584 | 1 OTUD5        | K12655 |
| ENSG00000123444 | 0.827652  | 3.754122 | 0.230794 | 1 KBTBD4       | K10472 |
| ENSG00000079215 | -0.793203 | 6.091789 | 0.231412 | 1 SLC1A3       | K05614 |
| ENSG00000158079 | -0.82754  | 3.941821 | 0.231434 | 1 PTPDC1       | K18078 |
| ENSG00000163491 | -0.925422 | 2.078806 | 0.23149  | 1 NEK10        | K08857 |
| ENSG00000131196 | 0.975219  | 1.187832 | 0.23162  | 1 NFATC1       | K04446 |
| ENSG00000003137 | -0.816145 | 4.350408 | 0.231947 | 1 CYP26B1      | K12664 |
| ENSG00000174606 | -0.812616 | 4.407131 | 0.232132 | 1 ANGEL2       | K18729 |
| ENSG00000005801 | -0.801679 | 5.100387 | 0.232207 | 1 ZNF195       | K09228 |
| ENSG00000260498 | 0.867426  | 2.614305 | 0.232421 | 1 RP4-536B24.4 | -      |
| ENSG00000244567 | -1.03244  | 0.966156 | 0.232558 | 1 AC096772.6   | -      |
| ENSG00000100647 | 0.821659  | 3.776827 | 0.232642 | 1 KIAA0247     | -      |
| ENSG00000201302 | -1.172612 | 0.547265 | 0.232646 | 1 SNORA65      | -      |
| ENSG00000143387 | 1.030056  | 0.439621 | 0.232646 | 1 CTSK         | K01371 |
| ENSG00000165269 | 1.030056  | 0.439621 | 0.232646 | 1 AQP7         | K08771 |
| ENSG00000100078 | -0.958115 | 1.902207 | 0.232659 | 1 PLA2G3       | K01047 |
| ENSG00000174628 | -0.958115 | 1.902207 | 0.232659 | 1 IQCK         | -      |
| ENSG00000136149 | 0.825291  | 3.368113 | 0.23281  | 1 RPL13AP25    | K02872 |
| ENSG00000102743 | -0.822119 | 3.838507 | 0.233317 | 1 SLC25A15     | K15101 |
| ENSG00000100445 | -0.866353 | 2.552517 | 0.233372 | 1 SDR39U1      | K07071 |
| ENSG00000259527 | 0.827078  | 3.102712 | 0.233806 | 1 LINC00052    | -      |
| ENSG00000233822 | 0.861236  | 2.374032 | 0.234472 | 1 HIST1H2BN    | K11252 |
| ENSG00000169519 | -0.796089 | 5.22598  | 0.234563 | 1 METTL15      | -      |
| ENSG00000205560 | -0.923706 | 2.0146   | 0.23517  | 1 CPT1B        | K19523 |
| ENSG00000213889 | -0.923706 | 2.0146   | 0.23517  | 1 PPM1N        | K04461 |

|                 |           |           |          |                  |        |
|-----------------|-----------|-----------|----------|------------------|--------|
| ENSG00000223784 | -0.923706 | 2.0146    | 0.23517  | 1 RP11-554I8.2   | -      |
| ENSG00000167103 | -0.830443 | 3.427167  | 0.235176 | 1 PIP5KL1        | K13712 |
| ENSG00000187049 | -0.816287 | 3.63155   | 0.235417 | 1 TMEM216        | K19385 |
| ENSG00000120162 | -0.796032 | 4.907051  | 0.235961 | 1 MOB3B          | K12581 |
| ENSG00000170145 | 0.786584  | 5.809216  | 0.236022 | 1 SIK2           | K16311 |
| ENSG00000073921 | 0.779981  | 8.376918  | 0.236112 | 1 PICALM         | -      |
| ENSG00000126368 | 0.815829  | 3.737895  | 0.236157 | 1 NR1D1          | K03728 |
| ENSG00000185585 | 0.793175  | 4.875354  | 0.236229 | 1 OLFML2A        | K12581 |
| ENSG00000171462 | 0.847331  | 2.90552   | 0.237566 | 1 DLK2           | -      |
| ENSG00000111700 | -1.019828 | 1.217755  | 0.237758 | 1 SLCO1B3        | K05043 |
| ENSG00000204685 | -1.019828 | 1.217755  | 0.237758 | 1 STARD7-AS1     | -      |
| ENSG00000137261 | 1.428717  | -0.399857 | 0.23879  | 1 KIAA0319       | -      |
| ENSG00000178773 | 1.428717  | -0.399857 | 0.23879  | 1 CPNE7          | -      |
| ENSG00000182851 | 1.428717  | -0.399857 | 0.23879  | 1 GPIHBP1        | -      |
| ENSG00000197701 | 1.428717  | -0.399857 | 0.23879  | 1 ZNF595         | K09228 |
| ENSG00000224805 | 1.428717  | -0.399857 | 0.23879  | 1 LINC00853      | -      |
| ENSG00000242396 | 1.428717  | -0.399857 | 0.23879  | 1 RP11-67L3.5    | -      |
| ENSG00000254064 | 1.428717  | -0.399857 | 0.23879  | 1 CTD-2530N21.4  | -      |
| ENSG00000257954 | 1.428717  | -0.399857 | 0.23879  | 1 RP11-161H23.10 | -      |
| ENSG00000264943 | 1.428717  | -0.399857 | 0.23879  | 1 SH3GL1P2       | K11247 |
| ENSG00000267348 | 1.428717  | -0.399857 | 0.23879  | 1 CTB-179K24.3   | -      |
| ENSG00000267546 | 1.428717  | -0.399857 | 0.23879  | 1 RP11-666A8.8   | -      |
| ENSG00000267940 | 1.428717  | -0.399857 | 0.23879  | 1 RP11-290F24.6  | -      |
| ENSG00000066583 | -0.793499 | 5.044516  | 0.238811 | 1 ISOC1          | -      |
| ENSG00000253930 | -0.911871 | 1.640967  | 0.238889 | 1 RP11-1149O23.2 | -      |
| ENSG00000136828 | 0.893802  | 2.193493  | 0.239089 | 1 RALGPS1        | -      |
| ENSG00000165983 | -0.800782 | 4.266443  | 0.239395 | 1 PTER           | K07048 |
| ENSG00000129354 | -0.789361 | 4.886487  | 0.239614 | 1 AP1M2          | K12393 |
| ENSG00000088035 | -0.793281 | 4.864159  | 0.239948 | 1 ALG6           | K03848 |
| ENSG00000232531 | 1.113679  | 0.741933  | 0.240055 | 1 AC027612.1     | K11428 |
| ENSG00000233230 | 1.113679  | 0.741933  | 0.240055 | 1 AC079807.2     | -      |
| ENSG00000065413 | 1.032002  | 0.773053  | 0.240055 | 1 ANKRD44        | K15503 |
| ENSG00000179583 | 1.032002  | 0.773053  | 0.240055 | 1 CIITA          | K08060 |
| ENSG00000184254 | -0.796787 | 4.453674  | 0.240228 | 1 ALDH1A3        | K00129 |
| ENSG00000198910 | 0.780186  | 5.545576  | 0.24034  | 1 LICAM          | K06550 |
| ENSG00000197746 | 0.771888  | 10.2595   | 0.240352 | 1 PSAP           | K12382 |
| ENSG00000136842 | 0.824843  | 3.087353  | 0.24038  | 1 TMOD1          | K10370 |
| ENSG00000181019 | -0.776159 | 6.79651   | 0.240415 | 1 NQO1           | K00355 |
| ENSG00000180066 | 0.851453  | 2.296451  | 0.240647 | 1 C10orf91       | -      |
| ENSG00000021645 | -0.917402 | 1.802436  | 0.241368 | 1 NRXN3          | K07377 |
| ENSG00000162078 | -0.917402 | 1.802436  | 0.241368 | 1 ZG16B          | -      |
| ENSG00000237310 | -0.956731 | 1.394972  | 0.241443 | 1 GS1-124K5.4    | -      |
| ENSG00000158457 | 0.927853  | 1.317319  | 0.241443 | 1 TSPAN33        | K17346 |
| ENSG00000246334 | 0.927853  | 1.317319  | 0.241443 | 1 PRR7-AS1       | -      |
| ENSG00000198435 | -0.787026 | 4.885002  | 0.241609 | 1 NRARP          | -      |
| ENSG00000189007 | -0.802241 | 3.941557  | 0.241667 | 1 ADAT2          | K15441 |
| ENSG00000267939 | -1.325516 | 0.425862  | 0.241983 | 1 CTD-2325M2.1   | -      |
| ENSG00000272054 | -1.325516 | 0.425862  | 0.241983 | 1 RP11-423P10.2  | -      |
| ENSG00000103723 | -1.269303 | 0.387787  | 0.241983 | 1 AP3B2          | K12397 |
| ENSG00000126246 | 1.143328  | 0.300286  | 0.241983 | 1 IGFLR1         | -      |
| ENSG00000254338 | 1.143328  | 0.300286  | 0.241983 | 1 RP11-909N17.3  | -      |
| ENSG00000257497 | 1.143328  | 0.300286  | 0.241983 | 1 RP11-585P4.5   | -      |
| ENSG00000158528 | -0.811684 | 3.686918  | 0.242563 | 1 PPP1R9A        | K17551 |
| ENSG00000174804 | -0.811684 | 3.686918  | 0.242563 | 1 FZD4           | K02354 |
| ENSG00000110042 | -0.786501 | 4.624651  | 0.242574 | 1 DTX4           | K06058 |
| ENSG00000207652 | -0.862485 | 2.316608  | 0.244008 | 1 MIR621         | -      |
| ENSG00000231721 | 0.847948  | 2.269654  | 0.244008 | 1 LINC-PINT      | -      |
| ENSG00000234978 | -0.957315 | 1.585004  | 0.244179 | 1 RP11-423O2.5   | -      |

|                 |           |           |          |                   |        |
|-----------------|-----------|-----------|----------|-------------------|--------|
| ENSG00000187607 | -0.83792  | 2.617622  | 0.24426  | 1 ZNF286A         | K09228 |
| ENSG00000163898 | -0.831134 | 2.872559  | 0.244366 | 1 LIPH            | K19404 |
| ENSG00000126778 | -0.818044 | 3.083613  | 0.244408 | 1 SIX1            | K15614 |
| ENSG00000106733 | -0.806067 | 3.58474   | 0.244409 | 1 NMRK1           | K10524 |
| ENSG00000141564 | 0.770668  | 6.21317   | 0.244571 | 1 RPTOR           | K07204 |
| ENSG00000152582 | -1.025522 | 1.097572  | 0.244669 | 1 SPEF2           | -      |
| ENSG00000171428 | -1.025522 | 1.097572  | 0.244669 | 1 NAT1            | K00622 |
| ENSG00000198754 | 0.966385  | 1.007955  | 0.244669 | 1 OXCT2           | K01027 |
| ENSG00000207425 | 0.966385  | 1.007955  | 0.244669 | 1 Y_RNA           | -      |
| ENSG00000256018 | 0.966385  | 1.007955  | 0.244669 | 1 HIST1H3G        | K11253 |
| ENSG00000272767 | 0.966385  | 1.007955  | 0.244669 | 1 JMJD1C-AS1      | -      |
| ENSG00000117174 | -0.769854 | 6.11913   | 0.245131 | 1 ZNHIT6          | -      |
| ENSG00000133328 | -0.869489 | 2.419164  | 0.245203 | 1 HRASLS2         | K16817 |
| ENSG00000169908 | 0.763073  | 10.44003  | 0.245677 | 1 TM4SF1          | -      |
| ENSG00000132541 | -0.778134 | 5.271935  | 0.245729 | 1 HRSP12          | -      |
| ENSG00000083454 | -0.803661 | 3.562644  | 0.245917 | 1 P2RX5           | K05219 |
| ENSG00000132906 | 0.772199  | 5.355524  | 0.246206 | 1 CASP9           | K04399 |
| ENSG00000178695 | -0.785132 | 4.737114  | 0.246268 | 1 KCTD12          | -      |
| ENSG00000185842 | -0.936441 | 1.738318  | 0.246285 | 1 DNAH14          | K10408 |
| ENSG00000074590 | -0.792307 | 4.33516   | 0.246382 | 1 NUAK1           | K08800 |
| ENSG00000258498 | -0.881712 | 2.168325  | 0.2464   | 1 DIO3OS          | -      |
| ENSG00000249306 | 0.856173  | 2.116649  | 0.2464   | 1 RP11-267A15.1   | -      |
| ENSG00000116791 | -0.770635 | 5.915522  | 0.246699 | 1 CRYZ            | K00344 |
| ENSG00000088808 | 0.815234  | 2.803328  | 0.246822 | 1 PPP1R13B        | K17554 |
| ENSG00000198168 | -0.808346 | 3.502174  | 0.247032 | 1 SVIP            | K14014 |
| ENSG00000115875 | -0.76279  | 7.691686  | 0.247196 | 1 SRSF7           | K12896 |
| ENSG00000119950 | 0.764942  | 6.475483  | 0.247376 | 1 MXI1            | K09114 |
| ENSG00000138771 | -0.774502 | 5.282078  | 0.247416 | 1 SHROOM3         | -      |
| ENSG00000174705 | 0.765947  | 6.120688  | 0.24754  | 1 SH3PXD2B        | -      |
| ENSG00000162757 | -0.873337 | 2.272075  | 0.247574 | 1 C1orf74         | -      |
| ENSG00000184441 | 0.923599  | 1.264704  | 0.247778 | 1 AP001062.7      | -      |
| ENSG00000196391 | -0.919727 | 1.876745  | 0.247954 | 1 ZNF774          | -      |
| ENSG00000173548 | 0.76902   | 5.722676  | 0.2481   | 1 SNX33           | K17923 |
| ENSG00000102897 | -0.786597 | 4.082351  | 0.248239 | 1 LYRM1           | -      |
| ENSG00000135069 | -0.760227 | 7.921062  | 0.248544 | 1 PSAT1           | K00831 |
| ENSG00000120913 | 0.767856  | 5.397889  | 0.248564 | 1 PDLIM2          | -      |
| ENSG00000158483 | -0.866116 | 2.368811  | 0.248583 | 1 FAM86C1         | -      |
| ENSG00000158246 | 0.77976   | 4.449598  | 0.248628 | 1 FAM46B          | -      |
| ENSG00000183401 | -1.144564 | 0.721298  | 0.248713 | 1 CCDC159         | -      |
| ENSG00000221500 | -1.144564 | 0.721298  | 0.248713 | 1 SNORD100        | -      |
| ENSG00000250303 | -1.144564 | 0.721298  | 0.248713 | 1 RP11-356J5.12   | -      |
| ENSG00000196405 | 0.762641  | 6.233178  | 0.249122 | 1 EVL             | -      |
| ENSG00000155008 | -0.872631 | 2.467796  | 0.249459 | 1 APOOL           | -      |
| ENSG00000112096 | 0.75756   | 8.515058  | 0.249627 | 1 SOD2            | K04564 |
| ENSG00000229419 | 0.935483  | 1.417278  | 0.249994 | 1 RALGAPA1P       | -      |
| ENSG00000221867 | 0.790176  | 3.447361  | 0.250333 | 1 MAGEA3          | -      |
| ENSG00000139324 | -0.770211 | 5.143018  | 0.251188 | 1 TMTC3           | -      |
| ENSG00000132000 | -1.622248 | -0.434073 | 0.251568 | 1 PODNL1          | -      |
| ENSG00000151623 | -1.622248 | -0.434073 | 0.251568 | 1 NR3C2           | K08555 |
| ENSG00000214198 | -1.622248 | -0.434073 | 0.251568 | 1 RP11-642P15.1   | -      |
| ENSG00000230042 | -1.622248 | -0.434073 | 0.251568 | 1 AK3P3           | K00944 |
| ENSG00000237651 | -1.622248 | -0.434073 | 0.251568 | 1 C2orf74         | -      |
| ENSG00000248698 | -1.622248 | -0.434073 | 0.251568 | 1 LINC01085       | -      |
| ENSG00000257433 | -1.622248 | -0.434073 | 0.251568 | 1 RP1-197B17.3    | -      |
| ENSG00000272825 | -1.622248 | -0.434073 | 0.251568 | 1 LL21NC02-1C16.2 | -      |
| ENSG00000108602 | -1.508305 | -0.507097 | 0.251568 | 1 ALDH3A1         | K00129 |
| ENSG00000153902 | -1.508305 | -0.507097 | 0.251568 | 1 LGI4            | -      |
| ENSG00000196427 | -1.508305 | -0.507097 | 0.251568 | 1 NBPF4           | -      |



|                 |           |           |          |                 |        |
|-----------------|-----------|-----------|----------|-----------------|--------|
| ENSG00000197061 | -1.508305 | -0.507097 | 0.251568 | 1 HIST1H4C      | K11253 |
| ENSG00000214184 | -1.508305 | -0.507097 | 0.251568 | 1 AC012487.2    | -      |
| ENSG00000235475 | -1.508305 | -0.507097 | 0.251568 | 1 RP11-166O4.5  | -      |
| ENSG00000238363 | -1.508305 | -0.507097 | 0.251568 | 1 SNORA13       | -      |
| ENSG00000250731 | -1.508305 | -0.507097 | 0.251568 | 1 TPM3P6        | K09290 |
| ENSG00000259343 | -1.508305 | -0.507097 | 0.251568 | 1 RP11-761I4.3  | -      |
| ENSG00000270019 | -1.508305 | -0.507097 | 0.251568 | 1 RP11-141B14.1 | -      |
| ENSG00000270587 | -1.508305 | -0.507097 | 0.251568 | 1 RP11-51F16.9  | -      |
| ENSG00000179364 | 0.90636   | 1.615483  | 0.251644 | 1 PACS2         | -      |
| ENSG00000143498 | -0.803227 | 3.454955  | 0.252051 | 1 TAF1A         | K15212 |
| ENSG00000063169 | 0.775418  | 4.287905  | 0.252224 | 1 GLTSCR1       | K12581 |
| ENSG00000186994 | 1.032685  | 0.915494  | 0.252505 | 1 KANK3         | K09654 |
| ENSG00000232833 | 1.032685  | 0.915494  | 0.252505 | 1 FAM27E3       | -      |
| ENSG00000156804 | 0.800451  | 3.206764  | 0.252625 | 1 FBXO32        | K10305 |
| ENSG00000167074 | 0.800451  | 3.206764  | 0.252625 | 1 TEF           | K09058 |
| ENSG00000100319 | 0.77392   | 4.045813  | 0.252979 | 1 ZMAT5         | K13152 |
| ENSG00000181894 | 0.820511  | 2.952266  | 0.253383 | 1 ZNF329        | -      |
| ENSG00000264112 | -0.784011 | 3.706807  | 0.253613 | 1 RP11-159D12.2 | -      |
| ENSG00000151208 | 0.762983  | 4.983701  | 0.253907 | 1 DLG5          | -      |
| ENSG00000203705 | -0.774621 | 4.417161  | 0.253915 | 1 TATDN3        | K03424 |
| ENSG00000148842 | 0.76316   | 4.625722  | 0.254213 | 1 CNNM2         | K16302 |
| ENSG00000170522 | -0.774256 | 4.504518  | 0.254392 | 1 ELOVL6        | K10203 |
| ENSG00000198130 | -0.774256 | 4.504518  | 0.254392 | 1 HIBCH         | K05605 |
| ENSG00000198830 | -0.75347  | 6.726919  | 0.254439 | 1 HMGN2         | K11300 |
| ENSG00000103381 | -0.782624 | 3.569729  | 0.254528 | 1 CPPED1        | -      |
| ENSG00000121671 | 0.767394  | 4.535635  | 0.25461  | 1 CRY2          | K02295 |
| ENSG00000245958 | -0.817832 | 2.829657  | 0.25521  | 1 RP11-33B1.1   | -      |
| ENSG00000168118 | 0.770514  | 4.260669  | 0.255242 | 1 RAB4A         | K07879 |
| ENSG00000130270 | 0.775344  | 4.053764  | 0.255474 | 1 ATP8B3        | K01530 |
| ENSG00000138459 | -0.768134 | 4.563002  | 0.255552 | 1 SLC35A5       | K15274 |
| ENSG00000146072 | -0.761331 | 5.130578  | 0.255806 | 1 TNFRSF21      | K05157 |
| ENSG00000244627 | 0.81885   | 2.252547  | 0.255952 | 1 RP3-449O17.1  | K18079 |
| ENSG00000132109 | -0.777455 | 4.213022  | 0.256067 | 1 TRIM21        | K10651 |
| ENSG00000119986 | 0.746688  | 7.746257  | 0.256954 | 1 AVPI1         | -      |
| ENSG00000185100 | 0.773506  | 3.764564  | 0.257066 | 1 ADSSL1        | K01939 |
| ENSG00000175279 | -0.834027 | 2.573888  | 0.25718  | 1 APITD1        | K11511 |
| ENSG00000126838 | 0.761176  | 4.79375   | 0.257269 | 1 PZP           | K03910 |
| ENSG00000142188 | 0.855113  | 1.545813  | 0.257504 | 1 TMEM50B       | -      |
| ENSG00000171282 | 0.855113  | 1.545813  | 0.257504 | 1 RP11-1055B8.7 | -      |
| ENSG00000186847 | 0.855113  | 1.545813  | 0.257504 | 1 KRT14         | K07604 |
| ENSG00000239779 | -0.827098 | 2.727544  | 0.257756 | 1 WBP1          | -      |
| ENSG00000183722 | -0.875684 | 1.774987  | 0.258293 | 1 LHFP          | -      |
| ENSG00000167615 | 0.875506  | 1.712928  | 0.258293 | 1 LENG8         | -      |
| ENSG00000196177 | -0.777678 | 3.844102  | 0.258701 | 1 ACADSB        | K09478 |
| ENSG00000232336 | -1.051957 | 0.659466  | 0.25882  | 1 RP11-782C8.3  | -      |
| ENSG00000258325 | -1.051957 | 0.659466  | 0.25882  | 1 RP4-816N1.6   | -      |
| ENSG00000169282 | 1.030639  | 0.53019   | 0.25882  | 1 KCNAB1        | K04882 |
| ENSG00000255320 | 1.030639  | 0.53019   | 0.25882  | 1 RP11-755F10.1 | -      |
| ENSG00000272356 | 1.030639  | 0.53019   | 0.25882  | 1 RP5-1112D6.8  | -      |
| ENSG00000136371 | -0.792008 | 3.12387   | 0.258872 | 1 MTHFS         | K01934 |
| ENSG00000006638 | 0.767567  | 3.923722  | 0.258921 | 1 TBXA2R        | K04264 |
| ENSG00000165072 | 0.773799  | 3.958006  | 0.258988 | 1 MAMDC2        | -      |
| ENSG00000155893 | -0.796734 | 3.285498  | 0.259232 | 1 ACPL2         | -      |
| ENSG00000169155 | 0.753585  | 4.679973  | 0.25932  | 1 ZBTB43        | K10514 |
| ENSG00000106991 | 0.83956   | 1.991401  | 0.259338 | 1 ENG           | K06526 |
| ENSG00000185112 | -0.776048 | 3.683043  | 0.259931 | 1 FAM43A        | -      |
| ENSG00000151025 | -0.852332 | 2.35981   | 0.26021  | 1 GPR158        | K08469 |
| ENSG00000165475 | -0.846906 | 2.451001  | 0.2604   | 1 CRYL1         | K13247 |

|                 |           |           |          |                 |        |
|-----------------|-----------|-----------|----------|-----------------|--------|
| ENSG00000116701 | -0.76287  | 4.32844   | 0.260667 | 1 NCF2          | K08010 |
| ENSG00000120708 | 0.739994  | 8.170395  | 0.260867 | 1 TGFBI         | K19519 |
| ENSG00000205885 | 0.793807  | 2.889238  | 0.261059 | 1 C1RL-AS1      | -      |
| ENSG00000137460 | -0.799076 | 2.981391  | 0.261123 | 1 FHDC1         | K10408 |
| ENSG00000185261 | -0.994138 | 0.940705  | 0.261464 | 1 KIAA0825      | -      |
| ENSG00000105793 | -0.758099 | 4.782199  | 0.261764 | 1 GTPBP10       | -      |
| ENSG00000238266 | -0.749022 | 5.48406   | 0.261801 | 1 LINC00707     | -      |
| ENSG00000106443 | -0.750983 | 5.171166  | 0.262375 | 1 PHF14         | -      |
| ENSG00000197555 | 0.757783  | 4.65048   | 0.262585 | 1 SIPA1L1       | K17701 |
| ENSG00000242687 | 0.908626  | 1.094705  | 0.262816 | 1 AC004893.11   | -      |
| ENSG00000180592 | 0.766856  | 3.50692   | 0.263301 | 1 SKIDA1        | -      |
| ENSG00000139915 | -0.928808 | 1.376495  | 0.263542 | 1 MDGA2         | -      |
| ENSG00000106868 | -0.908544 | 1.552735  | 0.263939 | 1 SUSD1         | -      |
| ENSG00000139187 | -0.908544 | 1.552735  | 0.263939 | 1 KLRG1         | K10076 |
| ENSG00000093217 | 0.893358  | 1.483016  | 0.263939 | 1 XYL B         | K00854 |
| ENSG00000226396 | 0.893358  | 1.483016  | 0.263939 | 1 RPS14P3       | K02955 |
| ENSG00000149474 | -0.809898 | 2.753374  | 0.26394  | 1 CSRP2BP       | K18188 |
| ENSG00000240356 | -0.817513 | 2.520755  | 0.264114 | 1 RPL23AP7      | K02893 |
| ENSG00000166801 | -0.900143 | 1.863826  | 0.264252 | 1 FAM111A       | -      |
| ENSG00000078098 | -0.880289 | 1.850776  | 0.264252 | 1 FAP           | K08674 |
| ENSG00000103226 | 0.848228  | 2.055353  | 0.264288 | 1 NOMO3         | -      |
| ENSG00000248367 | 0.848228  | 2.055353  | 0.264288 | 1 CTB-129O4.1   | -      |
| ENSG00000106078 | 0.738285  | 6.08995   | 0.264608 | 1 COBL          | K18623 |
| ENSG00000168610 | 0.734721  | 7.650889  | 0.264672 | 1 STAT3         | K04692 |
| ENSG00000139428 | -0.745893 | 4.954213  | 0.26519  | 1 MMAB          | K00798 |
| ENSG00000100226 | 0.738578  | 6.153144  | 0.265384 | 1 GTPBP1        | -      |
| ENSG00000163995 | 0.763096  | 3.758218  | 0.266189 | 1 ABLIM2        | K07520 |
| ENSG00000170955 | -0.74293  | 4.975207  | 0.266499 | 1 PRKCDBP       | -      |
| ENSG00000183615 | 0.760126  | 3.639854  | 0.266521 | 1 FAM167B       | -      |
| ENSG00000147166 | -2.193622 | -0.77266  | 0.266667 | 1 ITGB1BP2      | K16735 |
| ENSG00000148346 | -2.193622 | -0.77266  | 0.266667 | 1 LCN2          | -      |
| ENSG00000169429 | -2.193622 | -0.77266  | 0.266667 | 1 IL8           | K10030 |
| ENSG00000183826 | -2.193622 | -0.77266  | 0.266667 | 1 BTBD9         | K10481 |
| ENSG00000196684 | -2.193622 | -0.77266  | 0.266667 | 1 HSH2D         | -      |
| ENSG00000204778 | -2.193622 | -0.77266  | 0.266667 | 1 RP11-15J10.1  | -      |
| ENSG00000225721 | -2.193622 | -0.77266  | 0.266667 | 1 RP11-269F19.2 | -      |
| ENSG00000234779 | -2.193622 | -0.77266  | 0.266667 | 1 RP11-62F24.2  | -      |
| ENSG00000240288 | -2.193622 | -0.77266  | 0.266667 | 1 GHRLOS        | -      |
| ENSG00000248783 | -2.193622 | -0.77266  | 0.266667 | 1 RP11-308B16.2 | -      |
| ENSG00000253893 | -2.193622 | -0.77266  | 0.266667 | 1 FAM85B        | -      |
| ENSG00000266777 | -2.193622 | -0.77266  | 0.266667 | 1 SH3GL1P1      | K11247 |
| ENSG00000271933 | -2.193622 | -0.77266  | 0.266667 | 1 RP11-338I21.1 | -      |
| ENSG00000102195 | 1.720581  | -0.998959 | 0.266667 | 1 GPR50         | K04287 |
| ENSG00000120156 | 1.720581  | -0.998959 | 0.266667 | 1 TEK           | K05121 |
| ENSG00000131730 | 1.720581  | -0.998959 | 0.266667 | 1 CKMT2         | K00933 |
| ENSG00000132837 | 1.720581  | -0.998959 | 0.266667 | 1 DMGDH         | K00315 |
| ENSG00000157703 | 1.720581  | -0.998959 | 0.266667 | 1 SVOPL         | -      |
| ENSG00000160282 | 1.720581  | -0.998959 | 0.266667 | 1 FTCD          | K13990 |
| ENSG00000173175 | 1.720581  | -0.998959 | 0.266667 | 1 ADCY5         | K08045 |
| ENSG00000173868 | 1.720581  | -0.998959 | 0.266667 | 1 PHOSPHO1      | K06124 |
| ENSG00000179774 | 1.720581  | -0.998959 | 0.266667 | 1 ATOH7         | K09083 |
| ENSG00000188886 | 1.720581  | -0.998959 | 0.266667 | 1 ASTL          | K08778 |
| ENSG00000206561 | 1.720581  | -0.998959 | 0.266667 | 1 COLQ          | -      |
| ENSG00000213413 | 1.720581  | -0.998959 | 0.266667 | 1 PVRIG         | -      |
| ENSG00000226413 | 1.720581  | -0.998959 | 0.266667 | 1 OR8T1P        | K04257 |
| ENSG00000226864 | 1.720581  | -0.998959 | 0.266667 | 1 ATE1-AS1      | -      |
| ENSG00000228288 | 1.720581  | -0.998959 | 0.266667 | 1 PCAT6         | -      |
| ENSG00000230424 | 1.720581  | -0.998959 | 0.266667 | 1 RP1-43E13.2   | -      |

|                 |           |           |          |                 |        |
|-----------------|-----------|-----------|----------|-----------------|--------|
| ENSG00000233903 | 1.720581  | -0.998959 | 0.266667 | 1 Z83851.4      | -      |
| ENSG00000235036 | 1.720581  | -0.998959 | 0.266667 | 1 RP5-1099D15.1 | K09529 |
| ENSG00000236739 | 1.720581  | -0.998959 | 0.266667 | 1 RP11-370B11.1 | K05024 |
| ENSG00000236986 | 1.720581  | -0.998959 | 0.266667 | 1 RP11-544A12.4 | -      |
| ENSG00000237984 | 1.720581  | -0.998959 | 0.266667 | 1 PTENP1        | K01110 |
| ENSG00000243176 | 1.720581  | -0.998959 | 0.266667 | 1 RP11-550I24.2 | -      |
| ENSG00000251070 | 1.720581  | -0.998959 | 0.266667 | 1 BMS1P6        | K14569 |
| ENSG00000256655 | 1.720581  | -0.998959 | 0.266667 | 1 TMEM75        | -      |
| ENSG00000257573 | 1.720581  | -0.998959 | 0.266667 | 1 RP11-496I2.5  | K11518 |
| ENSG00000260646 | 1.720581  | -0.998959 | 0.266667 | 1 LA16c-385E7.1 | -      |
| ENSG00000261098 | 1.720581  | -0.998959 | 0.266667 | 1 RP11-819C21.1 | -      |
| ENSG00000263884 | 1.720581  | -0.998959 | 0.266667 | 1 RP11-705O1.8  | -      |
| ENSG00000264769 | 1.720581  | -0.998959 | 0.266667 | 1 RP11-498C9.12 | -      |
| ENSG00000267264 | 1.720581  | -0.998959 | 0.266667 | 1 CTC-459F4.6   | K04614 |
| ENSG00000267355 | 1.720581  | -0.998959 | 0.266667 | 1 RPL9P29       | K02940 |
| ENSG00000160584 | 0.747032  | 4.671397  | 0.266697 | 1 SIK3          | K19009 |
| ENSG00000167535 | 0.747032  | 4.671397  | 0.266697 | 1 CACNB3        | K04864 |
| ENSG00000163637 | -1.265914 | 0.116968  | 0.266675 | 1 PRICKLE2      | K04511 |
| ENSG00000186056 | -1.265914 | 0.116968  | 0.266675 | 1 MATN1-AS1     | -      |
| ENSG00000218358 | -1.265914 | 0.116968  | 0.266675 | 1 RAET1K        | K07986 |
| ENSG00000260023 | -1.265914 | 0.116968  | 0.266675 | 1 RP11-49C24.1  | -      |
| ENSG00000101605 | 1.175928  | -0.044789 | 0.266675 | 1 MYOM1         | -      |
| ENSG00000116983 | 1.175928  | -0.044789 | 0.266675 | 1 HPCAL4        | -      |
| ENSG00000175946 | 1.175928  | -0.044789 | 0.266675 | 1 KLHL38        | K13959 |
| ENSG00000227827 | 1.175928  | -0.044789 | 0.266675 | 1 RP11-958N24.2 | K04985 |
| ENSG00000246451 | 1.175928  | -0.044789 | 0.266675 | 1 RP11-894P9.1  | -      |
| ENSG00000254682 | 1.175928  | -0.044789 | 0.266675 | 1 RP11-660L16.2 | -      |
| ENSG00000172081 | 0.750623  | 4.613257  | 0.266898 | 1 MOB3A         | K17985 |
| ENSG00000110080 | 0.733292  | 6.415819  | 0.267291 | 1 ST3GAL4       | K03494 |
| ENSG00000103534 | 0.738615  | 5.196667  | 0.267548 | 1 TMC5          | K12581 |
| ENSG00000248098 | 0.777466  | 3.230811  | 0.267908 | 1 BCKDHA        | K00166 |
| ENSG00000169019 | -0.757739 | 4.337086  | 0.268    | 1 COMMD8        | -      |
| ENSG00000152484 | 0.730921  | 6.382973  | 0.268441 | 1 USP12         | K11842 |
| ENSG00000065833 | -0.742002 | 5.097726  | 0.269244 | 1 ME1           | K00029 |
| ENSG00000080845 | 0.73499   | 5.35232   | 0.269578 | 1 DLGAP4        | -      |
| ENSG00000104320 | -0.731084 | 6.435315  | 0.26996  | 1 NBN           | K10867 |
| ENSG00000072682 | 0.728016  | 6.569642  | 0.270349 | 1 P4HA2         | K00472 |
| ENSG00000203883 | 0.744188  | 4.580572  | 0.270546 | 1 SOX18         | K09270 |
| ENSG00000102362 | -1.120464 | 0.51244   | 0.270771 | 1 SYTL4         | K17598 |
| ENSG00000186710 | -1.120464 | 0.51244   | 0.270771 | 1 CCDC42B       | K14808 |
| ENSG00000222365 | -1.120464 | 0.51244   | 0.270771 | 1 SNORD12B      | -      |
| ENSG00000228265 | -1.120464 | 0.51244   | 0.270771 | 1 RP5-1125A11.1 | -      |
| ENSG00000249572 | -1.120464 | 0.51244   | 0.270771 | 1 CTD-2203K17.1 | -      |
| ENSG00000259456 | -1.120464 | 0.51244   | 0.270771 | 1 RP5-914P20.5  | -      |
| ENSG00000261556 | -0.931127 | 1.476015  | 0.271034 | 1 RP11-296I10.6 | K08873 |
| ENSG00000170776 | 0.728725  | 6.313853  | 0.271201 | 1 AKAP13        | K16529 |
| ENSG00000119514 | 0.919006  | 1.210162  | 0.271493 | 1 GALNT12       | K00710 |
| ENSG00000121895 | -0.758535 | 3.89772   | 0.271569 | 1 TMEM156       | K09228 |
| ENSG00000205084 | -0.781335 | 3.372405  | 0.271592 | 1 TMEM231       | K19362 |
| ENSG00000165390 | -1.041024 | 0.821171  | 0.2718   | 1 ANXA8         | K17096 |
| ENSG00000209482 | -1.041024 | 0.821171  | 0.2718   | 1 SNORD83A      | -      |
| ENSG00000222009 | -1.041024 | 0.821171  | 0.2718   | 1 BTBD19        | K17985 |
| ENSG00000260196 | -1.041024 | 0.821171  | 0.2718   | 1 RP1-239B22.5  | -      |
| ENSG00000231890 | 1.031601  | 0.696395  | 0.2718   | 1 AC093391.2    | -      |
| ENSG00000166793 | 0.949924  | 0.728498  | 0.2718   | 1 YPEL4         | -      |
| ENSG00000260774 | 0.949924  | 0.728498  | 0.2718   | 1 CTD-2083E4.4  | -      |
| ENSG00000135596 | -0.990897 | 1.074514  | 0.271828 | 1 MICAL1        | -      |
| ENSG00000260177 | 0.780995  | 2.913049  | 0.271945 | 1 RP4-536B24.3  | -      |

|                 |           |           |          |                 |        |
|-----------------|-----------|-----------|----------|-----------------|--------|
| ENSG00000133313 | -0.731905 | 5.620047  | 0.272238 | 1 CNDP2         | K08660 |
| ENSG00000047346 | 0.737512  | 4.258633  | 0.272703 | 1 FAM214A       | -      |
| ENSG00000260260 | 0.754884  | 3.900504  | 0.272853 | 1 RP11-304L19.5 | -      |
| ENSG00000257704 | 0.751034  | 3.423677  | 0.273073 | 1 PRR24         | -      |
| ENSG00000117472 | 0.756303  | 3.326232  | 0.273801 | 1 TSPAN1        | K17348 |
| ENSG00000264281 | 0.785976  | 2.623951  | 0.273923 | 1 CTD-2031P19.4 | K02928 |
| ENSG00000067992 | 0.77174   | 2.953475  | 0.274374 | 1 PDK3          | K00898 |
| ENSG00000173166 | 0.834923  | 1.958357  | 0.274487 | 1 RAPH1         | -      |
| ENSG00000166822 | -0.754413 | 3.70642   | 0.274563 | 1 TMEM170A      | K04613 |
| ENSG00000178202 | -0.737388 | 4.812005  | 0.274717 | 1 KDEL2         | K12581 |
| ENSG00000196937 | -0.728142 | 5.394398  | 0.275054 | 1 FAM3C         | -      |
| ENSG00000173588 | -0.748069 | 4.127762  | 0.275079 | 1 CCDC41        | K16754 |
| ENSG00000145287 | -0.72027  | 6.99342   | 0.275248 | 1 PLAC8         | -      |
| ENSG00000117394 | 0.720797  | 6.445368  | 0.275597 | 1 SLC2A1        | K07299 |
| ENSG00000120616 | -0.740254 | 4.406671  | 0.275813 | 1 EPC1          | K11322 |
| ENSG00000242265 | -0.723554 | 6.124251  | 0.275994 | 1 PEG10         | -      |
| ENSG00000256667 | -0.854363 | 1.761041  | 0.276398 | 1 KLRAP1        | -      |
| ENSG00000137628 | -0.72054  | 6.596252  | 0.276504 | 1 DDX60         | -      |
| ENSG00000149243 | -0.780529 | 3.030118  | 0.27669  | 1 KLHL35        | K10461 |
| ENSG00000197119 | 0.717864  | 6.411645  | 0.277211 | 1 SLC25A29      | K15109 |
| ENSG00000178904 | -0.736555 | 4.459289  | 0.277297 | 1 DPY19L3       | K12581 |
| ENSG00000205220 | -0.755861 | 3.182268  | 0.277647 | 1 PSMB10        | K02733 |
| ENSG00000196914 | 0.716599  | 6.708605  | 0.277839 | 1 ARHGEF12      | K07532 |
| ENSG00000067082 | -0.717878 | 6.560119  | 0.27804  | 1 KLF6          | K09207 |
| ENSG00000132570 | -0.810015 | 2.558338  | 0.278422 | 1 PCBD2         | K01724 |
| ENSG00000130382 | 0.719513  | 5.379004  | 0.278782 | 1 MLLT1         | K15187 |
| ENSG00000102738 | -0.728403 | 4.797894  | 0.278785 | 1 MRPS31        | K17410 |
| ENSG00000196668 | 0.877524  | 1.337583  | 0.278896 | 1 LINC00173     | -      |
| ENSG00000111145 | -0.728707 | 4.568337  | 0.278962 | 1 ELK3          | K09430 |
| ENSG00000255112 | 0.714705  | 6.721581  | 0.279076 | 1 CHMP1B        | K08834 |
| ENSG00000144749 | -0.812647 | 2.473877  | 0.279364 | 1 LRIG1         | -      |
| ENSG00000169193 | -0.799727 | 2.465534  | 0.279364 | 1 CCDC126       | -      |
| ENSG00000145348 | -0.772503 | 2.765361  | 0.279536 | 1 TBCK          | K17544 |
| ENSG00000186687 | -0.727615 | 4.420954  | 0.279778 | 1 LYRM7         | K18170 |
| ENSG00000146263 | -0.731251 | 4.308486  | 0.280123 | 1 MMS22L        | -      |
| ENSG00000164695 | -0.729095 | 4.683435  | 0.280162 | 1 CHMP4C        | K12194 |
| ENSG00000185186 | 0.830065  | 1.924558  | 0.280167 | 1 LINC00313     | -      |
| ENSG00000139438 | 0.914031  | 1.153549  | 0.280417 | 1 FAM222A       | -      |
| ENSG00000104549 | -0.715202 | 6.400598  | 0.280496 | 1 SQLE          | K00511 |
| ENSG00000152137 | 0.733082  | 3.955617  | 0.280714 | 1 HSPB8         | K08879 |
| ENSG00000164463 | 0.745876  | 3.272922  | 0.280845 | 1 CREBRF        | -      |
| ENSG00000151012 | -0.728946 | 4.410717  | 0.280919 | 1 SLC7A11       | K13869 |
| ENSG00000035681 | -0.720597 | 5.338224  | 0.281021 | 1 NSMAF         | K18953 |
| ENSG00000077044 | 0.710173  | 7.372743  | 0.281122 | 1 DGKD          | K00901 |
| ENSG00000107957 | 0.709809  | 7.533837  | 0.281184 | 1 SH3PXD2A      | -      |
| ENSG00000242221 | 0.746169  | 3.398993  | 0.281301 | 1 PSG2          | K06500 |
| ENSG00000127081 | 0.814612  | 2.224949  | 0.281607 | 1 ZNF484        | K09228 |
| ENSG00000105663 | 0.958994  | 0.874741  | 0.282111 | 1 KMT2B         | -      |
| ENSG00000053918 | 0.889177  | 0.902853  | 0.282111 | 1 KCNQ1         | K04926 |
| ENSG00000175879 | 0.889177  | 0.902853  | 0.282111 | 1 HOXD8         | K09308 |
| ENSG00000220804 | 0.889177  | 0.902853  | 0.282111 | 1 AC093642.5    | K16941 |
| ENSG00000255455 | 0.889177  | 0.902853  | 0.282111 | 1 RP11-890B15.3 | -      |
| ENSG00000008226 | 1.951624  | -1.267408 | 0.282609 | 1 DLEC1         | K15696 |
| ENSG00000057593 | 1.951624  | -1.267408 | 0.282609 | 1 F7            | K01320 |
| ENSG00000075886 | 1.951624  | -1.267408 | 0.282609 | 1 TUBA3D        | K07374 |
| ENSG00000091844 | 1.951624  | -1.267408 | 0.282609 | 1 RGS17         | K16449 |
| ENSG00000104888 | 1.951624  | -1.267408 | 0.282609 | 1 SLC17A7       | K12302 |
| ENSG00000109061 | 1.951624  | -1.267408 | 0.282609 | 1 MYH1          | K10352 |

|                 |           |           |          |                  |        |
|-----------------|-----------|-----------|----------|------------------|--------|
| ENSG00000115718 | 1.951624  | -1.267408 | 0.282609 | 1 PROC           | K01344 |
| ENSG00000127588 | 1.951624  | -1.267408 | 0.282609 | 1 GNG13          | K04547 |
| ENSG00000143199 | 1.951624  | -1.267408 | 0.282609 | 1 ADCY10         | K11265 |
| ENSG00000151892 | 1.951624  | -1.267408 | 0.282609 | 1 GFRA1          | -      |
| ENSG00000167748 | 1.951624  | -1.267408 | 0.282609 | 1 KLK1           | K01325 |
| ENSG00000171747 | 1.951624  | -1.267408 | 0.282609 | 1 LGALS4         | K10091 |
| ENSG00000178342 | 1.951624  | -1.267408 | 0.282609 | 1 KCNG2          | K04901 |
| ENSG00000187554 | 1.951624  | -1.267408 | 0.282609 | 1 TLR5           | K10168 |
| ENSG00000196644 | 1.951624  | -1.267408 | 0.282609 | 1 GPR89C         | -      |
| ENSG00000197181 | 1.951624  | -1.267408 | 0.282609 | 1 PIWIL2         | K02156 |
| ENSG00000207146 | 1.951624  | -1.267408 | 0.282609 | 1 Y_RNA          | -      |
| ENSG00000213609 | 1.951624  | -1.267408 | 0.282609 | 1 RP11-170M17.2  | K02936 |
| ENSG00000214188 | 1.951624  | -1.267408 | 0.282609 | 1 ST7-OT4        | -      |
| ENSG00000215105 | 1.951624  | -1.267408 | 0.282609 | 1 TTC3P1         | K15712 |
| ENSG00000222898 | 1.951624  | -1.267408 | 0.282609 | 1 RN7SKP97       | -      |
| ENSG00000224688 | 1.951624  | -1.267408 | 0.282609 | 1 KB-1592A4.13   | K09390 |
| ENSG00000228251 | 1.951624  | -1.267408 | 0.282609 | 1 AC012442.6     | -      |
| ENSG00000230076 | 1.951624  | -1.267408 | 0.282609 | 1 AC016708.2     | K02866 |
| ENSG00000232004 | 1.951624  | -1.267408 | 0.282609 | 1 CAP1P2         | K17261 |
| ENSG00000232355 | 1.951624  | -1.267408 | 0.282609 | 1 RP11-263F14.3  | K10104 |
| ENSG00000232987 | 1.951624  | -1.267408 | 0.282609 | 1 AC051649.6     | -      |
| ENSG00000233087 | 1.951624  | -1.267408 | 0.282609 | 1 AC073869.1     | K07895 |
| ENSG00000237082 | 1.951624  | -1.267408 | 0.282609 | 1 COX5BP6        | K02265 |
| ENSG00000237505 | 1.951624  | -1.267408 | 0.282609 | 1 RP11-76N22.2   | -      |
| ENSG00000238133 | 1.951624  | -1.267408 | 0.282609 | 1 MLK7-AS1       | -      |
| ENSG00000241782 | 1.951624  | -1.267408 | 0.282609 | 1 RP11-91P24.1   | K02889 |
| ENSG00000248240 | 1.951624  | -1.267408 | 0.282609 | 1 RP11-159F24.5  | -      |
| ENSG00000255007 | 1.951624  | -1.267408 | 0.282609 | 1 CTD-2589M5.4   | -      |
| ENSG00000259243 | 1.951624  | -1.267408 | 0.282609 | 1 GOLGA6L19      | -      |
| ENSG00000260025 | 1.951624  | -1.267408 | 0.282609 | 1 RP11-490M8.1   | -      |
| ENSG00000265185 | 1.951624  | -1.267408 | 0.282609 | 1 SNORD3B-1      | -      |
| ENSG00000269028 | 1.951624  | -1.267408 | 0.282609 | 1 MTRNR2L12      | K01982 |
| ENSG00000269235 | 1.951624  | -1.267408 | 0.282609 | 1 HCCAT3         | -      |
| ENSG00000269619 | 1.951624  | -1.267408 | 0.282609 | 1 CTD-3023J11.2  | -      |
| ENSG00000269915 | 1.951624  | -1.267408 | 0.282609 | 1 AP006621.9     | -      |
| ENSG00000269956 | 1.951624  | -1.267408 | 0.282609 | 1 MKNK1-AS1      | -      |
| ENSG00000269997 | 1.951624  | -1.267408 | 0.282609 | 1 RP11-214K3.21  | -      |
| ENSG00000270419 | 1.951624  | -1.267408 | 0.282609 | 1 CAHM           | -      |
| ENSG00000272072 | 1.951624  | -1.267408 | 0.282609 | 1 CTA-363E19.2   | -      |
| ENSG00000272953 | 1.951624  | -1.267408 | 0.282609 | 1 RP11-1275H24.2 | -      |
| ENSG00000273394 | 1.951624  | -1.267408 | 0.282609 | 1 RP11-255E6.6   | -      |
| ENSG00000118960 | 0.726484  | 4.106227  | 0.282672 | 1 HS1BP3         | K04678 |
| ENSG00000230061 | 0.795887  | 2.109087  | 0.282957 | 1 AP001065.2     | -      |
| ENSG00000099875 | 0.706982  | 7.634239  | 0.282983 | 1 MKNK2          | K04372 |
| ENSG00000182325 | -0.74945  | 3.280128  | 0.283342 | 1 FBXL6          | K10272 |
| ENSG00000211448 | 0.708129  | 6.795507  | 0.283352 | 1 DIO2           | K17904 |
| ENSG00000151967 | -1.438997 | -0.103742 | 0.283653 | 1 SCHIP1         | -      |
| ENSG00000224950 | -1.438997 | -0.103742 | 0.283653 | 1 RP5-1086K13.1  | -      |
| ENSG00000227992 | -1.438997 | -0.103742 | 0.283653 | 1 AC108463.2     | -      |
| ENSG00000237862 | -1.438997 | -0.103742 | 0.283653 | 1 RP1-63G5.7     | -      |
| ENSG00000244274 | -1.438997 | -0.103742 | 0.283653 | 1 DBNDD2         | -      |
| ENSG00000260643 | -1.438997 | -0.103742 | 0.283653 | 1 RP11-303E16.8  | -      |
| ENSG00000261052 | -1.438997 | -0.103742 | 0.283653 | 1 SULT1A3        | K01014 |
| ENSG00000272091 | -1.438997 | -0.103742 | 0.283653 | 1 RP4-758J24.5   | -      |
| ENSG00000273271 | -1.438997 | -0.103742 | 0.283653 | 1 AP000254.8     | -      |
| ENSG00000080573 | 1.380255  | -0.243739 | 0.283653 | 1 COL5A3         | K19721 |
| ENSG00000143226 | 1.380255  | -0.243739 | 0.283653 | 1 FCGR2A         | K06472 |
| ENSG00000154025 | 1.380255  | -0.243739 | 0.283653 | 1 SLC5A10        | K14390 |

|                 |           |           |          |                   |        |
|-----------------|-----------|-----------|----------|-------------------|--------|
| ENSG00000160460 | 1.380255  | -0.243739 | 0.283653 | 1 SPTBN4          | K06115 |
| ENSG00000169246 | 1.380255  | -0.243739 | 0.283653 | 1 NPIPB3          | -      |
| ENSG00000181790 | 1.380255  | -0.243739 | 0.283653 | 1 BAI1            | K04596 |
| ENSG00000226200 | 1.380255  | -0.243739 | 0.283653 | 1 RP11-50E11.3    | -      |
| ENSG00000228120 | 1.380255  | -0.243739 | 0.283653 | 1 AP001631.10     | -      |
| ENSG00000233101 | 1.380255  | -0.243739 | 0.283653 | 1 HOXB-AS3        | -      |
| ENSG00000254632 | 1.380255  | -0.243739 | 0.283653 | 1 RP11-21L23.4    | -      |
| ENSG00000259349 | 1.380255  | -0.243739 | 0.283653 | 1 RP11-15E18.1    | -      |
| ENSG00000261118 | 1.380255  | -0.243739 | 0.283653 | 1 RP11-104N10.1   | -      |
| ENSG00000269125 | 1.380255  | -0.243739 | 0.283653 | 1 RP11-98F14.11   | -      |
| ENSG00000164776 | 1.191847  | -0.180035 | 0.283653 | 1 PHKG1           | K00871 |
| ENSG00000215790 | 1.191847  | -0.180035 | 0.283653 | 1 SLC35E2         | K15284 |
| ENSG00000231203 | 1.191847  | -0.180035 | 0.283653 | 1 KRT8P10         | K07605 |
| ENSG00000238268 | 1.191847  | -0.180035 | 0.283653 | 1 RP11-229P13.19  | -      |
| ENSG00000240758 | 1.191847  | -0.180035 | 0.283653 | 1 RP11-155G14.6   | -      |
| ENSG00000259448 | 1.191847  | -0.180035 | 0.283653 | 1 RP11-16E12.1    | -      |
| ENSG00000260160 | 1.191847  | -0.180035 | 0.283653 | 1 CTC-471J1.2     | -      |
| ENSG00000266983 | 1.191847  | -0.180035 | 0.283653 | 1 CTC-232P5.1     | -      |
| ENSG00000180914 | -1.099004 | 0.690753  | 0.283853 | 1 OXTR            | K04229 |
| ENSG00000054965 | 0.714551  | 5.2851    | 0.28388  | 1 FAM168A         | -      |
| ENSG00000134243 | 0.713132  | 5.767737  | 0.284008 | 1 SORT1           | K12388 |
| ENSG00000214013 | -0.748755 | 3.229622  | 0.284121 | 1 GANC            | -      |
| ENSG00000157557 | 0.703683  | 8.552279  | 0.284531 | 1 ETS2            | K02678 |
| ENSG00000175931 | 0.713325  | 5.37795   | 0.284618 | 1 UBE2O           | K10581 |
| ENSG00000185024 | 0.720093  | 4.636582  | 0.285047 | 1 BRF1            | K15196 |
| ENSG00000197467 | -0.824364 | 2.341621  | 0.285106 | 1 COL13A1         | K16617 |
| ENSG00000117360 | -1.210811 | 0.348557  | 0.285115 | 1 PRPF3           | K12843 |
| ENSG00000214050 | -1.210811 | 0.348557  | 0.285115 | 1 FBXO16          | K10299 |
| ENSG00000236778 | -1.210811 | 0.348557  | 0.285115 | 1 INTS6-AS1       | -      |
| ENSG00000272752 | -1.210811 | 0.348557  | 0.285115 | 1 STAG3L5P-PVRIG2 | -      |
| ENSG00000183971 | 1.028602  | 0.24023   | 0.285115 | 1 NPW             | -      |
| ENSG00000235720 | 1.028602  | 0.24023   | 0.285115 | 1 RP11-340I6.6    | K09441 |
| ENSG00000236782 | 1.028602  | 0.24023   | 0.285115 | 1 RP11-96L14.7    | -      |
| ENSG00000244306 | -0.883527 | 1.536294  | 0.285285 | 1 CTD-2314B22.3   | -      |
| ENSG00000203709 | 0.842877  | 1.454637  | 0.285285 | 1 Clorf132        | -      |
| ENSG00000229097 | 0.842877  | 1.454637  | 0.285285 | 1 CALM2P2         | K02183 |
| ENSG00000116016 | 0.702855  | 7.868571  | 0.285559 | 1 EPAS1           | K09095 |
| ENSG00000005187 | 4.668855  | -2.01648  | 0.285714 | 1 ACSM3           | K01896 |
| ENSG00000031081 | 4.668855  | -2.01648  | 0.285714 | 1 ARHGAP31        | -      |
| ENSG00000070031 | 4.668855  | -2.01648  | 0.285714 | 1 SCT             | K05263 |
| ENSG00000071242 | 4.668855  | -2.01648  | 0.285714 | 1 RPS6KA2         | K04373 |
| ENSG00000091879 | 4.668855  | -2.01648  | 0.285714 | 1 ANGPT2          | K05466 |
| ENSG00000099985 | 4.668855  | -2.01648  | 0.285714 | 1 OSM             | K05418 |
| ENSG00000100146 | 4.668855  | -2.01648  | 0.285714 | 1 SOX10           | K09270 |
| ENSG00000104413 | 4.668855  | -2.01648  | 0.285714 | 1 ESRP1           | K14947 |
| ENSG00000104432 | 4.668855  | -2.01648  | 0.285714 | 1 IL7             | K05431 |
| ENSG00000104808 | 4.668855  | -2.01648  | 0.285714 | 1 DHDH            | K00078 |
| ENSG00000108947 | 4.668855  | -2.01648  | 0.285714 | 1 EFN3            | K05463 |
| ENSG00000111186 | 4.668855  | -2.01648  | 0.285714 | 1 WNT5B           | K00444 |
| ENSG00000115590 | 4.668855  | -2.01648  | 0.285714 | 1 IL1R2           | K04387 |
| ENSG00000115956 | 4.668855  | -2.01648  | 0.285714 | 1 PLEK            | -      |
| ENSG00000116783 | 4.668855  | -2.01648  | 0.285714 | 1 TNNT3K          | K17535 |
| ENSG00000120088 | 4.668855  | -2.01648  | 0.285714 | 1 CRHR1           | K04578 |
| ENSG00000121594 | 4.668855  | -2.01648  | 0.285714 | 1 CD80            | K05412 |
| ENSG00000122420 | 4.668855  | -2.01648  | 0.285714 | 1 PTGFR           | K04262 |
| ENSG00000124103 | 4.668855  | -2.01648  | 0.285714 | 1 FAM209A         | -      |
| ENSG00000124212 | 4.668855  | -2.01648  | 0.285714 | 1 PTGIS           | K01831 |
| ENSG00000124749 | 4.668855  | -2.01648  | 0.285714 | 1 COL21A1         | K16629 |

|                 |          |          |          |             |        |
|-----------------|----------|----------|----------|-------------|--------|
| ENSG00000125631 | 4.668855 | -2.01648 | 0.285714 | 1 HTR5BP    | K04161 |
| ENSG00000125872 | 4.668855 | -2.01648 | 0.285714 | 1 LRRN4     | -      |
| ENSG00000125965 | 4.668855 | -2.01648 | 0.285714 | 1 GDF5      | K04664 |
| ENSG00000128606 | 4.668855 | -2.01648 | 0.285714 | 1 LRRC17    | K10279 |
| ENSG00000129455 | 4.668855 | -2.01648 | 0.285714 | 1 KLK8      | K08650 |
| ENSG00000129596 | 4.668855 | -2.01648 | 0.285714 | 1 CDO1      | K00456 |
| ENSG00000131203 | 4.668855 | -2.01648 | 0.285714 | 1 IDO1      | K00463 |
| ENSG00000132693 | 4.668855 | -2.01648 | 0.285714 | 1 CRP       | K16143 |
| ENSG00000133665 | 4.668855 | -2.01648 | 0.285714 | 1 DYDC2     | -      |
| ENSG00000134007 | 4.668855 | -2.01648 | 0.285714 | 1 ADAM20    | K08609 |
| ENSG00000135960 | 4.668855 | -2.01648 | 0.285714 | 1 EDAR      | K05162 |
| ENSG00000137078 | 4.668855 | -2.01648 | 0.285714 | 1 SIT1      | -      |
| ENSG00000137225 | 4.668855 | -2.01648 | 0.285714 | 1 CAPN11    | K08580 |
| ENSG00000137642 | 4.668855 | -2.01648 | 0.285714 | 1 SORL1     | -      |
| ENSG00000138079 | 4.668855 | -2.01648 | 0.285714 | 1 SLC3A1    | K14210 |
| ENSG00000139193 | 4.668855 | -2.01648 | 0.285714 | 1 CD27      | K05144 |
| ENSG00000140931 | 4.668855 | -2.01648 | 0.285714 | 1 CMTM3     | -      |
| ENSG00000143119 | 4.668855 | -2.01648 | 0.285714 | 1 CD53      | K06489 |
| ENSG00000143556 | 4.668855 | -2.01648 | 0.285714 | 1 S100A7    | -      |
| ENSG00000144369 | 4.668855 | -2.01648 | 0.285714 | 1 FAM171B   | -      |
| ENSG00000147123 | 4.668855 | -2.01648 | 0.285714 | 1 NDUFB11   | K11351 |
| ENSG00000152076 | 4.668855 | -2.01648 | 0.285714 | 1 CCDC74B   | -      |
| ENSG00000153802 | 4.668855 | -2.01648 | 0.285714 | 1 TMPRSS11D | K09641 |
| ENSG00000154678 | 4.668855 | -2.01648 | 0.285714 | 1 PDE1C     | K13755 |
| ENSG00000155530 | 4.668855 | -2.01648 | 0.285714 | 1 LRGUK     | -      |
| ENSG00000155754 | 4.668855 | -2.01648 | 0.285714 | 1 ALS2CR11  | -      |
| ENSG00000157927 | 4.668855 | -2.01648 | 0.285714 | 1 RADIL     | -      |
| ENSG00000158428 | 4.668855 | -2.01648 | 0.285714 | 1 C2orf62   | -      |
| ENSG00000158486 | 4.668855 | -2.01648 | 0.285714 | 1 DNAH3     | K10408 |
| ENSG00000159871 | 4.668855 | -2.01648 | 0.285714 | 1 LYPD5     | -      |
| ENSG00000162592 | 4.668855 | -2.01648 | 0.285714 | 1 CCDC27    | -      |
| ENSG00000162728 | 4.668855 | -2.01648 | 0.285714 | 1 KCNJ9     | K05002 |
| ENSG00000163431 | 4.668855 | -2.01648 | 0.285714 | 1 LMOD1     | -      |
| ENSG00000163531 | 4.668855 | -2.01648 | 0.285714 | 1 NFASC     | K06757 |
| ENSG00000164122 | 4.668855 | -2.01648 | 0.285714 | 1 ASB5      | K10327 |
| ENSG00000165240 | 4.668855 | -2.01648 | 0.285714 | 1 ATP7A     | K17686 |
| ENSG00000165409 | 4.668855 | -2.01648 | 0.285714 | 1 TSHR      | K04249 |
| ENSG00000165617 | 4.668855 | -2.01648 | 0.285714 | 1 DACT1     | -      |
| ENSG00000167371 | 4.668855 | -2.01648 | 0.285714 | 1 PRRT2     | -      |
| ENSG00000168135 | 4.668855 | -2.01648 | 0.285714 | 1 KCNJ4     | K04998 |
| ENSG00000168824 | 4.668855 | -2.01648 | 0.285714 | 1 NSG1      | -      |
| ENSG00000170374 | 4.668855 | -2.01648 | 0.285714 | 1 SP7       | K09197 |
| ENSG00000170615 | 4.668855 | -2.01648 | 0.285714 | 1 SLC26A5   | K14703 |
| ENSG00000170703 | 4.668855 | -2.01648 | 0.285714 | 1 TTLL6     | K16582 |
| ENSG00000171217 | 4.668855 | -2.01648 | 0.285714 | 1 CLDN20    | K06087 |
| ENSG00000171860 | 4.668855 | -2.01648 | 0.285714 | 1 C3AR1     | K04009 |
| ENSG00000172005 | 4.668855 | -2.01648 | 0.285714 | 1 MAL       | -      |
| ENSG00000172350 | 4.668855 | -2.01648 | 0.285714 | 1 ABCG4     | K05680 |
| ENSG00000172967 | 4.668855 | -2.01648 | 0.285714 | 1 XKR3      | -      |
| ENSG00000173809 | 4.668855 | -2.01648 | 0.285714 | 1 TDRD12    | K18409 |
| ENSG00000173826 | 4.668855 | -2.01648 | 0.285714 | 1 KCNH6     | K04909 |
| ENSG00000173917 | 4.668855 | -2.01648 | 0.285714 | 1 HOXB2     | K09302 |
| ENSG00000176358 | 4.668855 | -2.01648 | 0.285714 | 1 TAC4      | K05241 |
| ENSG00000176761 | 4.668855 | -2.01648 | 0.285714 | 1 ZNF285B   | K09228 |
| ENSG00000177098 | 4.668855 | -2.01648 | 0.285714 | 1 SCN4B     | K04848 |
| ENSG00000178734 | 4.668855 | -2.01648 | 0.285714 | 1 C13orf45  | -      |
| ENSG00000178809 | 4.668855 | -2.01648 | 0.285714 | 1 TRIM73    | K12024 |
| ENSG00000179902 | 4.668855 | -2.01648 | 0.285714 | 1 C1orf194  | -      |

|                 |          |          |          |                 |        |
|-----------------|----------|----------|----------|-----------------|--------|
| ENSG00000180019 | 4.668855 | -2.01648 | 0.285714 | 1 AC079741.2    | K02977 |
| ENSG00000180043 | 4.668855 | -2.01648 | 0.285714 | 1 FAM71E2       | -      |
| ENSG00000180539 | 4.668855 | -2.01648 | 0.285714 | 1 C9orf139      | K17985 |
| ENSG00000182376 | 4.668855 | -2.01648 | 0.285714 | 1 RP5-1142A6.8  | -      |
| ENSG00000182404 | 4.668855 | -2.01648 | 0.285714 | 1 RP1-86D1.3    | -      |
| ENSG00000182450 | 4.668855 | -2.01648 | 0.285714 | 1 KCNK4         | K04915 |
| ENSG00000183798 | 4.668855 | -2.01648 | 0.285714 | 1 EMILIN3       | -      |
| ENSG00000186868 | 4.668855 | -2.01648 | 0.285714 | 1 MAPT          | K04380 |
| ENSG00000187808 | 4.668855 | -2.01648 | 0.285714 | 1 SOWAHD        | -      |
| ENSG00000188001 | 4.668855 | -2.01648 | 0.285714 | 1 TPRG1         | -      |
| ENSG00000188573 | 4.668855 | -2.01648 | 0.285714 | 1 FBLL1         | K14563 |
| ENSG00000188662 | 4.668855 | -2.01648 | 0.285714 | 1 HILS1         | -      |
| ENSG00000188771 | 4.668855 | -2.01648 | 0.285714 | 1 PLET1         | -      |
| ENSG00000188850 | 4.668855 | -2.01648 | 0.285714 | 1 RP11-159F24.2 | K02942 |
| ENSG00000197054 | 4.668855 | -2.01648 | 0.285714 | 1 ZNF763        | K09228 |
| ENSG00000197249 | 4.668855 | -2.01648 | 0.285714 | 1 SERPINA1      | K03984 |
| ENSG00000197604 | 4.668855 | -2.01648 | 0.285714 | 1 AC022532.1    | K04666 |
| ENSG00000197880 | 4.668855 | -2.01648 | 0.285714 | 1 MDS2          | K09228 |
| ENSG00000198711 | 4.668855 | -2.01648 | 0.285714 | 1 SSBP3-AS1     | -      |
| ENSG00000198939 | 4.668855 | -2.01648 | 0.285714 | 1 ZFP2          | K09228 |
| ENSG00000199177 | 4.668855 | -2.01648 | 0.285714 | 1 MIR31         | -      |
| ENSG00000199179 | 4.668855 | -2.01648 | 0.285714 | 1 MIRLET7I      | -      |
| ENSG00000199719 | 4.668855 | -2.01648 | 0.285714 | 1 RN7SKP74      | -      |
| ENSG00000199815 | 4.668855 | -2.01648 | 0.285714 | 1 SNORA43       | -      |
| ENSG00000200959 | 4.668855 | -2.01648 | 0.285714 | 1 SNORA74A      | -      |
| ENSG00000201544 | 4.668855 | -2.01648 | 0.285714 | 1 SNORA16B      | -      |
| ENSG00000201581 | 4.668855 | -2.01648 | 0.285714 | 1 RN7SKP78      | -      |
| ENSG00000201684 | 4.668855 | -2.01648 | 0.285714 | 1 RN7SKP239     | -      |
| ENSG00000202417 | 4.668855 | -2.01648 | 0.285714 | 1 Y_RNA         | -      |
| ENSG00000203433 | 4.668855 | -2.01648 | 0.285714 | 1 AC008147.2    | K09228 |
| ENSG00000203520 | 4.668855 | -2.01648 | 0.285714 | 1 RP11-697H9.3  | -      |
| ENSG00000204380 | 4.668855 | -2.01648 | 0.285714 | 1 AC005042.4    | -      |
| ENSG00000205177 | 4.668855 | -2.01648 | 0.285714 | 1 C11orf91      | -      |
| ENSG00000205274 | 4.668855 | -2.01648 | 0.285714 | 1 TRBV20OR9-2   | -      |
| ENSG00000205863 | 4.668855 | -2.01648 | 0.285714 | 1 C1QTNF9B      | -      |
| ENSG00000206181 | 4.668855 | -2.01648 | 0.285714 | 1 TCEB3B        | K15076 |
| ENSG00000206532 | 4.668855 | -2.01648 | 0.285714 | 1 RP11-553A10.1 | -      |
| ENSG00000207380 | 4.668855 | -2.01648 | 0.285714 | 1 Y_RNA         | -      |
| ENSG00000207839 | 4.668855 | -2.01648 | 0.285714 | 1 MIR33B        | -      |
| ENSG00000211683 | 4.668855 | -2.01648 | 0.285714 | 1 KB-1572G7.3   | -      |
| ENSG00000213253 | 4.668855 | -2.01648 | 0.285714 | 1 CTC-250I14.1  | K02870 |
| ENSG00000213277 | 4.668855 | -2.01648 | 0.285714 | 1 MARCKSL1P1    | K13536 |
| ENSG00000213376 | 4.668855 | -2.01648 | 0.285714 | 1 GAPDHP71      | K00134 |
| ENSG00000213409 | 4.668855 | -2.01648 | 0.285714 | 1 RP11-658F2.3  | K15414 |
| ENSG00000213519 | 4.668855 | -2.01648 | 0.285714 | 1 AC132008.1    | K02920 |
| ENSG00000214128 | 4.668855 | -2.01648 | 0.285714 | 1 TMEM213       | K12581 |
| ENSG00000214772 | 4.668855 | -2.01648 | 0.285714 | 1 RP11-174G6.1  | -      |
| ENSG00000215014 | 4.668855 | -2.01648 | 0.285714 | 1 AL645728.1    | K17985 |
| ENSG00000216613 | 4.668855 | -2.01648 | 0.285714 | 1 RP3-406A7.5   | K01922 |
| ENSG00000216636 | 4.668855 | -2.01648 | 0.285714 | 1 RPL7P25       | K02937 |
| ENSG00000217527 | 4.668855 | -2.01648 | 0.285714 | 1 RPS16P5       | K02960 |
| ENSG00000219642 | 4.668855 | -2.01648 | 0.285714 | 1 Bmpr1aps1     | K04673 |
| ENSG00000221387 | 4.668855 | -2.01648 | 0.285714 | 1 RNU6ATAC8P    | -      |
| ENSG00000221971 | 4.668855 | -2.01648 | 0.285714 | 1 TTC4P1        | -      |
| ENSG00000222177 | 4.668855 | -2.01648 | 0.285714 | 1 RNU4-30P      | -      |
| ENSG00000222503 | 4.668855 | -2.01648 | 0.285714 | 1 Y_RNA         | -      |
| ENSG00000223474 | 4.668855 | -2.01648 | 0.285714 | 1 AL020996.1    | -      |
| ENSG00000223779 | 4.668855 | -2.01648 | 0.285714 | 1 RP11-403I13.4 | -      |



|                 |          |          |          |                 |        |
|-----------------|----------|----------|----------|-----------------|--------|
| ENSG00000224072 | 4.668855 | -2.01648 | 0.285714 | 1 RP11-75A9.3   | -      |
| ENSG00000224676 | 4.668855 | -2.01648 | 0.285714 | 1 AP000351.8    | K00799 |
| ENSG00000224721 | 4.668855 | -2.01648 | 0.285714 | 1 AC007182.6    | -      |
| ENSG00000225043 | 4.668855 | -2.01648 | 0.285714 | 1 RPL18AP2      | -      |
| ENSG00000225193 | 4.668855 | -2.01648 | 0.285714 | 1 RPS12P26      | K02951 |
| ENSG00000225505 | 4.668855 | -2.01648 | 0.285714 | 1 RP11-330C7.3  | K07059 |
| ENSG00000225637 | 4.668855 | -2.01648 | 0.285714 | 1 AP001046.6    | -      |
| ENSG00000225674 | 4.668855 | -2.01648 | 0.285714 | 1 IPO7P2        | K18755 |
| ENSG00000225711 | 4.668855 | -2.01648 | 0.285714 | 1 RP11-345I18.4 | K00719 |
| ENSG00000226145 | 4.668855 | -2.01648 | 0.285714 | 1 AC022596.6    | K07604 |
| ENSG00000226148 | 4.668855 | -2.01648 | 0.285714 | 1 SLC25A39P1    | K15119 |
| ENSG00000227191 | 4.668855 | -2.01648 | 0.285714 | 1 TRGC2         | -      |
| ENSG00000227200 | 4.668855 | -2.01648 | 0.285714 | 1 RP11-121A14.3 | -      |
| ENSG00000227307 | 4.668855 | -2.01648 | 0.285714 | 1 RP11-95I16.2  | -      |
| ENSG00000227388 | 4.668855 | -2.01648 | 0.285714 | 1 RP11-112J3.16 | -      |
| ENSG00000227528 | 4.668855 | -2.01648 | 0.285714 | 1 DIAPH3-AS1    | -      |
| ENSG00000227844 | 4.668855 | -2.01648 | 0.285714 | 1 RP13-143G15.3 | -      |
| ENSG00000228146 | 4.668855 | -2.01648 | 0.285714 | 1 CASP16        | -      |
| ENSG00000228172 | 4.668855 | -2.01648 | 0.285714 | 1 RP1-317E23.3  | -      |
| ENSG00000228237 | 4.668855 | -2.01648 | 0.285714 | 1 EFCAB14-AS1   | -      |
| ENSG00000228742 | 4.668855 | -2.01648 | 0.285714 | 1 RP5-884M6.1   | -      |
| ENSG00000228828 | 4.668855 | -2.01648 | 0.285714 | 1 RP11-162G10.1 | K08864 |
| ENSG00000228940 | 4.668855 | -2.01648 | 0.285714 | 1 RP11-348A7.1  | K04382 |
| ENSG00000229052 | 4.668855 | -2.01648 | 0.285714 | 1 RP11-386I23.1 | -      |
| ENSG00000229235 | 4.668855 | -2.01648 | 0.285714 | 1 RP11-8L18.3   | K02922 |
| ENSG00000229591 | 4.668855 | -2.01648 | 0.285714 | 1 RP5-981O7.2   | -      |
| ENSG00000229694 | 4.668855 | -2.01648 | 0.285714 | 1 RP11-305L7.6  | -      |
| ENSG00000230287 | 4.668855 | -2.01648 | 0.285714 | 1 RP11-305E17.4 | -      |
| ENSG00000230295 | 4.668855 | -2.01648 | 0.285714 | 1 RP11-458F8.2  | K03121 |
| ENSG00000230345 | 4.668855 | -2.01648 | 0.285714 | 1 RP13-455A7.1  | -      |
| ENSG00000230534 | 4.668855 | -2.01648 | 0.285714 | 1 RP11-297A16.2 | -      |
| ENSG00000230696 | 4.668855 | -2.01648 | 0.285714 | 1 AC011753.5    | -      |
| ENSG00000230964 | 4.668855 | -2.01648 | 0.285714 | 1 AC018696.4    | -      |
| ENSG00000230978 | 4.668855 | -2.01648 | 0.285714 | 1 LINC00160     | -      |
| ENSG00000231053 | 4.668855 | -2.01648 | 0.285714 | 1 RP13-26D14.2  | -      |
| ENSG00000231188 | 4.668855 | -2.01648 | 0.285714 | 1 RP11-34D15.2  | -      |
| ENSG00000231324 | 4.668855 | -2.01648 | 0.285714 | 1 AP000696.2    | -      |
| ENSG00000231414 | 4.668855 | -2.01648 | 0.285714 | 1 AC016700.6    | K02924 |
| ENSG00000231697 | 4.668855 | -2.01648 | 0.285714 | 1 NANOGP5       | K10164 |
| ENSG00000231704 | 4.668855 | -2.01648 | 0.285714 | 1 AC004895.4    | -      |
| ENSG00000231865 | 4.668855 | -2.01648 | 0.285714 | 1 SIK3-IT1      | -      |
| ENSG00000232031 | 4.668855 | -2.01648 | 0.285714 | 1 RP5-991C6.4   | -      |
| ENSG00000232237 | 4.668855 | -2.01648 | 0.285714 | 1 ASCL5         | K09067 |
| ENSG00000232406 | 4.668855 | -2.01648 | 0.285714 | 1 RP11-234K24.3 | -      |
| ENSG00000232578 | 4.668855 | -2.01648 | 0.285714 | 1 CTC-303L1.1   | -      |
| ENSG00000232762 | 4.668855 | -2.01648 | 0.285714 | 1 RP4-784A16.4  | -      |
| ENSG00000232850 | 4.668855 | -2.01648 | 0.285714 | 1 AL590708.2    | -      |
| ENSG00000233018 | 4.668855 | -2.01648 | 0.285714 | 1 RP4-597N16.1  | -      |
| ENSG00000233242 | 4.668855 | -2.01648 | 0.285714 | 1 RP11-220I1.2  | -      |
| ENSG00000233382 | 4.668855 | -2.01648 | 0.285714 | 1 NKAPP1        | -      |
| ENSG00000233623 | 4.668855 | -2.01648 | 0.285714 | 1 PGAM1P11      | K01834 |
| ENSG00000233668 | 4.668855 | -2.01648 | 0.285714 | 1 RP11-571F15.3 | K02995 |
| ENSG00000233797 | 4.668855 | -2.01648 | 0.285714 | 1 UFL1-AS1      | -      |
| ENSG00000233922 | 4.668855 | -2.01648 | 0.285714 | 1 AL133493.2    | -      |
| ENSG00000234134 | 4.668855 | -2.01648 | 0.285714 | 1 RP11-383C5.5  | -      |
| ENSG00000234144 | 4.668855 | -2.01648 | 0.285714 | 1 COX6CP13      | K02268 |
| ENSG00000234473 | 4.668855 | -2.01648 | 0.285714 | 1 ZNF101P2      | K09228 |
| ENSG00000234553 | 4.668855 | -2.01648 | 0.285714 | 1 AC022431.3    | -      |

|                 |          |          |          |                 |        |
|-----------------|----------|----------|----------|-----------------|--------|
| ENSG00000234773 | 4.668855 | -2.01648 | 0.285714 | 1 CTD-2666L21.1 | --     |
| ENSG00000234996 | 4.668855 | -2.01648 | 0.285714 | 1 RP11-480I12.7 | --     |
| ENSG00000235005 | 4.668855 | -2.01648 | 0.285714 | 1 RP11-195M16.1 | --     |
| ENSG00000235254 | 4.668855 | -2.01648 | 0.285714 | 1 TMEM185AP1    | --     |
| ENSG00000235806 | 4.668855 | -2.01648 | 0.285714 | 1 RP4-646N3.1   | --     |
| ENSG00000235940 | 4.668855 | -2.01648 | 0.285714 | 1 MTND1P21      | --     |
| ENSG00000235947 | 4.668855 | -2.01648 | 0.285714 | 1 EGOT          | --     |
| ENSG00000236022 | 4.668855 | -2.01648 | 0.285714 | 1 RP11-160E2.16 | --     |
| ENSG00000236065 | 4.668855 | -2.01648 | 0.285714 | 1 RP1-117O3.2   | --     |
| ENSG00000236091 | 4.668855 | -2.01648 | 0.285714 | 1 RP3-473B4.3   | --     |
| ENSG00000236258 | 4.668855 | -2.01648 | 0.285714 | 1 TIMM8BP1      | K17780 |
| ENSG00000236559 | 4.668855 | -2.01648 | 0.285714 | 1 RP11-243J16.7 | --     |
| ENSG00000236760 | 4.668855 | -2.01648 | 0.285714 | 1 AC019118.3    | --     |
| ENSG00000236935 | 4.668855 | -2.01648 | 0.285714 | 1 AP003774.1    | --     |
| ENSG00000237243 | 4.668855 | -2.01648 | 0.285714 | 1 AC022173.2    | --     |
| ENSG00000237815 | 4.668855 | -2.01648 | 0.285714 | 1 AC007000.11   | K08694 |
| ENSG00000237928 | 4.668855 | -2.01648 | 0.285714 | 1 RP4-668G5.1   | --     |
| ENSG00000238305 | 4.668855 | -2.01648 | 0.285714 | 1 snoU13        | --     |
| ENSG00000238343 | 4.668855 | -2.01648 | 0.285714 | 1 snoU13        | --     |
| ENSG00000238793 | 4.668855 | -2.01648 | 0.285714 | 1 SNORD124      | --     |
| ENSG00000238987 | 4.668855 | -2.01648 | 0.285714 | 1 RNU7-133P     | --     |
| ENSG00000239091 | 4.668855 | -2.01648 | 0.285714 | 1 snoU13        | --     |
| ENSG00000239219 | 4.668855 | -2.01648 | 0.285714 | 1 RP11-379K17.4 | --     |
| ENSG00000239272 | 4.668855 | -2.01648 | 0.285714 | 1 RPL21P10      | K02889 |
| ENSG00000239553 | 4.668855 | -2.01648 | 0.285714 | 1 RN7SL12P      | --     |
| ENSG00000239608 | 4.668855 | -2.01648 | 0.285714 | 1 RUVBL1-AS1    | --     |
| ENSG00000240160 | 4.668855 | -2.01648 | 0.285714 | 1 RN7SL263P     | --     |
| ENSG00000240553 | 4.668855 | -2.01648 | 0.285714 | 1 RP1-184J9.2   | --     |
| ENSG00000241030 | 4.668855 | -2.01648 | 0.285714 | 1 RPL29P24      | K02905 |
| ENSG00000241157 | 4.668855 | -2.01648 | 0.285714 | 1 RP11-3K24.1   | K02912 |
| ENSG00000241890 | 4.668855 | -2.01648 | 0.285714 | 1 RPL13P4       | --     |
| ENSG00000241954 | 4.668855 | -2.01648 | 0.285714 | 1 RP1-149A16.17 | --     |
| ENSG00000242017 | 4.668855 | -2.01648 | 0.285714 | 1 ALG1L15P      | K03842 |
| ENSG00000242267 | 4.668855 | -2.01648 | 0.285714 | 1 SKINTL        | --     |
| ENSG00000243000 | 4.668855 | -2.01648 | 0.285714 | 1 RP11-504P24.3 | K16944 |
| ENSG00000243870 | 4.668855 | -2.01648 | 0.285714 | 1 RN7SL236P     | --     |
| ENSG00000244018 | 4.668855 | -2.01648 | 0.285714 | 1 RPL35P6       | K02918 |
| ENSG00000244097 | 4.668855 | -2.01648 | 0.285714 | 1 RPS4XP17      | K02987 |
| ENSG00000244268 | 4.668855 | -2.01648 | 0.285714 | 1 RP11-529G21.2 | --     |
| ENSG00000244610 | 4.668855 | -2.01648 | 0.285714 | 1 RN7SL756P     | --     |
| ENSG00000244675 | 4.668855 | -2.01648 | 0.285714 | 1 AC108676.1    | --     |
| ENSG00000245059 | 4.668855 | -2.01648 | 0.285714 | 1 RP11-303E16.7 | --     |
| ENSG00000245729 | 4.668855 | -2.01648 | 0.285714 | 1 RP11-480D4.1  | --     |
| ENSG00000246250 | 4.668855 | -2.01648 | 0.285714 | 1 RP11-613D13.5 | --     |
| ENSG00000247624 | 4.668855 | -2.01648 | 0.285714 | 1 CPEB2-AS1     | --     |
| ENSG00000248223 | 4.668855 | -2.01648 | 0.285714 | 1 CTD-2139B15.2 | --     |
| ENSG00000249241 | 4.668855 | -2.01648 | 0.285714 | 1 AC195454.1    | --     |
| ENSG00000249840 | 4.668855 | -2.01648 | 0.285714 | 1 AC020947.2    | K00134 |
| ENSG00000249899 | 4.668855 | -2.01648 | 0.285714 | 1 CTD-2175A23.1 | --     |
| ENSG00000249908 | 4.668855 | -2.01648 | 0.285714 | 1 CTD-2589H19.4 | K11723 |
| ENSG00000250091 | 4.668855 | -2.01648 | 0.285714 | 1 DNAH10OS      | K10408 |
| ENSG00000250379 | 4.668855 | -2.01648 | 0.285714 | 1 RP11-23P13.4  | --     |
| ENSG00000250536 | 4.668855 | -2.01648 | 0.285714 | 1 ABHD17AP3     | --     |
| ENSG00000250635 | 4.668855 | -2.01648 | 0.285714 | 1 CTD-3224K15.2 | --     |
| ENSG00000251093 | 4.668855 | -2.01648 | 0.285714 | 1 RP11-414H23.3 | --     |
| ENSG00000251281 | 4.668855 | -2.01648 | 0.285714 | 1 CTD-2066L21.2 | --     |
| ENSG00000251552 | 4.668855 | -2.01648 | 0.285714 | 1 COQ10BP2      | K18588 |
| ENSG00000251577 | 4.668855 | -2.01648 | 0.285714 | 1 RP11-297P16.3 | --     |

|                 |          |          |          |                  |        |
|-----------------|----------|----------|----------|------------------|--------|
| ENSG00000251602 | 4.668855 | -2.01648 | 0.285714 | 1 RP11-521B24.3  | -      |
| ENSG00000251682 | 4.668855 | -2.01648 | 0.285714 | 1 RP11-631M6.3   | K18656 |
| ENSG00000251884 | 4.668855 | -2.01648 | 0.285714 | 1 RNA5SP288      | -      |
| ENSG00000251988 | 4.668855 | -2.01648 | 0.285714 | 1 RNU4ATAC18P    | -      |
| ENSG00000252893 | 4.668855 | -2.01648 | 0.285714 | 1 RNU7-58P       | -      |
| ENSG00000252943 | 4.668855 | -2.01648 | 0.285714 | 1 RNU6-264P      | -      |
| ENSG00000253256 | 4.668855 | -2.01648 | 0.285714 | 1 CTB-11I22.1    | -      |
| ENSG00000253615 | 4.668855 | -2.01648 | 0.285714 | 1 RP11-597M17.2  | -      |
| ENSG00000253676 | 4.668855 | -2.01648 | 0.285714 | 1 TAGLN2P1       | -      |
| ENSG00000254120 | 4.668855 | -2.01648 | 0.285714 | 1 RP11-705O24.2  | -      |
| ENSG00000254267 | 4.668855 | -2.01648 | 0.285714 | 1 KB-1458E12.1   | -      |
| ENSG00000254274 | 4.668855 | -2.01648 | 0.285714 | 1 TDGF1P5        | -      |
| ENSG00000254458 | 4.668855 | -2.01648 | 0.285714 | 1 RP11-867G23.13 | -      |
| ENSG00000254736 | 4.668855 | -2.01648 | 0.285714 | 1 RP11-867G23.9  | -      |
| ENSG00000254762 | 4.668855 | -2.01648 | 0.285714 | 1 RP11-867G23.2  | -      |
| ENSG00000255092 | 4.668855 | -2.01648 | 0.285714 | 1 RP11-58K22.4   | -      |
| ENSG00000255311 | 4.668855 | -2.01648 | 0.285714 | 1 RP11-160H12.2  | -      |
| ENSG00000256030 | 4.668855 | -2.01648 | 0.285714 | 1 CBX3P4         | K11586 |
| ENSG00000256176 | 4.668855 | -2.01648 | 0.285714 | 1 RP11-627K11.3  | K15105 |
| ENSG00000256243 | 4.668855 | -2.01648 | 0.285714 | 1 RPL7AP3        | K02936 |
| ENSG00000256250 | 4.668855 | -2.01648 | 0.285714 | 1 RP11-989F5.1   | -      |
| ENSG00000256287 | 4.668855 | -2.01648 | 0.285714 | 1 RP11-664H17.1  | -      |
| ENSG00000257219 | 4.668855 | -2.01648 | 0.285714 | 1 RP11-54A9.1    | -      |
| ENSG00000257354 | 4.668855 | -2.01648 | 0.285714 | 1 RP11-631N16.2  | -      |
| ENSG00000257526 | 4.668855 | -2.01648 | 0.285714 | 1 RP11-20E24.1   | -      |
| ENSG00000257588 | 4.668855 | -2.01648 | 0.285714 | 1 RP11-469H8.6   | -      |
| ENSG00000257851 | 4.668855 | -2.01648 | 0.285714 | 1 HNRNPA3P10     | K12741 |
| ENSG00000258611 | 4.668855 | -2.01648 | 0.285714 | 1 RP11-368J22.2  | K09277 |
| ENSG00000258689 | 4.668855 | -2.01648 | 0.285714 | 1 RP6-65G23.1    | -      |
| ENSG00000258821 | 4.668855 | -2.01648 | 0.285714 | 1 AC005041.17    | -      |
| ENSG00000258858 | 4.668855 | -2.01648 | 0.285714 | 1 RP11-982M15.5  | -      |
| ENSG00000258904 | 4.668855 | -2.01648 | 0.285714 | 1 RP11-638I2.2   | -      |
| ENSG00000259155 | 4.668855 | -2.01648 | 0.285714 | 1 RP11-831F12.3  | K08856 |
| ENSG00000259201 | 4.668855 | -2.01648 | 0.285714 | 1 RP11-56B16.5   | -      |
| ENSG00000259438 | 4.668855 | -2.01648 | 0.285714 | 1 CTD-2650P22.1  | -      |
| ENSG00000259531 | 4.668855 | -2.01648 | 0.285714 | 1 RP11-295H24.3  | K09596 |
| ENSG00000259571 | 4.668855 | -2.01648 | 0.285714 | 1 BLID           | -      |
| ENSG00000259573 | 4.668855 | -2.01648 | 0.285714 | 1 NMNAT1P5       | K06210 |
| ENSG00000259584 | 4.668855 | -2.01648 | 0.285714 | 1 RP11-521C20.2  | -      |
| ENSG00000259632 | 4.668855 | -2.01648 | 0.285714 | 1 RP11-56B16.1   | K14557 |
| ENSG00000259656 | 4.668855 | -2.01648 | 0.285714 | 1 RP11-325E5.1   | -      |
| ENSG00000260008 | 4.668855 | -2.01648 | 0.285714 | 1 RP11-732A21.2  | -      |
| ENSG00000260500 | 4.668855 | -2.01648 | 0.285714 | 1 CTD-3193O13.1  | -      |
| ENSG00000260589 | 4.668855 | -2.01648 | 0.285714 | 1 RP11-390B4.5   | -      |
| ENSG00000260635 | 4.668855 | -2.01648 | 0.285714 | 1 RP11-21M24.3   | -      |
| ENSG00000260908 | 4.668855 | -2.01648 | 0.285714 | 1 CTB-134H23.3   | K17985 |
| ENSG00000261251 | 4.668855 | -2.01648 | 0.285714 | 1 RP3-388M5.9    | -      |
| ENSG00000261252 | 4.668855 | -2.01648 | 0.285714 | 1 RP11-318L16.6  | -      |
| ENSG00000261334 | 4.668855 | -2.01648 | 0.285714 | 1 RP11-65J3.14   | -      |
| ENSG00000261528 | 4.668855 | -2.01648 | 0.285714 | 1 AC002400.1     | K18468 |
| ENSG00000261582 | 4.668855 | -2.01648 | 0.285714 | 1 RP4-614O4.11   | -      |
| ENSG00000261794 | 4.668855 | -2.01648 | 0.285714 | 1 GOLGA8H        | K10595 |
| ENSG00000261868 | 4.668855 | -2.01648 | 0.285714 | 1 RP11-104O19.2  | -      |
| ENSG00000262332 | 4.668855 | -2.01648 | 0.285714 | 1 RP11-517A5.7   | -      |
| ENSG00000262497 | 4.668855 | -2.01648 | 0.285714 | 1 FAM187B2P      | -      |
| ENSG00000262768 | 4.668855 | -2.01648 | 0.285714 | 1 RP11-353N14.1  | -      |
| ENSG00000263098 | 4.668855 | -2.01648 | 0.285714 | 1 RP11-567O16.1  | -      |
| ENSG00000263219 | 4.668855 | -2.01648 | 0.285714 | 1 RYKPI          | K05128 |

|                 |           |           |          |                    |        |
|-----------------|-----------|-----------|----------|--------------------|--------|
| ENSG00000263370 | 4.668855  | -2.01648  | 0.285714 | 1 RP11-68I3.5      | -      |
| ENSG00000263675 | 4.668855  | -2.01648  | 0.285714 | 1 MIR5581          | -      |
| ENSG00000264483 | 4.668855  | -2.01648  | 0.285714 | 1 MIR5008          | -      |
| ENSG00000265395 | 4.668855  | -2.01648  | 0.285714 | 1 MIR3944          | -      |
| ENSG00000266306 | 4.668855  | -2.01648  | 0.285714 | 1 CTD-2008P7.6     | -      |
| ENSG00000266498 | 4.668855  | -2.01648  | 0.285714 | 1 RP11-45M22.5     | -      |
| ENSG00000266533 | 4.668855  | -2.01648  | 0.285714 | 1 MIR3619          | -      |
| ENSG00000266642 | 4.668855  | -2.01648  | 0.285714 | 1 RP11-20B24.4     | -      |
| ENSG00000266826 | 4.668855  | -2.01648  | 0.285714 | 1 CTD-2200P10.1    | K17606 |
| ENSG00000266946 | 4.668855  | -2.01648  | 0.285714 | 1 MRPL37P1         | K17418 |
| ENSG00000267203 | 4.668855  | -2.01648  | 0.285714 | 1 SNRPGP4          | K11099 |
| ENSG00000267332 | 4.668855  | -2.01648  | 0.285714 | 1 CTD-2596O15.1    | -      |
| ENSG00000267370 | 4.668855  | -2.01648  | 0.285714 | 1 CTD-2623N2.3     | -      |
| ENSG00000267582 | 4.668855  | -2.01648  | 0.285714 | 1 CTD-3252C9.2     | -      |
| ENSG00000267659 | 4.668855  | -2.01648  | 0.285714 | 1 RP11-118B18.1    | -      |
| ENSG00000267724 | 4.668855  | -2.01648  | 0.285714 | 1 RP11-49K24.8     | -      |
| ENSG00000268742 | 4.668855  | -2.01648  | 0.285714 | 1 CTD-2396E7.7     | K04674 |
| ENSG00000268866 | 4.668855  | -2.01648  | 0.285714 | 1 AC020915.2       | -      |
| ENSG00000269058 | 4.668855  | -2.01648  | 0.285714 | 1 CALR3            | K10098 |
| ENSG00000269246 | 4.668855  | -2.01648  | 0.285714 | 1 CTC-246B18.10    | -      |
| ENSG00000269476 | 4.668855  | -2.01648  | 0.285714 | 1 CTD-2583A14.9    | K09228 |
| ENSG00000269516 | 4.668855  | -2.01648  | 0.285714 | 1 CYP4F23P         | K17726 |
| ENSG00000269578 | 4.668855  | -2.01648  | 0.285714 | 1 CTD-3222D19.5    | -      |
| ENSG00000269806 | 4.668855  | -2.01648  | 0.285714 | 1 CTD-3001H11.1    | -      |
| ENSG00000269901 | 4.668855  | -2.01648  | 0.285714 | 1 RP11-178L8.9     | -      |
| ENSG00000269961 | 4.668855  | -2.01648  | 0.285714 | 1 CTD-2033C11.1    | -      |
| ENSG00000270001 | 4.668855  | -2.01648  | 0.285714 | 1 RP11-218C14.8    | -      |
| ENSG00000270157 | 4.668855  | -2.01648  | 0.285714 | 1 RP5-894A10.6     | -      |
| ENSG00000270390 | 4.668855  | -2.01648  | 0.285714 | 1 RP11-470B22.1    | -      |
| ENSG00000270510 | 4.668855  | -2.01648  | 0.285714 | 1 RP11-777F6.3     | -      |
| ENSG00000270839 | 4.668855  | -2.01648  | 0.285714 | 1 CTC-571O20.1     | -      |
| ENSG00000270995 | 4.668855  | -2.01648  | 0.285714 | 1 RP11-29B11.5     | -      |
| ENSG00000271075 | 4.668855  | -2.01648  | 0.285714 | 1 RP11-589M4.4     | -      |
| ENSG00000271181 | 4.668855  | -2.01648  | 0.285714 | 1 CTA-221G9.10     | -      |
| ENSG00000271185 | 4.668855  | -2.01648  | 0.285714 | 1 RP5-855F16.1     | -      |
| ENSG00000271443 | 4.668855  | -2.01648  | 0.285714 | 1 RP11-541E12.1    | -      |
| ENSG00000271892 | 4.668855  | -2.01648  | 0.285714 | 1 CTD-2228A4.1     | -      |
| ENSG00000271993 | 4.668855  | -2.01648  | 0.285714 | 1 RP11-285J16.1    | -      |
| ENSG00000272057 | 4.668855  | -2.01648  | 0.285714 | 1 CTB-40H15.4      | -      |
| ENSG00000272102 | 4.668855  | -2.01648  | 0.285714 | 1 RP3-355L5.5      | -      |
| ENSG00000272202 | 4.668855  | -2.01648  | 0.285714 | 1 RP11-157F20.3    | -      |
| ENSG00000272226 | 4.668855  | -2.01648  | 0.285714 | 1 RP11-63G10.3     | -      |
| ENSG00000272573 | 4.668855  | -2.01648  | 0.285714 | 1 MUSTN1           | -      |
| ENSG00000272610 | 4.668855  | -2.01648  | 0.285714 | 1 MAGI1-IT1        | -      |
| ENSG00000272656 | 4.668855  | -2.01648  | 0.285714 | 1 RP11-219D15.3    | -      |
| ENSG00000272784 | 4.668855  | -2.01648  | 0.285714 | 1 RP11-335L23.5    | -      |
| ENSG00000272940 | 4.668855  | -2.01648  | 0.285714 | 1 CTA-384D8.33     | -      |
| ENSG00000272986 | 4.668855  | -2.01648  | 0.285714 | 1 RP11-46J23.1     | -      |
| ENSG00000273046 | 4.668855  | -2.01648  | 0.285714 | 1 RP11-834C11.14   | -      |
| ENSG00000273139 | 4.668855  | -2.01648  | 0.285714 | 1 XXbac-B444P24.14 | -      |
| ENSG00000273257 | 4.668855  | -2.01648  | 0.285714 | 1 RP11-177J6.1     | -      |
| ENSG00000005421 | -4.631531 | -1.658813 | 0.285714 | 1 PON1             | K01045 |
| ENSG00000019186 | -4.631531 | -1.658813 | 0.285714 | 1 CYP24A1          | K07436 |
| ENSG00000047644 | -4.631531 | -1.658813 | 0.285714 | 1 WWC3             | -      |
| ENSG00000047936 | -4.631531 | -1.658813 | 0.285714 | 1 ROS1             | K05088 |
| ENSG00000049323 | -4.631531 | -1.658813 | 0.285714 | 1 LTBP1            | K19559 |
| ENSG00000077935 | -4.631531 | -1.658813 | 0.285714 | 1 SMC1B            | K06636 |
| ENSG00000078795 | -4.631531 | -1.658813 | 0.285714 | 1 PKD2L2           | K04991 |

|                 |           |           |          |                  |        |
|-----------------|-----------|-----------|----------|------------------|--------|
| ENSG00000096996 | -4.631531 | -1.658813 | 0.285714 | 1 IL12RB1        | K05063 |
| ENSG00000102057 | -4.631531 | -1.658813 | 0.285714 | 1 KCND1          | K04891 |
| ENSG00000105261 | -4.631531 | -1.658813 | 0.285714 | 1 OVOL3          | K09216 |
| ENSG00000107611 | -4.631531 | -1.658813 | 0.285714 | 1 CUBN           | K14616 |
| ENSG00000114786 | -4.631531 | -1.658813 | 0.285714 | 1 ABHD14A-ACY1   | K14677 |
| ENSG00000121270 | -4.631531 | -1.658813 | 0.285714 | 1 ABCC11         | K05671 |
| ENSG00000121577 | -4.631531 | -1.658813 | 0.285714 | 1 POPDC2         | -      |
| ENSG00000124449 | -4.631531 | -1.658813 | 0.285714 | 1 IRGC           | -      |
| ENSG00000127325 | -4.631531 | -1.658813 | 0.285714 | 1 BEST3          | K13880 |
| ENSG00000129654 | -4.631531 | -1.658813 | 0.285714 | 1 FOXJ1          | K09402 |
| ENSG00000136918 | -4.631531 | -1.658813 | 0.285714 | 1 WDR38          | -      |
| ENSG00000149948 | -4.631531 | -1.658813 | 0.285714 | 1 HMGA2          | K09283 |
| ENSG00000152936 | -4.631531 | -1.658813 | 0.285714 | 1 IFLTD1         | -      |
| ENSG00000153993 | -4.631531 | -1.658813 | 0.285714 | 1 SEMA3D         | K06840 |
| ENSG00000158125 | -4.631531 | -1.658813 | 0.285714 | 1 XDH            | K00106 |
| ENSG00000158258 | -4.631531 | -1.658813 | 0.285714 | 1 CLSTN2         | K12581 |
| ENSG00000160767 | -4.631531 | -1.658813 | 0.285714 | 1 FAM189B        | -      |
| ENSG00000163017 | -4.631531 | -1.658813 | 0.285714 | 1 ACTG2          | K12315 |
| ENSG00000163932 | -4.631531 | -1.658813 | 0.285714 | 1 PRKCD          | K06068 |
| ENSG00000166920 | -4.631531 | -1.658813 | 0.285714 | 1 C15orf48       | -      |
| ENSG00000174885 | -4.631531 | -1.658813 | 0.285714 | 1 NLRP6          | -      |
| ENSG00000175315 | -4.631531 | -1.658813 | 0.285714 | 1 CST6           | K13902 |
| ENSG00000179388 | -4.631531 | -1.658813 | 0.285714 | 1 EGR3           | K12497 |
| ENSG00000183831 | -4.631531 | -1.658813 | 0.285714 | 1 ANKRD45        | K14726 |
| ENSG00000185739 | -4.631531 | -1.658813 | 0.285714 | 1 SRL            | K17985 |
| ENSG00000187689 | -4.631531 | -1.658813 | 0.285714 | 1 AMTN           | -      |
| ENSG00000188175 | -4.631531 | -1.658813 | 0.285714 | 1 HEPACAM2       | -      |
| ENSG00000189433 | -4.631531 | -1.658813 | 0.285714 | 1 GJB4           | K07623 |
| ENSG00000197635 | -4.631531 | -1.658813 | 0.285714 | 1 DPP4           | K01278 |
| ENSG00000198580 | -4.631531 | -1.658813 | 0.285714 | 1 AC073343.1     | K09228 |
| ENSG00000198846 | -4.631531 | -1.658813 | 0.285714 | 1 TOX            | -      |
| ENSG00000199846 | -4.631531 | -1.658813 | 0.285714 | 1 RNU1-72P       | -      |
| ENSG00000204666 | -4.631531 | -1.658813 | 0.285714 | 1 CTD-2126E3.1   | -      |
| ENSG00000205959 | -4.631531 | -1.658813 | 0.285714 | 1 RP11-689P11.2  | -      |
| ENSG00000206337 | -4.631531 | -1.658813 | 0.285714 | 1 HCP5           | -      |
| ENSG00000207151 | -4.631531 | -1.658813 | 0.285714 | 1 Y_RNA          | -      |
| ENSG00000207650 | -4.631531 | -1.658813 | 0.285714 | 1 MIR570         | -      |
| ENSG00000207973 | -4.631531 | -1.658813 | 0.285714 | 1 MIR589         | -      |
| ENSG00000214552 | -4.631531 | -1.658813 | 0.285714 | 1 COPS8P2        | K12181 |
| ENSG00000215456 | -4.631531 | -1.658813 | 0.285714 | 1 BCRP4          | K08878 |
| ENSG00000218772 | -4.631531 | -1.658813 | 0.285714 | 1 FAM8A6P        | -      |
| ENSG00000219027 | -4.631531 | -1.658813 | 0.285714 | 1 RPS3AP2        | -      |
| ENSG00000219298 | -4.631531 | -1.658813 | 0.285714 | 1 RP11-472G23.3  | K07986 |
| ENSG00000223198 | -4.631531 | -1.658813 | 0.285714 | 1 RNU2-22P       | -      |
| ENSG00000224063 | -4.631531 | -1.658813 | 0.285714 | 1 AC007319.1     | -      |
| ENSG00000224945 | -4.631531 | -1.658813 | 0.285714 | 1 RP11-82L18.2   | -      |
| ENSG00000225028 | -4.631531 | -1.658813 | 0.285714 | 1 RP11-330M19.1  | -      |
| ENSG00000225039 | -4.631531 | -1.658813 | 0.285714 | 1 LINC01058      | -      |
| ENSG00000225108 | -4.631531 | -1.658813 | 0.285714 | 1 ZBTB45P1       | K10516 |
| ENSG00000225450 | -4.631531 | -1.658813 | 0.285714 | 1 RP3-508I15.14  | -      |
| ENSG00000228157 | -4.631531 | -1.658813 | 0.285714 | 1 AC007952.5     | -      |
| ENSG00000228294 | -4.631531 | -1.658813 | 0.285714 | 1 BMS1P17        | -      |
| ENSG00000228485 | -4.631531 | -1.658813 | 0.285714 | 1 GRK5-IT1       | -      |
| ENSG00000229127 | -4.631531 | -1.658813 | 0.285714 | 1 AC007038.7     | -      |
| ENSG00000229852 | -4.631531 | -1.658813 | 0.285714 | 1 RP11-398K22.12 | -      |
| ENSG00000230091 | -4.631531 | -1.658813 | 0.285714 | 1 TMEM254-AS1    | -      |
| ENSG00000230712 | -4.631531 | -1.658813 | 0.285714 | 1 AP000354.4     | K18592 |
| ENSG00000230812 | -4.631531 | -1.658813 | 0.285714 | 1 RP4-794H19.4   | -      |

|                 |           |           |          |                  |        |
|-----------------|-----------|-----------|----------|------------------|--------|
| ENSG00000231185 | -4.631531 | -1.658813 | 0.285714 | 1 AC005592.2     | --     |
| ENSG00000231407 | -4.631531 | -1.658813 | 0.285714 | 1 RP11-576I22.2  | --     |
| ENSG00000231842 | -4.631531 | -1.658813 | 0.285714 | 1 RP11-527F13.1  | --     |
| ENSG00000231871 | -4.631531 | -1.658813 | 0.285714 | 1 IPO9-AS1       | --     |
| ENSG00000232043 | -4.631531 | -1.658813 | 0.285714 | 1 RP4-530I15.9   | --     |
| ENSG00000232460 | -4.631531 | -1.658813 | 0.285714 | 1 BMPR1APS2      | K04673 |
| ENSG00000233509 | -4.631531 | -1.658813 | 0.285714 | 1 ZNF197-AS1     | --     |
| ENSG00000233514 | -4.631531 | -1.658813 | 0.285714 | 1 RP11-570P14.1  | K11087 |
| ENSG00000233611 | -4.631531 | -1.658813 | 0.285714 | 1 AC079135.1     | --     |
| ENSG00000234175 | -4.631531 | -1.658813 | 0.285714 | 1 RP11-730A19.9  | --     |
| ENSG00000235437 | -4.631531 | -1.658813 | 0.285714 | 1 RP11-357C3.3   | --     |
| ENSG00000236591 | -4.631531 | -1.658813 | 0.285714 | 1 RP11-162J8.3   | --     |
| ENSG00000237683 | -4.631531 | -1.658813 | 0.285714 | 1 AL627309.1     | --     |
| ENSG00000238350 | -4.631531 | -1.658813 | 0.285714 | 1 snoU13         | --     |
| ENSG00000240106 | -4.631531 | -1.658813 | 0.285714 | 1 RN7SL146P      | --     |
| ENSG00000241104 | -4.631531 | -1.658813 | 0.285714 | 1 CEACAMP10      | K06500 |
| ENSG00000241218 | -4.631531 | -1.658813 | 0.285714 | 1 RP11-446H18.1  | K01647 |
| ENSG00000241769 | -4.631531 | -1.658813 | 0.285714 | 1 LINC00893      | --     |
| ENSG00000245573 | -4.631531 | -1.658813 | 0.285714 | 1 BDNF-AS        | --     |
| ENSG00000245888 | -4.631531 | -1.658813 | 0.285714 | 1 CTD-3203P2.2   | --     |
| ENSG00000248375 | -4.631531 | -1.658813 | 0.285714 | 1 RP11-177B4.1   | K06641 |
| ENSG00000249249 | -4.631531 | -1.658813 | 0.285714 | 1 AC010226.4     | --     |
| ENSG00000249357 | -4.631531 | -1.658813 | 0.285714 | 1 RP11-432M8.8   | K03135 |
| ENSG00000253084 | -4.631531 | -1.658813 | 0.285714 | 1 RNU6-840P      | --     |
| ENSG00000253328 | -4.631531 | -1.658813 | 0.285714 | 1 SUMO2P19       | K12160 |
| ENSG00000254039 | -4.631531 | -1.658813 | 0.285714 | 1 RP11-304F15.6  | --     |
| ENSG00000254290 | -4.631531 | -1.658813 | 0.285714 | 1 RP11-150O12.3  | --     |
| ENSG00000255046 | -4.631531 | -1.658813 | 0.285714 | 1 RP11-297N6.4   | K04613 |
| ENSG00000255158 | -4.631531 | -1.658813 | 0.285714 | 1 RP11-754B17.1  | --     |
| ENSG00000255449 | -4.631531 | -1.658813 | 0.285714 | 1 RP11-91P24.6   | --     |
| ENSG00000256316 | -4.631531 | -1.658813 | 0.285714 | 1 HIST1H3F       | K11253 |
| ENSG00000256980 | -4.631531 | -1.658813 | 0.285714 | 1 KHDC1L         | --     |
| ENSG00000257818 | -4.631531 | -1.658813 | 0.285714 | 1 RP11-1143G9.2  | K00731 |
| ENSG00000258414 | -4.631531 | -1.658813 | 0.285714 | 1 RP11-356O9.1   | --     |
| ENSG00000258572 | -4.631531 | -1.658813 | 0.285714 | 1 RP11-1070N10.3 | --     |
| ENSG00000258658 | -4.631531 | -1.658813 | 0.285714 | 1 RP11-517O13.3  | --     |
| ENSG00000259327 | -4.631531 | -1.658813 | 0.285714 | 1 CTD-2184D3.6   | --     |
| ENSG00000260118 | -4.631531 | -1.658813 | 0.285714 | 1 RP6-201G10.2   | --     |
| ENSG00000260171 | -4.631531 | -1.658813 | 0.285714 | 1 RP11-95H11.1   | --     |
| ENSG00000260396 | -4.631531 | -1.658813 | 0.285714 | 1 AC012065.7     | --     |
| ENSG00000260583 | -4.631531 | -1.658813 | 0.285714 | 1 LINC00515      | --     |
| ENSG00000260765 | -4.631531 | -1.658813 | 0.285714 | 1 CES1P2         | K01044 |
| ENSG00000260949 | -4.631531 | -1.658813 | 0.285714 | 1 KB-1836B5.1    | --     |
| ENSG00000261215 | -4.631531 | -1.658813 | 0.285714 | 1 RP11-195F19.30 | --     |
| ENSG00000261600 | -4.631531 | -1.658813 | 0.285714 | 1 RP11-575H3.1   | --     |
| ENSG00000262298 | -4.631531 | -1.658813 | 0.285714 | 1 RP5-1107A17.3  | --     |
| ENSG00000262766 | -4.631531 | -1.658813 | 0.285714 | 1 RP11-196G11.4  | --     |
| ENSG00000262777 | -4.631531 | -1.658813 | 0.285714 | 1 RP11-818O24.3  | --     |
| ENSG00000263321 | -4.631531 | -1.658813 | 0.285714 | 1 RP11-388C12.5  | --     |
| ENSG00000263627 | -4.631531 | -1.658813 | 0.285714 | 1 RP11-692N5.1   | --     |
| ENSG00000264175 | -4.631531 | -1.658813 | 0.285714 | 1 MIR3189        | --     |
| ENSG00000264448 | -4.631531 | -1.658813 | 0.285714 | 1 MIR378D2       | --     |
| ENSG00000265800 | -4.631531 | -1.658813 | 0.285714 | 1 RP11-649A18.5  | --     |
| ENSG00000266283 | -4.631531 | -1.658813 | 0.285714 | 1 RP11-627G18.1  | --     |
| ENSG00000267637 | -4.631531 | -1.658813 | 0.285714 | 1 RP11-619I22.1  | --     |
| ENSG00000268069 | -4.631531 | -1.658813 | 0.285714 | 1 AC004466.1     | K11408 |
| ENSG00000269019 | -4.631531 | -1.658813 | 0.285714 | 1 AC005932.1     | --     |
| ENSG00000269403 | -4.631531 | -1.658813 | 0.285714 | 1 CTD-2616J11.11 | K03521 |

|                 |           |           |          |                  |        |
|-----------------|-----------|-----------|----------|------------------|--------|
| ENSG00000269892 | -4.631531 | -1.658813 | 0.285714 | 1 RP4-761J14.10  | -      |
| ENSG00000270069 | -4.631531 | -1.658813 | 0.285714 | 1 RP6-99M1.2     | -      |
| ENSG00000270617 | -4.631531 | -1.658813 | 0.285714 | 1 URGCP-MRPS24   | K17403 |
| ENSG00000271161 | -4.631531 | -1.658813 | 0.285714 | 1 RP11-708J19.2  | -      |
| ENSG00000272201 | -4.631531 | -1.658813 | 0.285714 | 1 U47924.30      | -      |
| ENSG00000272360 | -4.631531 | -1.658813 | 0.285714 | 1 RP11-359I18.5  | -      |
| ENSG00000272457 | -4.631531 | -1.658813 | 0.285714 | 1 RP11-1070A24.2 | -      |
| ENSG00000272854 | -4.631531 | -1.658813 | 0.285714 | 1 RP4-593H12.1   | -      |
| ENSG00000272941 | -4.631531 | -1.658813 | 0.285714 | 1 RP11-134L10.1  | -      |
| ENSG00000273097 | -4.631531 | -1.658813 | 0.285714 | 1 RP11-219C20.3  | -      |
| ENSG00000273264 | -4.631531 | -1.658813 | 0.285714 | 1 RP11-131L23.2  | -      |
| ENSG00000273384 | -4.631531 | -1.658813 | 0.285714 | 1 RP5-1098D14.1  | -      |
| ENSG00000273389 | -4.631531 | -1.658813 | 0.285714 | 1 RP13-514E23.2  | -      |
| ENSG00000273493 | -4.631531 | -1.658813 | 0.285714 | 1 RP11-80H18.4   | -      |
| ENSG00000175115 | 0.704478  | 6.664569  | 0.286001 | 1 PACS1          | -      |
| ENSG00000144048 | -0.714501 | 5.087422  | 0.286049 | 1 DUSP11         | K14165 |
| ENSG00000105427 | 0.786579  | 1.868122  | 0.286292 | 1 CNFN           | -      |
| ENSG00000256982 | 0.786579  | 1.868122  | 0.286292 | 1 CTD-2555A7.2   | -      |
| ENSG00000169242 | 0.70297   | 6.845697  | 0.286757 | 1 EFNA1          | K05462 |
| ENSG00000213865 | 0.754198  | 3.178925  | 0.286807 | 1 C8orf44        | K12581 |
| ENSG00000196696 | -0.779767 | 2.496422  | 0.28681  | 1 PDXDC2P        | -      |
| ENSG00000173950 | -0.721436 | 4.523365  | 0.287169 | 1 XXYLT1         | -      |
| ENSG00000162413 | 0.709913  | 5.517023  | 0.28733  | 1 KLHL21         | K10458 |
| ENSG00000255198 | 0.871451  | 1.285769  | 0.287651 | 1 SNHG9          | -      |
| ENSG00000162804 | 0.725671  | 3.958529  | 0.28766  | 1 SNED1          | -      |
| ENSG00000173727 | 0.741735  | 2.965498  | 0.287895 | 1 AP000769.1     | K02983 |
| ENSG00000148444 | -0.72779  | 4.181621  | 0.287928 | 1 COMMD3         | K11459 |
| ENSG00000152778 | -0.762265 | 2.828262  | 0.288039 | 1 IFIT5          | K14217 |
| ENSG00000145908 | -0.744738 | 3.605597  | 0.288089 | 1 ZNF300         | K09228 |
| ENSG00000153558 | 0.746881  | 3.068334  | 0.288796 | 1 FBXL2          | K10268 |
| ENSG00000143353 | -0.730848 | 3.912023  | 0.288852 | 1 LYPLAL1        | K06999 |
| ENSG00000129028 | -0.776704 | 2.935733  | 0.289047 | 1 THAP10         | -      |
| ENSG00000113504 | 0.706207  | 5.141701  | 0.289412 | 1 SLC12A7        | K13627 |
| ENSG00000089847 | 0.90273   | 1.033447  | 0.290499 | 1 ANKRD24        | -      |
| ENSG00000229932 | 0.90273   | 1.033447  | 0.290499 | 1 YWHAZP3        | K16197 |
| ENSG00000270223 | 0.90273   | 1.033447  | 0.290499 | 1 RP13-36G14.4   | -      |
| ENSG00000119725 | -0.889084 | 1.131318  | 0.290499 | 1 ZNF410         | K13949 |
| ENSG00000230615 | -0.889084 | 1.131318  | 0.290499 | 1 RP5-1198O20.4  | -      |
| ENSG00000135406 | 0.841766  | 1.058421  | 0.290499 | 1 PRPH           | K07607 |
| ENSG00000223891 | 0.813496  | 1.562887  | 0.290856 | 1 OSER1-AS1      | -      |
| ENSG00000131725 | 0.699989  | 5.623477  | 0.29139  | 1 WDR44          | -      |
| ENSG00000188690 | -0.705702 | 5.046975  | 0.291476 | 1 UROS           | K01719 |
| ENSG00000129657 | 0.696367  | 6.361631  | 0.291832 | 1 SEC14L1        | -      |
| ENSG00000169189 | -0.711574 | 4.778843  | 0.291972 | 1 NSMCE1         | -      |
| ENSG00000120699 | -0.698006 | 6.403749  | 0.292084 | 1 EXOSC8         | K12586 |
| ENSG00000145506 | 0.718145  | 4.134115  | 0.292292 | 1 NKD2           | K03213 |
| ENSG00000165929 | 0.732368  | 3.140097  | 0.292459 | 1 TC2N           | K17287 |
| ENSG00000163964 | -0.705816 | 5.025655  | 0.292611 | 1 PIGX           | K07541 |
| ENSG00000188994 | 0.707174  | 4.908222  | 0.292844 | 1 ZNF292         | -      |
| ENSG00000163104 | -0.704576 | 5.135466  | 0.29286  | 1 SMARCAD1       | K14439 |
| ENSG00000142046 | 0.813991  | 1.818271  | 0.292915 | 1 TMEM91         | -      |
| ENSG00000238084 | -0.806598 | 1.871983  | 0.292915 | 1 RP3-469D22.1   | K00237 |
| ENSG00000243749 | -0.806598 | 1.871983  | 0.292915 | 1 ZMYM6NB        | -      |
| ENSG00000268460 | -0.787935 | 2.366238  | 0.293234 | 1 AC006262.6     | -      |
| ENSG00000118513 | -0.904736 | 1.458613  | 0.293828 | 1 MYB            | K09420 |
| ENSG00000143614 | 0.883172  | 1.387656  | 0.293828 | 1 GATAD2B        | -      |
| ENSG00000152763 | 0.883172  | 1.387656  | 0.293828 | 1 WDR78          | -      |
| ENSG00000188277 | 0.883172  | 1.387656  | 0.293828 | 1 C15orf62       | -      |

|                 |           |          |          |                 |        |
|-----------------|-----------|----------|----------|-----------------|--------|
| ENSG00000186615 | 0.836125  | 1.406868 | 0.293828 | 1 KTN1-AS1      | -      |
| ENSG00000215067 | 0.836125  | 1.406868 | 0.293828 | 1 AC027763.2    | K12417 |
| ENSG00000249199 | 0.836125  | 1.406868 | 0.293828 | 1 CTD-2139B15.5 | -      |
| ENSG00000146426 | -0.954791 | 0.91474  | 0.293949 | 1 TIAM2         | K16847 |
| ENSG00000172062 | -0.954791 | 0.91474  | 0.293949 | 1 SMN1          | K13129 |
| ENSG00000203739 | 0.954703  | 0.803404 | 0.293949 | 1 RP11-296O14.3 | -      |
| ENSG00000225573 | 0.954703  | 0.803404 | 0.293949 | 1 RPL35P5       | K02918 |
| ENSG00000229729 | 0.954703  | 0.803404 | 0.293949 | 1 RP11-159G9.5  | -      |
| ENSG00000236992 | 0.954703  | 0.803404 | 0.293949 | 1 RPL12L3       | K02870 |
| ENSG00000164953 | -0.714624 | 4.186325 | 0.294034 | 1 TMEM67        | K19348 |
| ENSG00000163283 | 0.691308  | 7.245061 | 0.294153 | 1 ALPP          | K01077 |
| ENSG00000181481 | -0.716087 | 4.066115 | 0.294212 | 1 RNF135        | K16272 |
| ENSG00000064651 | -0.714718 | 4.286117 | 0.295258 | 1 SLC12A2       | K10951 |
| ENSG00000203875 | -0.70106  | 4.871353 | 0.295425 | 1 SNHG5         | -      |
| ENSG00000250337 | -0.70714  | 4.504139 | 0.295507 | 1 LINC01021     | -      |
| ENSG00000118503 | -0.703753 | 4.799376 | 0.29561  | 1 TNFAIP3       | K11859 |
| ENSG00000131069 | -0.693863 | 5.689487 | 0.29586  | 1 ACSS2         | K01895 |
| ENSG00000196449 | -0.705399 | 4.808774 | 0.296154 | 1 YRDC          | -      |
| ENSG00000164850 | 0.720801  | 3.688934 | 0.296425 | 1 GPER1         | K04246 |
| ENSG00000167703 | 0.694835  | 5.137977 | 0.296474 | 1 SLC43A2       | K08229 |
| ENSG00000165655 | -0.72195  | 3.774767 | 0.296639 | 1 ZNF503        | -      |
| ENSG00000234362 | 0.79267   | 1.903188 | 0.296983 | 1 AC104654.2    | -      |
| ENSG00000161642 | 0.697844  | 4.921374 | 0.297043 | 1 ZNF385A       | -      |
| ENSG00000182871 | 0.752207  | 2.660073 | 0.297256 | 1 COL18A1       | K06823 |
| ENSG00000106610 | -0.715534 | 3.993797 | 0.297339 | 1 STAG3L4       | K13055 |
| ENSG00000183474 | -0.9261   | 1.269403 | 0.297457 | 1 GTF2H2C       | K03142 |
| ENSG00000183840 | -0.9261   | 1.269403 | 0.297457 | 1 GPR39         | K08412 |
| ENSG00000253598 | 0.857819  | 1.176412 | 0.297457 | 1 SLC10A5       | K14343 |
| ENSG00000184470 | -0.690959 | 6.127452 | 0.297731 | 1 TXNRD2        | K00384 |
| ENSG00000115841 | -1.003325 | 0.627399 | 0.298081 | 1 RMDN2         | K12756 |
| ENSG00000265962 | -1.003325 | 0.627399 | 0.298081 | 1 RP11-674N23.1 | -      |
| ENSG00000135338 | -0.952996 | 0.594511 | 0.298081 | 1 LCA5          | -      |
| ENSG00000186007 | -0.952996 | 0.594511 | 0.298081 | 1 LEMD1         | -      |
| ENSG00000261690 | -0.952996 | 0.594511 | 0.298081 | 1 AC009133.12   | -      |
| ENSG00000180834 | 0.931663  | 0.478331 | 0.298081 | 1 MAP6D1        | -      |
| ENSG00000198134 | 0.931663  | 0.478331 | 0.298081 | 1 RP11-267J23.4 | K13784 |
| ENSG00000263412 | 0.931663  | 0.478331 | 0.298081 | 1 RP5-890E16.2  | -      |
| ENSG00000107262 | 0.683918  | 8.62852  | 0.298114 | 1 BAG1          | K09555 |
| ENSG00000167550 | -0.714054 | 3.699164 | 0.298522 | 1 RHEBL1        | K07849 |
| ENSG00000122035 | 0.714533  | 3.906841 | 0.298984 | 1 RASL11A       | K07852 |
| ENSG00000153832 | -0.815924 | 1.578257 | 0.299162 | 1 FBXO36        | K10312 |
| ENSG00000203724 | -0.815924 | 1.578257 | 0.299162 | 1 C1orf53       | -      |
| ENSG00000163386 | 0.754586  | 2.566985 | 0.299211 | 1 NBPF10        | -      |
| ENSG00000172183 | -0.708223 | 4.169351 | 0.299393 | 1 ISG20         | K12579 |
| ENSG00000140459 | -0.712595 | 3.661583 | 0.299542 | 1 CYP11A1       | K00498 |
| ENSG00000127663 | 0.691641  | 5.093585 | 0.299594 | 1 KDM4B         | K06709 |
| ENSG00000272645 | -0.839744 | 1.824277 | 0.300098 | 1 RP11-504P24.8 | -      |
| ENSG00000102878 | -0.724181 | 3.162183 | 0.300153 | 1 HSF4          | K09417 |
| ENSG00000121988 | -0.724181 | 3.162183 | 0.300153 | 1 ZRANB3        | K09488 |
| ENSG00000153904 | -0.685009 | 6.401203 | 0.301059 | 1 DDAH1         | K01482 |
| ENSG00000171346 | 0.750111  | 2.747547 | 0.301579 | 1 KRT15         | K07604 |
| ENSG00000095637 | 0.732868  | 2.754552 | 0.301579 | 1 SORBS1        | K06086 |
| ENSG00000253276 | -0.706606 | 3.988202 | 0.301752 | 1 CCDC71L       | -      |
| ENSG00000162971 | -0.714688 | 3.644209 | 0.301763 | 1 TYW5          | K18066 |
| ENSG00000198440 | -0.95542  | 1.051035 | 0.301975 | 1 ZNF583        | K09228 |
| ENSG00000221995 | 0.896275  | 0.969574 | 0.301975 | 1 TIAF1         | K10362 |
| ENSG00000075651 | 0.692845  | 4.845398 | 0.302166 | 1 PLD1          | K01115 |
| ENSG00000105329 | 0.680592  | 6.523364 | 0.302175 | 1 TGFB1         | K13375 |



|                 |           |           |          |                 |        |
|-----------------|-----------|-----------|----------|-----------------|--------|
| ENSG00000188167 | 1.163012  | 0.079269  | 0.302645 | 1 TMPPE         | -      |
| ENSG00000232630 | 1.163012  | 0.079269  | 0.302645 | 1 PRPS1P2       | K00948 |
| ENSG00000236861 | 1.163012  | 0.079269  | 0.302645 | 1 AC006378.2    | -      |
| ENSG00000269979 | 1.163012  | 0.079269  | 0.302645 | 1 RP11-498E2.7  | -      |
| ENSG00000270133 | 1.163012  | 0.079269  | 0.302645 | 1 CTC-303L1.2   | -      |
| ENSG00000125775 | 1.027679  | 0.129644  | 0.302645 | 1 SDCBP2        | -      |
| ENSG00000180015 | 1.027679  | 0.129644  | 0.302645 | 1 RP11-756P10.3 | K02835 |
| ENSG00000213073 | 1.027679  | 0.129644  | 0.302645 | 1 RP11-288H12.3 | K17610 |
| ENSG00000227533 | 1.027679  | 0.129644  | 0.302645 | 1 SLC2A1-AS1    | -      |
| ENSG00000234281 | 1.027679  | 0.129644  | 0.302645 | 1 AC007970.1    | -      |
| ENSG00000234648 | 1.027679  | 0.129644  | 0.302645 | 1 AL162151.3    | K02925 |
| ENSG00000240891 | 1.027679  | 0.129644  | 0.302645 | 1 PLCXD2        | -      |
| ENSG00000197971 | -0.711938 | 3.900139  | 0.3027   | 1 MBP           | K17269 |
| ENSG00000171246 | 0.67668   | 8.124754  | 0.303524 | 1 NPTX1         | -      |
| ENSG00000247134 | -0.847861 | 1.680097  | 0.303817 | 1 RP11-11N9.4   | -      |
| ENSG00000182885 | -0.82484  | 1.665124  | 0.303817 | 1 GPR97         | K08452 |
| ENSG00000076928 | 0.820224  | 1.605921  | 0.303817 | 1 ARHGEF1       | K12330 |
| ENSG00000237172 | 0.780877  | 1.622236  | 0.303817 | 1 B3GNT9        | K18705 |
| ENSG00000269430 | 0.756824  | 2.059312  | 0.303985 | 1 LRRC3DN       | -      |
| ENSG00000197757 | 0.713666  | 3.464674  | 0.304259 | 1 HOXC6         | K09306 |
| ENSG00000005020 | -0.691839 | 4.783541  | 0.304259 | 1 SKAP2         | -      |
| ENSG00000226479 | -0.696668 | 4.44506   | 0.304322 | 1 TMEM185B      | -      |
| ENSG0000023572  | -0.693409 | 4.44303   | 0.304322 | 1 GLRX2         | K03676 |
| ENSG00000080608 | -0.678421 | 6.711418  | 0.304436 | 1 KIAA0020      | K14844 |
| ENSG00000185986 | -0.725885 | 3.337181  | 0.304519 | 1 SDHAP3        | K00234 |
| ENSG00000092978 | -0.709255 | 3.834131  | 0.304729 | 1 GPATCH2       | K17569 |
| ENSG00000163584 | -0.675382 | 7.602045  | 0.305117 | 1 RPL22L1       | K02891 |
| ENSG00000079435 | 1.238158  | -0.493694 | 0.305221 | 1 LIPE          | K07188 |
| ENSG00000104327 | 1.238158  | -0.493694 | 0.305221 | 1 CALB1         | K14757 |
| ENSG00000138316 | 1.238158  | -0.493694 | 0.305221 | 1 ADAMTS14      | K08628 |
| ENSG00000147394 | 1.238158  | -0.493694 | 0.305221 | 1 ZNF185        | -      |
| ENSG00000183682 | 1.238158  | -0.493694 | 0.305221 | 1 BMP8A         | K16622 |
| ENSG00000197245 | 1.238158  | -0.493694 | 0.305221 | 1 FAM110D       | -      |
| ENSG00000205086 | 1.238158  | -0.493694 | 0.305221 | 1 C2orf91       | -      |
| ENSG00000206178 | 1.238158  | -0.493694 | 0.305221 | 1 HBZP1         | K13826 |
| ENSG00000219626 | 1.238158  | -0.493694 | 0.305221 | 1 FAM228B       | K10133 |
| ENSG00000221916 | 1.238158  | -0.493694 | 0.305221 | 1 C19orf73      | -      |
| ENSG00000231313 | 1.238158  | -0.493694 | 0.305221 | 1 CLIC1P1       | K05021 |
| ENSG00000243587 | 1.238158  | -0.493694 | 0.305221 | 1 C6orf183      | -      |
| ENSG00000248734 | 1.238158  | -0.493694 | 0.305221 | 1 CTD-2260A17.1 | -      |
| ENSG00000251593 | 1.238158  | -0.493694 | 0.305221 | 1 MSNP1         | K05763 |
| ENSG00000260233 | 1.238158  | -0.493694 | 0.305221 | 1 SSSCA1-AS1    | -      |
| ENSG00000267500 | 1.238158  | -0.493694 | 0.305221 | 1 CTD-2006C1.6  | K09228 |
| ENSG00000272658 | 1.238158  | -0.493694 | 0.305221 | 1 LTB4R2        | K04297 |
| ENSG00000272677 | 1.238158  | -0.493694 | 0.305221 | 1 RP11-127B20.3 | -      |
| ENSG00000257923 | 0.708641  | 3.492343  | 0.305446 | 1 CUX1          | K09313 |
| ENSG00000164442 | -0.673957 | 7.978605  | 0.305733 | 1 CITED2        | -      |
| ENSG00000105829 | -0.681039 | 5.859534  | 0.30577  | 1 BET1          | K08504 |
| ENSG00000198406 | 0.698788  | 4.01428   | 0.306074 | 1 BZW1P2        | -      |
| ENSG00000168301 | -0.713829 | 3.546401  | 0.306592 | 1 KCTD6         | -      |
| ENSG00000099957 | -0.759692 | 2.348112  | 0.306624 | 1 P2RX6         | K05221 |
| ENSG00000100234 | 0.674658  | 6.671819  | 0.306789 | 1 TIMP3         | K16866 |
| ENSG00000106031 | 0.723724  | 2.879192  | 0.307205 | 1 HOXA13        | K09298 |
| ENSG00000085719 | -0.674319 | 6.771495  | 0.307216 | 1 CPNE3         | -      |
| ENSG00000164136 | -0.708978 | 3.640623  | 0.307436 | 1 IL15          | K05433 |
| ENSG00000168389 | -0.803187 | 1.998852  | 0.307454 | 1 MFSD2A        | -      |
| ENSG00000149313 | -0.677049 | 5.915666  | 0.30751  | 1 AASDHPPT      | K06133 |
| ENSG00000159263 | -0.722798 | 3.23844   | 0.307693 | 1 SIM2          | K09100 |

|                 |           |          |          |                 |        |
|-----------------|-----------|----------|----------|-----------------|--------|
| ENSG00000234494 | -0.99817  | 0.792786 | 0.307713 | 1 AC003665.1    | -      |
| ENSG00000119636 | -0.954005 | 0.763759 | 0.307713 | 1 CCDC176       | -      |
| ENSG00000227285 | -0.954005 | 0.763759 | 0.307713 | 1 RP3-327A19.5  | -      |
| ENSG00000244479 | -0.954005 | 0.763759 | 0.307713 | 1 OR2A1-AS1     | -      |
| ENSG00000253796 | -0.954005 | 0.763759 | 0.307713 | 1 RP11-1084E5.1 | -      |
| ENSG00000269386 | -0.954005 | 0.763759 | 0.307713 | 1 RAB11B-AS1    | -      |
| ENSG00000168795 | 0.680658  | 5.414523 | 0.307957 | 1 ZBTB5         | K10492 |
| ENSG00000090530 | -0.673853 | 6.650069 | 0.307965 | 1 LEPREL1       | -      |
| ENSG00000223573 | 0.67541   | 5.953076 | 0.308033 | 1 TINCR         | -      |
| ENSG00000074527 | -0.678581 | 5.885657 | 0.308124 | 1 NTN4          | K06845 |
| ENSG00000231345 | -0.858067 | 1.51964  | 0.308333 | 1 RP11-564C4.6  | -      |
| ENSG00000068323 | 0.850133  | 1.118579 | 0.308509 | 1 TFE3          | K09105 |
| ENSG00000140876 | 0.850133  | 1.118579 | 0.308509 | 1 NUDT7         | K17879 |
| ENSG00000256092 | 0.850133  | 1.118579 | 0.308509 | 1 hsa-mir-8072  | -      |
| ENSG00000111801 | -0.69253  | 4.198109 | 0.308709 | 1 BTN3A3        | K06712 |
| ENSG00000169184 | 0.674951  | 6.014925 | 0.308865 | 1 MN1           | -      |
| ENSG00000103485 | 0.737795  | 2.370053 | 0.309113 | 1 QPRT          | K00767 |
| ENSG00000076826 | 0.681823  | 4.798796 | 0.309319 | 1 CAMSAP3       | K17493 |
| ENSG00000135537 | -0.747583 | 2.852405 | 0.309392 | 1 LACE1         | K18798 |
| ENSG00000165861 | 0.713412  | 3.357353 | 0.309876 | 1 ZFYVE1        | K17603 |
| ENSG00000185033 | 0.670787  | 6.516141 | 0.309998 | 1 SEMA4B        | K06521 |
| ENSG00000173064 | 0.681073  | 4.85002  | 0.310045 | 1 HECTD4        | K17849 |
| ENSG00000197182 | 0.696549  | 3.534847 | 0.310185 | 1 FLJ27365      | -      |
| ENSG00000138640 | 0.688807  | 4.497658 | 0.310477 | 1 FAM13A        | -      |
| ENSG00000130433 | 0.779649  | 2.015812 | 0.310597 | 1 CACNG6        | K04871 |
| ENSG00000243302 | 0.779649  | 2.015812 | 0.310597 | 1 RP11-274B21.2 | -      |
| ENSG00000154328 | -0.714529 | 3.485158 | 0.310599 | 1 NEIL2         | K10568 |
| ENSG00000134755 | -0.691474 | 4.247306 | 0.310734 | 1 DSC2          | K07601 |
| ENSG00000124762 | 0.667551  | 7.341691 | 0.310803 | 1 CDKN1A        | K06625 |
| ENSG00000108813 | 0.682957  | 4.803524 | 0.310832 | 1 DLX4          | K09314 |
| ENSG00000171223 | -0.665467 | 9.057819 | 0.311113 | 1 JUNB          | K09028 |
| ENSG00000230513 | -0.741006 | 2.471631 | 0.311421 | 1 THAP7-AS1     | -      |
| ENSG00000260257 | 0.726239  | 2.428507 | 0.311421 | 1 RP5-1085F17.3 | -      |
| ENSG00000158825 | 0.667636  | 6.330183 | 0.311716 | 1 CDA           | K01489 |
| ENSG00000140443 | 0.666615  | 7.111031 | 0.311792 | 1 IGF1R         | K05087 |
| ENSG00000006015 | -0.673335 | 5.484057 | 0.312198 | 1 C19orf60      | -      |
| ENSG00000155850 | -0.677427 | 5.00803  | 0.31234  | 1 SLC26A2       | K14701 |
| ENSG00000085563 | -0.766745 | 2.30447  | 0.312343 | 1 ABCB1         | K05658 |
| ENSG00000184584 | -0.671969 | 5.141618 | 0.313028 | 1 TMEM173       | K12654 |
| ENSG00000060237 | 0.663087  | 8.466965 | 0.313038 | 1 WNK1          | K08867 |
| ENSG00000186603 | -0.673683 | 5.442428 | 0.313174 | 1 HPDL          | -      |
| ENSG00000163393 | -0.703245 | 3.637028 | 0.313213 | 1 SLC22A15      | K08211 |
| ENSG00000118600 | -0.684661 | 4.314758 | 0.313242 | 1 TMEM5         | K02927 |
| ENSG00000170634 | -0.758285 | 2.143977 | 0.313448 | 1 ACYP2         | K01512 |
| ENSG00000144395 | -0.711039 | 3.396372 | 0.313889 | 1 CCDC150       | -      |
| ENSG00000133805 | 0.864902  | 1.232091 | 0.313932 | 1 AMPD3         | K01490 |
| ENSG00000180998 | 0.864902  | 1.232091 | 0.313932 | 1 GPR137C       | -      |
| ENSG00000173599 | 0.663568  | 6.627086 | 0.314349 | 1 PC            | K01958 |
| ENSG00000196535 | 0.669013  | 5.80829  | 0.314389 | 1 MYO18A        | K10362 |
| ENSG00000184898 | -0.814315 | 1.942979 | 0.314789 | 1 RBM43         | -      |
| ENSG00000062370 | -0.795248 | 1.93065  | 0.314789 | 1 ZNF112        | K09228 |
| ENSG00000270101 | -0.722419 | 3.107248 | 0.314826 | 1 RP11-24B19.3  | -      |
| ENSG00000163607 | -0.680463 | 4.358038 | 0.314993 | 1 GTPBP8        | -      |
| ENSG00000141441 | -1.066359 | 0.476647 | 0.315121 | 1 GAREM         | -      |
| ENSG00000214776 | -1.066359 | 0.476647 | 0.315121 | 1 RP11-726G1.1  | K04850 |
| ENSG00000242689 | -1.066359 | 0.476647 | 0.315121 | 1 CNTF          | K05420 |
| ENSG00000160050 | 1.029385  | 0.343233 | 0.315121 | 1 CCDC28B       | -      |
| ENSG00000197558 | 1.029385  | 0.343233 | 0.315121 | 1 SSPO          | -      |

|                 |           |          |          |                  |        |
|-----------------|-----------|----------|----------|------------------|--------|
| ENSG00000205869 | 1.029385  | 0.343233 | 0.315121 | 1 KRTAP5-1       | -      |
| ENSG00000249709 | 1.029385  | 0.343233 | 0.315121 | 1 ZNF564         | K09228 |
| ENSG00000258457 | 1.029385  | 0.343233 | 0.315121 | 1 RP11-298I3.4   | -      |
| ENSG00000269982 | 1.029385  | 0.343233 | 0.315121 | 1 RP11-1020A11.2 | -      |
| ENSG00000234618 | -1.010147 | 0.439831 | 0.315121 | 1 RPSAP9         | K02998 |
| ENSG00000157613 | 0.923786  | 0.384744 | 0.315121 | 1 CREB3L1        | K09048 |
| ENSG00000218226 | 0.923786  | 0.384744 | 0.315121 | 1 TATDN2P2       | K03424 |
| ENSG00000271996 | 0.923786  | 0.384744 | 0.315121 | 1 RP11-337N6.1   | -      |
| ENSG00000139190 | 0.69035   | 3.597979 | 0.315679 | 1 VAMP1          | K08510 |
| ENSG00000083635 | -0.679755 | 4.476738 | 0.315883 | 1 NUFIP1         | -      |
| ENSG00000143633 | -0.678999 | 4.334368 | 0.315944 | 1 C1orf131       | K17776 |
| ENSG00000135111 | 0.661807  | 6.458256 | 0.316135 | 1 TBX3           | K10177 |
| ENSG00000137513 | -0.672057 | 4.821086 | 0.316437 | 1 NARS2          | K01893 |
| ENSG00000117148 | 0.78826   | 1.663565 | 0.316443 | 1 ACTL8          | -      |
| ENSG00000079691 | 0.663737  | 5.7604   | 0.316711 | 1 LRRC16A        | -      |
| ENSG00000182993 | -0.74686  | 2.431623 | 0.316864 | 1 C12orf60       | K17816 |
| ENSG00000103642 | -0.663084 | 6.035185 | 0.316988 | 1 LACTB          | K17382 |
| ENSG00000177707 | -0.690008 | 3.962995 | 0.317354 | 1 PVRL3          | K06592 |
| ENSG00000038002 | -0.699767 | 3.297146 | 0.317654 | 1 AGA            | K01444 |
| ENSG00000213096 | -0.757398 | 2.029787 | 0.317704 | 1 ZNF254         | K09228 |
| ENSG00000146109 | -0.877854 | 1.440974 | 0.318503 | 1 ABT1           | K14785 |
| ENSG00000225135 | -0.877854 | 1.440974 | 0.318503 | 1 RP11-361F15.2  | -      |
| ENSG00000100084 | -0.850461 | 1.42309  | 0.318503 | 1 HIRA           | K11293 |
| ENSG00000143951 | -0.850461 | 1.42309  | 0.318503 | 1 WDPCP          | -      |
| ENSG00000168906 | 0.654812  | 9.686542 | 0.318588 | 1 MAT2A          | K00789 |
| ENSG00000077157 | 0.691217  | 3.512013 | 0.319001 | 1 PPP1R12B       | K12329 |
| ENSG00000151414 | -0.657064 | 6.899761 | 0.319407 | 1 NEK7           | K08857 |
| ENSG00000129422 | 0.658422  | 6.293616 | 0.319416 | 1 MTUS1          | -      |
| ENSG00000243710 | -0.819035 | 1.810821 | 0.319771 | 1 WDR65          | K14823 |
| ENSG00000162390 | 0.801823  | 1.742931 | 0.319771 | 1 ACOT11         | K12417 |
| ENSG00000169857 | -0.675734 | 4.109486 | 0.320085 | 1 AVEN           | -      |
| ENSG00000148814 | -0.745361 | 2.338955 | 0.320611 | 1 LRRC27         | -      |
| ENSG00000224177 | 0.720672  | 2.507779 | 0.32075  | 1 LINC00570      | -      |
| ENSG00000197121 | -0.683584 | 3.767876 | 0.320771 | 1 PGAP1          | K05294 |
| ENSG00000183117 | -0.707975 | 2.724333 | 0.320819 | 1 CSMD1          | K17495 |
| ENSG00000153029 | -0.702275 | 3.274731 | 0.320849 | 1 MR1            | K17985 |
| ENSG00000205542 | -0.651271 | 10.57076 | 0.321051 | 1 TMSB4X         | K05764 |
| ENSG00000091428 | -0.854459 | 1.108769 | 0.321053 | 1 RAPGEF4        | K04351 |
| ENSG00000272438 | -0.854459 | 1.108769 | 0.321053 | 1 RP11-54O7.16   | -      |
| ENSG00000107829 | -0.676465 | 4.321279 | 0.321183 | 1 FBXW4          | K10262 |
| ENSG00000108840 | 0.657644  | 6.093651 | 0.321471 | 1 HDAC5          | K11406 |
| ENSG00000158769 | 0.661505  | 5.045182 | 0.322115 | 1 F11R           | K06089 |
| ENSG00000116741 | -0.664644 | 5.021527 | 0.322159 | 1 RGS2           | K18154 |
| ENSG00000177485 | 0.798711  | 1.472899 | 0.32241  | 1 ZBTB33         | K10507 |
| ENSG00000260361 | 0.798711  | 1.472899 | 0.32241  | 1 CTD-2313J17.5  | -      |
| ENSG00000272686 | -0.790907 | 1.562092 | 0.32241  | 1 RP11-390E23.6  | -      |
| ENSG00000140450 | 0.755858  | 1.490894 | 0.32241  | 1 ARRDC4         | -      |
| ENSG00000176533 | 0.755858  | 1.490894 | 0.32241  | 1 GNG7           | K04543 |
| ENSG00000175470 | -0.737386 | 2.593053 | 0.322495 | 1 PPP2R2D        | K04354 |
| ENSG00000116299 | 0.730371  | 2.552922 | 0.322495 | 1 KIAA1324       | -      |
| ENSG00000167658 | 0.649145  | 11.44443 | 0.322506 | 1 EEF2           | K03234 |
| ENSG00000071054 | -0.65241  | 6.688802 | 0.323269 | 1 MAP4K4         | K04407 |
| ENSG00000179455 | -0.705659 | 3.09668  | 0.323305 | 1 MKRN3          | K15687 |
| ENSG00000171608 | -0.6811   | 3.849065 | 0.323685 | 1 PIK3CD         | -      |
| ENSG00000164089 | 0.93853   | 0.566432 | 0.323905 | 1 ETNPPL         | K14286 |
| ENSG00000212670 | 0.93853   | 0.566432 | 0.323905 | 1 AL161915.1     | K12581 |
| ENSG00000242622 | 0.93853   | 0.566432 | 0.323905 | 1 RP11-18H7.1    | -      |
| ENSG00000155957 | -0.673356 | 3.876057 | 0.324363 | 1 TMBIM4         | K06890 |

|                 |           |           |          |                  |        |
|-----------------|-----------|-----------|----------|------------------|--------|
| ENSG00000162600 | -0.657886 | 5.158836  | 0.324378 | 1 OMA1           | -      |
| ENSG00000187017 | 0.661151  | 4.28878   | 0.324427 | 1 ESPN           | -      |
| ENSG00000167972 | 0.720954  | 2.404108  | 0.324489 | 1 ABCA3          | K05643 |
| ENSG00000073756 | -0.714575 | 2.45484   | 0.324489 | 1 PTGS2          | K11987 |
| ENSG00000152527 | -1.192547 | 0.068768  | 0.324544 | 1 PLEKHH2        | K10417 |
| ENSG00000168961 | -1.192547 | 0.068768  | 0.324544 | 1 LGALS9         | K10093 |
| ENSG00000204805 | -1.192547 | 0.068768  | 0.324544 | 1 FAM27E4        | -      |
| ENSG00000271738 | -1.192547 | 0.068768  | 0.324544 | 1 RP11-137H2.6   | -      |
| ENSG00000272009 | -1.192547 | 0.068768  | 0.324544 | 1 RP1-313I6.12   | -      |
| ENSG00000272755 | -1.192547 | 0.068768  | 0.324544 | 1 RP11-326G21.1  | -      |
| ENSG00000132274 | -1.115247 | 0.018705  | 0.324544 | 1 TRIM22         | K04257 |
| ENSG00000204536 | -1.115247 | 0.018705  | 0.324544 | 1 CCHCR1         | K16760 |
| ENSG00000224786 | -1.115247 | 0.018705  | 0.324544 | 1 CETN4P         | -      |
| ENSG00000235927 | -1.115247 | 0.018705  | 0.324544 | 1 NEXN-AS1       | -      |
| ENSG00000237773 | -1.115247 | 0.018705  | 0.324544 | 1 AC003075.4     | -      |
| ENSG00000267473 | -1.115247 | 0.018705  | 0.324544 | 1 AC005789.11    | -      |
| ENSG00000273226 | -1.115247 | 0.018705  | 0.324544 | 1 RP11-513M16.8  | -      |
| ENSG00000179284 | 1.025226  | -0.119387 | 0.324544 | 1 DAND5          | K12581 |
| ENSG00000197358 | 1.025226  | -0.119387 | 0.324544 | 1 BNIP3P1        | K15464 |
| ENSG00000224023 | 1.025226  | -0.119387 | 0.324544 | 1 RP11-383C5.4   | -      |
| ENSG00000228084 | 1.025226  | -0.119387 | 0.324544 | 1 RP5-884G6.2    | -      |
| ENSG00000243885 | 1.025226  | -0.119387 | 0.324544 | 1 RP11-278L15.2  | -      |
| ENSG00000251359 | 1.025226  | -0.119387 | 0.324544 | 1 WWC2-AS2       | -      |
| ENSG00000260273 | 1.025226  | -0.119387 | 0.324544 | 1 RP11-425D10.10 | -      |
| ENSG00000260597 | 1.025226  | -0.119387 | 0.324544 | 1 AC012531.25    | -      |
| ENSG00000178826 | -0.66384  | 4.824148  | 0.324691 | 1 TMEM139        | -      |
| ENSG00000135525 | 0.648994  | 6.968953  | 0.324888 | 1 MAP7           | K10433 |
| ENSG00000256073 | 0.727859  | 2.200136  | 0.324905 | 1 C21orf119      | -      |
| ENSG00000122481 | -0.676286 | 4.055248  | 0.325177 | 1 RWDD3          | -      |
| ENSG00000132326 | 0.730162  | 1.929209  | 0.325362 | 1 PER2           | K02633 |
| ENSG00000141965 | 0.730162  | 1.929209  | 0.325362 | 1 FEM1A          | -      |
| ENSG00000128346 | -0.723203 | 2.69793   | 0.325652 | 1 C22orf23       | -      |
| ENSG00000160145 | 0.693068  | 2.661877  | 0.325652 | 1 KALRN          | K15048 |
| ENSG00000268879 | 0.773045  | 1.579728  | 0.325787 | 1 IGFL1P1        | -      |
| ENSG00000227543 | -0.863593 | 1.228451  | 0.325858 | 1 SPAG5-AS1      | -      |
| ENSG00000179630 | -0.719811 | 2.899537  | 0.326475 | 1 LACC1          | K05810 |
| ENSG00000091127 | -0.651973 | 5.763833  | 0.326527 | 1 PUS7           | K06176 |
| ENSG00000163171 | -0.656387 | 4.851651  | 0.326842 | 1 CDC42EP3       | -      |
| ENSG00000215256 | -0.751974 | 2.295015  | 0.3269   | 1 DHRS4-AS1      | -      |
| ENSG00000117298 | 0.64543   | 7.377744  | 0.326948 | 1 ECE1           | K01415 |
| ENSG00000163346 | 0.649431  | 6.130514  | 0.32709  | 1 PBXIP1         | K13273 |
| ENSG00000174501 | 0.744097  | 1.995686  | 0.327732 | 1 ANKRD36C       | K17299 |
| ENSG00000247095 | 0.744097  | 1.995686  | 0.327732 | 1 MIR210HG       | -      |
| ENSG00000164715 | 0.656163  | 4.341815  | 0.327942 | 1 LMTK2          | K08898 |
| ENSG00000233016 | 0.646117  | 6.300296  | 0.327965 | 1 SNHG7          | -      |
| ENSG00000167220 | -0.672398 | 3.996103  | 0.328063 | 1 HDHD2          | -      |
| ENSG00000172530 | 0.652324  | 5.313086  | 0.328249 | 1 BANP           | -      |
| ENSG00000136720 | 0.651903  | 5.022382  | 0.328378 | 1 HS6ST1         | K02514 |
| ENSG00000243829 | 0.694481  | 2.74915   | 0.328433 | 1 CTB-33G10.1    | K02997 |
| ENSG00000066557 | -0.647011 | 6.174921  | 0.32884  | 1 LRRC40         | -      |
| ENSG00000166938 | -0.655083 | 4.691597  | 0.329271 | 1 DIS3L          | K18681 |
| ENSG00000228998 | -0.708793 | 2.613901  | 0.329322 | 1 RP11-697E2.7   | K10136 |
| ENSG00000116353 | -0.66846  | 3.873017  | 0.329491 | 1 MECR           | K07512 |
| ENSG00000198298 | -0.724798 | 2.122607  | 0.329874 | 1 ZNF485         | K09228 |
| ENSG00000144815 | -0.68675  | 3.19052   | 0.330151 | 1 NXPE3          | -      |
| ENSG00000166987 | 0.651914  | 4.768576  | 0.330308 | 1 MBD6           | -      |
| ENSG00000230074 | -0.872723 | 0.861179  | 0.330406 | 1 RP11-195F19.9  | -      |
| ENSG00000078124 | 0.872624  | 0.759786  | 0.330406 | 1 ACER3          | K04711 |

|                 |           |           |          |                 |        |
|-----------------|-----------|-----------|----------|-----------------|--------|
| ENSG00000225663 | 0.872624  | 0.759786  | 0.330406 | 1 FAM195B       | -      |
| ENSG00000260266 | 0.872624  | 0.759786  | 0.330406 | 1 CTD-2311M21.2 | K03767 |
| ENSG00000170442 | -0.733335 | 2.423006  | 0.330424 | 1 KRT86         | K07605 |
| ENSG00000108846 | -0.646944 | 5.614745  | 0.330513 | 1 ABCC3         | K05667 |
| ENSG00000170088 | -0.662249 | 4.004205  | 0.330701 | 1 TMEM192       | K12581 |
| ENSG00000184178 | -0.727691 | 2.663812  | 0.330723 | 1 SCFD2         | -      |
| ENSG00000169105 | -0.662939 | 4.391656  | 0.330834 | 1 CHST14        | K08105 |
| ENSG00000185000 | 0.687893  | 3.189984  | 0.331082 | 1 DGAT1         | K11155 |
| ENSG00000169126 | -0.766052 | 1.845856  | 0.331331 | 1 ARMC4         | -      |
| ENSG00000144468 | -0.697206 | 3.091364  | 0.332007 | 1 RHBDD1        | K09651 |
| ENSG00000081087 | -0.648075 | 5.12036   | 0.333176 | 1 OSTM1         | -      |
| ENSG00000224543 | -0.80576  | 1.485673  | 0.333198 | 1 SNRPGP15      | K11099 |
| ENSG00000260231 | 0.790565  | 1.425784  | 0.333198 | 1 JHDM1D-AS1    | -      |
| ENSG00000267530 | -0.704149 | 2.757072  | 0.333266 | 1 AC006273.5    | -      |
| ENSG00000131849 | 0.702841  | 2.210617  | 0.333593 | 1 ZNF132        | K09228 |
| ENSG00000078687 | 1.583971  | -0.771526 | 0.333681 | 1 TNRC6C        | K18412 |
| ENSG00000134940 | 1.583971  | -0.771526 | 0.333681 | 1 ACRV1         | -      |
| ENSG00000139626 | 1.583971  | -0.771526 | 0.333681 | 1 ITGB7         | K06590 |
| ENSG00000143479 | 1.583971  | -0.771526 | 0.333681 | 1 DYRK3         | K18669 |
| ENSG00000168026 | 1.583971  | -0.771526 | 0.333681 | 1 TTC21A        | -      |
| ENSG00000174945 | 1.583971  | -0.771526 | 0.333681 | 1 AMZ1          | K06974 |
| ENSG00000185958 | 1.583971  | -0.771526 | 0.333681 | 1 FAM186A       | -      |
| ENSG00000227288 | 1.583971  | -0.771526 | 0.333681 | 1 RP5-837I24.1  | -      |
| ENSG00000229348 | 1.583971  | -0.771526 | 0.333681 | 1 HYI-AS1       | -      |
| ENSG00000232811 | 1.583971  | -0.771526 | 0.333681 | 1 RP11-96K19.2  | -      |
| ENSG00000234383 | 1.583971  | -0.771526 | 0.333681 | 1 CTBP2P8       | K04496 |
| ENSG00000236537 | 1.583971  | -0.771526 | 0.333681 | 1 RP11-732M18.3 | -      |
| ENSG00000247728 | 1.583971  | -0.771526 | 0.333681 | 1 RP11-932O9.7  | -      |
| ENSG00000247809 | 1.583971  | -0.771526 | 0.333681 | 1 NR2F2-AS1     | -      |
| ENSG00000249700 | 1.583971  | -0.771526 | 0.333681 | 1 SRD5A3-AS1    | -      |
| ENSG00000253327 | 1.583971  | -0.771526 | 0.333681 | 1 RAD21-AS1     | -      |
| ENSG00000258824 | 1.583971  | -0.771526 | 0.333681 | 1 CTD-2555O16.2 | -      |
| ENSG00000265478 | 1.583971  | -0.771526 | 0.333681 | 1 CTD-2145A24.3 | -      |
| ENSG00000273113 | 1.583971  | -0.771526 | 0.333681 | 1 RP11-367H1.1  | -      |
| ENSG00000136514 | -1.384585 | -0.584421 | 0.333681 | 1 RTP4          | -      |
| ENSG00000146904 | -1.384585 | -0.584421 | 0.333681 | 1 EPHA1         | K05102 |
| ENSG00000151687 | -1.384585 | -0.584421 | 0.333681 | 1 ANKAR         | -      |
| ENSG00000162746 | -1.384585 | -0.584421 | 0.333681 | 1 FCRLB         | -      |
| ENSG00000167355 | -1.384585 | -0.584421 | 0.333681 | 1 AC104389.28   | -      |
| ENSG00000169129 | -1.384585 | -0.584421 | 0.333681 | 1 AFAP1L2       | -      |
| ENSG00000196550 | -1.384585 | -0.584421 | 0.333681 | 1 FAM72A        | -      |
| ENSG00000197332 | -1.384585 | -0.584421 | 0.333681 | 1 ZNF833P       | -      |
| ENSG00000212734 | -1.384585 | -0.584421 | 0.333681 | 1 C17orf100     | K15153 |
| ENSG00000213402 | -1.384585 | -0.584421 | 0.333681 | 1 PTPRCAP       | K13886 |
| ENSG00000224843 | -1.384585 | -0.584421 | 0.333681 | 1 LINC00240     | -      |
| ENSG00000231084 | -1.384585 | -0.584421 | 0.333681 | 1 CTA-253N17.1  | K02891 |
| ENSG00000235100 | -1.384585 | -0.584421 | 0.333681 | 1 RP11-80H5.9   | -      |
| ENSG00000238334 | -1.384585 | -0.584421 | 0.333681 | 1 snoU13        | -      |
| ENSG00000254602 | -1.384585 | -0.584421 | 0.333681 | 1 AP000662.4    | -      |
| ENSG00000258701 | -1.384585 | -0.584421 | 0.333681 | 1 LINC00638     | -      |
| ENSG00000259803 | -1.384585 | -0.584421 | 0.333681 | 1 SLC22A31      | -      |
| ENSG00000267648 | -1.384585 | -0.584421 | 0.333681 | 1 RP11-686D22.3 | -      |
| ENSG00000100156 | 1.273731  | -0.679119 | 0.333681 | 1 SLC16A8       | K08185 |
| ENSG00000129270 | 1.273731  | -0.679119 | 0.333681 | 1 MMP28         | K08006 |
| ENSG00000145087 | 1.273731  | -0.679119 | 0.333681 | 1 STXBP5L       | K08518 |
| ENSG00000145949 | 1.273731  | -0.679119 | 0.333681 | 1 MYLK4         | K00907 |
| ENSG00000160862 | 1.273731  | -0.679119 | 0.333681 | 1 AZGP1         | -      |
| ENSG00000172752 | 1.273731  | -0.679119 | 0.333681 | 1 COL6A5        | K06238 |

|                 |           |           |          |                  |        |
|-----------------|-----------|-----------|----------|------------------|--------|
| ENSG00000197380 | 1.273731  | -0.679119 | 0.333681 | 1 DACT3          | -      |
| ENSG00000229539 | 1.273731  | -0.679119 | 0.333681 | 1 RP11-119B16.2  | -      |
| ENSG00000233631 | 1.273731  | -0.679119 | 0.333681 | 1 RP11-457M11.2  | -      |
| ENSG00000235454 | 1.273731  | -0.679119 | 0.333681 | 1 RP11-678B3.2   | K16589 |
| ENSG00000238975 | 1.273731  | -0.679119 | 0.333681 | 1 snoU13         | -      |
| ENSG00000245975 | 1.273731  | -0.679119 | 0.333681 | 1 RP11-30K9.6    | -      |
| ENSG00000250602 | 1.273731  | -0.679119 | 0.333681 | 1 RP11-517I3.1   | -      |
| ENSG00000253667 | 1.273731  | -0.679119 | 0.333681 | 1 RP11-30L15.4   | -      |
| ENSG00000254812 | 1.273731  | -0.679119 | 0.333681 | 1 RP11-661A12.12 | -      |
| ENSG00000259182 | 1.273731  | -0.679119 | 0.333681 | 1 RP11-424I19.2  | -      |
| ENSG00000259424 | 1.273731  | -0.679119 | 0.333681 | 1 RP11-35O15.1   | -      |
| ENSG00000261349 | 1.273731  | -0.679119 | 0.333681 | 1 RP3-465N24.5   | -      |
| ENSG00000267231 | 1.273731  | -0.679119 | 0.333681 | 1 AC005786.5     | -      |
| ENSG00000268201 | 1.273731  | -0.679119 | 0.333681 | 1 CTD-3138B18.6  | -      |
| ENSG00000272800 | 1.273731  | -0.679119 | 0.333681 | 1 RP11-438L19.1  | -      |
| ENSG00000139800 | -0.643223 | 5.358567  | 0.334119 | 1 ZIC5           | K09226 |
| ENSG00000221955 | 0.652325  | 4.440308  | 0.334332 | 1 SLC12A8        | K14428 |
| ENSG00000236081 | -0.671559 | 3.349165  | 0.334427 | 1 AC074389.9     | -      |
| ENSG00000178605 | -0.649954 | 4.468679  | 0.334686 | 1 GTPBP6         | -      |
| ENSG00000171552 | -0.639088 | 5.911371  | 0.334736 | 1 BCL2L1         | K04570 |
| ENSG00000188878 | -0.694226 | 3.033567  | 0.335083 | 1 FBF1           | K16471 |
| ENSG00000138385 | -0.63484  | 7.39235   | 0.335115 | 1 SSB            | K11090 |
| ENSG00000140691 | -0.676633 | 3.374821  | 0.33518  | 1 ARMC5          | -      |
| ENSG00000114854 | -0.716264 | 2.320445  | 0.335217 | 1 TNNC1          | K05865 |
| ENSG00000068650 | 0.63599   | 6.392157  | 0.335237 | 1 ATP11A         | -      |
| ENSG00000157429 | -0.881738 | 1.002749  | 0.335401 | 1 ZNF19          | K09228 |
| ENSG00000267858 | -0.881738 | 1.002749  | 0.335401 | 1 AC016629.8     | -      |
| ENSG00000264920 | 0.822584  | 0.930337  | 0.335401 | 1 RP11-6N17.4    | -      |
| ENSG00000182141 | -0.739289 | 2.01821   | 0.335692 | 1 ZNF708         | K09228 |
| ENSG00000092200 | -1.149847 | 0.308096  | 0.335879 | 1 RPGRIP1        | K16512 |
| ENSG00000112902 | -1.086193 | 0.266327  | 0.335879 | 1 SEMA5A         | K06841 |
| ENSG00000213569 | -1.086193 | 0.266327  | 0.335879 | 1 RP13-383K5.4   | K15203 |
| ENSG00000214212 | -1.086193 | 0.266327  | 0.335879 | 1 C19orf38       | -      |
| ENSG00000249863 | -1.086193 | 0.266327  | 0.335879 | 1 RP11-177C12.1  | -      |
| ENSG00000114251 | -0.639094 | 5.985024  | 0.33591  | 1 WNT5A          | K00444 |
| ENSG00000236499 | 0.764721  | 1.535972  | 0.336064 | 1 LINC00896      | -      |
| ENSG00000141458 | 0.634418  | 6.691813  | 0.336309 | 1 NPC1           | K12385 |
| ENSG00000112081 | -0.631267 | 8.488794  | 0.336745 | 1 SRSF3          | K12892 |
| ENSG00000165006 | 0.633919  | 6.437513  | 0.336791 | 1 UBAP1          | -      |
| ENSG00000165898 | -0.653588 | 4.05503   | 0.336837 | 1 ISCA2          | -      |
| ENSG00000172954 | -0.659833 | 3.851851  | 0.33708  | 1 LCLAT1         | K13513 |
| ENSG00000139133 | -0.684524 | 2.939277  | 0.337519 | 1 ALG10          | K03850 |
| ENSG00000124107 | 0.631429  | 7.30861   | 0.337569 | 1 SLPI           | -      |
| ENSG00000172493 | 0.635001  | 6.228761  | 0.337783 | 1 AFF1           | K15184 |
| ENSG00000158234 | -0.643967 | 4.684761  | 0.338193 | 1 FAIM           | -      |
| ENSG00000104765 | 0.633982  | 6.163375  | 0.338449 | 1 BNIP3L         | K15465 |
| ENSG00000138293 | 0.670802  | 3.332221  | 0.338524 | 1 NCOA4          | K09289 |
| ENSG00000120686 | -0.633021 | 6.31336   | 0.33861  | 1 UFM1           | K12162 |
| ENSG00000137124 | -0.63638  | 5.728819  | 0.338778 | 1 ALDH1B1        | K00128 |
| ENSG00000160469 | 0.783274  | 1.082897  | 0.339352 | 1 BRSK1          | K08796 |
| ENSG00000243679 | -0.70976  | 2.494239  | 0.339362 | 1 RP11-274B21.3  | -      |
| ENSG00000099994 | -0.637797 | 5.146508  | 0.339421 | 1 SUSD2          | -      |
| ENSG00000174405 | -0.656486 | 3.957017  | 0.339434 | 1 LIG4           | K10777 |
| ENSG00000204634 | 0.633446  | 5.822306  | 0.339494 | 1 TBC1D8         | -      |
| ENSG00000234420 | -0.673942 | 3.049095  | 0.340145 | 1 ZNF37BP        | K09228 |
| ENSG00000092295 | -0.697016 | 2.8204    | 0.340336 | 1 TGM1           | K05619 |
| ENSG00000168071 | 0.656486  | 3.736734  | 0.34061  | 1 CCDC88B        | -      |
| ENSG00000111261 | -0.776705 | 1.783484  | 0.340697 | 1 MANSC1         | K09488 |

|                 |           |          |          |                 |        |
|-----------------|-----------|----------|----------|-----------------|--------|
| ENSG00000231500 | 0.75886   | 1.718941 | 0.340697 | 1 RPS18         | K02964 |
| ENSG00000178297 | 0.696207  | 2.18229  | 0.340729 | 1 TMPRSS9       | K09640 |
| ENSG00000095015 | -0.659563 | 3.646937 | 0.341333 | 1 MAP3K1        | K04416 |
| ENSG00000111669 | 0.709222  | 2.238412 | 0.342113 | 1 TPI1          | K01803 |
| ENSG00000218418 | 0.709222  | 2.238412 | 0.342113 | 1 RP11-296E7.1  | -      |
| ENSG00000175197 | 0.637494  | 4.56822  | 0.34232  | 1 DDIT3         | K04452 |
| ENSG00000059804 | 0.623385  | 8.719382 | 0.342535 | 1 SLC2A3        | K08142 |
| ENSG00000166153 | -0.811375 | 1.299814 | 0.342553 | 1 DEPDC4        | -      |
| ENSG00000142677 | 0.803714  | 1.198857 | 0.342553 | 1 IL22RA1       | K05138 |
| ENSG00000082512 | -0.649713 | 4.106711 | 0.342608 | 1 TRAF5         | K09849 |
| ENSG00000122497 | 0.683035  | 2.620053 | 0.342671 | 1 NBPF14        | -      |
| ENSG00000147642 | -0.659662 | 3.718532 | 0.342799 | 1 SYBU          | -      |
| ENSG00000072201 | -0.900847 | 0.560759 | 0.343208 | 1 LNX1          | K10692 |
| ENSG00000164251 | -0.900847 | 0.560759 | 0.343208 | 1 F2RL1         | K04234 |
| ENSG00000232807 | -0.900847 | 0.560759 | 0.343208 | 1 RP11-536K7.3  | -      |
| ENSG00000233868 | -0.900847 | 0.560759 | 0.343208 | 1 AC009302.2    | -      |
| ENSG00000259562 | -0.900847 | 0.560759 | 0.343208 | 1 RP11-762H8.2  | -      |
| ENSG00000271888 | -0.900847 | 0.560759 | 0.343208 | 1 RP11-560J1.2  | -      |
| ENSG00000196227 | -0.646556 | 3.890583 | 0.343281 | 1 FAM217B       | -      |
| ENSG00000103404 | -0.669872 | 2.989509 | 0.343714 | 1 USP31         | K11852 |
| ENSG00000109536 | -0.747455 | 1.963024 | 0.344281 | 1 FRG1          | K13122 |
| ENSG00000171798 | 0.722687  | 1.894821 | 0.344281 | 1 KNDC1         | -      |
| ENSG00000071243 | -0.672244 | 3.255932 | 0.34436  | 1 ING3          | K11319 |
| ENSG00000142798 | 0.62318   | 6.928256 | 0.344451 | 1 HSPG2         | K06255 |
| ENSG00000256745 | 0.685096  | 2.70978  | 0.344529 | 1 RP11-680H20.1 | K05756 |
| ENSG00000141574 | 0.624648  | 6.361428 | 0.345075 | 1 SECTM1        | -      |
| ENSG00000228106 | -0.644178 | 4.24232  | 0.345221 | 1 RP11-452F19.3 | -      |
| ENSG00000164976 | 0.634129  | 4.80213  | 0.345264 | 1 KIAA1161      | -      |
| ENSG00000171631 | 0.626509  | 5.275    | 0.345349 | 1 P2RY6         | K04272 |
| ENSG00000105404 | 0.660994  | 2.763089 | 0.345374 | 1 RABAC1        | -      |
| ENSG00000104885 | 0.624798  | 6.117215 | 0.345403 | 1 DOT1L         | K11427 |
| ENSG00000239665 | 0.677993  | 2.422072 | 0.345619 | 1 RP11-295P9.3  | -      |
| ENSG00000156253 | -0.628499 | 5.482099 | 0.346037 | 1 RWDD2B        | K09513 |
| ENSG00000163170 | -0.631543 | 5.110236 | 0.346662 | 1 BOLA3         | -      |
| ENSG00000131759 | 0.630539  | 4.722773 | 0.346743 | 1 RARA          | K08527 |
| ENSG00000176788 | 0.617266  | 10.45783 | 0.346758 | 1 BASP1         | K17272 |
| ENSG00000011028 | -0.64194  | 4.216643 | 0.346877 | 1 MRC2          | K06560 |
| ENSG00000141968 | -0.643379 | 3.618464 | 0.34714  | 1 VAV1          | K05730 |
| ENSG00000052802 | -0.623255 | 6.017819 | 0.347157 | 1 MSMO1         | K07750 |
| ENSG00000118181 | -0.739531 | 1.529139 | 0.347413 | 1 RPS25         | K02975 |
| ENSG00000173928 | -0.739531 | 1.529139 | 0.347413 | 1 SWSAP1        | K17985 |
| ENSG00000234147 | -0.700912 | 2.569944 | 0.347535 | 1 RP3-460G2.2   | -      |
| ENSG00000159593 | -0.620139 | 6.660233 | 0.347695 | 1 NAE1          | K04532 |
| ENSG00000090020 | 0.638915  | 4.252515 | 0.347704 | 1 SLC9A1        | K05742 |
| ENSG00000179855 | 0.626689  | 5.181153 | 0.347985 | 1 GIPC3         | -      |
| ENSG00000198753 | 0.94457   | 0.649652 | 0.348276 | 1 PLXNB3        | K06821 |
| ENSG00000244242 | 0.94457   | 0.649652 | 0.348276 | 1 IFITM10       | -      |
| ENSG00000241014 | -0.908444 | 0.73406  | 0.348276 | 1 RP11-244H3.1  | -      |
| ENSG00000241316 | -0.908444 | 0.73406  | 0.348276 | 1 RP11-81N13.1  | -      |
| ENSG00000125744 | 0.628006  | 5.07165  | 0.348527 | 1 RTN2          | -      |
| ENSG00000007264 | -0.620999 | 6.081206 | 0.348795 | 1 MATK          | K17692 |
| ENSG00000138756 | -0.6893   | 2.676526 | 0.349193 | 1 BMP2K         | K08854 |
| ENSG00000105708 | 0.688124  | 2.641113 | 0.349193 | 1 ZNF14         | K09228 |
| ENSG00000035499 | -0.635404 | 4.374699 | 0.34944  | 1 DEPDC1B       | -      |
| ENSG00000026950 | -0.624262 | 5.003818 | 0.349764 | 1 BTN3A1        | K06712 |
| ENSG00000160190 | -0.632103 | 4.538012 | 0.350099 | 1 SLC37A1       | K13783 |
| ENSG00000148459 | -0.632302 | 4.305554 | 0.350357 | 1 PDSS1         | K12504 |
| ENSG00000241990 | 0.691584  | 2.275677 | 0.350467 | 1 RP6-109B7.3   | -      |

|                 |           |           |          |                 |        |
|-----------------|-----------|-----------|----------|-----------------|--------|
| ENSG00000236943 | -0.67931  | 2.775764  | 0.350643 | 1 RP11-640M9.1  | -      |
| ENSG00000136379 | 0.616111  | 6.50729   | 0.350726 | 1 ABHD17C       | -      |
| ENSG00000138035 | -0.616571 | 6.434138  | 0.350989 | 1 PNPT1         | K00962 |
| ENSG00000177989 | -0.641978 | 3.724936  | 0.351916 | 1 ODF3B         | -      |
| ENSG00000173338 | 0.881335  | 0.833024  | 0.351957 | 1 KCNK7         | K04918 |
| ENSG00000156711 | 0.811518  | 0.861948  | 0.351957 | 1 MAPK13        | K04441 |
| ENSG00000245105 | 0.811518  | 0.861948  | 0.351957 | 1 A2M-AS1       | -      |
| ENSG00000177169 | 0.612653  | 7.331643  | 0.352011 | 1 ULK1          | K08269 |
| ENSG00000164631 | 0.619998  | 5.318633  | 0.352138 | 1 ZNF12         | K09228 |
| ENSG00000105849 | -0.618932 | 5.768689  | 0.352151 | 1 TWISTNB       | K03004 |
| ENSG00000105711 | 0.693516  | 2.388479  | 0.352237 | 1 SCN1B         | K04845 |
| ENSG00000229152 | 0.693516  | 2.388479  | 0.352237 | 1 ANKRD10-IT1   | -      |
| ENSG00000118257 | -0.745344 | 1.832593  | 0.352333 | 1 NRP2          | K06819 |
| ENSG00000180178 | 0.731722  | 1.772222  | 0.352333 | 1 FAR2P1        | K09228 |
| ENSG00000135148 | 0.613334  | 6.566946  | 0.352428 | 1 TRAFD1        | -      |
| ENSG00000122591 | -0.616183 | 6.133857  | 0.352518 | 1 FAM126A       | -      |
| ENSG00000159267 | -0.640607 | 3.976445  | 0.352521 | 1 HLCS          | K01942 |
| ENSG00000161180 | -1.352417 | -0.160613 | 0.352672 | 1 CCDC116       | -      |
| ENSG00000167895 | -1.352417 | -0.160613 | 0.352672 | 1 TMC8          | -      |
| ENSG00000213888 | -1.352417 | -0.160613 | 0.352672 | 1 AC005003.1    | K09228 |
| ENSG00000231177 | -1.352417 | -0.160613 | 0.352672 | 1 LINC00852     | -      |
| ENSG00000265452 | -1.352417 | -0.160613 | 0.352672 | 1 MIR3682       | -      |
| ENSG00000108854 | -1.260308 | -0.220081 | 0.352672 | 1 SMURF2        | K04678 |
| ENSG00000136883 | -1.260308 | -0.220081 | 0.352672 | 1 KIF12         | K10399 |
| ENSG00000151882 | -1.260308 | -0.220081 | 0.352672 | 1 CCL28         | K05513 |
| ENSG00000170965 | -1.260308 | -0.220081 | 0.352672 | 1 PLAC1         | -      |
| ENSG00000181085 | -1.260308 | -0.220081 | 0.352672 | 1 MAPK15        | K19603 |
| ENSG00000229474 | -1.260308 | -0.220081 | 0.352672 | 1 PATL2         | -      |
| ENSG00000233203 | -1.260308 | -0.220081 | 0.352672 | 1 RP11-67L3.4   | -      |
| ENSG00000250802 | -1.260308 | -0.220081 | 0.352672 | 1 ZBED3-AS1     | -      |
| ENSG00000251095 | -1.260308 | -0.220081 | 0.352672 | 1 RP11-115D19.1 | -      |
| ENSG00000267896 | -1.260308 | -0.220081 | 0.352672 | 1 AC018766.4    | -      |
| ENSG00000268166 | -1.260308 | -0.220081 | 0.352672 | 1 CTC-471F3.6   | -      |
| ENSG00000062524 | 1.211955  | -0.328686 | 0.352672 | 1 LTK           | K05118 |
| ENSG00000078900 | 1.211955  | -0.328686 | 0.352672 | 1 TP73          | K10148 |
| ENSG00000105982 | 1.211955  | -0.328686 | 0.352672 | 1 RNF32         | -      |
| ENSG00000117643 | 1.211955  | -0.328686 | 0.352672 | 1 MAN1C1        | K01230 |
| ENSG00000142920 | 1.211955  | -0.328686 | 0.352672 | 1 ADC           | K01583 |
| ENSG00000170835 | 1.211955  | -0.328686 | 0.352672 | 1 CEL           | K12298 |
| ENSG00000185710 | 1.211955  | -0.328686 | 0.352672 | 1 RP11-645C24.2 | K08873 |
| ENSG00000205978 | 1.211955  | -0.328686 | 0.352672 | 1 NYNRIN        | -      |
| ENSG00000212829 | 1.211955  | -0.328686 | 0.352672 | 1 RPS26P3       | K02976 |
| ENSG00000214725 | 1.211955  | -0.328686 | 0.352672 | 1 CDIPT-AS1     | -      |
| ENSG00000215835 | 1.211955  | -0.328686 | 0.352672 | 1 RP11-9L18.2   | K13209 |
| ENSG00000225693 | 1.211955  | -0.328686 | 0.352672 | 1 RP11-54K16.2  | K15902 |
| ENSG00000242474 | 1.211955  | -0.328686 | 0.352672 | 1 AC093627.9    | -      |
| ENSG00000248712 | 1.211955  | -0.328686 | 0.352672 | 1 CCDC153       | -      |
| ENSG00000272037 | 1.211955  | -0.328686 | 0.352672 | 1 KB-431C1.5    | -      |
| ENSG00000273472 | 1.211955  | -0.328686 | 0.352672 | 1 RP11-102N12.3 | -      |
| ENSG00000119630 | 1.023546  | -0.261284 | 0.352672 | 1 PGF           | K16859 |
| ENSG00000135929 | 1.023546  | -0.261284 | 0.352672 | 1 CYP27A1       | K00488 |
| ENSG00000179362 | 1.023546  | -0.261284 | 0.352672 | 1 HMG2P46       | K11300 |
| ENSG00000180616 | 1.023546  | -0.261284 | 0.352672 | 1 SSTR2         | K04218 |
| ENSG00000187726 | 1.023546  | -0.261284 | 0.352672 | 1 DNAJB13       | K09519 |
| ENSG00000204869 | 1.023546  | -0.261284 | 0.352672 | 1 IGFL4         | -      |
| ENSG00000219682 | 1.023546  | -0.261284 | 0.352672 | 1 RP3-425P12.4  | K14295 |
| ENSG00000230526 | 1.023546  | -0.261284 | 0.352672 | 1 RP11-472G21.2 | -      |
| ENSG00000231131 | 1.023546  | -0.261284 | 0.352672 | 1 RP11-346D6.6  | -      |



|                 |           |           |          |                  |        |
|-----------------|-----------|-----------|----------|------------------|--------|
| ENSG00000232450 | 1.023546  | -0.261284 | 0.352672 | 1 RP4-730K3.3    | K02981 |
| ENSG00000232775 | 1.023546  | -0.261284 | 0.352672 | 1 AP000525.10    | K14569 |
| ENSG00000236345 | 1.023546  | -0.261284 | 0.352672 | 1 RP11-59D5__B.2 | -      |
| ENSG00000241278 | 1.023546  | -0.261284 | 0.352672 | 1 ENPP7P4        | K12354 |
| ENSG00000266927 | 1.023546  | -0.261284 | 0.352672 | 1 AC006273.7     | -      |
| ENSG00000270006 | 1.023546  | -0.261284 | 0.352672 | 1 RP11-178L8.7   | -      |
| ENSG00000168404 | -0.627761 | 4.611415  | 0.352781 | 1 MLKL           | K08849 |
| ENSG00000112773 | 0.612575  | 6.518355  | 0.353082 | 1 FAM46A         | -      |
| ENSG00000153574 | -0.62784  | 4.760887  | 0.353192 | 1 RPIA           | K01807 |
| ENSG00000105339 | 0.613565  | 6.018884  | 0.353456 | 1 DENND3         | -      |
| ENSG00000091592 | -0.736489 | 1.892942  | 0.353571 | 1 NLRP1          | K11447 |
| ENSG0000013563  | 0.675044  | 2.501607  | 0.353741 | 1 DNASE1L1       | K11995 |
| ENSG00000159055 | -0.627267 | 4.817829  | 0.353904 | 1 MIS18A         | K11564 |
| ENSG00000125821 | -0.618793 | 4.828616  | 0.354039 | 1 DTD1           | K07560 |
| ENSG00000145715 | -0.619893 | 5.042812  | 0.354044 | 1 RASA1          | K04352 |
| ENSG00000271529 | 0.699896  | 1.942019  | 0.354665 | 1 CICIP14        | K16941 |
| ENSG00000197157 | 0.607971  | 8.347903  | 0.354731 | 1 SND1           | K15979 |
| ENSG00000230457 | -0.818982 | 1.085816  | 0.354733 | 1 PA2G4P4        | -      |
| ENSG00000206567 | 0.771657  | 1.021373  | 0.354733 | 1 AC022007.5     | -      |
| ENSG00000169957 | -0.615742 | 5.250098  | 0.355357 | 1 ZNF768         | K09228 |
| ENSG00000255624 | -0.714096 | 2.060122  | 0.355639 | 1 RP11-564D11.3  | -      |
| ENSG00000255717 | -0.608241 | 7.304189  | 0.355754 | 1 SNHG1          | -      |
| ENSG00000171681 | -0.631773 | 4.041592  | 0.355833 | 1 ATF7IP         | -      |
| ENSG00000198947 | -0.611543 | 5.894603  | 0.355855 | 1 DMD            | K10366 |
| ENSG00000197982 | -0.616921 | 5.101317  | 0.355942 | 1 C1orf122       | -      |
| ENSG00000124839 | 0.623441  | 4.044657  | 0.356041 | 1 RAB17          | K07909 |
| ENSG00000221886 | 0.6393    | 3.520541  | 0.356144 | 1 C5orf54        | -      |
| ENSG00000136319 | -0.660793 | 3.199573  | 0.356189 | 1 TTC5           | -      |
| ENSG00000152256 | 0.617995  | 5.022462  | 0.356388 | 1 PDK1           | K12077 |
| ENSG00000141854 | 0.701508  | 2.082485  | 0.356511 | 1 hsa-mir-1199   | -      |
| ENSG00000254685 | -0.627373 | 4.325297  | 0.356684 | 1 FPGT           | K00976 |
| ENSG00000143384 | -0.605244 | 8.725838  | 0.356757 | 1 MCL1           | K02539 |
| ENSG00000175727 | 0.60896   | 6.262313  | 0.356846 | 1 MLXIP          | K09113 |
| ENSG00000010404 | -0.831294 | 1.207475  | 0.356891 | 1 IDS            | K01136 |
| ENSG00000063601 | -0.831294 | 1.207475  | 0.356891 | 1 MTMR1          | K18081 |
| ENSG00000146666 | -0.831294 | 1.207475  | 0.356891 | 1 LINC00525      | -      |
| ENSG00000162894 | -0.831294 | 1.207475  | 0.356891 | 1 FAIM3          | -      |
| ENSG00000238045 | -0.831294 | 1.207475  | 0.356891 | 1 AC009133.14    | -      |
| ENSG00000261051 | 0.793921  | 1.141998  | 0.356891 | 1 RP11-274H2.5   | -      |
| ENSG00000257365 | -0.69642  | 2.209862  | 0.357297 | 1 FNTB           | K05954 |
| ENSG00000123999 | 0.663845  | 2.164252  | 0.357297 | 1 INHA           | K05500 |
| ENSG00000214193 | 0.638108  | 3.302015  | 0.357558 | 1 SH3D21         | -      |
| ENSG00000143061 | -0.607675 | 6.402461  | 0.357732 | 1 IGSF3          | K06522 |
| ENSG00000115252 | 0.610409  | 5.27388   | 0.357803 | 1 PDE1A          | K13755 |
| ENSG00000215114 | -0.624344 | 4.442602  | 0.357894 | 1 UBXN2B         | K14012 |
| ENSG00000075624 | -0.602892 | 11.5825   | 0.357919 | 1 ACTB           | K05692 |
| ENSG00000146776 | -0.706729 | 2.266234  | 0.358009 | 1 ATXN7L1        | K11318 |
| ENSG00000162545 | 0.652081  | 2.927939  | 0.358416 | 1 CAMK2N1        | -      |
| ENSG00000179218 | 0.602308  | 10.77421  | 0.358443 | 1 CALR           | K08057 |
| ENSG00000141985 | 0.605592  | 6.710309  | 0.358566 | 1 SH3GL1         | K11247 |
| ENSG00000213462 | 0.762424  | 1.27481   | 0.358608 | 1 ERV3-1         | K09228 |
| ENSG00000114200 | -0.735371 | 1.348956  | 0.358608 | 1 BCHE           | K01050 |
| ENSG00000225518 | -0.735371 | 1.348956  | 0.358608 | 1 RP11-396C23.2  | -      |
| ENSG00000248092 | -0.735371 | 1.348956  | 0.358608 | 1 NNT-AS1        | -      |
| ENSG00000030582 | 0.602362  | 9.320615  | 0.358702 | 1 GRN            | -      |
| ENSG00000148200 | 0.643398  | 3.453899  | 0.358972 | 1 NR6A1          | K08561 |
| ENSG00000155034 | 0.633286  | 3.458076  | 0.358972 | 1 FBXL18         | K10284 |
| ENSG00000204147 | -0.656259 | 3.038064  | 0.35915  | 1 ASAH2B         | K12349 |

|                 |           |          |          |                 |        |
|-----------------|-----------|----------|----------|-----------------|--------|
| ENSG00000166261 | -0.645018 | 3.503486 | 0.359222 | 1 ZNF202        | K09229 |
| ENSG00000121931 | -0.662889 | 3.069889 | 0.359489 | 1 LRIF1         | -      |
| ENSG00000118418 | -0.604816 | 6.510513 | 0.359669 | 1 HMGN3         | K11301 |
| ENSG00000164855 | 0.614445  | 4.996534 | 0.35991  | 1 TMEM184A      | -      |
| ENSG00000186350 | 0.606413  | 5.725857 | 0.360071 | 1 RXRA          | K08524 |
| ENSG00000081377 | -0.625972 | 3.981843 | 0.360275 | 1 CDC14B        | K06639 |
| ENSG00000189042 | -0.679716 | 2.516522 | 0.360288 | 1 ZNF567        | K09228 |
| ENSG00000198363 | 0.59975   | 9.543345 | 0.360708 | 1 ASPH          | K00476 |
| ENSG00000114473 | -0.688546 | 2.56215  | 0.360748 | 1 IQCG          | -      |
| ENSG00000244026 | -0.688546 | 2.56215  | 0.360748 | 1 FAM86DP       | -      |
| ENSG00000091317 | -0.610015 | 4.959481 | 0.360841 | 1 CMTM6         | -      |
| ENSG00000119138 | 0.602451  | 6.304636 | 0.360913 | 1 KLF9          | K09208 |
| ENSG00000141867 | 0.607323  | 5.744843 | 0.360997 | 1 BRD4          | K11722 |
| ENSG00000037965 | 0.71424   | 1.50863  | 0.361157 | 1 HOXC8         | K09308 |
| ENSG00000141012 | 0.607355  | 5.486933 | 0.361579 | 1 GALNS         | K01132 |
| ENSG00000105357 | 1.026574  | 0.010275 | 0.361697 | 1 MYH14         | K10352 |
| ENSG00000117242 | 1.026574  | 0.010275 | 0.361697 | 1 PINK1-AS      | -      |
| ENSG00000222937 | 1.026574  | 0.010275 | 0.361697 | 1 SNORD63       | -      |
| ENSG00000224846 | 1.026574  | 0.010275 | 0.361697 | 1 RP1-90J20.8   | -      |
| ENSG00000229808 | 1.026574  | 0.010275 | 0.361697 | 1 RP11-456P18.2 | K06698 |
| ENSG00000266235 | 1.026574  | 0.010275 | 0.361697 | 1 MIR3176       | -      |
| ENSG00000149922 | 0.891241  | 0.063029 | 0.361697 | 1 TBX6          | K10180 |
| ENSG00000204529 | 0.891241  | 0.063029 | 0.361697 | 1 GUCY2EP       | K12322 |
| ENSG00000268856 | 0.891241  | 0.063029 | 0.361697 | 1 AP001579.1    | -      |
| ENSG00000184985 | 0.62597   | 3.823473 | 0.361942 | 1 SORCS2        | -      |
| ENSG00000159231 | -0.627801 | 3.863555 | 0.362093 | 1 CBR3          | K00084 |
| ENSG00000163328 | 0.733698  | 1.596342 | 0.362123 | 1 GPR155        | -      |
| ENSG00000244171 | -0.621166 | 4.228196 | 0.362175 | 1 PBX2P1        | K15609 |
| ENSG00000182551 | -0.602044 | 6.297407 | 0.362399 | 1 ADI1          | K08967 |
| ENSG00000144355 | -0.634598 | 3.456207 | 0.362507 | 1 DLX1          | K09314 |
| ENSG00000140263 | -0.602869 | 6.151222 | 0.362527 | 1 SORD          | K00008 |
| ENSG00000128617 | 0.644537  | 2.770003 | 0.362605 | 1 OPN1SW        | K04252 |
| ENSG00000140297 | 0.644537  | 2.770003 | 0.362605 | 1 GCNT3         | K09662 |
| ENSG00000130518 | -0.755064 | 1.769595 | 0.362944 | 1 KIAA1683      | -      |
| ENSG00000159885 | -0.755064 | 1.769595 | 0.362944 | 1 ZNF222        | K09228 |
| ENSG00000223396 | -0.755064 | 1.769595 | 0.362944 | 1 RPS10P7       | -      |
| ENSG00000111850 | -0.658138 | 2.892127 | 0.36319  | 1 SMIM8         | -      |
| ENSG00000101928 | 0.599999  | 6.599919 | 0.3634   | 1 MOSPD1        | -      |
| ENSG00000185928 | -0.651396 | 2.97799  | 0.363707 | 1 PAGR1         | K14973 |
| ENSG00000115392 | -0.604835 | 5.410888 | 0.363857 | 1 FANCL         | K10606 |
| ENSG00000143437 | 0.601656  | 5.977585 | 0.363953 | 1 ARNT          | K09097 |
| ENSG00000104325 | -0.606932 | 5.082056 | 0.364183 | 1 DECR1         | K13236 |
| ENSG00000113721 | 0.635995  | 3.096772 | 0.364583 | 1 PDGFRB        | K05089 |
| ENSG00000171105 | 0.606492  | 5.181183 | 0.364746 | 1 INSR          | K04527 |
| ENSG00000163536 | 0.615904  | 3.878406 | 0.365051 | 1 SERPINI1      | -      |
| ENSG00000182378 | 0.600003  | 6.116527 | 0.365291 | 1 PLCXD1        | -      |
| ENSG00000146409 | -0.611457 | 4.424296 | 0.365331 | 1 SLC18B1       | -      |
| ENSG00000170485 | -0.611869 | 4.808438 | 0.365466 | 1 NPAS2         | K09026 |
| ENSG00000164070 | -0.605941 | 5.341385 | 0.365491 | 1 HSPA4L        | K09485 |
| ENSG00000039560 | -0.603761 | 5.394343 | 0.36573  | 1 RAI14         | -      |
| ENSG00000165115 | -0.671488 | 2.29218  | 0.366382 | 1 KIF27         | K10395 |
| ENSG00000212994 | 0.661262  | 2.258698 | 0.366382 | 1 RPS26P6       | K02976 |
| ENSG00000129993 | 0.62326   | 3.501544 | 0.366496 | 1 CBFA2T3       | K10053 |
| ENSG00000245532 | 0.592225  | 10.25214 | 0.366567 | 1 NEAT1         | -      |
| ENSG00000164509 | -0.951655 | 0.40193  | 0.366588 | 1 IL31RA        | K08857 |
| ENSG00000171872 | -0.951655 | 0.40193  | 0.366588 | 1 KLF17         | K09211 |
| ENSG00000227199 | -0.951655 | 0.40193  | 0.366588 | 1 ST7-AS1       | -      |
| ENSG00000246985 | -0.951655 | 0.40193  | 0.366588 | 1 SOCS2-AS1     | -      |

|                 |           |           |          |                 |        |
|-----------------|-----------|-----------|----------|-----------------|--------|
| ENSG00000132881 | 0.91466   | 0.284949  | 0.366588 | 1 RSG1          | -      |
| ENSG00000182580 | 0.91466   | 0.284949  | 0.366588 | 1 EPHB3         | K05112 |
| ENSG00000185055 | 0.91466   | 0.284949  | 0.366588 | 1 EFCAB10       | -      |
| ENSG00000198598 | 0.91466   | 0.284949  | 0.366588 | 1 MMP17         | K07997 |
| ENSG00000260778 | 0.91466   | 0.284949  | 0.366588 | 1 MIR940        | -      |
| ENSG00000267270 | 0.91466   | 0.284949  | 0.366588 | 1 AC139100.2    | -      |
| ENSG00000157600 | 0.596608  | 5.98662   | 0.366602 | 1 TMEM164       | -      |
| ENSG00000105483 | -0.62454  | 3.625307  | 0.366905 | 1 CARD8         | K12801 |
| ENSG00000173145 | -0.599114 | 5.928051  | 0.367037 | 1 NOC3L         | K14834 |
| ENSG00000140332 | 0.594087  | 7.068752  | 0.367088 | 1 TLE3          | K04497 |
| ENSG00000231365 | -0.627364 | 3.681033  | 0.367088 | 1 RP11-418J17.1 | -      |
| ENSG00000167700 | -0.599036 | 5.756625  | 0.36716  | 1 MFSD3         | -      |
| ENSG00000104976 | 0.609525  | 4.389064  | 0.367174 | 1 SNAPC2        | K15209 |
| ENSG00000139684 | -0.631988 | 3.701434  | 0.367175 | 1 ESD           | K01070 |
| ENSG00000142556 | 0.656983  | 2.430959  | 0.367202 | 1 ZNF614        | K09228 |
| ENSG00000176845 | 0.593924  | 6.801006  | 0.367679 | 1 METRNL        | -      |
| ENSG00000123106 | -0.604718 | 4.578715  | 0.367764 | 1 CCDC91        | -      |
| ENSG00000104689 | -0.620419 | 3.904972  | 0.367842 | 1 TNFRSF10A     | K04722 |
| ENSG00000176994 | 0.611528  | 3.948439  | 0.368027 | 1 SMCR8         | -      |
| ENSG00000138686 | -0.615393 | 4.003729  | 0.368142 | 1 BBS7          | K16749 |
| ENSG00000166311 | 0.598341  | 5.232388  | 0.368295 | 1 SMPD1         | K12350 |
| ENSG00000150347 | 0.597733  | 5.704083  | 0.36858  | 1 ARID5B        | -      |
| ENSG00000135972 | -0.595748 | 6.021915  | 0.369282 | 1 MRPS9         | K02996 |
| ENSG00000253948 | 0.839553  | 0.515868  | 0.369464 | 1 RP11-410L14.2 | -      |
| ENSG00000260404 | 0.839553  | 0.515868  | 0.369464 | 1 RP11-384K6.6  | -      |
| ENSG00000272447 | 0.839553  | 0.515868  | 0.369464 | 1 RP11-182L21.6 | -      |
| ENSG00000085185 | 0.602779  | 4.722893  | 0.369772 | 1 BCORL1        | -      |
| ENSG00000106823 | -0.622342 | 3.427787  | 0.369891 | 1 ECM2          | K08119 |
| ENSG00000002586 | 0.591965  | 6.29007   | 0.37031  | 1 CD99          | K06520 |
| ENSG00000198399 | -0.613413 | 4.223455  | 0.370948 | 1 ITSN2         | -      |
| ENSG00000067601 | -0.829869 | 0.833535  | 0.371253 | 1 PMS2P4        | K10858 |
| ENSG00000271936 | -0.829869 | 0.833535  | 0.371253 | 1 RP11-443B20.1 | -      |
| ENSG00000272476 | -0.829869 | 0.833535  | 0.371253 | 1 RP1-191J18.66 | -      |
| ENSG00000196741 | -0.785704 | 0.805281  | 0.371253 | 1 CXorf24       | -      |
| ENSG00000205436 | 0.785594  | 0.715067  | 0.371253 | 1 EXOC3L4       | -      |
| ENSG00000034677 | 0.588114  | 7.452955  | 0.371369 | 1 RNF19A        | K11972 |
| ENSG00000186111 | 0.597222  | 5.114226  | 0.371548 | 1 PIP5K1C       | K00889 |
| ENSG00000082153 | 0.586478  | 8.587729  | 0.371748 | 1 BZW1          | -      |
| ENSG00000272655 | -0.843435 | 0.977906  | 0.372408 | 1 POLR2J4       | K03008 |
| ENSG00000166575 | -0.601169 | 4.667456  | 0.372936 | 1 TMEM135       | -      |
| ENSG00000100027 | -2.044268 | -0.866855 | 0.372947 | 1 YPEL1         | -      |
| ENSG00000132965 | -2.044268 | -0.866855 | 0.372947 | 1 ALOX5AP       | -      |
| ENSG00000137310 | -2.044268 | -0.866855 | 0.372947 | 1 TCF19         | -      |
| ENSG00000183690 | -2.044268 | -0.866855 | 0.372947 | 1 EFHC2         | -      |
| ENSG00000199753 | -2.044268 | -0.866855 | 0.372947 | 1 SNORD104      | -      |
| ENSG00000214770 | -2.044268 | -0.866855 | 0.372947 | 1 RP11-544I20.2 | -      |
| ENSG00000224725 | -2.044268 | -0.866855 | 0.372947 | 1 CEP57L1P1     | K16762 |
| ENSG00000229447 | -2.044268 | -0.866855 | 0.372947 | 1 RP11-490K7.4  | K03123 |
| ENSG00000232600 | -2.044268 | -0.866855 | 0.372947 | 1 AC084125.4    | -      |
| ENSG00000238123 | -2.044268 | -0.866855 | 0.372947 | 1 MID1IP1-AS1   | -      |
| ENSG00000254343 | -2.044268 | -0.866855 | 0.372947 | 1 RP11-760H22.2 | -      |
| ENSG00000261737 | -2.044268 | -0.866855 | 0.372947 | 1 RP4-612B15.3  | -      |
| ENSG00000270067 | -2.044268 | -0.866855 | 0.372947 | 1 CTC-487M23.5  | -      |
| ENSG00000273030 | -2.044268 | -0.866855 | 0.372947 | 1 RP11-285F16.1 | -      |
| ENSG00000101049 | -1.877647 | -0.968243 | 0.372947 | 1 SGK2          | K13303 |
| ENSG00000106006 | -1.877647 | -0.968243 | 0.372947 | 1 HOXA6         | K09306 |
| ENSG00000126861 | -1.877647 | -0.968243 | 0.372947 | 1 OMG           | K16666 |
| ENSG00000163376 | -1.877647 | -0.968243 | 0.372947 | 1 KBTBD8        | K10475 |

|                 |           |           |          |                  |              |
|-----------------|-----------|-----------|----------|------------------|--------------|
| ENSG00000168491 | -1.877647 | -0.968243 | 0.372947 | 1 CCDC110        | -            |
| ENSG00000172232 | -1.877647 | -0.968243 | 0.372947 | 1 AZU1           | K01350       |
| ENSG00000180113 | -1.877647 | -0.968243 | 0.372947 | 1 TDRD6          | K18405       |
| ENSG00000183395 | -1.877647 | -0.968243 | 0.372947 | 1 PMCH           | K05229       |
| ENSG00000186204 | -1.877647 | -0.968243 | 0.372947 | 1 CYP4F12        | K17730       |
| ENSG00000186652 | -1.877647 | -0.968243 | 0.372947 | 1 PRG2           | K10786       |
| ENSG00000188092 | -1.877647 | -0.968243 | 0.372947 | 1 GPR89B         | -            |
| ENSG00000201772 | -1.877647 | -0.968243 | 0.372947 | 1 SNORA5C        | -            |
| ENSG00000222881 | -1.877647 | -0.968243 | 0.372947 | 1 Y_RNA          | -            |
| ENSG00000223374 | -1.877647 | -0.968243 | 0.372947 | 1 AC005104.3     | -            |
| ENSG00000223508 | -1.877647 | -0.968243 | 0.372947 | 1 RPL23AP53      | K02893       |
| ENSG00000224854 | -1.877647 | -0.968243 | 0.372947 | 1 C9orf53        | -            |
| ENSG00000226141 | -1.877647 | -0.968243 | 0.372947 | 1 AF277315.13    | -            |
| ENSG00000229122 | -1.877647 | -0.968243 | 0.372947 | 1 AGBL5-IT1      | -            |
| ENSG00000233560 | -1.877647 | -0.968243 | 0.372947 | 1 KRT8P39        | K07605       |
| ENSG00000236066 | -1.877647 | -0.968243 | 0.372947 | 1 RP11-389O22.1  | -            |
| ENSG00000250155 | -1.877647 | -0.968243 | 0.372947 | 1 CTD-2353F22.1  | -            |
| ENSG00000250410 | -1.877647 | -0.968243 | 0.372947 | 1 RP11-714G18.1  | -            |
| ENSG00000254876 | -1.877647 | -0.968243 | 0.372947 | 1 RP11-23J9.5    | -            |
| ENSG00000255568 | -1.877647 | -0.968243 | 0.372947 | 1 BRWD1-IT2      | -            |
| ENSG00000255992 | -1.877647 | -0.968243 | 0.372947 | 1 RP11-417L19.4  | -            |
| ENSG00000258302 | -1.877647 | -0.968243 | 0.372947 | 1 RP11-981P6.1   | -            |
| ENSG00000260944 | -1.877647 | -0.968243 | 0.372947 | 1 RP11-463O9.5   | -            |
| ENSG00000261468 | -1.877647 | -0.968243 | 0.372947 | 1 RP11-1024P17.1 | -            |
| ENSG00000266441 | -1.877647 | -0.968243 | 0.372947 | 1 RP11-91I8.3    | -            |
| ENSG00000244879 | 0.60779   | 3.820595  | 0.373425 | 1 GABPB1-AS1     | -            |
| ENSG00000168807 | 0.590261  | 5.589119  | 0.373465 | 1 SNTB2          | K12196       |
| ENSG00000107819 | 0.586725  | 6.267401  | 0.373534 | 1 SFXN3          | -            |
| ENSG00000165046 | -0.78046  | 1.279906  | 0.373369 | 1 LETM2          | -            |
| ENSG00000231822 | -0.78046  | 1.279906  | 0.373369 | 1 AC019097.7     | K06669       |
| ENSG00000172785 | -0.623465 | 3.407307  | 0.373749 | 1 CBWD1          | -            |
| ENSG00000251474 | 0.62317   | 3.29338   | 0.373823 | 1 RPL32P3        | K02912       |
| ENSG00000271870 | 0.772489  | 1.326846  | 0.374041 | 1 RP11-97C16.1   | -            |
| ENSG00000082014 | 0.627593  | 3.012496  | 0.374052 | 1 SMARCD3        | K11650       |
| ENSG00000174093 | 0.63746   | 2.934065  | 0.374117 | 1 RP11-1407O15.2 | K08776       |
| ENSG00000123178 | -0.59504  | 4.978992  | 0.374127 | 1 SPRYD7         | K11447       |
| ENSG00000136854 | 0.586657  | 6.563606  | 0.374171 | 1 STXBP1         | K15292       |
| ENSG00000151470 | -0.63003  | 2.84333   | 0.37422  | 1 C4orf33        | -            |
| ENSG00000180596 | 0.703546  | 1.462766  | 0.37428  | 1 HIST1H2BC      | K11252       |
| ENSG00000184702 | 0.703546  | 1.462766  | 0.37428  | 1                | 5-Sep K04557 |
| ENSG00000130940 | 0.640881  | 2.614245  | 0.374367 | 1 CASZ1          | -            |
| ENSG00000156398 | -0.645342 | 2.61203   | 0.374404 | 1 SFXN2          | K07944       |
| ENSG00000213533 | 0.724271  | 1.55313   | 0.374441 | 1 TMEM110        | -            |
| ENSG00000205060 | -0.599551 | 4.70986   | 0.374513 | 1 SLC35B4        | K15278       |
| ENSG00000147168 | -0.683557 | 1.982846  | 0.374665 | 1 IL2RG          | K05070       |
| ENSG00000214226 | -0.664491 | 1.97084   | 0.374665 | 1 C17orf67       | -            |
| ENSG00000177946 | -0.696211 | 2.048791  | 0.374666 | 1 CENPBD1        | -            |
| ENSG00000065618 | 0.650125  | 1.999939  | 0.374666 | 1 COL17A1        | K07603       |
| ENSG00000118260 | -0.606425 | 4.378715  | 0.37509  | 1 CREB1          | K05870       |
| ENSG00000185989 | 0.5842    | 7.04493   | 0.375112 | 1 RASA3          | K12380       |
| ENSG00000115756 | 0.585789  | 6.499923  | 0.375188 | 1 HPCAL1         | K19695       |
| ENSG00000196498 | 0.583596  | 7.110993  | 0.3755   | 1 NCOR2          | K06065       |
| ENSG00000116574 | 0.590883  | 4.915878  | 0.375583 | 1 RHOU           | -            |
| ENSG00000196776 | -0.592739 | 5.408826  | 0.375613 | 1 CD47           | K06266       |
| ENSG00000116679 | -0.583473 | 7.216447  | 0.375704 | 1 IVNS1ABP       | K15046       |
| ENSG00000107882 | 0.596488  | 4.028867  | 0.375809 | 1 SUFU           | K06229       |
| ENSG00000145246 | -0.605151 | 4.025292  | 0.375854 | 1 ATP10D         | K01530       |
| ENSG00000105355 | 0.58229   | 7.655382  | 0.375872 | 1 PLIN3          | -            |

|                 |           |          |          |                 |        |
|-----------------|-----------|----------|----------|-----------------|--------|
| ENSG00000234072 | 0.614775  | 3.687023 | 0.376702 | 1 AC074117.10   | -      |
| ENSG00000145022 | 0.610573  | 3.532444 | 0.377161 | 1 TCTA          | K09228 |
| ENSG00000065308 | 0.582766  | 6.310689 | 0.377198 | 1 TRAM2         | K12581 |
| ENSG00000179862 | -0.582509 | 6.761389 | 0.377344 | 1 CITED4        | -      |
| ENSG00000115919 | 0.579768  | 8.281173 | 0.377398 | 1 KYNU          | K01556 |
| ENSG00000128165 | -0.603248 | 4.276275 | 0.377454 | 1 ADM2          | -      |
| ENSG00000243566 | -0.61453  | 3.443848 | 0.377523 | 1 UPK3B         | -      |
| ENSG00000096968 | -0.615526 | 3.423595 | 0.377622 | 1 JAK2          | K04447 |
| ENSG00000161179 | -0.584231 | 6.028653 | 0.377648 | 1 YDJC          | -      |
| ENSG00000108064 | -0.582611 | 6.557312 | 0.377762 | 1 TFAM          | K11830 |
| ENSG00000133706 | -0.58001  | 7.766159 | 0.377797 | 1 LARS          | K01869 |
| ENSG00000115084 | -0.586192 | 5.394335 | 0.378646 | 1 SLC35F5       | K15289 |
| ENSG00000172262 | -0.581187 | 6.551733 | 0.379137 | 1 ZNF131        | -      |
| ENSG00000213983 | -0.607246 | 3.737667 | 0.379736 | 1 AP1G2         | K12391 |
| ENSG00000134152 | -0.592704 | 4.904987 | 0.379839 | 1 KATNBL1       | -      |
| ENSG00000151233 | -0.590278 | 4.903519 | 0.379839 | 1 GXYLT1        | K13676 |
| ENSG00000187583 | -0.640286 | 2.849693 | 0.379901 | 1 PLEKHN1       | -      |
| ENSG00000105290 | 0.58814   | 5.130651 | 0.379904 | 1 APLP1         | K05639 |
| ENSG00000113389 | 0.580165  | 6.050346 | 0.380094 | 1 NPR3          | K12325 |
| ENSG00000148950 | -0.610234 | 3.670517 | 0.380103 | 1 IMMP1L        | K09647 |
| ENSG00000236753 | 0.633973  | 2.731237 | 0.380326 | 1 MKLN1-AS      | -      |
| ENSG00000164403 | -0.615306 | 3.563539 | 0.380652 | 1 SHROOM1       | K18625 |
| ENSG00000104205 | -0.628852 | 2.674805 | 0.380799 | 1 SGK3          | K13304 |
| ENSG00000100330 | 0.583801  | 5.161697 | 0.380924 | 1 MTMR3         | K18082 |
| ENSG00000198198 | 0.585465  | 4.696084 | 0.380966 | 1 SZT2          | K09537 |
| ENSG00000115368 | -0.579407 | 6.382761 | 0.38102  | 1 WDR75         | K14552 |
| ENSG00000217801 | 0.594864  | 3.945776 | 0.381382 | 1 RP11-465B22.3 | -      |
| ENSG00000053254 | -0.589838 | 4.335902 | 0.381411 | 1 FOXN3         | K09407 |
| ENSG00000198752 | 0.577209  | 6.54533  | 0.381419 | 1 CDC42BPB      | K16307 |
| ENSG00000169740 | -0.587575 | 4.632539 | 0.381419 | 1 ZNF32         | -      |
| ENSG00000258429 | -0.616551 | 3.403052 | 0.381635 | 1 PDF           | K01462 |
| ENSG00000221930 | 0.601523  | 3.346548 | 0.381822 | 1 FAM45B        | -      |
| ENSG00000101160 | 0.573687  | 9.225867 | 0.381922 | 1 CTSZ          | K08568 |
| ENSG00000166250 | 0.580047  | 5.830762 | 0.382139 | 1 CLMP          | K06789 |
| ENSG00000115507 | -0.613602 | 3.313285 | 0.382218 | 1 OTX1          | K09326 |
| ENSG00000167283 | 0.611576  | 3.252744 | 0.382428 | 1 ATP5L         | K02140 |
| ENSG00000053900 | -0.585384 | 4.709799 | 0.382553 | 1 ANAPC4        | K03351 |
| ENSG00000164219 | -0.590408 | 4.43229  | 0.382787 | 1 PGGT1B        | K11713 |
| ENSG00000167549 | 0.584611  | 5.036005 | 0.382981 | 1 CORO6         | K13886 |
| ENSG00000064652 | -0.583948 | 4.861978 | 0.382988 | 1 SNX24         | K17941 |
| ENSG00000153767 | -0.589403 | 4.84991  | 0.383068 | 1 GTF2E1        | K03136 |
| ENSG00000124191 | -0.628761 | 3.17971  | 0.383116 | 1 TOX2          | -      |
| ENSG00000183111 | 0.610736  | 3.1576   | 0.383116 | 1 ARHGEF37      | -      |
| ENSG00000053747 | 0.581143  | 5.17515  | 0.383165 | 1 LAMA3         | K06240 |
| ENSG00000196700 | -0.583072 | 5.157492 | 0.383364 | 1 ZNF512B       | -      |
| ENSG00000106683 | 0.638827  | 2.174998 | 0.383391 | 1 LIMK1         | K05743 |
| ENSG00000143590 | 0.599681  | 3.635159 | 0.383518 | 1 EFNA3         | K05462 |
| ENSG00000154814 | -0.600023 | 3.628499 | 0.383709 | 1 OXNAD1        | -      |
| ENSG00000185885 | 0.573172  | 7.342882 | 0.383718 | 1 IFITM1        | K06566 |
| ENSG00000106638 | -0.668396 | 2.140544 | 0.383825 | 1 TBL2          | -      |
| ENSG00000100442 | -0.574377 | 6.691619 | 0.384165 | 1 FKBP3         | K09570 |
| ENSG00000273033 | 0.658652  | 2.031928 | 0.384293 | 1 RP11-67L2.2   | -      |
| ENSG00000213160 | -0.585851 | 4.692984 | 0.384332 | 1 KLHL23        | K10460 |
| ENSG00000171867 | -0.573619 | 6.766252 | 0.384623 | 1 PRNP          | K05634 |
| ENSG00000085465 | 0.670251  | 1.954697 | 0.384798 | 1 OVGPI         | K17526 |
| ENSG00000160678 | 0.670251  | 1.954697 | 0.384798 | 1 S100A1        | -      |
| ENSG00000108306 | 0.618115  | 2.923042 | 0.38481  | 1 FBXL20        | K10268 |
| ENSG00000183647 | 0.618115  | 2.923042 | 0.38481  | 1 ZNF530        | K09228 |

|                 |           |          |          |                   |        |
|-----------------|-----------|----------|----------|-------------------|--------|
| ENSG00000168487 | 0.573594  | 6.50812  | 0.384934 | 1 BMP1            | K05502 |
| ENSG00000105971 | -0.571242 | 7.747599 | 0.38503  | 1 CAV2            | K12958 |
| ENSG00000165060 | -0.587682 | 4.146243 | 0.38508  | 1 FXN             | K19054 |
| ENSG00000038219 | 0.574953  | 5.713312 | 0.385416 | 1 BOD1L1          | -      |
| ENSG00000135318 | -0.579679 | 5.516906 | 0.385538 | 1 NT5E            | K01081 |
| ENSG00000175170 | 0.664869  | 1.800836 | 0.385936 | 1 FAM182B         | -      |
| ENSG00000196754 | -0.6339   | 2.780949 | 0.386264 | 1 S100A2          | -      |
| ENSG00000100911 | -0.572785 | 6.360062 | 0.386346 | 1 PSME2           | K06697 |
| ENSG00000198886 | 0.567582  | 12.86187 | 0.386508 | 1 MT-ND4          | K03881 |
| ENSG00000204792 | 0.714577  | 1.694609 | 0.386579 | 1 AC104135.3      | -      |
| ENSG00000207547 | -0.710785 | 1.741362 | 0.386579 | 1 MIR25           | -      |
| ENSG00000262251 | 0.679101  | 1.709844 | 0.386579 | 1 RP11-199F11.2   | -      |
| ENSG00000121417 | 0.628474  | 2.711465 | 0.386681 | 1 ZNF211          | K09228 |
| ENSG00000064199 | -0.624931 | 2.741865 | 0.386681 | 1 SPA17           | K12581 |
| ENSG00000185238 | -0.577018 | 5.490877 | 0.386718 | 1 PRMT3           | K11436 |
| ENSG00000151131 | -0.58863  | 4.596827 | 0.386908 | 1 C12orf45        | -      |
| ENSG00000083838 | 0.634464  | 2.663675 | 0.387124 | 1 ZNF446          | K09229 |
| ENSG00000101384 | -0.575676 | 5.213969 | 0.387529 | 1 JAG1            | K06052 |
| ENSG00000137210 | -0.568773 | 7.301598 | 0.387656 | 1 TMEM14B         | -      |
| ENSG00000099860 | 0.572174  | 5.912592 | 0.387935 | 1 GADD45B         | K04402 |
| ENSG00000175274 | 0.588084  | 4.296074 | 0.388008 | 1 TP53I11         | -      |
| ENSG00000107263 | 0.57264   | 5.539873 | 0.388025 | 1 RAPGEF1         | K06277 |
| ENSG00000112365 | -0.57906  | 4.476136 | 0.388186 | 1 ZBTB24          | K10503 |
| ENSG00000127334 | -0.570669 | 5.819972 | 0.388288 | 1 DYRK2           | K18669 |
| ENSG00000108984 | -0.581689 | 4.628978 | 0.388326 | 1 MAP2K6          | K04433 |
| ENSG00000085491 | -0.568674 | 6.902669 | 0.388431 | 1 SLC25A24        | K14684 |
| ENSG00000149218 | -0.582365 | 4.602209 | 0.388612 | 1 ENDOD1          | K15049 |
| ENSG00000231638 | -0.723561 | 1.43298  | 0.388873 | 1 AC011738.4      | -      |
| ENSG00000139117 | -0.571436 | 5.698033 | 0.388902 | 1 CPNE8           | -      |
| ENSG00000148344 | -0.574967 | 4.802043 | 0.389546 | 1 PTGES           | K15729 |
| ENSG00000170727 | -0.611077 | 3.010081 | 0.389575 | 1 BOP1            | K14824 |
| ENSG00000129007 | -0.602623 | 3.394503 | 0.38968  | 1 CALML4          | -      |
| ENSG00000224411 | -0.705105 | 1.329734 | 0.389778 | 1 RP11-1033A18.1  | K04079 |
| ENSG00000272316 | -0.705105 | 1.329734 | 0.389778 | 1 XXbac-BPGBPG55C | -      |
| ENSG00000108839 | 0.701237  | 1.242555 | 0.389778 | 1 ALOX12          | K00458 |
| ENSG00000255860 | -0.798255 | 1.186151 | 0.390757 | 1 RP11-807H22.6   | K13649 |
| ENSG00000124693 | 0.727061  | 1.106896 | 0.390757 | 1 HIST1H3B        | K11253 |
| ENSG00000013503 | -0.580816 | 4.251039 | 0.390891 | 1 POLR3B          | K03021 |
| ENSG00000176907 | -0.566366 | 6.603079 | 0.391013 | 1 C8orf4          | -      |
| ENSG00000197702 | -0.56756  | 6.4098   | 0.391415 | 1 PARVA           | K06275 |
| ENSG00000113441 | -0.57829  | 4.771945 | 0.39147  | 1 LNPEP           | K01257 |
| ENSG00000214194 | -0.569282 | 5.742835 | 0.391598 | 1 LINC00998       | -      |
| ENSG00000233276 | -0.563642 | 7.515144 | 0.39163  | 1 GPX1            | K00432 |
| ENSG00000184226 | -0.745299 | 1.038639 | 0.391806 | 1 PCDH9           | K16498 |
| ENSG00000128886 | 0.697965  | 0.98353  | 0.391806 | 1 ELL3            | K15183 |
| ENSG00000181350 | 0.697965  | 0.98353  | 0.391806 | 1 FAM211A         | -      |
| ENSG00000196313 | 0.697965  | 0.98353  | 0.391806 | 1 POM121          | K14316 |
| ENSG00000228232 | 0.697965  | 0.98353  | 0.391806 | 1 GAPDHP1         | K00134 |
| ENSG00000041353 | -0.571771 | 5.596815 | 0.391892 | 1 RAB27B          | K07886 |
| ENSG00000067533 | -0.571902 | 5.309724 | 0.391928 | 1 RRP15           | -      |
| ENSG00000106635 | 0.646598  | 2.203426 | 0.391947 | 1 BCL7B           | -      |
| ENSG00000204842 | 0.567812  | 5.51605  | 0.392016 | 1 ATXN2           | -      |
| ENSG00000175318 | 0.60279   | 3.177311 | 0.392054 | 1 GRAMD2          | -      |
| ENSG00000163644 | -0.621365 | 2.805938 | 0.392109 | 1 PPM1K           | K17505 |
| ENSG00000078269 | 0.57638   | 4.586959 | 0.392173 | 1 SYNJ2           | K01099 |
| ENSG00000135365 | 0.565007  | 6.522991 | 0.392256 | 1 PHF21A          | -      |
| ENSG00000136010 | -0.598718 | 3.494999 | 0.392344 | 1 ALDH1L2         | K00289 |
| ENSG00000090534 | 0.799257  | 0.790299 | 0.392904 | 1 THPO            | K06854 |

|                 |           |           |          |                 |        |
|-----------------|-----------|-----------|----------|-----------------|--------|
| ENSG00000205275 | 0.799257  | 0.790299  | 0.392904 | 1 CSPG4P9       | K08115 |
| ENSG00000213312 | 0.72944   | 0.820076  | 0.392904 | 1 RPL7AP34      | K02936 |
| ENSG00000217094 | -0.605297 | 3.139986  | 0.392996 | 1 PPIAP31       | K03767 |
| ENSG00000156697 | -0.564933 | 6.040701  | 0.393169 | 1 UTP14A        | K14567 |
| ENSG00000176623 | -0.568603 | 5.505396  | 0.393212 | 1 RMDN1         | K08142 |
| ENSG00000154914 | 0.570485  | 4.632005  | 0.393306 | 1 USP43         | K11856 |
| ENSG00000163291 | -0.591467 | 3.872128  | 0.393355 | 1 PAQR3         | K08854 |
| ENSG00000109107 | 0.565814  | 5.583619  | 0.393789 | 1 ALDOC         | K01623 |
| ENSG00000160991 | 0.85195   | 0.601643  | 0.393996 | 1 ORAI2         | K16057 |
| ENSG00000161912 | 0.85195   | 0.601643  | 0.393996 | 1 ADCY10P1      | K11265 |
| ENSG00000224596 | 0.85195   | 0.601643  | 0.393996 | 1 ZMIZ1-AS1     | -      |
| ENSG00000267283 | 0.85195   | 0.601643  | 0.393996 | 1 AC005306.3    | -      |
| ENSG00000122711 | 0.770273  | 0.635879  | 0.393996 | 1 SPINK4        | -      |
| ENSG00000144596 | 0.770273  | 0.635879  | 0.393996 | 1 GRIP2         | -      |
| ENSG00000167476 | 0.770273  | 0.635879  | 0.393996 | 1 JSRP1         | -      |
| ENSG00000271646 | 0.770273  | 0.635879  | 0.393996 | 1 RP11-326I11.3 | -      |
| ENSG00000008277 | -0.617187 | 2.667576  | 0.394019 | 1 ADAM22        | K16068 |
| ENSG00000204054 | 0.570763  | 4.991127  | 0.394029 | 1 LINC00963     | -      |
| ENSG00000104774 | 0.565509  | 5.719992  | 0.394266 | 1 MAN2B1        | K12311 |
| ENSG00000206573 | 0.586802  | 3.592301  | 0.394301 | 1 SETD5-AS1     | -      |
| ENSG00000068903 | 0.576887  | 4.555523  | 0.394462 | 1 SIRT2         | K11412 |
| ENSG00000153815 | 0.564829  | 5.703211  | 0.394542 | 1 CMIP          | -      |
| ENSG00000187244 | -0.579998 | 4.436272  | 0.394564 | 1 BCAM          | K06578 |
| ENSG00000056291 | -1.03357  | -0.033371 | 0.394643 | 1 NPFFR2        | K08375 |
| ENSG00000176826 | -1.03357  | -0.033371 | 0.394643 | 1 FKBP9L        | K09575 |
| ENSG00000213901 | -1.03357  | -0.033371 | 0.394643 | 1 SLC23A3       | K14612 |
| ENSG00000243896 | -1.03357  | -0.033371 | 0.394643 | 1 OR2A7         | K04257 |
| ENSG00000244513 | -1.03357  | -0.033371 | 0.394643 | 1 CTD-2013N24.2 | -      |
| ENSG00000255306 | -1.03357  | -0.033371 | 0.394643 | 1 RP5-901A4.1   | -      |
| ENSG00000266402 | -1.03357  | -0.033371 | 0.394643 | 1 SNORA76       | -      |
| ENSG00000122861 | -0.678102 | 2.03736   | 0.394662 | 1 PLAU          | K01348 |
| ENSG00000005483 | 0.567405  | 5.184873  | 0.394821 | 1 KMT2E         | K09189 |
| ENSG00000072501 | -0.846743 | 0.526095  | 0.394949 | 1 SMC1A         | K06636 |
| ENSG00000150636 | -0.846743 | 0.526095  | 0.394949 | 1 CCDC102B      | -      |
| ENSG00000177570 | -0.846743 | 0.526095  | 0.394949 | 1 SAMD12        | -      |
| ENSG00000116663 | 0.825392  | 0.424913  | 0.394949 | 1 FBXO6         | K10100 |
| ENSG00000198689 | 0.825392  | 0.424913  | 0.394949 | 1 SLC9A6        | K12041 |
| ENSG00000238271 | 0.825392  | 0.424913  | 0.394949 | 1 IFNWP19       | K05440 |
| ENSG00000261655 | 0.825392  | 0.424913  | 0.394949 | 1 CTD-3064M3.3  | -      |
| ENSG00000141837 | -0.79053  | 0.490468  | 0.394949 | 1 CACNA1A       | K04344 |
| ENSG00000213920 | -0.79053  | 0.490468  | 0.394949 | 1 MDP1          | K17619 |
| ENSG00000236751 | -0.79053  | 0.490468  | 0.394949 | 1 RP1-30G7.2    | -      |
| ENSG00000253106 | -0.79053  | 0.490468  | 0.394949 | 1 RP11-158K1.3  | -      |
| ENSG00000106799 | 0.557927  | 9.21575   | 0.395062 | 1 TGFBR1        | K04674 |
| ENSG00000249395 | -0.612371 | 2.982632  | 0.395175 | 1 CASC9         | -      |
| ENSG00000005175 | -0.562051 | 6.191373  | 0.395196 | 1 RPAP3         | K04135 |
| ENSG00000151292 | -0.565588 | 5.48893   | 0.395359 | 1 CSNK1G3       | K08958 |
| ENSG00000158623 | -1.019599 | 0.22316   | 0.395441 | 1 COPG2         | K17267 |
| ENSG00000231702 | -1.019599 | 0.22316   | 0.395441 | 1 RP11-54O7.10  | K02924 |
| ENSG00000235912 | -1.019599 | 0.22316   | 0.395441 | 1 RP1-159A19.3  | K07604 |
| ENSG00000236871 | -1.019599 | 0.22316   | 0.395441 | 1 LINC00106     | -      |
| ENSG00000271826 | -1.019599 | 0.22316   | 0.395441 | 1 RP1-93I3.1    | -      |
| ENSG00000011590 | 0.90396   | 0.178069  | 0.395441 | 1 ZBTB32        | K10506 |
| ENSG00000156042 | 0.90396   | 0.178069  | 0.395441 | 1 TTC18         | -      |
| ENSG00000187008 | 0.90396   | 0.178069  | 0.395441 | 1 PKD1L3        | -      |
| ENSG00000213713 | 0.616285  | 2.526585  | 0.395509 | 1 PIGCP1        | K03859 |
| ENSG00000138780 | -0.584697 | 3.74065   | 0.39556  | 1 GSTCD         | -      |
| ENSG00000082781 | -0.559258 | 7.276187  | 0.395644 | 1 ITGB5         | K06588 |

|                 |           |          |          |                 |        |
|-----------------|-----------|----------|----------|-----------------|--------|
| ENSG00000141642 | -0.645169 | 1.958722 | 0.395739 | 1 ELAC1         | K00784 |
| ENSG00000197461 | -0.573323 | 4.596748 | 0.395765 | 1 PDGFA         | K04359 |
| ENSG00000074755 | 0.568029  | 5.121876 | 0.395804 | 1 ZZEF1         | K17985 |
| ENSG00000185453 | 0.591813  | 3.229944 | 0.395907 | 1 C19orf68      | -      |
| ENSG00000176978 | -0.56179  | 6.215122 | 0.39597  | 1 DPP7          | K01276 |
| ENSG00000011143 | -0.585614 | 3.898721 | 0.39599  | 1 MKS1          | K19332 |
| ENSG00000165416 | -0.561212 | 6.175727 | 0.396045 | 1 SUGT1         | K12795 |
| ENSG00000158411 | -0.56645  | 5.542475 | 0.396372 | 1 MITD1         | -      |
| ENSG00000145242 | -0.591776 | 3.69414  | 0.396374 | 1 EPHA5         | K05106 |
| ENSG00000145604 | -0.558615 | 6.999898 | 0.396653 | 1 SKP2          | K03875 |
| ENSG00000157259 | -0.565544 | 5.076796 | 0.396717 | 1 GATAD1        | K17985 |
| ENSG00000115904 | 0.560617  | 6.017426 | 0.396783 | 1 SOS1          | K03099 |
| ENSG00000151881 | -0.562408 | 5.618352 | 0.396871 | 1 C5orf28       | -      |
| ENSG00000065485 | 0.559104  | 6.219747 | 0.397007 | 1 PDIA5         | K09583 |
| ENSG00000125845 | 0.557012  | 7.476454 | 0.397038 | 1 BMP2          | K04662 |
| ENSG00000159882 | -0.643367 | 2.452533 | 0.397217 | 1 ZNF230        | K09228 |
| ENSG00000088451 | -0.572981 | 4.614718 | 0.397236 | 1 TGDS          | K01710 |
| ENSG00000123472 | -0.56064  | 5.908583 | 0.397375 | 1 ATPAF1        | K07555 |
| ENSG00000132313 | -0.562658 | 5.722273 | 0.397582 | 1 MRPL35        | K02916 |
| ENSG00000145623 | 0.555086  | 8.443555 | 0.397825 | 1 OSMR          | K08267 |
| ENSG00000106538 | 0.637023  | 2.356767 | 0.398169 | 1 RARRES2       | K10044 |
| ENSG00000156968 | -0.632244 | 2.403142 | 0.398169 | 1 MPV17L        | K13349 |
| ENSG00000094841 | -0.618054 | 2.394324 | 0.398169 | 1 UPRT          | K00761 |
| ENSG00000099942 | 0.555192  | 7.588511 | 0.398447 | 1 CRKL          | K04438 |
| ENSG00000168077 | -0.560922 | 5.617462 | 0.398662 | 1 SCARA3        | -      |
| ENSG00000113140 | -0.598773 | 3.08407  | 0.398854 | 1 SPARC         | -      |
| ENSG00000164211 | -0.558877 | 5.677675 | 0.399254 | 1 STARD4        | -      |
| ENSG00000236618 | -0.602593 | 2.728059 | 0.399458 | 1 PITPNA-AS1    | -      |
| ENSG00000139211 | -0.567177 | 4.376342 | 0.399704 | 1 AMIGO2        | -      |
| ENSG00000152359 | -0.586575 | 3.673624 | 0.399976 | 1 POC5          | K16483 |
| ENSG00000152413 | -0.586575 | 3.673624 | 0.399976 | 1 HOMER1        | K15010 |
| ENSG00000225151 | 0.599499  | 2.969045 | 0.400249 | 1 GOLGA2P7      | -      |
| ENSG00000141551 | 0.552979  | 7.608689 | 0.400299 | 1 CSNK1D        | K08959 |
| ENSG00000172828 | -0.59351  | 3.231266 | 0.40078  | 1 CES3          | K15743 |
| ENSG00000163006 | -0.566997 | 4.611112 | 0.400825 | 1 CCDC138       | -      |
| ENSG00000158106 | -0.562127 | 5.353176 | 0.400871 | 1 RHPN1         | -      |
| ENSG00000099849 | -0.562139 | 5.181769 | 0.400927 | 1 RASSF7        | K09855 |
| ENSG00000168564 | 0.553849  | 6.521041 | 0.40124  | 1 CDKN2AIP      | -      |
| ENSG00000100997 | 0.556514  | 5.926369 | 0.40126  | 1 ABHD12        | K13704 |
| ENSG00000257815 | 0.67379   | 1.526115 | 0.401305 | 1 RP11-611E13.2 | -      |
| ENSG00000104140 | 0.552028  | 7.407144 | 0.401341 | 1 RHOV          | K07866 |
| ENSG00000115380 | -0.551011 | 8.471113 | 0.401367 | 1 EFEMP1        | K18262 |
| ENSG00000104312 | -0.556883 | 5.920916 | 0.40147  | 1 RIPK2         | K08846 |
| ENSG00000204946 | -0.580955 | 3.402435 | 0.401746 | 1 ZNF783        | K09228 |
| ENSG00000196850 | 0.554025  | 5.996906 | 0.401895 | 1 PPTC7         | K17508 |
| ENSG00000159921 | -0.559975 | 5.389113 | 0.402234 | 1 GNE           | K12409 |
| ENSG00000198807 | -0.608557 | 2.589201 | 0.40226  | 1 PAX9          | K09382 |
| ENSG00000185115 | -0.57605  | 3.877916 | 0.40228  | 1 NDNL2         | -      |
| ENSG00000105866 | -0.596568 | 2.884664 | 0.402637 | 1 SP4           | K09194 |
| ENSG00000006016 | 0.560203  | 5.086099 | 0.402763 | 1 CRLF1         | -      |
| ENSG00000163521 | -0.651356 | 2.129855 | 0.402827 | 1 GLB1L         | K11447 |
| ENSG00000226049 | 0.649266  | 1.434174 | 0.403125 | 1 TLK2P1        | K08864 |
| ENSG00000106785 | -0.557443 | 5.484051 | 0.403225 | 1 TRIM14        | K12004 |
| ENSG00000107798 | -0.55198  | 6.426216 | 0.403314 | 1 LIPA          | K01052 |
| ENSG00000181035 | 0.609649  | 2.503833 | 0.403327 | 1 SLC25A42      | K15085 |
| ENSG00000114023 | 0.552818  | 6.269594 | 0.403481 | 1 FAM162A       | -      |
| ENSG00000170448 | -0.564577 | 4.563778 | 0.40361  | 1 NFXL1         | K15683 |
| ENSG00000235043 | 0.58358   | 3.066893 | 0.403614 | 1 TECRP1        | K10258 |



|                 |           |          |          |                 |        |
|-----------------|-----------|----------|----------|-----------------|--------|
| ENSG00000147601 | -0.552371 | 5.843803 | 0.403863 | 1 TERF1         | K11110 |
| ENSG00000074582 | -0.562541 | 4.46617  | 0.403928 | 1 BCS1L         | K08900 |
| ENSG00000177000 | 0.563942  | 4.155396 | 0.404024 | 1 MTHFR         | K00297 |
| ENSG00000140750 | 0.56223   | 4.836649 | 0.404059 | 1 ARHGAP17      | -      |
| ENSG00000033178 | -0.554961 | 5.613896 | 0.40408  | 1 UBA6          | K10699 |
| ENSG00000213762 | 0.575652  | 3.621311 | 0.404213 | 1 ZNF134        | -      |
| ENSG00000163617 | 0.622201  | 2.01207  | 0.404264 | 1 KIAA1407      | -      |
| ENSG00000196878 | 0.54777   | 7.800732 | 0.404534 | 1 LAMB3         | K06244 |
| ENSG00000211584 | -0.557315 | 5.011814 | 0.404629 | 1 SLC48A1       | K15380 |
| ENSG00000184508 | -0.584963 | 3.249648 | 0.405065 | 1 HDDC3         | K01139 |
| ENSG00000244300 | 0.560377  | 4.908672 | 0.405387 | 1 RP11-475N22.4 | -      |
| ENSG00000142627 | -0.548771 | 6.741211 | 0.405517 | 1 EPHA2         | K05103 |
| ENSG00000044459 | -0.576369 | 3.862953 | 0.40553  | 1 CNTLN         | K16467 |
| ENSG00000186352 | 0.631861  | 1.933823 | 0.405843 | 1 ANKRD37       | -      |
| ENSG00000198805 | -0.548131 | 6.709797 | 0.406133 | 1 PNP           | K03783 |
| ENSG00000047578 | 0.580176  | 3.355556 | 0.406252 | 1 KIAA0556      | -      |
| ENSG00000116604 | 0.550308  | 5.979585 | 0.406422 | 1 MEF2D         | K09262 |
| ENSG00000100592 | -0.56803  | 4.056832 | 0.406511 | 1 DAAM1         | K04512 |
| ENSG00000059588 | -0.549625 | 5.920206 | 0.406559 | 1 TARBP1        | -      |
| ENSG00000139269 | -0.586977 | 3.178854 | 0.406612 | 1 INHBE         | K04667 |
| ENSG00000078177 | -0.594503 | 2.942823 | 0.407071 | 1 N4BP2         | K15720 |
| ENSG00000140287 | 0.739816  | 1.16498  | 0.407523 | 1 HDC           | K01590 |
| ENSG00000175106 | -0.716568 | 1.23914  | 0.407523 | 1 TVP23C        | K17985 |
| ENSG00000178852 | -0.716568 | 1.23914  | 0.407523 | 1 EFCAB13       | -      |
| ENSG00000197191 | -0.716568 | 1.23914  | 0.407523 | 1 C9orf169      | -      |
| ENSG00000258048 | -0.716568 | 1.23914  | 0.407523 | 1 RP11-530C5.1  | -      |
| ENSG00000246859 | 0.687668  | 1.187541 | 0.407523 | 1 STARD4-AS1    | -      |
| ENSG00000260418 | 0.687668  | 1.187541 | 0.407523 | 1 RP3-406A7.7   | -      |
| ENSG00000187642 | -0.669629 | 1.91366  | 0.407585 | 1 C1orf170      | -      |
| ENSG00000158715 | -0.605425 | 2.660307 | 0.407672 | 1 SLC45A3       | K15379 |
| ENSG00000163050 | 0.550148  | 5.743146 | 0.407724 | 1 ADCK3         | -      |
| ENSG00000101680 | 0.545855  | 6.632452 | 0.407884 | 1 LAMA1         | K05637 |
| ENSG00000156958 | -0.566    | 4.194667 | 0.408103 | 1 GALK2         | K18674 |
| ENSG00000101187 | 0.543873  | 7.390956 | 0.408322 | 1 SLCO4A1       | K14354 |
| ENSG00000048405 | -0.561275 | 4.580317 | 0.40875  | 1 ZNF800        | -      |
| ENSG00000165832 | -0.551722 | 5.252323 | 0.408769 | 1 TRUB1         | K03177 |
| ENSG00000148175 | 0.541813  | 8.477429 | 0.409125 | 1 STOM          | K17286 |
| ENSG00000128274 | 0.553265  | 4.984245 | 0.409164 | 1 A4GALT        | K01988 |
| ENSG00000118898 | 0.543369  | 7.043425 | 0.409251 | 1 PPL           | K10386 |
| ENSG00000150455 | -0.632904 | 1.827549 | 0.409516 | 1 TIRAP         | K05403 |
| ENSG00000235173 | -0.632904 | 1.827549 | 0.409516 | 1 FAM203A       | -      |
| ENSG00000081913 | 0.567337  | 3.908544 | 0.409952 | 1 PHLPP1        | K16340 |
| ENSG00000237412 | 0.540318  | 9.531444 | 0.409965 | 1 PRSS56        | -      |
| ENSG00000115652 | -0.547992 | 5.154981 | 0.410102 | 1 UXS1          | K08678 |
| ENSG00000166275 | -0.566891 | 3.393878 | 0.410106 | 1 C10orf32      | -      |
| ENSG00000174137 | 0.713165  | 1.046477 | 0.410207 | 1 FAM53A        | -      |
| ENSG00000132763 | -0.565591 | 3.901427 | 0.410501 | 1 MMACHC        | -      |
| ENSG00000173812 | -0.540054 | 8.845609 | 0.410525 | 1 EIF1          | K03113 |
| ENSG00000086300 | -0.561093 | 4.27369  | 0.410689 | 1 SNX10         | K17924 |
| ENSG00000101247 | -0.569096 | 3.98954  | 0.410953 | 1 NDUFAF5       | K18162 |
| ENSG00000185128 | 0.586317  | 3.167934 | 0.411037 | 1 TBC1D3F       | K11837 |
| ENSG00000134830 | 0.570351  | 3.471093 | 0.411516 | 1 C5AR2         | K04171 |
| ENSG00000054179 | 0.668892  | 1.669927 | 0.411671 | 1 ENTPD2        | K01509 |
| ENSG00000164330 | 0.633416  | 1.685423 | 0.411671 | 1 EBF1          | K09103 |
| ENSG00000088727 | -0.614116 | 2.1583   | 0.411745 | 1 KIF9          | K10397 |
| ENSG00000141519 | -0.614116 | 2.1583   | 0.411745 | 1 CCDC40        | -      |
| ENSG00000160781 | -0.614116 | 2.1583   | 0.411745 | 1 PAQR6         | -      |
| ENSG00000124787 | -0.553235 | 4.313798 | 0.411886 | 1 RPP40         | K14530 |

|                 |           |          |          |                |        |
|-----------------|-----------|----------|----------|----------------|--------|
| ENSG00000151532 | -0.556457 | 4.380477 | 0.412167 | 1 VTI1A        | K08493 |
| ENSG00000137168 | -0.545986 | 5.761527 | 0.412262 | 1 PPIL1        | K12733 |
| ENSG00000080822 | -0.550464 | 5.014508 | 0.412706 | 1 CLDND1       | -      |
| ENSG00000090857 | 0.561726  | 3.890949 | 0.413198 | 1 PDPR         | K17509 |
| ENSG00000163520 | 0.538698  | 7.029338 | 0.413296 | 1 FBLN2        | K17307 |
| ENSG00000149527 | 0.744925  | 0.890209 | 0.413309 | 1 PLCH2        | K19006 |
| ENSG00000183072 | 0.744925  | 0.890209 | 0.413309 | 1 NKX2-5       | K09345 |
| ENSG00000218422 | 0.744925  | 0.890209 | 0.413309 | 1 AC016773.1   | K14283 |
| ENSG00000173227 | 0.540551  | 5.908156 | 0.413337 | 1 SYT12        | -      |
| ENSG00000184863 | 0.541924  | 5.856739 | 0.413334 | 1 RBM33        | -      |
| ENSG00000170946 | -0.584335 | 3.272493 | 0.413482 | 1 DNAJC24      | K17867 |
| ENSG00000143458 | -0.576647 | 3.267802 | 0.413482 | 1 GABPB2       | K09454 |
| ENSG00000196312 | 0.631259  | 2.043778 | 0.413612 | 1 HIATL2       | -      |
| ENSG00000120658 | -0.56917  | 3.663047 | 0.413857 | 1 ENOX1        | -      |
| ENSG00000227764 | 0.684924  | 1.570052 | 0.414088 | 1 RP11-354K1.1 | -      |
| ENSG00000041515 | 0.646622  | 1.586746 | 0.414088 | 1 MYO16        | K17481 |
| ENSG00000109917 | -0.544134 | 5.337018 | 0.414273 | 1 ZNF259       | K06874 |
| ENSG00000141179 | -0.558517 | 3.528916 | 0.414278 | 1 PCTP         | K09228 |
| ENSG00000143624 | 0.55051   | 4.048057 | 0.414295 | 1 INTS3        | K13140 |
| ENSG00000077232 | -0.537616 | 7.113961 | 0.414363 | 1 DNAJC10      | K09530 |
| ENSG00000160712 | 0.552184  | 4.42672  | 0.414706 | 1 IL6R         | K05055 |
| ENSG00000111726 | -0.539583 | 5.836183 | 0.414849 | 1 CMAS         | K00983 |
| ENSG00000184887 | -0.581863 | 3.047032 | 0.41505  | 1 BTBD6        | K10478 |
| ENSG00000171793 | -0.536227 | 7.351884 | 0.415188 | 1 CTPS1        | K01937 |
| ENSG00000088826 | 0.551264  | 4.474956 | 0.415266 | 1 SMOX         | K12259 |
| ENSG00000164603 | -0.606951 | 2.625194 | 0.415387 | 1 C7orf60      | -      |
| ENSG00000213066 | -0.556916 | 3.723807 | 0.415539 | 1 FGFR10P      | K16546 |
| ENSG00000100266 | 0.535953  | 6.890598 | 0.415908 | 1 PACSIN2      | -      |
| ENSG00000087266 | 0.54126   | 5.63051  | 0.415998 | 1 SH3BP2       | K07984 |
| ENSG00000159082 | 0.551834  | 4.074364 | 0.416133 | 1 SYNJ1        | K01099 |
| ENSG00000101004 | -0.578764 | 3.173836 | 0.416437 | 1 NINL         | K16477 |
| ENSG00000173482 | -0.543912 | 5.182947 | 0.416628 | 1 PTPRM        | K05693 |
| ENSG00000115464 | 0.53818   | 5.919092 | 0.416703 | 1 USP34        | K11853 |
| ENSG00000123545 | -0.54994  | 4.148378 | 0.416783 | 1 NDUFAF4      | K18161 |
| ENSG00000100033 | 0.661929  | 1.480849 | 0.416821 | 1 PRODH        | K00318 |
| ENSG00000267040 | 0.661929  | 1.480849 | 0.416821 | 1 RP11-35G9.3  | -      |
| ENSG00000115325 | -0.553706 | 4.222968 | 0.416853 | 1 DOK1         | K14752 |
| ENSG00000117010 | -0.596085 | 2.581503 | 0.416911 | 1 ZNF684       | K09228 |
| ENSG00000091831 | -0.740143 | 0.776389 | 0.416921 | 1 ESR1         | -      |
| ENSG00000219891 | -0.740143 | 0.776389 | 0.416921 | 1 ZSCAN12P1    | K09229 |
| ENSG00000161547 | -0.53324  | 7.86502  | 0.417152 | 1 SRSF2        | K12891 |
| ENSG00000089902 | 0.535428  | 6.157612 | 0.417193 | 1 RCOR1        | K11829 |
| ENSG00000176912 | 0.584599  | 2.752339 | 0.417195 | 1 C18orf56     | K00560 |
| ENSG00000187653 | -0.543347 | 4.852786 | 0.417651 | 1 TMSB4XP8     | K05764 |
| ENSG00000111640 | 0.530814  | 12.45609 | 0.417845 | 1 GAPDH        | K00134 |
| ENSG00000188042 | -0.625585 | 1.94649  | 0.41793  | 1 ARL4C        | K07945 |
| ENSG00000166016 | 0.545484  | 4.785032 | 0.417996 | 1 ABTB2        | K10521 |
| ENSG00000172965 | -0.537735 | 5.477191 | 0.418258 | 1 MIR4435-1HG  | -      |
| ENSG00000272565 | -0.569749 | 3.628061 | 0.41859  | 1 RP11-485G4.2 | -      |
| ENSG00000163482 | -0.559808 | 3.389578 | 0.418628 | 1 STK36        | K06228 |
| ENSG00000127419 | 0.564313  | 3.225831 | 0.418644 | 1 TMEM175      | -      |
| ENSG00000103876 | -0.540852 | 4.866343 | 0.418695 | 1 FAH          | K01555 |
| ENSG00000173517 | 0.553121  | 4.143112 | 0.41905  | 1 PEAK1        | K17538 |
| ENSG00000198796 | -0.543257 | 4.806624 | 0.419081 | 1 ALPK2        | K08868 |
| ENSG00000110172 | -0.53229  | 6.992811 | 0.4192   | 1 CHORDC1      | K16729 |
| ENSG00000129480 | -0.550653 | 3.907105 | 0.419207 | 1 DTD2         | K17985 |
| ENSG00000125726 | 0.535257  | 6.095319 | 0.419228 | 1 CD70         | K05470 |
| ENSG00000246705 | 0.538434  | 5.329672 | 0.419783 | 1 H2AFJ        | K11251 |

|                 |           |          |          |                 |        |
|-----------------|-----------|----------|----------|-----------------|--------|
| ENSG00000196954 | -0.538322 | 5.267155 | 0.419866 | 1 CASP4         | K04394 |
| ENSG00000241627 | -0.695087 | 1.414924 | 0.419933 | 1 UBQLN4P1      | K04523 |
| ENSG00000228506 | 0.679882  | 1.366596 | 0.419933 | 1 RP11-98I9.4   | -      |
| ENSG00000138134 | -0.541038 | 4.917916 | 0.420017 | 1 STAMBPL1      | -      |
| ENSG00000107672 | -0.537044 | 5.621034 | 0.420097 | 1 NSMCE4A       | -      |
| ENSG00000023516 | -0.545889 | 4.823732 | 0.420144 | 1 AKAP11        | K16527 |
| ENSG00000120458 | -0.603974 | 2.694582 | 0.420144 | 1 MSANTD2       | -      |
| ENSG00000164430 | -0.537342 | 5.669118 | 0.42023  | 1 MB21D1        | K17834 |
| ENSG00000255103 | 0.588421  | 2.4334   | 0.420304 | 1 KIAA0754      | K09228 |
| ENSG00000205047 | 0.605723  | 2.1569   | 0.420439 | 1 FLJ00104      | K17985 |
| ENSG00000135213 | 0.63257   | 1.814899 | 0.420445 | 1 POM121C       | K14316 |
| ENSG00000255248 | 0.63257   | 1.814899 | 0.420445 | 1 RP11-166D19.1 | -      |
| ENSG00000198157 | -0.54579  | 4.253059 | 0.420582 | 1 HMGN5         | K17045 |
| ENSG00000116273 | 0.536238  | 5.367434 | 0.420722 | 1 PHF13         | -      |
| ENSG00000169100 | 0.527506  | 9.135598 | 0.421228 | 1 SLC25A6       | K05863 |
| ENSG00000182287 | -0.542387 | 4.42385  | 0.421255 | 1 AP1S2         | K12394 |
| ENSG00000135924 | 0.539834  | 4.583492 | 0.421338 | 1 DNAJB2        | K09508 |
| ENSG00000162623 | -0.531025 | 6.453991 | 0.421412 | 1 TYW3          | K15450 |
| ENSG00000143952 | -0.532439 | 5.891778 | 0.421465 | 1 VPS54         | K17600 |
| ENSG00000267673 | -0.581612 | 2.645647 | 0.421769 | 1 FDX1L         | -      |
| ENSG00000134987 | -0.534253 | 5.960834 | 0.421961 | 1 WDR36         | K14554 |
| ENSG00000185839 | -0.570936 | 3.144226 | 0.422031 | 1 RP4-592A1.2   | K00939 |
| ENSG00000113645 | 0.528462  | 7.012709 | 0.422222 | 1 WWC1          | K16685 |
| ENSG00000164815 | -0.537071 | 5.053209 | 0.42229  | 1 ORC5          | K02607 |
| ENSG00000198369 | -0.540062 | 4.665451 | 0.422382 | 1 SPRED2        | K04703 |
| ENSG00000244041 | 0.580411  | 2.958281 | 0.422429 | 1 LINC01011     | -      |
| ENSG00000181649 | -0.529704 | 6.410426 | 0.422477 | 1 PHLDA2        | -      |
| ENSG00000198814 | -0.634113 | 2.119077 | 0.422712 | 1 GK            | K00864 |
| ENSG00000271335 | 0.585323  | 2.56511  | 0.423507 | 1 RP11-324I22.4 | -      |
| ENSG00000105963 | -0.642597 | 1.290401 | 0.42351  | 1 ADAP1         | -      |
| ENSG00000177855 | -0.642597 | 1.290401 | 0.42351  | 1 CACYBPP2      | K04507 |
| ENSG00000114544 | -0.558035 | 3.584736 | 0.423621 | 1 SLC41A3       | K15122 |
| ENSG00000172273 | 0.539038  | 4.404154 | 0.42365  | 1 HINFP         | K04613 |
| ENSG00000151576 | -0.533604 | 5.158637 | 0.423709 | 1 QTRTD1        | K15407 |
| ENSG00000076864 | 0.553021  | 3.757759 | 0.423715 | 1 RAPIGAP       | K17700 |
| ENSG00000021826 | 0.524167  | 10.05511 | 0.423902 | 1 CPS1          | K01948 |
| ENSG00000182240 | 0.52462   | 8.666107 | 0.423971 | 1 BACE2         | K07747 |
| ENSG00000250588 | -0.553456 | 3.230471 | 0.423982 | 1 IQCJ-SCHIP1   | -      |
| ENSG00000261116 | -0.559039 | 3.470843 | 0.424065 | 1 RP3-523K23.2  | -      |
| ENSG00000177054 | -0.555989 | 3.850623 | 0.424143 | 1 ZDHHC13       | K18932 |
| ENSG00000116127 | -0.550849 | 3.847523 | 0.424143 | 1 ALMS1         | K16741 |
| ENSG00000013364 | 0.526347  | 6.540446 | 0.424171 | 1 MVP           | K17266 |
| ENSG00000188910 | -0.538837 | 4.401221 | 0.424187 | 1 GJB3          | K07622 |
| ENSG00000204406 | -0.605539 | 2.342804 | 0.424256 | 1 MBD5          | -      |
| ENSG00000214145 | 0.600197  | 2.314832 | 0.424256 | 1 LINC00887     | -      |
| ENSG00000222041 | -0.540405 | 4.749195 | 0.424408 | 1 LINC00152     | -      |
| ENSG00000111540 | 0.539382  | 4.439013 | 0.424451 | 1 RAB5B         | K07888 |
| ENSG00000076242 | -0.534261 | 5.236142 | 0.424497 | 1 MLH1          | K08734 |
| ENSG00000163399 | 0.522851  | 10.01411 | 0.425069 | 1 ATP1A1        | K01539 |
| ENSG00000146223 | -0.524449 | 7.535753 | 0.425215 | 1 RPL7L1        | K17985 |
| ENSG00000136122 | -0.532416 | 5.24655  | 0.425254 | 1 BORA          | K16831 |
| ENSG00000117461 | 0.536112  | 4.412452 | 0.425527 | 1 PIK3R3        | K02649 |
| ENSG00000169093 | 0.526367  | 6.135875 | 0.425572 | 1 ASMTL         | K05066 |
| ENSG00000155115 | -0.528567 | 5.771191 | 0.425875 | 1 GTF3C6        | K15203 |
| ENSG00000109066 | 0.545105  | 4.220649 | 0.426009 | 1 TMEM104       | K17985 |
| ENSG00000035687 | -0.525267 | 6.400116 | 0.426021 | 1 ADSS          | K01939 |
| ENSG00000172476 | -0.89069  | 0.362879 | 0.426125 | 1 RAB40A        | K07928 |
| ENSG00000188996 | -0.89069  | 0.362879 | 0.426125 | 1 HUS1B         | K10996 |

|                 |           |           |          |                  |        |
|-----------------|-----------|-----------|----------|------------------|--------|
| ENSG00000227124 | -0.89069  | 0.362879  | 0.426125 | 1 ZNF717         | K09228 |
| ENSG00000237350 | -0.89069  | 0.362879  | 0.426125 | 1 CDC42P6        | K04393 |
| ENSG00000272947 | -0.89069  | 0.362879  | 0.426125 | 1 RP11-71H17.9   | -      |
| ENSG00000007952 | -0.827036 | 0.322603  | 0.426125 | 1 NOX1           | K08008 |
| ENSG00000104723 | -0.827036 | 0.322603  | 0.426125 | 1 TUSC3          | K12669 |
| ENSG00000116885 | -0.827036 | 0.322603  | 0.426125 | 1 OSCP1          | -      |
| ENSG00000123977 | -0.827036 | 0.322603  | 0.426125 | 1 DAW1           | K19760 |
| ENSG00000133710 | -0.827036 | 0.322603  | 0.426125 | 1 SPINK5         | -      |
| ENSG00000155959 | -0.827036 | 0.322603  | 0.426125 | 1 VBPI           | -      |
| ENSG00000196648 | -0.827036 | 0.322603  | 0.426125 | 1 GOLGA6L20      | -      |
| ENSG00000227946 | -0.827036 | 0.322603  | 0.426125 | 1 AC007383.3     | -      |
| ENSG00000268798 | -0.827036 | 0.322603  | 0.426125 | 1 AC027307.3     | K01368 |
| ENSG00000163319 | -0.531795 | 5.372297  | 0.426139 | 1 MRPS18C        | K02963 |
| ENSG00000138794 | -0.559607 | 3.410329  | 0.426189 | 1 CASP6          | K04396 |
| ENSG00000164506 | -0.559607 | 3.410329  | 0.426189 | 1 STXBP5         | K08518 |
| ENSG00000129514 | -0.550517 | 3.950229  | 0.426378 | 1 FOXA1          | K09387 |
| ENSG00000149547 | -0.524372 | 6.508369  | 0.426459 | 1 EI24           | K10134 |
| ENSG00000175137 | 0.53649   | 4.810352  | 0.426642 | 1 SH3BP5L        | -      |
| ENSG00000068079 | -0.532893 | 5.297505  | 0.426832 | 1 IFI35          | -      |
| ENSG00000069509 | -0.535099 | 4.770174  | 0.426937 | 1 FUNDC1         | K17986 |
| ENSG00000099377 | 0.527306  | 5.596382  | 0.427281 | 1 HSD3B7         | K12408 |
| ENSG00000164934 | -0.523393 | 6.817371  | 0.427335 | 1 DCAF13         | K11806 |
| ENSG00000196950 | 0.523478  | 6.620359  | 0.427337 | 1 SLC39A10       | K14716 |
| ENSG00000126391 | 0.527175  | 5.660361  | 0.427489 | 1 FRMD8          | -      |
| ENSG00000213185 | -0.729816 | 1.142407  | 0.427663 | 1 FAM24B         | -      |
| ENSG00000197381 | 0.521314  | 7.352089  | 0.428007 | 1 ADARB1         | K13194 |
| ENSG00000108465 | -0.522687 | 6.551925  | 0.428183 | 1 CDK5RAP3       | -      |
| ENSG00000112812 | -0.557448 | 3.65595   | 0.428188 | 1 PRSS16         | K09649 |
| ENSG00000124193 | -0.520856 | 7.340124  | 0.428648 | 1 SRSF6          | K12893 |
| ENSG00000133935 | -0.526659 | 5.248847  | 0.428747 | 1 C14orf1        | K11504 |
| ENSG00000131944 | -0.611748 | 2.206698  | 0.428915 | 1 C19orf40       | K10898 |
| ENSG00000172270 | 0.5184    | 10.47282  | 0.42892  | 1 BSG            | K06535 |
| ENSG00000125375 | -0.574445 | 2.959354  | 0.428925 | 1 ATP5S          | K07554 |
| ENSG00000176055 | -0.545625 | 3.631249  | 0.429177 | 1 MBLAC2         | K14026 |
| ENSG00000053371 | -0.529682 | 5.174469  | 0.429306 | 1 AKR7A2         | K15303 |
| ENSG00000112234 | -0.539235 | 4.481783  | 0.429344 | 1 FBXL4          | K10270 |
| ENSG00000180448 | 0.529307  | 5.003618  | 0.429381 | 1 HMHA1          | -      |
| ENSG00000138778 | -0.526067 | 5.465354  | 0.429817 | 1 CENPE          | K11498 |
| ENSG00000269728 | -0.535487 | 4.419722  | 0.429839 | 1 RP11-145M9.4   | -      |
| ENSG00000267809 | -0.6525   | 1.555135  | 0.429983 | 1 NDUFV2P1       | K03943 |
| ENSG00000063660 | 0.519796  | 6.803087  | 0.430216 | 1 GPC1           | K08107 |
| ENSG00000137171 | -0.534579 | 4.302612  | 0.430312 | 1 KLC4           | K10407 |
| ENSG00000141527 | 0.526568  | 5.230137  | 0.430481 | 1 CARD14         | -      |
| ENSG00000144283 | -0.525621 | 5.653565  | 0.430627 | 1 PKP4           | K19720 |
| ENSG00000060566 | 2.438432  | -1.595162 | 0.430642 | 1 CREB3L3        | K09048 |
| ENSG00000063015 | 2.438432  | -1.595162 | 0.430642 | 1 SEZ6           | -      |
| ENSG00000077092 | 2.438432  | -1.595162 | 0.430642 | 1 RARB           | K08528 |
| ENSG00000086991 | 2.438432  | -1.595162 | 0.430642 | 1 NOX4           | -      |
| ENSG00000087085 | 2.438432  | -1.595162 | 0.430642 | 1 ACHE           | K01049 |
| ENSG00000087116 | 2.438432  | -1.595162 | 0.430642 | 1 ADAMTS2        | K08618 |
| ENSG00000091656 | 2.438432  | -1.595162 | 0.430642 | 1 ZFHX4          | K09380 |
| ENSG00000103316 | 2.438432  | -1.595162 | 0.430642 | 1 CRYM           | K18258 |
| ENSG00000106069 | 2.438432  | -1.595162 | 0.430642 | 1 CHN2           | K05062 |
| ENSG00000108825 | 2.438432  | -1.595162 | 0.430642 | 1 PTGES3L-AARSD1 | K07050 |
| ENSG00000111732 | 2.438432  | -1.595162 | 0.430642 | 1 AICDA          | K10989 |
| ENSG00000113073 | 2.438432  | -1.595162 | 0.430642 | 1 SLC4A9         | K13860 |
| ENSG00000124232 | 2.438432  | -1.595162 | 0.430642 | 1 RBPJL          | K06053 |
| ENSG00000129194 | 2.438432  | -1.595162 | 0.430642 | 1 SOX15          | K09271 |

|                 |          |           |          |                 |        |
|-----------------|----------|-----------|----------|-----------------|--------|
| ENSG00000130826 | 2.438432 | -1.595162 | 0.430642 | 1 DKC1          | K11131 |
| ENSG00000130876 | 2.438432 | -1.595162 | 0.430642 | 1 SLC7A10       | K13782 |
| ENSG00000133246 | 2.438432 | -1.595162 | 0.430642 | 1 PRAM1         | -      |
| ENSG00000140285 | 2.438432 | -1.595162 | 0.430642 | 1 FGF7          | K04358 |
| ENSG00000155974 | 2.438432 | -1.595162 | 0.430642 | 1 GRIP1         | -      |
| ENSG00000159618 | 2.438432 | -1.595162 | 0.430642 | 1 GPR114        | K08459 |
| ENSG00000162267 | 2.438432 | -1.595162 | 0.430642 | 1 ITIH3         | -      |
| ENSG00000162618 | 2.438432 | -1.595162 | 0.430642 | 1 ELTD1         | K04595 |
| ENSG00000162944 | 2.438432 | -1.595162 | 0.430642 | 1 RFTN2         | -      |
| ENSG00000164675 | 2.438432 | -1.595162 | 0.430642 | 1 IQUB          | -      |
| ENSG00000165092 | 2.438432 | -1.595162 | 0.430642 | 1 ALDH1A1       | K07249 |
| ENSG00000169314 | 2.438432 | -1.595162 | 0.430642 | 1 C22orf15      | -      |
| ENSG00000172247 | 2.438432 | -1.595162 | 0.430642 | 1 C1QTNF4       | K19470 |
| ENSG00000177335 | 2.438432 | -1.595162 | 0.430642 | 1 C8orf31       | -      |
| ENSG00000184357 | 2.438432 | -1.595162 | 0.430642 | 1 HIST1H1B      | K11275 |
| ENSG00000184434 | 2.438432 | -1.595162 | 0.430642 | 1 LRRC19        | -      |
| ENSG00000185829 | 2.438432 | -1.595162 | 0.430642 | 1 ARL17A        | K06883 |
| ENSG00000188199 | 2.438432 | -1.595162 | 0.430642 | 1 NUTM2B        | -      |
| ENSG00000188375 | 2.438432 | -1.595162 | 0.430642 | 1 H3F3C         | K11253 |
| ENSG00000197140 | 2.438432 | -1.595162 | 0.430642 | 1 ADAM32        | K16070 |
| ENSG00000197445 | 2.438432 | -1.595162 | 0.430642 | 1 C16orf47      | -      |
| ENSG00000199038 | 2.438432 | -1.595162 | 0.430642 | 1 MIR210        | -      |
| ENSG00000204241 | 2.438432 | -1.595162 | 0.430642 | 1 RP11-713P17.3 | -      |
| ENSG00000207697 | 2.438432 | -1.595162 | 0.430642 | 1 MIR573        | -      |
| ENSG00000213057 | 2.438432 | -1.595162 | 0.430642 | 1 C1orf220      | K09228 |
| ENSG00000215187 | 2.438432 | -1.595162 | 0.430642 | 1 FAM166B       | -      |
| ENSG00000215838 | 2.438432 | -1.595162 | 0.430642 | 1 RP11-466F5.6  | K01672 |
| ENSG00000217181 | 2.438432 | -1.595162 | 0.430642 | 1 RP11-360O19.5 | K02889 |
| ENSG00000219410 | 2.438432 | -1.595162 | 0.430642 | 1 RP4-761J14.8  | -      |
| ENSG00000222489 | 2.438432 | -1.595162 | 0.430642 | 1 SNORA79       | -      |
| ENSG00000224505 | 2.438432 | -1.595162 | 0.430642 | 1 AC002117.1    | -      |
| ENSG00000225953 | 2.438432 | -1.595162 | 0.430642 | 1 SATB2-AS1     | -      |
| ENSG00000226232 | 2.438432 | -1.595162 | 0.430642 | 1 RP11-419C5.2  | K01896 |
| ENSG00000226321 | 2.438432 | -1.595162 | 0.430642 | 1 AC104809.3    | -      |
| ENSG00000228261 | 2.438432 | -1.595162 | 0.430642 | 1 RP11-127L20.3 | -      |
| ENSG00000228915 | 2.438432 | -1.595162 | 0.430642 | 1 OR7E128P      | K04257 |
| ENSG00000229267 | 2.438432 | -1.595162 | 0.430642 | 1 AC072062.1    | -      |
| ENSG00000229587 | 2.438432 | -1.595162 | 0.430642 | 1 RP11-197P3.5  | -      |
| ENSG00000230432 | 2.438432 | -1.595162 | 0.430642 | 1 AC114803.3    | -      |
| ENSG00000231073 | 2.438432 | -1.595162 | 0.430642 | 1 RP11-316M1.3  | -      |
| ENSG00000231881 | 2.438432 | -1.595162 | 0.430642 | 1 RP5-1120P11.3 | -      |
| ENSG00000234268 | 2.438432 | -1.595162 | 0.430642 | 1 AP000936.1    | K02978 |
| ENSG00000234567 | 2.438432 | -1.595162 | 0.430642 | 1 RP1-283K11.2  | -      |
| ENSG00000235313 | 2.438432 | -1.595162 | 0.430642 | 1 HM13-IT1      | -      |
| ENSG00000235772 | 2.438432 | -1.595162 | 0.430642 | 1 AP001625.6    | -      |
| ENSG00000236754 | 2.438432 | -1.595162 | 0.430642 | 1 AC004019.13   | -      |
| ENSG00000237021 | 2.438432 | -1.595162 | 0.430642 | 1 RP3-486I3.7   | -      |
| ENSG00000237596 | 2.438432 | -1.595162 | 0.430642 | 1 RP13-143G15.4 | -      |
| ENSG00000237766 | 2.438432 | -1.595162 | 0.430642 | 1 GGTA2P        | K00743 |
| ENSG00000238868 | 2.438432 | -1.595162 | 0.430642 | 1 snoU13        | -      |
| ENSG00000239149 | 2.438432 | -1.595162 | 0.430642 | 1 SNORA59A      | -      |
| ENSG00000240032 | 2.438432 | -1.595162 | 0.430642 | 1 RP11-274H2.3  | -      |
| ENSG00000241547 | 2.438432 | -1.595162 | 0.430642 | 1 RP11-4K3__A.5 | K05692 |
| ENSG00000245067 | 2.438432 | -1.595162 | 0.430642 | 1 IGFBP7-AS1    | -      |
| ENSG00000245148 | 2.438432 | -1.595162 | 0.430642 | 1 ARAP1-AS2     | -      |
| ENSG00000249562 | 2.438432 | -1.595162 | 0.430642 | 1 RP11-116O11.2 | -      |
| ENSG00000249852 | 2.438432 | -1.595162 | 0.430642 | 1 AC145676.2    | -      |
| ENSG00000252516 | 2.438432 | -1.595162 | 0.430642 | 1 RNA5SP82      | -      |

|                 |          |           |          |                  |        |
|-----------------|----------|-----------|----------|------------------|--------|
| ENSG00000253463 | 2.438432 | -1.595162 | 0.430642 | 1 HMGB1P19       | K10802 |
| ENSG00000254122 | 2.438432 | -1.595162 | 0.430642 | 1 PCDHGB7        | K16496 |
| ENSG00000254710 | 2.438432 | -1.595162 | 0.430642 | 1 CTD-2216M2.1   | -      |
| ENSG00000254718 | 2.438432 | -1.595162 | 0.430642 | 1 CTD-2184C24.2  | -      |
| ENSG00000255120 | 2.438432 | -1.595162 | 0.430642 | 1 OVOL1-AS1      | -      |
| ENSG00000255318 | 2.438432 | -1.595162 | 0.430642 | 1 RP11-655M14.13 | -      |
| ENSG00000257193 | 2.438432 | -1.595162 | 0.430642 | 1 RP11-818F20.4  | -      |
| ENSG00000258102 | 2.438432 | -1.595162 | 0.430642 | 1 RP11-809C9.2   | -      |
| ENSG00000258818 | 2.438432 | -1.595162 | 0.430642 | 1 RNASE4         | K16632 |
| ENSG00000258890 | 2.438432 | -1.595162 | 0.430642 | 1 CEP95          | K16544 |
| ENSG00000258891 | 2.438432 | -1.595162 | 0.430642 | 1 RP5-1021I20.5  | -      |
| ENSG00000258929 | 2.438432 | -1.595162 | 0.430642 | 1 RP11-58E21.3   | -      |
| ENSG00000259326 | 2.438432 | -1.595162 | 0.430642 | 1 RP11-102L12.2  | -      |
| ENSG00000259341 | 2.438432 | -1.595162 | 0.430642 | 1 RP11-20G13.1   | -      |
| ENSG00000260086 | 2.438432 | -1.595162 | 0.430642 | 1 RP11-421I0.1   | -      |
| ENSG00000260528 | 2.438432 | -1.595162 | 0.430642 | 1 FAM157C        | -      |
| ENSG00000260592 | 2.438432 | -1.595162 | 0.430642 | 1 CTA-363E6.6    | -      |
| ENSG00000260884 | 2.438432 | -1.595162 | 0.430642 | 1 AC009120.5     | -      |
| ENSG00000261546 | 2.438432 | -1.595162 | 0.430642 | 1 CTD-2555A7.3   | -      |
| ENSG00000261567 | 2.438432 | -1.595162 | 0.430642 | 1 RP11-680G10.1  | -      |
| ENSG00000262098 | 2.438432 | -1.595162 | 0.430642 | 1 CTD-2561B21.10 | -      |
| ENSG00000262358 | 2.438432 | -1.595162 | 0.430642 | 1 CTD-3195I5.4   | -      |
| ENSG00000262601 | 2.438432 | -1.595162 | 0.430642 | 1 CTC-786C10.1   | -      |
| ENSG00000263105 | 2.438432 | -1.595162 | 0.430642 | 1 RP11-95P2.3    | -      |
| ENSG00000263916 | 2.438432 | -1.595162 | 0.430642 | 1 RP11-110H1.4   | -      |
| ENSG00000266573 | 2.438432 | -1.595162 | 0.430642 | 1 RP11-449D8.5   | -      |
| ENSG00000266891 | 2.438432 | -1.595162 | 0.430642 | 1 RP11-692N5.2   | K02900 |
| ENSG00000266964 | 2.438432 | -1.595162 | 0.430642 | 1 FXYD1          | K13360 |
| ENSG00000267033 | 2.438432 | -1.595162 | 0.430642 | 1 CTD-2562J15.4  | -      |
| ENSG00000267048 | 2.438432 | -1.595162 | 0.430642 | 1 RP11-566K11.7  | -      |
| ENSG00000267304 | 2.438432 | -1.595162 | 0.430642 | 1 AC004637.1     | -      |
| ENSG00000267394 | 2.438432 | -1.595162 | 0.430642 | 1 CTB-175E5.7    | -      |
| ENSG00000267510 | 2.438432 | -1.595162 | 0.430642 | 1 CTC-325H20.4   | -      |
| ENSG00000267747 | 2.438432 | -1.595162 | 0.430642 | 1 RP11-392O1.4   | -      |
| ENSG00000267795 | 2.438432 | -1.595162 | 0.430642 | 1 SMIM22         | -      |
| ENSG00000267964 | 2.438432 | -1.595162 | 0.430642 | 1 AC022400.2     | K11257 |
| ENSG00000267992 | 2.438432 | -1.595162 | 0.430642 | 1 CTB-189B5.3    | -      |
| ENSG00000268670 | 2.438432 | -1.595162 | 0.430642 | 1 CTD-2622I13.3  | -      |
| ENSG00000268931 | 2.438432 | -1.595162 | 0.430642 | 1 RP11-886P16.6  | -      |
| ENSG00000269889 | 2.438432 | -1.595162 | 0.430642 | 1 RP11-816J6.3   | -      |
| ENSG00000269903 | 2.438432 | -1.595162 | 0.430642 | 1 RP11-571M6.18  | -      |
| ENSG00000270265 | 2.438432 | -1.595162 | 0.430642 | 1 RP11-731D1.4   | -      |
| ENSG00000272006 | 2.438432 | -1.595162 | 0.430642 | 1 RP11-583F2.6   | K19601 |
| ENSG00000272627 | 2.438432 | -1.595162 | 0.430642 | 1 RP11-354E23.5  | -      |
| ENSG00000272707 | 2.438432 | -1.595162 | 0.430642 | 1 RP11-534C12.1  | -      |
| ENSG00000272834 | 2.438432 | -1.595162 | 0.430642 | 1 RP5-1042K10.13 | -      |
| ENSG00000273013 | 2.438432 | -1.595162 | 0.430642 | 1 CTD-2002J20.1  | -      |
| ENSG00000273183 | 2.438432 | -1.595162 | 0.430642 | 1 RP11-5C23.2    | -      |
| ENSG00000023892 | 1.546197 | -1.432825 | 0.430642 | 1 DEF6           | -      |
| ENSG00000036530 | 1.546197 | -1.432825 | 0.430642 | 1 CYP46A1        | K07440 |
| ENSG00000079931 | 1.546197 | -1.432825 | 0.430642 | 1 MOXD1          | -      |
| ENSG00000101470 | 1.546197 | -1.432825 | 0.430642 | 1 TNNC2          | K12042 |
| ENSG00000104313 | 1.546197 | -1.432825 | 0.430642 | 1 EYA1           | K15616 |
| ENSG00000124557 | 1.546197 | -1.432825 | 0.430642 | 1 BTN1A1         | K06712 |
| ENSG00000127957 | 1.546197 | -1.432825 | 0.430642 | 1 PMS2P3         | K10858 |
| ENSG00000130948 | 1.546197 | -1.432825 | 0.430642 | 1 HSD17B3        | K10207 |
| ENSG00000133101 | 1.546197 | -1.432825 | 0.430642 | 1 CCNA1          | K06627 |
| ENSG00000134594 | 1.546197 | -1.432825 | 0.430642 | 1 RAB33A         | K07919 |

|                 |          |           |          |                 |        |
|-----------------|----------|-----------|----------|-----------------|--------|
| ENSG00000137270 | 1.546197 | -1.432825 | 0.430642 | 1 GCM1          | K12581 |
| ENSG00000139767 | 1.546197 | -1.432825 | 0.430642 | 1 SRRM4         | -      |
| ENSG00000142173 | 1.546197 | -1.432825 | 0.430642 | 1 COL6A2        | K06238 |
| ENSG00000145934 | 1.546197 | -1.432825 | 0.430642 | 1 TENM2         | -      |
| ENSG00000157303 | 1.546197 | -1.432825 | 0.430642 | 1 SUSD3         | -      |
| ENSG00000159166 | 1.546197 | -1.432825 | 0.430642 | 1 LAD1          | -      |
| ENSG00000159904 | 1.546197 | -1.432825 | 0.430642 | 1 ZNF890P       | K09228 |
| ENSG00000162630 | 1.546197 | -1.432825 | 0.430642 | 1 B3GALT2       | K07820 |
| ENSG00000164309 | 1.546197 | -1.432825 | 0.430642 | 1 CMYA5         | -      |
| ENSG00000164591 | 1.546197 | -1.432825 | 0.430642 | 1 MYOZ3         | -      |
| ENSG00000164744 | 1.546197 | -1.432825 | 0.430642 | 1 SUN3          | -      |
| ENSG00000168263 | 1.546197 | -1.432825 | 0.430642 | 1 KCNV2         | K04935 |
| ENSG00000168955 | 1.546197 | -1.432825 | 0.430642 | 1 TM4SF20       | K09228 |
| ENSG00000173567 | 1.546197 | -1.432825 | 0.430642 | 1 GPR113        | K08456 |
| ENSG00000174827 | 1.546197 | -1.432825 | 0.430642 | 1 PDZK1         | -      |
| ENSG00000174898 | 1.546197 | -1.432825 | 0.430642 | 1 CATSPERD      | K16895 |
| ENSG00000175189 | 1.546197 | -1.432825 | 0.430642 | 1 INHBC         | K04667 |
| ENSG00000179772 | 1.546197 | -1.432825 | 0.430642 | 1 FOXS1         | K09412 |
| ENSG00000184524 | 1.546197 | -1.432825 | 0.430642 | 1 CEND1         | -      |
| ENSG00000188234 | 1.546197 | -1.432825 | 0.430642 | 1 AGAP4         | K12491 |
| ENSG00000196193 | 1.546197 | -1.432825 | 0.430642 | 1 AC034229.1    | -      |
| ENSG00000196503 | 1.546197 | -1.432825 | 0.430642 | 1 ARL9          | K07957 |
| ENSG00000197727 | 1.546197 | -1.432825 | 0.430642 | 1 AL022341.1    | -      |
| ENSG00000198374 | 1.546197 | -1.432825 | 0.430642 | 1 HIST1H2AL     | K11251 |
| ENSG00000198673 | 1.546197 | -1.432825 | 0.430642 | 1 FAM19A2       | -      |
| ENSG00000203321 | 1.546197 | -1.432825 | 0.430642 | 1 RP11-197P3.4  | -      |
| ENSG00000204387 | 1.546197 | -1.432825 | 0.430642 | 1 C6orf48       | -      |
| ENSG00000221184 | 1.546197 | -1.432825 | 0.430642 | 1 MIR1254-1     | -      |
| ENSG00000224903 | 1.546197 | -1.432825 | 0.430642 | 1 AC005534.8    | -      |
| ENSG00000225345 | 1.546197 | -1.432825 | 0.430642 | 1 SNX18P3       | K17299 |
| ENSG00000225580 | 1.546197 | -1.432825 | 0.430642 | 1 RP1-159M24.1  | -      |
| ENSG00000225883 | 1.546197 | -1.432825 | 0.430642 | 1 BMS1P11       | K14569 |
| ENSG00000226833 | 1.546197 | -1.432825 | 0.430642 | 1 AC097724.3    | -      |
| ENSG00000227113 | 1.546197 | -1.432825 | 0.430642 | 1 RP11-460N20.4 | -      |
| ENSG00000227158 | 1.546197 | -1.432825 | 0.430642 | 1 AC073621.2    | K10692 |
| ENSG00000228150 | 1.546197 | -1.432825 | 0.430642 | 1 RP11-84A14.4  | -      |
| ENSG00000228748 | 1.546197 | -1.432825 | 0.430642 | 1 RP13-39P12.3  | -      |
| ENSG00000228816 | 1.546197 | -1.432825 | 0.430642 | 1 AK3P5         | K00944 |
| ENSG00000229020 | 1.546197 | -1.432825 | 0.430642 | 1 AKR7A2P1      | K15303 |
| ENSG00000229425 | 1.546197 | -1.432825 | 0.430642 | 1 AJ006998.2    | -      |
| ENSG00000229512 | 1.546197 | -1.432825 | 0.430642 | 1 AC068580.5    | -      |
| ENSG00000232545 | 1.546197 | -1.432825 | 0.430642 | 1 KB-318B8.7    | -      |
| ENSG00000232814 | 1.546197 | -1.432825 | 0.430642 | 1 COL4A2-AS1    | -      |
| ENSG00000233654 | 1.546197 | -1.432825 | 0.430642 | 1 AC093388.3    | -      |
| ENSG00000234084 | 1.546197 | -1.432825 | 0.430642 | 1 RP3-388E23.2  | -      |
| ENSG00000236266 | 1.546197 | -1.432825 | 0.430642 | 1 RP3-467L1.4   | -      |
| ENSG00000236527 | 1.546197 | -1.432825 | 0.430642 | 1 ARF4P2        | K07939 |
| ENSG00000236670 | 1.546197 | -1.432825 | 0.430642 | 1 KRT18P5       | K07604 |
| ENSG00000237371 | 1.546197 | -1.432825 | 0.430642 | 1 RP13-152O15.5 | -      |
| ENSG00000238221 | 1.546197 | -1.432825 | 0.430642 | 1 RP11-69L16.4  | -      |
| ENSG00000241180 | 1.546197 | -1.432825 | 0.430642 | 1 RP11-54O7.2   | -      |
| ENSG00000241293 | 1.546197 | -1.432825 | 0.430642 | 1 PPATP1        | K00764 |
| ENSG00000242094 | 1.546197 | -1.432825 | 0.430642 | 1 FOXP1-IT1     | -      |
| ENSG00000244124 | 1.546197 | -1.432825 | 0.430642 | 1 ATP1B3-AS1    | -      |
| ENSG00000244952 | 1.546197 | -1.432825 | 0.430642 | 1 RP11-1000B6.5 | -      |
| ENSG00000245330 | 1.546197 | -1.432825 | 0.430642 | 1 KB-1471A8.1   | -      |
| ENSG00000245869 | 1.546197 | -1.432825 | 0.430642 | 1 RP11-158I9.5  | -      |
| ENSG00000246575 | 1.546197 | -1.432825 | 0.430642 | 1 AC093162.5    | K09516 |

|                 |           |           |          |                  |              |
|-----------------|-----------|-----------|----------|------------------|--------------|
| ENSG00000249207 | 1.546197  | -1.432825 | 0.430642 | 1 RP11-360F5.1   | -            |
| ENSG00000250021 | 1.546197  | -1.432825 | 0.430642 | 1 C15orf38-AP3S2 | K12399       |
| ENSG00000250072 | 1.546197  | -1.432825 | 0.430642 | 1 CTC-529P8.1    | -            |
| ENSG00000251414 | 1.546197  | -1.432825 | 0.430642 | 1 RP11-843P14.1  | -            |
| ENSG00000251497 | 1.546197  | -1.432825 | 0.430642 | 1 RP11-197N18.7  | -            |
| ENSG00000252916 | 1.546197  | -1.432825 | 0.430642 | 1 RNU6-762P      | -            |
| ENSG00000253304 | 1.546197  | -1.432825 | 0.430642 | 1 TMEM200B       | -            |
| ENSG00000253483 | 1.546197  | -1.432825 | 0.430642 | 1 CTC-756D1.1    | K09525       |
| ENSG00000253603 | 1.546197  | -1.432825 | 0.430642 | 1 CTA-397H3.3    | -            |
| ENSG00000254207 | 1.546197  | -1.432825 | 0.430642 | 1 RP11-43A14.1   | -            |
| ENSG00000254991 | 1.546197  | -1.432825 | 0.430642 | 1 RP13-631K18.3  | -            |
| ENSG00000258471 | 1.546197  | -1.432825 | 0.430642 | 1 RP11-84C10.4   | -            |
| ENSG00000258628 | 1.546197  | -1.432825 | 0.430642 | 1 RP11-492D6.3   | K17985       |
| ENSG00000259659 | 1.546197  | -1.432825 | 0.430642 | 1 RP11-151N17.1  | -            |
| ENSG00000259797 | 1.546197  | -1.432825 | 0.430642 | 1 RP11-96D1.3    | -            |
| ENSG00000260277 | 1.546197  | -1.432825 | 0.430642 | 1 RP11-101E7.2   | -            |
| ENSG00000260735 | 1.546197  | -1.432825 | 0.430642 | 1 RP11-72I8.1    | -            |
| ENSG00000261766 | 1.546197  | -1.432825 | 0.430642 | 1 RP11-22P6.2    | -            |
| ENSG00000261821 | 1.546197  | -1.432825 | 0.430642 | 1 CTD-2311M21.3  | -            |
| ENSG00000262420 | 1.546197  | -1.432825 | 0.430642 | 1 RP11-490O6.2   | -            |
| ENSG00000263740 | 1.546197  | -1.432825 | 0.430642 | 1 RN7SL4P        | -            |
| ENSG00000265136 | 1.546197  | -1.432825 | 0.430642 | 1 RP13-638C3.6   | K16742       |
| ENSG00000265465 | 1.546197  | -1.432825 | 0.430642 | 1 MIR4768        | -            |
| ENSG00000266578 | 1.546197  | -1.432825 | 0.430642 | 1 RP11-838N2.5   | -            |
| ENSG00000266643 | 1.546197  | -1.432825 | 0.430642 | 1 MIR3677        | -            |
| ENSG00000267505 | 1.546197  | -1.432825 | 0.430642 | 1 CTC-296K1.3    | -            |
| ENSG00000267507 | 1.546197  | -1.432825 | 0.430642 | 1 CTD-2587H24.1  | -            |
| ENSG00000267633 | 1.546197  | -1.432825 | 0.430642 | 1 CTB-5E10.3     | -            |
| ENSG00000268199 | 1.546197  | -1.432825 | 0.430642 | 1 CTD-3137H5.1   | -            |
| ENSG00000268279 | 1.546197  | -1.432825 | 0.430642 | 1 RP11-434D12.1  | K10838       |
| ENSG00000269887 | 1.546197  | -1.432825 | 0.430642 | 1 RP11-477H21.2  | -            |
| ENSG00000269924 | 1.546197  | -1.432825 | 0.430642 | 1 RP11-697N18.4  | -            |
| ENSG00000272377 | 1.546197  | -1.432825 | 0.430642 | 1 RP11-682N22.1  | -            |
| ENSG00000272382 | 1.546197  | -1.432825 | 0.430642 | 1 CTD-2035E11.4  | -            |
| ENSG00000272812 | 1.546197  | -1.432825 | 0.430642 | 1 RP5-855D21.3   | -            |
| ENSG00000272906 | 1.546197  | -1.432825 | 0.430642 | 1 RP11-533E19.7  | -            |
| ENSG00000272970 | 1.546197  | -1.432825 | 0.430642 | 1 RP11-329B9.4   | -            |
| ENSG00000169299 | -0.525052 | 5.394308  | 0.430652 | 1 PGM2           | K15779       |
| ENSG00000140386 | 0.539414  | 3.96902   | 0.430684 | 1 SCAPER         | -            |
| ENSG00000163539 | -0.53104  | 4.634028  | 0.430696 | 1 CLASP2         | K16578       |
| ENSG00000140451 | -0.532223 | 4.437989  | 0.431095 | 1 PIF1           | K15255       |
| ENSG00000066827 | 0.548736  | 3.368953  | 0.431105 | 1 ZFAT           | -            |
| ENSG00000129595 | 0.538406  | 3.373389  | 0.431105 | 1 EPB41L4A       | -            |
| ENSG00000254901 | 0.536652  | 3.56367   | 0.431264 | 1 MEF2BNB        | K15696       |
| ENSG00000108852 | 0.534711  | 3.809039  | 0.431429 | 1 MPP2           | -            |
| ENSG00000156639 | 0.521815  | 5.828366  | 0.431503 | 1 ZFAND3         | K08834       |
| ENSG00000198879 | 0.521878  | 5.865031  | 0.431518 | 1 SFMBT2         | K12606       |
| ENSG00000152147 | -0.530756 | 4.607343  | 0.431759 | 1 GEMIN6         | K13134       |
| ENSG00000197056 | -0.5293   | 4.73443   | 0.431792 | 1 ZMYM1          | -            |
| ENSG00000164574 | -0.52693  | 4.952204  | 0.431843 | 1 GALNT10        | K00710       |
| ENSG00000007314 | -0.876415 | 0.132235  | 0.431875 | 1 SCN4A          | K04837       |
| ENSG00000165406 | -0.876415 | 0.132235  | 0.431875 | 1                | 8-Mar K10656 |
| ENSG00000225265 | -0.876415 | 0.132235  | 0.431875 | 1 RP11-378J18.3  | -            |
| ENSG00000240731 | -0.876415 | 0.132235  | 0.431875 | 1 RP5-890O3.9    | -            |
| ENSG00000069667 | 0.875871  | -0.061516 | 0.431875 | 1 RORA           | K08532       |
| ENSG00000111291 | 0.875871  | -0.061516 | 0.431875 | 1 GPRC5D         | K04621       |
| ENSG00000117983 | 0.875871  | -0.061516 | 0.431875 | 1 MUC5B          | K13908       |
| ENSG00000121104 | 0.875871  | -0.061516 | 0.431875 | 1 FAM117A        | -            |



|                 |           |           |          |                  |        |
|-----------------|-----------|-----------|----------|------------------|--------|
| ENSG00000125531 | 0.875871  | -0.061516 | 0.431875 | 1 C20orf195      | -      |
| ENSG00000164266 | 0.875871  | -0.061516 | 0.431875 | 1 SPINK1         | -      |
| ENSG00000169885 | 0.875871  | -0.061516 | 0.431875 | 1 CALML6         | K02183 |
| ENSG00000169962 | 0.875871  | -0.061516 | 0.431875 | 1 TAS1R3         | K04626 |
| ENSG00000215394 | 0.875871  | -0.061516 | 0.431875 | 1 BMS1P18        | -      |
| ENSG00000216331 | 0.875871  | -0.061516 | 0.431875 | 1 HIST1H1PS1     | -      |
| ENSG00000220472 | 0.875871  | -0.061516 | 0.431875 | 1 RP11-69L16.5   | K02985 |
| ENSG00000229931 | 0.875871  | -0.061516 | 0.431875 | 1 RP1-151F17.1   | -      |
| ENSG00000232611 | 0.875871  | -0.061516 | 0.431875 | 1 RP11-1114A5.4  | -      |
| ENSG00000234742 | 0.875871  | -0.061516 | 0.431875 | 1 AC144530.1     | K02880 |
| ENSG00000236364 | 0.875871  | -0.061516 | 0.431875 | 1 RP11-525G13.2  | -      |
| ENSG00000248109 | 0.875871  | -0.061516 | 0.431875 | 1 CTC-295J13.3   | -      |
| ENSG00000161653 | -0.799116 | 0.08425   | 0.431875 | 1 NAGS           | K11067 |
| ENSG00000163806 | -0.799116 | 0.08425   | 0.431875 | 1 SPDYA          | K08694 |
| ENSG00000168676 | -0.799116 | 0.08425   | 0.431875 | 1 KCTD19         | -      |
| ENSG00000230565 | -0.799116 | 0.08425   | 0.431875 | 1 ZNF32-AS2      | -      |
| ENSG00000235105 | -0.799116 | 0.08425   | 0.431875 | 1 RP11-329A14.1  | K17532 |
| ENSG00000241634 | -0.799116 | 0.08425   | 0.431875 | 1 RP11-381E24.1  | -      |
| ENSG00000242220 | -0.799116 | 0.08425   | 0.431875 | 1 TCP10L         | -      |
| ENSG00000246640 | -0.799116 | 0.08425   | 0.431875 | 1 RP11-1094H24.4 | -      |
| ENSG00000257773 | -0.799116 | 0.08425   | 0.431875 | 1 ST13P3         | K09560 |
| ENSG00000273018 | -0.799116 | 0.08425   | 0.431875 | 1 CTD-2303H24.2  | -      |
| ENSG00000071073 | 0.740538  | -0.00618  | 0.431875 | 1 MGAT4A         | K00738 |
| ENSG00000159905 | 0.740538  | -0.00618  | 0.431875 | 1 ZNF221         | K09228 |
| ENSG00000214940 | 0.740538  | -0.00618  | 0.431875 | 1 NPIPA8         | K04985 |
| ENSG00000228335 | 0.740538  | -0.00618  | 0.431875 | 1 AC073063.10    | K18732 |
| ENSG00000233885 | 0.740538  | -0.00618  | 0.431875 | 1 YEATS2-AS1     | -      |
| ENSG00000262154 | 0.740538  | -0.00618  | 0.431875 | 1 LA16c-352F10.1 | K03113 |
| ENSG00000267871 | 0.740538  | -0.00618  | 0.431875 | 1 CTC-444N24.6   | -      |
| ENSG00000136051 | -0.520439 | 6.320799  | 0.432012 | 1 KIAA1033       | K18465 |
| ENSG00000100068 | 0.552444  | 2.528735  | 0.43206  | 1 LRP5L          | K03068 |
| ENSG00000183674 | 0.56162   | 2.847399  | 0.432247 | 1 LINC00518      | -      |
| ENSG00000068971 | 0.552833  | 3.230754  | 0.432343 | 1 PPP2R5B        | K11584 |
| ENSG00000166821 | 0.533921  | 4.064072  | 0.432349 | 1 PEX11A         | K13351 |
| ENSG00000112208 | -0.519559 | 6.507903  | 0.432464 | 1 BAG2           | K09556 |
| ENSG00000211455 | -0.523819 | 5.630788  | 0.432489 | 1 STK38L         | K08790 |
| ENSG00000197930 | 0.516277  | 7.237882  | 0.432621 | 1 ERO1L          | K10950 |
| ENSG00000171310 | -0.527276 | 4.789261  | 0.43277  | 1 CHST11         | K01017 |
| ENSG00000185129 | -0.528923 | 4.446022  | 0.43293  | 1 PURA           | -      |
| ENSG00000124160 | -0.534489 | 4.291478  | 0.433011 | 1 NCOA5          | -      |
| ENSG00000197448 | -0.516833 | 6.843918  | 0.433077 | 1 GSTK1          | K13299 |
| ENSG00000165030 | 0.518817  | 6.123931  | 0.433146 | 1 NFIL3          | K09059 |
| ENSG00000112290 | -0.530212 | 4.814374  | 0.433233 | 1 WASF1          | K05753 |
| ENSG00000100101 | -0.532124 | 4.427857  | 0.433555 | 1 NOL12          | K14851 |
| ENSG00000075643 | -0.521627 | 5.397424  | 0.433823 | 1 MOCOS          | K15631 |
| ENSG00000121578 | -0.521807 | 5.598643  | 0.433877 | 1 B4GALT4        | K07969 |
| ENSG00000165801 | 0.54715   | 2.953474  | 0.433945 | 1 ARHGEF40       | -      |
| ENSG00000187239 | 0.523774  | 5.286412  | 0.433949 | 1 FNBP1          | -      |
| ENSG00000136273 | -0.541006 | 3.97261   | 0.434044 | 1 HUS1           | K10903 |
| ENSG00000178694 | -0.566455 | 2.835549  | 0.434058 | 1 NSUN3          | -      |
| ENSG00000181016 | 0.635717  | 1.386     | 0.43406  | 1 LSMEM1         | -      |
| ENSG00000249626 | -0.630941 | 1.460585  | 0.43406  | 1 RP11-496H1.1   | K15425 |
| ENSG00000102100 | 0.592863  | 1.405105  | 0.43406  | 1 SLC35A2        | K15272 |
| ENSG00000269473 | 0.592863  | 1.405105  | 0.43406  | 1 CTD-2619J13.19 | -      |
| ENSG00000269896 | 0.592863  | 1.405105  | 0.43406  | 1 RP4-740C4.6    | -      |
| ENSG00000163933 | -0.528553 | 4.41558   | 0.434192 | 1 RFT1           | K06316 |
| ENSG00000120756 | -0.531501 | 4.36552   | 0.434262 | 1 PLS1           | K17275 |
| ENSG00000161955 | -0.585607 | 2.49808   | 0.434301 | 1 TNFSF13        | K05475 |

|                 |           |           |          |                 |        |
|-----------------|-----------|-----------|----------|-----------------|--------|
| ENSG00000167680 | 0.583873  | 2.261748  | 0.434415 | 1 SEMA6B        | K06842 |
| ENSG00000245614 | -0.611264 | 1.814063  | 0.434448 | 1 DDX11-AS1     | -      |
| ENSG00000223380 | 0.594808  | 2.024085  | 0.43449  | 1 SEC22B        | -      |
| ENSG00000261505 | 0.594808  | 2.024085  | 0.43449  | 1 LA16c-358B7.3 | -      |
| ENSG00000137806 | -0.529506 | 4.495372  | 0.434673 | 1 NDUFAF1       | K18159 |
| ENSG00000106028 | -0.52459  | 5.103688  | 0.434981 | 1 SSBP1         | -      |
| ENSG00000136100 | -0.519013 | 5.610335  | 0.435234 | 1 VPS36         | K12190 |
| ENSG00000099797 | 0.515892  | 6.345524  | 0.435302 | 1 TECR          | K10258 |
| ENSG00000273344 | 0.547547  | 3.046656  | 0.435437 | 1 PAXIP1-AS1    | -      |
| ENSG00000237765 | -0.525324 | 4.648032  | 0.43549  | 1 FAM200B       | -      |
| ENSG00000186480 | -0.517583 | 5.756709  | 0.435679 | 1 INSIG1        | -      |
| ENSG00000166401 | -0.55612  | 2.797907  | 0.435981 | 1 SERPINB8      | K13963 |
| ENSG00000163320 | -0.517281 | 5.871766  | 0.436095 | 1 CGGBP1        | -      |
| ENSG00000253954 | -0.557399 | 2.630823  | 0.43632  | 1 HMGN1P38      | K11299 |
| ENSG00000182481 | 0.525282  | 4.65683   | 0.436505 | 1 KPNA2         | K15043 |
| ENSG00000173821 | 0.51177   | 7.281181  | 0.436575 | 1 RNF213        | K03327 |
| ENSG00000261526 | 0.580867  | 2.409158  | 0.436716 | 1 CTB-31O20.2   | -      |
| ENSG00000169679 | -0.51145  | 7.396045  | 0.436921 | 1 BUB1          | K02178 |
| ENSG00000127481 | 0.511194  | 7.344218  | 0.437005 | 1 UBR4          | K10691 |
| ENSG00000101079 | 0.515201  | 5.604531  | 0.437161 | 1 NDRG3         | K17985 |
| ENSG00000133460 | 0.552658  | 2.871806  | 0.437536 | 1 SLC2A11       | K08148 |
| ENSG00000196159 | -0.552891 | 3.342712  | 0.437553 | 1 FAT4          | K16669 |
| ENSG00000143507 | -0.603303 | 1.990601  | 0.437711 | 1 DUSP10        | K04459 |
| ENSG00000180917 | -0.532583 | 4.074787  | 0.437884 | 1 CMTR2         | K14590 |
| ENSG00000117153 | -0.520646 | 4.712861  | 0.437903 | 1 KLHL12        | K10450 |
| ENSG00000134321 | -1.161914 | -0.282393 | 0.438083 | 1 RSAD2         | K15045 |
| ENSG00000157064 | -1.161914 | -0.282393 | 0.438083 | 1 NMNAT2        | K06210 |
| ENSG00000166246 | -1.161914 | -0.282393 | 0.438083 | 1 C16orf71      | -      |
| ENSG00000239704 | -1.161914 | -0.282393 | 0.438083 | 1 CDRT4         | -      |
| ENSG00000261575 | -1.161914 | -0.282393 | 0.438083 | 1 RP11-259G18.1 | -      |
| ENSG00000140678 | 1.021395  | -0.417965 | 0.438083 | 1 ITGAX         | K06462 |
| ENSG00000167311 | 1.021395  | -0.417965 | 0.438083 | 1 ART5          | K00775 |
| ENSG00000178429 | 1.021395  | -0.417965 | 0.438083 | 1 RPS3AP5       | K02984 |
| ENSG00000204956 | 1.021395  | -0.417965 | 0.438083 | 1 PCDHGA1       | K16495 |
| ENSG00000215126 | 1.021395  | -0.417965 | 0.438083 | 1 CBWD7         | -      |
| ENSG00000247982 | 1.021395  | -0.417965 | 0.438083 | 1 LINC00926     | -      |
| ENSG00000271643 | 1.021395  | -0.417965 | 0.438083 | 1 RP11-10C24.3  | -      |
| ENSG00000121101 | 0.832987  | -0.346466 | 0.438083 | 1 TEX14         | K17540 |
| ENSG00000143554 | 0.832987  | -0.346466 | 0.438083 | 1 SLC27A3       | K08772 |
| ENSG00000187994 | 0.832987  | -0.346466 | 0.438083 | 1 RINL          | -      |
| ENSG00000204282 | 0.832987  | -0.346466 | 0.438083 | 1 TNRC6C-AS1    | -      |
| ENSG00000225077 | 0.832987  | -0.346466 | 0.438083 | 1 LINC00337     | -      |
| ENSG00000226281 | 0.832987  | -0.346466 | 0.438083 | 1 RP1-80N2.2    | -      |
| ENSG00000229951 | 0.832987  | -0.346466 | 0.438083 | 1 AC104695.3    | -      |
| ENSG00000230979 | 0.832987  | -0.346466 | 0.438083 | 1 AC079250.1    | K02882 |
| ENSG00000259556 | 0.832987  | -0.346466 | 0.438083 | 1 RP11-56B16.2  | K15177 |
| ENSG00000260236 | 0.832987  | -0.346466 | 0.438083 | 1 RP11-708J19.1 | -      |
| ENSG00000260750 | 0.832987  | -0.346466 | 0.438083 | 1 RP11-482M8.1  | -      |
| ENSG00000264918 | 0.832987  | -0.346466 | 0.438083 | 1 AC005229.1    | -      |
| ENSG00000270607 | 0.832987  | -0.346466 | 0.438083 | 1 RP11-359E10.1 | -      |
| ENSG00000173163 | -0.539079 | 3.517175  | 0.438166 | 1 COMMD1        | -      |
| ENSG00000042317 | -0.665103 | 1.712497  | 0.438288 | 1 SPATA7        | K19655 |
| ENSG00000116977 | -0.665103 | 1.712497  | 0.438288 | 1 LGALS8        | K06832 |
| ENSG00000182405 | -0.665103 | 1.712497  | 0.438288 | 1 PGBD4         | -      |
| ENSG00000232561 | 0.621713  | 1.644884  | 0.438288 | 1 GTF2IP1       | K03121 |
| ENSG00000268885 | 0.621713  | 1.644884  | 0.438288 | 1 AC026740.1    | -      |
| ENSG00000134668 | 0.712226  | 0.74652   | 0.438358 | 1 SPOCD1        | K17596 |
| ENSG00000156345 | 0.712226  | 0.74652   | 0.438358 | 1 CDK20         | K08817 |

|                 |           |           |          |                 |        |
|-----------------|-----------|-----------|----------|-----------------|--------|
| ENSG00000166676 | 0.712226  | 0.74652   | 0.438358 | 1 TVP23A        | -      |
| ENSG00000226803 | 0.712226  | 0.74652   | 0.438358 | 1 RP11-203B9.4  | -      |
| ENSG00000262089 | 0.712226  | 0.74652   | 0.438358 | 1 RP11-589P10.5 | -      |
| ENSG00000130203 | 0.64241   | 0.777194  | 0.438358 | 1 APOE          | K17985 |
| ENSG00000006459 | 0.525743  | 4.103025  | 0.438488 | 1 KDM7A         | K11445 |
| ENSG00000155100 | -0.515578 | 5.270536  | 0.438495 | 1 OTUD6B        | K18342 |
| ENSG00000110031 | 0.605558  | 1.284757  | 0.438759 | 1 LPXN          | -      |
| ENSG00000075240 | 0.526995  | 4.351395  | 0.438812 | 1 GRAMD4        | -      |
| ENSG00000125703 | -0.516099 | 5.104944  | 0.438875 | 1 ATG4C         | K08342 |
| ENSG00000166986 | -0.508365 | 8.078617  | 0.438915 | 1 MARS          | K01874 |
| ENSG00000184500 | 0.515356  | 4.786743  | 0.439035 | 1 PROS1         | K03908 |
| ENSG00000170632 | -0.515801 | 5.526436  | 0.439214 | 1 ARMC10        | K10279 |
| ENSG00000113594 | -0.509732 | 6.936154  | 0.439219 | 1 LIFR          | -      |
| ENSG00000268573 | 0.564964  | 2.359454  | 0.439326 | 1 RP11-158H5.7  | -      |
| ENSG00000196123 | -0.55358  | 3.206933  | 0.439496 | 1 KIAA0895L     | -      |
| ENSG00000107833 | -0.511527 | 6.29096   | 0.439731 | 1 NPM3          | K11278 |
| ENSG00000118894 | -0.530274 | 3.850316  | 0.439739 | 1 FAM86A        | -      |
| ENSG00000109762 | 0.510468  | 5.562361  | 0.440152 | 1 SNX25         | K17887 |
| ENSG00000114353 | 0.571841  | 2.138603  | 0.440198 | 1 GNAI2         | -      |
| ENSG00000182704 | 0.508529  | 6.719998  | 0.440411 | 1 TSKU          | K08130 |
| ENSG00000137133 | -0.524937 | 4.621607  | 0.440454 | 1 HINT2         | -      |
| ENSG00000089048 | -0.520637 | 4.861768  | 0.440569 | 1 ESF1          | -      |
| ENSG00000124587 | 0.511223  | 5.887466  | 0.440578 | 1 PEX6          | K13339 |
| ENSG00000160746 | -0.528799 | 4.123286  | 0.440761 | 1 ANO10         | -      |
| ENSG00000132535 | 0.528361  | 4.11065   | 0.440761 | 1 DLG4          | K11828 |
| ENSG00000118246 | -0.514938 | 5.408796  | 0.440761 | 1 FASTKD2       | K18190 |
| ENSG00000239911 | -0.57149  | 2.528413  | 0.441081 | 1 PRKAG2-AS1    | -      |
| ENSG00000109458 | -0.545527 | 3.359753  | 0.441399 | 1 GAB1          | K09593 |
| ENSG00000225031 | 0.528081  | 3.864457  | 0.441404 | 1 EIF4BP7       | K03258 |
| ENSG00000249815 | 0.528081  | 3.864457  | 0.441404 | 1 RP11-269F21.3 | -      |
| ENSG00000104517 | 0.505851  | 7.657614  | 0.441427 | 1 UBR5          | K10593 |
| ENSG00000130803 | 0.511825  | 5.149483  | 0.441672 | 1 ZNF317        | K09228 |
| ENSG00000078237 | -0.516467 | 4.903293  | 0.44169  | 1 C12orf5       | K14634 |
| ENSG00000066629 | 0.515351  | 4.95205   | 0.441741 | 1 EML1          | K18595 |
| ENSG00000137269 | -0.52975  | 3.804034  | 0.441876 | 1 LRRC1         | K16175 |
| ENSG00000204856 | -0.515692 | 4.866259  | 0.441929 | 1 FAM216A       | K06883 |
| ENSG00000140416 | -0.507215 | 6.716616  | 0.441934 | 1 TPM1          | K10373 |
| ENSG00000166788 | -0.527833 | 4.045875  | 0.44206  | 1 SAAL1         | -      |
| ENSG00000165948 | 0.523991  | 4.138399  | 0.44213  | 1 IFI27L1       | -      |
| ENSG00000174720 | -0.513026 | 5.543424  | 0.442312 | 1 LARP7         | K15191 |
| ENSG00000149418 | 0.528505  | 3.71191   | 0.442399 | 1 ST14          | K08670 |
| ENSG00000088543 | 1.324815  | -0.890764 | 0.442579 | 1 C3orf18       | -      |
| ENSG00000103740 | 1.324815  | -0.890764 | 0.442579 | 1 ACSBG1        | K15013 |
| ENSG00000106633 | 1.324815  | -0.890764 | 0.442579 | 1 GCK           | K12407 |
| ENSG00000108950 | 1.324815  | -0.890764 | 0.442579 | 1 FAM20A        | -      |
| ENSG00000127241 | 1.324815  | -0.890764 | 0.442579 | 1 MASP1         | K03992 |
| ENSG00000135951 | 1.324815  | -0.890764 | 0.442579 | 1 TSGA10        | -      |
| ENSG00000156886 | 1.324815  | -0.890764 | 0.442579 | 1 ITGAD         | K06594 |
| ENSG00000163352 | 1.324815  | -0.890764 | 0.442579 | 1 LENEPE        | -      |
| ENSG00000189431 | 1.324815  | -0.890764 | 0.442579 | 1 RASSF10       | K09856 |
| ENSG00000196890 | 1.324815  | -0.890764 | 0.442579 | 1 HIST3H2BB     | K11252 |
| ENSG00000204659 | 1.324815  | -0.890764 | 0.442579 | 1 CBY3          | -      |
| ENSG00000205838 | 1.324815  | -0.890764 | 0.442579 | 1 TTC23L        | -      |
| ENSG00000219470 | 1.324815  | -0.890764 | 0.442579 | 1 RP3-337H4.6   | K02981 |
| ENSG00000224559 | 1.324815  | -0.890764 | 0.442579 | 1 LINC01087     | -      |
| ENSG00000229525 | 1.324815  | -0.890764 | 0.442579 | 1 AC053503.4    | -      |
| ENSG00000241269 | 1.324815  | -0.890764 | 0.442579 | 1 AC093620.5    | -      |
| ENSG00000243789 | 1.324815  | -0.890764 | 0.442579 | 1 JMJD7         | K16342 |

|                 |           |           |          |                  |        |
|-----------------|-----------|-----------|----------|------------------|--------|
| ENSG00000250616 | 1.324815  | -0.890764 | 0.442579 | 1 RP11-455F5.3   | -      |
| ENSG00000251102 | 1.324815  | -0.890764 | 0.442579 | 1 CTBP2P4        | K04496 |
| ENSG00000251580 | 1.324815  | -0.890764 | 0.442579 | 1 RP11-539L10.3  | -      |
| ENSG00000260490 | 1.324815  | -0.890764 | 0.442579 | 1 RP11-265N6.3   | K12757 |
| ENSG00000261441 | 1.324815  | -0.890764 | 0.442579 | 1 RP11-217B1.2   | -      |
| ENSG00000264548 | 1.324815  | -0.890764 | 0.442579 | 1 RP13-516M14.2  | -      |
| ENSG00000268225 | 1.324815  | -0.890764 | 0.442579 | 1 CTD-2331H12.5  | K09228 |
| ENSG00000268379 | 1.324815  | -0.890764 | 0.442579 | 1 CTC-360J11.4   | K17659 |
| ENSG00000269952 | 1.324815  | -0.890764 | 0.442579 | 1 RP11-324I22.3  | -      |
| ENSG00000273186 | 1.324815  | -0.890764 | 0.442579 | 1 RP11-339B21.10 | -      |
| ENSG00000273243 | 1.324815  | -0.890764 | 0.442579 | 1 CTA-217C2.2    | -      |
| ENSG00000068985 | -1.249252 | -0.666575 | 0.442579 | 1 PAGE1          | -      |
| ENSG00000109743 | -1.249252 | -0.666575 | 0.442579 | 1 BST1           | K18152 |
| ENSG00000110025 | -1.249252 | -0.666575 | 0.442579 | 1 SNX15          | K17927 |
| ENSG00000123201 | -1.249252 | -0.666575 | 0.442579 | 1 GUCY1B2        | K12319 |
| ENSG00000134548 | -1.249252 | -0.666575 | 0.442579 | 1 C12orf39       | -      |
| ENSG00000135437 | -1.249252 | -0.666575 | 0.442579 | 1 RDH5           | K00061 |
| ENSG00000157992 | -1.249252 | -0.666575 | 0.442579 | 1 KRTCAP3        | -      |
| ENSG00000169403 | -1.249252 | -0.666575 | 0.442579 | 1 PTAFR          | K04279 |
| ENSG00000176054 | -1.249252 | -0.666575 | 0.442579 | 1 RPL23P2        | K02894 |
| ENSG00000176681 | -1.249252 | -0.666575 | 0.442579 | 1 LRRC37A        | K04613 |
| ENSG00000184730 | -1.249252 | -0.666575 | 0.442579 | 1 APOBR          | -      |
| ENSG00000189221 | -1.249252 | -0.666575 | 0.442579 | 1 MAOA           | K00274 |
| ENSG00000197620 | -1.249252 | -0.666575 | 0.442579 | 1 CXorf40A       | -      |
| ENSG00000204771 | -1.249252 | -0.666575 | 0.442579 | 1 CTD-3232M19.2  | -      |
| ENSG00000213976 | -1.249252 | -0.666575 | 0.442579 | 1 CTD-2561J22.2  | K09228 |
| ENSG00000220157 | -1.249252 | -0.666575 | 0.442579 | 1 HNRNPA1P12     | K12741 |
| ENSG00000225783 | -1.249252 | -0.666575 | 0.442579 | 1 MIAT           | -      |
| ENSG00000235385 | -1.249252 | -0.666575 | 0.442579 | 1 GS1-600G8.5    | -      |
| ENSG00000237074 | -1.249252 | -0.666575 | 0.442579 | 1 RP11-6J21.2    | -      |
| ENSG00000243406 | -1.249252 | -0.666575 | 0.442579 | 1 MRPS31P5       | K17410 |
| ENSG00000245156 | -1.249252 | -0.666575 | 0.442579 | 1 RP11-867G23.3  | -      |
| ENSG00000253341 | -1.249252 | -0.666575 | 0.442579 | 1 RP11-730G20.2  | K13162 |
| ENSG00000256950 | -1.249252 | -0.666575 | 0.442579 | 1 RP11-87C12.2   | K06693 |
| ENSG00000258790 | -1.249252 | -0.666575 | 0.442579 | 1 KIAA0391       | K17655 |
| ENSG00000259845 | -1.249252 | -0.666575 | 0.442579 | 1 HERC2P10       | K10595 |
| ENSG00000260591 | -1.249252 | -0.666575 | 0.442579 | 1 RP11-817O13.6  | -      |
| ENSG00000260682 | -1.249252 | -0.666575 | 0.442579 | 1 7SK            | -      |
| ENSG00000260920 | -1.249252 | -0.666575 | 0.442579 | 1 RP1-228H13.5   | -      |
| ENSG00000263874 | -1.249252 | -0.666575 | 0.442579 | 1 LINC00672      | -      |
| ENSG00000269815 | -1.249252 | -0.666575 | 0.442579 | 1 CTD-2278I10.4  | -      |
| ENSG00000270589 | -1.249252 | -0.666575 | 0.442579 | 1 RP11-348N5.7   | -      |
| ENSG00000271769 | -1.249252 | -0.666575 | 0.442579 | 1 RP11-216P16.2  | -      |
| ENSG00000272769 | -1.249252 | -0.666575 | 0.442579 | 1 RP11-725P16.2  | -      |
| ENSG00000272788 | -1.249252 | -0.666575 | 0.442579 | 1 RP11-674N23.4  | -      |
| ENSG00000273338 | -1.249252 | -0.666575 | 0.442579 | 1 RP11-386I14.4  | -      |
| ENSG00000073067 | 1.014574  | -0.790856 | 0.442579 | 1 CYP2W1         | K07423 |
| ENSG00000080644 | 1.014574  | -0.790856 | 0.442579 | 1 CHRNA3         | K04805 |
| ENSG00000081181 | 1.014574  | -0.790856 | 0.442579 | 1 ARG2           | K01476 |
| ENSG00000134042 | 1.014574  | -0.790856 | 0.442579 | 1 MRO            | -      |
| ENSG00000139329 | 1.014574  | -0.790856 | 0.442579 | 1 LUM            | K08122 |
| ENSG00000159712 | 1.014574  | -0.790856 | 0.442579 | 1 ANKRD18CP      | K17299 |
| ENSG00000166482 | 1.014574  | -0.790856 | 0.442579 | 1 MFAP4          | -      |
| ENSG00000184544 | 1.014574  | -0.790856 | 0.442579 | 1 DHRS7C         | K11167 |
| ENSG00000185101 | 1.014574  | -0.790856 | 0.442579 | 1 ANO9           | K19503 |
| ENSG00000186684 | 1.014574  | -0.790856 | 0.442579 | 1 CYP27C1        | K17951 |
| ENSG00000187260 | 1.014574  | -0.790856 | 0.442579 | 1 WDR86          | -      |
| ENSG00000213906 | 1.014574  | -0.790856 | 0.442579 | 1 LTB4R2         | K04297 |

|                 |           |           |          |                    |        |
|-----------------|-----------|-----------|----------|--------------------|--------|
| ENSG00000226029 | 1.014574  | -0.790856 | 0.442579 | 1 RP4-798A10.2     | -      |
| ENSG00000228492 | 1.014574  | -0.790856 | 0.442579 | 1 RAB11FIP1P1      | K12484 |
| ENSG00000240668 | 1.014574  | -0.790856 | 0.442579 | 1 KRT8P36          | K07605 |
| ENSG00000249715 | 1.014574  | -0.790856 | 0.442579 | 1 FER1L5           | K02927 |
| ENSG00000251994 | 1.014574  | -0.790856 | 0.442579 | 1 RNU2-27P         | -      |
| ENSG00000255729 | 1.014574  | -0.790856 | 0.442579 | 1 AC005618.1       | -      |
| ENSG00000255769 | 1.014574  | -0.790856 | 0.442579 | 1 RP11-152F13.3    | K08622 |
| ENSG00000258759 | 1.014574  | -0.790856 | 0.442579 | 1 RP11-1012A1.7    | K09529 |
| ENSG00000260495 | 1.014574  | -0.790856 | 0.442579 | 1 RP11-55K13.1     | -      |
| ENSG00000260808 | 1.014574  | -0.790856 | 0.442579 | 1 CTD-2007L18.5    | -      |
| ENSG00000261713 | 1.014574  | -0.790856 | 0.442579 | 1 SSTR5-AS1        | -      |
| ENSG00000266507 | 1.014574  | -0.790856 | 0.442579 | 1 MIR4479          | -      |
| ENSG00000267141 | 1.014574  | -0.790856 | 0.442579 | 1 CTB-31O20.8      | -      |
| ENSG00000272482 | 1.014574  | -0.790856 | 0.442579 | 1 RP11-474O21.5    | -      |
| ENSG00000272896 | 1.014574  | -0.790856 | 0.442579 | 1 RP11-216L13.17   | -      |
| ENSG00000273343 | 1.014574  | -0.790856 | 0.442579 | 1 XXbac-B444P24.13 | -      |
| ENSG00000183929 | 0.634443  | 1.543356  | 0.442635 | 1 DUSP5P1          | K04459 |
| ENSG00000112294 | -0.621798 | 1.612621  | 0.442635 | 1 ALDH5A1          | K00139 |
| ENSG00000101400 | 0.511372  | 5.04818   | 0.44277  | 1 SNTA1            | -      |
| ENSG00000198604 | -0.509161 | 5.987328  | 0.443229 | 1 BAZ1A            | K11655 |
| ENSG00000185269 | 0.577985  | 2.067146  | 0.443513 | 1 NOTUM            | -      |
| ENSG00000175792 | -0.504662 | 7.04488   | 0.443567 | 1 RUVBL1           | K04499 |
| ENSG00000198000 | -0.506354 | 6.370864  | 0.443737 | 1 NOL8             | -      |
| ENSG00000188818 | 0.520421  | 4.383377  | 0.443772 | 1 ZDHHC11          | K18932 |
| ENSG00000048162 | -0.50693  | 6.071719  | 0.443803 | 1 NOP16            | -      |
| ENSG00000162384 | -0.517938 | 4.213265  | 0.44387  | 1 C1orf123         | -      |
| ENSG00000054654 | 0.505956  | 6.131446  | 0.443879 | 1 SYNE2            | K19346 |
| ENSG00000104427 | -0.522665 | 4.002775  | 0.443994 | 1 ZC2HC1A          | -      |
| ENSG00000226381 | -0.683529 | 1.218259  | 0.444231 | 1 RP11-119F19.2    | -      |
| ENSG00000236360 | -0.683529 | 1.218259  | 0.444231 | 1 RP11-334A14.2    | K07830 |
| ENSG00000235231 | 0.672957  | 1.130437  | 0.444231 | 1 AP000351.10      | K10028 |
| ENSG00000232233 | -0.649716 | 1.197032  | 0.444231 | 1 RP11-573D15.2    | -      |
| ENSG00000203761 | 0.620808  | 1.153537  | 0.444231 | 1 MSTO2P           | -      |
| ENSG00000140406 | -0.518903 | 4.618016  | 0.444307 | 1 MESDC1           | -      |
| ENSG00000116191 | -0.512963 | 5.152465  | 0.444342 | 1 RALGPS2          | -      |
| ENSG00000105865 | -0.531227 | 3.938642  | 0.444551 | 1 DUS4L            | K05545 |
| ENSG00000160948 | -0.526364 | 3.93573   | 0.444551 | 1 VPS28            | K12184 |
| ENSG00000002549 | -0.509902 | 5.480132  | 0.444596 | 1 LAP3             | K11142 |
| ENSG00000272325 | -0.510377 | 5.289675  | 0.444624 | 1 NUDT3            | K07766 |
| ENSG00000165506 | -0.508628 | 5.14382   | 0.4448   | 1 DNAAF2           | K19751 |
| ENSG00000120992 | -0.502211 | 7.432259  | 0.445168 | 1 LYPLA1           | K06128 |
| ENSG00000008405 | -0.508381 | 5.5453    | 0.445205 | 1 CRY1             | K02295 |
| ENSG00000119729 | 0.50341   | 6.608625  | 0.445247 | 1 RHOQ             | K07194 |
| ENSG00000139146 | -0.502099 | 7.414672  | 0.445293 | 1 FAM60A           | -      |
| ENSG00000104998 | -0.510295 | 4.949328  | 0.445321 | 1 IL27RA           | K19598 |
| ENSG00000094631 | -0.812766 | 0.672515  | 0.445397 | 1 HDAC6            | K11407 |
| ENSG00000254719 | -0.812766 | 0.672515  | 0.445397 | 1 RP11-351I24.3    | K04545 |
| ENSG00000087303 | -0.762437 | 0.640598  | 0.445397 | 1 NID2             | K06826 |
| ENSG00000224699 | 0.752973  | 0.552303  | 0.445397 | 1 LAMTOR5-AS1      | -      |
| ENSG00000129749 | 0.671297  | 0.587699  | 0.445397 | 1 CHRNA10          | K04811 |
| ENSG00000144214 | 0.671297  | 0.587699  | 0.445397 | 1 LYG1             | -      |
| ENSG00000233175 | 0.671297  | 0.587699  | 0.445397 | 1 CTD-2020K17.3    | -      |
| ENSG00000251257 | 0.671297  | 0.587699  | 0.445397 | 1 CTD-2263F21.1    | -      |
| ENSG00000268030 | 0.671297  | 0.587699  | 0.445397 | 1 AC005253.2       | -      |
| ENSG00000272808 | 0.671297  | 0.587699  | 0.445397 | 1 RP11-66B24.7     | -      |
| ENSG00000164077 | -0.553709 | 3.183002  | 0.445448 | 1 MON1A            | K01557 |
| ENSG00000183718 | 0.531451  | 3.578532  | 0.445569 | 1 TRIM52           | K12025 |
| ENSG00000224259 | -0.521409 | 4.401104  | 0.44564  | 1 LINC01133        | -      |

|                 |           |          |          |                  |        |
|-----------------|-----------|----------|----------|------------------|--------|
| ENSG00000188312 | 0.530874  | 3.419387 | 0.445834 | 1 CENPP          | K11508 |
| ENSG00000148690 | -0.510645 | 4.963424 | 0.446062 | 1 FRA10AC1       | K13121 |
| ENSG00000153291 | -0.520241 | 4.118175 | 0.446195 | 1 SLC25A27       | K15112 |
| ENSG00000196155 | -0.515894 | 4.467863 | 0.446234 | 1 PLEKHG4        | -      |
| ENSG00000075131 | -0.513433 | 4.504948 | 0.446511 | 1 TIPIN          | K10904 |
| ENSG00000079950 | -0.508239 | 4.869232 | 0.446542 | 1 STX7           | K08488 |
| ENSG00000173621 | -0.501351 | 6.813959 | 0.447003 | 1 LRFN4          | K16357 |
| ENSG00000064012 | -0.508788 | 5.149996 | 0.447028 | 1 CASP8          | K04398 |
| ENSG00000024422 | 0.50049   | 6.999597 | 0.447141 | 1 EHD2           | K12469 |
| ENSG00000135407 | 0.607648  | 1.452617 | 0.447595 | 1 AVIL           | K08017 |
| ENSG00000261254 | 0.607648  | 1.452617 | 0.447595 | 1 RP4-714D9.5    | -      |
| ENSG00000130522 | -0.500441 | 6.865905 | 0.447719 | 1 JUND           | K04449 |
| ENSG00000183665 | -0.528381 | 3.68988  | 0.447862 | 1 TRMT12         | K07055 |
| ENSG00000181467 | -0.505084 | 5.593222 | 0.448433 | 1 RAP2B          | K07838 |
| ENSG00000111666 | -0.503547 | 5.592316 | 0.448433 | 1 CHPT1          | K00994 |
| ENSG00000187742 | -0.511096 | 4.541104 | 0.448467 | 1 SECISBP2       | K19539 |
| ENSG00000139131 | -0.50296  | 5.622829 | 0.448642 | 1 YARS2          | K01866 |
| ENSG00000076201 | 0.507746  | 4.789954 | 0.448718 | 1 PTPN23         | K18040 |
| ENSG00000143669 | 0.51457   | 4.008035 | 0.448855 | 1 LYST           | -      |
| ENSG00000117862 | -0.498355 | 7.070198 | 0.449222 | 1 TXNDC12        | K05360 |
| ENSG00000140400 | -0.504643 | 5.218584 | 0.449623 | 1 MAN2C1         | K01191 |
| ENSG00000126814 | -0.509716 | 4.722792 | 0.449638 | 1 TRMT5          | K15429 |
| ENSG00000128573 | -0.559854 | 2.358445 | 0.449714 | 1 FOXP2          | K09409 |
| ENSG00000178977 | 0.59879   | 1.700729 | 0.449741 | 1 LINC00324      | -      |
| ENSG00000243716 | 0.518322  | 3.761468 | 0.449889 | 1 NPIP5          | K08873 |
| ENSG00000173334 | -0.501955 | 5.859028 | 0.450122 | 1 TRIB1          | K08814 |
| ENSG00000075945 | -0.507032 | 5.161043 | 0.450341 | 1 KIFAP3         | -      |
| ENSG00000185088 | -0.497861 | 6.663254 | 0.450497 | 1 RPS27L         | K02978 |
| ENSG00000175745 | -0.505054 | 5.482091 | 0.450659 | 1 NR2F1          | K08547 |
| ENSG00000270172 | -0.535912 | 2.991889 | 0.450668 | 1 RP5-1024G6.8   | -      |
| ENSG00000272579 | -0.535912 | 2.991889 | 0.450668 | 1 RP11-101E13.5  | -      |
| ENSG00000173706 | 0.49563   | 7.649046 | 0.450685 | 1 HEG1           | -      |
| ENSG00000146856 | 0.639473  | 1.00929  | 0.450687 | 1 AGL3           | -      |
| ENSG00000185504 | -0.505679 | 4.953558 | 0.450959 | 1 C17orf70       | K10993 |
| ENSG00000163743 | -0.513014 | 3.983427 | 0.45102  | 1 RCHY1          | K10144 |
| ENSG00000164163 | -0.496845 | 6.349586 | 0.451096 | 1 ABCE1          | K06174 |
| ENSG00000232445 | -0.536478 | 3.072305 | 0.45117  | 1 RP11-132A1.4   | -      |
| ENSG00000127954 | 0.495667  | 6.999233 | 0.451519 | 1 STEAP4         | K16467 |
| ENSG00000198890 | -0.510903 | 4.656665 | 0.451525 | 1 PRMT6          | K11437 |
| ENSG00000182700 | 0.523684  | 3.144702 | 0.451611 | 1 IGIP           | -      |
| ENSG00000164764 | -0.556595 | 2.733388 | 0.451945 | 1 SBSPON         | K16467 |
| ENSG00000133243 | -0.495238 | 6.498333 | 0.452247 | 1 BTBD2          | K10477 |
| ENSG00000152620 | -0.495377 | 6.881225 | 0.452283 | 1 NADK2          | K00858 |
| ENSG00000248835 | 0.587621  | 2.097669 | 0.452285 | 1 AL357673.1     | K12581 |
| ENSG00000223509 | -0.579833 | 2.137088 | 0.452285 | 1 RP11-632K20.7  | -      |
| ENSG00000143156 | -0.509409 | 4.473745 | 0.452318 | 1 NME7           | K00940 |
| ENSG00000196923 | -0.495988 | 6.608261 | 0.452329 | 1 PDLIM7         | -      |
| ENSG00000153162 | 0.495183  | 6.672905 | 0.452566 | 1 BMP6           | K16620 |
| ENSG00000117602 | -0.514686 | 3.84099  | 0.452929 | 1 RCAN3          | K17905 |
| ENSG00000134056 | -0.514686 | 3.84099  | 0.452929 | 1 MRPS36         | K17414 |
| ENSG00000173209 | -0.49827  | 5.823158 | 0.452991 | 1 AHSA2          | -      |
| ENSG00000131844 | -0.497211 | 6.223503 | 0.453022 | 1 MCCC2          | K01969 |
| ENSG00000172000 | 0.523628  | 3.020446 | 0.45328  | 1 ZNF556         | K09228 |
| ENSG00000176371 | 0.523628  | 3.020446 | 0.45328  | 1 ZSCAN2         | K09488 |
| ENSG00000242588 | 0.621185  | 1.33623  | 0.453309 | 1 RP11-274B21.1  | K08864 |
| ENSG00000254996 | 0.621185  | 1.33623  | 0.453309 | 1 ANKHD1-EIF4EBP | K16726 |
| ENSG00000259802 | 0.621185  | 1.33623  | 0.453309 | 1 CTD-2256P15.2  | -      |
| ENSG00000104946 | 0.503956  | 4.791556 | 0.453578 | 1 TBC1D17        | -      |

|                 |           |          |          |                  |        |
|-----------------|-----------|----------|----------|------------------|--------|
| ENSG00000164548 | -0.496447 | 6.081466 | 0.453601 | 1 TRA2A          | K12897 |
| ENSG00000272269 | -0.545426 | 3.128726 | 0.453613 | 1 RP11-500C11.3  | -      |
| ENSG00000117308 | -0.49989  | 5.192487 | 0.453688 | 1 GALE           | K01784 |
| ENSG00000185630 | -0.501123 | 5.031884 | 0.453718 | 1 PBX1           | -      |
| ENSG00000115946 | -0.499135 | 5.549046 | 0.453909 | 1 PNO1           | K11884 |
| ENSG00000130779 | 0.492779  | 7.129871 | 0.453946 | 1 CLIP1          | K10421 |
| ENSG00000131788 | 0.809061  | 0.32812  | 0.454082 | 1 PIAS3          | K16064 |
| ENSG00000144285 | 0.809061  | 0.32812  | 0.454082 | 1 SCN1A          | K04833 |
| ENSG00000232628 | 0.809061  | 0.32812  | 0.454082 | 1 RP11-365O16.3  | -      |
| ENSG00000272853 | 0.809061  | 0.32812  | 0.454082 | 1 RP11-398C13.6  | -      |
| ENSG00000147650 | -0.732038 | 0.453823 | 0.454082 | 1 LRP12          | K12581 |
| ENSG00000228519 | -0.732038 | 0.453823 | 0.454082 | 1 RP11-298C3.2   | K15306 |
| ENSG00000270175 | -0.732038 | 0.453823 | 0.454082 | 1 RP11-793H13.11 | -      |
| ENSG00000105270 | 0.710667  | 0.369847 | 0.454082 | 1 CLIP3          | K10423 |
| ENSG00000205744 | 0.710667  | 0.369847 | 0.454082 | 1 DENND1C        | -      |
| ENSG00000227630 | 0.710667  | 0.369847 | 0.454082 | 1 LINC01132      | -      |
| ENSG00000250896 | 0.710667  | 0.369847 | 0.454082 | 1 RNPS1P1        | K14325 |
| ENSG00000254416 | 0.710667  | 0.369847 | 0.454082 | 1 RP11-347E10.1  | -      |
| ENSG00000261542 | 0.710667  | 0.369847 | 0.454082 | 1 RP11-16E18.3   | -      |
| ENSG00000272198 | 0.710667  | 0.369847 | 0.454082 | 1 RP11-309G3.3   | -      |
| ENSG00000004399 | 0.492405  | 7.248798 | 0.454114 | 1 PLXND1         | K06822 |
| ENSG00000033867 | -0.495703 | 5.747802 | 0.454138 | 1 SLC4A7         | K13858 |
| ENSG00000161888 | 0.497166  | 5.770729 | 0.45422  | 1 SPC24          | K11549 |
| ENSG00000064490 | -0.49861  | 5.434314 | 0.454433 | 1 RFXANK         | K08062 |
| ENSG00000205981 | -0.49861  | 5.434314 | 0.454433 | 1 DNAJC19        | K09539 |
| ENSG00000152642 | -0.502932 | 5.090862 | 0.454474 | 1 GPD1L          | K00006 |
| ENSG00000136875 | -0.495143 | 6.163728 | 0.454687 | 1 PRPF4          | K12662 |
| ENSG00000128266 | 0.60931   | 1.603217 | 0.454799 | 1 GNAZ           | -      |
| ENSG00000168453 | 0.492065  | 6.785953 | 0.455185 | 1 HR             | K00478 |
| ENSG00000267575 | -0.535274 | 2.906702 | 0.455261 | 1 CTC-459F4.3    | -      |
| ENSG00000115827 | -0.516754 | 3.682914 | 0.455268 | 1 DCAF17         | -      |
| ENSG00000138641 | 0.514374  | 3.671324 | 0.455268 | 1 HERC3          | K10614 |
| ENSG00000184792 | -0.494485 | 6.086631 | 0.455337 | 1 OSBP2          | -      |
| ENSG00000164758 | -0.504992 | 4.653162 | 0.455354 | 1 MED30          | K15143 |
| ENSG00000112996 | -0.490185 | 7.911595 | 0.455548 | 1 MRPS30         | K17409 |
| ENSG00000137038 | -0.498777 | 5.585043 | 0.455644 | 1 TMEM261        | -      |
| ENSG00000107862 | 0.493742  | 6.248777 | 0.455679 | 1 GBF1           | K18443 |
| ENSG00000169220 | 0.527259  | 3.073437 | 0.455718 | 1 RGS14          | K17706 |
| ENSG00000253683 | -0.608375 | 1.875361 | 0.455728 | 1 CTB-79E8.3     | K07604 |
| ENSG00000273108 | -0.587365 | 1.862338 | 0.455728 | 1 RP11-416N2.4   | -      |
| ENSG00000152952 | 0.489055  | 8.634834 | 0.455939 | 1 PLOD2          | K13645 |
| ENSG00000169439 | -0.491595 | 6.741831 | 0.456026 | 1 SDC2           | K16336 |
| ENSG00000160271 | 0.498439  | 5.011892 | 0.456063 | 1 RALGDS         | K08732 |
| ENSG00000105755 | -0.495097 | 5.609451 | 0.456091 | 1 ETHE1          | K17725 |
| ENSG00000070778 | -0.530658 | 3.329283 | 0.456207 | 1 PTPN21         | K18025 |
| ENSG00000137547 | -0.493035 | 6.414132 | 0.456208 | 1 MRPL15         | K02876 |
| ENSG00000132436 | -0.498536 | 5.326118 | 0.456537 | 1 FIGNL1         | K12196 |
| ENSG00000181524 | 0.513767  | 3.586142 | 0.456645 | 1 RPL24P4        | K02896 |
| ENSG00000182973 | -0.494623 | 5.417005 | 0.456656 | 1 CNOT10         | K12607 |
| ENSG00000198466 | 0.502822  | 4.461362 | 0.456669 | 1 ZNF587         | K09228 |
| ENSG00000126217 | 0.49096   | 6.44769  | 0.456711 | 1 MCF2L          | -      |
| ENSG00000162702 | -0.492872 | 5.816192 | 0.456759 | 1 ZNF281         | -      |
| ENSG00000145029 | -0.561267 | 2.223748 | 0.456779 | 1 NICN1          | K16607 |
| ENSG00000104907 | -0.49005  | 7.050894 | 0.456826 | 1 TRMT1          | K00555 |
| ENSG00000188486 | -0.4906   | 6.751208 | 0.456915 | 1 H2AFX          | K11251 |
| ENSG00000143224 | -0.509351 | 4.021632 | 0.457162 | 1 PPOX           | K00231 |
| ENSG00000222011 | -0.558335 | 2.520358 | 0.457328 | 1 FAM185A        | -      |
| ENSG00000139182 | 0.491897  | 5.719091 | 0.457381 | 1 CLSTN3         | -      |

|                 |           |          |          |                 |        |
|-----------------|-----------|----------|----------|-----------------|--------|
| ENSG00000179950 | 0.504636  | 4.338586 | 0.457455 | 1 PUF60         | K12838 |
| ENSG00000213923 | 0.487783  | 8.043207 | 0.457497 | 1 CSNK1E        | K08960 |
| ENSG00000163659 | -0.490878 | 6.158234 | 0.457675 | 1 TIPARP        | K15259 |
| ENSG00000100364 | 0.488876  | 6.946367 | 0.457815 | 1 KIAA0930      | -      |
| ENSG00000160124 | -0.493423 | 5.285176 | 0.457976 | 1 CCDC58        | K16741 |
| ENSG00000218283 | 0.489351  | 6.600446 | 0.458049 | 1 MORF4L1P1     | K11339 |
| ENSG00000185567 | 0.48753   | 7.588175 | 0.45816  | 1 AHNAK2        | -      |
| ENSG00000196843 | 0.505647  | 3.894572 | 0.458325 | 1 ARID5A        | -      |
| ENSG00000168970 | -0.722021 | 0.90035  | 0.45842  | 1 JMJD7-PLA2G4B | K16342 |
| ENSG00000198576 | -0.722021 | 0.90035  | 0.45842  | 1 ARC           | K15867 |
| ENSG00000120278 | 0.662847  | 0.849152 | 0.45842  | 1 PLEKHG1       | -      |
| ENSG00000252645 | 0.662847  | 0.849152 | 0.45842  | 1 RNU7-111P     | -      |
| ENSG00000142634 | 0.487499  | 7.284457 | 0.458561 | 1 EFHD2         | -      |
| ENSG00000064932 | 0.487166  | 7.394611 | 0.458723 | 1 SBNO2         | -      |
| ENSG00000156162 | -0.490794 | 5.49282  | 0.45935  | 1 DPY19L4       | -      |
| ENSG00000167552 | 0.497524  | 4.232784 | 0.459416 | 1 TUBA1A        | K07374 |
| ENSG00000064933 | -0.495548 | 4.933619 | 0.459734 | 1 PMS1          | K10864 |
| ENSG00000226137 | -0.512287 | 3.481879 | 0.459908 | 1 BAIAP2-AS1    | -      |
| ENSG00000106526 | 0.637339  | 1.209696 | 0.459963 | 1 ACTR3C        | K18584 |
| ENSG00000197409 | 0.637339  | 1.209696 | 0.459963 | 1 HIST1H3D      | K11253 |
| ENSG00000232060 | 0.637339  | 1.209696 | 0.459963 | 1 RP11-255N24.4 | -      |
| ENSG00000163354 | -0.610298 | 1.270272 | 0.459963 | 1 DCST2         | -      |
| ENSG00000141562 | 0.488418  | 6.272837 | 0.460264 | 1 NARF          | -      |
| ENSG00000113845 | -0.4869   | 6.743074 | 0.460327 | 1 TIMMDC1       | -      |
| ENSG00000188917 | -0.502506 | 4.227229 | 0.460463 | 1 TRMT2B        | K15331 |
| ENSG00000271576 | 0.621478  | 1.498672 | 0.460565 | 1 RP11-486G15.2 | -      |
| ENSG00000116406 | -0.499221 | 4.740866 | 0.46063  | 1 EDEM3         | K10086 |
| ENSG00000162009 | 0.538904  | 2.281632 | 0.460755 | 1 SSTR5         | K04221 |
| ENSG00000135899 | -0.566984 | 1.78666  | 0.460787 | 1 SP110         | -      |
| ENSG00000183496 | -0.566984 | 1.78666  | 0.460787 | 1 MEX3B         | K15686 |
| ENSG00000148290 | -0.544765 | 2.16544  | 0.460817 | 1 SURF1         | K14998 |
| ENSG00000224420 | -0.544765 | 2.16544  | 0.460817 | 1 ADM5          | -      |
| ENSG00000117620 | -0.486452 | 6.681741 | 0.460876 | 1 SLC35A3       | K15272 |
| ENSG00000135778 | -0.491935 | 5.29524  | 0.460966 | 1 NTPCR         | K06928 |
| ENSG00000026103 | -0.493989 | 4.89     | 0.461088 | 1 FAS           | K04390 |
| ENSG00000125772 | 0.487757  | 5.643727 | 0.461216 | 1 GPCPD1        | K18695 |
| ENSG00000124532 | -0.488708 | 5.992185 | 0.46126  | 1 MRS2          | K16075 |
| ENSG00000069399 | 0.489701  | 5.518922 | 0.461457 | 1 BCL3          | K09258 |
| ENSG00000153714 | 0.502823  | 4.155952 | 0.461618 | 1 LURAP1L       | -      |
| ENSG00000108561 | -0.48289  | 8.767686 | 0.461626 | 1 C1QBP         | K15414 |
| ENSG00000151502 | 0.491948  | 5.074548 | 0.461928 | 1 VPS26B        | K18466 |
| ENSG00000182134 | 0.509051  | 3.217582 | 0.462139 | 1 TDRKH         | K18406 |
| ENSG00000122912 | 0.506269  | 3.777731 | 0.462487 | 1 SLC25A16      | K15084 |
| ENSG00000236287 | -0.484234 | 6.821008 | 0.462613 | 1 ZBED5         | -      |
| ENSG00000163138 | -0.516824 | 2.980364 | 0.462737 | 1 PACRGL        | K10408 |
| ENSG00000122483 | -0.489878 | 5.336979 | 0.46283  | 1 CCDC18        | K14825 |
| ENSG00000112033 | 0.501902  | 4.095565 | 0.462871 | 1 PPARD         | K04504 |
| ENSG00000125875 | 0.494384  | 4.926325 | 0.462934 | 1 TBC1D20       | K17985 |
| ENSG00000242539 | -0.535044 | 2.877145 | 0.462981 | 1 AC007620.3    | -      |
| ENSG00000100209 | -0.493759 | 4.405057 | 0.463011 | 1 HSCB          | K04082 |
| ENSG00000173846 | -0.50609  | 3.497379 | 0.463328 | 1 PLK3          | K08862 |
| ENSG00000174791 | -0.484607 | 5.921032 | 0.463665 | 1 RIN1          | K17638 |
| ENSG00000205403 | 0.498009  | 4.123597 | 0.463909 | 1 CFI           | K01333 |
| ENSG00000032389 | -0.492773 | 4.637362 | 0.463928 | 1 TSSC1         | -      |
| ENSG00000100307 | 0.494506  | 4.035293 | 0.464235 | 1 CBX7          | K11454 |
| ENSG00000245937 | -0.51308  | 3.206109 | 0.464307 | 1 CTC-228N24.3  | -      |
| ENSG00000104524 | -0.490484 | 5.045176 | 0.46439  | 1 PYCRL         | K00286 |
| ENSG00000213123 | -0.528166 | 3.118293 | 0.464616 | 1 TCTEX1D2      | -      |



|                 |           |          |          |                 |        |
|-----------------|-----------|----------|----------|-----------------|--------|
| ENSG00000087903 | 0.507743  | 3.099713 | 0.464616 | 1 RFX2          | K09173 |
| ENSG00000168291 | -0.482301 | 6.63497  | 0.464812 | 1 PDHB          | K00162 |
| ENSG00000185641 | 0.487247  | 5.320942 | 0.464824 | 1 CTD-2287O16.1 | K02975 |
| ENSG00000163029 | -0.487429 | 5.407755 | 0.464937 | 1 SMC6          | K02159 |
| ENSG00000137871 | -0.489529 | 4.901746 | 0.464993 | 1 ZNF280D       | -      |
| ENSG00000172803 | -0.949783 | 0.178499 | 0.465039 | 1 SNX32         | K17920 |
| ENSG00000240399 | -0.949783 | 0.178499 | 0.465039 | 1 RP1-228P16.1  | K02922 |
| ENSG00000241057 | -0.949783 | 0.178499 | 0.465039 | 1 AC004985.12   | K17630 |
| ENSG00000162645 | 0.767521  | 0.113659 | 0.465039 | 1 GBP2          | -      |
| ENSG00000221539 | 0.767521  | 0.113659 | 0.465039 | 1 SNORD99       | -      |
| ENSG00000265399 | 0.767521  | 0.113659 | 0.465039 | 1 RP13-270P17.2 | -      |
| ENSG00000272990 | 0.767521  | 0.113659 | 0.465039 | 1 RP11-305K5.1  | -      |
| ENSG00000166479 | -0.486027 | 5.494763 | 0.46543  | 1 TMX3          | K09585 |
| ENSG00000087253 | -0.50054  | 4.029607 | 0.465504 | 1 LPCAT2        | K13510 |
| ENSG00000113739 | -0.4841   | 5.328287 | 0.465789 | 1 STC2          | -      |
| ENSG00000198873 | 0.485636  | 5.214886 | 0.465822 | 1 GRK5          | K08291 |
| ENSG00000172893 | -0.489852 | 5.138828 | 0.466249 | 1 DHCR7         | K00213 |
| ENSG00000101412 | 0.480744  | 6.32638  | 0.466314 | 1 E2F1          | K17454 |
| ENSG00000162572 | -0.617927 | 1.68297  | 0.466499 | 1 SCNN1D        | K04826 |
| ENSG00000073711 | -0.520383 | 3.162866 | 0.466581 | 1 PPP2R3A       | K11583 |
| ENSG00000108375 | -0.520383 | 3.162866 | 0.466581 | 1 RNF43         | K15694 |
| ENSG00000225830 | -0.491226 | 5.006217 | 0.46699  | 1 ERCC6         | K10841 |
| ENSG00000124067 | 0.483493  | 5.436072 | 0.467055 | 1 SLC12A4       | K14427 |
| ENSG00000135272 | -0.483865 | 5.32283  | 0.467287 | 1 MDFIC         | -      |
| ENSG00000141298 | 0.485122  | 5.036236 | 0.467378 | 1 SSH2          | K05766 |
| ENSG00000132423 | -0.494868 | 4.435729 | 0.467435 | 1 COQ3          | K00591 |
| ENSG00000101311 | -0.497761 | 4.079639 | 0.467573 | 1 FERMT1        | K17082 |
| ENSG00000210082 | 0.475482  | 14.00351 | 0.467738 | 1 MT-RNR2       | -      |
| ENSG00000186026 | -0.694339 | 1.119961 | 0.467814 | 1 ZNF284        | K09228 |
| ENSG00000259976 | -0.694339 | 1.119961 | 0.467814 | 1 RP11-553L6.5  | -      |
| ENSG00000167065 | 0.656952  | 1.071081 | 0.467814 | 1 DUSP18        | K14165 |
| ENSG00000225760 | -0.693097 | 0.74683  | 0.467852 | 1 LINC00431     | -      |
| ENSG00000230002 | -0.693097 | 0.74683  | 0.467852 | 1 ALMS1-IT1     | -      |
| ENSG00000242338 | -0.693097 | 0.74683  | 0.467852 | 1 BMS1P4        | K14569 |
| ENSG00000254860 | -0.693097 | 0.74683  | 0.467852 | 1 TMEM9B-AS1    | -      |
| ENSG00000258704 | -0.693097 | 0.74683  | 0.467852 | 1 RP11-85K15.2  | -      |
| ENSG00000125618 | 0.692974  | 0.669195 | 0.467852 | 1 PAX8          | K09293 |
| ENSG00000186765 | 0.692974  | 0.669195 | 0.467852 | 1 FSCN2         | K17455 |
| ENSG00000226823 | 0.692974  | 0.669195 | 0.467852 | 1 SUGT1P        | K12795 |
| ENSG00000254389 | 0.692974  | 0.669195 | 0.467852 | 1 RHPN1-AS1     | -      |
| ENSG00000214357 | 0.497988  | 4.024499 | 0.467852 | 1 NEURL1B       | K01931 |
| ENSG00000259479 | -0.507475 | 3.293531 | 0.467932 | 1 CTD-2008A1.2  | K00008 |
| ENSG00000065989 | 0.483211  | 5.127071 | 0.467959 | 1 PDE4A         | K13293 |
| ENSG00000125877 | -0.482377 | 5.409813 | 0.468172 | 1 ITPA          | K01519 |
| ENSG00000172732 | -0.485251 | 5.355266 | 0.468537 | 1 MUS81         | K08991 |
| ENSG00000173120 | 0.481302  | 5.810412 | 0.468615 | 1 KDM2A         | K10276 |
| ENSG00000112319 | 0.481559  | 5.697223 | 0.468675 | 1 EYA4          | K17622 |
| ENSG00000128791 | -0.4855   | 5.318451 | 0.468796 | 1 TWSG1         | K17985 |
| ENSG00000027001 | -0.4918   | 4.352441 | 0.468936 | 1 MIPEP         | K01410 |
| ENSG00000139921 | -0.480339 | 5.932549 | 0.46911  | 1 TMX1          | -      |
| ENSG00000234160 | -0.561804 | 2.175878 | 0.469114 | 1 RP11-613M10.6 | -      |
| ENSG00000188153 | 0.477535  | 6.509741 | 0.469494 | 1 COL4A5        | K06237 |
| ENSG00000099364 | -0.483306 | 5.22325  | 0.469506 | 1 FBXL19        | K10285 |
| ENSG00000261088 | -0.508659 | 3.33757  | 0.469589 | 1 RP11-61A14.3  | -      |
| ENSG00000163697 | -0.482575 | 4.854093 | 0.469974 | 1 APBB2         | K04530 |
| ENSG00000253293 | -0.50663  | 3.516655 | 0.470055 | 1 HOXA10        | K17443 |
| ENSG00000056277 | -0.563672 | 2.021839 | 0.47017  | 1 ZNF280C       | -      |
| ENSG00000169684 | -0.500965 | 4.042954 | 0.470182 | 1 CHRNA5        | K04807 |

|                 |           |          |          |                 |        |
|-----------------|-----------|----------|----------|-----------------|--------|
| ENSG00000152104 | 0.477447  | 6.028755 | 0.470211 | 1 PTPN14        | K18025 |
| ENSG00000226360 | 0.521582  | 2.925549 | 0.470264 | 1 RPL10AP6      | K02865 |
| ENSG00000178425 | -0.484043 | 5.194856 | 0.470265 | 1 NT5DC1        | K01794 |
| ENSG00000144635 | -0.481814 | 5.097227 | 0.470499 | 1 DYNC1LI1      | K10416 |
| ENSG00000178878 | 0.501363  | 3.432172 | 0.470579 | 1 APOLD1        | K12581 |
| ENSG00000180376 | -0.503744 | 3.819303 | 0.470709 | 1 CCDC66        | -      |
| ENSG00000000003 | -0.49737  | 3.619896 | 0.470904 | 1 TSPAN6        | K17295 |
| ENSG00000100106 | -0.490473 | 4.2201   | 0.470964 | 1 TRIOBP        | -      |
| ENSG00000178752 | 0.504311  | 2.830599 | 0.471039 | 1 FAM132B       | -      |
| ENSG00000101190 | 0.480636  | 5.024143 | 0.471066 | 1 TCFL5         | K09092 |
| ENSG00000006634 | -0.480034 | 5.730613 | 0.471074 | 1 DBF4          | K06629 |
| ENSG00000196151 | -0.509773 | 3.3803   | 0.471154 | 1 WDSUB1        | -      |
| ENSG00000251562 | 0.472026  | 10.35697 | 0.471118 | 1 MALAT1        | -      |
| ENSG00000100983 | -0.475537 | 6.569694 | 0.471242 | 1 GSS           | K01920 |
| ENSG00000115977 | 0.552344  | 2.393629 | 0.471336 | 1 AAK1          | -      |
| ENSG00000178093 | 0.531928  | 2.402679 | 0.471336 | 1 TSSK6         | K08811 |
| ENSG00000185158 | 0.531928  | 2.402679 | 0.471336 | 1 LRRC37B       | -      |
| ENSG00000205476 | 0.480015  | 5.293196 | 0.471452 | 1 CCDC85C       | -      |
| ENSG00000250317 | -0.500245 | 3.706365 | 0.471648 | 1 SMIM20        | -      |
| ENSG00000225973 | -0.499433 | 3.846905 | 0.47182  | 1 RP11-139H15.1 | -      |
| ENSG00000234231 | -0.522713 | 2.745584 | 0.471923 | 1 AC093616.4    | K03348 |
| ENSG00000260896 | 0.516515  | 2.714818 | 0.471923 | 1 RP11-314O13.1 | -      |
| ENSG00000214717 | 0.472979  | 7.284672 | 0.472015 | 1 ZBED1         | K11170 |
| ENSG00000108175 | 0.474513  | 6.120676 | 0.472052 | 1 ZMIZ1         | -      |
| ENSG00000100292 | 0.490137  | 4.082775 | 0.472077 | 1 HMOX1         | K00510 |
| ENSG00000108176 | 0.487848  | 4.292374 | 0.47226  | 1 DNAJC12       | K09532 |
| ENSG00000166446 | 0.474593  | 6.395863 | 0.472274 | 1 CDYL2         | K00653 |
| ENSG00000151835 | -0.475983 | 5.865834 | 0.472328 | 1 SACS          | K17592 |
| ENSG00000164332 | -0.475472 | 6.091171 | 0.472361 | 1 UBLCP1        | K17618 |
| ENSG00000124635 | 0.529561  | 2.25476  | 0.472508 | 1 HIST1H2BJ     | K11252 |
| ENSG00000132680 | 0.473849  | 6.531272 | 0.472535 | 1 KIAA0907      | K17985 |
| ENSG00000124459 | -0.503773 | 3.41758  | 0.472635 | 1 ZNF45         | K09228 |
| ENSG00000203666 | -0.502397 | 3.587543 | 0.472743 | 1 EFCAB2        | -      |
| ENSG00000091140 | -0.472663 | 7.07421  | 0.472869 | 1 DLD           | K00382 |
| ENSG00000079819 | 0.474182  | 6.424799 | 0.47292  | 1 EPB41L2       | K06107 |
| ENSG00000233221 | -0.596338 | 1.596792 | 0.472999 | 1 AC133785.1    | -      |
| ENSG00000259305 | -0.596338 | 1.596792 | 0.472999 | 1 ZHX1-C8ORF76  | -      |
| ENSG00000077420 | -0.570422 | 1.580766 | 0.472999 | 1 APBB1IP       | K17704 |
| ENSG00000102780 | -0.483176 | 4.809527 | 0.47314  | 1 DGKH          | K00901 |
| ENSG00000179399 | 0.483747  | 3.944178 | 0.473409 | 1 GPC5          | K08111 |
| ENSG00000116044 | 0.471465  | 7.218034 | 0.473523 | 1 NFE2L2        | K05638 |
| ENSG00000120798 | -0.47676  | 5.802947 | 0.473659 | 1 NR2C1         | K08543 |
| ENSG00000176058 | -0.485637 | 4.607114 | 0.473732 | 1 TPRN          | -      |
| ENSG00000132510 | 0.479977  | 4.42924  | 0.473772 | 1 KDM6B         | -      |
| ENSG00000144559 | -0.562381 | 2.126352 | 0.473914 | 1 TAMM41        | K17807 |
| ENSG00000215883 | 0.552069  | 2.078668 | 0.473914 | 1 CYB5RL        | K00326 |
| ENSG00000185684 | -0.544716 | 2.115525 | 0.473914 | 1 EP400NL       | K11320 |
| ENSG00000267248 | -0.544716 | 2.115525 | 0.473914 | 1 CTD-2319I12.4 | -      |
| ENSG00000164171 | -0.47813  | 5.392204 | 0.473945 | 1 ITGA2         | K06481 |
| ENSG00000162976 | -0.511812 | 3.462129 | 0.474037 | 1 PQLC3         | -      |
| ENSG00000223705 | -0.514667 | 3.275679 | 0.474084 | 1 NSUN5P1       | K15264 |
| ENSG00000170647 | -0.523758 | 2.809608 | 0.474154 | 1 TMEM133       | -      |
| ENSG00000162878 | 0.471682  | 6.384326 | 0.474288 | 1 PKDCC         | K17548 |
| ENSG00000070495 | 0.472361  | 6.279599 | 0.474458 | 1 JMJD6         | K11323 |
| ENSG00000136522 | -0.472031 | 6.368847 | 0.474486 | 1 MRPL47        | K17428 |
| ENSG00000128654 | -0.47778  | 5.456405 | 0.474619 | 1 MTX2          | K17776 |
| ENSG00000100105 | -0.480021 | 4.959126 | 0.474889 | 1 PATZ1         | -      |
| ENSG00000204604 | -0.496608 | 3.196238 | 0.474926 | 1 ZNF468        | K09228 |

|                 |           |           |          |                  |        |
|-----------------|-----------|-----------|----------|------------------|--------|
| ENSG00000213853 | 0.469299  | 7.642549  | 0.475031 | 1 EMP2           | K19289 |
| ENSG00000120306 | 0.471379  | 5.942043  | 0.475127 | 1 CYSTM1         | -      |
| ENSG00000204936 | 0.535267  | 2.343421  | 0.475519 | 1 CD177          | K06552 |
| ENSG00000171603 | 0.470326  | 6.641022  | 0.475595 | 1 CLSTN1         | -      |
| ENSG00000115364 | -0.47177  | 6.414195  | 0.475625 | 1 MRPL19         | K02884 |
| ENSG00000008441 | 0.551873  | 1.891287  | 0.475626 | 1 NFIX           | K09171 |
| ENSG00000120370 | -0.479044 | 4.776355  | 0.475652 | 1 GORAB          | K19748 |
| ENSG00000099308 | 0.492209  | 3.738977  | 0.475653 | 1 MAST3          | K08789 |
| ENSG00000170364 | -0.510696 | 3.107777  | 0.475864 | 1 SETMAR         | K11433 |
| ENSG00000081760 | 0.472366  | 5.792274  | 0.475876 | 1 AACS           | K01907 |
| ENSG00000103494 | -0.496751 | 3.601961  | 0.475879 | 1 RPGRIP1L       | K16550 |
| ENSG00000168763 | 0.477605  | 5.016024  | 0.476004 | 1 CNNM3          | K16302 |
| ENSG00000234741 | -0.467784 | 8.292377  | 0.476007 | 1 GAS5           | -      |
| ENSG00000239900 | -0.470094 | 6.69284   | 0.476032 | 1 ADSL           | K01756 |
| ENSG00000175602 | -0.469792 | 6.814469  | 0.476051 | 1 CCDC85B        | K16758 |
| ENSG00000143545 | 0.469083  | 6.924742  | 0.476216 | 1 RAB13          | K06109 |
| ENSG00000257742 | -0.506214 | 3.248099  | 0.47649  | 1 RP11-350F4.2   | -      |
| ENSG00000247271 | -0.53242  | 2.579545  | 0.476642 | 1 ZBED5-AS1      | -      |
| ENSG00000005007 | 0.468805  | 6.735197  | 0.476829 | 1 UPF1           | K14326 |
| ENSG00000124151 | 0.471586  | 6.056743  | 0.476841 | 1 NCOA3          | K11256 |
| ENSG00000225259 | 0.494049  | 3.348592  | 0.477012 | 1 ST13P6         | K09560 |
| ENSG00000237517 | 0.556952  | 2.178388  | 0.477186 | 1 DGCR5          | -      |
| ENSG00000198909 | 0.473838  | 4.815277  | 0.477208 | 1 MAP3K3         | K04421 |
| ENSG00000114841 | 0.681271  | 0.917837  | 0.477216 | 1 DNAH1          | K10408 |
| ENSG00000101898 | -0.66765  | 0.989655  | 0.477216 | 1 RP3-324O17.4   | K07575 |
| ENSG00000257086 | -0.66765  | 0.989655  | 0.477216 | 1 RP11-783K16.13 | -      |
| ENSG00000073737 | -0.627199 | 0.96444   | 0.477216 | 1 DHRS9          | K11149 |
| ENSG00000225465 | -0.627199 | 0.96444   | 0.477216 | 1 RFPL1S         | -      |
| ENSG00000260430 | -0.627199 | 0.96444   | 0.477216 | 1 RP11-626G11.4  | -      |
| ENSG00000135049 | 0.469845  | 5.486939  | 0.477326 | 1 AGTPBP1        | -      |
| ENSG00000133315 | -0.473908 | 5.268223  | 0.47739  | 1 MACROD1        | -      |
| ENSG00000198585 | -0.512122 | 2.771234  | 0.47747  | 1 NUDT16         | K16855 |
| ENSG00000182208 | 0.487581  | 4.187775  | 0.47758  | 1 MOB2           | -      |
| ENSG00000205659 | -0.493064 | 3.812952  | 0.477733 | 1 LIN52          | K02927 |
| ENSG00000143674 | -0.476507 | 5.075315  | 0.477735 | 1 MLK4           | K17534 |
| ENSG00000237886 | -0.591412 | 1.735727  | 0.477755 | 1 RP11-611D20.2  | -      |
| ENSG00000256628 | -0.591412 | 1.735727  | 0.477755 | 1 ZBTB11-AS1     | -      |
| ENSG00000143499 | -0.473297 | 5.054387  | 0.478035 | 1 SMYD2          | K11426 |
| ENSG00000067182 | 0.465774  | 7.865268  | 0.478126 | 1 TNFRSF1A       | K03158 |
| ENSG00000171448 | 0.481056  | 4.370968  | 0.478201 | 1 ZBTB26         | K10505 |
| ENSG00000197183 | 0.490027  | 3.961129  | 0.478272 | 1 C20orf112      | -      |
| ENSG00000120662 | -0.485708 | 3.762116  | 0.478454 | 1 MTRF1          | K02835 |
| ENSG00000116260 | 0.466537  | 6.925817  | 0.478606 | 1 QSOX1          | K10758 |
| ENSG00000170035 | -0.471508 | 5.55558   | 0.478633 | 1 UBE2E3         | K06689 |
| ENSG00000121753 | 0.477373  | 4.706706  | 0.47868  | 1 BAI2           | K04597 |
| ENSG00000185736 | 0.480413  | 4.531572  | 0.47869  | 1 ADARB2         | K13194 |
| ENSG00000001617 | 0.468317  | 6.412966  | 0.478881 | 1 SEMA3F         | K06840 |
| ENSG00000165275 | -0.520948 | 2.64385   | 0.478927 | 1 TRMT10B        | K12581 |
| ENSG00000153395 | 0.464243  | 8.376095  | 0.47918  | 1 LPCAT1         | K13510 |
| ENSG00000117407 | -0.94699  | -0.087628 | 0.479207 | 1 ARTN           | -      |
| ENSG00000135205 | -0.94699  | -0.087628 | 0.479207 | 1 CCDC146        | -      |
| ENSG00000135838 | -0.94699  | -0.087628 | 0.479207 | 1 NPL            | K01639 |
| ENSG00000143178 | -0.94699  | -0.087628 | 0.479207 | 1 TBX19          | K10184 |
| ENSG00000159588 | -0.94699  | -0.087628 | 0.479207 | 1 CCDC17         | -      |
| ENSG00000165985 | -0.94699  | -0.087628 | 0.479207 | 1 C1QL3          | -      |
| ENSG00000166947 | -0.94699  | -0.087628 | 0.479207 | 1 EPB42          | -      |
| ENSG00000180815 | -0.94699  | -0.087628 | 0.479207 | 1 MAP3K15        | K13986 |
| ENSG00000213089 | -0.94699  | -0.087628 | 0.479207 | 1 PDCL3P5        | -      |

|                 |           |           |          |                 |               |
|-----------------|-----------|-----------|----------|-----------------|---------------|
| ENSG00000236393 | -0.94699  | -0.087628 | 0.479207 | 1 RP11-320G24.1 | -             |
| ENSG00000251026 | -0.94699  | -0.087628 | 0.479207 | 1 RP11-138J23.1 | -             |
| ENSG00000262712 | -0.94699  | -0.087628 | 0.479207 | 1 RP11-295D4.1  | -             |
| ENSG00000272909 | -0.94699  | -0.087628 | 0.479207 | 1 CTD-2555O16.4 | -             |
| ENSG00000141576 | 0.856925  | -0.197275 | 0.479207 | 1 RNF157        | -             |
| ENSG00000178996 | 0.856925  | -0.197275 | 0.479207 | 1 SNX18         | K17923        |
| ENSG00000181392 | 0.856925  | -0.197275 | 0.479207 | 1 SYNE4         | -             |
| ENSG00000182950 | 0.856925  | -0.197275 | 0.479207 | 1 ODF3L1        | -             |
| ENSG00000188659 | 0.856925  | -0.197275 | 0.479207 | 1 FAM154B       | K07560        |
| ENSG00000229873 | 0.856925  | -0.197275 | 0.479207 | 1 OGFR-AS1      | -             |
| ENSG00000237437 | 0.856925  | -0.197275 | 0.479207 | 1 ASS1P12       | K01940        |
| ENSG00000252817 | 0.856925  | -0.197275 | 0.479207 | 1 AL590431.1    | -             |
| ENSG00000254109 | 0.856925  | -0.197275 | 0.479207 | 1 RBPMS-AS1     | -             |
| ENSG00000258748 | 0.856925  | -0.197275 | 0.479207 | 1 CTD-2223O18.1 | -             |
| ENSG00000261731 | 0.856925  | -0.197275 | 0.479207 | 1 CTD-2358C21.4 | -             |
| ENSG00000261777 | 0.856925  | -0.197275 | 0.479207 | 1 RP11-529K1.2  | -             |
| ENSG00000029993 | -0.854881 | -0.144255 | 0.479207 | 1 HMGB3         | K11296        |
| ENSG00000108405 | -0.854881 | -0.144255 | 0.479207 | 1 P2RX1         | K05215        |
| ENSG00000135373 | -0.854881 | -0.144255 | 0.479207 | 1 EHF           | K17102        |
| ENSG00000166396 | -0.854881 | -0.144255 | 0.479207 | 1 SERPINB7      | K13964        |
| ENSG00000167588 | -0.854881 | -0.144255 | 0.479207 | 1 GPD1          | K00006        |
| ENSG00000171189 | -0.854881 | -0.144255 | 0.479207 | 1 GRIK1         | K05201        |
| ENSG00000178385 | -0.854881 | -0.144255 | 0.479207 | 1 PLEKHM3       | -             |
| ENSG00000230896 | -0.854881 | -0.144255 | 0.479207 | 1 RP11-767N6.7  | -             |
| ENSG00000254827 | -0.854881 | -0.144255 | 0.479207 | 1 SLC22A18AS    | -             |
| ENSG00000258900 | -0.854881 | -0.144255 | 0.479207 | 1 HNRNPCP1      | K12884        |
| ENSG00000265750 | -0.854881 | -0.144255 | 0.479207 | 1 RP11-799B12.4 | -             |
| ENSG00000049883 | -0.482533 | 4.304437  | 0.479224 | 1 PTCO2         | K17711        |
| ENSG00000012660 | 0.464706  | 7.603285  | 0.479393 | 1 ELOVL5        | K10244        |
| ENSG00000155868 | -0.487047 | 3.794057  | 0.479452 | 1 MED7          | K15148        |
| ENSG00000138758 | -0.513613 | 2.834159  | 0.479456 | 1               | 11-Sep K16939 |
| ENSG00000168917 | 0.512647  | 2.805498  | 0.479456 | 1 SLC35G2       | K17985        |
| ENSG00000127946 | 0.733283  | 0.463827  | 0.479616 | 1 HIP1          | K04559        |
| ENSG00000183091 | 0.733283  | 0.463827  | 0.479616 | 1 NEB           | K18267        |
| ENSG00000257702 | 0.733283  | 0.463827  | 0.479616 | 1 LBX2-AS1      | -             |
| ENSG00000270039 | 0.733283  | 0.463827  | 0.479616 | 1 RP11-571M6.17 | -             |
| ENSG00000273478 | 0.733283  | 0.463827  | 0.479616 | 1 RP11-465N4.5  | -             |
| ENSG00000196588 | 0.471544  | 5.441142  | 0.479753 | 1 MKL1          | -             |
| ENSG00000054598 | -0.466438 | 6.022164  | 0.479788 | 1 FOXC1         | K09396        |
| ENSG00000172071 | 0.473789  | 4.945053  | 0.480123 | 1 EIF2AK3       | K08860        |
| ENSG00000221963 | -0.467287 | 5.910913  | 0.480175 | 1 APOL6         | K14480        |
| ENSG00000163378 | -0.502668 | 3.127804  | 0.480182 | 1 EOGT          | K18134        |
| ENSG00000237248 | 0.482543  | 4.156137  | 0.480244 | 1 LINC00987     | -             |
| ENSG00000189403 | -0.463041 | 8.527115  | 0.480313 | 1 HMGB1         | K10802        |
| ENSG00000240682 | -0.473651 | 4.546525  | 0.480318 | 1 ISY1          | K12870        |
| ENSG00000133059 | 0.470832  | 4.587522  | 0.480404 | 1 DSTYK         | K16288        |
| ENSG00000056972 | 0.468508  | 5.124581  | 0.480439 | 1 TRAF3IP2      | -             |
| ENSG00000198353 | 0.551246  | 1.423919  | 0.480463 | 1 HOXC4         | K09304        |
| ENSG00000169084 | 0.467075  | 5.861933  | 0.480525 | 1 DHRSX         | K11170        |
| ENSG00000176476 | -0.495212 | 3.371597  | 0.480655 | 1 CCDC101       | K11364        |
| ENSG00000171497 | -0.46688  | 5.812335  | 0.480662 | 1 PPID          | K05864        |
| ENSG00000111845 | -0.464936 | 6.184405  | 0.480805 | 1 PAK1IP1       | K14830        |
| ENSG00000267519 | 0.469629  | 5.399061  | 0.480853 | 1 MIR24-2       | -             |
| ENSG00000168569 | -0.481327 | 4.191554  | 0.480975 | 1 TMEM223       | -             |
| ENSG00000063046 | 0.461748  | 9.686585  | 0.480989 | 1 EIF4B         | K03258        |
| ENSG00000166557 | 0.463433  | 7.232683  | 0.481053 | 1 TMED3         | K14825        |
| ENSG00000242125 | -0.464208 | 6.916551  | 0.481094 | 1 SNHG3         | -             |
| ENSG00000145743 | -0.487976 | 3.682512  | 0.481116 | 1 FBXL17        | K10283        |

|                 |           |          |          |                 |        |
|-----------------|-----------|----------|----------|-----------------|--------|
| ENSG00000170903 | -0.487976 | 3.682512 | 0.481116 | 1 MSANTD4       | -      |
| ENSG00000093010 | -0.464413 | 6.71594  | 0.481318 | 1 COMT          | K00545 |
| ENSG00000085840 | 0.466423  | 5.484978 | 0.481809 | 1 ORC1          | K02603 |
| ENSG00000156469 | -0.467662 | 5.85     | 0.481815 | 1 MTERFD1       | K15032 |
| ENSG00000109534 | -0.469602 | 5.361657 | 0.482022 | 1 GARI          | K11128 |
| ENSG00000121486 | -0.472678 | 4.90608  | 0.482139 | 1 TRMT1L        | -      |
| ENSG00000129757 | 0.463425  | 6.594001 | 0.482185 | 1 CDKN1C        | K09993 |
| ENSG00000004864 | -0.467193 | 5.864345 | 0.482259 | 1 SLC25A13      | K15105 |
| ENSG00000172115 | -0.460658 | 8.54961  | 0.482553 | 1 CYCS          | K08738 |
| ENSG00000116786 | 0.463236  | 6.034773 | 0.482901 | 1 PLEKHM2       | K15348 |
| ENSG00000151743 | 0.51452   | 2.760869 | 0.482914 | 1 AMN1          | -      |
| ENSG00000128311 | -0.466246 | 5.364845 | 0.482944 | 1 TST           | K01011 |
| ENSG00000101473 | 0.473072  | 4.580182 | 0.483008 | 1 ACOT8         | K11992 |
| ENSG00000148358 | 0.470868  | 4.390025 | 0.483622 | 1 GPR107        | -      |
| ENSG00000141543 | 0.459616  | 8.208788 | 0.48367  | 1 EIF4A3        | K13025 |
| ENSG00000103047 | -0.474084 | 4.885501 | 0.483837 | 1 TANGO6        | -      |
| ENSG00000130508 | 0.464503  | 5.724894 | 0.483875 | 1 PXDN          | K19511 |
| ENSG00000157184 | -0.470616 | 4.715978 | 0.483957 | 1 CPT2          | K08766 |
| ENSG00000260005 | -0.615091 | 1.175447 | 0.483994 | 1 AC027601.1    | -      |
| ENSG00000247844 | 0.460079  | 7.296962 | 0.484137 | 1 CCAT1         | -      |
| ENSG00000158792 | -0.488736 | 3.388317 | 0.484252 | 1 SPATA2L       | K17595 |
| ENSG00000037241 | -0.465046 | 5.63082  | 0.48446  | 1 RPL26L1       | K02898 |
| ENSG00000140577 | 0.460151  | 6.837472 | 0.484793 | 1 CRTC3         | K16334 |
| ENSG00000198081 | -0.487694 | 3.809766 | 0.484852 | 1 ZBTB14        | -      |
| ENSG00000233024 | 0.558829  | 1.577133 | 0.484925 | 1 NPIPA7        | K04985 |
| ENSG00000229638 | 0.473567  | 4.696591 | 0.484935 | 1 RPL4P4        | K02930 |
| ENSG00000111981 | -0.512492 | 2.240632 | 0.48504  | 1 ULBP1         | K07986 |
| ENSG00000156239 | -0.512492 | 2.240632 | 0.48504  | 1 N6AMT1        | K02493 |
| ENSG00000161082 | -0.564398 | 1.966572 | 0.485092 | 1 CELF5         | K13207 |
| ENSG00000256433 | -0.564398 | 1.966572 | 0.485092 | 1 RP1-102E24.8  | -      |
| ENSG00000120669 | -0.467573 | 5.323911 | 0.48516  | 1 SOHLH2        | -      |
| ENSG00000179111 | -0.466435 | 5.088219 | 0.485196 | 1 HES7          | K09087 |
| ENSG00000185947 | 0.477655  | 3.906668 | 0.485547 | 1 ZNF267        | K09228 |
| ENSG00000181381 | -0.463251 | 5.518826 | 0.485697 | 1 DDX60L        | K12581 |
| ENSG00000181472 | -0.469371 | 5.180424 | 0.485751 | 1 ZBTB2         | K10489 |
| ENSG00000012822 | 0.463742  | 5.174115 | 0.485751 | 1 CALCOCO1      | -      |
| ENSG00000247828 | -0.4883   | 3.191276 | 0.485767 | 1 TMEM161B-AS1  | -      |
| ENSG00000101255 | -0.459745 | 6.560503 | 0.486093 | 1 TRIB3         | K19518 |
| ENSG00000196756 | -0.464407 | 5.39428  | 0.486255 | 1 SNHG17        | -      |
| ENSG00000164535 | 0.461242  | 5.791468 | 0.486342 | 1 DAGLB         | K13806 |
| ENSG00000128487 | 0.457157  | 7.779409 | 0.486361 | 1 SPECC1        | -      |
| ENSG00000043355 | -0.463125 | 5.104842 | 0.486643 | 1 ZIC2          | K06235 |
| ENSG00000176273 | -0.476124 | 3.787589 | 0.4867   | 1 SLC35G1       | -      |
| ENSG00000112414 | -0.458727 | 6.409094 | 0.48677  | 1 GPR126        | K08463 |
| ENSG00000119906 | -0.470197 | 4.050595 | 0.486849 | 1 FAM178A       | -      |
| ENSG00000175471 | -0.472204 | 4.518141 | 0.486876 | 1 MCTP1         | -      |
| ENSG00000268516 | 0.507436  | 2.522654 | 0.486983 | 1 CTD-3138B18.5 | -      |
| ENSG00000196968 | 0.468328  | 4.3984   | 0.48718  | 1 FUT11         | K11257 |
| ENSG00000158373 | 0.483178  | 3.382862 | 0.487804 | 1 HIST1H2BD     | K11252 |
| ENSG00000071994 | -0.457249 | 6.809064 | 0.487896 | 1 PDCD2         | K14801 |
| ENSG00000167280 | -0.467915 | 4.815701 | 0.487928 | 1 ENGASE        | K01227 |
| ENSG00000164362 | -0.544663 | 2.063805 | 0.48798  | 1 TERT          | K11126 |
| ENSG00000168661 | -0.544663 | 2.063805 | 0.48798  | 1 ZNF30         | K09228 |
| ENSG00000134333 | 0.454082  | 10.78123 | 0.488078 | 1 LDHA          | K00016 |
| ENSG00000262477 | -0.474433 | 3.640784 | 0.488093 | 1 AC021224.1    | -      |
| ENSG00000074356 | -0.468651 | 4.730882 | 0.488238 | 1 C17orf85      | -      |
| ENSG00000162688 | -0.458485 | 6.001151 | 0.48826  | 1 AGL           | K01196 |
| ENSG00000082212 | -0.458479 | 5.944004 | 0.488476 | 1 ME2           | K00027 |

|                 |           |          |          |                |        |
|-----------------|-----------|----------|----------|----------------|--------|
| ENSG00000100271 | 0.564977  | 1.715848 | 0.48859  | 1 TTLL1        | K16599 |
| ENSG00000090971 | -0.544324 | 1.772737 | 0.48859  | 1 NAT14        | -      |
| ENSG00000151611 | -0.544324 | 1.772737 | 0.48859  | 1 MMAA         | K07588 |
| ENSG00000182890 | 0.531938  | 1.730785 | 0.48859  | 1 GLUD2        | K00261 |
| ENSG00000156876 | -0.458144 | 6.014076 | 0.488603 | 1 SASS6        | K16487 |
| ENSG00000162913 | 0.559998  | 1.305329 | 0.489124 | 1 C1orf145     | K17531 |
| ENSG00000166780 | 0.559998  | 1.305329 | 0.489124 | 1 C16orf45     | -      |
| ENSG00000144485 | -0.489954 | 3.01812  | 0.489153 | 1 HES6         | K09087 |
| ENSG00000133466 | 0.455547  | 6.510633 | 0.489429 | 1 C1QTNF6      | K19470 |
| ENSG00000111875 | -0.462352 | 5.054363 | 0.489449 | 1 ASF1A        | K10753 |
| ENSG00000126870 | 0.466404  | 4.829283 | 0.489638 | 1 WDR60        | -      |
| ENSG00000182796 | -0.51431  | 2.864616 | 0.489778 | 1 TMEM198B     | K17692 |
| ENSG00000186666 | -0.503831 | 2.858307 | 0.489778 | 1 BCDIN3D      | -      |
| ENSG00000130164 | 0.455784  | 6.315866 | 0.489905 | 1 LDLR         | K12473 |
| ENSG00000010704 | -0.472721 | 4.013144 | 0.490082 | 1 HFE          | K11253 |
| ENSG00000056050 | -0.46054  | 4.906042 | 0.490166 | 1 C4orf27      | -      |
| ENSG00000113368 | -0.454383 | 6.9126   | 0.490415 | 1 LMNB1        | K07611 |
| ENSG00000185164 | 0.459501  | 5.494757 | 0.490515 | 1 NOMO2        | -      |
| ENSG00000198276 | -0.460709 | 5.330447 | 0.490515 | 1 UCKL1        | K00876 |
| ENSG00000141127 | -0.46005  | 5.436327 | 0.490563 | 1 PRPSAP2      | K17299 |
| ENSG00000082269 | -0.479373 | 3.742531 | 0.490582 | 1 FAM135A      | -      |
| ENSG00000136824 | -0.454492 | 6.722208 | 0.490705 | 1 SMC2         | K06674 |
| ENSG00000105514 | 0.474216  | 3.640565 | 0.491067 | 1 RAB3D        | K07884 |
| ENSG00000233762 | 0.464163  | 4.621869 | 0.49118  | 1 AC007969.5   | K02958 |
| ENSG00000183666 | -0.505577 | 2.917613 | 0.491182 | 1 GUSBP1       | K01195 |
| ENSG00000162994 | 0.495039  | 2.897103 | 0.491182 | 1 CLHC1        | -      |
| ENSG00000115561 | -0.461017 | 4.694119 | 0.491314 | 1 CHMP3        | K12193 |
| ENSG00000164265 | 0.509531  | 2.468223 | 0.491483 | 1 SCGB3A2      | -      |
| ENSG00000177192 | -0.457224 | 5.980508 | 0.491571 | 1 PUS1         | K06173 |
| ENSG00000168826 | -0.523467 | 1.883527 | 0.491653 | 1 ZBTB49       | -      |
| ENSG00000225697 | 0.457369  | 5.858136 | 0.491663 | 1 SLC26A6      | K14704 |
| ENSG00000125089 | 0.467121  | 4.52403  | 0.491764 | 1 SH3TC1       | -      |
| ENSG00000175130 | -0.453025 | 6.731304 | 0.492083 | 1 MARCKSL1     | K13536 |
| ENSG00000156475 | -0.489609 | 2.757693 | 0.492084 | 1 PPP2R2B      | K04354 |
| ENSG00000152219 | -0.458617 | 4.953427 | 0.492401 | 1 ARL14EP      | K17985 |
| ENSG00000162174 | 0.486581  | 2.960666 | 0.492481 | 1 ASRGL1       | K13051 |
| ENSG00000157985 | 0.459985  | 5.046968 | 0.492527 | 1 AGAP1        | K12491 |
| ENSG00000122378 | -0.479503 | 3.34136  | 0.492967 | 1 FAM213A      | K11447 |
| ENSG00000139160 | -0.599226 | 1.521901 | 0.49314  | 1 METTL20      | -      |
| ENSG00000229186 | -0.599226 | 1.521901 | 0.49314  | 1 ADAM1A       | K08607 |
| ENSG00000137601 | -0.479685 | 3.626745 | 0.493249 | 1 NEK1         | K08857 |
| ENSG00000140396 | -0.457781 | 4.732484 | 0.493492 | 1 NCOA2        | K11255 |
| ENSG00000112343 | -0.461584 | 4.7505   | 0.493847 | 1 TRIM38       | K12014 |
| ENSG00000164933 | -0.453177 | 6.171741 | 0.493851 | 1 SLC25A32     | K15115 |
| ENSG00000139618 | -0.481474 | 3.383996 | 0.493898 | 1 BRCA2        | K08775 |
| ENSG00000105185 | -0.451365 | 6.53763  | 0.494123 | 1 PDCD5        | K06875 |
| ENSG00000135127 | 0.470715  | 4.17825  | 0.494132 | 1 CCDC64       | K16756 |
| ENSG00000107105 | -0.525284 | 1.998341 | 0.494252 | 1 ELAVL2       | K13208 |
| ENSG00000120526 | -0.450416 | 6.753387 | 0.494528 | 1 NUDCD1       | -      |
| ENSG00000090554 | 0.790017  | 0.224692 | 0.494712 | 1 FLT3LG       | K05454 |
| ENSG00000170153 | 0.790017  | 0.224692 | 0.494712 | 1 RNF150       | K15701 |
| ENSG00000256817 | 0.790017  | 0.224692 | 0.494712 | 1 TPT1P12      | -      |
| ENSG00000115295 | -0.760443 | 0.281025 | 0.494712 | 1 CLIP4        | K10423 |
| ENSG00000144460 | -0.760443 | 0.281025 | 0.494712 | 1 NYAP2        | K17985 |
| ENSG00000150672 | -0.760443 | 0.281025 | 0.494712 | 1 DLG2         | K12075 |
| ENSG00000212232 | -0.760443 | 0.281025 | 0.494712 | 1 SNORD17      | -      |
| ENSG00000261159 | -0.760443 | 0.281025 | 0.494712 | 1 RP11-723O4.9 | -      |
| ENSG00000143515 | 0.471089  | 3.553545 | 0.494757 | 1 ATP8B2       | K01530 |

|                  |           |          |          |                  |        |
|------------------|-----------|----------|----------|------------------|--------|
| ENSG00000083828  | 0.480658  | 3.246202 | 0.494797 | 1 ZNF586         | K09228 |
| ENSG00000053702  | 0.620307  | 0.944861 | 0.494848 | 1 NRIP2          | K13215 |
| ENSG000000204524 | 0.620307  | 0.944861 | 0.494848 | 1 ZNF805         | K09228 |
| ENSG000000253958 | 0.620307  | 0.944861 | 0.494848 | 1 CLDN23         | K06087 |
| ENSG000000254639 | 0.620307  | 0.944861 | 0.494848 | 1 CTD-2589M5.5   | -      |
| ENSG000000248019 | 0.561815  | 0.971308 | 0.494848 | 1 FAM13A-AS1     | -      |
| ENSG000000163374 | 0.452189  | 5.962592 | 0.495137 | 1 YY1AP1         | -      |
| ENSG000000183520 | -0.451922 | 6.055475 | 0.495367 | 1 UTP11L         | K14769 |
| ENSG000000068784 | -0.468259 | 4.172141 | 0.495677 | 1 SRBD1          | -      |
| ENSG000000111424 | -0.466519 | 3.982933 | 0.495858 | 1 VDR            | K08539 |
| ENSG000000136068 | 0.446889  | 8.041818 | 0.495948 | 1 FLNB           | K04437 |
| ENSG000000141337 | -0.486521 | 2.934452 | 0.496003 | 1 ARSG           | K12381 |
| ENSG000000154447 | 0.457804  | 4.655414 | 0.496029 | 1 SH3RF1         | K12171 |
| ENSG000000225892 | -0.593748 | 1.667949 | 0.496369 | 1 RP11-384K6.2   | -      |
| ENSG000000073670 | 0.572939  | 1.619473 | 0.496369 | 1 ADAM11         | K16067 |
| ENSG000000273329 | 0.572939  | 1.619473 | 0.496369 | 1 RP11-448A19.1  | -      |
| ENSG000000139278 | -0.569157 | 1.652749 | 0.496369 | 1 GLIPR1         | -      |
| ENSG000000273066 | -0.569157 | 1.652749 | 0.496369 | 1 RP11-216L13.19 | -      |
| ENSG000000243479 | -0.526831 | 2.104607 | 0.496484 | 1 MNX1-AS1       | -      |
| ENSG000000157869 | -0.460192 | 4.30205  | 0.496506 | 1 RAB28          | K07915 |
| ENSG000000180694 | -0.450474 | 5.49282  | 0.496516 | 1 TMEM64         | -      |
| ENSG000000125870 | -0.44926  | 6.14293  | 0.497159 | 1 SNRPB2         | K11094 |
| ENSG000000123607 | -0.466364 | 4.061089 | 0.497452 | 1 TTC21B         | K19673 |
| ENSG000000038382 | 0.447222  | 6.649282 | 0.497496 | 1 TRIO           | K08810 |
| ENSG000000106351 | 0.450316  | 5.464225 | 0.497612 | 1 AGFG2          | -      |
| ENSG000000115548 | 0.447064  | 6.089975 | 0.497677 | 1 KDM3A          | K15601 |
| ENSG000000167513 | 0.446478  | 6.881693 | 0.497762 | 1 CDT1           | K10727 |
| ENSG000000178966 | -0.455739 | 4.944918 | 0.49785  | 1 RMI1           | K10990 |
| ENSG000000131711 | 1.018542  | -0.59288 | 0.497906 | 1 MAP1B          | K10429 |
| ENSG000000136383 | 1.018542  | -0.59288 | 0.497906 | 1 ALPK3          | K08868 |
| ENSG000000138642 | 1.018542  | -0.59288 | 0.497906 | 1 HERC6          | K10614 |
| ENSG000000162931 | 1.018542  | -0.59288 | 0.497906 | 1 TRIM17         | K12007 |
| ENSG000000177173 | 1.018542  | -0.59288 | 0.497906 | 1 NAP1L4P1       | K11282 |
| ENSG000000179168 | 1.018542  | -0.59288 | 0.497906 | 1 GGN            | -      |
| ENSG000000200090 | 1.018542  | -0.59288 | 0.497906 | 1 Y_RNA          | -      |
| ENSG000000214784 | 1.018542  | -0.59288 | 0.497906 | 1 AC010468.1     | K02984 |
| ENSG000000225313 | 1.018542  | -0.59288 | 0.497906 | 1 RP11-415J8.3   | -      |
| ENSG000000225745 | 1.018542  | -0.59288 | 0.497906 | 1 PLAC4          | -      |
| ENSG000000225778 | 1.018542  | -0.59288 | 0.497906 | 1 PROSER2-AS1    | -      |
| ENSG000000227953 | 1.018542  | -0.59288 | 0.497906 | 1 RP11-439E19.3  | -      |
| ENSG000000233785 | 1.018542  | -0.59288 | 0.497906 | 1 RP13-314C10.5  | -      |
| ENSG000000235001 | 1.018542  | -0.59288 | 0.497906 | 1 EIF4A1P2       | K03257 |
| ENSG000000239127 | 1.018542  | -0.59288 | 0.497906 | 1 SNORD125       | -      |
| ENSG000000242198 | 1.018542  | -0.59288 | 0.497906 | 1 CTD-2235C13.1  | K02976 |
| ENSG000000245275 | 1.018542  | -0.59288 | 0.497906 | 1 SAP30L-AS1     | -      |
| ENSG000000248787 | 1.018542  | -0.59288 | 0.497906 | 1 RP11-666A20.4  | -      |
| ENSG000000251034 | 1.018542  | -0.59288 | 0.497906 | 1 RP11-582J16.4  | -      |
| ENSG000000260190 | 1.018542  | -0.59288 | 0.497906 | 1 RP11-229P13.25 | -      |
| ENSG000000263089 | 1.018542  | -0.59288 | 0.497906 | 1 RP11-166P13.4  | -      |
| ENSG000000267082 | 1.018542  | -0.59288 | 0.497906 | 1 CTC-510F12.2   | -      |
| ENSG000000267681 | 1.018542  | -0.59288 | 0.497906 | 1 CTD-3199J23.6  | K11299 |
| ENSG000000268852 | 1.018542  | -0.59288 | 0.497906 | 1 AC132872.2     | K18047 |
| ENSG000000270049 | 1.018542  | -0.59288 | 0.497906 | 1 RP11-297D21.4  | -      |
| ENSG000000272430 | 1.018542  | -0.59288 | 0.497906 | 1 RP11-38L15.8   | -      |
| ENSG000000210196 | 0.446621  | 6.730155 | 0.497909 | 1 MT-TP          | -      |
| ENSG000000141905 | 0.446704  | 6.647966 | 0.497996 | 1 NFIC           | K09170 |
| ENSG000000166012 | -0.444911 | 7.963071 | 0.498047 | 1 TAF1D          | -      |
| ENSG000000134769 | -0.491012 | 3.044959 | 0.498147 | 1 DTNA           | -      |

|                 |           |          |          |                 |        |
|-----------------|-----------|----------|----------|-----------------|--------|
| ENSG00000178075 | -0.491012 | 3.044959 | 0.498147 | 1 GRAMD1C       | -      |
| ENSG00000140367 | -0.473708 | 3.73918  | 0.498205 | 1 UBE2Q2        | K10582 |
| ENSG00000080603 | 0.450498  | 5.538905 | 0.498251 | 1 SRCAP         | K11661 |
| ENSG00000184575 | -0.444541 | 8.080741 | 0.498298 | 1 XPOT          | K14288 |
| ENSG00000013288 | 0.451771  | 4.711859 | 0.498451 | 1 MAN2B2        | K12312 |
| ENSG00000158006 | -0.476309 | 3.274933 | 0.498608 | 1 PAFAH2        | K01062 |
| ENSG00000153179 | -0.450798 | 5.109898 | 0.498823 | 1 RASSF3        | K09852 |
| ENSG00000168002 | -0.449921 | 5.82862  | 0.498857 | 1 POLR2G        | K03015 |
| ENSG00000125257 | 0.445961  | 6.506258 | 0.498888 | 1 ABCC4         | K05673 |
| ENSG00000266967 | -0.484089 | 3.091846 | 0.499108 | 1 AARSD1        | K07050 |
| ENSG00000243660 | 0.479535  | 2.561197 | 0.499285 | 1 ZNF487        | K05610 |
| ENSG00000197536 | -0.577259 | 1.24982  | 0.499294 | 1 C5orf56       | -      |
| ENSG00000260766 | -0.577259 | 1.24982  | 0.499294 | 1 RP11-226L15.5 | -      |
| ENSG00000264058 | -0.577259 | 1.24982  | 0.499294 | 1 KRT222        | K11651 |
| ENSG00000223820 | 0.570479  | 1.176213 | 0.499294 | 1 CFL1P1        | -      |
| ENSG00000224877 | -0.447123 | 6.156497 | 0.499375 | 1 C17orf89      | -      |
| ENSG00000169991 | 0.474472  | 3.296326 | 0.499418 | 1 IFFO2         | -      |
| ENSG00000079257 | 0.447279  | 5.7779   | 0.499867 | 1 LXN           | -      |
| ENSG00000143772 | -0.529324 | 2.296025 | 0.500122 | 1 ITPKB         | K00911 |
| ENSG00000241935 | -0.513586 | 2.286465 | 0.500122 | 1 HOGA1         | K18123 |
| ENSG00000130600 | 0.443094  | 7.336032 | 0.500329 | 1 H19           | -      |
| ENSG00000143252 | -0.44512  | 6.445244 | 0.500502 | 1 SDHC          | K00236 |
| ENSG00000248175 | 0.486646  | 2.633358 | 0.500545 | 1 CTC-428G20.3  | -      |
| ENSG00000189362 | -0.485396 | 2.656777 | 0.500545 | 1 TMEM194B      | -      |
| ENSG00000100344 | -0.477874 | 2.95701  | 0.500741 | 1 PNPLA3        | K13534 |
| ENSG00000175482 | -0.477874 | 2.95701  | 0.500741 | 1 POLD4         | K03505 |
| ENSG00000198088 | -0.477874 | 2.95701  | 0.500741 | 1 NUP62CL       | K14306 |
| ENSG00000198919 | -0.463268 | 3.748848 | 0.500954 | 1 DZIP3         | K10642 |
| ENSG00000163900 | -0.452049 | 5.335869 | 0.500959 | 1 TMEM41A       | K12581 |
| ENSG00000158467 | 0.453696  | 4.447649 | 0.50098  | 1 AHCYL2        | K01251 |
| ENSG00000105974 | -0.441801 | 7.894113 | 0.501113 | 1 CAV1          | K06278 |
| ENSG00000168014 | 0.451661  | 4.639667 | 0.501272 | 1 C2CD3         | K16751 |
| ENSG00000186260 | 0.464961  | 3.762187 | 0.501492 | 1 MKL2          | -      |
| ENSG00000168614 | -0.515572 | 2.373947 | 0.501624 | 1 NBPF9         | -      |
| ENSG00000162585 | -0.448515 | 4.834164 | 0.501752 | 1 C1orf86       | K18952 |
| ENSG00000196526 | 0.442253  | 6.896507 | 0.501807 | 1 AFAP1         | K18616 |
| ENSG00000120800 | -0.446805 | 5.389059 | 0.501843 | 1 UTP20         | K14772 |
| ENSG00000132600 | 0.442567  | 6.705508 | 0.501863 | 1 PRMT7         | K11438 |
| ENSG00000167202 | 0.456108  | 4.41093  | 0.502014 | 1 TBC1D2B       | -      |
| ENSG00000132963 | -0.442242 | 6.859366 | 0.502164 | 1 POMP          | K11599 |
| ENSG00000065526 | 0.444032  | 5.561412 | 0.502363 | 1 SPEN          | -      |
| ENSG00000181444 | 0.464138  | 3.26948  | 0.502368 | 1 ZNF467        | K09228 |
| ENSG00000139826 | -0.448856 | 4.947737 | 0.502412 | 1 ABHD13        | K06889 |
| ENSG00000160007 | 0.44361   | 6.410827 | 0.502413 | 1 ARHGAP35      | K05732 |
| ENSG00000100916 | -0.473788 | 3.060419 | 0.502538 | 1 BRMS1L        | K19196 |
| ENSG00000231419 | 0.472175  | 3.043147 | 0.502538 | 1 LINC00689     | -      |
| ENSG00000178209 | 0.44639   | 5.786682 | 0.502556 | 1 PLEC          | K10388 |
| ENSG00000125731 | -0.451801 | 4.806285 | 0.502561 | 1 SH2D3A        | -      |
| ENSG00000002746 | -0.543775 | 1.40665  | 0.502646 | 1 HECW1         | K12167 |
| ENSG00000229953 | -0.543775 | 1.40665  | 0.502646 | 1 RP11-284F21.7 | -      |
| ENSG00000123213 | -0.444219 | 6.054174 | 0.502727 | 1 NLN           | K01393 |
| ENSG00000145414 | -0.458608 | 4.004838 | 0.502809 | 1 NAF1          | K14763 |
| ENSG00000151665 | -0.458608 | 4.004838 | 0.502809 | 1 PIGF          | K05287 |
| ENSG00000137135 | -0.453831 | 4.479304 | 0.502966 | 1 ARHGEF39      | K09228 |
| ENSG00000197959 | -0.710288 | 0.607863 | 0.503    | 1 DNM3          | K01528 |
| ENSG00000246465 | -0.710288 | 0.607863 | 0.503    | 1 RP11-57A19.2  | -      |
| ENSG00000169955 | -0.464409 | 3.332404 | 0.503063 | 1 ZNF747        | K09228 |
| ENSG00000131746 | 0.441812  | 6.260727 | 0.503064 | 1 TNS4          | K18080 |



|                 |           |          |          |                 |        |
|-----------------|-----------|----------|----------|-----------------|--------|
| ENSG00000139726 | -0.441761 | 6.617836 | 0.503154 | 1 DENR          | K17985 |
| ENSG00000090989 | -0.451892 | 4.921987 | 0.503171 | 1 EXOC1         | -      |
| ENSG00000170584 | -0.4462   | 5.792757 | 0.503225 | 1 NUDCD2        | -      |
| ENSG00000166979 | 0.443301  | 5.869435 | 0.503228 | 1 EVA1C         | -      |
| ENSG00000181830 | 0.440905  | 6.790926 | 0.503302 | 1 SLC35C1       | K15279 |
| ENSG00000214510 | 0.477578  | 3.095285 | 0.503343 | 1 SPINK13       | -      |
| ENSG00000154889 | 0.466793  | 3.542353 | 0.503419 | 1 MPPE1         | K12581 |
| ENSG00000124802 | -0.442636 | 6.136116 | 0.503475 | 1 EEF1E1        | K15439 |
| ENSG00000115540 | -0.449524 | 5.090756 | 0.503579 | 1 MOB4          | -      |
| ENSG00000186318 | 0.465138  | 3.739349 | 0.503676 | 1 BACE1         | K04521 |
| ENSG00000132879 | 0.449863  | 4.730193 | 0.504031 | 1 FBXO44        | K10103 |
| ENSG00000100284 | 0.446399  | 5.120838 | 0.504148 | 1 TOM1          | -      |
| ENSG00000033327 | 0.461096  | 3.775127 | 0.504154 | 1 GAB2          | K08091 |
| ENSG00000155254 | -0.440942 | 6.52251  | 0.504177 | 1 MARVELD1      | -      |
| ENSG00000143157 | -0.441615 | 6.150361 | 0.504185 | 1 POGK          | -      |
| ENSG00000095951 | -0.450879 | 4.752081 | 0.504272 | 1 HIVEP1        | K12581 |
| ENSG00000015171 | -0.444182 | 5.326076 | 0.504291 | 1 ZMYND11       | -      |
| ENSG00000196470 | -0.462215 | 3.633564 | 0.504498 | 1 SIAH1         | K04506 |
| ENSG00000187097 | -0.485281 | 2.905441 | 0.504583 | 1 ENTPD5        | K01511 |
| ENSG00000004777 | 0.526609  | 2.090086 | 0.504734 | 1 ARHGAP33      | K17933 |
| ENSG00000101361 | -0.438316 | 7.638342 | 0.50476  | 1 NOP56         | K14564 |
| ENSG00000167721 | -0.438988 | 7.125402 | 0.504825 | 1 TSR1          | K14799 |
| ENSG00000129055 | -0.440531 | 6.09253  | 0.504863 | 1 ANAPC13       | K12456 |
| ENSG00000136643 | -0.445175 | 5.177971 | 0.504864 | 1 RPS6KC1       | -      |
| ENSG00000127948 | 0.453706  | 4.516451 | 0.50516  | 1 POR           | K00327 |
| ENSG00000137710 | 0.4384    | 7.119871 | 0.505171 | 1 RDX           | K05762 |
| ENSG00000003987 | 0.582131  | 1.516241 | 0.505261 | 1 MTMR7         | K18083 |
| ENSG00000046653 | 0.543829  | 1.533565 | 0.505261 | 1 GPM6B         | -      |
| ENSG00000152492 | -0.440529 | 6.461739 | 0.505577 | 1 CCDC50        | -      |
| ENSG00000113070 | 0.457467  | 3.719592 | 0.505934 | 1 HBEGF         | K08523 |
| ENSG00000132952 | -0.451973 | 4.231482 | 0.506102 | 1 USPL1         | -      |
| ENSG00000174977 | -0.445926 | 4.973037 | 0.506171 | 1 AC026271.5    | K14322 |
| ENSG00000072954 | 0.477786  | 2.66161  | 0.506213 | 1 TMEM38A       | K14209 |
| ENSG00000100479 | -0.456811 | 4.117587 | 0.506515 | 1 POLE2         | K02325 |
| ENSG00000183255 | 0.43555   | 8.631091 | 0.50653  | 1 PTTG1IP       | -      |
| ENSG00000125863 | -0.440825 | 6.111011 | 0.50665  | 1 MKKS          | K09492 |
| ENSG00000115355 | -0.440841 | 5.877843 | 0.506897 | 1 CCDC88A       | -      |
| ENSG00000158286 | -0.462394 | 3.824984 | 0.507191 | 1 RNF207        | -      |
| ENSG00000126768 | -0.544236 | 1.706658 | 0.507356 | 1 TIMM17B       | K15696 |
| ENSG00000154957 | -0.499208 | 2.321553 | 0.507365 | 1 ZNF18         | K09229 |
| ENSG00000182324 | -0.499208 | 2.321553 | 0.507365 | 1 KCNJ14        | K05007 |
| ENSG00000135045 | -0.444027 | 5.446396 | 0.50761  | 1 C9orf40       | -      |
| ENSG00000131650 | -0.443886 | 4.910365 | 0.50764  | 1 KREMEN2       | -      |
| ENSG00000181222 | 0.436234  | 6.861009 | 0.5077   | 1 POLR2A        | K03006 |
| ENSG00000175084 | 0.45833   | 3.408346 | 0.507729 | 1 DES           | K07610 |
| ENSG00000091947 | 0.438799  | 5.579902 | 0.507783 | 1 TMEM101       | -      |
| ENSG00000086189 | -0.438919 | 5.90147  | 0.507798 | 1 DIMT1         | K14191 |
| ENSG00000134480 | -0.437838 | 6.084818 | 0.507857 | 1 CCNH          | K06634 |
| ENSG00000173890 | -0.679167 | 0.873416 | 0.508053 | 1 GPR160        | -      |
| ENSG00000180881 | -0.679167 | 0.873416 | 0.508053 | 1 CAPS2         | -      |
| ENSG00000186523 | -0.679167 | 0.873416 | 0.508053 | 1 FAM86B1       | K03842 |
| ENSG00000261884 | -0.679167 | 0.873416 | 0.508053 | 1 CTC-479C5.12  | K09632 |
| ENSG00000160318 | -0.635001 | 0.845902 | 0.508053 | 1 CLDND2        | -      |
| ENSG00000175591 | -0.635001 | 0.845902 | 0.508053 | 1 P2RY2         | K04269 |
| ENSG00000257718 | -0.635001 | 0.845902 | 0.508053 | 1 RP11-396F22.1 | -      |
| ENSG00000105550 | 0.575816  | 0.807127 | 0.508053 | 1 FGF21         | K04358 |
| ENSG00000122367 | 0.575816  | 0.807127 | 0.508053 | 1 LDB3          | K12581 |
| ENSG00000141655 | 0.575816  | 0.807127 | 0.508053 | 1 TNFRSF11A     | K05147 |

|                 |           |          |          |                 |        |
|-----------------|-----------|----------|----------|-----------------|--------|
| ENSG00000214982 | 0.575816  | 0.807127 | 0.508053 | 1 PARGP1        | K07759 |
| ENSG00000272669 | 0.575816  | 0.807127 | 0.508053 | 1 RP3-508I15.21 | -      |
| ENSG00000206262 | 0.493548  | 2.362127 | 0.50845  | 1 C3orf72       | K11447 |
| ENSG00000270949 | 0.493548  | 2.362127 | 0.50845  | 1 RP11-288H12.4 | -      |
| ENSG00000072840 | -0.487379 | 2.398186 | 0.50845  | 1 EVC           | K19605 |
| ENSG00000136243 | -0.438448 | 5.86213  | 0.508506 | 1 NUPL2         | K14321 |
| ENSG00000030110 | -0.44154  | 5.524545 | 0.508558 | 1 BAK1          | K14021 |
| ENSG00000112039 | 0.443128  | 5.077257 | 0.508645 | 1 FANCE         | K10892 |
| ENSG00000170390 | 0.464615  | 3.204308 | 0.508696 | 1 DCLK2         | K08805 |
| ENSG00000197275 | -0.444949 | 4.445489 | 0.508811 | 1 RAD54B        | K10877 |
| ENSG00000197258 | 0.439106  | 5.503502 | 0.509138 | 1 EIF4BP6       | K03258 |
| ENSG00000197933 | 0.480987  | 2.903351 | 0.509345 | 1 ZNF823        | K09228 |
| ENSG00000119673 | -0.442513 | 4.957614 | 0.509348 | 1 ACOT2         | K01068 |
| ENSG00000160752 | -0.432915 | 8.314185 | 0.509385 | 1 FDPS          | K00787 |
| ENSG00000187123 | -0.456047 | 3.806241 | 0.5094   | 1 LYPD6         | -      |
| ENSG00000118496 | -0.445681 | 4.502619 | 0.509485 | 1 FBXO30        | K10307 |
| ENSG00000175548 | -0.458976 | 3.579571 | 0.509547 | 1 ALG10B        | K03850 |
| ENSG00000130147 | 0.439578  | 5.550201 | 0.50967  | 1 SH3BP4        | -      |
| ENSG00000186866 | 0.441786  | 5.266084 | 0.509828 | 1 POFUT2        | K03691 |
| ENSG00000160336 | -0.461163 | 3.615791 | 0.509947 | 1 ZNF761        | -      |
| ENSG00000132819 | -0.445782 | 4.677039 | 0.509971 | 1 RBM38         | -      |
| ENSG00000185730 | -0.459831 | 3.867582 | 0.510076 | 1 ZNF696        | -      |
| ENSG00000122870 | -0.449574 | 4.559446 | 0.510109 | 1 BICC1         | K18756 |
| ENSG00000111696 | -0.457172 | 3.64754  | 0.510327 | 1 NT5DC3        | -      |
| ENSG00000151304 | -0.451601 | 4.102322 | 0.510436 | 1 SRFBP1        | K12581 |
| ENSG00000107371 | -0.436321 | 5.817039 | 0.51047  | 1 EXOSC3        | K03681 |
| ENSG00000168899 | 0.522825  | 1.904401 | 0.510498 | 1 VAMP5         | K08514 |
| ENSG00000135315 | -0.468002 | 3.396295 | 0.510657 | 1 KIAA1009      | K16809 |
| ENSG00000124356 | -0.438751 | 5.611269 | 0.511015 | 1 STAMBP        | K11866 |
| ENSG00000145781 | -0.463178 | 3.43319  | 0.51108  | 1 COMMD10       | -      |
| ENSG00000100522 | -0.432498 | 6.494657 | 0.511118 | 1 GNPAT1        | K00621 |
| ENSG00000176225 | -0.441096 | 4.527484 | 0.511283 | 1 RTTN          | K16484 |
| ENSG00000267060 | -0.657968 | 1.097115 | 0.511408 | 1 PTGES3L       | K07050 |
| ENSG00000137941 | 0.583261  | 1.034525 | 0.511408 | 1 TTLL7         | K16583 |
| ENSG00000176884 | 0.583261  | 1.034525 | 0.511408 | 1 GRIN1         | K05208 |
| ENSG00000109099 | 0.431068  | 7.609656 | 0.511684 | 1 PMP22         | K19289 |
| ENSG00000167799 | -0.498726 | 2.698336 | 0.511765 | 1 NUDT8         | K18665 |
| ENSG00000126088 | -0.43209  | 6.941107 | 0.511856 | 1 UROD          | K01599 |
| ENSG00000150756 | -0.444452 | 4.060872 | 0.512062 | 1 FAM173B       | -      |
| ENSG00000152782 | -0.447101 | 4.272801 | 0.512112 | 1 PANK1         | K09680 |
| ENSG00000174282 | 0.432475  | 6.16902  | 0.512338 | 1 ZBTB4         | K10491 |
| ENSG00000141738 | 0.442248  | 4.487436 | 0.512511 | 1 GRB7          | -      |
| ENSG00000168228 | -0.447437 | 3.590347 | 0.51256  | 1 ZCCHC4        | K17985 |
| ENSG00000154822 | -0.449748 | 4.137563 | 0.512768 | 1 PLCL2         | K15370 |
| ENSG00000124523 | -0.445425 | 4.135033 | 0.512768 | 1 SIRT5         | K11415 |
| ENSG00000223496 | -0.447263 | 3.903    | 0.512822 | 1 EXOSC6        | K12587 |
| ENSG00000164654 | -0.439005 | 4.737337 | 0.51325  | 1 MIOS          | K09228 |
| ENSG00000100889 | -0.431886 | 6.381092 | 0.513312 | 1 PCK2          | K01596 |
| ENSG00000170537 | 0.453436  | 3.30565  | 0.513345 | 1 TMC7          | -      |
| ENSG00000176422 | -0.450417 | 4.207969 | 0.513406 | 1 SPRYD4        | K12581 |
| ENSG00000115204 | 0.434788  | 4.89584  | 0.513426 | 1 MPV17         | K13348 |
| ENSG00000105497 | 0.48179   | 2.861707 | 0.51353  | 1 ZNF175        | K09228 |
| ENSG00000182459 | 0.467459  | 2.868117 | 0.51353  | 1 TEX19         | -      |
| ENSG00000258297 | 0.458516  | 3.349271 | 0.513713 | 1 RP11-658F2.8  | -      |
| ENSG00000180747 | 0.54166   | 1.25285  | 0.513776 | 1 CTD-2547E10.2 | K13780 |
| ENSG00000136295 | 0.431418  | 6.439426 | 0.513833 | 1 TTYH3         | -      |
| ENSG00000134440 | -0.428622 | 7.914462 | 0.513916 | 1 NARS          | K01893 |
| ENSG00000213741 | 0.429494  | 7.002044 | 0.514031 | 1 RPS29         | K02980 |

|                 |           |          |          |                 |        |
|-----------------|-----------|----------|----------|-----------------|--------|
| ENSG00000188483 | -0.432529 | 5.942626 | 0.514057 | 1 IER5L         | -      |
| ENSG00000162639 | -0.436054 | 5.240661 | 0.514166 | 1 HENMT1        | K11847 |
| ENSG00000120533 | -0.42956  | 6.768398 | 0.514672 | 1 ENY2          | K11368 |
| ENSG00000128536 | -0.717439 | 0.034409 | 0.514813 | 1 CDHR3         | K16503 |
| ENSG00000134864 | -0.717439 | 0.034409 | 0.514813 | 1 GGACT         | K19761 |
| ENSG00000188316 | -0.717439 | 0.034409 | 0.514813 | 1 ENO4          | -      |
| ENSG00000231611 | -0.717439 | 0.034409 | 0.514813 | 1 AP006216.11   | -      |
| ENSG00000235734 | -0.717439 | 0.034409 | 0.514813 | 1 HMGN1P36      | K11299 |
| ENSG00000236015 | -0.717439 | 0.034409 | 0.514813 | 1 AC011290.5    | -      |
| ENSG00000236432 | -0.717439 | 0.034409 | 0.514813 | 1 AC097662.2    | -      |
| ENSG00000241170 | -0.717439 | 0.034409 | 0.514813 | 1 RP11-147I3.1  | K02910 |
| ENSG00000259319 | -0.717439 | 0.034409 | 0.514813 | 1 RP11-293M10.6 | -      |
| ENSG00000263350 | -0.717439 | 0.034409 | 0.514813 | 1 RP11-13N13.2  | -      |
| ENSG00000176014 | 0.427615  | 7.845521 | 0.514833 | 1 TUBB6         | K07375 |
| ENSG00000138442 | -0.433709 | 5.731481 | 0.514865 | 1 WDR12         | K14863 |
| ENSG00000128709 | 0.466028  | 3.027242 | 0.514904 | 1 HOXD9         | K09294 |
| ENSG00000123080 | 0.432644  | 5.447207 | 0.514941 | 1 CDKN2C        | K06622 |
| ENSG00000151287 | -0.439554 | 4.949129 | 0.514968 | 1 TEX30         | -      |
| ENSG00000067955 | -0.433721 | 5.564867 | 0.515005 | 1 CBF3          | -      |
| ENSG00000227097 | 0.426889  | 8.5229   | 0.515054 | 1 RP11-742N3.1  | K02979 |
| ENSG00000104805 | 0.42719   | 7.939628 | 0.515166 | 1 NUCB1         | -      |
| ENSG00000205664 | -0.464291 | 3.564921 | 0.515273 | 1 RP11-706O15.1 | K19584 |
| ENSG00000257103 | 0.459449  | 3.085404 | 0.515297 | 1 LSM14A        | K18749 |
| ENSG00000196372 | -0.434223 | 5.511171 | 0.515373 | 1 ASB13         | K10335 |
| ENSG00000120802 | -0.426801 | 8.240735 | 0.515422 | 1 TMPO          | -      |
| ENSG00000169241 | 0.428517  | 6.687663 | 0.515558 | 1 SLC50A1       | K15382 |
| ENSG00000078804 | 0.490465  | 2.476781 | 0.515719 | 1 TP53INP2      | K15310 |
| ENSG00000138650 | 0.490465  | 2.476781 | 0.515719 | 1 PCDH10        | K16499 |
| ENSG00000188825 | 0.490465  | 2.476781 | 0.515719 | 1 LINC00910     | -      |
| ENSG00000134709 | -0.478694 | 2.510107 | 0.515719 | 1 HOOK1         | K16612 |
| ENSG00000180228 | -0.440034 | 4.714179 | 0.515735 | 1 PRKRA         | -      |
| ENSG00000057019 | -0.434937 | 5.200749 | 0.515762 | 1 DCBLD2        | -      |
| ENSG00000116641 | -0.429455 | 6.212503 | 0.516069 | 1 DOCK7         | -      |
| ENSG00000157181 | -0.435186 | 4.953362 | 0.516141 | 1 C1orf27       | -      |
| ENSG00000272335 | 0.441361  | 4.067625 | 0.516372 | 1 RP11-53O19.3  | -      |
| ENSG00000237499 | 0.436711  | 4.404854 | 0.516698 | 1 RP11-356I2.4  | -      |
| ENSG00000141376 | 0.458615  | 3.318803 | 0.516906 | 1 BCAS3         | -      |
| ENSG00000225828 | 0.448285  | 3.323397 | 0.516906 | 1 FAM229A       | -      |
| ENSG00000143942 | -0.438719 | 4.451465 | 0.516951 | 1 CHAC2         | -      |
| ENSG00000048392 | -0.431342 | 5.390096 | 0.516996 | 1 RRM2B         | K10808 |
| ENSG00000137414 | 0.431618  | 5.53037  | 0.517079 | 1 FAM8A1        | -      |
| ENSG00000185022 | -0.434888 | 4.719151 | 0.517112 | 1 MAFF          | K09037 |
| ENSG00000168283 | -0.428313 | 6.234181 | 0.517155 | 1 BMI1          | K11459 |
| ENSG00000116209 | 0.425269  | 7.553892 | 0.517429 | 1 TMEM59        | -      |
| ENSG00000050820 | 0.429593  | 5.987006 | 0.517786 | 1 BCAR1         | K05726 |
| ENSG00000112249 | -0.432411 | 5.528345 | 0.517808 | 1 ASCC3         | K18663 |
| ENSG00000112499 | 0.517798  | 1.691597 | 0.517909 | 1 SLC22A2       | K08199 |
| ENSG00000162946 | 0.517798  | 1.691597 | 0.517909 | 1 DISC1         | K16534 |
| ENSG00000165507 | 0.517798  | 1.691597 | 0.517909 | 1 C10orf10      | -      |
| ENSG00000206535 | -0.497907 | 1.74443  | 0.517909 | 1 LNP1          | -      |
| ENSG00000271781 | -0.497907 | 1.74443  | 0.517909 | 1 CTD-2589H19.6 | -      |
| ENSG00000229950 | 0.484759  | 1.706785 | 0.517909 | 1 TFAP2A-AS1    | -      |
| ENSG00000129355 | 0.467871  | 2.825443 | 0.517975 | 1 CDKN2D        | K06623 |
| ENSG00000107863 | 0.425331  | 7.072279 | 0.518001 | 1 ARHGAP21      | -      |
| ENSG00000146232 | -0.435551 | 4.65457  | 0.518127 | 1 NFKBIE        | K05872 |
| ENSG00000107537 | -0.442555 | 4.034372 | 0.518226 | 1 PHYH          | K00477 |
| ENSG00000101544 | -0.433289 | 4.958997 | 0.518471 | 1 ADNP2         | -      |
| ENSG00000104142 | 0.428305  | 5.650705 | 0.518485 | 1 VPS18         | -      |

|                 |           |           |          |                 |        |
|-----------------|-----------|-----------|----------|-----------------|--------|
| ENSG0000052723  | -0.430084 | 5.374352  | 0.518616 | 1 SIKE1         | K12656 |
| ENSG00000230438 | -0.502147 | 1.870557  | 0.518754 | 1 RP11-420G6.4  | -      |
| ENSG00000273014 | 0.496832  | 1.834     | 0.518754 | 1 RP11-225B17.2 | -      |
| ENSG00000198420 | -0.435608 | 4.496753  | 0.518791 | 1 FAM115A       | -      |
| ENSG00000105364 | -0.425338 | 6.675124  | 0.519012 | 1 MRPL4         | K02926 |
| ENSG00000075142 | -0.424445 | 7.080575  | 0.519094 | 1 SRI           | -      |
| ENSG00000118369 | 0.445829  | 3.736324  | 0.519161 | 1 USP35         | K11854 |
| ENSG00000105246 | -0.5057   | 1.98643   | 0.519446 | 1 EBI3          | -      |
| ENSG00000171865 | -0.433968 | 4.297403  | 0.519528 | 1 RNASEH1       | K03469 |
| ENSG00000269893 | -0.435863 | 4.695696  | 0.519704 | 1 SNHG8         | -      |
| ENSG00000162104 | 0.427002  | 5.792221  | 0.519821 | 1 ADCY9         | K08049 |
| ENSG00000110013 | -0.436781 | 4.743878  | 0.519913 | 1 SIAE          | K05970 |
| ENSG00000196961 | 0.424319  | 6.549051  | 0.51997  | 1 AP2A1         | K11824 |
| ENSG00000203780 | -0.490383 | 2.082492  | 0.520023 | 1 FANK1         | -      |
| ENSG00000110046 | 0.431381  | 4.783886  | 0.52011  | 1 ATG2A         | K17906 |
| ENSG00000147065 | 0.421392  | 9.11853   | 0.520189 | 1 MSN           | -      |
| ENSG00000100354 | 0.43497   | 4.455801  | 0.520229 | 1 TNRC6B        | K17985 |
| ENSG00000159733 | 0.458718  | 3.28768   | 0.520245 | 1 ZFYVE28       | -      |
| ENSG00000145901 | -0.423592 | 6.873693  | 0.520311 | 1 TNIP1         | -      |
| ENSG00000148925 | -0.432794 | 5.147401  | 0.520377 | 1 BTBD10        | K10482 |
| ENSG00000168461 | 0.421417  | 7.996626  | 0.5208   | 1 RAB31         | K07891 |
| ENSG00000140836 | 0.429682  | 5.25923   | 0.520812 | 1 ZFHX3         | -      |
| ENSG00000164902 | -0.425265 | 5.897091  | 0.520829 | 1 PHAX          | K14291 |
| ENSG00000108448 | -0.43528  | 4.164544  | 0.520883 | 1 TRIM16L       | K09228 |
| ENSG00000102547 | -0.497674 | 2.276833  | 0.520927 | 1 CAB39L        | K08272 |
| ENSG00000136104 | -0.42929  | 5.566716  | 0.521026 | 1 RNASEH2B      | K10744 |
| ENSG00000175198 | -0.438929 | 4.212603  | 0.521049 | 1 PCCA          | K01965 |
| ENSG00000106245 | -0.423387 | 6.528269  | 0.521277 | 1 BUD31         | K12873 |
| ENSG00000108272 | -0.671074 | 0.416098  | 0.521385 | 1 DHRS11        | K11447 |
| ENSG00000169621 | -0.671074 | 0.416098  | 0.521385 | 1 APLF          | K13295 |
| ENSG00000258643 | -0.671074 | 0.416098  | 0.521385 | 1 BCL2L2-PABPN1 | K14396 |
| ENSG00000269910 | -0.671074 | 0.416098  | 0.521385 | 1 RP11-73M18.10 | -      |
| ENSG00000272931 | -0.671074 | 0.416098  | 0.521385 | 1 RP5-943J3.2   | -      |
| ENSG00000147697 | 0.586024  | 0.313034  | 0.521385 | 1 GSDMC         | -      |
| ENSG00000177076 | 0.586024  | 0.313034  | 0.521385 | 1 ACER2         | K01441 |
| ENSG00000228812 | 0.586024  | 0.313034  | 0.521385 | 1 RP11-157P1.5  | -      |
| ENSG00000235316 | 0.586024  | 0.313034  | 0.521385 | 1 DUSP8P5       | K04459 |
| ENSG00000258130 | 0.586024  | 0.313034  | 0.521385 | 1 RP11-347C12.3 | K11364 |
| ENSG00000111897 | 0.42263   | 6.644371  | 0.521427 | 1 SERINC1       | K10408 |
| ENSG00000089351 | 0.422638  | 6.6209    | 0.52147  | 1 GRAMD1A       | -      |
| ENSG00000074047 | -0.446185 | 3.657831  | 0.521509 | 1 GLI2          | K16798 |
| ENSG00000180257 | -0.503277 | 2.447888  | 0.5216   | 1 ZNF816        | K09228 |
| ENSG00000269113 | 0.47236   | 2.429448  | 0.5216   | 1 TRABD2B       | -      |
| ENSG00000106415 | 0.426688  | 5.775472  | 0.521697 | 1 GLCCI1        | K03014 |
| ENSG00000058335 | -1.689238 | -1.077996 | 0.521739 | 1 RASGRF1       | K04349 |
| ENSG00000084110 | -1.689238 | -1.077996 | 0.521739 | 1 HAL           | K01745 |
| ENSG00000101222 | -1.689238 | -1.077996 | 0.521739 | 1 SPEF1         | -      |
| ENSG00000102359 | -1.689238 | -1.077996 | 0.521739 | 1 SRPX2         | K19408 |
| ENSG00000104804 | -1.689238 | -1.077996 | 0.521739 | 1 TULP2         | -      |
| ENSG00000121005 | -1.689238 | -1.077996 | 0.521739 | 1 CRISPLD1      | -      |
| ENSG00000123700 | -1.689238 | -1.077996 | 0.521739 | 1 KCNJ2         | K04996 |
| ENSG00000129951 | -1.689238 | -1.077996 | 0.521739 | 1 LPPR3         | K19582 |
| ENSG00000132915 | -1.689238 | -1.077996 | 0.521739 | 1 PDE6A         | K08718 |
| ENSG00000137259 | -1.689238 | -1.077996 | 0.521739 | 1 HIST1H2AB     | K11251 |
| ENSG00000143494 | -1.689238 | -1.077996 | 0.521739 | 1 VASH2         | -      |
| ENSG00000145536 | -1.689238 | -1.077996 | 0.521739 | 1 ADAMTS16      | K08630 |
| ENSG00000146221 | -1.689238 | -1.077996 | 0.521739 | 1 TCTE1         | -      |
| ENSG00000150526 | -1.689238 | -1.077996 | 0.521739 | 1 MIA2          | -      |

|                 |           |           |          |                  |        |
|-----------------|-----------|-----------|----------|------------------|--------|
| ENSG00000154608 | -1.689238 | -1.077996 | 0.521739 | 1 CEP170P1       | K16463 |
| ENSG00000161040 | -1.689238 | -1.077996 | 0.521739 | 1 FBXL13         | K10279 |
| ENSG00000163568 | -1.689238 | -1.077996 | 0.521739 | 1 AIM2           | K12966 |
| ENSG00000167483 | -1.689238 | -1.077996 | 0.521739 | 1 FAM129C        | -      |
| ENSG00000182853 | -1.689238 | -1.077996 | 0.521739 | 1 VMO1           | -      |
| ENSG00000188396 | -1.689238 | -1.077996 | 0.521739 | 1 TCTEX1D4       | -      |
| ENSG00000196176 | -1.689238 | -1.077996 | 0.521739 | 1 HIST1H4A       | K11254 |
| ENSG00000196275 | -1.689238 | -1.077996 | 0.521739 | 1 GTF2IRD2       | K12581 |
| ENSG00000203872 | -1.689238 | -1.077996 | 0.521739 | 1 C6orf163       | -      |
| ENSG00000203942 | -1.689238 | -1.077996 | 0.521739 | 1 C10orf62       | -      |
| ENSG00000214978 | -1.689238 | -1.077996 | 0.521739 | 1 RP11-477N12.3  | K11167 |
| ENSG00000218690 | -1.689238 | -1.077996 | 0.521739 | 1 HIST1H2APS4    | K11251 |
| ENSG00000226266 | -1.689238 | -1.077996 | 0.521739 | 1 AC009961.3     | -      |
| ENSG00000227252 | -1.689238 | -1.077996 | 0.521739 | 1 AC105760.2     | -      |
| ENSG00000227450 | -1.689238 | -1.077996 | 0.521739 | 1 CTB-58E17.5    | -      |
| ENSG00000228196 | -1.689238 | -1.077996 | 0.521739 | 1 PTPN2P1        | K18026 |
| ENSG00000228218 | -1.689238 | -1.077996 | 0.521739 | 1 ATF4P3         | K04374 |
| ENSG00000228802 | -1.689238 | -1.077996 | 0.521739 | 1 AC073641.2     | -      |
| ENSG00000231672 | -1.689238 | -1.077996 | 0.521739 | 1 DIRC3          | -      |
| ENSG00000233250 | -1.689238 | -1.077996 | 0.521739 | 1 RP3-339A18.6   | -      |
| ENSG00000234382 | -1.689238 | -1.077996 | 0.521739 | 1 RP11-40F6.1    | K01896 |
| ENSG00000234911 | -1.689238 | -1.077996 | 0.521739 | 1 TEX21P         | -      |
| ENSG00000239884 | -1.689238 | -1.077996 | 0.521739 | 1 RN7SL608P      | -      |
| ENSG00000242391 | -1.689238 | -1.077996 | 0.521739 | 1 RP4-631H13.2   | -      |
| ENSG00000242866 | -1.689238 | -1.077996 | 0.521739 | 1 STRC           | -      |
| ENSG00000244441 | -1.689238 | -1.077996 | 0.521739 | 1 RP11-359H3.1   | K02915 |
| ENSG00000244607 | -1.689238 | -1.077996 | 0.521739 | 1 CCDC13         | -      |
| ENSG00000246731 | -1.689238 | -1.077996 | 0.521739 | 1 CTD-2514K5.2   | -      |
| ENSG00000248256 | -1.689238 | -1.077996 | 0.521739 | 1 OCIAD1-AS1     | -      |
| ENSG00000251365 | -1.689238 | -1.077996 | 0.521739 | 1 RP11-332J15.3  | -      |
| ENSG00000251563 | -1.689238 | -1.077996 | 0.521739 | 1 AF121898.1     | K01870 |
| ENSG00000259775 | -1.689238 | -1.077996 | 0.521739 | 1 RP11-45P15.4   | -      |
| ENSG00000260814 | -1.689238 | -1.077996 | 0.521739 | 1 RP11-107F6.3   | -      |
| ENSG00000267577 | -1.689238 | -1.077996 | 0.521739 | 1 CTD-2587H24.5  | -      |
| ENSG00000268863 | -1.689238 | -1.077996 | 0.521739 | 1 AC135048.1     | K12408 |
| ENSG00000272368 | -1.689238 | -1.077996 | 0.521739 | 1 RP4-605O3.4    | -      |
| ENSG00000272954 | -1.689238 | -1.077996 | 0.521739 | 1 KB-1440D3.13   | -      |
| ENSG00000007402 | 1.404449  | -1.13734  | 0.521739 | 1 CACNA2D2       | K04859 |
| ENSG00000014914 | 1.404449  | -1.13734  | 0.521739 | 1 MTMR11         | K18085 |
| ENSG00000099769 | 1.404449  | -1.13734  | 0.521739 | 1 IGFALS         | K17256 |
| ENSG00000108654 | 1.404449  | -1.13734  | 0.521739 | 1 DDX5           | K12823 |
| ENSG00000129244 | 1.404449  | -1.13734  | 0.521739 | 1 ATP1B2         | K01540 |
| ENSG00000131779 | 1.404449  | -1.13734  | 0.521739 | 1 PEX11B         | K13352 |
| ENSG00000136274 | 1.404449  | -1.13734  | 0.521739 | 1 NACAD          | K03626 |
| ENSG00000140993 | 1.404449  | -1.13734  | 0.521739 | 1 TIGD7          | -      |
| ENSG00000144785 | 1.404449  | -1.13734  | 0.521739 | 1 RP11-977G19.10 | K01647 |
| ENSG00000158008 | 1.404449  | -1.13734  | 0.521739 | 1 EXTL1          | -      |
| ENSG00000160716 | 1.404449  | -1.13734  | 0.521739 | 1 CHRN2          | K04813 |
| ENSG00000167191 | 1.404449  | -1.13734  | 0.521739 | 1 GPRC5B         | K04619 |
| ENSG00000168481 | 1.404449  | -1.13734  | 0.521739 | 1 LGI3           | -      |
| ENSG00000171766 | 1.404449  | -1.13734  | 0.521739 | 1 GATM           | K00613 |
| ENSG00000176515 | 1.404449  | -1.13734  | 0.521739 | 1 AL033381.1     | -      |
| ENSG00000203827 | 1.404449  | -1.13734  | 0.521739 | 1 NBPF16         | -      |
| ENSG00000205755 | 1.404449  | -1.13734  | 0.521739 | 1 CRLF2          | K05078 |
| ENSG00000205853 | 1.404449  | -1.13734  | 0.521739 | 1 RFPL3S         | -      |
| ENSG00000206228 | 1.404449  | -1.13734  | 0.521739 | 1 HNRNPA1P4      | K12741 |
| ENSG00000222018 | 1.404449  | -1.13734  | 0.521739 | 1 C21orf140      | -      |
| ENSG00000223510 | 1.404449  | -1.13734  | 0.521739 | 1 CDRT15         | -      |

|                 |           |           |          |                  |        |
|-----------------|-----------|-----------|----------|------------------|--------|
| ENSG00000224886 | 1.404449  | -1.13734  | 0.521739 | 1 BEND3P3        | -      |
| ENSG00000225544 | 1.404449  | -1.13734  | 0.521739 | 1 KB-1027C11.4   | -      |
| ENSG00000227373 | 1.404449  | -1.13734  | 0.521739 | 1 RP11-160H22.5  | -      |
| ENSG00000227638 | 1.404449  | -1.13734  | 0.521739 | 1 HNRNPA1P14     | K12741 |
| ENSG00000228201 | 1.404449  | -1.13734  | 0.521739 | 1 AL022341.3     | -      |
| ENSG00000228903 | 1.404449  | -1.13734  | 0.521739 | 1 RASA4CP        | K17630 |
| ENSG00000229472 | 1.404449  | -1.13734  | 0.521739 | 1 RP1-64K7.4     | -      |
| ENSG00000230107 | 1.404449  | -1.13734  | 0.521739 | 1 CTA-126B4.7    | -      |
| ENSG00000230567 | 1.404449  | -1.13734  | 0.521739 | 1 FAM203B        | -      |
| ENSG00000231609 | 1.404449  | -1.13734  | 0.521739 | 1 AC009501.4     | -      |
| ENSG00000232901 | 1.404449  | -1.13734  | 0.521739 | 1 CYCSP10        | K08738 |
| ENSG00000233622 | 1.404449  | -1.13734  | 0.521739 | 1 CYP2T2P        | K07421 |
| ENSG00000234917 | 1.404449  | -1.13734  | 0.521739 | 1 RP5-994D16.3   | -      |
| ENSG00000235837 | 1.404449  | -1.13734  | 0.521739 | 1 AC073333.8     | -      |
| ENSG00000238018 | 1.404449  | -1.13734  | 0.521739 | 1 AC093110.3     | -      |
| ENSG00000240135 | 1.404449  | -1.13734  | 0.521739 | 1 PSMD12P        | K03035 |
| ENSG00000242337 | 1.404449  | -1.13734  | 0.521739 | 1 TFP1           | K14736 |
| ENSG00000248588 | 1.404449  | -1.13734  | 0.521739 | 1 CTC-458G6.4    | -      |
| ENSG00000250900 | 1.404449  | -1.13734  | 0.521739 | 1 CTC-338M12.6   | -      |
| ENSG00000252981 | 1.404449  | -1.13734  | 0.521739 | 1 U3             | -      |
| ENSG00000253837 | 1.404449  | -1.13734  | 0.521739 | 1 RP11-177H13.2  | -      |
| ENSG00000258559 | 1.404449  | -1.13734  | 0.521739 | 1 AC005519.4     | -      |
| ENSG00000259982 | 1.404449  | -1.13734  | 0.521739 | 1 CDC37P1        | K09554 |
| ENSG00000260259 | 1.404449  | -1.13734  | 0.521739 | 1 RP11-368I7.4   | -      |
| ENSG00000260681 | 1.404449  | -1.13734  | 0.521739 | 1 CTA-363E6.5    | -      |
| ENSG00000262296 | 1.404449  | -1.13734  | 0.521739 | 1 RP11-55L4.1    | -      |
| ENSG00000263853 | 1.404449  | -1.13734  | 0.521739 | 1 AC139530.1     | -      |
| ENSG00000263990 | 1.404449  | -1.13734  | 0.521739 | 1 CTC-542B22.2   | -      |
| ENSG00000267649 | 1.404449  | -1.13734  | 0.521739 | 1 CTD-2587H24.10 | -      |
| ENSG00000271843 | 1.404449  | -1.13734  | 0.521739 | 1 RP11-245J9.5   | -      |
| ENSG00000272030 | 1.404449  | -1.13734  | 0.521739 | 1 RP1-178F15.4   | -      |
| ENSG00000272092 | 1.404449  | -1.13734  | 0.521739 | 1 RP11-350N15.5  | -      |
| ENSG00000272792 | 1.404449  | -1.13734  | 0.521739 | 1 RP11-141C7.4   | -      |
| ENSG00000273437 | 1.404449  | -1.13734  | 0.521739 | 1 RP11-434H6.7   | -      |
| ENSG00000188856 | 0.428138  | 4.909083  | 0.521769 | 1 RPSAP47        | K02998 |
| ENSG00000157224 | -0.42633  | 5.604094  | 0.521888 | 1 CLDN12         | K13194 |
| ENSG00000163251 | 0.434773  | 3.775479  | 0.521908 | 1 FZD5           | K02375 |
| ENSG00000163946 | -0.422043 | 6.205421  | 0.522296 | 1 FAM208A        | -      |
| ENSG00000183655 | 0.468309  | 2.781473  | 0.522706 | 1 KLHL25         | K10462 |
| ENSG00000149679 | -0.459234 | 2.801587  | 0.522706 | 1 CABLES2        | -      |
| ENSG00000184220 | -0.42309  | 6.194701  | 0.522759 | 1 CMSS1          | -      |
| ENSG00000170786 | -0.420529 | 7.138589  | 0.522855 | 1 SDR16C5        | K15734 |
| ENSG00000168143 | 0.446337  | 2.898402  | 0.523009 | 1 FAM83B         | -      |
| ENSG00000255135 | 0.446337  | 2.898402  | 0.523009 | 1 RP11-111M22.3  | -      |
| ENSG00000136802 | 0.426755  | 5.4462    | 0.523062 | 1 LRRC8A         | -      |
| ENSG00000205189 | 0.421755  | 6.134384  | 0.523135 | 1 ZBTB10         | K10497 |
| ENSG00000170577 | -0.431017 | 5.016925  | 0.523152 | 1 SIX2           | K19472 |
| ENSG00000109466 | -0.433752 | 4.514091  | 0.523533 | 1 KLHL2          | K10443 |
| ENSG00000138050 | -0.430418 | 4.512154  | 0.523533 | 1 THUMPD2        | -      |
| ENSG00000232119 | -0.420507 | 6.369526  | 0.523553 | 1 MCTS1          | K07575 |
| ENSG00000183020 | 0.422845  | 5.813467  | 0.523708 | 1 AP2A2          | K11824 |
| ENSG00000008438 | -4.235765 | -1.844995 | 0.52381  | 1 PGLYRP1        | K01446 |
| ENSG00000042781 | -4.235765 | -1.844995 | 0.52381  | 1 USH2A          | K19636 |
| ENSG00000073282 | -4.235765 | -1.844995 | 0.52381  | 1 TP63           | K10149 |
| ENSG00000079263 | -4.235765 | -1.844995 | 0.52381  | 1 SP140          | -      |
| ENSG00000084453 | -4.235765 | -1.844995 | 0.52381  | 1 SLCO1A2        | K03460 |
| ENSG00000086570 | -4.235765 | -1.844995 | 0.52381  | 1 FAT2           | K16506 |
| ENSG00000088538 | -4.235765 | -1.844995 | 0.52381  | 1 DOCK3          | K05727 |

|                 |           |           |         |                 |        |
|-----------------|-----------|-----------|---------|-----------------|--------|
| ENSG00000104361 | -4.235765 | -1.844995 | 0.52381 | 1 NIPAL2        | -      |
| ENSG00000113578 | -4.235765 | -1.844995 | 0.52381 | 1 FGF1          | K18496 |
| ENSG00000115523 | -4.235765 | -1.844995 | 0.52381 | 1 GNLY          | -      |
| ENSG00000116194 | -4.235765 | -1.844995 | 0.52381 | 1 ANGPTL1       | -      |
| ENSG00000118990 | -4.235765 | -1.844995 | 0.52381 | 1 GLRXP3        | K03676 |
| ENSG00000121406 | -4.235765 | -1.844995 | 0.52381 | 1 ZNF549        | K09228 |
| ENSG00000123329 | -4.235765 | -1.844995 | 0.52381 | 1 ARHGAP9       | -      |
| ENSG00000123575 | -4.235765 | -1.844995 | 0.52381 | 1 FAM199X       | -      |
| ENSG00000124257 | -4.235765 | -1.844995 | 0.52381 | 1 NEURL2        | K16782 |
| ENSG00000125409 | -4.235765 | -1.844995 | 0.52381 | 1 TEKT3         | K18630 |
| ENSG00000126012 | -4.235765 | -1.844995 | 0.52381 | 1 KDM5C         | K11446 |
| ENSG00000129009 | -4.235765 | -1.844995 | 0.52381 | 1 ISLR          | -      |
| ENSG00000131016 | -4.235765 | -1.844995 | 0.52381 | 1 AKAP12        | K16528 |
| ENSG00000139971 | -4.235765 | -1.844995 | 0.52381 | 1 C14orf37      | -      |
| ENSG00000140932 | -4.235765 | -1.844995 | 0.52381 | 1 CMTM2         | -      |
| ENSG00000141052 | -4.235765 | -1.844995 | 0.52381 | 1 MYOCD         | -      |
| ENSG00000141150 | -4.235765 | -1.844995 | 0.52381 | 1 RASL10B       | K02927 |
| ENSG00000143355 | -4.235765 | -1.844995 | 0.52381 | 1 LHX9          | K09373 |
| ENSG00000145675 | -4.235765 | -1.844995 | 0.52381 | 1 PIK3R1        | K02649 |
| ENSG00000145700 | -4.235765 | -1.844995 | 0.52381 | 1 ANKRD31       | -      |
| ENSG00000145757 | -4.235765 | -1.844995 | 0.52381 | 1 SPATA9        | -      |
| ENSG00000147488 | -4.235765 | -1.844995 | 0.52381 | 1 ST18          | -      |
| ENSG00000149927 | -4.235765 | -1.844995 | 0.52381 | 1 DOC2A         | -      |
| ENSG00000152128 | -4.235765 | -1.844995 | 0.52381 | 1 TMEM163       | -      |
| ENSG00000152661 | -4.235765 | -1.844995 | 0.52381 | 1 GJA1          | K07372 |
| ENSG00000153208 | -4.235765 | -1.844995 | 0.52381 | 1 MERTK         | K05117 |
| ENSG00000160179 | -4.235765 | -1.844995 | 0.52381 | 1 ABCG1         | K05679 |
| ENSG00000161896 | -4.235765 | -1.844995 | 0.52381 | 1 IP6K3         | K07756 |
| ENSG00000162438 | -4.235765 | -1.844995 | 0.52381 | 1 CTRC          | K01311 |
| ENSG00000162460 | -4.235765 | -1.844995 | 0.52381 | 1 TMEM82        | -      |
| ENSG00000162551 | -4.235765 | -1.844995 | 0.52381 | 1 ALPL          | K01077 |
| ENSG00000163879 | -4.235765 | -1.844995 | 0.52381 | 1 DNALI1        | K10410 |
| ENSG00000164385 | -4.235765 | -1.844995 | 0.52381 | 1 C6orf195      | -      |
| ENSG00000164512 | -4.235765 | -1.844995 | 0.52381 | 1 ANKRD55       | -      |
| ENSG00000166432 | -4.235765 | -1.844995 | 0.52381 | 1 ZMAT1         | -      |
| ENSG00000166667 | -4.235765 | -1.844995 | 0.52381 | 1 SPDYE6        | K08694 |
| ENSG00000167178 | -4.235765 | -1.844995 | 0.52381 | 1 ISLR2         | -      |
| ENSG00000168060 | -4.235765 | -1.844995 | 0.52381 | 1 NAALADL1      | K01301 |
| ENSG00000168367 | -4.235765 | -1.844995 | 0.52381 | 1 LINC00917     | -      |
| ENSG00000171121 | -4.235765 | -1.844995 | 0.52381 | 1 KCNMB3        | K04939 |
| ENSG00000173811 | -4.235765 | -1.844995 | 0.52381 | 1 CCDC13-AS1    | -      |
| ENSG00000174844 | -4.235765 | -1.844995 | 0.52381 | 1 DNAH12        | K10408 |
| ENSG00000174992 | -4.235765 | -1.844995 | 0.52381 | 1 ZG16          | K12581 |
| ENSG00000175147 | -4.235765 | -1.844995 | 0.52381 | 1 TMEM51-AS1    | -      |
| ENSG00000175518 | -4.235765 | -1.844995 | 0.52381 | 1 UBQLNL        | K04523 |
| ENSG00000176009 | -4.235765 | -1.844995 | 0.52381 | 1 ASCL3         | K09067 |
| ENSG00000176746 | -4.235765 | -1.844995 | 0.52381 | 1 MAGEB6        | -      |
| ENSG00000177770 | -4.235765 | -1.844995 | 0.52381 | 1 CDKN2AIPNLP1  | -      |
| ENSG00000179133 | -4.235765 | -1.844995 | 0.52381 | 1 C10orf67      | -      |
| ENSG00000181819 | -4.235765 | -1.844995 | 0.52381 | 1 KCTD9P2       | -      |
| ENSG00000182611 | -4.235765 | -1.844995 | 0.52381 | 1 HIST1H2AJ     | K11251 |
| ENSG00000183571 | -4.235765 | -1.844995 | 0.52381 | 1 PGPEP1L       | -      |
| ENSG00000183801 | -4.235765 | -1.844995 | 0.52381 | 1 OLFML1        | -      |
| ENSG00000184530 | -4.235765 | -1.844995 | 0.52381 | 1 C6orf58       | -      |
| ENSG00000184838 | -4.235765 | -1.844995 | 0.52381 | 1 PRR16         | K02159 |
| ENSG00000185015 | -4.235765 | -1.844995 | 0.52381 | 1 CA13          | K01672 |
| ENSG00000185296 | -4.235765 | -1.844995 | 0.52381 | 1 CTD-2139B15.1 | K16830 |
| ENSG00000185990 | -4.235765 | -1.844995 | 0.52381 | 1 F8A3          | -      |

|                 |           |           |         |                 |        |
|-----------------|-----------|-----------|---------|-----------------|--------|
| ENSG00000186038 | -4.235765 | -1.844995 | 0.52381 | 1 HTR3E         | K04819 |
| ENSG00000188032 | -4.235765 | -1.844995 | 0.52381 | 1 C19orf67      | -      |
| ENSG00000196266 | -4.235765 | -1.844995 | 0.52381 | 1 OR10J3        | K04257 |
| ENSG00000196302 | -4.235765 | -1.844995 | 0.52381 | 1 RP11-497H16.5 | K01195 |
| ENSG00000197497 | -4.235765 | -1.844995 | 0.52381 | 1 ZNF665        | K17985 |
| ENSG00000197859 | -4.235765 | -1.844995 | 0.52381 | 1 ADAMTSL2      | -      |
| ENSG00000198570 | -4.235765 | -1.844995 | 0.52381 | 1 RD3           | K09228 |
| ENSG00000198744 | -4.235765 | -1.844995 | 0.52381 | 1 RP5-857K21.11 | K02262 |
| ENSG00000199900 | -4.235765 | -1.844995 | 0.52381 | 1 RNA5SP463     | -      |
| ENSG00000200924 | -4.235765 | -1.844995 | 0.52381 | 1 RNU6-1048P    | -      |
| ENSG00000202078 | -4.235765 | -1.844995 | 0.52381 | 1 Y_RNA         | -      |
| ENSG00000202358 | -4.235765 | -1.844995 | 0.52381 | 1 RNU6-652P     | -      |
| ENSG00000203443 | -4.235765 | -1.844995 | 0.52381 | 1 AC092964.1    | K16467 |
| ENSG00000203546 | -4.235765 | -1.844995 | 0.52381 | 1 RP11-176H8.1  | K12581 |
| ENSG00000203721 | -4.235765 | -1.844995 | 0.52381 | 1 LINC00862     | -      |
| ENSG00000203886 | -4.235765 | -1.844995 | 0.52381 | 1 CYP17A1-AS1   | -      |
| ENSG00000203910 | -4.235765 | -1.844995 | 0.52381 | 1 C1orf146      | K10408 |
| ENSG00000204177 | -4.235765 | -1.844995 | 0.52381 | 1 BMS1P1        | K14569 |
| ENSG00000204532 | -4.235765 | -1.844995 | 0.52381 | 1 ZSCAN5C       | K09230 |
| ENSG00000205236 | -4.235765 | -1.844995 | 0.52381 | 1 RP11-514P8.6  | K17630 |
| ENSG00000205300 | -4.235765 | -1.844995 | 0.52381 | 1 RP11-352D3.2  | -      |
| ENSG00000205578 | -4.235765 | -1.844995 | 0.52381 | 1 POM121B       | K14316 |
| ENSG00000206633 | -4.235765 | -1.844995 | 0.52381 | 1 SNORA80B      | -      |
| ENSG00000206878 | -4.235765 | -1.844995 | 0.52381 | 1 SNORA51       | -      |
| ENSG00000207399 | -4.235765 | -1.844995 | 0.52381 | 1 RNU6-1011P    | -      |
| ENSG00000207457 | -4.235765 | -1.844995 | 0.52381 | 1 RNU6-476P     | -      |
| ENSG00000207468 | -4.235765 | -1.844995 | 0.52381 | 1 SNORA19       | -      |
| ENSG00000207944 | -4.235765 | -1.844995 | 0.52381 | 1 MIR574        | -      |
| ENSG00000213221 | -4.235765 | -1.844995 | 0.52381 | 1 DNLZ          | K17808 |
| ENSG00000213958 | -4.235765 | -1.844995 | 0.52381 | 1 KRT18P29      | K07604 |
| ENSG00000213967 | -4.235765 | -1.844995 | 0.52381 | 1 ZNF726        | K09228 |
| ENSG00000214694 | -4.235765 | -1.844995 | 0.52381 | 1 ARHGEF33      | -      |
| ENSG00000214810 | -4.235765 | -1.844995 | 0.52381 | 1 CYCSP55       | K08738 |
| ENSG00000215241 | -4.235765 | -1.844995 | 0.52381 | 1 RP11-266K4.9  | -      |
| ENSG00000215527 | -4.235765 | -1.844995 | 0.52381 | 1 AP005482.1    | -      |
| ENSG00000216359 | -4.235765 | -1.844995 | 0.52381 | 1 RP11-360O19.1 | K00742 |
| ENSG00000217027 | -4.235765 | -1.844995 | 0.52381 | 1 TPT1P4        | -      |
| ENSG00000218048 | -4.235765 | -1.844995 | 0.52381 | 1 RP3-407E4.4   | -      |
| ENSG00000221241 | -4.235765 | -1.844995 | 0.52381 | 1 SNORD88A      | -      |
| ENSG00000221555 | -4.235765 | -1.844995 | 0.52381 | 1 AC068669.1    | -      |
| ENSG00000223678 | -4.235765 | -1.844995 | 0.52381 | 1 RP11-311H10.4 | -      |
| ENSG00000223703 | -4.235765 | -1.844995 | 0.52381 | 1 AC027612.4    | K06522 |
| ENSG00000224451 | -4.235765 | -1.844995 | 0.52381 | 1 ATP5F1P1      | K02127 |
| ENSG00000224459 | -4.235765 | -1.844995 | 0.52381 | 1 RP11-169K16.4 | -      |
| ENSG00000224595 | -4.235765 | -1.844995 | 0.52381 | 1 AC073626.2    | -      |
| ENSG00000224621 | -4.235765 | -1.844995 | 0.52381 | 1 RP11-276H7.3  | -      |
| ENSG00000224746 | -4.235765 | -1.844995 | 0.52381 | 1 AC015987.1    | -      |
| ENSG00000225419 | -4.235765 | -1.844995 | 0.52381 | 1 RPL21P3       | K02889 |
| ENSG00000225434 | -4.235765 | -1.844995 | 0.52381 | 1 RP11-63P12.6  | -      |
| ENSG00000225527 | -4.235765 | -1.844995 | 0.52381 | 1 RP11-383B4.4  | -      |
| ENSG00000226701 | -4.235765 | -1.844995 | 0.52381 | 1 RP11-570G20.1 | K02877 |
| ENSG00000226781 | -4.235765 | -1.844995 | 0.52381 | 1 TBCAP1        | K17292 |
| ENSG00000226856 | -4.235765 | -1.844995 | 0.52381 | 1 AC093901.1    | -      |
| ENSG00000227558 | -4.235765 | -1.844995 | 0.52381 | 1 PGM5P2        | K15636 |
| ENSG00000227591 | -4.235765 | -1.844995 | 0.52381 | 1 RP1-28O10.1   | -      |
| ENSG00000227973 | -4.235765 | -1.844995 | 0.52381 | 1 PIN4P1        | K09579 |
| ENSG00000228208 | -4.235765 | -1.844995 | 0.52381 | 1 C1orf143      | -      |
| ENSG00000228327 | -4.235765 | -1.844995 | 0.52381 | 1 RP11-206L10.2 | -      |



|                 |           |           |         |                 |        |
|-----------------|-----------|-----------|---------|-----------------|--------|
| ENSG00000228604 | -4.235765 | -1.844995 | 0.52381 | 1 RP5-872K7.7   | -      |
| ENSG00000228707 | -4.235765 | -1.844995 | 0.52381 | 1 RP11-787B4.2  | -      |
| ENSG00000228818 | -4.235765 | -1.844995 | 0.52381 | 1 RP11-567G24.1 | K03028 |
| ENSG00000229105 | -4.235765 | -1.844995 | 0.52381 | 1 RP11-264C15.2 | -      |
| ENSG00000229526 | -4.235765 | -1.844995 | 0.52381 | 1 KRT16P4       | K07604 |
| ENSG00000229800 | -4.235765 | -1.844995 | 0.52381 | 1 ATP8A2P2      | K14802 |
| ENSG00000229841 | -4.235765 | -1.844995 | 0.52381 | 1 RP11-361K17.2 | -      |
| ENSG00000229955 | -4.235765 | -1.844995 | 0.52381 | 1 RP1-5O6.4     | -      |
| ENSG00000230533 | -4.235765 | -1.844995 | 0.52381 | 1 RP11-95M15.1  | -      |
| ENSG00000230604 | -4.235765 | -1.844995 | 0.52381 | 1 TSEN15P2      | K15324 |
| ENSG00000230807 | -4.235765 | -1.844995 | 0.52381 | 1 AC099535.4    | K02927 |
| ENSG00000231028 | -4.235765 | -1.844995 | 0.52381 | 1 LINC00271     | -      |
| ENSG00000231298 | -4.235765 | -1.844995 | 0.52381 | 1 LINC00704     | -      |
| ENSG00000231369 | -4.235765 | -1.844995 | 0.52381 | 1 RP1-40G4P.1   | K02877 |
| ENSG00000231724 | -4.235765 | -1.844995 | 0.52381 | 1 RP11-573D15.3 | -      |
| ENSG00000232194 | -4.235765 | -1.844995 | 0.52381 | 1 RP1-313L4.3   | -      |
| ENSG00000232621 | -4.235765 | -1.844995 | 0.52381 | 1 C4BPAP2       | K04002 |
| ENSG00000232684 | -4.235765 | -1.844995 | 0.52381 | 1 ATP11A-AS1    | -      |
| ENSG00000232862 | -4.235765 | -1.844995 | 0.52381 | 1 RP4-665N4.4   | K19478 |
| ENSG00000233052 | -4.235765 | -1.844995 | 0.52381 | 1 RP11-398B16.2 | -      |
| ENSG00000233108 | -4.235765 | -1.844995 | 0.52381 | 1 AC006042.7    | -      |
| ENSG00000233776 | -4.235765 | -1.844995 | 0.52381 | 1 RP11-384P7.6  | -      |
| ENSG00000233783 | -4.235765 | -1.844995 | 0.52381 | 1 AP001442.2    | -      |
| ENSG00000233998 | -4.235765 | -1.844995 | 0.52381 | 1 SETP5         | K11290 |
| ENSG00000234141 | -4.235765 | -1.844995 | 0.52381 | 1 AC009473.1    | -      |
| ENSG00000234409 | -4.235765 | -1.844995 | 0.52381 | 1 AC006547.14   | -      |
| ENSG00000235029 | -4.235765 | -1.844995 | 0.52381 | 1 MNX1-AS2      | -      |
| ENSG00000235354 | -4.235765 | -1.844995 | 0.52381 | 1 CTA-276O3.4   | K02980 |
| ENSG00000235652 | -4.235765 | -1.844995 | 0.52381 | 1 RP11-545I5.3  | -      |
| ENSG00000235703 | -4.235765 | -1.844995 | 0.52381 | 1 LINC00894     | -      |
| ENSG00000236013 | -4.235765 | -1.844995 | 0.52381 | 1 RP3-332B22.1  | -      |
| ENSG00000236417 | -4.235765 | -1.844995 | 0.52381 | 1 CTSLP1        | K01365 |
| ENSG00000236824 | -4.235765 | -1.844995 | 0.52381 | 1 BCYRN1        | -      |
| ENSG00000236866 | -4.235765 | -1.844995 | 0.52381 | 1 AL157902.3    | -      |
| ENSG00000237232 | -4.235765 | -1.844995 | 0.52381 | 1 ZNF295-AS1    | -      |
| ENSG00000237721 | -4.235765 | -1.844995 | 0.52381 | 1 AF064858.11   | -      |
| ENSG00000237805 | -4.235765 | -1.844995 | 0.52381 | 1 AC015849.2    | -      |
| ENSG00000237848 | -4.235765 | -1.844995 | 0.52381 | 1 RP11-739N20.3 | K11098 |
| ENSG00000237877 | -4.235765 | -1.844995 | 0.52381 | 1 AC097500.2    | -      |
| ENSG00000238109 | -4.235765 | -1.844995 | 0.52381 | 1 AC004893.10   | K11971 |
| ENSG00000238549 | -4.235765 | -1.844995 | 0.52381 | 1 snoU13        | -      |
| ENSG00000240429 | -4.235765 | -1.844995 | 0.52381 | 1 LRRFIP1P1     | K17785 |
| ENSG00000240718 | -4.235765 | -1.844995 | 0.52381 | 1 RN7SL851P     | -      |
| ENSG00000240739 | -4.235765 | -1.844995 | 0.52381 | 1 RP11-69M1.1   | -      |
| ENSG00000240823 | -4.235765 | -1.844995 | 0.52381 | 1 RN7SL23P      | -      |
| ENSG00000241150 | -4.235765 | -1.844995 | 0.52381 | 1 RP11-308D16.2 | K17086 |
| ENSG00000241720 | -4.235765 | -1.844995 | 0.52381 | 1 RP4-735C1.4   | -      |
| ENSG00000241933 | -4.235765 | -1.844995 | 0.52381 | 1 RP11-755B10.3 | -      |
| ENSG00000243636 | -4.235765 | -1.844995 | 0.52381 | 1 RP11-164O23.7 | -      |
| ENSG00000243979 | -4.235765 | -1.844995 | 0.52381 | 1 RP11-347C18.1 | K02880 |
| ENSG00000244184 | -4.235765 | -1.844995 | 0.52381 | 1 RP11-314A20.2 | -      |
| ENSG00000244291 | -4.235765 | -1.844995 | 0.52381 | 1 C7orf13       | -      |
| ENSG00000246740 | -4.235765 | -1.844995 | 0.52381 | 1 CTD-2382E5.1  | -      |
| ENSG00000247151 | -4.235765 | -1.844995 | 0.52381 | 1 CSTF3-AS1     | -      |
| ENSG00000248884 | -4.235765 | -1.844995 | 0.52381 | 1 CTC-537E7.3   | -      |
| ENSG00000248896 | -4.235765 | -1.844995 | 0.52381 | 1 CTD-2135J3.3  | -      |
| ENSG00000248908 | -4.235765 | -1.844995 | 0.52381 | 1 RP11-730N24.1 | -      |
| ENSG00000248964 | -4.235765 | -1.844995 | 0.52381 | 1 RP11-94H18.1  | -      |

|                 |           |           |         |                  |        |
|-----------------|-----------|-----------|---------|------------------|--------|
| ENSG00000249326 | -4.235765 | -1.844995 | 0.52381 | 1 CTD-2194D22.4  | -      |
| ENSG00000250444 | -4.235765 | -1.844995 | 0.52381 | 1 CCT5P1         | K09497 |
| ENSG00000251018 | -4.235765 | -1.844995 | 0.52381 | 1 RP11-80G7.1    | -      |
| ENSG00000251271 | -4.235765 | -1.844995 | 0.52381 | 1 ALG1L7P        | K03842 |
| ENSG00000251821 | -4.235765 | -1.844995 | 0.52381 | 1 RNU6-583P      | -      |
| ENSG00000251969 | -4.235765 | -1.844995 | 0.52381 | 1 AL356776.1     | -      |
| ENSG00000252579 | -4.235765 | -1.844995 | 0.52381 | 1 RNU7-117P      | -      |
| ENSG00000252797 | -4.235765 | -1.844995 | 0.52381 | 1 RN7SKP272      | -      |
| ENSG00000252827 | -4.235765 | -1.844995 | 0.52381 | 1 RN7SKP11       | -      |
| ENSG00000253273 | -4.235765 | -1.844995 | 0.52381 | 1 RP11-99A14.1   | K16449 |
| ENSG00000253595 | -4.235765 | -1.844995 | 0.52381 | 1 CTD-3064M3.1   | -      |
| ENSG00000253848 | -4.235765 | -1.844995 | 0.52381 | 1 RP11-10N23.5   | -      |
| ENSG00000253910 | -4.235765 | -1.844995 | 0.52381 | 1 PCDHGB2        | K16496 |
| ENSG00000253971 | -4.235765 | -1.844995 | 0.52381 | 1 CDC42P3        | K04393 |
| ENSG00000254693 | -4.235765 | -1.844995 | 0.52381 | 1 RP11-58K22.5   | -      |
| ENSG00000254694 | -4.235765 | -1.844995 | 0.52381 | 1 RP11-50B3.4    | -      |
| ENSG00000255085 | -4.235765 | -1.844995 | 0.52381 | 1 AF186192.5     | K09228 |
| ENSG00000255439 | -4.235765 | -1.844995 | 0.52381 | 1 RP11-196G11.1  | K05357 |
| ENSG00000255553 | -4.235765 | -1.844995 | 0.52381 | 1 RP11-810P12.5  | -      |
| ENSG00000255629 | -4.235765 | -1.844995 | 0.52381 | 1 RP11-196H14.3  | -      |
| ENSG00000256812 | -4.235765 | -1.844995 | 0.52381 | 1 CAPNS2         | K08584 |
| ENSG00000257496 | -4.235765 | -1.844995 | 0.52381 | 1 RP11-474P2.4   | -      |
| ENSG00000257790 | -4.235765 | -1.844995 | 0.52381 | 1 RP11-1136G11.6 | K03257 |
| ENSG00000257831 | -4.235765 | -1.844995 | 0.52381 | 1 RP11-596D21.1  | -      |
| ENSG00000257941 | -4.235765 | -1.844995 | 0.52381 | 1 RP11-290L1.4   | -      |
| ENSG00000258044 | -4.235765 | -1.844995 | 0.52381 | 1 RP11-530C5.2   | -      |
| ENSG00000258199 | -4.235765 | -1.844995 | 0.52381 | 1 RP11-977G19.5  | -      |
| ENSG00000258210 | -4.235765 | -1.844995 | 0.52381 | 1 RP11-478C19.2  | -      |
| ENSG00000258458 | -4.235765 | -1.844995 | 0.52381 | 1 CTD-2555K7.2   | -      |
| ENSG00000258466 | -4.235765 | -1.844995 | 0.52381 | 1 RP11-1012A1.4  | K11152 |
| ENSG00000258526 | -4.235765 | -1.844995 | 0.52381 | 1 RP11-111A21.1  | -      |
| ENSG00000258583 | -4.235765 | -1.844995 | 0.52381 | 1 RP11-112J1.2   | -      |
| ENSG00000259138 | -4.235765 | -1.844995 | 0.52381 | 1 RP11-950C14.7  | -      |
| ENSG00000259151 | -4.235765 | -1.844995 | 0.52381 | 1 CAP2P1         | K17261 |
| ENSG00000259364 | -4.235765 | -1.844995 | 0.52381 | 1 RP11-64K12.9   | -      |
| ENSG00000259450 | -4.235765 | -1.844995 | 0.52381 | 1 RP11-265N7.1   | -      |
| ENSG00000259469 | -4.235765 | -1.844995 | 0.52381 | 1 RP11-227D13.4  | -      |
| ENSG00000259472 | -4.235765 | -1.844995 | 0.52381 | 1 RP13-996F3.3   | K08622 |
| ENSG00000259642 | -4.235765 | -1.844995 | 0.52381 | 1 C15orf37       | K16580 |
| ENSG00000259796 | -4.235765 | -1.844995 | 0.52381 | 1 RP11-355I22.7  | -      |
| ENSG00000259931 | -4.235765 | -1.844995 | 0.52381 | 1 CTD-2323K18.2  | K11098 |
| ENSG00000260541 | -4.235765 | -1.844995 | 0.52381 | 1 LA16c-429E7.1  | -      |
| ENSG00000260588 | -4.235765 | -1.844995 | 0.52381 | 1 RP11-930P14.2  | -      |
| ENSG00000260648 | -4.235765 | -1.844995 | 0.52381 | 1 RP11-133K1.7   | -      |
| ENSG00000260782 | -4.235765 | -1.844995 | 0.52381 | 1 RP11-480G7.2   | K09040 |
| ENSG00000260996 | -4.235765 | -1.844995 | 0.52381 | 1 RP13-122B23.8  | -      |
| ENSG00000261072 | -4.235765 | -1.844995 | 0.52381 | 1 RP11-5N19.3    | K00022 |
| ENSG00000261357 | -4.235765 | -1.844995 | 0.52381 | 1 RP11-626G11.1  | -      |
| ENSG00000261471 | -4.235765 | -1.844995 | 0.52381 | 1 RP11-61F12.1   | -      |
| ENSG00000261550 | -4.235765 | -1.844995 | 0.52381 | 1 RP11-467J12.4  | -      |
| ENSG00000261864 | -4.235765 | -1.844995 | 0.52381 | 1 RP11-67A1.2    | -      |
| ENSG00000262188 | -4.235765 | -1.844995 | 0.52381 | 1 RP11-353N14.4  | -      |
| ENSG00000264229 | -4.235765 | -1.844995 | 0.52381 | 1 RNU4ATAC       | -      |
| ENSG00000264743 | -4.235765 | -1.844995 | 0.52381 | 1 DPRXP4         | -      |
| ENSG00000264829 | -4.235765 | -1.844995 | 0.52381 | 1 RP11-474I11.8  | -      |
| ENSG00000264937 | -4.235765 | -1.844995 | 0.52381 | 1 AC100830.5     | -      |
| ENSG00000265888 | -4.235765 | -1.844995 | 0.52381 | 1 RP11-408H20.2  | -      |
| ENSG00000266347 | -4.235765 | -1.844995 | 0.52381 | 1 AC068641.1     | -      |

|                 |           |           |          |                  |        |
|-----------------|-----------|-----------|----------|------------------|--------|
| ENSG00000266602 | -4.235765 | -1.844995 | 0.52381  | 1 RP11-476K15.1  | -      |
| ENSG00000267138 | -4.235765 | -1.844995 | 0.52381  | 1 AC005954.3     | -      |
| ENSG00000267150 | -4.235765 | -1.844995 | 0.52381  | 1 RP11-411B10.2  | -      |
| ENSG00000267197 | -4.235765 | -1.844995 | 0.52381  | 1 CTC-429L19.3   | -      |
| ENSG00000267323 | -4.235765 | -1.844995 | 0.52381  | 1 SLC25A1P5      | K15100 |
| ENSG00000267356 | -4.235765 | -1.844995 | 0.52381  | 1 RP11-411B10.3  | -      |
| ENSG00000267501 | -4.235765 | -1.844995 | 0.52381  | 1 RP11-108P20.2  | -      |
| ENSG00000267959 | -4.235765 | -1.844995 | 0.52381  | 1 MIR3188        | -      |
| ENSG00000268047 | -4.235765 | -1.844995 | 0.52381  | 1 AC018766.6     | -      |
| ENSG00000268297 | -4.235765 | -1.844995 | 0.52381  | 1 CLEC4GP1       | K10061 |
| ENSG00000269161 | -4.235765 | -1.844995 | 0.52381  | 1 CTD-3131K8.3   | -      |
| ENSG00000269202 | -4.235765 | -1.844995 | 0.52381  | 1 RP4-614O4.12   | -      |
| ENSG00000269296 | -4.235765 | -1.844995 | 0.52381  | 1 AC005614.3     | -      |
| ENSG00000269559 | -4.235765 | -1.844995 | 0.52381  | 1 AC093677.1     | K13403 |
| ENSG00000269700 | -4.235765 | -1.844995 | 0.52381  | 1 AC069547.2     | -      |
| ENSG00000269921 | -4.235765 | -1.844995 | 0.52381  | 1 RP11-646I6.5   | -      |
| ENSG00000269980 | -4.235765 | -1.844995 | 0.52381  | 1 RP11-282O18.7  | -      |
| ENSG00000270021 | -4.235765 | -1.844995 | 0.52381  | 1 CTC-203F4.2    | -      |
| ENSG00000270503 | -4.235765 | -1.844995 | 0.52381  | 1 RP11-407N17.6  | -      |
| ENSG00000270571 | -4.235765 | -1.844995 | 0.52381  | 1 RP11-355F16.1  | -      |
| ENSG00000270781 | -4.235765 | -1.844995 | 0.52381  | 1 RP11-501C14.9  | K02922 |
| ENSG00000270983 | -4.235765 | -1.844995 | 0.52381  | 1 RP11-137J7.3   | K10685 |
| ENSG00000271218 | -4.235765 | -1.844995 | 0.52381  | 1 RP3-523E19.2   | -      |
| ENSG00000271803 | -4.235765 | -1.844995 | 0.52381  | 1 RP1-63M2.5     | -      |
| ENSG00000271816 | -4.235765 | -1.844995 | 0.52381  | 1 RP11-574K11.28 | -      |
| ENSG00000271967 | -4.235765 | -1.844995 | 0.52381  | 1 RP11-134K13.4  | -      |
| ENSG00000272048 | -4.235765 | -1.844995 | 0.52381  | 1 RP11-458N5.1   | -      |
| ENSG00000272071 | -4.235765 | -1.844995 | 0.52381  | 1 RP11-332J15.4  | -      |
| ENSG00000272622 | -4.235765 | -1.844995 | 0.52381  | 1 RP11-395N3.2   | -      |
| ENSG00000272647 | -4.235765 | -1.844995 | 0.52381  | 1 GS1-259H13.10  | K09229 |
| ENSG00000272884 | -4.235765 | -1.844995 | 0.52381  | 1 RP11-104H15.10 | -      |
| ENSG00000272894 | -4.235765 | -1.844995 | 0.52381  | 1 RP5-1159O4.1   | -      |
| ENSG00000273010 | -4.235765 | -1.844995 | 0.52381  | 1 RP11-96K19.5   | -      |
| ENSG00000273073 | -4.235765 | -1.844995 | 0.52381  | 1 RP11-109E12.1  | -      |
| ENSG00000273348 | -4.235765 | -1.844995 | 0.52381  | 1 RP11-535A5.1   | -      |
| ENSG00000273432 | -4.235765 | -1.844995 | 0.52381  | 1 RP5-1165K10.2  | -      |
| ENSG00000116141 | -0.441468 | 3.318857  | 0.523815 | 1 MARK1          | K08798 |
| ENSG00000072849 | -0.424741 | 5.473245  | 0.523911 | 1 DERL2          | K13989 |
| ENSG00000153485 | -0.452984 | 3.484814  | 0.524074 | 1 TMEM251        | -      |
| ENSG00000072756 | -0.427982 | 5.034388  | 0.524273 | 1 TRNT1          | K00974 |
| ENSG00000018189 | -0.437983 | 3.702146  | 0.524364 | 1 RUFY3          | K12482 |
| ENSG00000156831 | -0.42473  | 5.148622  | 0.524402 | 1 NSMCE2         | -      |
| ENSG00000172638 | -0.644465 | 0.71657   | 0.524474 | 1 EFEMP2         | K08569 |
| ENSG00000213250 | -0.644465 | 0.71657   | 0.524474 | 1 RBMS2P1        | -      |
| ENSG00000233381 | -0.644465 | 0.71657   | 0.524474 | 1 AK4P3          | K00939 |
| ENSG00000261139 | -0.644465 | 0.71657   | 0.524474 | 1 CTD-2517M14.5  | -      |
| ENSG00000168779 | -0.594136 | 0.685575  | 0.524474 | 1 SHOX2          | K09331 |
| ENSG00000103544 | 0.593997  | 0.622115  | 0.524474 | 1 C16orf62       | -      |
| ENSG00000113555 | 0.593997  | 0.622115  | 0.524474 | 1 PCDH12         | K16499 |
| ENSG00000167771 | 0.593997  | 0.622115  | 0.524474 | 1 RCOR2          | -      |
| ENSG00000237883 | 0.593997  | 0.622115  | 0.524474 | 1 DGUOK-AS1      | -      |
| ENSG00000272097 | 0.593997  | 0.622115  | 0.524474 | 1 RP11-421M1.8   | -      |
| ENSG00000114529 | -0.444131 | 3.858364  | 0.524546 | 1 C3orf52        | -      |
| ENSG00000197774 | -0.438859 | 3.855277  | 0.524546 | 1 EME2           | K10883 |
| ENSG00000113318 | -0.438039 | 4.200738  | 0.524868 | 1 MSH3           | K08736 |
| ENSG00000122417 | -0.421595 | 5.66834   | 0.524871 | 1 ODF2L          | -      |
| ENSG00000101057 | 0.416963  | 8.419088  | 0.524908 | 1 MYBL2          | K09421 |
| ENSG00000227500 | 0.431672  | 4.392392  | 0.525016 | 1 SCAMP4         | -      |

|                 |           |          |          |                 |        |
|-----------------|-----------|----------|----------|-----------------|--------|
| ENSG00000125247 | -0.436428 | 4.421116 | 0.52503  | 1 TMTC4         | -      |
| ENSG00000164294 | -0.418016 | 7.234149 | 0.525188 | 1 GPX8          | K00432 |
| ENSG00000185624 | 0.415639  | 9.985365 | 0.525641 | 1 P4HB          | K09580 |
| ENSG00000121966 | 0.418618  | 6.294647 | 0.525708 | 1 CXCR4         | K04189 |
| ENSG00000170027 | 0.415728  | 8.56266  | 0.52605  | 1 YWHAG         | K16198 |
| ENSG00000196366 | 0.599193  | 0.877561 | 0.526087 | 1 C9orf163      | -      |
| ENSG00000212123 | 0.599193  | 0.877561 | 0.526087 | 1 PRR22         | -      |
| ENSG00000251151 | 0.599193  | 0.877561 | 0.526087 | 1 HOXC-AS3      | -      |
| ENSG00000253931 | 0.599193  | 0.877561 | 0.526087 | 1 RP11-909N17.2 | -      |
| ENSG00000271533 | 0.599193  | 0.877561 | 0.526087 | 1 RP3-368A4.6   | -      |
| ENSG00000272716 | 0.599193  | 0.877561 | 0.526087 | 1 RP11-563N4.1  | -      |
| ENSG00000231889 | -0.585582 | 0.938716 | 0.526087 | 1 TRAF3IP2-AS1  | -      |
| ENSG00000245248 | -0.585582 | 0.938716 | 0.526087 | 1 USP2-AS1      | -      |
| ENSG00000248932 | -0.585582 | 0.938716 | 0.526087 | 1 RP11-319G6.1  | -      |
| ENSG00000183258 | 0.418464  | 6.36617  | 0.526154 | 1 DDX41         | K13116 |
| ENSG00000152242 | 0.423393  | 4.926539 | 0.526487 | 1 C18orf25      | -      |
| ENSG00000153094 | 0.423905  | 4.869065 | 0.526508 | 1 BCL2L11       | K16341 |
| ENSG00000183605 | -0.4252   | 4.798341 | 0.526536 | 1 SFXN4         | -      |
| ENSG00000133104 | -0.417691 | 6.652269 | 0.5266   | 1 SPG20         | K19366 |
| ENSG00000108578 | -0.418793 | 6.277733 | 0.526629 | 1 BLMH          | K01372 |
| ENSG00000164543 | 0.416424  | 7.151336 | 0.526674 | 1 STK17A        | K08804 |
| ENSG00000101888 | -0.431897 | 3.894011 | 0.526969 | 1 NXT2          | K14285 |
| ENSG00000163794 | 0.602847  | 1.095204 | 0.526983 | 1 UCN           | -      |
| ENSG00000102796 | 0.550699  | 1.118865 | 0.526983 | 1 DHRS12        | K11168 |
| ENSG00000128510 | -0.417497 | 6.35517  | 0.527032 | 1 CPA4          | K08637 |
| ENSG00000167232 | -0.436881 | 3.530773 | 0.527198 | 1 ZNF91         | K09228 |
| ENSG00000124574 | 0.435483  | 3.516255 | 0.527198 | 1 ABCC10        | K05674 |
| ENSG00000181409 | 0.447899  | 3.22827  | 0.527401 | 1 AATK          | K17480 |
| ENSG00000253710 | 0.453391  | 3.175703 | 0.527434 | 1 ALG11         | K03844 |
| ENSG00000265298 | -0.575213 | 1.340041 | 0.527497 | 1 RP13-104F24.3 | K12854 |
| ENSG00000171951 | -0.543621 | 1.320614 | 0.527497 | 1 SCG2          | -      |
| ENSG00000188747 | -0.445984 | 3.04392  | 0.527543 | 1 NOXA1         | -      |
| ENSG00000241058 | -0.447956 | 2.939221 | 0.527622 | 1 NSUN6         | -      |
| ENSG00000111196 | -0.418536 | 5.616642 | 0.527752 | 1 MAGOHB        | K12877 |
| ENSG00000189164 | -0.54391  | 1.487781 | 0.527794 | 1 ZNF527        | K09228 |
| ENSG00000073060 | 0.413899  | 8.677318 | 0.527807 | 1 SCARB1        | K13885 |
| ENSG00000267751 | -0.483849 | 2.621494 | 0.527843 | 1 AC009005.2    | -      |
| ENSG00000151726 | 0.453132  | 2.5987   | 0.527843 | 1 ACSL1         | K01897 |
| ENSG00000004534 | -0.418694 | 5.984731 | 0.527916 | 1 RBM6          | K13094 |
| ENSG00000169045 | -0.413782 | 8.803985 | 0.527931 | 1 HNRNPH1       | K12898 |
| ENSG00000245149 | -0.47678  | 2.470964 | 0.527935 | 1 RNF139-AS1    | -      |
| ENSG00000118276 | -0.544139 | 1.637368 | 0.527962 | 1 B4GALT6       | K07553 |
| ENSG00000261455 | 0.486981  | 1.610015 | 0.527962 | 1 LINC01003     | -      |
| ENSG00000104324 | -0.467901 | 2.302707 | 0.52802  | 1 CPQ           | K01302 |
| ENSG00000163877 | 0.42645   | 4.613114 | 0.528057 | 1 SNIP1         | K13108 |
| ENSG00000183444 | -0.474519 | 2.122826 | 0.528083 | 1 OR7E38P       | K04257 |
| ENSG00000198951 | 0.427249  | 4.541345 | 0.528162 | 1 NAGA          | K01204 |
| ENSG00000033627 | 0.419023  | 5.145923 | 0.528431 | 1 ATP6V0A1      | K02154 |
| ENSG00000023608 | -0.432728 | 4.328238 | 0.528512 | 1 SNAPC1        | K15208 |
| ENSG00000197442 | 0.4263    | 4.231046 | 0.528668 | 1 MAP3K5        | K04426 |
| ENSG00000105656 | 0.433151  | 4.134251 | 0.528844 | 1 ELL           | K15183 |
| ENSG00000168710 | 0.413047  | 8.195547 | 0.528944 | 1 AHCYL1        | K01251 |
| ENSG00000164896 | -0.415218 | 6.695575 | 0.528953 | 1 FASTK         | K08290 |
| ENSG00000170291 | -0.418908 | 5.604097 | 0.529244 | 1 ELP5          | K17617 |
| ENSG00000156875 | -0.414251 | 6.951119 | 0.529396 | 1 HIAT1         | -      |
| ENSG00000106355 | -0.414231 | 6.451355 | 0.529427 | 1 LSM5          | K12624 |
| ENSG00000169851 | -0.414905 | 6.563433 | 0.529569 | 1 PCDH7         | K16498 |
| ENSG00000184992 | -0.418351 | 5.742166 | 0.529615 | 1 BRI3BP        | K17985 |

|                 |           |          |          |             |        |
|-----------------|-----------|----------|----------|-------------|--------|
| ENSG00000138185 | -0.42444  | 4.553726 | 0.529676 | 1 ENTPD1    | K01510 |
| ENSG00000170322 | 0.420295  | 4.938059 | 0.52997  | 1 NFRKB     | K11671 |
| ENSG00000133773 | -0.417151 | 5.831741 | 0.530028 | 1 CCDC59    | -      |
| ENSG00000171992 | 0.415595  | 6.253764 | 0.5304   | 1 SYNPO     | -      |
| ENSG00000137216 | 0.414703  | 6.031992 | 0.530592 | 1 TMEM63B   | -      |
| ENSG00000144840 | -0.43389  | 4.198319 | 0.530684 | 1 RABL3     | K07933 |
| ENSG00000196678 | -0.447638 | 3.301299 | 0.530947 | 1 ERI2      | K18417 |
| ENSG00000165752 | 0.419712  | 4.983209 | 0.530975 | 1 STK32C    | K08793 |
| ENSG00000118985 | 0.411327  | 7.765706 | 0.531011 | 1 ELL2      | K15183 |
| ENSG00000143753 | 0.410923  | 8.152791 | 0.531091 | 1 DEGS1     | K04712 |
| ENSG00000124126 | 0.420861  | 4.550784 | 0.531182 | 1 PREX1     | K12365 |
| ENSG00000097007 | 0.41185   | 7.142324 | 0.531232 | 1 ABL1      | K06619 |
| ENSG00000116717 | -0.413239 | 6.139913 | 0.531285 | 1 GADD45A   | K04402 |
| ENSG00000172590 | -0.416748 | 5.173082 | 0.531377 | 1 MRPL52    | K17433 |
| ENSG00000166106 | -0.437427 | 3.161107 | 0.531402 | 1 ADAMTS15  | K08629 |
| ENSG00000127511 | 0.412966  | 6.157939 | 0.531716 | 1 SIN3B     | K17985 |
| ENSG00000100577 | -0.435905 | 3.882225 | 0.5318   | 1 GSTZ1     | K01800 |
| ENSG00000241973 | 0.415339  | 5.458246 | 0.532029 | 1 PI4KA     | K00888 |
| ENSG00000188343 | 0.431567  | 3.810369 | 0.532039 | 1 FAM92A1   | -      |
| ENSG00000182054 | 0.413821  | 5.910879 | 0.53219  | 1 IDH2      | K00031 |
| ENSG00000115233 | -0.411519 | 6.773276 | 0.532462 | 1 PSMD14    | K03030 |
| ENSG00000135999 | -0.432086 | 3.698694 | 0.53258  | 1 EPC2      | K11322 |
| ENSG00000010165 | -0.414086 | 5.958934 | 0.53258  | 1 METTL13   | K01528 |
| ENSG00000164405 | -0.410197 | 7.471692 | 0.532623 | 1 UQCRQ     | K00418 |
| ENSG00000077809 | 0.428895  | 3.648268 | 0.532731 | 1 GTF2I     | K03121 |
| ENSG00000114686 | -0.410368 | 7.218692 | 0.532809 | 1 MRPL3     | K02906 |
| ENSG00000164970 | 0.453207  | 2.74315  | 0.532868 | 1 FAM219A   | -      |
| ENSG00000133657 | -0.410847 | 6.875236 | 0.532925 | 1 ATP13A3   | K14951 |
| ENSG00000133119 | -0.411191 | 6.381678 | 0.533057 | 1 RFC3      | K10756 |
| ENSG00000007047 | 0.419804  | 4.766282 | 0.533092 | 1 MARK4     | K08798 |
| ENSG00000149503 | 0.411026  | 6.257777 | 0.533209 | 1 INCENP    | K11515 |
| ENSG00000184979 | -0.460769 | 2.642046 | 0.533441 | 1 USP18     | K11846 |
| ENSG00000107290 | -0.413117 | 6.116129 | 0.533454 | 1 SETX      | K10706 |
| ENSG00000179886 | -0.415364 | 4.914638 | 0.533628 | 1 TIGD5     | -      |
| ENSG00000183397 | 0.453103  | 2.547163 | 0.533764 | 1 C19orf71  | -      |
| ENSG00000180346 | -0.431467 | 3.948922 | 0.533861 | 1 TIGD2     | -      |
| ENSG00000198792 | 0.409312  | 7.007092 | 0.53397  | 1 TMEM184B  | -      |
| ENSG00000187609 | -0.433001 | 3.39567  | 0.534015 | 1 EXD3      | -      |
| ENSG00000147687 | -0.41791  | 5.23018  | 0.534042 | 1 TATDN1    | K03424 |
| ENSG00000138363 | -0.409003 | 7.284474 | 0.534072 | 1 ATIC      | K00602 |
| ENSG00000177868 | -0.451257 | 2.493699 | 0.534116 | 1 CCDC23    | -      |
| ENSG00000164087 | -0.415537 | 4.777703 | 0.534379 | 1 POC1A     | K16482 |
| ENSG00000122507 | -0.46028  | 2.42205  | 0.5345   | 1 BBS9      | K19398 |
| ENSG00000110395 | 0.415677  | 5.285393 | 0.534635 | 1 CBL       | K04707 |
| ENSG00000223773 | 0.427668  | 4.154174 | 0.534783 | 1 CD99P1    | -      |
| ENSG00000003436 | 0.408288  | 7.109274 | 0.534835 | 1 TFPI      | K03909 |
| ENSG00000188158 | 0.413156  | 5.241938 | 0.534909 | 1 NHS       | -      |
| ENSG00000179832 | 0.422386  | 3.723413 | 0.535071 | 1 MROH1     | -      |
| ENSG00000100216 | -0.409344 | 6.568995 | 0.535087 | 1 TOMM22    | K17769 |
| ENSG00000186854 | 0.408207  | 6.905927 | 0.535242 | 1 TRABD2A   | -      |
| ENSG00000084092 | 0.411136  | 5.585393 | 0.535265 | 1 NOA1      | K17985 |
| ENSG00000239569 | 0.486755  | 2.209948 | 0.535383 | 1 KMT2E-AS1 | -      |
| ENSG00000128833 | -0.41041  | 5.670068 | 0.535464 | 1 MYO5C     | K10357 |
| ENSG00000180329 | -0.411104 | 5.662309 | 0.53552  | 1 CCDC43    | -      |
| ENSG00000006327 | -0.408415 | 6.711559 | 0.535688 | 1 TNFRSF12A | K05149 |
| ENSG00000196205 | 0.405482  | 10.43094 | 0.535699 | 1 EEF1A1P5  | K03231 |
| ENSG00000100302 | -0.438806 | 3.636746 | 0.53571  | 1 RASD2     | K07844 |
| ENSG00000234912 | 0.428461  | 3.623552 | 0.53571  | 1 LINC00338 | -      |

|                 |           |          |          |                 |        |
|-----------------|-----------|----------|----------|-----------------|--------|
| ENSG00000263142 | 0.477     | 2.112614 | 0.535895 | 1 LRRC37A17P    | K10128 |
| ENSG00000162004 | -0.447831 | 3.070304 | 0.535896 | 1 CCDC78        | -      |
| ENSG00000197943 | -0.447831 | 3.070304 | 0.535896 | 1 PLCG2         | K05859 |
| ENSG00000073150 | 0.434755  | 3.059916 | 0.535896 | 1 PANX2         | K03443 |
| ENSG00000165689 | -0.408404 | 6.621958 | 0.5359   | 1 SDCCAG3       | -      |
| ENSG00000142875 | -0.415796 | 5.350938 | 0.536047 | 1 PRKACB        | K04345 |
| ENSG00000090266 | -0.408788 | 6.365318 | 0.536203 | 1 NDUFB2        | K03958 |
| ENSG00000224831 | -0.453578 | 3.022671 | 0.536238 | 1 RP11-651P23.4 | -      |
| ENSG00000170854 | -0.415196 | 4.683728 | 0.536337 | 1 MINA          | -      |
| ENSG00000204611 | 0.423067  | 4.207492 | 0.536388 | 1 ZNF616        | K09228 |
| ENSG00000161243 | -0.488203 | 2.029473 | 0.536462 | 1 FBXO27        | K10102 |
| ENSG00000180385 | 0.46575   | 2.008348 | 0.536462 | 1 EMC3-AS1      | K04613 |
| ENSG00000160049 | -0.409379 | 6.195332 | 0.536506 | 1 DFFA          | K02310 |
| ENSG00000171843 | 0.407649  | 6.192581 | 0.536506 | 1 MLLT3         | K15187 |
| ENSG00000198799 | 0.414148  | 4.186014 | 0.536557 | 1 LRIG2         | -      |
| ENSG00000086062 | 0.404983  | 8.761382 | 0.536672 | 1 B4GALT1       | K07966 |
| ENSG00000075151 | 0.409882  | 5.948356 | 0.536698 | 1 EIF4G3        | K03260 |
| ENSG00000205670 | -0.419464 | 4.421004 | 0.536722 | 1 SMIM11        | K12581 |
| ENSG00000269343 | 0.418165  | 3.859768 | 0.536735 | 1 ZNF587B       | K09228 |
| ENSG00000140474 | -0.410483 | 5.104741 | 0.536873 | 1 ULK3          | K08269 |
| ENSG00000168944 | -0.419433 | 4.381635 | 0.53703  | 1 CEP120        | K16459 |
| ENSG00000196636 | -0.435342 | 3.809108 | 0.537187 | 1 ACN9          | -      |
| ENSG00000175895 | -0.414117 | 5.051619 | 0.537267 | 1 PLEKHF2       | -      |
| ENSG00000101745 | 0.420349  | 4.086053 | 0.537291 | 1 ANKRD12       | -      |
| ENSG00000139263 | -0.416066 | 4.724048 | 0.537433 | 1 LRIG3         | -      |
| ENSG00000157933 | 0.410518  | 5.372819 | 0.537596 | 1 SKI           | -      |
| ENSG00000205250 | -0.409396 | 5.982673 | 0.537608 | 1 E2F4          | K04682 |
| ENSG00000148400 | 0.413384  | 5.250042 | 0.537684 | 1 NOTCH1        | K02599 |
| ENSG00000167264 | -0.417111 | 4.852355 | 0.537695 | 1 DUS2          | K05543 |
| ENSG00000152457 | -0.421455 | 4.047462 | 0.537697 | 1 DCLRE1C       | K10887 |
| ENSG00000223482 | -0.422345 | 4.247466 | 0.538069 | 1 NUTM2A-AS1    | -      |
| ENSG00000165699 | -0.412912 | 4.80614  | 0.538072 | 1 TSC1          | K07206 |
| ENSG00000162704 | -0.403772 | 8.405599 | 0.53817  | 1 ARPC5         | K05754 |
| ENSG00000148841 | 0.407715  | 6.104651 | 0.538223 | 1 ITPRIP        | -      |
| ENSG00000169682 | -0.4435   | 2.730187 | 0.538378 | 1 SPNS1         | -      |
| ENSG00000189077 | 0.437271  | 2.703811 | 0.538378 | 1 TMEM120A      | -      |
| ENSG00000174547 | -0.405329 | 6.856115 | 0.538475 | 1 MRPL11        | K02867 |
| ENSG00000082516 | -0.407879 | 6.014173 | 0.538481 | 1 GEMIN5        | K13133 |
| ENSG00000107984 | 0.409776  | 5.263834 | 0.538504 | 1 DKK1          | K02165 |
| ENSG00000024526 | -0.404863 | 7.053895 | 0.538578 | 1 DEPDC1        | -      |
| ENSG00000267374 | -0.520057 | 1.691873 | 0.538599 | 1 LINC00669     | -      |
| ENSG00000182359 | -0.495466 | 1.676915 | 0.538599 | 1 KBTBD3        | K06133 |
| ENSG00000260966 | -0.495466 | 1.676915 | 0.538599 | 1 RP11-690D19.3 | -      |
| ENSG00000179241 | -0.416349 | 4.566673 | 0.538736 | 1 LDLRAD3       | -      |
| ENSG00000187676 | -0.424929 | 3.61167  | 0.538801 | 1 B3GALTL       | K13675 |
| ENSG00000171634 | 0.411084  | 4.356537 | 0.538891 | 1 BPTF          | K11728 |
| ENSG00000214530 | 0.431639  | 3.557916 | 0.539116 | 1 STARD10       | -      |
| ENSG00000131966 | -0.408022 | 5.468308 | 0.539348 | 1 ACTR10        | K16576 |
| ENSG00000091136 | -0.403006 | 7.89634  | 0.539348 | 1 LAMB1         | K05636 |
| ENSG00000101849 | 0.404734  | 6.550861 | 0.539409 | 1 TBL1X         | K04508 |
| ENSG00000226314 | -0.517148 | 1.548099 | 0.539497 | 1 ZNF192P1      | K09229 |
| ENSG00000261609 | -0.425699 | 3.818331 | 0.53966  | 1 GAN           | K10453 |
| ENSG00000142192 | 0.401663  | 9.198146 | 0.539827 | 1 APP           | K04520 |
| ENSG00000174032 | -0.415319 | 4.254309 | 0.5399   | 1 SLC25A30      | K15106 |
| ENSG00000069275 | -0.402239 | 8.101517 | 0.539937 | 1 NUCKS1        | -      |
| ENSG00000151376 | -0.417276 | 4.233525 | 0.540121 | 1 ME3           | K00029 |
| ENSG00000180229 | 0.43928   | 3.445422 | 0.540161 | 1 HERC2P3       | K10595 |
| ENSG00000186532 | 0.413934  | 4.824831 | 0.540409 | 1 SMYD4         | K16896 |

|                 |           |           |          |                    |        |
|-----------------|-----------|-----------|----------|--------------------|--------|
| ENSG00000228110 | 0.515832  | 1.325565  | 0.54051  | 1 ST13P19          | K09560 |
| ENSG00000127311 | -0.513508 | 1.388154  | 0.54051  | 1 HELB             | K15254 |
| ENSG00000166473 | -0.513508 | 1.388154  | 0.54051  | 1 PKD1L2           | K04988 |
| ENSG00000120437 | -0.403448 | 6.778101  | 0.540518 | 1 ACAT2            | K00626 |
| ENSG00000180921 | -0.434632 | 3.41637   | 0.540548 | 1 FAM83H           | K19603 |
| ENSG00000213903 | -0.434632 | 3.41637   | 0.540548 | 1 LTB4R            | K04296 |
| ENSG00000184162 | -0.41222  | 4.682009  | 0.540569 | 1 NR2C2AP          | K08062 |
| ENSG00000225470 | -0.41222  | 4.682009  | 0.540569 | 1 JPX              | -      |
| ENSG00000125459 | -0.423137 | 3.725313  | 0.540577 | 1 MSTO1            | -      |
| ENSG00000151116 | -0.414799 | 4.368943  | 0.54058  | 1 UEVLD            | -      |
| ENSG00000124766 | -0.406808 | 5.829447  | 0.540827 | 1 SOX4             | K09268 |
| ENSG00000163412 | 0.443262  | 2.41416   | 0.540855 | 1 EIF4E3           | K04301 |
| ENSG00000109971 | -0.400364 | 10.49407  | 0.540856 | 1 HSPA8            | K03283 |
| ENSG00000179134 | 0.403757  | 6.490079  | 0.540985 | 1 SAMD4B           | -      |
| ENSG00000213281 | -0.401738 | 7.468029  | 0.541099 | 1 NRAS             | K07828 |
| ENSG00000196793 | -0.435455 | 3.336207  | 0.541387 | 1 ZNF239           | K09228 |
| ENSG00000120694 | -0.400944 | 7.878604  | 0.54144  | 1 HSPH1            | K09485 |
| ENSG00000197989 | -0.414467 | 4.850829  | 0.541469 | 1 SNHG12           | -      |
| ENSG00000120820 | -0.408136 | 5.326048  | 0.54163  | 1 GLT8D2           | K14966 |
| ENSG00000265194 | -0.543445 | 1.229035  | 0.54165  | 1 RP11-70L8.4      | -      |
| ENSG00000267278 | -0.50882  | 1.207906  | 0.54165  | 1 MAP3K14-AS1      | -      |
| ENSG00000099974 | -0.43197  | 3.292076  | 0.541844 | 1 DDTL             | K10028 |
| ENSG00000008282 | -0.401946 | 6.859525  | 0.541862 | 1 SYPL1            | K04264 |
| ENSG00000137497 | 0.400991  | 6.379374  | 0.542185 | 1 NUMA1            | K16808 |
| ENSG00000155621 | 0.410673  | 4.645148  | 0.542304 | 1 C9orf85          | K17985 |
| ENSG00000122678 | 0.422412  | 3.535528  | 0.542411 | 1 POLM             | K03513 |
| ENSG00000007520 | -0.401219 | 6.925114  | 0.542468 | 1 TSR3             | K09140 |
| ENSG00000139579 | -0.402822 | 6.008074  | 0.54249  | 1 NABP2            | K09654 |
| ENSG00000187535 | 0.411014  | 4.847908  | 0.542674 | 1 IFT140           | K19672 |
| ENSG00000143443 | -0.543007 | 1.026012  | 0.542911 | 1 C1orf56          | -      |
| ENSG00000179841 | -0.543007 | 1.026012  | 0.542911 | 1 AKAP5            | K16522 |
| ENSG00000176971 | -0.502557 | 1.001401  | 0.542911 | 1 FIBIN            | -      |
| ENSG00000176490 | 0.405226  | 5.434062  | 0.542957 | 1 DIRAS1           | K07840 |
| ENSG00000067798 | -1.056316 | -0.347833 | 0.542974 | 1 NAV3             | -      |
| ENSG00000106302 | -1.056316 | -0.347833 | 0.542974 | 1 HYAL4            | K01197 |
| ENSG00000143257 | -1.056316 | -0.347833 | 0.542974 | 1 NR1I3            | K08541 |
| ENSG00000185338 | -1.056316 | -0.347833 | 0.542974 | 1 SOCS1            | K04694 |
| ENSG00000185774 | -1.056316 | -0.347833 | 0.542974 | 1 KCNIP4           | -      |
| ENSG00000230267 | -1.056316 | -0.347833 | 0.542974 | 1 HERC2P4          | K10595 |
| ENSG00000230337 | -1.056316 | -0.347833 | 0.542974 | 1 RP4-635E18.6     | -      |
| ENSG00000231466 | -1.056316 | -0.347833 | 0.542974 | 1 CTA-246H3.11     | -      |
| ENSG00000235609 | -1.056316 | -0.347833 | 0.542974 | 1 AF127936.7       | -      |
| ENSG00000241418 | -1.056316 | -0.347833 | 0.542974 | 1 RP11-512H23.2    | -      |
| ENSG00000248238 | -1.056316 | -0.347833 | 0.542974 | 1 RP11-3J1.1       | -      |
| ENSG00000256006 | -1.056316 | -0.347833 | 0.542974 | 1 AC084117.3       | -      |
| ENSG00000261423 | -1.056316 | -0.347833 | 0.542974 | 1 RP11-1007O24.3   | -      |
| ENSG00000269988 | -1.056316 | -0.347833 | 0.542974 | 1 RP11-395P17.11   | -      |
| ENSG00000270018 | -1.056316 | -0.347833 | 0.542974 | 1 RP3-462E2.5      | -      |
| ENSG00000271127 | -1.056316 | -0.347833 | 0.542974 | 1 LL22NC03-N64E9.1 | -      |
| ENSG00000273237 | -1.056316 | -0.347833 | 0.542974 | 1 CTB-119C2.1      | -      |
| ENSG00000047457 | -0.942373 | -0.416729 | 0.542974 | 1 CP               | K13624 |
| ENSG00000088340 | -0.942373 | -0.416729 | 0.542974 | 1 FER1L4           | K11447 |
| ENSG00000145431 | -0.942373 | -0.416729 | 0.542974 | 1 PDGFC            | K05450 |
| ENSG00000165029 | -0.942373 | -0.416729 | 0.542974 | 1 ABCA1            | K05641 |
| ENSG00000169245 | -0.942373 | -0.416729 | 0.542974 | 1 CXCL10           | K12671 |
| ENSG00000170417 | -0.942373 | -0.416729 | 0.542974 | 1 TMEM182          | -      |
| ENSG00000172738 | -0.942373 | -0.416729 | 0.542974 | 1 TMEM217          | -      |
| ENSG00000184451 | -0.942373 | -0.416729 | 0.542974 | 1 CCR10            | K04185 |

|                 |           |           |          |                  |        |
|-----------------|-----------|-----------|----------|------------------|--------|
| ENSG00000213412 | -0.942373 | -0.416729 | 0.542974 | 1 HNRNPA1P33     | K12741 |
| ENSG00000232346 | -0.942373 | -0.416729 | 0.542974 | 1 SC22CB-1E7.1   | K02962 |
| ENSG00000232637 | -0.942373 | -0.416729 | 0.542974 | 1 WI2-3658N16.1  | -      |
| ENSG00000244578 | -0.942373 | -0.416729 | 0.542974 | 1 RP11-548O1.3   | -      |
| ENSG00000269176 | -0.942373 | -0.416729 | 0.542974 | 1 RP11-727F15.12 | -      |
| ENSG00000272402 | -0.942373 | -0.416729 | 0.542974 | 1 RP1-30M3.6     | -      |
| ENSG00000273443 | -0.942373 | -0.416729 | 0.542974 | 1 RP11-54O7.18   | -      |
| ENSG00000254986 | -0.405603 | 5.355215  | 0.543108 | 1 DPP3           | K01277 |
| ENSG00000092010 | -0.399931 | 7.285919  | 0.543167 | 1 PSME1          | K06696 |
| ENSG00000176473 | 0.41487   | 4.106648  | 0.543338 | 1 WDR25          | -      |
| ENSG00000130119 | -0.428771 | 3.156012  | 0.543393 | 1 GNL3L          | K14538 |
| ENSG00000108511 | 0.424028  | 3.136987  | 0.543393 | 1 HOXB6          | K09306 |
| ENSG00000188315 | 0.424028  | 3.136987  | 0.543393 | 1 C3orf62        | K02927 |
| ENSG00000167397 | 0.401708  | 6.10272   | 0.543503 | 1 VKORC1         | K05357 |
| ENSG00000147592 | -0.40821  | 4.889726  | 0.54351  | 1 LACTB2         | -      |
| ENSG00000119616 | -0.406556 | 5.309583  | 0.54363  | 1 FCF1           | K14566 |
| ENSG00000166548 | -0.414267 | 4.242782  | 0.543797 | 1 TK2            | K00857 |
| ENSG00000118508 | -0.401859 | 5.422087  | 0.54401  | 1 RAB32          | K07918 |
| ENSG00000023287 | 0.398523  | 7.500403  | 0.544129 | 1 RB1CC1         | K17589 |
| ENSG00000198520 | 0.619606  | 0.701639  | 0.544247 | 1 C1orf228       | -      |
| ENSG00000239332 | 0.619606  | 0.701639  | 0.544247 | 1 LINC01119      | -      |
| ENSG00000100207 | 0.549789  | 0.733258  | 0.544247 | 1 TCF20          | K03950 |
| ENSG00000233006 | 0.478223  | 2.040013  | 0.544556 | 1 AC034220.3     | -      |
| ENSG00000100526 | 0.404668  | 5.061638  | 0.544732 | 1 CDKN3          | K14167 |
| ENSG00000159199 | -0.401015 | 6.417485  | 0.544765 | 1 ATP5G1         | K02128 |
| ENSG00000100836 | -0.402424 | 5.771328  | 0.544779 | 1 PABPN1         | K14396 |
| ENSG00000187957 | 0.410687  | 4.775973  | 0.544852 | 1 DNER           | -      |
| ENSG00000181873 | 0.423847  | 3.791567  | 0.544928 | 1 IBA57          | K15696 |
| ENSG00000106080 | -0.40656  | 5.041002  | 0.545076 | 1 FKBP14         | K09577 |
| ENSG00000079841 | 0.39814   | 7.056073  | 0.545105 | 1 RIMS1          | K15291 |
| ENSG00000213398 | 0.427175  | 2.585013  | 0.545115 | 1 LCAT           | K00650 |
| ENSG00000143924 | -0.399864 | 6.414412  | 0.54524  | 1 EML4           | K15420 |
| ENSG00000135902 | 0.44675   | 2.978475  | 0.545277 | 1 CHRND          | K04816 |
| ENSG00000062038 | 0.618558  | 0.410226  | 0.545468 | 1 CDH3           | -      |
| ENSG00000261474 | 0.618558  | 0.410226  | 0.545468 | 1 RP11-452L6.1   | -      |
| ENSG00000164880 | 0.396831  | 7.603622  | 0.545724 | 1 INTS1          | K13138 |
| ENSG00000260121 | 0.466427  | 1.930224  | 0.545785 | 1 RP5-1142A6.9   | -      |
| ENSG00000113966 | -0.465716 | 1.962272  | 0.545785 | 1 ARL6           | K07951 |
| ENSG00000258655 | -0.465716 | 1.962272  | 0.545785 | 1 ARHGAP5-AS1    | -      |
| ENSG00000116285 | 0.398346  | 5.883579  | 0.545785 | 1 ERFFI1         | -      |
| ENSG00000102805 | -0.411087 | 4.366796  | 0.545863 | 1 CLN5           | K12390 |
| ENSG00000104714 | -0.411087 | 4.366796  | 0.545863 | 1 ERICH1         | -      |
| ENSG00000139890 | 0.616819  | 0.046836  | 0.545915 | 1 REM2           | K07848 |
| ENSG00000213700 | 0.616819  | 0.046836  | 0.545915 | 1 RPL17P50       | K02880 |
| ENSG00000229692 | 0.616819  | 0.046836  | 0.545915 | 1 SOS1-IT1       | -      |
| ENSG00000259426 | 0.616819  | 0.046836  | 0.545915 | 1 RP11-253M7.1   | -      |
| ENSG00000105875 | 0.439634  | 2.921914  | 0.545998 | 1 WDR91          | K15696 |
| ENSG00000150967 | 0.439634  | 2.921914  | 0.545998 | 1 ABCB9          | K05656 |
| ENSG00000065615 | -0.411004 | 4.207635  | 0.546252 | 1 CYB5R4         | K00326 |
| ENSG00000141644 | 0.398341  | 5.7906    | 0.546456 | 1 MBD1           | K11589 |
| ENSG00000182585 | -0.410648 | 4.435184  | 0.546632 | 1 EPGN           | -      |
| ENSG00000171566 | -0.398622 | 5.943395  | 0.546797 | 1 PLRG1          | K12862 |
| ENSG00000134363 | -0.462728 | 2.462547  | 0.547051 | 1 FST            | K04661 |
| ENSG00000197362 | -0.448538 | 2.454076  | 0.547051 | 1 ZNF786         | K09228 |
| ENSG00000213186 | -0.480506 | 1.857455  | 0.547186 | 1 TRIM59         | K12028 |
| ENSG00000269044 | -0.480506 | 1.857455  | 0.547186 | 1 CTC-429P9.3    | -      |
| ENSG00000229619 | -0.458536 | 1.844218  | 0.547186 | 1 MBNL1-AS1      | -      |
| ENSG00000270804 | -0.458536 | 1.844218  | 0.547186 | 1 CTD-2583A14.11 | K06688 |



|                 |           |          |          |                 |              |
|-----------------|-----------|----------|----------|-----------------|--------------|
| ENSG00000115183 | 0.398127  | 5.785033 | 0.547197 | 1 TANC1         | -            |
| ENSG00000168765 | -0.403041 | 4.886753 | 0.547218 | 1 GSTM4         | K00799       |
| ENSG00000172500 | -0.397041 | 6.559786 | 0.547451 | 1 FIBP          | K16758       |
| ENSG00000166228 | -0.402398 | 5.358418 | 0.547489 | 1 PCBD1         | K01724       |
| ENSG00000146540 | -0.398754 | 6.086835 | 0.547492 | 1 C7orf50       | -            |
| ENSG00000223959 | -0.41862  | 3.607986 | 0.547694 | 1 AFG3L1P       | K08956       |
| ENSG00000129116 | 0.394953  | 7.342318 | 0.547926 | 1 PALLD         | -            |
| ENSG00000101191 | 0.398445  | 5.930438 | 0.548139 | 1 DIDO1         | -            |
| ENSG00000261488 | 0.463227  | 2.346148 | 0.548173 | 1 RP11-757F18.5 | -            |
| ENSG00000232973 | -0.457684 | 2.380372 | 0.548173 | 1 CYP1B1-AS1    | -            |
| ENSG00000160345 | 0.442811  | 2.355501 | 0.548173 | 1 C9orf116      | -            |
| ENSG00000169231 | -0.415329 | 3.571547 | 0.548235 | 1 THBS3         | K04659       |
| ENSG00000137094 | 0.418821  | 3.736698 | 0.548323 | 1 DNAJB5        | K09511       |
| ENSG00000107951 | -0.401348 | 5.416972 | 0.548347 | 1 MTPAP         | K18060       |
| ENSG00000072135 | -0.413893 | 3.911373 | 0.548388 | 1 PTPN18        | K18024       |
| ENSG00000267350 | 0.410028  | 4.044179 | 0.548438 | 1 RP1-178F10.3  | -            |
| ENSG00000132967 | -0.395716 | 6.654087 | 0.54857  | 1 HMGB1P5       | K10802       |
| ENSG00000137760 | -0.438622 | 3.064864 | 0.548684 | 1 ALKBH8        | K10770       |
| ENSG00000115484 | -0.392907 | 9.11014  | 0.548764 | 1 CCT4          | K09496       |
| ENSG00000101331 | -0.474127 | 1.730038 | 0.548796 | 1 CCM2L         | -            |
| ENSG00000121236 | -0.411464 | 3.718513 | 0.548828 | 1 TRIM6         | K11999       |
| ENSG00000197081 | 0.39426   | 7.017239 | 0.549088 | 1 IGF2R         | K06564       |
| ENSG00000130402 | 0.392581  | 8.929788 | 0.549111 | 1 ACTN4         | K05699       |
| ENSG00000089060 | -0.399274 | 5.05554  | 0.549258 | 1 SLC8B1        | K13754       |
| ENSG00000141569 | -0.397611 | 5.898602 | 0.549283 | 1 TRIM65        | K12031       |
| ENSG00000109674 | -0.404807 | 4.748639 | 0.549362 | 1 NEIL3         | K10569       |
| ENSG00000086717 | 0.45292   | 2.257815 | 0.549421 | 1 PPEF1         | K13807       |
| ENSG00000048342 | -0.451989 | 2.293181 | 0.549421 | 1 CC2D2A        | K19352       |
| ENSG00000135945 | -0.398414 | 5.109798 | 0.54944  | 1 REV1          | K03515       |
| ENSG00000166689 | 0.421034  | 3.256649 | 0.549454 | 1 PLEKHA7       | -            |
| ENSG00000124207 | -0.392439 | 8.593716 | 0.549494 | 1 CSEIL         | K18423       |
| ENSG00000080986 | -0.395251 | 6.466343 | 0.549511 | 1 NDC80         | K11547       |
| ENSG00000179431 | -0.44103  | 2.696659 | 0.549518 | 1 FJX1          | K16674       |
| ENSG00000168140 | 0.393719  | 7.06034  | 0.549569 | 1 VASN          | -            |
| ENSG00000156983 | 0.402394  | 4.950952 | 0.549733 | 1 BRPF1         | K11348       |
| ENSG00000153187 | -0.391806 | 9.359356 | 0.549788 | 1 HNRNPU        | K12888       |
| ENSG00000105085 | 0.405946  | 3.810701 | 0.549804 | 1 MED26         | K15169       |
| ENSG00000111961 | 0.415548  | 3.441809 | 0.550034 | 1 SASH1         | K02929       |
| ENSG00000115207 | 0.396211  | 6.018463 | 0.550202 | 1 GTF3C2        | K15200       |
| ENSG00000176407 | 0.393254  | 6.944547 | 0.550225 | 1 KCMF1         | -            |
| ENSG00000152669 | -0.409881 | 4.195725 | 0.550352 | 1 CCNO          | K10861       |
| ENSG00000196642 | 0.393769  | 6.548949 | 0.55046  | 1 RABL6         | -            |
| ENSG00000124782 | 0.396053  | 5.658533 | 0.550602 | 1 RREB1         | K12581       |
| ENSG00000145416 | 0.506517  | 1.55065  | 0.550667 | 1               | 1-Mar K10656 |
| ENSG00000160588 | -0.462549 | 2.210513 | 0.550817 | 1 MPZL3         | -            |
| ENSG00000230797 | -0.462549 | 2.210513 | 0.550817 | 1 YY2           | K09201       |
| ENSG00000269958 | -0.445509 | 2.200316 | 0.550817 | 1 RP11-73M18.8  | -            |
| ENSG00000259605 | 0.441197  | 2.163809 | 0.550817 | 1 AC074212.5    | -            |
| ENSG00000013275 | -0.394226 | 6.33423  | 0.550868 | 1 PSMC4         | K03063       |
| ENSG00000165650 | 0.39613   | 5.555805 | 0.550882 | 1 PDZD8         | -            |
| ENSG00000069482 | -0.399436 | 4.946177 | 0.551083 | 1 GAL           | K05244       |
| ENSG00000116649 | -0.395259 | 6.09391  | 0.551146 | 1 SRM           | K00797       |
| ENSG00000074696 | 0.391171  | 7.909596 | 0.551168 | 1 PTPLAD1       | K10703       |
| ENSG00000006025 | -0.435597 | 2.904177 | 0.551321 | 1 OSBPL7        | -            |
| ENSG00000113460 | -0.390749 | 8.386571 | 0.551341 | 1 BRIX1         | K14820       |
| ENSG00000102287 | -0.396821 | 5.438331 | 0.551383 | 1 GABRE         | K05185       |
| ENSG00000138081 | 0.398845  | 4.987426 | 0.551447 | 1 FBXO11        | K10297       |
| ENSG00000128578 | 0.398581  | 4.847952 | 0.551469 | 1 STRIP2        | -            |

|                 |           |          |          |                 |               |
|-----------------|-----------|----------|----------|-----------------|---------------|
| ENSG00000101367 | -0.391734 | 7.17431  | 0.551622 | 1 MAPRE1        | K10436        |
| ENSG00000186567 | 0.444062  | 2.52481  | 0.551786 | 1 CEACAM19      | K16825        |
| ENSG00000168517 | -0.429833 | 2.554084 | 0.551786 | 1 HEXIM2        | K15189        |
| ENSG00000167088 | -0.391891 | 6.948379 | 0.551846 | 1 SNRPD1        | K11087        |
| ENSG00000186522 | 0.391042  | 7.294963 | 0.551952 | 1               | 10-Sep K16940 |
| ENSG00000079432 | 0.393204  | 5.662874 | 0.551959 | 1 CIC           | K16941        |
| ENSG00000125733 | 0.390535  | 7.478605 | 0.552243 | 1 TRIP10        | K07196        |
| ENSG00000183260 | 0.431251  | 2.820275 | 0.552341 | 1 ABHD16B       | -             |
| ENSG00000162889 | -0.430813 | 2.844225 | 0.552341 | 1 MAPKAPK2      | K04443        |
| ENSG00000159873 | -0.394158 | 5.676942 | 0.552477 | 1 CCDC117       | -             |
| ENSG00000175768 | -0.39476  | 5.669219 | 0.552635 | 1 TOMM5         | K17773        |
| ENSG00000101417 | 0.534166  | 1.375544 | 0.552865 | 1 PXMP4         | K13350        |
| ENSG00000112379 | 0.534166  | 1.375544 | 0.552865 | 1 KIAA1244      | K17572        |
| ENSG00000171303 | 0.534166  | 1.375544 | 0.552865 | 1 KCNK3         | K04914        |
| ENSG00000053372 | -0.392837 | 6.13996  | 0.55294  | 1 MRTO4         | K14815        |
| ENSG00000117593 | -0.396734 | 5.48502  | 0.552999 | 1 DARS2         | K01876        |
| ENSG00000020256 | -0.401964 | 4.69216  | 0.55312  | 1 ZFP64         | -             |
| ENSG00000143933 | -0.388375 | 9.910759 | 0.553122 | 1 CALM2         | K02183        |
| ENSG00000243449 | -0.402325 | 4.829387 | 0.553218 | 1 C4orf48       | -             |
| ENSG00000174010 | 0.393423  | 5.848165 | 0.553261 | 1 KLHL15        | K10452        |
| ENSG00000130255 | -0.388702 | 8.526829 | 0.553333 | 1 RPL36         | K02920        |
| ENSG00000233184 | -0.436895 | 2.78833  | 0.553447 | 1 RP11-421L21.3 | -             |
| ENSG00000140199 | 0.406364  | 4.11942  | 0.553562 | 1 SLC12A6       | K14427        |
| ENSG00000106460 | -0.393408 | 5.960377 | 0.553603 | 1 TMEM106B      | -             |
| ENSG00000169239 | -0.427145 | 3.032806 | 0.55365  | 1 CA5B          | K01672        |
| ENSG00000135617 | 0.402357  | 4.321883 | 0.553651 | 1 PRADC1        | -             |
| ENSG00000197045 | -0.39181  | 5.795188 | 0.553688 | 1 GMFB          | -             |
| ENSG00000165704 | -0.390138 | 6.870463 | 0.553771 | 1 HPRT1         | K00760        |
| ENSG00000176973 | 0.400129  | 4.841832 | 0.55412  | 1 FAM89B        | -             |
| ENSG00000196268 | 0.479583  | 1.963591 | 0.554174 | 1 ZNF493        | K09228        |
| ENSG00000265666 | 0.479583  | 1.963591 | 0.554174 | 1 CTD-2267D19.2 | -             |
| ENSG00000105223 | 0.389639  | 6.769139 | 0.554204 | 1 PLD3          | K16860        |
| ENSG00000007038 | -0.389161 | 7.083312 | 0.554383 | 1 PRSS21        | K09625        |
| ENSG00000101040 | 0.392874  | 5.606279 | 0.554498 | 1 ZMYND8        | -             |
| ENSG00000203999 | -0.430887 | 2.404537 | 0.554538 | 1 RP11-290F20.1 | -             |
| ENSG00000009830 | -0.406677 | 4.076161 | 0.554542 | 1 POMT2         | K00728        |
| ENSG00000119965 | -0.409879 | 3.701755 | 0.554607 | 1 C10orf88      | -             |
| ENSG00000129646 | -0.431739 | 2.72322  | 0.554649 | 1 QRICH2        | -             |
| ENSG00000261452 | -0.419882 | 2.716215 | 0.554649 | 1 RP11-509E16.1 | -             |
| ENSG00000111877 | -0.415845 | 3.194562 | 0.554671 | 1 MCM9          | K10738        |
| ENSG00000105613 | 0.41344   | 3.176577 | 0.554671 | 1 MAST1         | K08789        |
| ENSG00000110514 | 0.389755  | 6.150481 | 0.554757 | 1 MADD          | -             |
| ENSG00000229644 | 0.393181  | 5.043129 | 0.554905 | 1 NAMPTL        | K03462        |
| ENSG00000138688 | -0.408366 | 4.261121 | 0.554954 | 1 KIAA1109      | -             |
| ENSG00000129680 | -0.397015 | 5.340158 | 0.554985 | 1 MAP7D3        | K16807        |
| ENSG00000142089 | 0.386688  | 8.759552 | 0.555187 | 1 IFITM3        | K06566        |
| ENSG00000205208 | -0.396494 | 4.917481 | 0.555255 | 1 C4orf46       | -             |
| ENSG00000152078 | -0.395202 | 5.233647 | 0.555273 | 1 TMEM56        | -             |
| ENSG00000108515 | 0.396004  | 4.415462 | 0.555276 | 1 ENO3          | K01689        |
| ENSG00000105197 | -0.388582 | 6.873085 | 0.555348 | 1 TIMM50        | K17496        |
| ENSG00000180011 | -0.394409 | 5.131186 | 0.555353 | 1 ZADH2         | K07119        |
| ENSG00000114850 | -0.386957 | 8.088311 | 0.555426 | 1 SSR3          | K13251        |
| ENSG00000246174 | 0.521847  | 1.198481 | 0.55548  | 1 KCTD21-AS1    | -             |
| ENSG00000260482 | 0.521847  | 1.198481 | 0.55548  | 1 CTD-2196E14.9 | -             |
| ENSG00000143315 | -0.414418 | 3.344468 | 0.555488 | 1 PIGM          | K05284        |
| ENSG00000171806 | -0.414418 | 3.344468 | 0.555488 | 1 METTL18       | -             |
| ENSG00000165417 | -0.393087 | 5.118636 | 0.555609 | 1 GTF2A1        | K03122        |
| ENSG00000249992 | -0.411301 | 3.145764 | 0.555623 | 1 TMEM158       | K01869        |

|                 |           |          |          |                  |        |
|-----------------|-----------|----------|----------|------------------|--------|
| ENSG00000133028 | -0.388901 | 6.429761 | 0.555565 | 1 SCO1           | K07152 |
| ENSG00000101782 | 0.389537  | 6.355929 | 0.555583 | 1 RIOK3          | K08872 |
| ENSG00000114021 | -0.388923 | 5.907395 | 0.555866 | 1 NIT2           | K13566 |
| ENSG00000115306 | 0.386776  | 7.667853 | 0.555867 | 1 SPTBN1         | K06115 |
| ENSG00000178950 | 0.388887  | 6.194336 | 0.555591 | 1 GAK            | K08855 |
| ENSG00000197565 | 0.444749  | 2.627615 | 0.555962 | 1 COL4A6         | K06237 |
| ENSG00000171443 | 0.407499  | 3.620307 | 0.555598 | 1 ZNF524         | -      |
| ENSG00000136444 | -0.393547 | 5.644053 | 0.556032 | 1 RSAD1          | -      |
| ENSG00000172731 | 0.442321  | 2.294372 | 0.556146 | 1 LRRC20         | K04240 |
| ENSG00000203995 | -0.403735 | 4.290473 | 0.556245 | 1 ZYG11A         | K10350 |
| ENSG00000143258 | -0.400572 | 4.531043 | 0.556307 | 1 USP21          | K11833 |
| ENSG00000162522 | 0.386665  | 7.120906 | 0.556649 | 1 KIAA1522       | -      |
| ENSG00000153015 | -0.391746 | 5.468306 | 0.556666 | 1 CWC27          | K12737 |
| ENSG00000161618 | -0.391068 | 5.300711 | 0.556747 | 1 ALDH16A1       | -      |
| ENSG00000144161 | -0.399019 | 4.166662 | 0.556893 | 1 ZC3H8          | -      |
| ENSG00000266753 | 0.438774  | 2.83857  | 0.556974 | 1 RP11-690G19.3  | -      |
| ENSG00000054523 | 0.392128  | 5.485962 | 0.557004 | 1 KIF1B          | K10392 |
| ENSG00000173757 | 0.386891  | 6.76024  | 0.557018 | 1 STAT5B         | K11224 |
| ENSG00000165118 | -0.39621  | 4.937622 | 0.557191 | 1 C9orf64        | K09228 |
| ENSG00000167548 | 0.386576  | 6.372454 | 0.55726  | 1 KMT2D          | K09187 |
| ENSG00000188015 | 0.415274  | 3.242929 | 0.557315 | 1 S100A3         | -      |
| ENSG00000135905 | -0.41404  | 3.260051 | 0.557315 | 1 DOCK10         | -      |
| ENSG00000084070 | 0.398013  | 4.132078 | 0.557419 | 1 SMAP2          | K12486 |
| ENSG00000115053 | -0.384086 | 10.06844 | 0.557467 | 1 NCL            | K11294 |
| ENSG00000109189 | -0.399839 | 3.818007 | 0.557595 | 1 USP46          | K11842 |
| ENSG00000144228 | -0.398085 | 4.033919 | 0.557663 | 1 SPOPL          | K10523 |
| ENSG00000245694 | -0.396764 | 4.221666 | 0.55771  | 1 CRNDE          | -      |
| ENSG00000185215 | 0.385531  | 6.8574   | 0.558229 | 1 TNFAIP2        | -      |
| ENSG00000268592 | 0.408362  | 3.195969 | 0.558315 | 1 RP11-244K5.8   | -      |
| ENSG00000188419 | -0.392758 | 4.710631 | 0.558351 | 1 CHM            | -      |
| ENSG00000110987 | -0.393273 | 4.579425 | 0.558384 | 1 BCL7A          | -      |
| ENSG00000164182 | -0.391427 | 5.386941 | 0.558442 | 1 NDUFAF2        | K18160 |
| ENSG00000169418 | 0.384633  | 7.323466 | 0.558446 | 1 NPR1           | K12323 |
| ENSG00000239789 | -0.394673 | 4.274651 | 0.55847  | 1 MRPS17         | K15120 |
| ENSG00000144959 | -0.389863 | 5.219609 | 0.5585   | 1 NCEH1          | K14349 |
| ENSG00000153896 | -0.582354 | 1.050156 | 0.558636 | 1 ZNF599         | K09228 |
| ENSG00000171557 | -0.582354 | 1.050156 | 0.558636 | 1 FGG            | K03905 |
| ENSG00000259485 | 0.505602  | 0.997201 | 0.558636 | 1 CTD-2147F2.1   | -      |
| ENSG00000260534 | 0.505602  | 0.997201 | 0.558636 | 1 RP11-1006G14.4 | -      |
| ENSG00000130347 | -0.39393  | 4.695508 | 0.558729 | 1 RTN4IP1        | -      |
| ENSG00000083857 | -0.389255 | 5.548135 | 0.558911 | 1 FAT1           | K16506 |
| ENSG00000049656 | -0.382866 | 9.187244 | 0.558971 | 1 CLPTM1L        | -      |
| ENSG00000101098 | 0.443677  | 2.47054  | 0.558985 | 1 RIMS4          | K15299 |
| ENSG00000143970 | -0.392127 | 4.678501 | 0.559116 | 1 ASXL2          | K11471 |
| ENSG00000072364 | 0.385022  | 6.626115 | 0.559189 | 1 AFF4           | K15185 |
| ENSG00000047849 | 0.383022  | 7.92482  | 0.559467 | 1 MAP4           | K10431 |
| ENSG00000114541 | 0.398322  | 3.598871 | 0.559478 | 1 FRMD4B         | -      |
| ENSG00000234975 | 0.390681  | 4.829559 | 0.55951  | 1 FTH1P2         | K00522 |
| ENSG00000160818 | -0.384842 | 6.361666 | 0.559801 | 1 GPATCH4        | -      |
| ENSG00000138182 | -0.384814 | 6.559363 | 0.559859 | 1 KIF20B         | K10402 |
| ENSG00000236552 | 0.38171   | 9.587257 | 0.559982 | 1 RPL13AP5       | K02872 |
| ENSG00000068305 | 0.386134  | 5.618847 | 0.560247 | 1 MEF2A          | K09260 |
| ENSG00000126561 | 0.387387  | 5.37918  | 0.560308 | 1 STAT5A         | K11223 |
| ENSG00000165637 | 0.382413  | 7.640128 | 0.560355 | 1 VDAC2          | K15040 |
| ENSG00000134369 | 0.392135  | 5.090318 | 0.560395 | 1 NAV1           | K16776 |
| ENSG00000070010 | 0.384752  | 6.165849 | 0.560609 | 1 UFD1L          | K14016 |
| ENSG00000166260 | -0.390448 | 5.361609 | 0.560816 | 1 COX11          | K02258 |
| ENSG00000142185 | -0.400401 | 4.330177 | 0.560857 | 1 TRPM2          | K04977 |

|                 |           |          |          |                |        |
|-----------------|-----------|----------|----------|----------------|--------|
| ENSG00000185344 | -0.393939 | 4.772821 | 0.560996 | 1 ATP6V0A2     | K02154 |
| ENSG00000169599 | -0.420145 | 3.40788  | 0.56102  | 1 NFU1         | -      |
| ENSG00000115806 | 0.383251  | 6.610907 | 0.56103  | 1 GORASP2      | -      |
| ENSG00000175054 | -0.386681 | 5.524552 | 0.561039 | 1 ATR          | K06640 |
| ENSG00000145020 | -0.492763 | 1.60604  | 0.561338 | 1 AMT          | K00605 |
| ENSG00000165959 | -0.492763 | 1.60604  | 0.561338 | 1 CLMN         | K15601 |
| ENSG00000217416 | -0.492763 | 1.60604  | 0.561338 | 1 ISCA1P1      | K13628 |
| ENSG00000271359 | -0.492763 | 1.60604  | 0.561338 | 1 RP11-84C13.1 | -      |
| ENSG00000196693 | -0.411039 | 3.653847 | 0.561347 | 1 ZNF33B       | K09228 |
| ENSG00000166833 | 0.388578  | 4.900408 | 0.561539 | 1 NAV2         | K19483 |
| ENSG00000037637 | 0.394837  | 4.501369 | 0.561591 | 1 FBXO42       | K10317 |
| ENSG00000158747 | 0.394837  | 4.501369 | 0.561591 | 1 NBL1         | K19558 |
| ENSG00000224531 | -0.382973 | 6.603258 | 0.561636 | 1 SMIM13       | -      |
| ENSG00000137955 | -0.380711 | 8.215149 | 0.561714 | 1 RABGGTB      | K05956 |
| ENSG00000070785 | -0.384255 | 5.558392 | 0.561796 | 1 EIF2B3       | K03241 |
| ENSG00000148019 | -0.385729 | 5.31837  | 0.561878 | 1 CEP78        | K16765 |
| ENSG00000175183 | -0.391626 | 4.894097 | 0.561902 | 1 CSRP2        | K09377 |
| ENSG00000230844 | 0.413136  | 3.354438 | 0.562029 | 1 ZNF674-AS1   | -      |
| ENSG00000113838 | -0.415057 | 3.499761 | 0.562128 | 1 TBCCD1       | K16810 |
| ENSG00000112167 | -0.468882 | 2.017823 | 0.562277 | 1 SAYSD1       | -      |
| ENSG00000185875 | -0.401427 | 3.931466 | 0.562372 | 1 THNSL1       | K05691 |
| ENSG00000205268 | -0.385962 | 5.183915 | 0.562395 | 1 PDE7A        | K18436 |
| ENSG00000072832 | -0.589441 | 0.817781 | 0.562502 | 1 CRMP1        | K07528 |
| ENSG00000130751 | -0.589441 | 0.817781 | 0.562502 | 1 NPAS1        | K09098 |
| ENSG00000270558 | -0.589441 | 0.817781 | 0.562502 | 1 CTD-2124B8.2 | K11586 |
| ENSG00000172766 | -0.39201  | 4.595808 | 0.562593 | 1 NAA16        | K00670 |
| ENSG00000048544 | -0.382469 | 6.259661 | 0.562805 | 1 MRPS10       | K02946 |
| ENSG00000104953 | -0.43285  | 2.591083 | 0.562885 | 1 TLE6         | -      |
| ENSG00000116337 | 0.381511  | 6.532391 | 0.562978 | 1 AMPD2        | K01490 |
| ENSG00000115041 | 0.423533  | 2.801752 | 0.562991 | 1 KCNIP3       | -      |
| ENSG00000188811 | -0.398472 | 3.902434 | 0.563103 | 1 NHLRC3       | K17985 |
| ENSG00000186448 | -0.403771 | 3.805579 | 0.563107 | 1 ZNF197       | K09229 |
| ENSG00000132688 | 0.385157  | 5.220924 | 0.56331  | 1 NES          | K07609 |
| ENSG00000139832 | 0.380984  | 6.477241 | 0.563322 | 1 RAB20        | K07911 |
| ENSG00000120675 | -0.381581 | 5.926967 | 0.563337 | 1 DNAJC15      | K09535 |
| ENSG00000118922 | -0.389119 | 4.676776 | 0.563489 | 1 KLF12        | K09205 |
| ENSG00000152601 | -0.380752 | 6.79129  | 0.563503 | 1 MBNL1        | K14943 |
| ENSG00000130956 | -0.388041 | 4.559107 | 0.563534 | 1 HABP4        | K19019 |
| ENSG00000120318 | -0.392104 | 4.139521 | 0.563723 | 1 ARAP3        | K12490 |
| ENSG00000148218 | 0.389041  | 4.910666 | 0.563775 | 1 ALAD         | K01698 |
| ENSG00000157470 | -0.388979 | 5.080318 | 0.564015 | 1 FAM81A       | -      |
| ENSG00000169379 | -0.388111 | 4.412595 | 0.564122 | 1 ARL13B       | K07962 |
| ENSG00000178761 | -0.385417 | 5.265854 | 0.564174 | 1 FAM219B      | -      |
| ENSG00000135486 | -0.377546 | 9.15692  | 0.564445 | 1 HNRNPA1      | K12741 |
| ENSG00000090013 | 0.385458  | 5.513151 | 0.564464 | 1 BLVRB        | K05901 |
| ENSG00000101608 | -0.378026 | 8.090771 | 0.56457  | 1 MYL12A       | K12757 |
| ENSG00000169668 | -0.434377 | 2.756145 | 0.56459  | 1 BCRP2        | K08878 |
| ENSG00000052795 | 0.429779  | 2.730697 | 0.56459  | 1 FNIP2        | K12581 |
| ENSG00000197744 | 0.429779  | 2.730697 | 0.56459  | 1 PTMAP2       | K13784 |
| ENSG00000147804 | -0.515436 | 1.470373 | 0.564607 | 1 SLC39A4      | K14710 |
| ENSG00000070756 | 0.376963  | 10.94161 | 0.564628 | 1 PABPC1       | K13126 |
| ENSG00000171236 | 0.383874  | 5.5035   | 0.564721 | 1 LRG1         | -      |
| ENSG00000149054 | -0.440304 | 2.524203 | 0.564733 | 1 ZNF215       | K09229 |
| ENSG00000160255 | 0.434733  | 2.502116 | 0.564733 | 1 ITGB2        | K06464 |
| ENSG00000182310 | 0.434733  | 2.502116 | 0.564733 | 1 SPACA6P      | -      |
| ENSG00000121039 | -0.382413 | 5.721608 | 0.564897 | 1 RDH10        | K11151 |
| ENSG00000216895 | -0.48329  | 1.91713  | 0.564915 | 1 AC009403.2   | -      |
| ENSG00000230562 | 0.452629  | 1.896097 | 0.564915 | 1 FAM133DP     | -      |

|                 |           |          |          |                 |        |
|-----------------|-----------|----------|----------|-----------------|--------|
| ENSG00000115504 | -0.385628 | 5.126164 | 0.564947 | 1 EHBP1         | -      |
| ENSG00000104131 | -0.377643 | 7.796243 | 0.565232 | 1 EIF3J         | K03245 |
| ENSG00000089289 | 0.378604  | 6.850917 | 0.565333 | 1 IGBP1         | K17606 |
| ENSG00000109220 | -0.403621 | 3.232121 | 0.565439 | 1 CHIC2         | -      |
| ENSG00000175105 | 0.403421  | 3.2151   | 0.565439 | 1 ZNF654        | -      |
| ENSG00000090061 | 0.3811    | 5.351475 | 0.565473 | 1 CCNK          | -      |
| ENSG00000184709 | -0.413124 | 3.074727 | 0.565683 | 1 LRRC26        | -      |
| ENSG00000139880 | 0.392957  | 4.341584 | 0.56582  | 1 CDH24         | K06814 |
| ENSG00000130193 | -0.380735 | 5.78888  | 0.565828 | 1 THEM6         | -      |
| ENSG00000177981 | -0.391037 | 4.58672  | 0.565854 | 1 ASB8          | K10330 |
| ENSG00000122435 | -0.388117 | 4.791891 | 0.565877 | 1 TRMT13        | K15446 |
| ENSG00000138172 | -0.425193 | 2.898039 | 0.565977 | 1 CALHM2        | K19739 |
| ENSG00000163513 | -0.385361 | 4.924673 | 0.56599  | 1 TGFBR2        | K04388 |
| ENSG00000157191 | -0.384159 | 5.36798  | 0.565994 | 1 NECAP2        | -      |
| ENSG00000122884 | 0.377438  | 7.167145 | 0.566031 | 1 P4HA1         | K00472 |
| ENSG00000235750 | -0.389569 | 4.628028 | 0.566228 | 1 KIAA0040      | -      |
| ENSG00000139116 | -0.380864 | 5.595086 | 0.566246 | 1 KIF21A        | K10395 |
| ENSG00000196743 | -0.381844 | 4.956036 | 0.566284 | 1 GM2A          | K12383 |
| ENSG00000100558 | -0.428975 | 2.689518 | 0.566334 | 1 PLEK2         | -      |
| ENSG00000135622 | -0.428975 | 2.689518 | 0.566334 | 1 SEMA4F        | K06521 |
| ENSG00000124444 | -0.406772 | 3.340003 | 0.566389 | 1 ZNF576        | -      |
| ENSG00000099917 | 0.37791   | 6.666872 | 0.56639  | 1 MED15         | K15157 |
| ENSG00000148396 | 0.377068  | 7.0487   | 0.566586 | 1 SEC16A        | -      |
| ENSG00000135124 | -0.396192 | 3.677797 | 0.566595 | 1 P2RX4         | K05218 |
| ENSG00000153823 | 0.42394   | 2.423052 | 0.566775 | 1 PID1          | -      |
| ENSG00000171208 | -0.384676 | 4.897017 | 0.566807 | 1 NETO2         | -      |
| ENSG00000153774 | -0.381934 | 5.300703 | 0.566998 | 1 CFDP1         | -      |
| ENSG00000203760 | -0.38923  | 4.422847 | 0.567246 | 1 CENPW         | -      |
| ENSG00000237457 | -0.656184 | 0.574269 | 0.567307 | 1 RP11-547I7.2  | -      |
| ENSG00000239282 | -0.656184 | 0.574269 | 0.567307 | 1 GATSL3        | -      |
| ENSG00000273314 | -0.656184 | 0.574269 | 0.567307 | 1 RP5-1136G13.2 | -      |
| ENSG00000055955 | 0.646703  | 0.50156  | 0.567307 | 1 ITIH4         | -      |
| ENSG00000124743 | 0.646703  | 0.50156  | 0.567307 | 1 KLHL31        | K10467 |
| ENSG00000183323 | 0.646703  | 0.50156  | 0.567307 | 1 CCDC125       | -      |
| ENSG00000198691 | 0.646703  | 0.50156  | 0.567307 | 1 ABCA4         | K05644 |
| ENSG00000214575 | 0.646703  | 0.50156  | 0.567307 | 1 CPEB1         | K02602 |
| ENSG00000222019 | 0.646703  | 0.50156  | 0.567307 | 1 URAHP         | K07127 |
| ENSG00000231249 | 0.646703  | 0.50156  | 0.567307 | 1 ITPR1-AS1     | -      |
| ENSG00000259248 | 0.646703  | 0.50156  | 0.567307 | 1 USP3-AS1      | -      |
| ENSG00000267422 | 0.646703  | 0.50156  | 0.567307 | 1 CTD-2554C21.1 | K19476 |
| ENSG00000106541 | -0.599971 | 0.539768 | 0.567307 | 1 AGR2          | -      |
| ENSG00000147174 | -0.599971 | 0.539768 | 0.567307 | 1 ACRC          | -      |
| ENSG00000180264 | -0.599971 | 0.539768 | 0.567307 | 1 GPR144        | K08466 |
| ENSG00000197406 | -0.599971 | 0.539768 | 0.567307 | 1 DIO3          | K07754 |
| ENSG00000228560 | -0.599971 | 0.539768 | 0.567307 | 1 RP11-550P17.5 | -      |
| ENSG00000237781 | -0.599971 | 0.539768 | 0.567307 | 1 RP11-54A4.2   | -      |
| ENSG00000248690 | -0.599971 | 0.539768 | 0.567307 | 1 HAS2-AS1      | -      |
| ENSG00000124374 | 0.565026  | 0.538185 | 0.567307 | 1 PAIP2B        | K12581 |
| ENSG00000135423 | 0.565026  | 0.538185 | 0.567307 | 1 GLS2          | K01425 |
| ENSG00000221883 | 0.565026  | 0.538185 | 0.567307 | 1 ARIH2OS       | K17985 |
| ENSG00000253978 | 0.565026  | 0.538185 | 0.567307 | 1 CTB-178M22.2  | -      |
| ENSG00000266835 | 0.565026  | 0.538185 | 0.567307 | 1 RP11-838N2.4  | -      |
| ENSG00000268061 | 0.565026  | 0.538185 | 0.567307 | 1 NAPA-AS1      | -      |
| ENSG00000269374 | 0.565026  | 0.538185 | 0.567307 | 1 CTB-50E14.5   | -      |
| ENSG00000120549 | 0.452821  | 2.123728 | 0.56732  | 1 KIAA1217      | -      |
| ENSG00000157734 | -0.441923 | 2.151513 | 0.56732  | 1 SNX22         | K17941 |
| ENSG00000261005 | 0.42904   | 2.134745 | 0.56732  | 1 CTB-58E17.1   | -      |
| ENSG00000181523 | 0.381139  | 4.955267 | 0.567359 | 1 SGSH          | K01565 |

|                 |           |          |          |             |        |
|-----------------|-----------|----------|----------|-------------|--------|
| ENSG00000174365 | -0.419938 | 2.837812 | 0.567621 | 1 SNHG11    | -      |
| ENSG00000108439 | -0.391899 | 4.283652 | 0.567676 | 1 PNPO      | K00275 |
| ENSG00000119705 | -0.380761 | 5.919755 | 0.567809 | 1 SLIRP     | K06063 |
| ENSG00000116918 | -0.380346 | 5.59055  | 0.567893 | 1 TSNAX     | -      |
| ENSG00000066654 | -0.384326 | 5.095755 | 0.567952 | 1 THUMPD1   | K06963 |
| ENSG00000144134 | -0.477464 | 1.795171 | 0.567967 | 1 RABL2A    | K07931 |
| ENSG00000166578 | 0.468046  | 1.760133 | 0.567967 | 1 IQCD      | -      |
| ENSG00000183978 | -0.38127  | 5.476195 | 0.568048 | 1 COA3      | K18175 |
| ENSG00000085415 | -0.37964  | 5.660601 | 0.568106 | 1 SEH1L     | K14299 |
| ENSG00000173674 | -0.374644 | 7.99193  | 0.568137 | 1 EIF1AX    | K03236 |
| ENSG00000079134 | -0.37864  | 5.65192  | 0.568362 | 1 THOC1     | K12878 |
| ENSG00000149809 | -0.511321 | 1.300887 | 0.568539 | 1 TM7SF2    | K00222 |
| ENSG00000169758 | -0.511321 | 1.300887 | 0.568539 | 1 C15orf27  | -      |
| ENSG00000250133 | -0.511321 | 1.300887 | 0.568539 | 1 HOXC-AS2  | -      |
| ENSG00000165804 | 0.381275  | 4.990239 | 0.568664 | 1 ZNF219    | -      |
| ENSG00000154127 | -0.378972 | 5.139877 | 0.568758 | 1 UBASH3B   | K18993 |
| ENSG00000185324 | -0.380262 | 5.424121 | 0.568764 | 1 CDK10     | K02449 |
| ENSG00000109180 | -0.375874 | 6.661096 | 0.568787 | 1 OCIAD1    | -      |
| ENSG00000176390 | -0.386598 | 4.870326 | 0.568799 | 1 CRLF3     | K17985 |
| ENSG00000186918 | 0.379127  | 5.498649 | 0.568957 | 1 ZNF395    | -      |
| ENSG00000232112 | -0.377249 | 6.074591 | 0.568984 | 1 TMA7      | K07604 |
| ENSG00000128699 | -0.38089  | 5.414914 | 0.56907  | 1 ORMDL1    | -      |
| ENSG00000166562 | -0.382554 | 4.982593 | 0.569075 | 1 SEC11C    | K13280 |
| ENSG00000170855 | -0.378975 | 5.73893  | 0.569311 | 1 TRIAP1    | K17968 |
| ENSG00000176986 | 0.37472   | 6.844417 | 0.56934  | 1 SEC24C    | K14007 |
| ENSG00000103257 | 0.372257  | 12.34702 | 0.569393 | 1 SLC7A5    | K13780 |
| ENSG00000226278 | -0.414205 | 2.774939 | 0.569406 | 1 PSPHP1    | K01079 |
| ENSG00000175581 | -0.377042 | 5.756856 | 0.569438 | 1 MRPL48    | K17429 |
| ENSG00000055609 | 0.378749  | 5.305563 | 0.569529 | 1 KMT2C     | K09188 |
| ENSG00000128915 | -0.378605 | 5.942005 | 0.569572 | 1 NARG2     | K09228 |
| ENSG00000164209 | -0.378605 | 5.942005 | 0.569572 | 1 SLC25A46  | K03454 |
| ENSG00000165646 | 0.392108  | 3.333231 | 0.569634 | 1 SLC18A2   | K08155 |
| ENSG00000035141 | -0.375545 | 6.471348 | 0.569819 | 1 FAM136A   | -      |
| ENSG00000103067 | -0.378205 | 5.597801 | 0.569964 | 1 ESRP2     | K14947 |
| ENSG00000128609 | -0.376967 | 5.886844 | 0.570019 | 1 NDUFA5    | K03949 |
| ENSG00000101346 | -0.37551  | 6.393288 | 0.570067 | 1 POFUT1    | -      |
| ENSG00000179021 | -0.387714 | 4.136994 | 0.570089 | 1 C3orf38   | -      |
| ENSG00000233237 | 0.439833  | 2.020348 | 0.570106 | 1 LINC00472 | -      |
| ENSG00000177628 | -0.404892 | 3.650273 | 0.570207 | 1 GBA       | K01201 |
| ENSG00000181027 | -0.398718 | 3.646689 | 0.570207 | 1 FKRPF     | -      |
| ENSG00000148248 | 0.395702  | 3.638226 | 0.570207 | 1 SURF4     | -      |
| ENSG00000018699 | -0.376072 | 5.373266 | 0.570338 | 1 TTC27     | -      |
| ENSG00000173068 | -0.416433 | 2.546157 | 0.570342 | 1 BNC2      | -      |
| ENSG00000107816 | 0.373812  | 6.709878 | 0.570524 | 1 LZTS2     | -      |
| ENSG00000149231 | -0.37775  | 5.528353 | 0.570557 | 1 CCDC82    | -      |
| ENSG00000160685 | 0.373402  | 6.914552 | 0.570578 | 1 ZBTB7B    | K10494 |
| ENSG00000096746 | -0.371992 | 8.262299 | 0.57066  | 1 HNRNPH3   | K12898 |
| ENSG00000189067 | 0.3726    | 7.443611 | 0.570663 | 1 LITAF     | K19363 |
| ENSG00000173156 | 0.37581   | 5.298886 | 0.57071  | 1 RHOD      | K07530 |
| ENSG00000171150 | 0.375535  | 5.777818 | 0.570777 | 1 SOCS5     | K04698 |
| ENSG00000128641 | -0.374521 | 6.325578 | 0.570837 | 1 MYO1B     | K10356 |
| ENSG00000233429 | -0.384923 | 4.111856 | 0.570861 | 1 HOTAIRM1  | -      |
| ENSG00000100345 | 0.371089  | 9.334465 | 0.570999 | 1 MYH9      | K10352 |
| ENSG00000083457 | -0.3858   | 4.566506 | 0.571115 | 1 ITGAE     | K06524 |
| ENSG00000096872 | -0.39268  | 3.799158 | 0.571118 | 1 IFT74     | K19679 |
| ENSG00000151445 | -0.401359 | 3.614896 | 0.571291 | 1 VIPAS39   | -      |
| ENSG00000133056 | 0.372863  | 6.818955 | 0.5713   | 1 PIK3C2B   | K00923 |
| ENSG00000105245 | 0.379314  | 5.044493 | 0.571511 | 1 NUMBL     | K06057 |

|                 |           |          |          |                  |        |
|-----------------|-----------|----------|----------|------------------|--------|
| ENSG00000113387 | -0.370848 | 8.758571 | 0.571539 | 1 SUB1           | K15040 |
| ENSG00000100056 | 0.379753  | 4.640026 | 0.571568 | 1 DGCR14         | K13118 |
| ENSG00000143882 | -0.419628 | 2.273916 | 0.571582 | 1 ATP6V1C2       | K02148 |
| ENSG00000171960 | -0.382428 | 4.590315 | 0.571192 | 1 PPIH           | K09567 |
| ENSG00000171791 | 0.370902  | 7.787535 | 0.572063 | 1 BCL2           | K02161 |
| ENSG00000120690 | -0.383018 | 4.882241 | 0.572189 | 1 ELF1           | K09428 |
| ENSG00000136982 | -0.376098 | 5.837166 | 0.572251 | 1 DSCC1          | K11271 |
| ENSG00000164920 | -0.387199 | 4.372981 | 0.572276 | 1 OSR2           | K09215 |
| ENSG00000196663 | 0.404561  | 3.247779 | 0.572349 | 1 TECPR2         | K13182 |
| ENSG00000177105 | 0.375098  | 6.049265 | 0.572496 | 1 RHOG           | K07863 |
| ENSG00000160401 | 0.433972  | 2.446985 | 0.572659 | 1 C9orf117       | K01056 |
| ENSG00000122490 | 0.376867  | 5.294414 | 0.572747 | 1 PQLC1          | -      |
| ENSG00000153721 | -0.408857 | 3.361522 | 0.572833 | 1 CNKSR3         | K17536 |
| ENSG00000164086 | -0.38445  | 4.782361 | 0.572852 | 1 DUSP7          | K04459 |
| ENSG00000139719 | -0.381647 | 4.780758 | 0.572852 | 1 VPS33A         | -      |
| ENSG00000235919 | -0.445301 | 1.950021 | 0.573297 | 1 ASH1L-AS1      | -      |
| ENSG00000152611 | -0.690626 | 0.238055 | 0.573302 | 1 CAPSL          | -      |
| ENSG00000152926 | -0.690626 | 0.238055 | 0.573302 | 1 ZNF117         | K09228 |
| ENSG00000174586 | -0.690626 | 0.238055 | 0.573302 | 1 ZNF497         | -      |
| ENSG00000237864 | -0.690626 | 0.238055 | 0.573302 | 1 LINC00322      | -      |
| ENSG00000258315 | -0.690626 | 0.238055 | 0.573302 | 1 C17orf49       | -      |
| ENSG00000266680 | -0.690626 | 0.238055 | 0.573302 | 1 RP5-1148A21.3  | -      |
| ENSG00000271133 | -0.690626 | 0.238055 | 0.573302 | 1 CTA-293F17.1   | -      |
| ENSG00000070729 | 0.653578  | 0.16233  | 0.573302 | 1 CNGB1          | K04952 |
| ENSG00000198569 | 0.653578  | 0.16233  | 0.573302 | 1 SLC34A3        | K14683 |
| ENSG00000205746 | 0.653578  | 0.16233  | 0.573302 | 1 RP11-1212A22.1 | K04985 |
| ENSG00000213999 | 0.653578  | 0.16233  | 0.573302 | 1 MEF2B          | K09261 |
| ENSG00000241741 | 0.653578  | 0.16233  | 0.573302 | 1 RPL7AP30       | K02936 |
| ENSG00000243279 | 0.653578  | 0.16233  | 0.573302 | 1 PRAF2          | -      |
| ENSG00000252447 | 0.653578  | 0.16233  | 0.573302 | 1 snoU13         | -      |
| ENSG00000256391 | 0.653578  | 0.16233  | 0.573302 | 1 SDIM1          | -      |
| ENSG00000273382 | 0.653578  | 0.16233  | 0.573302 | 1 RP5-1065J22.8  | -      |
| ENSG00000109133 | -0.371624 | 6.594716 | 0.573317 | 1 TMEM33         | -      |
| ENSG00000121858 | -0.543243 | 1.131148 | 0.573359 | 1 TNFSF10        | K04721 |
| ENSG00000230850 | -0.543243 | 1.131148 | 0.573359 | 1 RP11-782C8.1   | -      |
| ENSG00000269928 | -0.543243 | 1.131148 | 0.573359 | 1 RP11-849F2.8   | -      |
| ENSG00000120051 | 0.529156  | 1.059255 | 0.573359 | 1 CCDC147        | -      |
| ENSG00000234857 | 0.529156  | 1.059255 | 0.573359 | 1 HNRNPUL2-BSCL2 | K19365 |
| ENSG00000242861 | 0.529156  | 1.059255 | 0.573359 | 1 RP11-285F7.2   | -      |
| ENSG00000198948 | -0.505931 | 1.108407 | 0.573359 | 1 MFAP3L         | -      |
| ENSG00000227799 | -0.505931 | 1.108407 | 0.573359 | 1 AC012358.4     | -      |
| ENSG00000259065 | -0.505931 | 1.108407 | 0.573359 | 1 RP5-1021I20.1  | -      |
| ENSG00000120093 | 0.477008  | 1.083502 | 0.573359 | 1 HOXB3          | K09303 |
| ENSG00000244625 | 0.477008  | 1.083502 | 0.573359 | 1 CTA-211A9.5    | -      |
| ENSG00000038532 | 0.3769    | 5.24546  | 0.573377 | 1 CLEC16A        | K19513 |
| ENSG00000060762 | -0.4136   | 2.64764  | 0.573479 | 1 MPC1           | -      |
| ENSG00000072864 | 0.381169  | 4.707138 | 0.573769 | 1 NDE1           | K10352 |
| ENSG00000142686 | 0.381169  | 4.707138 | 0.573769 | 1 C1orf216       | -      |
| ENSG00000159788 | 0.39256   | 2.770872 | 0.574122 | 1 RGS12          | K16449 |
| ENSG00000130762 | 0.373971  | 5.486943 | 0.574297 | 1 ARHGEF16       | K13744 |
| ENSG00000105810 | -0.370505 | 6.645894 | 0.574358 | 1 CDK6           | K02091 |
| ENSG00000136699 | 0.370163  | 6.242663 | 0.574434 | 1 SMPD4          | K12353 |
| ENSG00000172660 | 0.385695  | 4.055037 | 0.574451 | 1 TAF15          | K14651 |
| ENSG0000013588  | 0.367515  | 9.842906 | 0.574571 | 1 GPRC5A         | K08468 |
| ENSG00000144034 | -0.37756  | 5.091896 | 0.57459  | 1 TPRKB          | K15901 |
| ENSG00000159023 | 0.376051  | 4.952447 | 0.574641 | 1 EPB41          | K06107 |
| ENSG00000072134 | 0.373435  | 5.497677 | 0.5747   | 1 EPN2           | K12471 |
| ENSG00000213563 | -0.376946 | 4.807569 | 0.574704 | 1 C8orf82        | -      |

|                 |           |          |          |   |            |              |
|-----------------|-----------|----------|----------|---|------------|--------------|
| ENSG00000145388 | -0.3772   | 4.406339 | 0.574728 | 1 | METTL14    | K05925       |
| ENSG00000104375 | -0.371306 | 6.22089  | 0.574786 | 1 | STK3       | K04412       |
| ENSG00000066926 | -0.37603  | 4.843088 | 0.574816 | 1 | FECH       | K01772       |
| ENSG00000233270 | -0.384508 | 4.181092 | 0.574829 | 1 | SNRPEP4    | K11097       |
| ENSG00000035862 | 0.367721  | 8.478529 | 0.574857 | 1 | TIMP2      | -            |
| ENSG00000152409 | 0.373719  | 5.562322 | 0.574904 | 1 | JMY        | -            |
| ENSG00000099783 | -0.367549 | 8.62469  | 0.575031 | 1 | HNRNPM     | K12887       |
| ENSG00000138623 | -0.393104 | 3.593151 | 0.575153 | 1 | SEMA7A     | K06529       |
| ENSG00000189079 | -0.376066 | 5.281689 | 0.575184 | 1 | ARID2      | K11765       |
| ENSG00000116954 | 0.37138   | 5.802424 | 0.575298 | 1 | RRAGC      | K16186       |
| ENSG00000006695 | -0.380194 | 4.622658 | 0.575383 | 1 | COX10      | K02257       |
| ENSG00000162601 | -0.371912 | 5.61934  | 0.575397 | 1 | MYSM1      | K11865       |
| ENSG00000179818 | 0.400975  | 3.147443 | 0.575425 | 1 | PCBP1-AS1  | -            |
| ENSG00000164885 | -0.378575 | 4.927533 | 0.575616 | 1 | CDK5       | K02090       |
| ENSG00000100650 | -0.367801 | 7.498048 | 0.57573  | 1 | SRSF5      | K12893       |
| ENSG00000225791 | -0.489755 | 1.531448 | 0.575777 | 1 | TRAM2-AS1  | -            |
| ENSG00000244363 | 0.471449  | 1.460711 | 0.575777 | 1 | RPL7P23    | K02937       |
| ENSG00000204775 | 0.408511  | 2.541154 | 0.575816 | 1 | KM-PA-2    | K14824       |
| ENSG00000159216 | 0.372055  | 5.389704 | 0.575886 | 1 | RUNX1      | K08367       |
| ENSG00000105639 | 0.403232  | 3.358911 | 0.575988 | 1 | JAK3       | K11218       |
| ENSG00000105538 | -0.367529 | 7.324544 | 0.576239 | 1 | RASIP1     | -            |
| ENSG00000164073 | -0.387144 | 4.014965 | 0.576266 | 1 | MFSD8      | K12307       |
| ENSG00000119801 | 0.369452  | 6.230427 | 0.576347 | 1 | YPEL5      | -            |
| ENSG00000167740 | -0.382489 | 3.552481 | 0.576412 | 1 | CYB5D2     | -            |
| ENSG00000184640 | 0.366675  | 7.747392 | 0.576483 | 1 |            | 9-Sep K16938 |
| ENSG00000155903 | -0.373986 | 4.668119 | 0.576785 | 1 | RASA2      | K08053       |
| ENSG00000166750 | -0.368704 | 6.039096 | 0.576903 | 1 | SLFN5      | K12581       |
| ENSG00000177873 | -0.436227 | 1.830843 | 0.576985 | 1 | ZNF619     | K09228       |
| ENSG00000185267 | -0.436227 | 1.830843 | 0.576985 | 1 | CDNF       | -            |
| ENSG00000164306 | -0.388455 | 3.854666 | 0.577008 | 1 | PRIMPOL    | -            |
| ENSG00000119041 | -0.374232 | 5.386933 | 0.577038 | 1 | GTF3C3     | K15201       |
| ENSG00000126773 | -0.380753 | 4.437012 | 0.577078 | 1 | PCNXL4     | K02927       |
| ENSG00000100605 | 0.37031   | 5.632186 | 0.577084 | 1 | ITPK1      | K00913       |
| ENSG00000100726 | -0.367925 | 6.168905 | 0.577118 | 1 | TELO2      | K11137       |
| ENSG00000163545 | -0.399928 | 3.115478 | 0.57712  | 1 | NUAK2      | K08800       |
| ENSG00000213430 | -0.399928 | 3.115478 | 0.57712  | 1 | HSPD1P1    | K04077       |
| ENSG00000183092 | 0.369759  | 5.453249 | 0.57715  | 1 | BEGAIN     | -            |
| ENSG00000174775 | -0.376034 | 4.885184 | 0.577154 | 1 | HRAS       | K02833       |
| ENSG00000119707 | -0.366735 | 7.224171 | 0.577207 | 1 | RBM25      | K12822       |
| ENSG00000170264 | -0.395314 | 3.227278 | 0.577313 | 1 | FAM161A    | K16772       |
| ENSG00000139926 | -0.372841 | 4.610124 | 0.577344 | 1 | FRMD6      | K16822       |
| ENSG00000136146 | -0.369089 | 5.778562 | 0.577602 | 1 | MED4       | K15146       |
| ENSG00000083844 | 0.427746  | 2.063358 | 0.577675 | 1 | ZNF264     | K09228       |
| ENSG00000203667 | -0.419496 | 2.089919 | 0.577675 | 1 | COX20      | K18184       |
| ENSG00000111906 | -0.369599 | 6.064176 | 0.57768  | 1 | HDCC2      | K07023       |
| ENSG00000185896 | 0.364766  | 8.959137 | 0.577697 | 1 | LAMP1      | K06528       |
| ENSG00000116497 | -0.372845 | 5.316163 | 0.57774  | 1 | S100PBP    | -            |
| ENSG00000183495 | 0.369534  | 5.978559 | 0.577837 | 1 | EP400      | K11320       |
| ENSG00000167904 | -0.376049 | 5.060746 | 0.577903 | 1 | TMEM68     | -            |
| ENSG00000187790 | -0.385055 | 3.82402  | 0.578095 | 1 | FANCM      | K10896       |
| ENSG00000076641 | 0.409959  | 2.277696 | 0.578107 | 1 | PAG1       | K06115       |
| ENSG00000088256 | 0.367442  | 6.149191 | 0.578243 | 1 | GNA11      | K04635       |
| ENSG00000141503 | 0.365633  | 7.024897 | 0.578445 | 1 | MINK1      | K04413       |
| ENSG00000148426 | -0.368978 | 5.756054 | 0.57848  | 1 | PROSER2    | -            |
| ENSG00000140950 | -0.375981 | 4.395967 | 0.578553 | 1 | TLDC1      | K12581       |
| ENSG00000169554 | -0.426072 | 2.655003 | 0.578596 | 1 | ZEB2       | K09299       |
| ENSG00000233223 | 0.411647  | 2.642775 | 0.578596 | 1 | AC113189.5 | -            |
| ENSG00000115677 | 0.363832  | 9.111525 | 0.578611 | 1 | HDLBP      | -            |



|                 |           |           |          |                  |        |
|-----------------|-----------|-----------|----------|------------------|--------|
| ENSG00000225484 | -0.417135 | 2.806721  | 0.578742 | 1 RP11-773D16.1  | -      |
| ENSG00000166526 | 0.370807  | 5.057762  | 0.578883 | 1 ZNF3           | K09228 |
| ENSG00000179119 | 0.370807  | 5.057762  | 0.578883 | 1 SPTY2D1        | K15193 |
| ENSG00000223414 | 0.365203  | 6.965675  | 0.578985 | 1 LINC00473      | -      |
| ENSG00000122484 | -0.37071  | 5.428191  | 0.579003 | 1 RPAP2          | -      |
| ENSG00000065665 | 0.386508  | 3.785707  | 0.579228 | 1 SEC61A2        | K10956 |
| ENSG00000145332 | -0.380784 | 3.99855   | 0.57927  | 1 KLHL8          | K10446 |
| ENSG00000247626 | -0.379965 | 4.276796  | 0.579312 | 1 MARS2          | K01874 |
| ENSG00000237493 | 0.376549  | 4.317681  | 0.579318 | 1 RP11-603J24.7  | K06109 |
| ENSG00000130935 | -0.365326 | 6.828035  | 0.579345 | 1 NOL11          | -      |
| ENSG00000182093 | 0.371058  | 4.631235  | 0.579347 | 1 WRB            | -      |
| ENSG00000226416 | -0.542729 | 0.912462  | 0.579401 | 1 MRPL23-AS1     | -      |
| ENSG00000167524 | 0.512162  | 0.836355  | 0.579401 | 1 SGK494         | K17529 |
| ENSG00000267395 | 0.512162  | 0.836355  | 0.579401 | 1 AC074212.6     | -      |
| ENSG00000130024 | -0.365218 | 6.688984  | 0.579741 | 1 PHF10          | -      |
| ENSG00000112308 | -0.363394 | 7.908991  | 0.579873 | 1 C6orf62        | -      |
| ENSG00000197345 | -0.375158 | 4.877754  | 0.579917 | 1 MRPL21         | K02888 |
| ENSG00000065802 | 0.372459  | 4.65583   | 0.579993 | 1 ASB1           | K10323 |
| ENSG00000141580 | 0.363709  | 7.277667  | 0.580088 | 1 WDR45B         | -      |
| ENSG00000176101 | -0.3657   | 5.761718  | 0.580295 | 1 SSNA1          | K16780 |
| ENSG00000011243 | 0.366256  | 6.093021  | 0.580352 | 1 AKAP8L         | K15978 |
| ENSG00000106246 | -0.381343 | 3.836294  | 0.580373 | 1 PTC1           | K17710 |
| ENSG00000138036 | -0.383525 | 3.763998  | 0.580413 | 1 DYNC2LI1       | K10417 |
| ENSG00000154493 | -0.756487 | -0.20347  | 0.580436 | 1 C10orf90       | K16773 |
| ENSG00000242282 | -0.756487 | -0.20347  | 0.580436 | 1 AC108488.4     | -      |
| ENSG00000245648 | -0.756487 | -0.20347  | 0.580436 | 1 RP11-277P12.20 | -      |
| ENSG00000255145 | -0.756487 | -0.20347  | 0.580436 | 1 RP11-60I3.5    | -      |
| ENSG00000260669 | -0.756487 | -0.20347  | 0.580436 | 1 AL136419.6     | -      |
| ENSG00000264235 | -0.756487 | -0.20347  | 0.580436 | 1 RP13-270P17.1  | -      |
| ENSG00000267390 | -0.756487 | -0.20347  | 0.580436 | 1 RP11-635N19.1  | -      |
| ENSG00000273190 | -0.756487 | -0.20347  | 0.580436 | 1 RP11-255C15.4  | -      |
| ENSG00000273352 | -0.756487 | -0.20347  | 0.580436 | 1 RP11-61L19.3   | -      |
| ENSG00000010327 | 0.666366  | -0.278753 | 0.580436 | 1 STAB1          | K19020 |
| ENSG00000066405 | 0.666366  | -0.278753 | 0.580436 | 1 CLDN18         | K06087 |
| ENSG00000116176 | 0.666366  | -0.278753 | 0.580436 | 1 TPSG1          | K09615 |
| ENSG00000148204 | 0.666366  | -0.278753 | 0.580436 | 1 CRB2           | K16681 |
| ENSG00000185065 | 0.666366  | -0.278753 | 0.580436 | 1 AC000068.5     | -      |
| ENSG00000197846 | 0.666366  | -0.278753 | 0.580436 | 1 HIST1H2BF      | K11252 |
| ENSG00000204525 | 0.666366  | -0.278753 | 0.580436 | 1 HLA-C          | K06751 |
| ENSG00000212998 | 0.666366  | -0.278753 | 0.580436 | 1 RBM12B-AS1     | -      |
| ENSG00000229092 | 0.666366  | -0.278753 | 0.580436 | 1 IGHV3-47       | K06856 |
| ENSG00000229867 | 0.666366  | -0.278753 | 0.580436 | 1 STEAP3-AS1     | -      |
| ENSG00000254554 | 0.666366  | -0.278753 | 0.580436 | 1 RP11-351I24.1  | -      |
| ENSG00000259705 | 0.666366  | -0.278753 | 0.580436 | 1 RP11-227D13.1  | -      |
| ENSG00000270562 | 0.666366  | -0.278753 | 0.580436 | 1 RP11-154H23.3  | -      |
| ENSG00000270959 | 0.666366  | -0.278753 | 0.580436 | 1 LPP-AS2        | -      |
| ENSG00000272630 | 0.666366  | -0.278753 | 0.580436 | 1 RP11-344N10.5  | -      |
| ENSG00000189227 | -0.38595  | 3.687886  | 0.580456 | 1 C15orf61       | -      |
| ENSG00000164307 | -0.369335 | 5.389022  | 0.580554 | 1 ERAP1          | K09604 |
| ENSG00000156304 | 0.369255  | 5.383405  | 0.580554 | 1 SCAF4          | K13167 |
| ENSG00000091542 | 0.365374  | 6.347252  | 0.580602 | 1 ALKBH5         | K10767 |
| ENSG00000012983 | -0.367196 | 5.697357  | 0.580651 | 1 MAP4K5         | K08833 |
| ENSG00000081721 | -0.368291 | 5.185092  | 0.580724 | 1 DUSP12         | K14819 |
| ENSG00000134461 | -0.389541 | 3.245765  | 0.580735 | 1 ANKRD16        | -      |
| ENSG00000169372 | -0.389541 | 3.245765  | 0.580735 | 1 CRADD          | K02832 |
| ENSG00000189298 | -0.389541 | 3.245765  | 0.580735 | 1 ZKSCAN3        | K09229 |
| ENSG00000175395 | -0.482593 | 1.369386  | 0.580886 | 1 ZNF25          | K09228 |
| ENSG00000135953 | -0.451001 | 1.350337  | 0.580886 | 1 MFSD9          | -      |

|                 |           |          |          |                  |        |
|-----------------|-----------|----------|----------|------------------|--------|
| ENSG00000154240 | -0.451001 | 1.350337 | 0.580886 | 1 CEP112         | K16767 |
| ENSG00000183426 | 0.395297  | 3.001845 | 0.580886 | 1 NPIPA1         | K04985 |
| ENSG00000215424 | 0.395297  | 3.001845 | 0.580886 | 1 MCM3AP-AS1     | -      |
| ENSG00000170296 | 0.364823  | 6.187662 | 0.580967 | 1 GABARAP        | K08341 |
| ENSG00000166669 | -0.404157 | 2.885675 | 0.580972 | 1 ATF7IP2        | -      |
| ENSG00000061656 | 0.390562  | 2.725257 | 0.581063 | 1 SPAG4          | -      |
| ENSG00000095139 | 0.390562  | 2.725257 | 0.581063 | 1 ARCN1          | K09228 |
| ENSG00000255508 | 0.390562  | 2.725257 | 0.581063 | 1 MIR3654        | K18709 |
| ENSG00000141084 | 0.382424  | 4.112051 | 0.581157 | 1 RANBP10        | -      |
| ENSG00000273154 | 0.469024  | 1.667    | 0.581299 | 1 RP4-583P15.15  | -      |
| ENSG00000146859 | -0.425356 | 1.700761 | 0.581299 | 1 TMEM140        | -      |
| ENSG00000154736 | -0.425356 | 1.700761 | 0.581299 | 1 ADAMTS5        | K08620 |
| ENSG00000170802 | -0.373785 | 4.542211 | 0.581437 | 1 FOXN2          | K09407 |
| ENSG00000140830 | -0.385632 | 3.734707 | 0.581651 | 1 TXNL4B         | -      |
| ENSG00000183049 | 0.371678  | 5.099357 | 0.581749 | 1 CAMK1D         | K08794 |
| ENSG00000060656 | 0.364938  | 5.225654 | 0.581992 | 1 PTPRU          | K16662 |
| ENSG00000185305 | -0.387467 | 3.48372  | 0.582017 | 1 ARL15          | K17201 |
| ENSG00000176531 | 0.375218  | 4.142276 | 0.582036 | 1 PHLDB3         | -      |
| ENSG00000135750 | 0.362145  | 7.019136 | 0.582084 | 1 KCNK1          | K04912 |
| ENSG00000112561 | 0.373275  | 4.558529 | 0.582094 | 1 TFEB           | K15590 |
| ENSG00000116161 | -0.36139  | 7.746025 | 0.58212  | 1 CACYBP         | K04507 |
| ENSG00000179632 | -0.361512 | 7.532303 | 0.582229 | 1 MAF1           | -      |
| ENSG00000139746 | -0.362277 | 6.906418 | 0.582367 | 1 RBM26          | K13192 |
| ENSG00000116586 | -0.366845 | 5.382737 | 0.582519 | 1 LAMTOR2        | -      |
| ENSG00000171163 | -0.367206 | 5.531197 | 0.582572 | 1 ZNF692         | -      |
| ENSG00000213339 | -0.364872 | 5.586006 | 0.582798 | 1 QTRT1          | K00773 |
| ENSG00000149089 | -0.365043 | 5.79837  | 0.582923 | 1 APIP           | K08964 |
| ENSG00000196705 | -0.392548 | 2.960551 | 0.582985 | 1 ZNF431         | K04613 |
| ENSG00000116898 | -0.361562 | 6.960858 | 0.583015 | 1 MRPS15         | K02956 |
| ENSG00000002919 | -0.373646 | 4.461026 | 0.583034 | 1 SNX11          | K17924 |
| ENSG00000139496 | -0.363909 | 6.070065 | 0.583058 | 1 NUPL1          | K14307 |
| ENSG00000092621 | -0.359482 | 9.375726 | 0.583108 | 1 PHGDH          | K00058 |
| ENSG00000122644 | -0.363452 | 5.82642  | 0.583146 | 1 ARL4A          | K07945 |
| ENSG00000182400 | -0.374773 | 4.41456  | 0.583148 | 1 TRAPPC6B       | -      |
| ENSG00000185404 | -0.39794  | 2.824892 | 0.583268 | 1 SP140L         | -      |
| ENSG00000211450 | -0.364838 | 5.512136 | 0.583332 | 1 C11orf31       | -      |
| ENSG00000198931 | -0.361522 | 6.807871 | 0.583341 | 1 APRT           | K00759 |
| ENSG00000100422 | 0.364749  | 5.466226 | 0.583453 | 1 CERK           | K04715 |
| ENSG00000129173 | -0.404556 | 2.67512  | 0.583598 | 1 E2F8           | K09391 |
| ENSG00000183087 | -0.404556 | 2.67512  | 0.583598 | 1 GAS6           | K05464 |
| ENSG00000155330 | -0.368947 | 4.673253 | 0.583825 | 1 C16orf87       | -      |
| ENSG00000167333 | -0.42665  | 2.516102 | 0.583986 | 1 TRIM68         | K12033 |
| ENSG00000172667 | 0.366426  | 4.956724 | 0.584094 | 1 ZMAT3          | K10137 |
| ENSG00000197321 | 0.366014  | 5.220949 | 0.584191 | 1 SVIL           | K10369 |
| ENSG00000039123 | -0.360939 | 6.68262  | 0.584207 | 1 SKIV2L2        | K12598 |
| ENSG00000117868 | 0.359576  | 7.362581 | 0.584291 | 1 ESYT2          | -      |
| ENSG00000176890 | -0.359192 | 7.810451 | 0.58435  | 1 TYMS           | K00560 |
| ENSG00000263072 | 0.394552  | 3.132658 | 0.584434 | 1 RP11-473M20.14 | -      |
| ENSG00000253309 | -0.439356 | 2.328153 | 0.584446 | 1 SERPINE3       | -      |
| ENSG00000177764 | -0.423618 | 2.318798 | 0.584446 | 1 ZCCHC3         | -      |
| ENSG00000010818 | 0.372178  | 4.2385   | 0.584461 | 1 HIVEP2         | -      |
| ENSG00000147459 | 0.361697  | 5.956785 | 0.584668 | 1 DOCK5          | K17707 |
| ENSG00000161682 | 0.367133  | 4.941079 | 0.584671 | 1 FAM171A2       | -      |
| ENSG00000096696 | 0.357834  | 9.247217 | 0.58483  | 1 DSP            | K10381 |
| ENSG00000158050 | 0.363249  | 5.981331 | 0.584839 | 1 DUSP2          | K04459 |
| ENSG00000156853 | -0.382732 | 3.499226 | 0.584863 | 1 ZNF689         | K09228 |
| ENSG00000143067 | 0.380032  | 3.486184 | 0.584863 | 1 ZNF697         | K09228 |
| ENSG00000147421 | 0.380032  | 3.486184 | 0.584863 | 1 HMBX1          | -      |

|                 |           |           |          |                    |        |
|-----------------|-----------|-----------|----------|--------------------|--------|
| ENSG00000160200 | -0.358621 | 7.752957  | 0.585006 | 1 CBS              | K01697 |
| ENSG00000102384 | -0.370812 | 4.32341   | 0.585012 | 1 CENPI            | K11501 |
| ENSG00000149357 | -0.364165 | 5.429205  | 0.585089 | 1 LAMTOR1          | -      |
| ENSG00000163312 | -0.385634 | 3.407266  | 0.585194 | 1 HELQ             | K19178 |
| ENSG00000068097 | -0.371758 | 4.601125  | 0.585405 | 1 HEATR6           | -      |
| ENSG00000164221 | -0.368564 | 4.599303  | 0.585405 | 1 CCDC112          | -      |
| ENSG00000232024 | 0.382053  | 3.693763  | 0.585409 | 1 LSM12P1          | -      |
| ENSG00000126005 | 0.374325  | 3.697263  | 0.585409 | 1 MMP24-AS1        | -      |
| ENSG00000214046 | -0.363857 | 5.242888  | 0.585432 | 1 SMIM7            | -      |
| ENSG00000050165 | -1.099898 | -0.754197 | 0.585507 | 1 DKK3             | -      |
| ENSG00000113319 | -1.099898 | -0.754197 | 0.585507 | 1 RASGRF2          | K12326 |
| ENSG00000123965 | -1.099898 | -0.754197 | 0.585507 | 1 PMS2P5           | K10858 |
| ENSG00000136327 | -1.099898 | -0.754197 | 0.585507 | 1 NKX2-8           | K09347 |
| ENSG00000158423 | -1.099898 | -0.754197 | 0.585507 | 1 RIBC1            | -      |
| ENSG00000183054 | -1.099898 | -0.754197 | 0.585507 | 1 RGPD6            | K12172 |
| ENSG00000185467 | -1.099898 | -0.754197 | 0.585507 | 1 KPNA7            | -      |
| ENSG00000214534 | -1.099898 | -0.754197 | 0.585507 | 1 ZNF705E          | K09228 |
| ENSG00000221819 | -1.099898 | -0.754197 | 0.585507 | 1 C16orf3          | -      |
| ENSG00000223799 | -1.099898 | -0.754197 | 0.585507 | 1 IL10RB-AS1       | -      |
| ENSG00000230397 | -1.099898 | -0.754197 | 0.585507 | 1 SPTLC1P1         | K00654 |
| ENSG00000231993 | -1.099898 | -0.754197 | 0.585507 | 1 RP1-85F18.5      | -      |
| ENSG00000243970 | -1.099898 | -0.754197 | 0.585507 | 1 PPIEL            | K09564 |
| ENSG00000249407 | -1.099898 | -0.754197 | 0.585507 | 1 IL20RB-AS1       | -      |
| ENSG00000260938 | -1.099898 | -0.754197 | 0.585507 | 1 RP4-593C16.3     | -      |
| ENSG00000265917 | -1.099898 | -0.754197 | 0.585507 | 1 MIR3685          | -      |
| ENSG00000269290 | -1.099898 | -0.754197 | 0.585507 | 1 RP11-869B15.1    | -      |
| ENSG00000271780 | -1.099898 | -0.754197 | 0.585507 | 1 RP11-1017G21.5   | -      |
| ENSG00000272305 | -1.099898 | -0.754197 | 0.585507 | 1 RP11-894J14.5    | K16467 |
| ENSG00000272486 | -1.099898 | -0.754197 | 0.585507 | 1 RP11-532M24.1    | -      |
| ENSG00000272644 | -1.099898 | -0.754197 | 0.585507 | 1 RP11-33O4.1      | -      |
| ENSG00000273156 | -1.099898 | -0.754197 | 0.585507 | 1 RP11-127B20.2    | -      |
| ENSG00000104870 | 1.008684  | -1.018953 | 0.585507 | 1 FCGRT            | -      |
| ENSG00000111275 | 1.008684  | -1.018953 | 0.585507 | 1 ALDH2            | K00128 |
| ENSG00000112655 | 1.008684  | -1.018953 | 0.585507 | 1 PTK7             | K05127 |
| ENSG00000131969 | 1.008684  | -1.018953 | 0.585507 | 1 ABHD12B          | K13705 |
| ENSG00000134962 | 1.008684  | -1.018953 | 0.585507 | 1 KLB              | K17985 |
| ENSG00000140057 | 1.008684  | -1.018953 | 0.585507 | 1 AK7              | K00939 |
| ENSG00000154040 | 1.008684  | -1.018953 | 0.585507 | 1 CABYR            | -      |
| ENSG00000172346 | 1.008684  | -1.018953 | 0.585507 | 1 CSDC2            | -      |
| ENSG00000174990 | 1.008684  | -1.018953 | 0.585507 | 1 CA5A             | K01672 |
| ENSG00000181585 | 1.008684  | -1.018953 | 0.585507 | 1 TMIE             | -      |
| ENSG00000182584 | 1.008684  | -1.018953 | 0.585507 | 1 ACTL10           | -      |
| ENSG00000184361 | 1.008684  | -1.018953 | 0.585507 | 1 SPATA32          | K18047 |
| ENSG00000187699 | 1.008684  | -1.018953 | 0.585507 | 1 C2orf88          | -      |
| ENSG00000204434 | 1.008684  | -1.018953 | 0.585507 | 1 POTEKP           | K17299 |
| ENSG00000205090 | 1.008684  | -1.018953 | 0.585507 | 1 TMEM240          | -      |
| ENSG00000215840 | 1.008684  | -1.018953 | 0.585507 | 1 RP11-122G18.7    | K02981 |
| ENSG00000221625 | 1.008684  | -1.018953 | 0.585507 | 1 AC013283.1       | -      |
| ENSG00000225096 | 1.008684  | -1.018953 | 0.585507 | 1 XXbac-BPG55C20.7 | -      |
| ENSG00000229715 | 1.008684  | -1.018953 | 0.585507 | 1 EEF1DP3          | K15410 |
| ENSG00000232677 | 1.008684  | -1.018953 | 0.585507 | 1 LINC00665        | -      |
| ENSG00000233081 | 1.008684  | -1.018953 | 0.585507 | 1 RP11-440G5.2     | -      |
| ENSG00000233588 | 1.008684  | -1.018953 | 0.585507 | 1 CYP51A1P2        | K05917 |
| ENSG00000235027 | 1.008684  | -1.018953 | 0.585507 | 1 AC068580.6       | -      |
| ENSG00000235257 | 1.008684  | -1.018953 | 0.585507 | 1 AC093415.2       | -      |
| ENSG00000236519 | 1.008684  | -1.018953 | 0.585507 | 1 AL773604.8       | -      |
| ENSG00000246323 | 1.008684  | -1.018953 | 0.585507 | 1 RP11-325L7.1     | -      |
| ENSG00000251532 | 1.008684  | -1.018953 | 0.585507 | 1 CTD-2245E15.3    | -      |

|                 |           |           |          |                 |        |
|-----------------|-----------|-----------|----------|-----------------|--------|
| ENSG00000253404 | 1.008684  | -1.018953 | 0.585507 | 1 AC034243.1    | -      |
| ENSG00000258081 | 1.008684  | -1.018953 | 0.585507 | 1 RP11-384J4.2  | -      |
| ENSG00000260082 | 1.008684  | -1.018953 | 0.585507 | 1 RP11-2C24.5   | -      |
| ENSG00000260787 | 1.008684  | -1.018953 | 0.585507 | 1 RP11-797A18.4 | -      |
| ENSG00000261366 | 1.008684  | -1.018953 | 0.585507 | 1 MANEA-AS1     | -      |
| ENSG00000261485 | 1.008684  | -1.018953 | 0.585507 | 1 PAN3-AS1      | -      |
| ENSG00000262482 | 1.008684  | -1.018953 | 0.585507 | 1 LA16c-321D4.2 | -      |
| ENSG00000263264 | 1.008684  | -1.018953 | 0.585507 | 1 CTB-133G6.1   | -      |
| ENSG00000267543 | 1.008684  | -1.018953 | 0.585507 | 1 RP11-666A8.7  | -      |
| ENSG00000270184 | 1.008684  | -1.018953 | 0.585507 | 1 RP11-568J23.5 | -      |
| ENSG00000101204 | -0.933277 | -0.848055 | 0.585507 | 1 CHRNA4        | -      |
| ENSG00000106560 | -0.933277 | -0.848055 | 0.585507 | 1 GIMAP2        | K04613 |
| ENSG00000116254 | -0.933277 | -0.848055 | 0.585507 | 1 CHD5          | K14435 |
| ENSG00000116652 | -0.933277 | -0.848055 | 0.585507 | 1 DLEU2L        | -      |
| ENSG00000120729 | -0.933277 | -0.848055 | 0.585507 | 1 MYOT          | -      |
| ENSG00000132622 | -0.933277 | -0.848055 | 0.585507 | 1 HSPA12B       | -      |
| ENSG00000133808 | -0.933277 | -0.848055 | 0.585507 | 1 MICALCL       | -      |
| ENSG00000149201 | -0.933277 | -0.848055 | 0.585507 | 1 CCDC81        | K08857 |
| ENSG00000159224 | -0.933277 | -0.848055 | 0.585507 | 1 GIP           | K05258 |
| ENSG00000172771 | -0.933277 | -0.848055 | 0.585507 | 1 EFCAB12       | -      |
| ENSG00000186665 | -0.933277 | -0.848055 | 0.585507 | 1 C17orf58      | -      |
| ENSG00000186842 | -0.933277 | -0.848055 | 0.585507 | 1 LINC00846     | -      |
| ENSG00000197283 | -0.933277 | -0.848055 | 0.585507 | 1 SYNGAP1       | K17631 |
| ENSG00000198400 | -0.933277 | -0.848055 | 0.585507 | 1 NTRK1         | K03176 |
| ENSG00000203588 | -0.933277 | -0.848055 | 0.585507 | 1 IGBP1-AS1     | -      |
| ENSG00000204377 | -0.933277 | -0.848055 | 0.585507 | 1 C1orf134      | -      |
| ENSG00000207047 | -0.933277 | -0.848055 | 0.585507 | 1 SNORD51       | -      |
| ENSG00000214391 | -0.933277 | -0.848055 | 0.585507 | 1 RP11-121L10.3 | K07374 |
| ENSG00000223701 | -0.933277 | -0.848055 | 0.585507 | 1 RAET1E-AS1    | -      |
| ENSG00000224066 | -0.933277 | -0.848055 | 0.585507 | 1 RP4-622L5.7   | -      |
| ENSG00000224418 | -0.933277 | -0.848055 | 0.585507 | 1 STK24-AS1     | -      |
| ENSG00000224997 | -0.933277 | -0.848055 | 0.585507 | 1 AL049840.1    | -      |
| ENSG00000228140 | -0.933277 | -0.848055 | 0.585507 | 1 RP3-467K16.4  | -      |
| ENSG00000229647 | -0.933277 | -0.848055 | 0.585507 | 1 AC007879.7    | -      |
| ENSG00000233025 | -0.933277 | -0.848055 | 0.585507 | 1 CRYZP1        | K00344 |
| ENSG00000236581 | -0.933277 | -0.848055 | 0.585507 | 1 STARD13-AS    | -      |
| ENSG00000237611 | -0.933277 | -0.848055 | 0.585507 | 1 AL353898.3    | K11447 |
| ENSG00000239103 | -0.933277 | -0.848055 | 0.585507 | 1 snoU13        | -      |
| ENSG00000246560 | -0.933277 | -0.848055 | 0.585507 | 1 RP11-10L12.4  | -      |
| ENSG00000252915 | -0.933277 | -0.848055 | 0.585507 | 1 Y_RNA         | -      |
| ENSG00000257660 | -0.933277 | -0.848055 | 0.585507 | 1 RP11-579D7.4  | -      |
| ENSG00000258608 | -0.933277 | -0.848055 | 0.585507 | 1 DNAJC19P9     | K09539 |
| ENSG00000259529 | -0.933277 | -0.848055 | 0.585507 | 1 RP11-468E2.4  | K11974 |
| ENSG00000260081 | -0.933277 | -0.848055 | 0.585507 | 1 RP11-66N11.8  | -      |
| ENSG00000261286 | -0.933277 | -0.848055 | 0.585507 | 1 RP11-517C16.2 | -      |
| ENSG00000263276 | -0.933277 | -0.848055 | 0.585507 | 1 RP11-96D1.10  | -      |
| ENSG00000264350 | -0.933277 | -0.848055 | 0.585507 | 1 SNRPGP2       | K11099 |
| ENSG00000265806 | -0.933277 | -0.848055 | 0.585507 | 1 MIR4292       | -      |
| ENSG00000266969 | -0.933277 | -0.848055 | 0.585507 | 1 RP11-773H22.4 | -      |
| ENSG00000005001 | 0.698443  | -0.91035  | 0.585507 | 1 PRSS22        | K09626 |
| ENSG00000088854 | 0.698443  | -0.91035  | 0.585507 | 1 C20orf194     | K10687 |
| ENSG00000102144 | 0.698443  | -0.91035  | 0.585507 | 1 PGK1          | K00927 |
| ENSG00000124664 | 0.698443  | -0.91035  | 0.585507 | 1 SPDEF         | K09442 |
| ENSG00000138131 | 0.698443  | -0.91035  | 0.585507 | 1 LOXL4         | K00280 |
| ENSG00000143001 | 0.698443  | -0.91035  | 0.585507 | 1 TMEM61        | -      |
| ENSG00000155918 | 0.698443  | -0.91035  | 0.585507 | 1 RAET1L        | K07987 |
| ENSG00000161298 | 0.698443  | -0.91035  | 0.585507 | 1 ZNF382        | K09228 |
| ENSG00000165837 | 0.698443  | -0.91035  | 0.585507 | 1 FAM194B       | -      |

|                 |           |          |          |                 |        |
|-----------------|-----------|----------|----------|-----------------|--------|
| ENSG00000168124 | 0.698443  | -0.91035 | 0.585507 | 1 OR1F1         | K04257 |
| ENSG00000170075 | 0.698443  | -0.91035 | 0.585507 | 1 GPR37L1       | K04244 |
| ENSG00000201457 | 0.698443  | -0.91035 | 0.585507 | 1 SNORA55       | -      |
| ENSG00000207757 | 0.698443  | -0.91035 | 0.585507 | 1 MIR93         | -      |
| ENSG00000213590 | 0.698443  | -0.91035 | 0.585507 | 1 RP11-229P13.2 | K16467 |
| ENSG00000224520 | 0.698443  | -0.91035 | 0.585507 | 1 KRT8P45       | K07605 |
| ENSG00000228436 | 0.698443  | -0.91035 | 0.585507 | 1 RP5-864K19.4  | -      |
| ENSG00000231346 | 0.698443  | -0.91035 | 0.585507 | 1 LINC01160     | -      |
| ENSG00000231563 | 0.698443  | -0.91035 | 0.585507 | 1 RP11-245P10.4 | -      |
| ENSG00000232295 | 0.698443  | -0.91035 | 0.585507 | 1 RP11-154D6.1  | -      |
| ENSG00000233452 | 0.698443  | -0.91035 | 0.585507 | 1 STXBP5-AS1    | -      |
| ENSG00000235111 | 0.698443  | -0.91035 | 0.585507 | 1 RP1-29C18.8   | -      |
| ENSG00000235285 | 0.698443  | -0.91035 | 0.585507 | 1 SMIM2-IT1     | -      |
| ENSG00000236184 | 0.698443  | -0.91035 | 0.585507 | 1 TCEA1P4       | K03145 |
| ENSG00000237813 | 0.698443  | -0.91035 | 0.585507 | 1 AC002066.1    | -      |
| ENSG00000238528 | 0.698443  | -0.91035 | 0.585507 | 1 snoU13        | -      |
| ENSG00000243960 | 0.698443  | -0.91035 | 0.585507 | 1 RP11-552M11.4 | -      |
| ENSG00000250474 | 0.698443  | -0.91035 | 0.585507 | 1 WBP1LP2       | -      |
| ENSG00000252196 | 0.698443  | -0.91035 | 0.585507 | 1 AL590482.1    | -      |
| ENSG00000254862 | 0.698443  | -0.91035 | 0.585507 | 1 RP11-159H22.2 | -      |
| ENSG00000255139 | 0.698443  | -0.91035 | 0.585507 | 1 AP000442.1    | -      |
| ENSG00000256293 | 0.698443  | -0.91035 | 0.585507 | 1 RP11-114F3.2  | K02150 |
| ENSG00000257949 | 0.698443  | -0.91035 | 0.585507 | 1 TEN1          | -      |
| ENSG00000258136 | 0.698443  | -0.91035 | 0.585507 | 1 RP11-864J10.4 | -      |
| ENSG00000260978 | 0.698443  | -0.91035 | 0.585507 | 1 RP11-73C9.1   | -      |
| ENSG00000261337 | 0.698443  | -0.91035 | 0.585507 | 1 RP11-498D10.5 | -      |
| ENSG00000263597 | 0.698443  | -0.91035 | 0.585507 | 1 MIR3936       | -      |
| ENSG00000268584 | 0.698443  | -0.91035 | 0.585507 | 1 RP11-464F9.20 | -      |
| ENSG00000269781 | 0.698443  | -0.91035 | 0.585507 | 1 FLJ20306      | K12581 |
| ENSG00000271857 | 0.698443  | -0.91035 | 0.585507 | 1 RP1-244F24.1  | -      |
| ENSG00000273188 | 0.698443  | -0.91035 | 0.585507 | 1 RP3-402G11.25 | -      |
| ENSG00000214765 | -0.375914 | 3.956793 | 0.585546 | 1 SEPT7P2       | K16944 |
| ENSG00000130517 | -0.388954 | 3.309039 | 0.585567 | 1 PGPEP1        | K01304 |
| ENSG00000108666 | -0.369431 | 4.557145 | 0.585577 | 1 C17orf75      | -      |
| ENSG00000175294 | 0.422905  | 1.825426 | 0.585652 | 1 CATSPER1      | K16889 |
| ENSG00000185670 | 0.422905  | 1.825426 | 0.585652 | 1 ZBTB3         | K10490 |
| ENSG00000174456 | 0.378306  | 3.620756 | 0.585727 | 1 C12orf76      | -      |
| ENSG00000147684 | -0.357804 | 7.869876 | 0.585745 | 1 NDUFB9        | K03965 |
| ENSG00000071655 | -0.359789 | 6.529901 | 0.585752 | 1 MBD3          | K11591 |
| ENSG00000154059 | -0.372045 | 4.303596 | 0.585923 | 1 IMPACT        | -      |
| ENSG00000173933 | 0.367825  | 4.464215 | 0.585953 | 1 RBM4          | K13187 |
| ENSG00000143751 | 0.360276  | 5.485963 | 0.585954 | 1 SDE2          | K17985 |
| ENSG00000165338 | -0.368696 | 4.624377 | 0.585976 | 1 HECTD2        | K12232 |
| ENSG00000013523 | -0.375831 | 3.548635 | 0.58608  | 1 ANGEL1        | K18729 |
| ENSG00000103187 | -0.357642 | 7.604964 | 0.586188 | 1 COTL1         | -      |
| ENSG00000213465 | -0.363631 | 5.502509 | 0.586261 | 1 ARL2          | K07943 |
| ENSG00000196235 | 0.357948  | 7.128962 | 0.586302 | 1 SUPT5H        | K15172 |
| ENSG00000109111 | 0.358099  | 6.975103 | 0.586377 | 1 SUPT6H        | K11292 |
| ENSG00000066230 | 0.452237  | 1.523758 | 0.586413 | 1 SLC9A3        | K12040 |
| ENSG00000249592 | 0.452237  | 1.523758 | 0.586413 | 1 RP11-440L14.1 | -      |
| ENSG00000107864 | 0.386325  | 3.081944 | 0.586478 | 1 CPEB3         | K02602 |
| ENSG00000096717 | -0.362231 | 5.588739 | 0.586541 | 1 SIRT1         | K11411 |
| ENSG00000175213 | 0.36657   | 4.322156 | 0.586613 | 1 ZNF408        | -      |
| ENSG00000138101 | 0.368364  | 3.663104 | 0.586817 | 1 DTNB          | -      |
| ENSG00000162929 | -0.367288 | 4.564555 | 0.58694  | 1 KIAA1841      | -      |
| ENSG00000145907 | -0.356725 | 7.778915 | 0.586963 | 1 G3BP1         | K17265 |
| ENSG00000198911 | 0.356828  | 7.45234  | 0.58706  | 1 SREBF2        | K09107 |
| ENSG00000173715 | 0.371244  | 4.22213  | 0.587131 | 1 C11orf80      | -      |

|                 |           |          |          |                 |              |
|-----------------|-----------|----------|----------|-----------------|--------------|
| ENSG00000072518 | 0.36846   | 4.513116 | 0.587162 | 1 MARK2         | K08798       |
| ENSG00000118690 | 0.50037   | 1.142083 | 0.587167 | 1 ARMC2         | -            |
| ENSG00000242599 | 0.50037   | 1.142083 | 0.587167 | 1 CSAG4         | -            |
| ENSG00000234129 | -0.473344 | 1.18642  | 0.587167 | 1 RP11-120D5.1  | -            |
| ENSG00000145217 | -0.541987 | 0.653808 | 0.587191 | 1 SLC26A1       | K14700       |
| ENSG00000150281 | -0.541987 | 0.653808 | 0.587191 | 1 CTF1          | K05422       |
| ENSG00000180096 | -0.541987 | 0.653808 | 0.587191 | 1               | 1-Sep K13737 |
| ENSG00000198835 | -0.541987 | 0.653808 | 0.587191 | 1 GJC2          | K07619       |
| ENSG00000250151 | -0.541987 | 0.653808 | 0.587191 | 1 ARPC4-TTLL3   | K05755       |
| ENSG00000258659 | -0.541987 | 0.653808 | 0.587191 | 1 TRIM34        | K11999       |
| ENSG00000261408 | -0.541987 | 0.653808 | 0.587191 | 1 TEN1-CDK3     | -            |
| ENSG00000204370 | -0.359611 | 5.806223 | 0.587311 | 1 SDHD          | K00237       |
| ENSG00000168297 | -0.381504 | 3.792706 | 0.587438 | 1 P XK          | K17543       |
| ENSG00000123136 | 0.356683  | 7.17953  | 0.587555 | 1 DDX39A        | K13182       |
| ENSG00000164904 | -0.357335 | 6.886593 | 0.587563 | 1 ALDH7A1       | K14085       |
| ENSG00000143228 | -0.36009  | 5.887609 | 0.587715 | 1 NUF2          | K11548       |
| ENSG00000167085 | -0.355674 | 8.012184 | 0.587848 | 1 PHB           | K17080       |
| ENSG00000167978 | 0.355184  | 8.612218 | 0.587871 | 1 SRRM2         | K13172       |
| ENSG00000116120 | -0.35925  | 6.216805 | 0.588015 | 1 FARSB         | K01890       |
| ENSG00000148384 | -0.379036 | 4.060222 | 0.588066 | 1 INPP5E        | K01099       |
| ENSG00000176124 | -0.3652   | 4.71051  | 0.588097 | 1 DLEU1         | -            |
| ENSG00000185883 | 0.360702  | 5.22331  | 0.588133 | 1 ATP6V0C       | K02155       |
| ENSG00000067836 | 0.367089  | 4.198442 | 0.588141 | 1 ROGDI         | -            |
| ENSG00000105393 | -0.359621 | 6.02775  | 0.588207 | 1 BABAM1        | -            |
| ENSG00000112742 | -0.357368 | 6.535112 | 0.588268 | 1 TTK           | K08866       |
| ENSG00000136932 | -0.386289 | 3.639492 | 0.588293 | 1 C9orf156      | -            |
| ENSG00000135480 | -0.354342 | 10.07927 | 0.58831  | 1 KRT7          | K07605       |
| ENSG00000196083 | -0.358269 | 6.07593  | 0.588416 | 1 IL1RAP        | K04723       |
| ENSG00000106780 | 0.366657  | 4.725581 | 0.58859  | 1 MEGF9         | K17985       |
| ENSG00000166831 | -0.383585 | 3.32652  | 0.588751 | 1 RBPMS2        | -            |
| ENSG00000205323 | 0.380582  | 3.307095 | 0.588751 | 1 SARNP         | K18732       |
| ENSG00000074964 | 0.372358  | 3.922464 | 0.588826 | 1 ARHGGEF10L    | K16727       |
| ENSG00000225921 | -0.355148 | 7.530914 | 0.588886 | 1 NOL7          | -            |
| ENSG00000105520 | 0.357087  | 6.021095 | 0.588997 | 1 DKFZP761J1410 | K19581       |
| ENSG00000174132 | -0.363482 | 4.843044 | 0.589052 | 1 FAM174A       | -            |
| ENSG00000256393 | 0.42631   | 1.988286 | 0.589173 | 1 AC138123.2    | K02928       |
| ENSG00000119335 | -0.353453 | 9.541392 | 0.589376 | 1 SET           | K11290       |
| ENSG00000174109 | -0.363451 | 5.028882 | 0.589414 | 1 C16orf91      | -            |
| ENSG00000115556 | 0.398739  | 2.518731 | 0.589438 | 1 PLCD4         | K05857       |
| ENSG00000183814 | -0.361005 | 4.862735 | 0.589489 | 1 LIN9          | -            |
| ENSG00000126522 | -0.370021 | 4.126837 | 0.589564 | 1 ASL           | K01755       |
| ENSG00000170473 | -0.357995 | 5.590559 | 0.58961  | 1 WIBG          | K14294       |
| ENSG00000160917 | -0.35919  | 5.191084 | 0.589699 | 1 CPSF4         | K14404       |
| ENSG00000183340 | -0.359895 | 5.570428 | 0.589758 | 1 JRKL          | -            |
| ENSG00000077150 | -0.353744 | 7.743615 | 0.590126 | 1 NFKB2         | -            |
| ENSG00000075539 | 0.362745  | 4.841966 | 0.590165 | 1 FRYL          | -            |
| ENSG00000178105 | -0.360416 | 5.412853 | 0.590172 | 1 DDX10         | K14776       |
| ENSG00000139239 | 0.357637  | 5.993783 | 0.590212 | 1 RPL14P1       | K02875       |
| ENSG00000267121 | 0.366797  | 3.995918 | 0.590415 | 1 CTD-2020K17.1 | -            |
| ENSG00000167767 | 0.352919  | 8.057061 | 0.590597 | 1 KRT80         | K07605       |
| ENSG00000009780 | -0.411961 | 2.353186 | 0.590607 | 1 FAM76A        | K08834       |
| ENSG00000186591 | 0.353478  | 7.368146 | 0.590672 | 1 UBE2H         | K10576       |
| ENSG00000177889 | -0.354983 | 6.522792 | 0.590792 | 1 UBE2N         | K10580       |
| ENSG00000090447 | -0.361013 | 5.094428 | 0.59089  | 1 TFAP4         | K09108       |
| ENSG00000204922 | -0.361013 | 5.094428 | 0.59089  | 1 C11orf83      | K15696       |
| ENSG00000138835 | -0.39554  | 2.988523 | 0.591024 | 1 RGS3          | K07524       |
| ENSG00000135655 | 0.354155  | 6.33856  | 0.591178 | 1 USP15         | K11835       |
| ENSG00000174564 | -0.356079 | 5.748757 | 0.591321 | 1 IL20RB        | K05137       |

|                 |           |          |          |                  |        |
|-----------------|-----------|----------|----------|------------------|--------|
| ENSG00000182919 | 0.357352  | 5.150983 | 0.591345 | 1 C11orf54       | -      |
| ENSG00000185621 | -0.388326 | 2.632789 | 0.591473 | 1 LMLN           | K13539 |
| ENSG00000066735 | 0.353922  | 6.288862 | 0.591593 | 1 KIF26A         | K10404 |
| ENSG00000102054 | 0.35128   | 9.126146 | 0.591754 | 1 RBBP7          | K11659 |
| ENSG00000144354 | -0.354845 | 6.197855 | 0.591957 | 1 CDCA7          | -      |
| ENSG00000149499 | -0.357526 | 5.467312 | 0.592013 | 1 EML3           | K18596 |
| ENSG00000133874 | -0.424038 | 2.140857 | 0.592079 | 1 RNF122         | K15699 |
| ENSG00000188643 | -0.351519 | 8.063027 | 0.59217  | 1 S100A16        | -      |
| ENSG00000136810 | -0.350952 | 8.863553 | 0.592263 | 1 TXN            | K03671 |
| ENSG00000162783 | -0.352697 | 6.919537 | 0.592362 | 1 IER5           | -      |
| ENSG00000053770 | -0.359265 | 4.707134 | 0.592513 | 1 AP5M1          | K19023 |
| ENSG00000247708 | 0.472978  | 1.345477 | 0.592573 | 1 STX18-AS1      | -      |
| ENSG00000186806 | 0.431361  | 1.365073 | 0.592573 | 1 VSIG10L        | -      |
| ENSG00000134717 | -0.354593 | 6.006123 | 0.59271  | 1 BTF3L4         | K01527 |
| ENSG00000184208 | -0.372285 | 3.845354 | 0.592804 | 1 C22orf46       | -      |
| ENSG00000158195 | 0.352041  | 6.823923 | 0.59298  | 1 WASF2          | K05748 |
| ENSG00000219200 | -0.366404 | 4.428808 | 0.592998 | 1 RNASEK         | K19770 |
| ENSG00000147044 | -0.362794 | 4.42675  | 0.592998 | 1 CASK           | K06103 |
| ENSG00000148362 | -0.354274 | 5.755259 | 0.593101 | 1 C9orf142       | -      |
| ENSG00000165487 | -0.355167 | 5.424113 | 0.59316  | 1 MICU2          | -      |
| ENSG00000118518 | -0.371542 | 4.139333 | 0.593184 | 1 RNF146         | -      |
| ENSG00000156381 | 0.354854  | 5.456256 | 0.5932   | 1 ANKRD9         | -      |
| ENSG00000029363 | -0.352103 | 6.789819 | 0.593232 | 1 BCLAF1         | K13087 |
| ENSG00000135446 | -0.351099 | 7.446351 | 0.593243 | 1 CDK4           | -      |
| ENSG00000101216 | 0.357298  | 5.128557 | 0.593398 | 1 GMEB2          | -      |
| ENSG00000174669 | -0.353757 | 5.658019 | 0.593402 | 1 SLC29A2        | K15014 |
| ENSG00000123843 | -0.350007 | 8.492701 | 0.593458 | 1 C4BPB          | K04003 |
| ENSG00000215158 | -0.389434 | 2.932021 | 0.593564 | 1 RP11-1023L17.1 | K01195 |
| ENSG00000237190 | -0.353377 | 5.728257 | 0.593668 | 1 CDKN2AIPNL     | K12581 |
| ENSG00000133816 | -0.360653 | 4.652469 | 0.593679 | 1 MICAL2         | -      |
| ENSG00000186908 | -0.357384 | 4.713816 | 0.593726 | 1 ZDHHC17        | K18932 |
| ENSG00000139517 | 0.365301  | 4.073617 | 0.593736 | 1 LNX2           | K10692 |
| ENSG00000160392 | 0.365301  | 4.073617 | 0.593736 | 1 C19orf47       | -      |
| ENSG00000130150 | -0.355961 | 4.880666 | 0.593845 | 1 MOSPD2         | -      |
| ENSG00000088280 | 0.361607  | 4.324387 | 0.593916 | 1 ASAP3          | K12488 |
| ENSG00000130669 | 0.351786  | 6.001334 | 0.594027 | 1 PAK4           | K05734 |
| ENSG00000163002 | -0.357874 | 4.674917 | 0.594109 | 1 NUP35          | K14313 |
| ENSG00000062582 | 0.354125  | 5.829691 | 0.594118 | 1 MRPS24         | K17403 |
| ENSG00000121690 | 0.356962  | 5.400151 | 0.594136 | 1 DEPDC7         | -      |
| ENSG00000140455 | 0.352166  | 5.961005 | 0.594176 | 1 USP3           | K11986 |
| ENSG00000127666 | 0.353751  | 5.506401 | 0.594182 | 1 TICAM1         | K05842 |
| ENSG00000239672 | -0.35015  | 7.490363 | 0.594187 | 1 NME1           | K00940 |
| ENSG00000141526 | 0.348906  | 9.208852 | 0.594228 | 1 SLC16A3        | K08180 |
| ENSG00000154229 | 0.35349   | 5.698809 | 0.594258 | 1 PRKCA          | K02677 |
| ENSG00000100564 | -0.363325 | 4.202478 | 0.594397 | 1 PIGH           | K03858 |
| ENSG00000088836 | 0.419815  | 2.240736 | 0.594519 | 1 SLC4A11        | K13862 |
| ENSG00000023318 | 0.349661  | 7.400208 | 0.594648 | 1 ERP44          | K17264 |
| ENSG00000162819 | -0.352035 | 5.844837 | 0.594861 | 1 BROX           | -      |
| ENSG00000157240 | -0.405923 | 2.800129 | 0.594874 | 1 FZD1           | K02432 |
| ENSG00000165879 | 0.377789  | 2.77771  | 0.594874 | 1 FRAT1          | K03069 |
| ENSG00000173402 | 0.349022  | 7.771225 | 0.594937 | 1 DAG1           | K06265 |
| ENSG00000100578 | -0.386037 | 3.348247 | 0.594983 | 1 KIAA0586       | -      |
| ENSG00000174943 | -0.375818 | 3.49523  | 0.59499  | 1 KCTD13         | K15074 |
| ENSG00000149925 | 0.348011  | 9.832605 | 0.595002 | 1 ALDOA          | K01623 |
| ENSG00000007516 | 0.538229  | 0.905334 | 0.595081 | 1 BAIAP3         | K15621 |
| ENSG00000142408 | 0.538229  | 0.905334 | 0.595081 | 1 CACNG8         | K04873 |
| ENSG00000271971 | 0.538229  | 0.905334 | 0.595081 | 1 CTD-2006H14.2  | -      |
| ENSG00000257261 | 0.479736  | 0.932498 | 0.595081 | 1 RP11-96H19.1   | -      |

|                 |           |          |          |                 |        |
|-----------------|-----------|----------|----------|-----------------|--------|
| ENSG00000105402 | 0.351704  | 6.129211 | 0.59515  | 1 NAPA          | K15296 |
| ENSG00000184857 | -0.357513 | 4.796508 | 0.595307 | 1 TMEM186       | -      |
| ENSG00000259781 | -0.350793 | 6.473399 | 0.595307 | 1 RP11-673C5.1  | K10802 |
| ENSG00000140694 | -0.353593 | 5.360521 | 0.595404 | 1 PARN          | K01148 |
| ENSG00000164751 | -0.358784 | 5.157126 | 0.595494 | 1 PEX2          | -      |
| ENSG00000130309 | -0.34831  | 8.113243 | 0.595511 | 1 COLGALT1      | K11703 |
| ENSG00000103512 | 0.349949  | 6.625546 | 0.595553 | 1 NOMO1         | -      |
| ENSG00000105821 | -0.350058 | 6.615926 | 0.595746 | 1 DNAJC2        | K09522 |
| ENSG00000156030 | 0.355745  | 5.169411 | 0.59578  | 1 ELMSAN1       | K12581 |
| ENSG00000169592 | -0.356161 | 5.49379  | 0.59582  | 1 INO80E        | K11669 |
| ENSG00000170445 | -0.349935 | 6.2886   | 0.596063 | 1 HARS          | K01892 |
| ENSG00000119862 | -0.361093 | 4.12173  | 0.596181 | 1 LGALSL        | -      |
| ENSG0000019485  | -0.393523 | 2.87945  | 0.596309 | 1 PRDM11        | -      |
| ENSG00000132825 | -0.393523 | 2.87945  | 0.596309 | 1 PPP1R3D       | K07189 |
| ENSG00000178082 | 0.382284  | 2.86443  | 0.596309 | 1 TWF1P1        | K08870 |
| ENSG00000133812 | 0.352996  | 5.527505 | 0.596483 | 1 SBF2          | K18061 |
| ENSG00000050555 | 0.350752  | 5.794506 | 0.59658  | 1 LAMC3         | K06247 |
| ENSG00000264538 | 0.366637  | 3.700754 | 0.596589 | 1 SUZ12P        | K17985 |
| ENSG00000134815 | -0.357628 | 4.874714 | 0.596723 | 1 DHX34         | -      |
| ENSG00000213918 | 0.357796  | 3.854458 | 0.597147 | 1 DNASE1        | K11994 |
| ENSG00000148411 | 0.351798  | 5.541719 | 0.597374 | 1 NACC2         | K10486 |
| ENSG00000012211 | 0.684418  | 0.269641 | 0.597593 | 1 PRICKLE3      | K04511 |
| ENSG00000138744 | 0.684418  | 0.269641 | 0.597593 | 1 NAAA          | K13720 |
| ENSG00000186326 | 0.684418  | 0.269641 | 0.597593 | 1 RGS9BP        | -      |
| ENSG00000204209 | 0.684418  | 0.269641 | 0.597593 | 1 DAXX          | K02308 |
| ENSG00000230071 | 0.684418  | 0.269641 | 0.597593 | 1 RPL4P6        | K02930 |
| ENSG00000231503 | 0.684418  | 0.269641 | 0.597593 | 1 PTMAP4        | K13784 |
| ENSG00000243926 | 0.684418  | 0.269641 | 0.597593 | 1 TIPARP-AS1    | -      |
| ENSG00000260806 | 0.684418  | 0.269641 | 0.597593 | 1 RP11-872J21.3 | -      |
| ENSG00000261643 | 0.684418  | 0.269641 | 0.597593 | 1 RP11-529E10.6 | -      |
| ENSG00000269951 | 0.684418  | 0.269641 | 0.597593 | 1 RP11-797A18.6 | -      |
| ENSG00000008323 | -0.60742  | 0.377228 | 0.597593 | 1 PLEKHG6       | K10408 |
| ENSG00000126953 | -0.60742  | 0.377228 | 0.597593 | 1 TIMM8A        | K17780 |
| ENSG00000232640 | -0.60742  | 0.377228 | 0.597593 | 1 RP1-266L20.2  | -      |
| ENSG00000236921 | -0.60742  | 0.377228 | 0.597593 | 1 RP11-408N14.1 | -      |
| ENSG00000245848 | -0.60742  | 0.377228 | 0.597593 | 1 CEBPA         | K09055 |
| ENSG00000266501 | -0.60742  | 0.377228 | 0.597593 | 1 RP11-766H1.1  | K08336 |
| ENSG00000186831 | -0.540826 | 0.33714  | 0.597593 | 1 KRT17P2       | K07604 |
| ENSG00000246922 | -0.540826 | 0.33714  | 0.597593 | 1 UBAP1L        | K09488 |
| ENSG00000165572 | 0.349666  | 5.365414 | 0.597708 | 1 KBTBD6        | K10474 |
| ENSG00000183137 | -0.354059 | 4.68855  | 0.5978   | 1 CEP57L1       | K16762 |
| ENSG00000058804 | -0.347101 | 7.181464 | 0.59782  | 1 NDC1          | K14315 |
| ENSG00000110315 | -0.352724 | 4.997671 | 0.597893 | 1 RNF141        | K11447 |
| ENSG00000168405 | -0.399377 | 2.735525 | 0.597951 | 1 CMAHP         | K08080 |
| ENSG00000148219 | -0.38752  | 2.728579 | 0.597951 | 1 ASTN2         | -      |
| ENSG00000140092 | 0.360532  | 3.786052 | 0.598011 | 1 FBLN5         | K17340 |
| ENSG00000246067 | 0.372232  | 3.342298 | 0.598032 | 1 RAB30-AS1     | -      |
| ENSG00000155755 | -0.353657 | 4.844534 | 0.598236 | 1 TMEM237       | -      |
| ENSG00000185917 | -0.373835 | 3.680898 | 0.598263 | 1 SETD4         | K02927 |
| ENSG00000143878 | 0.345171  | 8.731363 | 0.598365 | 1 RHOB          | K07856 |
| ENSG00000131732 | -0.354147 | 5.182662 | 0.598397 | 1 ZCCHC9        | K17578 |
| ENSG00000246273 | -0.369159 | 3.93969  | 0.598406 | 1 SBF2-AS1      | -      |
| ENSG00000121879 | -0.350876 | 4.983894 | 0.598591 | 1 PIK3CA        | K00922 |
| ENSG00000134744 | 0.347967  | 6.214488 | 0.5987   | 1 ZCCHC11       | K13291 |
| ENSG00000133030 | 0.345261  | 7.970173 | 0.598739 | 1 MPRIP         | -      |
| ENSG00000124733 | -0.349291 | 5.767373 | 0.598761 | 1 MEA1          | K13980 |
| ENSG00000115761 | -0.354433 | 5.154662 | 0.598764 | 1 NOL10         | K14788 |
| ENSG00000091039 | -0.349135 | 5.832599 | 0.598771 | 1 OSBPL8        | -      |



|                 |           |          |          |                |        |
|-----------------|-----------|----------|----------|----------------|--------|
| ENSG00000127955 | -0.347045 | 6.646852 | 0.598851 | 1 GNAI1        | K04630 |
| ENSG00000150401 | 0.354611  | 4.878288 | 0.598865 | 1 DCUN1D2      | K17822 |
| ENSG00000248370 | -0.410814 | 2.179677 | 0.598935 | 1 RP11-366H4.1 | -      |
| ENSG00000182858 | 0.371157  | 3.710783 | 0.598964 | 1 ALG12        | K03847 |
| ENSG00000169020 | -0.352093 | 5.268093 | 0.599015 | 1 ATP5I        | K02129 |
| ENSG00000198265 | 0.354508  | 4.688645 | 0.599017 | 1 HELZ         | -      |
| ENSG00000188725 | -0.346633 | 6.759043 | 0.599051 | 1 SMIM15       | -      |
| ENSG00000006007 | 0.345634  | 7.254755 | 0.599078 | 1 GDE1         | K19179 |
| ENSG00000236088 | -0.386814 | 2.818384 | 0.599287 | 1 COX10-AS1    | -      |
| ENSG00000253669 | 0.38622   | 2.796521 | 0.599287 | 1 KB-1732A1.1  | -      |
| ENSG00000136933 | -0.349941 | 5.586011 | 0.599292 | 1 RABEPK       | -      |
| ENSG00000080819 | -0.351472 | 4.971387 | 0.599304 | 1 CPOX         | K00228 |
| ENSG00000106404 | -0.375843 | 3.60013  | 0.599312 | 1 CLDN15       | K06087 |
| ENSG00000125843 | 0.377264  | 3.243722 | 0.599327 | 1 AP5S1        | K19024 |
| ENSG00000113621 | -0.350089 | 5.472252 | 0.599418 | 1 TXNDC15      | -      |
| ENSG00000130254 | 0.346821  | 5.998579 | 0.599498 | 1 SAFB2        | -      |
| ENSG00000011105 | 0.354369  | 4.001547 | 0.599547 | 1 TSPAN9       | K17350 |
| ENSG00000139372 | -0.347163 | 6.247704 | 0.599596 | 1 TDG          | K03649 |
| ENSG00000033122 | -0.431048 | 1.767289 | 0.599598 | 1 LRRC7        | -      |
| ENSG00000092931 | -0.362539 | 3.766942 | 0.599625 | 1 MFSD11       | K12891 |
| ENSG00000093144 | -0.347376 | 6.207386 | 0.599735 | 1 ECHDC1       | K18426 |
| ENSG00000135503 | 0.356014  | 4.425986 | 0.599843 | 1 ACVR1B       | K13567 |
| ENSG00000149930 | 0.350316  | 5.322152 | 0.599911 | 1 TAOK2        | K04429 |
| ENSG00000099901 | -0.344198 | 8.029107 | 0.599925 | 1 RANBP1       | K15306 |
| ENSG00000171551 | 0.34346   | 9.166026 | 0.600002 | 1 ECEL1        | K09610 |
| ENSG00000006118 | -0.345431 | 6.874751 | 0.600096 | 1 TMEM132A     | K17599 |
| ENSG00000157895 | -0.358681 | 4.166302 | 0.600247 | 1 C12orf43     | -      |
| ENSG00000160055 | -0.378102 | 3.514569 | 0.600483 | 1 TMEM234      | K03246 |
| ENSG00000166997 | 0.35707   | 4.476172 | 0.600617 | 1 CNPY4        | -      |
| ENSG00000136463 | -0.347718 | 5.634417 | 0.600643 | 1 TACO1        | K18189 |
| ENSG00000123552 | -0.366855 | 3.842236 | 0.600841 | 1 USP45        | K11844 |
| ENSG00000157554 | 0.351871  | 4.49969  | 0.600985 | 1 ERG          | K09435 |
| ENSG00000146476 | -0.350994 | 5.490872 | 0.601015 | 1 C6orf211     | -      |
| ENSG00000065457 | -0.368262 | 3.377738 | 0.601038 | 1 ADAT1        | K15440 |
| ENSG00000182979 | 0.368209  | 3.359579 | 0.601038 | 1 MTA1         | K11660 |
| ENSG00000132406 | -0.360695 | 3.373376 | 0.601038 | 1 TMEM128      | -      |
| ENSG00000031691 | -0.347674 | 5.026159 | 0.601086 | 1 CENPQ        | K11509 |
| ENSG00000144401 | -0.355957 | 4.681749 | 0.601114 | 1 METTL21A     | -      |
| ENSG00000174106 | -0.352638 | 4.83689  | 0.601216 | 1 LEMD3        | K19410 |
| ENSG00000183010 | -0.343375 | 7.570669 | 0.601247 | 1 PYCR1        | K00286 |
| ENSG00000159403 | 0.34539   | 6.092975 | 0.60138  | 1 C1R          | K01330 |
| ENSG00000007384 | 0.351072  | 4.852687 | 0.601497 | 1 RHBDF1       | -      |
| ENSG00000112304 | -0.344793 | 6.488126 | 0.601592 | 1 ACOT13       | K17362 |
| ENSG00000105072 | -0.365207 | 3.610769 | 0.601862 | 1 C19orf44     | -      |
| ENSG00000174231 | 0.342069  | 8.287316 | 0.601895 | 1 PRPF8        | K12856 |
| ENSG00000110318 | -0.424592 | 1.937652 | 0.602008 | 1 KIAA1377     | -      |
| ENSG00000140465 | -0.424592 | 1.937652 | 0.602008 | 1 CYP1A1       | K07408 |
| ENSG00000171084 | -0.424592 | 1.937652 | 0.602008 | 1 FAM86JP      | K03842 |
| ENSG00000134897 | -0.350529 | 4.964388 | 0.602041 | 1 BIVM         | K10846 |
| ENSG00000147883 | 0.343237  | 6.927839 | 0.60209  | 1 CDKN2B       | K04685 |
| ENSG00000164022 | -0.344375 | 6.402209 | 0.602255 | 1 AIMP1        | K15437 |
| ENSG00000184489 | 0.402827  | 2.374003 | 0.602421 | 1 PTP4A3       | K18041 |
| ENSG00000063180 | 0.359404  | 4.076282 | 0.602421 | 1 CA11         | -      |
| ENSG00000075089 | -0.348357 | 5.34767  | 0.602439 | 1 ACTR6        | K11662 |
| ENSG00000139350 | -0.348357 | 5.34767  | 0.602439 | 1 NEDD1        | K16547 |
| ENSG00000183765 | -0.34321  | 6.863147 | 0.602466 | 1 CHEK2        | K06641 |
| ENSG00000014824 | -0.344645 | 6.144411 | 0.602511 | 1 SLC30A9      | K14696 |
| ENSG00000254101 | -0.373471 | 3.475627 | 0.602513 | 1 RP11-30J20.1 | -      |

|                 |           |          |          |                  |        |
|-----------------|-----------|----------|----------|------------------|--------|
| ENSG00000107796 | -0.379487 | 2.754593 | 0.602528 | 1 ACTA2          | K12313 |
| ENSG00000178537 | 0.372891  | 3.262223 | 0.602535 | 1 SLC25A20       | K15109 |
| ENSG00000166295 | -0.34316  | 6.771935 | 0.602695 | 1 ANAPC16        | K02927 |
| ENSG00000088682 | -0.344177 | 5.929186 | 0.602709 | 1 COQ9           | K18587 |
| ENSG00000114904 | -0.355665 | 4.345011 | 0.602763 | 1 NEK4           | K08857 |
| ENSG00000185697 | -0.343586 | 6.046453 | 0.602897 | 1 MYBL1          | K09421 |
| ENSG00000135317 | -0.345976 | 5.67355  | 0.602982 | 1 SNX14          | K17926 |
| ENSG00000187961 | -0.348992 | 4.969984 | 0.60304  | 1 KLHL17         | K10454 |
| ENSG00000170525 | 0.349707  | 5.240854 | 0.603289 | 1 PFKFB3         | K01103 |
| ENSG00000219201 | -0.3818   | 3.104919 | 0.603439 | 1 RP11-181C21.4  | -      |
| ENSG00000109320 | -0.351319 | 4.864206 | 0.603644 | 1 NFKB1          | K02580 |
| ENSG00000003400 | -0.486388 | 1.452725 | 0.603651 | 1 CASP10         | K04400 |
| ENSG00000162999 | -0.486388 | 1.452725 | 0.603651 | 1 DUSP19         | K14165 |
| ENSG00000160191 | 0.352823  | 4.51321  | 0.603714 | 1 PDE9A          | K13761 |
| ENSG00000123836 | -0.346095 | 5.501544 | 0.603786 | 1 PFKFB2         | K19029 |
| ENSG00000259865 | -0.39895  | 2.499749 | 0.603804 | 1 RP11-488L18.10 | -      |
| ENSG00000104472 | -0.342068 | 6.745249 | 0.603905 | 1 CHRAC1         | K11656 |
| ENSG00000100288 | -0.400678 | 2.078761 | 0.603961 | 1 CHKB           | K14156 |
| ENSG00000137218 | -0.400678 | 2.078761 | 0.603961 | 1 FRS3           | K12461 |
| ENSG00000163067 | -0.400678 | 2.078761 | 0.603961 | 1 ZNF2           | K09228 |
| ENSG00000143164 | 0.341948  | 6.594945 | 0.604062 | 1 DCAF6          | K11795 |
| ENSG00000013573 | -0.342951 | 6.210356 | 0.604188 | 1 DDX11          | K11273 |
| ENSG00000152683 | -0.343902 | 5.93564  | 0.604244 | 1 SLC30A6        | K14693 |
| ENSG00000074266 | 0.343262  | 6.285458 | 0.604379 | 1 EED            | K11462 |
| ENSG00000205213 | 0.340287  | 7.517241 | 0.604431 | 1 LGR4           | K04309 |
| ENSG00000165525 | -0.343484 | 5.800755 | 0.604596 | 1 NEMF           | -      |
| ENSG00000136044 | -0.356089 | 4.374874 | 0.604626 | 1 APPL2          | -      |
| ENSG00000120860 | -0.353879 | 3.820531 | 0.604656 | 1 CCDC53         | K18463 |
| ENSG00000173320 | 0.349195  | 4.493871 | 0.604769 | 1 STOX2          | -      |
| ENSG00000196305 | -0.339291 | 8.516153 | 0.604787 | 1 IARS           | K01870 |
| ENSG00000132155 | 0.341043  | 6.379195 | 0.6048   | 1 RAF1           | K04366 |
| ENSG00000132639 | -0.346248 | 5.306215 | 0.604824 | 1 SNAP25         | K18211 |
| ENSG00000127884 | -0.339625 | 7.950419 | 0.604842 | 1 ECHS1          | K07511 |
| ENSG00000088756 | 0.355773  | 3.656345 | 0.604929 | 1 ARHGAP28       | -      |
| ENSG00000005436 | -0.345814 | 5.121067 | 0.604971 | 1 GCFC2          | K09061 |
| ENSG00000260852 | 0.375489  | 3.210965 | 0.605003 | 1 FBXL19-AS1     | -      |
| ENSG00000177548 | -0.364619 | 3.231324 | 0.605003 | 1 RABEP2         | -      |
| ENSG00000143416 | 0.340823  | 6.659803 | 0.605125 | 1 SELENBP1       | K17285 |
| ENSG00000107890 | -0.354539 | 3.863311 | 0.605127 | 1 ANKRD26        | K17299 |
| ENSG00000187735 | -0.339143 | 8.006837 | 0.605306 | 1 TCEA1          | K03145 |
| ENSG00000126247 | -0.339464 | 7.61648  | 0.605344 | 1 CAPNS1         | K08583 |
| ENSG00000151806 | -0.352873 | 4.547721 | 0.60535  | 1 GUF1           | -      |
| ENSG00000111452 | 0.520629  | 0.655605 | 0.605363 | 1 GPR133         | K08465 |
| ENSG00000128203 | 0.520629  | 0.655605 | 0.605363 | 1 ASPHD2         | -      |
| ENSG00000154310 | 0.520629  | 0.655605 | 0.605363 | 1 TNIK           | K08840 |
| ENSG00000170049 | 0.520629  | 0.655605 | 0.605363 | 1 KCNAB3         | K04884 |
| ENSG00000213213 | 0.520629  | 0.655605 | 0.605363 | 1 CCDC183        | -      |
| ENSG00000225806 | 0.520629  | 0.655605 | 0.605363 | 1 RP1-309F20.3   | -      |
| ENSG00000257093 | 0.520629  | 0.655605 | 0.605363 | 1 KIAA1147       | -      |
| ENSG00000064763 | 0.450813  | 0.688218 | 0.605363 | 1 FAR2           | K13356 |
| ENSG00000106133 | 0.450813  | 0.688218 | 0.605363 | 1 NSUN5P2        | K15264 |
| ENSG00000263327 | 0.450813  | 0.688218 | 0.605363 | 1 TAPT1-AS1      | -      |
| ENSG00000070444 | 0.34712   | 5.005449 | 0.605438 | 1 MNT            | K09115 |
| ENSG00000102048 | -0.385636 | 2.982745 | 0.605456 | 1 ASB9           | K10331 |
| ENSG00000213782 | -0.385636 | 2.982745 | 0.605456 | 1 DDX47          | K14777 |
| ENSG00000240849 | 0.342263  | 5.742937 | 0.60557  | 1 TMEM189        | K10704 |
| ENSG00000124466 | 0.342219  | 6.263324 | 0.605641 | 1 LYPD3          | -      |
| ENSG00000104635 | 0.339166  | 7.485233 | 0.605657 | 1 SLC39A14       | K14720 |

|                 |           |          |          |                 |        |
|-----------------|-----------|----------|----------|-----------------|--------|
| ENSG00000136936 | -0.349732 | 4.067787 | 0.60567  | 1 XPA           | K10847 |
| ENSG00000134371 | -0.343254 | 5.664084 | 0.60577  | 1 CDC73         | K15175 |
| ENSG00000061794 | -0.339246 | 7.381715 | 0.605856 | 1 MRPS35        | K17413 |
| ENSG00000164292 | 0.339285  | 7.126995 | 0.605979 | 1 RHOBTB3       | K07869 |
| ENSG00000075223 | -0.342044 | 6.367105 | 0.606065 | 1 SEMA3C        | K06840 |
| ENSG00000254726 | -0.383712 | 2.694976 | 0.606068 | 1 MEX3A         | K15686 |
| ENSG00000152804 | -0.350176 | 4.249182 | 0.606083 | 1 HHEX          | K08024 |
| ENSG00000136213 | 0.348012  | 4.241028 | 0.606083 | 1 CHST12        | K04742 |
| ENSG00000257218 | -0.347812 | 4.819917 | 0.606183 | 1 GATC          | K02435 |
| ENSG00000196656 | 0.33938   | 6.441668 | 0.606221 | 1 AC004057.1    | K02976 |
| ENSG00000248049 | -0.444988 | 1.646466 | 0.606222 | 1 UBA6-AS1      | -      |
| ENSG00000183876 | -0.419072 | 1.630965 | 0.606222 | 1 ARSI          | K12375 |
| ENSG00000139343 | -0.340093 | 6.570613 | 0.606372 | 1 SNRPF         | K11098 |
| ENSG00000141098 | 0.351644  | 3.96268  | 0.606401 | 1 GFOD2         | -      |
| ENSG00000152332 | -0.339234 | 6.41357  | 0.606584 | 1 UHMK1         | K08877 |
| ENSG00000097046 | -0.343638 | 5.636181 | 0.606632 | 1 CDC7          | K02214 |
| ENSG00000164615 | 0.346887  | 5.044568 | 0.606772 | 1 CAMLG         | K17985 |
| ENSG00000125846 | -0.350177 | 4.006425 | 0.606785 | 1 ZNF133        | K09228 |
| ENSG00000101846 | 0.34542   | 4.961021 | 0.606795 | 1 STS           | K01131 |
| ENSG00000136159 | -0.340508 | 6.077914 | 0.606832 | 1 NUDT15        | K03574 |
| ENSG00000136628 | -0.337296 | 8.638336 | 0.60684  | 1 EPRS          | K14163 |
| ENSG00000197782 | 0.357256  | 3.617508 | 0.606871 | 1 ZNF780A       | K09228 |
| ENSG00000172586 | -0.341111 | 5.658895 | 0.606873 | 1 CHCHD1        | -      |
| ENSG00000068024 | 0.349819  | 4.678412 | 0.606886 | 1 HDAC4         | K11406 |
| ENSG00000133111 | -0.370849 | 3.398715 | 0.606922 | 1 RFXAP         | K08063 |
| ENSG00000225190 | 0.388949  | 2.287521 | 0.606931 | 1 PLEKHM1       | K11447 |
| ENSG00000146477 | 0.346139  | 4.452368 | 0.606969 | 1 SLC22A3       | K08200 |
| ENSG00000160785 | 0.343601  | 4.800085 | 0.607067 | 1 SLC25A44      | K15121 |
| ENSG00000120254 | -0.33853  | 7.011717 | 0.607165 | 1 MTHFD1L       | K13402 |
| ENSG00000131899 | 0.341977  | 5.56973  | 0.607167 | 1 LLGL1         | K06094 |
| ENSG00000165195 | -0.341601 | 5.246326 | 0.607209 | 1 PIGA          | K03857 |
| ENSG00000059769 | -0.346247 | 4.915878 | 0.607221 | 1 DNAJC25       | K19371 |
| ENSG00000167863 | -0.338432 | 7.037944 | 0.607226 | 1 ATP5H         | K02138 |
| ENSG00000168679 | 0.350948  | 3.857575 | 0.607237 | 1 SLC16A4       | K08181 |
| ENSG00000116906 | -0.33988  | 5.650202 | 0.607371 | 1 GNPAT         | K00649 |
| ENSG00000075407 | -0.347234 | 5.189868 | 0.607413 | 1 ZNF37A        | K09228 |
| ENSG00000233954 | 0.338803  | 6.492311 | 0.607614 | 1 RP11-169K16.7 | K00416 |
| ENSG00000176731 | -0.341102 | 5.940644 | 0.607691 | 1 C8orf59       | -      |
| ENSG00000025423 | 0.35899   | 3.704235 | 0.607785 | 1 HSD17B6       | K13369 |
| ENSG00000025156 | 0.343893  | 5.14357  | 0.607795 | 1 HSF2          | K09415 |
| ENSG00000113643 | -0.336962 | 7.790733 | 0.607823 | 1 RARS          | K01887 |
| ENSG00000205464 | 0.365914  | 2.828304 | 0.607844 | 1 ATP6AP1L      | -      |
| ENSG00000184557 | 0.340277  | 5.857969 | 0.607875 | 1 SOCS3         | K00995 |
| ENSG00000113369 | 0.34096   | 5.701333 | 0.607929 | 1 ARRDC3        | -      |
| ENSG00000124588 | -0.337924 | 6.902862 | 0.607999 | 1 NQO2          | K08071 |
| ENSG00000102978 | -0.340779 | 6.026445 | 0.60809  | 1 POLR2C        | K03011 |
| ENSG00000263731 | 0.437131  | 1.774551 | 0.608185 | 1 RP11-498C9.15 | -      |
| ENSG00000010278 | 0.336231  | 8.039213 | 0.608274 | 1 CD9           | K06460 |
| ENSG00000123684 | -0.338835 | 6.350576 | 0.608425 | 1 LPGAT1        | K13514 |
| ENSG00000138834 | 0.341172  | 5.444203 | 0.608519 | 1 MAPK8IP3      | K04436 |
| ENSG00000095485 | -0.34092  | 5.520747 | 0.608549 | 1 CWF19L1       | -      |
| ENSG00000163507 | -0.339358 | 6.077268 | 0.608583 | 1 KIAA1524      | -      |
| ENSG00000149476 | -0.339297 | 5.798401 | 0.608836 | 1 DAK           | K00863 |
| ENSG00000107929 | 0.337546  | 6.440652 | 0.608942 | 1 LARP4B        | K18763 |
| ENSG00000197548 | -0.343657 | 5.090543 | 0.608946 | 1 ATG7          | K08337 |
| ENSG00000125037 | 0.342074  | 5.175523 | 0.608958 | 1 EMC3          | K08857 |
| ENSG00000163728 | -0.340763 | 5.266943 | 0.608969 | 1 TTC14         | -      |
| ENSG00000164190 | 0.336312  | 7.246346 | 0.608979 | 1 NIPBL         | K06672 |

|                 |           |           |          |                 |        |
|-----------------|-----------|-----------|----------|-----------------|--------|
| ENSG00000182831 | 0.338214  | 6.168793  | 0.609046 | 1 C16orf72      | K11504 |
| ENSG00000101166 | -0.334877 | 9.026331  | 0.609234 | 1 SLMO2         | -      |
| ENSG00000100982 | 0.341871  | 5.117242  | 0.609245 | 1 PCIF1         | K17584 |
| ENSG00000064115 | -0.337241 | 6.623096  | 0.609282 | 1 TM7SF3        | -      |
| ENSG00000151500 | -0.348812 | 4.44688   | 0.609527 | 1 THYN1         | -      |
| ENSG00000224837 | -0.348275 | 4.290042  | 0.609564 | 1 GCSHP5        | K02437 |
| ENSG00000139629 | 0.336262  | 6.839286  | 0.609642 | 1 GALNT6        | K00710 |
| ENSG00000156453 | 0.338609  | 5.646268  | 0.609727 | 1 PCDH1         | K16498 |
| ENSG00000071889 | 0.370431  | 1.9348    | 0.609731 | 1 FAM3A         | -      |
| ENSG00000166598 | 0.333951  | 10.99198  | 0.609764 | 1 HSP90B1       | K09487 |
| ENSG00000111962 | 0.34266   | 5.089129  | 0.609849 | 1 UST           | K03193 |
| ENSG00000140365 | -0.338249 | 6.120709  | 0.609857 | 1 COMMD4        | -      |
| ENSG00000173226 | -0.337982 | 5.868283  | 0.609996 | 1 IQCB1         | K16774 |
| ENSG00000130844 | 0.343255  | 4.771428  | 0.610016 | 1 ZNF331        | K09228 |
| ENSG00000141013 | 0.349824  | 4.337568  | 0.610053 | 1 GAS8          | -      |
| ENSG00000142528 | 0.339129  | 4.922456  | 0.61027  | 1 ZNF473        | K09228 |
| ENSG00000172380 | -0.334267 | 8.273307  | 0.610295 | 1 GNG12         | K04347 |
| ENSG00000023839 | 0.33578   | 6.749061  | 0.610315 | 1 ABCC2         | K05666 |
| ENSG00000183828 | 0.358064  | 3.113349  | 0.610451 | 1 NUDT14        | K08077 |
| ENSG00000112651 | -0.337562 | 6.108704  | 0.610611 | 1 MRPL2         | K02886 |
| ENSG00000156374 | -0.341049 | 5.382724  | 0.610708 | 1 PCGF6         | K11470 |
| ENSG00000167363 | 0.372691  | 2.685479  | 0.610715 | 1 FN3K          | K15522 |
| ENSG00000206075 | 0.335621  | 6.535556  | 0.610904 | 1 SERPINB5      | K10139 |
| ENSG00000178821 | 0.403155  | 2.07487   | 0.610979 | 1 TMEM52        | -      |
| ENSG00000125434 | 0.349409  | 3.836237  | 0.611095 | 1 SLC25A35      | K15117 |
| ENSG00000169718 | -0.334448 | 7.258179  | 0.61113  | 1 DUS1L         | K05542 |
| ENSG00000083937 | -0.335478 | 6.238485  | 0.611235 | 1 CHMP2B        | K12192 |
| ENSG00000166897 | 0.340535  | 5.06178   | 0.611393 | 1 ELFN2         | K17568 |
| ENSG00000183298 | 0.355543  | 3.592281  | 0.611419 | 1 RP11-556K13.1 | K02998 |
| ENSG00000077942 | 0.33317   | 8.152977  | 0.611457 | 1 FBLN1         | K17307 |
| ENSG00000109445 | -0.338252 | 5.566744  | 0.611497 | 1 ZNF330        | -      |
| ENSG00000112305 | 0.351309  | 3.911083  | 0.611676 | 1 SMAP1         | K12486 |
| ENSG00000011198 | 0.344741  | 3.914077  | 0.611676 | 1 ABHD5         | K13699 |
| ENSG00000120709 | 0.334438  | 6.095523  | 0.611826 | 1 FAM53C        | K18710 |
| ENSG00000214021 | 0.35414   | 3.951343  | 0.611944 | 1 TTLL3         | K16608 |
| ENSG00000100519 | -0.334413 | 6.338194  | 0.611987 | 1 PSMC6         | K03064 |
| ENSG00000144810 | -0.39833  | 2.217495  | 0.612007 | 1 COL8A1        | -      |
| ENSG00000155465 | 0.70757   | -0.136336 | 0.612094 | 1 SLC7A7        | K13867 |
| ENSG00000198053 | 0.70757   | -0.136336 | 0.612094 | 1 SIRPA         | K06551 |
| ENSG00000205129 | 0.70757   | -0.136336 | 0.612094 | 1 C4orf47       | -      |
| ENSG00000214691 | 0.70757   | -0.136336 | 0.612094 | 1 AC104654.1    | -      |
| ENSG00000260853 | 0.70757   | -0.136336 | 0.612094 | 1 RP11-264B17.2 | -      |
| ENSG00000272003 | 0.70757   | -0.136336 | 0.612094 | 1 RP11-23P13.7  | -      |
| ENSG00000174912 | -0.630859 | -0.017436 | 0.612094 | 1 METTL15P1     | -      |
| ENSG00000188779 | -0.630859 | -0.017436 | 0.612094 | 1 SKOR1         | -      |
| ENSG00000227908 | -0.630859 | -0.017436 | 0.612094 | 1 CTD-2031P19.3 | -      |
| ENSG00000253919 | -0.630859 | -0.017436 | 0.612094 | 1 PRKRIRP7      | -      |
| ENSG00000256525 | -0.630859 | -0.017436 | 0.612094 | 1 POLG2         | K02333 |
| ENSG00000266010 | -0.630859 | -0.017436 | 0.612094 | 1 GATA6-AS1     | -      |
| ENSG00000268357 | -0.630859 | -0.017436 | 0.612094 | 1 VN1R81P       | -      |
| ENSG00000268707 | -0.630859 | -0.017436 | 0.612094 | 1 RP11-247A12.7 | -      |
| ENSG00000272155 | -0.630859 | -0.017436 | 0.612094 | 1 RP11-707M3.3  | -      |
| ENSG00000272720 | -0.630859 | -0.017436 | 0.612094 | 1 CTA-228A9.3   | -      |
| ENSG00000111863 | -0.53875  | -0.071453 | 0.612094 | 1 ADTRP         | -      |
| ENSG00000136286 | -0.53875  | -0.071453 | 0.612094 | 1 MYO1G         | K10356 |
| ENSG00000181798 | -0.53875  | -0.071453 | 0.612094 | 1 LINC00471     | -      |
| ENSG00000189229 | -0.53875  | -0.071453 | 0.612094 | 1 AC069277.2    | -      |
| ENSG00000250116 | -0.53875  | -0.071453 | 0.612094 | 1 RP11-417F21.1 | -      |

|                 |           |           |          |                  |        |
|-----------------|-----------|-----------|----------|------------------|--------|
| ENSG00000254756 | -0.53875  | -0.071453 | 0.612094 | 1 RP11-867G23.12 | -      |
| ENSG00000263563 | -0.53875  | -0.071453 | 0.612094 | 1 UBBP4          | K04551 |
| ENSG00000268001 | -0.53875  | -0.071453 | 0.612094 | 1 CTC-241F20.3   | -      |
| ENSG00000006451 | 0.334573  | 6.488877  | 0.61212  | 1 RALA           | K07834 |
| ENSG00000105732 | -0.344588 | 4.618918  | 0.612198 | 1 ZNF574         | -      |
| ENSG00000218175 | 0.342816  | 4.611754  | 0.612198 | 1 AC016739.2     | K02942 |
| ENSG00000123219 | -0.337827 | 5.487948  | 0.612204 | 1 CENPK          | K11503 |
| ENSG00000149084 | -0.341936 | 4.244501  | 0.612273 | 1 HSD17B12       | -      |
| ENSG00000114503 | -0.333677 | 7.00118   | 0.612349 | 1 NCBP2          | K12883 |
| ENSG00000261578 | -0.478282 | 1.280849  | 0.61235  | 1 RP11-21L23.2   | -      |
| ENSG00000265933 | -0.478282 | 1.280849  | 0.61235  | 1 LINC00668      | -      |
| ENSG00000167011 | 0.42924   | 1.241852  | 0.61235  | 1 NAT16          | -      |
| ENSG00000185561 | 0.42924   | 1.241852  | 0.61235  | 1 TLCD2          | -      |
| ENSG00000213862 | 0.42924   | 1.241852  | 0.61235  | 1 CTD-2270N23.1  | K02936 |
| ENSG00000260466 | 0.42924   | 1.241852  | 0.61235  | 1 RP4-536B24.2   | -      |
| ENSG00000042493 | 0.33208   | 8.280495  | 0.612539 | 1 CAPG           | K10368 |
| ENSG00000110442 | 0.335789  | 5.709746  | 0.612549 | 1 COMMD9         | -      |
| ENSG00000185262 | 0.334826  | 5.876771  | 0.612616 | 1 UBALD2         | -      |
| ENSG00000206562 | 0.351765  | 3.766948  | 0.612671 | 1 METTL6         | K00599 |
| ENSG00000157193 | -0.335909 | 5.671841  | 0.612849 | 1 LRP8           | -      |
| ENSG00000188266 | 0.380187  | 2.323288  | 0.612869 | 1 HYKK           | K18201 |
| ENSG00000205593 | 0.380187  | 2.323288  | 0.612869 | 1 DENND6B        | -      |
| ENSG00000106105 | -0.331651 | 8.623013  | 0.612874 | 1 GARS           | K01880 |
| ENSG00000165802 | -0.333485 | 6.768361  | 0.612978 | 1 NSMF           | -      |
| ENSG00000114026 | -0.349324 | 4.126644  | 0.61311  | 1 OGG1           | K03660 |
| ENSG00000138448 | -0.333185 | 6.857534  | 0.613127 | 1 ITGAV          | K06487 |
| ENSG00000117597 | -0.337223 | 5.075023  | 0.613213 | 1 DIEXF          | K14774 |
| ENSG00000179604 | 0.333078  | 6.663246  | 0.613355 | 1 CDC42EP4       | -      |
| ENSG00000240541 | 0.375177  | 2.416643  | 0.613601 | 1 TM4SF1-AS1     | -      |
| ENSG00000171813 | 0.33316   | 5.629505  | 0.613783 | 1 PWWP2B         | -      |
| ENSG00000071553 | 0.35233   | 3.606816  | 0.613898 | 1 ATP6AP1        | K03662 |
| ENSG00000118193 | -0.33494  | 5.655428  | 0.613917 | 1 KIF14          | K17915 |
| ENSG00000163840 | -0.33494  | 5.655428  | 0.613917 | 1 DTX3L          | K06058 |
| ENSG00000254670 | -0.433358 | 1.497479  | 0.614163 | 1 CTC-497E21.3   | -      |
| ENSG00000103199 | 0.343071  | 3.649556  | 0.614163 | 1 ZNF500         | K09229 |
| ENSG00000182749 | 0.381073  | 2.526958  | 0.61423  | 1 PAQR7          | K04613 |
| ENSG00000239521 | 0.381073  | 2.526958  | 0.61423  | 1 GATS           | K13055 |
| ENSG00000056661 | -0.345457 | 4.560728  | 0.614281 | 1 PCGF2          | K11460 |
| ENSG00000165175 | -0.332241 | 6.568334  | 0.614729 | 1 MID1IP1        | -      |
| ENSG00000189114 | 0.339277  | 4.645502  | 0.614787 | 1 BLOC1S3        | -      |
| ENSG00000110497 | 0.33834   | 5.216268  | 0.614899 | 1 AMBRA1         | K17985 |
| ENSG00000187446 | 0.330694  | 7.093899  | 0.615182 | 1 CHP1           | K17610 |
| ENSG00000126456 | -0.332192 | 6.316936  | 0.615203 | 1 IRF3           | K05411 |
| ENSG00000171425 | 0.339654  | 4.773049  | 0.615439 | 1 ZNF581         | -      |
| ENSG00000079156 | -0.361317 | 3.431414  | 0.615446 | 1 OSBPL6         | -      |
| ENSG00000185664 | 0.418543  | 1.642049  | 0.615458 | 1 PMEL           | K17304 |
| ENSG00000126945 | -0.400338 | 1.685868  | 0.615458 | 1 HNRNPH2        | K12898 |
| ENSG00000215644 | -0.400338 | 1.685868  | 0.615458 | 1 GCGR           | K04583 |
| ENSG00000234062 | -0.400338 | 1.685868  | 0.615458 | 1 RP11-308D16.4  | -      |
| ENSG00000101310 | -0.331957 | 6.449108  | 0.6155   | 1 SEC23B         | K14006 |
| ENSG00000197070 | -0.33614  | 5.194642  | 0.61557  | 1 ARRDC1         | -      |
| ENSG00000133704 | -0.331543 | 6.500796  | 0.61563  | 1 IPO8           | K10408 |
| ENSG00000118873 | -0.33225  | 5.99041   | 0.615692 | 1 RAB3GAP2       | -      |
| ENSG00000152465 | -0.365    | 2.890582  | 0.616059 | 1 NMT2           | K14523 |
| ENSG00000153982 | -0.365    | 2.890582  | 0.616059 | 1 GDPD1          | K11447 |
| ENSG00000198162 | -0.337786 | 5.150941  | 0.6162   | 1 MAN1A2         | K01230 |
| ENSG00000132002 | -0.329609 | 7.318426  | 0.616216 | 1 DNAJB1         | K09507 |
| ENSG00000100417 | 0.333133  | 5.403278  | 0.61652  | 1 PMM1           | K17497 |

|                 |           |          |          |               |         |
|-----------------|-----------|----------|----------|---------------|---------|
| ENSG00000182150 | -0.355469 | 3.670348 | 0.616537 | 1 ERCC6L2     | -       |
| ENSG00000113119 | -0.339441 | 4.144001 | 0.616552 | 1 TMCO6       | -       |
| ENSG00000168724 | -0.329292 | 7.273567 | 0.616617 | 1 DNAJC21     | K09506  |
| ENSG00000102786 | -0.330526 | 5.867544 | 0.616626 | 1 INTS6       | K13143  |
| ENSG00000083817 | -0.372462 | 3.026146 | 0.616703 | 1 ZNF416      | K09228  |
| ENSG00000118961 | -0.344184 | 3.710909 | 0.616716 | 1 C2orf43     | -       |
| ENSG00000146433 | -0.333305 | 5.634425 | 0.616795 | 1 TMEM181     | K13194  |
| ENSG00000153879 | -0.331066 | 6.44861  | 0.616866 | 1 CEBPG       | K10049  |
| ENSG00000091986 | -0.345204 | 3.757023 | 0.616885 | 1 CCDC80      | -       |
| ENSG00000162909 | -0.328475 | 7.723791 | 0.616955 | 1 CAPN2       | K03853  |
| ENSG00000166783 | 0.343306  | 4.284527 | 0.617144 | 1 KIAA0430    | K17573  |
| ENSG00000159176 | -0.328004 | 8.066426 | 0.61715  | 1 CSRP1       | K09377  |
| ENSG00000272933 | 0.385761  | 1.967986 | 0.617172 | 1 RP11-47A8.5 | -       |
| ENSG00000226121 | 0.360382  | 3.148353 | 0.61723  | 1 AHCTF1P1    | -       |
| ENSG00000164916 | 0.329453  | 6.157125 | 0.617284 | 1 FOXK1       | K09404  |
| ENSG00000122958 | -0.328535 | 7.367253 | 0.617302 | 1 VPS26A      | K18466  |
| ENSG00000187634 | 0.329544  | 6.469661 | 0.61753  | 1 SAMD11      | -       |
| ENSG00000135837 | 0.331406  | 5.519864 | 0.617635 | 1 CEP350      | K16768  |
| ENSG00000143028 | 0.362487  | 3.267003 | 0.61767  | 1 SYPL2       | -       |
| ENSG00000142669 | 0.334851  | 5.394951 | 0.617905 | 1 SH3BGR3     | -       |
| ENSG00000213516 | -0.33334  | 5.411814 | 0.617947 | 1 RBMXL1      | K12885  |
| ENSG00000100580 | -0.338135 | 4.530684 | 0.617958 | 1 TMED8       | K17985  |
| ENSG00000108107 | 0.326571  | 9.253444 | 0.617997 | 1 RPL28       | K02903  |
| ENSG00000169918 | 0.385933  | 2.223482 | 0.618242 | 1 OTUD7A      | K11860  |
| ENSG00000130158 | 0.336909  | 4.203482 | 0.618432 | 1 DOCK6       | -       |
| ENSG00000221944 | 0.336909  | 4.203482 | 0.618432 | 1 TIGD1       | K14284  |
| ENSG00000114956 | -0.328645 | 5.966106 | 0.61845  | 1 DGUOK       | K00904  |
| ENSG00000127989 | -0.337798 | 4.242154 | 0.618516 | 1 MTERF       | K15031  |
| ENSG00000176108 | -0.349867 | 3.585202 | 0.61864  | 1 CHMP6       | K12195  |
| ENSG00000124831 | 0.327456  | 7.007427 | 0.618777 | 1 LRRFIP1     | K17785  |
| ENSG00000164142 | 0.367481  | 2.449363 | 0.618968 | 1 FAM160A1    | -       |
| ENSG00000134824 | -0.331457 | 5.266933 | 0.619013 | 1 FADS2       | K10226  |
| ENSG00000089723 | 0.493915  | 0.354975 | 0.619281 | 1 OTUB2       | K09603  |
| ENSG00000225511 | 0.493915  | 0.354975 | 0.619281 | 1 LINC00475   | -       |
| ENSG00000231043 | 0.493915  | 0.354975 | 0.619281 | 1 AC007238.1  | K13109  |
| ENSG00000266405 | 0.493915  | 0.354975 | 0.619281 | 1 CBX3P2      | -       |
| ENSG00000197724 | -0.342597 | 3.884088 | 0.619375 | 1 PHF2        | K19414  |
| ENSG00000126756 | -0.330099 | 5.960488 | 0.619396 | 1 UXT         | -       |
| ENSG00000106018 | 0.369878  | 2.637071 | 0.61949  | 1 VIPR2       | K04590  |
| ENSG00000196739 | -0.334493 | 5.210102 | 0.619682 | 1 COL27A1     | K19721  |
| ENSG00000007372 | 0.339739  | 4.018057 | 0.619683 | 1 PAX6        | K08031  |
| ENSG00000206530 | -0.367726 | 2.74774  | 0.6197   | 1 WDR52       | -       |
| ENSG00000117791 | -0.334463 | 4.797994 | 0.619809 | 1             | 2-Mar - |
| ENSG00000168672 | -0.331947 | 5.28277  | 0.619823 | 1 FAM84B      | -       |
| ENSG00000198818 | -0.328965 | 5.311723 | 0.619876 | 1 SFT2D1      | -       |
| ENSG00000088356 | 0.328743  | 5.307827 | 0.619876 | 1 PDRG1       | -       |
| ENSG00000124120 | -0.341202 | 4.156352 | 0.619936 | 1 TTPAL       | K17985  |
| ENSG00000214655 | 0.329795  | 5.378155 | 0.62     | 1 ZSWIM8      | -       |
| ENSG00000187840 | -0.326397 | 7.076465 | 0.620012 | 1 EIF4EBP1    | K07205  |
| ENSG00000127452 | -0.338649 | 4.274207 | 0.620148 | 1 FBXL12      | K10278  |
| ENSG00000008300 | 0.360322  | 2.958262 | 0.620188 | 1 CELSR3      | K04602  |
| ENSG00000146416 | 0.360322  | 2.958262 | 0.620188 | 1 AIG1        | K16470  |
| ENSG00000148450 | -0.339462 | 4.305562 | 0.620196 | 1 MSRB2       | K07305  |
| ENSG00000152022 | -0.366178 | 3.047373 | 0.620316 | 1 LIX1L       | K16673  |
| ENSG00000103707 | -0.338037 | 4.440773 | 0.620408 | 1 MTFMT       | K00604  |
| ENSG00000158828 | 0.328491  | 5.634816 | 0.620413 | 1 PINK1       | K05688  |
| ENSG00000166451 | -0.328615 | 6.025797 | 0.620454 | 1 CENPN       | K11506  |
| ENSG00000109501 | 0.334186  | 4.582772 | 0.620617 | 1 WFS1        | K14020  |

|                 |           |          |          |                 |        |
|-----------------|-----------|----------|----------|-----------------|--------|
| ENSG0000068366  | -0.324968 | 7.815499 | 0.620629 | 1 ACSL4         | K01897 |
| ENSG00000160783 | -0.335156 | 4.654086 | 0.620707 | 1 PMF1          | K11546 |
| ENSG00000205758 | 0.331439  | 4.649046 | 0.620707 | 1 CRYZL1        | -      |
| ENSG00000163635 | 0.337333  | 4.671595 | 0.620735 | 1 ATXN7         | K11318 |
| ENSG00000170222 | 0.356479  | 3.333925 | 0.620795 | 1 ADPRM         | K01517 |
| ENSG00000179981 | -0.350181 | 3.347576 | 0.620795 | 1 TSHZ1         | K09236 |
| ENSG00000151014 | -0.351242 | 3.406651 | 0.620867 | 1 CCRN4L        | K18764 |
| ENSG00000173214 | 0.345194  | 3.385437 | 0.620867 | 1 KIAA1919      | K08175 |
| ENSG00000165644 | -0.329743 | 5.570437 | 0.620943 | 1 COMTD1        | -      |
| ENSG00000168438 | -0.333612 | 4.861135 | 0.620953 | 1 CDC40         | K12816 |
| ENSG00000179546 | -0.350511 | 3.49869  | 0.620996 | 1 HTR1D         | K04153 |
| ENSG00000087263 | -0.328096 | 6.135134 | 0.621032 | 1 OGFOD1        | -      |
| ENSG00000143842 | 0.328488  | 5.669747 | 0.621052 | 1 SOX13         | K09269 |
| ENSG00000111252 | -0.347445 | 3.773165 | 0.621285 | 1 SH2B3         | K12459 |
| ENSG00000139718 | 0.32709   | 5.212735 | 0.621303 | 1 SETD1B        | K11422 |
| ENSG00000140612 | 0.324248  | 7.766866 | 0.621326 | 1 SEC11A        | K13280 |
| ENSG00000136147 | -0.338309 | 3.854053 | 0.621359 | 1 PHF11         | K18494 |
| ENSG00000114993 | -0.339414 | 3.962021 | 0.621455 | 1 RTKN          | -      |
| ENSG00000139083 | 0.336747  | 4.058176 | 0.621537 | 1 ETV6          | K03211 |
| ENSG00000040275 | -0.324895 | 6.994707 | 0.621758 | 1 SPDL1         | -      |
| ENSG00000109929 | -0.336763 | 4.52117  | 0.621824 | 1 SC5D          | K00227 |
| ENSG00000213380 | -0.333349 | 4.519241 | 0.621824 | 1 COG8          | -      |
| ENSG00000111615 | -0.327231 | 6.031167 | 0.621837 | 1 KRR1          | K06961 |
| ENSG00000125827 | -0.335607 | 4.805849 | 0.621959 | 1 TMX4          | -      |
| ENSG00000165915 | -0.32935  | 4.865635 | 0.621983 | 1 SLC39A13      | K14719 |
| ENSG00000182952 | -0.324764 | 6.933689 | 0.622002 | 1 HMGN4         | -      |
| ENSG00000173581 | -0.542395 | 0.789026 | 0.622031 | 1 CCDC106       | -      |
| ENSG00000187667 | -0.542395 | 0.789026 | 0.622031 | 1 WHAMMP3       | -      |
| ENSG00000214654 | -0.542395 | 0.789026 | 0.622031 | 1 RP11-27I1.4   | K03766 |
| ENSG00000223559 | -0.542395 | 0.789026 | 0.622031 | 1 RP11-700P18.1 | K14288 |
| ENSG00000258727 | -0.542395 | 0.789026 | 0.622031 | 1 RP11-66N24.3  | -      |
| ENSG00000261204 | -0.542395 | 0.789026 | 0.622031 | 1 AC004449.6    | -      |
| ENSG00000132026 | 0.483196  | 0.764091 | 0.622031 | 1 RTBDN         | -      |
| ENSG00000188501 | 0.483196  | 0.764091 | 0.622031 | 1 LCTL          | K11447 |
| ENSG00000250451 | 0.483196  | 0.764091 | 0.622031 | 1 HOXC-AS1      | -      |
| ENSG00000123983 | -0.324177 | 7.282338 | 0.622092 | 1 ACSL3         | K01897 |
| ENSG00000087086 | 0.322498  | 9.988412 | 0.622195 | 1 FTL           | K13625 |
| ENSG00000242485 | -0.325622 | 6.084414 | 0.622304 | 1 MRPL20        | K02887 |
| ENSG00000111057 | -0.322016 | 11.77047 | 0.622525 | 1 KRT18         | K07604 |
| ENSG00000181458 | 0.323911  | 6.976355 | 0.622631 | 1 TMEM45A       | -      |
| ENSG00000197498 | -0.325529 | 6.027147 | 0.622755 | 1 RPF2          | K14847 |
| ENSG0000020426  | -0.327543 | 5.417971 | 0.622865 | 1 MNAT1         | K10842 |
| ENSG00000155111 | 0.329012  | 5.203226 | 0.622914 | 1 CDK19         | K02208 |
| ENSG00000116198 | 0.331499  | 4.444418 | 0.623149 | 1 CEP104        | K16458 |
| ENSG00000250846 | -0.467629 | 1.085253 | 0.623263 | 1 RP11-807H7.1  | -      |
| ENSG00000168938 | -0.336416 | 3.973189 | 0.623355 | 1 PPIC          | K09563 |
| ENSG00000124370 | 0.337278  | 3.773579 | 0.623449 | 1 MCEE          | K05606 |
| ENSG00000115128 | -0.323166 | 7.044659 | 0.623533 | 1 SF3B14        | K12833 |
| ENSG00000102967 | -0.346244 | 3.514046 | 0.623594 | 1 DHODH         | K00254 |
| ENSG00000102030 | 0.344663  | 3.502369 | 0.623594 | 1 NAA10         | K00670 |
| ENSG00000105767 | 0.341609  | 3.402204 | 0.623652 | 1 CADM4         | K06783 |
| ENSG00000158636 | 0.329233  | 5.237391 | 0.623698 | 1 C11orf30      | -      |
| ENSG00000160051 | -0.352079 | 3.308328 | 0.623716 | 1 IQCC          | K11447 |
| ENSG00000267002 | 0.451934  | 1.294551 | 0.623857 | 1 RP11-242D8.1  | -      |
| ENSG00000072818 | -0.418701 | 1.330999 | 0.623857 | 1 ACAP1         | K12489 |
| ENSG00000119004 | -0.418701 | 1.330999 | 0.623857 | 1 CYP20A1       | K07435 |
| ENSG00000229656 | -0.418701 | 1.330999 | 0.623857 | 1 RP11-462L8.1  | -      |
| ENSG00000256294 | -0.418701 | 1.330999 | 0.623857 | 1 ZNF225        | K09228 |

|                 |           |          |          |                 |        |
|-----------------|-----------|----------|----------|-----------------|--------|
| ENSG00000145335 | -0.358221 | 2.913876 | 0.623951 | 1 SNCA          | K04528 |
| ENSG00000136807 | 0.325636  | 6.113377 | 0.624041 | 1 CDK9          | K02211 |
| ENSG00000204947 | -0.412097 | 1.557559 | 0.624149 | 1 ZNF425        | K09228 |
| ENSG00000232434 | 0.37824   | 2.472846 | 0.624194 | 1 C9orf172      | K01112 |
| ENSG00000247400 | 0.371855  | 2.35818  | 0.624242 | 1 DNAJC3-AS1    | -      |
| ENSG00000162959 | 0.403685  | 1.697706 | 0.624286 | 1 MEMO1         | K06990 |
| ENSG00000198855 | 0.398175  | 2.250835 | 0.624287 | 1 FICD          | -      |
| ENSG00000205903 | 0.330782  | 4.617195 | 0.624297 | 1 ZNF316        | K09228 |
| ENSG00000243452 | 0.393857  | 1.839149 | 0.624339 | 1 NBPF15        | K10653 |
| ENSG00000258947 | 0.400393  | 2.000454 | 0.624344 | 1 TUBB3         | K07375 |
| ENSG00000232472 | -0.332953 | 4.5791   | 0.624352 | 1 EEF1B2P3      | K03232 |
| ENSG00000110321 | -0.320429 | 9.943166 | 0.624463 | 1 EIF4G2        | K03260 |
| ENSG00000163683 | 0.327284  | 5.151035 | 0.624611 | 1 SMIM14        | -      |
| ENSG00000168813 | -0.328538 | 5.087939 | 0.624703 | 1 ZNF507        | -      |
| ENSG00000143643 | -0.329455 | 5.022078 | 0.624805 | 1 TTC13         | -      |
| ENSG00000111641 | -0.321549 | 7.341327 | 0.624841 | 1 NOP2          | K14835 |
| ENSG00000084073 | -0.322049 | 6.950084 | 0.624892 | 1 ZMPSTE24      | K06013 |
| ENSG00000116750 | -0.321932 | 7.000887 | 0.624932 | 1 UCHL5         | K05610 |
| ENSG00000101152 | 0.321848  | 6.335207 | 0.624944 | 1 DNAJC5        | K09525 |
| ENSG00000104611 | -0.323921 | 6.412074 | 0.625174 | 1 SH2D4A        | K17577 |
| ENSG00000099385 | -0.326847 | 5.248615 | 0.62527  | 1 BCL7C         | -      |
| ENSG00000099330 | 0.328527  | 5.229219 | 0.625298 | 1 OCEL1         | -      |
| ENSG00000132463 | -0.320602 | 7.635418 | 0.625511 | 1 GRSF1         | -      |
| ENSG00000137338 | -0.339392 | 3.826538 | 0.625512 | 1 PGBD1         | K09230 |
| ENSG00000163611 | 0.331596  | 4.577278 | 0.625591 | 1 SPICE1        | K16490 |
| ENSG00000135637 | -0.338164 | 3.707475 | 0.625759 | 1 CCDC142       | K17434 |
| ENSG00000182768 | -0.32581  | 5.349804 | 0.62582  | 1 NGRN          | K13194 |
| ENSG00000272016 | -0.333586 | 4.410169 | 0.62597  | 1 RP11-215G15.5 | -      |
| ENSG00000159348 | 0.323499  | 5.530354 | 0.626081 | 1 CYB5R1        | K00326 |
| ENSG00000260916 | -0.324622 | 5.485017 | 0.626203 | 1 CCPG1         | K04613 |
| ENSG00000064309 | 0.33434   | 4.238819 | 0.626378 | 1 CDON          | -      |
| ENSG00000186716 | 0.321888  | 5.857943 | 0.626401 | 1 BCR           | K08878 |
| ENSG00000113732 | 0.320289  | 6.958794 | 0.626557 | 1 ATP6V0E1      | K02153 |
| ENSG00000162368 | -0.31948  | 7.709264 | 0.626644 | 1 CMPK1         | K13800 |
| ENSG00000129219 | 0.327885  | 4.631454 | 0.626692 | 1 PLD2          | K01115 |
| ENSG00000125814 | -0.345874 | 3.26326  | 0.626823 | 1 NAPB          | -      |
| ENSG00000107242 | 0.33937   | 3.244513 | 0.626823 | 1 PIP5K1B       | K00889 |
| ENSG00000168872 | -0.323878 | 5.448377 | 0.62698  | 1 DDX19A        | K18655 |
| ENSG00000100532 | -0.34444  | 3.197848 | 0.626985 | 1 CGRRF1        | -      |
| ENSG00000232838 | -0.351899 | 3.13452  | 0.627161 | 1 PET117        | K18188 |
| ENSG00000168209 | 0.318123  | 8.560231 | 0.627385 | 1 DDIT4         | K08270 |
| ENSG00000025770 | 0.322252  | 5.87151  | 0.62739  | 1 NCAPH2        | K11490 |
| ENSG00000105568 | 0.31834   | 8.140963 | 0.627401 | 1 PPP2R1A       | K03456 |
| ENSG00000100281 | -0.323896 | 5.313922 | 0.627409 | 1 HMGXB4        | K11298 |
| ENSG00000111361 | -0.320551 | 6.485763 | 0.627447 | 1 EIF2B1        | K03239 |
| ENSG00000188229 | -0.317912 | 8.927824 | 0.627501 | 1 TUBB4B        | K07375 |
| ENSG00000185278 | 0.338189  | 3.83022  | 0.627573 | 1 ZBTB37        | K10509 |
| ENSG00000204839 | 0.322229  | 5.792888 | 0.627659 | 1 MROH6         | -      |
| ENSG00000131467 | -0.318469 | 7.470411 | 0.628    | 1 PSME3         | K06698 |
| ENSG00000133678 | -0.350186 | 2.85425  | 0.628027 | 1 TMEM254       | -      |
| ENSG00000103365 | 0.321288  | 6.089701 | 0.628037 | 1 GGA2          | K12404 |
| ENSG00000135108 | 0.322189  | 5.666287 | 0.628125 | 1 FBXO21        | K10301 |
| ENSG00000104957 | -0.331594 | 4.569901 | 0.628136 | 1 CCDC130       | K13115 |
| ENSG00000162775 | 0.320854  | 5.464243 | 0.628283 | 1 RBM15         | K13190 |
| ENSG00000118689 | 0.320194  | 5.622383 | 0.6283   | 1 FOXO3         | K09408 |
| ENSG00000101343 | -0.327943 | 4.524928 | 0.628321 | 1 CRNKL1        | K12869 |
| ENSG00000182810 | -0.327943 | 4.524928 | 0.628321 | 1 DDX28         | K05543 |
| ENSG00000137203 | 0.317542  | 7.913034 | 0.628433 | 1 TFAP2A        | K09176 |



|                 |           |          |          |             |        |
|-----------------|-----------|----------|----------|-------------|--------|
| ENSG00000134014 | -0.322726 | 5.246304 | 0.628436 | 1 ELP3      | K07739 |
| ENSG00000116171 | -0.319821 | 6.29483  | 0.628466 | 1 SCP2      | K08764 |
| ENSG00000041802 | -0.321511 | 5.971712 | 0.62851  | 1 LSG1      | K14539 |
| ENSG00000178980 | -0.323626 | 5.519795 | 0.628735 | 1 SEPW1     | -      |
| ENSG00000174891 | -0.323999 | 4.710327 | 0.628773 | 1 RSRC1     | -      |
| ENSG00000139233 | -0.319778 | 5.780212 | 0.628811 | 1 LLPH      | K17985 |
| ENSG00000118900 | 0.319307  | 6.27975  | 0.628906 | 1 UBN1      | K17492 |
| ENSG00000182685 | 0.366862  | 2.586995 | 0.62892  | 1 BRICD5    | -      |
| ENSG00000113407 | -0.316336 | 9.559028 | 0.628983 | 1 TARS      | K01868 |
| ENSG00000101882 | -0.323622 | 5.457375 | 0.629007 | 1 NKAP      | -      |
| ENSG00000117450 | 0.316194  | 9.961135 | 0.629012 | 1 PRDX1     | K13279 |
| ENSG00000033030 | -0.322472 | 5.29285  | 0.629016 | 1 ZCCHC8    | K13128 |
| ENSG00000140564 | 0.318583  | 6.56363  | 0.629104 | 1 FURIN     | K01349 |
| ENSG00000152455 | -0.320936 | 5.234718 | 0.629281 | 1 SUV39H2   | K11419 |
| ENSG00000234743 | -0.361555 | 2.513961 | 0.629284 | 1 EIF5AP4   | K03263 |
| ENSG00000116478 | 0.317165  | 7.399531 | 0.629337 | 1 HDAC1     | K06067 |
| ENSG00000113456 | -0.317589 | 7.100953 | 0.629454 | 1 RAD1      | K02830 |
| ENSG00000103260 | -0.318108 | 6.757938 | 0.629492 | 1 METRN     | K09228 |
| ENSG00000117151 | -0.324987 | 5.007164 | 0.629493 | 1 CTBS      | K12310 |
| ENSG00000090470 | -0.32083  | 5.460362 | 0.629678 | 1 PDCD7     | -      |
| ENSG00000108262 | 0.317794  | 6.633417 | 0.629815 | 1 GIT1      | K05737 |
| ENSG00000105726 | 0.31833   | 6.396957 | 0.629843 | 1 ATP13A1   | K14950 |
| ENSG00000167792 | -0.317376 | 6.889712 | 0.630036 | 1 NDUFV1    | K03942 |
| ENSG00000170832 | 0.321246  | 5.378159 | 0.630074 | 1 USP32     | K11837 |
| ENSG00000157426 | -0.340565 | 3.724182 | 0.630212 | 1 AASDH     | K00142 |
| ENSG00000156170 | -0.325801 | 4.648812 | 0.630231 | 1 NDUFAF6   | K18163 |
| ENSG00000105855 | -0.321136 | 5.342264 | 0.630289 | 1 ITGB8     | K06591 |
| ENSG00000152291 | 0.315919  | 7.755079 | 0.630323 | 1 TGOLN2    | K08857 |
| ENSG00000100129 | 0.315312  | 8.48388  | 0.630468 | 1 EIF3L     | K15029 |
| ENSG00000135829 | -0.315795 | 7.862781 | 0.630479 | 1 DHX9      | K13184 |
| ENSG00000187193 | -0.336555 | 4.03596  | 0.630584 | 1 MT1X      | K14739 |
| ENSG00000133318 | 0.315737  | 7.541134 | 0.630727 | 1 RTN3      | -      |
| ENSG00000173726 | 0.315126  | 8.361557 | 0.630738 | 1 TOMM20    | K17770 |
| ENSG00000128595 | 0.31483   | 9.038756 | 0.630741 | 1 CALU      | -      |
| ENSG00000138777 | -0.318935 | 5.998677 | 0.630754 | 1 PPA2      | K01507 |
| ENSG00000179523 | -0.354173 | 3.088921 | 0.630776 | 1 EIF3J-AS1 | -      |
| ENSG00000137177 | 0.316749  | 6.701671 | 0.630814 | 1 KIF13A    | K17914 |
| ENSG00000172167 | -0.321001 | 4.921592 | 0.630905 | 1 MTBP      | -      |
| ENSG00000076706 | 0.314877  | 8.431156 | 0.630968 | 1 MCAM      | K06534 |
| ENSG00000242616 | -0.325275 | 4.718673 | 0.63101  | 1 GNG10     | K04545 |
| ENSG00000184428 | -0.318785 | 5.954165 | 0.63101  | 1 TOP1MT    | K03163 |
| ENSG00000104164 | -0.318135 | 6.103662 | 0.631056 | 1 BLOC1S6   | -      |
| ENSG00000143420 | -0.315498 | 7.531584 | 0.631139 | 1 ENSA      | -      |
| ENSG00000153006 | -0.319555 | 5.543463 | 0.631223 | 1 SREK1IP1  | -      |
| ENSG00000171155 | -0.319555 | 5.543463 | 0.631223 | 1 C1GALT1C1 | K09653 |
| ENSG00000163535 | -0.320212 | 5.301757 | 0.631261 | 1 SGOL2     | K11581 |
| ENSG00000146556 | -0.36229  | 2.056151 | 0.631262 | 1 WASH2P    | K18461 |
| ENSG00000136478 | 0.319549  | 5.113483 | 0.631577 | 1 TEX2      | -      |
| ENSG00000095739 | -0.326191 | 4.405993 | 0.631613 | 1 BAMBI     | K10162 |
| ENSG00000162769 | -0.326191 | 4.405993 | 0.631613 | 1 FLVCR1    | K08220 |
| ENSG00000136878 | 0.32317   | 4.403563 | 0.631613 | 1 USP20     | K11848 |
| ENSG00000102921 | -0.322513 | 4.961502 | 0.63164  | 1 N4BP1     | -      |
| ENSG00000123685 | -0.382262 | 1.912552 | 0.631943 | 1 BATF3     | K09034 |
| ENSG00000214653 | -0.382262 | 1.912552 | 0.631943 | 1 HNRNPA3P3 | K12741 |
| ENSG00000187156 | 0.381743  | 1.887776 | 0.631943 | 1 LINC00221 | -      |
| ENSG00000189319 | -0.324037 | 4.540046 | 0.632125 | 1 FAM53B    | -      |
| ENSG00000135940 | -0.314648 | 7.461513 | 0.632142 | 1 COX5B     | K02265 |
| ENSG00000162642 | -0.317166 | 5.91406  | 0.632259 | 1 Clorf52   | -      |

|                 |           |           |          |                 |        |
|-----------------|-----------|-----------|----------|-----------------|--------|
| ENSG00000120137 | -0.317476 | 6.24432   | 0.63226  | 1 PANK3         | K09680 |
| ENSG00000165527 | -0.31727  | 6.016379  | 0.632527 | 1 ARF6          | K07941 |
| ENSG00000137992 | -0.319739 | 5.432238  | 0.632601 | 1 DBT           | K09699 |
| ENSG00000259230 | -0.407267 | 1.753118  | 0.63273  | 1 CTD-2555C10.3 | -      |
| ENSG00000137364 | -0.316421 | 6.052459  | 0.632736 | 1 TPMT          | K00569 |
| ENSG00000078808 | 0.314133  | 7.279134  | 0.632762 | 1 SDF4          | -      |
| ENSG00000114796 | 0.324064  | 4.785904  | 0.632776 | 1 KLHL24        | K10461 |
| ENSG00000172534 | 0.34172   | 2.699991  | 0.632987 | 1 HCFC1         | K14966 |
| ENSG00000085998 | -0.315362 | 6.357069  | 0.633006 | 1 POMGNT1       | K09666 |
| ENSG00000089159 | 0.314373  | 6.891556  | 0.633054 | 1 PXN           | K05760 |
| ENSG00000074276 | 0.759385  | -0.698071 | 0.63315  | 1 CDHR2         | K16502 |
| ENSG00000145965 | 0.759385  | -0.698071 | 0.63315  | 1 C6ORF50       | -      |
| ENSG00000157315 | 0.759385  | -0.698071 | 0.63315  | 1 TMED6         | -      |
| ENSG00000162641 | 0.759385  | -0.698071 | 0.63315  | 1 AKNAD1        | -      |
| ENSG00000166682 | 0.759385  | -0.698071 | 0.63315  | 1 TMPRSS5       | K09636 |
| ENSG00000168484 | 0.759385  | -0.698071 | 0.63315  | 1 SFTPC         | -      |
| ENSG00000177236 | 0.759385  | -0.698071 | 0.63315  | 1 AP006621.1    | -      |
| ENSG00000179761 | 0.759385  | -0.698071 | 0.63315  | 1 PIPOX         | K00306 |
| ENSG00000180767 | 0.759385  | -0.698071 | 0.63315  | 1 CHST13        | K07779 |
| ENSG00000183607 | 0.759385  | -0.698071 | 0.63315  | 1 GKN2          | -      |
| ENSG00000185130 | 0.759385  | -0.698071 | 0.63315  | 1 HIST1H2BL     | K11252 |
| ENSG00000188152 | 0.759385  | -0.698071 | 0.63315  | 1 NUTM2G        | -      |
| ENSG00000196622 | 0.759385  | -0.698071 | 0.63315  | 1 RIMBP3        | K04552 |
| ENSG00000221949 | 0.759385  | -0.698071 | 0.63315  | 1 C12orf61      | -      |
| ENSG00000223653 | 0.759385  | -0.698071 | 0.63315  | 1 RP11-131L23.1 | -      |
| ENSG00000227536 | 0.759385  | -0.698071 | 0.63315  | 1 SOCS5P4       | K04698 |
| ENSG00000231234 | 0.759385  | -0.698071 | 0.63315  | 1 SKP1P1        | K03094 |
| ENSG00000231652 | 0.759385  | -0.698071 | 0.63315  | 1 RP11-553A21.3 | -      |
| ENSG00000236204 | 0.759385  | -0.698071 | 0.63315  | 1 AC092594.1    | -      |
| ENSG00000243708 | 0.759385  | -0.698071 | 0.63315  | 1 PLA2G4B       | K16342 |
| ENSG00000246339 | 0.759385  | -0.698071 | 0.63315  | 1 EXTL3-AS1     | -      |
| ENSG00000248027 | 0.759385  | -0.698071 | 0.63315  | 1 CTD-2383M3.1  | -      |
| ENSG00000248554 | 0.759385  | -0.698071 | 0.63315  | 1 RP11-159F24.6 | -      |
| ENSG00000259031 | 0.759385  | -0.698071 | 0.63315  | 1 CTD-2062F14.3 | -      |
| ENSG00000259366 | 0.759385  | -0.698071 | 0.63315  | 1 CTD-2647L4.4  | -      |
| ENSG00000259826 | 0.759385  | -0.698071 | 0.63315  | 1 RP11-467D6.1  | -      |
| ENSG00000260176 | 0.759385  | -0.698071 | 0.63315  | 1 CTD-3126B10.4 | -      |
| ENSG00000262484 | 0.759385  | -0.698071 | 0.63315  | 1 CCER2         | -      |
| ENSG00000267053 | 0.759385  | -0.698071 | 0.63315  | 1 CTD-3162L10.1 | -      |
| ENSG00000267419 | 0.759385  | -0.698071 | 0.63315  | 1 CTC-559E9.6   | -      |
| ENSG00000270640 | 0.759385  | -0.698071 | 0.63315  | 1 RP11-373D23.2 | -      |
| ENSG00000273374 | 0.759385  | -0.698071 | 0.63315  | 1 RP11-383I23.2 | -      |
| ENSG00000004478 | -0.312645 | 8.668388  | 0.633331 | 1 FKBP4         | K09571 |
| ENSG00000166033 | 0.314628  | 6.29212   | 0.633471 | 1 HTRA1         | K08784 |
| ENSG00000196865 | -0.323133 | 4.686708  | 0.633539 | 1 NHLRC2        | K12581 |
| ENSG00000166716 | 0.317179  | 5.072312  | 0.633625 | 1 ZNF592        | K19325 |
| ENSG00000244560 | -0.43949  | 1.573925  | 0.633648 | 1 RP4-800G7.2   | K09228 |
| ENSG00000236624 | 0.415866  | 1.540924  | 0.633648 | 1 CCDC163P      | -      |
| ENSG00000156136 | -0.322257 | 5.060628  | 0.633753 | 1 DCK           | K00893 |
| ENSG00000166266 | -0.318091 | 4.933099  | 0.633787 | 1 CUL5          | K10612 |
| ENSG00000153944 | 0.314145  | 6.300501  | 0.633788 | 1 MSI2          | K15696 |
| ENSG00000118939 | -0.325233 | 4.307667  | 0.633791 | 1 UCHL3         | K05609 |
| ENSG00000107938 | 0.317919  | 4.910889  | 0.633931 | 1 EDRF1         | K09228 |
| ENSG00000140264 | 0.312002  | 8.615888  | 0.63399  | 1 SERF2         | -      |
| ENSG00000110958 | -0.311742 | 9.071283  | 0.634129 | 1 PTGES3        | K15730 |
| ENSG00000167625 | 0.324122  | 4.440427  | 0.634137 | 1 ZNF526        | K17985 |
| ENSG00000086544 | 0.330088  | 3.776882  | 0.634235 | 1 ITPKC         | K00911 |
| ENSG00000186834 | 0.312913  | 7.071137  | 0.634362 | 1 HEXIM1        | K15189 |

|                 |           |          |          |                 |        |
|-----------------|-----------|----------|----------|-----------------|--------|
| ENSG00000100644 | 0.312042  | 7.933989 | 0.634375 | 1 HIF1A         | K08268 |
| ENSG00000100242 | 0.315575  | 6.092266 | 0.634653 | 1 SUN2          | K19347 |
| ENSG00000177058 | -0.328484 | 3.981447 | 0.634664 | 1 SLC38A9       | K14995 |
| ENSG00000135926 | 0.314657  | 5.977761 | 0.634694 | 1 TMBIM1        | K06890 |
| ENSG00000167306 | 0.31749   | 5.043305 | 0.634766 | 1 MYO5B         | K10357 |
| ENSG00000114127 | -0.320482 | 4.669588 | 0.63485  | 1 XRN1          | K12618 |
| ENSG00000092094 | -0.33212  | 3.704032 | 0.634913 | 1 OSGEP         | K01409 |
| ENSG00000119042 | -0.350898 | 2.434591 | 0.634991 | 1 SATB2         | -      |
| ENSG00000198498 | -0.319385 | 5.212446 | 0.635064 | 1 TMA16         | K14860 |
| ENSG00000143549 | -0.31083  | 9.154255 | 0.635088 | 1 TPM3          | K09290 |
| ENSG00000110888 | -0.316466 | 5.289489 | 0.635191 | 1 CAPRN2        | K18744 |
| ENSG00000103274 | 0.317879  | 5.095616 | 0.635202 | 1 NUBP1         | -      |
| ENSG00000132330 | -0.345326 | 2.959378 | 0.635222 | 1 SCLY          | K01763 |
| ENSG00000155636 | -0.335478 | 3.610317 | 0.635673 | 1 RBM45         | -      |
| ENSG00000272047 | -0.325636 | 4.424465 | 0.635696 | 1 GTF2H5        | K10845 |
| ENSG00000253251 | 0.36824   | 2.29727  | 0.635841 | 1 CTC-534A2.2   | -      |
| ENSG00000171723 | 0.347825  | 2.306945 | 0.635841 | 1 GPHN          | K15376 |
| ENSG00000092108 | -0.315219 | 5.65631  | 0.635941 | 1 SCFD1         | -      |
| ENSG00000111752 | -0.436973 | 1.164565 | 0.635966 | 1 PHC1          | K11456 |
| ENSG00000248161 | -0.436973 | 1.164565 | 0.635966 | 1 RP11-499E18.1 | -      |
| ENSG00000105672 | 0.426679  | 1.107284 | 0.635966 | 1 ETV2          | K09432 |
| ENSG00000271976 | -0.399661 | 1.142328 | 0.635966 | 1 RP11-884K10.7 | -      |
| ENSG00000100814 | 0.314381  | 5.88865  | 0.635979 | 1 CCNB1IP1      | K12581 |
| ENSG00000149823 | 0.315973  | 5.361167 | 0.63601  | 1 VPS51         | K04257 |
| ENSG00000163608 | -0.313661 | 5.861556 | 0.636247 | 1 C3orf17       | K12756 |
| ENSG00000145220 | -0.314558 | 5.851729 | 0.636339 | 1 LYAR          | K15263 |
| ENSG00000184634 | 0.318474  | 4.861892 | 0.636378 | 1 MED12         | K15162 |
| ENSG00000099991 | 0.313602  | 5.779348 | 0.63649  | 1 CABIN1        | K17613 |
| ENSG00000103995 | -0.312848 | 6.215156 | 0.636521 | 1 CEP152        | K16728 |
| ENSG00000223749 | -0.345904 | 2.823477 | 0.636526 | 1 MIR503HG      | -      |
| ENSG00000151006 | 0.33436   | 2.798009 | 0.636526 | 1 PRSS53        | -      |
| ENSG00000213337 | 0.327299  | 3.510388 | 0.636533 | 1 ANKRD39       | -      |
| ENSG00000158470 | -0.31368  | 6.068867 | 0.636674 | 1 B4GALT5       | K09905 |
| ENSG00000130449 | 0.317766  | 4.717474 | 0.636694 | 1 ZSWIM6        | -      |
| ENSG00000140280 | -0.326912 | 4.318697 | 0.636706 | 1 LYSMD2        | -      |
| ENSG00000101844 | 0.319684  | 4.311499 | 0.636706 | 1 ATG4A         | K08342 |
| ENSG00000248275 | -0.381087 | 2.207336 | 0.636814 | 1 TRIM52-AS1    | -      |
| ENSG00000177917 | -0.319688 | 4.700234 | 0.636903 | 1 ARL6IP6       | -      |
| ENSG00000197841 | -0.333624 | 3.471004 | 0.637007 | 1 ZNF181        | K09228 |
| ENSG00000067057 | 0.309603  | 7.7073   | 0.637219 | 1 PFKP          | K00850 |
| ENSG00000089091 | -0.498563 | 0.885656 | 0.63737  | 1 DZANK1        | K10408 |
| ENSG00000135477 | -0.498563 | 0.885656 | 0.63737  | 1 KRT121P       | K07605 |
| ENSG00000198150 | -0.498563 | 0.885656 | 0.63737  | 1 AC135178.1    | K17985 |
| ENSG00000260804 | -0.498563 | 0.885656 | 0.63737  | 1 RP11-566E18.3 | -      |
| ENSG00000061455 | -0.453003 | 0.858272 | 0.63737  | 1 PRDM6         | -      |
| ENSG00000106089 | -0.453003 | 0.858272 | 0.63737  | 1 STX1A         | K04560 |
| ENSG00000111817 | -0.453003 | 0.858272 | 0.63737  | 1 DSE           | K01794 |
| ENSG00000134245 | -0.453003 | 0.858272 | 0.63737  | 1 WNT2B         | K00182 |
| ENSG00000143036 | -0.453003 | 0.858272 | 0.63737  | 1 SLC44A3       | K15282 |
| ENSG00000213385 | -0.453003 | 0.858272 | 0.63737  | 1 RP11-577H5.1  | K02936 |
| ENSG00000241361 | -0.453003 | 0.858272 | 0.63737  | 1 SLC25A24P1    | K14684 |
| ENSG00000242715 | -0.453003 | 0.858272 | 0.63737  | 1 CCDC169       | -      |
| ENSG00000267244 | -0.453003 | 0.858272 | 0.63737  | 1 CTB-31O20.4   | -      |
| ENSG00000143575 | -0.310177 | 7.15668  | 0.637398 | 1 HAX1          | K16220 |
| ENSG00000213860 | 0.315995  | 5.437131 | 0.637419 | 1 RPL21P75      | K02889 |
| ENSG00000110851 | -0.313543 | 5.505406 | 0.637423 | 1 PRDM4         | K12463 |
| ENSG00000060688 | -0.310683 | 6.744551 | 0.637553 | 1 SNRNP40       | K12857 |
| ENSG00000242086 | 0.323876  | 3.869973 | 0.637561 | 1 LINC00969     | -      |

|                 |           |          |          |                  |        |
|-----------------|-----------|----------|----------|------------------|--------|
| ENSG00000123992 | -0.313813 | 4.950188 | 0.637564 | 1 DNPEP          | K01267 |
| ENSG00000135847 | -0.313052 | 5.720842 | 0.637656 | 1 ACBD6          | -      |
| ENSG00000143971 | -0.311479 | 5.605946 | 0.637667 | 1 ETAA1          | -      |
| ENSG00000162236 | 0.315115  | 5.187666 | 0.637716 | 1 STX5           | K08490 |
| ENSG00000134597 | -0.317138 | 4.611629 | 0.637806 | 1 RBMX2          | K13107 |
| ENSG00000005194 | -0.311242 | 6.320287 | 0.637824 | 1 CIAPIN1        | -      |
| ENSG00000171262 | -0.311423 | 6.20629  | 0.63785  | 1 FAM98B         | K15434 |
| ENSG00000186174 | 0.312708  | 5.741266 | 0.637978 | 1 BCL9L          | -      |
| ENSG00000107789 | -0.312589 | 5.509258 | 0.63806  | 1 MINPP1         | K03103 |
| ENSG00000167595 | -0.341123 | 3.05736  | 0.63811  | 1 C19orf55       | -      |
| ENSG00000125629 | 0.321992  | 4.678544 | 0.638242 | 1 INSIG2         | -      |
| ENSG00000126803 | 0.320407  | 3.792934 | 0.638377 | 1 HSPA2          | K03283 |
| ENSG00000155393 | -0.321317 | 3.96463  | 0.638669 | 1 HEATR3         | -      |
| ENSG00000224020 | -0.541479 | 0.504309 | 0.638759 | 1 MIR181A2HG     | -      |
| ENSG00000227268 | -0.541479 | 0.504309 | 0.638759 | 1 KLLN           | K17985 |
| ENSG00000148357 | 0.531978  | 0.44934  | 0.638759 | 1 HMCN2          | K17341 |
| ENSG00000163009 | 0.531978  | 0.44934  | 0.638759 | 1 C2orf48        | K11447 |
| ENSG00000241528 | 0.531978  | 0.44934  | 0.638759 | 1 RP1-130H16.16  | -      |
| ENSG00000249485 | 0.531978  | 0.44934  | 0.638759 | 1 RBBP4P1        | K10752 |
| ENSG00000272518 | 0.531978  | 0.44934  | 0.638759 | 1 RP11-26J3.3    | -      |
| ENSG00000083067 | 0.450301  | 0.487269 | 0.638759 | 1 TRPM3          | K04978 |
| ENSG00000122477 | 0.450301  | 0.487269 | 0.638759 | 1 LRRC39         | -      |
| ENSG00000128917 | 0.450301  | 0.487269 | 0.638759 | 1 DLL4           | K06051 |
| ENSG00000269439 | 0.450301  | 0.487269 | 0.638759 | 1 CTD-3131K8.2   | -      |
| ENSG00000158805 | -0.317707 | 4.838297 | 0.638779 | 1 ZNF276         | -      |
| ENSG00000102753 | -0.309941 | 6.532434 | 0.638806 | 1 KPNA3          | -      |
| ENSG00000205808 | 0.334825  | 2.970155 | 0.638836 | 1 PPAPDC2        | -      |
| ENSG00000197712 | 0.311426  | 5.840406 | 0.639058 | 1 FAM114A1       | -      |
| ENSG00000125445 | -0.309525 | 6.62186  | 0.63906  | 1 MRPS7          | K02992 |
| ENSG00000213214 | -0.366458 | 2.552048 | 0.639076 | 1 ARHGEF35       | -      |
| ENSG00000242028 | 0.346378  | 2.543254 | 0.639076 | 1 HYPK           | -      |
| ENSG00000100296 | -0.31041  | 5.923482 | 0.639166 | 1 THOC5          | K13174 |
| ENSG00000168393 | -0.309687 | 5.96193  | 0.639216 | 1 DTYMK          | K00943 |
| ENSG00000174446 | -0.312327 | 5.68213  | 0.639239 | 1 SNAPC5         | K15211 |
| ENSG00000132294 | -0.309112 | 6.027179 | 0.639408 | 1 EFR3A          | -      |
| ENSG00000072163 | 0.31718   | 4.771534 | 0.639463 | 1 LIMS2          | -      |
| ENSG00000144827 | -0.309883 | 6.018421 | 0.639509 | 1 ABHD10         | K13702 |
| ENSG00000163832 | -0.319783 | 4.571679 | 0.639512 | 1 ELP6           | -      |
| ENSG00000120733 | 0.308467  | 6.195335 | 0.639592 | 1 KDM3B          | K15601 |
| ENSG00000136827 | -0.31062  | 5.946388 | 0.639894 | 1 TOR1A          | -      |
| ENSG00000119878 | -0.317267 | 4.736821 | 0.639952 | 1 CRIPT          | -      |
| ENSG00000132434 | -0.335784 | 3.19288  | 0.639955 | 1 LANCL2         | -      |
| ENSG00000167508 | -0.312229 | 5.898    | 0.639975 | 1 MVD            | K01597 |
| ENSG00000143756 | 0.309547  | 6.157077 | 0.640055 | 1 FBXO28         | K10306 |
| ENSG00000181577 | -0.31349  | 4.904123 | 0.640077 | 1 C6orf223       | -      |
| ENSG00000175455 | -0.307889 | 6.254706 | 0.64012  | 1 CCDC14         | K16541 |
| ENSG00000166147 | 0.306858  | 7.785608 | 0.640136 | 1 FBN1           | K06825 |
| ENSG00000105135 | 0.31064   | 5.876735 | 0.640204 | 1 ILVBL          | K11259 |
| ENSG00000177225 | 0.313371  | 5.184049 | 0.640258 | 1 PDDC1          | -      |
| ENSG00000163956 | 0.308175  | 6.603434 | 0.640294 | 1 LRPAP1         | -      |
| ENSG00000085760 | -0.309355 | 5.909708 | 0.640342 | 1 MTIF2          | K02519 |
| ENSG00000104133 | -0.312984 | 5.357294 | 0.640524 | 1 SPG11          | K19026 |
| ENSG00000171316 | 0.311655  | 5.80628  | 0.640545 | 1 CHD7           | K14437 |
| ENSG00000166164 | -0.310287 | 5.929961 | 0.640588 | 1 BRD7           | K08047 |
| ENSG00000100097 | 0.305712  | 8.912046 | 0.640706 | 1 LGALS1         | K06830 |
| ENSG00000223361 | 0.389952  | 1.751272 | 0.640815 | 1 FTH1P10        | K00522 |
| ENSG00000272654 | 0.389952  | 1.751272 | 0.640815 | 1 RP11-422P24.11 | -      |
| ENSG00000125388 | 0.359686  | 1.765755 | 0.640815 | 1 GRK4           | K08291 |

|                 |           |          |          |                 |        |
|-----------------|-----------|----------|----------|-----------------|--------|
| ENSG00000174672 | 0.359686  | 1.765755 | 0.640815 | 1 BRSK2         | K08796 |
| ENSG00000181513 | 0.328846  | 3.578077 | 0.640867 | 1 ACBD4         | K02927 |
| ENSG00000214114 | -0.310969 | 5.547216 | 0.6409   | 1 MYCBP         | -      |
| ENSG00000169228 | 0.322885  | 4.074044 | 0.640965 | 1 RAB24         | K07912 |
| ENSG00000158402 | 0.315138  | 4.444526 | 0.641006 | 1 CDC25C        | K05867 |
| ENSG00000021574 | -0.311421 | 5.124774 | 0.641043 | 1 SPAST         | K13254 |
| ENSG00000111266 | 0.308005  | 5.850331 | 0.641058 | 1 DUSP16        | K04459 |
| ENSG00000182180 | -0.307006 | 6.987899 | 0.641108 | 1 MRPS16        | K02959 |
| ENSG00000122565 | -0.305393 | 8.634672 | 0.641243 | 1 CBX3          | K11586 |
| ENSG00000250479 | -0.307798 | 6.456184 | 0.64131  | 1 CHCHD10       | -      |
| ENSG00000198668 | -0.30614  | 7.488142 | 0.641353 | 1 CALM1         | K02183 |
| ENSG00000215246 | -0.325149 | 3.730586 | 0.641437 | 1 RP11-43F13.3  | -      |
| ENSG00000135631 | 0.307599  | 5.810976 | 0.641569 | 1 RAB11FIP5     | K12484 |
| ENSG00000112877 | 0.309507  | 5.5332   | 0.641672 | 1 CEP72         | K16532 |
| ENSG00000150907 | -0.313681 | 4.764465 | 0.641817 | 1 FOXO1         | K07201 |
| ENSG00000128513 | -0.31193  | 5.36156  | 0.641922 | 1 POT1          | K11109 |
| ENSG00000069849 | 0.304659  | 8.589408 | 0.642    | 1 ATP1B3        | K01540 |
| ENSG00000158290 | -0.306771 | 6.618308 | 0.64206  | 1 CUL4B         | K10609 |
| ENSG00000114491 | -0.307906 | 5.878785 | 0.642281 | 1 UMPS          | K13421 |
| ENSG00000095794 | -0.313818 | 4.454667 | 0.64231  | 1 CREM          | K09052 |
| ENSG00000146085 | -0.314666 | 5.02608  | 0.642359 | 1 MUT           | K01847 |
| ENSG00000110435 | -0.305917 | 6.896758 | 0.64245  | 1 PDHX          | K13997 |
| ENSG00000173457 | -0.308864 | 5.784998 | 0.642491 | 1 PPP1R14B      | K17555 |
| ENSG00000198431 | 0.303947  | 9.105989 | 0.642561 | 1 TXNRD1        | K00384 |
| ENSG00000168237 | -0.346613 | 2.673387 | 0.64257  | 1 GLYCTK        | K15788 |
| ENSG00000139291 | -0.316242 | 4.428477 | 0.642663 | 1 TMEM19        | K17985 |
| ENSG00000130714 | -0.392681 | 1.615273 | 0.642691 | 1 POMT1         | K00728 |
| ENSG00000174173 | -0.305639 | 6.82827  | 0.642876 | 1 TRMT10C       | K17654 |
| ENSG00000069248 | -0.3062   | 6.38566  | 0.642958 | 1 NUP133        | K14300 |
| ENSG00000050393 | -0.30643  | 6.371448 | 0.64315  | 1 MCUR1         | K12606 |
| ENSG00000112378 | 0.303417  | 8.932311 | 0.643205 | 1 PERP          | K10136 |
| ENSG00000126351 | 0.309159  | 5.462254 | 0.643328 | 1 THRA          | K05547 |
| ENSG00000171132 | -0.330783 | 2.92477  | 0.643347 | 1 PRKCE         | K18050 |
| ENSG00000137074 | -0.306409 | 6.043876 | 0.64335  | 1 APTX          | K10863 |
| ENSG00000111880 | -0.314999 | 4.560559 | 0.643435 | 1 RNGTT         | K13917 |
| ENSG00000263244 | 0.308942  | 5.352599 | 0.643506 | 1 RP11-473I1.10 | -      |
| ENSG00000130348 | -0.308327 | 5.45338  | 0.643511 | 1 QRSL1         | K02433 |
| ENSG00000054282 | -0.321761 | 3.743683 | 0.643563 | 1 SDCCAG8       | K16488 |
| ENSG00000152402 | -0.344431 | 2.573628 | 0.643788 | 1 GUCY1A2       | K12318 |
| ENSG00000179965 | -0.344431 | 2.573628 | 0.643788 | 1 ZNF771        | K11504 |
| ENSG00000254967 | -0.344431 | 2.573628 | 0.643788 | 1 RP11-680F20.6 | -      |
| ENSG00000182307 | -0.303853 | 7.524048 | 0.643806 | 1 C8orf33       | -      |
| ENSG00000189376 | -0.321157 | 3.871911 | 0.643852 | 1 C8orf76       | -      |
| ENSG00000026297 | -0.315747 | 3.86885  | 0.643852 | 1 RNASET2       | K01166 |
| ENSG00000261824 | -0.315747 | 3.86885  | 0.643852 | 1 LINC00662     | -      |
| ENSG00000146677 | -0.320514 | 3.551493 | 0.643879 | 1 AC004453.8    | K02912 |
| ENSG00000102078 | -0.328472 | 3.143959 | 0.643889 | 1 SLC25A14      | K15106 |
| ENSG00000116691 | -0.30898  | 5.467306 | 0.643973 | 1 MIIP          | -      |
| ENSG00000147894 | -0.315669 | 3.986845 | 0.644095 | 1 C9orf72       | -      |
| ENSG00000088833 | 0.307373  | 5.544535 | 0.644127 | 1 NSFL1C        | K14012 |
| ENSG00000126070 | -0.310795 | 4.515283 | 0.644139 | 1 AGO3          | K11593 |
| ENSG0000018610  | -0.308226 | 4.901177 | 0.644153 | 1 CXorf56       | -      |
| ENSG00000140350 | -0.302884 | 7.923454 | 0.644467 | 1 ANP32A        | K18646 |
| ENSG00000154719 | -0.307321 | 5.562126 | 0.644553 | 1 MRPL39        | K17420 |
| ENSG00000116001 | -0.304797 | 6.218709 | 0.644638 | 1 TIA1          | K13201 |
| ENSG00000025708 | -0.303751 | 6.908845 | 0.644789 | 1 TYMP          | K00758 |
| ENSG00000220842 | 0.30413   | 6.15275  | 0.644801 | 1 RP11-572P18.1 | K02889 |
| ENSG00000122034 | -0.3043   | 6.594496 | 0.644801 | 1 GTF3A         | K09191 |

|                 |           |          |          |                |        |
|-----------------|-----------|----------|----------|----------------|--------|
| ENSG0000067829  | 0.33654   | 3.067503 | 0.644831 | 1 IDH3G        | K00030 |
| ENSG00000147852 | 0.307078  | 5.204449 | 0.64493  | 1 VLDLR        | -      |
| ENSG00000254505 | -0.426477 | 1.41668  | 0.644988 | 1 CHMP4A       | K12194 |
| ENSG00000254761 | 0.390911  | 1.384366 | 0.644988 | 1 RP11-672A2.1 | -      |
| ENSG00000137996 | -0.304572 | 6.268415 | 0.64508  | 1 RTCA         | K01974 |
| ENSG00000116670 | 0.304911  | 6.406785 | 0.645133 | 1 MAD2L2       | K13728 |
| ENSG00000092203 | 0.307993  | 5.561373 | 0.645155 | 1 TOX4         | -      |
| ENSG00000163785 | -0.304135 | 6.429006 | 0.645158 | 1 RYK          | K05128 |
| ENSG00000048471 | 0.349142  | 2.458014 | 0.645163 | 1 SNX29        | K17935 |
| ENSG00000168890 | 0.349142  | 2.458014 | 0.645163 | 1 TMEM150A     | -      |
| ENSG00000102763 | -0.305605 | 5.33359  | 0.645325 | 1 VWA8         | -      |
| ENSG00000136813 | -0.302826 | 7.187084 | 0.645359 | 1 KIAA0368     | K11886 |
| ENSG00000101337 | 0.303672  | 6.48486  | 0.645438 | 1 TM9SF4       | K17086 |
| ENSG00000152056 | -0.328999 | 3.606626 | 0.645526 | 1 AP1S3        | K12395 |
| ENSG00000072422 | -0.308658 | 4.716936 | 0.645927 | 1 RHOBTB1      | K07868 |
| ENSG00000166289 | 0.307125  | 5.191288 | 0.645941 | 1 PLEKHF1      | -      |
| ENSG00000089818 | -0.308936 | 4.783655 | 0.645971 | 1 NECAP1       | -      |
| ENSG00000130723 | 0.301576  | 7.674312 | 0.646003 | 1 PRRC2B       | -      |
| ENSG00000069011 | 0.302424  | 6.891507 | 0.646047 | 1 PITX1        | K09356 |
| ENSG00000075702 | 0.304275  | 5.733024 | 0.646055 | 1 WDR62        | K11447 |
| ENSG00000160445 | 0.308025  | 4.962535 | 0.646081 | 1 ZER1         | K10350 |
| ENSG00000155324 | -0.303159 | 6.143888 | 0.646255 | 1 GRAMD3       | -      |
| ENSG00000089639 | 0.326567  | 3.552156 | 0.646264 | 1 GMIP         | -      |
| ENSG00000115685 | -0.304126 | 5.366872 | 0.646274 | 1 PPP1R7       | K17550 |
| ENSG00000130175 | 0.300766  | 8.53015  | 0.646287 | 1 PRKCSH       | K08288 |
| ENSG00000158220 | 0.34404   | 1.947441 | 0.646292 | 1 ESYT3        | K12581 |
| ENSG00000162670 | 0.34404   | 1.947441 | 0.646292 | 1 BRINP3       | -      |
| ENSG00000008130 | 0.302565  | 6.543471 | 0.646524 | 1 NADK         | K00858 |
| ENSG00000107560 | -0.315959 | 4.27176  | 0.646542 | 1 RAB11FIP2    | K12484 |
| ENSG00000145354 | -0.304498 | 5.835729 | 0.646605 | 1 CISD2        | -      |
| ENSG00000242247 | 0.302592  | 6.485346 | 0.646616 | 1 ARFGAP3      | K12493 |
| ENSG00000135916 | 0.307577  | 4.804945 | 0.646658 | 1 ITM2C        | K18265 |
| ENSG00000156414 | 0.305705  | 5.381332 | 0.646733 | 1 TDRD9        | K18408 |
| ENSG00000198961 | 0.302218  | 6.550515 | 0.646889 | 1 PJA2         | K10634 |
| ENSG00000181915 | -0.304894 | 5.610438 | 0.646947 | 1 ADO          | K10712 |
| ENSG00000103335 | 0.300173  | 8.470358 | 0.646968 | 1 PIEZO1       | -      |
| ENSG00000139197 | 0.301604  | 6.863114 | 0.646989 | 1 PEX5         | K13342 |
| ENSG00000143919 | 0.331471  | 2.930524 | 0.646989 | 1 CAMKMT       | K18826 |
| ENSG00000183475 | -0.314593 | 4.239645 | 0.64703  | 1 ASB7         | K10329 |
| ENSG00000196670 | -0.314581 | 4.141292 | 0.647035 | 1 ZFP62        | K09228 |
| ENSG00000131697 | 0.313096  | 3.502907 | 0.647052 | 1 NPHP4        | K16478 |
| ENSG00000138347 | 0.300723  | 7.374261 | 0.647248 | 1 MYPN         | K08834 |
| ENSG00000116539 | 0.307974  | 5.199676 | 0.647481 | 1 ASH1L        | K06101 |
| ENSG00000138071 | -0.299764 | 8.468101 | 0.64749  | 1 ACTR2        | K17260 |
| ENSG00000187741 | 0.304108  | 5.4126   | 0.64762  | 1 FANCA        | K10888 |
| ENSG00000180573 | 0.310636  | 4.870951 | 0.647631 | 1 HIST1H2AC    | K11251 |
| ENSG00000179598 | -0.318122 | 3.883796 | 0.64768  | 1 PLD6         | K16862 |
| ENSG00000088812 | 0.307539  | 5.08144  | 0.647809 | 1 ATRN         | -      |
| ENSG00000171604 | 0.300828  | 5.968648 | 0.647835 | 1 CXXC5        | -      |
| ENSG00000225373 | 0.451738  | 1.164874 | 0.647858 | 1 WASH5P       | K18461 |
| ENSG00000259772 | 0.451738  | 1.164874 | 0.647858 | 1 RP11-16E12.2 | -      |
| ENSG00000268218 | 0.451738  | 1.164874 | 0.647858 | 1 AC137932.1   | K17985 |
| ENSG00000242114 | 0.322364  | 3.455524 | 0.647894 | 1 MTFP1        | K17981 |
| ENSG00000011376 | -0.307434 | 5.221849 | 0.647979 | 1 LARS2        | K01869 |
| ENSG00000163382 | -0.300629 | 6.921919 | 0.648176 | 1 APOA1BP      | K17759 |
| ENSG00000166908 | 0.307023  | 4.952645 | 0.648197 | 1 PIP4K2C      | K00920 |
| ENSG00000142731 | -0.305957 | 4.958642 | 0.648197 | 1 PLK4         | K08863 |
| ENSG00000085644 | 0.324162  | 2.847866 | 0.648233 | 1 ZNF213       | K09229 |

|                 |           |          |          |               |        |
|-----------------|-----------|----------|----------|---------------|--------|
| ENSG00000143436 | -0.300996 | 6.660933 | 0.648266 | 1 MRPL9       | K02939 |
| ENSG00000144848 | -0.301048 | 6.592693 | 0.648353 | 1 ATG3        | K08343 |
| ENSG00000187837 | 0.303241  | 5.525592 | 0.648384 | 1 HIST1H1C    | K11275 |
| ENSG00000101945 | 0.364293  | 2.233701 | 0.648527 | 1 SUV39H1     | K11419 |
| ENSG00000145075 | 0.37722   | 1.802899 | 0.648562 | 1 CCDC39      | -      |
| ENSG00000172171 | -0.315012 | 4.482373 | 0.648697 | 1 TEFM        | K17658 |
| ENSG00000101447 | 0.300513  | 6.564961 | 0.648722 | 1 FAM83D      | K16805 |
| ENSG00000152422 | -0.306542 | 4.75311  | 0.648744 | 1 XRCC4       | K10886 |
| ENSG00000104356 | -0.302935 | 5.450377 | 0.649115 | 1 POP1        | K01164 |
| ENSG00000130177 | -0.300122 | 6.701057 | 0.649139 | 1 CDC16       | K03353 |
| ENSG00000241553 | -0.300266 | 5.898019 | 0.649154 | 1 ARPC4       | K05755 |
| ENSG00000168490 | 0.311905  | 3.663943 | 0.649247 | 1 PHYHIP      | -      |
| ENSG00000172456 | -0.327489 | 3.025077 | 0.649275 | 1 FGGY        | -      |
| ENSG00000111802 | -0.301863 | 6.317571 | 0.649291 | 1 TDP2        | K19619 |
| ENSG00000105426 | 0.299547  | 6.788791 | 0.649362 | 1 PTPRS       | K06778 |
| ENSG00000251022 | -0.299945 | 6.683695 | 0.649368 | 1 THAP9-AS1   | -      |
| ENSG00000198042 | -0.306234 | 5.093035 | 0.649463 | 1 MAK16       | K14831 |
| ENSG00000198937 | 0.314864  | 3.885018 | 0.649564 | 1 CCDC167     | -      |
| ENSG00000183579 | 0.312457  | 4.17967  | 0.649607 | 1 ZNRF3       | K16273 |
| ENSG00000168038 | -0.329859 | 2.785354 | 0.649611 | 1 ULK4        | K17545 |
| ENSG00000169598 | -0.329859 | 2.785354 | 0.649611 | 1 DFFB        | K02311 |
| ENSG00000131238 | -0.298392 | 7.666687 | 0.649625 | 1 PPT1        | K01074 |
| ENSG00000171475 | 0.301826  | 5.258228 | 0.649673 | 1 WIPF2       | K19475 |
| ENSG00000123427 | 0.317529  | 3.351977 | 0.649763 | 1 METTL21B    | K04460 |
| ENSG00000140320 | 0.301841  | 5.543593 | 0.649981 | 1 BAHD1       | -      |
| ENSG00000263753 | -0.318471 | 3.97578  | 0.650021 | 1 LINC00667   | -      |
| ENSG00000180806 | 0.3162    | 3.968698 | 0.650021 | 1 HOXC9       | K09294 |
| ENSG00000166582 | -0.300858 | 6.055786 | 0.650057 | 1 CENPV       | -      |
| ENSG00000168758 | 0.301814  | 5.055277 | 0.650088 | 1 SEMA4C      | K06521 |
| ENSG00000141622 | 0.338043  | 3.158713 | 0.650114 | 1 RNF165      | K17821 |
| ENSG00000109046 | 0.29887   | 6.743193 | 0.650183 | 1 WSB1        | K10341 |
| ENSG00000104856 | -0.311995 | 4.541859 | 0.650241 | 1 RELB        | K09253 |
| ENSG00000174233 | 0.298873  | 6.017594 | 0.650283 | 1 ADCY6       | K08046 |
| ENSG00000126821 | 0.298783  | 5.717245 | 0.65035  | 1 SGPP1       | K04716 |
| ENSG00000130005 | -0.299415 | 6.44016  | 0.650484 | 1 GAMT        | K00542 |
| ENSG00000181450 | -0.33507  | 2.953471 | 0.65056  | 1 ZNF678      | K09228 |
| ENSG00000214389 | -0.30115  | 5.296177 | 0.650569 | 1 RPS3AP26    | K02984 |
| ENSG00000155367 | -0.357155 | 2.148089 | 0.650615 | 1 PPM1J       | K17504 |
| ENSG00000154309 | -0.307861 | 4.376643 | 0.650635 | 1 DISP1       | -      |
| ENSG00000183780 | -0.313017 | 3.580972 | 0.650944 | 1 SLC35F3     | K15288 |
| ENSG00000111269 | 0.297667  | 6.112044 | 0.651162 | 1 CREBL2      | -      |
| ENSG00000137804 | 0.29665   | 7.866819 | 0.651234 | 1 NUSAP1      | -      |
| ENSG00000157483 | 0.296829  | 7.576904 | 0.651298 | 1 MYO1E       | K10356 |
| ENSG00000102890 | -0.374879 | 1.670799 | 0.651311 | 1 ELMO3       | K19241 |
| ENSG00000146094 | -0.374879 | 1.670799 | 0.651311 | 1 DOK3        | -      |
| ENSG00000070404 | 0.295869  | 9.382116 | 0.651327 | 1 FSTL3       | K09171 |
| ENSG00000109654 | -0.310973 | 4.093299 | 0.651436 | 1 TRIM2       | K11997 |
| ENSG00000111785 | -0.306768 | 4.54746  | 0.651437 | 1 RIC8B       | -      |
| ENSG00000148843 | -0.297832 | 6.77411  | 0.651502 | 1 PDCD11      | K14792 |
| ENSG00000161860 | 0.451198  | 0.864912 | 0.651531 | 1 SYCE2       | K19535 |
| ENSG00000224424 | 0.451198  | 0.864912 | 0.651531 | 1 PRKAR2A-AS1 | -      |
| ENSG00000232859 | 0.451198  | 0.864912 | 0.651531 | 1 LYRM9       | -      |
| ENSG00000164989 | -0.418086 | 0.950703 | 0.651531 | 1 CCDC171     | -      |
| ENSG00000239523 | -0.418086 | 0.950703 | 0.651531 | 1 MYLK-AS1    | -      |
| ENSG00000166924 | 0.392706  | 0.892827 | 0.651531 | 1 NYAP1       | -      |
| ENSG00000185924 | 0.392706  | 0.892827 | 0.651531 | 1 RTN4RL1     | K16660 |
| ENSG00000196110 | 0.392706  | 0.892827 | 0.651531 | 1 ZNF699      | K09228 |
| ENSG00000196208 | 0.392706  | 0.892827 | 0.651531 | 1 GREB1       | -      |

|                 |           |          |          |                 |        |
|-----------------|-----------|----------|----------|-----------------|--------|
| ENSG00000214331 | 0.392706  | 0.892827 | 0.651531 | 1 RP11-252A24.2 | K17509 |
| ENSG00000244932 | 0.392706  | 0.892827 | 0.651531 | 1 RP11-529F4.1  | K19656 |
| ENSG00000267161 | 0.392706  | 0.892827 | 0.651531 | 1 AC005943.5    | -      |
| ENSG00000110756 | -0.301541 | 5.554692 | 0.651775 | 1 HPS5          | -      |
| ENSG00000173011 | -0.310671 | 3.984025 | 0.651784 | 1 TADA2B        | K15127 |
| ENSG00000169925 | 0.30387   | 4.969572 | 0.651786 | 1 BRD3          | K11721 |
| ENSG00000128159 | 0.302986  | 4.760294 | 0.651845 | 1 TUBGCP6       | K16573 |
| ENSG00000114933 | -0.317537 | 3.532633 | 0.651876 | 1 INO80D        | K11668 |
| ENSG00000075188 | -0.298762 | 6.283127 | 0.651907 | 1 NUP37         | K14302 |
| ENSG00000119661 | -0.320952 | 3.248992 | 0.65193  | 1 DNAL1         | K10411 |
| ENSG00000196152 | 0.332949  | 2.376617 | 0.651939 | 1 ZNF79         | K09228 |
| ENSG00000111602 | -0.29782  | 6.547067 | 0.651982 | 1 TIMELESS      | K03155 |
| ENSG00000165501 | -0.299972 | 5.223012 | 0.652024 | 1 LRR1          | K10348 |
| ENSG00000180488 | -0.30562  | 4.810426 | 0.652031 | 1 FAM73A        | K17985 |
| ENSG00000173598 | -0.303341 | 5.050049 | 0.652104 | 1 NUDT4         | K07766 |
| ENSG00000176597 | -0.308575 | 4.442597 | 0.652207 | 1 B3GNT5        | -      |
| ENSG00000197062 | -0.305232 | 4.296409 | 0.652289 | 1 RP5-874C20.3  | K09230 |
| ENSG00000156026 | 0.297186  | 6.588414 | 0.652316 | 1 MCU           | -      |
| ENSG00000118454 | 0.298302  | 6.177824 | 0.652411 | 1 ANKRD13C      | -      |
| ENSG00000163626 | -0.321908 | 3.046334 | 0.652626 | 1 COX18         | K17797 |
| ENSG00000104859 | 0.29795   | 5.377116 | 0.652631 | 1 CLASRP        | K13168 |
| ENSG00000138413 | -0.295762 | 7.466814 | 0.652729 | 1 IDH1          | K00031 |
| ENSG00000133398 | -0.297051 | 6.582232 | 0.652747 | 1 MED10         | K15151 |
| ENSG00000165685 | -0.30188  | 4.877511 | 0.652763 | 1 TMEM52B       | -      |
| ENSG00000070961 | -0.29579  | 7.412065 | 0.652764 | 1 ATP2B1        | K05850 |
| ENSG00000135722 | 0.350216  | 2.594815 | 0.652863 | 1 FBXL8         | K10274 |
| ENSG00000273131 | 0.350216  | 2.594815 | 0.652863 | 1 RP6-42F4.1    | -      |
| ENSG00000127507 | 0.319205  | 3.471493 | 0.652871 | 1 EMR2          | K08443 |
| ENSG00000160293 | 0.299374  | 5.70467  | 0.652915 | 1 VAV2          | K05730 |
| ENSG00000180035 | -0.313915 | 3.826217 | 0.65299  | 1 ZNF48         | K09228 |
| ENSG00000143776 | -0.300207 | 5.290592 | 0.652996 | 1 CDC42BPA      | K16307 |
| ENSG00000128951 | -0.295422 | 7.555626 | 0.653002 | 1 DUT           | K01520 |
| ENSG00000063978 | 0.296552  | 6.40676  | 0.653053 | 1 RNF4          | -      |
| ENSG00000115318 | -0.375164 | 2.013778 | 0.653067 | 1 LOXL3         | K00280 |
| ENSG00000133627 | -0.318314 | 3.182886 | 0.653149 | 1 ACTR3B        | K18584 |
| ENSG00000160813 | -0.299072 | 5.549091 | 0.653213 | 1 PPP1R35       | K17574 |
| ENSG00000126890 | -0.295505 | 7.277963 | 0.653247 | 1 CTAG2         | -      |
| ENSG00000169410 | -0.300078 | 5.383752 | 0.6533   | 1 PTPN9         | K18038 |
| ENSG00000149115 | 0.295575  | 6.996669 | 0.653383 | 1 TNKS1BP1      | -      |
| ENSG00000143811 | -0.299625 | 5.340088 | 0.653497 | 1 PYCR2         | K00286 |
| ENSG00000184922 | 0.295344  | 6.304899 | 0.653743 | 1 FMNL1         | -      |
| ENSG00000179967 | -0.302226 | 5.13102  | 0.653983 | 1 PPP1R14BP3    | K17555 |
| ENSG00000118046 | 0.314091  | 2.959451 | 0.654062 | 1 STK11         | K07298 |
| ENSG00000011465 | -0.297938 | 5.654583 | 0.654089 | 1 DCN           | K04660 |
| ENSG00000169230 | -0.29483  | 7.202961 | 0.654092 | 1 PRELID1       | -      |
| ENSG00000242110 | -0.358889 | 2.280688 | 0.654113 | 1 AMACR         | K01796 |
| ENSG00000138381 | -0.302058 | 4.864039 | 0.654122 | 1 ASNSD1        | -      |
| ENSG00000173542 | -0.307943 | 4.478405 | 0.654189 | 1 MOB1B         | K06685 |
| ENSG00000100764 | -0.298737 | 5.501545 | 0.654267 | 1 PSMC1         | K03062 |
| ENSG00000163947 | 0.301792  | 4.748912 | 0.654333 | 1 ARHGEF3       | -      |
| ENSG00000032742 | -0.333771 | 3.124098 | 0.654472 | 1 IFT88         | K16474 |
| ENSG00000170340 | -0.301094 | 5.218315 | 0.654584 | 1 B3GNT2        | K00741 |
| ENSG00000164823 | -0.295629 | 6.456222 | 0.654589 | 1 OSGIN2        | -      |
| ENSG00000180447 | -0.299457 | 5.515017 | 0.654605 | 1 GAS1          | K06232 |
| ENSG00000140521 | 0.297496  | 6.055061 | 0.65461  | 1 POLG          | K02332 |
| ENSG00000178381 | 0.300219  | 4.391222 | 0.654615 | 1 ZFAND2A       | -      |
| ENSG00000203497 | -0.374666 | 1.46258  | 0.654708 | 1 PDCD4-AS1     | -      |
| ENSG00000238261 | -0.374666 | 1.46258  | 0.654708 | 1 RP11-435B5.5  | -      |



|                 |           |          |          |                 |        |
|-----------------|-----------|----------|----------|-----------------|--------|
| ENSG00000241288 | -0.374666 | 1.46258  | 0.654708 | 1 RP11-379B18.5 | -      |
| ENSG00000247317 | -0.374666 | 1.46258  | 0.654708 | 1 RP11-273G15.2 | -      |
| ENSG00000117899 | -0.296475 | 6.140183 | 0.654989 | 1 MESDC2        | -      |
| ENSG00000078902 | 0.30832   | 4.300489 | 0.655095 | 1 TOLLIP        | K05402 |
| ENSG00000153147 | -0.294067 | 7.087918 | 0.655098 | 1 SMARCA5       | K11654 |
| ENSG00000130304 | 0.310334  | 3.908649 | 0.655102 | 1 SLC27A1       | K08745 |
| ENSG00000005961 | 0.326481  | 2.707186 | 0.655284 | 1 ITGA2B        | K06476 |
| ENSG00000080200 | 0.326481  | 2.707186 | 0.655284 | 1 CRYBG3        | -      |
| ENSG00000117877 | -0.318387 | 3.498154 | 0.655309 | 1 CD3EAP        | -      |
| ENSG00000146826 | -0.318387 | 3.498154 | 0.655309 | 1 C7orf43       | -      |
| ENSG00000174953 | -0.296303 | 6.097328 | 0.655506 | 1 DHX36         | K14442 |
| ENSG00000122783 | -0.303184 | 4.146143 | 0.655524 | 1 C7orf49       | -      |
| ENSG00000137962 | -0.298026 | 5.720025 | 0.655566 | 1 ARHGAP29      | K12581 |
| ENSG00000148773 | 0.293056  | 7.451526 | 0.655574 | 1 MKI67         | K17582 |
| ENSG00000167081 | 0.306993  | 4.208502 | 0.655638 | 1 PBX3          | K15610 |
| ENSG00000140563 | 0.293712  | 5.984675 | 0.655747 | 1 MCTP2         | -      |
| ENSG00000181192 | -0.294038 | 6.7015   | 0.655803 | 1 DHTKD1        | K15791 |
| ENSG00000106723 | -0.294287 | 6.566155 | 0.655812 | 1 SPIN1         | -      |
| ENSG00000108278 | -0.397349 | 1.865713 | 0.655991 | 1 ZNHIT3        | K02927 |
| ENSG00000078487 | -0.375039 | 1.852531 | 0.655991 | 1 ZCWPW1        | -      |
| ENSG00000136231 | 0.297493  | 5.696223 | 0.656061 | 1 IGF2BP3       | K13197 |
| ENSG00000111432 | 0.301708  | 3.954774 | 0.656064 | 1 FZD10         | K02842 |
| ENSG00000085117 | 0.303193  | 4.50773  | 0.656076 | 1 CD82          | K06509 |
| ENSG00000100014 | 0.303193  | 4.50773  | 0.656076 | 1 SPECC1L       | -      |
| ENSG00000103021 | -0.313445 | 3.201967 | 0.656133 | 1 CCDC113       | K17985 |
| ENSG00000004487 | 0.292372  | 7.591528 | 0.656182 | 1 KDM1A         | K11450 |
| ENSG00000139178 | 0.293404  | 6.177812 | 0.65621  | 1 C1RL          | -      |
| ENSG00000079385 | 0.487727  | 0.573765 | 0.656347 | 1 CEACAM1       | K06499 |
| ENSG00000129991 | 0.487727  | 0.573765 | 0.656347 | 1 TNNI3         | K12044 |
| ENSG00000166922 | 0.487727  | 0.573765 | 0.656347 | 1 SCG5          | -      |
| ENSG00000167968 | 0.487727  | 0.573765 | 0.656347 | 1 DNASE1L2      | K11995 |
| ENSG00000106484 | -0.43167  | 0.587795 | 0.656347 | 1 MEST          | -      |
| ENSG00000228696 | -0.43167  | 0.587795 | 0.656347 | 1 ARL17B        | K06883 |
| ENSG00000238278 | -0.43167  | 0.587795 | 0.656347 | 1 ALG1L6P       | K03842 |
| ENSG00000114054 | -0.294942 | 6.189027 | 0.65641  | 1 PCCB          | K01966 |
| ENSG00000112130 | -0.295375 | 5.847959 | 0.656483 | 1 RNF8          | K10667 |
| ENSG00000067704 | -0.291678 | 8.258752 | 0.656507 | 1 IARS2         | K01870 |
| ENSG00000167920 | -0.300621 | 4.49205  | 0.656653 | 1 TMEM99        | -      |
| ENSG00000069998 | -0.295777 | 5.538765 | 0.65673  | 1 CECR5         | -      |
| ENSG00000185432 | 0.297188  | 5.381337 | 0.656924 | 1 METTL7A       | K15696 |
| ENSG00000131242 | 0.344855  | 2.401261 | 0.657004 | 1 RAB11FIP4     | K12485 |
| ENSG00000152942 | 0.344855  | 2.401261 | 0.657004 | 1 RAD17         | -      |
| ENSG00000089195 | -0.298703 | 5.035421 | 0.657064 | 1 TRMT6         | K03256 |
| ENSG00000171621 | 0.309052  | 4.145378 | 0.657071 | 1 SPSB1         | K10343 |
| ENSG00000091527 | -0.291637 | 7.625398 | 0.657088 | 1 CDV3          | -      |
| ENSG00000177302 | 0.29575   | 5.724736 | 0.657137 | 1 TOP3A         | K03165 |
| ENSG00000127125 | -0.298308 | 5.178954 | 0.657147 | 1 PPCS          | K01922 |
| ENSG00000107758 | -0.30274  | 4.466533 | 0.65725  | 1 PPP3CB        | K04348 |
| ENSG00000162695 | -0.296125 | 5.400438 | 0.657261 | 1 SLC30A7       | K14692 |
| ENSG00000165283 | -0.292068 | 7.082443 | 0.657304 | 1 STOML2        | -      |
| ENSG00000132170 | -0.300786 | 4.856494 | 0.65742  | 1 PPARG         | K08530 |
| ENSG00000105983 | -0.295649 | 5.231192 | 0.657542 | 1 LMBR1         | K09228 |
| ENSG00000142867 | -0.295557 | 5.357283 | 0.657576 | 1 BCL10         | K07368 |
| ENSG00000248008 | -0.324526 | 3.271937 | 0.657634 | 1 DYNLL1-AS1    | -      |
| ENSG00000100523 | -0.316536 | 3.710523 | 0.657766 | 1 DDHD1         | K13619 |
| ENSG00000147654 | -0.298216 | 4.380787 | 0.657863 | 1 EBAG9         | -      |
| ENSG00000164258 | -0.296491 | 5.460358 | 0.657914 | 1 NDUFS4        | K03937 |
| ENSG00000188186 | -0.293008 | 6.072169 | 0.657922 | 1 LAMTOR4       | -      |

|                 |           |           |          |               |              |
|-----------------|-----------|-----------|----------|---------------|--------------|
| ENSG00000116455 | -0.291822 | 6.415255  | 0.657924 | 1 WDR77       | K13221       |
| ENSG00000006625 | -0.291812 | 6.754391  | 0.658146 | 1 GGCT        | K00682       |
| ENSG00000166532 | 0.290755  | 7.314219  | 0.658261 | 1 RIMKLB      | K18310       |
| ENSG00000114999 | -0.291963 | 6.604024  | 0.658282 | 1 TTL         | K06047       |
| ENSG00000135776 | -0.298425 | 5.168032  | 0.658289 | 1 ABCB10      | K05657       |
| ENSG00000019582 | 1.8725    | -1.801828 | 0.658385 | 1 CD74        | K06505       |
| ENSG00000054356 | 1.8725    | -1.801828 | 0.658385 | 1 PTPRN       | K07817       |
| ENSG00000071246 | 1.8725    | -1.801828 | 0.658385 | 1 VASH1       | -            |
| ENSG00000100167 | 1.8725    | -1.801828 | 0.658385 | 1             | 3-Sep K16938 |
| ENSG00000102317 | 1.8725    | -1.801828 | 0.658385 | 1 RBM3        | K13186       |
| ENSG00000103472 | 1.8725    | -1.801828 | 0.658385 | 1 RRN3P2      | K15216       |
| ENSG00000105549 | 1.8725    | -1.801828 | 0.658385 | 1 THEG        | -            |
| ENSG00000106819 | 1.8725    | -1.801828 | 0.658385 | 1 ASPN        | K08120       |
| ENSG00000110852 | 1.8725    | -1.801828 | 0.658385 | 1 CLEC2B      | K10071       |
| ENSG00000111834 | 1.8725    | -1.801828 | 0.658385 | 1 RSPH4A      | K19756       |
| ENSG00000114124 | 1.8725    | -1.801828 | 0.658385 | 1 GRK7        | K00909       |
| ENSG00000117152 | 1.8725    | -1.801828 | 0.658385 | 1 RGS4        | K16449       |
| ENSG00000117971 | 1.8725    | -1.801828 | 0.658385 | 1 CHRNB4      | K04815       |
| ENSG00000124429 | 1.8725    | -1.801828 | 0.658385 | 1 POF1B       | -            |
| ENSG00000124529 | 1.8725    | -1.801828 | 0.658385 | 1 HIST1H4B    | K11254       |
| ENSG00000126860 | 1.8725    | -1.801828 | 0.658385 | 1 EVI2A       | K16854       |
| ENSG00000128268 | 1.8725    | -1.801828 | 0.658385 | 1 MGAT3       | K00737       |
| ENSG00000128271 | 1.8725    | -1.801828 | 0.658385 | 1 ADORA2A     | K04266       |
| ENSG00000130528 | 1.8725    | -1.801828 | 0.658385 | 1 HRC         | -            |
| ENSG00000134516 | 1.8725    | -1.801828 | 0.658385 | 1 DOCK2       | K12367       |
| ENSG00000139351 | 1.8725    | -1.801828 | 0.658385 | 1 SYCP3       | K19528       |
| ENSG00000140481 | 1.8725    | -1.801828 | 0.658385 | 1 CCDC33      | -            |
| ENSG00000140832 | 1.8725    | -1.801828 | 0.658385 | 1 MARVELD3    | -            |
| ENSG00000144550 | 1.8725    | -1.801828 | 0.658385 | 1 CPNE9       | -            |
| ENSG00000146013 | 1.8725    | -1.801828 | 0.658385 | 1 GFRA3       | -            |
| ENSG00000152487 | 1.8725    | -1.801828 | 0.658385 | 1 ARL5B-AS1   | -            |
| ENSG00000154330 | 1.8725    | -1.801828 | 0.658385 | 1 PGM5        | K15636       |
| ENSG00000154451 | 1.8725    | -1.801828 | 0.658385 | 1 GBP5        | -            |
| ENSG00000157152 | 1.8725    | -1.801828 | 0.658385 | 1 SYN2        | -            |
| ENSG00000158869 | 1.8725    | -1.801828 | 0.658385 | 1 FCER1G      | K07983       |
| ENSG00000159197 | 1.8725    | -1.801828 | 0.658385 | 1 KCNE2       | K04896       |
| ENSG00000159208 | 1.8725    | -1.801828 | 0.658385 | 1 C1orf51     | K02927       |
| ENSG00000159625 | 1.8725    | -1.801828 | 0.658385 | 1 CCDC135     | K18643       |
| ENSG00000162188 | 1.8725    | -1.801828 | 0.658385 | 1 GNG3        | K04540       |
| ENSG00000162595 | 1.8725    | -1.801828 | 0.658385 | 1 DIRAS3      | K07842       |
| ENSG00000165076 | 1.8725    | -1.801828 | 0.658385 | 1 PRSS37      | -            |
| ENSG00000166323 | 1.8725    | -1.801828 | 0.658385 | 1 C11orf65    | -            |
| ENSG00000166923 | 1.8725    | -1.801828 | 0.658385 | 1 GREM1       | -            |
| ENSG00000170166 | 1.8725    | -1.801828 | 0.658385 | 1 HOXD4       | K09304       |
| ENSG00000170262 | 1.8725    | -1.801828 | 0.658385 | 1 MRAP        | -            |
| ENSG00000170419 | 1.8725    | -1.801828 | 0.658385 | 1 VSTM2A      | -            |
| ENSG00000171657 | 1.8725    | -1.801828 | 0.658385 | 1 GPR82       | K08420       |
| ENSG00000178660 | 1.8725    | -1.801828 | 0.658385 | 1 ARMC10P1    | -            |
| ENSG00000179256 | 1.8725    | -1.801828 | 0.658385 | 1 SMCO3       | -            |
| ENSG00000179403 | 1.8725    | -1.801828 | 0.658385 | 1 VWA1        | -            |
| ENSG00000180537 | 1.8725    | -1.801828 | 0.658385 | 1 RNF182      | K11983       |
| ENSG00000180846 | 1.8725    | -1.801828 | 0.658385 | 1 CSNK1G2-AS1 | -            |
| ENSG00000182162 | 1.8725    | -1.801828 | 0.658385 | 1 P2RY8       | K08386       |
| ENSG00000182676 | 1.8725    | -1.801828 | 0.658385 | 1 PPP1R27     | K17566       |
| ENSG00000182866 | 1.8725    | -1.801828 | 0.658385 | 1 LCK         | K05856       |
| ENSG00000182872 | 1.8725    | -1.801828 | 0.658385 | 1 RBM10       | K13094       |
| ENSG00000184908 | 1.8725    | -1.801828 | 0.658385 | 1 CLCNKB      | K05018       |
| ENSG00000188293 | 1.8725    | -1.801828 | 0.658385 | 1 IGFL1       | -            |

|                 |        |           |          |                  |        |
|-----------------|--------|-----------|----------|------------------|--------|
| ENSG00000188981 | 1.8725 | -1.801828 | 0.658385 | 1 MSANTD1        | -      |
| ENSG00000196132 | 1.8725 | -1.801828 | 0.658385 | 1 MYT1           | -      |
| ENSG00000197361 | 1.8725 | -1.801828 | 0.658385 | 1 FBXL22         | K10288 |
| ENSG00000197753 | 1.8725 | -1.801828 | 0.658385 | 1 LHFPL5         | -      |
| ENSG00000199072 | 1.8725 | -1.801828 | 0.658385 | 1 MIRLET7F1      | -      |
| ENSG00000200394 | 1.8725 | -1.801828 | 0.658385 | 1 SNORA38B       | -      |
| ENSG00000200677 | 1.8725 | -1.801828 | 0.658385 | 1 SNORD18        | -      |
| ENSG00000201121 | 1.8725 | -1.801828 | 0.658385 | 1 Y_RNA          | -      |
| ENSG00000201264 | 1.8725 | -1.801828 | 0.658385 | 1 SNORD73        | -      |
| ENSG00000203499 | 1.8725 | -1.801828 | 0.658385 | 1 FAM83H-AS1     | -      |
| ENSG00000203843 | 1.8725 | -1.801828 | 0.658385 | 1 PFN1P2         | K05759 |
| ENSG00000204323 | 1.8725 | -1.801828 | 0.658385 | 1 SMIM5          | -      |
| ENSG00000204581 | 1.8725 | -1.801828 | 0.658385 | 1 AC096670.3     | -      |
| ENSG00000205622 | 1.8725 | -1.801828 | 0.658385 | 1 AF064858.6     | -      |
| ENSG00000206044 | 1.8725 | -1.801828 | 0.658385 | 1 AC005841.1     | -      |
| ENSG00000207110 | 1.8725 | -1.801828 | 0.658385 | 1 RNU1-106P      | -      |
| ENSG00000207119 | 1.8725 | -1.801828 | 0.658385 | 1 U3             | -      |
| ENSG00000207234 | 1.8725 | -1.801828 | 0.658385 | 1 RNU6-125P      | -      |
| ENSG00000207980 | 1.8725 | -1.801828 | 0.658385 | 1 MIR23A         | -      |
| ENSG00000212327 | 1.8725 | -1.801828 | 0.658385 | 1 RNU6-882P      | -      |
| ENSG00000212493 | 1.8725 | -1.801828 | 0.658385 | 1 SNORD19        | -      |
| ENSG00000213260 | 1.8725 | -1.801828 | 0.658385 | 1 YWHAZP5        | K16197 |
| ENSG00000213279 | 1.8725 | -1.801828 | 0.658385 | 1 RP1-29C18.9    | -      |
| ENSG00000213612 | 1.8725 | -1.801828 | 0.658385 | 1 FAM220CP       | -      |
| ENSG00000213939 | 1.8725 | -1.801828 | 0.658385 | 1 RP11-314A20.1  | K02951 |
| ENSG00000214425 | 1.8725 | -1.801828 | 0.658385 | 1 LRRC37A4P      | K09228 |
| ENSG00000215156 | 1.8725 | -1.801828 | 0.658385 | 1 RP11-1023L17.2 | -      |
| ENSG00000221051 | 1.8725 | -1.801828 | 0.658385 | 1 AC118344.1     | -      |
| ENSG00000223442 | 1.8725 | -1.801828 | 0.658385 | 1 AC004041.2     | -      |
| ENSG00000223552 | 1.8725 | -1.801828 | 0.658385 | 1 RP11-24F11.2   | -      |
| ENSG00000223635 | 1.8725 | -1.801828 | 0.658385 | 1 RP4-613A2.1    | -      |
| ENSG00000223734 | 1.8725 | -1.801828 | 0.658385 | 1 RP11-644K8.1   | -      |
| ENSG00000223849 | 1.8725 | -1.801828 | 0.658385 | 1 RP11-80I15.1   | K02976 |
| ENSG00000223922 | 1.8725 | -1.801828 | 0.658385 | 1 ASS1P2         | K01940 |
| ENSG00000224993 | 1.8725 | -1.801828 | 0.658385 | 1 RPL29P12       | K02905 |
| ENSG00000226065 | 1.8725 | -1.801828 | 0.658385 | 1 ZBTB45P2       | K10516 |
| ENSG00000226155 | 1.8725 | -1.801828 | 0.658385 | 1 AC124944.3     | -      |
| ENSG00000226306 | 1.8725 | -1.801828 | 0.658385 | 1 NPY6R          | K04208 |
| ENSG00000226352 | 1.8725 | -1.801828 | 0.658385 | 1 RP11-523H24.3  | -      |
| ENSG00000226771 | 1.8725 | -1.801828 | 0.658385 | 1 AP001136.2     | -      |
| ENSG00000226874 | 1.8725 | -1.801828 | 0.658385 | 1 AC005154.8     | K04969 |
| ENSG00000228056 | 1.8725 | -1.801828 | 0.658385 | 1 CFLIP3         | K05765 |
| ENSG00000228158 | 1.8725 | -1.801828 | 0.658385 | 1 TLE1P1         | -      |
| ENSG00000228719 | 1.8725 | -1.801828 | 0.658385 | 1 RP5-1119A7.14  | -      |
| ENSG00000231393 | 1.8725 | -1.801828 | 0.658385 | 1 RP11-331F9.3   | -      |
| ENSG00000231441 | 1.8725 | -1.801828 | 0.658385 | 1 RP11-472M19.2  | -      |
| ENSG00000231966 | 1.8725 | -1.801828 | 0.658385 | 1 RP11-12M5.4    | -      |
| ENSG00000232034 | 1.8725 | -1.801828 | 0.658385 | 1 AC092168.2     | -      |
| ENSG00000232387 | 1.8725 | -1.801828 | 0.658385 | 1 SKA2P1         | K10608 |
| ENSG00000232874 | 1.8725 | -1.801828 | 0.658385 | 1 RP11-135A1.2   | -      |
| ENSG00000234380 | 1.8725 | -1.801828 | 0.658385 | 1 AP000330.8     | -      |
| ENSG00000234537 | 1.8725 | -1.801828 | 0.658385 | 1 RP11-100G15.7  | K18036 |
| ENSG00000235066 | 1.8725 | -1.801828 | 0.658385 | 1 AC009303.1     | -      |
| ENSG00000235070 | 1.8725 | -1.801828 | 0.658385 | 1 AC068138.1     | -      |
| ENSG00000235138 | 1.8725 | -1.801828 | 0.658385 | 1 RP11-374P20.4  | -      |
| ENSG00000235545 | 1.8725 | -1.801828 | 0.658385 | 1 RP11-230B22.1  | -      |
| ENSG00000235660 | 1.8725 | -1.801828 | 0.658385 | 1 LINC00345      | -      |
| ENSG00000235878 | 1.8725 | -1.801828 | 0.658385 | 1 AP001468.1     | -      |

|                 |        |           |          |                  |        |
|-----------------|--------|-----------|----------|------------------|--------|
| ENSG00000236095 | 1.8725 | -1.801828 | 0.658385 | 1 RP11-49O14.2   | -      |
| ENSG00000236383 | 1.8725 | -1.801828 | 0.658385 | 1 LINC00854      | -      |
| ENSG00000236397 | 1.8725 | -1.801828 | 0.658385 | 1 DDX11L2        | K11273 |
| ENSG00000236833 | 1.8725 | -1.801828 | 0.658385 | 1 AC024560.2     | -      |
| ENSG00000237301 | 1.8725 | -1.801828 | 0.658385 | 1 RP4-680D5.2    | -      |
| ENSG00000237575 | 1.8725 | -1.801828 | 0.658385 | 1 PYY2           | K05233 |
| ENSG00000237742 | 1.8725 | -1.801828 | 0.658385 | 1 RP11-624M8.1   | -      |
| ENSG00000237819 | 1.8725 | -1.801828 | 0.658385 | 1 AC002454.1     | -      |
| ENSG00000237828 | 1.8725 | -1.801828 | 0.658385 | 1 PA2G4P1        | -      |
| ENSG00000237945 | 1.8725 | -1.801828 | 0.658385 | 1 LINC00649      | -      |
| ENSG00000240905 | 1.8725 | -1.801828 | 0.658385 | 1 RN7SL798P      | -      |
| ENSG00000241322 | 1.8725 | -1.801828 | 0.658385 | 1 CDRT1          | K10266 |
| ENSG00000241527 | 1.8725 | -1.801828 | 0.658385 | 1 CA15P1         | K01672 |
| ENSG00000243243 | 1.8725 | -1.801828 | 0.658385 | 1 AC073130.3     | -      |
| ENSG00000247372 | 1.8725 | -1.801828 | 0.658385 | 1 CTD-2235C13.2  | -      |
| ENSG00000247934 | 1.8725 | -1.801828 | 0.658385 | 1 RP11-967K21.1  | -      |
| ENSG00000248213 | 1.8725 | -1.801828 | 0.658385 | 1 CICP16         | K16941 |
| ENSG00000248923 | 1.8725 | -1.801828 | 0.658385 | 1 MTND5P11       | K03883 |
| ENSG00000249141 | 1.8725 | -1.801828 | 0.658385 | 1 RP11-514O12.4  | K01166 |
| ENSG00000250299 | 1.8725 | -1.801828 | 0.658385 | 1 MRPS31P4       | K17410 |
| ENSG00000250432 | 1.8725 | -1.801828 | 0.658385 | 1 RP11-834C11.5  | -      |
| ENSG00000250569 | 1.8725 | -1.801828 | 0.658385 | 1 NTAN1P2        | K14662 |
| ENSG00000250816 | 1.8725 | -1.801828 | 0.658385 | 1 DCAF13P2       | K11806 |
| ENSG00000251775 | 1.8725 | -1.801828 | 0.658385 | 1 ACA59          | -      |
| ENSG00000252311 | 1.8725 | -1.801828 | 0.658385 | 1 RNU1-103P      | -      |
| ENSG00000252503 | 1.8725 | -1.801828 | 0.658385 | 1 RNU6-531P      | -      |
| ENSG00000252641 | 1.8725 | -1.801828 | 0.658385 | 1 RNU6-678P      | -      |
| ENSG00000253047 | 1.8725 | -1.801828 | 0.658385 | 1 SNORA40        | -      |
| ENSG00000253121 | 1.8725 | -1.801828 | 0.658385 | 1 RP11-659E9.4   | -      |
| ENSG00000253892 | 1.8725 | -1.801828 | 0.658385 | 1 RP11-770E5.2   | -      |
| ENSG00000253908 | 1.8725 | -1.801828 | 0.658385 | 1 RP11-252I14.2  | -      |
| ENSG00000254911 | 1.8725 | -1.801828 | 0.658385 | 1 SCARNA9        | -      |
| ENSG00000255185 | 1.8725 | -1.801828 | 0.658385 | 1 PDXDC2P        | -      |
| ENSG00000255507 | 1.8725 | -1.801828 | 0.658385 | 1 RP11-535A19.2  | -      |
| ENSG00000255509 | 1.8725 | -1.801828 | 0.658385 | 1 RP11-445F12.1  | -      |
| ENSG00000256360 | 1.8725 | -1.801828 | 0.658385 | 1 RP11-707G14.7  | -      |
| ENSG00000256897 | 1.8725 | -1.801828 | 0.658385 | 1 RP11-17G12.2   | -      |
| ENSG00000257058 | 1.8725 | -1.801828 | 0.658385 | 1 RP11-864I4.4   | -      |
| ENSG00000257150 | 1.8725 | -1.801828 | 0.658385 | 1 PGAM1P5        | K01834 |
| ENSG00000257221 | 1.8725 | -1.801828 | 0.658385 | 1 RP11-689B22.2  | -      |
| ENSG00000257527 | 1.8725 | -1.801828 | 0.658385 | 1 MIR3179-3      | -      |
| ENSG00000257771 | 1.8725 | -1.801828 | 0.658385 | 1 RP11-70F11.8   | -      |
| ENSG00000258376 | 1.8725 | -1.801828 | 0.658385 | 1 RP4-647C14.2   | -      |
| ENSG00000259191 | 1.8725 | -1.801828 | 0.658385 | 1 RP11-253M7.3   | K01557 |
| ENSG00000259209 | 1.8725 | -1.801828 | 0.658385 | 1 RP5-991G20.2   | -      |
| ENSG00000259294 | 1.8725 | -1.801828 | 0.658385 | 1 CTA-339C12.1   | -      |
| ENSG00000259323 | 1.8725 | -1.801828 | 0.658385 | 1 RP13-608F4.5   | K01528 |
| ENSG00000259345 | 1.8725 | -1.801828 | 0.658385 | 1 RP11-624L4.1   | -      |
| ENSG00000259581 | 1.8725 | -1.801828 | 0.658385 | 1 TYRO3P         | K05116 |
| ENSG00000259618 | 1.8725 | -1.801828 | 0.658385 | 1 RP11-562A8.5   | -      |
| ENSG00000259804 | 1.8725 | -1.801828 | 0.658385 | 1 CTD-2012K14.7  | -      |
| ENSG00000259915 | 1.8725 | -1.801828 | 0.658385 | 1 RP11-410E4.1   | -      |
| ENSG00000260167 | 1.8725 | -1.801828 | 0.658385 | 1 RP11-146F11.5  | -      |
| ENSG00000260470 | 1.8725 | -1.801828 | 0.658385 | 1 RP11-834C11.11 | -      |
| ENSG00000260711 | 1.8725 | -1.801828 | 0.658385 | 1 RP11-747H7.3   | -      |
| ENSG00000261140 | 1.8725 | -1.801828 | 0.658385 | 1 RP11-20I23.6   | -      |
| ENSG00000261172 | 1.8725 | -1.801828 | 0.658385 | 1 RP11-356C4.5   | -      |
| ENSG00000261312 | 1.8725 | -1.801828 | 0.658385 | 1 AC002550.5     | -      |

|                  |          |           |          |                 |        |
|------------------|----------|-----------|----------|-----------------|--------|
| ENSG00000261420  | 1.8725   | -1.801828 | 0.658385 | 1 RP1-168L15.5  | -      |
| ENSG00000262837  | 1.8725   | -1.801828 | 0.658385 | 1 RP11-304F15.7 | -      |
| ENSG00000263063  | 1.8725   | -1.801828 | 0.658385 | 1 RP11-388C12.1 | -      |
| ENSG00000263400  | 1.8725   | -1.801828 | 0.658385 | 1 CTC-297N7.5   | -      |
| ENSG00000264237  | 1.8725   | -1.801828 | 0.658385 | 1 AL137846.1    | -      |
| ENSG00000265369  | 1.8725   | -1.801828 | 0.658385 | 1 U3            | -      |
| ENSG00000265407  | 1.8725   | -1.801828 | 0.658385 | 1 MIR4324       | -      |
| ENSG00000265802  | 1.8725   | -1.801828 | 0.658385 | 1 RN7SL49P      | -      |
| ENSG00000266232  | 1.8725   | -1.801828 | 0.658385 | 1 MIR3178       | -      |
| ENSG00000266924  | 1.8725   | -1.801828 | 0.658385 | 1 RP11-154H12.2 | -      |
| ENSG00000267003  | 1.8725   | -1.801828 | 0.658385 | 1 CTC-507E2.1   | -      |
| ENSG00000267159  | 1.8725   | -1.801828 | 0.658385 | 1 AC005391.2    | -      |
| ENSG00000267425  | 1.8725   | -1.801828 | 0.658385 | 1 RP11-128P17.1 | -      |
| ENSG00000267481  | 1.8725   | -1.801828 | 0.658385 | 1 CTC-559E9.5   | -      |
| ENSG00000267706  | 1.8725   | -1.801828 | 0.658385 | 1 CTD-2105E13.6 | K02267 |
| ENSG00000267848  | 1.8725   | -1.801828 | 0.658385 | 1 AL118506.1    | -      |
| ENSG00000268536  | 1.8725   | -1.801828 | 0.658385 | 1 AC005523.3    | -      |
| ENSG00000268650  | 1.8725   | -1.801828 | 0.658385 | 1 AC068499.10   | -      |
| ENSG00000269305  | 1.8725   | -1.801828 | 0.658385 | 1 AL158147.2    | -      |
| ENSG00000269358  | 1.8725   | -1.801828 | 0.658385 | 1 AC138393.1    | K11447 |
| ENSG00000269591  | 1.8725   | -1.801828 | 0.658385 | 1 AL354808.2    | -      |
| ENSG00000269859  | 1.8725   | -1.801828 | 0.658385 | 1 CTD-2537I9.16 | -      |
| ENSG00000270107  | 1.8725   | -1.801828 | 0.658385 | 1 CTD-2306M10.1 | -      |
| ENSG00000270147  | 1.8725   | -1.801828 | 0.658385 | 1 RP11-646I6.6  | -      |
| ENSG00000270194  | 1.8725   | -1.801828 | 0.658385 | 1 RP11-259K5.2  | -      |
| ENSG00000270426  | 1.8725   | -1.801828 | 0.658385 | 1 RP11-326I11.5 | -      |
| ENSG00000270532  | 1.8725   | -1.801828 | 0.658385 | 1 PEBP1P2       | -      |
| ENSG00000270903  | 1.8725   | -1.801828 | 0.658385 | 1 HNRNPA3P9     | K12741 |
| ENSG00000270956  | 1.8725   | -1.801828 | 0.658385 | 1 RP11-65L3.4   | -      |
| ENSG00000271064  | 1.8725   | -1.801828 | 0.658385 | 1 RP11-792A8.3  | -      |
| ENSG00000271367  | 1.8725   | -1.801828 | 0.658385 | 1 RP3-483K16.4  | -      |
| ENSG00000271424  | 1.8725   | -1.801828 | 0.658385 | 1 RP11-647O20.1 | -      |
| ENSG00000271555  | 1.8725   | -1.801828 | 0.658385 | 1 CTD-3214K23.1 | -      |
| ENSG00000271723  | 1.8725   | -1.801828 | 0.658385 | 1 MROH7-TTC4    | K01881 |
| ENSG00000271869  | 1.8725   | -1.801828 | 0.658385 | 1 RP11-51J9.5   | -      |
| ENSG00000271880  | 1.8725   | -1.801828 | 0.658385 | 1 RP11-96C23.5  | -      |
| ENSG00000272434  | 1.8725   | -1.801828 | 0.658385 | 1 RP13-131K19.6 | -      |
| ENSG00000272597  | 1.8725   | -1.801828 | 0.658385 | 1 RP11-446H18.6 | -      |
| ENSG00000272915  | 1.8725   | -1.801828 | 0.658385 | 1 RP11-62J1.4   | -      |
| ENSG00000272949  | 1.8725   | -1.801828 | 0.658385 | 1 RP11-514P8.8  | -      |
| ENSG00000273129  | 1.8725   | -1.801828 | 0.658385 | 1 RP5-973M2.2   | -      |
| ENSG00000273320  | 1.8725   | -1.801828 | 0.658385 | 1 RP11-22N19.2  | -      |
| ENSG00000273368  | 1.8725   | -1.801828 | 0.658385 | 1 RP11-376P6.3  | -      |
| ENSG00000005844  | 0.980265 | -1.616597 | 0.658385 | 1 ITGAL         | K05718 |
| ENSG000000053524 | 0.980265 | -1.616597 | 0.658385 | 1 MCF2L2        | K04372 |
| ENSG000000092529 | 0.980265 | -1.616597 | 0.658385 | 1 CAPN3         | K08573 |
| ENSG000000099866 | 0.980265 | -1.616597 | 0.658385 | 1 MADCAM1       | K06779 |
| ENSG00000100055  | 0.980265 | -1.616597 | 0.658385 | 1 CYTH4         | K18441 |
| ENSG00000105467  | 0.980265 | -1.616597 | 0.658385 | 1 SYNGR4        | -      |
| ENSG00000106631  | 0.980265 | -1.616597 | 0.658385 | 1 MYL7          | K12754 |
| ENSG00000109083  | 0.980265 | -1.616597 | 0.658385 | 1 IFT20         | K16473 |
| ENSG00000121905  | 0.980265 | -1.616597 | 0.658385 | 1 HPCA          | K19695 |
| ENSG00000125414  | 0.980265 | -1.616597 | 0.658385 | 1 MYH2          | K10352 |
| ENSG00000125997  | 0.980265 | -1.616597 | 0.658385 | 1 BPIFB9P       | -      |
| ENSG00000129675  | 0.980265 | -1.616597 | 0.658385 | 1 ARHGGEF6      | K05729 |
| ENSG00000130822  | 0.980265 | -1.616597 | 0.658385 | 1 PNCK          | K08795 |
| ENSG00000131409  | 0.980265 | -1.616597 | 0.658385 | 1 LRRC4B        | K16360 |
| ENSG00000137857  | 0.980265 | -1.616597 | 0.658385 | 1 DUOX1         | K13411 |

|                 |          |           |          |                |        |
|-----------------|----------|-----------|----------|----------------|--------|
| ENSG00000139209 | 0.980265 | -1.616597 | 0.658385 | 1 SLC38A4      | K14991 |
| ENSG00000139988 | 0.980265 | -1.616597 | 0.658385 | 1 RDH12        | K11153 |
| ENSG00000142303 | 0.980265 | -1.616597 | 0.658385 | 1 ADAMTS10     | K08625 |
| ENSG00000142549 | 0.980265 | -1.616597 | 0.658385 | 1 IGLON5       | K06773 |
| ENSG00000144063 | 0.980265 | -1.616597 | 0.658385 | 1 MALL         | -      |
| ENSG00000145113 | 0.980265 | -1.616597 | 0.658385 | 1 MUC4         | -      |
| ENSG00000148832 | 0.980265 | -1.616597 | 0.658385 | 1 PAOX         | K00308 |
| ENSG00000155269 | 0.980265 | -1.616597 | 0.658385 | 1 GPR78        | -      |
| ENSG00000157017 | 0.980265 | -1.616597 | 0.658385 | 1 GHRL         | K05254 |
| ENSG00000159239 | 0.980265 | -1.616597 | 0.658385 | 1 C2orf81      | -      |
| ENSG00000159496 | 0.980265 | -1.616597 | 0.658385 | 1 RGL4         | K08732 |
| ENSG00000159860 | 0.980265 | -1.616597 | 0.658385 | 1 FAM115D      | -      |
| ENSG00000162510 | 0.980265 | -1.616597 | 0.658385 | 1 MATN1        | -      |
| ENSG00000164188 | 0.980265 | -1.616597 | 0.658385 | 1 RANBP3L      | K15304 |
| ENSG00000165171 | 0.980265 | -1.616597 | 0.658385 | 1 WBSCR27      | -      |
| ENSG00000165807 | 0.980265 | -1.616597 | 0.658385 | 1 PPP1R36      | K17575 |
| ENSG00000167046 | 0.980265 | -1.616597 | 0.658385 | 1 RP11-93B14.6 | -      |
| ENSG00000167261 | 0.980265 | -1.616597 | 0.658385 | 1 DPEP2        | K01273 |
| ENSG00000168675 | 0.980265 | -1.616597 | 0.658385 | 1 LDLRAD4      | -      |
| ENSG00000171817 | 0.980265 | -1.616597 | 0.658385 | 1 ZNF540       | K09228 |
| ENSG00000172264 | 0.980265 | -1.616597 | 0.658385 | 1 MACROD2      | -      |
| ENSG00000172575 | 0.980265 | -1.616597 | 0.658385 | 1 RASGRP1      | K04350 |
| ENSG00000174428 | 0.980265 | -1.616597 | 0.658385 | 1 GTF2IRD2B    | K03121 |
| ENSG00000174595 | 0.980265 | -1.616597 | 0.658385 | 1 KLF14        | K09208 |
| ENSG00000174788 | 0.980265 | -1.616597 | 0.658385 | 1 PCP2         | -      |
| ENSG00000175262 | 0.980265 | -1.616597 | 0.658385 | 1 C1orf127     | -      |
| ENSG00000177694 | 0.980265 | -1.616597 | 0.658385 | 1 NAALADL2     | K01301 |
| ENSG00000178776 | 0.980265 | -1.616597 | 0.658385 | 1 C5orf46      | -      |
| ENSG00000184083 | 0.980265 | -1.616597 | 0.658385 | 1 FAM120C      | -      |
| ENSG00000185933 | 0.980265 | -1.616597 | 0.658385 | 1 CALHM1       | K19738 |
| ENSG00000186354 | 0.980265 | -1.616597 | 0.658385 | 1 C9orf47      | -      |
| ENSG00000186417 | 0.980265 | -1.616597 | 0.658385 | 1 GLDN         | K16364 |
| ENSG00000187695 | 0.980265 | -1.616597 | 0.658385 | 1 RP11-723O4.6 | K15980 |
| ENSG00000187848 | 0.980265 | -1.616597 | 0.658385 | 1 P2RX2        | K05216 |
| ENSG00000188176 | 0.980265 | -1.616597 | 0.658385 | 1 SMTNL2       | -      |
| ENSG00000188384 | 0.980265 | -1.616597 | 0.658385 | 1 CSPG4P8      | K08115 |
| ENSG00000188672 | 0.980265 | -1.616597 | 0.658385 | 1 RHCE         | K06579 |
| ENSG00000189366 | 0.980265 | -1.616597 | 0.658385 | 1 ALG1L        | K03842 |
| ENSG00000196507 | 0.980265 | -1.616597 | 0.658385 | 1 TCEAL3       | -      |
| ENSG00000197238 | 0.980265 | -1.616597 | 0.658385 | 1 HIST1H4J     | K11253 |
| ENSG00000197847 | 0.980265 | -1.616597 | 0.658385 | 1 SLC22A20     | K08216 |
| ENSG00000199476 | 0.980265 | -1.616597 | 0.658385 | 1 Y_RNA        | -      |
| ENSG00000200754 | 0.980265 | -1.616597 | 0.658385 | 1 Y_RNA        | -      |
| ENSG00000203280 | 0.980265 | -1.616597 | 0.658385 | 1 CTA-221G9.11 | -      |
| ENSG00000206762 | 0.980265 | -1.616597 | 0.658385 | 1 RNU6-418P    | -      |
| ENSG00000206992 | 0.980265 | -1.616597 | 0.658385 | 1 RNU6-574P    | -      |
| ENSG00000211452 | 0.980265 | -1.616597 | 0.658385 | 1 DIO1         | K01562 |
| ENSG00000212443 | 0.980265 | -1.616597 | 0.658385 | 1 SNORA53      | -      |
| ENSG00000213077 | 0.980265 | -1.616597 | 0.658385 | 1 FAM106A      | K14993 |
| ENSG00000213149 | 0.980265 | -1.616597 | 0.658385 | 1 CNN2P9       | K15411 |
| ENSG00000213290 | 0.980265 | -1.616597 | 0.658385 | 1 PGK1P2       | K00927 |
| ENSG00000213513 | 0.980265 | -1.616597 | 0.658385 | 1 RP13-39P12.2 | K00088 |
| ENSG00000213942 | 0.980265 | -1.616597 | 0.658385 | 1 RP1-102E24.1 | K02910 |
| ENSG00000214353 | 0.980265 | -1.616597 | 0.658385 | 1 VAC14-AS1    | -      |
| ENSG00000214650 | 0.980265 | -1.616597 | 0.658385 | 1 RP11-83B20.1 | -      |
| ENSG00000215498 | 0.980265 | -1.616597 | 0.658385 | 1 FAM230B      | -      |
| ENSG00000220702 | 0.980265 | -1.616597 | 0.658385 | 1 RP1-32I10.10 | -      |
| ENSG00000221540 | 0.980265 | -1.616597 | 0.658385 | 1 MIR1180      | -      |

|                 |          |           |          |                  |        |
|-----------------|----------|-----------|----------|------------------|--------|
| ENSG00000221946 | 0.980265 | -1.616597 | 0.658385 | 1 FXYD7          | K13364 |
| ENSG00000222306 | 0.980265 | -1.616597 | 0.658385 | 1 Y_RNA          | -      |
| ENSG00000223404 | 0.980265 | -1.616597 | 0.658385 | 1 LINC00397      | -      |
| ENSG00000224383 | 0.980265 | -1.616597 | 0.658385 | 1 C17orf72       | -      |
| ENSG00000224437 | 0.980265 | -1.616597 | 0.658385 | 1 PIGUP1         | K05293 |
| ENSG00000224892 | 0.980265 | -1.616597 | 0.658385 | 1 RPS4XP16       | K02987 |
| ENSG00000224971 | 0.980265 | -1.616597 | 0.658385 | 1 SUMO2P3        | K12160 |
| ENSG00000225850 | 0.980265 | -1.616597 | 0.658385 | 1 RP11-452K12.4  | -      |
| ENSG00000226330 | 0.980265 | -1.616597 | 0.658385 | 1 RP11-739N20.2  | -      |
| ENSG00000227376 | 0.980265 | -1.616597 | 0.658385 | 1 FTH1P16        | K00522 |
| ENSG00000227470 | 0.980265 | -1.616597 | 0.658385 | 1 AC073415.2     | -      |
| ENSG00000227495 | 0.980265 | -1.616597 | 0.658385 | 1 AC109333.10    | -      |
| ENSG00000228446 | 0.980265 | -1.616597 | 0.658385 | 1 AC073052.1     | -      |
| ENSG00000228463 | 0.980265 | -1.616597 | 0.658385 | 1 AP006222.2     | -      |
| ENSG00000228570 | 0.980265 | -1.616597 | 0.658385 | 1 NUTM2E         | -      |
| ENSG00000228792 | 0.980265 | -1.616597 | 0.658385 | 1 RP11-354K1.2   | -      |
| ENSG00000228917 | 0.980265 | -1.616597 | 0.658385 | 1 RP11-544M22.8  | -      |
| ENSG00000229487 | 0.980265 | -1.616597 | 0.658385 | 1 ALG13-AS1      | -      |
| ENSG00000230149 | 0.980265 | -1.616597 | 0.658385 | 1 RP3-508I15.19  | -      |
| ENSG00000230869 | 0.980265 | -1.616597 | 0.658385 | 1 CTGLF10P       | K12491 |
| ENSG00000231645 | 0.980265 | -1.616597 | 0.658385 | 1 AC025627.9     | K07604 |
| ENSG00000231971 | 0.980265 | -1.616597 | 0.658385 | 1 RP11-557H15.3  | -      |
| ENSG00000232149 | 0.980265 | -1.616597 | 0.658385 | 1 FERP1          | K08889 |
| ENSG00000232372 | 0.980265 | -1.616597 | 0.658385 | 1 RP11-504P24.2  | K13051 |
| ENSG00000232491 | 0.980265 | -1.616597 | 0.658385 | 1 RP4-756H11.1   | -      |
| ENSG00000233469 | 0.980265 | -1.616597 | 0.658385 | 1 ST6GALNAC4P1   | -      |
| ENSG00000234035 | 0.980265 | -1.616597 | 0.658385 | 1 AP001044.2     | -      |
| ENSG00000234817 | 0.980265 | -1.616597 | 0.658385 | 1 RP3-400B16.1   | -      |
| ENSG00000234921 | 0.980265 | -1.616597 | 0.658385 | 1 RP11-85O21.5   | -      |
| ENSG00000235079 | 0.980265 | -1.616597 | 0.658385 | 1 ZRANB2-AS1     | -      |
| ENSG00000235852 | 0.980265 | -1.616597 | 0.658385 | 1 AC005540.3     | -      |
| ENSG00000236975 | 0.980265 | -1.616597 | 0.658385 | 1 RP5-1065P14.2  | -      |
| ENSG00000236998 | 0.980265 | -1.616597 | 0.658385 | 1 RP11-203L2.3   | K12398 |
| ENSG00000237903 | 0.980265 | -1.616597 | 0.658385 | 1 RP3-404F18.5   | -      |
| ENSG00000237950 | 0.980265 | -1.616597 | 0.658385 | 1 RP11-7O11.3    | -      |
| ENSG00000238386 | 0.980265 | -1.616597 | 0.658385 | 1 RNU7-48P       | -      |
| ENSG00000238715 | 0.980265 | -1.616597 | 0.658385 | 1 snoU13         | -      |
| ENSG00000238741 | 0.980265 | -1.616597 | 0.658385 | 1 SCARNA7        | -      |
| ENSG00000238922 | 0.980265 | -1.616597 | 0.658385 | 1 snoU13         | -      |
| ENSG00000239335 | 0.980265 | -1.616597 | 0.658385 | 1 RP11-745O10.2  | -      |
| ENSG00000239470 | 0.980265 | -1.616597 | 0.658385 | 1 RP11-16F15.2   | K02889 |
| ENSG00000239494 | 0.980265 | -1.616597 | 0.658385 | 1 RN7SL333P      | -      |
| ENSG00000240005 | 0.980265 | -1.616597 | 0.658385 | 1 RP11-293A21.1  | -      |
| ENSG00000240449 | 0.980265 | -1.616597 | 0.658385 | 1 RP4-584D14.5   | -      |
| ENSG00000240591 | 0.980265 | -1.616597 | 0.658385 | 1 RP11-247I13.11 | -      |
| ENSG00000241313 | 0.980265 | -1.616597 | 0.658385 | 1 WWTR1-AS1      | -      |
| ENSG00000241975 | 0.980265 | -1.616597 | 0.658385 | 1 TCEB1P19       | K03872 |
| ENSG00000242325 | 0.980265 | -1.616597 | 0.658385 | 1 RPS12P31       | -      |
| ENSG00000242775 | 0.980265 | -1.616597 | 0.658385 | 1 RP11-875H7.2   | -      |
| ENSG00000242791 | 0.980265 | -1.616597 | 0.658385 | 1 RP11-651P23.5  | -      |
| ENSG00000244515 | 0.980265 | -1.616597 | 0.658385 | 1 KRT18P34       | K07604 |
| ENSG00000245498 | 0.980265 | -1.616597 | 0.658385 | 1 RP11-677M14.7  | -      |
| ENSG00000249850 | 0.980265 | -1.616597 | 0.658385 | 1 KRT18P31       | K07604 |
| ENSG00000250284 | 0.980265 | -1.616597 | 0.658385 | 1 CTB-1I21.1     | -      |
| ENSG00000250659 | 0.980265 | -1.616597 | 0.658385 | 1 RP11-864I4.3   | -      |
| ENSG00000250822 | 0.980265 | -1.616597 | 0.658385 | 1 CTD-2139B15.4  | -      |
| ENSG00000250999 | 0.980265 | -1.616597 | 0.658385 | 1 RP11-1379J22.5 | -      |
| ENSG00000251013 | 0.980265 | -1.616597 | 0.658385 | 1 GAPDHP62       | K00134 |

|                 |          |           |          |                  |        |
|-----------------|----------|-----------|----------|------------------|--------|
| ENSG00000251459 | 0.980265 | -1.616597 | 0.658385 | 1 RP11-319E12.2  | --     |
| ENSG00000252071 | 0.980265 | -1.616597 | 0.658385 | 1 snoU13         | --     |
| ENSG00000253270 | 0.980265 | -1.616597 | 0.658385 | 1 RP11-1105O14.1 | --     |
| ENSG00000253395 | 0.980265 | -1.616597 | 0.658385 | 1 KB-1460A1.1    | --     |
| ENSG00000253552 | 0.980265 | -1.616597 | 0.658385 | 1 HOXA-AS2       | --     |
| ENSG00000253731 | 0.980265 | -1.616597 | 0.658385 | 1 PCDHGA6        | K16495 |
| ENSG00000254231 | 0.980265 | -1.616597 | 0.658385 | 1 CTD-2284J15.1  | --     |
| ENSG00000254397 | 0.980265 | -1.616597 | 0.658385 | 1 CTD-2371O3.2   | --     |
| ENSG00000254449 | 0.980265 | -1.616597 | 0.658385 | 1 SF3A3P2        | K12827 |
| ENSG00000254459 | 0.980265 | -1.616597 | 0.658385 | 1 RP11-91P24.7   | --     |
| ENSG00000254593 | 0.980265 | -1.616597 | 0.658385 | 1 OR7E126P       | K04257 |
| ENSG00000254842 | 0.980265 | -1.616597 | 0.658385 | 1 RP11-890B15.2  | --     |
| ENSG00000255036 | 0.980265 | -1.616597 | 0.658385 | 1 RP11-23J9.4    | --     |
| ENSG00000255153 | 0.980265 | -1.616597 | 0.658385 | 1 TOLLIP-AS1     | --     |
| ENSG00000255471 | 0.980265 | -1.616597 | 0.658385 | 1 RP11-736K20.5  | --     |
| ENSG00000255989 | 0.980265 | -1.616597 | 0.658385 | 1 RP11-711M9.1   | --     |
| ENSG00000257243 | 0.980265 | -1.616597 | 0.658385 | 1 RP11-133N21.7  | K05687 |
| ENSG00000257830 | 0.980265 | -1.616597 | 0.658385 | 1 RP11-845M18.7  | --     |
| ENSG00000258581 | 0.980265 | -1.616597 | 0.658385 | 1 RP11-638I2.10  | K03959 |
| ENSG00000258667 | 0.980265 | -1.616597 | 0.658385 | 1 HIF1A-AS2      | --     |
| ENSG00000258957 | 0.980265 | -1.616597 | 0.658385 | 1 RP11-363J20.1  | --     |
| ENSG00000259020 | 0.980265 | -1.616597 | 0.658385 | 1 RP11-529H20.3  | K13784 |
| ENSG00000259088 | 0.980265 | -1.616597 | 0.658385 | 1 CTD-2017C7.2   | --     |
| ENSG00000259264 | 0.980265 | -1.616597 | 0.658385 | 1 RP11-60L3.1    | --     |
| ENSG00000259771 | 0.980265 | -1.616597 | 0.658385 | 1 RP11-429D19.1  | --     |
| ENSG00000259921 | 0.980265 | -1.616597 | 0.658385 | 1 AC022819.3     | --     |
| ENSG00000260022 | 0.980265 | -1.616597 | 0.658385 | 1 LA16c-306A4.1  | --     |
| ENSG00000260837 | 0.980265 | -1.616597 | 0.658385 | 1 RP11-434B12.1  | --     |
| ENSG00000260977 | 0.980265 | -1.616597 | 0.658385 | 1 RP11-333I13.1  | --     |
| ENSG00000261574 | 0.980265 | -1.616597 | 0.658385 | 1 RP1-168P16.2   | --     |
| ENSG00000261634 | 0.980265 | -1.616597 | 0.658385 | 1 RP11-352D13.6  | --     |
| ENSG00000262094 | 0.980265 | -1.616597 | 0.658385 | 1 AC139099.5     | --     |
| ENSG00000262772 | 0.980265 | -1.616597 | 0.658385 | 1 RP11-353N14.2  | --     |
| ENSG00000264304 | 0.980265 | -1.616597 | 0.658385 | 1 RP11-20B24.7   | --     |
| ENSG00000265625 | 0.980265 | -1.616597 | 0.658385 | 1 RP11-68I3.11   | --     |
| ENSG00000265702 | 0.980265 | -1.616597 | 0.658385 | 1 RP11-156L14.1  | --     |
| ENSG00000266236 | 0.980265 | -1.616597 | 0.658385 | 1 NARF-IT1       | --     |
| ENSG00000267255 | 0.980265 | -1.616597 | 0.658385 | 1 CTB-50L17.5    | --     |
| ENSG00000267811 | 0.980265 | -1.616597 | 0.658385 | 1 RP11-727F15.11 | --     |
| ENSG00000268678 | 0.980265 | -1.616597 | 0.658385 | 1 CTC-444N24.13  | --     |
| ENSG00000269487 | 0.980265 | -1.616597 | 0.658385 | 1 CTB-174O21.2   | --     |
| ENSG00000269737 | 0.980265 | -1.616597 | 0.658385 | 1 RP11-345P4.7   | --     |
| ENSG00000270048 | 0.980265 | -1.616597 | 0.658385 | 1 RP11-214K3.22  | --     |
| ENSG00000270104 | 0.980265 | -1.616597 | 0.658385 | 1 RP11-245P10.6  | --     |
| ENSG00000270926 | 0.980265 | -1.616597 | 0.658385 | 1 RP11-551L14.7  | K18461 |
| ENSG00000271327 | 0.980265 | -1.616597 | 0.658385 | 1 RP11-1109F11.3 | --     |
| ENSG00000271553 | 0.980265 | -1.616597 | 0.658385 | 1 RP11-274B21.10 | --     |
| ENSG00000271741 | 0.980265 | -1.616597 | 0.658385 | 1 RP11-244H3.4   | --     |
| ENSG00000272606 | 0.980265 | -1.616597 | 0.658385 | 1 RP11-554J4.1   | --     |
| ENSG00000272662 | 0.980265 | -1.616597 | 0.658385 | 1 RP11-190C22.8  | --     |
| ENSG00000272836 | 0.980265 | -1.616597 | 0.658385 | 1 RP3-402G11.27  | --     |
| ENSG00000272918 | 0.980265 | -1.616597 | 0.658385 | 1 CTB-152G17.6   | --     |
| ENSG00000272945 | 0.980265 | -1.616597 | 0.658385 | 1 CTD-3216D2.5   | --     |
| ENSG00000272948 | 0.980265 | -1.616597 | 0.658385 | 1 AP001412.1     | --     |
| ENSG00000273075 | 0.980265 | -1.616597 | 0.658385 | 1 RP11-122G18.8  | --     |
| ENSG00000273381 | 0.980265 | -1.616597 | 0.658385 | 1 RP11-305L7.7   | --     |
| ENSG00000150459 | 0.291199 | 6.763112  | 0.658567 | 1 SAP18          | K14324 |
| ENSG00000067225 | 0.289035 | 10.80052  | 0.658602 | 1 PKM            | K00873 |



|                 |           |          |          |                  |        |
|-----------------|-----------|----------|----------|------------------|--------|
| ENSG00000178177 | 0.305549  | 4.082017 | 0.658635 | 1 LCORL          | -      |
| ENSG00000198840 | -0.28933  | 9.094036 | 0.658669 | 1 MT-ND3         | K03880 |
| ENSG00000118197 | -0.297492 | 5.150873 | 0.65868  | 1 DDX59          | K19466 |
| ENSG00000107738 | -0.30783  | 3.850645 | 0.658739 | 1 C10orf54       | -      |
| ENSG00000238072 | -0.30783  | 3.850645 | 0.658739 | 1 RP11-305M3.2   | K03359 |
| ENSG00000178567 | -0.303498 | 3.762933 | 0.658781 | 1 EPM2AIP1       | -      |
| ENSG00000147853 | -0.295809 | 4.797846 | 0.658879 | 1 AK3            | K00944 |
| ENSG00000246263 | -0.312056 | 3.458725 | 0.658934 | 1 KB-431C1.4     | -      |
| ENSG00000232098 | -0.314443 | 3.346903 | 0.658997 | 1 CTD-2619J13.14 | -      |
| ENSG00000007237 | -0.444469 | 1.260492 | 0.659012 | 1 GAS7           | K18618 |
| ENSG00000256185 | -0.444469 | 1.260492 | 0.659012 | 1 RP11-612B6.2   | -      |
| ENSG00000100918 | -0.409844 | 1.239803 | 0.659012 | 1 REC8           | K13054 |
| ENSG00000130653 | -0.409844 | 1.239803 | 0.659012 | 1 PNPLA7         | K14676 |
| ENSG00000175764 | 0.359131  | 1.209238 | 0.659012 | 1 TTLL11         | K16604 |
| ENSG00000204954 | -0.302261 | 4.50176  | 0.659084 | 1 C12orf73       | -      |
| ENSG00000167842 | -0.292918 | 5.804739 | 0.659153 | 1 MIS12          | -      |
| ENSG00000164168 | -0.3028   | 4.325086 | 0.659223 | 1 TMEM184C       | -      |
| ENSG00000250571 | -0.3028   | 4.325086 | 0.659223 | 1 GLI4           | -      |
| ENSG00000146373 | -0.299821 | 4.82129  | 0.65935  | 1 RNF217         | K11977 |
| ENSG00000174021 | -0.289593 | 7.59084  | 0.659378 | 1 GNG5           | K04542 |
| ENSG00000121989 | -0.339021 | 2.536101 | 0.659432 | 1 ACVR2A         | K04670 |
| ENSG00000205309 | -0.339021 | 2.536101 | 0.659432 | 1 NT5M           | K01081 |
| ENSG00000125637 | 0.335652  | 2.520894 | 0.659432 | 1 PSD4           | K12494 |
| ENSG00000148158 | -0.304526 | 4.05421  | 0.659471 | 1 SNX30          | K17921 |
| ENSG00000170836 | 0.30172   | 4.045301 | 0.659471 | 1 PPM1D          | K10147 |
| ENSG00000135482 | -0.348653 | 2.316029 | 0.65953  | 1 ZC3H10         | -      |
| ENSG00000260329 | 0.353204  | 1.673282 | 0.659535 | 1 RP11-412D9.4   | -      |
| ENSG00000124224 | 0.349916  | 2.024442 | 0.659596 | 1 PPP4R1L        | K15424 |
| ENSG00000092208 | -0.301527 | 4.420218 | 0.659788 | 1 GEMIN2         | K13130 |
| ENSG00000175662 | 0.300245  | 4.414057 | 0.659788 | 1 TOM1L2         | -      |
| ENSG00000167632 | 0.299472  | 4.797101 | 0.659862 | 1 TRAPPC9        | -      |
| ENSG00000198324 | -0.308792 | 3.627747 | 0.659953 | 1 FAM109A        | -      |
| ENSG00000132142 | 0.28979   | 6.060977 | 0.659987 | 1 ACACA          | K11262 |
| ENSG00000272520 | 0.30347   | 4.227407 | 0.660031 | 1 CTD-2044J15.2  | -      |
| ENSG00000111652 | -0.293991 | 5.656324 | 0.660105 | 1 COPS7A         | K12180 |
| ENSG00000071205 | -0.302874 | 4.168239 | 0.660126 | 1 ARHGAP10       | K13736 |
| ENSG00000110063 | 0.291649  | 5.470203 | 0.660397 | 1 DCPS           | K12584 |
| ENSG00000105063 | 0.28922   | 6.932298 | 0.66047  | 1 PPP6R1         | K15499 |
| ENSG00000109436 | 0.292534  | 4.969603 | 0.660526 | 1 TBC1D9         | -      |
| ENSG00000148516 | 0.290267  | 5.566011 | 0.66053  | 1 ZEB1           | K09299 |
| ENSG00000163214 | -0.29466  | 4.933029 | 0.660598 | 1 DHX57          | K13026 |
| ENSG00000163636 | -0.289721 | 6.648804 | 0.660656 | 1 PSMD6          | K03037 |
| ENSG00000075426 | 0.288127  | 7.66929  | 0.660787 | 1 FOSL2          | K09030 |
| ENSG00000164051 | -0.291405 | 5.557487 | 0.660844 | 1 CCDC51         | -      |
| ENSG00000232573 | 0.287749  | 7.981202 | 0.660946 | 1 RPL3P4         | K02925 |
| ENSG00000096092 | -0.294711 | 5.342245 | 0.660967 | 1 TMEM14A        | -      |
| ENSG00000090776 | -0.306358 | 3.577201 | 0.661151 | 1 EFNB1          | K05463 |
| ENSG00000105556 | 0.297037  | 4.361651 | 0.661184 | 1 MIER2          | -      |
| ENSG00000112667 | -0.290251 | 6.150715 | 0.661228 | 1 DNPH1          | -      |
| ENSG00000138190 | -0.303076 | 4.305283 | 0.661322 | 1 EXOC6          | K09228 |
| ENSG00000087077 | -0.288213 | 7.179012 | 0.661409 | 1 TRIP6          | K12792 |
| ENSG00000005302 | -0.294073 | 5.297285 | 0.661413 | 1 MSL3           | K18403 |
| ENSG00000196458 | 0.311919  | 2.638918 | 0.661501 | 1 ZNF605         | K09228 |
| ENSG00000163686 | 0.299282  | 4.688902 | 0.661603 | 1 ABHD6          | K13700 |
| ENSG00000143401 | -0.308447 | 4.103505 | 0.661813 | 1 ANP32E         | K18648 |
| ENSG00000006282 | -0.291474 | 5.393159 | 0.66185  | 1 SPATA20        | K06888 |
| ENSG00000085382 | -0.303925 | 3.733592 | 0.661878 | 1 HACE1          | K12166 |
| ENSG00000092969 | -0.297931 | 3.730212 | 0.661878 | 1 TGFB2          | K13376 |

|                 |           |          |          |                 |        |
|-----------------|-----------|----------|----------|-----------------|--------|
| ENSG00000160305 | 0.291393  | 5.328771 | 0.662016 | 1 DIP2A         | K17985 |
| ENSG00000163904 | -0.291303 | 5.838811 | 0.662017 | 1 SENP2         | K03345 |
| ENSG00000075914 | -0.293701 | 5.056622 | 0.662035 | 1 EXOSC7        | K17520 |
| ENSG00000239213 | 0.30428   | 3.629009 | 0.662135 | 1 RP11-85F14.5  | -      |
| ENSG00000144036 | -0.293971 | 5.020643 | 0.662142 | 1 EXOC6B        | -      |
| ENSG00000132256 | -0.302282 | 4.211441 | 0.662283 | 1 TRIM5         | K10648 |
| ENSG00000162300 | 0.313113  | 3.078484 | 0.662318 | 1 ZFPL1         | -      |
| ENSG00000227467 | -0.311243 | 3.087942 | 0.662318 | 1 RP11-169D4.1  | -      |
| ENSG00000187051 | -0.28876  | 6.368853 | 0.66244  | 1 RPS19BP1      | -      |
| ENSG00000151657 | -0.300231 | 4.372365 | 0.662497 | 1 KIN           | K13102 |
| ENSG00000143390 | -0.287848 | 6.735624 | 0.662547 | 1 RFX5          | K08061 |
| ENSG00000165678 | -0.286119 | 8.326247 | 0.662598 | 1 GHITM         | -      |
| ENSG00000145725 | -0.617259 | 0.193598 | 0.662736 | 1 PPIP5K2       | K13024 |
| ENSG00000177455 | -0.617259 | 0.193598 | 0.662736 | 1 CD19          | K06465 |
| ENSG00000227039 | -0.617259 | 0.193598 | 0.662736 | 1 ITGB2-AS1     | -      |
| ENSG00000229160 | -0.617259 | 0.193598 | 0.662736 | 1 AC009229.6    | -      |
| ENSG00000235217 | -0.617259 | 0.193598 | 0.662736 | 1 TSPY26P       | K11286 |
| ENSG00000237004 | -0.617259 | 0.193598 | 0.662736 | 1 ZNRF2P1       | K10694 |
| ENSG00000247373 | -0.617259 | 0.193598 | 0.662736 | 1 RP11-486O12.2 | -      |
| ENSG00000267041 | -0.617259 | 0.193598 | 0.662736 | 1 ZNF850        | K09228 |
| ENSG00000267152 | -0.617259 | 0.193598 | 0.662736 | 1 CTD-2528L19.6 | -      |
| ENSG00000105647 | -0.539959 | 0.147545 | 0.662736 | 1 PIK3R2        | K02649 |
| ENSG00000126231 | -0.539959 | 0.147545 | 0.662736 | 1 PROZ          | -      |
| ENSG00000169085 | -0.539959 | 0.147545 | 0.662736 | 1 C8orf46       | -      |
| ENSG00000226763 | -0.539959 | 0.147545 | 0.662736 | 1 SRRM5         | K02914 |
| ENSG00000228315 | -0.539959 | 0.147545 | 0.662736 | 1 GUSBP11       | -      |
| ENSG00000247853 | -0.539959 | 0.147545 | 0.662736 | 1 RP5-940J5.6   | -      |
| ENSG00000256427 | -0.539959 | 0.147545 | 0.662736 | 1 RP11-118B22.4 | -      |
| ENSG00000260464 | -0.539959 | 0.147545 | 0.662736 | 1 RP4-561L24.3  | -      |
| ENSG00000262587 | -0.539959 | 0.147545 | 0.662736 | 1 RP11-266L9.4  | -      |
| ENSG00000108551 | 0.502876  | 0.097717 | 0.662736 | 1 RASD1         | K07843 |
| ENSG00000138152 | 0.502876  | 0.097717 | 0.662736 | 1 BTBD16        | K10487 |
| ENSG00000144278 | 0.502876  | 0.097717 | 0.662736 | 1 GALNT13       | K00710 |
| ENSG00000160963 | 0.502876  | 0.097717 | 0.662736 | 1 COL26A1       | -      |
| ENSG00000162290 | 0.502876  | 0.097717 | 0.662736 | 1 DCP1A         | K12610 |
| ENSG00000171045 | 0.502876  | 0.097717 | 0.662736 | 1 TSNARE1       | K13814 |
| ENSG00000177675 | 0.502876  | 0.097717 | 0.662736 | 1 CD163L1       | K06545 |
| ENSG00000178460 | 0.502876  | 0.097717 | 0.662736 | 1 MCMDC2        | K11447 |
| ENSG00000183638 | 0.502876  | 0.097717 | 0.662736 | 1 RP1L1         | K19538 |
| ENSG00000213025 | 0.502876  | 0.097717 | 0.662736 | 1 COX20P1       | K18184 |
| ENSG00000216588 | 0.502876  | 0.097717 | 0.662736 | 1 IGSF23        | -      |
| ENSG00000261879 | 0.502876  | 0.097717 | 0.662736 | 1 RP11-333E1.1  | -      |
| ENSG00000157077 | 0.29662   | 4.645715 | 0.66281  | 1 ZFYVE9        | K04679 |
| ENSG00000155256 | 0.29156   | 5.237438 | 0.663014 | 1 ZFYVE27       | K19368 |
| ENSG00000136450 | -0.285935 | 8.018994 | 0.663022 | 1 SRSF1         | K12890 |
| ENSG00000164144 | -0.297777 | 4.881961 | 0.663028 | 1 ARFIP1        | -      |
| ENSG00000103061 | 0.309272  | 3.677767 | 0.663048 | 1 SLC7A6OS      | -      |
| ENSG00000066117 | -0.287691 | 6.54147  | 0.66312  | 1 SMARCD1       | K11650 |
| ENSG00000187498 | 0.2865    | 7.174356 | 0.66313  | 1 COL4A1        | K06237 |
| ENSG00000135900 | -0.289764 | 5.719201 | 0.66316  | 1 MRPL44        | K17425 |
| ENSG00000171204 | -0.289461 | 6.202187 | 0.663177 | 1 TMEM126B      | K18165 |
| ENSG00000153214 | -0.292962 | 4.796259 | 0.66334  | 1 TMEM87B       | -      |
| ENSG00000107372 | -0.286069 | 7.51099  | 0.663355 | 1 ZFAND5        | -      |
| ENSG00000112941 | 0.286495  | 6.972706 | 0.663416 | 1 PAPD7         | K03514 |
| ENSG00000175756 | -0.286976 | 6.782531 | 0.663419 | 1 AURKAIP1      | K16830 |
| ENSG00000102531 | -0.286535 | 6.954476 | 0.663604 | 1 FNDC3A        | -      |
| ENSG00000104093 | 0.293531  | 4.963984 | 0.663618 | 1 DMXL2         | -      |
| ENSG00000102226 | -0.28955  | 5.401472 | 0.663787 | 1 USP11         | K11835 |

|                 |           |          |          |   |               |         |
|-----------------|-----------|----------|----------|---|---------------|---------|
| ENSG00000186470 | -0.289122 | 6.280338 | 0.663793 | 1 | BTN3A2        | K06712  |
| ENSG00000163923 | -0.288432 | 5.672734 | 0.663869 | 1 | RPL39L        | K02924  |
| ENSG00000106366 | -0.291664 | 4.774013 | 0.663918 | 1 | SERPINE1      | K03982  |
| ENSG00000176092 | -0.355699 | 1.524185 | 0.663922 | 1 | AIM1L         | -       |
| ENSG00000100246 | -0.330906 | 2.5658   | 0.663944 | 1 | DNAL4         | K10412  |
| ENSG00000249673 | -0.330906 | 2.5658   | 0.663944 | 1 | NOP14-AS1     | -       |
| ENSG00000070413 | -0.290813 | 5.340082 | 0.664034 | 1 | DGCR2         | -       |
| ENSG00000135185 | -0.290813 | 5.340082 | 0.664034 | 1 | TMEM243       | -       |
| ENSG00000230989 | -0.286822 | 6.549444 | 0.664061 | 1 | HSBP1         | K19765  |
| ENSG00000167964 | 0.289304  | 5.68431  | 0.664083 | 1 | RAB26         | K07913  |
| ENSG00000100297 | 0.285493  | 7.259643 | 0.664134 | 1 | MCM5          | K15696  |
| ENSG00000126464 | 0.289773  | 5.122392 | 0.664616 | 1 | PRR12         | -       |
| ENSG00000264608 | 0.423524  | 0.95908  | 0.66464  | 1 | RP11-192H23.8 | -       |
| ENSG00000047230 | -0.290544 | 5.561203 | 0.664641 | 1 | CTPS2         | K01937  |
| ENSG00000165672 | -0.284089 | 8.412208 | 0.664792 | 1 | PRDX3         | K03386  |
| ENSG00000152818 | -0.289195 | 4.993388 | 0.664819 | 1 | UTRN          | -       |
| ENSG00000106571 | -0.310622 | 2.859248 | 0.664839 | 1 | GLI3          | K06230  |
| ENSG00000262814 | -0.286104 | 6.488804 | 0.664988 | 1 | MRPL12        | K02935  |
| ENSG00000186205 | -0.285888 | 6.59456  | 0.664994 | 1 |               | 1-Mar - |
| ENSG00000160199 | 0.297405  | 3.914636 | 0.665017 | 1 | PKNOX1        | -       |
| ENSG00000110002 | -0.290096 | 5.479135 | 0.665027 | 1 | VWA5A         | -       |
| ENSG00000058729 | -0.28929  | 5.653719 | 0.665049 | 1 | RIOK2         | K07179  |
| ENSG00000173171 | -0.292173 | 5.108325 | 0.665091 | 1 | MTX1          | K17776  |
| ENSG00000136560 | -0.292794 | 5.013878 | 0.665146 | 1 | TANK          | K12650  |
| ENSG00000131408 | 0.286561  | 6.244183 | 0.665213 | 1 | NR1H2         | K08535  |
| ENSG00000142599 | 0.289456  | 4.971012 | 0.665341 | 1 | RERE          | K05628  |
| ENSG00000170234 | -0.291097 | 4.871502 | 0.66542  | 1 | PWWP2A        | -       |
| ENSG00000146247 | -0.285334 | 6.683322 | 0.665423 | 1 | PHIP          | K11797  |
| ENSG00000248333 | 0.294892  | 4.553373 | 0.665462 | 1 | CDK11B        | K08818  |
| ENSG00000183354 | 0.298087  | 4.150434 | 0.665523 | 1 | KIAA2026      | -       |
| ENSG00000066739 | 0.304347  | 3.589448 | 0.665612 | 1 | ATG2B         | K17906  |
| ENSG00000157107 | -0.29081  | 5.147158 | 0.66568  | 1 | FCHO2         | -       |
| ENSG00000152795 | -0.283144 | 8.686957 | 0.665688 | 1 | HNRNPDL       | K13044  |
| ENSG00000102882 | 0.286845  | 5.564155 | 0.665785 | 1 | MAPK3         | K04371  |
| ENSG00000112578 | -0.285738 | 5.856313 | 0.665789 | 1 | BYSL          | K14797  |
| ENSG00000146648 | -0.28411  | 7.199736 | 0.665912 | 1 | EGFR          | K04361  |
| ENSG00000198682 | 0.283376  | 7.656263 | 0.666054 | 1 | PAPSS2        | K13811  |
| ENSG00000166352 | -0.324741 | 2.947538 | 0.666205 | 1 | C11orf74      | -       |
| ENSG00000170684 | -0.324741 | 2.947538 | 0.666205 | 1 | ZNF296        | K17576  |
| ENSG00000110844 | 0.318551  | 2.936603 | 0.666205 | 1 | PRPF40B       | K12821  |
| ENSG00000144591 | 0.28623   | 5.631252 | 0.666262 | 1 | GMPPA         | K00966  |
| ENSG00000168958 | 0.283862  | 6.925428 | 0.666397 | 1 | MFF           | -       |
| ENSG00000138767 | -0.295411 | 4.480291 | 0.666494 | 1 | CNOT6L        | K12603  |
| ENSG00000180354 | 0.301684  | 3.790013 | 0.666616 | 1 | MTURN         | K08051  |
| ENSG00000135749 | 0.319444  | 2.443049 | 0.666715 | 1 | PCNXL2        | -       |
| ENSG00000211460 | -0.283657 | 6.982813 | 0.666738 | 1 | TSN           | K17934  |
| ENSG00000108379 | -0.305958 | 3.380807 | 0.666825 | 1 | WNT3          | K00312  |
| ENSG00000131174 | 0.291176  | 4.418232 | 0.666833 | 1 | COX7B         | K02271  |
| ENSG00000162923 | 0.283317  | 7.023531 | 0.666855 | 1 | WDR26         | -       |
| ENSG00000152240 | -0.291173 | 4.857972 | 0.666926 | 1 | HAUS1         | K16584  |
| ENSG00000130299 | -0.285109 | 5.818008 | 0.666986 | 1 | GTPBP3        | K03650  |
| ENSG00000130475 | -0.292847 | 4.589838 | 0.667004 | 1 | FCHO1         | -       |
| ENSG00000135211 | -0.288882 | 4.743257 | 0.66714  | 1 | TMEM60        | -       |
| ENSG00000109265 | 0.315925  | 2.760224 | 0.667152 | 1 | KIAA1211      | -       |
| ENSG00000272631 | 0.372093  | 1.71278  | 0.66739  | 1 | RP11-359E3.4  | -       |
| ENSG00000082805 | 0.285378  | 5.967919 | 0.667408 | 1 | ERC1          | K16072  |
| ENSG00000134779 | -0.285464 | 6.011018 | 0.667573 | 1 | TPGS2         | K16605  |
| ENSG00000176248 | -0.287619 | 5.418981 | 0.667597 | 1 | ANAPC2        | K03349  |

|                 |           |           |          |               |        |
|-----------------|-----------|-----------|----------|---------------|--------|
| ENSG00000171103 | -0.28725  | 4.793081  | 0.667825 | 1 TRMT61B     | K08694 |
| ENSG00000133731 | -0.284296 | 5.941453  | 0.667826 | 1 IMPA1       | K01092 |
| ENSG00000137492 | -0.284825 | 6.031921  | 0.667858 | 1 PRKRIR      | -      |
| ENSG00000146731 | -0.281025 | 9.090556  | 0.667865 | 1 CCT6A       | K09498 |
| ENSG00000175283 | -0.296557 | 4.131158  | 0.668001 | 1 DOLK        | K00902 |
| ENSG00000126457 | -0.281734 | 7.5021    | 0.668164 | 1 PRMT1       | K11434 |
| ENSG00000119812 | -0.283025 | 6.570347  | 0.668208 | 1 FAM98A      | -      |
| ENSG00000169696 | 0.285509  | 5.505431  | 0.668231 | 1 ASPSCR1     | K15627 |
| ENSG00000137500 | -0.28553  | 5.550029  | 0.668235 | 1 CCDC90B     | K04257 |
| ENSG00000125351 | -0.285527 | 5.973869  | 0.668265 | 1 UPF3B       | K14328 |
| ENSG00000134146 | -0.323134 | 2.594908  | 0.668342 | 1 DPH6        | K06927 |
| ENSG00000163558 | -0.282349 | 6.855091  | 0.668402 | 1 PRKCI       | K06069 |
| ENSG00000145293 | 0.283759  | 6.041763  | 0.668404 | 1 ENOPH1      | K09880 |
| ENSG00000143155 | -0.285574 | 5.524564  | 0.668427 | 1 TIPRL       | K17607 |
| ENSG00000189339 | 0.29292   | 4.454719  | 0.668488 | 1 SLC35E2B    | K15284 |
| ENSG00000118965 | -0.292461 | 4.059354  | 0.668511 | 1 WDR35       | K19674 |
| ENSG00000212978 | -0.302919 | 3.320597  | 0.668514 | 1 AC016747.3  | -      |
| ENSG00000259943 | 0.298753  | 3.49539   | 0.668522 | 1 RP1-39G22.7 | -      |
| ENSG00000234327 | 0.306819  | 3.653593  | 0.668523 | 1 AC012146.7  | -      |
| ENSG00000197912 | 0.282524  | 6.463552  | 0.668713 | 1 SPG7        | K09552 |
| ENSG00000134825 | -0.285885 | 5.779454  | 0.668741 | 1 TMEM258     | -      |
| ENSG00000177125 | 0.292759  | 4.647487  | 0.668831 | 1 ZBTB34      | K10508 |
| ENSG00000140848 | -0.29296  | 4.573373  | 0.668855 | 1 CPNE2       | K11341 |
| ENSG00000083168 | 0.290261  | 4.300631  | 0.668946 | 1 KAT6A       | K11305 |
| ENSG00000260027 | -0.288946 | 4.307388  | 0.668946 | 1 HOXB7       | K09307 |
| ENSG00000083845 | 0.279767  | 9.766383  | 0.669031 | 1 RPS5        | K02989 |
| ENSG00000124541 | -0.283603 | 6.066972  | 0.669071 | 1 RRP36       | K14572 |
| ENSG00000187866 | 0.291087  | 4.595774  | 0.669213 | 1 FAM122A     | -      |
| ENSG00000177082 | -0.289862 | 4.520894  | 0.66926  | 1 WDR73       | K06115 |
| ENSG00000162222 | 0.287236  | 5.3145    | 0.669333 | 1 TTC9C       | -      |
| ENSG00000132394 | -0.294716 | 4.340244  | 0.669372 | 1 EEFSEC      | K03833 |
| ENSG00000129255 | -0.283524 | 6.289901  | 0.669426 | 1 MPDU1       | K09660 |
| ENSG00000133863 | -0.284399 | 4.777182  | 0.669444 | 1 TEX15       | -      |
| ENSG00000183793 | -0.385662 | 1.311362  | 0.669495 | 1 NPIPA5      | K01896 |
| ENSG00000213020 | 0.385075  | 1.262982  | 0.669495 | 1 ZNF611      | K09228 |
| ENSG00000071967 | 0.282413  | 5.977005  | 0.669542 | 1 CYBRD1      | K08370 |
| ENSG00000196187 | 0.286601  | 5.330958  | 0.669543 | 1 TMEM63A     | -      |
| ENSG00000108819 | 0.281805  | 6.437947  | 0.669563 | 1 PPP1R9B     | K17551 |
| ENSG00000170348 | 0.279992  | 7.904425  | 0.669596 | 1 TMED10      | -      |
| ENSG00000095397 | 0.289289  | 4.542141  | 0.669623 | 1 DFNB31      | -      |
| ENSG00000133302 | 0.281127  | 6.783946  | 0.669654 | 1 ANKRD32     | -      |
| ENSG00000121211 | -0.288389 | 4.869996  | 0.669683 | 1 MND1        | -      |
| ENSG00000143363 | -0.283927 | 5.398357  | 0.669705 | 1 PRUNE       | K01514 |
| ENSG00000231607 | -0.326724 | 2.693287  | 0.669732 | 1 DLEU2       | -      |
| ENSG00000101150 | -0.280249 | 7.521784  | 0.669789 | 1 TPD52L2     | -      |
| ENSG00000215251 | 0.284193  | 5.455269  | 0.669853 | 1 FASTKD5     | -      |
| ENSG00000245849 | 0.320619  | 2.35156   | 0.669885 | 1 RAD51-AS1   | -      |
| ENSG00000114767 | -0.289358 | 4.955775  | 0.669895 | 1 RRP9        | K14793 |
| ENSG00000132635 | -0.285209 | 5.149619  | 0.669956 | 1 PCED1A      | -      |
| ENSG00000087470 | -0.280013 | 7.405698  | 0.670184 | 1 DNM1L       | K17065 |
| ENSG00000144867 | -0.281024 | 6.624183  | 0.670309 | 1 SRPRB       | K12272 |
| ENSG00000104331 | 0.279661  | 7.500301  | 0.670326 | 1 IMPAD1      | K15759 |
| ENSG00000144061 | -0.818653 | -0.489463 | 0.670342 | 1 NPHP1       | K19657 |
| ENSG00000197748 | -0.818653 | -0.489463 | 0.670342 | 1 WDR96       | -      |
| ENSG00000205572 | -0.818653 | -0.489463 | 0.670342 | 1 SERF1B      | -      |
| ENSG00000228363 | -0.818653 | -0.489463 | 0.670342 | 1 AC015971.2  | -      |
| ENSG00000231360 | -0.818653 | -0.489463 | 0.670342 | 1 AL592284.1  | K15258 |
| ENSG00000243251 | -0.818653 | -0.489463 | 0.670342 | 1 PGBD3       | K10841 |

|                 |           |           |          |                  |        |
|-----------------|-----------|-----------|----------|------------------|--------|
| ENSG00000245711 | -0.818653 | -0.489463 | 0.670342 | 1 NADK2-AS1      | -      |
| ENSG00000260655 | -0.818653 | -0.489463 | 0.670342 | 1 CTA-250D10.23  | -      |
| ENSG00000265243 | -0.818653 | -0.489463 | 0.670342 | 1 IGLJCOR18      | K06554 |
| ENSG00000272140 | -0.818653 | -0.489463 | 0.670342 | 1 RP11-574K11.29 | -      |
| ENSG00000073009 | 0.801779  | -0.512045 | 0.670342 | 1 IKBKG          | K07210 |
| ENSG00000104901 | 0.801779  | -0.512045 | 0.670342 | 1 DKKL1          | -      |
| ENSG00000105146 | 0.801779  | -0.512045 | 0.670342 | 1 AURKC          | K11480 |
| ENSG00000124251 | 0.801779  | -0.512045 | 0.670342 | 1 TP53TG5        | -      |
| ENSG00000125910 | 0.801779  | -0.512045 | 0.670342 | 1 S1PR4          | K04293 |
| ENSG00000126460 | 0.801779  | -0.512045 | 0.670342 | 1 PRRG2          | -      |
| ENSG00000134256 | 0.801779  | -0.512045 | 0.670342 | 1 CD101          | K06522 |
| ENSG00000151715 | 0.801779  | -0.512045 | 0.670342 | 1 TMMEM45B       | K17776 |
| ENSG00000169067 | 0.801779  | -0.512045 | 0.670342 | 1 ACTBL2         | K05692 |
| ENSG00000175229 | 0.801779  | -0.512045 | 0.670342 | 1 GAL3ST3        | K09676 |
| ENSG00000178430 | 0.801779  | -0.512045 | 0.670342 | 1 AC006111.1     | K12581 |
| ENSG00000186517 | 0.801779  | -0.512045 | 0.670342 | 1 ARHGAP30       | -      |
| ENSG00000196730 | 0.801779  | -0.512045 | 0.670342 | 1 DAPK1          | K08803 |
| ENSG00000203832 | 0.801779  | -0.512045 | 0.670342 | 1 NBPF20         | -      |
| ENSG00000213658 | 0.801779  | -0.512045 | 0.670342 | 1 LAT            | K07362 |
| ENSG00000214514 | 0.801779  | -0.512045 | 0.670342 | 1 KRT42P         | K07604 |
| ENSG00000225793 | 0.801779  | -0.512045 | 0.670342 | 1 RP1-234P15.4   | -      |
| ENSG00000225976 | 0.801779  | -0.512045 | 0.670342 | 1 RP11-192N10.2  | K02219 |
| ENSG00000229261 | 0.801779  | -0.512045 | 0.670342 | 1 RP11-227H15.4  | -      |
| ENSG00000235082 | 0.801779  | -0.512045 | 0.670342 | 1 SUMO1P3        | K12160 |
| ENSG00000240445 | 0.801779  | -0.512045 | 0.670342 | 1 FOXO3B         | K09408 |
| ENSG00000251000 | 0.801779  | -0.512045 | 0.670342 | 1 AC008592.3     | K00682 |
| ENSG00000253459 | 0.801779  | -0.512045 | 0.670342 | 1 AL139099.1     | K10348 |
| ENSG00000259321 | 0.801779  | -0.512045 | 0.670342 | 1 RP11-468E2.5   | -      |
| ENSG00000260747 | 0.801779  | -0.512045 | 0.670342 | 1 RP11-421N8.1   | K02127 |
| ENSG00000260872 | 0.801779  | -0.512045 | 0.670342 | 1 RP11-680G24.5  | -      |
| ENSG00000262692 | 0.801779  | -0.512045 | 0.670342 | 1 CTD-3195I5.3   | -      |
| ENSG00000266456 | 0.801779  | -0.512045 | 0.670342 | 1 RP11-806L2.2   | -      |
| ENSG00000268310 | 0.801779  | -0.512045 | 0.670342 | 1 AC087645.1     | K08731 |
| ENSG00000273017 | 0.801779  | -0.512045 | 0.670342 | 1 AP000240.9     | -      |
| ENSG00000166359 | 0.61337   | -0.435981 | 0.670342 | 1 WDR88          | K03231 |
| ENSG00000199804 | 0.61337   | -0.435981 | 0.670342 | 1 RNA5SP383      | -      |
| ENSG00000224550 | 0.61337   | -0.435981 | 0.670342 | 1 RP11-270C12.3  | K03948 |
| ENSG00000224728 | 0.61337   | -0.435981 | 0.670342 | 1 AC090945.1     | K00088 |
| ENSG00000225083 | 0.61337   | -0.435981 | 0.670342 | 1 GRTP1-AS1      | -      |
| ENSG00000231233 | 0.61337   | -0.435981 | 0.670342 | 1 CCDC147-AS1    | -      |
| ENSG00000232485 | 0.61337   | -0.435981 | 0.670342 | 1 AC098820.3     | -      |
| ENSG00000256894 | 0.61337   | -0.435981 | 0.670342 | 1 RP11-283G6.3   | -      |
| ENSG00000257489 | 0.61337   | -0.435981 | 0.670342 | 1 RP11-175P13.3  | K16580 |
| ENSG00000258384 | 0.61337   | -0.435981 | 0.670342 | 1 AC068831.6     | -      |
| ENSG00000260423 | 0.61337   | -0.435981 | 0.670342 | 1 RP13-735L24.1  | -      |
| ENSG00000265417 | 0.61337   | -0.435981 | 0.670342 | 1 RP11-288C17.1  | -      |
| ENSG00000267922 | 0.61337   | -0.435981 | 0.670342 | 1 AC007193.6     | -      |
| ENSG00000272842 | 0.61337   | -0.435981 | 0.670342 | 1 RP11-513M16.7  | -      |
| ENSG00000273008 | 0.61337   | -0.435981 | 0.670342 | 1 RP11-351D16.3  | -      |
| ENSG00000178057 | -0.283694 | 5.844931  | 0.670437 | 1 NDUFAF3        | K09008 |
| ENSG00000167645 | -0.281518 | 6.303834  | 0.670551 | 1 YIF1B          | K17985 |
| ENSG00000144560 | 0.286629  | 4.100235  | 0.670568 | 1 VGLL4          | -      |
| ENSG00000173992 | 0.288732  | 4.629881  | 0.670629 | 1 CCS            | K04569 |
| ENSG00000153310 | -0.279315 | 7.652271  | 0.670687 | 1 FAM49B         | -      |
| ENSG00000055147 | -0.297969 | 3.989414  | 0.670744 | 1 FAM114A2       | -      |
| ENSG00000148803 | -0.289703 | 4.554837  | 0.670755 | 1 FUOM           | K02431 |
| ENSG00000109756 | -0.2904   | 4.736707  | 0.670813 | 1 RAPGEF2        | K08018 |
| ENSG00000179085 | 0.28841   | 4.730894  | 0.670813 | 1 DPM3           | K09659 |

|                 |           |          |          |               |        |
|-----------------|-----------|----------|----------|---------------|--------|
| ENSG00000100439 | 0.291481  | 4.241503 | 0.670834 | 1 ABHD4       | K13698 |
| ENSG00000104983 | -0.300162 | 2.797198 | 0.670933 | 1 CCDC61      | K16755 |
| ENSG00000145569 | 0.281777  | 5.72804  | 0.670946 | 1 FAM105A     | -      |
| ENSG00000138614 | -0.285604 | 5.507335 | 0.670984 | 1 VWA9        | -      |
| ENSG00000134809 | -0.282103 | 5.479135 | 0.671235 | 1 TIMM10      | K17778 |
| ENSG00000160221 | -0.280191 | 6.607663 | 0.671266 | 1 C21orf33    | -      |
| ENSG00000254332 | -0.318981 | 2.489281 | 0.671374 | 1 GS1-44D20.1 | K10375 |
| ENSG00000059378 | -0.280897 | 5.815682 | 0.671434 | 1 PARP12      | K15259 |
| ENSG00000164967 | -0.289485 | 4.182667 | 0.671436 | 1 RPP25L      | K14525 |
| ENSG00000022976 | -0.293502 | 3.909977 | 0.671463 | 1 ZNF839      | -      |
| ENSG00000126001 | 0.28187   | 5.549226 | 0.671478 | 1 CEP250      | K16464 |
| ENSG00000214753 | 0.283368  | 5.448245 | 0.671496 | 1 HNRNPUL2    | -      |
| ENSG00000159063 | -0.281755 | 5.978051 | 0.671532 | 1 ALG8        | K03849 |
| ENSG00000176915 | -0.278506 | 7.580636 | 0.67166  | 1 ANKLE2      | -      |
| ENSG00000100664 | 0.278059  | 7.808753 | 0.67182  | 1 EIF5        | K03262 |
| ENSG00000233608 | -0.350197 | 2.097332 | 0.67196  | 1 TWIST2      | K09069 |
| ENSG00000168000 | 0.340585  | 2.067237 | 0.67196  | 1 BSCL2       | K19365 |
| ENSG00000187187 | 0.340585  | 2.067237 | 0.67196  | 1 ZNF546      | K09228 |
| ENSG00000177106 | -0.280162 | 6.37364  | 0.671961 | 1 EPS8L2      | K17277 |
| ENSG00000177283 | -0.315524 | 2.889289 | 0.671981 | 1 FZD8        | K02375 |
| ENSG00000143870 | 0.277404  | 8.359871 | 0.672169 | 1 PDIA6       | K09584 |
| ENSG00000092148 | 0.27934   | 6.446524 | 0.672275 | 1 HECTD1      | K12231 |
| ENSG00000111490 | -0.292435 | 4.387041 | 0.672319 | 1 TBC1D30     | -      |
| ENSG00000082458 | 0.289341  | 4.3808   | 0.672319 | 1 DLG3        | K12075 |
| ENSG00000113761 | -0.290376 | 3.997585 | 0.672398 | 1 ZNF346      | -      |
| ENSG00000143543 | -0.277257 | 8.322608 | 0.672432 | 1 JTB         | -      |
| ENSG00000105447 | -0.280775 | 5.736565 | 0.672445 | 1 GRWD1       | K14848 |
| ENSG00000067066 | -0.28677  | 4.967015 | 0.672452 | 1 SP100       | K15413 |
| ENSG00000137824 | 0.280738  | 5.313401 | 0.672477 | 1 RMDN3       | -      |
| ENSG00000008324 | -0.291876 | 4.15098  | 0.6725   | 1 SS18L2      | -      |
| ENSG00000183077 | 0.288474  | 4.284966 | 0.672582 | 1 AFMID       | K01432 |
| ENSG00000166436 | 0.32329   | 2.581123 | 0.67263  | 1 TRIM66      | K12032 |
| ENSG00000081307 | -0.280096 | 6.082574 | 0.672633 | 1 UBA5        | K12164 |
| ENSG00000002016 | -0.295309 | 3.683189 | 0.672653 | 1 RAD52       | K10873 |
| ENSG00000165730 | 0.359464  | 1.513935 | 0.672668 | 1 STOX1       | -      |
| ENSG00000187796 | 0.359464  | 1.513935 | 0.672668 | 1 CARD9       | K12794 |
| ENSG00000234498 | 0.359464  | 1.513935 | 0.672668 | 1 RPL13AP20   | K02872 |
| ENSG00000130204 | -0.277708 | 7.280865 | 0.672901 | 1 TOMM40      | K11518 |
| ENSG00000166913 | -0.276819 | 8.277448 | 0.672949 | 1 YWHAB       | K16197 |
| ENSG00000147677 | 0.276379  | 9.041942 | 0.673002 | 1 EIF3H       | K03247 |
| ENSG00000168778 | 0.298197  | 3.263762 | 0.673043 | 1 TCTN2       | K19361 |
| ENSG00000149554 | -0.280638 | 5.652855 | 0.673049 | 1 CHEK1       | K02216 |
| ENSG00000137842 | -0.287051 | 4.862482 | 0.673064 | 1 TMEM62      | K10625 |
| ENSG00000188549 | 0.284949  | 5.10592  | 0.673109 | 1 C15orf52    | -      |
| ENSG00000144741 | -0.290778 | 3.921558 | 0.673206 | 1 SLC25A26    | K15111 |
| ENSG00000196652 | -0.289068 | 4.698409 | 0.673283 | 1 ZKSCAN5     | K09229 |
| ENSG00000215030 | 0.278005  | 6.641655 | 0.673368 | 1 RPL13P12    | K02873 |
| ENSG00000166839 | 0.329596  | 2.216391 | 0.673545 | 1 ANKDD1A     | K12581 |
| ENSG00000213689 | 0.287564  | 4.507825 | 0.67356  | 1 TREX1       | K10790 |
| ENSG00000108641 | -0.286707 | 4.393269 | 0.673575 | 1 B9D1        | K16744 |
| ENSG00000161647 | -0.286707 | 4.393269 | 0.673575 | 1 MPP3        | -      |
| ENSG00000188985 | -0.284978 | 4.26469  | 0.673592 | 1 DHFRP1      | K00287 |
| ENSG00000172795 | -0.282983 | 5.306158 | 0.67364  | 1 DCP2        | K12613 |
| ENSG00000108091 | 0.277588  | 6.746797 | 0.673644 | 1 CCDC6       | K09288 |
| ENSG00000099822 | 0.280388  | 5.716394 | 0.67369  | 1 HCN2        | K04955 |
| ENSG00000183431 | -0.276597 | 7.614118 | 0.673747 | 1 SF3A3       | K12827 |
| ENSG00000114744 | -0.278533 | 5.73163  | 0.673812 | 1 COMMD2      | -      |
| ENSG00000141994 | -0.282957 | 4.866979 | 0.673969 | 1 DUS3L       | K05544 |

|                 |           |          |          |                |        |
|-----------------|-----------|----------|----------|----------------|--------|
| ENSG00000132004 | 0.292637  | 4.152954 | 0.673974 | 1 FBXW9        | K10265 |
| ENSG00000115514 | -0.278992 | 6.294943 | 0.673994 | 1 TXNDC9       | -      |
| ENSG00000142541 | 0.274894  | 11.36943 | 0.674251 | 1 RPL13A       | K02872 |
| ENSG00000164187 | 0.282649  | 5.073691 | 0.674278 | 1 LMBRD2       | -      |
| ENSG00000101901 | -0.28447  | 4.703441 | 0.674296 | 1 ALG13        | K07432 |
| ENSG00000100815 | -0.281642 | 4.912774 | 0.674388 | 1 TRIP11       | -      |
| ENSG00000007341 | -0.28871  | 4.365923 | 0.674535 | 1 ST7L         | -      |
| ENSG00000138032 | -0.279714 | 5.592407 | 0.674545 | 1 PPM1B        | K04461 |
| ENSG00000174238 | 0.276878  | 6.174127 | 0.674601 | 1 PITPNA       | -      |
| ENSG00000169871 | 0.294099  | 3.684832 | 0.67468  | 1 TRIM56       | K12756 |
| ENSG00000106992 | 0.284526  | 4.082227 | 0.674773 | 1 AK1          | K00939 |
| ENSG00000076108 | 0.276484  | 6.802143 | 0.674776 | 1 BAZ2A        | K15224 |
| ENSG00000215193 | 0.278893  | 5.578007 | 0.67497  | 1 PEX26        | K13340 |
| ENSG00000137880 | 0.279685  | 5.710535 | 0.675081 | 1 GCHFR        | -      |
| ENSG00000184056 | -0.286614 | 4.430313 | 0.675096 | 1 VPS33B       | -      |
| ENSG00000151748 | -0.278518 | 5.468292 | 0.675102 | 1 SAV1         | K16686 |
| ENSG00000138944 | 0.284116  | 4.572012 | 0.675209 | 1 KIAA1644     | -      |
| ENSG00000104884 | -0.2775   | 5.844939 | 0.675274 | 1 ERCC2        | K10844 |
| ENSG00000105699 | 0.289226  | 3.960566 | 0.675305 | 1 LSR          | -      |
| ENSG00000135736 | 0.289226  | 3.960566 | 0.675305 | 1 CCDC102A     | K16759 |
| ENSG00000166377 | -0.29888  | 2.906509 | 0.675443 | 1 ATP9B        | K01530 |
| ENSG00000153975 | -0.281667 | 4.938715 | 0.675446 | 1 ZUFSP        | -      |
| ENSG00000101856 | -0.275208 | 7.462203 | 0.675458 | 1 PGRMC1       | K17278 |
| ENSG00000167685 | 0.283165  | 5.039385 | 0.675502 | 1 ZNF444       | K09230 |
| ENSG00000166226 | -0.27435  | 8.520352 | 0.675553 | 1 CCT2         | K09494 |
| ENSG00000116731 | 0.304943  | 3.277264 | 0.675706 | 1 PRDM2        | K11432 |
| ENSG00000087088 | -0.277917 | 5.95706  | 0.67577  | 1 BAX          | K02159 |
| ENSG00000117505 | -0.274988 | 7.38071  | 0.675799 | 1 DR1          | -      |
| ENSG00000236859 | 0.324581  | 2.498193 | 0.675907 | 1 NIFK-AS1     | -      |
| ENSG00000265096 | 0.324581  | 2.498193 | 0.675907 | 1 C1QTNF1-AS1  | -      |
| ENSG00000137309 | -0.273777 | 8.746351 | 0.676077 | 1 HMGA1        | K09282 |
| ENSG00000100865 | -0.2814   | 4.686515 | 0.6761   | 1 CINP         | -      |
| ENSG00000157741 | -0.281749 | 5.026001 | 0.676136 | 1 UBN2         | K17492 |
| ENSG00000167670 | 0.27485   | 7.033585 | 0.67624  | 1 CHAF1A       | K10750 |
| ENSG00000064601 | 0.274019  | 7.872893 | 0.676266 | 1 CTSA         | K13289 |
| ENSG00000096433 | 0.274406  | 7.388095 | 0.67629  | 1 ITPR3        | K04960 |
| ENSG00000117222 | -0.284758 | 4.438406 | 0.676306 | 1 RBBP5        | K14961 |
| ENSG00000140632 | 0.278113  | 5.571558 | 0.676506 | 1 GLYR1        | -      |
| ENSG00000137942 | 0.275015  | 6.737352 | 0.676519 | 1 FNBP1L       | -      |
| ENSG00000243554 | -0.36819  | 1.957939 | 0.676549 | 1 AC004967.7   | -      |
| ENSG00000177409 | -0.34718  | 1.94562  | 0.676549 | 1 SAMD9L       | -      |
| ENSG00000225361 | -0.34718  | 1.94562  | 0.676549 | 1 PPP1R26-AS1  | -      |
| ENSG00000003393 | -0.285159 | 4.136044 | 0.6766   | 1 ALS2         | K04575 |
| ENSG00000140718 | 0.29531   | 3.926257 | 0.676639 | 1 FTO          | K19469 |
| ENSG00000143815 | -0.276889 | 6.273594 | 0.676748 | 1 LBR          | K19532 |
| ENSG00000198804 | 0.272538  | 13.96935 | 0.676795 | 1 MT-CO1       | K02256 |
| ENSG00000102053 | -0.387832 | 1.037639 | 0.676811 | 1 ZC3H12B      | K18668 |
| ENSG00000226471 | -0.387832 | 1.037639 | 0.676811 | 1 CTA-292E10.6 | -      |
| ENSG00000226800 | -0.387832 | 1.037639 | 0.676811 | 1 CACTIN-AS1   | -      |
| ENSG00000213079 | -0.282941 | 4.664236 | 0.676922 | 1 SCAF8        | K13191 |
| ENSG00000185246 | -0.281655 | 4.925803 | 0.676989 | 1 PRPF39       | K13217 |
| ENSG00000163625 | -0.282899 | 4.211275 | 0.67715  | 1 WDFY3        | -      |
| ENSG00000126882 | 0.285674  | 4.013207 | 0.677263 | 1 FAM78A       | K15696 |
| ENSG00000104219 | -0.285339 | 4.019311 | 0.677263 | 1 ZDHHC2       | K18932 |
| ENSG00000171763 | -0.277243 | 5.371096 | 0.677304 | 1 SPATA5L1     | -      |
| ENSG00000214455 | -0.314398 | 3.158457 | 0.677357 | 1 RCN1P2       | -      |
| ENSG00000100241 | 0.273541  | 6.991408 | 0.677757 | 1 SBF1         | K18061 |
| ENSG00000134871 | 0.272368  | 8.313941 | 0.677808 | 1 COL4A2       | K06237 |

|                 |           |          |          |                 |        |
|-----------------|-----------|----------|----------|-----------------|--------|
| ENSG00000119431 | 0.278186  | 5.354767 | 0.677826 | 1 HDHD3         | K02159 |
| ENSG00000107341 | 0.273909  | 6.578718 | 0.67804  | 1 UBE2R2        | K02207 |
| ENSG00000164038 | -0.290921 | 3.895298 | 0.678041 | 1 SLC9B2        | K00019 |
| ENSG00000119541 | -0.275906 | 5.650244 | 0.678063 | 1 VPS4B         | K12196 |
| ENSG00000107669 | -0.279492 | 5.095546 | 0.678137 | 1 ATE1          | K00685 |
| ENSG00000146574 | -0.277606 | 5.205282 | 0.678141 | 1 CCZ1B         | -      |
| ENSG00000198301 | -0.277606 | 5.205282 | 0.678141 | 1 SDAD1         | K14856 |
| ENSG00000120837 | -0.275263 | 5.812576 | 0.678152 | 1 NFYB          | K08065 |
| ENSG00000136840 | 0.277627  | 5.222244 | 0.678257 | 1 ST6GALNAC4    | K03374 |
| ENSG00000129667 | -0.280476 | 4.99474  | 0.67827  | 1 RHBDF2        | -      |
| ENSG00000227345 | -0.285095 | 4.180214 | 0.678318 | 1 PARG          | K07759 |
| ENSG00000186300 | 0.293889  | 3.646796 | 0.678336 | 1 ZNF555        | K09228 |
| ENSG00000162409 | -0.274647 | 5.70333  | 0.678401 | 1 PRKAA2        | K07198 |
| ENSG00000097021 | -0.274812 | 6.175203 | 0.678457 | 1 ACOT7         | K17360 |
| ENSG00000102900 | -0.27314  | 6.903492 | 0.678544 | 1 NUP93         | K14309 |
| ENSG00000165813 | -0.292954 | 3.986599 | 0.678599 | 1 C10orf118     | -      |
| ENSG00000127561 | -0.29505  | 3.713566 | 0.678664 | 1 SYNGR3        | -      |
| ENSG00000221926 | -0.282903 | 4.253232 | 0.678767 | 1 TRIM16        | K09228 |
| ENSG00000063854 | 0.275092  | 5.728034 | 0.679053 | 1 HAGH          | K01069 |
| ENSG00000165591 | -0.291387 | 3.81352  | 0.679253 | 1 FAAH2         | K19176 |
| ENSG00000204852 | -0.291387 | 3.81352  | 0.679253 | 1 TCTN1         | K19382 |
| ENSG00000175505 | -0.297776 | 3.008105 | 0.679347 | 1 CLCF1         | K05421 |
| ENSG00000152503 | 0.409081  | 1.314887 | 0.679362 | 1 TRIM36        | K12013 |
| ENSG00000215769 | 0.409081  | 1.314887 | 0.679362 | 1 hsa-mir-6080  | -      |
| ENSG00000175772 | 0.367463  | 1.334896 | 0.679362 | 1 LINC01106     | -      |
| ENSG00000142186 | 0.271452  | 7.523596 | 0.679441 | 1 SCYL1         | K08876 |
| ENSG00000146700 | 0.292921  | 3.483769 | 0.679475 | 1 SRCRB4D       | K16198 |
| ENSG00000042429 | -0.27432  | 5.887    | 0.679478 | 1 MED17         | K15133 |
| ENSG00000138074 | -0.277119 | 5.082672 | 0.679548 | 1 SLC5A6        | K14386 |
| ENSG00000100731 | 0.273062  | 6.310934 | 0.679583 | 1 PCNX          | -      |
| ENSG00000226015 | -0.305654 | 2.408414 | 0.679644 | 1 CCT8P1        | K09500 |
| ENSG00000227081 | 0.272098  | 6.785106 | 0.679686 | 1 RP11-543P15.1 | K02978 |
| ENSG00000138018 | -0.273874 | 5.576893 | 0.6797   | 1 EPT1          | K00993 |
| ENSG00000114270 | -0.285035 | 4.223071 | 0.679935 | 1 COL7A1        | K16628 |
| ENSG00000118363 | -0.274536 | 5.808675 | 0.67994  | 1 SPCS2         | K12947 |
| ENSG00000062598 | -0.276869 | 5.023298 | 0.680005 | 1 ELMO2         | K18985 |
| ENSG00000073331 | -0.282817 | 3.6131   | 0.680092 | 1 ALPK1         | K08868 |
| ENSG00000095002 | -0.271809 | 6.81485  | 0.68018  | 1 MSH2          | K08735 |
| ENSG00000214182 | 0.289886  | 2.514816 | 0.68032  | 1 PTMAP5        | K13784 |
| ENSG00000036549 | -0.271856 | 6.629091 | 0.680482 | 1 ZZZ3          | -      |
| ENSG00000099331 | 0.272449  | 5.832668 | 0.680519 | 1 MYO9B         | K10360 |
| ENSG00000025772 | -0.271661 | 6.654532 | 0.680649 | 1 TOMM34        | K17766 |
| ENSG00000183508 | 0.275112  | 5.179268 | 0.680774 | 1 FAM46C        | -      |
| ENSG00000123737 | -0.274111 | 6.150137 | 0.680796 | 1 EXOSC9        | K03678 |
| ENSG00000050426 | 0.271021  | 6.816218 | 0.680835 | 1 LETMD1        | -      |
| ENSG00000176148 | 0.280216  | 3.764693 | 0.680856 | 1 TCP11L1       | -      |
| ENSG00000127328 | -0.281364 | 4.655564 | 0.68087  | 1 RAB3IP        | K16779 |
| ENSG00000171490 | -0.269494 | 8.720028 | 0.680873 | 1 RSL1D1        | K14775 |
| ENSG00000249042 | -0.294889 | 3.316047 | 0.680906 | 1 CTD-2015H6.3  | -      |
| ENSG00000181240 | 0.345764  | 1.574563 | 0.680978 | 1 SLC25A41      | K14684 |
| ENSG00000226237 | 0.345764  | 1.574563 | 0.680978 | 1 RP11-276H19.1 | -      |
| ENSG00000083123 | -0.280655 | 4.155802 | 0.680986 | 1 BCKDHB        | K00167 |
| ENSG00000126822 | 0.278055  | 5.085387 | 0.681075 | 1 PLEKHG3       | -      |
| ENSG00000120727 | 0.27018   | 7.221535 | 0.681198 | 1 PAIP2         | -      |
| ENSG00000213593 | -0.270157 | 7.31541  | 0.681267 | 1 TMX2          | -      |
| ENSG00000182473 | -0.272916 | 5.148363 | 0.681328 | 1 EXOC7         | K07195 |
| ENSG00000017797 | 0.270607  | 6.152053 | 0.681526 | 1 RALBP1        | K08773 |
| ENSG00000115866 | -0.272537 | 6.163035 | 0.681565 | 1 DARS          | K01876 |



|                 |           |          |          |                   |        |
|-----------------|-----------|----------|----------|-------------------|--------|
| ENSG00000123728 | -0.270418 | 6.172787 | 0.681603 | 1 RAP2C           | K07839 |
| ENSG00000047365 | -0.299496 | 2.852891 | 0.681793 | 1 ARAP2           | K18440 |
| ENSG00000167637 | -0.299496 | 2.852891 | 0.681793 | 1 ZNF283          | K09228 |
| ENSG00000213965 | -0.275828 | 5.277076 | 0.681847 | 1 NUDT19          | K13355 |
| ENSG00000115109 | -0.279803 | 4.662492 | 0.68189  | 1 EPB41L5         | -      |
| ENSG00000102710 | -0.271237 | 6.068957 | 0.681925 | 1 SUPT20H         | -      |
| ENSG00000004961 | -0.271937 | 6.357195 | 0.68199  | 1 HCCS            | K01764 |
| ENSG00000237989 | 0.330041  | 1.780073 | 0.682082 | 1 AP001046.5      | -      |
| ENSG00000151364 | -0.303857 | 2.935592 | 0.682157 | 1 KCTD14          | K03968 |
| ENSG00000176542 | -0.303857 | 2.935592 | 0.682157 | 1 KIAA2018        | K07560 |
| ENSG00000092929 | -0.272078 | 5.855576 | 0.68237  | 1 UNC13D          | K19728 |
| ENSG00000163026 | -0.289082 | 3.679683 | 0.682371 | 1 C2orf44         | -      |
| ENSG00000114439 | -0.272425 | 5.988454 | 0.682414 | 1 BBX             | -      |
| ENSG00000100219 | -0.26836  | 8.16632  | 0.682463 | 1 XBP1            | K09027 |
| ENSG00000105136 | -0.292598 | 3.029622 | 0.682477 | 1 ZNF419          | K09228 |
| ENSG00000233328 | -0.292598 | 3.029622 | 0.682477 | 1 PFN1P1          | K05759 |
| ENSG00000107745 | 0.271633  | 6.220784 | 0.682481 | 1 MICU1           | -      |
| ENSG00000104129 | -0.285064 | 4.201802 | 0.682551 | 1 DNAJC17         | K09537 |
| ENSG00000099940 | 0.269977  | 5.922279 | 0.682605 | 1 SNAP29          | K08509 |
| ENSG00000182518 | -0.296817 | 3.103004 | 0.682761 | 1 FAM104B         | -      |
| ENSG00000251136 | -0.334618 | 1.990033 | 0.682879 | 1 RP11-37B2.1     | -      |
| ENSG00000186395 | -0.275284 | 4.954323 | 0.682902 | 1 KRT10           | K07604 |
| ENSG00000100142 | -0.272333 | 5.59241  | 0.682938 | 1 POLR2F          | K03014 |
| ENSG00000105220 | 0.267402  | 8.853584 | 0.683101 | 1 GPI             | K01810 |
| ENSG00000011021 | -0.299604 | 3.257754 | 0.683242 | 1 CLCN6           | K05015 |
| ENSG00000137207 | 0.269207  | 6.579161 | 0.68328  | 1 YIPF3           | -      |
| ENSG00000176563 | 0.54798   | 0.209188 | 0.683327 | 1 CNTD1           | -      |
| ENSG00000235531 | 0.54798   | 0.209188 | 0.683327 | 1 RP11-383H13.1   | K04984 |
| ENSG00000247121 | 0.54798   | 0.209188 | 0.683327 | 1 CTD-2260A17.2   | -      |
| ENSG00000247199 | 0.54798   | 0.209188 | 0.683327 | 1 RP11-373N22.3   | -      |
| ENSG00000261659 | 0.54798   | 0.209188 | 0.683327 | 1 LA16c-313D11.12 | -      |
| ENSG00000272831 | 0.54798   | 0.209188 | 0.683327 | 1 RP11-792A8.4    | -      |
| ENSG00000003147 | -0.47101  | 0.295755 | 0.683327 | 1 ICA1            | -      |
| ENSG00000139547 | -0.47101  | 0.295755 | 0.683327 | 1 RDH16           | K11154 |
| ENSG00000142661 | -0.47101  | 0.295755 | 0.683327 | 1 MYOM3           | -      |
| ENSG00000273466 | -0.47101  | 0.295755 | 0.683327 | 1 RP11-548H3.1    | -      |
| ENSG00000108797 | 0.449586  | 0.254364 | 0.683327 | 1 CNTNAP1         | K07379 |
| ENSG00000153165 | 0.449586  | 0.254364 | 0.683327 | 1 RGPD3           | K12172 |
| ENSG00000154874 | 0.449586  | 0.254364 | 0.683327 | 1 CCDC144B        | K09537 |
| ENSG00000197506 | 0.449586  | 0.254364 | 0.683327 | 1 SLC28A3         | K11536 |
| ENSG00000232803 | 0.449586  | 0.254364 | 0.683327 | 1 RP11-93B14.5    | -      |
| ENSG00000254910 | 0.449586  | 0.254364 | 0.683327 | 1 RP11-326C3.7    | -      |
| ENSG00000261089 | 0.449586  | 0.254364 | 0.683327 | 1 RP11-435I10.3   | K09554 |
| ENSG00000265437 | 0.449586  | 0.254364 | 0.683327 | 1 RP11-757O6.4    | -      |
| ENSG00000126698 | -0.26861  | 7.066623 | 0.683338 | 1 DNAJC8          | K09528 |
| ENSG00000060642 | -0.290749 | 3.333468 | 0.683447 | 1 PIGV            | K07542 |
| ENSG00000234009 | 0.280156  | 4.045525 | 0.683536 | 1 RPL5P34         | K02932 |
| ENSG00000198825 | -0.278066 | 4.051302 | 0.683536 | 1 INPP5F          | -      |
| ENSG00000117528 | 0.268473  | 6.889148 | 0.683564 | 1 ABCD3           | K05677 |
| ENSG00000226415 | 0.278839  | 4.084873 | 0.683645 | 1 TPI1P1          | K01803 |
| ENSG00000132549 | -0.277983 | 4.589758 | 0.683704 | 1 VPS13B          | K19526 |
| ENSG00000117697 | -0.273843 | 5.286083 | 0.683833 | 1 NSL1            | K11545 |
| ENSG00000167699 | -0.271179 | 5.742313 | 0.683855 | 1 GLOD4           | -      |
| ENSG00000146083 | -0.273821 | 5.56861  | 0.683935 | 1 RNF44           | K19041 |
| ENSG00000254893 | 0.335136  | 2.280655 | 0.683945 | 1 RP11-466P24.2   | K07836 |
| ENSG00000197208 | 0.31472   | 2.290442 | 0.683945 | 1 SLC22A4         | K08202 |
| ENSG00000125968 | -0.266603 | 8.9404   | 0.684012 | 1 ID1             | K04680 |
| ENSG00000127993 | -0.285006 | 4.244031 | 0.684026 | 1 RBM48           | K15696 |

|                 |           |          |          |                 |        |
|-----------------|-----------|----------|----------|-----------------|--------|
| ENSG00000165312 | 0.268226  | 6.769076 | 0.684034 | 1 OTUD1         | K13716 |
| ENSG00000140471 | -0.292506 | 3.634576 | 0.68423  | 1 LINS          | -      |
| ENSG00000167395 | 0.273239  | 4.820698 | 0.684265 | 1 ZNF646        | -      |
| ENSG00000105701 | 0.26657   | 8.13678  | 0.684402 | 1 FKBP8         | K09574 |
| ENSG00000151176 | 0.280444  | 4.408002 | 0.684407 | 1 PLBD2         | -      |
| ENSG00000116133 | 0.266366  | 8.244948 | 0.684562 | 1 DHCR24        | K09828 |
| ENSG00000156675 | 0.271122  | 4.979438 | 0.684596 | 1 RAB11FIP1     | K12484 |
| ENSG00000229043 | -0.317253 | 2.557926 | 0.684618 | 1 AC091729.9    | -      |
| ENSG00000063761 | -0.303469 | 2.550003 | 0.684618 | 1 ADCK1         | K08869 |
| ENSG00000204650 | -0.303469 | 2.550003 | 0.684618 | 1 CRHR1-IT1     | K06883 |
| ENSG00000140545 | 0.288025  | 3.830862 | 0.684665 | 1 MFGE8         | K17253 |
| ENSG00000140939 | 0.278506  | 4.560926 | 0.684711 | 1 NOL3          | -      |
| ENSG00000167491 | 0.26839   | 6.319193 | 0.684715 | 1 GATAD2A       | -      |
| ENSG00000110911 | -0.268433 | 6.436721 | 0.684717 | 1 SLC11A2       | K12347 |
| ENSG00000174485 | 0.286254  | 3.876427 | 0.684756 | 1 DENND4A       | -      |
| ENSG00000116221 | 0.266308  | 7.712947 | 0.685016 | 1 MRPL37        | K17418 |
| ENSG00000100568 | -0.269462 | 5.867633 | 0.685025 | 1 VTI1B         | K08493 |
| ENSG00000198270 | -0.294574 | 2.76513  | 0.685079 | 1 TMEM116       | -      |
| ENSG00000204316 | -0.282886 | 4.100707 | 0.685134 | 1 MRPL38        | K17419 |
| ENSG00000150593 | 0.26592   | 7.752171 | 0.685417 | 1 PDCD4         | K16865 |
| ENSG00000144381 | -0.264954 | 10.32934 | 0.685497 | 1 HSPD1         | K04077 |
| ENSG00000185379 | 0.28957   | 3.031553 | 0.685548 | 1 RAD51D        | K10871 |
| ENSG00000147133 | -0.271661 | 5.130965 | 0.685596 | 1 TAF1          | K03125 |
| ENSG00000137100 | 0.271041  | 5.276503 | 0.685775 | 1 DCTN3         | K10425 |
| ENSG00000127837 | -0.267297 | 6.498101 | 0.685847 | 1 AAMP          | -      |
| ENSG00000178741 | -0.265734 | 7.492239 | 0.686004 | 1 COX5A         | K02264 |
| ENSG00000187626 | 0.292344  | 3.394795 | 0.686023 | 1 ZKSCAN4       | K09229 |
| ENSG00000121897 | -0.286272 | 3.532124 | 0.686152 | 1 LIAS          | K03644 |
| ENSG00000085872 | 0.269938  | 5.686854 | 0.686186 | 1 CHERP         | K12841 |
| ENSG00000175556 | -0.282822 | 3.644979 | 0.686261 | 1 LONRF3        | -      |
| ENSG00000100243 | 0.265409  | 7.381483 | 0.686349 | 1 CYB5R3        | K00326 |
| ENSG00000225241 | -0.282871 | 3.98095  | 0.686529 | 1 RP11-640M9.2  | K10653 |
| ENSG00000174938 | 0.26816   | 5.429013 | 0.686531 | 1 SEZ6L2        | -      |
| ENSG00000137814 | -0.268367 | 5.523615 | 0.686587 | 1 HAUS2         | K16585 |
| ENSG00000197694 | 0.264684  | 8.009471 | 0.686602 | 1 SPTAN1        | K06114 |
| ENSG00000070061 | -0.266583 | 6.473668 | 0.686698 | 1 IKBKAP        | K11373 |
| ENSG00000241506 | -0.279219 | 4.426195 | 0.686784 | 1 PSMC1P1       | K03062 |
| ENSG00000121964 | -0.493762 | 0.759606 | 0.686852 | 1 GTDC1         | -      |
| ENSG00000135119 | -0.443433 | 0.729491 | 0.686852 | 1 RNFT2         | -      |
| ENSG00000166704 | -0.443433 | 0.729491 | 0.686852 | 1 ZNF606        | K09228 |
| ENSG00000250073 | -0.443433 | 0.729491 | 0.686852 | 1 RP11-677M14.3 | -      |
| ENSG00000173762 | 0.38422   | 0.719999 | 0.686852 | 1 CD7           | K06457 |
| ENSG00000268262 | 0.38422   | 0.719999 | 0.686852 | 1 CTC-246B18.8  | -      |
| ENSG00000103042 | -0.274766 | 4.604223 | 0.686864 | 1 SLC38A7       | K14994 |
| ENSG00000166123 | -0.271387 | 5.09681  | 0.687036 | 1 GPT2          | K00814 |
| ENSG00000162407 | -0.269086 | 5.318274 | 0.687094 | 1 PPAP2B        | K01080 |
| ENSG00000124562 | -0.264846 | 7.345372 | 0.68717  | 1 SNRPC         | K11095 |
| ENSG00000114779 | -0.268618 | 5.707533 | 0.687176 | 1 ABHD14B       | K13706 |
| ENSG00000138750 | -0.266929 | 6.154465 | 0.687603 | 1 NUP54         | K14308 |
| ENSG00000110104 | -0.264978 | 6.085835 | 0.687611 | 1 CCDC86        | K14822 |
| ENSG00000135677 | 0.263626  | 8.192612 | 0.687667 | 1 GNS           | K01137 |
| ENSG00000184752 | -0.269271 | 5.614932 | 0.687678 | 1 NDUFA12       | -      |
| ENSG00000113593 | -0.267073 | 5.484036 | 0.6877   | 1 PPWD1         | K12736 |
| ENSG00000117481 | -0.269516 | 5.019233 | 0.687796 | 1 NSUN4         | K17985 |
| ENSG00000135362 | 0.271501  | 4.486538 | 0.68794  | 1 PRR5L         | -      |
| ENSG00000158158 | 0.275409  | 4.105455 | 0.688072 | 1 CNNM4         | K16302 |
| ENSG00000149196 | -0.266661 | 5.859362 | 0.688079 | 1 C11orf73      | -      |
| ENSG00000143321 | -0.262764 | 9.496896 | 0.688132 | 1 HDGF          | K16641 |

|                 |           |          |          |                    |        |
|-----------------|-----------|----------|----------|--------------------|--------|
| ENSG00000226525 | -0.361359 | 1.119694 | 0.688138 | 1 RPS7P10          | K02993 |
| ENSG00000101997 | 0.34902   | 1.071792 | 0.688138 | 1 CCDC22           | -      |
| ENSG00000148057 | 0.34902   | 1.071792 | 0.688138 | 1 IDNK             | K00851 |
| ENSG00000158321 | 0.34902   | 1.071792 | 0.688138 | 1 AUTS2            | -      |
| ENSG00000168734 | 0.34902   | 1.071792 | 0.688138 | 1 PKIG             | -      |
| ENSG00000273247 | 0.34902   | 1.071792 | 0.688138 | 1 RP11-83A24.2     | -      |
| ENSG00000237296 | 0.277688  | 3.891398 | 0.688157 | 1 SMG1P1           | K08873 |
| ENSG00000123989 | -0.265147 | 6.53542  | 0.688168 | 1 CHPF             | K00747 |
| ENSG00000130338 | 0.282424  | 3.751687 | 0.688219 | 1 TULP4            | K17985 |
| ENSG00000232559 | -0.286124 | 3.598753 | 0.688291 | 1 GS1-124K5.12     | K16467 |
| ENSG00000181284 | 0.274706  | 3.589919 | 0.688291 | 1 TMEM102          | -      |
| ENSG00000111321 | 0.26315   | 8.012696 | 0.688321 | 1 LTBR             | K03159 |
| ENSG00000167157 | 0.288085  | 3.268531 | 0.688445 | 1 PRRX2            | K09329 |
| ENSG00000091732 | -0.269702 | 5.163104 | 0.688472 | 1 ZC3HC1           | -      |
| ENSG00000223803 | 0.280378  | 3.203508 | 0.688482 | 1 RPS20P14         | K02969 |
| ENSG00000248508 | 0.280378  | 3.203508 | 0.688482 | 1 SRP14-AS1        | -      |
| ENSG00000135913 | 0.294085  | 3.124915 | 0.688521 | 1 USP37            | K11850 |
| ENSG00000225648 | 0.297589  | 3.047362 | 0.688562 | 1 SBDSP1           | K14574 |
| ENSG00000117318 | 0.262717  | 8.262621 | 0.688645 | 1 ID3              | K17694 |
| ENSG00000258056 | -0.30465  | 2.88307  | 0.688653 | 1 RP11-644F5.11    | -      |
| ENSG00000259877 | -0.395562 | 1.398267 | 0.688667 | 1 RP11-46C24.7     | -      |
| ENSG00000197566 | -0.36397  | 1.379584 | 0.688667 | 1 ZNF624           | K09228 |
| ENSG00000254614 | -0.36397  | 1.379584 | 0.688667 | 1 AP003068.23      | K08694 |
| ENSG00000259901 | -0.36397  | 1.379584 | 0.688667 | 1 RP5-991G20.4     | -      |
| ENSG00000263843 | -0.36397  | 1.379584 | 0.688667 | 1 RP11-649A18.12   | -      |
| ENSG00000132640 | -0.263036 | 7.849071 | 0.688678 | 1 BTBD3            | K10478 |
| ENSG00000165997 | -0.267059 | 5.633582 | 0.6887   | 1 ARL5B            | K07950 |
| ENSG00000104880 | 0.264783  | 5.631239 | 0.6887   | 1 ARHGEF18         | -      |
| ENSG00000268205 | -0.274528 | 4.821197 | 0.688742 | 1 CTC-444N24.11    | -      |
| ENSG00000197405 | -0.30167  | 2.678901 | 0.688752 | 1 C5AR1            | K04010 |
| ENSG00000103150 | 0.291167  | 2.674328 | 0.688752 | 1 MLYCD            | K01578 |
| ENSG00000174194 | 0.312498  | 2.559346 | 0.688805 | 1 AGAP8            | K12491 |
| ENSG00000217130 | 0.312498  | 2.559346 | 0.688805 | 1 RP3-375P9.2      | K02947 |
| ENSG00000263002 | 0.312498  | 2.559346 | 0.688805 | 1 ZNF234           | K09228 |
| ENSG00000162341 | -0.296209 | 2.579442 | 0.688805 | 1 TPCN2            | K14077 |
| ENSG00000134900 | -0.264762 | 6.434709 | 0.688822 | 1 TPP2             | K01280 |
| ENSG00000154079 | -0.312508 | 2.449422 | 0.688856 | 1 C6orf57          | K17985 |
| ENSG00000149591 | -0.322572 | 1.640116 | 0.688885 | 1 TAGLN            | -      |
| ENSG00000186132 | -0.306932 | 2.332025 | 0.688906 | 1 C2orf76          | -      |
| ENSG00000074054 | 0.265744  | 5.391849 | 0.688926 | 1 CLASP1           | K16578 |
| ENSG00000235453 | -0.328085 | 2.17637  | 0.688947 | 1 TOPORS-AS1       | -      |
| ENSG00000254837 | 0.301204  | 2.159943 | 0.688947 | 1 AP001372.2       | -      |
| ENSG00000264247 | -0.352379 | 1.839211 | 0.688962 | 1 LINC00909        | -      |
| ENSG00000165698 | 0.348173  | 1.816835 | 0.688962 | 1 C9orf9           | -      |
| ENSG00000146205 | 0.319698  | 1.830619 | 0.688962 | 1 ANO7             | K19501 |
| ENSG00000181619 | 0.319698  | 1.830619 | 0.688962 | 1 GPR135           | K08427 |
| ENSG00000166816 | -0.322852 | 2.033137 | 0.688972 | 1 LDHD             | K00102 |
| ENSG00000267010 | -0.322852 | 2.033137 | 0.688972 | 1 RP11-108P20.1    | -      |
| ENSG00000269293 | -0.322852 | 2.033137 | 0.688972 | 1 ZSCAN16-AS1      | -      |
| ENSG00000213468 | -0.302722 | 2.021473 | 0.688972 | 1 RP11-453F18__B.1 | -      |
| ENSG00000043093 | -0.265539 | 5.878848 | 0.689371 | 1 DCUN1D1          | K17822 |
| ENSG00000180182 | 0.263957  | 6.408212 | 0.689376 | 1 MED14            | K15156 |
| ENSG00000141068 | 0.271605  | 4.189693 | 0.689418 | 1 KSR1             | K14958 |
| ENSG00000125734 | 0.263291  | 6.309246 | 0.689834 | 1 GPR108           | -      |
| ENSG00000221914 | 0.263218  | 6.094723 | 0.689845 | 1 PPP2R2A          | K04354 |
| ENSG00000105248 | -0.270483 | 4.672789 | 0.689873 | 1 CCDC94           | K15225 |
| ENSG00000112701 | -0.263495 | 6.569953 | 0.689943 | 1 SENP6            | K08595 |
| ENSG00000100372 | -0.266361 | 5.772281 | 0.689985 | 1 SLC25A17         | K13354 |

|                 |           |          |          |                 |        |
|-----------------|-----------|----------|----------|-----------------|--------|
| ENSG00000134324 | 0.270823  | 4.584949 | 0.690013 | 1 LPIN1         | K15728 |
| ENSG00000048140 | -0.265753 | 5.720885 | 0.690076 | 1 TSPAN17       | K10303 |
| ENSG00000124486 | 0.261755  | 7.757841 | 0.690085 | 1 USP9X         | K11840 |
| ENSG00000196154 | 0.260931  | 9.68426  | 0.690115 | 1 S100A4        | -      |
| ENSG00000121621 | -0.2651   | 5.66759  | 0.690174 | 1 KIF18A        | K10401 |
| ENSG00000167994 | 0.267203  | 4.986391 | 0.690203 | 1 RAB3IL1       | K16779 |
| ENSG00000103254 | -0.263892 | 5.300595 | 0.690317 | 1 FAM173A       | -      |
| ENSG00000106305 | -0.263815 | 5.996039 | 0.69042  | 1 AIMP2         | K15438 |
| ENSG00000171940 | -0.266356 | 5.42102  | 0.690685 | 1 ZNF217        | -      |
| ENSG00000164329 | -0.264648 | 5.861626 | 0.69071  | 1 PAPD4         | K14079 |
| ENSG00000001629 | 0.263642  | 6.195822 | 0.690725 | 1 ANKIB1        | K11967 |
| ENSG00000198874 | -0.268002 | 4.731673 | 0.690736 | 1 TYW1          | K15449 |
| ENSG00000271975 | 0.270048  | 4.199297 | 0.690782 | 1 RP11-383J24.6 | -      |
| ENSG00000117533 | -0.269928 | 4.204049 | 0.690782 | 1 VAMP4         | K08513 |
| ENSG00000100722 | -0.265259 | 5.61672  | 0.690794 | 1 ZC3H14        | -      |
| ENSG00000114988 | -0.273808 | 4.705073 | 0.690795 | 1 LMAN2L        | K10083 |
| ENSG00000132475 | -0.260424 | 9.311981 | 0.690818 | 1 H3F3B         | K11253 |
| ENSG00000171159 | -0.270692 | 5.013823 | 0.690942 | 1 C9orf16       | -      |
| ENSG00000116017 | -0.280538 | 4.087858 | 0.691051 | 1 ARID3A        | K17985 |
| ENSG00000226221 | 0.270382  | 4.564687 | 0.691123 | 1 AC022431.1    | K02898 |
| ENSG00000144579 | -0.264566 | 5.686426 | 0.69113  | 1 CTDSP1        | K15731 |
| ENSG00000119688 | -0.282874 | 4.005711 | 0.691256 | 1 ABCD4         | K05678 |
| ENSG00000198915 | -0.268962 | 4.509275 | 0.691273 | 1 RASGEF1A      | K00746 |
| ENSG00000154222 | 0.271403  | 4.412194 | 0.691523 | 1 CC2D1B        | K18260 |
| ENSG00000112874 | -0.277406 | 3.874373 | 0.691612 | 1 NUDT12        | K03426 |
| ENSG00000198087 | -0.261473 | 6.826515 | 0.691717 | 1 CD2AP         | K13738 |
| ENSG00000129187 | -0.26496  | 5.456368 | 0.691763 | 1 DCTD          | K01493 |
| ENSG00000131653 | 0.260625  | 7.256085 | 0.691859 | 1 TRAF7         | K10646 |
| ENSG00000103657 | 0.267512  | 5.196146 | 0.691909 | 1 HERC1         | K10594 |
| ENSG00000105698 | 0.262331  | 6.211902 | 0.692064 | 1 USF2          | K09106 |
| ENSG00000163110 | 0.26038   | 7.290989 | 0.692094 | 1 PDLIM5        | K17985 |
| ENSG00000033050 | -0.261466 | 6.627357 | 0.692099 | 1 ABCF2         | K06185 |
| ENSG00000147509 | -0.276546 | 3.672646 | 0.692202 | 1 RGS20         | K16449 |
| ENSG00000154723 | -0.260528 | 7.038613 | 0.692433 | 1 ATP5J         | K02131 |
| ENSG00000100239 | -0.263419 | 6.099318 | 0.692447 | 1 PPP6R2        | K15500 |
| ENSG00000108219 | -0.263444 | 5.021918 | 0.69249  | 1 TSPAN14       | K17296 |
| ENSG00000158156 | -0.295072 | 2.705857 | 0.692544 | 1 XKR8          | -      |
| ENSG00000124279 | -0.263404 | 5.537829 | 0.692625 | 1 FASTKD3       | -      |
| ENSG00000104047 | -0.2623   | 6.140883 | 0.692669 | 1 DTWD1         | K17934 |
| ENSG00000103024 | -0.263642 | 5.785051 | 0.692737 | 1 NME3          | K00940 |
| ENSG00000176720 | -0.270617 | 4.688165 | 0.692803 | 1 BOK           | K02561 |
| ENSG00000110906 | 0.26223   | 5.746132 | 0.692876 | 1 KCTD10        | K15074 |
| ENSG00000165819 | -0.262766 | 5.611355 | 0.692888 | 1 METTL3        | K05925 |
| ENSG00000003989 | 0.260932  | 5.609818 | 0.692888 | 1 SLC7A2        | K13864 |
| ENSG00000181396 | 0.263979  | 5.292283 | 0.69292  | 1 OGFOD3        | -      |
| ENSG00000174695 | -0.259539 | 7.474646 | 0.692976 | 1 TMEM167A      | -      |
| ENSG00000115944 | 0.259877  | 6.901286 | 0.693177 | 1 COX7A2L       | K02270 |
| ENSG00000105559 | -0.304506 | 2.480949 | 0.693272 | 1 PLEKHA4       | -      |
| ENSG00000026508 | 0.258185  | 9.086696 | 0.693371 | 1 CD44          | K06256 |
| ENSG00000182544 | -0.261727 | 5.481096 | 0.693405 | 1 MFSD5         | -      |
| ENSG00000085274 | -0.270789 | 4.518872 | 0.693457 | 1 MYNN          | K09228 |
| ENSG00000055044 | -0.259301 | 7.287135 | 0.693467 | 1 NOP58         | K14565 |
| ENSG00000110696 | -0.259234 | 7.29831  | 0.693528 | 1 C11orf58      | -      |
| ENSG00000166478 | 0.266778  | 4.740874 | 0.693548 | 1 ZNF143        | -      |
| ENSG00000142252 | -0.265768 | 5.110812 | 0.693665 | 1 GEMIN7        | K13135 |
| ENSG00000122068 | 0.261439  | 5.976269 | 0.693694 | 1 FYTTD1        | K10408 |
| ENSG00000103196 | 0.307841  | 2.326077 | 0.693717 | 1 CRISPLD2      | -      |
| ENSG00000116883 | 0.288257  | 2.335536 | 0.693717 | 1 RP11-268J15.5 | K17985 |

|                 |           |          |          |                  |        |
|-----------------|-----------|----------|----------|------------------|--------|
| ENSG00000198707 | -0.266691 | 4.87142  | 0.693911 | 1 CEP290         | K16533 |
| ENSG00000134758 | -0.265386 | 5.171629 | 0.694113 | 1 RNF138         | K10668 |
| ENSG00000197444 | -0.300284 | 2.20414  | 0.694234 | 1 OGDHL          | K00164 |
| ENSG00000173960 | -0.274988 | 4.329242 | 0.694292 | 1 UBXN2A         | K04613 |
| ENSG00000132824 | 0.258681  | 7.050839 | 0.694307 | 1 SERINC3        | -      |
| ENSG00000118705 | 0.257198  | 9.117451 | 0.694474 | 1 RPN2           | K12667 |
| ENSG00000084112 | 0.263985  | 5.091868 | 0.694481 | 1 SSH1           | K05766 |
| ENSG00000143322 | 0.259659  | 6.117661 | 0.694581 | 1 ABL2           | K08887 |
| ENSG00000035115 | 0.325324  | 2.036267 | 0.694839 | 1 SH3YL1         | K14404 |
| ENSG00000122862 | -0.259098 | 6.555138 | 0.694905 | 1 SRGN           | K06849 |
| ENSG00000100749 | -0.260625 | 5.408696 | 0.694914 | 1 VRK1           | K08816 |
| ENSG00000090097 | 0.281595  | 3.503444 | 0.694932 | 1 PCBP4          | K13162 |
| ENSG00000138175 | 0.264189  | 4.987783 | 0.695    | 1 ARL3           | K07944 |
| ENSG00000179889 | 0.25809   | 7.01496  | 0.695021 | 1 PDXDC1         | -      |
| ENSG00000164576 | 0.261464  | 5.782482 | 0.695058 | 1 SAP30L         | K19202 |
| ENSG00000105258 | -0.268743 | 4.804028 | 0.695128 | 1 POLR2I         | K03017 |
| ENSG00000115970 | -0.268363 | 4.616743 | 0.695144 | 1 THADA          | -      |
| ENSG00000159423 | 0.283718  | 3.444165 | 0.695242 | 1 ALDH4A1        | K00294 |
| ENSG00000167779 | -0.2718   | 3.454034 | 0.695242 | 1 IGFBP6         | -      |
| ENSG00000101000 | -0.26153  | 5.343301 | 0.695261 | 1 PROCR          | K06557 |
| ENSG00000128294 | 0.260091  | 5.212827 | 0.695286 | 1 TPST2          | K01021 |
| ENSG00000170185 | -0.263135 | 4.589679 | 0.695294 | 1 USP38          | K11854 |
| ENSG00000088205 | -0.257897 | 7.025235 | 0.69541  | 1 DDX18          | K13179 |
| ENSG00000136830 | 0.256439  | 8.69558  | 0.695489 | 1 FAM129B        | -      |
| ENSG00000162576 | -0.338651 | 1.886951 | 0.695557 | 1 MXRA8          | -      |
| ENSG00000251141 | -0.338651 | 1.886951 | 0.695557 | 1 RP11-53O19.1   | -      |
| ENSG00000233901 | -0.316342 | 1.873957 | 0.695557 | 1 RP11-65J3.1    | -      |
| ENSG00000105173 | -0.264035 | 4.532148 | 0.695611 | 1 CCNE1          | K06626 |
| ENSG00000197008 | -0.294116 | 2.822059 | 0.695707 | 1 ZNF138         | K09228 |
| ENSG00000198718 | -0.294116 | 2.822059 | 0.695707 | 1 FAM179B        | K09228 |
| ENSG00000160404 | -0.273894 | 3.746301 | 0.695748 | 1 TOR2A          | K01056 |
| ENSG00000154832 | 0.258054  | 6.555042 | 0.695819 | 1 CXXC1          | K14960 |
| ENSG00000148660 | 0.25824   | 6.431782 | 0.695857 | 1 CAMK2G         | K04515 |
| ENSG00000138382 | -0.258763 | 5.875131 | 0.695903 | 1 METTL5         | -      |
| ENSG00000179387 | -0.270492 | 4.266851 | 0.695911 | 1 ELMOD2         | -      |
| ENSG00000198917 | -0.262096 | 5.381633 | 0.696277 | 1 C9orf114       | K01173 |
| ENSG00000198839 | 0.260139  | 5.273112 | 0.696282 | 1 ZNF277         | -      |
| ENSG00000170791 | -0.258226 | 5.803214 | 0.696332 | 1 CHCHD7         | -      |
| ENSG00000143457 | -0.261462 | 5.463334 | 0.696367 | 1 GOLPH3L        | K15620 |
| ENSG00000107036 | 0.259546  | 5.363337 | 0.696378 | 1 KIAA1432       | -      |
| ENSG00000229124 | 0.333192  | 1.632724 | 0.696416 | 1 VIM-AS1        | -      |
| ENSG00000146963 | -0.258517 | 6.047289 | 0.6965   | 1 C7orf55-LUC7L2 | K13212 |
| ENSG00000172939 | -0.259573 | 5.841912 | 0.696545 | 1 OXSR1          | K08835 |
| ENSG00000153317 | -0.258276 | 6.318242 | 0.696552 | 1 ASAP1          | K12488 |
| ENSG00000197586 | -0.261768 | 5.222962 | 0.696616 | 1 ENTPD6         | K01511 |
| ENSG00000133193 | 0.262378  | 5.102134 | 0.69665  | 1 FAM104A        | -      |
| ENSG00000054690 | 0.277146  | 3.575227 | 0.6967   | 1 PLEKHH1        | -      |
| ENSG00000124171 | -0.278291 | 3.18203  | 0.696788 | 1 PARD6B         | K06093 |
| ENSG00000226752 | -0.278291 | 3.18203  | 0.696788 | 1 PSMD5-AS1      | -      |
| ENSG00000159445 | -0.25984  | 5.298367 | 0.696806 | 1 THEM4          | K16339 |
| ENSG00000131504 | 0.255726  | 7.63882  | 0.696974 | 1 DIAPH1         | K05740 |
| ENSG00000132254 | 0.256128  | 7.164457 | 0.697031 | 1 ARFIP2         | -      |
| ENSG00000082438 | -0.272344 | 3.524298 | 0.697067 | 1 COBLL1         | -      |
| ENSG00000120925 | -0.272344 | 3.524298 | 0.697067 | 1 RNF170         | K15707 |
| ENSG00000163703 | 0.270881  | 4.069348 | 0.697075 | 1 CRELD1         | -      |
| ENSG00000123240 | 0.256581  | 6.754871 | 0.697117 | 1 OPTN           | -      |
| ENSG00000055483 | 0.258962  | 6.17104  | 0.697164 | 1 USP36          | K11855 |
| ENSG00000197296 | 0.290061  | 3.089374 | 0.697275 | 1 FITM2          | K12581 |

|                 |           |           |          |                  |        |
|-----------------|-----------|-----------|----------|------------------|--------|
| ENSG00000172594 | 0.278671  | 3.094785  | 0.697275 | 1 SMPDL3A        | K01128 |
| ENSG00000214826 | -0.2649   | 4.598757  | 0.697338 | 1 DDX12P         | K11273 |
| ENSG00000152193 | -0.265244 | 4.863913  | 0.697436 | 1 RNF219         | -      |
| ENSG00000189280 | -0.344399 | 1.444765  | 0.697454 | 1 GJB5           | K07624 |
| ENSG00000118564 | -0.259101 | 5.189737  | 0.697531 | 1 FBXL5          | K10271 |
| ENSG00000153107 | -0.256939 | 6.213528  | 0.697583 | 1 ANAPC1         | K03348 |
| ENSG00000148154 | -0.258714 | 5.987099  | 0.697687 | 1 UGCG           | K00720 |
| ENSG00000124767 | -0.254756 | 7.970395  | 0.697895 | 1 GLO1           | K01759 |
| ENSG00000102543 | -0.27051  | 3.699795  | 0.697928 | 1 CDADC1         | -      |
| ENSG00000077348 | 0.259381  | 5.484988  | 0.69793  | 1 EXOSC5         | K12590 |
| ENSG00000261221 | 0.257662  | 5.40331   | 0.697932 | 1 ZNF865         | K09228 |
| ENSG00000141232 | 0.254403  | 8.254689  | 0.698012 | 1 TOB1           | K14443 |
| ENSG00000047188 | -0.258216 | 5.920678  | 0.698166 | 1 YTHDC2         | -      |
| ENSG00000169891 | 0.265443  | 4.474778  | 0.698167 | 1 REPS2          | K12581 |
| ENSG00000118217 | -0.257121 | 5.967635  | 0.698237 | 1 ATF6           | K09054 |
| ENSG00000171503 | -0.269574 | 3.909697  | 0.698266 | 1 ETFDH          | K00311 |
| ENSG00000004059 | -0.255552 | 6.843802  | 0.698342 | 1 ARF5           | K07940 |
| ENSG00000154803 | 0.269194  | 4.079787  | 0.698522 | 1 FLCN           | K09594 |
| ENSG00000128731 | 0.256656  | 6.034357  | 0.698522 | 1 HERC2          | K10595 |
| ENSG00000179406 | 0.378046  | 1.130619  | 0.698707 | 1 LINC00174      | -      |
| ENSG00000258586 | 0.378046  | 1.130619  | 0.698707 | 1 RP5-1021I20.2  | -      |
| ENSG00000131471 | 0.331     | 1.153525  | 0.698707 | 1 AOC3           | K00276 |
| ENSG00000240036 | 0.331     | 1.153525  | 0.698707 | 1 RP11-587D21.1  | K02975 |
| ENSG00000272599 | 0.331     | 1.153525  | 0.698707 | 1 RP11-152N13.16 | -      |
| ENSG00000148120 | 0.265403  | 4.685652  | 0.698707 | 1 C9orf3         | K09606 |
| ENSG00000129292 | -0.260127 | 5.597853  | 0.698743 | 1 PHF20L1        | K18402 |
| ENSG00000113583 | -0.255518 | 6.608199  | 0.69882  | 1 C5orf15        | -      |
| ENSG00000169223 | 0.253746  | 7.964939  | 0.698943 | 1 LMAN2          | K10082 |
| ENSG00000081870 | -0.257212 | 6.257706  | 0.69895  | 1 HSPB11         | K19369 |
| ENSG00000065970 | 0.258693  | 5.25253   | 0.699098 | 1 FOXJ2          | K09403 |
| ENSG00000213523 | -0.257128 | 5.139663  | 0.699336 | 1 SRA1           | -      |
| ENSG00000105948 | -0.268431 | 4.456372  | 0.699513 | 1 TTC26          | K19685 |
| ENSG00000006432 | 0.268177  | 3.949484  | 0.699514 | 1 MAP3K9         | K04417 |
| ENSG00000007866 | 0.26676   | 4.278369  | 0.699708 | 1 TEAD3          | K09448 |
| ENSG00000084093 | -0.259518 | 5.078752  | 0.699833 | 1 REST           | K09222 |
| ENSG00000165494 | -0.257821 | 5.820371  | 0.699847 | 1 PCF11          | K14400 |
| ENSG00000185880 | -0.264109 | 4.253078  | 0.700009 | 1 TRIM69         | -      |
| ENSG00000197728 | -0.257488 | 5.220608  | 0.700051 | 1 RPS26          | K02976 |
| ENSG00000032444 | 0.254395  | 6.483719  | 0.700075 | 1 PNPLA6         | K14676 |
| ENSG00000178921 | -0.256659 | 5.942213  | 0.700091 | 1 PFAS           | K01952 |
| ENSG00000100596 | -0.261021 | 4.854843  | 0.700156 | 1 SPTLC2         | K00654 |
| ENSG00000174171 | 0.419542  | 0.79418   | 0.700163 | 1 RP11-23P13.6   | -      |
| ENSG00000183208 | 0.419542  | 0.79418   | 0.700163 | 1 GDPGP1         | K15630 |
| ENSG00000198003 | 0.419542  | 0.79418   | 0.700163 | 1 CCDC151        | K17639 |
| ENSG00000213240 | 0.419542  | 0.79418   | 0.700163 | 1 NOTCH2NL       | -      |
| ENSG00000228283 | 0.419542  | 0.79418   | 0.700163 | 1 KATNBL1P6      | -      |
| ENSG00000271361 | 0.419542  | 0.79418   | 0.700163 | 1 HTATSFP2       | -      |
| ENSG00000120949 | -0.405956 | 0.830285  | 0.700163 | 1 TNFRSF8        | K05145 |
| ENSG00000229334 | -0.405956 | 0.830285  | 0.700163 | 1 AC046143.3     | -      |
| ENSG00000156500 | 0.273985  | 3.403455  | 0.700181 | 1 FAM122C        | K17985 |
| ENSG00000135070 | -0.256908 | 5.884063  | 0.700182 | 1 ISCA1          | K13628 |
| ENSG00000181610 | -0.254442 | 6.531673  | 0.70019  | 1 MRPS23         | K17402 |
| ENSG00000076351 | -0.650888 | -0.265519 | 0.700311 | 1 SLC46A1        | K14613 |
| ENSG00000110944 | -0.650888 | -0.265519 | 0.700311 | 1 IL23A          | K05426 |
| ENSG00000135424 | -0.650888 | -0.265519 | 0.700311 | 1 ITGA7          | K06583 |
| ENSG00000155984 | -0.650888 | -0.265519 | 0.700311 | 1 TMEM185A       | -      |
| ENSG00000164418 | -0.650888 | -0.265519 | 0.700311 | 1 GRIK2          | K05202 |
| ENSG00000167971 | -0.650888 | -0.265519 | 0.700311 | 1 CASKIN1        | -      |

|                 |           |           |          |                 |        |
|-----------------|-----------|-----------|----------|-----------------|--------|
| ENSG00000169946 | -0.650888 | -0.265519 | 0.700311 | 1 ZFPM2         | K17442 |
| ENSG00000208772 | -0.650888 | -0.265519 | 0.700311 | 1 SNORD94       | -      |
| ENSG00000212237 | -0.650888 | -0.265519 | 0.700311 | 1 RNA5SP18      | -      |
| ENSG00000212673 | -0.650888 | -0.265519 | 0.700311 | 1 AL136115.1    | -      |
| ENSG00000228409 | -0.650888 | -0.265519 | 0.700311 | 1 CCT6P1        | K09498 |
| ENSG00000240303 | -0.650888 | -0.265519 | 0.700311 | 1 ACAD11        | K11730 |
| ENSG00000240906 | -0.650888 | -0.265519 | 0.700311 | 1 AP000356.1    | -      |
| ENSG00000251661 | -0.650888 | -0.265519 | 0.700311 | 1 RP11-326C3.11 | -      |
| ENSG00000262194 | -0.650888 | -0.265519 | 0.700311 | 1 CTD-3195I5.5  | -      |
| ENSG00000264109 | -0.650888 | -0.265519 | 0.700311 | 1 MIR4712       | -      |
| ENSG00000271754 | -0.650888 | -0.265519 | 0.700311 | 1 RP3-337H4.9   | -      |
| ENSG00000273192 | -0.650888 | -0.265519 | 0.700311 | 1 CITF22-1A6.3  | -      |
| ENSG00000168806 | -0.267868 | 4.213509  | 0.700325 | 1 LCMT2         | K15451 |
| ENSG00000111581 | -0.253157 | 7.294995  | 0.700377 | 1 NUP107        | K14301 |
| ENSG00000198626 | -0.331131 | 2.086217  | 0.700494 | 1 RYR2          | K04962 |
| ENSG00000240489 | -0.331131 | 2.086217  | 0.700494 | 1 SETP14        | K11290 |
| ENSG00000135046 | -0.251958 | 8.945117  | 0.700499 | 1 ANXA1         | K17091 |
| ENSG00000094975 | -0.264612 | 4.699984  | 0.700594 | 1 SUCO          | -      |
| ENSG00000253719 | -0.257524 | 5.678756  | 0.700626 | 1 ATXN7L3B      | K11363 |
| ENSG00000213199 | 0.269415  | 3.021282  | 0.700768 | 1 ASIC3         | K04830 |
| ENSG00000197256 | 0.257711  | 5.546405  | 0.700778 | 1 KANK2         | K15225 |
| ENSG00000147676 | -0.252769 | 7.251963  | 0.70087  | 1 MAL2          | -      |
| ENSG00000072401 | -0.256243 | 5.651128  | 0.700874 | 1 UBE2D1        | K06689 |
| ENSG00000234664 | -0.264754 | 4.135854  | 0.701007 | 1 HMGN2P5       | K11300 |
| ENSG00000175550 | -0.2533   | 6.765853  | 0.701017 | 1 DRAP1         | -      |
| ENSG00000166225 | 0.258633  | 4.750727  | 0.70104  | 1 FRS2          | K12461 |
| ENSG00000052126 | -0.258828 | 5.10699   | 0.701085 | 1 PLEKHA5       | -      |
| ENSG00000183856 | 0.254643  | 6.002519  | 0.701155 | 1 IQGAP3        | K05767 |
| ENSG00000197063 | 0.253161  | 6.0032    | 0.701155 | 1 MAFG          | K09037 |
| ENSG00000136045 | -0.253268 | 6.692362  | 0.701189 | 1 PWP1          | K14791 |
| ENSG00000205269 | -0.2593   | 4.833485  | 0.701222 | 1 TMEM170B      | -      |
| ENSG00000105516 | 0.258721  | 4.492481  | 0.701426 | 1 DBP           | K09056 |
| ENSG00000187778 | -0.254512 | 6.352429  | 0.70167  | 1 MCRS1         | K11674 |
| ENSG00000029364 | 0.254881  | 5.565073  | 0.701676 | 1 SLC39A9       | K14715 |
| ENSG00000074695 | 0.25098   | 8.627014  | 0.701687 | 1 LMAN1         | K10080 |
| ENSG00000163528 | -0.259922 | 4.785051  | 0.701692 | 1 CHCHD4        | K17782 |
| ENSG00000213015 | 0.257201  | 4.781389  | 0.701692 | 1 ZNF580        | -      |
| ENSG00000142227 | 0.252621  | 6.68061   | 0.701705 | 1 EMP3          | -      |
| ENSG00000261705 | -0.311052 | 2.519958  | 0.701744 | 1 RP11-61A14.2  | -      |
| ENSG00000104154 | -0.296862 | 2.51181   | 0.701744 | 1 SLC30A4       | K14691 |
| ENSG00000229036 | -0.296862 | 2.51181   | 0.701744 | 1 RP1-20N2.6    | -      |
| ENSG00000107104 | -0.255456 | 5.110792  | 0.701791 | 1 KANK1         | -      |
| ENSG00000256967 | 0.310067  | 1.879438  | 0.701882 | 1 RP11-273B20.1 | -      |
| ENSG00000184154 | -0.304219 | 1.920622  | 0.701882 | 1 LRTOMT        | -      |
| ENSG00000099821 | -0.251987 | 7.15233   | 0.701886 | 1 POLRMT        | K10908 |
| ENSG00000047634 | 0.253797  | 5.961534  | 0.701962 | 1 SCML1         | K11464 |
| ENSG00000081052 | 0.258247  | 5.209274  | 0.702193 | 1 COL4A4        | K06237 |
| ENSG00000110218 | -0.260588 | 4.734935  | 0.702194 | 1 PANX1         | K03443 |
| ENSG00000099399 | -0.254257 | 5.270259  | 0.702283 | 1 MAGEB2        | -      |
| ENSG00000131652 | -0.254344 | 5.324834  | 0.702365 | 1 THOC6         | K13175 |
| ENSG00000134352 | -0.251555 | 7.145232  | 0.702383 | 1 IL6ST         | K05060 |
| ENSG00000148300 | 0.287818  | 2.842777  | 0.702412 | 1 REXO4         | K18327 |
| ENSG00000105677 | -0.251661 | 6.988478  | 0.702493 | 1 TMEM147       | -      |
| ENSG00000164253 | -0.252572 | 6.257718  | 0.702638 | 1 WDR41         | -      |
| ENSG00000156052 | 0.252561  | 6.043697  | 0.702712 | 1 GNAQ          | K04634 |
| ENSG00000077514 | 0.252274  | 6.246986  | 0.702733 | 1 POLD3         | K03504 |
| ENSG00000160959 | -0.252721 | 5.968342  | 0.702743 | 1 LRRC14        | K10730 |
| ENSG00000176095 | 0.254979  | 5.133756  | 0.702983 | 1 IP6K1         | K07756 |

|                 |           |          |          |                 |        |
|-----------------|-----------|----------|----------|-----------------|--------|
| ENSG00000134138 | -0.264566 | 3.932778 | 0.703076 | 1 MEIS2         | K16670 |
| ENSG00000178982 | -0.250164 | 7.968672 | 0.703085 | 1 EIF3K         | K15028 |
| ENSG00000080189 | -0.257066 | 5.311661 | 0.703156 | 1 SLC35C2       | K15280 |
| ENSG00000134250 | 0.250362  | 7.500155 | 0.703162 | 1 NOTCH2        | K02599 |
| ENSG00000178974 | 0.253253  | 5.362274 | 0.703204 | 1 FBXO34        | K10311 |
| ENSG00000109861 | -0.250027 | 7.892002 | 0.703302 | 1 CTSC          | K01275 |
| ENSG00000196422 | -0.254132 | 5.911981 | 0.703344 | 1 PPP1R26       | K17565 |
| ENSG00000064687 | 0.250994  | 6.316943 | 0.703625 | 1 ABCA7         | K05645 |
| ENSG00000113273 | 0.277712  | 3.037196 | 0.703665 | 1 ARSB          | K01135 |
| ENSG00000136770 | 0.252444  | 6.123324 | 0.703733 | 1 DNAJC1        | K09521 |
| ENSG00000100567 | -0.250852 | 6.78585  | 0.703742 | 1 PSMA3         | K02727 |
| ENSG00000156232 | -0.282756 | 3.289153 | 0.703833 | 1 WHAMM         | -      |
| ENSG00000233966 | 0.268071  | 3.278016 | 0.703833 | 1 UBE2SP1       | K10583 |
| ENSG00000164305 | -0.253231 | 5.057848 | 0.703863 | 1 CASP3         | K02187 |
| ENSG00000136819 | -0.253022 | 6.041327 | 0.703932 | 1 C9orf78       | K17985 |
| ENSG00000140553 | 0.250511  | 6.768202 | 0.703938 | 1 UNC45A        | -      |
| ENSG00000106546 | -0.254086 | 5.736591 | 0.703951 | 1 AHR           | K09093 |
| ENSG00000069974 | 0.255225  | 4.89642  | 0.704057 | 1 RAB27A        | K07885 |
| ENSG00000197037 | -0.265212 | 3.98353  | 0.704139 | 1 ZSCAN25       | K09229 |
| ENSG00000150779 | -0.254375 | 5.224124 | 0.704148 | 1 TIMM8B        | K17780 |
| ENSG00000141076 | 0.254238  | 4.44291  | 0.704254 | 1 CIRH1A        | K14548 |
| ENSG00000176834 | -0.260353 | 4.720051 | 0.704301 | 1 VSIG10        | -      |
| ENSG00000148399 | -0.257275 | 4.797697 | 0.704313 | 1 DPH7          | K17868 |
| ENSG00000243147 | -0.251917 | 5.739056 | 0.704405 | 1 MRPL33        | K02913 |
| ENSG00000134602 | -0.249267 | 7.517642 | 0.704515 | 1 MST4          | K08838 |
| ENSG00000110367 | 0.280473  | 2.95467  | 0.704603 | 1 DDX6          | K12614 |
| ENSG00000213753 | -0.260301 | 4.513065 | 0.704618 | 1 CENPBD1P1     | K17985 |
| ENSG00000088888 | 0.259213  | 4.410215 | 0.704623 | 1 MAVS          | K12648 |
| ENSG00000196295 | 0.264053  | 3.784155 | 0.70465  | 1 AC005154.6    | -      |
| ENSG00000151348 | 0.251095  | 6.097905 | 0.704779 | 1 EXT2          | K02367 |
| ENSG00000074071 | -0.248778 | 7.786838 | 0.704806 | 1 MRPS34        | K17412 |
| ENSG00000137522 | -0.254511 | 4.483957 | 0.704978 | 1 RNF121        | K15698 |
| ENSG00000078246 | 0.254809  | 5.262862 | 0.704996 | 1 TULP3         | K19600 |
| ENSG00000175334 | -0.248777 | 7.585811 | 0.704999 | 1 BANF1         | -      |
| ENSG00000166189 | -0.252309 | 5.687286 | 0.705028 | 1 HPS6          | -      |
| ENSG00000083807 | -0.260903 | 4.029824 | 0.70513  | 1 SLC27A5       | K09229 |
| ENSG00000143622 | -0.261341 | 3.891998 | 0.705184 | 1 RIT1          | K07832 |
| ENSG00000077312 | 0.249197  | 6.804395 | 0.705365 | 1 SNRPA         | K11091 |
| ENSG00000173744 | 0.249211  | 6.620287 | 0.705663 | 1 AGFG1         | K15044 |
| ENSG00000093000 | 0.248597  | 7.046816 | 0.705686 | 1 NUP50         | K14295 |
| ENSG00000004975 | 0.250903  | 5.922971 | 0.705745 | 1 DVL2          | K02353 |
| ENSG00000100591 | -0.248402 | 7.28494  | 0.705763 | 1 AHSA1         | -      |
| ENSG00000100290 | 0.337137  | 1.468701 | 0.705766 | 1 BIK           | K18452 |
| ENSG00000109771 | 0.337137  | 1.468701 | 0.705766 | 1 LRP2BP        | K11447 |
| ENSG00000187066 | 0.337137  | 1.468701 | 0.705766 | 1 TMEM262       | -      |
| ENSG00000204758 | -0.326651 | 1.507164 | 0.705766 | 1 CTC-308K20.1  | -      |
| ENSG00000254429 | -0.297007 | 1.489911 | 0.705766 | 1 CTD-2562J17.7 | -      |
| ENSG00000259994 | -0.297007 | 1.489911 | 0.705766 | 1 RP11-305E6.4  | -      |
| ENSG00000114125 | -0.251811 | 5.664148 | 0.705833 | 1 RNF7          | K10611 |
| ENSG00000173575 | 0.249878  | 6.215419 | 0.705843 | 1 CHD2          | K11367 |
| ENSG00000143369 | 0.250957  | 4.666833 | 0.70587  | 1 ECM1          | -      |
| ENSG00000179361 | -0.267244 | 3.682785 | 0.705889 | 1 ARID3B        | -      |
| ENSG00000164318 | -0.251815 | 4.808661 | 0.706036 | 1 EGFLAM        | -      |
| ENSG00000150687 | 0.246725  | 9.993797 | 0.706108 | 1 PRSS23        | K09627 |
| ENSG00000186184 | 0.248347  | 6.909297 | 0.706164 | 1 POLR1D        | K03020 |
| ENSG00000100418 | -0.249991 | 6.188538 | 0.706202 | 1 DESI1         | -      |
| ENSG00000115840 | -0.258327 | 4.280345 | 0.706277 | 1 SLC25A12      | K15105 |
| ENSG00000180263 | 0.250038  | 5.044793 | 0.706291 | 1 FGD6          | K05724 |



|                 |           |          |          |               |        |
|-----------------|-----------|----------|----------|---------------|--------|
| ENSG00000089050 | -0.259264 | 4.554666 | 0.706323 | 1 RBBP9       | K07002 |
| ENSG00000163960 | 0.248403  | 6.062862 | 0.706355 | 1 UBXN7       | -      |
| ENSG00000146535 | -0.253289 | 5.622073 | 0.706363 | 1 GNA12       | K04346 |
| ENSG00000137409 | 0.247093  | 8.054333 | 0.706408 | 1 MTCH1       | K17885 |
| ENSG00000159720 | 0.251147  | 5.720536 | 0.706543 | 1 ATP6V0D1    | K02146 |
| ENSG00000170310 | -0.258647 | 4.040492 | 0.706586 | 1 STX8        | K08501 |
| ENSG00000013561 | -0.249319 | 6.25084  | 0.706768 | 1 RNF14       | K11971 |
| ENSG00000170876 | -0.249416 | 6.36153  | 0.706894 | 1 TMM43       | -      |
| ENSG00000137494 | 0.257191  | 4.123372 | 0.706927 | 1 ANKRD42     | K17593 |
| ENSG00000171097 | 0.25385   | 4.982266 | 0.707133 | 1 CCBL1       | K00816 |
| ENSG00000162073 | -0.249007 | 5.944362 | 0.707173 | 1 PAQR4       | K06633 |
| ENSG00000159388 | 0.253738  | 4.782998 | 0.707222 | 1 BTG2        | K14443 |
| ENSG00000174915 | 0.248878  | 6.022908 | 0.707275 | 1 PTDSS2      | K08730 |
| ENSG00000136868 | -0.24785  | 6.59197  | 0.707502 | 1 SLC31A1     | K14686 |
| ENSG00000255302 | -0.246415 | 7.613601 | 0.707646 | 1 EID1        | K17449 |
| ENSG00000174442 | -0.2475   | 6.720903 | 0.707648 | 1 ZWILCH      | K11579 |
| ENSG00000165304 | -0.247158 | 6.944006 | 0.707653 | 1 MELK        | K08799 |
| ENSG00000104497 | -0.271198 | 3.380166 | 0.707692 | 1 SNX16       | K17928 |
| ENSG00000172339 | 0.270275  | 3.374202 | 0.707692 | 1 ALG14       | K07441 |
| ENSG00000119596 | -0.253391 | 4.816462 | 0.707739 | 1 YLPM1       | K17602 |
| ENSG00000185222 | -0.246515 | 7.376899 | 0.707789 | 1 WBP5        | -      |
| ENSG00000117751 | -0.249353 | 5.658957 | 0.707913 | 1 PPP1R8      | K13216 |
| ENSG00000159753 | 0.301076  | 1.926646 | 0.707955 | 1 RLTPR       | -      |
| ENSG00000135378 | 0.262058  | 3.796869 | 0.70807  | 1 PRRG4       | K12581 |
| ENSG00000224597 | 0.262058  | 3.796869 | 0.70807  | 1 PTCHD3P1    | -      |
| ENSG00000116685 | 0.247197  | 6.539041 | 0.708092 | 1 KIAA2013    | -      |
| ENSG00000131153 | -0.249096 | 5.744789 | 0.708169 | 1 GINS2       | K10733 |
| ENSG00000106993 | -0.256745 | 4.845716 | 0.708237 | 1 CDC37L1     | -      |
| ENSG00000157800 | -0.24935  | 5.443335 | 0.708278 | 1 SLC37A3     | K03447 |
| ENSG00000119682 | -0.252343 | 4.896594 | 0.70838  | 1 AREL1       | -      |
| ENSG00000180370 | -0.247022 | 6.591519 | 0.708439 | 1 PAK2        | K04410 |
| ENSG00000122966 | 0.247333  | 5.616091 | 0.708505 | 1 CIT         | K16308 |
| ENSG00000033800 | 0.251419  | 4.94142  | 0.708513 | 1 PIAS1       | K04706 |
| ENSG00000163682 | -0.245341 | 8.011937 | 0.708517 | 1 RPL9        | K02940 |
| ENSG00000168769 | -0.258539 | 3.315342 | 0.708627 | 1 TET2        | -      |
| ENSG00000065057 | -0.250348 | 5.322643 | 0.708807 | 1 NTHL1       | K10773 |
| ENSG00000124104 | -0.277212 | 2.894194 | 0.708834 | 1 SNX21       | K17932 |
| ENSG00000172239 | -0.244787 | 8.251706 | 0.708979 | 1 PAIP1       | K14322 |
| ENSG00000090615 | 0.246081  | 6.713592 | 0.70904  | 1 GOLGA3      | -      |
| ENSG00000119943 | 0.301254  | 2.263874 | 0.709088 | 1 PYROXD2     | -      |
| ENSG00000180423 | 0.280838  | 2.273774 | 0.709088 | 1 HARBI1      | K12581 |
| ENSG00000237214 | 0.246712  | 5.951624 | 0.709111 | 1 RP11-12M9.3 | K02997 |
| ENSG00000134690 | -0.2473   | 5.606875 | 0.709199 | 1 CDCA8       | K11514 |
| ENSG00000020577 | 0.253318  | 4.502233 | 0.709211 | 1 SAMD4A      | -      |
| ENSG00000099256 | -0.257971 | 4.259905 | 0.709234 | 1 PRTFDC1     | -      |
| ENSG00000214087 | -0.250818 | 5.108245 | 0.709261 | 1 ARL16       | K09228 |
| ENSG00000165792 | -0.246878 | 5.653747 | 0.709533 | 1 METTL17     | -      |
| ENSG00000175087 | -0.255257 | 3.706309 | 0.709539 | 1 PDIK1L      | K17539 |
| ENSG00000087460 | 0.243562  | 10.32122 | 0.70965  | 1 GNAS        | K04632 |
| ENSG00000134852 | -0.256138 | 4.476114 | 0.709671 | 1 CLOCK       | -      |
| ENSG00000132953 | -0.249916 | 5.346527 | 0.709732 | 1 XPO4        | -      |
| ENSG00000099949 | -0.248024 | 5.499611 | 0.709738 | 1 LZTR1       | -      |
| ENSG00000162664 | -0.24682  | 6.274807 | 0.709758 | 1 ZNF326      | K13204 |
| ENSG00000108786 | 0.284528  | 2.545346 | 0.709771 | 1 HSD17B1     | K00044 |
| ENSG00000143995 | -0.282556 | 2.57164  | 0.709771 | 1 MEIS1       | K15613 |
| ENSG00000174928 | -0.268772 | 2.563791 | 0.709771 | 1 C3orf33     | K08857 |
| ENSG00000158169 | -0.253098 | 4.802399 | 0.709795 | 1 FANCC       | K10890 |
| ENSG00000041988 | 0.253839  | 4.599601 | 0.7099   | 1 THAP3       | -      |

|                 |           |          |          |                  |        |
|-----------------|-----------|----------|----------|------------------|--------|
| ENSG00000114331 | -0.247361 | 5.980891 | 0.70992  | 1 ACAP2          | K12489 |
| ENSG00000197798 | 0.262909  | 3.909213 | 0.709934 | 1 FAM118B        | -      |
| ENSG00000089154 | 0.244056  | 7.940965 | 0.709935 | 1 GCN1L1         | -      |
| ENSG00000167778 | 0.24855   | 5.108539 | 0.70995  | 1 SPRYD3         | -      |
| ENSG00000139842 | 0.243499  | 8.701106 | 0.710138 | 1 CUL4A          | K10609 |
| ENSG00000179833 | 0.245372  | 6.286314 | 0.710233 | 1 SERTAD2        | -      |
| ENSG00000132300 | -0.244468 | 7.241039 | 0.710276 | 1 PTCF3          | K17659 |
| ENSG00000139625 | 0.261068  | 3.761721 | 0.710514 | 1 MAP3K12        | K04423 |
| ENSG00000184014 | 0.244498  | 6.879386 | 0.710568 | 1 DENND5A        | -      |
| ENSG00000148484 | -0.248583 | 5.331373 | 0.710584 | 1 RSU1           | -      |
| ENSG00000198900 | -0.245238 | 6.505424 | 0.710637 | 1 TOP1           | K03163 |
| ENSG00000084731 | 0.257333  | 3.867791 | 0.71065  | 1 KIF3C          | K10394 |
| ENSG00000150787 | -0.247456 | 5.825028 | 0.710682 | 1 PTS            | K01737 |
| ENSG00000079785 | -0.243673 | 7.680911 | 0.710691 | 1 DDX1           | K13177 |
| ENSG00000106086 | -0.251469 | 4.856323 | 0.710705 | 1 PLEKHA8        | K08051 |
| ENSG00000145817 | -0.244933 | 6.31828  | 0.710722 | 1 YIPF5          | K17985 |
| ENSG00000125912 | -0.244198 | 7.109231 | 0.71076  | 1 NCLN           | -      |
| ENSG00000111331 | -0.247346 | 5.703354 | 0.710761 | 1 OAS3           | K14216 |
| ENSG00000087995 | -0.249387 | 5.236953 | 0.710777 | 1 METTL2A        | K15696 |
| ENSG00000176842 | -0.269367 | 3.176999 | 0.710784 | 1 IRX5           | -      |
| ENSG00000164062 | -0.244273 | 6.990577 | 0.710849 | 1 APEH           | K01303 |
| ENSG00000138764 | 0.254154  | 4.14341  | 0.71096  | 1 CCNG2          | K10146 |
| ENSG00000170113 | 0.245008  | 6.086307 | 0.710961 | 1 NIPA1          | K19364 |
| ENSG00000177463 | 0.262377  | 3.313867 | 0.710968 | 1 NR2C2          | K08544 |
| ENSG00000169251 | -0.243667 | 7.393942 | 0.710999 | 1 NMD3           | K07562 |
| ENSG00000145545 | -0.245053 | 6.430714 | 0.71101  | 1 SRD5A1         | K12343 |
| ENSG00000024862 | -0.261007 | 3.465797 | 0.711114 | 1 CCDC28A        | -      |
| ENSG00000198538 | -0.263024 | 3.602009 | 0.711232 | 1 ZNF28          | K09228 |
| ENSG00000111144 | -0.243691 | 7.162799 | 0.711261 | 1 LTA4H          | K01254 |
| ENSG00000205581 | -0.242656 | 8.459624 | 0.711277 | 1 HMGN1          | K11299 |
| ENSG00000077238 | 0.247402  | 5.472188 | 0.711283 | 1 IL4R           | K05071 |
| ENSG00000166348 | 0.24799   | 4.511918 | 0.711284 | 1 USP54          | K11447 |
| ENSG00000127191 | 0.24379   | 6.868528 | 0.711387 | 1 TRAF2          | K03173 |
| ENSG00000130396 | 0.247018  | 5.554833 | 0.711593 | 1 MLLT4          | K05702 |
| ENSG00000197780 | -0.243897 | 5.991265 | 0.711792 | 1 TAF13          | K03127 |
| ENSG00000213463 | -0.282599 | 2.698744 | 0.711807 | 1 SYNJ2BP        | -      |
| ENSG00000188342 | -0.244231 | 6.003607 | 0.711981 | 1 GTF2F2         | K03139 |
| ENSG00000177731 | -0.242579 | 7.598556 | 0.712014 | 1 FLII           | -      |
| ENSG00000139112 | 0.242214  | 7.943811 | 0.712025 | 1 GABARAPL1      | K08341 |
| ENSG00000144158 | 0.244929  | 5.763191 | 0.71213  | 1 RP11-395L14.17 | K11092 |
| ENSG00000174437 | 0.241852  | 8.31556  | 0.7122   | 1 ATP2A2         | K05853 |
| ENSG00000120008 | -0.244162 | 6.344395 | 0.712206 | 1 WDR11          | -      |
| ENSG00000129566 | -0.26387  | 3.880173 | 0.712245 | 1 TEP1           | K11127 |
| ENSG00000175066 | -0.250954 | 4.315922 | 0.712295 | 1 GK5            | K19583 |
| ENSG00000148688 | -0.248816 | 5.341132 | 0.712341 | 1 RPP30          | K03539 |
| ENSG00000100612 | -0.246839 | 5.34005  | 0.712341 | 1 DHRS7          | K11165 |
| ENSG00000108771 | -0.37392  | 0.924574 | 0.71239  | 1 DHX58          | K12649 |
| ENSG00000232093 | -0.37392  | 0.924574 | 0.71239  | 1 RP11-307C12.11 | -      |
| ENSG00000259250 | -0.37392  | 0.924574 | 0.71239  | 1 RP11-50C13.1   | -      |
| ENSG00000166455 | -0.32836  | 0.897896 | 0.71239  | 1 C16orf46       | -      |
| ENSG00000079246 | -0.241576 | 8.625983 | 0.712418 | 1 XRCC5          | K10885 |
| ENSG00000205544 | -0.245965 | 5.848028 | 0.712553 | 1 TMEM256        | -      |
| ENSG00000156990 | -0.245364 | 5.625631 | 0.712585 | 1 RPUF3          | -      |
| ENSG00000233476 | 0.242171  | 7.31178  | 0.712646 | 1 EEF1A1P6       | K03231 |
| ENSG00000127564 | -0.243548 | 6.458879 | 0.712651 | 1 PKMYT1         | K06633 |
| ENSG00000083312 | -0.241736 | 7.942958 | 0.712665 | 1 TNPO1          | K18752 |
| ENSG00000134986 | 0.2511    | 4.351273 | 0.712871 | 1 NREP           | -      |
| ENSG00000117335 | 0.241022  | 8.884508 | 0.712882 | 1 CD46           | K04007 |

|                 |           |          |          |              |        |
|-----------------|-----------|----------|----------|--------------|--------|
| ENSG00000131873 | 0.243514  | 5.923682 | 0.712932 | 1 CHSY1      | K13499 |
| ENSG00000151503 | 0.242805  | 6.549844 | 0.713046 | 1 NCAPD3     | K11491 |
| ENSG00000213300 | -0.264702 | 3.726446 | 0.713101 | 1 HNRNPA3P6  | K12741 |
| ENSG00000163961 | 0.247623  | 4.866659 | 0.713131 | 1 RNF168     | K12581 |
| ENSG00000156802 | 0.241305  | 7.834181 | 0.713134 | 1 ATAD2      | K06115 |
| ENSG00000109670 | 0.258779  | 3.597441 | 0.713151 | 1 FBXW7      | -      |
| ENSG00000137692 | -0.244212 | 6.174671 | 0.713169 | 1 DCUN1D5    | K17824 |
| ENSG00000148481 | 0.247097  | 4.762145 | 0.713188 | 1 FAM188A    | -      |
| ENSG00000099984 | 0.265535  | 3.174975 | 0.713345 | 1 GSTT2      | K00799 |
| ENSG00000214293 | 0.265535  | 3.174975 | 0.713345 | 1 RSBN1L-AS1 | -      |
| ENSG00000138613 | 0.272986  | 2.99942  | 0.713429 | 1 APH1B      | K06172 |
| ENSG00000115042 | -0.246923 | 4.994653 | 0.71344  | 1 FAHD2A     | -      |
| ENSG00000128928 | -0.243181 | 5.987819 | 0.713466 | 1 IVD        | K00253 |
| ENSG00000129084 | -0.241123 | 7.811463 | 0.713471 | 1 PSMA1      | K02725 |
| ENSG00000162129 | 0.246515  | 4.894973 | 0.713512 | 1 CLPB       | K03695 |
| ENSG00000172878 | 0.28269   | 2.799493 | 0.713524 | 1 METAP1D    | K01265 |
| ENSG00000175104 | -0.271063 | 2.808958 | 0.713524 | 1 TRAF6      | K03175 |
| ENSG00000067064 | -0.241505 | 7.325412 | 0.713535 | 1 IDI1       | K01823 |
| ENSG00000016391 | 0.295852  | 2.567317 | 0.713627 | 1 CHDH       | K00108 |
| ENSG00000174007 | 0.295852  | 2.567317 | 0.713627 | 1 CEP19      | K16801 |
| ENSG00000214029 | 0.279395  | 2.575238 | 0.713627 | 1 ZNF891     | K09228 |
| ENSG00000114648 | -0.261628 | 4.077327 | 0.713658 | 1 KLHL18     | K10455 |
| ENSG00000168282 | -0.290661 | 2.32267  | 0.71373  | 1 MGAT2      | K00736 |
| ENSG00000206527 | -0.241159 | 7.497218 | 0.713733 | 1 PTPLB      | K10703 |
| ENSG00000131848 | -0.31391  | 1.977994 | 0.713789 | 1 ZSCAN5A    | K11667 |
| ENSG00000117262 | -0.2929   | 1.965842 | 0.713789 | 1 GPR89A     | -      |
| ENSG00000108651 | -0.242083 | 6.714263 | 0.713797 | 1 UTP6       | K14557 |
| ENSG00000138430 | -0.241294 | 7.26603  | 0.713848 | 1 OLA1       | K06942 |
| ENSG00000185252 | -0.26544  | 3.784853 | 0.713924 | 1 ZNF74      | K09228 |
| ENSG00000235106 | -0.26544  | 3.784853 | 0.713924 | 1 LINC00094  | -      |
| ENSG00000122512 | -0.247813 | 4.874347 | 0.713932 | 1 PMS2       | K10858 |
| ENSG00000058056 | -0.245744 | 5.133416 | 0.714016 | 1 USP13      | K11836 |
| ENSG00000146834 | -0.243557 | 5.978816 | 0.714035 | 1 MEPCE      | K15190 |
| ENSG00000090273 | -0.240848 | 7.516249 | 0.714066 | 1 NUDC       | -      |
| ENSG00000148926 | -0.241766 | 6.689861 | 0.714203 | 1 ADM        | K12333 |
| ENSG00000168286 | -0.24382  | 5.44031  | 0.714246 | 1 THAP11     | K11512 |
| ENSG00000197324 | 0.241697  | 6.33552  | 0.714255 | 1 LRP10      | K02927 |
| ENSG00000140044 | -0.244697 | 5.404559 | 0.714291 | 1 JDP2       | K09033 |
| ENSG00000144120 | -0.248594 | 4.532058 | 0.71434  | 1 TMEM177    | -      |
| ENSG00000041357 | -0.239972 | 8.271857 | 0.714441 | 1 PSMA4      | K02728 |
| ENSG00000103653 | -0.242363 | 5.604178 | 0.714529 | 1 CSK        | K05728 |
| ENSG00000119559 | -0.253179 | 4.326896 | 0.714635 | 1 C19orf25   | K08671 |
| ENSG00000171703 | -0.245869 | 5.094196 | 0.714752 | 1 TCEA2      | K03145 |
| ENSG00000254999 | 0.241087  | 6.201743 | 0.714759 | 1 BRK1       | K05752 |
| ENSG00000197375 | 0.246075  | 5.275396 | 0.714771 | 1 SLC22A5    | K08202 |
| ENSG00000086065 | 0.239852  | 7.762587 | 0.714851 | 1 CHMP5      | K12198 |
| ENSG00000133858 | 0.240882  | 6.684414 | 0.714986 | 1 ZFC3H1     | -      |
| ENSG00000092140 | -0.244144 | 5.115833 | 0.715054 | 1 G2E3       | -      |
| ENSG00000213949 | -0.240142 | 7.312523 | 0.7151   | 1 ITGA1      | K06480 |
| ENSG00000137807 | -0.240277 | 7.186466 | 0.715106 | 1 KIF23      | K17387 |
| ENSG00000134086 | -0.244867 | 5.544418 | 0.715127 | 1 VHL        | K03871 |
| ENSG00000198912 | -0.253978 | 4.365674 | 0.715145 | 1 C1orf174   | K17985 |
| ENSG00000138658 | 0.247143  | 4.287547 | 0.715287 | 1 C4orf21    | -      |
| ENSG00000163950 | 0.24009   | 7.069184 | 0.715305 | 1 SLBP       | K18710 |
| ENSG00000065183 | -0.240599 | 6.80129  | 0.715327 | 1 WDR3       | K14556 |
| ENSG00000177602 | 0.250652  | 4.466953 | 0.71548  | 1 GSG2       | K16315 |
| ENSG00000137776 | -0.24033  | 6.86243  | 0.715528 | 1 SLTM       | -      |
| ENSG00000166902 | -0.240842 | 6.547259 | 0.715531 | 1 MRPL16     | K02878 |

|                 |           |          |          |                 |        |
|-----------------|-----------|----------|----------|-----------------|--------|
| ENSG00000171612 | -0.255599 | 4.130775 | 0.71562  | 1 SLC25A33      | K15116 |
| ENSG00000114030 | 0.240411  | 6.100443 | 0.715622 | 1 KPNA1         | K15042 |
| ENSG00000148498 | 0.240418  | 6.206505 | 0.715711 | 1 PARD3         | K04237 |
| ENSG00000167193 | 0.239812  | 6.928132 | 0.715817 | 1 CRK           | K04438 |
| ENSG00000067208 | -0.244226 | 5.076125 | 0.715828 | 1 EVI5          | -      |
| ENSG00000188613 | -0.260963 | 3.679278 | 0.715845 | 1 NANOS1        | K18741 |
| ENSG00000059691 | -0.247024 | 4.667515 | 0.716024 | 1 PET112        | K02434 |
| ENSG00000164081 | 0.244475  | 4.663404 | 0.716024 | 1 TEX264        | -      |
| ENSG00000124177 | 0.243505  | 5.429021 | 0.716169 | 1 CHD6          | K14436 |
| ENSG00000163161 | -0.240428 | 6.459387 | 0.716188 | 1 ERCC3         | K10843 |
| ENSG00000174099 | -0.241819 | 5.77311  | 0.716235 | 1 MSRB3         | K07305 |
| ENSG00000241015 | -0.291637 | 2.155305 | 0.716288 | 1 TPM3P9        | K09290 |
| ENSG00000100311 | 0.244656  | 5.007076 | 0.716354 | 1 PDGFB         | K17386 |
| ENSG00000028203 | -0.242494 | 5.719245 | 0.716387 | 1 VEZT          | -      |
| ENSG00000180900 | -0.244689 | 4.696518 | 0.7164   | 1 SCRIB         | K16175 |
| ENSG00000124383 | -0.242227 | 6.061822 | 0.716423 | 1 MPHOSPH10     | K14559 |
| ENSG00000117625 | -0.247318 | 4.479991 | 0.716522 | 1 RCOR3         | K11829 |
| ENSG00000125991 | 0.238304  | 7.83628  | 0.716555 | 1 ERGIC3        | -      |
| ENSG00000120685 | -0.241466 | 5.288295 | 0.716568 | 1 PROSER1       | -      |
| ENSG00000129003 | 0.242125  | 5.467235 | 0.716607 | 1 VPS13C        | K19525 |
| ENSG00000128567 | -0.237997 | 8.406031 | 0.71661  | 1 PODXL         | K06817 |
| ENSG00000166181 | -0.238633 | 7.42769  | 0.716682 | 1 API5          | -      |
| ENSG00000164008 | -0.265593 | 2.833633 | 0.716751 | 1 C1orf50       | -      |
| ENSG00000175634 | -0.242164 | 5.882601 | 0.716756 | 1 RPS6KB2       | K04688 |
| ENSG00000159202 | -0.23881  | 7.200241 | 0.716757 | 1 UBE2Z         | K10585 |
| ENSG00000118777 | -0.239522 | 6.665909 | 0.716795 | 1 ABCG2         | K05681 |
| ENSG00000144589 | -0.266189 | 3.279825 | 0.716872 | 1 STK11IP       | -      |
| ENSG00000157954 | 0.239252  | 6.646345 | 0.716904 | 1 WIPI2         | K17908 |
| ENSG00000134265 | -0.248179 | 4.514911 | 0.716937 | 1 NAPG          | -      |
| ENSG00000146066 | 0.239458  | 6.263619 | 0.716968 | 1 HIGD2A        | -      |
| ENSG00000213619 | -0.239021 | 6.841578 | 0.71705  | 1 NDUFS3        | K03936 |
| ENSG00000143126 | 0.240294  | 6.119512 | 0.717111 | 1 CELSR2        | K04601 |
| ENSG00000136521 | -0.239187 | 6.667635 | 0.717173 | 1 NDUFB5        | K03961 |
| ENSG00000180979 | -0.251562 | 4.048386 | 0.717213 | 1 LRRC57        | K02927 |
| ENSG00000142864 | -0.23693  | 10.3048  | 0.717226 | 1 SERBP1        | K13199 |
| ENSG00000125124 | -0.241972 | 5.439301 | 0.717244 | 1 BBS2          | K16747 |
| ENSG00000167987 | -0.248521 | 3.803586 | 0.717256 | 1 VPS37C        | K12185 |
| ENSG00000168036 | -0.237416 | 8.255336 | 0.717363 | 1 CTNNB1        | K02105 |
| ENSG00000156508 | 0.236595  | 13.04456 | 0.717418 | 1 EEF1A1        | K03231 |
| ENSG00000158092 | 0.238619  | 6.724815 | 0.717489 | 1 NCK1          | K07365 |
| ENSG00000185298 | -0.240142 | 6.238153 | 0.717526 | 1 CCDC137       | K09228 |
| ENSG00000136156 | 0.237174  | 8.264191 | 0.717557 | 1 ITM2B         | K18264 |
| ENSG00000055130 | -0.238151 | 7.107353 | 0.717632 | 1 CUL1          | K03347 |
| ENSG00000181625 | -0.480515 | 0.467836 | 0.717697 | 1 SLX1B         | K15078 |
| ENSG00000225159 | -0.480515 | 0.467836 | 0.717697 | 1 NPM1P39       | K11276 |
| ENSG00000240889 | -0.480515 | 0.467836 | 0.717697 | 1 NDUFB2-AS1    | -      |
| ENSG00000130305 | 0.407335  | 0.39556  | 0.717697 | 1 NSUN5         | K15264 |
| ENSG00000149571 | 0.407335  | 0.39556  | 0.717697 | 1 KIRREL3       | -      |
| ENSG00000166813 | 0.407335  | 0.39556  | 0.717697 | 1 KIF7          | K18806 |
| ENSG00000180769 | 0.407335  | 0.39556  | 0.717697 | 1 WDFY3-AS2     | -      |
| ENSG00000187186 | 0.407335  | 0.39556  | 0.717697 | 1 RP11-195F19.5 | K16598 |
| ENSG00000233224 | 0.407335  | 0.39556  | 0.717697 | 1 HIST1H2AM     | K11251 |
| ENSG00000267475 | 0.407335  | 0.39556  | 0.717697 | 1 CTD-2538C1.2  | -      |
| ENSG00000008086 | 0.325658  | 0.434874 | 0.717697 | 1 CDKL5         | K08824 |
| ENSG00000138735 | 0.325658  | 0.434874 | 0.717697 | 1 PDE5A         | K13762 |
| ENSG00000151320 | 0.325658  | 0.434874 | 0.717697 | 1 AKAP6         | K16523 |
| ENSG00000182600 | 0.325658  | 0.434874 | 0.717697 | 1 C2orf82       | -      |
| ENSG00000204710 | 0.325658  | 0.434874 | 0.717697 | 1 SPDYC         | K08694 |

|                 |           |          |          |                |        |
|-----------------|-----------|----------|----------|----------------|--------|
| ENSG00000153560 | -0.238582 | 5.938678 | 0.717749 | 1 UBP1         | K09275 |
| ENSG00000152404 | -0.243819 | 4.41573  | 0.717805 | 1 CWF19L2      | -      |
| ENSG00000009790 | -0.351849 | 1.291417 | 0.717848 | 1 TRAF3IP3     | -      |
| ENSG00000011332 | -0.351849 | 1.291417 | 0.717848 | 1 DPF1         | K13196 |
| ENSG00000245571 | -0.351849 | 1.291417 | 0.717848 | 1 AP001258.4   | -      |
| ENSG00000260912 | -0.351849 | 1.291417 | 0.717848 | 1 RP11-363E7.4 | -      |
| ENSG00000179954 | -0.317224 | 1.271154 | 0.717848 | 1 SSC5D        | -      |
| ENSG00000246228 | -0.317224 | 1.271154 | 0.717848 | 1 CASC8        | -      |
| ENSG00000023697 | -0.239878 | 5.460349 | 0.717979 | 1 DERA         | K01619 |
| ENSG00000101193 | 0.239514  | 5.457277 | 0.717979 | 1 GID8         | -      |
| ENSG00000108557 | 0.239137  | 6.14579  | 0.718028 | 1 RAI1         | K19749 |
| ENSG00000204977 | -0.245692 | 5.041961 | 0.718057 | 1 TRIM13       | K12003 |
| ENSG00000170190 | -0.248251 | 4.010788 | 0.718079 | 1 SLC16A5      | K08182 |
| ENSG00000187098 | -0.240645 | 5.425095 | 0.718113 | 1 MITF         | K09455 |
| ENSG00000142657 | -0.238458 | 6.578773 | 0.718174 | 1 PGD          | K00033 |
| ENSG00000138069 | 0.236854  | 7.838384 | 0.718206 | 1 RAB1A        | K07874 |
| ENSG00000087302 | -0.237061 | 7.565201 | 0.718326 | 1 C14orf166    | K15433 |
| ENSG00000132466 | 0.238258  | 6.442865 | 0.718417 | 1 ANKRD17      | K16726 |
| ENSG00000139514 | 0.237901  | 6.578133 | 0.718563 | 1 SLC7A1       | K13863 |
| ENSG00000177426 | -0.237747 | 6.766315 | 0.718629 | 1 TGIF1        | K19383 |
| ENSG00000196150 | 0.243095  | 4.18513  | 0.718708 | 1 ZNF250       | K09228 |
| ENSG00000197302 | -0.288726 | 2.732324 | 0.718752 | 1 ZNF720       | K09228 |
| ENSG00000167565 | -0.240723 | 4.767388 | 0.718807 | 1 SERTAD3      | -      |
| ENSG00000135457 | -0.239289 | 5.761046 | 0.718893 | 1 TFCP2        | K09275 |
| ENSG00000158161 | 0.249654  | 3.958193 | 0.718997 | 1 EYA3         | K17621 |
| ENSG00000121289 | -0.250485 | 4.105493 | 0.71908  | 1 CEP89        | K16543 |
| ENSG00000115947 | -0.243886 | 4.878808 | 0.719144 | 1 ORC4         | K02606 |
| ENSG00000174177 | -0.249072 | 4.234452 | 0.719148 | 1 CTU2         | K14169 |
| ENSG00000184675 | -0.243939 | 4.350646 | 0.719205 | 1 AMER1        | K19407 |
| ENSG00000261188 | 0.250151  | 3.503981 | 0.719314 | 1 CTA-445C9.14 | -      |
| ENSG00000102804 | -0.235426 | 8.85235  | 0.719325 | 1 TSC22D1      | -      |
| ENSG00000118816 | -0.236396 | 7.288363 | 0.719394 | 1 CCNI         | -      |
| ENSG00000137975 | 0.267646  | 1.984617 | 0.719399 | 1 CLCA2        | K05028 |
| ENSG00000167004 | 0.235063  | 9.899185 | 0.719406 | 1 PDIA3        | K08056 |
| ENSG00000185721 | -0.236812 | 6.930466 | 0.71942  | 1 DRG1         | K16489 |
| ENSG00000136718 | -0.239416 | 5.857891 | 0.719484 | 1 IMP4         | K14561 |
| ENSG00000162517 | -0.237643 | 6.009071 | 0.719518 | 1 PEF1         | -      |
| ENSG00000137054 | -0.240145 | 5.469276 | 0.71955  | 1 POLR1E       | K03005 |
| ENSG00000136783 | -0.25004  | 4.275762 | 0.719563 | 1 NIPSNAP3A    | -      |
| ENSG00000159792 | -0.248808 | 4.390918 | 0.719587 | 1 PSKH1        | K08808 |
| ENSG00000163512 | 0.246113  | 4.385316 | 0.719587 | 1 AZI2         | K12651 |
| ENSG00000109270 | -0.244968 | 4.388801 | 0.719587 | 1 LAMTOR3      | K04370 |
| ENSG00000108826 | -0.238714 | 5.53689  | 0.719729 | 1 MRPL27       | K02899 |
| ENSG00000055208 | 0.237215  | 6.287978 | 0.719769 | 1 TAB2         | K04404 |
| ENSG00000133069 | 0.265785  | 2.46892  | 0.719779 | 1 TMCC2        | K16288 |
| ENSG00000186272 | 0.265785  | 2.46892  | 0.719779 | 1 ZNF17        | K09228 |
| ENSG00000037474 | -0.234988 | 8.759578 | 0.719866 | 1 NSUN2        | K15335 |
| ENSG00000076053 | 0.240016  | 5.55109  | 0.719893 | 1 RBM7         | K13188 |
| ENSG00000205763 | 0.254348  | 3.366017 | 0.719973 | 1 RP9P         | K19604 |
| ENSG00000189159 | -0.23687  | 6.567737 | 0.720003 | 1 HN1          | -      |
| ENSG00000106244 | -0.235664 | 7.482378 | 0.720005 | 1 PDAP1        | K05757 |
| ENSG00000068745 | 0.239594  | 5.707141 | 0.720034 | 1 IP6K2        | K07756 |
| ENSG00000158864 | -0.236013 | 7.111803 | 0.720061 | 1 NDUFS2       | K03935 |
| ENSG00000107874 | -0.237078 | 6.424121 | 0.720072 | 1 CUEDC2       | -      |
| ENSG00000170260 | 0.246441  | 4.353457 | 0.720325 | 1 ZNF212       | K09228 |
| ENSG00000108423 | -0.243761 | 4.113045 | 0.720404 | 1 TUBD1        | K10390 |
| ENSG00000257671 | 0.253282  | 3.812687 | 0.720512 | 1 RP3-416H24.1 | -      |
| ENSG00000197451 | -0.234755 | 8.018936 | 0.720561 | 1 HNRNPAB      | K13044 |

|                 |           |          |          |                 |        |
|-----------------|-----------|----------|----------|-----------------|--------|
| ENSG00000155876 | 0.237465  | 5.976922 | 0.720609 | 1 RRAGA         | K16185 |
| ENSG00000072042 | -0.23605  | 6.701715 | 0.720677 | 1 RDH11         | K11152 |
| ENSG00000158435 | -0.235946 | 6.732939 | 0.720738 | 1 CNOT11        | -      |
| ENSG00000205765 | -0.236399 | 6.4594   | 0.720766 | 1 C5orf51       | K05080 |
| ENSG00000162980 | -0.23671  | 5.527423 | 0.72106  | 1 ARL5A         | K07949 |
| ENSG00000167216 | -0.338405 | 1.583299 | 0.721106 | 1 KATNAL2       | K07767 |
| ENSG00000180884 | -0.338405 | 1.583299 | 0.721106 | 1 ZNF792        | K09228 |
| ENSG00000197714 | -0.338405 | 1.583299 | 0.721106 | 1 ZNF460        | K09228 |
| ENSG00000197557 | -0.310482 | 1.567006 | 0.721106 | 1 TTC30A        | K19683 |
| ENSG00000142235 | 0.249515  | 3.705806 | 0.721136 | 1 LMTK3         | K08899 |
| ENSG00000125834 | 0.237965  | 4.659967 | 0.721144 | 1 STK35         | K08859 |
| ENSG00000095321 | 0.240695  | 4.935726 | 0.721171 | 1 CRAT          | K00624 |
| ENSG00000169919 | -0.236507 | 6.238743 | 0.721297 | 1 GUSB          | K01195 |
| ENSG00000109113 | -0.234524 | 7.414161 | 0.72138  | 1 RAB34         | K07921 |
| ENSG00000042088 | -0.246162 | 4.36136  | 0.721437 | 1 TDP1          | K10862 |
| ENSG00000145730 | 0.234505  | 7.21813  | 0.72148  | 1 PAM           | K00504 |
| ENSG00000161542 | -0.237165 | 5.829671 | 0.721505 | 1 PRPSAP1       | -      |
| ENSG00000153561 | 0.235847  | 6.133328 | 0.721625 | 1 RMND5A        | -      |
| ENSG00000099999 | 0.254019  | 3.765049 | 0.721645 | 1 RNF215        | -      |
| ENSG00000164054 | -0.23679  | 6.020591 | 0.721654 | 1 SHISA5        | K10135 |
| ENSG00000162434 | 0.233351  | 8.806591 | 0.721663 | 1 JAK1          | K11217 |
| ENSG00000146414 | -0.253592 | 3.05531  | 0.721753 | 1 SHPRH         | K15710 |
| ENSG00000187231 | 0.241904  | 4.631892 | 0.721783 | 1 SESTD1        | -      |
| ENSG00000189046 | -0.242757 | 4.838028 | 0.721801 | 1 ALKBH2        | K10859 |
| ENSG00000089737 | 0.234365  | 7.038428 | 0.721866 | 1 DDX24         | K14805 |
| ENSG00000166851 | 0.235041  | 6.537582 | 0.721893 | 1 PLK1          | K06631 |
| ENSG00000117906 | -0.234087 | 7.264639 | 0.722056 | 1 RCN2          | -      |
| ENSG00000140326 | 0.239058  | 4.434916 | 0.722062 | 1 CDAN1         | K19531 |
| ENSG00000135870 | -0.243024 | 4.1677   | 0.722085 | 1 RC3H1         | K15690 |
| ENSG00000156521 | -0.236797 | 5.705043 | 0.722097 | 1 TYSND1        | K10408 |
| ENSG00000272086 | 0.267083  | 2.73557  | 0.722103 | 1 CTD-2186M15.3 | -      |
| ENSG00000172375 | 0.261007  | 3.378602 | 0.722139 | 1 C2CD2L        | -      |
| ENSG00000106459 | -0.239392 | 4.328974 | 0.722233 | 1 NRF1          | K11831 |
| ENSG00000064042 | 0.233304  | 7.798493 | 0.722289 | 1 LIMCH1        | -      |
| ENSG00000122203 | 0.234413  | 6.712711 | 0.722298 | 1 KIAA1191      | -      |
| ENSG00000180773 | -0.24009  | 4.476014 | 0.722351 | 1 SLC36A4       | K14209 |
| ENSG00000068912 | -0.235815 | 6.370598 | 0.722378 | 1 ERLEC1        | K14008 |
| ENSG00000143569 | 0.233303  | 7.617623 | 0.722442 | 1 UBAP2L        | -      |
| ENSG00000148840 | 0.234482  | 6.562413 | 0.722483 | 1 PPRC1         | K17963 |
| ENSG00000032219 | 0.240588  | 4.364197 | 0.72254  | 1 ARID4A        | K19194 |
| ENSG00000008710 | 0.234186  | 6.714384 | 0.722555 | 1 PKD1          | K04985 |
| ENSG00000137166 | 0.237292  | 5.337525 | 0.722558 | 1 FOXP4         | K09409 |
| ENSG00000125650 | 0.268935  | 2.344925 | 0.722591 | 1 PSPN          | -      |
| ENSG00000196378 | 0.268935  | 2.344925 | 0.722591 | 1 ZNF34         | K09228 |
| ENSG00000132182 | 0.233165  | 7.526027 | 0.722684 | 1 NUP210        | K14314 |
| ENSG00000152749 | -0.23977  | 5.044604 | 0.722705 | 1 GPR180        | -      |
| ENSG00000083099 | -0.242116 | 4.545217 | 0.722888 | 1 LYRM2         | -      |
| ENSG00000106333 | -0.271526 | 2.864235 | 0.722995 | 1 PCOLCE        | -      |
| ENSG00000186230 | -0.271526 | 2.864235 | 0.722995 | 1 ZNF749        | -      |
| ENSG00000250565 | -0.271526 | 2.864235 | 0.722995 | 1 ATP6V1E2      | -      |
| ENSG00000108588 | 0.232771  | 7.676964 | 0.722998 | 1 CCDC47        | -      |
| ENSG00000128342 | -0.250999 | 4.128228 | 0.723017 | 1 LIF           | K05419 |
| ENSG00000089597 | 0.231987  | 9.442736 | 0.723021 | 1 GANAB         | K05546 |
| ENSG00000040341 | -0.233987 | 5.838124 | 0.723109 | 1 STAU2         | K17597 |
| ENSG00000166889 | 0.236205  | 5.902542 | 0.723218 | 1 PATL1         | K12617 |
| ENSG00000124795 | -0.231995 | 8.894221 | 0.72323  | 1 DEK           | K17046 |
| ENSG00000138231 | -0.235289 | 5.284922 | 0.723254 | 1 DBR1          | K18328 |
| ENSG00000179674 | -0.305963 | 1.812149 | 0.723265 | 1 ARL14         | K17200 |

|                 |           |           |          |                  |        |
|-----------------|-----------|-----------|----------|------------------|--------|
| ENSG00000231767 | -0.305963 | 1.812149  | 0.723265 | 1 MIR4426        | K02977 |
| ENSG00000100077 | 0.272519  | 1.808228  | 0.723265 | 1 ADRBK2         | K00910 |
| ENSG00000181061 | -0.234197 | 6.40668   | 0.723389 | 1 HIGD1A         | -      |
| ENSG00000067248 | -0.234754 | 5.958546  | 0.723593 | 1 DHX29          | K18995 |
| ENSG00000033011 | -0.239621 | 4.518688  | 0.723618 | 1 ALG1           | K03842 |
| ENSG00000270143 | 0.336493  | 0.92013   | 0.723661 | 1 AC004257.3     | -      |
| ENSG00000111642 | 0.231634  | 8.587496  | 0.72372  | 1 CHD4           | K11643 |
| ENSG00000187164 | -0.235327 | 5.773117  | 0.723824 | 1 KIAA1598       | -      |
| ENSG00000169607 | -0.234365 | 5.654626  | 0.723858 | 1 CKAP2L         | K16769 |
| ENSG00000157349 | -0.239301 | 4.259753  | 0.723942 | 1 DDX19B         | K18655 |
| ENSG00000206560 | -0.234205 | 6.201136  | 0.723954 | 1 ANKRD28        | K15502 |
| ENSG00000171055 | -0.234859 | 6.341724  | 0.724045 | 1 FEZ2           | -      |
| ENSG00000142002 | 0.235666  | 6.078512  | 0.724084 | 1 DPP9           | K08656 |
| ENSG00000151458 | -0.242865 | 4.739786  | 0.724232 | 1 ANKRD50        | -      |
| ENSG00000112855 | -0.23332  | 5.897389  | 0.724269 | 1 HARS2          | K01892 |
| ENSG00000159079 | -0.23322  | 5.732498  | 0.724371 | 1 C21orf59       | -      |
| ENSG00000168936 | -0.242153 | 4.485837  | 0.724379 | 1 TMEM129        | -      |
| ENSG00000080824 | -0.23061  | 10.72221  | 0.724399 | 1 HSP90AA1       | K04079 |
| ENSG00000100888 | 0.236099  | 5.670542  | 0.724411 | 1 CHD8           | K04494 |
| ENSG00000139180 | -0.234217 | 5.923608  | 0.724441 | 1 NDUFA9         | K03953 |
| ENSG00000099810 | -0.232261 | 7.009792  | 0.724487 | 1 MTAP           | K00772 |
| ENSG00000236801 | 0.239678  | 4.515811  | 0.724604 | 1 RPL24P8        | K02896 |
| ENSG00000139323 | -0.238901 | 4.934296  | 0.724691 | 1 POC1B          | K16482 |
| ENSG00000085377 | -0.234521 | 6.025311  | 0.724723 | 1 PREP           | K01322 |
| ENSG00000153044 | -0.232723 | 5.860919  | 0.724781 | 1 CENPH          | K11500 |
| ENSG00000188760 | 0.284776  | 2.016632  | 0.724796 | 1 TMEM198        | -      |
| ENSG00000185090 | -0.251097 | 3.791011  | 0.724924 | 1 MANEAL         | -      |
| ENSG00000135968 | -0.233075 | 5.706725  | 0.725043 | 1 GCC2           | K12172 |
| ENSG00000078814 | 0.517011  | -0.214446 | 0.725047 | 1 MYH7B          | K10352 |
| ENSG00000171877 | 0.517011  | -0.214446 | 0.725047 | 1 FRMD5          | -      |
| ENSG00000204169 | 0.517011  | -0.214446 | 0.725047 | 1 AGAP7          | K12491 |
| ENSG00000233961 | 0.517011  | -0.214446 | 0.725047 | 1 RP11-87H9.2    | K13122 |
| ENSG00000239246 | 0.517011  | -0.214446 | 0.725047 | 1 RP11-464D20.2  | K02947 |
| ENSG00000253882 | 0.517011  | -0.214446 | 0.725047 | 1 RP11-61L23.2   | -      |
| ENSG00000261126 | 0.517011  | -0.214446 | 0.725047 | 1 RBFADN         | -      |
| ENSG00000267281 | 0.517011  | -0.214446 | 0.725047 | 1 RP11-793H13.10 | K09045 |
| ENSG00000065621 | -0.440356 | -0.127832 | 0.725047 | 1 GSTO2          | K00799 |
| ENSG00000116819 | -0.440356 | -0.127832 | 0.725047 | 1 TFAP2E         | K09179 |
| ENSG00000143466 | -0.440356 | -0.127832 | 0.725047 | 1 IKBKE          | K07211 |
| ENSG00000187688 | -0.440356 | -0.127832 | 0.725047 | 1 TRPV2          | K04971 |
| ENSG00000188004 | -0.440356 | -0.127832 | 0.725047 | 1 C1orf204       | -      |
| ENSG00000196569 | -0.440356 | -0.127832 | 0.725047 | 1 LAMA2          | K05637 |
| ENSG00000200879 | -0.440356 | -0.127832 | 0.725047 | 1 SNORD14E       | -      |
| ENSG00000201512 | -0.440356 | -0.127832 | 0.725047 | 1 SNORA71C       | -      |
| ENSG00000214967 | -0.440356 | -0.127832 | 0.725047 | 1 NPIPA7         | -      |
| ENSG00000224080 | -0.440356 | -0.127832 | 0.725047 | 1 UBE2FP1        | K10687 |
| ENSG00000224195 | -0.440356 | -0.127832 | 0.725047 | 1 RP11-574K11.5  | -      |
| ENSG00000226580 | -0.440356 | -0.127832 | 0.725047 | 1 RPL39P40       | K02924 |
| ENSG00000230880 | -0.440356 | -0.127832 | 0.725047 | 1 RP11-417J8.3   | -      |
| ENSG00000235530 | -0.440356 | -0.127832 | 0.725047 | 1 AC087294.2     | -      |
| ENSG00000249855 | -0.440356 | -0.127832 | 0.725047 | 1 EEF1A1P19      | K03231 |
| ENSG00000254142 | -0.440356 | -0.127832 | 0.725047 | 1 RP11-53M11.3   | -      |
| ENSG00000255090 | -0.440356 | -0.127832 | 0.725047 | 1 RP11-820L6.1   | -      |
| ENSG00000257829 | -0.440356 | -0.127832 | 0.725047 | 1 RP11-845M18.6  | -      |
| ENSG00000272373 | -0.440356 | -0.127832 | 0.725047 | 1 ZNF33B         | -      |
| ENSG00000272902 | -0.440356 | -0.127832 | 0.725047 | 1 RP11-299H21.1  | -      |
| ENSG00000151239 | -0.231204 | 7.528924  | 0.725048 | 1 TWF1           | K08870 |
| ENSG00000023041 | -0.236045 | 5.480113  | 0.725061 | 1 ZDHHC6         | K18932 |

|                 |           |           |          |                 |        |
|-----------------|-----------|-----------|----------|-----------------|--------|
| ENSG00000141720 | -0.233194 | 6.03937   | 0.725144 | 1 PIP4K2B       | K00920 |
| ENSG00000127580 | 0.236221  | 4.621259  | 0.725216 | 1 WDR24         | -      |
| ENSG00000108604 | -0.233563 | 5.942253  | 0.725264 | 1 SMARCD2       | K11650 |
| ENSG00000180104 | 0.231182  | 7.202998  | 0.725293 | 1 EXOC3         | K06110 |
| ENSG00000162139 | 0.277235  | 2.754883  | 0.725376 | 1 NEU3          | K12357 |
| ENSG00000187534 | 0.277235  | 2.754883  | 0.725376 | 1 CTC-471F3.4   | -      |
| ENSG00000085365 | 0.234347  | 6.039661  | 0.725488 | 1 SCAMP1        | -      |
| ENSG00000109103 | 0.236659  | 4.985087  | 0.725718 | 1 UNC119        | -      |
| ENSG00000181744 | -0.2392   | 4.18704   | 0.725828 | 1 C3orf58       | -      |
| ENSG00000198720 | -0.233961 | 5.619412  | 0.725841 | 1 ANKRD13B      | -      |
| ENSG00000102181 | 0.272723  | 2.209285  | 0.725938 | 1 CD99L2        | K06520 |
| ENSG00000166197 | -0.229612 | 8.934189  | 0.725942 | 1 NOLC1         | -      |
| ENSG00000114738 | 0.232473  | 5.551089  | 0.725951 | 1 MAPKAPK3      | K04444 |
| ENSG00000108264 | -0.254857 | 3.332781  | 0.725968 | 1 TADA2A        | K11314 |
| ENSG00000087842 | -0.239943 | 4.836485  | 0.726367 | 1 PIR           | K06911 |
| ENSG00000160062 | 0.240274  | 3.404079  | 0.726374 | 1 ZBTB8A        | K10495 |
| ENSG00000145375 | -0.239695 | 4.053552  | 0.726389 | 1 SPATA5        | K14575 |
| ENSG00000170144 | -0.229373 | 8.337717  | 0.726504 | 1 HNRNPA3       | K12741 |
| ENSG00000266401 | 0.342221  | 1.283759  | 0.726541 | 1 RP11-874J12.4 | -      |
| ENSG00000272668 | 0.300604  | 1.304195  | 0.726541 | 1 RP11-190A12.8 | -      |
| ENSG00000166845 | -0.267438 | 2.990913  | 0.726567 | 1 C18orf54      | -      |
| ENSG00000182010 | -0.257182 | 2.985132  | 0.726567 | 1 RTKN2         | -      |
| ENSG00000115760 | 0.232347  | 6.364023  | 0.726597 | 1 BIRC6         | K10586 |
| ENSG00000101558 | 0.229638  | 7.654897  | 0.7266   | 1 VAPA          | K06096 |
| ENSG00000188070 | 0.236812  | 4.717835  | 0.726603 | 1 C11orf95      | -      |
| ENSG00000160563 | -0.241091 | 4.100302  | 0.726625 | 1 MED27         | K15170 |
| ENSG00000019991 | -1.472476 | -1.197592 | 0.726708 | 1 HGF           | K05460 |
| ENSG00000081923 | -1.472476 | -1.197592 | 0.726708 | 1 ATP8B1        | K01530 |
| ENSG00000120055 | -1.472476 | -1.197592 | 0.726708 | 1 C10orf95      | -      |
| ENSG00000135549 | -1.472476 | -1.197592 | 0.726708 | 1 PKIB          | -      |
| ENSG00000137507 | -1.472476 | -1.197592 | 0.726708 | 1 LRRC32        | -      |
| ENSG00000142449 | -1.472476 | -1.197592 | 0.726708 | 1 FBN3          | K06825 |
| ENSG00000151023 | -1.472476 | -1.197592 | 0.726708 | 1 ENKUR         | -      |
| ENSG00000154263 | -1.472476 | -1.197592 | 0.726708 | 1 ABCA10        | K05652 |
| ENSG00000172215 | -1.472476 | -1.197592 | 0.726708 | 1 CXCR6         | K04191 |
| ENSG00000172460 | -1.472476 | -1.197592 | 0.726708 | 1 PRSS30P       | K09626 |
| ENSG00000172508 | -1.472476 | -1.197592 | 0.726708 | 1 CARNS1        | K14755 |
| ENSG00000177640 | -1.472476 | -1.197592 | 0.726708 | 1 CASC2         | -      |
| ENSG00000183625 | -1.472476 | -1.197592 | 0.726708 | 1 CCR3          | K04178 |
| ENSG00000185105 | -1.472476 | -1.197592 | 0.726708 | 1 MYADML2       | -      |
| ENSG00000185862 | -1.472476 | -1.197592 | 0.726708 | 1 EVI2B         | K16854 |
| ENSG00000188383 | -1.472476 | -1.197592 | 0.726708 | 1 AC018892.9    | K00629 |
| ENSG00000188937 | -1.472476 | -1.197592 | 0.726708 | 1 NYX           | K08129 |
| ENSG00000197146 | -1.472476 | -1.197592 | 0.726708 | 1 AL133458.1    | K17985 |
| ENSG00000202379 | -1.472476 | -1.197592 | 0.726708 | 1 SNORA70       | -      |
| ENSG00000204982 | -1.472476 | -1.197592 | 0.726708 | 1 PRSS3P4       | K01312 |
| ENSG00000205791 | -1.472476 | -1.197592 | 0.726708 | 1 LOH12CR2      | K17985 |
| ENSG00000205898 | -1.472476 | -1.197592 | 0.726708 | 1 RP11-3B12.4   | -      |
| ENSG00000207561 | -1.472476 | -1.197592 | 0.726708 | 1 MIR635        | -      |
| ENSG00000208036 | -1.472476 | -1.197592 | 0.726708 | 1 MIR106B       | -      |
| ENSG00000209042 | -1.472476 | -1.197592 | 0.726708 | 1 SNORD12C      | -      |
| ENSG00000215146 | -1.472476 | -1.197592 | 0.726708 | 1 RP11-313J2.1  | K09228 |
| ENSG00000225075 | -1.472476 | -1.197592 | 0.726708 | 1 RP11-426L16.3 | -      |
| ENSG00000226887 | -1.472476 | -1.197592 | 0.726708 | 1 ERVMER34-1    | -      |
| ENSG00000228137 | -1.472476 | -1.197592 | 0.726708 | 1 AP001469.7    | -      |
| ENSG00000231826 | -1.472476 | -1.197592 | 0.726708 | 1 AC016735.2    | -      |
| ENSG00000232176 | -1.472476 | -1.197592 | 0.726708 | 1 RP11-146N23.1 | K02991 |
| ENSG00000236305 | -1.472476 | -1.197592 | 0.726708 | 1 RP11-126L15.4 | -      |



|                 |           |           |          |                  |        |
|-----------------|-----------|-----------|----------|------------------|--------|
| ENSG00000238099 | -1.472476 | -1.197592 | 0.726708 | 1 RP11-12A2.3    | -      |
| ENSG00000240048 | -1.472476 | -1.197592 | 0.726708 | 1 DDX50P2        | K13183 |
| ENSG00000243811 | -1.472476 | -1.197592 | 0.726708 | 1 APOBEC3D       | K18750 |
| ENSG00000247735 | -1.472476 | -1.197592 | 0.726708 | 1 CTD-2574D22.2  | -      |
| ENSG00000248235 | -1.472476 | -1.197592 | 0.726708 | 1 AC037459.4     | -      |
| ENSG00000249637 | -1.472476 | -1.197592 | 0.726708 | 1 CTC-329D1.2    | -      |
| ENSG00000254634 | -1.472476 | -1.197592 | 0.726708 | 1 RP11-231C14.3  | K08873 |
| ENSG00000254815 | -1.472476 | -1.197592 | 0.726708 | 1 RP11-496I9.1   | -      |
| ENSG00000258017 | -1.472476 | -1.197592 | 0.726708 | 1 RP11-386G11.10 | -      |
| ENSG00000258122 | -1.472476 | -1.197592 | 0.726708 | 1 RP11-61A14.1   | -      |
| ENSG00000260075 | -1.472476 | -1.197592 | 0.726708 | 1 NSFP1          | K06027 |
| ENSG00000260252 | -1.472476 | -1.197592 | 0.726708 | 1 RP11-384M15.3  | -      |
| ENSG00000261147 | -1.472476 | -1.197592 | 0.726708 | 1 RP11-697E2.6   | K16582 |
| ENSG00000262904 | -1.472476 | -1.197592 | 0.726708 | 1 RP11-144N1.1   | -      |
| ENSG00000265148 | -1.472476 | -1.197592 | 0.726708 | 1 BZRAP1-AS1     | -      |
| ENSG00000267049 | -1.472476 | -1.197592 | 0.726708 | 1 AC002398.13    | -      |
| ENSG00000267096 | -1.472476 | -1.197592 | 0.726708 | 1 CTD-2537I9.13  | -      |
| ENSG00000270742 | -1.472476 | -1.197592 | 0.726708 | 1 RP4-802A10.1   | -      |
| ENSG00000272764 | -1.472476 | -1.197592 | 0.726708 | 1 RP11-318E3.9   | -      |
| ENSG00000272777 | -1.472476 | -1.197592 | 0.726708 | 1 RP11-571L19.8  | -      |
| ENSG00000060558 | -1.217286 | -1.328937 | 0.726708 | 1 GNA15          | K04637 |
| ENSG00000107831 | -1.217286 | -1.328937 | 0.726708 | 1 FGF8           | K04358 |
| ENSG00000115008 | -1.217286 | -1.328937 | 0.726708 | 1 IL1A           | K04383 |
| ENSG00000125538 | -1.217286 | -1.328937 | 0.726708 | 1 IL1B           | K04519 |
| ENSG00000128340 | -1.217286 | -1.328937 | 0.726708 | 1 RAC2           | K07860 |
| ENSG00000131378 | -1.217286 | -1.328937 | 0.726708 | 1 RFTN1          | K07949 |
| ENSG00000137331 | -1.217286 | -1.328937 | 0.726708 | 1 IER3           | -      |
| ENSG00000138829 | -1.217286 | -1.328937 | 0.726708 | 1 FBN2           | K06825 |
| ENSG00000156689 | -1.217286 | -1.328937 | 0.726708 | 1 GLYATL2        | -      |
| ENSG00000161643 | -1.217286 | -1.328937 | 0.726708 | 1 SIGLEC16       | K06750 |
| ENSG00000161835 | -1.217286 | -1.328937 | 0.726708 | 1 GRASP          | -      |
| ENSG00000162843 | -1.217286 | -1.328937 | 0.726708 | 1 WDR64          | -      |
| ENSG00000163596 | -1.217286 | -1.328937 | 0.726708 | 1 ICA1L          | -      |
| ENSG00000164867 | -1.217286 | -1.328937 | 0.726708 | 1 NOS3           | K13242 |
| ENSG00000166257 | -1.217286 | -1.328937 | 0.726708 | 1 SCN3B          | K04847 |
| ENSG00000166763 | -1.217286 | -1.328937 | 0.726708 | 1 STRCP1         | -      |
| ENSG00000168939 | -1.217286 | -1.328937 | 0.726708 | 1 SPRY3          | K17384 |
| ENSG00000170122 | -1.217286 | -1.328937 | 0.726708 | 1 FOXD4          | K09397 |
| ENSG00000173261 | -1.217286 | -1.328937 | 0.726708 | 1 PLAC8L1        | -      |
| ENSG00000174527 | -1.217286 | -1.328937 | 0.726708 | 1 MYO1H          | K10356 |
| ENSG00000176410 | -1.217286 | -1.328937 | 0.726708 | 1 DNAJC30        | K19374 |
| ENSG00000177807 | -1.217286 | -1.328937 | 0.726708 | 1 KCNJ10         | K05003 |
| ENSG00000181104 | -1.217286 | -1.328937 | 0.726708 | 1 F2R            | K03914 |
| ENSG00000186105 | -1.217286 | -1.328937 | 0.726708 | 1 LRRC70         | -      |
| ENSG00000187140 | -1.217286 | -1.328937 | 0.726708 | 1 FOXD3          | K09397 |
| ENSG00000196866 | -1.217286 | -1.328937 | 0.726708 | 1 HIST1H2AD      | K11251 |
| ENSG00000198542 | -1.217286 | -1.328937 | 0.726708 | 1 ITGBL1         | -      |
| ENSG00000199024 | -1.217286 | -1.328937 | 0.726708 | 1 MIR103A2       | -      |
| ENSG00000204256 | -1.217286 | -1.328937 | 0.726708 | 1 BRD2           | K08871 |
| ENSG00000207770 | -1.217286 | -1.328937 | 0.726708 | 1 MIR568         | -      |
| ENSG00000213693 | -1.217286 | -1.328937 | 0.726708 | 1 SEC14L1P1      | -      |
| ENSG00000219992 | -1.217286 | -1.328937 | 0.726708 | 1 RP11-420L9.2   | K17986 |
| ENSG00000221406 | -1.217286 | -1.328937 | 0.726708 | 1 MIR320B2       | -      |
| ENSG00000224272 | -1.217286 | -1.328937 | 0.726708 | 1 AC114730.3     | -      |
| ENSG00000225541 | -1.217286 | -1.328937 | 0.726708 | 1 AC002480.5     | -      |
| ENSG00000225568 | -1.217286 | -1.328937 | 0.726708 | 1 RP11-384B12.3  | K10685 |
| ENSG00000228043 | -1.217286 | -1.328937 | 0.726708 | 1 AC097721.2     | -      |
| ENSG00000228906 | -1.217286 | -1.328937 | 0.726708 | 1 RP13-216E22.4  | -      |

|                  |           |           |          |                   |        |
|------------------|-----------|-----------|----------|-------------------|--------|
| ENSG00000229789  | -1.217286 | -1.328937 | 0.726708 | 1 RP11-391M20.1   | K13122 |
| ENSG00000230613  | -1.217286 | -1.328937 | 0.726708 | 1 HM13-AS1        | -      |
| ENSG00000231256  | -1.217286 | -1.328937 | 0.726708 | 1 C17orf105       | -      |
| ENSG00000231760  | -1.217286 | -1.328937 | 0.726708 | 1 RP11-350J20.5   | -      |
| ENSG00000232186  | -1.217286 | -1.328937 | 0.726708 | 1 RP11-311P8.2    | K11110 |
| ENSG00000232745  | -1.217286 | -1.328937 | 0.726708 | 1 ANKRD20A14P     | K17299 |
| ENSG00000233871  | -1.217286 | -1.328937 | 0.726708 | 1 DLG5-AS1        | -      |
| ENSG00000234937  | -1.217286 | -1.328937 | 0.726708 | 1 RP11-101O6.2    | K03038 |
| ENSG00000235677  | -1.217286 | -1.328937 | 0.726708 | 1 NPM1P26         | K11276 |
| ENSG00000235795  | -1.217286 | -1.328937 | 0.726708 | 1 RP11-421L21.2   | -      |
| ENSG00000236841  | -1.217286 | -1.328937 | 0.726708 | 1 AC007750.5      | -      |
| ENSG00000237037  | -1.217286 | -1.328937 | 0.726708 | 1 NDUFA6-AS1      | -      |
| ENSG00000237978  | -1.217286 | -1.328937 | 0.726708 | 1 RP11-385J1.2    | -      |
| ENSG00000238961  | -1.217286 | -1.328937 | 0.726708 | 1 SNORA47         | -      |
| ENSG00000239122  | -1.217286 | -1.328937 | 0.726708 | 1 RNU2-11P        | -      |
| ENSG00000242083  | -1.217286 | -1.328937 | 0.726708 | 1 RPL7AP31        | K02936 |
| ENSG00000244945  | -1.217286 | -1.328937 | 0.726708 | 1 RP11-1379J22.2  | -      |
| ENSG00000245017  | -1.217286 | -1.328937 | 0.726708 | 1 RP11-181C3.1    | K09228 |
| ENSG00000245293  | -1.217286 | -1.328937 | 0.726708 | 1 RP11-286E11.1   | -      |
| ENSG00000246982  | -1.217286 | -1.328937 | 0.726708 | 1 RP1-179N16.6    | -      |
| ENSG00000248664  | -1.217286 | -1.328937 | 0.726708 | 1 CTC-498J12.3    | -      |
| ENSG00000253704  | -1.217286 | -1.328937 | 0.726708 | 1 RP11-267M23.4   | -      |
| ENSG00000254409  | -1.217286 | -1.328937 | 0.726708 | 1 RP11-613D13.4   | -      |
| ENSG00000255443  | -1.217286 | -1.328937 | 0.726708 | 1 RP1-68D18.4     | -      |
| ENSG00000255521  | -1.217286 | -1.328937 | 0.726708 | 1 RP4-607I7.1     | -      |
| ENSG00000257137  | -1.217286 | -1.328937 | 0.726708 | 1 C12orf80        | -      |
| ENSG00000258065  | -1.217286 | -1.328937 | 0.726708 | 1 RP11-30H9.1     | -      |
| ENSG00000258940  | -1.217286 | -1.328937 | 0.726708 | 1 RP11-407N17.5   | -      |
| ENSG00000258944  | -1.217286 | -1.328937 | 0.726708 | 1 RP4-647C14.3    | -      |
| ENSG00000260625  | -1.217286 | -1.328937 | 0.726708 | 1 RP11-452L6.7    | -      |
| ENSG00000261268  | -1.217286 | -1.328937 | 0.726708 | 1 RP11-308D13.3   | -      |
| ENSG00000264043  | -1.217286 | -1.328937 | 0.726708 | 1 SNORA40         | -      |
| ENSG00000266473  | -1.217286 | -1.328937 | 0.726708 | 1 RP11-401F2.3    | -      |
| ENSG00000268891  | -1.217286 | -1.328937 | 0.726708 | 1 AC006014.1      | -      |
| ENSG00000271737  | -1.217286 | -1.328937 | 0.726708 | 1 CTB-113I20.2    | -      |
| ENSG00000271778  | -1.217286 | -1.328937 | 0.726708 | 1 RP11-379F4.8    | -      |
| ENSG00000271782  | -1.217286 | -1.328937 | 0.726708 | 1 RP5-850O15.4    | -      |
| ENSG00000271797  | -1.217286 | -1.328937 | 0.726708 | 1 CTC-428G20.6    | -      |
| ENSG00000272663  | -1.217286 | -1.328937 | 0.726708 | 1 RP11-191L17.1   | -      |
| ENSG00000272829  | -1.217286 | -1.328937 | 0.726708 | 1 XXbac-B135H6.18 | -      |
| ENSG00000272892  | -1.217286 | -1.328937 | 0.726708 | 1 RP11-57G10.8    | -      |
| ENSG00000272910  | -1.217286 | -1.328937 | 0.726708 | 1 RP11-15L13.4    | -      |
| ENSG00000273027  | -1.217286 | -1.328937 | 0.726708 | 1 LL21NC02-1C16.1 | -      |
| ENSG00000273350  | -1.217286 | -1.328937 | 0.726708 | 1 RP4-539M6.20    | -      |
| ENSG00000273483  | -1.217286 | -1.328937 | 0.726708 | 1 RP4-671G15.2    | -      |
| ENSG00000004776  | 0.999022  | -1.288103 | 0.726708 | 1 HSPB6           | K09545 |
| ENSG000000060140 | 0.999022  | -1.288103 | 0.726708 | 1 STYK1           | K17510 |
| ENSG00000100583  | 0.999022  | -1.288103 | 0.726708 | 1 SAMD15          | K09131 |
| ENSG00000124467  | 0.999022  | -1.288103 | 0.726708 | 1 PSG8            | K06500 |
| ENSG00000126467  | 0.999022  | -1.288103 | 0.726708 | 1 TSKS            | K16492 |
| ENSG00000127364  | 0.999022  | -1.288103 | 0.726708 | 1 TAS2R4          | K08474 |
| ENSG00000130307  | 0.999022  | -1.288103 | 0.726708 | 1 USHBP1          | K12581 |
| ENSG00000130377  | 0.999022  | -1.288103 | 0.726708 | 1 ACSBG2          | K15013 |
| ENSG00000131097  | 0.999022  | -1.288103 | 0.726708 | 1 HIGD1B          | -      |
| ENSG00000137077  | 0.999022  | -1.288103 | 0.726708 | 1 CCL21           | K16062 |
| ENSG00000139044  | 0.999022  | -1.288103 | 0.726708 | 1 B4GALNT3        | K09656 |
| ENSG00000140009  | 0.999022  | -1.288103 | 0.726708 | 1 ESR2            | K08551 |
| ENSG00000143786  | 0.999022  | -1.288103 | 0.726708 | 1 CNIH3           | K09512 |

|                 |          |           |          |                  |        |
|-----------------|----------|-----------|----------|------------------|--------|
| ENSG00000145975 | 0.999022 | -1.288103 | 0.726708 | 1 FAM217A        | -      |
| ENSG00000147382 | 0.999022 | -1.288103 | 0.726708 | 1 FAM58A         | -      |
| ENSG00000152253 | 0.999022 | -1.288103 | 0.726708 | 1 SPC25          | K11550 |
| ENSG00000154721 | 0.999022 | -1.288103 | 0.726708 | 1 JAM2           | K06735 |
| ENSG00000158516 | 0.999022 | -1.288103 | 0.726708 | 1 CPA2           | K01298 |
| ENSG00000161509 | 0.999022 | -1.288103 | 0.726708 | 1 GRIN2C         | K05211 |
| ENSG00000162398 | 0.999022 | -1.288103 | 0.726708 | 1 Clorf177       | -      |
| ENSG00000163803 | 0.999022 | -1.288103 | 0.726708 | 1 PLB1           | K14621 |
| ENSG00000164037 | 0.999022 | -1.288103 | 0.726708 | 1 SLC9B1         | -      |
| ENSG00000170689 | 0.999022 | -1.288103 | 0.726708 | 1 HOXB9          | K09294 |
| ENSG00000173801 | 0.999022 | -1.288103 | 0.726708 | 1 JUP            | K10056 |
| ENSG00000174807 | 0.999022 | -1.288103 | 0.726708 | 1 CD248          | K06706 |
| ENSG00000175414 | 0.999022 | -1.288103 | 0.726708 | 1 ARL10          | K07958 |
| ENSG00000179242 | 0.999022 | -1.288103 | 0.726708 | 1 CDH4           | K06797 |
| ENSG00000185532 | 0.999022 | -1.288103 | 0.726708 | 1 PRKG1          | K07376 |
| ENSG00000186940 | 0.999022 | -1.288103 | 0.726708 | 1 CHCHD2P9       | K00901 |
| ENSG00000196934 | 0.999022 | -1.288103 | 0.726708 | 1 RIMBP3B        | K04552 |
| ENSG00000212743 | 0.999022 | -1.288103 | 0.726708 | 1 DKFZP667F0711  | -      |
| ENSG00000213931 | 0.999022 | -1.288103 | 0.726708 | 1 HBE1           | K13825 |
| ENSG00000214796 | 0.999022 | -1.288103 | 0.726708 | 1 RP11-480I12.5  | K07374 |
| ENSG00000220937 | 0.999022 | -1.288103 | 0.726708 | 1 HNRNPA1P41     | K12741 |
| ENSG00000222301 | 0.999022 | -1.288103 | 0.726708 | 1 RNY5P8         | -      |
| ENSG00000225920 | 0.999022 | -1.288103 | 0.726708 | 1 RIMKLBP2       | K18310 |
| ENSG00000226167 | 0.999022 | -1.288103 | 0.726708 | 1 AP4B1-AS1      | -      |
| ENSG00000226179 | 0.999022 | -1.288103 | 0.726708 | 1 LINC00685      | -      |
| ENSG00000226453 | 0.999022 | -1.288103 | 0.726708 | 1 RP11-379B8.1   | -      |
| ENSG00000226784 | 0.999022 | -1.288103 | 0.726708 | 1 PGAM4          | K01834 |
| ENSG00000228217 | 0.999022 | -1.288103 | 0.726708 | 1 AL390877.1     | K18751 |
| ENSG00000229939 | 0.999022 | -1.288103 | 0.726708 | 1 RP11-111F16.2  | -      |
| ENSG00000230601 | 0.999022 | -1.288103 | 0.726708 | 1 RP11-402G3.3   | -      |
| ENSG00000230903 | 0.999022 | -1.288103 | 0.726708 | 1 RPL9P8         | K02940 |
| ENSG00000235351 | 0.999022 | -1.288103 | 0.726708 | 1 AC114730.11    | -      |
| ENSG00000237624 | 0.999022 | -1.288103 | 0.726708 | 1 OXCT2P1        | K01027 |
| ENSG00000237842 | 0.999022 | -1.288103 | 0.726708 | 1 RP11-110J1.2   | K13111 |
| ENSG00000243517 | 0.999022 | -1.288103 | 0.726708 | 1 RP11-627K11.1  | K02872 |
| ENSG00000244327 | 0.999022 | -1.288103 | 0.726708 | 1 RP11-383G6.3   | -      |
| ENSG00000244332 | 0.999022 | -1.288103 | 0.726708 | 1 RP11-119K6.6   | -      |
| ENSG00000245651 | 0.999022 | -1.288103 | 0.726708 | 1 RP11-620J15.2  | -      |
| ENSG00000245904 | 0.999022 | -1.288103 | 0.726708 | 1 RP11-796E2.4   | -      |
| ENSG00000247872 | 0.999022 | -1.288103 | 0.726708 | 1 SPCS2P3        | K12947 |
| ENSG00000248476 | 0.999022 | -1.288103 | 0.726708 | 1 BACH1-IT1      | -      |
| ENSG00000249264 | 0.999022 | -1.288103 | 0.726708 | 1 EEF1A1P9       | K03231 |
| ENSG00000249853 | 0.999022 | -1.288103 | 0.726708 | 1 HS3ST5         | -      |
| ENSG00000251023 | 0.999022 | -1.288103 | 0.726708 | 1 RP11-549J18.1  | -      |
| ENSG00000254838 | 0.999022 | -1.288103 | 0.726708 | 1 GVINP1         | K17985 |
| ENSG00000259910 | 0.999022 | -1.288103 | 0.726708 | 1 RP11-616M22.2  | -      |
| ENSG00000260046 | 0.999022 | -1.288103 | 0.726708 | 1 RP11-454K7.3   | -      |
| ENSG00000260891 | 0.999022 | -1.288103 | 0.726708 | 1 RP11-96D1.5    | -      |
| ENSG00000261187 | 0.999022 | -1.288103 | 0.726708 | 1 RP11-1007O24.2 | -      |
| ENSG00000262147 | 0.999022 | -1.288103 | 0.726708 | 1 RP13-638C3.3   | -      |
| ENSG00000262521 | 0.999022 | -1.288103 | 0.726708 | 1 AJ003147.8     | -      |
| ENSG00000263080 | 0.999022 | -1.288103 | 0.726708 | 1 RP11-485G7.5   | -      |
| ENSG00000264714 | 0.999022 | -1.288103 | 0.726708 | 1 RP11-21G15.1   | -      |
| ENSG00000267147 | 0.999022 | -1.288103 | 0.726708 | 1 CTC-548K16.1   | -      |
| ENSG00000267226 | 0.999022 | -1.288103 | 0.726708 | 1 RP11-126O1.5   | -      |
| ENSG00000267742 | 0.999022 | -1.288103 | 0.726708 | 1 FAM60CP        | -      |
| ENSG00000269191 | 0.999022 | -1.288103 | 0.726708 | 1 AC005387.2     | -      |
| ENSG00000269993 | 0.999022 | -1.288103 | 0.726708 | 1 AF003625.3     | -      |

|                 |           |           |          |                 |        |
|-----------------|-----------|-----------|----------|-----------------|--------|
| ENSG00000270110 | 0.999022  | -1.288103 | 0.726708 | 1 RP5-1139B12.4 | -      |
| ENSG00000270277 | 0.999022  | -1.288103 | 0.726708 | 1 RP11-65L3.2   | -      |
| ENSG00000271871 | 0.999022  | -1.288103 | 0.726708 | 1 AC005740.6    | -      |
| ENSG00000271966 | 0.999022  | -1.288103 | 0.726708 | 1 RP11-7F18.2   | -      |
| ENSG00000272070 | 0.999022  | -1.288103 | 0.726708 | 1 AC005618.6    | -      |
| ENSG00000272263 | 0.999022  | -1.288103 | 0.726708 | 1 RP11-767C1.2  | -      |
| ENSG00000272420 | 0.999022  | -1.288103 | 0.726708 | 1 RP4-740C4.7   | -      |
| ENSG00000272620 | 0.999022  | -1.288103 | 0.726708 | 1 AFAP1-AS1     | -      |
| ENSG00000128463 | -0.230516 | 6.79582   | 0.726821 | 1 EMC4          | -      |
| ENSG00000272452 | 0.282231  | 2.370064  | 0.726822 | 1 RP11-391M1.4  | -      |
| ENSG00000106004 | -0.258945 | 2.381698  | 0.726822 | 1 HOXA5         | K09305 |
| ENSG00000151552 | -0.246956 | 4.148098  | 0.726846 | 1 QDPR          | K00357 |
| ENSG00000186501 | 0.239431  | 4.141063  | 0.726846 | 1 TMMEM22       | -      |
| ENSG00000099977 | -0.230887 | 6.539779  | 0.726877 | 1 DDT           | K10028 |
| ENSG00000025800 | 0.230121  | 6.902632  | 0.726901 | 1 KPNA6         | K15042 |
| ENSG00000162433 | 0.230695  | 5.910584  | 0.726913 | 1 AK4           | K00939 |
| ENSG00000135249 | -0.233188 | 5.474212  | 0.726992 | 1 RINT1         | K07560 |
| ENSG00000142534 | 0.228384  | 10.07904  | 0.72702  | 1 RPS11         | K02949 |
| ENSG00000179943 | -0.239745 | 4.63258   | 0.727032 | 1 FIZ1          | -      |
| ENSG00000138617 | 0.243479  | 3.549774  | 0.72707  | 1 PARP16        | K00774 |
| ENSG00000152102 | 0.231486  | 6.228313  | 0.727366 | 1 FAM168B       | -      |
| ENSG00000127526 | 0.230248  | 5.846411  | 0.727368 | 1 SLC35E1       | K15283 |
| ENSG00000172366 | -0.230398 | 6.57237   | 0.727369 | 1 FAM195A       | -      |
| ENSG00000176393 | -0.229626 | 7.077212  | 0.7274   | 1 RNPEP         | K01260 |
| ENSG00000196821 | 0.228951  | 7.595979  | 0.727438 | 1 C6orf106      | -      |
| ENSG00000177370 | -0.234417 | 5.347592  | 0.727458 | 1 TIMM22        | K17790 |
| ENSG00000198355 | 0.229323  | 7.134025  | 0.727503 | 1 PIM3          | K08807 |
| ENSG00000231245 | -0.26131  | 2.525942  | 0.727525 | 1 C1DP1         | K12592 |
| ENSG00000147475 | -0.233025 | 5.248504  | 0.727593 | 1 ERLIN2        | -      |
| ENSG00000173692 | -0.229458 | 7.024684  | 0.727667 | 1 PSMD1         | K04157 |
| ENSG00000160789 | 0.227913  | 9.262304  | 0.727737 | 1 LMNA          | K12641 |
| ENSG00000127980 | -0.234048 | 4.605809  | 0.7278   | 1 PEX1          | K13338 |
| ENSG00000101974 | 0.229647  | 6.67194   | 0.727806 | 1 ATP11C        | K01530 |
| ENSG00000034152 | -0.230572 | 5.781112  | 0.727867 | 1 MAP2K3        | K04432 |
| ENSG00000100744 | -0.239087 | 4.110466  | 0.72792  | 1 GSKIP         | -      |
| ENSG00000094914 | -0.23028  | 6.089775  | 0.728017 | 1 AAAS          | K14320 |
| ENSG00000106608 | 0.229918  | 5.916409  | 0.72803  | 1 URGCP         | -      |
| ENSG00000138709 | -0.235668 | 4.874306  | 0.728041 | 1 LARP1B        | K18757 |
| ENSG00000166398 | 0.243394  | 4.14847   | 0.7281   | 1 KIAA0355      | -      |
| ENSG00000175305 | 0.238045  | 4.150993  | 0.7281   | 1 CCNE2         | K06626 |
| ENSG00000128524 | 0.230808  | 6.123904  | 0.728152 | 1 ATP6V1F       | K02151 |
| ENSG00000196597 | 0.311951  | 1.591049  | 0.728199 | 1 ZNF782        | K09228 |
| ENSG00000108187 | -0.295689 | 1.624493  | 0.728199 | 1 PBLD          | K15601 |
| ENSG00000133997 | -0.23473  | 4.925661  | 0.728247 | 1 MED6          | K15128 |
| ENSG00000066855 | -0.22899  | 6.979229  | 0.728269 | 1 MTFR1         | -      |
| ENSG00000198901 | 0.227864  | 7.976176  | 0.728382 | 1 PRC1          | K16732 |
| ENSG00000116678 | -0.245344 | 3.421202  | 0.728444 | 1 LEPR          | K05062 |
| ENSG00000138095 | -0.227435 | 8.893788  | 0.728454 | 1 LRPPRC        | K17964 |
| ENSG00000136021 | -0.229249 | 6.046024  | 0.728506 | 1 SCYL2         | K17541 |
| ENSG00000127337 | -0.230687 | 5.617631  | 0.728515 | 1 YEATS4        | K11341 |
| ENSG00000205133 | -0.243362 | 3.921009  | 0.72854  | 1 TRIQK         | -      |
| ENSG00000128626 | -0.229363 | 6.577887  | 0.728541 | 1 MRPS12        | K02950 |
| ENSG00000182004 | -0.230385 | 5.7562    | 0.728579 | 1 SNRPE         | K11097 |
| ENSG00000086712 | -0.229102 | 6.697948  | 0.72861  | 1 TXLNG         | -      |
| ENSG00000116852 | -0.254395 | 3.49708   | 0.728707 | 1 KIF21B        | K10395 |
| ENSG00000169612 | -0.254395 | 3.49708   | 0.728707 | 1 FAM103A1      | K18708 |
| ENSG00000116205 | -0.247205 | 3.493071  | 0.728707 | 1 TCEANC2       | -      |
| ENSG00000215305 | -0.237561 | 4.848692  | 0.728708 | 1 VPS16         | -      |

|                 |           |          |          |                 |        |
|-----------------|-----------|----------|----------|-----------------|--------|
| ENSG00000121067 | -0.234259 | 5.254256 | 0.728769 | 1 SPOP          | K10523 |
| ENSG00000084234 | 0.227006  | 8.998344 | 0.728861 | 1 APLP2         | K08117 |
| ENSG00000108010 | -0.228094 | 7.27517  | 0.728892 | 1 GLRX3         | K18047 |
| ENSG00000170089 | -0.241083 | 4.018845 | 0.728894 | 1 RP11-423H2.1  | K12880 |
| ENSG00000087095 | 0.239866  | 4.064426 | 0.729053 | 1 NLK           | K04468 |
| ENSG00000005238 | 0.232765  | 5.167168 | 0.729086 | 1 FAM214B       | -      |
| ENSG00000149932 | -0.231064 | 5.536891 | 0.72917  | 1 TMEM219       | -      |
| ENSG00000065000 | 0.227599  | 7.398837 | 0.729176 | 1 AP3D1         | K12396 |
| ENSG00000177427 | 0.238218  | 4.113446 | 0.729203 | 1 MIEF2         | K10087 |
| ENSG00000131507 | -0.228354 | 6.840857 | 0.729216 | 1 NDFIP1        | -      |
| ENSG00000127947 | -0.228741 | 6.561285 | 0.729284 | 1 PTPN12        | K18024 |
| ENSG00000127527 | 0.233335  | 5.234015 | 0.729289 | 1 EPS15L1       | K12472 |
| ENSG00000075292 | -0.227694 | 7.310652 | 0.729307 | 1 ZNF638        | -      |
| ENSG00000136261 | 0.227169  | 7.796882 | 0.729311 | 1 BZW2          | -      |
| ENSG00000142945 | 0.226855  | 8.145113 | 0.729429 | 1 KIF2C         | K10393 |
| ENSG00000054277 | -0.237202 | 4.550808 | 0.729429 | 1 OPN3          | K04256 |
| ENSG00000158711 | -0.232748 | 5.486967 | 0.7295   | 1 ELK4          | K04376 |
| ENSG00000149761 | -0.234889 | 4.582229 | 0.729528 | 1 NUDT22        | -      |
| ENSG00000205339 | 0.226317  | 9.265721 | 0.729568 | 1 IPO7          | -      |
| ENSG00000242299 | 0.228249  | 6.560067 | 0.729603 | 1 RP11-234A1.1  | K02964 |
| ENSG00000163634 | -0.22855  | 6.511254 | 0.729605 | 1 THOC7         | K13176 |
| ENSG00000122026 | -0.230364 | 5.174003 | 0.729704 | 1 RPL21         | K02889 |
| ENSG00000105011 | 0.228426  | 6.401366 | 0.729709 | 1 ASF1B         | K10753 |
| ENSG00000112245 | 0.226017  | 10.07402 | 0.729737 | 1 PTP4A1        | -      |
| ENSG00000143093 | -0.231741 | 4.986344 | 0.729848 | 1 STRIP1        | -      |
| ENSG00000242372 | -0.226988 | 7.502371 | 0.729901 | 1 EIF6          | K03264 |
| ENSG00000189410 | -0.292225 | 2.063695 | 0.729993 | 1 SH2D5         | -      |
| ENSG00000083097 | 0.277365  | 2.059588 | 0.729993 | 1 DOPEY1        | -      |
| ENSG00000181856 | 0.277365  | 2.059588 | 0.729993 | 1 SLC2A4        | K07191 |
| ENSG00000089280 | -0.226222 | 8.418956 | 0.73007  | 1 FUS           | K13098 |
| ENSG00000077235 | 0.22875   | 6.274974 | 0.730117 | 1 GTF3C1        | K15199 |
| ENSG00000147679 | -0.232522 | 5.109479 | 0.730157 | 1 UTP23         | K14773 |
| ENSG00000167258 | -0.228967 | 5.904727 | 0.730176 | 1 CDK12         | K06115 |
| ENSG00000109787 | -0.23087  | 5.577826 | 0.73021  | 1 KLF3          | K15605 |
| ENSG00000173566 | -0.291119 | 2.241422 | 0.730525 | 1 NUDT18        | K17817 |
| ENSG00000230124 | -0.291119 | 2.241422 | 0.730525 | 1 RP5-1180C10.2 | -      |
| ENSG00000090006 | -0.227274 | 6.358928 | 0.730582 | 1 LTBP4         | K08023 |
| ENSG00000175193 | -0.23116  | 5.364704 | 0.730728 | 1 PARL          | K09650 |
| ENSG00000180626 | 0.233319  | 3.568553 | 0.730793 | 1 ZNF594        | K09228 |
| ENSG00000144713 | 0.225173  | 9.350541 | 0.730858 | 1 RPL32         | K02912 |
| ENSG00000177565 | -0.226698 | 6.902584 | 0.73101  | 1 TBL1XR1       | K04508 |
| ENSG00000198018 | 0.236813  | 3.699247 | 0.731047 | 1 ENTPD7        | K14643 |
| ENSG00000116747 | -0.230905 | 5.247348 | 0.731053 | 1 TROVE2        | K11089 |
| ENSG00000164924 | -0.22473  | 10.51781 | 0.731169 | 1 YWHAZ         | K16197 |
| ENSG00000178038 | -0.23344  | 4.489689 | 0.731195 | 1 ALS2CL        | -      |
| ENSG00000115963 | -0.228532 | 6.119699 | 0.731293 | 1 RND3          | K07859 |
| ENSG00000114354 | 0.225156  | 8.136549 | 0.731384 | 1 TFG           | K09292 |
| ENSG00000204103 | -0.241073 | 3.932509 | 0.731442 | 1 MAFB          | K09036 |
| ENSG00000034693 | 0.234176  | 4.687504 | 0.731519 | 1 PEX3          | K13336 |
| ENSG00000077721 | -0.22619  | 6.88119  | 0.731626 | 1 UBE2A         | K10573 |
| ENSG00000123600 | -0.238373 | 4.087444 | 0.731667 | 1 METTL8        | K09548 |
| ENSG00000176386 | 0.231382  | 4.126135 | 0.731733 | 1 CDC26         | K03359 |
| ENSG00000141568 | 0.225604  | 7.084406 | 0.731823 | 1 FOXK2         | K09404 |
| ENSG00000087008 | 0.253536  | 2.90356  | 0.731872 | 1 ACOX3         | K00232 |
| ENSG00000114126 | -0.22752  | 5.831223 | 0.731927 | 1 TFDP2         | K09392 |
| ENSG00000138286 | -0.236016 | 4.346286 | 0.732005 | 1 FAM149B1      | -      |
| ENSG00000130559 | 0.229411  | 5.117456 | 0.732075 | 1 CAMSAP1       | K17493 |
| ENSG00000247516 | -0.238434 | 4.421839 | 0.732094 | 1 MIR4458HG     | -      |

|                 |           |          |          |              |        |
|-----------------|-----------|----------|----------|--------------|--------|
| ENSG00000213064 | -0.228431 | 5.991982 | 0.73211  | 1 SFT2D2     | -      |
| ENSG00000237753 | -0.373178 | 0.553458 | 0.732196 | 1 AC079922.3 | -      |
| ENSG00000158458 | 0.373001  | 0.524082 | 0.732196 | 1 NRG2       | K05456 |
| ENSG00000186301 | 0.373001  | 0.524082 | 0.732196 | 1 MST1P2     | -      |
| ENSG00000152684 | -0.226445 | 6.386423 | 0.732221 | 1 PELO       | K06965 |
| ENSG00000082898 | -0.224197 | 8.636581 | 0.732283 | 1 XPO1       | K14290 |
| ENSG00000171792 | -0.226591 | 6.170463 | 0.732292 | 1 RHNO1      | -      |
| ENSG00000215492 | -0.228125 | 6.18197  | 0.732303 | 1 HNRNPA1P7  | K12741 |
| ENSG00000141959 | 0.224722  | 7.575619 | 0.732304 | 1 PFKL       | K00850 |
| ENSG00000091436 | 0.225989  | 6.489502 | 0.73232  | 1 MLTK       | K04424 |
| ENSG00000129472 | -0.254055 | 3.293063 | 0.73234  | 1 RAB2B      | K07878 |
| ENSG00000103528 | -0.245748 | 3.288419 | 0.73234  | 1 SYT17      | -      |
| ENSG00000124942 | 0.223982  | 8.852563 | 0.732384 | 1 AHNAK      | -      |
| ENSG00000218510 | -0.255615 | 3.371431 | 0.732422 | 1 LINC00339  | -      |
| ENSG00000122687 | -0.225593 | 6.044041 | 0.732499 | 1 FTSJ2      | K02427 |
| ENSG00000147124 | 0.241747  | 3.507986 | 0.732559 | 1 ZNF41      | K09228 |
| ENSG00000104825 | -0.232077 | 4.92421  | 0.732565 | 1 NFKBIB     | K02581 |
| ENSG00000068028 | 0.22923   | 4.998902 | 0.732624 | 1 RASSF1     | K09850 |
| ENSG00000141480 | 0.230047  | 5.073804 | 0.732676 | 1 ARRB2      | K04439 |
| ENSG00000188372 | -0.229172 | 5.256544 | 0.732794 | 1 ZP3        | K11447 |
| ENSG00000109390 | -0.227854 | 5.275896 | 0.732807 | 1 NDUFC1     | K03967 |
| ENSG00000084623 | -0.223805 | 8.329328 | 0.732895 | 1 EIF3I      | K03246 |
| ENSG00000183155 | -0.240355 | 3.9943   | 0.732901 | 1 RABIF      | K10653 |
| ENSG00000100300 | -0.224151 | 7.754875 | 0.732912 | 1 TSPO       | K05770 |
| ENSG00000115844 | -0.241786 | 4.042979 | 0.732929 | 1 DLX2       | K18488 |
| ENSG00000134802 | -0.223568 | 8.770723 | 0.732944 | 1 SLC43A3    | K08230 |
| ENSG00000143222 | -0.225935 | 5.735797 | 0.733045 | 1 UFC1       | K12165 |
| ENSG00000104812 | 0.224877  | 6.784524 | 0.733081 | 1 GYS1       | K00693 |
| ENSG00000090975 | 0.229143  | 4.385437 | 0.7331   | 1 PITPNM2    | -      |
| ENSG00000162377 | -0.232846 | 4.791287 | 0.733247 | 1 COA7       | K18180 |
| ENSG00000182504 | -0.232846 | 4.791287 | 0.733247 | 1 CEP97      | K16717 |
| ENSG00000128829 | -0.226103 | 6.353584 | 0.733264 | 1 EIF2AK4    | K16196 |
| ENSG00000145912 | -0.224514 | 7.029408 | 0.733321 | 1 NHP2       | K11129 |
| ENSG00000149100 | -0.223316 | 8.506986 | 0.733359 | 1 EIF3M      | K15030 |
| ENSG00000163866 | -0.225904 | 5.491843 | 0.733416 | 1 SMIM12     | -      |
| ENSG00000162063 | 0.227862  | 5.706291 | 0.733453 | 1 CCNF       | K10289 |
| ENSG00000172037 | 0.22671   | 5.765594 | 0.733462 | 1 LAMB2      | K06243 |
| ENSG00000018408 | 0.226814  | 6.035636 | 0.733499 | 1 WWTR1      | K16820 |
| ENSG00000115091 | -0.223499 | 7.942523 | 0.733507 | 1 ACTR3      | K18584 |
| ENSG00000214517 | 0.224485  | 6.209434 | 0.733519 | 1 PPME1      | K13617 |
| ENSG00000143748 | 0.224533  | 6.664583 | 0.733671 | 1 NVL        | K14571 |
| ENSG00000166681 | -0.223641 | 7.567118 | 0.733673 | 1 NGFRAP1    | K12465 |
| ENSG00000180304 | 0.224345  | 6.718938 | 0.733796 | 1 OAZ2       | K16613 |
| ENSG00000149792 | -0.22495  | 5.869948 | 0.733853 | 1 MRPL49     | K17430 |
| ENSG00000181852 | -0.226744 | 5.422029 | 0.733916 | 1 RNF41      | K11981 |
| ENSG00000139668 | 0.232335  | 4.701077 | 0.734059 | 1 WDFY2      | -      |
| ENSG00000142623 | 0.369419  | 0.985107 | 0.734082 | 1 PADI1      | K01481 |
| ENSG00000089094 | -0.346214 | 1.013145 | 0.734082 | 1 KDM2B      | K10276 |
| ENSG00000236200 | -0.346214 | 1.013145 | 0.734082 | 1 KDM4A-AS1  | -      |
| ENSG00000244122 | -0.346214 | 1.013145 | 0.734082 | 1 UGT1A7     | K00699 |
| ENSG00000169375 | 0.224855  | 6.287382 | 0.734091 | 1 SIN3A      | K11644 |
| ENSG00000157326 | -0.231586 | 4.275614 | 0.734176 | 1 DHRS4      | K11147 |
| ENSG00000178988 | 0.224179  | 5.938043 | 0.734204 | 1 MRFAP1L1   | -      |
| ENSG00000184517 | 0.23801   | 3.831502 | 0.734322 | 1 ZFP1       | K09228 |
| ENSG00000215440 | 0.231352  | 3.834667 | 0.734322 | 1 NPEPL1     | K09611 |
| ENSG00000108592 | -0.223454 | 7.124473 | 0.734404 | 1 FTSJ3      | K14857 |
| ENSG00000174748 | 0.22203   | 9.338027 | 0.734475 | 1 RPL15      | K02877 |
| ENSG00000186017 | -0.246298 | 3.457585 | 0.734475 | 1 ZNF566     | K09228 |

|                 |           |          |          |                 |        |
|-----------------|-----------|----------|----------|-----------------|--------|
| ENSG00000113312 | -0.225882 | 6.005689 | 0.734523 | 1 TTC1          | -      |
| ENSG00000184281 | -0.225478 | 5.13338  | 0.734592 | 1 TSSC4         | -      |
| ENSG00000155287 | 0.230765  | 5.107301 | 0.734606 | 1 SLC25A28      | K15113 |
| ENSG00000163702 | 0.22713   | 5.035507 | 0.734652 | 1 IL17RC        | K05166 |
| ENSG00000175287 | -0.258066 | 3.034159 | 0.734662 | 1 PHYHD1        | K00477 |
| ENSG00000134490 | -0.256234 | 2.934376 | 0.734708 | 1 TMEM241       | -      |
| ENSG00000237298 | -0.331671 | 1.360622 | 0.734719 | 1 TTN-AS1       | -      |
| ENSG00000258738 | -0.331671 | 1.360622 | 0.734719 | 1 RP11-73E17.2  | -      |
| ENSG00000156050 | 0.327013  | 1.354589 | 0.734719 | 1 FAM161B       | K19348 |
| ENSG00000187792 | 0.327013  | 1.354589 | 0.734719 | 1 ZNF70         | K08878 |
| ENSG00000267957 | 0.327013  | 1.354589 | 0.734719 | 1 RP11-178G16.4 | -      |
| ENSG00000115419 | -0.223821 | 6.661213 | 0.73472  | 1 GLS           | K01425 |
| ENSG00000144909 | -0.232534 | 4.937141 | 0.734722 | 1 OSBPL11       | -      |
| ENSG00000131061 | 0.25499   | 2.812823 | 0.734757 | 1 ZNF341        | K06115 |
| ENSG00000110400 | 0.260847  | 2.688934 | 0.734808 | 1 PVRL1         | -      |
| ENSG00000136986 | 0.22331   | 6.808999 | 0.734839 | 1 DERL1         | K11519 |
| ENSG00000269990 | 0.251425  | 2.561392 | 0.734862 | 1 CTD-3074O7.12 | -      |
| ENSG00000188321 | -0.282503 | 2.432204 | 0.734915 | 1 ZNF559        | K09228 |
| ENSG00000189350 | 0.258151  | 2.412708 | 0.734915 | 1 FAM179A       | K12581 |
| ENSG00000221983 | 0.221654  | 9.282004 | 0.734923 | 1 UBA52         | K02927 |
| ENSG00000138041 | -0.223529 | 6.718915 | 0.73495  | 1 SMEK2         | K17491 |
| ENSG00000132749 | -0.282438 | 2.277776 | 0.734964 | 1 MTL5          | -      |
| ENSG00000120899 | 0.266557  | 2.246923 | 0.734964 | 1 PTK2B         | K05871 |
| ENSG00000118420 | -0.263035 | 2.093658 | 0.735    | 1 UBE3D         | -      |
| ENSG00000110074 | -0.228921 | 5.330269 | 0.735024 | 1 FOXRED1       | K18166 |
| ENSG00000164091 | -0.225357 | 5.702532 | 0.735143 | 1 WDR82         | K14962 |
| ENSG00000141504 | -0.229231 | 5.113275 | 0.735238 | 1 SAT2          | K00657 |
| ENSG00000125945 | 0.231392  | 4.235033 | 0.735343 | 1 ZNF436        | K09228 |
| ENSG00000107954 | 0.225843  | 5.390822 | 0.735492 | 1 NEURL1        | K01931 |
| ENSG00000175906 | -0.224614 | 6.049345 | 0.735497 | 1 ARL4D         | K07945 |
| ENSG00000110660 | -0.226307 | 5.688157 | 0.735583 | 1 SLC35F2       | K15287 |
| ENSG00000197956 | 0.221044  | 9.265475 | 0.73563  | 1 S100A6        | -      |
| ENSG00000157823 | 0.239013  | 3.952656 | 0.735682 | 1 AP3S2         | K12399 |
| ENSG00000157379 | 0.234531  | 3.900762 | 0.735752 | 1 DHRS1         | K11163 |
| ENSG00000131626 | 0.22433   | 5.808522 | 0.735822 | 1 PPFIA1        | -      |
| ENSG00000168300 | -0.225931 | 5.470263 | 0.735894 | 1 PCMTD1        | -      |
| ENSG00000140153 | 0.238227  | 3.784501 | 0.735909 | 1 WDR20         | -      |
| ENSG00000163738 | -0.236894 | 3.797144 | 0.735909 | 1 MTHFD2L       | K13403 |
| ENSG00000181789 | 0.221151  | 8.160507 | 0.735971 | 1 COPG1         | K17267 |
| ENSG00000103066 | 0.229962  | 4.993398 | 0.736056 | 1 PLA2G15       | K06129 |
| ENSG00000172932 | 0.229289  | 4.47698  | 0.736076 | 1 ANKRD13D      | -      |
| ENSG00000165288 | -0.227757 | 4.947103 | 0.736141 | 1 BRWD3         | K11798 |
| ENSG00000091490 | -0.223439 | 5.577828 | 0.736196 | 1 SEL1L3        | -      |
| ENSG00000128581 | -0.228639 | 4.407391 | 0.736199 | 1 RABL5         | K07935 |
| ENSG00000180667 | 0.222112  | 6.818361 | 0.7362   | 1 YOD1          | K13719 |
| ENSG00000125746 | 0.221787  | 7.057945 | 0.736237 | 1 EML2          | K18595 |
| ENSG00000125885 | -0.22639  | 4.808564 | 0.736383 | 1 MCM8          | K10737 |
| ENSG00000170365 | 0.248564  | 3.460823 | 0.736428 | 1 SMAD1         | K04676 |
| ENSG00000139722 | 0.223514  | 5.3761   | 0.736566 | 1 VPS37B        | K12185 |
| ENSG00000178719 | 0.231389  | 4.199639 | 0.736569 | 1 GRINA         | K06890 |
| ENSG00000125779 | -0.227069 | 5.025869 | 0.736684 | 1 PANK2         | K09680 |
| ENSG00000115275 | -0.221927 | 6.768387 | 0.736701 | 1 MOGS          | K01228 |
| ENSG00000088970 | 0.225657  | 4.619529 | 0.736744 | 1 PLK1S1        | -      |
| ENSG00000197860 | 0.225657  | 4.619529 | 0.736744 | 1 SGTB          | K16365 |
| ENSG00000168288 | -0.221831 | 6.799791 | 0.736758 | 1 MMADHC        | -      |
| ENSG00000253352 | 0.221259  | 7.082768 | 0.736812 | 1 TUG1          | -      |
| ENSG00000136026 | -0.22044  | 8.201089 | 0.736843 | 1 CKAP4         | K13999 |
| ENSG00000107614 | -0.24843  | 3.228928 | 0.736872 | 1 TRDMT1        | K15336 |

|                 |           |          |          |             |        |
|-----------------|-----------|----------|----------|-------------|--------|
| ENSG00000117411 | -0.222441 | 6.251487 | 0.736994 | 1 B4GALT2   | K07967 |
| ENSG00000130707 | 0.219665  | 10.24598 | 0.737018 | 1 ASS1      | K01940 |
| ENSG00000115425 | -0.24624  | 3.142146 | 0.737053 | 1 PECR      | K07753 |
| ENSG00000095380 | -0.221273 | 7.009839 | 0.737068 | 1 NANS      | K05304 |
| ENSG00000117614 | 0.22487   | 5.741998 | 0.737156 | 1 SYF2      | K12868 |
| ENSG00000143801 | -0.22792  | 5.078686 | 0.737229 | 1 PSEN2     | K04522 |
| ENSG00000113597 | -0.22553  | 5.077383 | 0.737229 | 1 TRAPPC13  | -      |
| ENSG00000145592 | 0.219399  | 10.86181 | 0.737253 | 1 RPL37     | K02922 |
| ENSG00000168803 | -0.231103 | 4.371872 | 0.737309 | 1 ADAL      | K09228 |
| ENSG00000136144 | -0.228972 | 4.724892 | 0.737373 | 1 RCBTB1    | K11494 |
| ENSG00000136603 | -0.222378 | 6.199974 | 0.737417 | 1 SKIL      | -      |
| ENSG00000151876 | 0.228975  | 4.287692 | 0.737511 | 1 FBXO4     | K10291 |
| ENSG00000066044 | -0.221085 | 6.855336 | 0.737521 | 1 ELAVL1    | K13088 |
| ENSG00000181754 | 0.238459  | 3.735917 | 0.737607 | 1 AMIGO1    | -      |
| ENSG00000162910 | -0.224498 | 5.365763 | 0.737661 | 1 MRPL55    | K17436 |
| ENSG00000198843 | -0.2226   | 5.985784 | 0.737666 | 1 SELT      | -      |
| ENSG00000185798 | 0.229459  | 4.590651 | 0.737709 | 1 WDR53     | K10319 |
| ENSG00000167693 | 0.22131   | 6.297454 | 0.737731 | 1 NXN       | K17609 |
| ENSG00000103148 | -0.2222   | 6.06252  | 0.737791 | 1 NPRL3     | -      |
| ENSG00000145390 | -0.232453 | 4.117993 | 0.737991 | 1 USP53     | -      |
| ENSG00000115762 | 0.220477  | 6.849524 | 0.73803  | 1 PLEKHB2   | K17985 |
| ENSG00000170004 | 0.219504  | 7.901347 | 0.738037 | 1 CHD3      | K11642 |
| ENSG00000140025 | -0.2641   | 2.718333 | 0.738042 | 1 EFCAB11   | -      |
| ENSG00000184058 | -0.235607 | 4.07447  | 0.73813  | 1 TBX1      | K10175 |
| ENSG00000090924 | 0.234201  | 4.067105 | 0.73813  | 1 PLEKHG2   | -      |
| ENSG00000182809 | 0.237443  | 3.538589 | 0.73814  | 1 CRIP2     | -      |
| ENSG00000170502 | -0.22409  | 4.982171 | 0.738162 | 1 NUDT9     | K13988 |
| ENSG00000173230 | 0.220008  | 7.056289 | 0.738283 | 1 GOLGB1    | -      |
| ENSG00000120910 | -0.22712  | 3.974776 | 0.738437 | 1 PPP3CC    | K04348 |
| ENSG00000007923 | -0.222259 | 5.446347 | 0.738452 | 1 DNAJC11   | K09531 |
| ENSG00000008735 | -0.248687 | 3.4048   | 0.738584 | 1 MAPK8IP2  | K04435 |
| ENSG00000179046 | -0.226513 | 4.302471 | 0.738605 | 1 TRIML2    | K12039 |
| ENSG00000109685 | 0.22021   | 6.615267 | 0.738716 | 1 WHSC1     | K11424 |
| ENSG00000213442 | 0.219213  | 7.460167 | 0.738743 | 1 RPL18AP3  | K02882 |
| ENSG00000087076 | 0.271014  | 2.43672  | 0.738787 | 1 HSD17B14  | K00826 |
| ENSG00000167604 | -0.260188 | 2.45563  | 0.738787 | 1 NFKBID    | K14214 |
| ENSG00000123810 | 0.253129  | 2.445433 | 0.738787 | 1 B9D2      | K16745 |
| ENSG00000163710 | -0.222912 | 4.79283  | 0.738788 | 1 PCOLCE2   | -      |
| ENSG00000182552 | -0.223194 | 5.159354 | 0.738886 | 1 RWDD4     | -      |
| ENSG00000159200 | 0.227215  | 4.492677 | 0.738958 | 1 RCAN1     | K17901 |
| ENSG00000137449 | -0.234457 | 3.809668 | 0.738986 | 1 CPEB2     | K02602 |
| ENSG00000168275 | -0.224488 | 5.411773 | 0.739084 | 1 COA6      | K18179 |
| ENSG00000188130 | -0.224488 | 5.411773 | 0.739084 | 1 MAPK12    | K04441 |
| ENSG00000138030 | 0.246409  | 3.237182 | 0.739126 | 1 KHK       | K00846 |
| ENSG00000197894 | -0.219243 | 7.205386 | 0.739135 | 1 ADH5      | K00121 |
| ENSG00000141141 | -0.220716 | 5.941563 | 0.739224 | 1 DDX52     | K14779 |
| ENSG00000268942 | 0.260708  | 2.283598 | 0.73926  | 1 CKS1B     | K02219 |
| ENSG00000102125 | -0.257558 | 2.303753 | 0.73926  | 1 TAZ       | K13511 |
| ENSG00000156869 | -0.257558 | 2.303753 | 0.73926  | 1 FRRS1     | -      |
| ENSG00000160949 | -0.220624 | 6.10706  | 0.739267 | 1 TONSL     | K09257 |
| ENSG00000138160 | -0.219461 | 6.909919 | 0.739301 | 1 KIF11     | K10398 |
| ENSG00000198618 | 0.217597  | 10.1402  | 0.739417 | 1 PPIAP2    | K03767 |
| ENSG00000073605 | 0.239293  | 3.151072 | 0.739444 | 1 GSDMB     | -      |
| ENSG00000240990 | -0.23311  | 3.156682 | 0.739444 | 1 HOXA11-AS | -      |
| ENSG00000241468 | -0.219033 | 7.145377 | 0.739454 | 1 ATP5J2    | K02130 |
| ENSG00000101182 | -0.218276 | 7.844171 | 0.739593 | 1 PSMA7     | K02731 |
| ENSG00000119640 | 0.233251  | 3.622993 | 0.739678 | 1 ACYP1     | K01512 |
| ENSG00000144233 | 0.220342  | 5.725494 | 0.739691 | 1 AMMECR1L  | -      |



|                 |           |          |          |                |        |
|-----------------|-----------|----------|----------|----------------|--------|
| ENSG00000135686 | 0.227881  | 4.73446  | 0.739806 | 1 KLHL36       | K13958 |
| ENSG00000196296 | 0.270388  | 2.101294 | 0.739827 | 1 ATP2A1       | K05853 |
| ENSG00000171853 | -0.229111 | 4.264237 | 0.739861 | 1 TRAPPC12     | -      |
| ENSG00000135469 | 0.228707  | 4.70278  | 0.739936 | 1 COQ10A       | K18588 |
| ENSG00000134375 | -0.218407 | 7.318951 | 0.739958 | 1 TIMM17A      | K17795 |
| ENSG00000078061 | 0.221034  | 5.759118 | 0.739965 | 1 ARAF         | K08845 |
| ENSG00000169683 | -0.225429 | 5.187283 | 0.73999  | 1 LRRC45       | -      |
| ENSG00000198546 | -0.223212 | 5.186077 | 0.73999  | 1 ZNF511       | -      |
| ENSG00000106948 | 0.231362  | 3.924117 | 0.740011 | 1 AKNA         | K15696 |
| ENSG00000112658 | -0.220097 | 5.99955  | 0.740043 | 1 SRF          | K04378 |
| ENSG00000163939 | -0.225523 | 4.468024 | 0.74006  | 1 PBRM1        | K11757 |
| ENSG00000115808 | -0.224548 | 5.165473 | 0.740088 | 1 STRN         | K17608 |
| ENSG00000179041 | -0.218847 | 6.192814 | 0.74015  | 1 RRS1         | K14852 |
| ENSG00000113300 | -0.221815 | 5.616743 | 0.740169 | 1 CNOT6        | K12603 |
| ENSG00000106392 | -0.221353 | 5.142084 | 0.740188 | 1 C1GALT1      | K00731 |
| ENSG00000151914 | 0.218574  | 6.864664 | 0.740195 | 1 DST          | K10382 |
| ENSG00000161558 | 0.234286  | 2.955864 | 0.740206 | 1 TMEM143      | -      |
| ENSG00000116560 | -0.217377 | 8.322265 | 0.740297 | 1 SFPQ         | -      |
| ENSG00000120265 | 0.218152  | 7.065815 | 0.740405 | 1 PCMT1        | K00573 |
| ENSG00000196396 | 0.219572  | 6.112502 | 0.740515 | 1 PTPN1        | K05696 |
| ENSG00000115137 | 0.283184  | 1.892586 | 0.740515 | 1 DNAJC27      | K19372 |
| ENSG00000269973 | 0.283184  | 1.892586 | 0.740515 | 1 RP11-95D17.1 | -      |
| ENSG00000101695 | -0.237738 | 3.416967 | 0.740577 | 1 RNF125       | K12170 |
| ENSG00000094880 | -0.219173 | 5.950094 | 0.740621 | 1 CDC23        | K03355 |
| ENSG00000134070 | -0.260313 | 2.857896 | 0.740668 | 1 IRAK2        | K04731 |
| ENSG00000164828 | 0.217665  | 7.257607 | 0.740736 | 1 SUN1         | K19347 |
| ENSG00000099204 | 0.217978  | 6.928762 | 0.740789 | 1 ABLIM1       | K07520 |
| ENSG00000040608 | -0.221927 | 4.508992 | 0.740845 | 1 RTN4R        | K16659 |
| ENSG00000153250 | -0.218062 | 6.163166 | 0.740902 | 1 RBMS1        | -      |
| ENSG00000160193 | -0.222395 | 5.552847 | 0.740935 | 1 WDR4         | K15443 |
| ENSG00000100949 | -0.227401 | 4.273316 | 0.740967 | 1 RABGGTA      | K14050 |
| ENSG00000103479 | 0.22157   | 5.34079  | 0.740973 | 1 RBL2         | K16332 |
| ENSG00000127585 | 0.217893  | 6.315747 | 0.741002 | 1 FBXL16       | K10282 |
| ENSG00000121741 | -0.219919 | 5.937995 | 0.741035 | 1 ZMYM2        | -      |
| ENSG00000137055 | 0.218137  | 6.624632 | 0.741081 | 1 PLAA         | K14018 |
| ENSG00000110921 | -0.230165 | 3.988679 | 0.741136 | 1 MVK          | K00869 |
| ENSG00000089775 | 0.227032  | 4.432965 | 0.74121  | 1 ZBTB25       | K00288 |
| ENSG00000062822 | -0.218304 | 6.551545 | 0.741263 | 1 POLD1        | K02327 |
| ENSG00000164466 | 0.217394  | 7.023585 | 0.741333 | 1 SFXN1        | K12756 |
| ENSG00000189050 | 0.228783  | 4.182843 | 0.741406 | 1 RNFT1        | -      |
| ENSG00000117155 | -0.218305 | 6.464923 | 0.741439 | 1 SSX2IP       | K06085 |
| ENSG00000105373 | 0.216432  | 8.025303 | 0.741491 | 1 GLTSCR2      | K14840 |
| ENSG00000104412 | -0.219534 | 6.267507 | 0.741546 | 1 EMC2         | -      |
| ENSG00000011426 | 0.216299  | 8.152324 | 0.741565 | 1 ANLN         | K18621 |
| ENSG00000081692 | -0.224075 | 4.714894 | 0.741566 | 1 JMJD4        | K05062 |
| ENSG00000135587 | -0.226209 | 3.885661 | 0.741686 | 1 SMPD2        | K12351 |
| ENSG00000188566 | -0.224088 | 4.951347 | 0.741815 | 1 NDOR1        | -      |
| ENSG00000145191 | -0.220992 | 5.539721 | 0.741942 | 1 EIF2B5       | K03240 |
| ENSG00000105325 | 0.219311  | 5.860065 | 0.742196 | 1 FZR1         | K03364 |
| ENSG00000174444 | 0.215068  | 11.5549  | 0.7422   | 1 RPL4         | K02930 |
| ENSG00000256269 | -0.21832  | 5.645913 | 0.742244 | 1 HMBS         | K01749 |
| ENSG00000092201 | -0.215895 | 7.926626 | 0.742271 | 1 SUPT16H      | -      |
| ENSG00000057657 | 0.234838  | 3.76208  | 0.742324 | 1 PRDM1        | -      |
| ENSG00000167986 | 0.215399  | 8.627581 | 0.74236  | 1 DDB1         | K10610 |
| ENSG00000172974 | 0.216297  | 7.137712 | 0.742451 | 1 AC007318.5   | K15040 |
| ENSG00000073578 | 0.215126  | 8.963958 | 0.742545 | 1 SDHA         | K00234 |
| ENSG00000165806 | -0.218666 | 5.156892 | 0.742596 | 1 CASP7        | K04397 |
| ENSG00000166272 | -0.222355 | 4.813232 | 0.742616 | 1 WBP1L        | -      |

|                 |           |          |          |                 |        |
|-----------------|-----------|----------|----------|-----------------|--------|
| ENSG00000134285 | 0.224186  | 4.515905 | 0.742706 | 1 FKBP11        | K09576 |
| ENSG00000126603 | 0.220012  | 5.131317 | 0.742737 | 1 GLIS2         | K09233 |
| ENSG00000140043 | 0.223641  | 3.93859  | 0.742776 | 1 PTGR2         | K13949 |
| ENSG00000136108 | -0.215844 | 7.428818 | 0.742786 | 1 CKAP2         | K16769 |
| ENSG00000073614 | 0.217998  | 6.052252 | 0.742802 | 1 KDM5A         | K11446 |
| ENSG00000162496 | 0.221363  | 5.392915 | 0.742817 | 1 DHRS3         | K11146 |
| ENSG00000073792 | -0.219075 | 5.00962  | 0.742858 | 1 IGF2BP2       | K17392 |
| ENSG00000118620 | -0.246853 | 2.979326 | 0.742872 | 1 ZNF430        | K09228 |
| ENSG00000186193 | -0.21704  | 6.09109  | 0.742891 | 1 SAPCD2        | -      |
| ENSG00000101574 | -0.222611 | 4.483759 | 0.742929 | 1 METTL4        | -      |
| ENSG00000104969 | 0.216437  | 6.666716 | 0.742964 | 1 SGTA          | K12581 |
| ENSG00000177469 | 0.214949  | 8.267488 | 0.743056 | 1 PTRF          | K19387 |
| ENSG00000009413 | 0.223218  | 4.843996 | 0.743182 | 1 REV3L         | K02350 |
| ENSG00000103168 | -0.220227 | 5.063026 | 0.743189 | 1 TAF1C         | K15214 |
| ENSG00000269640 | -0.244088 | 2.875502 | 0.743528 | 1 CTD-2521M24.9 | -      |
| ENSG00000135845 | -0.218107 | 5.513106 | 0.743547 | 1 PIGC          | -      |
| ENSG00000235560 | -0.322012 | 1.096649 | 0.743746 | 1 AC002310.12   | -      |
| ENSG00000109919 | -0.215214 | 7.170246 | 0.743818 | 1 MTCH2         | K17885 |
| ENSG00000167118 | -0.21716  | 5.671928 | 0.743826 | 1 URM1          | K12161 |
| ENSG00000121892 | -0.215067 | 7.300186 | 0.743827 | 1 PDS5A         | K11267 |
| ENSG00000185551 | -0.218865 | 5.209942 | 0.744052 | 1 NR2F2         | K08548 |
| ENSG00000119778 | -0.238389 | 3.181173 | 0.7441   | 1 ATAD2B        | -      |
| ENSG00000188493 | 0.227729  | 3.716171 | 0.74428  | 1 C19orf54      | -      |
| ENSG00000271122 | 0.252608  | 2.742569 | 0.744283 | 1 RP11-379H18.1 | -      |
| ENSG00000216490 | -0.240865 | 2.763592 | 0.744283 | 1 IFI30         | K08059 |
| ENSG00000198026 | 0.222401  | 4.559382 | 0.744287 | 1 ZNF335        | K10653 |
| ENSG00000178927 | 0.214958  | 6.23819  | 0.744332 | 1 C17orf62      | -      |
| ENSG00000154174 | -0.215019 | 6.9266   | 0.744385 | 1 TOMM70A       | K17768 |
| ENSG00000134684 | -0.213509 | 8.53625  | 0.744644 | 1 YARS          | K01866 |
| ENSG00000157014 | -0.225612 | 4.378168 | 0.744683 | 1 TATDN2        | K03424 |
| ENSG00000113272 | -0.232789 | 4.061378 | 0.744708 | 1 THG1L         | K10761 |
| ENSG00000119655 | 0.214932  | 6.636142 | 0.744749 | 1 NPC2          | K13443 |
| ENSG00000198925 | 0.21504   | 6.560952 | 0.744756 | 1 ATG9A         | K17907 |
| ENSG00000180891 | -0.21694  | 5.259964 | 0.744856 | 1 CUEDC1        | -      |
| ENSG00000157538 | 0.215717  | 6.038287 | 0.744902 | 1 DSCR3         | K11447 |
| ENSG00000105671 | 0.214908  | 6.150067 | 0.745001 | 1 DDX49         | K14778 |
| ENSG00000179941 | -0.226037 | 4.010552 | 0.745083 | 1 BBS10         | K19401 |
| ENSG00000087053 | -0.214493 | 6.866669 | 0.745085 | 1 MTMR2         | K18081 |
| ENSG00000112110 | -0.21589  | 6.287846 | 0.745113 | 1 MRPL18        | K02881 |
| ENSG00000070718 | 0.227404  | 4.156024 | 0.745203 | 1 AP3M2         | K12398 |
| ENSG00000124713 | 0.414359  | 0.60836  | 0.745262 | 1 GNMT          | K00552 |
| ENSG00000125966 | 0.414359  | 0.60836  | 0.745262 | 1 MMP24         | K08002 |
| ENSG00000143110 | 0.414359  | 0.60836  | 0.745262 | 1 C1orf162      | -      |
| ENSG00000169446 | 0.414359  | 0.60836  | 0.745262 | 1 MMGT1         | -      |
| ENSG00000223797 | 0.414359  | 0.60836  | 0.745262 | 1 ENTPD3-AS1    | -      |
| ENSG00000255100 | 0.414359  | 0.60836  | 0.745262 | 1 RP11-21L23.3  | -      |
| ENSG00000126458 | -0.216972 | 5.34758  | 0.745281 | 1 RRAS          | K07829 |
| ENSG00000132481 | -0.216054 | 5.524573 | 0.745392 | 1 TRIM47        | K12023 |
| ENSG00000049449 | -0.212545 | 9.413402 | 0.745429 | 1 RCN1          | -      |
| ENSG00000155906 | -0.221266 | 4.533792 | 0.745448 | 1 RMND1         | -      |
| ENSG00000263711 | -0.229229 | 3.963607 | 0.745484 | 1 RP11-169F17.1 | K17985 |
| ENSG00000120071 | 0.226796  | 3.958453 | 0.745484 | 1 KANSL1        | K18400 |
| ENSG00000143147 | -0.224014 | 3.960737 | 0.745484 | 1 GPR161        | K08439 |
| ENSG00000084444 | -0.232127 | 2.995552 | 0.745485 | 1 KIAA1467      | -      |
| ENSG00000135966 | -0.218971 | 4.831801 | 0.7456   | 1 TGFBRAP1      | -      |
| ENSG00000189306 | -0.214785 | 6.398453 | 0.745629 | 1 RRP7A         | K14545 |
| ENSG00000168495 | 0.218165  | 4.998931 | 0.745672 | 1 POLR3D        | K03026 |
| ENSG00000136940 | -0.219763 | 4.499324 | 0.745736 | 1 PDCL          | K09228 |

|                 |           |           |          |                  |        |
|-----------------|-----------|-----------|----------|------------------|--------|
| ENSG00000111788 | -0.22274  | 4.607548  | 0.745775 | 1 RP11-22B23.1   | K11273 |
| ENSG00000169026 | -0.271579 | 1.953573  | 0.745803 | 1 MFSD7          | K12306 |
| ENSG00000077616 | 0.572238  | -0.078186 | 0.745855 | 1 NAALAD2        | K01301 |
| ENSG00000092068 | 0.572238  | -0.078186 | 0.745855 | 1 SLC7A8         | K13781 |
| ENSG00000099840 | 0.572238  | -0.078186 | 0.745855 | 1 IZUMO4         | -      |
| ENSG00000185291 | 0.572238  | -0.078186 | 0.745855 | 1 IL3RA          | K04737 |
| ENSG00000188263 | 0.572238  | -0.078186 | 0.745855 | 1 IL17REL        | -      |
| ENSG00000204262 | 0.572238  | -0.078186 | 0.745855 | 1 COL5A2         | K19721 |
| ENSG00000235387 | 0.572238  | -0.078186 | 0.745855 | 1 LINC00961      | -      |
| ENSG00000235529 | 0.572238  | -0.078186 | 0.745855 | 1 AGAP1-IT1      | -      |
| ENSG00000253671 | 0.572238  | -0.078186 | 0.745855 | 1 RP11-806O11.1  | -      |
| ENSG00000269965 | 0.572238  | -0.078186 | 0.745855 | 1 RP11-24B19.4   | -      |
| ENSG00000166819 | 0.448518  | -0.022581 | 0.745855 | 1 PLIN1          | K08768 |
| ENSG00000176933 | 0.448518  | -0.022581 | 0.745855 | 1 TOB2P1         | K14443 |
| ENSG00000184886 | 0.448518  | -0.022581 | 0.745855 | 1 PIGW           | K05283 |
| ENSG00000185482 | 0.448518  | -0.022581 | 0.745855 | 1 STAC3          | -      |
| ENSG00000213252 | 0.448518  | -0.022581 | 0.745855 | 1 RP11-819M15.1  | -      |
| ENSG00000229994 | 0.448518  | -0.022581 | 0.745855 | 1 RPL5P4         | K02932 |
| ENSG00000235245 | 0.448518  | -0.022581 | 0.745855 | 1 RP11-122K13.12 | -      |
| ENSG00000250471 | 0.448518  | -0.022581 | 0.745855 | 1 GMPSP1         | K01951 |
| ENSG00000260388 | 0.448518  | -0.022581 | 0.745855 | 1 LINC00562      | -      |
| ENSG00000272417 | 0.448518  | -0.022581 | 0.745855 | 1 CTD-2199O4.6   | -      |
| ENSG00000272807 | 0.448518  | -0.022581 | 0.745855 | 1 RP11-260M2.1   | -      |
| ENSG00000273448 | 0.448518  | -0.022581 | 0.745855 | 1 RP11-166O4.6   | -      |
| ENSG00000010017 | 0.214604  | 6.386184  | 0.745943 | 1 RANBP9         | -      |
| ENSG00000161202 | 0.214362  | 6.214146  | 0.745999 | 1 DVL3           | K02353 |
| ENSG00000167965 | -0.213375 | 6.388555  | 0.746194 | 1 MLST8          | K08266 |
| ENSG00000020633 | 0.23109   | 2.485881  | 0.746206 | 1 RUNX3          | K09279 |
| ENSG00000136527 | -0.212861 | 7.380746  | 0.746279 | 1 TRA2B          | K12897 |
| ENSG00000121350 | -0.222778 | 4.646558  | 0.746345 | 1 PYROXD1        | -      |
| ENSG00000007255 | 0.223139  | 3.850069  | 0.746378 | 1 TRAPPC6A       | -      |
| ENSG00000157510 | 0.223139  | 3.850069  | 0.746378 | 1 AFAP1L1        | -      |
| ENSG00000099864 | 0.214492  | 6.251502  | 0.746558 | 1 PALM           | K16519 |
| ENSG00000172172 | -0.213147 | 6.852717  | 0.746659 | 1 MRPL13         | K02871 |
| ENSG00000163156 | -0.214118 | 5.689016  | 0.746707 | 1 SCNMI          | K17985 |
| ENSG00000119787 | -0.214277 | 6.231823  | 0.74675  | 1 ATL2           | K17339 |
| ENSG00000161203 | 0.211448  | 8.976888  | 0.746792 | 1 AP2M1          | K11826 |
| ENSG00000132383 | 0.2118    | 7.913192  | 0.746915 | 1 RPA1           | K07466 |
| ENSG00000186130 | -0.22001  | 4.582148  | 0.746931 | 1 ZBTB6          | K10493 |
| ENSG00000105254 | -0.214839 | 5.605091  | 0.747022 | 1 TBCB           | K17262 |
| ENSG00000115998 | -0.231497 | 3.111699  | 0.747154 | 1 C2orf42        | -      |
| ENSG00000132432 | 0.21228   | 7.059879  | 0.747179 | 1 SEC61G         | K07342 |
| ENSG00000106689 | 0.248714  | 2.768652  | 0.747295 | 1 LHX2           | K09373 |
| ENSG00000183421 | 0.290697  | 1.703753  | 0.747485 | 1 RIPK4          | K08848 |
| ENSG00000165912 | -0.212074 | 7.127973  | 0.747495 | 1 PACSIN3        | -      |
| ENSG00000164542 | -0.216678 | 5.208755  | 0.747643 | 1 KIAA0895       | -      |
| ENSG00000188786 | 0.224087  | 4.021996  | 0.747649 | 1 MTF1           | -      |
| ENSG00000159346 | 0.211783  | 7.074933  | 0.747735 | 1 ADIPOR1        | K07297 |
| ENSG00000064666 | -0.212604 | 6.58891   | 0.747748 | 1 CNN2           | K15411 |
| ENSG00000105281 | -0.211055 | 8.002418  | 0.747803 | 1 SLC1A5         | K05616 |
| ENSG00000105953 | 0.211234  | 7.60674   | 0.747809 | 1 OGDH           | K00164 |
| ENSG00000163882 | 0.212183  | 6.694517  | 0.747819 | 1 POLR2H         | K03016 |
| ENSG00000161326 | -0.218145 | 4.903821  | 0.747966 | 1 DUSP14         | K14165 |
| ENSG00000117016 | 0.240196  | 2.99475   | 0.748046 | 1 RIMS3          | K15298 |
| ENSG00000065427 | -0.211117 | 7.60638   | 0.74806  | 1 KARS           | K04567 |
| ENSG00000086827 | -0.215471 | 4.81632   | 0.748072 | 1 ZW10           | K11578 |
| ENSG00000151276 | 0.219302  | 3.972584  | 0.748137 | 1 MAGI1          | K05631 |
| ENSG00000073905 | 0.224814  | 3.457254  | 0.748257 | 1 VDAC1P1        | K05862 |

|                 |           |          |          |                   |        |
|-----------------|-----------|----------|----------|-------------------|--------|
| ENSG00000137413 | -0.222563 | 4.440017 | 0.748283 | 1 TAF8            | K14649 |
| ENSG00000198680 | -0.222563 | 4.440017 | 0.748283 | 1 TUSC1           | -      |
| ENSG00000177425 | -0.211224 | 7.210164 | 0.74837  | 1 PAWR            | K09228 |
| ENSG00000119686 | 0.238777  | 2.648258 | 0.748426 | 1 FLVCR2          | K08220 |
| ENSG00000234444 | -0.230632 | 3.615881 | 0.748643 | 1 ZNF736          | -      |
| ENSG00000147471 | -0.218218 | 5.044554 | 0.748658 | 1 PROSC           | K06997 |
| ENSG00000164338 | -0.214396 | 4.908194 | 0.74866  | 1 UTP15           | K14549 |
| ENSG00000177030 | -0.222052 | 4.591277 | 0.748664 | 1 DEAF1           | -      |
| ENSG00000267317 | -0.218983 | 4.481777 | 0.74885  | 1 CTB-25B13.12    | -      |
| ENSG00000135624 | -0.209518 | 9.391082 | 0.748937 | 1 CCT7            | K09499 |
| ENSG00000140575 | 0.209598  | 8.895884 | 0.74896  | 1 IQGAP1          | K16848 |
| ENSG00000091409 | -0.211334 | 6.721454 | 0.748969 | 1 ITGA6           | K06485 |
| ENSG00000174886 | -0.212397 | 5.669351 | 0.749057 | 1 NDUFA11         | K03956 |
| ENSG00000116288 | -0.210273 | 7.497614 | 0.749143 | 1 PARK7           | K05687 |
| ENSG00000038274 | -0.211106 | 6.746561 | 0.749188 | 1 MAT2B           | K00789 |
| ENSG00000132792 | -0.213623 | 5.527426 | 0.749191 | 1 CTNNBL1         | K12864 |
| ENSG00000109911 | -0.228448 | 3.873779 | 0.749221 | 1 ELP4            | K11375 |
| ENSG00000130529 | -0.217208 | 4.696392 | 0.749303 | 1 TRPM4           | K04979 |
| ENSG00000121579 | -0.209527 | 8.305374 | 0.749373 | 1 NAA50           | -      |
| ENSG00000020129 | 0.220072  | 4.517847 | 0.749386 | 1 NCDN            | -      |
| ENSG00000132740 | 0.216047  | 4.0855   | 0.749633 | 1 IGHMBP2         | K19036 |
| ENSG00000132692 | 0.27595   | 1.440512 | 0.749699 | 1 BCAN            | K06795 |
| ENSG00000254681 | 0.27595   | 1.440512 | 0.749699 | 1 PKD1P5          | K04985 |
| ENSG00000266970 | 0.27595   | 1.440512 | 0.749699 | 1 RP11-806H10.4   | -      |
| ENSG00000272872 | 0.27595   | 1.440512 | 0.749699 | 1 LL22NC03-N14H11 | -      |
| ENSG00000251333 | -0.26674  | 1.472422 | 0.749699 | 1 RTN3P1          | -      |
| ENSG00000267432 | -0.26674  | 1.472422 | 0.749699 | 1 RP11-559N14.5   | -      |
| ENSG00000249936 | -0.246979 | 2.517822 | 0.749762 | 1 RAC1P2          | K04392 |
| ENSG00000011677 | 0.243748  | 2.508725 | 0.749762 | 1 GABRA3          | K05175 |
| ENSG00000172006 | 0.243748  | 2.508725 | 0.749762 | 1 ZNF554          | K09228 |
| ENSG00000135541 | 0.213428  | 5.47318  | 0.749775 | 1 AH11            | K16740 |
| ENSG00000119979 | -0.214381 | 5.374232 | 0.749856 | 1 FAM45A          | -      |
| ENSG00000007545 | 0.216757  | 4.27651  | 0.749942 | 1 CRAMP1L         | -      |
| ENSG00000198315 | 0.213578  | 5.352662 | 0.750077 | 1 ZKSCAN8         | K09229 |
| ENSG00000213551 | -0.213462 | 5.355091 | 0.750077 | 1 DNAJC9          | K09529 |
| ENSG00000196715 | -0.211569 | 6.240548 | 0.750185 | 1 VKORC1L1        | K05357 |
| ENSG00000034533 | -0.247636 | 2.795726 | 0.750238 | 1 ASTE1           | K01537 |
| ENSG00000164733 | 0.208694  | 8.333447 | 0.750251 | 1 CTSB            | K01363 |
| ENSG00000167635 | -0.20942  | 7.32611  | 0.750316 | 1 ZNF146          | K09228 |
| ENSG00000172977 | 0.213869  | 4.598003 | 0.750374 | 1 KAT5            | K11304 |
| ENSG00000110871 | -0.212796 | 5.418955 | 0.750404 | 1 COQ5            | K06127 |
| ENSG00000138629 | -0.212245 | 6.110888 | 0.750453 | 1 UBL7            | -      |
| ENSG00000141349 | -0.211611 | 6.362173 | 0.750465 | 1 G6PC3           | K01084 |
| ENSG00000120697 | -0.215011 | 5.001425 | 0.750475 | 1 ALG5            | K00729 |
| ENSG00000104866 | 0.214582  | 4.734518 | 0.750531 | 1 PPP1R37         | K17576 |
| ENSG00000115289 | -0.219484 | 4.411453 | 0.75061  | 1 PCGF1           | K11487 |
| ENSG00000064703 | -0.210041 | 6.321121 | 0.750675 | 1 DDX20           | K13131 |
| ENSG00000187713 | -0.212108 | 5.882646 | 0.750695 | 1 TMEM203         | -      |
| ENSG00000171862 | 0.209416  | 6.833017 | 0.750798 | 1 PTEN            | K01110 |
| ENSG00000129911 | 0.21191   | 5.625885 | 0.75084  | 1 KLF16           | K09208 |
| ENSG00000121281 | -0.261598 | 1.997824 | 0.750881 | 1 ADCY7           | -      |
| ENSG00000176438 | -0.261598 | 1.997824 | 0.750881 | 1 SYNE3           | K15696 |
| ENSG00000163867 | -0.233271 | 3.396217 | 0.750954 | 1 ZMYM6           | -      |
| ENSG00000160298 | 0.215638  | 4.28555  | 0.750996 | 1 C21orf58        | -      |
| ENSG00000167646 | 0.223998  | 3.69266  | 0.75119  | 1 DNAAF3          | K19752 |
| ENSG00000090263 | -0.210773 | 5.521715 | 0.751191 | 1 MRPS33          | K17411 |
| ENSG00000177383 | -0.210375 | 5.901096 | 0.751228 | 1 MAGEF1          | -      |
| ENSG00000143442 | -0.211139 | 6.065163 | 0.751322 | 1 POGZ            | K02864 |

|                 |           |          |          |               |        |
|-----------------|-----------|----------|----------|---------------|--------|
| ENSG00000182484 | -0.243033 | 2.372669 | 0.751363 | 1 WASH6P      | K18461 |
| ENSG00000136002 | 0.210734  | 5.855511 | 0.751379 | 1 ARHGGEF4    | K05769 |
| ENSG00000113812 | -0.218151 | 4.053332 | 0.751405 | 1 ACTR8       | K11673 |
| ENSG00000196367 | 0.212617  | 5.230538 | 0.751535 | 1 TRRAP       | K08874 |
| ENSG00000196517 | 0.21409   | 5.48401  | 0.751627 | 1 SLC6A9      | K05038 |
| ENSG00000144028 | 0.207547  | 8.230068 | 0.751636 | 1 SNRNP200    | K12854 |
| ENSG00000178607 | 0.240731  | 2.90975  | 0.751746 | 1 ERN1        | K08852 |
| ENSG00000116151 | 0.228039  | 2.915912 | 0.751746 | 1 MORN1       | -      |
| ENSG00000205356 | 0.228039  | 2.915912 | 0.751746 | 1 TECPR1      | K17988 |
| ENSG00000081154 | -0.20769  | 7.895913 | 0.751776 | 1 PCNP        | -      |
| ENSG00000173915 | -0.208437 | 7.067212 | 0.751778 | 1 USMG5       | K18194 |
| ENSG00000154642 | -0.236973 | 3.136965 | 0.751833 | 1 C21orf91    | -      |
| ENSG00000260565 | -0.236973 | 3.136965 | 0.751833 | 1 ERVK13-1    | -      |
| ENSG00000120438 | -0.207283 | 8.558536 | 0.751837 | 1 TCP1        | K09493 |
| ENSG00000106144 | -0.212443 | 5.467294 | 0.751853 | 1 CASP2       | K02186 |
| ENSG00000102034 | 0.212764  | 5.542633 | 0.751866 | 1 ELF4        | K09428 |
| ENSG00000065060 | -0.21036  | 5.720106 | 0.751893 | 1 UHRF1BP1    | K17985 |
| ENSG00000102172 | -0.207134 | 8.736512 | 0.751928 | 1 SMS         | K00802 |
| ENSG00000107338 | -0.225419 | 3.480972 | 0.751932 | 1 SHB         | -      |
| ENSG00000138768 | -0.208458 | 6.930942 | 0.751949 | 1 USO1        | -      |
| ENSG00000143476 | 0.208335  | 6.868009 | 0.751996 | 1 DTL         | K11790 |
| ENSG00000142961 | 0.224936  | 3.883141 | 0.752001 | 1 MOB3C       | -      |
| ENSG00000135452 | -0.212376 | 4.38018  | 0.752048 | 1 TSPAN31     | K17356 |
| ENSG00000118762 | -0.214501 | 4.462002 | 0.752053 | 1 PKD2        | K04986 |
| ENSG00000188157 | -0.20704  | 8.649941 | 0.752075 | 1 AGRN        | K06254 |
| ENSG00000149639 | 0.210924  | 5.720499 | 0.752283 | 1 SOGA1       | K11447 |
| ENSG00000166855 | -0.208912 | 6.420121 | 0.752349 | 1 CLPX        | K03544 |
| ENSG00000067596 | 0.208206  | 6.205828 | 0.752371 | 1 DHX8        | K12818 |
| ENSG00000198589 | 0.210289  | 5.063382 | 0.752383 | 1 LRBA        | -      |
| ENSG00000110583 | 0.215374  | 4.644367 | 0.752471 | 1 NAA40       | -      |
| ENSG00000166949 | 0.208952  | 5.737052 | 0.752474 | 1 SMAD3       | K04500 |
| ENSG00000116729 | 0.207314  | 7.402376 | 0.752534 | 1 WLS         | -      |
| ENSG00000110651 | 0.207207  | 7.522797 | 0.752542 | 1 CD81        | K06508 |
| ENSG00000113522 | -0.210219 | 6.254965 | 0.752632 | 1 RAD50       | K10866 |
| ENSG00000113734 | -0.226119 | 3.949458 | 0.752668 | 1 BNIP1       | K08497 |
| ENSG00000015568 | 0.300388  | 1.095694 | 0.752733 | 1 RGPD5       | K12172 |
| ENSG00000161544 | 0.300388  | 1.095694 | 0.752733 | 1 CYGB        | -      |
| ENSG00000188511 | 0.300388  | 1.095694 | 0.752733 | 1 C22orf34    | -      |
| ENSG00000236682 | 0.300388  | 1.095694 | 0.752733 | 1 AC068282.3  | -      |
| ENSG00000260276 | 0.300388  | 1.095694 | 0.752733 | 1 RP11-77H9.2 | -      |
| ENSG00000267493 | 0.300388  | 1.095694 | 0.752733 | 1 CIRBP-AS1   | -      |
| ENSG00000110200 | -0.22148  | 3.702469 | 0.752753 | 1 ANAPC15     | -      |
| ENSG00000134504 | -0.212589 | 4.814753 | 0.752798 | 1 KCTD1       | -      |
| ENSG00000165490 | -0.209962 | 5.741557 | 0.752858 | 1 C11orf82    | K08857 |
| ENSG00000146833 | -0.230091 | 3.412719 | 0.752866 | 1 TRIM4       | K11998 |
| ENSG00000112297 | -0.227393 | 3.237816 | 0.752936 | 1 AIM1        | -      |
| ENSG00000172613 | 0.214532  | 4.294533 | 0.753079 | 1 RAD9A       | K10994 |
| ENSG00000165516 | -0.212117 | 5.287144 | 0.753134 | 1 KLHDC2      | -      |
| ENSG00000171320 | -0.211187 | 4.786447 | 0.753183 | 1 ESCO2       | K11268 |
| ENSG00000121957 | 0.20724   | 6.921493 | 0.753187 | 1 GPSM2       | K15837 |
| ENSG00000161813 | -0.206843 | 7.369426 | 0.753247 | 1 LARP4       | K18763 |
| ENSG00000135632 | -0.211815 | 5.43626  | 0.753271 | 1 SMYD5       | -      |
| ENSG00000145016 | 0.221035  | 4.002994 | 0.753282 | 1 KIAA0226    | K19330 |
| ENSG00000124357 | 0.215162  | 4.005792 | 0.753282 | 1 NAGK        | K00884 |
| ENSG00000166171 | 0.215162  | 4.005792 | 0.753282 | 1 DPCD        | -      |
| ENSG00000140464 | 0.209994  | 5.043556 | 0.753319 | 1 PML         | K10054 |
| ENSG00000226564 | 0.257593  | 2.181229 | 0.75332  | 1 FTH1P20     | K00522 |
| ENSG00000196924 | -0.238117 | 2.21117  | 0.75332  | 1 FLNA        | K04437 |

|                 |           |          |          |                 |        |
|-----------------|-----------|----------|----------|-----------------|--------|
| ENSG00000113048 | -0.206351 | 7.812427 | 0.753393 | 1 MRPS27        | K17406 |
| ENSG00000167657 | 0.208916  | 6.126998 | 0.753417 | 1 DAPK3         | K08803 |
| ENSG00000152082 | -0.208154 | 5.870721 | 0.753498 | 1 MZT2B         | K16574 |
| ENSG00000166444 | 0.208746  | 5.375051 | 0.753568 | 1 ST5           | -      |
| ENSG00000144744 | -0.208216 | 6.225997 | 0.753606 | 1 UBA3          | K10686 |
| ENSG00000134262 | -0.220654 | 4.2596   | 0.753639 | 1 AP4B1         | K12401 |
| ENSG00000214706 | -0.222509 | 3.496542 | 0.75373  | 1 IFRD2         | -      |
| ENSG00000175265 | -0.207338 | 6.168074 | 0.753811 | 1 GOLGA8A       | K10582 |
| ENSG00000112339 | 0.208241  | 5.901763 | 0.754154 | 1 HBS1L         | K14416 |
| ENSG00000169733 | -0.207874 | 5.482073 | 0.754156 | 1 RFNG          | K05948 |
| ENSG00000078699 | 0.213882  | 4.819366 | 0.754243 | 1 CBFA2T2       | K17985 |
| ENSG00000121749 | 0.20685   | 6.518459 | 0.754281 | 1 TBC1D15       | -      |
| ENSG00000005812 | -0.207729 | 5.782731 | 0.754333 | 1 FBXL3         | K10269 |
| ENSG00000134253 | -0.230277 | 2.945145 | 0.754371 | 1 TRIM45        | K12021 |
| ENSG00000225485 | -0.219564 | 2.939164 | 0.754371 | 1 ARHGAP23      | -      |
| ENSG00000198464 | -0.215755 | 3.575772 | 0.754502 | 1 ZNF480        | K09228 |
| ENSG00000092199 | -0.20466  | 9.574915 | 0.754522 | 1 HNRNPC        | K12884 |
| ENSG00000127824 | 0.205164  | 7.89132  | 0.754612 | 1 TUBA4A        | K07374 |
| ENSG00000085982 | -0.214332 | 4.731441 | 0.754769 | 1 USP40         | K11869 |
| ENSG00000169032 | 0.206449  | 6.480125 | 0.754816 | 1 MAP2K1        | K04368 |
| ENSG00000158552 | 0.220862  | 4.168342 | 0.754862 | 1 ZFAND2B       | -      |
| ENSG00000185009 | 0.206421  | 6.463308 | 0.754879 | 1 AP3M1         | K12398 |
| ENSG00000047249 | 0.206018  | 6.718035 | 0.754902 | 1 ATP6V1H       | K02144 |
| ENSG00000162972 | -0.21327  | 4.8287   | 0.754959 | 1 C2orf47       | -      |
| ENSG00000196922 | -0.211247 | 4.975188 | 0.755012 | 1 ZNF252P       | K09228 |
| ENSG00000117036 | -0.215088 | 4.315647 | 0.755127 | 1 ETV3          | K09433 |
| ENSG00000100387 | -0.206459 | 6.434384 | 0.755151 | 1 RBX1          | K03868 |
| ENSG00000154710 | 0.244838  | 2.388304 | 0.755155 | 1 RABGEF1       | -      |
| ENSG00000090581 | 0.20738   | 5.722159 | 0.755207 | 1 GNPTG         | K10087 |
| ENSG00000115935 | -0.209755 | 4.699735 | 0.75522  | 1 WIPF1         | K19475 |
| ENSG00000151553 | -0.208177 | 5.601489 | 0.755266 | 1 FAM160B1      | -      |
| ENSG00000122008 | -0.211517 | 5.005514 | 0.755274 | 1 POLK          | K03511 |
| ENSG00000186642 | 0.204415  | 8.139705 | 0.755319 | 1 PDE2A         | K18283 |
| ENSG00000137876 | -0.204711 | 7.679618 | 0.755407 | 1 RSL24D1       | K02896 |
| ENSG00000269858 | 0.218126  | 3.840974 | 0.755525 | 1 EGLN2         | K09592 |
| ENSG00000100263 | -0.2093   | 5.033873 | 0.755526 | 1 RHBDD3        | -      |
| ENSG00000117000 | 0.206187  | 5.030194 | 0.755526 | 1 RLF           | -      |
| ENSG00000104863 | 0.241337  | 2.819437 | 0.755926 | 1 LIN7B         | -      |
| ENSG00000267427 | 0.205389  | 6.522758 | 0.755963 | 1 CTC-503J8.6   | -      |
| ENSG00000131149 | 0.205957  | 6.341926 | 0.756157 | 1 GSE1          | -      |
| ENSG00000116830 | -0.207557 | 5.959298 | 0.75623  | 1 TTF2          | K15173 |
| ENSG0000012963  | 0.208169  | 5.187828 | 0.756301 | 1 UBR7          | K11979 |
| ENSG00000162241 | 0.22858   | 3.156242 | 0.756344 | 1 SLC25A45      | K15123 |
| ENSG00000186283 | -0.207319 | 5.74728  | 0.756498 | 1 TOR3A         | -      |
| ENSG00000196757 | 0.215291  | 4.360114 | 0.756512 | 1 ZNF700        | K09228 |
| ENSG00000023734 | -0.203287 | 8.423434 | 0.75654  | 1 STRAP         | K13137 |
| ENSG00000214110 | 0.300766  | 1.486524 | 0.756575 | 1 LDHAP4        | K00016 |
| ENSG00000273162 | 0.300766  | 1.486524 | 0.756575 | 1 RP11-108L7.15 | -      |
| ENSG00000130684 | 0.265289  | 1.504097 | 0.756575 | 1 ZNF337        | K09228 |
| ENSG00000142168 | -0.203988 | 7.338641 | 0.756589 | 1 SOD1          | K04565 |
| ENSG00000159658 | -0.205129 | 6.418085 | 0.756723 | 1 EFCAB14       | -      |
| ENSG00000224861 | 0.221914  | 3.654868 | 0.756782 | 1 YBX1P1        | K09276 |
| ENSG00000130021 | -0.210794 | 4.80694  | 0.75683  | 1 HDHD1         | K17623 |
| ENSG00000111554 | -0.219505 | 3.855619 | 0.75691  | 1 MDM1          | K17886 |
| ENSG00000031823 | 0.204792  | 6.085573 | 0.756946 | 1 RANBP3        | K15304 |
| ENSG00000154144 | -0.222034 | 4.0321   | 0.757006 | 1 TBRG1         | K04613 |
| ENSG00000092758 | 0.218285  | 4.024757 | 0.757006 | 1 COL9A3        | K08131 |
| ENSG00000129515 | -0.205358 | 6.269818 | 0.757036 | 1 SNX6          | K17920 |

|                 |           |          |          |                 |        |
|-----------------|-----------|----------|----------|-----------------|--------|
| ENSG00000219481 | -0.212009 | 4.744567 | 0.75704  | 1 NBPF1         | -      |
| ENSG00000183617 | -0.219579 | 4.186867 | 0.757082 | 1 MRPL54        | K17435 |
| ENSG00000102038 | -0.391285 | 0.698644 | 0.7571   | 1 SMARCA1       | K11727 |
| ENSG00000114378 | 0.344543  | 0.642022 | 0.7571   | 1 HYAL1         | K01197 |
| ENSG00000165949 | 0.344543  | 0.642022 | 0.7571   | 1 IFI27         | -      |
| ENSG00000198863 | -0.209617 | 5.016381 | 0.757155 | 1 RUNDC1        | -      |
| ENSG00000102931 | -0.205743 | 5.539724 | 0.757178 | 1 ARL2BP        | K16742 |
| ENSG00000158062 | -0.212213 | 4.452011 | 0.757193 | 1 UBXN11        | -      |
| ENSG00000143183 | 0.204226  | 6.581688 | 0.757204 | 1 TMCO1         | K01489 |
| ENSG00000123636 | -0.226817 | 3.515903 | 0.75725  | 1 BAZ2B         | -      |
| ENSG00000117713 | 0.207696  | 5.310149 | 0.757257 | 1 ARID1A        | K11653 |
| ENSG00000115750 | -0.219713 | 3.920734 | 0.757385 | 1 TAF1B         | K15213 |
| ENSG00000205571 | -0.215432 | 4.236495 | 0.757458 | 1 SMN2          | K13129 |
| ENSG00000106348 | -0.203758 | 6.867463 | 0.757484 | 1 IMPDH1        | K00088 |
| ENSG00000178229 | -0.273667 | 2.231417 | 0.757515 | 1 ZNF543        | K09228 |
| ENSG00000099250 | 0.210703  | 4.711265 | 0.757535 | 1 NRP1          | K06724 |
| ENSG00000065150 | -0.202184 | 8.710316 | 0.757683 | 1 IPO5          | -      |
| ENSG00000229809 | -0.251627 | 2.711281 | 0.757734 | 1 ZNF688        | K09228 |
| ENSG00000126749 | -0.239045 | 2.70419  | 0.757734 | 1 EMG1          | K14568 |
| ENSG00000237523 | -0.229778 | 3.065264 | 0.757802 | 1 LINC00857     | -      |
| ENSG00000064547 | 0.219843  | 3.065052 | 0.757802 | 1 LPAR2         | K04291 |
| ENSG00000163486 | 0.219843  | 3.065052 | 0.757802 | 1 SRGAP2        | K07526 |
| ENSG00000116752 | -0.204147 | 6.441971 | 0.757808 | 1 BCAS2         | K12861 |
| ENSG00000141448 | -0.215734 | 4.286757 | 0.757809 | 1 GATA6         | K17897 |
| ENSG00000174080 | 0.207306  | 4.8743   | 0.75801  | 1 CTSF          | K01373 |
| ENSG00000165916 | -0.202453 | 7.659616 | 0.758044 | 1 PSMC3         | K03065 |
| ENSG00000136938 | -0.202017 | 8.347859 | 0.758057 | 1 ANP32B        | K18647 |
| ENSG00000167601 | 0.202398  | 7.399755 | 0.758233 | 1 AXL           | K05115 |
| ENSG00000164284 | -0.203339 | 5.741563 | 0.75825  | 1 GRPEL2        | K03687 |
| ENSG00000163389 | -0.217314 | 3.867651 | 0.758279 | 1 POGLUT1       | K13667 |
| ENSG00000121691 | 0.204284  | 5.466247 | 0.758364 | 1 CAT           | K03781 |
| ENSG00000198455 | -0.207429 | 5.274743 | 0.758458 | 1 ZXDB          | -      |
| ENSG00000226054 | -0.251861 | 2.414755 | 0.758834 | 1 MEMO1P1       | K06990 |
| ENSG00000118855 | -0.206762 | 5.182437 | 0.758876 | 1 MFSD1         | -      |
| ENSG00000206417 | -0.282182 | 1.7984   | 0.758903 | 1 H1FX-AS1      | -      |
| ENSG00000095209 | -0.203775 | 5.947994 | 0.758939 | 1 TMEM38B       | -      |
| ENSG00000142453 | -0.203843 | 6.174163 | 0.758945 | 1 CARM1         | K05931 |
| ENSG00000090487 | -0.202236 | 6.980036 | 0.759079 | 1 SPG21         | K19367 |
| ENSG00000112144 | -0.228989 | 3.279081 | 0.759179 | 1 ICK           | K08828 |
| ENSG00000175048 | 0.214012  | 3.270053 | 0.759179 | 1 ZDHHC14       | K16675 |
| ENSG00000105926 | -0.205012 | 5.661587 | 0.759209 | 1 MPP6          | -      |
| ENSG00000173848 | -0.20322  | 5.890806 | 0.759216 | 1 NET1          | -      |
| ENSG00000165219 | 0.202577  | 6.444266 | 0.759364 | 1 GAPVD1        | K14209 |
| ENSG00000086015 | 0.202421  | 6.515089 | 0.759411 | 1 MAST2         | K08789 |
| ENSG00000198551 | -0.217284 | 3.608507 | 0.759458 | 1 ZNF627        | K09228 |
| ENSG00000102241 | -0.201706 | 7.148238 | 0.759465 | 1 HTATSF1       | K13093 |
| ENSG00000161714 | 0.201402  | 7.258678 | 0.759535 | 1 PLCD3         | K05857 |
| ENSG00000143653 | -0.202319 | 6.116605 | 0.759675 | 1 SCCPDH        | -      |
| ENSG00000254093 | -0.220774 | 3.370781 | 0.759739 | 1 PINX1         | K11135 |
| ENSG00000145779 | 0.201946  | 6.625464 | 0.759769 | 1 TNFAIP8       | -      |
| ENSG00000248131 | -0.23489  | 2.577468 | 0.759863 | 1 CT49          | -      |
| ENSG00000087206 | 0.203539  | 5.455283 | 0.760048 | 1 UIMC1         | K12581 |
| ENSG00000183955 | -0.20225  | 5.53784  | 0.760067 | 1 SETD8         | K11428 |
| ENSG00000186063 | -0.202421 | 5.479129 | 0.760165 | 1 AIDA          | -      |
| ENSG00000183530 | 0.204016  | 5.138841 | 0.760241 | 1 PRR14L        | K01613 |
| ENSG00000108384 | -0.203837 | 5.668496 | 0.76039  | 1 RAD51C        | K10870 |
| ENSG00000162194 | -0.201216 | 5.866983 | 0.760392 | 1 C11orf48      | -      |
| ENSG00000261355 | -0.272371 | 2.052285 | 0.76046  | 1 RP11-698N11.4 | -      |

|                 |           |          |          |                 |        |
|-----------------|-----------|----------|----------|-----------------|--------|
| ENSG00000228782 | -0.252241 | 2.040772 | 0.76046  | 1 MRPL45P2      | K17426 |
| ENSG00000143379 | 0.201442  | 5.896604 | 0.760559 | 1 SETDB1        | K11421 |
| ENSG00000228253 | 0.202343  | 6.18364  | 0.7606   | 1 MT-ATP8       | K02125 |
| ENSG00000204520 | 0.223099  | 3.531256 | 0.760673 | 1 MICA          | K07985 |
| ENSG00000003249 | 0.214933  | 3.535182 | 0.760673 | 1 DBNDD1        | -      |
| ENSG00000047617 | -0.233778 | 2.730716 | 0.760688 | 1 ANO2          | K19497 |
| ENSG00000257167 | -0.233778 | 2.730716 | 0.760688 | 1 TMPO-AS1      | -      |
| ENSG00000262049 | -0.233778 | 2.730716 | 0.760688 | 1 RP13-1032I1.7 | -      |
| ENSG00000147403 | 0.199899  | 7.908385 | 0.760712 | 1 RPL10         | K02866 |
| ENSG00000176946 | -0.203024 | 6.002319 | 0.760782 | 1 THAP4         | -      |
| ENSG00000056586 | -0.204822 | 5.52267  | 0.760822 | 1 RC3H2         | K15690 |
| ENSG00000144746 | 0.200932  | 6.688529 | 0.760841 | 1 ARL6IP5       | -      |
| ENSG00000117592 | -0.199306 | 9.16115  | 0.760861 | 1 PRDX6         | K11188 |
| ENSG00000153914 | -0.201051 | 6.69763  | 0.760902 | 1 SREK1         | K13165 |
| ENSG00000090861 | -0.199503 | 8.356455 | 0.760973 | 1 AARS          | K01872 |
| ENSG00000144362 | -0.337996 | 1.197386 | 0.761112 | 1 PHOSPHO2      | K13248 |
| ENSG00000250959 | -0.337996 | 1.197386 | 0.761112 | 1 GLUD1P3       | K00261 |
| ENSG00000267680 | -0.337996 | 1.197386 | 0.761112 | 1 ZNF224        | K17985 |
| ENSG00000213401 | 0.28544   | 1.176017 | 0.761112 | 1 MAGEA12       | -      |
| ENSG00000139154 | -0.200447 | 6.237096 | 0.761122 | 1 AEBP2         | K17452 |
| ENSG00000212664 | 0.207508  | 4.156209 | 0.761163 | 1 RP11-592N21.1 | K02880 |
| ENSG00000112624 | 0.211069  | 3.686046 | 0.76142  | 1 GLTSCR1L      | -      |
| ENSG00000101972 | 0.199327  | 7.640072 | 0.761581 | 1 STAG2         | K06671 |
| ENSG00000108961 | -0.217973 | 3.75855  | 0.761741 | 1 RANGRF        | K15117 |
| ENSG00000141446 | 0.202877  | 5.148775 | 0.761921 | 1 ESCO1         | K12900 |
| ENSG00000138078 | -0.203322 | 5.58698  | 0.761943 | 1 PREPL         | -      |
| ENSG00000152904 | -0.201705 | 6.194054 | 0.761962 | 1 GGPS1         | K00804 |
| ENSG00000185813 | -0.203552 | 4.90231  | 0.762037 | 1 PCYT2         | K00967 |
| ENSG00000188428 | -0.208976 | 4.742918 | 0.762039 | 1 BLOC1S5       | K04613 |
| ENSG00000142892 | -0.199896 | 6.817077 | 0.762041 | 1 PIGK          | K05290 |
| ENSG00000105193 | 0.19787   | 10.02053 | 0.762305 | 1 RPS16         | K02960 |
| ENSG00000133624 | 0.217207  | 3.085928 | 0.762406 | 1 ZNF767        | K09228 |
| ENSG00000120075 | 0.240042  | 2.421573 | 0.762406 | 1 HOXB5         | K09305 |
| ENSG00000261740 | 0.222157  | 2.430377 | 0.762406 | 1 RP11-345J4.5  | K08873 |
| ENSG00000074842 | 0.198801  | 7.394529 | 0.762415 | 1 C19orf10      | -      |
| ENSG00000173898 | -0.201569 | 5.800142 | 0.762449 | 1 SPTBN2        | K06115 |
| ENSG00000124596 | -0.204384 | 4.844005 | 0.76245  | 1 OARD1         | -      |
| ENSG00000116698 | 0.199561  | 6.64664  | 0.762499 | 1 SMG7          | K14409 |
| ENSG00000198954 | -0.199377 | 6.134185 | 0.762526 | 1 KIAA1279      | K10734 |
| ENSG00000125730 | 0.198785  | 7.271792 | 0.76256  | 1 C3            | K03990 |
| ENSG00000086061 | -0.197963 | 8.767964 | 0.762567 | 1 DNAJA1        | K09502 |
| ENSG00000125454 | -0.210323 | 4.48564  | 0.762568 | 1 SLC25A19      | K15108 |
| ENSG00000268006 | 0.20923   | 4.262919 | 0.762653 | 1 PTOV1-AS1     | -      |
| ENSG00000167528 | -0.207196 | 4.526123 | 0.762724 | 1 ZNF641        | K09228 |
| ENSG00000254004 | -0.204816 | 4.747802 | 0.762773 | 1 ZNF260        | K09228 |
| ENSG00000160214 | -0.20128  | 5.971232 | 0.762778 | 1 RRP1          | K14849 |
| ENSG00000111843 | -0.197833 | 8.39068  | 0.762897 | 1 TMEM14C       | -      |
| ENSG00000173267 | 0.198596  | 7.144785 | 0.762923 | 1 SNCG          | -      |
| ENSG00000084693 | 0.205171  | 5.128837 | 0.762935 | 1 AGBL5         | -      |
| ENSG00000164050 | 0.205387  | 4.811604 | 0.76302  | 1 PLXNB1        | K06821 |
| ENSG00000164713 | -0.200561 | 5.958606 | 0.76304  | 1 BRI3          | -      |
| ENSG00000157870 | 0.247035  | 2.590936 | 0.763054 | 1 FAM213B       | K15717 |
| ENSG00000180953 | 0.247035  | 2.590936 | 0.763054 | 1 ST20          | K02162 |
| ENSG00000184949 | 0.247035  | 2.590936 | 0.763054 | 1 FAM227A       | -      |
| ENSG00000135535 | 0.198014  | 7.679356 | 0.763076 | 1 CD164         | K06546 |
| ENSG00000270015 | -0.282008 | 1.550502 | 0.763086 | 1 RP11-540B6.6  | -      |
| ENSG00000143376 | 0.201489  | 5.325561 | 0.763114 | 1 SNX27         | K17936 |
| ENSG00000119231 | 0.199879  | 5.897338 | 0.76315  | 1 SENP5         | K08594 |



|                 |           |          |          |                     |        |
|-----------------|-----------|----------|----------|---------------------|--------|
| ENSG00000119383 | -0.198907 | 6.841738 | 0.76315  | 1 PPP2R4            | K17605 |
| ENSG00000129484 | -0.203535 | 5.349722 | 0.763194 | 1 PARP2             | K10798 |
| ENSG00000106609 | 0.198675  | 6.832204 | 0.76324  | 1 TMEM248           | -      |
| ENSG00000119326 | -0.197688 | 8.0774   | 0.763256 | 1 CTNNAL1           | -      |
| ENSG00000161638 | 0.197997  | 7.466281 | 0.763282 | 1 ITGA5             | K06484 |
| ENSG00000166925 | -0.201661 | 5.67108  | 0.763424 | 1 TSC22D4           | -      |
| ENSG00000155508 | 0.198369  | 6.948719 | 0.763432 | 1 CNOT8             | K12581 |
| ENSG00000175938 | 0.217629  | 3.383631 | 0.763482 | 1 ORAI3             | K16058 |
| ENSG00000137145 | 0.203709  | 5.436147 | 0.763489 | 1 DENND4C           | -      |
| ENSG00000075234 | -0.201067 | 5.43929  | 0.763489 | 1 TTC38             | -      |
| ENSG00000188706 | 0.201414  | 5.456284 | 0.763557 | 1 ZDHHC9            | K16675 |
| ENSG00000169570 | -0.228708 | 2.756766 | 0.763571 | 1 DTWD2             | -      |
| ENSG00000116525 | 0.227552  | 2.730161 | 0.763571 | 1 TRIM62            | K12030 |
| ENSG00000134780 | 0.213221  | 2.737183 | 0.763571 | 1 DAGLA             | K13806 |
| ENSG00000179715 | 0.213221  | 2.737183 | 0.763571 | 1 PCED1B            | -      |
| ENSG00000131019 | -0.458282 | 0.099778 | 0.763627 | 1 ULBP3             | K07986 |
| ENSG00000138378 | -0.458282 | 0.099778 | 0.763627 | 1 STAT4             | K11222 |
| ENSG00000197165 | -0.458282 | 0.099778 | 0.763627 | 1 SULT1A2           | K01014 |
| ENSG00000211454 | -0.458282 | 0.099778 | 0.763627 | 1 AKR7L             | K15303 |
| ENSG00000213236 | -0.458282 | 0.099778 | 0.763627 | 1 YWHAZP2           | K16197 |
| ENSG00000250041 | -0.458282 | 0.099778 | 0.763627 | 1 CTD-2003C8.2      | -      |
| ENSG00000255050 | -0.458282 | 0.099778 | 0.763627 | 1 RP11-661A12.9     | -      |
| ENSG00000269018 | -0.458282 | 0.099778 | 0.763627 | 1 AP001362.1        | K04613 |
| ENSG00000271153 | -0.458282 | 0.099778 | 0.763627 | 1 ABC7-4304130019.1 | K02893 |
| ENSG00000000460 | -0.208945 | 4.273168 | 0.763666 | 1 C1orf112          | K17542 |
| ENSG00000129696 | -0.218083 | 3.476914 | 0.763757 | 1 TTI2              | K10408 |
| ENSG00000184047 | -0.206299 | 3.963351 | 0.763798 | 1 DIABLO            | K10522 |
| ENSG00000059758 | -0.20266  | 5.262234 | 0.763887 | 1 CDK17             | K15595 |
| ENSG00000106012 | 0.201805  | 5.283354 | 0.763957 | 1 IQCE              | -      |
| ENSG00000180340 | -0.20176  | 5.483053 | 0.764063 | 1 FZD2              | K02235 |
| ENSG00000067900 | 0.197843  | 5.992791 | 0.764073 | 1 ROCK1             | K04514 |
| ENSG00000059728 | -0.206566 | 4.413422 | 0.764074 | 1 MXD1              | K09114 |
| ENSG00000131558 | -0.200351 | 5.778754 | 0.764117 | 1 EXOC4             | K06111 |
| ENSG00000197343 | -0.20209  | 5.504446 | 0.764121 | 1 ZNF655            | K09229 |
| ENSG00000135956 | 0.199212  | 5.793532 | 0.764164 | 1 TMEM127           | K15696 |
| ENSG00000188986 | -0.198203 | 6.719841 | 0.764168 | 1 NELFB             | K15180 |
| ENSG00000135090 | -0.207106 | 4.457972 | 0.764195 | 1 TAOK3             | K04429 |
| ENSG00000155085 | -0.247265 | 1.834161 | 0.764237 | 1 AK9               | K18533 |
| ENSG00000145386 | -0.197467 | 7.246171 | 0.764266 | 1 CCNA2             | K06627 |
| ENSG00000171222 | 0.202855  | 5.212906 | 0.764267 | 1 SCAND1            | -      |
| ENSG00000148700 | 0.198254  | 6.4558   | 0.764353 | 1 ADD3              | K18622 |
| ENSG00000146067 | -0.201801 | 4.822476 | 0.764408 | 1 FAM193B           | -      |
| ENSG00000157827 | -0.198907 | 5.907698 | 0.764464 | 1 FMNL2             | -      |
| ENSG00000036257 | 0.198124  | 6.051548 | 0.764527 | 1 CUL3              | K03869 |
| ENSG00000044090 | 0.199061  | 5.422908 | 0.764792 | 1 CUL7              | K10613 |
| ENSG00000160211 | 0.202799  | 4.721319 | 0.764872 | 1 G6PD              | K00036 |
| ENSG00000138594 | -0.196577 | 7.655523 | 0.764877 | 1 TMOD3             | K12581 |
| ENSG00000064313 | -0.199725 | 5.955081 | 0.764896 | 1 TAF2              | K03128 |
| ENSG00000164169 | -0.222145 | 3.214277 | 0.764898 | 1 PRMT10            | K19737 |
| ENSG00000125386 | 0.210752  | 3.901048 | 0.764905 | 1 FAM193A           | -      |
| ENSG00000068697 | 0.196166  | 8.129349 | 0.764914 | 1 LAPTM4A           | K12387 |
| ENSG00000172086 | -0.203425 | 5.036532 | 0.764925 | 1 KRCC1             | -      |
| ENSG00000181191 | 0.25397   | 2.07109  | 0.76498  | 1 PJA1              | K10633 |
| ENSG00000120519 | -0.243451 | 2.08249  | 0.76498  | 1 SLC10A7           | K14347 |
| ENSG00000213995 | 0.199134  | 5.863809 | 0.765015 | 1 CARKD             | K17757 |
| ENSG00000162852 | -0.200194 | 4.794321 | 0.765025 | 1 CNST              | K17581 |
| ENSG00000250462 | 0.208661  | 3.967102 | 0.765041 | 1 LRRC37BP1         | -      |
| ENSG00000178188 | 0.203948  | 4.82406  | 0.765097 | 1 SH2B1             | K05725 |

|                 |           |          |          |              |        |
|-----------------|-----------|----------|----------|--------------|--------|
| ENSG00000198715 | 0.200651  | 4.825621 | 0.765097 | 1 C1orf85    | -      |
| ENSG00000151693 | 0.208023  | 4.019464 | 0.765166 | 1 ASAP2      | K12488 |
| ENSG00000128191 | 0.199951  | 5.196245 | 0.765266 | 1 DGCR8      | K18419 |
| ENSG00000100360 | -0.214675 | 3.404182 | 0.765311 | 1 IFT27      | K07934 |
| ENSG00000162520 | -0.214675 | 3.404182 | 0.765311 | 1 SYNC       | K10377 |
| ENSG00000136270 | -0.196506 | 7.273053 | 0.765352 | 1 TBRG4      | -      |
| ENSG00000125977 | -0.195745 | 8.227194 | 0.765422 | 1 EIF2S2     | K03238 |
| ENSG00000166188 | -0.207949 | 3.488505 | 0.765481 | 1 ZNF319     | K09228 |
| ENSG00000235272 | 0.226011  | 2.266878 | 0.765497 | 1 FAM103A2P  | K18708 |
| ENSG00000122085 | -0.203485 | 4.696329 | 0.765543 | 1 MTERFD2    | K15032 |
| ENSG00000167378 | 0.202042  | 4.727963 | 0.765607 | 1 IRGQ       | -      |
| ENSG00000140650 | 0.203654  | 5.120031 | 0.765665 | 1 PMM2       | K17497 |
| ENSG00000158850 | -0.199797 | 5.494761 | 0.765805 | 1 B4GALT3    | K07968 |
| ENSG00000133114 | -0.199512 | 5.225224 | 0.765838 | 1 GPALPP1    | -      |
| ENSG00000112763 | -0.199947 | 5.250768 | 0.765877 | 1 BTN2A1     | K06712 |
| ENSG00000144674 | 0.196175  | 7.012996 | 0.765899 | 1 GOLGA4     | -      |
| ENSG00000140157 | -0.197605 | 6.034772 | 0.765953 | 1 NIPA2      | -      |
| ENSG00000155252 | 0.19777   | 5.591696 | 0.765963 | 1 PI4K2A     | K13711 |
| ENSG00000165724 | -0.198533 | 5.855681 | 0.765994 | 1 ZMYND19    | K17868 |
| ENSG00000116095 | -0.20628  | 4.508898 | 0.766023 | 1 PLEKHA3    | -      |
| ENSG00000100462 | -0.196683 | 6.629359 | 0.766093 | 1 PRMT5      | K02516 |
| ENSG00000092020 | -0.214323 | 3.917774 | 0.766188 | 1 PPP2R3C    | K11583 |
| ENSG00000173638 | -0.199805 | 5.596974 | 0.766366 | 1 SLC19A1    | K14609 |
| ENSG00000159322 | -0.199393 | 5.904775 | 0.76639  | 1 ADPGK      | K08074 |
| ENSG00000083520 | -0.196246 | 6.736792 | 0.766412 | 1 DIS3       | K12585 |
| ENSG00000180628 | -0.196729 | 6.209543 | 0.766468 | 1 PCGF5      | K11489 |
| ENSG00000203993 | 0.204533  | 4.138903 | 0.766484 | 1 C9orf37    | -      |
| ENSG00000133606 | 0.19527   | 7.431344 | 0.766488 | 1 MKRN1      | K15687 |
| ENSG00000164176 | -0.195934 | 6.910015 | 0.766499 | 1 EDIL3      | -      |
| ENSG00000100285 | 0.206025  | 4.290121 | 0.766653 | 1 NEFH       | K04574 |
| ENSG00000152117 | 0.206025  | 4.290121 | 0.766653 | 1 AC093838.4 | K12353 |
| ENSG00000147419 | -0.199516 | 5.519808 | 0.766688 | 1 CCDC25     | K14571 |
| ENSG00000109790 | -0.196944 | 6.186265 | 0.766705 | 1 KLHL5      | K10442 |
| ENSG00000144199 | -0.202075 | 5.076035 | 0.766724 | 1 FAHD2B     | -      |
| ENSG00000140382 | -0.198493 | 5.560301 | 0.766729 | 1 HMG20A     | -      |
| ENSG00000249353 | 0.194994  | 7.489169 | 0.766755 | 1 NPM1P27    | K11276 |
| ENSG00000120696 | 0.205505  | 4.510251 | 0.766871 | 1 KBTBD7     | K10474 |
| ENSG00000141452 | -0.202048 | 4.556207 | 0.766908 | 1 C18orf8    | -      |
| ENSG00000087191 | -0.195094 | 7.295547 | 0.766969 | 1 PSMC5      | K03066 |
| ENSG00000168818 | -0.204971 | 4.667313 | 0.767005 | 1 STX18      | K08492 |
| ENSG00000166439 | 0.201291  | 4.734576 | 0.767062 | 1 RNF169     | -      |
| ENSG00000117724 | 0.194221  | 8.195369 | 0.767142 | 1 CENPF      | K11499 |
| ENSG00000079387 | -0.196927 | 5.106869 | 0.767314 | 1 SENP1      | K08592 |
| ENSG00000173653 | -0.201881 | 5.211102 | 0.767374 | 1 RCE1       | K08658 |
| ENSG00000146463 | -0.196462 | 6.113457 | 0.767467 | 1 ZMYM4      | -      |
| ENSG00000162714 | -0.199635 | 5.39832  | 0.767473 | 1 ZNF496     | K09229 |
| ENSG00000114416 | 0.193905  | 8.195517 | 0.767511 | 1 FXR1       | K15516 |
| ENSG00000085871 | -0.203362 | 4.045239 | 0.767518 | 1 MGST2      | K00799 |
| ENSG00000147535 | -0.203362 | 4.045239 | 0.767518 | 1 PPAPDC1B   | -      |
| ENSG00000139531 | -0.207276 | 4.201124 | 0.767592 | 1 SUOX       | K00387 |
| ENSG00000012174 | -0.19552  | 6.535181 | 0.767621 | 1 MBTPS2     | K07765 |
| ENSG00000161010 | 0.2077    | 4.387688 | 0.767668 | 1 C5orf45    | -      |
| ENSG00000154743 | -0.198613 | 4.435815 | 0.767684 | 1 TSEN2      | K15322 |
| ENSG00000123908 | 0.199057  | 4.632111 | 0.767751 | 1 AGO2       | -      |
| ENSG00000121774 | -0.193812 | 8.042449 | 0.767794 | 1 KHDRBS1    | K13198 |
| ENSG00000141499 | -0.200379 | 4.938475 | 0.767835 | 1 WRAP53     | -      |
| ENSG00000121851 | -0.357324 | 0.801667 | 0.767877 | 1 POLR3GL    | K03024 |
| ENSG00000203813 | -0.357324 | 0.801667 | 0.767877 | 1 HIST1H3H   | K11253 |

|                 |           |          |          |                 |        |
|-----------------|-----------|----------|----------|-----------------|--------|
| ENSG00000272277 | -0.357324 | 0.801667 | 0.767877 | 1 RP1-40E16.12  | -      |
| ENSG00000103044 | 0.320565  | 0.750992 | 0.767877 | 1 HAS3          | K00752 |
| ENSG00000224687 | 0.320565  | 0.750992 | 0.767877 | 1 RASAL2-AS1    | -      |
| ENSG00000235016 | 0.320565  | 0.750992 | 0.767877 | 1 RP11-493K19.3 | -      |
| ENSG00000181751 | -0.306995 | 0.772389 | 0.767877 | 1 C5orf30       | -      |
| ENSG00000149658 | -0.195693 | 6.24464  | 0.768039 | 1 YTHDF1        | -      |
| ENSG00000133275 | -0.194876 | 6.683228 | 0.768096 | 1 CSNK1G2       | K08958 |
| ENSG00000126777 | 0.193494  | 7.989523 | 0.768114 | 1 KTN1          | K17975 |
| ENSG00000221978 | -0.195015 | 6.5614   | 0.768157 | 1 CCNL2         | -      |
| ENSG00000105137 | 0.194794  | 6.55809  | 0.768187 | 1 SYDE1         | -      |
| ENSG00000177963 | -0.19514  | 6.471925 | 0.768188 | 1 RIC8A         | -      |
| ENSG00000165732 | -0.193105 | 8.749074 | 0.768237 | 1 DDX21         | K16911 |
| ENSG00000137161 | 0.194851  | 6.020097 | 0.768314 | 1 CNPY3         | -      |
| ENSG00000188243 | -0.200195 | 5.290495 | 0.768403 | 1 COMMD6        | -      |
| ENSG00000162736 | 0.194569  | 6.568764 | 0.768429 | 1 NCSTN         | K06171 |
| ENSG00000132780 | -0.193144 | 8.223256 | 0.768457 | 1 NASP          | K11291 |
| ENSG00000180964 | -0.199958 | 4.814705 | 0.768486 | 1 TCEAL8        | -      |
| ENSG00000169905 | 0.194219  | 6.786792 | 0.768487 | 1 TOR1AIP2      | K17985 |
| ENSG00000139631 | -0.202053 | 4.642951 | 0.768523 | 1 CSAD          | K01594 |
| ENSG00000103111 | -0.20424  | 4.565502 | 0.768541 | 1 MON1B         | -      |
| ENSG00000158292 | 0.214426  | 3.65846  | 0.7688   | 1 GPR153        | K08437 |
| ENSG00000167105 | 0.214426  | 3.65846  | 0.7688   | 1 TMEM92        | -      |
| ENSG00000110108 | -0.193483 | 7.252813 | 0.768895 | 1 TMEM109       | -      |
| ENSG00000176142 | -0.198113 | 5.219354 | 0.768931 | 1 TMEM39A       | -      |
| ENSG00000204764 | -0.223853 | 2.916219 | 0.769086 | 1 RANBP17       | -      |
| ENSG00000044446 | -0.197572 | 5.705917 | 0.769088 | 1 PHKA2         | K07190 |
| ENSG00000151327 | -0.195553 | 5.633623 | 0.769135 | 1 FAM177A1      | -      |
| ENSG00000137872 | 0.220745  | 2.782276 | 0.769137 | 1 SEMA6D        | K06842 |
| ENSG00000102981 | -0.240373 | 1.59266  | 0.76926  | 1 PARD6A        | K06093 |
| ENSG00000135747 | 0.240854  | 2.293346 | 0.769296 | 1 ZNF670        | K09228 |
| ENSG00000231584 | 0.240854  | 2.293346 | 0.769296 | 1 FAHD2CP       | -      |
| ENSG00000213881 | 0.264382  | 1.857739 | 0.769341 | 1 NPM1P6        | K11276 |
| ENSG00000215068 | -0.237279 | 1.882184 | 0.769341 | 1 AC025171.1    | -      |
| ENSG00000166797 | -0.19385  | 6.64127  | 0.769364 | 1 FAM96A        | -      |
| ENSG00000039319 | -0.193527 | 5.761096 | 0.76941  | 1 ZFYVE16       | K04679 |
| ENSG00000152382 | -0.201714 | 4.489493 | 0.769414 | 1 TADA1         | K11317 |
| ENSG00000044115 | 0.191923  | 9.094584 | 0.769448 | 1 CTNNA1        | K05691 |
| ENSG00000132849 | 0.194296  | 6.012637 | 0.769512 | 1 INADL         | K06092 |
| ENSG00000168061 | -0.19533  | 5.955795 | 0.769567 | 1 SAC3D1        | K16734 |
| ENSG00000164023 | -0.195043 | 5.558443 | 0.769595 | 1 SGMS2         | -      |
| ENSG00000120896 | -0.195719 | 5.909162 | 0.769611 | 1 SORBS3        | -      |
| ENSG00000109065 | -0.19702  | 5.009564 | 0.769646 | 1 NAT9          | -      |
| ENSG00000147586 | -0.193818 | 6.152792 | 0.769661 | 1 MRPS28        | K17407 |
| ENSG00000174373 | -0.198706 | 4.164857 | 0.769711 | 1 RALGAPA1      | -      |
| ENSG00000105641 | -0.744868 | -0.94909 | 0.769726 | 1 SLC5A5        | K14385 |
| ENSG00000118557 | -0.744868 | -0.94909 | 0.769726 | 1 PMFBP1        | -      |
| ENSG00000137573 | -0.744868 | -0.94909 | 0.769726 | 1 SULF1         | K14607 |
| ENSG00000144452 | -0.744868 | -0.94909 | 0.769726 | 1 ABCA12        | K05646 |
| ENSG00000145002 | -0.744868 | -0.94909 | 0.769726 | 1 FAM86B2       | K12354 |
| ENSG00000155265 | -0.744868 | -0.94909 | 0.769726 | 1 GOLGA7B       | -      |
| ENSG00000164949 | -0.744868 | -0.94909 | 0.769726 | 1 GEM           | K07846 |
| ENSG00000165555 | -0.744868 | -0.94909 | 0.769726 | 1 NOXRED1       | -      |
| ENSG00000168743 | -0.744868 | -0.94909 | 0.769726 | 1 NPNT          | K06824 |
| ENSG00000171126 | -0.744868 | -0.94909 | 0.769726 | 1 KCNG3         | K04902 |
| ENSG00000175600 | -0.744868 | -0.94909 | 0.769726 | 1 SUGCT         | K18703 |
| ENSG00000178078 | -0.744868 | -0.94909 | 0.769726 | 1 STAP2         | K17985 |
| ENSG00000185634 | -0.744868 | -0.94909 | 0.769726 | 1 SHC4          | K17449 |
| ENSG00000199568 | -0.744868 | -0.94909 | 0.769726 | 1 RNU5A-1       | -      |

|                 |           |          |          |                  |        |
|-----------------|-----------|----------|----------|------------------|--------|
| ENSG00000213062 | -0.744868 | -0.94909 | 0.769726 | 1 AL021068.1     | -      |
| ENSG00000221843 | -0.744868 | -0.94909 | 0.769726 | 1 C2orf16        | -      |
| ENSG00000223756 | -0.744868 | -0.94909 | 0.769726 | 1 TSSC2          | K03842 |
| ENSG00000224959 | -0.744868 | -0.94909 | 0.769726 | 1 AC017002.2     | -      |
| ENSG00000226686 | -0.744868 | -0.94909 | 0.769726 | 1 AC012309.5     | -      |
| ENSG00000226706 | -0.744868 | -0.94909 | 0.769726 | 1 RP11-426A6.5   | -      |
| ENSG00000227653 | -0.744868 | -0.94909 | 0.769726 | 1 ISCA1P6        | K13628 |
| ENSG00000236209 | -0.744868 | -0.94909 | 0.769726 | 1 AC104135.2     | -      |
| ENSG00000236308 | -0.744868 | -0.94909 | 0.769726 | 1 RP11-316M21.7  | -      |
| ENSG00000238048 | -0.744868 | -0.94909 | 0.769726 | 1 AP005019.4     | -      |
| ENSG00000243742 | -0.744868 | -0.94909 | 0.769726 | 1 RPLP0P2        | K02941 |
| ENSG00000244119 | -0.744868 | -0.94909 | 0.769726 | 1 PDCL3P4        | -      |
| ENSG00000248278 | -0.744868 | -0.94909 | 0.769726 | 1 SUMO2P17       | K12160 |
| ENSG00000250404 | -0.744868 | -0.94909 | 0.769726 | 1 AC090587.2     | -      |
| ENSG00000252481 | -0.744868 | -0.94909 | 0.769726 | 1 SCARNA13       | -      |
| ENSG00000253878 | -0.744868 | -0.94909 | 0.769726 | 1 RP11-347C18.3  | -      |
| ENSG00000254331 | -0.744868 | -0.94909 | 0.769726 | 1 CKS1BP7        | K02219 |
| ENSG00000256196 | -0.744868 | -0.94909 | 0.769726 | 1 RP11-881M11.4  | -      |
| ENSG00000257052 | -0.744868 | -0.94909 | 0.769726 | 1 RP11-881M11.2  | -      |
| ENSG00000257410 | -0.744868 | -0.94909 | 0.769726 | 1 RP11-2H8.2     | -      |
| ENSG00000259086 | -0.744868 | -0.94909 | 0.769726 | 1 RP11-134E15.2  | -      |
| ENSG00000259918 | -0.744868 | -0.94909 | 0.769726 | 1 NDUFA5P11      | K03949 |
| ENSG00000263006 | -0.744868 | -0.94909 | 0.769726 | 1 ROCK1P1        | K04514 |
| ENSG00000265393 | -0.744868 | -0.94909 | 0.769726 | 1 CTD-2517M22.17 | -      |
| ENSG00000266446 | -0.744868 | -0.94909 | 0.769726 | 1 RP11-149I2.4   | -      |
| ENSG00000271828 | -0.744868 | -0.94909 | 0.769726 | 1 CTD-2310F14.1  | -      |
| ENSG00000271964 | -0.744868 | -0.94909 | 0.769726 | 1 RP11-415F23.2  | -      |
| ENSG00000272112 | -0.744868 | -0.94909 | 0.769726 | 1 CTB-113P19.5   | -      |
| ENSG00000272129 | -0.744868 | -0.94909 | 0.769726 | 1 RP11-250B2.6   | -      |
| ENSG00000273366 | -0.744868 | -0.94909 | 0.769726 | 1 CTA-989H11.1   | -      |
| ENSG00000273488 | -0.744868 | -0.94909 | 0.769726 | 1 RP11-114I8.4   | -      |
| ENSG00000122692 | -0.193122 | 6.890955 | 0.769799 | 1 SMU1           | K13111 |
| ENSG00000149150 | 0.200214  | 4.684252 | 0.770006 | 1 SLC43A1        | K08228 |
| ENSG00000087448 | -0.196033 | 5.641545 | 0.770292 | 1 KLHL42         | -      |
| ENSG00000165233 | 0.201329  | 4.406481 | 0.770385 | 1 C9orf89        | -      |
| ENSG00000088899 | -0.203811 | 3.601093 | 0.770392 | 1 LZTS3          | -      |
| ENSG00000163930 | -0.193434 | 5.976127 | 0.770469 | 1 BAP1           | K08588 |
| ENSG00000169689 | 0.193065  | 6.390311 | 0.770506 | 1 STRA13         | K15360 |
| ENSG00000116871 | 0.192025  | 7.16539  | 0.770546 | 1 MAP7D1         | K16806 |
| ENSG00000197226 | 0.19228   | 6.876935 | 0.770614 | 1 TBC1D9B        | -      |
| ENSG00000100629 | -0.208856 | 3.436831 | 0.770634 | 1 CEP128         | K16460 |
| ENSG00000149657 | -0.195947 | 5.128324 | 0.770635 | 1 LSM14B         | K18749 |
| ENSG00000164983 | -0.193267 | 5.869245 | 0.770645 | 1 TMEM65         | K04257 |
| ENSG00000198938 | -0.190543 | 12.20716 | 0.770682 | 1 MT-CO3         | K02262 |
| ENSG00000165322 | -0.194667 | 5.606001 | 0.770741 | 1 ARHGAP12       | -      |
| ENSG00000154556 | 0.192278  | 6.285605 | 0.770771 | 1 SORBS2         | -      |
| ENSG00000090889 | -0.192823 | 6.498345 | 0.770829 | 1 KIF4A          | K10395 |
| ENSG00000124181 | 0.192958  | 5.716314 | 0.770916 | 1 PLCG1          | K01116 |
| ENSG00000110429 | 0.195689  | 5.256053 | 0.770929 | 1 FBXO3          | K10290 |
| ENSG00000171492 | -0.192469 | 6.644344 | 0.770965 | 1 LRRC8D         | -      |
| ENSG00000157881 | 0.198939  | 4.895128 | 0.771055 | 1 PANK4          | K09680 |
| ENSG00000228929 | 0.209741  | 3.146792 | 0.771114 | 1 RP11-159C21.4  | K02953 |
| ENSG00000100403 | -0.194267 | 6.336429 | 0.771162 | 1 ZC3H7B         | K18047 |
| ENSG00000114650 | 0.193102  | 6.212909 | 0.771163 | 1 SCAP           | -      |
| ENSG00000070814 | -0.190946 | 7.775791 | 0.771336 | 1 TCOF1          | K14562 |
| ENSG00000198467 | 0.190286  | 9.07167  | 0.771367 | 1 TPM2           | K10374 |
| ENSG00000186187 | -0.200604 | 4.373768 | 0.771371 | 1 ZNRF1          | K10694 |
| ENSG00000136048 | -0.191239 | 7.336535 | 0.771414 | 1 DRAM1          | -      |

|                 |           |          |          |                 |        |
|-----------------|-----------|----------|----------|-----------------|--------|
| ENSG00000134108 | 0.191932  | 6.096491 | 0.771416 | 1 ARL8B         | K07955 |
| ENSG00000126705 | 0.197381  | 4.961439 | 0.771548 | 1 AHDC1         | -      |
| ENSG00000188064 | 0.193972  | 5.73786  | 0.771598 | 1 WNT7B         | K00572 |
| ENSG00000177189 | -0.191794 | 6.712781 | 0.771631 | 1 RPS6KA3       | K04373 |
| ENSG00000197024 | -0.194537 | 4.62349  | 0.771648 | 1 ZNF398        | K09228 |
| ENSG00000137944 | -0.193031 | 5.512148 | 0.771759 | 1 CCBL2         | K00816 |
| ENSG00000115993 | 0.195142  | 5.104822 | 0.771787 | 1 TRAK2         | K15374 |
| ENSG00000186812 | -0.219113 | 2.807509 | 0.771823 | 1 ZNF397        | K09230 |
| ENSG00000112531 | -0.192887 | 5.926561 | 0.772141 | 1 QKI           | K14945 |
| ENSG00000100201 | 0.189646  | 8.674705 | 0.772254 | 1 DDX17         | K13178 |
| ENSG00000197386 | 0.193491  | 5.614272 | 0.772301 | 1 HTT           | K04533 |
| ENSG00000099899 | -0.193362 | 5.710949 | 0.77241  | 1 TRMT2A        | K15332 |
| ENSG00000158604 | 0.190446  | 7.066349 | 0.772504 | 1 TMED4         | -      |
| ENSG00000109814 | 0.192511  | 5.796686 | 0.772507 | 1 UGDH          | K00012 |
| ENSG00000179922 | 0.21405   | 2.494278 | 0.772519 | 1 ZNF784        | -      |
| ENSG00000154370 | 0.192733  | 5.881033 | 0.772593 | 1 TRIM11        | K10650 |
| ENSG00000126214 | 0.19429   | 4.7379   | 0.772819 | 1 KLC1          | K10407 |
| ENSG00000117305 | 0.200041  | 4.178262 | 0.772851 | 1 HMGCL         | K01640 |
| ENSG00000051620 | -0.194965 | 4.706397 | 0.772932 | 1 HEBP2         | -      |
| ENSG00000188060 | -0.196165 | 4.911052 | 0.772955 | 1 RAB42         | K07929 |
| ENSG00000135476 | 0.190851  | 6.299042 | 0.772957 | 1 ESPL1         | K02365 |
| ENSG00000114520 | -0.193609 | 5.819678 | 0.77313  | 1 SNX4          | K17919 |
| ENSG00000160072 | -0.193539 | 5.344332 | 0.773146 | 1 ATAD3B        | K17681 |
| ENSG00000012232 | 0.193554  | 5.579813 | 0.773204 | 1 EXTL3         | -      |
| ENSG00000072736 | 0.200944  | 4.334344 | 0.773343 | 1 NFATC3        | K17333 |
| ENSG00000147164 | 0.19277   | 5.852449 | 0.773348 | 1 SNX12         | K17918 |
| ENSG00000108100 | 0.190557  | 6.009226 | 0.773419 | 1 CCNY          | -      |
| ENSG00000197747 | 0.188785  | 8.322541 | 0.773421 | 1 S100A10       | K17274 |
| ENSG00000087299 | -0.208046 | 3.619107 | 0.773461 | 1 L2HGDH        | K00109 |
| ENSG00000136451 | -0.19079  | 6.068475 | 0.7735   | 1 VEZF1         | -      |
| ENSG00000144182 | -0.254244 | 2.133891 | 0.773533 | 1 LIPT1         | K10105 |
| ENSG00000231025 | -0.254244 | 2.133891 | 0.773533 | 1 RP11-175O19.4 | -      |
| ENSG00000260868 | -0.254244 | 2.133891 | 0.773533 | 1 RP11-394I13.1 | -      |
| ENSG00000140398 | 0.247728  | 2.112445 | 0.773533 | 1 NEIL1         | K10567 |
| ENSG00000189223 | 0.247728  | 2.112445 | 0.773533 | 1 PAX8-AS1      | -      |
| ENSG00000170915 | 0.225418  | 2.123499 | 0.773533 | 1 PAQR8         | -      |
| ENSG00000187775 | 0.225418  | 2.123499 | 0.773533 | 1 DNAH17        | K10408 |
| ENSG00000182318 | 0.211078  | 3.049455 | 0.773552 | 1 ZSCAN22       | K09230 |
| ENSG00000226950 | 0.197312  | 4.514147 | 0.773592 | 1 DANCR         | -      |
| ENSG00000046651 | -0.192624 | 5.662461 | 0.773696 | 1 OFD1          | K16480 |
| ENSG00000103540 | -0.191785 | 4.883096 | 0.773698 | 1 CCP110        | K16453 |
| ENSG00000134308 | 0.188315  | 8.924134 | 0.773719 | 1 YWHAQ         | K16197 |
| ENSG00000108106 | 0.18844   | 8.516127 | 0.773731 | 1 UBE2S         | K10583 |
| ENSG00000108960 | -0.195094 | 5.037847 | 0.773734 | 1 MMD           | -      |
| ENSG00000134057 | -0.188492 | 8.424412 | 0.773776 | 1 CCNB1         | K05868 |
| ENSG00000236698 | -0.194997 | 5.149464 | 0.773864 | 1 EIF1AXP1      | K03236 |
| ENSG00000080345 | -0.19027  | 6.465013 | 0.773866 | 1 RIF1          | K11138 |
| ENSG00000131368 | -0.191032 | 6.099479 | 0.773951 | 1 MRPS25        | K17404 |
| ENSG00000124275 | -0.189041 | 7.340066 | 0.773975 | 1 MTRR          | K00597 |
| ENSG00000122642 | -0.190093 | 6.503192 | 0.773995 | 1 FKBP9         | K09575 |
| ENSG00000118412 | 0.192835  | 4.781647 | 0.774081 | 1 CASP8AP2      | -      |
| ENSG00000137486 | 0.199711  | 4.383545 | 0.774084 | 1 ARRB1         | K04439 |
| ENSG00000120159 | -0.193121 | 5.306078 | 0.774264 | 1 CAAP1         | -      |
| ENSG00000177084 | 0.189041  | 6.935472 | 0.774309 | 1 POLE          | K02324 |
| ENSG00000151725 | -0.191164 | 6.074338 | 0.774342 | 1 CENPU         | K11513 |
| ENSG00000176399 | 0.210617  | 3.371098 | 0.7744   | 1 DMRTA1        | K19491 |
| ENSG00000198930 | -0.192662 | 5.376331 | 0.774435 | 1 CSAG1         | -      |
| ENSG00000107959 | -0.190674 | 5.828191 | 0.774464 | 1 PITRM1        | K06972 |

|                 |           |          |          |             |        |
|-----------------|-----------|----------|----------|-------------|--------|
| ENSG00000175426 | -0.20019  | 4.031872 | 0.774538 | 1 PCSK1     | K01359 |
| ENSG00000107521 | -0.199384 | 4.479691 | 0.774587 | 1 HPS1      | -      |
| ENSG00000113716 | 0.189156  | 6.261196 | 0.774601 | 1 HMGXB3    | -      |
| ENSG00000141570 | -0.192133 | 4.823988 | 0.774611 | 1 CBX8      | K11455 |
| ENSG00000123388 | -0.200261 | 3.705531 | 0.77464  | 1 HOXC11    | K09296 |
| ENSG00000065613 | -0.18865  | 7.155998 | 0.774647 | 1 SLK       | K08836 |
| ENSG00000169972 | 0.195526  | 4.786416 | 0.77476  | 1 PUSL1     | -      |
| ENSG00000112984 | 0.188625  | 6.960005 | 0.774762 | 1 KIF20A    | K10402 |
| ENSG00000100150 | 0.204242  | 3.274794 | 0.774791 | 1 DEPDC5    | -      |
| ENSG00000140104 | 0.204242  | 3.274794 | 0.774791 | 1 C14orf79  | -      |
| ENSG00000158882 | -0.204372 | 3.974525 | 0.774793 | 1 TOMM40L   | K11518 |
| ENSG00000114120 | -0.188415 | 7.169151 | 0.774905 | 1 SLC25A36  | K15116 |
| ENSG00000180008 | 0.190542  | 5.942988 | 0.774922 | 1 SOCS4     | K04697 |
| ENSG00000135063 | 0.278912  | 1.607319 | 0.775122 | 1 FAM189A2  | -      |
| ENSG00000186564 | 0.278912  | 1.607319 | 0.775122 | 1 FOXD2     | K09397 |
| ENSG00000225439 | 0.278912  | 1.607319 | 0.775122 | 1 BOLA3-AS1 | -      |
| ENSG00000196357 | 0.246612  | 1.623381 | 0.775122 | 1 ZNF565    | K09228 |
| ENSG00000165502 | 0.188052  | 7.044891 | 0.775324 | 1 RPL36AL   | K02929 |
| ENSG00000182173 | -0.189616 | 5.472235 | 0.775344 | 1 TSEN54    | K15326 |
| ENSG00000167460 | -0.186725 | 9.102814 | 0.775562 | 1 TPM4      | K10375 |
| ENSG00000075975 | 0.190824  | 5.2364   | 0.77557  | 1 MKRN2     | K15687 |
| ENSG00000105204 | 0.226907  | 2.516985 | 0.775704 | 1 DYRK1B    | K08825 |
| ENSG00000138002 | -0.20635  | 3.075158 | 0.775744 | 1 IFT172    | K19676 |
| ENSG00000173221 | 0.189875  | 5.28899  | 0.775806 | 1 GLRX      | K03676 |
| ENSG00000117410 | 0.187296  | 7.332096 | 0.775886 | 1 ATP6V0B   | K03661 |
| ENSG00000107164 | -0.188633 | 6.404752 | 0.775896 | 1 FUBP3     | K13210 |
| ENSG00000100852 | 0.188409  | 6.384529 | 0.775938 | 1 ARHGAP5   | K13709 |
| ENSG00000173085 | -0.19032  | 5.162973 | 0.775967 | 1 COQ2      | K06125 |
| ENSG00000122140 | -0.187992 | 6.767713 | 0.77597  | 1 MRPS2     | K02967 |
| ENSG00000145782 | 0.187598  | 6.319513 | 0.776044 | 1 ATG12     | K08336 |
| ENSG00000143033 | -0.187612 | 6.309078 | 0.776108 | 1 MTF2      | K11485 |
| ENSG00000104643 | -0.217688 | 3.387578 | 0.77617  | 1 MTMR9     | K18084 |
| ENSG00000139433 | -0.193223 | 4.653393 | 0.776171 | 1 GLTP      | K12581 |
| ENSG00000140943 | -0.187864 | 6.726929 | 0.776187 | 1 MBTPS1    | K08653 |
| ENSG00000103222 | 0.187672  | 5.87206  | 0.776254 | 1 ABCC1     | K05665 |
| ENSG00000179335 | 0.188051  | 6.427998 | 0.776272 | 1 CLK3      | K08823 |
| ENSG00000133687 | 0.190833  | 5.498647 | 0.776484 | 1 TMTC1     | -      |
| ENSG00000170734 | 0.196765  | 4.44732  | 0.776485 | 1 POLH      | K03509 |
| ENSG00000198039 | -0.226943 | 2.363576 | 0.776539 | 1 ZNF273    | K09228 |
| ENSG00000166167 | 0.190257  | 5.052887 | 0.776567 | 1 BTRC      | K03362 |
| ENSG00000087884 | 0.195637  | 4.260744 | 0.77662  | 1 AAMDC     | K09228 |
| ENSG00000169398 | 0.186407  | 7.641105 | 0.776644 | 1 PTK2      | K05725 |
| ENSG00000040487 | -0.200452 | 3.858408 | 0.776648 | 1 PQLC2     | -      |
| ENSG00000023330 | 0.187595  | 6.509269 | 0.776655 | 1 ALAS1     | K00643 |
| ENSG00000175467 | 0.187342  | 6.211118 | 0.776659 | 1 SART1     | K11984 |
| ENSG00000075711 | 0.188653  | 5.891417 | 0.776796 | 1 DLG1      | K12076 |
| ENSG00000150093 | 0.185458  | 9.979429 | 0.776812 | 1 ITGB1     | K05719 |
| ENSG00000169174 | -0.186176 | 7.808435 | 0.776882 | 1 PCSK9     | K13050 |
| ENSG00000107362 | 0.189411  | 5.702047 | 0.776892 | 1 ABHD17B   | K12581 |
| ENSG00000134313 | -0.195226 | 4.215245 | 0.776909 | 1 KIDINS220 | K12460 |
| ENSG00000120688 | -0.189889 | 5.086365 | 0.776957 | 1 WBP4      | K13220 |
| ENSG00000128185 | -0.191807 | 5.169078 | 0.777004 | 1 DGCR6L    | K06262 |
| ENSG00000137478 | -0.205212 | 3.793572 | 0.777032 | 1 FCHSD2    | -      |
| ENSG00000147813 | -0.186037 | 7.595901 | 0.777226 | 1 NAPRT1    | K00763 |
| ENSG00000100196 | 0.188242  | 5.647048 | 0.777228 | 1 KDELR3    | K10949 |
| ENSG00000100139 | -0.187334 | 5.629208 | 0.777345 | 1 MICALL1   | -      |
| ENSG00000101115 | -0.200613 | 3.484469 | 0.777371 | 1 SALL4     | -      |
| ENSG00000164048 | -0.200613 | 3.484469 | 0.777371 | 1 ZNF589    | K09228 |

|                 |           |          |          |                 |        |
|-----------------|-----------|----------|----------|-----------------|--------|
| ENSG00000173451 | -0.200613 | 3.484469 | 0.777371 | 1 THAP2         | -      |
| ENSG00000175826 | -0.186477 | 7.000095 | 0.777389 | 1 CTDNEP1       | K17617 |
| ENSG00000111445 | -0.187895 | 5.796222 | 0.777394 | 1 RFC5          | K10756 |
| ENSG00000186106 | -0.192925 | 4.69797  | 0.777407 | 1 ANKRD46       | -      |
| ENSG00000104442 | -0.186539 | 6.32993  | 0.777441 | 1 ARMC1         | K17306 |
| ENSG00000167302 | 0.200684  | 3.716556 | 0.777453 | 1 ENTHD2        | -      |
| ENSG00000260267 | -0.245952 | 2.173042 | 0.777582 | 1 RP11-452L6.5  | -      |
| ENSG00000108785 | 0.241839  | 2.15264  | 0.777582 | 1 HSD17B1P1     | K00044 |
| ENSG00000227540 | 0.241839  | 2.15264  | 0.777582 | 1 RP11-152N13.5 | -      |
| ENSG00000249279 | 0.358578  | 0.823559 | 0.77773  | 1 CTC-436P18.3  | -      |
| ENSG00000260442 | 0.358578  | 0.823559 | 0.77773  | 1 RP11-22P6.3   | -      |
| ENSG00000263320 | 0.358578  | 0.823559 | 0.77773  | 1 RP11-498D10.6 | -      |
| ENSG00000178199 | 0.300086  | 0.852261 | 0.77773  | 1 ZC3H12D       | K18668 |
| ENSG00000214192 | 0.300086  | 0.852261 | 0.77773  | 1 UBE2V1P2      | K10704 |
| ENSG00000255517 | 0.300086  | 0.852261 | 0.77773  | 1 CTD-3074O7.5  | -      |
| ENSG00000224858 | -0.281314 | 0.870644 | 0.77773  | 1 RPL29P11      | K02905 |
| ENSG00000267801 | -0.281314 | 0.870644 | 0.77773  | 1 RP11-552F3.9  | -      |
| ENSG00000185340 | -0.189871 | 5.899661 | 0.777733 | 1 GAS2L1        | -      |
| ENSG00000143013 | -0.185763 | 7.398124 | 0.777741 | 1 LMO4          | -      |
| ENSG00000257698 | -0.226353 | 2.697061 | 0.777827 | 1 RP11-620J15.3 | -      |
| ENSG00000188021 | -0.186949 | 5.781959 | 0.77784  | 1 UBQLN2        | K04523 |
| ENSG00000143702 | -0.190679 | 5.727586 | 0.777842 | 1 CEP170        | K16463 |
| ENSG00000101003 | -0.192014 | 4.843961 | 0.777874 | 1 GINS1         | K10732 |
| ENSG00000157212 | -0.192646 | 4.741211 | 0.777879 | 1 PAXIP1        | K14972 |
| ENSG00000184307 | -0.195505 | 4.503047 | 0.777889 | 1 ZDHHC23       | K18932 |
| ENSG00000204272 | -0.190248 | 5.468281 | 0.777799 | 1 RP11-622K12.1 | -      |
| ENSG00000178951 | 0.188051  | 5.327759 | 0.778009 | 1 ZBTB7A        | K10494 |
| ENSG00000113448 | -0.185503 | 7.352201 | 0.778094 | 1 PDE4D         | K13293 |
| ENSG00000140905 | -0.189014 | 4.881601 | 0.778291 | 1 GCSH          | K02437 |
| ENSG00000160014 | 0.18526   | 7.281354 | 0.778317 | 1 CALM3         | K02183 |
| ENSG00000197785 | -0.186901 | 5.802517 | 0.778394 | 1 ATAD3A        | K17681 |
| ENSG00000127022 | 0.183922  | 10.08345 | 0.778596 | 1 CANX          | K08054 |
| ENSG00000197355 | 0.192302  | 4.628601 | 0.778629 | 1 UAP1L1        | K00972 |
| ENSG00000122674 | -0.18854  | 5.010903 | 0.778634 | 1 CCZ1          | -      |
| ENSG00000148908 | 0.189594  | 5.491835 | 0.778672 | 1 RGS10         | K16449 |
| ENSG00000162542 | -0.199566 | 3.9349   | 0.778709 | 1 TMCO4         | -      |
| ENSG00000101557 | -0.185102 | 7.090006 | 0.778875 | 1 USP14         | K11843 |
| ENSG00000204178 | -0.193682 | 4.224639 | 0.778884 | 1 TMEM57        | -      |
| ENSG00000162148 | -0.397642 | 0.252986 | 0.779001 | 1 PPP1R32       | K17571 |
| ENSG00000163113 | -0.397642 | 0.252986 | 0.779001 | 1 OTUD7B        | K11860 |
| ENSG00000176809 | -0.397642 | 0.252986 | 0.779001 | 1 LRRC37A3      | -      |
| ENSG00000177842 | -0.397642 | 0.252986 | 0.779001 | 1 ZNF620        | K09228 |
| ENSG00000235034 | -0.397642 | 0.252986 | 0.779001 | 1 C19orf81      | -      |
| ENSG00000256028 | -0.397642 | 0.252986 | 0.779001 | 1 RP11-197N18.2 | -      |
| ENSG00000124140 | 0.397277  | 0.146629 | 0.779001 | 1 SLC12A5       | K14427 |
| ENSG00000150540 | 0.397277  | 0.146629 | 0.779001 | 1 HNMT          | K00546 |
| ENSG00000196873 | 0.397277  | 0.146629 | 0.779001 | 1 CBWD3         | K17985 |
| ENSG00000212789 | 0.397277  | 0.146629 | 0.779001 | 1 ST13P5        | K09560 |
| ENSG00000217275 | 0.397277  | 0.146629 | 0.779001 | 1 RP1-34B20.4   | K02947 |
| ENSG00000228395 | 0.397277  | 0.146629 | 0.779001 | 1 RP11-216B9.6  | -      |
| ENSG00000231305 | 0.397277  | 0.146629 | 0.779001 | 1 RP11-723O4.2  | -      |
| ENSG00000232110 | 0.397277  | 0.146629 | 0.779001 | 1 RP11-149I23.3 | -      |
| ENSG00000251867 | 0.397277  | 0.146629 | 0.779001 | 1 Y_RNA         | -      |
| ENSG00000266490 | 0.397277  | 0.146629 | 0.779001 | 1 CTD-2349P21.9 | -      |
| ENSG00000272374 | 0.397277  | 0.146629 | 0.779001 | 1 RP3-329A5.8   | -      |
| ENSG00000101162 | -0.320343 | 0.208735 | 0.779001 | 1 TUBB1         | K07375 |
| ENSG00000232818 | -0.320343 | 0.208735 | 0.779001 | 1 RPS2P32       | K02981 |
| ENSG00000250838 | -0.320343 | 0.208735 | 0.779001 | 1 RP11-501C14.5 | -      |

|                 |           |          |          |                 |        |
|-----------------|-----------|----------|----------|-----------------|--------|
| ENSG00000258920 | -0.320343 | 0.208735 | 0.779001 | 1 FOXN3-AS1     | -      |
| ENSG00000267216 | -0.320343 | 0.208735 | 0.779001 | 1 AC010642.1    | K09228 |
| ENSG00000269940 | -0.320343 | 0.208735 | 0.779001 | 1 RP11-73M18.7  | -      |
| ENSG00000139998 | 0.298884  | 0.19372  | 0.779001 | 1 RAB15         | K07908 |
| ENSG00000156265 | 0.298884  | 0.19372  | 0.779001 | 1 MAP3K7CL      | -      |
| ENSG00000185900 | 0.298884  | 0.19372  | 0.779001 | 1 POMK          | K17547 |
| ENSG00000214432 | 0.298884  | 0.19372  | 0.779001 | 1 AC068831.10   | -      |
| ENSG00000226824 | 0.298884  | 0.19372  | 0.779001 | 1 RP4-756H11.3  | -      |
| ENSG00000228705 | 0.298884  | 0.19372  | 0.779001 | 1 LINC00659     | -      |
| ENSG00000231007 | 0.298884  | 0.19372  | 0.779001 | 1 CDC20P1       | K03363 |
| ENSG00000231789 | 0.298884  | 0.19372  | 0.779001 | 1 RP11-558F24.4 | -      |
| ENSG00000244161 | 0.298884  | 0.19372  | 0.779001 | 1 FLNB-AS1      | -      |
| ENSG00000250506 | 0.298884  | 0.19372  | 0.779001 | 1 CDK3          | K02088 |
| ENSG00000260461 | 0.298884  | 0.19372  | 0.779001 | 1 RP11-541N10.3 | -      |
| ENSG00000270820 | 0.298884  | 0.19372  | 0.779001 | 1 RP11-355B11.2 | -      |
| ENSG00000164961 | -0.18634  | 6.063251 | 0.779037 | 1 KIAA0196      | K18464 |
| ENSG00000108518 | -0.183584 | 9.681656 | 0.779087 | 1 PFN1          | K05759 |
| ENSG00000164109 | -0.185052 | 6.941772 | 0.779136 | 1 MAD2L1        | K02537 |
| ENSG00000171295 | 0.202876  | 3.205182 | 0.779213 | 1 ZNF440        | K09228 |
| ENSG00000144791 | 0.189777  | 5.154971 | 0.779245 | 1 LIMD1         | K16682 |
| ENSG00000122779 | -0.186366 | 5.825881 | 0.779257 | 1 TRIM24        | K08881 |
| ENSG00000168615 | 0.184118  | 7.706017 | 0.77927  | 1 ADAM9         | K06834 |
| ENSG00000126709 | -0.18887  | 4.919742 | 0.779297 | 1 IFI6          | -      |
| ENSG00000136436 | -0.185903 | 6.305763 | 0.779314 | 1 CALCOCO2      | -      |
| ENSG00000120742 | -0.183839 | 7.962197 | 0.779502 | 1 SERP1         | -      |
| ENSG00000163444 | -0.185556 | 6.307978 | 0.779548 | 1 TMEM183A      | -      |
| ENSG00000179611 | 0.206617  | 3.404701 | 0.779629 | 1 DGKZP1        | K00901 |
| ENSG00000174839 | -0.200737 | 4.122731 | 0.779664 | 1 DENND6A       | -      |
| ENSG00000103253 | -0.18658  | 5.721789 | 0.779718 | 1 HAGHL         | K01069 |
| ENSG00000134001 | -0.183759 | 7.778027 | 0.779735 | 1 EIF2S1        | K03237 |
| ENSG00000196504 | -0.183956 | 7.512938 | 0.779739 | 1 PRPF40A       | K12821 |
| ENSG00000082258 | -0.190056 | 4.85611  | 0.779788 | 1 CCNT2         | K15188 |
| ENSG00000181555 | 0.188272  | 5.663596 | 0.779794 | 1 SETD2         | K11423 |
| ENSG00000143162 | -0.184884 | 6.619185 | 0.779853 | 1 CREG1         | -      |
| ENSG00000158985 | 0.185133  | 6.022106 | 0.779928 | 1 CDC42SE2      | -      |
| ENSG00000005100 | -0.184889 | 5.864752 | 0.779963 | 1 DHX33         | K17820 |
| ENSG00000255284 | 0.231051  | 2.363498 | 0.779995 | 1 AP006621.5    | -      |
| ENSG00000179163 | 0.206081  | 3.091346 | 0.780003 | 1 FUCA1         | K01206 |
| ENSG00000075399 | 0.19504   | 3.096741 | 0.780003 | 1 VPS9D1        | -      |
| ENSG00000156504 | 0.184459  | 6.665302 | 0.780052 | 1 FAM122B       | -      |
| ENSG00000134508 | 0.187321  | 5.722141 | 0.780067 | 1 CABLES1       | -      |
| ENSG00000130429 | -0.183511 | 7.674803 | 0.780112 | 1 ARPC1B        | K05757 |
| ENSG00000102893 | -0.187028 | 5.525528 | 0.780131 | 1 PHKB          | K17985 |
| ENSG00000196141 | -0.189223 | 5.244989 | 0.780141 | 1 SPATS2L       | -      |
| ENSG00000130159 | 0.185123  | 5.607982 | 0.780254 | 1 ECSIT         | K04405 |
| ENSG00000131446 | -0.18469  | 6.512839 | 0.780276 | 1 MGAT1         | K00726 |
| ENSG00000162616 | -0.184234 | 6.801903 | 0.780303 | 1 DNAJB4        | K09510 |
| ENSG00000123595 | 0.183568  | 7.25285  | 0.780327 | 1 RAB9A         | K07899 |
| ENSG00000148606 | -0.188594 | 5.219341 | 0.780347 | 1 POLR3A        | K03018 |
| ENSG00000184545 | 0.195837  | 3.874549 | 0.780399 | 1 DUSP8         | K04459 |
| ENSG00000182612 | -0.208724 | 2.716693 | 0.780565 | 1 TSPAN10       | K17351 |
| ENSG00000142409 | 0.187312  | 5.568756 | 0.78058  | 1 ZNF787        | K09228 |
| ENSG00000144306 | 0.195665  | 3.50104  | 0.780595 | 1 SCRN3         | K14358 |
| ENSG00000173039 | 0.183617  | 6.114956 | 0.7806   | 1 RELA          | K04735 |
| ENSG00000153531 | -0.282103 | 1.679802 | 0.780694 | 1 ADPRHL1       | -      |
| ENSG00000172671 | -0.255712 | 1.664619 | 0.780694 | 1 ZFAND4        | K12163 |
| ENSG00000148824 | -0.194378 | 4.130198 | 0.780706 | 1 MTG1          | -      |
| ENSG00000112029 | -0.185738 | 5.593354 | 0.780795 | 1 FBXO5         | K10292 |



|                 |           |          |          |                 |        |
|-----------------|-----------|----------|----------|-----------------|--------|
| ENSG00000104889 | -0.183323 | 7.201686 | 0.780816 | 1 RNASEH2A      | K10743 |
| ENSG00000196586 | -0.18566  | 5.222861 | 0.780838 | 1 MYO6          | K10358 |
| ENSG00000136848 | 0.186272  | 5.485971 | 0.780883 | 1 DAB2IP        | K17631 |
| ENSG00000166130 | -0.183162 | 7.292811 | 0.780898 | 1 IKBIP         | K17985 |
| ENSG00000130675 | 0.21916   | 2.984236 | 0.780915 | 1 MNX1          | K08025 |
| ENSG00000130772 | 0.207204  | 2.990069 | 0.780915 | 1 MED18         | K15135 |
| ENSG00000170265 | 0.187616  | 5.529384 | 0.780925 | 1 ZNF282        | K09228 |
| ENSG00000168994 | -0.18474  | 6.030782 | 0.781053 | 1 PXDC1         | -      |
| ENSG00000148337 | -0.183777 | 6.620526 | 0.781142 | 1 CIZ1          | -      |
| ENSG00000143198 | 0.182662  | 7.424655 | 0.781215 | 1 MGST3         | K00799 |
| ENSG00000241127 | -0.191808 | 4.293288 | 0.781342 | 1 YAE1D1        | -      |
| ENSG00000204138 | -0.188941 | 4.900798 | 0.78138  | 1 PHACTR4       | K17585 |
| ENSG00000101347 | -0.205858 | 3.751894 | 0.781543 | 1 SAMHD1        | K17985 |
| ENSG00000175573 | -0.190285 | 4.999993 | 0.781725 | 1 C11orf68      | -      |
| ENSG00000142694 | 0.195015  | 4.134002 | 0.781739 | 1 EVA1B         | -      |
| ENSG00000228305 | -0.192746 | 4.140159 | 0.781739 | 1 AC016734.2    | -      |
| ENSG00000156709 | -0.182453 | 7.271702 | 0.781751 | 1 AIFM1         | K04727 |
| ENSG00000154265 | -0.185731 | 5.176358 | 0.781794 | 1 ABCA5         | K05648 |
| ENSG00000179588 | 0.20369   | 3.111841 | 0.782074 | 1 ZFPM1         | K17441 |
| ENSG00000257727 | -0.18395  | 5.880459 | 0.782151 | 1 CNPY2         | K01647 |
| ENSG00000103248 | -0.202606 | 3.519328 | 0.782172 | 1 MTHFSD        | -      |
| ENSG00000213390 | -0.195417 | 3.51538  | 0.782172 | 1 ARHGAP19      | -      |
| ENSG00000167110 | 0.182621  | 6.631163 | 0.782255 | 1 GOLGA2        | -      |
| ENSG00000104728 | 0.185165  | 5.175771 | 0.782296 | 1 ARHGEF10      | K16727 |
| ENSG00000162066 | 0.18686   | 5.229402 | 0.782297 | 1 AMDHD2        | K01443 |
| ENSG00000188313 | -0.184445 | 5.828199 | 0.782305 | 1 PLSCR1        | -      |
| ENSG00000136205 | -0.184363 | 5.962154 | 0.782306 | 1 TNS3          | K18080 |
| ENSG00000124783 | -0.181108 | 8.664421 | 0.782309 | 1 SSR1          | K13249 |
| ENSG00000100813 | 0.181842  | 7.169008 | 0.782438 | 1 ACIN1         | K12875 |
| ENSG00000068724 | 0.183018  | 5.946538 | 0.782453 | 1 TTC7A         | -      |
| ENSG00000136891 | -0.183988 | 5.759489 | 0.78264  | 1 TEX10         | K14827 |
| ENSG00000115274 | 0.191597  | 4.531365 | 0.782666 | 1 INO80B        | K11666 |
| ENSG00000021355 | 0.181677  | 7.101255 | 0.782708 | 1 SERPINB1      | K13963 |
| ENSG00000171914 | -0.19347  | 4.254794 | 0.782734 | 1 TLN2          | -      |
| ENSG00000058272 | -0.182591 | 6.488652 | 0.782775 | 1 PPP1R12A      | K06270 |
| ENSG00000181991 | -0.182441 | 5.705091 | 0.782827 | 1 MRPS11        | K02948 |
| ENSG00000168090 | -0.181398 | 7.385622 | 0.782862 | 1 COPS6         | K12179 |
| ENSG00000185122 | 0.195925  | 3.425462 | 0.782984 | 1 HSF1          | K09414 |
| ENSG00000114107 | -0.186311 | 5.263357 | 0.783008 | 1 CEP70         | -      |
| ENSG00000116062 | 0.180729  | 8.020212 | 0.783023 | 1 MSH6          | K08737 |
| ENSG00000068137 | 0.182626  | 6.174505 | 0.783064 | 1 PLEKHH3       | -      |
| ENSG00000156261 | -0.180204 | 9.55709  | 0.78308  | 1 CCT8          | K09500 |
| ENSG00000111142 | -0.180768 | 7.949861 | 0.783109 | 1 METAP2        | K01265 |
| ENSG00000141447 | 0.181384  | 6.059433 | 0.783125 | 1 OSBPL1A       | K04613 |
| ENSG00000169902 | -0.217756 | 3.011604 | 0.783139 | 1 TPST1         | K01021 |
| ENSG00000256069 | -0.298631 | 1.341373 | 0.783156 | 1 A2MP1         | -      |
| ENSG00000203879 | 0.260153  | 1.324302 | 0.783156 | 1 GDI1          | K17255 |
| ENSG00000225695 | 0.260153  | 1.324302 | 0.783156 | 1 HNRNPA1P35    | K12741 |
| ENSG00000267288 | 0.260153  | 1.324302 | 0.783156 | 1 RP13-890H12.2 | -      |
| ENSG00000167770 | -0.184794 | 5.968465 | 0.783179 | 1 OTUB1         | K09602 |
| ENSG00000162772 | 0.184169  | 5.935107 | 0.783198 | 1 ATF3          | K09032 |
| ENSG00000182220 | 0.180984  | 7.383969 | 0.783219 | 1 ATP6AP2       | K19514 |
| ENSG00000103227 | 0.226499  | 2.397327 | 0.783346 | 1 LMF1          | -      |
| ENSG00000198246 | 0.226499  | 2.397327 | 0.783346 | 1 SLC29A3       | K15014 |
| ENSG00000102554 | 0.180846  | 7.380021 | 0.783385 | 1 KLF5          | K09206 |
| ENSG00000102984 | 0.224682  | 1.964351 | 0.783418 | 1 ZNF821        | K02981 |
| ENSG00000236017 | -0.219267 | 1.973729 | 0.783418 | 1 ASMTL-AS1     | -      |
| ENSG00000185608 | -0.186892 | 5.317106 | 0.783439 | 1 MRPL40        | K17421 |

|                 |           |          |          |   |             |        |
|-----------------|-----------|----------|----------|---|-------------|--------|
| ENSG00000184903 | 0.188115  | 3.832142 | 0.78348  | 1 | IMMP2L      | K09648 |
| ENSG00000115241 | 0.180274  | 8.146867 | 0.783481 | 1 | PPM1G       | K17499 |
| ENSG00000185187 | 0.185751  | 4.878855 | 0.783519 | 1 | SIGIRR      | K05169 |
| ENSG00000243317 | -0.183482 | 5.63098  | 0.783588 | 1 | C7orf73     | K14444 |
| ENSG00000166734 | -0.18126  | 6.919518 | 0.783602 | 1 | CASC4       | K02927 |
| ENSG00000179295 | -0.180582 | 7.461426 | 0.78374  | 1 | PTPN11      | -      |
| ENSG00000181817 | -0.185021 | 5.133307 | 0.783848 | 1 | LSM10       | -      |
| ENSG00000158417 | -0.179867 | 8.480007 | 0.783851 | 1 | EIF5B       | K03243 |
| ENSG00000132471 | 0.181219  | 6.645259 | 0.783872 | 1 | WBP2        | -      |
| ENSG00000121210 | -0.188276 | 4.499132 | 0.783874 | 1 | KIAA0922    | -      |
| ENSG00000151332 | -0.188276 | 4.499132 | 0.783874 | 1 | MBIP        | -      |
| ENSG00000108270 | -0.180856 | 7.058156 | 0.783883 | 1 | AATF        | K14782 |
| ENSG00000104381 | -0.19256  | 3.905871 | 0.784027 | 1 | GDAP1       | -      |
| ENSG00000145214 | -0.19256  | 3.905871 | 0.784027 | 1 | DGKQ        | K00901 |
| ENSG00000177951 | 0.181862  | 5.692736 | 0.784061 | 1 | BET1L       | K08504 |
| ENSG00000156671 | 0.182555  | 6.020749 | 0.784129 | 1 | SAMD8       | K12581 |
| ENSG00000183691 | -0.189427 | 3.771064 | 0.784189 | 1 | NOG         | K04658 |
| ENSG00000160741 | 0.181885  | 5.957879 | 0.784209 | 1 | CRTC2       | K16333 |
| ENSG00000151465 | -0.180181 | 7.420832 | 0.784251 | 1 | CDC123      | -      |
| ENSG00000154864 | 0.180011  | 7.430761 | 0.784316 | 1 | PIEZO2      | -      |
| ENSG00000160993 | 0.196697  | 3.972837 | 0.784525 | 1 | ALKBH4      | K10766 |
| ENSG00000130748 | -0.182517 | 5.810353 | 0.784578 | 1 | TMEM160     | -      |
| ENSG00000090432 | 0.19079   | 4.502616 | 0.784665 | 1 | MUL1        | K15688 |
| ENSG00000213694 | 0.219065  | 2.57724  | 0.784749 | 1 | S1PR3       | K04290 |
| ENSG00000090612 | 0.203153  | 2.585091 | 0.784749 | 1 | ZNF268      | K09228 |
| ENSG00000204514 | 0.203153  | 2.585091 | 0.784749 | 1 | ZNF814      | K09228 |
| ENSG00000106367 | -0.180166 | 6.931419 | 0.784866 | 1 | AP1S1       | K12394 |
| ENSG00000164587 | 0.178548  | 9.912461 | 0.78493  | 1 | RPS14       | K02955 |
| ENSG00000198856 | -0.180376 | 6.704865 | 0.784972 | 1 | OSTC        | K14572 |
| ENSG00000042286 | 0.186647  | 4.747768 | 0.784978 | 1 | AIFM2       | K11504 |
| ENSG00000156411 | -0.181787 | 5.996881 | 0.785017 | 1 | C14orf2     | K18193 |
| ENSG00000168802 | -0.181095 | 5.829746 | 0.785026 | 1 | CHTF8       | K11270 |
| ENSG00000077458 | -0.186275 | 4.860628 | 0.7851   | 1 | FAM76B      | -      |
| ENSG00000185219 | 0.191988  | 3.910057 | 0.785211 | 1 | ZNF445      | K09229 |
| ENSG00000109689 | -0.190668 | 3.917498 | 0.785211 | 1 | STIM2       | K18196 |
| ENSG00000262468 | 0.215263  | 2.202164 | 0.785265 | 1 | RP11-95P2.1 | -      |
| ENSG00000073417 | 0.183389  | 5.776798 | 0.785291 | 1 | PDE8A       | K18437 |
| ENSG00000159335 | -0.179016 | 7.764211 | 0.785304 | 1 | PTMS        | -      |
| ENSG00000172301 | -0.18578  | 5.144501 | 0.785379 | 1 | COPRS       | -      |
| ENSG00000253738 | -0.187038 | 4.931272 | 0.785564 | 1 | GS1-251I9.4 | -      |
| ENSG00000125967 | 0.181104  | 5.517933 | 0.785672 | 1 | NECAB3      | -      |
| ENSG00000121058 | -0.182867 | 5.477161 | 0.785776 | 1 | COIL        | K13150 |
| ENSG00000127870 | -0.18103  | 5.476177 | 0.785776 | 1 | RNF6        | -      |
| ENSG00000007168 | 0.17883   | 7.351537 | 0.785776 | 1 | PAFAH1B1    | K16794 |
| ENSG00000048707 | 0.186038  | 4.961472 | 0.785779 | 1 | VPS13D      | K19527 |
| ENSG00000071794 | 0.178708  | 7.454472 | 0.785821 | 1 | HLTF        | K15711 |
| ENSG00000227671 | -0.192293 | 3.625984 | 0.785824 | 1 | MIR3916     | K09228 |
| ENSG00000204923 | -0.244122 | 1.718494 | 0.785998 | 1 | FBXO48      | K17985 |
| ENSG00000238103 | -0.244122 | 1.718494 | 0.785998 | 1 | RPL9P7      | K02940 |
| ENSG00000099365 | 0.238385  | 1.679497 | 0.785998 | 1 | STX1B       | K08486 |
| ENSG00000115239 | 0.208119  | 1.694709 | 0.785998 | 1 | GPR75-ASB3  | K10325 |
| ENSG00000116711 | -0.182414 | 4.721369 | 0.786065 | 1 | PLA2G4A     | K16342 |
| ENSG00000119414 | -0.179924 | 6.386563 | 0.786099 | 1 | PPP6C       | K15498 |
| ENSG00000139637 | -0.181484 | 5.765143 | 0.786154 | 1 | C12orf10    | -      |
| ENSG00000132275 | -0.183469 | 5.206337 | 0.786237 | 1 | RRP8        | K14850 |
| ENSG00000137200 | -0.183469 | 5.206337 | 0.786237 | 1 | CMTR1       | K14589 |
| ENSG00000115902 | -0.188131 | 4.868157 | 0.786327 | 1 | SLC1A4      | K05615 |
| ENSG00000064999 | 0.185462  | 4.967097 | 0.78635  | 1 | ANKS1A      | -      |

|                 |           |          |          |             |        |
|-----------------|-----------|----------|----------|-------------|--------|
| ENSG00000150990 | 0.180991  | 5.310173 | 0.786417 | 1 DHX37     | K14780 |
| ENSG00000154813 | -0.185754 | 4.563547 | 0.786495 | 1 DPH3      | K15455 |
| ENSG00000115884 | -0.180896 | 5.975453 | 0.786506 | 1 SDC1      | K06257 |
| ENSG00000185163 | -0.184509 | 4.686064 | 0.78651  | 1 DDX51     | K14807 |
| ENSG00000047621 | -0.183453 | 4.798986 | 0.786523 | 1 C12orf4   | -      |
| ENSG00000169371 | -0.182546 | 4.903708 | 0.786534 | 1 SNUPN     | K13151 |
| ENSG00000142444 | 0.184999  | 4.999017 | 0.786543 | 1 C19orf52  | K00779 |
| ENSG00000113758 | 0.178213  | 7.181141 | 0.786677 | 1 DBN1      | -      |
| ENSG00000127990 | -0.180962 | 5.437264 | 0.786712 | 1 SGCE      | -      |
| ENSG00000124098 | 0.186612  | 4.166213 | 0.786761 | 1 FAM210B   | -      |
| ENSG00000149016 | 0.186612  | 4.166213 | 0.786761 | 1 TUT1      | K18709 |
| ENSG00000196683 | -0.178173 | 7.254607 | 0.786786 | 1 TOMM7     | K17771 |
| ENSG00000104064 | -0.184125 | 5.389977 | 0.786855 | 1 GABPB1    | K09454 |
| ENSG00000112146 | -0.182788 | 5.314903 | 0.786865 | 1 FBXO9     | K10295 |
| ENSG00000072803 | 0.178871  | 6.438129 | 0.786976 | 1 FBXW11    | K03362 |
| ENSG00000083720 | -0.177323 | 8.176707 | 0.787002 | 1 OXCT1     | K01027 |
| ENSG00000110697 | 0.179168  | 6.159837 | 0.787024 | 1 PITPNM1   | -      |
| ENSG00000160208 | -0.178433 | 6.814049 | 0.787071 | 1 RRP1B     | K14849 |
| ENSG00000105640 | 0.176712  | 9.385186 | 0.787194 | 1 RPL18A    | K02882 |
| ENSG00000171298 | 0.18178   | 5.209381 | 0.7872   | 1 GAA       | K12316 |
| ENSG00000076924 | 0.178744  | 6.397054 | 0.787201 | 1 XAB2      | K12867 |
| ENSG00000103495 | 0.179771  | 6.102226 | 0.787212 | 1 MAZ       | -      |
| ENSG00000167716 | 0.184013  | 5.03561  | 0.787268 | 1 WDR81     | K17601 |
| ENSG00000161021 | 0.181537  | 5.391889 | 0.787279 | 1 MAML1     | K06061 |
| ENSG00000120053 | -0.178161 | 6.348894 | 0.787345 | 1 GOT1      | K14454 |
| ENSG00000151353 | 0.188858  | 4.281258 | 0.787363 | 1 TMEM18    | -      |
| ENSG00000243364 | 0.188858  | 4.281258 | 0.787363 | 1 EFNA4     | K05462 |
| ENSG00000140990 | -0.177755 | 7.146182 | 0.787405 | 1 NDUFB10   | K03966 |
| ENSG00000121060 | -0.178361 | 6.650078 | 0.787425 | 1 TRIM25    | -      |
| ENSG00000178913 | -0.177597 | 7.199925 | 0.787525 | 1 TAF7      | K03132 |
| ENSG00000171861 | -0.182224 | 5.442312 | 0.787532 | 1 RNMTL1    | -      |
| ENSG00000107902 | -0.194196 | 3.931969 | 0.787539 | 1 LHPP      | K11725 |
| ENSG00000164438 | -0.194196 | 3.931969 | 0.787539 | 1 TLX3      | K15607 |
| ENSG00000131023 | -0.18067  | 4.877107 | 0.78754  | 1 LATS1     | K08791 |
| ENSG00000118242 | 0.215384  | 2.606444 | 0.787606 | 1 MREG      | -      |
| ENSG00000111247 | -0.179629 | 6.273291 | 0.787613 | 1 RAD51AP1  | -      |
| ENSG00000135974 | 0.182327  | 5.130133 | 0.787739 | 1 C2orf49   | K15432 |
| ENSG00000061938 | 0.179741  | 5.829458 | 0.787745 | 1 TNK2      | K08886 |
| ENSG00000132017 | 0.180121  | 5.318996 | 0.787756 | 1 DCAF15    | K11791 |
| ENSG00000138279 | -0.177384 | 7.193354 | 0.787783 | 1 ANXA7     | K17095 |
| ENSG00000245060 | -0.203299 | 3.468762 | 0.787831 | 1 LINC00847 | -      |
| ENSG00000100938 | 0.178553  | 6.178742 | 0.787841 | 1 GMPR2     | K00364 |
| ENSG00000132591 | -0.178183 | 6.523855 | 0.787862 | 1 ERAL1     | -      |
| ENSG00000050327 | 0.188417  | 3.997865 | 0.787871 | 1 ARHGEF5   | -      |
| ENSG00000141295 | -0.18169  | 4.946969 | 0.787884 | 1 SCRIN2    | K14358 |
| ENSG00000241837 | -0.1768   | 7.770859 | 0.7879   | 1 ATP5O     | K02137 |
| ENSG00000179409 | -0.178173 | 6.439025 | 0.78804  | 1 GEMIN4    | K13132 |
| ENSG00000147121 | -0.191284 | 3.799698 | 0.78804  | 1 KRBOX4    | K09228 |
| ENSG00000156011 | -0.191284 | 3.799698 | 0.78804  | 1 PSD3      | K12494 |
| ENSG00000119523 | -0.178943 | 5.903344 | 0.788091 | 1 ALG2      | K03843 |
| ENSG00000182534 | 0.178213  | 6.078387 | 0.788102 | 1 MXRA7     | -      |
| ENSG00000139405 | -0.179247 | 5.85192  | 0.788143 | 1 RITA1     | -      |
| ENSG00000028528 | 0.177643  | 6.512124 | 0.788281 | 1 SNX1      | K17917 |
| ENSG00000117266 | 0.182175  | 4.914231 | 0.788303 | 1 CDK18     | K15596 |
| ENSG00000134255 | -0.179468 | 5.350779 | 0.788317 | 1 CEPT1     | K13644 |
| ENSG00000160803 | -0.17797  | 6.385521 | 0.788387 | 1 UBQLN4    | K04523 |
| ENSG00000254535 | 0.196117  | 2.770194 | 0.788394 | 1 PABPC4L   | K13126 |
| ENSG00000130227 | 0.176888  | 6.292859 | 0.788588 | 1 XPO7      | K18460 |

|                 |           |          |          |                 |        |
|-----------------|-----------|----------|----------|-----------------|--------|
| ENSG00000181026 | -0.178047 | 6.021382 | 0.78862  | 1 AEN           | K18340 |
| ENSG00000173276 | -0.182291 | 5.518854 | 0.788656 | 1 ZBTB21        | -      |
| ENSG00000205643 | 0.18343   | 3.936192 | 0.788685 | 1 CDPF1         | -      |
| ENSG00000198815 | 0.177992  | 6.05349  | 0.788756 | 1 FOXJ3         | K09403 |
| ENSG00000260077 | -0.230704 | 2.248325 | 0.788912 | 1 RP11-254F7.2  | -      |
| ENSG00000103175 | -0.213038 | 2.238356 | 0.788912 | 1 WFDC1         | -      |
| ENSG00000129493 | 0.178839  | 5.83869  | 0.788987 | 1 HEATR5A       | -      |
| ENSG00000015133 | -0.197897 | 2.927122 | 0.789028 | 1 CCDC88C       | -      |
| ENSG00000100711 | -0.181287 | 4.662016 | 0.78908  | 1 ZFYVE21       | -      |
| ENSG00000135912 | -0.181287 | 4.662016 | 0.78908  | 1 TTLL4         | K16601 |
| ENSG00000247077 | -0.177005 | 5.876746 | 0.789132 | 1 PGAM5         | K15637 |
| ENSG00000205730 | -0.17648  | 6.951046 | 0.789158 | 1 ITPRIPL2      | K17985 |
| ENSG00000143079 | -0.180884 | 4.988971 | 0.789159 | 1 CTTNBP2NL     | K12795 |
| ENSG00000164818 | 0.17646   | 6.297329 | 0.789264 | 1 HEATR2        | K19759 |
| ENSG00000114770 | -0.178904 | 5.38264  | 0.789279 | 1 ABCC5         | K05668 |
| ENSG00000198952 | 0.176284  | 6.790692 | 0.789432 | 1 SMG5          | K11125 |
| ENSG00000152223 | 0.185434  | 4.129086 | 0.789451 | 1 EPG5          | K17985 |
| ENSG00000173218 | -0.178144 | 5.808014 | 0.789466 | 1 VANGL1        | K04510 |
| ENSG00000235363 | -0.210037 | 3.054281 | 0.789549 | 1 SNRPGP10      | K11099 |
| ENSG00000164053 | -0.190862 | 3.879291 | 0.78957  | 1 ATRIP         | K10905 |
| ENSG00000100316 | 0.174439  | 11.20149 | 0.78962  | 1 RPL3          | K02925 |
| ENSG00000147100 | 0.287666  | 1.373975 | 0.789628 | 1 SLC16A2       | K08231 |
| ENSG00000231841 | 0.287666  | 1.373975 | 0.789628 | 1 RP11-206F17.2 | -      |
| ENSG00000235374 | 0.287666  | 1.373975 | 0.789628 | 1 SSR4P1        | K04571 |
| ENSG00000261353 | 0.287666  | 1.373975 | 0.789628 | 1 CTA-14H9.5    | -      |
| ENSG00000109680 | -0.281892 | 1.408368 | 0.789628 | 1 TBC1D19       | -      |
| ENSG00000130066 | 0.175338  | 7.550298 | 0.789693 | 1 SAT1          | K00657 |
| ENSG00000138463 | 0.184931  | 4.665424 | 0.789771 | 1 DIRC2         | K15381 |
| ENSG00000133027 | -0.180948 | 5.024411 | 0.789827 | 1 PEMT          | K00551 |
| ENSG00000108587 | -0.178079 | 5.654663 | 0.789894 | 1 GOSR1         | K08495 |
| ENSG00000119421 | -0.177422 | 6.24988  | 0.789979 | 1 NDUFA8        | K03952 |
| ENSG00000225210 | -0.189442 | 3.175269 | 0.789984 | 1 AL589743.1    | -      |
| ENSG00000123146 | 0.175284  | 7.20542  | 0.790087 | 1 CD97          | K08446 |
| ENSG00000235655 | 0.175791  | 6.692261 | 0.790157 | 1 H3F3AP4       | K11253 |
| ENSG00000131747 | 0.174235  | 9.180653 | 0.790159 | 1 TOP2A         | K03164 |
| ENSG00000161011 | 0.174644  | 7.953749 | 0.790209 | 1 SQSTM1        | K14381 |
| ENSG00000198663 | 0.176061  | 5.88324  | 0.790328 | 1 C6orf89       | K12733 |
| ENSG00000170540 | 0.17467   | 7.662434 | 0.790386 | 1 ARL6IP1       | -      |
| ENSG00000110171 | 0.183697  | 4.711387 | 0.79058  | 1 TRIM3         | K11997 |
| ENSG00000198727 | 0.173621  | 11.03795 | 0.790596 | 1 MT-CYB        | K00412 |
| ENSG00000125656 | -0.175985 | 6.440042 | 0.790599 | 1 CLPP          | K01358 |
| ENSG00000130699 | -0.183418 | 4.19853  | 0.790617 | 1 TAF4          | K03129 |
| ENSG00000239264 | -0.178097 | 4.932681 | 0.790618 | 1 TXNDC5        | K13984 |
| ENSG00000101773 | -0.176788 | 6.020709 | 0.790733 | 1 RBBP8         | -      |
| ENSG00000197903 | 0.178127  | 5.937964 | 0.790775 | 1 HIST1H2BK     | K11252 |
| ENSG00000166326 | -0.177908 | 5.870766 | 0.790872 | 1 TRIM44        | K12020 |
| ENSG00000174028 | -0.207256 | 2.800896 | 0.790883 | 1 FAM3C2        | -      |
| ENSG00000266208 | -0.207256 | 2.800896 | 0.790883 | 1 CTD-2267D19.3 | K07627 |
| ENSG00000002330 | -0.184807 | 4.308796 | 0.790928 | 1 BAD           | K02158 |
| ENSG00000198171 | -0.180203 | 5.064248 | 0.790985 | 1 DDRGK1        | -      |
| ENSG00000034713 | 0.175239  | 5.922845 | 0.791015 | 1 GABARAPL2     | K08341 |
| ENSG00000169914 | 0.180802  | 4.360367 | 0.791067 | 1 OTUD3         | K13717 |
| ENSG00000086200 | -0.176948 | 6.055386 | 0.791087 | 1 IPO11         | -      |
| ENSG00000146872 | -0.177309 | 5.600601 | 0.79112  | 1 TLK2          | K08864 |
| ENSG00000129932 | -0.182379 | 4.677517 | 0.791141 | 1 DOHH          | K06072 |
| ENSG00000156931 | -0.182379 | 4.677517 | 0.791141 | 1 VPS8          | -      |
| ENSG00000145740 | -0.175167 | 6.61207  | 0.791234 | 1 SLC30A5       | K14692 |
| ENSG00000086475 | -0.175419 | 6.450604 | 0.791242 | 1 SEPHS1        | K01008 |

|                 |           |          |          |                |        |
|-----------------|-----------|----------|----------|----------------|--------|
| ENSG00000161980 | -0.17574  | 6.132367 | 0.791282 | 1 POLR3K       | K03019 |
| ENSG00000155506 | 0.173669  | 8.026752 | 0.79131  | 1 LARP1        | K18757 |
| ENSG00000164889 | 0.173729  | 7.667836 | 0.791489 | 1 SLC4A2       | K13855 |
| ENSG00000185722 | 0.174133  | 6.009194 | 0.791503 | 1 ANKFY1       | -      |
| ENSG00000085788 | 0.177796  | 5.098465 | 0.791577 | 1 DDHD2        | K16545 |
| ENSG00000111653 | 0.177696  | 4.594569 | 0.791637 | 1 ING4         | K11346 |
| ENSG00000104979 | 0.174025  | 7.127826 | 0.791652 | 1 C19orf53     | -      |
| ENSG00000198791 | -0.175115 | 6.397534 | 0.791705 | 1 CNOT7        | K12581 |
| ENSG00000103197 | 0.176984  | 5.707926 | 0.791714 | 1 TSC2         | K07207 |
| ENSG00000161204 | 0.175469  | 6.247937 | 0.791785 | 1 ABCF3        | K06158 |
| ENSG00000065491 | 0.181384  | 4.310364 | 0.791801 | 1 TBC1D22B     | -      |
| ENSG00000129968 | 0.173775  | 6.027476 | 0.791808 | 1 ABHD17A      | -      |
| ENSG00000197601 | -0.174331 | 6.851735 | 0.791823 | 1 FAR1         | K13356 |
| ENSG00000110422 | 0.177714  | 5.785571 | 0.79188  | 1 HIPK3        | K08826 |
| ENSG00000115468 | 0.218876  | 2.008805 | 0.791892 | 1 EFHD1        | -      |
| ENSG00000198561 | -0.174106 | 6.853252 | 0.792085 | 1 CTNND1       | K05690 |
| ENSG00000151338 | -0.197361 | 3.300863 | 0.792102 | 1 MIPOL1       | -      |
| ENSG00000088448 | 0.173528  | 7.236596 | 0.792116 | 1 ANKRD10      | -      |
| ENSG00000165271 | 0.174101  | 6.70114  | 0.792125 | 1 NOL6         | K14544 |
| ENSG00000213977 | -0.183405 | 4.034374 | 0.792176 | 1 TAX1BP3      | -      |
| ENSG00000164045 | -0.178136 | 5.16173  | 0.792196 | 1 CDC25A       | K06645 |
| ENSG00000196352 | 0.17223   | 11.12913 | 0.792228 | 1 CD55         | K04006 |
| ENSG00000142178 | -0.172521 | 9.123003 | 0.792232 | 1 SIK1         | K19008 |
| ENSG00000160446 | -0.180172 | 4.646346 | 0.792424 | 1 ZDHHC12      | K18932 |
| ENSG00000050438 | 0.357477  | 0.297976 | 0.792443 | 1 SLC4A8       | K13859 |
| ENSG00000129282 | 0.357477  | 0.297976 | 0.792443 | 1 MRM1         | K15507 |
| ENSG00000223802 | 0.357477  | 0.297976 | 0.792443 | 1 CERS1        | K04710 |
| ENSG00000231113 | 0.357477  | 0.297976 | 0.792443 | 1 RP3-475N16.1 | -      |
| ENSG00000231443 | 0.357477  | 0.297976 | 0.792443 | 1 AC024937.6   | K15425 |
| ENSG00000188554 | -0.173153 | 7.477779 | 0.792444 | 1 NBR1         | K17987 |
| ENSG00000142675 | 0.180727  | 3.493526 | 0.792468 | 1 CNKSR1       | -      |
| ENSG00000090520 | -0.173523 | 7.058516 | 0.792483 | 1 DNAJB11      | K09517 |
| ENSG00000147162 | 0.172731  | 7.876838 | 0.792511 | 1 OGT          | K09667 |
| ENSG00000122882 | -0.177359 | 5.612293 | 0.792552 | 1 ECD          | -      |
| ENSG00000198089 | -0.179542 | 4.803686 | 0.792677 | 1 SFI1         | K17985 |
| ENSG00000130313 | -0.174062 | 6.525773 | 0.792688 | 1 PGLS         | K01057 |
| ENSG00000143761 | 0.172135  | 8.649463 | 0.792808 | 1 ARF1         | K07937 |
| ENSG00000196456 | -0.223738 | 2.47029  | 0.792819 | 1 ZNF775       | -      |
| ENSG00000187147 | -0.175528 | 6.020037 | 0.79285  | 1 RNF220       | -      |
| ENSG00000102580 | -0.175931 | 5.657272 | 0.792962 | 1 DNAJC3       | K09523 |
| ENSG00000184117 | -0.172529 | 7.534664 | 0.793123 | 1 NIPSNAP1     | -      |
| ENSG00000213625 | -0.173187 | 6.822999 | 0.79321  | 1 LEPROT       | K17985 |
| ENSG00000160796 | -0.176041 | 5.57233  | 0.793211 | 1 NBEAL2       | -      |
| ENSG00000169139 | -0.172432 | 7.502643 | 0.793267 | 1 UBE2V2       | K10704 |
| ENSG00000140395 | -0.173543 | 6.204857 | 0.793323 | 1 WDR61        | K12602 |
| ENSG00000130023 | -0.204779 | 2.955843 | 0.793482 | 1 ERMARD       | -      |
| ENSG00000183808 | 0.17547   | 5.595323 | 0.793594 | 1 RBM12B       | -      |
| ENSG00000166471 | -0.173435 | 5.959359 | 0.793594 | 1 TMEM41B      | -      |
| ENSG00000142494 | -0.193066 | 3.090377 | 0.793618 | 1 SLC47A1      | K03327 |
| ENSG00000092871 | -0.183296 | 3.084993 | 0.793618 | 1 RFFL         | K10871 |
| ENSG00000132323 | -0.179753 | 4.477602 | 0.793658 | 1 ILKAP        | K17500 |
| ENSG00000066135 | -0.174723 | 5.72263  | 0.793697 | 1 KDM4A        | K06709 |
| ENSG00000135316 | -0.17166  | 7.963317 | 0.7938   | 1 SYNCRIP      | K13160 |
| ENSG00000111907 | 0.172989  | 6.44669  | 0.793853 | 1 TPD52L1      | -      |
| ENSG00000149782 | -0.174853 | 5.744047 | 0.794036 | 1 PLCB3        | K05858 |
| ENSG00000213799 | -0.185217 | 3.91453  | 0.794203 | 1 ZNF845       | K09228 |
| ENSG00000119013 | -0.175825 | 5.416892 | 0.794231 | 1 NDUFB3       | K03959 |
| ENSG00000099290 | -0.186725 | 4.04772  | 0.794264 | 1 FAM21A       | K18462 |

|                 |           |          |          |                 |        |
|-----------------|-----------|----------|----------|-----------------|--------|
| ENSG00000138785 | -0.182169 | 4.435706 | 0.794411 | 1 INTS12        | K13149 |
| ENSG00000196712 | -0.173914 | 5.965683 | 0.794426 | 1 NF1           | K08052 |
| ENSG00000173875 | 0.177428  | 4.479278 | 0.794426 | 1 ZNF791        | K09228 |
| ENSG00000140284 | 0.172355  | 6.527413 | 0.794455 | 1 SLC27A2       | K08746 |
| ENSG00000027847 | -0.178043 | 4.660268 | 0.794478 | 1 B4GALT7       | K00733 |
| ENSG00000197961 | 0.17336   | 6.294527 | 0.794512 | 1 ZNF121        | K09228 |
| ENSG00000196199 | -0.175211 | 5.420989 | 0.794633 | 1 MPHOSPH8      | -      |
| ENSG00000021762 | 0.174935  | 5.581641 | 0.794656 | 1 OSBPL5        | -      |
| ENSG00000130312 | -0.173279 | 6.269905 | 0.794729 | 1 MRPL34        | K02914 |
| ENSG00000143314 | -0.172456 | 6.387109 | 0.794844 | 1 MRPL24        | K02895 |
| ENSG00000066279 | -0.171566 | 6.940759 | 0.79494  | 1 ASPM          | K16743 |
| ENSG00000077147 | -0.170726 | 7.880204 | 0.794959 | 1 TM9SF3        | K17087 |
| ENSG00000228300 | -0.173624 | 5.986567 | 0.794975 | 1 C19orf24      | -      |
| ENSG00000162385 | -0.175362 | 5.447341 | 0.795031 | 1 MAGOH         | K12877 |
| ENSG00000158186 | -0.175381 | 5.212248 | 0.795062 | 1 MRAS          | K07831 |
| ENSG00000109381 | 0.17239   | 5.181849 | 0.795066 | 1 ELF2          | K09428 |
| ENSG00000104218 | -0.175488 | 5.095336 | 0.795079 | 1 CSPP1         | K16771 |
| ENSG00000196214 | -0.175409 | 4.931237 | 0.795106 | 1 ZNF766        | K09228 |
| ENSG00000230330 | -0.303361 | 0.988168 | 0.795106 | 1 HMGN2P3       | K11300 |
| ENSG00000267534 | -0.303361 | 0.988168 | 0.795106 | 1 S1PR2         | K04292 |
| ENSG00000010295 | 0.282388  | 0.946849 | 0.795106 | 1 IFFO1         | -      |
| ENSG00000164620 | 0.282388  | 0.946849 | 0.795106 | 1 RELL2         | -      |
| ENSG00000213928 | 0.282388  | 0.946849 | 0.795106 | 1 IRF9          | K04693 |
| ENSG00000140511 | 0.23024   | 0.973007 | 0.795106 | 1 HAPLN3        | K06852 |
| ENSG00000185437 | 0.23024   | 0.973007 | 0.795106 | 1 SH3BGR        | -      |
| ENSG00000269963 | 0.23024   | 0.973007 | 0.795106 | 1 RP11-73M18.9  | -      |
| ENSG00000170515 | -0.170242 | 8.578375 | 0.795122 | 1 PA2G4         | -      |
| ENSG00000042753 | -0.170974 | 7.362958 | 0.795122 | 1 AP2S1         | K11827 |
| ENSG00000142784 | 0.1783    | 4.661993 | 0.795153 | 1 WDTC1         | K11807 |
| ENSG00000140941 | 0.171839  | 6.286673 | 0.795171 | 1 MAP1LC3B      | K14230 |
| ENSG00000230055 | -0.172148 | 6.389203 | 0.795201 | 1 CISD3         | K11460 |
| ENSG00000160218 | 0.172738  | 5.918494 | 0.795265 | 1 TRAPPC10      | -      |
| ENSG00000221838 | -0.185131 | 3.988188 | 0.795311 | 1 AP4M1         | K12402 |
| ENSG00000157911 | 0.183462  | 3.686449 | 0.795396 | 1 PEX10         | K13346 |
| ENSG00000119321 | -0.175648 | 5.498643 | 0.795405 | 1 FKBP15        | K17478 |
| ENSG00000008382 | 0.185811  | 3.520454 | 0.79545  | 1 MPND          | -      |
| ENSG00000184967 | -0.174514 | 5.066853 | 0.795596 | 1 NOC4L         | K14771 |
| ENSG00000177042 | 0.190598  | 2.820875 | 0.795689 | 1 TMEM80        | -      |
| ENSG00000248569 | -0.235825 | 1.454688 | 0.795724 | 1 CTC-512J14.5  | K15170 |
| ENSG00000258985 | -0.235825 | 1.454688 | 0.795724 | 1 RP11-368P15.3 | -      |
| ENSG00000137574 | -0.174163 | 5.547247 | 0.795755 | 1 TGS1          | K14292 |
| ENSG00000125898 | 0.206157  | 2.276739 | 0.795849 | 1 FAM110A       | K05467 |
| ENSG00000188931 | 0.206157  | 2.276739 | 0.795849 | 1 C1orf192      | -      |
| ENSG00000186487 | 0.252219  | 1.771325 | 0.795875 | 1 MYT1L         | -      |
| ENSG00000228672 | 0.252219  | 1.771325 | 0.795875 | 1 PROB1         | -      |
| ENSG00000182185 | -0.233411 | 1.770449 | 0.795875 | 1 RAD51B        | K10869 |
| ENSG00000138660 | -0.171943 | 5.328045 | 0.795901 | 1 APIAR         | -      |
| ENSG00000164172 | -0.172582 | 5.132035 | 0.796053 | 1 MOCS2         | K03635 |
| ENSG00000172340 | 0.17168   | 5.976104 | 0.796068 | 1 SUCLG2        | K01900 |
| ENSG00000123143 | -0.17004  | 7.437409 | 0.796145 | 1 PKN1          | K06071 |
| ENSG00000077454 | -0.181969 | 4.238538 | 0.79615  | 1 LRCH4         | -      |
| ENSG00000058600 | 0.173148  | 6.090665 | 0.796228 | 1 POLR3E        | K14721 |
| ENSG00000150753 | -0.168893 | 10.46264 | 0.796238 | 1 CCT5          | K09497 |
| ENSG00000114745 | 0.178046  | 4.865393 | 0.79629  | 1 GORASP1       | -      |
| ENSG00000070269 | -0.183403 | 3.999175 | 0.796375 | 1 TMEM260       | -      |
| ENSG00000137834 | 0.171932  | 5.927174 | 0.796393 | 1 SMAD6         | K04677 |
| ENSG00000167889 | 0.176628  | 4.714766 | 0.796447 | 1 MGAT5B        | K09661 |
| ENSG00000114784 | -0.177772 | 4.591039 | 0.796589 | 1 EIF1B         | K03113 |

|                 |           |          |          |                 |        |
|-----------------|-----------|----------|----------|-----------------|--------|
| ENSG0000096060  | 0.170025  | 5.963496 | 0.796631 | 1 FKBP5         | K09571 |
| ENSG00000108582 | 0.169625  | 7.303678 | 0.796638 | 1 CPD           | K07752 |
| ENSG00000114346 | -0.169335 | 7.71839  | 0.796722 | 1 ECT2          | -      |
| ENSG00000165688 | -0.16979  | 7.175008 | 0.796725 | 1 PMPCA         | K01412 |
| ENSG00000177663 | 0.181079  | 4.4004   | 0.796823 | 1 IL17RA        | K05164 |
| ENSG00000091483 | -0.169472 | 7.427264 | 0.796824 | 1 FH            | K01679 |
| ENSG00000251322 | 0.175131  | 4.831893 | 0.796922 | 1 SHANK3        | K15009 |
| ENSG00000100325 | 0.170629  | 5.685069 | 0.797009 | 1 ASCC2         | K18667 |
| ENSG00000213326 | 0.178954  | 4.242451 | 0.797044 | 1 RPS7P11       | K02993 |
| ENSG00000117676 | 0.170603  | 6.3001   | 0.797135 | 1 RPS6KA1       | K04373 |
| ENSG00000132024 | 0.171321  | 5.785563 | 0.797175 | 1 CC2D1A        | K18260 |
| ENSG00000167291 | 0.171321  | 5.785563 | 0.797175 | 1 TBC1D16       | -      |
| ENSG00000159579 | -0.171641 | 5.013576 | 0.797216 | 1 RSPRY1        | K17866 |
| ENSG00000198242 | -0.168497 | 8.497154 | 0.797216 | 1 RPL23A        | K02893 |
| ENSG00000123416 | -0.168191 | 9.564997 | 0.797218 | 1 TUBA1B        | K07374 |
| ENSG00000141552 | 0.172016  | 5.862262 | 0.797351 | 1 ANAPC11       | K03358 |
| ENSG00000257621 | -0.179944 | 4.552351 | 0.797366 | 1 RP11-349A22.5 | -      |
| ENSG00000187953 | -0.181605 | 3.937556 | 0.797547 | 1 PMS2CL        | K10858 |
| ENSG00000004700 | 0.169372  | 6.706596 | 0.797672 | 1 RECQL         | K10899 |
| ENSG00000111832 | 0.169422  | 6.649157 | 0.797702 | 1 RWDD1         | -      |
| ENSG00000146909 | -0.171375 | 5.628332 | 0.797792 | 1 NOM1          | K17583 |
| ENSG00000148356 | 0.175521  | 4.982478 | 0.797806 | 1 LRSAM1        | K10641 |
| ENSG00000072071 | 0.171084  | 5.583471 | 0.797882 | 1 LPHN1         | K04592 |
| ENSG00000164040 | -0.168397 | 7.572701 | 0.797952 | 1 PGRMC2        | K17278 |
| ENSG00000166441 | 0.167229  | 10.91177 | 0.798143 | 1 RPL27A        | K02900 |
| ENSG00000132670 | -0.178639 | 4.510655 | 0.798186 | 1 PTPRA         | K18032 |
| ENSG00000125901 | -0.170464 | 5.870028 | 0.798223 | 1 MRPS26        | K17405 |
| ENSG00000119285 | -0.17109  | 5.834374 | 0.798309 | 1 HEATR1        | K14550 |
| ENSG00000151690 | -0.213548 | 2.689893 | 0.798318 | 1 MFSD6         | -      |
| ENSG00000074416 | 0.168715  | 6.77752  | 0.798341 | 1 MGLL          | K01054 |
| ENSG00000073169 | 0.170447  | 5.795079 | 0.7984   | 1 SELO          | -      |
| ENSG00000166128 | -0.177021 | 4.415276 | 0.79841  | 1 RAB8B         | K07902 |
| ENSG00000163714 | -0.167573 | 8.226769 | 0.798448 | 1 U2SURP        | K12842 |
| ENSG00000215252 | -0.172021 | 5.890115 | 0.798467 | 1 GOLGA8B       | K10582 |
| ENSG00000160216 | -0.170027 | 5.873023 | 0.798512 | 1 AGPAT3        | K13523 |
| ENSG00000075790 | -0.168627 | 5.872277 | 0.798512 | 1 BCAP29        | K05545 |
| ENSG00000198824 | -0.197807 | 2.523821 | 0.798691 | 1 CHAMP1        | -      |
| ENSG00000132470 | 0.19721   | 2.50262  | 0.798691 | 1 ITGB4         | K06525 |
| ENSG00000099814 | 0.170939  | 5.544506 | 0.798702 | 1 CEP170B       | K16463 |
| ENSG00000122952 | -0.169443 | 6.200107 | 0.798706 | 1 ZWINT         | -      |
| ENSG00000233830 | 0.170914  | 4.810172 | 0.798788 | 1 EIF4HP1       | -      |
| ENSG00000130726 | 0.167096  | 8.361641 | 0.798872 | 1 TRIM28        | K08882 |
| ENSG00000162613 | 0.167622  | 7.415098 | 0.79889  | 1 FUBP1         | K13210 |
| ENSG00000140598 | -0.170538 | 5.322578 | 0.798909 | 1 EFTUD1        | K14536 |
| ENSG00000137815 | 0.168536  | 6.5274   | 0.798941 | 1 RTF1          | K15178 |
| ENSG00000104853 | 0.168375  | 6.64126  | 0.798944 | 1 CLPTM1        | -      |
| ENSG00000096063 | -0.167608 | 7.295398 | 0.799157 | 1 SRPK1         | K15409 |
| ENSG00000164930 | -0.169054 | 6.160836 | 0.799297 | 1 FZD6          | K02376 |
| ENSG00000140995 | 0.170594  | 5.548263 | 0.799422 | 1 DEF8          | -      |
| ENSG00000185950 | -0.168416 | 6.464091 | 0.799433 | 1 IRS2          | K07187 |
| ENSG00000113391 | -0.186467 | 3.13084  | 0.799437 | 1 FAM172A       | -      |
| ENSG00000167130 | 0.175742  | 4.014389 | 0.799504 | 1 DOLPP1        | K07252 |
| ENSG00000125812 | 0.172051  | 4.314853 | 0.799506 | 1 GZF1          | -      |
| ENSG00000172845 | 0.167807  | 6.686277 | 0.799543 | 1 SP3           | K09193 |
| ENSG00000129933 | 0.172818  | 5.503493 | 0.799568 | 1 MAU2          | K11266 |
| ENSG00000133131 | -0.170018 | 4.928345 | 0.799612 | 1 MORC4         | -      |
| ENSG00000188971 | 0.171257  | 4.736354 | 0.79963  | 1 RP11-427H3.3  | -      |
| ENSG00000047056 | 0.182279  | 3.947627 | 0.799717 | 1 WDR37         | -      |

|                 |           |           |          |                  |        |
|-----------------|-----------|-----------|----------|------------------|--------|
| ENSG00000167515 | 0.169122  | 5.860748  | 0.799721 | 1 TRAPPC2L       | -      |
| ENSG00000224660 | 0.230948  | 2.082488  | 0.799731 | 1 SH3BP5-AS1     | -      |
| ENSG00000064726 | -0.167051 | 7.30707   | 0.799801 | 1 BTBD1          | K10477 |
| ENSG00000184708 | 0.173748  | 5.030272  | 0.799808 | 1 EIF4ENIF1      | K18728 |
| ENSG00000134970 | -0.167681 | 6.734021  | 0.79982  | 1 TMED7          | K14825 |
| ENSG00000130590 | -0.19717  | 3.000181  | 0.799824 | 1 SAMD10         | -      |
| ENSG00000179051 | -0.16678  | 7.580744  | 0.79985  | 1 RCC2           | -      |
| ENSG00000073910 | -0.533966 | -0.648321 | 0.7999   | 1 FRY            | -      |
| ENSG00000102904 | -0.533966 | -0.648321 | 0.7999   | 1 TSNAXIP1       | -      |
| ENSG00000120217 | -0.533966 | -0.648321 | 0.7999   | 1 CD274          | K06745 |
| ENSG00000129226 | -0.533966 | -0.648321 | 0.7999   | 1 CD68           | K06501 |
| ENSG00000135083 | -0.533966 | -0.648321 | 0.7999   | 1 CCNJL          | -      |
| ENSG00000136367 | -0.533966 | -0.648321 | 0.7999   | 1 ZFHX2          | K09379 |
| ENSG00000140403 | -0.533966 | -0.648321 | 0.7999   | 1 DNAJA4         | K09505 |
| ENSG00000174125 | -0.533966 | -0.648321 | 0.7999   | 1 TLR1           | -      |
| ENSG00000178096 | -0.533966 | -0.648321 | 0.7999   | 1 BOLA1          | K05527 |
| ENSG00000178665 | -0.533966 | -0.648321 | 0.7999   | 1 ZNF713         | -      |
| ENSG00000197914 | -0.533966 | -0.648321 | 0.7999   | 1 HIST1H4K       | K11254 |
| ENSG00000198156 | -0.533966 | -0.648321 | 0.7999   | 1 NPIPB6         | K01896 |
| ENSG00000198750 | -0.533966 | -0.648321 | 0.7999   | 1 GATSL2         | -      |
| ENSG00000205143 | -0.533966 | -0.648321 | 0.7999   | 1 ARID3C         | -      |
| ENSG00000214402 | -0.533966 | -0.648321 | 0.7999   | 1 LCNL1          | -      |
| ENSG00000224094 | -0.533966 | -0.648321 | 0.7999   | 1 RPS24P8        | K02974 |
| ENSG00000227256 | -0.533966 | -0.648321 | 0.7999   | 1 MIS18A-AS1     | -      |
| ENSG00000227606 | -0.533966 | -0.648321 | 0.7999   | 1 AC005392.13    | -      |
| ENSG00000232936 | -0.533966 | -0.648321 | 0.7999   | 1 RP11-80H5.2    | -      |
| ENSG00000233325 | -0.533966 | -0.648321 | 0.7999   | 1 MIPEPP3        | K01410 |
| ENSG00000236137 | -0.533966 | -0.648321 | 0.7999   | 1 RP11-27K13.3   | -      |
| ENSG00000237118 | -0.533966 | -0.648321 | 0.7999   | 1 CYP2F2P        | K07416 |
| ENSG00000237522 | -0.533966 | -0.648321 | 0.7999   | 1 NONOP2         | K13214 |
| ENSG00000253608 | -0.533966 | -0.648321 | 0.7999   | 1 RP11-770E5.1   | -      |
| ENSG00000255725 | -0.533966 | -0.648321 | 0.7999   | 1 RP11-443N24.1  | K03649 |
| ENSG00000267342 | -0.533966 | -0.648321 | 0.7999   | 1 RP11-552F3.10  | -      |
| ENSG00000267523 | -0.533966 | -0.648321 | 0.7999   | 1 CTD-2537I9.12  | -      |
| ENSG00000267904 | -0.533966 | -0.648321 | 0.7999   | 1 CTC-429P9.5    | -      |
| ENSG00000269680 | -0.533966 | -0.648321 | 0.7999   | 1 CTD-3128G10.6  | -      |
| ENSG00000269843 | -0.533966 | -0.648321 | 0.7999   | 1 CTC-490E21.10  | -      |
| ENSG00000272195 | -0.533966 | -0.648321 | 0.7999   | 1 RP11-156E8.1   | -      |
| ENSG00000272205 | -0.533966 | -0.648321 | 0.7999   | 1 RP11-277B15.3  | -      |
| ENSG00000272556 | -0.533966 | -0.648321 | 0.7999   | 1 RP11-638I8.1   | -      |
| ENSG00000272960 | -0.533966 | -0.648321 | 0.7999   | 1 RP11-339B21.15 | -      |
| ENSG00000105808 | 0.443254  | -0.810055 | 0.7999   | 1 RASA4          | K17630 |
| ENSG00000127533 | 0.443254  | -0.810055 | 0.7999   | 1 F2RL3          | K04236 |
| ENSG00000135636 | 0.443254  | -0.810055 | 0.7999   | 1 DYSF           | K18261 |
| ENSG00000139656 | 0.443254  | -0.810055 | 0.7999   | 1 SMIM2          | K02889 |
| ENSG00000140986 | 0.443254  | -0.810055 | 0.7999   | 1 RPL3L          | K02925 |
| ENSG00000141505 | 0.443254  | -0.810055 | 0.7999   | 1 ASGR1          | K10063 |
| ENSG00000178150 | 0.443254  | -0.810055 | 0.7999   | 1 ZNF114         | K09228 |
| ENSG00000189149 | 0.443254  | -0.810055 | 0.7999   | 1 CRYM-AS1       | -      |
| ENSG00000204099 | 0.443254  | -0.810055 | 0.7999   | 1 NEU4           | K12357 |
| ENSG00000224165 | 0.443254  | -0.810055 | 0.7999   | 1 DNAJC27-AS1    | -      |
| ENSG00000225022 | 0.443254  | -0.810055 | 0.7999   | 1 UBE2D3P1       | K06689 |
| ENSG00000228060 | 0.443254  | -0.810055 | 0.7999   | 1 RP11-69E11.8   | -      |
| ENSG00000230641 | 0.443254  | -0.810055 | 0.7999   | 1 USP12-AS2      | -      |
| ENSG00000231628 | 0.443254  | -0.810055 | 0.7999   | 1 RP3-355L5.4    | -      |
| ENSG00000231851 | 0.443254  | -0.810055 | 0.7999   | 1 AC104655.2     | -      |
| ENSG00000234297 | 0.443254  | -0.810055 | 0.7999   | 1 RP11-54D18.4   | -      |
| ENSG00000234962 | 0.443254  | -0.810055 | 0.7999   | 1 LINC00700      | -      |



|                 |           |           |          |                    |        |
|-----------------|-----------|-----------|----------|--------------------|--------|
| ENSG00000235398 | 0.443254  | -0.810055 | 0.7999   | 1 LINC00623        | -      |
| ENSG00000235513 | 0.443254  | -0.810055 | 0.7999   | 1 RP4-756G23.5     | -      |
| ENSG00000237748 | 0.443254  | -0.810055 | 0.7999   | 1 UQCRBP1          | K00417 |
| ENSG00000243389 | 0.443254  | -0.810055 | 0.7999   | 1 AC012442.5       | -      |
| ENSG00000243415 | 0.443254  | -0.810055 | 0.7999   | 1 RP11-274H2.2     | -      |
| ENSG00000247950 | 0.443254  | -0.810055 | 0.7999   | 1 SEC24B-AS1       | -      |
| ENSG00000249456 | 0.443254  | -0.810055 | 0.7999   | 1 RP11-298J20.4    | -      |
| ENSG00000251485 | 0.443254  | -0.810055 | 0.7999   | 1 AC068134.10      | K18758 |
| ENSG00000254143 | 0.443254  | -0.810055 | 0.7999   | 1 RP11-470M17.2    | -      |
| ENSG00000258038 | 0.443254  | -0.810055 | 0.7999   | 1 CTD-2384A14.1    | -      |
| ENSG00000260279 | 0.443254  | -0.810055 | 0.7999   | 1 AC137932.5       | -      |
| ENSG00000265500 | 0.443254  | -0.810055 | 0.7999   | 1 SENP3-EIF4A1     | -      |
| ENSG00000266824 | 0.443254  | -0.810055 | 0.7999   | 1 RP11-599B13.7    | -      |
| ENSG00000266930 | 0.443254  | -0.810055 | 0.7999   | 1 CTD-2085J24.4    | -      |
| ENSG00000267160 | 0.443254  | -0.810055 | 0.7999   | 1 RP11-1072C15.4   | -      |
| ENSG00000268179 | 0.443254  | -0.810055 | 0.7999   | 1 AL645608.1       | -      |
| ENSG00000269501 | 0.443254  | -0.810055 | 0.7999   | 1 RP11-353N4.6     | K15258 |
| ENSG00000273261 | 0.443254  | -0.810055 | 0.7999   | 1 RP11-531F16.4    | -      |
| ENSG00000139908 | -0.367345 | -0.735611 | 0.7999   | 1 TSSK4            | K08811 |
| ENSG00000149531 | -0.367345 | -0.735611 | 0.7999   | 1 FRG1B            | K13122 |
| ENSG00000157950 | -0.367345 | -0.735611 | 0.7999   | 1 SSX2B            | K15625 |
| ENSG00000159915 | -0.367345 | -0.735611 | 0.7999   | 1 ZNF233           | K09228 |
| ENSG00000159958 | -0.367345 | -0.735611 | 0.7999   | 1 TNFRSF13C        | K05151 |
| ENSG00000160973 | -0.367345 | -0.735611 | 0.7999   | 1 FOXH1            | K09400 |
| ENSG00000160999 | -0.367345 | -0.735611 | 0.7999   | 1 SH2B2            | K07193 |
| ENSG00000161270 | -0.367345 | -0.735611 | 0.7999   | 1 NPHS1            | -      |
| ENSG00000165757 | -0.367345 | -0.735611 | 0.7999   | 1 KIAA1462         | -      |
| ENSG00000179044 | -0.367345 | -0.735611 | 0.7999   | 1 EXOC3L1          | -      |
| ENSG00000182264 | -0.367345 | -0.735611 | 0.7999   | 1 IZUMO1           | K17985 |
| ENSG00000197210 | -0.367345 | -0.735611 | 0.7999   | 1 KB-1592A4.15     | -      |
| ENSG00000206622 | -0.367345 | -0.735611 | 0.7999   | 1 SNORA69          | -      |
| ENSG00000213793 | -0.367345 | -0.735611 | 0.7999   | 1 ZNF888           | -      |
| ENSG00000213885 | -0.367345 | -0.735611 | 0.7999   | 1 RPL13AP7         | K02872 |
| ENSG00000224358 | -0.367345 | -0.735611 | 0.7999   | 1 RP11-466F5.8     | -      |
| ENSG00000231925 | -0.367345 | -0.735611 | 0.7999   | 1 TAPBP            | K08058 |
| ENSG00000232774 | -0.367345 | -0.735611 | 0.7999   | 1 RP11-47I22.3     | -      |
| ENSG00000234460 | -0.367345 | -0.735611 | 0.7999   | 1 XXyac-YM21GA2.4  | -      |
| ENSG00000236651 | -0.367345 | -0.735611 | 0.7999   | 1 AC104801.1       | -      |
| ENSG00000237101 | -0.367345 | -0.735611 | 0.7999   | 1 RP11-365O16.6    | -      |
| ENSG00000250295 | -0.367345 | -0.735611 | 0.7999   | 1 RP11-434I12.2    | -      |
| ENSG00000250764 | -0.367345 | -0.735611 | 0.7999   | 1 CTD-2152M20.2    | -      |
| ENSG00000253051 | -0.367345 | -0.735611 | 0.7999   | 1 SNORA31          | -      |
| ENSG00000254317 | -0.367345 | -0.735611 | 0.7999   | 1 RP11-473O4.5     | -      |
| ENSG00000258922 | -0.367345 | -0.735611 | 0.7999   | 1 CTD-2313J17.1    | -      |
| ENSG00000259024 | -0.367345 | -0.735611 | 0.7999   | 1 TVP23C-CDRT4     | -      |
| ENSG00000260136 | -0.367345 | -0.735611 | 0.7999   | 1 CTD-2270L9.4     | -      |
| ENSG00000260526 | -0.367345 | -0.735611 | 0.7999   | 1 RP11-73K9.2      | -      |
| ENSG00000261428 | -0.367345 | -0.735611 | 0.7999   | 1 RP11-16P6.1      | -      |
| ENSG00000264647 | -0.367345 | -0.735611 | 0.7999   | 1 RP11-68I3.7      | -      |
| ENSG00000267185 | -0.367345 | -0.735611 | 0.7999   | 1 PTP4A2P1         | K18041 |
| ENSG00000270041 | -0.367345 | -0.735611 | 0.7999   | 1 LL22NC03-N27C7.1 | -      |
| ENSG00000270344 | -0.367345 | -0.735611 | 0.7999   | 1 RP11-734K2.4     | -      |
| ENSG00000271404 | -0.367345 | -0.735611 | 0.7999   | 1 RP11-365F18.5    | -      |
| ENSG00000272153 | -0.367345 | -0.735611 | 0.7999   | 1 RP1-286D6.5      | -      |
| ENSG00000273212 | -0.367345 | -0.735611 | 0.7999   | 1 AC000068.10      | -      |
| ENSG00000128335 | -0.172921 | 5.275838  | 0.799931 | 1 APOL2            | K14480 |
| ENSG00000134470 | -0.177816 | 3.885078  | 0.799951 | 1 IL15RA           | K05074 |
| ENSG00000130713 | -0.168751 | 6.308579  | 0.799952 | 1 EXOSC2           | K03679 |

|                 |           |          |          |                |        |
|-----------------|-----------|----------|----------|----------------|--------|
| ENSG00000076382 | 0.166768  | 7.272777 | 0.800034 | 1 SPAG5        | -      |
| ENSG00000172466 | -0.169331 | 6.150385 | 0.800055 | 1 ZNF24        | K09230 |
| ENSG00000230733 | -0.175708 | 4.152377 | 0.800069 | 1 AC092171.4   | -      |
| ENSG00000072310 | 0.166617  | 7.306162 | 0.800178 | 1 SREBF1       | K07197 |
| ENSG00000163818 | 0.173008  | 4.52577  | 0.800377 | 1 LZTFL1       | K19400 |
| ENSG00000204217 | 0.176283  | 4.270031 | 0.800544 | 1 BMPR2        | K04671 |
| ENSG00000245910 | 0.166411  | 7.170462 | 0.800562 | 1 SNHG6        | -      |
| ENSG00000198625 | -0.169543 | 4.970888 | 0.800572 | 1 MDM4         | K10127 |
| ENSG00000013583 | 0.168577  | 5.866776 | 0.800584 | 1 HEBP1        | -      |
| ENSG00000003402 | -0.171293 | 5.070763 | 0.800698 | 1 CFLAR        | K04724 |
| ENSG00000215012 | 0.16949   | 5.752564 | 0.800738 | 1 C22orf29     | -      |
| ENSG00000198125 | -0.181178 | 3.65046  | 0.800811 | 1 MB           | -      |
| ENSG00000183628 | 0.188694  | 3.247664 | 0.800837 | 1 DGCR6        | K06262 |
| ENSG00000131475 | -0.167815 | 6.186337 | 0.800873 | 1 VPS25        | K08867 |
| ENSG00000106537 | -0.167091 | 6.343    | 0.800896 | 1 TSPAN13      | K17356 |
| ENSG00000167470 | -0.166129 | 6.231365 | 0.800921 | 1 MIDN         | -      |
| ENSG00000113269 | 0.17178   | 5.135157 | 0.800931 | 1 RNF130       | K15701 |
| ENSG00000186298 | -0.165457 | 8.231308 | 0.800942 | 1 PPP1CC       | K06269 |
| ENSG00000198055 | -0.168765 | 5.694141 | 0.800987 | 1 GRK6         | K08291 |
| ENSG00000003509 | -0.169461 | 5.417915 | 0.801069 | 1 NDUFAF7      | K06070 |
| ENSG00000128272 | -0.164887 | 9.575165 | 0.801117 | 1 ATF4         | K04374 |
| ENSG00000133422 | 0.169233  | 5.563192 | 0.8012   | 1 MORC2        | -      |
| ENSG00000197019 | -0.178612 | 4.099694 | 0.801258 | 1 SERTAD1      | K12581 |
| ENSG00000164597 | -0.169717 | 5.444323 | 0.801348 | 1 COG5         | -      |
| ENSG00000144655 | 0.17745   | 3.813676 | 0.801383 | 1 CSRNP1       | K17494 |
| ENSG00000133393 | -0.168785 | 5.14075  | 0.801404 | 1 FOPNL        | K16535 |
| ENSG00000173409 | -0.173439 | 4.905142 | 0.801405 | 1 ARV1         | -      |
| ENSG00000234797 | -0.166509 | 6.584055 | 0.801452 | 1 RPS3AP6      | K02984 |
| ENSG00000173545 | -0.165772 | 7.168949 | 0.801464 | 1 ZNF622       | K14816 |
| ENSG00000224138 | 0.239579  | 1.45868  | 0.801477 | 1 AC000123.4   | -      |
| ENSG00000228274 | 0.239579  | 1.45868  | 0.801477 | 1 RP3-508I15.9 | -      |
| ENSG00000197102 | 0.165008  | 7.966387 | 0.801552 | 1 DYNC1H1      | K10413 |
| ENSG00000101464 | -0.171341 | 4.977863 | 0.801631 | 1 PIGU         | K05293 |
| ENSG00000186432 | -0.16602  | 6.785385 | 0.801693 | 1 KPNA4        | -      |
| ENSG00000075413 | 0.166735  | 6.161035 | 0.801697 | 1 MARK3        | K08798 |
| ENSG00000103160 | -0.170506 | 4.539162 | 0.801811 | 1 HSDL1        | -      |
| ENSG00000182827 | 0.165902  | 6.659167 | 0.801827 | 1 ACBD3        | -      |
| ENSG00000100124 | -0.171926 | 5.048426 | 0.801835 | 1 ANKRD54      | -      |
| ENSG00000114735 | -0.183285 | 3.016193 | 0.801853 | 1 HEMK1        | K02493 |
| ENSG00000005882 | 0.173992  | 4.670656 | 0.801869 | 1 PDK2         | K00898 |
| ENSG00000136816 | -0.16782  | 5.498643 | 0.801876 | 1 TOR1B        | K08857 |
| ENSG00000111110 | -0.167533 | 5.23336  | 0.801909 | 1 PPM1H        | K17503 |
| ENSG00000166483 | -0.165802 | 6.747142 | 0.80201  | 1 WEE1         | K06632 |
| ENSG00000160633 | 0.165115  | 7.212493 | 0.802045 | 1 SAFB         | K05090 |
| ENSG00000186312 | -0.173366 | 4.759043 | 0.802106 | 1 CA5BP1       | K01672 |
| ENSG00000173113 | -0.166119 | 6.452136 | 0.802157 | 1 TRMT112      | K15448 |
| ENSG00000010270 | -0.174991 | 4.284185 | 0.802249 | 1 STARD3NL     | -      |
| ENSG00000198160 | -0.165198 | 6.325627 | 0.802259 | 1 MIER1        | -      |
| ENSG00000185728 | -0.165379 | 6.850252 | 0.80235  | 1 YTHDF3       | -      |
| ENSG00000178307 | 0.16511   | 5.971203 | 0.802386 | 1 TMEM11       | -      |
| ENSG00000134046 | 0.165481  | 6.613728 | 0.802394 | 1 MBD2         | K11590 |
| ENSG00000164898 | 0.185453  | 2.869829 | 0.802502 | 1 C7orf55      | K13212 |
| ENSG00000173905 | 0.165601  | 6.461684 | 0.802508 | 1 GOLIM4       | -      |
| ENSG00000006715 | -0.173656 | 4.800522 | 0.802511 | 1 VPS41        | -      |
| ENSG00000125817 | 0.164846  | 7.073423 | 0.802516 | 1 CENPB        | K11496 |
| ENSG00000115350 | -0.168503 | 4.677451 | 0.802516 | 1 POLE4        | K03506 |
| ENSG00000125743 | -0.16432  | 7.848457 | 0.802533 | 1 SNRPD2       | K11096 |
| ENSG00000119912 | -0.165965 | 5.991411 | 0.802561 | 1 IDE          | K01408 |

|                 |           |          |          |                 |        |
|-----------------|-----------|----------|----------|-----------------|--------|
| ENSG00000111229 | -0.164179 | 7.846746 | 0.802701 | 1 ARPC3         | K05756 |
| ENSG00000164031 | -0.16904  | 5.239175 | 0.802787 | 1 DNAJB14       | K09520 |
| ENSG00000126775 | 0.169635  | 4.341092 | 0.802799 | 1 ATG14         | K17889 |
| ENSG00000188185 | -0.281561 | 1.073177 | 0.802807 | 1 LINC00265     | -      |
| ENSG00000234764 | -0.281561 | 1.073177 | 0.802807 | 1 AC008132.12   | K09390 |
| ENSG00000273203 | -0.281561 | 1.073177 | 0.802807 | 1 AC006946.16   | -      |
| ENSG00000171658 | 0.266942  | 1.035582 | 0.802807 | 1 RP11-443P15.2 | -      |
| ENSG00000224888 | 0.266942  | 1.035582 | 0.802807 | 1 RP5-1142A6.2  | -      |
| ENSG00000184100 | -0.239944 | 1.049262 | 0.802807 | 1 BRD7P2        | K11723 |
| ENSG00000245317 | -0.239944 | 1.049262 | 0.802807 | 1 CTC-241N9.1   | -      |
| ENSG00000005889 | 0.165252  | 5.707076 | 0.802904 | 1 ZFX           | -      |
| ENSG00000144567 | 0.165045  | 6.109203 | 0.802952 | 1 FAM134A       | -      |
| ENSG00000172890 | 0.16568   | 5.118841 | 0.802975 | 1 NADSYN1       | K01950 |
| ENSG00000138674 | 0.16413   | 7.443095 | 0.802983 | 1 SEC31A        | K14005 |
| ENSG00000198899 | 0.163082  | 11.09586 | 0.80303  | 1 MT-ATP6       | K02126 |
| ENSG00000213740 | -0.166294 | 5.791508 | 0.803078 | 1 SERBP1P1      | K13199 |
| ENSG00000075391 | -0.167735 | 4.883016 | 0.803255 | 1 RASAL2        | K17633 |
| ENSG00000132842 | -0.165182 | 6.451638 | 0.803261 | 1 AP3B1         | K12397 |
| ENSG00000165675 | -0.174253 | 3.908576 | 0.803271 | 1 ENOX2         | -      |
| ENSG00000130703 | 0.164704  | 5.507357 | 0.803336 | 1 OSBPL2        | -      |
| ENSG00000214160 | 0.164161  | 7.058681 | 0.80334  | 1 ALG3          | K03845 |
| ENSG00000163132 | 0.173598  | 4.63754  | 0.803399 | 1 MSX1          | K09341 |
| ENSG00000231312 | -0.235177 | 2.123048 | 0.803434 | 1 AC007246.3    | -      |
| ENSG00000130827 | -0.215855 | 2.112113 | 0.803434 | 1 PLXNA3        | K06820 |
| ENSG00000155592 | 0.208288  | 2.093783 | 0.803434 | 1 ZKSCAN2       | K09229 |
| ENSG00000263272 | 0.208288  | 2.093783 | 0.803434 | 1 CTC-524C5.2   | -      |
| ENSG00000197162 | 0.185978  | 2.10498  | 0.803434 | 1 ZNF785        | K09228 |
| ENSG00000198373 | -0.170164 | 4.050198 | 0.80353  | 1 WWP2          | K05630 |
| ENSG00000070423 | 0.164738  | 6.437072 | 0.803567 | 1 RNF126        | K11982 |
| ENSG00000116199 | -0.164897 | 6.45364  | 0.803591 | 1 FAM20B        | -      |
| ENSG00000164096 | 0.169927  | 4.920079 | 0.803597 | 1 C4orf3        | -      |
| ENSG00000179820 | -0.166165 | 6.349467 | 0.803621 | 1 MYADM         | -      |
| ENSG00000143374 | -0.166409 | 6.162067 | 0.80363  | 1 TARS2         | K01868 |
| ENSG00000196262 | 0.162599  | 10.5685  | 0.803646 | 1 PPIA          | K03767 |
| ENSG00000167862 | -0.16784  | 5.385782 | 0.80368  | 1 ICT1          | K15033 |
| ENSG00000155363 | 0.163815  | 7.055054 | 0.803752 | 1 MOV10         | -      |
| ENSG00000179627 | 0.181383  | 3.023453 | 0.803841 | 1 ZBTB42        | -      |
| ENSG00000076944 | -0.168132 | 5.41278  | 0.803915 | 1 STXBP2        | K15300 |
| ENSG00000008083 | -0.166432 | 5.674542 | 0.804105 | 1 JARID2        | K11478 |
| ENSG00000269378 | 0.164372  | 5.717122 | 0.804162 | 1 ITGB1P1       | K05719 |
| ENSG00000105968 | 0.163126  | 7.401382 | 0.804205 | 1 H2AFV         | K11251 |
| ENSG00000204899 | -0.164051 | 6.651874 | 0.804228 | 1 MZT1          | K18633 |
| ENSG00000248873 | -0.41686  | 0.43029  | 0.804303 | 1 SERBP1P6      | K13199 |
| ENSG00000268402 | -0.41686  | 0.43029  | 0.804303 | 1 AL031320.1    | -      |
| ENSG00000075043 | -0.350267 | 0.391604 | 0.804303 | 1 KCNQ2         | K04927 |
| ENSG00000155066 | -0.350267 | 0.391604 | 0.804303 | 1 PROM2         | K15602 |
| ENSG00000197463 | -0.350267 | 0.391604 | 0.804303 | 1 CSAG3         | -      |
| ENSG00000254978 | -0.350267 | 0.391604 | 0.804303 | 1 ALG1L9P       | K03842 |
| ENSG00000256591 | -0.350267 | 0.391604 | 0.804303 | 1 RP11-286N22.8 | K17571 |
| ENSG00000100376 | 0.170046  | 4.598239 | 0.80433  | 1 FAM118A       | K12581 |
| ENSG00000177666 | 0.164033  | 6.445152 | 0.804383 | 1 PNPLA2        | K16816 |
| ENSG00000108349 | 0.164586  | 6.226381 | 0.804389 | 1 CASC3         | K14323 |
| ENSG00000184916 | -0.164672 | 6.257953 | 0.804422 | 1 JAG2          | K06052 |
| ENSG00000061676 | -0.162883 | 7.565807 | 0.804461 | 1 NCKAP1        | K05750 |
| ENSG00000105771 | 0.16749   | 5.098486 | 0.80459  | 1 SMG9          | K18735 |
| ENSG00000134574 | -0.16657  | 6.006485 | 0.804626 | 1 DDB2          | K10140 |
| ENSG00000157110 | 0.177558  | 3.676276 | 0.804673 | 1 RBPMS         | -      |
| ENSG00000214174 | 0.195701  | 2.887438 | 0.804673 | 1 AMZ2P1        | K06974 |

|                 |           |          |          |                |        |
|-----------------|-----------|----------|----------|----------------|--------|
| ENSG00000214595 | -0.190729 | 2.897808 | 0.804673 | 1 EML6         | -      |
| ENSG00000212802 | 0.164179  | 6.244438 | 0.804731 | 1 RPL15P3      | K02877 |
| ENSG00000168116 | -0.176496 | 4.304301 | 0.804754 | 1 KIAA1586     | -      |
| ENSG00000009307 | 0.161803  | 9.377854 | 0.804779 | 1 CSDE1        | -      |
| ENSG00000164663 | -0.177657 | 3.845984 | 0.804825 | 1 USP49        | K11834 |
| ENSG00000136908 | 0.163665  | 6.414093 | 0.804871 | 1 DPM2         | K09658 |
| ENSG00000136143 | 0.163422  | 6.574655 | 0.804882 | 1 SUCLA2       | K01900 |
| ENSG00000176896 | 0.217203  | 1.835765 | 0.804884 | 1 TCEANC       | K11341 |
| ENSG00000261788 | 0.217203  | 1.835765 | 0.804884 | 1 RP11-480G7.1 | -      |
| ENSG00000119681 | -0.190863 | 1.855902 | 0.804884 | 1 LTBP2        | K08023 |
| ENSG00000168395 | -0.173067 | 3.99357  | 0.804947 | 1 ING5         | K11345 |
| ENSG00000162298 | 0.16745   | 5.312395 | 0.804992 | 1 SYVN1        | K10601 |
| ENSG00000112210 | -0.1693   | 4.127455 | 0.805046 | 1 RAB23        | K06234 |
| ENSG00000169641 | 0.165368  | 5.521758 | 0.805131 | 1 LUZP1        | -      |
| ENSG00000169756 | -0.163054 | 5.661616 | 0.805214 | 1 LIMS1        | K17985 |
| ENSG00000173442 | 0.161837  | 8.038754 | 0.805254 | 1 EHBPI1L1     | -      |
| ENSG00000185418 | 0.173447  | 4.56152  | 0.80531  | 1 TARSL2       | K01868 |
| ENSG00000184076 | 0.164193  | 6.334752 | 0.805416 | 1 UQCR10       | K00419 |
| ENSG00000125249 | -0.167071 | 4.823895 | 0.805431 | 1 RAP2A        | K07837 |
| ENSG00000180581 | 0.197947  | 2.34763  | 0.805445 | 1 SRP9P1       | K03109 |
| ENSG00000229180 | 0.197947  | 2.34763  | 0.805445 | 1 GS1-124K5.11 | -      |
| ENSG00000136754 | 0.166625  | 5.571521 | 0.805504 | 1 ABI1         | -      |
| ENSG00000105928 | -0.162993 | 6.63434  | 0.805505 | 1 DFNA5        | K18047 |
| ENSG00000143106 | -0.161524 | 8.161112 | 0.805628 | 1 PSMA5        | K02729 |
| ENSG00000143303 | -0.171898 | 4.701247 | 0.805689 | 1 RRNAD1       | -      |
| ENSG00000150938 | -0.161699 | 7.766316 | 0.80569  | 1 CRIM1        | -      |
| ENSG00000074657 | 0.167693  | 5.007273 | 0.805757 | 1 ZNF532       | -      |
| ENSG00000120256 | 0.162057  | 7.105636 | 0.805768 | 1 LRP11        | -      |
| ENSG00000229212 | 0.190637  | 3.039319 | 0.805791 | 1 RP11-561C5.4 | -      |
| ENSG00000188636 | -0.164772 | 5.710137 | 0.805863 | 1 LDOC1L       | -      |
| ENSG00000122386 | 0.16641   | 4.469477 | 0.805991 | 1 ZNF205       | K09228 |
| ENSG00000184402 | 0.170652  | 4.742928 | 0.806002 | 1 SS18L1       | -      |
| ENSG00000145911 | -0.163855 | 5.175111 | 0.806012 | 1 N4BP3        | -      |
| ENSG00000178449 | 0.163562  | 6.224619 | 0.806022 | 1 COX14        | K18181 |
| ENSG00000164346 | -0.161966 | 7.088821 | 0.80605  | 1 NSA2         | K14842 |
| ENSG00000160867 | -0.164893 | 5.834383 | 0.806163 | 1 FGFR4        | K05095 |
| ENSG00000166450 | -0.166654 | 4.869583 | 0.806283 | 1 PRTG         | -      |
| ENSG00000123124 | 0.162666  | 6.327115 | 0.806327 | 1 WWP1         | K05633 |
| ENSG00000240857 | -0.172744 | 4.524016 | 0.806346 | 1 RDH14        | K11162 |
| ENSG00000108506 | -0.172011 | 4.073834 | 0.806447 | 1 INTS2        | K13139 |
| ENSG00000111912 | 0.162038  | 6.611922 | 0.806453 | 1 NCOA7        | K17985 |
| ENSG00000224470 | 0.165631  | 5.175802 | 0.806461 | 1 ATXN1L       | -      |
| ENSG00000062725 | -0.1671   | 4.908044 | 0.806547 | 1 APPBP2       | -      |
| ENSG00000100038 | 0.165372  | 4.905524 | 0.806547 | 1 TOP3B        | K03165 |
| ENSG00000141627 | 0.165372  | 4.905524 | 0.806547 | 1 DYM          | -      |
| ENSG00000169221 | 0.163627  | 5.380354 | 0.806601 | 1 TBC1D10B     | K11447 |
| ENSG00000126243 | 0.181821  | 3.401013 | 0.806635 | 1 LRFN3        | -      |
| ENSG00000205707 | 0.164337  | 4.662062 | 0.806638 | 1 LYRM5        | -      |
| ENSG00000147854 | 0.163156  | 6.229305 | 0.806674 | 1 UHRF2        | K15713 |
| ENSG00000177888 | -0.170249 | 4.375664 | 0.806767 | 1 ZBTB41       | K10513 |
| ENSG00000101294 | 0.161191  | 7.115794 | 0.806779 | 1 HM13         | K09595 |
| ENSG00000089123 | -0.175899 | 2.914968 | 0.806798 | 1 TASP1        | K08657 |
| ENSG00000118263 | -0.25296  | 1.53378  | 0.806915 | 1 KLF7         | K09207 |
| ENSG00000170469 | 0.230664  | 1.521426 | 0.806915 | 1 SPATA24      | -      |
| ENSG00000151929 | 0.161816  | 6.482436 | 0.806929 | 1 BAG3         | K09557 |
| ENSG00000109586 | -0.161659 | 6.723715 | 0.806929 | 1 GALNT7       | K00710 |
| ENSG00000188603 | -0.176578 | 4.007301 | 0.806964 | 1 CLN3         | K12389 |
| ENSG00000163902 | 0.159986  | 9.132891 | 0.80699  | 1 RPN1         | K12666 |

|                 |           |          |          |                  |        |
|-----------------|-----------|----------|----------|------------------|--------|
| ENSG00000171700 | 0.168997  | 4.527698 | 0.807046 | 1 RGS19          | K16449 |
| ENSG00000175324 | -0.163528 | 4.912406 | 0.807086 | 1 LSM1           | K12620 |
| ENSG00000100350 | -0.165302 | 4.836215 | 0.807141 | 1 FOXRED2        | -      |
| ENSG00000141646 | -0.165911 | 5.538789 | 0.807244 | 1 SMAD4          | K04501 |
| ENSG00000031003 | 0.16672   | 5.018151 | 0.80726  | 1 FAM13B         | -      |
| ENSG00000120029 | 0.16672   | 5.018151 | 0.80726  | 1 C10orf76       | -      |
| ENSG00000198793 | -0.163046 | 5.698371 | 0.807274 | 1 MTOR           | K07203 |
| ENSG00000214941 | -0.171334 | 3.518807 | 0.807302 | 1 ZSWIM7         | K18169 |
| ENSG00000090905 | -0.168598 | 4.877066 | 0.807388 | 1 TNRC6A         | K18412 |
| ENSG00000171735 | -0.165436 | 5.056335 | 0.807475 | 1 CAMTA1         | -      |
| ENSG00000134453 | -0.160797 | 7.025989 | 0.807509 | 1 RBM17          | K12840 |
| ENSG00000124496 | -0.169123 | 3.943124 | 0.80753  | 1 TRERF1         | -      |
| ENSG00000196323 | -0.167126 | 4.987554 | 0.807544 | 1 ZBTB44         | K10515 |
| ENSG00000101084 | 0.160918  | 6.726595 | 0.8076   | 1 C20orf24       | -      |
| ENSG00000100554 | 0.162166  | 6.113006 | 0.807671 | 1 ATP6V1D        | K02149 |
| ENSG00000158941 | -0.162075 | 5.959379 | 0.807725 | 1 CCAR2          | -      |
| ENSG00000146842 | -0.165677 | 5.566796 | 0.807736 | 1 TMEM209        | K09654 |
| ENSG00000136997 | -0.159455 | 8.834589 | 0.807757 | 1 MYC            | K04377 |
| ENSG00000133121 | -0.199609 | 2.768854 | 0.80801  | 1 STARD13        | -      |
| ENSG00000151689 | -0.199609 | 2.768854 | 0.80801  | 1 INPP1          | K01107 |
| ENSG00000121022 | -0.160083 | 7.235044 | 0.8081   | 1 COPS5          | K09613 |
| ENSG00000198898 | 0.159754  | 7.476726 | 0.80812  | 1 CAPZA2         | K10364 |
| ENSG00000175782 | 0.180172  | 3.417561 | 0.808126 | 1 SLC35E3        | K15285 |
| ENSG00000112893 | -0.162735 | 5.944512 | 0.80814  | 1 MAN2A1         | K01231 |
| ENSG00000162441 | -0.173999 | 3.870121 | 0.808151 | 1 LZIC           | -      |
| ENSG00000101213 | -0.16543  | 4.91967  | 0.808153 | 1 PTK6           | K08894 |
| ENSG00000168067 | 0.165015  | 4.485247 | 0.808157 | 1 MAP4K2         | K04414 |
| ENSG00000068793 | 0.159927  | 7.203564 | 0.808177 | 1 CYFIP1         | K05749 |
| ENSG00000167196 | -0.162253 | 6.084122 | 0.808186 | 1 FBXO22         | K10302 |
| ENSG00000163516 | 0.16402   | 5.470218 | 0.808218 | 1 ANKZF1         | -      |
| ENSG00000172572 | 0.160777  | 6.257109 | 0.808263 | 1 PDE3A          | K19021 |
| ENSG00000147130 | -0.160101 | 5.890134 | 0.808358 | 1 ZMYM3          | K06641 |
| ENSG00000231770 | -0.204642 | 2.388133 | 0.808448 | 1 TMEM44-AS1     | -      |
| ENSG00000163795 | 0.194137  | 2.381805 | 0.808448 | 1 ZNF513         | K09228 |
| ENSG00000171444 | 0.194137  | 2.381805 | 0.808448 | 1 MCC            | -      |
| ENSG00000163754 | -0.160856 | 5.312681 | 0.808472 | 1 GYG1           | K00750 |
| ENSG00000183751 | -0.160663 | 6.440595 | 0.808603 | 1 TBL3           | K14555 |
| ENSG00000260336 | 0.163057  | 5.548261 | 0.808627 | 1 RP11-395B7.7   | -      |
| ENSG00000125107 | 0.159333  | 7.378071 | 0.808706 | 1 CNOT1          | K12604 |
| ENSG00000143727 | 0.159675  | 6.984352 | 0.808722 | 1 ACP1           | K14394 |
| ENSG00000128590 | 0.17043   | 4.332399 | 0.808792 | 1 DNAJB9         | K09515 |
| ENSG00000102908 | -0.165252 | 4.49511  | 0.808868 | 1 NFAT5          | K17335 |
| ENSG00000170464 | 0.180645  | 2.91717  | 0.808878 | 1 DNAJC18        | K09538 |
| ENSG00000138821 | -0.160147 | 6.30639  | 0.808911 | 1 SLC39A8        | K14714 |
| ENSG00000272405 | -0.163941 | 5.06683  | 0.808918 | 1 RP11-284F21.10 | -      |
| ENSG00000143382 | -0.159085 | 7.500775 | 0.809007 | 1 ADAMTSL4       | -      |
| ENSG00000155463 | 0.159262  | 7.100835 | 0.809074 | 1 OXA1L          | K03217 |
| ENSG00000068394 | 0.237499  | 1.871083 | 0.809098 | 1 GPKOW          | K13101 |
| ENSG00000267855 | 0.237499  | 1.871083 | 0.809098 | 1 NDUFA7         | K03951 |
| ENSG00000123643 | 0.211109  | 1.884288 | 0.809098 | 1 SLC36A1        | K14209 |
| ENSG00000205609 | 0.166135  | 4.680996 | 0.809154 | 1 EIF3CL         | K03252 |
| ENSG00000126883 | 0.163466  | 5.668764 | 0.80922  | 1 NUP214         | K14317 |
| ENSG0000010292  | 0.158521  | 7.807335 | 0.809322 | 1 NCAPD2         | K06677 |
| ENSG00000163590 | 0.162022  | 4.728139 | 0.809365 | 1 PPM1L          | K17506 |
| ENSG00000198176 | -0.158635 | 7.68007  | 0.809381 | 1 TFDPI          | K04683 |
| ENSG00000151366 | -0.164289 | 4.968076 | 0.809387 | 1 NDUFC2         | K03968 |
| ENSG00000149136 | -0.158045 | 8.815173 | 0.809432 | 1 SSRP1          | K09272 |
| ENSG00000117408 | -0.16606  | 5.106809 | 0.809552 | 1 IPO13          | -      |

|                 |           |          |          |                 |        |
|-----------------|-----------|----------|----------|-----------------|--------|
| ENSG00000196812 | 0.177175  | 3.066073 | 0.809577 | 1 ZSCAN16       | K09230 |
| ENSG00000185753 | 0.173667  | 3.71694  | 0.809596 | 1 CXorf38       | K17985 |
| ENSG00000119718 | 0.16244   | 5.319011 | 0.809678 | 1 EIF2B2        | K03754 |
| ENSG00000132507 | -0.157647 | 9.23547  | 0.809767 | 1 EIF5A         | K03263 |
| ENSG00000011523 | -0.163337 | 4.689366 | 0.809773 | 1 CEP68         | K16764 |
| ENSG00000134153 | 0.159016  | 6.758961 | 0.809797 | 1 EMC7          | -      |
| ENSG00000104783 | 0.160525  | 5.992031 | 0.809862 | 1 KCNN4         | K04945 |
| ENSG00000123066 | 0.160525  | 5.992031 | 0.809862 | 1 MED13L        | K15164 |
| ENSG00000172269 | -0.160028 | 5.606917 | 0.809865 | 1 DPAGT1        | K01001 |
| ENSG00000087365 | 0.157798  | 8.321404 | 0.80988  | 1 SF3B2         | K12829 |
| ENSG00000134107 | -0.159052 | 6.736522 | 0.809984 | 1 BHLHE40       | K03729 |
| ENSG00000244187 | -0.16143  | 5.008113 | 0.810052 | 1 TMEM141       | -      |
| ENSG00000213347 | 0.164327  | 4.447534 | 0.81006  | 1 MXD3          | K07912 |
| ENSG00000115170 | -0.174336 | 3.208532 | 0.810152 | 1 ACVR1         | K04675 |
| ENSG00000178585 | -0.174336 | 3.208532 | 0.810152 | 1 CTNNBIP1      | K04493 |
| ENSG00000066322 | -0.158867 | 6.331643 | 0.810382 | 1 ELOVL1        | K10247 |
| ENSG00000104936 | -0.160283 | 6.1349   | 0.810436 | 1 DMPK          | K08788 |
| ENSG00000168566 | -0.158946 | 6.538136 | 0.810445 | 1 SNRNP48       | K13156 |
| ENSG00000130045 | 0.220198  | 2.16337  | 0.810446 | 1 NXNL2         | K17609 |
| ENSG00000198888 | 0.156802  | 10.52253 | 0.810517 | 1 MT-ND1        | K03878 |
| ENSG00000183779 | 0.164324  | 4.400518 | 0.81058  | 1 ZNF703        | -      |
| ENSG00000175854 | -0.162292 | 5.27016  | 0.810651 | 1 SWI5          | -      |
| ENSG00000006114 | -0.160998 | 4.605424 | 0.810661 | 1 SYNRG         | -      |
| ENSG00000138698 | -0.163601 | 4.781486 | 0.810723 | 1 RAP1GDS1      | -      |
| ENSG00000088986 | -0.157384 | 7.848875 | 0.81073  | 1 DYNLL1        | K10418 |
| ENSG00000140743 | 0.160546  | 5.907548 | 0.810773 | 1 CDR2          | -      |
| ENSG00000163938 | -0.157482 | 7.637573 | 0.81078  | 1 GNL3          | K14538 |
| ENSG00000049167 | -0.162636 | 3.728336 | 0.810789 | 1 ERCC8         | K10570 |
| ENSG00000132341 | -0.156601 | 9.718025 | 0.810892 | 1 RAN           | K07936 |
| ENSG00000172009 | -0.157472 | 7.307945 | 0.811106 | 1 THOP1         | K01392 |
| ENSG00000173207 | -0.157298 | 7.433928 | 0.811183 | 1 CKS1B         | K02219 |
| ENSG00000021776 | -0.16159  | 5.444321 | 0.811257 | 1 AQR           | K12874 |
| ENSG00000117133 | -0.15819  | 6.577675 | 0.811267 | 1 RPF1          | K14846 |
| ENSG00000214367 | -0.162702 | 4.787843 | 0.811297 | 1 HAUS3         | K16586 |
| ENSG00000106462 | 0.158103  | 6.455672 | 0.811354 | 1 EZH2          | K11430 |
| ENSG00000247228 | 0.190505  | 2.415185 | 0.81136  | 1 RP11-296I10.3 | -      |
| ENSG00000143578 | -0.170463 | 3.893862 | 0.811366 | 1 CREB3L4       | K09048 |
| ENSG00000137575 | -0.156793 | 7.910829 | 0.811386 | 1 SDCBP         | K17254 |
| ENSG00000176401 | 0.186204  | 3.081486 | 0.811415 | 1 EID2B         | K17985 |
| ENSG00000185480 | -0.159284 | 5.896035 | 0.811504 | 1 PARPBP        | -      |
| ENSG00000165119 | -0.156149 | 9.084877 | 0.811587 | 1 HNRNPK        | K12886 |
| ENSG00000163820 | 0.163311  | 3.967613 | 0.81161  | 1 FYCO1         | -      |
| ENSG00000107821 | -0.160065 | 5.219302 | 0.811695 | 1 KAZALD1       | -      |
| ENSG00000140548 | 0.166744  | 3.641704 | 0.811699 | 1 ZNF710        | -      |
| ENSG00000132467 | -0.159382 | 5.81817  | 0.811803 | 1 UTP3          | K14767 |
| ENSG00000226419 | -0.171506 | 3.227323 | 0.811828 | 1 SLC16A1-AS1   | -      |
| ENSG00000260054 | -0.165166 | 4.047498 | 0.81183  | 1 RP11-611L7.1  | -      |
| ENSG00000010318 | -0.211899 | 1.576439 | 0.812063 | 1 PHF7          | -      |
| ENSG00000092445 | 0.158943  | 5.818585 | 0.812083 | 1 TYRO3         | K05116 |
| ENSG00000119408 | 0.160665  | 5.056916 | 0.812111 | 1 NEK6          | K08857 |
| ENSG00000181827 | -0.160491 | 4.709594 | 0.812209 | 1 RFX7          | -      |
| ENSG00000077097 | -0.156597 | 7.22191  | 0.812235 | 1 TOP2B         | K03164 |
| ENSG00000141873 | -0.158604 | 5.800981 | 0.812309 | 1 SLC39A3       | K14709 |
| ENSG00000160113 | -0.155957 | 7.977555 | 0.81233  | 1 NR2F6         | K08549 |
| ENSG00000117479 | 0.158571  | 5.312403 | 0.81236  | 1 SLC19A2       | K14610 |
| ENSG00000137076 | 0.156292  | 7.30999  | 0.812368 | 1 TLN1          | K06271 |
| ENSG00000255737 | 0.168483  | 3.454256 | 0.812467 | 1 AGAP2-AS1     | K17848 |
| ENSG00000198832 | 0.157166  | 6.442609 | 0.812483 | 1 SELM          | -      |

|                 |           |          |          |                 |        |
|-----------------|-----------|----------|----------|-----------------|--------|
| ENSG00000250182 | 0.193308  | 2.795758 | 0.812517 | 1 EEF1A1P13     | K03231 |
| ENSG00000241945 | -0.157031 | 6.545199 | 0.812692 | 1 PWP2          | K14558 |
| ENSG00000184939 | -0.179724 | 2.966473 | 0.812907 | 1 ZFP90         | K09228 |
| ENSG00000119711 | -0.164565 | 4.1249   | 0.812929 | 1 ALDH6A1       | K00140 |
| ENSG00000165055 | -0.158765 | 5.228681 | 0.81296  | 1 METTL2B       | K17985 |
| ENSG00000100601 | 0.165157  | 4.18583  | 0.813069 | 1 ALKBH1        | K10765 |
| ENSG00000101104 | -0.161553 | 4.840797 | 0.813086 | 1 PABPC1L       | K13126 |
| ENSG00000170631 | 0.171192  | 3.743425 | 0.81313  | 1 ZNF16         | K09228 |
| ENSG00000139168 | -0.156427 | 6.662756 | 0.813203 | 1 ZCRB1         | K13154 |
| ENSG00000061936 | 0.157992  | 5.848597 | 0.813237 | 1 SFSWAP        | -      |
| ENSG00000162869 | -0.189189 | 3.237024 | 0.813475 | 1 PPP1R21       | K17562 |
| ENSG00000260539 | 0.162178  | 4.425254 | 0.813524 | 1 RP11-252A24.7 | -      |
| ENSG00000065243 | -0.155516 | 7.203598 | 0.813533 | 1 PKN2          | K06071 |
| ENSG00000160075 | -0.156085 | 6.658859 | 0.813613 | 1 SSU72         | K15544 |
| ENSG00000135775 | -0.157981 | 5.380527 | 0.81364  | 1 COG2          | -      |
| ENSG00000177352 | 0.164997  | 4.529623 | 0.813704 | 1 CCDC71        | -      |
| ENSG00000115415 | -0.156379 | 6.412073 | 0.813712 | 1 STAT1         | K11220 |
| ENSG00000126934 | 0.15481   | 7.719047 | 0.813778 | 1 MAP2K2        | K04369 |
| ENSG00000106682 | -0.170892 | 3.4682   | 0.81387  | 1 EIF4H         | -      |
| ENSG00000163166 | 0.155007  | 7.305274 | 0.813892 | 1 IWS1          | K17498 |
| ENSG00000126787 | -0.155647 | 6.808677 | 0.813895 | 1 DLGAP5        | K16804 |
| ENSG00000136877 | -0.156288 | 6.301964 | 0.813995 | 1 FPGS          | K01930 |
| ENSG00000205726 | 0.157211  | 6.095772 | 0.814133 | 1 ITSN1         | -      |
| ENSG00000120253 | -0.158709 | 5.493789 | 0.814163 | 1 NUP43         | K14305 |
| ENSG00000048028 | 0.158009  | 5.517931 | 0.814197 | 1 USP28         | K11849 |
| ENSG00000100767 | -0.160484 | 4.891876 | 0.814223 | 1 PAPLN         | K12581 |
| ENSG00000167553 | -0.153862 | 9.326223 | 0.81423  | 1 TUBA1C        | K07374 |
| ENSG00000005206 | 0.157749  | 5.795063 | 0.814244 | 1 SPPL2B        | -      |
| ENSG00000141380 | -0.155445 | 6.707896 | 0.814289 | 1 SS18          | K15623 |
| ENSG00000168159 | -0.155843 | 6.400709 | 0.814367 | 1 RNF187        | K15709 |
| ENSG00000159352 | -0.154393 | 7.686063 | 0.814398 | 1 PSMD4         | K03029 |
| ENSG00000170881 | -0.162468 | 5.077249 | 0.814446 | 1 RNF139        | K15703 |
| ENSG00000173418 | -0.157856 | 5.840524 | 0.814569 | 1 NAA20         | K17972 |
| ENSG00000108256 | 0.153774  | 8.479992 | 0.814576 | 1 NUFIP2        | K06115 |
| ENSG00000170100 | -0.191143 | 2.819209 | 0.814693 | 1 ZNF778        | K09228 |
| ENSG00000119487 | 0.156341  | 5.975378 | 0.814704 | 1 MAPKAP1       | -      |
| ENSG00000088766 | 0.154866  | 5.689316 | 0.814706 | 1 CRLS1         | K08744 |
| ENSG00000136485 | 0.155193  | 6.491223 | 0.814728 | 1 DCAF7         | K11805 |
| ENSG00000137266 | 0.158698  | 4.261049 | 0.81482  | 1 SLC22A23      | K08215 |
| ENSG00000198646 | 0.156064  | 5.470219 | 0.814833 | 1 NCOA6         | -      |
| ENSG00000145107 | -0.312214 | 0.518168 | 0.814851 | 1 TM4SF19       | -      |
| ENSG00000224817 | -0.312214 | 0.518168 | 0.814851 | 1 RP11-190J1.3  | -      |
| ENSG00000251144 | -0.312214 | 0.518168 | 0.814851 | 1 CTD-2532K18.2 | -      |
| ENSG00000161664 | 0.248359  | 0.472995 | 0.814851 | 1 ASB16         | K10338 |
| ENSG00000168256 | 0.248359  | 0.472995 | 0.814851 | 1 NKIRAS2       | K17197 |
| ENSG00000187990 | 0.248359  | 0.472995 | 0.814851 | 1 HIST1H2BG     | K11252 |
| ENSG00000197021 | 0.248359  | 0.472995 | 0.814851 | 1 CXorf40B      | -      |
| ENSG00000233225 | 0.248359  | 0.472995 | 0.814851 | 1 AC004987.9    | -      |
| ENSG00000188677 | -0.158173 | 5.497674 | 0.814855 | 1 PARVB         | K06275 |
| ENSG00000143434 | 0.176144  | 2.963001 | 0.814858 | 1 SEMA6C        | K06842 |
| ENSG00000028839 | -0.165061 | 4.381947 | 0.814919 | 1 TBPL1         | K03120 |
| ENSG00000113552 | -0.157023 | 6.016016 | 0.814979 | 1 GNPDA1        | K02564 |
| ENSG00000136003 | -0.155282 | 6.404854 | 0.815022 | 1 ISCU          | -      |
| ENSG00000138600 | 0.158034  | 5.446261 | 0.815166 | 1 SPPL2A        | K09596 |
| ENSG00000075218 | 0.15593   | 5.447268 | 0.815166 | 1 GTSE1         | K10129 |
| ENSG00000100304 | -0.15407  | 7.257872 | 0.815185 | 1 TTLL12        | K16609 |
| ENSG00000205352 | -0.153545 | 7.739337 | 0.815359 | 1 PRR13         | -      |
| ENSG00000185236 | -0.154786 | 6.091227 | 0.815489 | 1 RAB11B        | K07905 |

|                 |           |          |          |                 |        |
|-----------------|-----------|----------|----------|-----------------|--------|
| ENSG00000165355 | -0.165375 | 3.928761 | 0.815491 | 1 FBXO33        | K10310 |
| ENSG00000139437 | -0.167143 | 4.210275 | 0.8156   | 1 TCHP          | K16811 |
| ENSG00000137185 | -0.162011 | 4.59821  | 0.815716 | 1 ZSCAN9        | K09230 |
| ENSG00000147669 | -0.154067 | 6.837709 | 0.81572  | 1 POLR2K        | K03009 |
| ENSG00000156502 | -0.154755 | 6.361808 | 0.81573  | 1 SUPV3L1       | K17675 |
| ENSG00000115020 | -0.157753 | 5.253019 | 0.815847 | 1 PIKFYVE       | K00921 |
| ENSG00000160877 | -0.153202 | 7.387591 | 0.816077 | 1 NACC1         | K10486 |
| ENSG00000054267 | 0.154772  | 5.534122 | 0.81622  | 1 ARID4B        | K19195 |
| ENSG00000116584 | -0.154156 | 6.458666 | 0.816247 | 1 ARHGEF2       | K12791 |
| ENSG00000106153 | -0.152109 | 9.14342  | 0.816361 | 1 CHCHD2        | K00901 |
| ENSG00000165424 | 0.162655  | 4.214499 | 0.816428 | 1 ZCCHC24       | -      |
| ENSG00000170275 | 0.152231  | 8.406999 | 0.816439 | 1 CRTAP         | K19606 |
| ENSG00000124570 | 0.152044  | 8.611807 | 0.816575 | 1 SERPINB6      | K13963 |
| ENSG00000196876 | -0.262382 | 1.153501 | 0.816583 | 1 SCN8A         | -      |
| ENSG00000214900 | -0.262382 | 1.153501 | 0.816583 | 1 C14orf182     | K02927 |
| ENSG00000137709 | 0.253341  | 1.119146 | 0.816583 | 1 POU2F3        | K09364 |
| ENSG00000150527 | 0.253341  | 1.119146 | 0.816583 | 1 CTAGE5        | -      |
| ENSG00000155666 | 0.253341  | 1.119146 | 0.816583 | 1 KDM8          | K10277 |
| ENSG00000173540 | 0.253341  | 1.119146 | 0.816583 | 1 GMPPB         | K00966 |
| ENSG00000250903 | 0.253341  | 1.119146 | 0.816583 | 1 GMDS-AS1      | -      |
| ENSG00000255031 | 0.253341  | 1.119146 | 0.816583 | 1 RP11-802E16.3 | -      |
| ENSG00000180611 | -0.175979 | 3.487959 | 0.816616 | 1 MB21D2        | -      |
| ENSG00000001630 | -0.166064 | 3.264189 | 0.816685 | 1 CYP51A1       | K05917 |
| ENSG00000161800 | 0.152505  | 7.493348 | 0.816686 | 1 RACGAP1       | K16733 |
| ENSG00000146729 | -0.153747 | 5.936678 | 0.816689 | 1 GBAS          | -      |
| ENSG00000162231 | 0.154203  | 5.876499 | 0.816715 | 1 NXF1          | K14284 |
| ENSG00000113108 | -0.176286 | 2.988658 | 0.81677  | 1 APBB3         | -      |
| ENSG00000233927 | -0.176286 | 2.988658 | 0.81677  | 1 RPS28         | K02979 |
| ENSG00000070770 | 0.152662  | 6.167731 | 0.816812 | 1 CSNK2A2       | K03097 |
| ENSG00000184068 | 0.177321  | 2.827443 | 0.816819 | 1 RP5-821D11.7  | -      |
| ENSG00000071127 | 0.152519  | 7.236499 | 0.816907 | 1 WDR1          | -      |
| ENSG00000174130 | 0.18704   | 2.447807 | 0.816928 | 1 TLR6          | K10169 |
| ENSG00000118058 | 0.222509  | 1.581542 | 0.816944 | 1 KMT2A         | K09186 |
| ENSG00000236255 | 0.222509  | 1.581542 | 0.816944 | 1 AC009404.2    | -      |
| ENSG00000219529 | 0.19021   | 1.597888 | 0.816944 | 1 AP000580.1    | K02969 |
| ENSG00000198182 | -0.195154 | 2.22831  | 0.816978 | 1 ZNF607        | K09228 |
| ENSG00000213839 | -0.195154 | 2.22831  | 0.816978 | 1 RP11-3J10.4   | -      |
| ENSG00000159674 | 0.174139  | 2.222759 | 0.816978 | 1 SPON2         | -      |
| ENSG00000228797 | 0.205418  | 1.931223 | 0.817004 | 1 FAM207BP      | -      |
| ENSG00000169252 | -0.197627 | 1.96151  | 0.817004 | 1 ADRB2         | K04142 |
| ENSG00000183161 | -0.197627 | 1.96151  | 0.817004 | 1 FANCF         | K10893 |
| ENSG00000160233 | 0.1804    | 1.943844 | 0.817004 | 1 LRRC3         | K17985 |
| ENSG00000186907 | 0.152626  | 6.994339 | 0.817046 | 1 RTN4RL2       | K16661 |
| ENSG00000133961 | 0.155612  | 5.615149 | 0.817158 | 1 NUMB          | K06057 |
| ENSG00000102854 | -0.151613 | 8.253814 | 0.817313 | 1 MSLN          | -      |
| ENSG00000101266 | 0.15279   | 6.648659 | 0.817318 | 1 CSNK2A1       | K03097 |
| ENSG00000240972 | -0.151983 | 7.477147 | 0.817435 | 1 MIF           | K07253 |
| ENSG00000104763 | -0.153547 | 5.883478 | 0.817499 | 1 ASAH1         | K12348 |
| ENSG00000143740 | 0.156007  | 5.518889 | 0.817571 | 1 SNAP47        | K05062 |
| ENSG00000100804 | -0.151765 | 7.554951 | 0.817623 | 1 PSMB5         | K02737 |
| ENSG00000113013 | -0.150797 | 10.17059 | 0.817702 | 1 HSPA9         | K04043 |
| ENSG00000243199 | 0.159428  | 4.457588 | 0.817775 | 1 RP11-408P14.1 | K02934 |
| ENSG00000128228 | 0.153709  | 5.844777 | 0.817807 | 1 SDF2L1        | -      |
| ENSG00000172354 | 0.151462  | 7.537241 | 0.817886 | 1 GNB2          | K04537 |
| ENSG00000140829 | 0.15432   | 5.73782  | 0.81794  | 1 DHX38         | K12815 |
| ENSG00000184661 | -0.154003 | 5.470255 | 0.817972 | 1 CDCA2         | K17590 |
| ENSG00000111639 | -0.151617 | 7.359587 | 0.817984 | 1 MRPL51        | K17432 |
| ENSG00000198783 | -0.157211 | 4.757356 | 0.818037 | 1 ZNF830        | K13104 |



|                 |           |          |          |                |        |
|-----------------|-----------|----------|----------|----------------|--------|
| ENSG00000243927 | -0.154152 | 4.755722 | 0.818037 | 1 MRPS6        | K02990 |
| ENSG00000078369 | 0.151587  | 7.187958 | 0.81806  | 1 GNB1         | K04536 |
| ENSG00000134463 | -0.16498  | 3.394962 | 0.818094 | 1 ECHDC3       | -      |
| ENSG00000145555 | 0.151147  | 7.739092 | 0.818105 | 1 MYO10        | K12559 |
| ENSG00000137656 | -0.163591 | 4.16698  | 0.818151 | 1 BUD13        | K13106 |
| ENSG00000187118 | -0.158976 | 4.164495 | 0.818151 | 1 CMC1         | K18171 |
| ENSG00000083812 | 0.177068  | 3.270812 | 0.818249 | 1 ZNF324       | K09228 |
| ENSG00000131013 | -0.158519 | 4.88447  | 0.818393 | 1 PPIL4        | K12735 |
| ENSG00000100714 | -0.151392 | 7.21664  | 0.818402 | 1 MTHFD1       | K00288 |
| ENSG00000228794 | -0.183307 | 3.150657 | 0.81843  | 1 LINC01128    | -      |
| ENSG00000176209 | 0.169463  | 3.1477   | 0.81843  | 1 SMIM19       | -      |
| ENSG00000241852 | 0.169463  | 3.1477   | 0.81843  | 1 C8orf58      | -      |
| ENSG00000247498 | 0.169463  | 3.1477   | 0.81843  | 1 RP11-392P7.6 | -      |
| ENSG00000130733 | 0.152729  | 5.950039 | 0.818437 | 1 YIPF2        | -      |
| ENSG00000154102 | -0.167468 | 3.954459 | 0.818469 | 1 C16orf74     | -      |
| ENSG00000126524 | -0.15126  | 7.185969 | 0.818593 | 1 SBDS         | K14574 |
| ENSG00000170175 | -0.172956 | 3.01051  | 0.818643 | 1 CHRNB1       | K04812 |
| ENSG00000004779 | -0.15171  | 6.691467 | 0.818733 | 1 NDUFAB1      | K03955 |
| ENSG00000152377 | -0.15176  | 6.645367 | 0.818749 | 1 SPOCK1       | K08136 |
| ENSG00000011638 | -0.163939 | 4.297532 | 0.818756 | 1 TMEM159      | -      |
| ENSG00000143774 | 0.150627  | 7.636075 | 0.818798 | 1 GUK1         | K00942 |
| ENSG00000111596 | -0.15375  | 6.117978 | 0.818848 | 1 CNOT2        | K12605 |
| ENSG00000110931 | -0.152236 | 5.555662 | 0.81885  | 1 CAMKK2       | K07359 |
| ENSG00000170191 | 0.161041  | 4.2333   | 0.81887  | 1 NANP         | K01097 |
| ENSG00000237036 | 0.187981  | 2.845561 | 0.818898 | 1 ZEB1-AS1     | -      |
| ENSG00000234545 | -0.166465 | 3.701685 | 0.818899 | 1 FAM133B      | -      |
| ENSG00000167182 | 0.161893  | 3.69695  | 0.818899 | 1 SP2          | K09192 |
| ENSG00000113328 | -0.150959 | 7.197362 | 0.818936 | 1 CCNG1        | K10145 |
| ENSG00000189057 | 0.155277  | 4.847293 | 0.818987 | 1 FAM111B      | -      |
| ENSG00000077254 | 0.150509  | 7.4163   | 0.819119 | 1 USP33        | K11848 |
| ENSG00000111711 | -0.151023 | 6.960332 | 0.819153 | 1 GOLT1B       | -      |
| ENSG00000129518 | 0.152787  | 5.214158 | 0.819169 | 1 EAPP         | -      |
| ENSG00000049541 | 0.193533  | 2.6705   | 0.819207 | 1 RFC2         | K10755 |
| ENSG00000128713 | -0.187592 | 2.675438 | 0.819207 | 1 HOXD11       | K09296 |
| ENSG00000169629 | 0.178762  | 2.677829 | 0.819207 | 1 RGPD8        | K12172 |
| ENSG00000113615 | 0.151213  | 5.506391 | 0.819285 | 1 SEC24A       | K14007 |
| ENSG00000166454 | -0.152826 | 5.99625  | 0.819336 | 1 ATMIN        | -      |
| ENSG00000170775 | -0.159462 | 4.36073  | 0.819389 | 1 GPR37        | K04243 |
| ENSG00000185838 | 0.15835   | 3.95923  | 0.81944  | 1 GNB1L        | -      |
| ENSG00000140374 | 0.150102  | 7.346554 | 0.819665 | 1 ETFA         | K03522 |
| ENSG00000117054 | 0.149831  | 7.685729 | 0.819706 | 1 ACADM        | K00249 |
| ENSG00000234851 | 0.150138  | 7.252118 | 0.819713 | 1 RP11-3P17.3  | K02893 |
| ENSG00000133884 | 0.151216  | 6.347167 | 0.819771 | 1 DPF2         | K13196 |
| ENSG00000187630 | -0.172001 | 3.286947 | 0.819787 | 1 DHRS4L2      | K11147 |
| ENSG00000152767 | 0.152801  | 5.797427 | 0.819815 | 1 FARP1        | -      |
| ENSG00000128694 | -0.162212 | 4.176694 | 0.819829 | 1 OSGEPL1      | K01409 |
| ENSG00000134419 | 0.149045  | 9.34724  | 0.819913 | 1 RPS15A       | K02957 |
| ENSG00000111412 | 0.159535  | 4.677601 | 0.819946 | 1 C12orf49     | -      |
| ENSG00000137274 | -0.161229 | 4.112252 | 0.820002 | 1 BPHL         | K18399 |
| ENSG00000134287 | -0.149924 | 7.314603 | 0.820036 | 1 ARF3         | K07938 |
| ENSG00000184164 | 0.152266  | 5.588945 | 0.820069 | 1 CRELD2       | K16467 |
| ENSG00000197170 | -0.150346 | 6.871427 | 0.820077 | 1 PSMD12       | K03035 |
| ENSG00000059915 | -0.171317 | 2.255213 | 0.820079 | 1 PSD          | K12494 |
| ENSG00000122705 | -0.149422 | 7.97411  | 0.820081 | 1 CLTA         | K04644 |
| ENSG00000099904 | -0.153729 | 5.159238 | 0.820162 | 1 ZDHHC8       | K18932 |
| ENSG00000168792 | -0.155118 | 4.042083 | 0.820192 | 1 ABHD15       | K13707 |
| ENSG00000112312 | -0.149837 | 7.19677  | 0.820268 | 1 GMNN         | K10749 |
| ENSG00000166888 | -0.15007  | 6.956812 | 0.820287 | 1 STAT6        | K11225 |

|                 |           |           |          |                 |        |
|-----------------|-----------|-----------|----------|-----------------|--------|
| ENSG00000132694 | 0.155387  | 4.244966  | 0.820463 | 1 ARHGEF11      | K12331 |
| ENSG00000115541 | -0.14927  | 7.652939  | 0.820498 | 1 HSPE1         | K04078 |
| ENSG00000117118 | -0.149673 | 7.108381  | 0.820565 | 1 SDHB          | K00235 |
| ENSG00000167522 | 0.149506  | 7.127402  | 0.820592 | 1 ANKRD11       | -      |
| ENSG00000135336 | -0.15267  | 5.465303  | 0.820779 | 1 ORC3          | K02605 |
| ENSG00000132676 | -0.149128 | 7.491357  | 0.820808 | 1 DAP3          | K17408 |
| ENSG00000100227 | 0.14976   | 6.709461  | 0.820815 | 1 POLDIP3       | -      |
| ENSG00000148187 | -0.154912 | 5.32366   | 0.820881 | 1 MRRF          | K02838 |
| ENSG00000144747 | 0.15097   | 5.717109  | 0.820912 | 1 TMF1          | -      |
| ENSG00000100028 | -0.148677 | 8.00105   | 0.820947 | 1 SNRPD3        | K11088 |
| ENSG00000103496 | -0.15223  | 5.293804  | 0.82098  | 1 STX4          | K13502 |
| ENSG00000171574 | -0.161432 | 4.315235  | 0.82104  | 1 ZNF584        | -      |
| ENSG00000114902 | 0.149458  | 6.777445  | 0.821077 | 1 SPCS1         | K12946 |
| ENSG00000135679 | 0.149966  | 6.390703  | 0.821085 | 1 MDM2          | K06643 |
| ENSG00000034510 | -0.147867 | 10.16905  | 0.821184 | 1 TMSB10        | K13785 |
| ENSG00000126878 | -0.155928 | 5.23218   | 0.821192 | 1 AIF1L         | K18617 |
| ENSG00000075785 | 0.148315  | 8.117592  | 0.821231 | 1 RAB7A         | K07897 |
| ENSG00000198721 | -0.148616 | 7.45735   | 0.821447 | 1 ECI2          | K13239 |
| ENSG00000139675 | -0.155177 | 4.59455   | 0.821453 | 1 HNRNPA1L2     | K12741 |
| ENSG00000188002 | 0.155039  | 4.190735  | 0.821475 | 1 RP11-43F13.1  | -      |
| ENSG00000103510 | 0.152567  | 5.024942  | 0.821496 | 1 KAT8          | K11308 |
| ENSG00000155744 | 0.168017  | 3.627555  | 0.821505 | 1 FAM126B       | -      |
| ENSG00000159685 | -0.161094 | 4.379815  | 0.821567 | 1 CHCHD6        | K17564 |
| ENSG00000134575 | -0.15261  | 5.700067  | 0.821568 | 1 ACP2          | K14410 |
| ENSG00000165914 | -0.228829 | 1.649252  | 0.821578 | 1 TTC7B         | -      |
| ENSG00000254285 | -0.228829 | 1.649252  | 0.821578 | 1 KRT8P3        | K07605 |
| ENSG00000228801 | 0.21502   | 1.63924   | 0.821578 | 1 RP11-110G21.1 | -      |
| ENSG00000196576 | 0.147787  | 8.344484  | 0.821744 | 1 PLXNB2        | -      |
| ENSG00000185043 | 0.148441  | 7.197544  | 0.821781 | 1 CIB1          | K17259 |
| ENSG00000129625 | -0.148407 | 7.342962  | 0.821807 | 1 REEP5         | K17279 |
| ENSG00000141933 | 0.161586  | 3.532283  | 0.821874 | 1 TPGS1         | K16581 |
| ENSG00000131165 | 0.149068  | 6.507212  | 0.821947 | 1 CHMP1A        | K12197 |
| ENSG00000089685 | -0.148155 | 7.476181  | 0.821976 | 1 BIRC5         | K08731 |
| ENSG00000162614 | -0.156974 | 4.439584  | 0.822051 | 1 NEXN          | -      |
| ENSG00000125648 | -0.149207 | 6.458183  | 0.822101 | 1 SLC25A23      | K14684 |
| ENSG00000112406 | 0.150463  | 4.789772  | 0.822447 | 1 HECA          | K12581 |
| ENSG00000018280 | -0.68332  | -0.566483 | 0.822492 | 1 SLC11A1       | K12347 |
| ENSG00000100399 | -0.68332  | -0.566483 | 0.822492 | 1 CHADL         | -      |
| ENSG00000117586 | -0.68332  | -0.566483 | 0.822492 | 1 TNFSF4        | K05469 |
| ENSG00000123009 | -0.68332  | -0.566483 | 0.822492 | 1 NME2P1        | K00940 |
| ENSG00000124116 | -0.68332  | -0.566483 | 0.822492 | 1 WFDC3         | K08857 |
| ENSG00000136114 | -0.68332  | -0.566483 | 0.822492 | 1 THSD1         | -      |
| ENSG00000137877 | -0.68332  | -0.566483 | 0.822492 | 1 SPTBN5        | K06115 |
| ENSG00000152705 | -0.68332  | -0.566483 | 0.822492 | 1 CATSPER3      | K16891 |
| ENSG00000166596 | -0.68332  | -0.566483 | 0.822492 | 1 WDR16         | -      |
| ENSG00000171160 | -0.68332  | -0.566483 | 0.822492 | 1 MORN4         | K12581 |
| ENSG00000176076 | -0.68332  | -0.566483 | 0.822492 | 1 KCNE1L        | K04895 |
| ENSG00000185860 | -0.68332  | -0.566483 | 0.822492 | 1 C1orf110      | -      |
| ENSG00000188766 | -0.68332  | -0.566483 | 0.822492 | 1 SPRED3        | K04703 |
| ENSG00000203301 | -0.68332  | -0.566483 | 0.822492 | 1 AL590822.1    | K17985 |
| ENSG00000225205 | -0.68332  | -0.566483 | 0.822492 | 1 AC093818.1    | -      |
| ENSG00000226124 | -0.68332  | -0.566483 | 0.822492 | 1 FTCDNL1       | -      |
| ENSG00000232671 | -0.68332  | -0.566483 | 0.822492 | 1 RP11-126K1.2  | -      |
| ENSG00000233110 | -0.68332  | -0.566483 | 0.822492 | 1 RP11-301L8.2  | -      |
| ENSG00000237015 | -0.68332  | -0.566483 | 0.822492 | 1 CTA-984G1.5   | -      |
| ENSG00000238465 | -0.68332  | -0.566483 | 0.822492 | 1 snoU13        | -      |
| ENSG00000241978 | -0.68332  | -0.566483 | 0.822492 | 1 AKAP2         | K16519 |
| ENSG00000247627 | -0.68332  | -0.566483 | 0.822492 | 1 MTND4P12      | K03881 |

|                 |          |           |          |                   |        |
|-----------------|----------|-----------|----------|-------------------|--------|
| ENSG00000254369 | -0.68332 | -0.566483 | 0.822492 | 1 HOXA-AS3        | -      |
| ENSG00000257681 | -0.68332 | -0.566483 | 0.822492 | 1 RP11-341G23.4   | -      |
| ENSG00000259514 | -0.68332 | -0.566483 | 0.822492 | 1 RP11-685G9.2    | -      |
| ENSG00000259768 | -0.68332 | -0.566483 | 0.822492 | 1 RP5-991G20.1    | -      |
| ENSG00000260018 | -0.68332 | -0.566483 | 0.822492 | 1 RP11-505K9.1    | -      |
| ENSG00000260400 | -0.68332 | -0.566483 | 0.822492 | 1 RP11-119F7.5    | -      |
| ENSG00000263823 | -0.68332 | -0.566483 | 0.822492 | 1 RP11-326K13.4   | -      |
| ENSG00000266708 | -0.68332 | -0.566483 | 0.822492 | 1 RP11-661O13.1   | -      |
| ENSG00000267547 | -0.68332 | -0.566483 | 0.822492 | 1 RP11-686D22.4   | -      |
| ENSG00000269427 | -0.68332 | -0.566483 | 0.822492 | 1 CTC-429P9.1     | -      |
| ENSG00000270091 | -0.68332 | -0.566483 | 0.822492 | 1 RP11-78O7.2     | -      |
| ENSG00000270130 | -0.68332 | -0.566483 | 0.822492 | 1 RP11-214K3.23   | -      |
| ENSG00000081985 | 0.542622 | -0.611472 | 0.822492 | 1 IL12RB2         | K05064 |
| ENSG00000084628 | 0.542622 | -0.611472 | 0.822492 | 1 NKAIN1          | -      |
| ENSG00000133392 | 0.542622 | -0.611472 | 0.822492 | 1 MYH11           | K10352 |
| ENSG00000133943 | 0.542622 | -0.611472 | 0.822492 | 1 C14orf159       | -      |
| ENSG00000142959 | 0.542622 | -0.611472 | 0.822492 | 1 BEST4           | K13881 |
| ENSG00000161381 | 0.542622 | -0.611472 | 0.822492 | 1 PLXDC1          | K09228 |
| ENSG00000173275 | 0.542622 | -0.611472 | 0.822492 | 1 ZNF449          | K09230 |
| ENSG00000178201 | 0.542622 | -0.611472 | 0.822492 | 1 VN1R1           | K04614 |
| ENSG00000185275 | 0.542622 | -0.611472 | 0.822492 | 1 CD24P4          | K06469 |
| ENSG00000215022 | 0.542622 | -0.611472 | 0.822492 | 1 RP1-257A7.4     | -      |
| ENSG00000215210 | 0.542622 | -0.611472 | 0.822492 | 1 RBMXP2          | K12885 |
| ENSG00000234322 | 0.542622 | -0.611472 | 0.822492 | 1 ST13P18         | K09560 |
| ENSG00000234616 | 0.542622 | -0.611472 | 0.822492 | 1 JRK             | -      |
| ENSG00000234814 | 0.542622 | -0.611472 | 0.822492 | 1 SVILP1          | K10369 |
| ENSG00000236233 | 0.542622 | -0.611472 | 0.822492 | 1 RP11-12A20.7    | -      |
| ENSG00000236947 | 0.542622 | -0.611472 | 0.822492 | 1 RP11-98G7.1     | -      |
| ENSG00000237595 | 0.542622 | -0.611472 | 0.822492 | 1 RP11-112L6.3    | -      |
| ENSG00000237923 | 0.542622 | -0.611472 | 0.822492 | 1 XXbac-BPG27H4.8 | -      |
| ENSG00000241549 | 0.542622 | -0.611472 | 0.822492 | 1 GUSBP2          | K01195 |
| ENSG00000243759 | 0.542622 | -0.611472 | 0.822492 | 1 ST13P15         | K09560 |
| ENSG00000245680 | 0.542622 | -0.611472 | 0.822492 | 1 ZNF585B         | K09228 |
| ENSG00000258741 | 0.542622 | -0.611472 | 0.822492 | 1 RP11-386M24.4   | K11251 |
| ENSG00000261604 | 0.542622 | -0.611472 | 0.822492 | 1 CTD-2636A23.2   | -      |
| ENSG00000261614 | 0.542622 | -0.611472 | 0.822492 | 1 YBX3P1          | K06099 |
| ENSG00000262434 | 0.542622 | -0.611472 | 0.822492 | 1 RP11-676J12.8   | -      |
| ENSG00000263069 | 0.542622 | -0.611472 | 0.822492 | 1 CTD-2047H16.4   | -      |
| ENSG00000263847 | 0.542622 | -0.611472 | 0.822492 | 1 RP11-143J12.3   | -      |
| ENSG00000265458 | 0.542622 | -0.611472 | 0.822492 | 1 RP13-20L14.6    | -      |
| ENSG00000266852 | 0.542622 | -0.611472 | 0.822492 | 1 MIR4482-1       | -      |
| ENSG00000272369 | 0.542622 | -0.611472 | 0.822492 | 1 RP11-446N19.1   | -      |
| ENSG00000272659 | 0.542622 | -0.611472 | 0.822492 | 1 AP000295.10     | -      |
| ENSG00000272758 | 0.542622 | -0.611472 | 0.822492 | 1 RP11-299J3.8    | -      |
| ENSG00000112599 | 0.354214 | -0.530294 | 0.822492 | 1 GUCA1B          | K08328 |
| ENSG00000122432 | 0.354214 | -0.530294 | 0.822492 | 1 SPATA1          | -      |
| ENSG00000136352 | 0.354214 | -0.530294 | 0.822492 | 1 NKX2-1          | K09342 |
| ENSG00000147144 | 0.354214 | -0.530294 | 0.822492 | 1 CCDC120         | K15696 |
| ENSG00000152439 | 0.354214 | -0.530294 | 0.822492 | 1 ZNF773          | K09228 |
| ENSG00000163687 | 0.354214 | -0.530294 | 0.822492 | 1 DNASE1L3        | K11995 |
| ENSG00000165828 | 0.354214 | -0.530294 | 0.822492 | 1 PRAP1           | K06115 |
| ENSG00000177374 | 0.354214 | -0.530294 | 0.822492 | 1 HIC1            | -      |
| ENSG00000182902 | 0.354214 | -0.530294 | 0.822492 | 1 SLC25A18        | K15107 |
| ENSG00000186510 | 0.354214 | -0.530294 | 0.822492 | 1 CLCNKA          | K05017 |
| ENSG00000197816 | 0.354214 | -0.530294 | 0.822492 | 1 CCDC180         | -      |
| ENSG00000204219 | 0.354214 | -0.530294 | 0.822492 | 1 TCEA3           | -      |
| ENSG00000205704 | 0.354214 | -0.530294 | 0.822492 | 1 LINC00634       | -      |
| ENSG00000214954 | 0.354214 | -0.530294 | 0.822492 | 1 LRRC69          | -      |

|                 |           |           |          |                  |        |
|-----------------|-----------|-----------|----------|------------------|--------|
| ENSG00000215032 | 0.354214  | -0.530294 | 0.822492 | 1 GNL3LP1        | K10570 |
| ENSG00000227775 | 0.354214  | -0.530294 | 0.822492 | 1 RP1-283E3.4    | K02993 |
| ENSG00000232303 | 0.354214  | -0.530294 | 0.822492 | 1 RP11-205M20.7  | K02311 |
| ENSG00000236700 | 0.354214  | -0.530294 | 0.822492 | 1 LINC01010      | -      |
| ENSG00000236829 | 0.354214  | -0.530294 | 0.822492 | 1 Z97634.3       | K02893 |
| ENSG00000248677 | 0.354214  | -0.530294 | 0.822492 | 1 CTD-2044J15.1  | -      |
| ENSG00000248905 | 0.354214  | -0.530294 | 0.822492 | 1 FMN1           | K10367 |
| ENSG00000255874 | 0.354214  | -0.530294 | 0.822492 | 1 LINC00346      | -      |
| ENSG00000257285 | 0.354214  | -0.530294 | 0.822492 | 1 RP11-298I3.1   | -      |
| ENSG00000259298 | 0.354214  | -0.530294 | 0.822492 | 1 RP11-562A8.4   | -      |
| ENSG00000260103 | 0.354214  | -0.530294 | 0.822492 | 1 RP11-100I7.1   | -      |
| ENSG00000260751 | 0.354214  | -0.530294 | 0.822492 | 1 CTD-2196E14.6  | -      |
| ENSG00000264859 | 0.354214  | -0.530294 | 0.822492 | 1 RP11-75N4.2    | -      |
| ENSG00000265982 | 0.354214  | -0.530294 | 0.822492 | 1 RP11-927P21.4  | -      |
| ENSG00000266053 | 0.354214  | -0.530294 | 0.822492 | 1 RP11-143J12.2  | -      |
| ENSG00000266993 | 0.354214  | -0.530294 | 0.822492 | 1 RP4-657D16.3   | -      |
| ENSG00000268093 | 0.354214  | -0.530294 | 0.822492 | 1 AC022154.7     | -      |
| ENSG00000269275 | 0.354214  | -0.530294 | 0.822492 | 1 CTD-2105E13.15 | -      |
| ENSG00000269549 | 0.354214  | -0.530294 | 0.822492 | 1 AL031663.2     | K17985 |
| ENSG00000272345 | 0.354214  | -0.530294 | 0.822492 | 1 RP1-30M3.5     | -      |
| ENSG00000272696 | 0.354214  | -0.530294 | 0.822492 | 1 RP11-339B21.13 | -      |
| ENSG00000165684 | -0.154049 | 5.211036  | 0.822523 | 1 SNAPC4         | K09453 |
| ENSG00000177051 | 0.153163  | 5.209421  | 0.822523 | 1 FBXO46         | K10320 |
| ENSG00000167702 | 0.149139  | 5.533174  | 0.822567 | 1 KIFC2          | K10406 |
| ENSG00000162191 | 0.147846  | 7.047373  | 0.82265  | 1 UBXN1          | -      |
| ENSG00000144647 | -0.167952 | 3.643263  | 0.822693 | 1 POMGNT2        | K18207 |
| ENSG00000145945 | -0.245376 | 1.229628  | 0.82277  | 1 FAM50B         | K13119 |
| ENSG00000172382 | -0.245376 | 1.229628  | 0.82277  | 1 PRSS27         | K09628 |
| ENSG00000196659 | -0.245376 | 1.229628  | 0.82277  | 1 TTC30B         | K19683 |
| ENSG00000213190 | -0.245376 | 1.229628  | 0.82277  | 1 MLLT11         | -      |
| ENSG00000260793 | -0.245376 | 1.229628  | 0.82277  | 1 RP5-882C2.2    | -      |
| ENSG00000171889 | 0.241274  | 1.19811   | 0.82277  | 1 MIR31HG        | -      |
| ENSG00000106852 | -0.208064 | 1.208343  | 0.82277  | 1 LHX6           | K09375 |
| ENSG00000261351 | -0.208064 | 1.208343  | 0.82277  | 1 CTD-3185P2.1   | -      |
| ENSG00000265688 | -0.208064 | 1.208343  | 0.82277  | 1 MAFG-AS1       | -      |
| ENSG00000167977 | 0.151319  | 5.754985  | 0.822793 | 1 KCTD5          | -      |
| ENSG00000198826 | -0.148223 | 6.730798  | 0.8228   | 1 ARHGAP11A      | -      |
| ENSG00000146858 | -0.179517 | 2.891613  | 0.822917 | 1 ZC3HAV1L       | K10734 |
| ENSG00000107223 | -0.147004 | 8.006012  | 0.822931 | 1 EDF1           | K03627 |
| ENSG00000171467 | -0.152703 | 5.110593  | 0.822978 | 1 ZNF318         | -      |
| ENSG00000122786 | -0.147913 | 6.789423  | 0.823078 | 1 CALD1          | K12327 |
| ENSG00000135404 | 0.146417  | 9.119377  | 0.823094 | 1 CD63           | K06497 |
| ENSG00000125971 | 0.148536  | 6.23627   | 0.823157 | 1 DYNLRB1        | K10419 |
| ENSG00000197077 | 0.149874  | 5.665299  | 0.823224 | 1 KIAA1671       | K11447 |
| ENSG00000198736 | 0.152867  | 4.332533  | 0.823266 | 1 MSRB1          | K07305 |
| ENSG00000004897 | -0.147484 | 6.992711  | 0.823304 | 1 CDC27          | K03350 |
| ENSG00000186185 | -0.149403 | 5.761951  | 0.823344 | 1 KIF18B         | K10401 |
| ENSG00000123091 | 0.147991  | 6.361106  | 0.823477 | 1 RNF11          | K11980 |
| ENSG00000132286 | -0.151175 | 4.802007  | 0.823517 | 1 TIMM10B        | K17779 |
| ENSG00000179958 | -0.149807 | 5.669397  | 0.823517 | 1 DCTPP1         | K16904 |
| ENSG00000131668 | -0.148449 | 6.319103  | 0.823542 | 1 BARX1          | K09361 |
| ENSG00000129636 | -0.150672 | 5.403484  | 0.823544 | 1 ITFG1          | K17257 |
| ENSG00000161970 | 0.14589   | 9.5525    | 0.82362  | 1 RPL26          | K02898 |
| ENSG00000144554 | 0.14823   | 5.569668  | 0.823714 | 1 FANCD2         | K10891 |
| ENSG00000184363 | -0.148477 | 6.15782   | 0.82377  | 1 PKP3           | -      |
| ENSG00000176396 | 0.152572  | 4.842722  | 0.823822 | 1 EID2           | -      |
| ENSG00000009954 | -0.159326 | 3.653622  | 0.823867 | 1 BAZ1B          | K11658 |
| ENSG00000127589 | -0.147412 | 6.644945  | 0.823898 | 1 TUBBP1         | K07375 |

|                 |           |          |          |                 |        |
|-----------------|-----------|----------|----------|-----------------|--------|
| ENSG00000108443 | -0.150973 | 5.673695 | 0.8241   | 1 RPS6KB1       | K04688 |
| ENSG00000006831 | 0.146528  | 7.116677 | 0.824136 | 1 ADIPOR2       | K07297 |
| ENSG00000139651 | 0.14814   | 5.916275 | 0.824136 | 1 ZNF740        | -      |
| ENSG00000197948 | -0.161102 | 3.998933 | 0.824147 | 1 FCHSD1        | -      |
| ENSG00000100575 | -0.150715 | 5.288205 | 0.824165 | 1 TIMM9         | K17777 |
| ENSG00000174718 | -0.150715 | 5.288205 | 0.824165 | 1 KIAA1551      | -      |
| ENSG00000147526 | 0.15386   | 4.144353 | 0.824245 | 1 TACC1         | K14281 |
| ENSG00000138297 | -0.175073 | 3.32688  | 0.82425  | 1 TIMM23        | K17794 |
| ENSG00000248487 | -0.211117 | 2.017431 | 0.824282 | 1 ABHD14A       | K13706 |
| ENSG00000105479 | 0.299634  | 0.559845 | 0.824298 | 1 CCDC114       | -      |
| ENSG00000143429 | 0.299634  | 0.559845 | 0.824298 | 1 AC027612.6    | K14957 |
| ENSG00000175018 | 0.299634  | 0.559845 | 0.824298 | 1 TEX36         | -      |
| ENSG00000196998 | 0.299634  | 0.559845 | 0.824298 | 1 WDR45         | -      |
| ENSG00000263013 | 0.299634  | 0.559845 | 0.824298 | 1 RP11-876N24.5 | -      |
| ENSG00000269089 | 0.299634  | 0.559845 | 0.824298 | 1 AP003733.1    | K06115 |
| ENSG00000118096 | -0.280968 | 0.634607 | 0.824298 | 1 IFT46         | K19682 |
| ENSG00000135100 | -0.280968 | 0.634607 | 0.824298 | 1 HNF1A         | K08036 |
| ENSG00000139899 | -0.280968 | 0.634607 | 0.824298 | 1 CBLN3         | -      |
| ENSG00000244490 | -0.280968 | 0.634607 | 0.824298 | 1 RWDD4P1       | -      |
| ENSG00000112425 | -0.222476 | 0.601334 | 0.824298 | 1 EPM2A         | K14165 |
| ENSG00000136867 | -0.222476 | 0.601334 | 0.824298 | 1 SLC31A2       | K14687 |
| ENSG00000213742 | -0.222476 | 0.601334 | 0.824298 | 1 ZNF337-AS1    | -      |
| ENSG00000227906 | -0.222476 | 0.601334 | 0.824298 | 1 SNAP25-AS1    | -      |
| ENSG00000237289 | -0.222476 | 0.601334 | 0.824298 | 1 CKMT1B        | -      |
| ENSG00000122406 | 0.145151  | 10.5663  | 0.824353 | 1 RPL5          | K02932 |
| ENSG00000115641 | -0.145833 | 7.879035 | 0.824409 | 1 FHL2          | K14380 |
| ENSG00000204070 | 0.150878  | 4.514427 | 0.824447 | 1 SYS1          | K17776 |
| ENSG00000126581 | -0.148518 | 5.496703 | 0.824457 | 1 BECN1         | K08334 |
| ENSG00000089248 | 0.145529  | 8.26695  | 0.824465 | 1 ERP29         | K09586 |
| ENSG00000148110 | 0.146937  | 6.483859 | 0.824511 | 1 HIATL1        | -      |
| ENSG00000171161 | -0.152367 | 4.719574 | 0.824537 | 1 ZNF672        | K09228 |
| ENSG00000126653 | -0.14958  | 5.748155 | 0.824563 | 1 NSRP1         | K13206 |
| ENSG00000066933 | 0.154256  | 4.075747 | 0.824633 | 1 MYO9A         | K10360 |
| ENSG00000070915 | 0.154256  | 4.075747 | 0.824633 | 1 SLC12A3       | K14426 |
| ENSG00000081026 | 0.154256  | 4.075747 | 0.824633 | 1 MAGI3         | K06112 |
| ENSG00000100784 | 0.164107  | 2.519144 | 0.824692 | 1 RPS6KA5       | K04445 |
| ENSG00000168310 | 0.151069  | 4.461631 | 0.824754 | 1 IRF2          | K10153 |
| ENSG00000103351 | -0.152415 | 4.768635 | 0.824827 | 1 CLUAP1        | K19684 |
| ENSG00000116922 | -0.150452 | 4.854457 | 0.824845 | 1 C1orf109      | -      |
| ENSG00000213683 | -0.164772 | 2.908848 | 0.82486  | 1 AC002056.3    | K11092 |
| ENSG00000105287 | 0.148302  | 4.936002 | 0.824861 | 1 PRKD2         | K06070 |
| ENSG00000197771 | -0.145881 | 7.276686 | 0.824873 | 1 MCMBP         | -      |
| ENSG00000159842 | 0.148624  | 5.354852 | 0.824928 | 1 ABR           | K08878 |
| ENSG00000175595 | -0.165662 | 3.448164 | 0.824994 | 1 ERCC4         | K10848 |
| ENSG00000185596 | 0.15816   | 3.659303 | 0.825024 | 1 WASH3P        | K18461 |
| ENSG00000136937 | -0.146454 | 6.617984 | 0.825079 | 1 NCBP1         | K12882 |
| ENSG00000153406 | -0.146411 | 6.561567 | 0.825226 | 1 NMRAL1        | K05610 |
| ENSG00000158104 | -0.146377 | 6.479959 | 0.825412 | 1 HPD           | K00457 |
| ENSG00000070761 | -0.148615 | 5.450345 | 0.825446 | 1 C16orf80      | -      |
| ENSG00000270081 | -0.155591 | 4.224314 | 0.825465 | 1 RP5-935K16.1  | -      |
| ENSG00000072415 | -0.146546 | 6.350598 | 0.825476 | 1 MPP5          | K06091 |
| ENSG00000175063 | -0.145965 | 6.72253  | 0.82549  | 1 UBE2C         | K06688 |
| ENSG00000079332 | 0.144714  | 8.132037 | 0.825503 | 1 SAR1A         | K07953 |
| ENSG00000165169 | 0.146247  | 6.355752 | 0.825552 | 1 DYNLT3        | K10420 |
| ENSG00000137073 | -0.146868 | 5.479125 | 0.825604 | 1 UBAP2         | -      |
| ENSG00000066084 | 0.146129  | 6.173199 | 0.825625 | 1 DIP2B         | -      |
| ENSG00000186076 | 0.166884  | 3.558499 | 0.825625 | 1 RP11-887P2.3  | K01834 |
| ENSG00000071894 | -0.163556 | 3.074158 | 0.825769 | 1 CPSF1         | K14401 |

|                 |           |          |          |                 |        |
|-----------------|-----------|----------|----------|-----------------|--------|
| ENSG00000198742 | -0.149898 | 4.948297 | 0.825816 | 1 SMURF1        | K04678 |
| ENSG00000054611 | 0.147984  | 4.862483 | 0.825856 | 1 TBC1D22A      | -      |
| ENSG00000105612 | -0.145306 | 6.998901 | 0.825881 | 1 DNASE2        | K01158 |
| ENSG00000125868 | 0.144201  | 8.564553 | 0.825913 | 1 DSTN          | K10363 |
| ENSG00000175322 | 0.186573  | 2.286524 | 0.825977 | 1 ZNF519        | K09228 |
| ENSG00000261799 | 0.186573  | 2.286524 | 0.825977 | 1 RP11-283I3.6  | -      |
| ENSG00000159556 | -0.183129 | 2.30092  | 0.825977 | 1 ISL2          | K18492 |
| ENSG00000124549 | 0.167252  | 2.296235 | 0.825977 | 1 BTN2A3P       | K06712 |
| ENSG00000112541 | 0.149655  | 5.062204 | 0.825982 | 1 PDE10A        | K18438 |
| ENSG00000011295 | -0.148634 | 5.665085 | 0.825982 | 1 TTC19         | K18169 |
| ENSG00000118804 | -0.218205 | 1.703729 | 0.825983 | 1 FAM47E-STBD1  | -      |
| ENSG00000228989 | -0.218205 | 1.703729 | 0.825983 | 1 AC133528.2    | -      |
| ENSG00000261706 | -0.218205 | 1.703729 | 0.825983 | 1 AP001505.9    | -      |
| ENSG00000049759 | 0.147972  | 5.363406 | 0.826    | 1 NEDD4L        | K13305 |
| ENSG00000258289 | 0.145159  | 6.01254  | 0.826027 | 1 CHURC1        | K09228 |
| ENSG00000102189 | -0.147404 | 4.988882 | 0.826028 | 1 EEA1          | K12478 |
| ENSG00000011304 | 0.144104  | 8.540239 | 0.826038 | 1 PTBP1         | K13218 |
| ENSG00000154473 | -0.144278 | 8.146745 | 0.826087 | 1 BUB3          | K02180 |
| ENSG00000156787 | -0.148081 | 5.642452 | 0.826144 | 1 TBC1D31       | -      |
| ENSG00000140307 | -0.145275 | 6.828133 | 0.82615  | 1 GTF2A2        | K03123 |
| ENSG00000060339 | -0.144758 | 7.16569  | 0.826329 | 1 CCAR1         | K11978 |
| ENSG00000203791 | -0.150708 | 4.781434 | 0.826432 | 1 METTL10       | -      |
| ENSG00000130958 | -0.155357 | 4.421278 | 0.826452 | 1 SLC35D2       | K15281 |
| ENSG00000267100 | 0.154247  | 3.939394 | 0.826478 | 1 ILF3-AS1      | -      |
| ENSG00000197892 | 0.164221  | 3.206016 | 0.826502 | 1 KIF13B        | K17914 |
| ENSG00000063176 | -0.153602 | 3.21755  | 0.826502 | 1 SPHK2         | K04718 |
| ENSG00000244398 | 0.143706  | 8.555364 | 0.826506 | 1 RP11-466H18.1 | K02929 |
| ENSG00000155561 | -0.144332 | 7.486746 | 0.826507 | 1 NUP205        | K14310 |
| ENSG00000103275 | -0.144181 | 7.588393 | 0.826596 | 1 UBE2I         | K10577 |
| ENSG00000128534 | -0.144591 | 6.314716 | 0.826692 | 1 NAA38         | K12627 |
| ENSG00000038358 | -0.148607 | 5.371022 | 0.826708 | 1 EDC4          | K12616 |
| ENSG00000141424 | -0.144954 | 6.684265 | 0.826749 | 1 SLC39A6       | K14712 |
| ENSG00000169188 | -0.146921 | 5.596091 | 0.826786 | 1 APEX2         | K10772 |
| ENSG00000116138 | -0.162622 | 3.578602 | 0.826841 | 1 DNAJC16       | K09536 |
| ENSG00000135473 | -0.148075 | 4.872515 | 0.826855 | 1 PAN2          | K12571 |
| ENSG00000138119 | 0.143607  | 8.008465 | 0.826889 | 1 MYOF          | K18261 |
| ENSG00000100065 | -0.146434 | 5.857268 | 0.826894 | 1 CARD10        | -      |
| ENSG00000130758 | -0.149284 | 4.995772 | 0.826945 | 1 MAP3K10       | K04418 |
| ENSG00000135842 | 0.146306  | 5.570591 | 0.826969 | 1 FAM129A       | -      |
| ENSG00000113282 | -0.144393 | 6.956836 | 0.827019 | 1 CLINT1        | K12471 |
| ENSG00000066651 | -0.150309 | 5.10932  | 0.827021 | 1 TRMT11        | K15430 |
| ENSG00000188352 | 0.144615  | 5.516972 | 0.827038 | 1 FOCAD         | -      |
| ENSG00000084733 | 0.144087  | 7.035028 | 0.827125 | 1 RAB10         | K07903 |
| ENSG00000157036 | -0.1784   | 2.545889 | 0.827137 | 1 EXOG          | K15050 |
| ENSG00000086598 | -0.143166 | 8.618892 | 0.827177 | 1 TMED2         | K14809 |
| ENSG00000116396 | -0.150537 | 4.487223 | 0.827376 | 1 KCNC4         | -      |
| ENSG00000161013 | -0.1439   | 7.098527 | 0.827427 | 1 MGAT4B        | K00738 |
| ENSG00000130363 | 0.166049  | 3.071566 | 0.827465 | 1 RSPH3         | K17985 |
| ENSG00000198837 | -0.14538  | 5.703442 | 0.827518 | 1 DENND4B       | -      |
| ENSG00000121064 | 0.146334  | 5.493785 | 0.827559 | 1 SCPEP1        | K09646 |
| ENSG00000152464 | -0.148709 | 5.041735 | 0.827561 | 1 RPP38         | K14523 |
| ENSG00000072210 | -0.144526 | 6.478983 | 0.827608 | 1 ALDH3A2       | K00128 |
| ENSG00000175348 | -0.14485  | 5.797062 | 0.827632 | 1 TMEM9B        | -      |
| ENSG00000166025 | 0.145978  | 5.925687 | 0.827659 | 1 AMOTL1        | K06104 |
| ENSG00000075336 | -0.152891 | 4.83617  | 0.82767  | 1 TIMM21        | K17796 |
| ENSG00000110717 | -0.144199 | 6.656298 | 0.82769  | 1 NDUFS8        | K03941 |
| ENSG00000179348 | 0.143843  | 6.755251 | 0.827766 | 1 GATA2         | K17894 |
| ENSG00000102024 | -0.153064 | 4.242932 | 0.827774 | 1 PLS3          | K17336 |

|                 |           |          |          |   |               |        |
|-----------------|-----------|----------|----------|---|---------------|--------|
| ENSG00000145495 | 0.142591  | 8.488139 | 0.82786  | 1 | 6-Mar         | K10661 |
| ENSG00000226742 | -0.145522 | 5.606924 | 0.827985 | 1 | HSBP1L1       | -      |
| ENSG00000203965 | -0.153097 | 4.31076  | 0.828025 | 1 | EFCAB7        | -      |
| ENSG00000100429 | 0.15779   | 3.577145 | 0.82804  | 1 | HDAC10        | K18671 |
| ENSG00000174579 | 0.143549  | 6.141218 | 0.828042 | 1 | MSL2          | K13164 |
| ENSG00000116675 | -0.144687 | 5.190766 | 0.828129 | 1 | DNAJC6        | K09526 |
| ENSG00000145494 | -0.142694 | 7.88611  | 0.828136 | 1 | NDUFS6        | K03939 |
| ENSG00000185085 | 0.146159  | 4.964399 | 0.828158 | 1 | INTS5         | K13142 |
| ENSG00000143799 | -0.142192 | 9.059068 | 0.828178 | 1 | PARP1         | K10798 |
| ENSG00000120314 | 0.147393  | 5.580714 | 0.828188 | 1 | WDR55         | -      |
| ENSG00000134291 | 0.142439  | 8.070829 | 0.828243 | 1 | TMEM106C      | -      |
| ENSG00000145780 | 0.147115  | 5.257258 | 0.828373 | 1 | FEM1C         | -      |
| ENSG00000104067 | -0.144302 | 6.071835 | 0.828406 | 1 | TJP1          | K05701 |
| ENSG00000198876 | 0.144492  | 6.162207 | 0.828513 | 1 | DCAF12        | K11803 |
| ENSG00000148985 | -0.146573 | 5.418932 | 0.828555 | 1 | PGAP2         | -      |
| ENSG00000133488 | 0.168279  | 2.923291 | 0.828623 | 1 | SEC14L4       | K17981 |
| ENSG00000115657 | 0.156019  | 2.929384 | 0.828623 | 1 | ABCB6         | K05661 |
| ENSG00000090863 | 0.14293   | 6.896023 | 0.828666 | 1 | GLG1          | K06816 |
| ENSG00000182446 | 0.142443  | 7.392166 | 0.828718 | 1 | NPLOC4        | K14015 |
| ENSG00000099326 | 0.147237  | 4.703153 | 0.82875  | 1 | MZF1          | K09221 |
| ENSG00000131797 | 0.182882  | 2.322151 | 0.828783 | 1 | CLUHP3        | K03255 |
| ENSG00000151572 | -0.177569 | 2.335909 | 0.828783 | 1 | ANO4          | K19499 |
| ENSG00000145194 | -0.145699 | 5.36039  | 0.829049 | 1 | ECE2          | K01415 |
| ENSG00000158773 | -0.145699 | 5.36039  | 0.829049 | 1 | USF1          | K09106 |
| ENSG00000103035 | -0.142344 | 7.160503 | 0.829203 | 1 | PSMD7         | K03038 |
| ENSG00000230291 | 0.156576  | 3.591794 | 0.829222 | 1 | RP11-244J10.1 | K02898 |
| ENSG00000233461 | 0.156576  | 3.591794 | 0.829222 | 1 | RP11-295G20.2 | -      |
| ENSG00000167674 | 0.14258   | 6.783805 | 0.829227 | 1 | HDGFRP2       | -      |
| ENSG00000139505 | 0.148823  | 4.890861 | 0.829304 | 1 | MTMR6         | K18083 |
| ENSG00000038210 | -0.147169 | 4.758934 | 0.829433 | 1 | PI4K2B        | -      |
| ENSG00000078304 | 0.14264   | 6.581015 | 0.829449 | 1 | PPP2R5C       | K11584 |
| ENSG00000105723 | 0.144544  | 6.002306 | 0.829485 | 1 | GSK3A         | K08822 |
| ENSG00000168993 | -0.159626 | 2.567642 | 0.829515 | 1 | CPLX1         | K15294 |
| ENSG00000184990 | 0.142184  | 6.322128 | 0.829543 | 1 | SIVA1         | -      |
| ENSG00000107175 | -0.146113 | 5.671121 | 0.829597 | 1 | CREB3         | K09048 |
| ENSG00000114857 | -0.14449  | 5.670261 | 0.829597 | 1 | NKTR          | K12740 |
| ENSG00000146242 | -0.142458 | 6.743555 | 0.829619 | 1 | TPBG          | -      |
| ENSG00000074800 | 0.140588  | 11.44076 | 0.829726 | 1 | ENO1          | K01689 |
| ENSG00000151247 | -0.143689 | 5.621242 | 0.829753 | 1 | EIF4E         | K03259 |
| ENSG00000185818 | 0.146088  | 5.270962 | 0.829869 | 1 | NAT8L         | K18309 |
| ENSG00000092098 | 0.152802  | 3.884022 | 0.829976 | 1 | RNF31         | K11974 |
| ENSG00000140853 | 0.144913  | 4.981172 | 0.829987 | 1 | NLRC5         | -      |
| ENSG00000173473 | 0.141953  | 6.770197 | 0.829991 | 1 | SMARCC1       | K11649 |
| ENSG00000119402 | -0.142665 | 6.294763 | 0.830007 | 1 | FBXW2         | K10261 |
| ENSG00000155760 | -0.158826 | 2.774106 | 0.830044 | 1 | FZD7          | K02432 |
| ENSG00000227063 | 0.141125  | 7.693973 | 0.830046 | 1 | RPL41P1       | K02928 |
| ENSG00000162144 | 0.143815  | 5.74601  | 0.830052 | 1 | CYB561A3      | K16295 |
| ENSG00000106628 | -0.141137 | 7.765821 | 0.830075 | 1 | POLD2         | K02328 |
| ENSG00000116251 | 0.140606  | 8.670649 | 0.830153 | 1 | RPL22         | K02891 |
| ENSG00000103415 | -0.142065 | 5.818969 | 0.830209 | 1 | HMOX2         | K00510 |
| ENSG00000062716 | 0.140813  | 7.960276 | 0.830243 | 1 | VMP1          | -      |
| ENSG00000103264 | 0.1453    | 4.898249 | 0.830264 | 1 | FBXO31        | K10308 |
| ENSG00000214063 | -0.142422 | 6.357575 | 0.830334 | 1 | TSPAN4        | K17294 |
| ENSG00000198728 | 0.146626  | 5.489885 | 0.830353 | 1 | LDB1          | K15617 |
| ENSG00000184271 | -0.151683 | 3.603891 | 0.830389 | 1 | POU6F1        | K09368 |
| ENSG00000138668 | -0.140555 | 8.293389 | 0.830437 | 1 | HNRNPD        | K13044 |
| ENSG00000134049 | 0.14195   | 6.471038 | 0.830446 | 1 | IER3IP1       | -      |
| ENSG00000060069 | 0.146101  | 5.208244 | 0.830474 | 1 | CTDP1         | K15732 |

|                 |           |          |          |               |        |
|-----------------|-----------|----------|----------|---------------|--------|
| ENSG00000126461 | -0.14205  | 6.498512 | 0.830509 | 1 SCAF1       | -      |
| ENSG00000244687 | 0.154775  | 3.700432 | 0.830594 | 1 UBE2V1      | K10704 |
| ENSG00000156858 | -0.153687 | 4.203037 | 0.830635 | 1 PRR14       | -      |
| ENSG00000072062 | 0.145286  | 4.85796  | 0.83066  | 1 PRKACA      | K04345 |
| ENSG00000198786 | 0.139806  | 11.15989 | 0.830675 | 1 MT-ND5      | K03883 |
| ENSG00000076604 | -0.140855 | 7.418721 | 0.830705 | 1 TRAF4       | K09848 |
| ENSG00000056736 | -0.15774  | 3.11509  | 0.830759 | 1 IL17RB      | K05165 |
| ENSG00000025434 | 0.144504  | 4.98672  | 0.830887 | 1 NR1H3       | K08536 |
| ENSG00000142546 | -0.141568 | 6.562975 | 0.830968 | 1 NOSIP       | K13125 |
| ENSG00000143889 | -0.141764 | 5.996271 | 0.83101  | 1 HNRNPLL     | K13159 |
| ENSG00000106330 | 0.151184  | 3.248448 | 0.831012 | 1 MOSPD3      | -      |
| ENSG00000119471 | -0.141276 | 6.746419 | 0.831018 | 1 HSDL2       | -      |
| ENSG00000117758 | -0.146899 | 3.979457 | 0.831068 | 1 STX12       | K13813 |
| ENSG00000167566 | -0.145723 | 5.144431 | 0.831136 | 1 NCKAP5L     | K17985 |
| ENSG00000137221 | 0.143529  | 5.143922 | 0.831136 | 1 TJAP1       | K06105 |
| ENSG00000124788 | 0.146867  | 4.51637  | 0.831166 | 1 ATXN1       | -      |
| ENSG00000168887 | 0.145747  | 5.180681 | 0.83119  | 1 C2orf68     | K17985 |
| ENSG00000172663 | -0.152259 | 4.063185 | 0.831191 | 1 TMEM134     | -      |
| ENSG00000181218 | -0.149053 | 3.386307 | 0.831219 | 1 HIST3H2A    | K11251 |
| ENSG00000154920 | -0.14413  | 5.250702 | 0.831292 | 1 EME1        | K10882 |
| ENSG00000118680 | 0.139548  | 8.992823 | 0.83131  | 1 MYL12B      | K12757 |
| ENSG00000104980 | -0.140686 | 6.058753 | 0.831318 | 1 TIMM44      | K17804 |
| ENSG00000113649 | -0.140507 | 7.218457 | 0.831323 | 1 TCERG1      | K12824 |
| ENSG00000057294 | -0.146687 | 4.994391 | 0.831334 | 1 PKP2        | K12642 |
| ENSG00000174684 | -0.146687 | 4.994391 | 0.831334 | 1 B3GNT1      | K00741 |
| ENSG00000006453 | -0.14155  | 6.372995 | 0.831339 | 1 BAIAP2L1    | K01557 |
| ENSG00000179532 | 0.141868  | 5.554806 | 0.831379 | 1 DNHD1       | -      |
| ENSG00000114859 | -0.149438 | 3.506918 | 0.831393 | 1 CLCN2       | K05011 |
| ENSG00000273290 | -0.149764 | 3.618213 | 0.83154  | 1 CTC-297N7.8 | -      |
| ENSG00000129810 | -0.144362 | 4.343449 | 0.831574 | 1 SGOL1       | K11580 |
| ENSG00000013375 | 0.140974  | 6.442558 | 0.831653 | 1 PGM3        | K01836 |
| ENSG00000196453 | 0.153689  | 3.713885 | 0.831666 | 1 ZNF777      | K09228 |
| ENSG00000180992 | -0.141375 | 6.174923 | 0.831863 | 1 MRPL14      | K02874 |
| ENSG00000185475 | 0.145688  | 3.898891 | 0.831872 | 1 TMEM179B    | K03131 |
| ENSG00000004866 | 0.145745  | 5.113818 | 0.831899 | 1 ST7         | -      |
| ENSG00000141577 | -0.141818 | 5.115638 | 0.831899 | 1 AZI1        | K16540 |
| ENSG00000152558 | -0.139197 | 8.216211 | 0.832096 | 1 TMEM123     | -      |
| ENSG00000196411 | -0.140152 | 6.886734 | 0.832152 | 1 EPHB4       | K05113 |
| ENSG00000168591 | 0.146581  | 4.958764 | 0.832188 | 1 TMUB2       | -      |
| ENSG00000162636 | 0.141591  | 5.966255 | 0.832312 | 1 FAM102B     | K11339 |
| ENSG00000110880 | 0.139275  | 7.601861 | 0.832316 | 1 CORO1C      | K13886 |
| ENSG00000076984 | -0.143057 | 5.695008 | 0.832373 | 1 MAP2K7      | K04431 |
| ENSG00000130706 | 0.139769  | 6.898955 | 0.832419 | 1 ADRM1       | -      |
| ENSG00000196455 | -0.141193 | 5.83825  | 0.832463 | 1 PIK3R4      | K08333 |
| ENSG00000122566 | -0.138345 | 10.35055 | 0.832503 | 1 HNRNPA2B1   | K13158 |
| ENSG00000182247 | 0.147632  | 4.785016 | 0.832549 | 1 UBE2E2      | K06689 |
| ENSG00000158545 | 0.139744  | 6.069182 | 0.832591 | 1 ZC3H18      | K13092 |
| ENSG00000128692 | -0.145022 | 4.963815 | 0.83264  | 1 EIF2S2P4    | K03238 |
| ENSG00000091009 | -0.142646 | 5.298257 | 0.832784 | 1 RBM27       | K13193 |
| ENSG00000099817 | 0.139009  | 7.403858 | 0.832795 | 1 POLR2E      | K03013 |
| ENSG00000144136 | -0.139026 | 7.505706 | 0.832801 | 1 SLC20A1     | K14640 |
| ENSG00000171953 | 0.150938  | 3.907626 | 0.832804 | 1 ATPAF2      | K07556 |
| ENSG00000117425 | -0.33718  | 0.667029 | 0.832809 | 1 PTCH2       | K11101 |
| ENSG00000138380 | -0.33718  | 0.667029 | 0.832809 | 1 CARF        | -      |
| ENSG00000146021 | -0.33718  | 0.667029 | 0.832809 | 1 KLHL3       | K10443 |
| ENSG00000166823 | -0.33718  | 0.667029 | 0.832809 | 1 MESP1       | K09076 |
| ENSG00000180673 | -0.33718  | 0.667029 | 0.832809 | 1 EXOC5P1     | -      |
| ENSG00000205918 | -0.33718  | 0.667029 | 0.832809 | 1 PDPK2       | K06276 |



|                 |           |          |          |                  |              |
|-----------------|-----------|----------|----------|------------------|--------------|
| ENSG00000227258 | -0.33718  | 0.667029 | 0.832809 | 1 SMIM2-AS1      | -            |
| ENSG00000260456 | -0.33718  | 0.667029 | 0.832809 | 1 C16orf95       | -            |
| ENSG00000271980 | -0.33718  | 0.667029 | 0.832809 | 1 CTD-2256P15.4  | -            |
| ENSG00000099219 | 0.139247  | 7.084348 | 0.832824 | 1 ERMP1          | K04590       |
| ENSG00000076067 | -0.155907 | 3.996133 | 0.832837 | 1 RBMS2          | -            |
| ENSG00000131943 | -0.155907 | 3.996133 | 0.832837 | 1 C19orf12       | -            |
| ENSG00000172992 | -0.151012 | 4.149681 | 0.832891 | 1 DCAKD          | -            |
| ENSG00000227232 | -0.151012 | 4.149681 | 0.832891 | 1 WASH7P         | K18461       |
| ENSG00000125354 | -0.141559 | 5.623912 | 0.832895 | 1                | 6-Sep K16939 |
| ENSG00000108468 | -0.139527 | 6.873715 | 0.832913 | 1 CBX1           | K11585       |
| ENSG00000165943 | 0.147816  | 4.221702 | 0.832914 | 1 MOAP1          | K12581       |
| ENSG00000170382 | 0.147816  | 4.221702 | 0.832914 | 1 LRRN2          | -            |
| ENSG00000178149 | 0.150629  | 4.415084 | 0.83297  | 1 DALRD3         | -            |
| ENSG00000185361 | -0.14451  | 4.533344 | 0.833    | 1 TNFAIP8L1      | K17985       |
| ENSG00000160606 | -0.145495 | 4.694371 | 0.833037 | 1 TLCDC1         | -            |
| ENSG00000137831 | -0.140968 | 6.272263 | 0.833053 | 1 UACA           | -            |
| ENSG00000148308 | 0.139539  | 6.491171 | 0.833275 | 1 GTF3C5         | K15202       |
| ENSG00000105229 | 0.144326  | 5.199914 | 0.833509 | 1 PIAS4          | K16065       |
| ENSG00000187531 | 0.141841  | 5.201111 | 0.833509 | 1 SIRT7          | K11417       |
| ENSG00000139835 | 0.140551  | 4.794563 | 0.833562 | 1 GRTP1          | -            |
| ENSG00000166333 | -0.141431 | 4.699422 | 0.833577 | 1 ILK            | K06272       |
| ENSG00000181029 | -0.145045 | 4.157016 | 0.833675 | 1 TRAPPC5        | K10840       |
| ENSG00000034063 | -0.139072 | 6.690241 | 0.833724 | 1 UHRF1          | -            |
| ENSG00000169499 | -0.139522 | 5.682264 | 0.833734 | 1 PLEKHA2        | K17985       |
| ENSG00000116990 | 0.144759  | 3.829615 | 0.833747 | 1 MYCL           | K09110       |
| ENSG00000179294 | -0.139791 | 6.244788 | 0.833791 | 1 C17orf96       | -            |
| ENSG00000100802 | 0.160529  | 3.631215 | 0.833795 | 1 C14orf93       | -            |
| ENSG00000188997 | -0.162604 | 3.411495 | 0.833855 | 1 KCTD21         | -            |
| ENSG00000243667 | -0.162604 | 3.411495 | 0.833855 | 1 WDR92          | K17985       |
| ENSG00000144029 | -0.138497 | 7.090212 | 0.833861 | 1 MRPS5          | K02988       |
| ENSG00000149600 | -0.143124 | 5.240303 | 0.833876 | 1 COMMD7         | -            |
| ENSG00000118200 | -0.142354 | 5.829027 | 0.833943 | 1 CAMSAP2        | K17493       |
| ENSG00000179562 | -0.14415  | 5.056287 | 0.833948 | 1 GCC1           | -            |
| ENSG00000213904 | -0.264818 | 1.321827 | 0.833964 | 1 LIPE-AS1       | -            |
| ENSG00000270362 | -0.264818 | 1.321827 | 0.833964 | 1 HMGN3-AS1      | -            |
| ENSG00000270055 | -0.230193 | 1.301974 | 0.833964 | 1 CTD-3092A11.2  | -            |
| ENSG00000272593 | 0.190044  | 1.293491 | 0.833964 | 1 RP11-339B21.11 | -            |
| ENSG00000159433 | 0.15233   | 2.974814 | 0.833976 | 1 STARD9         | K16491       |
| ENSG00000100811 | 0.137926  | 7.485216 | 0.834015 | 1 YY1            | K09201       |
| ENSG00000113811 | -0.145756 | 4.890351 | 0.834021 | 1 SELK           | K09228       |
| ENSG00000259032 | 0.166383  | 2.809102 | 0.834026 | 1 ENSAP2         | -            |
| ENSG00000147912 | -0.183207 | 2.612126 | 0.83408  | 1 FBXO10         | K10296       |
| ENSG00000204745 | -0.183207 | 2.612126 | 0.83408  | 1 AC083899.3     | K03348       |
| ENSG00000267796 | 0.171846  | 2.600651 | 0.83408  | 1 LIN37          | -            |
| ENSG00000078618 | 0.137675  | 7.761239 | 0.834107 | 1 NRD1           | K01411       |
| ENSG00000100031 | 0.140816  | 5.40336  | 0.834149 | 1 GGT1           | K18592       |
| ENSG00000184983 | 0.201738  | 1.748114 | 0.834171 | 1 NDUFA6         | K03950       |
| ENSG00000091157 | -0.196271 | 2.101084 | 0.834179 | 1 WDR7           | -            |
| ENSG00000147955 | 0.137588  | 7.756579 | 0.834214 | 1 SIGMAR1        | -            |
| ENSG00000143153 | -0.137377 | 8.169948 | 0.834292 | 1 ATP1B1         | K01540       |
| ENSG00000167962 | 0.13786   | 7.194502 | 0.834359 | 1 ZNF598         | -            |
| ENSG00000196419 | -0.136894 | 9.546268 | 0.834369 | 1 XRCC6          | K10884       |
| ENSG00000078403 | -0.142961 | 5.554733 | 0.834369 | 1 MLLT10         | K06630       |
| ENSG00000141971 | -0.142747 | 5.526485 | 0.83439  | 1 MVB12A         | K12186       |
| ENSG00000091164 | -0.13843  | 5.810409 | 0.834453 | 1 TXNL1          | -            |
| ENSG00000058453 | -0.143245 | 4.091655 | 0.834507 | 1 CROCC          | K16469       |
| ENSG00000240344 | 0.143011  | 4.847336 | 0.834526 | 1 PPIL3          | K12734       |
| ENSG00000119685 | 0.148961  | 4.00651  | 0.834569 | 1 TTLL5          | K16602       |

|                 |           |          |          |                |        |
|-----------------|-----------|----------|----------|----------------|--------|
| ENSG00000150977 | -0.147803 | 4.015148 | 0.834569 | 1 RILPL2       | -      |
| ENSG00000173852 | 0.140387  | 5.922787 | 0.8346   | 1 DPY19L1      | -      |
| ENSG00000105321 | 0.143724  | 4.704853 | 0.834647 | 1 CCDC9        | -      |
| ENSG00000244716 | 0.137047  | 7.994386 | 0.834709 | 1 RP11-20O24.4 | K02880 |
| ENSG00000213866 | -0.147035 | 3.842547 | 0.834716 | 1 YBX1P10      | K09276 |
| ENSG00000067606 | 0.144696  | 3.743794 | 0.834802 | 1 PRKCZ        | K18952 |
| ENSG00000184349 | 0.144696  | 3.743794 | 0.834802 | 1 EFNA5        | K05462 |
| ENSG00000174227 | -0.145822 | 4.493045 | 0.834852 | 1 PIGG         | K05310 |
| ENSG00000093167 | 0.140313  | 5.903122 | 0.834853 | 1 LRRFIP2      | -      |
| ENSG00000009335 | 0.137795  | 6.79529  | 0.8349   | 1 UBE3C        | K10589 |
| ENSG00000065548 | -0.137813 | 6.899649 | 0.834916 | 1 ZC3H15       | -      |
| ENSG00000125484 | -0.139387 | 6.219721 | 0.834934 | 1 GTF3C4       | K11310 |
| ENSG00000206195 | -0.152613 | 3.541268 | 0.835013 | 1 AP000525.9   | -      |
| ENSG00000165209 | -0.137509 | 5.928094 | 0.835059 | 1 STRBP        | K13200 |
| ENSG00000142544 | -0.152513 | 3.423622 | 0.835143 | 1 CTU1         | K14168 |
| ENSG00000255150 | 0.146881  | 3.418171 | 0.835143 | 1 EID3         | -      |
| ENSG00000015475 | -0.142911 | 4.714532 | 0.835177 | 1 BID          | K04726 |
| ENSG00000132561 | 0.13937   | 5.616035 | 0.835187 | 1 MATN2        | -      |
| ENSG00000133983 | -0.145284 | 5.068096 | 0.835199 | 1 COX16        | K18182 |
| ENSG00000173083 | -0.142517 | 4.663558 | 0.835241 | 1 HPSE         | K07964 |
| ENSG00000128283 | 0.136999  | 7.324483 | 0.835259 | 1 CDC42EP1     | -      |
| ENSG00000109805 | -0.137438 | 6.86623  | 0.835407 | 1 NCAPG        | K06678 |
| ENSG00000137504 | -0.136847 | 7.45116  | 0.835446 | 1 CREBZF       | -      |
| ENSG00000141664 | -0.14482  | 4.500804 | 0.835465 | 1 ZCCHC2       | -      |
| ENSG00000196363 | -0.138032 | 6.375647 | 0.835509 | 1 WDR5         | K14963 |
| ENSG00000061273 | -0.137516 | 6.723391 | 0.835523 | 1 HDAC7        | K11408 |
| ENSG00000005073 | -0.152072 | 2.999068 | 0.835687 | 1 HOXA11       | K09296 |
| ENSG00000011009 | -0.140839 | 5.725978 | 0.83585  | 1 LYPLA2       | K06130 |
| ENSG00000184731 | -0.163706 | 2.830827 | 0.835948 | 1 FAM110C      | K13194 |
| ENSG00000115159 | -0.13936  | 5.777227 | 0.83602  | 1 GPD2         | K00111 |
| ENSG00000140992 | 0.14399   | 4.502903 | 0.836073 | 1 PDPK1        | K06276 |
| ENSG00000243646 | 0.140962  | 5.035712 | 0.836096 | 1 IL10RB       | K05135 |
| ENSG00000065135 | -0.135968 | 7.931554 | 0.836116 | 1 GNAI3        | K04630 |
| ENSG00000063245 | -0.136489 | 7.137679 | 0.836195 | 1 EPN1         | K12471 |
| ENSG00000171148 | -0.137329 | 6.042893 | 0.836211 | 1 TADA3        | K11315 |
| ENSG00000115107 | 0.139176  | 5.512172 | 0.836245 | 1 STEAP3       | K10142 |
| ENSG00000132846 | -0.151495 | 4.028679 | 0.836267 | 1 ZBED3        | -      |
| ENSG00000101751 | 0.169174  | 2.629362 | 0.836273 | 1 POLI         | K03510 |
| ENSG00000224930 | -0.144902 | 4.672191 | 0.836327 | 1 LINC00162    | -      |
| ENSG00000082213 | -0.137294 | 6.373008 | 0.836391 | 1 C5orf22      | -      |
| ENSG00000122042 | -0.138885 | 5.572342 | 0.836426 | 1 UBL3         | -      |
| ENSG00000008869 | 0.148253  | 3.942321 | 0.836433 | 1 HEATR5B      | -      |
| ENSG00000070501 | -0.144571 | 4.619671 | 0.836436 | 1 POLB         | K02330 |
| ENSG00000113068 | -0.137251 | 6.198399 | 0.836495 | 1 PFDN1        | K09548 |
| ENSG00000228589 | -0.139546 | 5.193156 | 0.836581 | 1 SPCS2P4      | K12947 |
| ENSG00000133265 | -0.137322 | 5.629237 | 0.836593 | 1 HSPBP1       | K09562 |
| ENSG00000226562 | 0.176028  | 2.39086  | 0.836688 | 1 CYP4F26P     | -      |
| ENSG00000106617 | -0.167247 | 2.403458 | 0.836688 | 1 PRKAG2       | K07200 |
| ENSG00000173480 | 0.158143  | 2.399853 | 0.836688 | 1 ZNF417       | K09228 |
| ENSG00000185627 | -0.136514 | 6.676176 | 0.836787 | 1 PSMD13       | K03039 |
| ENSG00000180233 | 0.143922  | 4.449678 | 0.836813 | 1 ZNRF2        | K10694 |
| ENSG00000100625 | -0.140778 | 4.67732  | 0.836865 | 1 SIX4         | K15615 |
| ENSG00000137288 | -0.137104 | 5.232156 | 0.83687  | 1 UQCC2        | K17682 |
| ENSG00000100906 | -0.136747 | 6.182799 | 0.836914 | 1 NFKBIA       | K04734 |
| ENSG00000111276 | 0.136578  | 6.386997 | 0.83697  | 1 CDKN1B       | K06624 |
| ENSG00000114554 | -0.137246 | 5.988017 | 0.836988 | 1 PLXNA1       | K06820 |
| ENSG00000101911 | -0.136671 | 6.403876 | 0.837071 | 1 PRPS2        | K00948 |
| ENSG00000189423 | -0.17017  | 2.130374 | 0.837235 | 1 USP32P3      | K11837 |

|                 |           |          |          |                |        |
|-----------------|-----------|----------|----------|----------------|--------|
| ENSG00000110723 | 0.164008  | 2.116078 | 0.837235 | 1 EXPH5        | -      |
| ENSG00000131470 | 0.139695  | 5.197531 | 0.83733  | 1 PSMC3IP      | K06695 |
| ENSG00000137802 | 0.140673  | 4.188459 | 0.837485 | 1 MAPKBP1      | -      |
| ENSG00000181045 | 0.140673  | 4.188459 | 0.837485 | 1 SLC26A11     | K14708 |
| ENSG00000155189 | -0.139089 | 5.272405 | 0.8375   | 1 AGPAT5       | K19007 |
| ENSG00000211456 | -0.139089 | 5.272405 | 0.8375   | 1 SACM1L       | -      |
| ENSG00000007392 | -0.137785 | 5.789959 | 0.837522 | 1 LUC7L        | -      |
| ENSG00000141027 | -0.13611  | 6.491242 | 0.837578 | 1 NCOR1        | K04650 |
| ENSG00000127445 | 0.13558   | 5.971848 | 0.837698 | 1 PIN1         | K09578 |
| ENSG00000136897 | -0.136482 | 6.016733 | 0.837789 | 1 MRPL50       | K17431 |
| ENSG00000214975 | 0.15113   | 2.840478 | 0.837826 | 1 PPIAP29      | K03767 |
| ENSG00000116863 | 0.136227  | 5.498647 | 0.837831 | 1 ADPRHL2      | K11687 |
| ENSG00000110066 | 0.138878  | 4.520248 | 0.837872 | 1 SUV420H1     | K11429 |
| ENSG00000148730 | 0.136428  | 6.154199 | 0.837972 | 1 EIF4EBP2     | K18644 |
| ENSG00000171790 | -0.199305 | 1.806924 | 0.837983 | 1 SLFNL1       | -      |
| ENSG00000006530 | 0.195822  | 1.799603 | 0.837983 | 1 AGK          | K09881 |
| ENSG00000177542 | -0.137796 | 5.865573 | 0.838035 | 1 SLC25A22     | K15107 |
| ENSG00000170037 | -0.139551 | 5.092697 | 0.838046 | 1 CNTROB       | K16468 |
| ENSG00000089157 | 0.133604  | 11.28863 | 0.838072 | 1 RPLP0        | K02941 |
| ENSG00000107581 | 0.133823  | 8.770056 | 0.83821  | 1 EIF3A        | K03254 |
| ENSG00000197323 | 0.134948  | 6.837332 | 0.838233 | 1 TRIM33       | K08883 |
| ENSG00000171302 | 0.13539   | 6.373295 | 0.838408 | 1 CANT1        | K12304 |
| ENSG00000154582 | -0.134845 | 6.905888 | 0.83844  | 1 TCEB1        | K03872 |
| ENSG00000090661 | -0.158886 | 3.179452 | 0.838473 | 1 CERS4        | K04710 |
| ENSG00000005059 | 0.157338  | 3.172505 | 0.838473 | 1 CCDC109B     | -      |
| ENSG00000106701 | -0.148626 | 3.57102  | 0.838483 | 1 FSD1L        | -      |
| ENSG00000137103 | -0.148626 | 3.57102  | 0.838483 | 1 TMEM8B       | -      |
| ENSG00000168894 | 0.138492  | 5.798198 | 0.838509 | 1 RNF181       | -      |
| ENSG00000123374 | -0.134288 | 7.430488 | 0.838515 | 1 CDK2         | K02206 |
| ENSG00000131941 | 0.136338  | 5.280036 | 0.838557 | 1 RHPN2        | -      |
| ENSG00000101596 | -0.134798 | 6.785904 | 0.838663 | 1 SMCHD1       | -      |
| ENSG00000139546 | -0.13742  | 5.507342 | 0.838734 | 1 TARBP2       | K18420 |
| ENSG00000104886 | -0.137059 | 5.871575 | 0.838736 | 1 PLEKHJ1      | -      |
| ENSG00000082068 | -0.135191 | 6.407499 | 0.838824 | 1 WDR70        | -      |
| ENSG00000122696 | 0.1529    | 3.446507 | 0.83889  | 1 SLC25A51     | K17675 |
| ENSG00000176463 | -0.138912 | 4.205285 | 0.838962 | 1 SLCO3A1      | K14353 |
| ENSG00000138107 | 0.134122  | 7.043659 | 0.838971 | 1 ACTR1A       | K16575 |
| ENSG00000142327 | 0.135845  | 5.352714 | 0.838994 | 1 RNPEPL1      | K09605 |
| ENSG00000166233 | 0.134608  | 6.563463 | 0.839023 | 1 ARIH1        | K11968 |
| ENSG00000151746 | -0.139847 | 4.936865 | 0.839043 | 1 BICD1        | K18739 |
| ENSG00000122547 | 0.220806  | 1.344091 | 0.839045 | 1 EEPD1        | -      |
| ENSG00000250320 | 0.220806  | 1.344091 | 0.839045 | 1 CTD-2269F5.1 | -      |
| ENSG00000125864 | 0.182504  | 1.36357  | 0.839045 | 1 BFSP1        | K10378 |
| ENSG00000128563 | 0.182504  | 1.36357  | 0.839045 | 1 PRKRIP1      | K09228 |
| ENSG00000010256 | 0.133237  | 8.38027  | 0.83906  | 1 UQCRC1       | K00414 |
| ENSG00000122965 | -0.134853 | 5.022951 | 0.839145 | 1 RBM19        | K14787 |
| ENSG00000010810 | 0.133517  | 7.634    | 0.839155 | 1 FYN          | K05703 |
| ENSG00000133401 | 0.172839  | 2.424021 | 0.839163 | 1 PDZD2        | -      |
| ENSG00000141391 | -0.146709 | 2.427398 | 0.839163 | 1 SLMO1        | -      |
| ENSG00000160799 | 0.142185  | 4.473588 | 0.839278 | 1 CCDC12       | K12871 |
| ENSG00000198408 | 0.133418  | 7.559422 | 0.83933  | 1 MGEA5        | K15719 |
| ENSG00000172244 | -0.135411 | 5.94527  | 0.839385 | 1 C5orf34      | -      |
| ENSG00000103266 | -0.133896 | 7.03047  | 0.83941  | 1 STUB1        | K09561 |
| ENSG0000015532  | -0.135645 | 5.628352 | 0.839443 | 1 XYLT2        | K00771 |
| ENSG00000105171 | -0.135479 | 5.390998 | 0.83952  | 1 POP4         | K03538 |
| ENSG00000248527 | 0.13273   | 8.500373 | 0.839616 | 1 MTATP6P1     | K02126 |
| ENSG00000226084 | 0.138544  | 5.107482 | 0.83963  | 1 RP4-706A16.3 | K02880 |
| ENSG00000095319 | -0.134195 | 6.622927 | 0.839631 | 1 NUP188       | K14311 |

|                 |           |           |          |                  |        |
|-----------------|-----------|-----------|----------|------------------|--------|
| ENSG00000040633 | -0.134594 | 6.35117   | 0.839643 | 1 PHF23          | -      |
| ENSG00000177156 | 0.133313  | 7.330476  | 0.839648 | 1 TALDO1         | K00616 |
| ENSG00000174151 | -0.171779 | 2.861545  | 0.839662 | 1 CYB561D1       | -      |
| ENSG00000197879 | 0.132843  | 7.87998   | 0.839793 | 1 MYO1C          | K10356 |
| ENSG00000103363 | 0.13308   | 7.446217  | 0.839824 | 1 TCEB2          | K03873 |
| ENSG00000106211 | 0.132209  | 9.53767   | 0.839939 | 1 HSPB1          | K04455 |
| ENSG00000136715 | 0.135427  | 5.293527  | 0.839944 | 1 SAP130         | K19192 |
| ENSG00000181938 | -0.140584 | 4.70615   | 0.840019 | 1 GINS3          | -      |
| ENSG00000100979 | -0.536946 | -0.330685 | 0.840166 | 1 PLTP           | K08761 |
| ENSG00000114670 | -0.536946 | -0.330685 | 0.840166 | 1 NEK11          | K08857 |
| ENSG00000130711 | -0.536946 | -0.330685 | 0.840166 | 1 PRDM12         | -      |
| ENSG00000159714 | -0.536946 | -0.330685 | 0.840166 | 1 ZDHHC1         | K18932 |
| ENSG00000170379 | -0.536946 | -0.330685 | 0.840166 | 1 FAM115C        | -      |
| ENSG00000172478 | -0.536946 | -0.330685 | 0.840166 | 1 C2orf54        | K00757 |
| ENSG00000176472 | -0.536946 | -0.330685 | 0.840166 | 1 ZNF575         | K17725 |
| ENSG00000177483 | -0.536946 | -0.330685 | 0.840166 | 1 RBM44          | -      |
| ENSG00000179528 | -0.536946 | -0.330685 | 0.840166 | 1 LBX2           | K09353 |
| ENSG00000203836 | -0.536946 | -0.330685 | 0.840166 | 1 NBPF24         | -      |
| ENSG00000213225 | -0.536946 | -0.330685 | 0.840166 | 1 AC018804.7     | K14833 |
| ENSG00000227496 | -0.536946 | -0.330685 | 0.840166 | 1 RP11-145A3.1   | -      |
| ENSG00000228307 | -0.536946 | -0.330685 | 0.840166 | 1 OR2S1P         | K04257 |
| ENSG00000234290 | -0.536946 | -0.330685 | 0.840166 | 1 AC116366.6     | -      |
| ENSG00000242445 | -0.536946 | -0.330685 | 0.840166 | 1 RPL7AP11       | K02936 |
| ENSG00000256885 | -0.536946 | -0.330685 | 0.840166 | 1 AP001877.1     | -      |
| ENSG00000258568 | -0.536946 | -0.330685 | 0.840166 | 1 RHOQP1         | K07194 |
| ENSG00000259715 | -0.536946 | -0.330685 | 0.840166 | 1 CTD-3110H11.1  | -      |
| ENSG00000261533 | -0.536946 | -0.330685 | 0.840166 | 1 RP11-15N24.4   | -      |
| ENSG00000261889 | -0.536946 | -0.330685 | 0.840166 | 1 RP11-473M20.16 | -      |
| ENSG00000266992 | -0.536946 | -0.330685 | 0.840166 | 1 DHX40P1        | K18711 |
| ENSG00000267913 | -0.536946 | -0.330685 | 0.840166 | 1 AP001055.1     | -      |
| ENSG00000100100 | 0.446749  | -0.364163 | 0.840166 | 1 PIK3IP1        | K12581 |
| ENSG00000115602 | 0.446749  | -0.364163 | 0.840166 | 1 IL1RL1         | K05171 |
| ENSG00000164532 | 0.446749  | -0.364163 | 0.840166 | 1 TBX20          | K10185 |
| ENSG00000180764 | 0.446749  | -0.364163 | 0.840166 | 1 PIPSL          | K00889 |
| ENSG00000205639 | 0.446749  | -0.364163 | 0.840166 | 1 MFSD2B         | -      |
| ENSG00000205871 | 0.446749  | -0.364163 | 0.840166 | 1 RPS3AP47       | K02984 |
| ENSG00000231806 | 0.446749  | -0.364163 | 0.840166 | 1 PCAT7          | -      |
| ENSG00000232648 | 0.446749  | -0.364163 | 0.840166 | 1 RP11-367N14.2  | -      |
| ENSG00000234936 | 0.446749  | -0.364163 | 0.840166 | 1 AC010883.5     | -      |
| ENSG00000238054 | 0.446749  | -0.364163 | 0.840166 | 1 RP11-316I3.2   | -      |
| ENSG00000243696 | 0.446749  | -0.364163 | 0.840166 | 1 RP5-966M1.6    | -      |
| ENSG00000259515 | 0.446749  | -0.364163 | 0.840166 | 1 RP11-365N19.2  | -      |
| ENSG00000261840 | 0.446749  | -0.364163 | 0.840166 | 1 RP11-146F11.1  | -      |
| ENSG00000049249 | -0.413226 | -0.399295 | 0.840166 | 1 TNFRSF9        | K05146 |
| ENSG00000105650 | -0.413226 | -0.399295 | 0.840166 | 1 PDE4C          | K13293 |
| ENSG00000126500 | -0.413226 | -0.399295 | 0.840166 | 1 FLRT1          | K16362 |
| ENSG00000136040 | -0.413226 | -0.399295 | 0.840166 | 1 PLXNC1         | K06572 |
| ENSG00000144642 | -0.413226 | -0.399295 | 0.840166 | 1 RBMS3          | -      |
| ENSG00000157306 | -0.413226 | -0.399295 | 0.840166 | 1 RP11-66N24.4   | -      |
| ENSG00000179304 | -0.413226 | -0.399295 | 0.840166 | 1 FAM156B        | -      |
| ENSG00000185044 | -0.413226 | -0.399295 | 0.840166 | 1 RP11-435B5.4   | -      |
| ENSG00000198326 | -0.413226 | -0.399295 | 0.840166 | 1 TMEM239        | -      |
| ENSG00000223947 | -0.413226 | -0.399295 | 0.840166 | 1 AC016738.4     | -      |
| ENSG00000224046 | -0.413226 | -0.399295 | 0.840166 | 1 AC005076.5     | -      |
| ENSG00000228486 | -0.413226 | -0.399295 | 0.840166 | 1 LINC01125      | -      |
| ENSG00000260633 | -0.413226 | -0.399295 | 0.840166 | 1 RP11-375I20.6  | -      |
| ENSG00000260833 | -0.413226 | -0.399295 | 0.840166 | 1 AC124789.1     | -      |
| ENSG00000272899 | -0.413226 | -0.399295 | 0.840166 | 1 RP11-309L24.9  | -      |

|                 |           |           |          |                 |        |
|-----------------|-----------|-----------|----------|-----------------|--------|
| ENSG00000273055 | -0.413226 | -0.399295 | 0.840166 | 1 CTB-13F3.1    | -      |
| ENSG00000138336 | -0.164276 | 2.169694  | 0.840181 | 1 TET1          | K13097 |
| ENSG00000188283 | -0.164276 | 2.169694  | 0.840181 | 1 ZNF383        | K09228 |
| ENSG00000110344 | 0.160487  | 2.156094  | 0.840181 | 1 UBE4A         | K10596 |
| ENSG00000232389 | 0.160487  | 2.156094  | 0.840181 | 1 RP11-134K13.2 | K00802 |
| ENSG00000167720 | -0.146472 | 3.893575  | 0.840299 | 1 SRR           | K12235 |
| ENSG00000186815 | -0.135242 | 5.886473  | 0.84035  | 1 TPCN1         | K16896 |
| ENSG00000110237 | 0.138955  | 4.94603   | 0.84036  | 1 ARHGEF17      | -      |
| ENSG00000135392 | 0.135996  | 4.947462  | 0.84036  | 1 DNAJC14       | K09534 |
| ENSG00000109323 | -0.136951 | 5.716844  | 0.84042  | 1 MANBA         | K01192 |
| ENSG00000177595 | -0.14217  | 4.360604  | 0.840451 | 1 PIDD          | K10130 |
| ENSG00000169738 | -0.136374 | 5.864823  | 0.840458 | 1 DCXR          | K03331 |
| ENSG00000237438 | 0.151836  | 2.664905  | 0.840489 | 1 CECR7         | -      |
| ENSG00000213139 | -0.254846 | 0.742418  | 0.84052  | 1 CRYGS         | K16810 |
| ENSG00000123411 | 0.214295  | 0.706746  | 0.84052  | 1 IKZF4         | K09220 |
| ENSG00000198780 | 0.214295  | 0.706746  | 0.84052  | 1 FAM169A       | -      |
| ENSG00000236242 | 0.214295  | 0.706746  | 0.84052  | 1 MYO16-AS1     | -      |
| ENSG00000257605 | 0.214295  | 0.706746  | 0.84052  | 1 RP11-680A11.5 | -      |
| ENSG00000271862 | 0.214295  | 0.706746  | 0.84052  | 1 RP11-343L5.2  | -      |
| ENSG00000065882 | -0.137959 | 4.90503   | 0.84057  | 1 TBC1D1        | K18341 |
| ENSG00000184009 | -0.133145 | 6.759454  | 0.84067  | 1 ACTG1         | K05692 |
| ENSG00000119899 | 0.134114  | 5.718761  | 0.840676 | 1 SLC17A5       | K12301 |
| ENSG00000166971 | 0.144336  | 3.338065  | 0.84068  | 1 AKTIP         | -      |
| ENSG00000145882 | -0.145989 | 3.802252  | 0.840739 | 1 PCYOX1L       | K05906 |
| ENSG00000161677 | -0.146323 | 4.147166  | 0.840766 | 1 JOSD2         | K15235 |
| ENSG00000166224 | -0.135947 | 4.660063  | 0.840787 | 1 SGPL1         | K01634 |
| ENSG00000156256 | -0.135081 | 5.526486  | 0.840802 | 1 USP16         | K11844 |
| ENSG00000107331 | 0.132752  | 6.859034  | 0.840821 | 1 ABCA2         | K05642 |
| ENSG00000141258 | 0.133604  | 5.959204  | 0.840913 | 1 SGSM2         | -      |
| ENSG00000154639 | 0.133579  | 5.980905  | 0.841018 | 1 CXADR         | K06788 |
| ENSG00000106346 | 0.13598   | 4.81499   | 0.841029 | 1 USP42         | K11855 |
| ENSG00000161533 | 0.136268  | 4.714947  | 0.841044 | 1 ACOX1         | K00232 |
| ENSG00000112592 | -0.139413 | 4.768582  | 0.841282 | 1 TBP           | K03120 |
| ENSG00000227615 | -0.153631 | 3.475803  | 0.841295 | 1 RP11-864N7.2  | K02951 |
| ENSG00000165102 | 0.136788  | 4.550536  | 0.841354 | 1 HGSNAT        | K10532 |
| ENSG00000196417 | -0.156827 | 2.879136  | 0.841457 | 1 ZNF765        | K04614 |
| ENSG00000111319 | 0.143487  | 4.149404  | 0.841515 | 1 SCNN1A        | K04824 |
| ENSG0000014919  | -0.135485 | 5.920881  | 0.841583 | 1 COX15         | K02259 |
| ENSG00000198892 | 0.168429  | 1.813508  | 0.841624 | 1 SHISA4        | -      |
| ENSG00000133103 | -0.1397   | 4.960988  | 0.841656 | 1 COG6          | -      |
| ENSG00000125611 | -0.141093 | 4.369105  | 0.841746 | 1 CHCHD5        | -      |
| ENSG00000163755 | -0.132807 | 6.133716  | 0.841861 | 1 HPS3          | -      |
| ENSG00000119953 | -0.132854 | 5.83058   | 0.841869 | 1 SMNDC1        | K12839 |
| ENSG00000104450 | -0.134944 | 4.724479  | 0.842055 | 1 SPAG1         | -      |
| ENSG00000131188 | 0.141733  | 4.304025  | 0.842124 | 1 PRR7          | -      |
| ENSG00000169180 | -0.131735 | 6.901141  | 0.842151 | 1 XPO6          | -      |
| ENSG00000001036 | -0.13149  | 7.12174   | 0.842171 | 1 FUCA2         | K01206 |
| ENSG00000104835 | 0.156735  | 3.056053  | 0.842194 | 1 SARS2         | K01875 |
| ENSG00000101444 | -0.130793 | 7.935705  | 0.84229  | 1 AHCY          | K01251 |
| ENSG00000090054 | -0.132275 | 6.388277  | 0.84233  | 1 SPTLC1        | K00654 |
| ENSG00000118482 | 0.131733  | 6.5933    | 0.842401 | 1 PHF3          | -      |
| ENSG00000185946 | -0.14404  | 4.001488  | 0.842421 | 1 RNPC3         | K13157 |
| ENSG00000203880 | -0.138338 | 4.828424  | 0.842442 | 1 PCMTD2        | -      |
| ENSG00000164494 | 0.14212   | 3.482464  | 0.842471 | 1 PDSS2         | K12505 |
| ENSG00000108828 | 0.130469  | 8.158616  | 0.842472 | 1 VAT1          | -      |
| ENSG00000163798 | -0.134947 | 5.211009  | 0.842611 | 1 SLC4A1AP      | K01368 |
| ENSG00000164252 | -0.134661 | 5.514071  | 0.842715 | 1 AGGF1         | -      |
| ENSG00000106009 | -0.131702 | 6.55184   | 0.842718 | 1 BRAT1         | -      |

|                 |           |          |          |                 |        |
|-----------------|-----------|----------|----------|-----------------|--------|
| ENSG00000113810 | 0.130703  | 7.328553 | 0.842763 | 1 SMC4          | K06675 |
| ENSG00000105705 | 0.13756   | 4.924521 | 0.842779 | 1 SUGP1         | K13096 |
| ENSG00000125633 | -0.1335   | 5.389952 | 0.842885 | 1 CCDC93        | -      |
| ENSG0000019549  | -0.134271 | 5.485007 | 0.842903 | 1 SNAI2         | K05706 |
| ENSG00000185800 | 0.137931  | 4.83203  | 0.842908 | 1 DMWD          | -      |
| ENSG00000173559 | -0.137576 | 4.834579 | 0.842908 | 1 NABP1         | -      |
| ENSG00000172046 | -0.134136 | 5.739994 | 0.842945 | 1 USP19         | K11847 |
| ENSG00000138593 | -0.135072 | 5.359316 | 0.843094 | 1 SECISBP2L     | -      |
| ENSG00000145916 | -0.135072 | 5.359316 | 0.843094 | 1 RMND5B        | K15696 |
| ENSG00000124164 | 0.133818  | 5.934304 | 0.843116 | 1 VAPB          | K10707 |
| ENSG00000155304 | -0.131533 | 6.385661 | 0.843218 | 1 HSPA13        | K09491 |
| ENSG00000182923 | -0.14341  | 4.449559 | 0.843228 | 1 CEP63         | K16763 |
| ENSG00000111885 | -0.138696 | 4.245125 | 0.843234 | 1 MAN1A1        | K01230 |
| ENSG00000163517 | -0.151308 | 3.369478 | 0.843243 | 1 HDAC11        | K11418 |
| ENSG00000132669 | -0.134645 | 5.326924 | 0.843313 | 1 RIN2          | -      |
| ENSG00000143158 | -0.132047 | 5.937431 | 0.843333 | 1 MPC2          | -      |
| ENSG00000083444 | 0.129685  | 8.237209 | 0.84337  | 1 PLOD1         | K00473 |
| ENSG00000141522 | -0.130553 | 6.989682 | 0.843446 | 1 ARHGDI1       | K12462 |
| ENSG00000162430 | -0.135721 | 5.144414 | 0.843457 | 1 SEPN1         | K12581 |
| ENSG00000037749 | -0.131429 | 5.692477 | 0.843536 | 1 MFAP3         | -      |
| ENSG00000129071 | -0.131287 | 6.369849 | 0.84354  | 1 MBD4          | K10801 |
| ENSG00000197563 | 0.133512  | 5.18191  | 0.843571 | 1 PIGN          | K05285 |
| ENSG00000117143 | 0.130129  | 7.145096 | 0.843625 | 1 UAP1          | K00972 |
| ENSG00000108848 | 0.129349  | 8.448915 | 0.843676 | 1 LUC7L3        | -      |
| ENSG00000132823 | 0.131961  | 5.984372 | 0.843677 | 1 OSER1         | -      |
| ENSG00000005075 | 0.133596  | 5.104944 | 0.843721 | 1 POLR2J        | K03008 |
| ENSG00000122729 | -0.131037 | 6.424961 | 0.843734 | 1 ACO1          | K01681 |
| ENSG00000119203 | -0.13103  | 5.871584 | 0.843794 | 1 CPSF3         | K14403 |
| ENSG00000163479 | 0.129558  | 7.722243 | 0.843819 | 1 SSR2          | K13250 |
| ENSG00000130768 | -0.204233 | 1.436702 | 0.843823 | 1 SMPDL3B       | K01128 |
| ENSG00000127124 | -0.171934 | 1.418457 | 0.843823 | 1 HIVEP3        | K09239 |
| ENSG00000230487 | -0.171934 | 1.418457 | 0.843823 | 1 PSMG3-AS1     | -      |
| ENSG00000125166 | -0.12972  | 7.551328 | 0.843858 | 1 GOT2          | K14455 |
| ENSG00000168827 | -0.130377 | 5.987339 | 0.843885 | 1 GFM1          | K02355 |
| ENSG00000134058 | 0.152757  | 2.465002 | 0.843897 | 1 CDK7          | K02202 |
| ENSG00000146530 | 0.152757  | 2.465002 | 0.843897 | 1 VWDE          | -      |
| ENSG00000115942 | -0.130619 | 5.670272 | 0.843976 | 1 ORC2          | K02604 |
| ENSG00000065600 | -0.134631 | 4.519974 | 0.843993 | 1 TMEM206       | -      |
| ENSG00000269609 | 0.142825  | 3.234711 | 0.844158 | 1 RP11-18114.10 | -      |
| ENSG00000162599 | 0.131957  | 5.776739 | 0.84424  | 1 NFIA          | K09168 |
| ENSG00000115520 | 0.137088  | 4.844306 | 0.844288 | 1 COQ10B        | K18588 |
| ENSG00000160691 | 0.129334  | 7.425416 | 0.844313 | 1 SHC1          | K06279 |
| ENSG00000219545 | -0.135022 | 4.696014 | 0.844411 | 1 RPA3-AS1      | -      |
| ENSG00000121644 | 0.130318  | 6.36957  | 0.844449 | 1 DESI2         | -      |
| ENSG00000179933 | 0.130147  | 5.969039 | 0.844458 | 1 C14orf119     | K12875 |
| ENSG00000142396 | 0.138309  | 3.832781 | 0.844467 | 1 ERVK3-1       | -      |
| ENSG00000169258 | 0.1349    | 4.522183 | 0.844563 | 1 GPRIN1        | -      |
| ENSG00000174903 | 0.129203  | 7.281936 | 0.844596 | 1 RAB1B         | K07875 |
| ENSG00000204991 | 0.131747  | 5.754964 | 0.844665 | 1 SPIRE2        | K02098 |
| ENSG00000090621 | -0.128669 | 8.076484 | 0.844741 | 1 PABPC4        | K13126 |
| ENSG00000177706 | -0.13479  | 5.27013  | 0.844806 | 1 FAM20C        | -      |
| ENSG00000126602 | -0.128427 | 8.407567 | 0.844857 | 1 TRAP1         | K09488 |
| ENSG00000124789 | -0.129177 | 7.173069 | 0.844873 | 1 NUP153        | K14296 |
| ENSG00000151849 | -0.130493 | 5.306022 | 0.844877 | 1 CENPJ         | K11502 |
| ENSG00000103194 | -0.129642 | 6.697895 | 0.844937 | 1 USP10         | K11841 |
| ENSG00000230234 | 0.136552  | 4.104264 | 0.845016 | 1 RP1-276N6.2   | -      |
| ENSG00000224287 | -0.135822 | 4.109469 | 0.845016 | 1 MSL3P1        | K18403 |
| ENSG00000131748 | 0.130077  | 5.408539 | 0.84507  | 1 STARD3        | -      |

|                 |           |          |          |                |        |
|-----------------|-----------|----------|----------|----------------|--------|
| ENSG00000117748 | -0.129857 | 5.734246 | 0.845103 | 1 RPA2         | K10739 |
| ENSG00000086666 | 0.129436  | 6.556934 | 0.845193 | 1 ZFAND6       | K01555 |
| ENSG00000136152 | -0.135182 | 4.903557 | 0.845276 | 1 COG3         | -      |
| ENSG00000170949 | -0.136146 | 4.339062 | 0.845403 | 1 ZNF160       | -      |
| ENSG00000160410 | 0.129468  | 6.185872 | 0.845433 | 1 SHKBP1       | -      |
| ENSG00000150457 | 0.12989   | 5.274385 | 0.845483 | 1 LATS2        | K08791 |
| ENSG00000164520 | 0.132633  | 5.03974  | 0.845489 | 1 RAET1E       | -      |
| ENSG00000178718 | -0.129864 | 6.148009 | 0.845556 | 1 RPP25        | K14525 |
| ENSG00000177479 | -0.129276 | 6.556512 | 0.8456   | 1 ARIH2        | K17985 |
| ENSG00000164118 | -0.139914 | 4.033919 | 0.84565  | 1 CEP44        | K16761 |
| ENSG00000174744 | -0.13173  | 5.890917 | 0.845799 | 1 BRMS1        | K19196 |
| ENSG00000168175 | -0.128978 | 6.652001 | 0.8458   | 1 MAPK1IP1L    | -      |
| ENSG00000130513 | -0.128726 | 6.336619 | 0.845812 | 1 GDF15        | K05504 |
| ENSG00000088298 | 0.133901  | 5.34949  | 0.845907 | 1 EDEM2        | K10085 |
| ENSG00000173436 | -0.135307 | 4.272572 | 0.84596  | 1 MINOS1       | K17784 |
| ENSG00000172428 | 0.134606  | 4.406944 | 0.846118 | 1 MYEOV2       | -      |
| ENSG00000120334 | -0.131929 | 4.477301 | 0.846186 | 1 CENPL        | K11504 |
| ENSG00000176340 | -0.128487 | 6.722181 | 0.846277 | 1 COX8A        | K02273 |
| ENSG00000124299 | 0.129531  | 5.046402 | 0.846278 | 1 PEPD         | K14213 |
| ENSG00000100902 | -0.130018 | 5.942432 | 0.846283 | 1 PSMA6        | K02730 |
| ENSG00000108239 | 0.136338  | 3.948155 | 0.846357 | 1 TBC1D12      | K17985 |
| ENSG00000197372 | 0.136338  | 3.948155 | 0.846357 | 1 ZNF675       | K09228 |
| ENSG00000102595 | -0.128791 | 5.798658 | 0.846371 | 1 UGGT2        | K11718 |
| ENSG00000170919 | 0.147576  | 2.71931  | 0.846424 | 1 TPT1-AS1     | -      |
| ENSG00000186638 | 0.136085  | 4.033691 | 0.846437 | 1 KIF24        | K10393 |
| ENSG00000129460 | -0.133099 | 5.321452 | 0.846515 | 1 NGDN         | K14765 |
| ENSG00000262944 | -0.1504   | 2.925889 | 0.846609 | 1 RP11-47311.9 | -      |
| ENSG00000139636 | 0.130144  | 4.274948 | 0.846627 | 1 LMBR1L       | -      |
| ENSG00000169018 | -0.129889 | 6.179191 | 0.846668 | 1 FEM1B        | K10349 |
| ENSG00000182752 | -0.13918  | 4.349874 | 0.846677 | 1 PAPPB        | K07762 |
| ENSG00000125657 | 0.12734   | 7.441147 | 0.846682 | 1 TNFSF9       | K05472 |
| ENSG00000170677 | -0.129321 | 5.923782 | 0.84669  | 1 SOCS6        | K10322 |
| ENSG00000152990 | -0.132168 | 5.173847 | 0.84675  | 1 GPR125       | K08462 |
| ENSG00000112679 | 0.137302  | 4.543023 | 0.846803 | 1 DUSP22       | K14165 |
| ENSG00000153071 | 0.127277  | 7.294839 | 0.846885 | 1 DAB2         | K12475 |
| ENSG00000102309 | -0.135754 | 4.717835 | 0.8469   | 1 PIN4         | K09579 |
| ENSG00000183696 | -0.129378 | 5.972061 | 0.846927 | 1 UPP1         | K00757 |
| ENSG00000073111 | 0.12688   | 7.798126 | 0.846969 | 1 MCM2         | K02540 |
| ENSG00000148229 | -0.127252 | 7.205214 | 0.847136 | 1 POLE3        | K02326 |
| ENSG00000107438 | -0.127183 | 7.23141  | 0.847191 | 1 PDLIM1       | -      |
| ENSG00000106290 | 0.128784  | 5.429056 | 0.847195 | 1 TAF6         | K03131 |
| ENSG00000128607 | 0.130691  | 5.493786 | 0.847215 | 1 KLHDC10      | -      |
| ENSG00000096070 | 0.140918  | 4.041655 | 0.847216 | 1 BRPF3        | K11350 |
| ENSG00000255529 | -0.129222 | 5.527438 | 0.847225 | 1 POLR2M       | -      |
| ENSG00000109118 | 0.130504  | 5.556669 | 0.847234 | 1 PHF12        | -      |
| ENSG00000105835 | 0.12661   | 7.83453  | 0.847269 | 1 NAMPT        | K03462 |
| ENSG00000174292 | -0.138491 | 4.283894 | 0.847288 | 1 TNK1         | K08885 |
| ENSG00000151422 | -0.134046 | 4.35627  | 0.847306 | 1 FER          | K08889 |
| ENSG00000117475 | -0.135103 | 4.666977 | 0.847377 | 1 BLZF1        | -      |
| ENSG00000065978 | -0.125902 | 10.12611 | 0.847409 | 1 YBX1         | K09276 |
| ENSG00000164164 | -0.13344  | 5.100371 | 0.847452 | 1 OTUD4        | K13718 |
| ENSG00000164985 | -0.126328 | 8.199384 | 0.847472 | 1 PSIP1        | -      |
| ENSG00000197756 | 0.125943  | 9.292929 | 0.847488 | 1 RPL37A       | K02921 |
| ENSG00000180357 | 0.128505  | 5.528425 | 0.847504 | 1 ZNF609       | K15696 |
| ENSG00000160539 | 0.259601  | 0.781234 | 0.84754  | 1 PPAPDC3      | -      |
| ENSG00000185442 | 0.259601  | 0.781234 | 0.84754  | 1 FAM174B      | -      |
| ENSG00000223477 | 0.259601  | 0.781234 | 0.84754  | 1 LINC00842    | -      |
| ENSG00000241764 | 0.259601  | 0.781234 | 0.84754  | 1 AC002467.7   | -      |

|                 |           |          |          |                 |        |
|-----------------|-----------|----------|----------|-----------------|--------|
| ENSG00000251196 | 0.259601  | 0.781234 | 0.84754  | 1 RP11-54F2.1   | -      |
| ENSG00000258708 | 0.259601  | 0.781234 | 0.84754  | 1 SLC25A21-AS1  | K15110 |
| ENSG00000272142 | -0.232681 | 0.842792 | 0.84754  | 1 RP11-428J1.5  | -      |
| ENSG00000273311 | -0.232681 | 0.842792 | 0.84754  | 1 DGCR11        | -      |
| ENSG00000250159 | 0.201109  | 0.810762 | 0.84754  | 1 RP11-381K20.2 | -      |
| ENSG00000264469 | 0.201109  | 0.810762 | 0.84754  | 1 RP11-173M1.8  | -      |
| ENSG00000127720 | -0.182352 | 0.814313 | 0.84754  | 1 METTL25       | -      |
| ENSG00000171100 | -0.182352 | 0.814313 | 0.84754  | 1 MTM1          | K01108 |
| ENSG00000186275 | -0.182352 | 0.814313 | 0.84754  | 1 NBPF12        | -      |
| ENSG00000229645 | -0.182352 | 0.814313 | 0.84754  | 1 LINC00341     | -      |
| ENSG00000238197 | -0.182352 | 0.814313 | 0.84754  | 1 PAXBP1-AS1    | -      |
| ENSG00000259330 | -0.182352 | 0.814313 | 0.84754  | 1 LINC00984     | -      |
| ENSG00000108298 | 0.125692  | 10.75845 | 0.847577 | 1 RPL19         | K02885 |
| ENSG00000182154 | -0.127234 | 6.149251 | 0.847738 | 1 MRPL41        | K17422 |
| ENSG00000214113 | -0.12787  | 5.885743 | 0.847755 | 1 LYRM4         | -      |
| ENSG00000070882 | -0.128812 | 5.811982 | 0.847761 | 1 OSBPL3        | -      |
| ENSG00000158201 | -0.129834 | 5.705976 | 0.847769 | 1 ABHD3         | K13696 |
| ENSG00000145365 | 0.128916  | 4.72497  | 0.847874 | 1 TIFA          | -      |
| ENSG00000249115 | -0.134267 | 4.673858 | 0.847881 | 1 HAUS5         | K16588 |
| ENSG00000141556 | 0.127296  | 6.451066 | 0.847913 | 1 TBCD          | K15522 |
| ENSG00000157796 | -0.133901 | 4.427258 | 0.847919 | 1 WDR19         | K19671 |
| ENSG00000100504 | -0.126527 | 7.242165 | 0.847963 | 1 PYGL          | K00688 |
| ENSG00000104529 | 0.125502  | 9.487036 | 0.847974 | 1 EEF1D         | K15410 |
| ENSG00000139793 | 0.12652   | 7.101648 | 0.847979 | 1 MBNL2         | K14943 |
| ENSG00000173698 | 0.128277  | 5.437181 | 0.848088 | 1 GPR64         | K08451 |
| ENSG00000163694 | 0.128299  | 5.225965 | 0.848156 | 1 RBM47         | K04613 |
| ENSG00000101181 | 0.130697  | 5.187945 | 0.848169 | 1 MTG2          | K03979 |
| ENSG00000117650 | 0.126365  | 7.082996 | 0.848183 | 1 NEK2          | K08857 |
| ENSG00000138801 | -0.127395 | 5.108005 | 0.848198 | 1 PAPSS1        | K13811 |
| ENSG00000078140 | -0.126763 | 6.800164 | 0.848221 | 1 UBE2K         | K04649 |
| ENSG00000146830 | -0.127174 | 6.233216 | 0.848249 | 1 GIGYF1        | K18730 |
| ENSG00000172336 | -0.12712  | 6.213269 | 0.848257 | 1 POP7          | K14527 |
| ENSG00000154001 | 0.128045  | 5.708722 | 0.848261 | 1 PPP2R5E       | K11584 |
| ENSG00000164941 | -0.126727 | 6.174958 | 0.848273 | 1 INTS8         | K13145 |
| ENSG00000221990 | -0.16251  | 2.748333 | 0.848305 | 1 C5orf55       | K17985 |
| ENSG00000180776 | 0.15948   | 2.738791 | 0.848305 | 1 ZDHHC20       | K18932 |
| ENSG00000162032 | 0.154008  | 2.232932 | 0.848413 | 1 SPSB3         | K10345 |
| ENSG00000173141 | -0.131021 | 5.375242 | 0.848418 | 1 MRP63         | K17985 |
| ENSG00000128039 | 0.132976  | 4.431565 | 0.84851  | 1 SRD5A3        | K12345 |
| ENSG00000143337 | -0.126591 | 6.031569 | 0.848535 | 1 TOR1AIP1      | -      |
| ENSG00000072786 | -0.131009 | 4.938269 | 0.848685 | 1 STK10         | K08837 |
| ENSG00000101624 | -0.136898 | 4.142121 | 0.848693 | 1 CEP76         | K16457 |
| ENSG00000101220 | -0.128657 | 5.716018 | 0.848749 | 1 C20orf27      | -      |
| ENSG00000173511 | -0.130508 | 5.343208 | 0.848752 | 1 VEGFB         | K16858 |
| ENSG00000138346 | -0.130252 | 4.790884 | 0.848794 | 1 DNA2          | K10742 |
| ENSG00000012061 | -0.128094 | 5.631896 | 0.848815 | 1 ERCC1         | K10849 |
| ENSG00000112282 | -0.136297 | 3.97377  | 0.848816 | 1 MED23         | K15166 |
| ENSG00000144231 | -0.127784 | 5.847433 | 0.848878 | 1 POLR2D        | K03012 |
| ENSG00000161057 | -0.126112 | 6.879365 | 0.848889 | 1 PSMC2         | K03061 |
| ENSG00000113638 | 0.125921  | 5.770314 | 0.848944 | 1 TTC33         | -      |
| ENSG00000175029 | 0.125777  | 6.981779 | 0.848997 | 1 CTBP2         | K04496 |
| ENSG00000179918 | -0.126581 | 5.922342 | 0.84903  | 1 SEPHS2        | K01008 |
| ENSG00000181220 | -0.136508 | 4.50462  | 0.849036 | 1 ZNF746        | K09228 |
| ENSG00000145833 | 0.125292  | 7.491263 | 0.84909  | 1 DDX46         | K12811 |
| ENSG00000131669 | 0.127464  | 5.797396 | 0.849151 | 1 NINJ1         | -      |
| ENSG00000104897 | -0.128698 | 5.482068 | 0.849228 | 1 SF3A2         | K12826 |
| ENSG00000134533 | 0.138276  | 3.422426 | 0.849306 | 1 RERG          | K07855 |
| ENSG00000008853 | -0.128852 | 5.578779 | 0.849398 | 1 RHOTB2        | K07868 |



|                 |           |          |          |             |        |
|-----------------|-----------|----------|----------|-------------|--------|
| ENSG00000141542 | 0.133843  | 4.144541 | 0.849407 | 1 RAB40B    | K17985 |
| ENSG00000108679 | 0.124278  | 9.384267 | 0.849463 | 1 LGALS3BP  | K17300 |
| ENSG00000196792 | 0.128085  | 4.569189 | 0.849514 | 1 STRN3     | K17608 |
| ENSG00000103591 | -0.126116 | 6.467202 | 0.849522 | 1 AAGAB     | -      |
| ENSG00000092820 | 0.124433  | 8.103806 | 0.849719 | 1 EZR       | K08007 |
| ENSG00000197114 | 0.154145  | 2.952278 | 0.849863 | 1 ZGPAT     | -      |
| ENSG00000188827 | 0.142189  | 2.958242 | 0.849863 | 1 SLX4      | K10484 |
| ENSG00000169118 | -0.139855 | 4.235859 | 0.849989 | 1 CSNK1G1   | K08958 |
| ENSG00000108469 | -0.132401 | 4.902083 | 0.85     | 1 RECQL5    | K10902 |
| ENSG00000083535 | -0.126957 | 5.355034 | 0.850001 | 1 PIBF1     | K16538 |
| ENSG00000140391 | 0.124273  | 7.747961 | 0.850121 | 1 TSPAN3    | K17293 |
| ENSG00000001461 | -0.14646  | 2.767321 | 0.850141 | 1 NIPAL3    | K04613 |
| ENSG00000126767 | 0.126876  | 5.554802 | 0.850247 | 1 ELK1      | K04375 |
| ENSG00000155090 | 0.124645  | 7.05719  | 0.850266 | 1 KLF10     | K09209 |
| ENSG00000171109 | -0.125675 | 6.3442   | 0.850275 | 1 MFN1      | K06030 |
| ENSG00000139641 | 0.124619  | 7.035278 | 0.850321 | 1 ESYT1     | -      |
| ENSG00000063438 | 0.125072  | 6.551783 | 0.850407 | 1 AHRR      | K09094 |
| ENSG00000108474 | 0.134066  | 3.981894 | 0.850412 | 1 PIGL      | K03434 |
| ENSG00000100359 | -0.124784 | 6.254046 | 0.85044  | 1 SGSM3     | -      |
| ENSG00000130635 | 0.123677  | 8.455522 | 0.850462 | 1 COL5A1    | K19721 |
| ENSG00000159461 | 0.124123  | 6.234458 | 0.850476 | 1 AMFR      | K10636 |
| ENSG00000090686 | 0.125151  | 6.436441 | 0.850495 | 1 USP48     | K11858 |
| ENSG00000134899 | -0.128849 | 4.855895 | 0.850515 | 1 ERCC5     | K10846 |
| ENSG00000159086 | -0.12495  | 6.292577 | 0.850531 | 1 PAXBP1    | K13211 |
| ENSG00000130340 | 0.125123  | 6.402607 | 0.850585 | 1 SNX9      | K17923 |
| ENSG00000197312 | -0.129063 | 5.002572 | 0.850647 | 1 DDI2      | K11885 |
| ENSG00000107937 | 0.123668  | 8.033694 | 0.850673 | 1 GTPBP4    | K06943 |
| ENSG00000166741 | 0.123627  | 7.909433 | 0.850792 | 1 NNMT      | K00541 |
| ENSG00000167925 | -0.139141 | 4.164314 | 0.850816 | 1 GHDC      | -      |
| ENSG00000101052 | 0.132544  | 4.164265 | 0.850816 | 1 IFT52     | K19681 |
| ENSG00000110075 | 0.124966  | 6.370084 | 0.850827 | 1 PPP6R3    | K15501 |
| ENSG00000022277 | -0.125088 | 6.386728 | 0.850894 | 1 RTFDC1    | -      |
| ENSG00000154727 | -0.129126 | 5.048327 | 0.850939 | 1 GABPA     | K09441 |
| ENSG00000225137 | 0.170605  | 2.259966 | 0.850972 | 1 DYNC1I2P1 | K10415 |
| ENSG00000169062 | -0.124925 | 6.406498 | 0.851052 | 1 UPF3A     | K14328 |
| ENSG00000158526 | 0.128887  | 5.216554 | 0.85127  | 1 TSR2      | K14800 |
| ENSG00000162458 | 0.135718  | 3.573821 | 0.851289 | 1 FBLIM1    | K17985 |
| ENSG0000010072  | 0.131911  | 4.247476 | 0.851315 | 1 SPRTN     | -      |
| ENSG00000056097 | -0.123553 | 7.42162  | 0.851343 | 1 ZFR       | K13203 |
| ENSG00000196505 | -0.131011 | 5.009397 | 0.85143  | 1 GDAP2     | -      |
| ENSG00000249565 | -0.131011 | 5.009397 | 0.85143  | 1 SERBP1P5  | K13199 |
| ENSG00000049245 | -0.124299 | 6.575496 | 0.851504 | 1 VAMP3     | K13505 |
| ENSG00000119772 | -0.175657 | 1.949173 | 0.851626 | 1 DNMT3A    | K17398 |
| ENSG00000113384 | 0.12261   | 8.330774 | 0.851793 | 1 GOLPH3    | K15620 |
| ENSG00000150433 | -0.150006 | 3.31322  | 0.851976 | 1 TMEM218   | -      |
| ENSG00000148834 | -0.123487 | 6.915406 | 0.851977 | 1 GSTO1     | K00799 |
| ENSG00000151093 | -0.139016 | 3.701293 | 0.85198  | 1 OXSM      | K09458 |
| ENSG00000126790 | -0.132356 | 3.910997 | 0.852251 | 1 L3HYPDH   | K18384 |
| ENSG00000145919 | -0.123462 | 6.737068 | 0.852253 | 1 BOD1      | -      |
| ENSG00000135763 | -0.132588 | 4.716154 | 0.852273 | 1 URB2      | K14862 |
| ENSG00000125826 | -0.124328 | 6.152958 | 0.852275 | 1 RBCK1     | K10630 |
| ENSG00000167487 | -0.146694 | 3.58567  | 0.852323 | 1 KLHL26    | K10463 |
| ENSG00000183011 | 0.124075  | 5.952825 | 0.85233  | 1 LSMD1     | -      |
| ENSG00000132589 | -0.12278  | 7.280183 | 0.852404 | 1 FLOT2     | K07192 |
| ENSG00000132646 | -0.122266 | 8.05789  | 0.852413 | 1 PCNA      | K04802 |
| ENSG00000105552 | -0.122881 | 6.154808 | 0.852451 | 1 BCAT2     | K00826 |
| ENSG00000112514 | 0.137253  | 4.094017 | 0.852457 | 1 CUTA      | K03926 |
| ENSG00000165480 | -0.125822 | 5.696714 | 0.852495 | 1 SKA3      | -      |

|                 |           |           |          |                  |              |
|-----------------|-----------|-----------|----------|------------------|--------------|
| ENSG00000172164 | -0.138423 | 3.81155   | 0.852565 | 1 SNTB1          | -            |
| ENSG00000166507 | -0.193049 | 1.499661  | 0.852572 | 1 NDST2          | K02577       |
| ENSG00000260193 | -0.193049 | 1.499661  | 0.852572 | 1 RP11-83N9.5    | -            |
| ENSG00000266903 | -0.193049 | 1.499661  | 0.852572 | 1 CTB-171A8.1    | -            |
| ENSG00000111727 | 0.161444  | 2.549503  | 0.852577 | 1 HCFC2          | K14966       |
| ENSG00000135643 | 0.136043  | 3.454833  | 0.852725 | 1 KCNMB4         | K04941       |
| ENSG00000163918 | -0.122614 | 7.105003  | 0.85279  | 1 RFC4           | K10755       |
| ENSG00000116857 | 0.122521  | 7.070954  | 0.852791 | 1 TME9           | -            |
| ENSG00000155329 | -0.125875 | 4.828378  | 0.852831 | 1 ZCCHC10        | -            |
| ENSG00000176105 | 0.1223    | 7.27427   | 0.852854 | 1 YES1           | K05705       |
| ENSG00000107854 | 0.123912  | 6.276953  | 0.852891 | 1 TNKS2          | K10799       |
| ENSG00000106100 | -0.13095  | 3.711254  | 0.852925 | 1 NOD1           | K08727       |
| ENSG00000103043 | -0.124947 | 5.235635  | 0.852938 | 1 VAC14          | K15305       |
| ENSG00000163001 | 0.125353  | 5.484995  | 0.85296  | 1 CCDC104        | K04613       |
| ENSG00000133195 | -0.141516 | 2.99331   | 0.852982 | 1 SLC39A11       | K14717       |
| ENSG00000139990 | 0.129878  | 4.479579  | 0.853079 | 1 DCAF5          | K11800       |
| ENSG00000170871 | 0.125843  | 4.605703  | 0.853153 | 1 KIAA0232       | -            |
| ENSG00000122545 | -0.122044 | 7.412138  | 0.853157 | 1                | 7-Sep K16944 |
| ENSG00000141956 | 0.127797  | 5.156307  | 0.853229 | 1 PRDM15         | -            |
| ENSG00000159479 | -0.123541 | 6.223873  | 0.853265 | 1 MED8           | K15129       |
| ENSG00000117523 | 0.122015  | 7.188124  | 0.853277 | 1 PRRC2C         | -            |
| ENSG00000114166 | 0.127121  | 3.592262  | 0.853342 | 1 KAT2B          | K06062       |
| ENSG00000100395 | -0.122741 | 5.647723  | 0.853432 | 1 L3MBTL2        | K17985       |
| ENSG00000168137 | 0.123483  | 6.121767  | 0.853484 | 1 SETD5          | -            |
| ENSG00000164754 | 0.120898  | 9.385887  | 0.853514 | 1 RAD21          | K06670       |
| ENSG00000121542 | -0.13555  | 4.193325  | 0.853558 | 1 SEC22A         | K08520       |
| ENSG00000177337 | 0.133627  | 3.710825  | 0.853859 | 1 DLGAP1-AS1     | -            |
| ENSG00000162396 | 0.126647  | 3.714271  | 0.853859 | 1 PARS2          | K01881       |
| ENSG00000147536 | 0.12595   | 4.109461  | 0.853889 | 1 GINS4          | K10735       |
| ENSG00000125347 | 0.125237  | 4.674332  | 0.853911 | 1 IRF1           | K09444       |
| ENSG00000171606 | -0.124218 | 4.78769   | 0.853914 | 1 ZNF274         | K12458       |
| ENSG00000134278 | 0.128096  | 4.88945   | 0.853916 | 1 SPIRE1         | K02098       |
| ENSG00000136870 | -0.124696 | 4.89176   | 0.853916 | 1 ZNF189         | K09228       |
| ENSG00000103326 | 0.12203   | 6.634483  | 0.853916 | 1 CAPN15         | K08582       |
| ENSG00000134283 | -0.122097 | 6.704662  | 0.853932 | 1 PPHLN1         | -            |
| ENSG00000214309 | 0.243873  | 0.880319  | 0.85396  | 1 MBLAC1         | -            |
| ENSG00000257576 | 0.243873  | 0.880319  | 0.85396  | 1 RP11-153M3.1   | K04077       |
| ENSG00000268362 | 0.243873  | 0.880319  | 0.85396  | 1 CTD-2017D11.1  | -            |
| ENSG00000160688 | -0.122354 | 6.465231  | 0.854014 | 1 FLAD1          | K06641       |
| ENSG00000196591 | -0.120833 | 8.24809   | 0.854026 | 1 HDAC2          | K06067       |
| ENSG00000167315 | -0.122394 | 6.391965  | 0.854099 | 1 ACAA2          | K07508       |
| ENSG00000176208 | 0.124902  | 4.941795  | 0.854118 | 1 ATAD5          | -            |
| ENSG00000143319 | -0.122649 | 5.768428  | 0.854153 | 1 ISG20L2        | K18329       |
| ENSG00000183337 | 0.121587  | 6.842259  | 0.85417  | 1 BCOR           | -            |
| ENSG00000149269 | -0.122563 | 5.466291  | 0.854204 | 1 PAK1           | K04409       |
| ENSG00000165264 | -0.124881 | 5.564958  | 0.854317 | 1 NDUFB6         | K03962       |
| ENSG00000081665 | -0.334757 | -0.186789 | 0.854437 | 1 ZNF506         | K09228       |
| ENSG00000130997 | -0.334757 | -0.186789 | 0.854437 | 1 POLN           | K16618       |
| ENSG00000142621 | -0.334757 | -0.186789 | 0.854437 | 1 FHAD1          | K12581       |
| ENSG00000158023 | -0.334757 | -0.186789 | 0.854437 | 1 WDR66          | -            |
| ENSG00000170425 | -0.334757 | -0.186789 | 0.854437 | 1 ADORA2B        | K04267       |
| ENSG00000181722 | -0.334757 | -0.186789 | 0.854437 | 1 ZBTB20         | -            |
| ENSG00000185245 | -0.334757 | -0.186789 | 0.854437 | 1 GP1BA          | K06261       |
| ENSG00000228933 | -0.334757 | -0.186789 | 0.854437 | 1 RP11-268G12.1  | -            |
| ENSG00000256304 | -0.334757 | -0.186789 | 0.854437 | 1 RP11-512M8.3   | K10421       |
| ENSG00000260219 | -0.334757 | -0.186789 | 0.854437 | 1 RP11-347C12.10 | -            |
| ENSG00000261801 | -0.334757 | -0.186789 | 0.854437 | 1 LOXL1-AS1      | -            |
| ENSG00000082196 | 0.297395  | -0.296143 | 0.854437 | 1 CIQTNF3        | -            |

|                 |           |           |          |                   |        |
|-----------------|-----------|-----------|----------|-------------------|--------|
| ENSG00000169203 | 0.297395  | -0.296143 | 0.854437 | 1 RP11-231C14.4   | -      |
| ENSG00000178301 | 0.297395  | -0.296143 | 0.854437 | 1 AQP11           | K09870 |
| ENSG00000179899 | 0.297395  | -0.296143 | 0.854437 | 1 PHC1P1          | K11456 |
| ENSG00000184348 | 0.297395  | -0.296143 | 0.854437 | 1 HIST1H2AK       | K11251 |
| ENSG00000213228 | 0.297395  | -0.296143 | 0.854437 | 1 RPL12P38        | K02870 |
| ENSG00000225335 | 0.297395  | -0.296143 | 0.854437 | 1 XXbac-B476C20.9 | -      |
| ENSG00000228925 | 0.297395  | -0.296143 | 0.854437 | 1 AC016722.4      | -      |
| ENSG00000232480 | 0.297395  | -0.296143 | 0.854437 | 1 RP11-224O19.2   | -      |
| ENSG00000246889 | 0.297395  | -0.296143 | 0.854437 | 1 AP000487.5      | -      |
| ENSG00000252419 | 0.297395  | -0.296143 | 0.854437 | 1 RMRPP2          | -      |
| ENSG00000261662 | 0.297395  | -0.296143 | 0.854437 | 1 RP5-1042I8.7    | -      |
| ENSG00000263934 | 0.297395  | -0.296143 | 0.854437 | 1 SNORD3A         | -      |
| ENSG00000272509 | 0.297395  | -0.296143 | 0.854437 | 1 RP11-347C18.5   | -      |
| ENSG00000116667 | -0.134206 | 4.281607  | 0.854529 | 1 C1orf21         | -      |
| ENSG00000149182 | -0.122509 | 6.090655  | 0.854564 | 1 ARFGAP2         | K12493 |
| ENSG00000198695 | 0.119944  | 9.864819  | 0.854571 | 1 MT-ND6          | K03884 |
| ENSG00000133226 | 0.121423  | 6.645042  | 0.854628 | 1 SRRM1           | K13171 |
| ENSG00000139132 | -0.135701 | 3.72796   | 0.854781 | 1 FGD4            | K05723 |
| ENSG00000101665 | 0.127831  | 4.794613  | 0.854801 | 1 SMAD7           | K19631 |
| ENSG00000136518 | -0.121194 | 6.828615  | 0.854833 | 1 ACTL6A          | K11340 |
| ENSG00000156110 | -0.121113 | 6.843195  | 0.85491  | 1 ADK             | K00856 |
| ENSG00000157450 | 0.121621  | 4.948925  | 0.854915 | 1 RNF111          | K10635 |
| ENSG00000152127 | 0.124374  | 5.172221  | 0.854946 | 1 MGAT5           | K00744 |
| ENSG00000136856 | -0.125704 | 4.56321   | 0.854948 | 1 SLC2A8          | K08145 |
| ENSG00000107651 | -0.120869 | 6.11679   | 0.854999 | 1 SEC23IP         | -      |
| ENSG00000104299 | 0.136898  | 3.182652  | 0.855112 | 1 INTS9           | K13146 |
| ENSG00000111450 | -0.123357 | 4.903519  | 0.855152 | 1 STX2            | K08486 |
| ENSG00000239306 | 0.120564  | 5.750883  | 0.855189 | 1 RBM14           | -      |
| ENSG00000039650 | -0.122329 | 5.258713  | 0.855213 | 1 PNKP            | K08073 |
| ENSG00000198841 | -0.129151 | 4.500708  | 0.855263 | 1 KTI12           | K15456 |
| ENSG00000150991 | 0.119396  | 9.351226  | 0.855323 | 1 UBC             | K08770 |
| ENSG00000105379 | 0.121319  | 6.282593  | 0.85536  | 1 ETFB            | K03521 |
| ENSG00000198208 | -0.139892 | 2.817778  | 0.855393 | 1 RPS6KL1         | K12606 |
| ENSG00000119684 | -0.128248 | 3.945504  | 0.855468 | 1 MLH3            | K08739 |
| ENSG00000171823 | -0.128248 | 3.945504  | 0.855468 | 1 FBXL14          | K10280 |
| ENSG00000099246 | 0.120452  | 6.848741  | 0.855519 | 1 RAB18           | K07910 |
| ENSG00000104369 | 0.123791  | 5.47812   | 0.855586 | 1 JPH1            | K19530 |
| ENSG00000139173 | 0.135244  | 3.342573  | 0.855599 | 1 TMEM117         | -      |
| ENSG00000143537 | -0.119513 | 8.043856  | 0.855572 | 1 ADAM15          | K06836 |
| ENSG00000107742 | 0.148185  | 2.305872  | 0.855584 | 1 SPOCK2          | K08136 |
| ENSG00000119522 | 0.123661  | 5.264152  | 0.855585 | 1 DENND1A         | -      |
| ENSG00000110955 | -0.11871  | 10.73013  | 0.855965 | 1 ATP5B           | K02133 |
| ENSG00000111790 | -0.120834 | 5.551003  | 0.856036 | 1 FGFR10P2        | -      |
| ENSG00000239305 | 0.127054  | 4.807209  | 0.856112 | 1 RNF103          | K15695 |
| ENSG00000254635 | -0.125208 | 5.012102  | 0.856214 | 1 WAC-AS1         | -      |
| ENSG00000155313 | -0.121121 | 6.234978  | 0.856315 | 1 USP25           | K11849 |
| ENSG00000147439 | 0.132805  | 3.617413  | 0.856318 | 1 BIN3            | -      |
| ENSG00000142230 | -0.119061 | 7.918118  | 0.85634  | 1 SAE1            | K10684 |
| ENSG00000087502 | 0.119942  | 6.671107  | 0.856361 | 1 ERGIC2          | -      |
| ENSG00000130244 | -0.135474 | 3.207706  | 0.856418 | 1 FAM98C          | -      |
| ENSG00000197713 | -0.120543 | 6.153583  | 0.856453 | 1 RPE             | K01783 |
| ENSG00000060749 | -0.120411 | 6.390927  | 0.856468 | 1 QSER1           | -      |
| ENSG00000114209 | -0.12028  | 6.438702  | 0.856538 | 1 PDCD10          | K18269 |
| ENSG00000104671 | 0.121308  | 5.553867  | 0.856554 | 1 DCTN6           | K10428 |
| ENSG00000263535 | 0.143323  | 2.587063  | 0.856566 | 1 AK4P1           | K00939 |
| ENSG00000119242 | 0.127921  | 2.594846  | 0.856566 | 1 CCDC92          | K16452 |
| ENSG00000196497 | 0.127921  | 2.594846  | 0.856566 | 1 IPO4            | -      |
| ENSG00000184007 | 0.118428  | 8.610036  | 0.856695 | 1 PTP4A2          | K18041 |

|                 |           |          |          |             |        |
|-----------------|-----------|----------|----------|-------------|--------|
| ENSG00000260032 | 0.118587  | 7.959978 | 0.856801 | 1 LINC00657 | -      |
| ENSG00000153936 | 0.119761  | 6.495004 | 0.856837 | 1 HS2ST1    | K02513 |
| ENSG00000164323 | -0.12031  | 6.199635 | 0.856879 | 1 KIAA1430  | -      |
| ENSG00000162402 | 0.11939   | 6.77011  | 0.856889 | 1 USP24     | K11840 |
| ENSG00000137819 | 0.12111   | 5.65225  | 0.856997 | 1 PAQR5     | -      |
| ENSG00000113971 | -0.132312 | 3.959707 | 0.857024 | 1 NPHP3     | K19360 |
| ENSG00000054793 | 0.120258  | 4.870101 | 0.857074 | 1 ATP9A     | K01530 |
| ENSG00000049618 | 0.126925  | 4.646563 | 0.857103 | 1 ARID1B    | K11653 |
| ENSG00000006744 | -0.11907  | 6.961522 | 0.8572   | 1 ELAC2     | K00784 |
| ENSG00000067560 | 0.11797   | 8.697612 | 0.857213 | 1 RHOA      | K04513 |
| ENSG00000135930 | -0.119375 | 6.322476 | 0.857259 | 1 EIF4E2    | K03259 |
| ENSG00000101442 | 0.131873  | 3.631655 | 0.857284 | 1 ACTR5     | K11672 |
| ENSG00000153066 | 0.12092   | 5.685883 | 0.857289 | 1 TXNDC11   | K09228 |
| ENSG00000024048 | -0.121942 | 5.716025 | 0.857338 | 1 UBR2      | K10626 |
| ENSG00000123353 | 0.120928  | 5.715412 | 0.857338 | 1 ORMDL2    | -      |
| ENSG00000072274 | -0.11779  | 9.017622 | 0.857369 | 1 TFRC      | K06503 |
| ENSG00000121775 | -0.126461 | 4.523742 | 0.857382 | 1 TMEM39B   | -      |
| ENSG00000160299 | 0.119974  | 6.225092 | 0.857407 | 1 PCNT      | K16481 |
| ENSG00000092531 | -0.119683 | 5.627475 | 0.857428 | 1 SNAP23    | K08508 |
| ENSG00000122550 | -0.119683 | 5.627475 | 0.857428 | 1 KLHL7     | K10445 |
| ENSG00000119328 | 0.122952  | 4.92601  | 0.857563 | 1 FAM206A   | K11373 |
| ENSG00000088247 | -0.118127 | 7.746887 | 0.857576 | 1 KHSRP     | K13210 |
| ENSG00000023909 | -0.120165 | 5.396204 | 0.857594 | 1 GCLM      | K11205 |
| ENSG00000197417 | -0.190107 | 2.005599 | 0.85762  | 1 SHPK      | K11214 |
| ENSG00000178458 | 0.152131  | 2.000963 | 0.85762  | 1 H3F3AP6   | K11253 |
| ENSG00000187764 | 0.152131  | 2.000963 | 0.85762  | 1 SEMA4D    | K06521 |
| ENSG00000167114 | -0.121939 | 5.282557 | 0.857728 | 1 SLC27A4   | K08745 |
| ENSG00000169609 | 0.129696  | 3.962373 | 0.85779  | 1 C15orf40  | K09131 |
| ENSG00000138303 | -0.122654 | 5.632783 | 0.857915 | 1 ASCC1     | K18666 |
| ENSG00000184779 | -0.125119 | 4.156832 | 0.858024 | 1 RPS17     | K02962 |
| ENSG00000164032 | -0.117357 | 8.556505 | 0.858052 | 1 H2AFZ     | K11251 |
| ENSG00000138439 | -0.132775 | 3.514331 | 0.858093 | 1 FAM117B   | -      |
| ENSG00000155657 | 0.164065  | 2.331611 | 0.858156 | 1 TTN       | K12567 |
| ENSG00000160602 | 0.145489  | 2.341    | 0.858156 | 1 NEK8      | K08857 |
| ENSG00000165521 | 0.145489  | 2.341    | 0.858156 | 1 EML5      | K18597 |
| ENSG00000136271 | -0.118028 | 7.146451 | 0.858232 | 1 DDX56     | K14810 |
| ENSG00000161671 | 0.119208  | 6.061274 | 0.858378 | 1 EMC10     | -      |
| ENSG00000224183 | -0.151555 | 2.625407 | 0.85848  | 1 SDHDP6    | K00237 |
| ENSG00000170606 | -0.116822 | 8.760184 | 0.858616 | 1 HSPA4     | K09489 |
| ENSG00000197530 | -0.124945 | 4.781331 | 0.858623 | 1 MIB2      | K10645 |
| ENSG00000136141 | -0.129731 | 4.073409 | 0.858624 | 1 LRCH1     | -      |
| ENSG00000141449 | -0.129731 | 4.073409 | 0.858624 | 1 GREB1L    | -      |
| ENSG00000164610 | -0.129808 | 4.159331 | 0.858691 | 1 RP9       | K19604 |
| ENSG00000137714 | -0.120013 | 6.042264 | 0.858721 | 1 FDX1      | K12022 |
| ENSG00000127483 | 0.117702  | 6.898128 | 0.858751 | 1 HP1BP3    | -      |
| ENSG00000106603 | -0.118499 | 6.369888 | 0.858791 | 1 COA1      | K18173 |
| ENSG00000140479 | -0.133162 | 3.226518 | 0.858962 | 1 PCSK6     | K08672 |
| ENSG00000134077 | -0.118485 | 5.373121 | 0.858993 | 1 THUMPD3   | -      |
| ENSG00000122707 | -0.120797 | 5.482068 | 0.859045 | 1 RECK      | K17461 |
| ENSG00000172775 | -0.117264 | 6.114902 | 0.859113 | 1 FAM192A   | -      |
| ENSG00000133250 | 0.123879  | 3.521497 | 0.85912  | 1 ZNF414    | -      |
| ENSG00000155380 | 0.116429  | 8.469165 | 0.859146 | 1 SLC16A1   | K08179 |
| ENSG00000244754 | -0.118991 | 6.243687 | 0.859164 | 1 N4BP2L2   | -      |
| ENSG00000102781 | -0.137604 | 3.656778 | 0.859177 | 1 KATNAL1   | K07767 |
| ENSG00000138796 | -0.12001  | 5.82055  | 0.859186 | 1 HADH      | K00022 |
| ENSG00000125449 | -0.123856 | 3.881453 | 0.859263 | 1 ARMC7     | -      |
| ENSG00000100461 | -0.120553 | 5.448333 | 0.859302 | 1 RBM23     | K13091 |
| ENSG00000166165 | 0.116028  | 9.149331 | 0.859412 | 1 CKB       | K00933 |

|                 |           |          |          |                 |        |
|-----------------|-----------|----------|----------|-----------------|--------|
| ENSG00000169660 | -0.123857 | 4.546415 | 0.859441 | 1 HEXDC         | K14459 |
| ENSG00000101138 | -0.120927 | 5.740007 | 0.859601 | 1 CSTF1         | K14406 |
| ENSG00000141378 | 0.117357  | 6.430323 | 0.859814 | 1 PTRH2         | K04794 |
| ENSG00000167543 | -0.118895 | 5.682281 | 0.859827 | 1 TP53I13       | K13707 |
| ENSG00000229927 | -0.259195 | 0.962689 | 0.859853 | 1 RHEBP1        | K07208 |
| ENSG00000231066 | -0.259195 | 0.962689 | 0.859853 | 1 NPM1P9        | K11276 |
| ENSG00000188107 | -0.213635 | 0.936686 | 0.859853 | 1 EYS           | K19601 |
| ENSG00000250539 | -0.213635 | 0.936686 | 0.859853 | 1 KRT8P33       | K07605 |
| ENSG00000157045 | 0.121667  | 4.734923 | 0.859921 | 1 NTAN1         | K14662 |
| ENSG00000183763 | -0.127709 | 4.258837 | 0.859992 | 1 TRAIIP        | K11985 |
| ENSG00000198833 | -0.117091 | 5.744924 | 0.860045 | 1 UBE2J1        | K10578 |
| ENSG00000179029 | 0.12262   | 3.887359 | 0.860058 | 1 TMEM107       | -      |
| ENSG00000111799 | -0.115892 | 7.893277 | 0.860156 | 1 COL12A1       | K08132 |
| ENSG00000129158 | -0.13891  | 3.398645 | 0.860164 | 1 SERGEF        | K15421 |
| ENSG00000197766 | 0.116681  | 6.699237 | 0.860224 | 1 CFD           | K01334 |
| ENSG00000104756 | 0.11865   | 5.097303 | 0.860225 | 1 KCTD9         | -      |
| ENSG00000043514 | 0.117775  | 5.829375 | 0.860235 | 1 TRIT1         | K00791 |
| ENSG00000168246 | 0.121295  | 4.954597 | 0.860276 | 1 UBTD2         | -      |
| ENSG00000185909 | 0.14922   | 2.864815 | 0.860291 | 1 KLHDC8B       | -      |
| ENSG00000251432 | -0.133774 | 2.866539 | 0.860291 | 1 RP11-420A23.1 | -      |
| ENSG00000146425 | 0.119068  | 5.625833 | 0.860313 | 1 DYNLT1        | K10420 |
| ENSG00000169951 | -0.134236 | 2.646039 | 0.860345 | 1 ZNF764        | K09228 |
| ENSG00000175567 | -0.116908 | 6.335025 | 0.860378 | 1 UCP2          | K15103 |
| ENSG00000250251 | -0.172282 | 2.370076 | 0.8604   | 1 PKD1P6        | K04985 |
| ENSG00000109519 | -0.117547 | 6.23557  | 0.860425 | 1 GRPEL1        | K03687 |
| ENSG00000143294 | 0.116757  | 6.496452 | 0.860427 | 1 PRCC          | K13105 |
| ENSG00000116688 | 0.116498  | 6.702611 | 0.860437 | 1 MFN2          | K06030 |
| ENSG00000111012 | -0.162343 | 2.03682  | 0.86044  | 1 CYP27B1       | K07438 |
| ENSG00000179115 | -0.115966 | 7.377001 | 0.86047  | 1 FARSA         | K01889 |
| ENSG00000116350 | -0.118094 | 6.107291 | 0.860491 | 1 SRSF4         | K12893 |
| ENSG00000132199 | 0.117644  | 5.914043 | 0.860601 | 1 ENOSF1        | K18334 |
| ENSG00000167747 | -0.115853 | 7.254897 | 0.860724 | 1 C19orf48      | -      |
| ENSG00000229117 | -0.115294 | 8.094791 | 0.860751 | 1 RPL41         | K02928 |
| ENSG00000095066 | 0.120797  | 5.31354  | 0.860752 | 1 HOOK2         | K16611 |
| ENSG00000128011 | -0.122463 | 4.74582  | 0.860803 | 1 LRFN1         | K16354 |
| ENSG00000133316 | -0.117321 | 5.599724 | 0.860814 | 1 WDR74         | K14841 |
| ENSG00000138073 | 0.117286  | 5.780718 | 0.860901 | 1 PREB          | K14003 |
| ENSG00000156384 | 0.128574  | 3.789146 | 0.860926 | 1 SFR1          | K17985 |
| ENSG00000085721 | -0.119253 | 5.725171 | 0.860949 | 1 RRN3          | K15216 |
| ENSG00000105669 | 0.115844  | 6.91894  | 0.860951 | 1 COPE          | K17268 |
| ENSG00000029725 | -0.115985 | 6.903771 | 0.860966 | 1 RABEP1        | K12480 |
| ENSG00000137040 | -0.116879 | 5.944591 | 0.860969 | 1 RANBP6        | -      |
| ENSG00000100697 | -0.12234  | 4.963751 | 0.861033 | 1 DICER1        | K11592 |
| ENSG00000188010 | -0.129137 | 3.544645 | 0.86113  | 1 MORN2         | -      |
| ENSG00000166199 | 0.121271  | 4.270481 | 0.861212 | 1 ALKBH3        | K10860 |
| ENSG00000178467 | 0.121271  | 4.270481 | 0.861212 | 1 P4HTM         | K06711 |
| ENSG00000112335 | 0.11536   | 7.211079 | 0.861225 | 1 SNX3          | K17918 |
| ENSG00000100483 | -0.128948 | 3.410882 | 0.861261 | 1 VCPKMT        | -      |
| ENSG00000107295 | 0.11798   | 5.062275 | 0.861301 | 1 SH3GL2        | K11247 |
| ENSG00000172057 | 0.12065   | 4.965875 | 0.861408 | 1 ORMDL3        | -      |
| ENSG00000158863 | 0.124697  | 4.563652 | 0.861442 | 1 FAM160B2      | -      |
| ENSG00000070047 | 0.118279  | 5.434142 | 0.861493 | 1 PHRF1         | K17586 |
| ENSG00000160613 | 0.116187  | 5.435157 | 0.861493 | 1 PCSK7         | K08673 |
| ENSG00000164609 | 0.116421  | 6.247203 | 0.861517 | 1 SLU7          | K12819 |
| ENSG00000164877 | -0.121695 | 5.157958 | 0.861535 | 1 MICALL2       | -      |
| ENSG00000106591 | -0.116161 | 6.361923 | 0.8616   | 1 MRPL32        | K02911 |
| ENSG00000101199 | 0.115029  | 7.228445 | 0.861604 | 1 ARFGAP1       | K12492 |
| ENSG00000196196 | -0.140865 | 3.084006 | 0.86161  | 1 HRCT1         | -      |

|                 |           |          |          |                 |        |
|-----------------|-----------|----------|----------|-----------------|--------|
| ENSG0000066248  | -0.126778 | 3.908014 | 0.861621 | 1 NGEF          | K07525 |
| ENSG00000123131 | 0.114387  | 8.402507 | 0.861624 | 1 PRDX4         | K03386 |
| ENSG00000151923 | -0.115381 | 6.943132 | 0.86164  | 1 TIAL1         | K13201 |
| ENSG00000104881 | 0.116937  | 5.844726 | 0.861677 | 1 PPP1R13L      | K17985 |
| ENSG00000125944 | -0.114469 | 8.178574 | 0.861695 | 1 HNRNPR        | K13161 |
| ENSG00000105438 | 0.114479  | 7.944007 | 0.861739 | 1 KDELR1        | K10949 |
| ENSG00000262758 | -0.126459 | 3.805136 | 0.861762 | 1 CTD-3195I5.1  | -      |
| ENSG00000048991 | 0.117973  | 5.402333 | 0.861815 | 1 R3HDM1        | K05054 |
| ENSG00000184232 | 0.116386  | 5.674755 | 0.861923 | 1 OAF           | -      |
| ENSG00000140259 | 0.115349  | 6.558284 | 0.862017 | 1 MFAP1         | K13110 |
| ENSG00000171241 | -0.116443 | 6.122474 | 0.86202  | 1 SHCBP1        | -      |
| ENSG00000231991 | 0.115148  | 6.680103 | 0.862084 | 1 ANXA2P2       | K17092 |
| ENSG00000166974 | -0.147761 | 2.653451 | 0.862161 | 1 MAPRE2        | K10436 |
| ENSG00000152556 | -0.114446 | 7.509201 | 0.862175 | 1 PFKM          | K00850 |
| ENSG00000196839 | 0.114325  | 6.078898 | 0.862266 | 1 ADA           | K01488 |
| ENSG00000122873 | -0.115061 | 6.715156 | 0.862332 | 1 CISD1         | -      |
| ENSG00000215301 | -0.113563 | 8.936772 | 0.862471 | 1 DDX3X         | K11594 |
| ENSG00000184381 | 0.122265  | 3.262827 | 0.862614 | 1 PLA2G6        | K16343 |
| ENSG00000184445 | 0.11467   | 6.639747 | 0.862712 | 1 KNTC1         | -      |
| ENSG00000110721 | -0.120379 | 4.876904 | 0.862724 | 1 CHKA          | K14156 |
| ENSG00000121152 | -0.1154   | 6.108568 | 0.862735 | 1 NCAPH         | K06676 |
| ENSG00000143977 | -0.117209 | 4.984655 | 0.862889 | 1 SNRPG         | K11099 |
| ENSG00000169884 | -0.11939  | 4.022957 | 0.86293  | 1 WNT10B        | K01357 |
| ENSG00000129351 | 0.113084  | 8.722416 | 0.863072 | 1 ILF3          | K13090 |
| ENSG00000121073 | -0.117103 | 5.861086 | 0.86309  | 1 SLC35B1       | K15275 |
| ENSG00000107077 | 0.125103  | 4.205344 | 0.863189 | 1 KDM4C         | K06709 |
| ENSG00000117682 | 0.119813  | 4.373572 | 0.863392 | 1 DHDDS         | K11778 |
| ENSG00000124380 | -0.115722 | 5.52839  | 0.863446 | 1 SNRNP27       | K12846 |
| ENSG00000090372 | -0.1143   | 6.556564 | 0.863486 | 1 STRN4         | K17608 |
| ENSG00000138760 | 0.113141  | 7.625698 | 0.863546 | 1 SCARB2        | K12384 |
| ENSG00000127540 | -0.113597 | 7.093535 | 0.863599 | 1 UQCR11        | K00420 |
| ENSG00000148737 | -0.118079 | 3.70436  | 0.863697 | 1 TCF7L2        | K04491 |
| ENSG00000107140 | -0.118839 | 4.943941 | 0.863752 | 1 TESK1         | K08841 |
| ENSG00000124203 | 0.115584  | 5.812295 | 0.863838 | 1 ZNF831        | -      |
| ENSG00000140859 | -0.124103 | 3.931158 | 0.863902 | 1 KIFC3         | K10406 |
| ENSG00000159214 | 0.137214  | 2.672259 | 0.86393  | 1 CCDC24        | K05038 |
| ENSG00000197385 | 0.137214  | 2.672259 | 0.86393  | 1 ZNF860        | -      |
| ENSG00000103202 | 0.113304  | 6.939809 | 0.86397  | 1 NME4          | K00940 |
| ENSG00000106077 | -0.201436 | 1.633698 | 0.863995 | 1 ABHD11        | K13703 |
| ENSG00000165181 | -0.173513 | 1.617951 | 0.863995 | 1 C9orf84       | -      |
| ENSG00000186162 | 0.158618  | 1.614023 | 0.863995 | 1 CIDECP        | -      |
| ENSG00000215154 | 0.158618  | 1.614023 | 0.863995 | 1 AC141586.5    | -      |
| ENSG00000117859 | 0.11306   | 7.114312 | 0.864076 | 1 OSBPL9        | -      |
| ENSG00000189091 | -0.112568 | 7.640223 | 0.864323 | 1 SF3B3         | K12830 |
| ENSG00000180817 | 0.111955  | 8.469386 | 0.86452  | 1 PPA1          | K01507 |
| ENSG00000100116 | -0.115728 | 5.144379 | 0.86457  | 1 GCAT          | K00639 |
| ENSG00000168374 | -0.112236 | 7.839006 | 0.864579 | 1 ARF4          | K07939 |
| ENSG00000087111 | 0.113405  | 6.367395 | 0.864645 | 1 PIGS          | K05291 |
| ENSG00000240087 | 0.140478  | 2.408782 | 0.864681 | 1 RP11-254B13.1 | K02998 |
| ENSG00000175073 | 0.113997  | 5.982258 | 0.864698 | 1 VCP1P1        | K11861 |
| ENSG00000140181 | -0.115645 | 5.190722 | 0.864742 | 1 HERC2P2       | K10595 |
| ENSG00000183735 | 0.116149  | 5.358087 | 0.864778 | 1 TBK1          | K05410 |
| ENSG00000109775 | -0.121536 | 4.463393 | 0.864782 | 1 UFSP2         | -      |
| ENSG00000133142 | -0.11295  | 6.76599  | 0.864787 | 1 TCEAL4        | -      |
| ENSG00000198554 | -0.114711 | 5.70515  | 0.86484  | 1 WDHD1         | K11274 |
| ENSG00000103423 | -0.112715 | 6.835573 | 0.864973 | 1 DNAJA3        | K09504 |
| ENSG00000173041 | -0.122053 | 4.226371 | 0.86503  | 1 ZNF680        | K09228 |
| ENSG00000163162 | -0.113019 | 6.54206  | 0.865044 | 1 RNF149        | K15704 |

|                 |           |           |          |                 |        |
|-----------------|-----------|-----------|----------|-----------------|--------|
| ENSG00000165156 | -0.112989 | 6.200846  | 0.865139 | 1 ZHX1          | -      |
| ENSG00000169692 | 0.112457  | 6.795191  | 0.865158 | 1 AGPAT2        | K13509 |
| ENSG00000164465 | 0.114066  | 5.475164  | 0.865186 | 1 DCBLD1        | -      |
| ENSG00000137817 | -0.116933 | 4.73596   | 0.865261 | 1 PARP6         | K15258 |
| ENSG00000047579 | -0.113787 | 4.734301  | 0.865261 | 1 DTNBP1        | -      |
| ENSG00000272750 | -0.19709  | 1.024885  | 0.865284 | 1 RP11-378J18.8 | -      |
| ENSG00000106976 | 0.179911  | 0.998629  | 0.865284 | 1 DNMI          | K01528 |
| ENSG00000206145 | 0.179911  | 0.998629  | 0.865284 | 1 P2RX6P        | K05221 |
| ENSG00000170266 | 0.112297  | 6.015192  | 0.865326 | 1 GLB1          | K12309 |
| ENSG00000166860 | -0.121522 | 4.144458  | 0.865347 | 1 ZBTB39        | K10511 |
| ENSG00000125676 | 0.112038  | 7.032209  | 0.865387 | 1 THOC2         | K12879 |
| ENSG00000157764 | -0.116682 | 4.542616  | 0.86553  | 1 BRAF          | K04365 |
| ENSG00000196387 | -0.135741 | 3.124679  | 0.865556 | 1 ZNF140        | K09228 |
| ENSG00000101197 | 0.149665  | 2.692365  | 0.865655 | 1 BIRC7         | K16061 |
| ENSG00000181638 | 0.149665  | 2.692365  | 0.865655 | 1 ZFP41         | -      |
| ENSG00000167733 | -0.176418 | 2.08996   | 0.865756 | 1 HSD11B1L      | -      |
| ENSG00000169627 | -0.176418 | 2.08996   | 0.865756 | 1 BOLA2B        | -      |
| ENSG00000178401 | -0.176418 | 2.08996   | 0.865756 | 1 DNAJC22       | K19370 |
| ENSG00000166435 | 0.167739  | 2.074916  | 0.865756 | 1 XRR1A1        | -      |
| ENSG00000262879 | -0.156287 | 2.078738  | 0.865756 | 1 RP11-156P1.3  | -      |
| ENSG00000167447 | -0.114488 | 5.33018   | 0.865767 | 1 SMG8          | K18734 |
| ENSG00000155275 | 0.119554  | 3.596014  | 0.865915 | 1 TRMT44        | K15447 |
| ENSG00000092853 | -0.119626 | 4.680642  | 0.865934 | 1 CLSPN         | -      |
| ENSG00000119771 | 0.12452   | 3.953964  | 0.866109 | 1 KLHL29        | K10465 |
| ENSG00000144824 | -0.110917 | 7.768797  | 0.866211 | 1 PHLDB2        | -      |
| ENSG00000085514 | 0.381678  | -0.15322  | 0.866239 | 1 PILRA         | K15411 |
| ENSG00000142619 | 0.381678  | -0.15322  | 0.866239 | 1 PADI3         | K01481 |
| ENSG00000172404 | 0.381678  | -0.15322  | 0.866239 | 1 DNAJB7        | K09513 |
| ENSG00000230439 | 0.381678  | -0.15322  | 0.866239 | 1 RP11-488P3.1  | -      |
| ENSG00000234424 | 0.381678  | -0.15322  | 0.866239 | 1 RP11-213G2.1  | K10395 |
| ENSG00000247679 | 0.381678  | -0.15322  | 0.866239 | 1 RP11-1277A3.1 | -      |
| ENSG00000264919 | 0.381678  | -0.15322  | 0.866239 | 1 MIR4697       | -      |
| ENSG00000272078 | 0.381678  | -0.15322  | 0.866239 | 1 RP4-734G22.3  | -      |
| ENSG00000272744 | 0.381678  | -0.15322  | 0.866239 | 1 RP11-367N14.3 | -      |
| ENSG00000102174 | 0.257959  | -0.094796 | 0.866239 | 1 PHEX          | K08636 |
| ENSG00000120784 | 0.257959  | -0.094796 | 0.866239 | 1 ZFP30         | K09228 |
| ENSG00000135740 | 0.257959  | -0.094796 | 0.866239 | 1 SLC9A5        | K14723 |
| ENSG00000138080 | 0.257959  | -0.094796 | 0.866239 | 1 EMILIN1       | -      |
| ENSG00000163959 | 0.257959  | -0.094796 | 0.866239 | 1 SLC51A        | K17985 |
| ENSG00000164651 | 0.257959  | -0.094796 | 0.866239 | 1 SP8           | K09198 |
| ENSG00000164845 | 0.257959  | -0.094796 | 0.866239 | 1 FAM86FP       | K12354 |
| ENSG00000177788 | 0.257959  | -0.094796 | 0.866239 | 1 RP5-1061H20.4 | -      |
| ENSG00000178104 | 0.257959  | -0.094796 | 0.866239 | 1 PDE4DIP       | K16549 |
| ENSG00000196747 | 0.257959  | -0.094796 | 0.866239 | 1 HIST1H2AI     | K11251 |
| ENSG00000198785 | 0.257959  | -0.094796 | 0.866239 | 1 GRIN3A        | K05213 |
| ENSG00000213621 | 0.257959  | -0.094796 | 0.866239 | 1 RPSAP54       | K02998 |
| ENSG00000253854 | 0.257959  | -0.094796 | 0.866239 | 1 RP11-10N23.2  | -      |
| ENSG00000272046 | 0.257959  | -0.094796 | 0.866239 | 1 RP11-471M2.3  | -      |
| ENSG00000272288 | 0.257959  | -0.094796 | 0.866239 | 1 RP11-140K17.3 | -      |
| ENSG00000272702 | 0.257959  | -0.094796 | 0.866239 | 1 RP11-44N22.3  | -      |
| ENSG00000146757 | 0.125832  | 3.727591  | 0.866273 | 1 ZNF92         | K09228 |
| ENSG00000176692 | -0.121499 | 3.734364  | 0.866273 | 1 FOXC2         | K09396 |
| ENSG00000104613 | 0.11139   | 6.861968  | 0.866355 | 1 INTS10        | K13147 |
| ENSG00000168538 | 0.11524   | 5.375103  | 0.866433 | 1 TRAPPC11      | -      |
| ENSG00000064419 | -0.113533 | 6.05288   | 0.866441 | 1 TNPO3         | K15436 |
| ENSG00000139613 | 0.111768  | 6.05203   | 0.866441 | 1 SMARCC2       | K11649 |
| ENSG00000108671 | -0.111326 | 6.892028  | 0.866563 | 1 PSMD11        | K03036 |
| ENSG00000081320 | -0.115273 | 4.408676  | 0.866643 | 1 STK17B        | K08804 |

|                 |           |          |          |                 |        |
|-----------------|-----------|----------|----------|-----------------|--------|
| ENSG00000131508 | -0.110885 | 7.178911 | 0.866759 | 1 UBE2D2        | K06689 |
| ENSG00000165244 | 0.111104  | 5.900139 | 0.866785 | 1 ZNF367        | K09228 |
| ENSG00000225630 | 0.111076  | 5.928513 | 0.866846 | 1 MTND2P28      | K03879 |
| ENSG00000164975 | -0.113528 | 5.457339 | 0.866879 | 1 SNAPC3        | K15210 |
| ENSG00000005810 | -0.115352 | 5.215708 | 0.8669   | 1 MYCBP2        | K10693 |
| ENSG00000003096 | 0.11754   | 4.749695 | 0.866949 | 1 KLHL13        | K10447 |
| ENSG00000170759 | -0.110049 | 8.189    | 0.866999 | 1 KIF5B         | K10396 |
| ENSG00000166477 | 0.112037  | 6.264988 | 0.867073 | 1 LEO1          | K15177 |
| ENSG00000062194 | -0.110933 | 6.837881 | 0.867105 | 1 GPBP1         | -      |
| ENSG00000175793 | -0.110372 | 7.395109 | 0.867163 | 1 SFN           | K06644 |
| ENSG00000112640 | 0.110863  | 6.697103 | 0.867195 | 1 PPP2R5D       | K11584 |
| ENSG00000224546 | 0.119169  | 3.31671  | 0.8672   | 1 EIF4BP3       | K03258 |
| ENSG00000070950 | -0.117494 | 5.081044 | 0.867246 | 1 RAD18         | K10627 |
| ENSG00000087274 | 0.111004  | 5.986411 | 0.867318 | 1 ADD1          | -      |
| ENSG00000076003 | 0.110262  | 7.218146 | 0.867333 | 1 MCM6          | K02542 |
| ENSG00000142507 | -0.11052  | 7.002472 | 0.867394 | 1 PSMB6         | K02738 |
| ENSG00000173914 | -0.118944 | 4.254178 | 0.86741  | 1 RBM4B         | K13187 |
| ENSG00000187650 | 0.184105  | 1.654901 | 0.867417 | 1 VMAC          | K17985 |
| ENSG00000223478 | 0.184105  | 1.654901 | 0.867417 | 1 RP11-545E17.3 | -      |
| ENSG00000197587 | -0.164932 | 1.673673 | 0.867417 | 1 DMBX1         | K11447 |
| ENSG00000231711 | -0.164932 | 1.673673 | 0.867417 | 1 LINC00899     | -      |
| ENSG00000131791 | 0.153839  | 1.670369 | 0.867417 | 1 PRKAB2        | K07199 |
| ENSG00000215447 | 0.153839  | 1.670369 | 0.867417 | 1 BX322557.10   | -      |
| ENSG00000054118 | 0.110371  | 6.983795 | 0.867439 | 1 THRAP3        | K13112 |
| ENSG00000100412 | 0.11093   | 6.395284 | 0.867561 | 1 ACO2          | K01681 |
| ENSG00000118579 | -0.114423 | 5.133179 | 0.867658 | 1 MED28         | K15141 |
| ENSG00000144645 | 0.113024  | 5.70619  | 0.867798 | 1 OSBPL10       | -      |
| ENSG00000169021 | -0.10978  | 7.46971  | 0.867809 | 1 UQCRFS1       | K00411 |
| ENSG00000234518 | -0.12628  | 3.750807 | 0.867937 | 1 PTGES3P1      | K15730 |
| ENSG00000100897 | -0.113866 | 5.184706 | 0.868041 | 1 DCAF11        | K11801 |
| ENSG00000132405 | 0.117778  | 3.866515 | 0.868104 | 1 TBC1D14       | -      |
| ENSG00000197535 | -0.116608 | 4.99018  | 0.868105 | 1 MYO5A         | K10357 |
| ENSG00000175215 | 0.109579  | 7.183546 | 0.868186 | 1 CTDSP2        | K15731 |
| ENSG00000101546 | -0.117414 | 4.427147 | 0.868211 | 1 RBFA          | -      |
| ENSG00000197150 | -0.111701 | 5.314842 | 0.868214 | 1 ABCB8         | K05655 |
| ENSG00000010244 | -0.109427 | 7.347731 | 0.868342 | 1 ZNF207        | -      |
| ENSG00000106771 | 0.109442  | 7.097413 | 0.868435 | 1 TMEM245       | -      |
| ENSG00000099956 | -0.110222 | 6.485957 | 0.868488 | 1 SMARCB1       | K11648 |
| ENSG00000174652 | 0.113946  | 5.359157 | 0.868537 | 1 ZNF266        | K09228 |
| ENSG00000188735 | -0.116502 | 4.770095 | 0.868596 | 1 TMEM120B      | -      |
| ENSG00000174996 | -0.111479 | 5.514073 | 0.868687 | 1 KLC2          | K10407 |
| ENSG00000152217 | -0.142464 | 2.459514 | 0.868708 | 1 SETBP1        | -      |
| ENSG00000170242 | 0.109219  | 6.978929 | 0.868826 | 1 USP47         | K11857 |
| ENSG00000130717 | 0.113385  | 5.049092 | 0.868846 | 1 UCK1          | K00876 |
| ENSG00000060971 | -0.112693 | 4.57973  | 0.868852 | 1 ACAA1         | K07513 |
| ENSG00000180879 | -0.123068 | 3.990269 | 0.868943 | 1 SSR4          | K04571 |
| ENSG00000188177 | -0.137236 | 2.73447  | 0.868977 | 1 ZC3H6         | K12581 |
| ENSG00000169752 | 0.133523  | 2.726376 | 0.868977 | 1 NRG4          | K05458 |
| ENSG00000183741 | -0.109978 | 6.369913 | 0.868984 | 1 CBX6          | K11453 |
| ENSG00000156928 | -0.109774 | 6.471212 | 0.869049 | 1 MALSU1        | -      |
| ENSG00000103507 | -0.111643 | 5.980449 | 0.869054 | 1 BCKDK         | K00905 |
| ENSG00000128059 | -0.111349 | 5.721029 | 0.869074 | 1 PPAT          | K00764 |
| ENSG00000124198 | -0.11172  | 6.057498 | 0.869105 | 1 ARFGEF2       | K18442 |
| ENSG00000182986 | -0.116937 | 4.272423 | 0.869141 | 1 ZNF320        | K09228 |
| ENSG00000082996 | -0.109499 | 5.754707 | 0.8693   | 1 RNF13         | K15692 |
| ENSG00000203485 | -0.108661 | 7.26323  | 0.869343 | 1 INF2          | -      |
| ENSG00000181588 | -0.112429 | 5.369941 | 0.869346 | 1 MEX3D         | K15686 |
| ENSG00000198740 | 0.115874  | 4.895399 | 0.869453 | 1 ZNF652        | -      |



|                 |           |          |          |                 |        |
|-----------------|-----------|----------|----------|-----------------|--------|
| ENSG00000116459 | -0.107985 | 8.232217 | 0.869458 | 1 ATP5F1        | K02127 |
| ENSG00000102910 | -0.114617 | 5.20029  | 0.869561 | 1 LONP2         | K01338 |
| ENSG00000172725 | -0.10929  | 6.485471 | 0.869605 | 1 CORO1B        | K13886 |
| ENSG00000135441 | -0.115651 | 4.443345 | 0.869744 | 1 BLOC1S1       | -      |
| ENSG00000196465 | -0.109765 | 6.113654 | 0.869777 | 1 MYL6B         | K12751 |
| ENSG00000092330 | 0.112486  | 4.720057 | 0.869795 | 1 TINF2         | K11112 |
| ENSG00000141030 | -0.1082   | 7.23383  | 0.869926 | 1 COPS3         | K12177 |
| ENSG00000007968 | 0.110313  | 5.160023 | 0.870164 | 1 E2F2          | K09389 |
| ENSG00000175203 | 0.107976  | 7.032862 | 0.87026  | 1 DCTN2         | K10424 |
| ENSG00000160161 | 0.218309  | 1.060075 | 0.870304 | 1 CILP2         | -      |
| ENSG00000176714 | 0.218309  | 1.060075 | 0.870304 | 1 CCDC121       | K06883 |
| ENSG00000260686 | 0.218309  | 1.060075 | 0.870304 | 1 CTB-36H16.2   | -      |
| ENSG00000270102 | 0.218309  | 1.060075 | 0.870304 | 1 RP11-498E2.8  | -      |
| ENSG00000119547 | -0.122507 | 3.893287 | 0.870335 | 1 ONECUT2       | -      |
| ENSG00000204237 | -0.109749 | 5.637201 | 0.870347 | 1 OXLD1         | -      |
| ENSG00000106266 | 0.109504  | 5.602537 | 0.870354 | 1 SNX8          | K17922 |
| ENSG00000173681 | -0.126809 | 3.356228 | 0.870444 | 1 CXorf23       | K17985 |
| ENSG00000078319 | -0.128582 | 3.183627 | 0.870482 | 1 PMS2P1        | K10858 |
| ENSG00000177943 | -0.130882 | 2.987527 | 0.870527 | 1 MAMDC4        | -      |
| ENSG00000245556 | -0.120169 | 2.981718 | 0.870527 | 1 CTD-2037K23.2 | -      |
| ENSG00000113712 | 0.107811  | 6.96459  | 0.870532 | 1 CSNK1A1       | K08957 |
| ENSG00000172465 | 0.112206  | 4.850492 | 0.870576 | 1 TCEAL1        | -      |
| ENSG00000250067 | -0.133987 | 2.760502 | 0.870578 | 1 YJEFN3        | K11353 |
| ENSG00000117543 | -0.108595 | 6.393572 | 0.870597 | 1 DPH5          | K00586 |
| ENSG00000135605 | -0.138409 | 2.490936 | 0.870633 | 1 TEC           | K07364 |
| ENSG00000154146 | -0.138409 | 2.490936 | 0.870633 | 1 NRG1          | -      |
| ENSG00000228638 | -0.138409 | 2.490936 | 0.870633 | 1 FCF1P2        | K14566 |
| ENSG00000148341 | 0.108153  | 6.552661 | 0.870645 | 1 SH3GLB2       | K11248 |
| ENSG00000100320 | -0.108131 | 6.700928 | 0.870657 | 1 RBFOX2        | K14946 |
| ENSG00000185808 | 0.111704  | 4.598552 | 0.870679 | 1 PIGP          | K03861 |
| ENSG00000176387 | -0.14521  | 2.159113 | 0.870682 | 1 HSD11B2       | -      |
| ENSG00000214300 | 0.142368  | 2.12708  | 0.870682 | 1 SPDYE3        | K08694 |
| ENSG00000145088 | -0.125888 | 2.148444 | 0.870682 | 1 EAF2          | K15186 |
| ENSG00000048649 | 0.109549  | 6.14796  | 0.870717 | 1 RSF1          | K11657 |
| ENSG00000147224 | 0.107118  | 7.703722 | 0.870727 | 1 PRPS1         | K00948 |
| ENSG00000100528 | -0.108146 | 6.570949 | 0.870836 | 1 CNIH1         | -      |
| ENSG00000260359 | 0.11577   | 4.200662 | 0.870876 | 1 RP11-4F5.2    | -      |
| ENSG00000099624 | -0.10709  | 7.629002 | 0.870912 | 1 ATP5D         | K02134 |
| ENSG00000163527 | 0.106742  | 8.072099 | 0.870966 | 1 STT3B         | K07151 |
| ENSG00000171858 | 0.106573  | 8.435789 | 0.871004 | 1 RPS21         | K02971 |
| ENSG00000142856 | -0.108241 | 6.386779 | 0.871033 | 1 ITGB3BP       | K11510 |
| ENSG00000198382 | 0.109828  | 5.169808 | 0.87108  | 1 UVRAG         | -      |
| ENSG00000131171 | 0.116092  | 3.782952 | 0.871144 | 1 SH3BGR1       | -      |
| ENSG00000103994 | -0.107957 | 6.45981  | 0.871246 | 1 ZNF106        | -      |
| ENSG00000106524 | 0.108879  | 5.577946 | 0.871283 | 1 ANKMY2        | -      |
| ENSG00000119333 | -0.107068 | 7.198459 | 0.871321 | 1 WDR34         | -      |
| ENSG00000118640 | -0.108916 | 5.952413 | 0.871354 | 1 VAMP8         | K08512 |
| ENSG00000213445 | 0.108481  | 5.952089 | 0.871354 | 1 SIPA1         | K08013 |
| ENSG00000076513 | 0.11209   | 5.173457 | 0.871382 | 1 ANKRD13A      | -      |
| ENSG00000156482 | 0.105932  | 10.04848 | 0.871391 | 1 RPL30         | K02908 |
| ENSG00000122376 | -0.107587 | 6.032947 | 0.87145  | 1 FAM35A        | -      |
| ENSG00000136717 | 0.107003  | 6.996207 | 0.871468 | 1 BIN1          | K12562 |
| ENSG00000046604 | -0.10678  | 7.37889  | 0.871493 | 1 DSG2          | K07597 |
| ENSG00000175970 | -0.110055 | 5.309324 | 0.871539 | 1 UNC119B       | -      |
| ENSG00000065559 | -0.110046 | 5.509269 | 0.871586 | 1 MAP2K4        | K04430 |
| ENSG00000154945 | 0.107908  | 5.395056 | 0.871714 | 1 ANKRD40       | K09488 |
| ENSG00000111237 | -0.106805 | 7.012029 | 0.871842 | 1 VPS29         | K18467 |
| ENSG00000110060 | -0.114394 | 3.798691 | 0.871922 | 1 PUS3          | K01855 |

|                 |           |          |          |                |        |
|-----------------|-----------|----------|----------|----------------|--------|
| ENSG00000134759 | 0.107246  | 6.384809 | 0.871993 | 1 ELP2         | K11374 |
| ENSG00000135390 | -0.105909 | 8.059788 | 0.872048 | 1 ATP5G2       | K02128 |
| ENSG00000146676 | 0.106996  | 6.322028 | 0.872158 | 1 PURB         | K11251 |
| ENSG00000135269 | 0.106344  | 7.067288 | 0.872184 | 1 TES          | -      |
| ENSG00000171456 | 0.106695  | 6.677502 | 0.87222  | 1 ASXL1        | K11471 |
| ENSG00000198920 | 0.111405  | 4.981263 | 0.872267 | 1 KIAA0753     | -      |
| ENSG00000138326 | 0.105115  | 10.83653 | 0.872296 | 1 RPS24        | K02974 |
| ENSG00000197885 | 0.114544  | 4.392534 | 0.872339 | 1 NKIRAS1      | K17197 |
| ENSG00000135932 | -0.108033 | 6.259822 | 0.872397 | 1 CAB39        | K08272 |
| ENSG00000070214 | 0.106421  | 6.788832 | 0.872406 | 1 SLC44A1      | -      |
| ENSG00000047410 | -0.105619 | 7.960865 | 0.872454 | 1 TPR          | K09291 |
| ENSG00000154767 | -0.111123 | 5.233288 | 0.872499 | 1 XPC          | K10838 |
| ENSG00000105717 | 0.133785  | 2.50482  | 0.872503 | 1 PBX4         | K15611 |
| ENSG00000114737 | 0.133785  | 2.50482  | 0.872503 | 1 CISH         | K04701 |
| ENSG00000198252 | -0.115867 | 4.550116 | 0.872573 | 1 STYX         | K18042 |
| ENSG00000135052 | -0.105625 | 7.599027 | 0.872696 | 1 GOLM1        | -      |
| ENSG00000164078 | -0.108557 | 5.280289 | 0.872704 | 1 MST1R        | K05100 |
| ENSG00000164626 | 0.12561   | 3.206849 | 0.872812 | 1 KCNK5        | K04916 |
| ENSG00000162521 | 0.105658  | 7.253349 | 0.87283  | 1 RBBP4        | K10752 |
| ENSG00000178074 | -0.111573 | 4.62484  | 0.872891 | 1 C2orf69      | -      |
| ENSG00000139645 | -0.105965 | 6.972439 | 0.872897 | 1 ANKRD52      | K15504 |
| ENSG00000110048 | 0.106145  | 6.595027 | 0.872994 | 1 OSBP         | -      |
| ENSG00000100348 | -0.106225 | 6.310965 | 0.873011 | 1 TXN2         | K03671 |
| ENSG00000132773 | 0.111167  | 5.238826 | 0.873071 | 1 TOE1         | K13202 |
| ENSG00000133639 | -0.106304 | 6.552394 | 0.873075 | 1 BTG1         | K14443 |
| ENSG00000110090 | 0.108735  | 5.886849 | 0.873093 | 1 CPT1A        | K08765 |
| ENSG00000130303 | -0.104734 | 8.795606 | 0.873137 | 1 BST2         | K06731 |
| ENSG00000099992 | 0.114591  | 3.925489 | 0.873196 | 1 TBC1D10A     | -      |
| ENSG00000135506 | 0.10518   | 7.439016 | 0.873249 | 1 OS9          | K10088 |
| ENSG00000165782 | 0.110592  | 4.821308 | 0.873302 | 1 TMEM55B      | K13084 |
| ENSG00000163807 | -0.110466 | 4.826778 | 0.873302 | 1 KIAA1143     | K17985 |
| ENSG00000160223 | -0.10716  | 4.56125  | 0.873485 | 1 ICOSLG       | K06710 |
| ENSG00000161904 | -0.106542 | 6.082305 | 0.873522 | 1 LEMD2        | -      |
| ENSG00000184602 | 0.115381  | 3.385554 | 0.873533 | 1 SNN          | -      |
| ENSG0000018510  | 0.105878  | 6.413914 | 0.873586 | 1 AGPS         | K00803 |
| ENSG00000168496 | 0.104395  | 8.317113 | 0.873675 | 1 FEN1         | K04799 |
| ENSG00000104365 | -0.109853 | 5.104152 | 0.87369  | 1 IKBKB        | K07209 |
| ENSG00000136758 | -0.104636 | 7.818804 | 0.873727 | 1 YME1L1       | K08955 |
| ENSG00000135720 | -0.107459 | 5.92454  | 0.873745 | 1 DYNC1LI2     | K10416 |
| ENSG00000100058 | 0.109911  | 4.634335 | 0.873755 | 1 CRYBB2P1     | K00543 |
| ENSG00000166024 | 0.118587  | 4.235993 | 0.873756 | 1 R3HCC1L      | -      |
| ENSG00000006652 | 0.104868  | 7.270498 | 0.873765 | 1 IFRD1        | -      |
| ENSG00000133433 | -0.182934 | 1.741872 | 0.873769 | 1 GSTT2B       | K00799 |
| ENSG00000227008 | -0.182934 | 1.741872 | 0.873769 | 1 RP3-417G15.1 | K02974 |
| ENSG00000167815 | 0.104441  | 7.991278 | 0.873776 | 1 PRDX2        | K03386 |
| ENSG00000108312 | -0.104866 | 7.355535 | 0.873814 | 1 UBTF         | K09273 |
| ENSG00000151694 | 0.106851  | 4.767568 | 0.873833 | 1 ADAM17       | K06059 |
| ENSG00000125691 | 0.103907  | 9.490747 | 0.873918 | 1 RPL23        | K02894 |
| ENSG00000102858 | -0.106895 | 5.107964 | 0.874    | 1 MGRN1        | K10604 |
| ENSG00000134297 | 0.122094  | 3.551768 | 0.874102 | 1 PLEKHA8P1    | -      |
| ENSG00000218739 | -0.105326 | 6.60783  | 0.87416  | 1 CEBPZ-AS1    | K14832 |
| ENSG00000067365 | -0.111726 | 3.823642 | 0.8742   | 1 METTL22      | -      |
| ENSG00000100109 | 0.110093  | 4.892467 | 0.874256 | 1 TFIP11       | K13103 |
| ENSG00000147996 | -0.149303 | 2.529808 | 0.874319 | 1 CBWD5        | -      |
| ENSG00000114391 | -0.103636 | 9.168002 | 0.874348 | 1 RPL24        | K02896 |
| ENSG00000163597 | 0.108777  | 5.54167  | 0.874392 | 1 SNHG16       | -      |
| ENSG00000166710 | 0.103328  | 11.35762 | 0.874417 | 1 B2M          | K08055 |
| ENSG00000135521 | -0.106397 | 5.753085 | 0.874621 | 1 LTV1         | K14798 |

|                 |           |           |          |                |        |
|-----------------|-----------|-----------|----------|----------------|--------|
| ENSG00000110107 | -0.103833 | 7.815115  | 0.874696 | 1 PRPF19       | K10599 |
| ENSG00000177683 | -0.106033 | 5.34858   | 0.874749 | 1 THAP5        | -      |
| ENSG00000116991 | 0.106521  | 4.841358  | 0.874797 | 1 SIPA1L2      | K17702 |
| ENSG00000134318 | 0.104287  | 6.91744   | 0.874817 | 1 ROCK2        | K17388 |
| ENSG00000115145 | -0.10918  | 4.577877  | 0.874828 | 1 STAM2        | K04705 |
| ENSG00000100425 | 0.107725  | 5.213038  | 0.874903 | 1 BRD1         | K11349 |
| ENSG00000105323 | 0.10356   | 7.841885  | 0.874921 | 1 HNRNPUL1     | K15047 |
| ENSG00000117480 | -0.223035 | 1.130975  | 0.87496  | 1 FAAH         | K15528 |
| ENSG00000151651 | -0.223035 | 1.130975  | 0.87496  | 1 ADAM8        | K06540 |
| ENSG00000185803 | -0.223035 | 1.130975  | 0.87496  | 1 SLC52A2      | -      |
| ENSG00000245146 | -0.223035 | 1.130975  | 0.87496  | 1 LINC01024    | -      |
| ENSG00000167005 | -0.104216 | 6.975933  | 0.874994 | 1 NUDT21       | K14397 |
| ENSG00000227372 | 0.108232  | 4.15713   | 0.875181 | 1 TP73-AS1     | -      |
| ENSG00000230311 | -0.158705 | 2.207979  | 0.87526  | 1 AC004074.3   | K17770 |
| ENSG00000143845 | 0.157159  | 2.195027  | 0.87526  | 1 ETNK2        | K00894 |
| ENSG00000056558 | 0.136744  | 2.205406  | 0.87526  | 1 TRAF1        | K03172 |
| ENSG00000224051 | -0.108132 | 4.907858  | 0.87532  | 1 GLTPD1       | -      |
| ENSG00000173327 | 0.103707  | 6.024641  | 0.875359 | 1 MAP3K11      | K04419 |
| ENSG00000214223 | -0.103873 | 5.762001  | 0.875406 | 1 HNRNPA1P10   | K12741 |
| ENSG00000125753 | -0.103957 | 6.861473  | 0.875447 | 1 VASP         | K06274 |
| ENSG00000111481 | -0.103087 | 8.017631  | 0.875468 | 1 COPZ1        | K05867 |
| ENSG00000160256 | 0.10583   | 5.885361  | 0.875522 | 1 FAM207A      | -      |
| ENSG00000100796 | -0.105438 | 6.106047  | 0.875551 | 1 SMEK1        | K17491 |
| ENSG00000174371 | 0.10369   | 6.881792  | 0.875575 | 1 EXO1         | K10746 |
| ENSG00000175611 | -0.11299  | 3.046675  | 0.875731 | 1 LINC00476    | -      |
| ENSG00000229119 | 0.107759  | 4.166937  | 0.875766 | 1 CTB-63M22.1  | K02941 |
| ENSG00000138029 | -0.103979 | 6.230944  | 0.87583  | 1 HADHB        | K07509 |
| ENSG00000160194 | -0.106499 | 5.948163  | 0.87583  | 1 NDUFV3       | K03944 |
| ENSG00000176102 | 0.105232  | 5.798945  | 0.875865 | 1 CSTF3        | K14408 |
| ENSG00000108406 | 0.104171  | 6.184     | 0.87587  | 1 DHX40        | K18711 |
| ENSG00000156171 | 0.103867  | 6.479791  | 0.875896 | 1 DRAM2        | -      |
| ENSG00000224631 | 0.10273   | 7.772538  | 0.875962 | 1 RP11-51O6.1  | K02977 |
| ENSG00000166886 | -0.107052 | 5.081022  | 0.876028 | 1 NAB2         | -      |
| ENSG00000196436 | -0.13082  | 2.551809  | 0.876084 | 1 NPIPB15      | -      |
| ENSG00000006712 | 0.103485  | 6.302138  | 0.87611  | 1 PAF1         | K15174 |
| ENSG00000111605 | -0.103182 | 7.048265  | 0.876152 | 1 CPSF6        | K14398 |
| ENSG00000029534 | -0.371702 | 0.050164  | 0.876186 | 1 ANK1         | K10380 |
| ENSG00000119737 | -0.371702 | 0.050164  | 0.876186 | 1 GPR75        | K08417 |
| ENSG00000139865 | -0.371702 | 0.050164  | 0.876186 | 1 TTC6         | -      |
| ENSG00000150667 | -0.371702 | 0.050164  | 0.876186 | 1 FSIP1        | -      |
| ENSG00000167555 | -0.371702 | 0.050164  | 0.876186 | 1 ZNF528       | K09228 |
| ENSG00000184923 | -0.371702 | 0.050164  | 0.876186 | 1 NUTM2A       | -      |
| ENSG00000262691 | -0.371702 | 0.050164  | 0.876186 | 1 CTC-277H1.7  | -      |
| ENSG00000266040 | -0.371702 | 0.050164  | 0.876186 | 1 CTB-58E17.3  | -      |
| ENSG00000272768 | -0.371702 | 0.050164  | 0.876186 | 1 RP4-673M15.1 | -      |
| ENSG00000172426 | 0.334575  | 0.030691  | 0.876186 | 1 RSPH9        | K19757 |
| ENSG00000186792 | 0.334575  | 0.030691  | 0.876186 | 1 HYAL3        | K01197 |
| ENSG00000226403 | 0.334575  | 0.030691  | 0.876186 | 1 RP11-31F19.1 | -      |
| ENSG00000231731 | 0.334575  | 0.030691  | 0.876186 | 1 AC010976.2   | -      |
| ENSG00000232457 | 0.334575  | 0.030691  | 0.876186 | 1 SLC16A6P1    | K08183 |
| ENSG00000271789 | 0.334575  | 0.030691  | 0.876186 | 1 RP5-1112D6.7 | -      |
| ENSG00000272087 | 0.334575  | 0.030691  | 0.876186 | 1 RP11-379F4.7 | -      |
| ENSG00000100385 | -0.279593 | -0.001446 | 0.876186 | 1 IL2RB        | K05069 |
| ENSG00000162620 | -0.279593 | -0.001446 | 0.876186 | 1 LRRIQ3       | -      |
| ENSG00000162814 | -0.279593 | -0.001446 | 0.876186 | 1 SPATA17      | -      |
| ENSG00000166317 | -0.279593 | -0.001446 | 0.876186 | 1 SYNPO2L      | K17985 |
| ENSG00000182368 | -0.279593 | -0.001446 | 0.876186 | 1 FAM27A       | -      |
| ENSG00000186715 | -0.279593 | -0.001446 | 0.876186 | 1 MST1L        | -      |

|                 |           |           |          |                 |        |
|-----------------|-----------|-----------|----------|-----------------|--------|
| ENSG00000231240 | -0.279593 | -0.001446 | 0.876186 | 1 KLF2P1        | K09537 |
| ENSG00000236404 | -0.279593 | -0.001446 | 0.876186 | 1 RP11-125B21.2 | -      |
| ENSG00000259684 | -0.279593 | -0.001446 | 0.876186 | 1 RP11-120K9.2  | -      |
| ENSG00000260349 | -0.279593 | -0.001446 | 0.876186 | 1 RP11-473I1.5  | -      |
| ENSG00000260805 | -0.279593 | -0.001446 | 0.876186 | 1 RP11-61J19.4  | -      |
| ENSG00000260879 | -0.279593 | -0.001446 | 0.876186 | 1 RP11-483I13.5 | -      |
| ENSG00000262888 | -0.279593 | -0.001446 | 0.876186 | 1 RP11-462G12.2 | -      |
| ENSG00000181038 | 0.104057  | 5.562244  | 0.876195 | 1 METTL23       | -      |
| ENSG00000151092 | 0.106861  | 5.180742  | 0.876225 | 1 NGLY1         | K01456 |
| ENSG00000105607 | -0.107217 | 4.666842  | 0.876279 | 1 GCDH          | K00252 |
| ENSG00000125741 | -0.103906 | 4.6651    | 0.876279 | 1 OPA3          | -      |
| ENSG00000173269 | 0.112307  | 4.174205  | 0.876345 | 1 MMRN2         | -      |
| ENSG00000159217 | 0.103439  | 6.444959  | 0.876463 | 1 IGF2BP1       | K17391 |
| ENSG00000121940 | -0.106604 | 4.979077  | 0.876467 | 1 CLCC1         | -      |
| ENSG00000141279 | 0.102533  | 7.245838  | 0.876595 | 1 NPEPPS        | K08776 |
| ENSG00000059145 | 0.108203  | 4.66925   | 0.87669  | 1 UNKL          | -      |
| ENSG00000137845 | -0.102982 | 6.801043  | 0.876697 | 1 ADAM10        | K06704 |
| ENSG00000164104 | -0.102145 | 7.836185  | 0.876714 | 1 HMGB2         | K11295 |
| ENSG00000182179 | -0.149696 | 1.779092  | 0.876722 | 1 UBA7          | K10698 |
| ENSG00000189190 | -0.149696 | 1.779092  | 0.876722 | 1 ZNF600        | -      |
| ENSG00000087338 | 0.10422   | 5.237672  | 0.87687  | 1 GMCL1         | K10485 |
| ENSG00000073350 | 0.103628  | 6.196018  | 0.876878 | 1 LLGL2         | K06094 |
| ENSG00000128245 | -0.102653 | 6.963348  | 0.876887 | 1 YWHAH         | K16198 |
| ENSG00000196976 | 0.112786  | 3.721138  | 0.876943 | 1 LAGE3         | K15902 |
| ENSG00000213080 | 0.124874  | 3.05154   | 0.876967 | 1 RP11-312J18.5 | K00802 |
| ENSG00000087152 | 0.10369   | 5.932098  | 0.876977 | 1 ATXN7L3       | K11363 |
| ENSG00000111328 | -0.103273 | 6.373109  | 0.877014 | 1 CDK2AP1       | -      |
| ENSG00000167840 | -0.107292 | 4.276875  | 0.877048 | 1 ZNF232        | K09230 |
| ENSG00000067334 | -0.10191  | 7.636538  | 0.877137 | 1 DNTTIP2       | -      |
| ENSG00000100934 | -0.102765 | 6.660354  | 0.877155 | 1 SEC23A        | K14006 |
| ENSG00000142552 | 0.102633  | 6.612608  | 0.877185 | 1 RCN3          | -      |
| ENSG00000178338 | -0.119902 | 3.258672  | 0.877231 | 1 ZNF354B       | K09228 |
| ENSG00000182957 | -0.119902 | 3.258672  | 0.877231 | 1 SPATA13       | K05769 |
| ENSG00000124593 | -0.113653 | 3.973518  | 0.877259 | 1 PRICKLE4      | K17772 |
| ENSG00000105053 | 0.107627  | 4.6076    | 0.877431 | 1 VRK3          | K08816 |
| ENSG00000163463 | -0.105484 | 4.990151  | 0.877454 | 1 KRTCAP2       | -      |
| ENSG00000015153 | -0.102898 | 5.29152   | 0.877468 | 1 YAF2          | K11468 |
| ENSG00000240230 | -0.105821 | 4.680576  | 0.877503 | 1 COX19         | K18183 |
| ENSG00000162512 | 0.104138  | 5.338709  | 0.877769 | 1 SDC3          | K16337 |
| ENSG00000176953 | -0.104646 | 5.383651  | 0.877804 | 1 NFATC2IP      | -      |
| ENSG00000156970 | 0.101657  | 7.069556  | 0.877815 | 1 BUB1B         | K06637 |
| ENSG00000164366 | -0.10433  | 5.724356  | 0.877843 | 1 CCDC127       | K16467 |
| ENSG00000114395 | 0.106407  | 4.089176  | 0.877986 | 1 CYB561D2      | K08371 |
| ENSG00000154217 | 0.104482  | 5.468244  | 0.8781   | 1 PITPNC1       | -      |
| ENSG00000138031 | 0.103049  | 5.946398  | 0.878163 | 1 ADCY3         | K08043 |
| ENSG00000066427 | -0.130893 | 3.078591  | 0.878179 | 1 ATXN3         | K11863 |
| ENSG00000272711 | -0.120851 | 3.073155  | 0.878179 | 1 RP11-259N19.1 | -      |
| ENSG00000132478 | -0.104147 | 5.301559  | 0.878259 | 1 UNK           | -      |
| ENSG00000058673 | -0.101028 | 7.557071  | 0.87826  | 1 ZC3H11A       | -      |
| ENSG00000164074 | -0.117871 | 3.276841  | 0.878288 | 1 C4orf29       | K12307 |
| ENSG00000134910 | 0.101116  | 7.224865  | 0.878318 | 1 STT3A         | K07151 |
| ENSG00000134202 | -0.101477 | 6.946393  | 0.878321 | 1 GSTM3         | K00799 |
| ENSG00000151718 | 0.101817  | 6.43586   | 0.878424 | 1 WWC2          | -      |
| ENSG00000092036 | -0.107    | 5.002515  | 0.878427 | 1 HAUS4         | K16587 |
| ENSG00000084072 | -0.102136 | 6.341028  | 0.878436 | 1 PPIE          | K09564 |
| ENSG00000102699 | -0.10331  | 6.007971  | 0.878515 | 1 PARP4         | K10798 |
| ENSG00000073008 | -0.101833 | 6.471238  | 0.878572 | 1 PVR           | K06539 |
| ENSG00000159111 | 0.104605  | 5.590748  | 0.878593 | 1 MRPL10        | K02864 |

|                 |           |          |          |                 |        |
|-----------------|-----------|----------|----------|-----------------|--------|
| ENSG00000104518 | -0.109065 | 4.387844 | 0.878649 | 1 GSDMD         | -      |
| ENSG00000189060 | 0.107336  | 4.888037 | 0.878732 | 1 H1FO          | K11275 |
| ENSG00000100151 | 0.103552  | 5.351662 | 0.878785 | 1 PICK1         | -      |
| ENSG00000146587 | 0.104176  | 5.517926 | 0.8788   | 1 RBAK          | K09228 |
| ENSG00000089693 | 0.100063  | 8.347445 | 0.87888  | 1 MLF2          | -      |
| ENSG00000074603 | 0.102317  | 5.559455 | 0.879021 | 1 DPP8          | K08655 |
| ENSG00000117399 | -0.100281 | 7.73242  | 0.879029 | 1 CDC20         | K03363 |
| ENSG00000177954 | 0.099669  | 9.387917 | 0.879047 | 1 RPS27         | K02978 |
| ENSG00000051825 | 0.104729  | 5.063617 | 0.879061 | 1 MPHOSPH9      | K16775 |
| ENSG00000118707 | 0.107278  | 4.950387 | 0.879072 | 1 TGIF2         | K19553 |
| ENSG00000172331 | -0.107922 | 4.553808 | 0.879116 | 1 BPGM          | K01837 |
| ENSG00000100485 | -0.104565 | 4.303739 | 0.879149 | 1 SOS2          | K03099 |
| ENSG00000186625 | 0.105928  | 4.205513 | 0.879162 | 1 KATNA1        | K07767 |
| ENSG00000167705 | 0.110945  | 3.88156  | 0.879214 | 1 RILP          | K13883 |
| ENSG00000181274 | -0.100861 | 5.484027 | 0.879256 | 1 FRAT2         | K03096 |
| ENSG00000075618 | -0.099606 | 8.906303 | 0.87928  | 1 FSCN1         | K17455 |
| ENSG00000078399 | 0.163615  | 1.164769 | 0.87929  | 1 HOXA9         | K09294 |
| ENSG00000161940 | 0.163615  | 1.164769 | 0.87929  | 1 BCL6B         | -      |
| ENSG00000167711 | 0.163615  | 1.164769 | 0.87929  | 1 SERPINF2      | K03983 |
| ENSG00000173013 | 0.163615  | 1.164769 | 0.87929  | 1 CCDC96        | -      |
| ENSG00000229833 | 0.163615  | 1.164769 | 0.87929  | 1 PET100        | K18186 |
| ENSG00000231064 | 0.163615  | 1.164769 | 0.87929  | 1 RP11-263K19.4 | -      |
| ENSG00000234769 | 0.163615  | 1.164769 | 0.87929  | 1 WASH4P        | K18461 |
| ENSG00000251669 | 0.163615  | 1.164769 | 0.87929  | 1 FAM86EP       | -      |
| ENSG00000185619 | 0.105077  | 5.218944 | 0.879323 | 1 PCGF3         | K11488 |
| ENSG00000168255 | -0.122108 | 2.860194 | 0.879416 | 1 POLR2J3       | K03008 |
| ENSG00000125995 | 0.100704  | 5.638209 | 0.879429 | 1 ROMO1         | -      |
| ENSG00000151135 | -0.10021  | 7.308493 | 0.879458 | 1 C12orf23      | K15031 |
| ENSG00000100478 | -0.142903 | 1.829066 | 0.879539 | 1 AP4S1         | K12403 |
| ENSG00000035928 | 0.100547  | 6.720137 | 0.879547 | 1 RFC1          | K10754 |
| ENSG00000101871 | -0.102134 | 5.712703 | 0.8796   | 1 MID1          | K08285 |
| ENSG00000176624 | 0.102323  | 5.173473 | 0.87962  | 1 MEX3C         | K15686 |
| ENSG00000184216 | 0.110233  | 4.394652 | 0.879621 | 1 IRAK1         | K04730 |
| ENSG00000124786 | -0.10536  | 5.123135 | 0.879644 | 1 SLC35B3       | K15277 |
| ENSG00000121680 | 0.104104  | 4.957474 | 0.87973  | 1 PEX16         | K13335 |
| ENSG00000053501 | -0.10443  | 4.114237 | 0.879765 | 1 USE1          | K08507 |
| ENSG00000123159 | 0.100139  | 6.89511  | 0.879827 | 1 GIPC1         | -      |
| ENSG00000197976 | 0.10026   | 6.325295 | 0.879879 | 1 AKAP17A       | K13169 |
| ENSG00000124217 | -0.111154 | 3.887237 | 0.879898 | 1 MOCS3         | K11996 |
| ENSG00000131931 | -0.111154 | 3.887237 | 0.879898 | 1 THAP1         | -      |
| ENSG00000125520 | -0.100191 | 5.997723 | 0.879962 | 1 SLC2A4RG      | -      |
| ENSG00000087157 | 0.104251  | 5.074076 | 0.879973 | 1 PGS1          | K10408 |
| ENSG00000196531 | -0.098856 | 9.667174 | 0.880001 | 1 NACA          | K03626 |
| ENSG00000146410 | -0.103372 | 4.402388 | 0.880101 | 1 MTFR2         | -      |
| ENSG00000164978 | -0.10443  | 5.22978  | 0.880141 | 1 NUDT2         | K01518 |
| ENSG00000186660 | 0.099788  | 6.971216 | 0.880165 | 1 ZFP91         | -      |
| ENSG00000130787 | 0.10184   | 5.941407 | 0.88017  | 1 HIP1R         | K04559 |
| ENSG00000154358 | 0.100262  | 6.494939 | 0.880201 | 1 OBSCN         | K17531 |
| ENSG00000138495 | 0.106259  | 4.710062 | 0.880268 | 1 COX17         | K02260 |
| ENSG00000141002 | 0.099947  | 6.569362 | 0.880471 | 1 TCF25         | -      |
| ENSG00000138246 | -0.102744 | 5.723528 | 0.880568 | 1 DNAJC13       | K09533 |
| ENSG00000184924 | 0.101288  | 4.407176 | 0.880578 | 1 PTRHD1        | -      |
| ENSG00000181924 | -0.100203 | 6.404506 | 0.880643 | 1 COA4          | -      |
| ENSG00000156973 | 0.105946  | 4.716753 | 0.880653 | 1 PDE6D         | K13758 |
| ENSG00000101421 | -0.099381 | 7.053241 | 0.880717 | 1 CHMP4B        | K12194 |
| ENSG00000181004 | -0.11939  | 2.884082 | 0.880773 | 1 BBS12         | K19402 |
| ENSG00000124228 | -0.100304 | 6.314842 | 0.880922 | 1 DDX27         | K13181 |
| ENSG00000067113 | -0.113065 | 4.129428 | 0.880922 | 1 PPAP2A        | K01080 |

|                 |           |          |          |                    |        |
|-----------------|-----------|----------|----------|--------------------|--------|
| ENSG00000119537 | -0.10037  | 6.065398 | 0.880991 | 1 KDSR             | K04708 |
| ENSG00000108294 | -0.098626 | 7.675029 | 0.881062 | 1 PSMB3            | K02735 |
| ENSG00000132801 | -0.123855 | 2.610232 | 0.881095 | 1 ZSWIM3           | K17604 |
| ENSG00000119599 | 0.118491  | 3.478946 | 0.881097 | 1 DCAF4            | K11799 |
| ENSG00000124172 | 0.098272  | 8.207648 | 0.8811   | 1 ATP5E            | K02135 |
| ENSG00000158109 | 0.102831  | 4.85508  | 0.881204 | 1 TPRG1L           | -      |
| ENSG00000159131 | -0.098467 | 7.712295 | 0.881228 | 1 GART             | K11787 |
| ENSG00000132781 | -0.103076 | 3.907733 | 0.881243 | 1 MUTYH            | K03575 |
| ENSG00000164068 | 0.104618  | 4.233781 | 0.881326 | 1 RNF123           | K12169 |
| ENSG00000189266 | -0.113962 | 3.31251  | 0.881353 | 1 PNRC2            | K18751 |
| ENSG00000141741 | 0.101552  | 5.698596 | 0.881389 | 1 MIEN1            | K07401 |
| ENSG00000198763 | -0.097576 | 10.93147 | 0.881392 | 1 MT-ND2           | K03879 |
| ENSG00000117984 | 0.098342  | 7.48134  | 0.881444 | 1 CTSD             | K01379 |
| ENSG00000172197 | -0.107222 | 4.136868 | 0.881492 | 1 MBOAT1           | K13517 |
| ENSG00000175416 | 0.098948  | 6.677902 | 0.881524 | 1 CLTB             | K04645 |
| ENSG00000144597 | 0.105293  | 4.657143 | 0.881537 | 1 EAF1             | K15186 |
| ENSG00000102886 | 0.151021  | 2.269865 | 0.881549 | 1 GDPD3            | -      |
| ENSG00000182196 | 0.151021  | 2.269865 | 0.881549 | 1 ARL6IP4          | -      |
| ENSG00000119396 | -0.098763 | 6.899442 | 0.881641 | 1 RAB14            | K07881 |
| ENSG00000159363 | -0.104919 | 4.583349 | 0.881671 | 1 ATP13A2          | K13526 |
| ENSG00000223768 | -0.116267 | 3.114144 | 0.881677 | 1 LINC00205        | -      |
| ENSG00000144476 | 0.109866  | 3.642569 | 0.881687 | 1 ACKR3            | K04304 |
| ENSG00000129245 | 0.098925  | 6.571666 | 0.881696 | 1 FXR2             | K15516 |
| ENSG00000230202 | 0.0979    | 7.867632 | 0.881723 | 1 RP11-632C17__A.1 | K02905 |
| ENSG00000114942 | -0.097529 | 8.51385  | 0.881924 | 1 EEF1B2           | K03232 |
| ENSG00000170921 | 0.101858  | 5.389836 | 0.881973 | 1 TANC2            | -      |
| ENSG00000077152 | -0.098796 | 6.581547 | 0.882042 | 1 UBE2T            | K13960 |
| ENSG00000112787 | -0.099212 | 5.809677 | 0.882124 | 1 FBRSL1           | -      |
| ENSG00000114062 | 0.098766  | 6.411317 | 0.882126 | 1 UBE3A            | K10587 |
| ENSG00000166170 | 0.10015   | 6.105874 | 0.882129 | 1 BAG5             | K09559 |
| ENSG00000109686 | -0.101171 | 5.520773 | 0.882162 | 1 SH3D19           | -      |
| ENSG00000198522 | -0.101171 | 5.520773 | 0.882162 | 1 GPN1             | K06883 |
| ENSG00000110536 | -0.100049 | 6.13504  | 0.882215 | 1 PTPMT1           | K14165 |
| ENSG00000258472 | 0.115155  | 1.840865 | 0.88223  | 1 RP11-192H23.4    | K17529 |
| ENSG00000130640 | 0.099231  | 6.1864   | 0.88224  | 1 TUBGCP2          | K16569 |
| ENSG00000116212 | -0.098462 | 6.713549 | 0.882249 | 1 LRRC42           | -      |
| ENSG00000156172 | -0.112079 | 3.33002  | 0.882341 | 1 C8orf37          | K17985 |
| ENSG00000086504 | -0.097922 | 7.161929 | 0.882356 | 1 MRPL28           | K02902 |
| ENSG00000156795 | -0.105694 | 4.247159 | 0.882379 | 1 WDYHV1           | -      |
| ENSG00000198836 | -0.098036 | 6.836016 | 0.882597 | 1 OPA1             | K17079 |
| ENSG00000143621 | -0.09679  | 8.993788 | 0.88265  | 1 ILF2             | K13089 |
| ENSG00000074621 | -0.106799 | 2.631086 | 0.882677 | 1 SLC24A1          | K13749 |
| ENSG00000196418 | -0.106799 | 2.631086 | 0.882677 | 1 ZNF124           | K09228 |
| ENSG00000133895 | 0.1025    | 5.054409 | 0.882767 | 1 MEN1             | K14970 |
| ENSG00000106853 | 0.097175  | 7.521768 | 0.88282  | 1 PTGR1            | K13948 |
| ENSG00000196810 | -0.11799  | 3.506387 | 0.882849 | 1 CTBP1-AS2        | -      |
| ENSG00000185420 | 0.109546  | 3.498638 | 0.882849 | 1 SMYD3            | K11426 |
| ENSG00000115687 | 0.103772  | 4.252324 | 0.882898 | 1 PASK             | K08801 |
| ENSG00000060491 | 0.097867  | 6.597266 | 0.882932 | 1 OGFR             | K08131 |
| ENSG00000146670 | 0.097722  | 6.686869 | 0.882987 | 1 CDCA5            | K17390 |
| ENSG00000177410 | 0.097313  | 7.095756 | 0.883016 | 1 ZFAS1            | -      |
| ENSG00000163848 | 0.097606  | 6.196601 | 0.88306  | 1 ZNF148           | -      |
| ENSG00000136942 | -0.096307 | 9.449544 | 0.88312  | 1 RPL35            | K02918 |
| ENSG00000141524 | -0.108504 | 4.351795 | 0.883143 | 1 TMC6             | K02355 |
| ENSG00000120451 | 0.103916  | 4.348064 | 0.883143 | 1 SNX19            | K17930 |
| ENSG00000196247 | 0.108621  | 3.928443 | 0.883205 | 1 ZNF107           | K09228 |
| ENSG00000178397 | 0.101769  | 4.879138 | 0.88325  | 1 FAM220A          | -      |
| ENSG00000042445 | 0.09784   | 6.383205 | 0.883283 | 1 RETSAT           | K09516 |

|                 |           |          |          |                 |        |
|-----------------|-----------|----------|----------|-----------------|--------|
| ENSG00000138162 | 0.098462  | 5.649615 | 0.883318 | 1 TACC2         | K14282 |
| ENSG00000141140 | 0.198421  | 1.21982  | 0.883327 | 1 MYO19         | -      |
| ENSG00000176024 | -0.158345 | 1.26131  | 0.883327 | 1 ZNF613        | -      |
| ENSG00000235636 | -0.158345 | 1.26131  | 0.883327 | 1 NUS1P1        | K19177 |
| ENSG00000188599 | 0.156803  | 1.241159 | 0.883327 | 1 NPIPP1        | -      |
| ENSG00000149806 | -0.096828 | 7.542117 | 0.883329 | 1 FAU           | K02983 |
| ENSG00000168883 | 0.097306  | 6.797894 | 0.883348 | 1 USP39         | K12847 |
| ENSG00000052841 | -0.097607 | 6.631925 | 0.883395 | 1 TTC17         | -      |
| ENSG00000161265 | 0.122535  | 2.901207 | 0.883398 | 1 U2AF1L4       | K12836 |
| ENSG00000260671 | 0.122535  | 2.901207 | 0.883398 | 1 RP11-278A23.2 | -      |
| ENSG00000212694 | -0.116761 | 2.907583 | 0.883398 | 1 AC084018.1    | -      |
| ENSG00000213189 | -0.116761 | 2.907583 | 0.883398 | 1 BTF3L4P2      | K01527 |
| ENSG00000246695 | -0.116761 | 2.907583 | 0.883398 | 1 RASSF8-AS1    | -      |
| ENSG00000103245 | 0.099811  | 5.116439 | 0.883489 | 1 NARFL         | -      |
| ENSG00000005700 | -0.097294 | 6.827552 | 0.8835   | 1 IBTK          | -      |
| ENSG00000203772 | -0.126446 | 2.307636 | 0.883507 | 1 SPRN          | -      |
| ENSG00000163481 | -0.102975 | 4.527409 | 0.88355  | 1 RNF25         | K10640 |
| ENSG00000168653 | -0.096854 | 7.242593 | 0.883561 | 1 NDUFS5        | K03938 |
| ENSG00000089335 | -0.107029 | 3.808016 | 0.883576 | 1 ZNF302        | K09228 |
| ENSG00000143418 | 0.096562  | 7.439227 | 0.883621 | 1 CERS2         | K04710 |
| ENSG00000171988 | 0.096998  | 5.954901 | 0.883646 | 1 JMJD1C        | K11449 |
| ENSG00000185049 | 0.102035  | 5.064934 | 0.883658 | 1 NELFA         | K15179 |
| ENSG00000120509 | -0.099866 | 5.322521 | 0.883665 | 1 PDZD11        | -      |
| ENSG00000160310 | -0.10295  | 5.121872 | 0.883773 | 1 PRMT2         | K11435 |
| ENSG00000101654 | 0.097267  | 5.498646 | 0.8838   | 1 RNMT          | K00565 |
| ENSG00000112983 | -0.097982 | 6.304348 | 0.883807 | 1 BRD8          | K11321 |
| ENSG00000003056 | -0.097348 | 6.527931 | 0.883866 | 1 M6PR          | K10089 |
| ENSG00000125356 | -0.096886 | 6.856214 | 0.883953 | 1 NDUFA1        | K03945 |
| ENSG00000197852 | 0.107899  | 4.057893 | 0.884071 | 1 FAM212B       | -      |
| ENSG00000159128 | -0.110242 | 3.347322 | 0.884268 | 1 IFNGR2        | K05133 |
| ENSG00000260708 | -0.110242 | 3.347322 | 0.884268 | 1 CTA-29F11.1   | -      |
| ENSG00000115216 | 0.096683  | 6.648456 | 0.884286 | 1 NRBP1         | K08875 |
| ENSG00000105778 | -0.101033 | 5.377336 | 0.884474 | 1 AVL9          | K14404 |
| ENSG00000079482 | -0.110631 | 3.948145 | 0.884478 | 1 OPHN1         | -      |
| ENSG00000169087 | -0.110631 | 3.948145 | 0.884478 | 1 HSPBAP1       | K19375 |
| ENSG00000108296 | -0.100367 | 4.834443 | 0.884478 | 1 CWC25         | -      |
| ENSG00000100294 | 0.101578  | 5.075383 | 0.884534 | 1 MCAT          | K00645 |
| ENSG00000130816 | -0.09594  | 7.341863 | 0.884569 | 1 DNMT1         | K00558 |
| ENSG00000117500 | -0.096385 | 6.812425 | 0.884613 | 1 TMED5         | K14825 |
| ENSG00000123415 | -0.099065 | 5.187092 | 0.884691 | 1 SMUG1         | K10800 |
| ENSG00000109511 | -0.238666 | 0.162897 | 0.884696 | 1 ANXA10        | K17097 |
| ENSG00000213433 | -0.238666 | 0.162897 | 0.884696 | 1 RP11-54C4.1   | K02942 |
| ENSG00000234694 | -0.238666 | 0.162897 | 0.884696 | 1 RP1-92O14.3   | -      |
| ENSG00000272449 | -0.238666 | 0.162897 | 0.884696 | 1 RP3-395M20.12 | -      |
| ENSG00000105887 | 0.096996  | 6.05662  | 0.88472  | 1 MTPN          | -      |
| ENSG00000196547 | -0.101278 | 5.23793  | 0.884761 | 1 MAN2A2        | K01231 |
| ENSG00000123505 | -0.09547  | 7.800093 | 0.884779 | 1 AMD1          | K01611 |
| ENSG00000215271 | -0.103249 | 4.176162 | 0.884802 | 1 HOMEZ         | -      |
| ENSG00000249641 | -0.159977 | 1.890397 | 0.884803 | 1 HOXC13-AS     | -      |
| ENSG00000137075 | -0.105092 | 4.544429 | 0.884814 | 1 RNF38         | K19041 |
| ENSG00000167880 | -0.099627 | 5.631913 | 0.884829 | 1 EVPL          | K10383 |
| ENSG00000176871 | 0.098561  | 5.8447   | 0.884915 | 1 WSB2          | K10342 |
| ENSG00000204859 | 0.102544  | 4.279697 | 0.884931 | 1 ZBTB48        | K10519 |
| ENSG00000150760 | 0.099217  | 5.189196 | 0.884959 | 1 DOCK1         | K13708 |
| ENSG00000083799 | 0.099945  | 4.699998 | 0.885005 | 1 CYLD          | K08601 |
| ENSG00000111775 | 0.095074  | 8.094842 | 0.885009 | 1 COX6A1        | K02266 |
| ENSG00000072110 | -0.095681 | 7.153035 | 0.885064 | 1 ACTN1         | K05699 |
| ENSG00000115307 | -0.095827 | 6.975968 | 0.885082 | 1 AUP1          | K19716 |

|                 |           |          |          |                 |        |
|-----------------|-----------|----------|----------|-----------------|--------|
| ENSG0000010539  | -0.099825 | 4.774839 | 0.885087 | 1 ZNF200        | K09228 |
| ENSG00000132485 | -0.094915 | 8.476816 | 0.885092 | 1 ZRANB2        | -      |
| ENSG00000159692 | 0.096015  | 6.598165 | 0.885157 | 1 CTBP1         | K04496 |
| ENSG00000125304 | -0.095161 | 7.764855 | 0.885175 | 1 TM9SF2        | K17086 |
| ENSG00000184785 | -0.095556 | 5.781268 | 0.885185 | 1 SMIM10        | -      |
| ENSG00000104852 | 0.094889  | 8.195257 | 0.885186 | 1 SNRNP70       | K11093 |
| ENSG00000108395 | -0.096748 | 5.975608 | 0.88522  | 1 TRIM37        | K10608 |
| ENSG00000153575 | 0.102004  | 4.071064 | 0.885229 | 1 TUBGCP5       | K16572 |
| ENSG00000090060 | -0.095233 | 7.513382 | 0.885274 | 1 PAPOLA        | K14376 |
| ENSG00000168078 | 0.095398  | 7.095427 | 0.885321 | 1 PBK           | K08865 |
| ENSG00000168172 | -0.10229  | 4.185822 | 0.885336 | 1 HOOK3         | K16536 |
| ENSG00000161016 | 0.094243  | 11.3352  | 0.885383 | 1 RPL8          | K02938 |
| ENSG00000155640 | 0.110792  | 2.324932 | 0.885401 | 1 C10orf12      | -      |
| ENSG00000107897 | -0.097262 | 5.638089 | 0.885418 | 1 ACBD5         | -      |
| ENSG00000121310 | -0.106372 | 4.285886 | 0.885429 | 1 ECHDC2        | -      |
| ENSG00000060138 | 0.094414  | 9.04839  | 0.885466 | 1 YBX3          | K06099 |
| ENSG00000116266 | -0.095081 | 5.948183 | 0.885505 | 1 STXBP3        | K15301 |
| ENSG00000006534 | 0.096192  | 6.201972 | 0.885563 | 1 ALDH3B1       | K00129 |
| ENSG00000132912 | 0.095442  | 6.095635 | 0.885619 | 1 DCTN4         | K10426 |
| ENSG00000133740 | -0.130839 | 2.673698 | 0.885717 | 1 E2F5          | K04682 |
| ENSG00000108559 | 0.095165  | 6.92753  | 0.885776 | 1 NUP88         | K14318 |
| ENSG00000104660 | -0.098611 | 5.605146 | 0.885784 | 1 LEPROTL1      | -      |
| ENSG00000189308 | -0.097722 | 5.250647 | 0.885788 | 1 LIN54         | -      |
| ENSG00000172315 | -0.100101 | 4.4771   | 0.886014 | 1 TP53RK        | K08851 |
| ENSG00000184831 | -0.097704 | 5.792382 | 0.886067 | 1 APOO          | -      |
| ENSG00000168096 | -0.102444 | 4.714351 | 0.886117 | 1 ANKS3         | K06588 |
| ENSG00000175216 | 0.094146  | 8.042712 | 0.886155 | 1 CKAP5         | K16803 |
| ENSG00000272888 | -0.096488 | 5.56959  | 0.886167 | 1 AC013394.2    | -      |
| ENSG00000156642 | -0.095222 | 6.694218 | 0.886173 | 1 NPTN          | -      |
| ENSG00000084463 | 0.094381  | 7.443255 | 0.886246 | 1 WBP11         | K12866 |
| ENSG00000164080 | 0.107175  | 3.697743 | 0.886257 | 1 RAD54L2       | -      |
| ENSG00000154122 | 0.095208  | 6.448957 | 0.886344 | 1 ANKH          | K09488 |
| ENSG00000091651 | -0.096366 | 5.489891 | 0.886352 | 1 ORC6          | K02608 |
| ENSG00000218891 | 0.098047  | 5.572421 | 0.886371 | 1 ZNF579        | -      |
| ENSG00000141510 | -0.097924 | 5.612333 | 0.886379 | 1 TP53          | K04451 |
| ENSG00000002822 | 0.096332  | 5.259608 | 0.886546 | 1 MAD1L1        | K06638 |
| ENSG00000165733 | -0.094951 | 6.650817 | 0.886562 | 1 BMS1          | K14569 |
| ENSG00000082641 | 0.093977  | 7.683519 | 0.886565 | 1 NFE2L1        | -      |
| ENSG00000164327 | 0.094334  | 7.021027 | 0.886678 | 1 RICTOR        | K08267 |
| ENSG00000124201 | 0.094216  | 6.191199 | 0.886743 | 1 ZNFX1         | K17985 |
| ENSG00000138443 | -0.096154 | 5.361426 | 0.88679  | 1 ABI2          | K05751 |
| ENSG00000124422 | 0.093724  | 7.723302 | 0.886845 | 1 USP22         | K11366 |
| ENSG00000076662 | -0.098589 | 4.572301 | 0.886863 | 1 ICAM3         | K06486 |
| ENSG00000104408 | 0.093111  | 9.663153 | 0.886914 | 1 EIF3E         | K03250 |
| ENSG00000131187 | 0.095805  | 4.094428 | 0.886924 | 1 FI2           | K01328 |
| ENSG00000154065 | -0.107137 | 3.981794 | 0.886942 | 1 ANKRD29       | -      |
| ENSG00000213859 | -0.103735 | 3.710867 | 0.886985 | 1 KCTD11        | -      |
| ENSG00000135047 | 0.093439  | 8.078532 | 0.88699  | 1 CTSL          | K01365 |
| ENSG00000123395 | 0.095625  | 6.245991 | 0.886995 | 1 C12orf44      | -      |
| ENSG00000130702 | 0.09315   | 8.883427 | 0.887036 | 1 LAMA5         | K06240 |
| ENSG00000183405 | -0.1067   | 3.381317 | 0.887044 | 1 RPS7P1        | K02993 |
| ENSG00000221823 | -0.09599  | 5.998417 | 0.887053 | 1 PPP3R1        | K06268 |
| ENSG00000235706 | -0.194716 | 1.281806 | 0.8871   | 1 DICER1-AS1    | -      |
| ENSG00000272077 | -0.194716 | 1.281806 | 0.8871   | 1 RP11-348P10.2 | -      |
| ENSG00000186468 | 0.092863  | 10.34306 | 0.887124 | 1 RPS23         | K02973 |
| ENSG00000175741 | -0.122716 | 2.959402 | 0.887127 | 1 RWDD4P2       | -      |
| ENSG00000133619 | 0.107992  | 2.953473 | 0.887127 | 1 KRBA1         | -      |
| ENSG00000183060 | 0.107992  | 2.953473 | 0.887127 | 1 LYSMD4        | -      |



|                 |           |          |          |             |        |
|-----------------|-----------|----------|----------|-------------|--------|
| ENSG00000102898 | -0.09436  | 6.730589 | 0.88716  | 1 NUTF2     | -      |
| ENSG00000104679 | -0.101264 | 4.656421 | 0.887234 | 1 R3HCC1    | -      |
| ENSG00000041982 | 0.12715   | 2.350321 | 0.887234 | 1 TNC       | K06252 |
| ENSG00000100092 | 0.159733  | 1.910288 | 0.887266 | 1 SH3BP1    | K12482 |
| ENSG00000167525 | 0.159733  | 1.910288 | 0.887266 | 1 PROCA1    | -      |
| ENSG00000162924 | 0.134715  | 1.92309  | 0.887266 | 1 REL       | K09254 |
| ENSG00000132204 | -0.130687 | 1.924134 | 0.887266 | 1 LINC00470 | -      |
| ENSG00000164066 | -0.130687 | 1.924134 | 0.887266 | 1 INTU      | K17985 |
| ENSG00000178917 | -0.130687 | 1.924134 | 0.887266 | 1 ZNF852    | K09229 |
| ENSG00000185347 | -0.130687 | 1.924134 | 0.887266 | 1 C14orf80  | -      |
| ENSG00000182963 | -0.095898 | 5.220392 | 0.887316 | 1 GJC1      | K07616 |
| ENSG00000177733 | -0.093184 | 8.047651 | 0.887387 | 1 HNRNPA0   | K12894 |
| ENSG00000115163 | 0.099791  | 5.055735 | 0.887392 | 1 CENPA     | K11495 |
| ENSG00000173273 | 0.098541  | 4.733375 | 0.887566 | 1 TNKS      | K10799 |
| ENSG00000085978 | 0.097836  | 5.222484 | 0.887572 | 1 ATG16L1   | K17890 |
| ENSG00000182197 | -0.093525 | 6.30436  | 0.887593 | 1 EXT1      | K02366 |
| ENSG00000124225 | 0.097207  | 5.547308 | 0.887601 | 1 PMEPA1    | -      |
| ENSG00000076554 | 0.092664  | 8.911121 | 0.887614 | 1 TPD52     | -      |
| ENSG00000161996 | -0.094749 | 6.203868 | 0.887659 | 1 WDR90     | -      |
| ENSG00000185201 | 0.094192  | 6.3684   | 0.887691 | 1 IFITM2    | K06566 |
| ENSG00000171314 | -0.093011 | 7.805407 | 0.887741 | 1 PGAM1     | K01834 |
| ENSG00000117640 | 0.097041  | 4.409271 | 0.887781 | 1 MTFR1L    | K16800 |
| ENSG00000188785 | -0.111448 | 3.566729 | 0.887809 | 1 ZNF548    | K09228 |
| ENSG00000176903 | -0.095345 | 5.175002 | 0.887869 | 1 PNMA1     | -      |
| ENSG00000163875 | -0.09347  | 6.097137 | 0.887875 | 1 MEAF6     | K11344 |
| ENSG00000175376 | -0.098118 | 5.119343 | 0.887914 | 1 EIF1AD    | K15025 |
| ENSG00000100600 | -0.094045 | 6.458858 | 0.88795  | 1 LGMN      | K01369 |
| ENSG00000134884 | -0.092976 | 7.522244 | 0.887988 | 1 ARGLU1    | K13173 |
| ENSG00000080546 | -0.099551 | 4.111656 | 0.888027 | 1 SESN1     | K10141 |
| ENSG00000104823 | 0.092981  | 7.313555 | 0.888038 | 1 ECH1      | K12663 |
| ENSG00000182199 | -0.092341 | 8.679669 | 0.888122 | 1 SHMT2     | K00600 |
| ENSG00000113141 | 0.09286   | 7.388525 | 0.888123 | 1 IK        | K13109 |
| ENSG00000217128 | 0.097246  | 4.50319  | 0.888136 | 1 FNIP1     | -      |
| ENSG00000100225 | 0.092959  | 7.223067 | 0.888142 | 1 FBXO7     | K10293 |
| ENSG00000144895 | 0.093028  | 7.124006 | 0.88815  | 1 EIF2A     | K15026 |
| ENSG00000169926 | 0.093006  | 7.020345 | 0.888278 | 1 KLF13     | -      |
| ENSG00000185825 | 0.100598  | 4.324196 | 0.888325 | 1 BCAP31    | K14009 |
| ENSG00000108639 | -0.093321 | 6.70561  | 0.888444 | 1 SYNGR2    | -      |
| ENSG00000125755 | 0.093098  | 6.762349 | 0.888456 | 1 SYMPK     | K06100 |
| ENSG00000037757 | -0.098606 | 5.335606 | 0.88846  | 1 MRI1      | K08963 |
| ENSG00000171307 | 0.094829  | 5.822383 | 0.888463 | 1 ZDHHC16   | K18932 |
| ENSG00000137970 | 0.091968  | 8.340241 | 0.888649 | 1 RPL7P9    | K02937 |
| ENSG00000158987 | 0.105884  | 3.406565 | 0.888822 | 1 RAPGEF6   | K08020 |
| ENSG00000129250 | 0.092059  | 7.665901 | 0.88889  | 1 KIF1C     | K10392 |
| ENSG00000099910 | 0.099176  | 3.87574  | 0.8889   | 1 KLHL22    | K07604 |
| ENSG00000074370 | 0.095404  | 4.229189 | 0.88894  | 1 ATP2A3    | K05853 |
| ENSG00000178295 | -0.095469 | 4.752226 | 0.888978 | 1 GEN1      | K15338 |
| ENSG00000147454 | 0.094729  | 5.86441  | 0.889074 | 1 SLC25A37  | K15113 |
| ENSG00000120805 | -0.092836 | 6.664286 | 0.889087 | 1 ARL1      | K07942 |
| ENSG00000176170 | -0.093248 | 6.343215 | 0.889108 | 1 SPHK1     | K04718 |
| ENSG00000147251 | 0.10587   | 3.216742 | 0.889108 | 1 DOCK11    | -      |
| ENSG00000050405 | -0.091504 | 8.581474 | 0.889169 | 1 LIMA1     | -      |
| ENSG00000133065 | 0.094295  | 5.191607 | 0.889171 | 1 SLC41A1   | K15122 |
| ENSG00000188612 | -0.09174  | 7.954416 | 0.889183 | 1 SUMO2     | K12160 |
| ENSG00000114573 | 0.093522  | 5.934235 | 0.889279 | 1 ATP6V1A   | K02145 |
| ENSG00000078043 | -0.098569 | 4.011907 | 0.889303 | 1 PIAS2     | K16063 |
| ENSG00000123144 | 0.091985  | 7.100855 | 0.889429 | 1 C19orf43  | -      |
| ENSG00000158710 | 0.091067  | 9.312168 | 0.889448 | 1 TAGLN2    | -      |

|                 |           |          |          |                 |        |
|-----------------|-----------|----------|----------|-----------------|--------|
| ENSG00000103126 | 0.092711  | 6.379505 | 0.889454 | 1 AXIN1         | K02157 |
| ENSG00000137764 | 0.100226  | 4.431785 | 0.889535 | 1 MAP2K5        | K04463 |
| ENSG00000153113 | 0.091116  | 8.655634 | 0.889562 | 1 CAST          | K04281 |
| ENSG00000122359 | 0.091826  | 7.156348 | 0.889568 | 1 ANXA11        | K17095 |
| ENSG00000137275 | -0.092619 | 5.487939 | 0.88957  | 1 RIPK1         | K02861 |
| ENSG00000007376 | -0.092589 | 6.12064  | 0.889659 | 1 RPUSD1        | -      |
| ENSG00000157778 | 0.092391  | 6.496858 | 0.88966  | 1 PSMG3         | K11877 |
| ENSG00000073803 | 0.099852  | 4.341617 | 0.889719 | 1 MAP3K13       | K04422 |
| ENSG00000055211 | -0.09537  | 5.695048 | 0.889744 | 1 GINM1         | -      |
| ENSG00000167900 | 0.091661  | 7.092198 | 0.889828 | 1 TK1           | K00857 |
| ENSG00000155660 | -0.091025 | 8.216041 | 0.889905 | 1 PDIA4         | K09582 |
| ENSG00000111206 | -0.091758 | 7.04234  | 0.889907 | 1 FOXM1         | K09406 |
| ENSG00000084652 | -0.091967 | 6.792017 | 0.889958 | 1 TXLNA         | -      |
| ENSG00000177646 | -0.092456 | 6.398306 | 0.889963 | 1 ACAD9         | K15980 |
| ENSG00000100258 | 0.0919    | 6.659331 | 0.890028 | 1 LMF2          | -      |
| ENSG00000116903 | 0.09563   | 5.0935   | 0.890191 | 1 EXOC8         | -      |
| ENSG00000088387 | 0.093717  | 5.810704 | 0.890196 | 1 DOCK9         | -      |
| ENSG00000153037 | -0.092794 | 5.776481 | 0.890281 | 1 SRP19         | K03105 |
| ENSG00000089006 | -0.091711 | 6.704776 | 0.890383 | 1 SNX5          | K17920 |
| ENSG00000223855 | 0.096661  | 3.427268 | 0.890544 | 1 AC147651.3    | -      |
| ENSG00000123975 | -0.091135 | 7.092672 | 0.890604 | 1 CKS2          | K02219 |
| ENSG00000092439 | -0.091854 | 6.438792 | 0.890618 | 1 TRPM7         | K04982 |
| ENSG00000152270 | 0.10585   | 2.998124 | 0.890624 | 1 PDE3B         | K13296 |
| ENSG00000163083 | -0.18274  | 1.351736 | 0.890635 | 1 INHBB         | K04667 |
| ENSG00000179476 | -0.18274  | 1.351736 | 0.890635 | 1 C14orf28      | -      |
| ENSG00000235944 | 0.150697  | 1.313696 | 0.890635 | 1 ZNF815P       | K09228 |
| ENSG00000176927 | -0.148115 | 1.332281 | 0.890635 | 1 EFCAB5        | -      |
| ENSG00000224818 | -0.148115 | 1.332281 | 0.890635 | 1 RP11-134G8.8  | -      |
| ENSG00000069696 | 0.112395  | 1.33358  | 0.890635 | 1 DRD4          | K04147 |
| ENSG00000070371 | 0.112395  | 1.33358  | 0.890635 | 1 CLTCL1        | K04646 |
| ENSG00000149564 | 0.112395  | 1.33358  | 0.890635 | 1 ESAM          | K06787 |
| ENSG00000198380 | -0.09077  | 7.432479 | 0.890722 | 1 GFPT1         | K00820 |
| ENSG00000126249 | -0.097224 | 4.624766 | 0.890749 | 1 PDCD2L        | K14801 |
| ENSG00000022840 | 0.090776  | 7.21835  | 0.890778 | 1 RNF10         | -      |
| ENSG00000085733 | 0.090569  | 7.519345 | 0.890788 | 1 CTTN          | K06106 |
| ENSG00000159377 | -0.090234 | 8.371186 | 0.890789 | 1 PSMB4         | K02736 |
| ENSG00000140987 | 0.097106  | 4.845976 | 0.890833 | 1 ZSCAN32       | K09228 |
| ENSG00000186416 | -0.092515 | 5.631917 | 0.890854 | 1 NKRF          | -      |
| ENSG00000108179 | -0.090545 | 7.559449 | 0.890891 | 1 PPIF          | K09565 |
| ENSG00000112200 | -0.091514 | 6.486507 | 0.890949 | 1 ZNF451        | -      |
| ENSG00000151893 | 0.090899  | 6.885084 | 0.890961 | 1 CACUL1        | -      |
| ENSG00000127080 | 0.098368  | 4.031409 | 0.89101  | 1 IPPK          | K10572 |
| ENSG00000198732 | -0.090967 | 6.803055 | 0.891148 | 1 SMOC1         | -      |
| ENSG00000107968 | 0.096213  | 4.708431 | 0.891252 | 1 MAP3K8        | K04415 |
| ENSG00000165124 | -0.091305 | 6.444845 | 0.891269 | 1 SVEP1         | K17495 |
| ENSG00000106263 | 0.089628  | 8.867149 | 0.891294 | 1 EIF3B         | K03253 |
| ENSG00000172809 | -0.089678 | 8.798161 | 0.891298 | 1 RPL38         | K12581 |
| ENSG00000237686 | -0.108713 | 2.746755 | 0.891349 | 1 RP5-1120P11.1 | -      |
| ENSG00000182372 | 0.105823  | 2.740394 | 0.891349 | 1 CLN8          | -      |
| ENSG00000172830 | -0.097147 | 4.548136 | 0.891373 | 1 SSH3          | K05766 |
| ENSG00000172765 | 0.103719  | 3.90819  | 0.891384 | 1 TMCC1         | -      |
| ENSG00000073584 | 0.091522  | 6.025291 | 0.891488 | 1 SMARCE1       | K11651 |
| ENSG00000125835 | -0.089804 | 7.979829 | 0.891505 | 1 SNRPB         | K11086 |
| ENSG00000153827 | 0.091225  | 5.99603  | 0.891588 | 1 TRIP12        | K10590 |
| ENSG00000013306 | -0.089514 | 8.506683 | 0.891602 | 1 SLC25A39      | K15119 |
| ENSG00000126746 | 0.090696  | 5.932795 | 0.89165  | 1 ZNF384        | -      |
| ENSG00000078674 | 0.090737  | 6.433289 | 0.891746 | 1 PCM1          | K16537 |
| ENSG00000079313 | 0.093296  | 5.278951 | 0.891754 | 1 REXO1         | K14570 |

|                 |           |          |          |                  |          |
|-----------------|-----------|----------|----------|------------------|----------|
| ENSG00000104915 | -0.091197 | 6.176865 | 0.891813 | 1 STX10          | K08498   |
| ENSG00000214176 | -0.147146 | 1.981602 | 0.891888 | 1 PLEKHM1P       | -        |
| ENSG00000106479 | 0.107849  | 1.980967 | 0.891888 | 1 ZNF862         | -        |
| ENSG00000154429 | 0.092525  | 4.716813 | 0.891952 | 1 CCSAP          | K16454   |
| ENSG00000163734 | 0.206774  | 0.23912  | 0.89207  | 1 CXCL3          | K05505   |
| ENSG00000234949 | 0.206774  | 0.23912  | 0.89207  | 1 AC104667.3     | K15696   |
| ENSG00000252690 | 0.206774  | 0.23912  | 0.89207  | 1 SCARNA15       | -        |
| ENSG00000266904 | 0.206774  | 0.23912  | 0.89207  | 1 LINC00663      | -        |
| ENSG00000270441 | 0.206774  | 0.23912  | 0.89207  | 1 RP11-694I15.7  | K06243   |
| ENSG00000271833 | 0.206774  | 0.23912  | 0.89207  | 1 RP11-356B19.11 | -        |
| ENSG00000271895 | 0.206774  | 0.23912  | 0.89207  | 1 RP4-635E18.8   | -        |
| ENSG00000272787 | 0.206774  | 0.23912  | 0.89207  | 1 KB-226F1.2     | -        |
| ENSG00000154511 | -0.100617 | 4.046831 | 0.89212  | 1 FAM69A         | -        |
| ENSG00000135723 | -0.093135 | 5.524589 | 0.892224 | 1 FHOD1          | -        |
| ENSG00000105676 | 0.092433  | 5.523659 | 0.892224 | 1 ARMC6          | -        |
| ENSG00000146281 | -0.093065 | 5.062745 | 0.892282 | 1 PM20D2         | K17985   |
| ENSG00000118515 | 0.088622  | 9.642412 | 0.892342 | 1 SGK1           | K13302   |
| ENSG00000183291 | -0.088864 | 8.559348 | 0.892366 | 1                | 15-Sep - |
| ENSG00000166452 | 0.09142   | 6.10011  | 0.892514 | 1 AKIP1          | -        |
| ENSG00000183513 | 0.094668  | 5.18197  | 0.892629 | 1 COA5           | K18178   |
| ENSG00000108784 | -0.091922 | 5.237918 | 0.892662 | 1 NAGLU          | K01205   |
| ENSG00000179750 | 0.089466  | 4.801073 | 0.892687 | 1 APOBEC3B       | K18750   |
| ENSG00000137509 | 0.088686  | 7.712647 | 0.89293  | 1 PRCP           | K01285   |
| ENSG00000164919 | -0.08857  | 8.084318 | 0.892937 | 1 COX6C          | K02268   |
| ENSG00000102870 | -0.10911  | 3.272131 | 0.89295  | 1 ZNF629         | K09228   |
| ENSG00000160058 | 0.092324  | 5.847742 | 0.892954 | 1 BSDC1          | -        |
| ENSG00000180574 | -0.094572 | 4.652907 | 0.892955 | 1 EIF2S3L        | K03242   |
| ENSG00000095203 | -0.09679  | 4.806504 | 0.893012 | 1 EPB41L4B       | -        |
| ENSG00000129473 | 0.095894  | 4.876173 | 0.893036 | 1 BCL2L2         | K02163   |
| ENSG00000233913 | 0.091679  | 5.1303   | 0.893113 | 1 CTC-575D19.1   | K02866   |
| ENSG00000108523 | 0.08902   | 6.958526 | 0.893146 | 1 RNF167         | K15706   |
| ENSG00000134186 | -0.089021 | 7.012785 | 0.89324  | 1 PRPF38B        | K12850   |
| ENSG00000129347 | 0.090283  | 6.200168 | 0.893567 | 1 KRI1           | K14786   |
| ENSG00000213553 | 0.088367  | 7.33516  | 0.893586 | 1 RPLP0P6        | K02941   |
| ENSG00000089486 | 0.092967  | 4.951847 | 0.893644 | 1 CDIP1          | -        |
| ENSG00000214078 | -0.089394 | 6.385788 | 0.893668 | 1 CPNE1          | -        |
| ENSG00000116985 | 0.094598  | 4.662402 | 0.893671 | 1 BMP8B          | K16622   |
| ENSG00000117569 | 0.094256  | 4.578588 | 0.89368  | 1 PTBP2          | K14948   |
| ENSG00000153814 | -0.094836 | 4.490781 | 0.893689 | 1 JAZF1          | K19495   |
| ENSG00000113580 | 0.088671  | 6.818998 | 0.893721 | 1 NR3C1          | K05771   |
| ENSG00000172757 | -0.087512 | 9.553188 | 0.893726 | 1 CFL1           | K05765   |
| ENSG00000122218 | 0.087779  | 8.244946 | 0.893748 | 1 COPA           | K05236   |
| ENSG00000011454 | 0.090693  | 5.670435 | 0.893771 | 1 RABGAP1        | K09488   |
| ENSG00000172840 | -0.100984 | 3.804803 | 0.893781 | 1 PDP2           | K01102   |
| ENSG00000146938 | -0.102598 | 3.652775 | 0.893806 | 1 NLGN4X         | K07378   |
| ENSG00000126107 | 0.092288  | 5.305821 | 0.893844 | 1 HECTD3         | K12233   |
| ENSG00000152433 | 0.145192  | 1.382752 | 0.893954 | 1 ZNF547         | K09228   |
| ENSG00000224281 | 0.145192  | 1.382752 | 0.893954 | 1 SLC25A5-AS1    | -        |
| ENSG00000224738 | -0.138895 | 1.399945 | 0.893954 | 1 AC099850.1     | -        |
| ENSG00000226287 | -0.138895 | 1.399945 | 0.893954 | 1 TMEM191A       | -        |
| ENSG00000215788 | -0.11849  | 2.779346 | 0.893961 | 1 TNFRSF25       | K05160   |
| ENSG00000261115 | -0.11849  | 2.779346 | 0.893961 | 1 TMEM178B       | -        |
| ENSG00000109736 | -0.091066 | 5.547265 | 0.893987 | 1 MFSD10         | -        |
| ENSG00000106615 | 0.088216  | 7.079912 | 0.893994 | 1 RHEB           | K07208   |
| ENSG00000089820 | -0.111157 | 2.442361 | 0.894017 | 1 ARHGAP4        | K07526   |
| ENSG00000196074 | -0.111157 | 2.442361 | 0.894017 | 1 SYCP2          | K19529   |
| ENSG00000235477 | -0.111157 | 2.442361 | 0.894017 | 1 RP11-122G18.5  | -        |
| ENSG00000130487 | 0.128736  | 2.012935 | 0.894059 | 1 KLHDC7B        | -        |

|                 |           |          |          |              |              |
|-----------------|-----------|----------|----------|--------------|--------------|
| ENSG00000101019 | -0.09061  | 5.593394 | 0.89416  | 1 UQCC1      | K17662       |
| ENSG00000131828 | -0.08723  | 9.058254 | 0.89418  | 1 PDHA1      | K00161       |
| ENSG00000102572 | 0.08794   | 7.179821 | 0.894233 | 1 STK24      | K08838       |
| ENSG00000141560 | -0.090181 | 5.638093 | 0.894323 | 1 FN3KRP     | K15523       |
| ENSG00000143367 | -0.088542 | 5.596116 | 0.894346 | 1 TUFT1      | K12581       |
| ENSG00000103429 | 0.088874  | 6.240181 | 0.894406 | 1 BFAR       | K15684       |
| ENSG00000123815 | 0.090233  | 4.587762 | 0.894427 | 1 ADCK4      | K08869       |
| ENSG00000144524 | -0.091281 | 5.367807 | 0.894489 | 1 COPS7B     | K12180       |
| ENSG00000162244 | 0.087006  | 8.724855 | 0.894506 | 1 RPL29      | K02905       |
| ENSG00000213614 | -0.088358 | 6.067387 | 0.89452  | 1 HEXA       | K12373       |
| ENSG00000124688 | 0.089708  | 5.315771 | 0.894523 | 1 MAD2L1BP   | -            |
| ENSG00000165392 | -0.098584 | 4.408561 | 0.894546 | 1 WRN        | K10900       |
| ENSG00000113658 | 0.089356  | 6.157778 | 0.894586 | 1 SMAD5      | K16790       |
| ENSG00000232388 | 0.094065  | 4.676199 | 0.894727 | 1 LINC00493  | -            |
| ENSG00000259917 | -0.107236 | 3.290136 | 0.894774 | 1 HNRNPLP2   | K13159       |
| ENSG00000176715 | 0.088938  | 5.514089 | 0.894791 | 1 ACSF3      | K18660       |
| ENSG00000186594 | 0.096217  | 4.084114 | 0.894797 | 1 MIR22HG    | -            |
| ENSG00000131375 | 0.090202  | 5.684152 | 0.894825 | 1 CAPN7      | K08576       |
| ENSG00000114098 | -0.090897 | 5.372047 | 0.894922 | 1 ARMC8      | -            |
| ENSG00000142949 | -0.086737 | 8.13776  | 0.895124 | 1 PTPRF      | K05695       |
| ENSG00000071859 | -0.101224 | 3.666631 | 0.895206 | 1 FAM50A     | K13119       |
| ENSG00000134698 | -0.115679 | 2.804598 | 0.895221 | 1 AGO4       | K11593       |
| ENSG00000113558 | 0.08646   | 8.548713 | 0.895224 | 1 SKP1       | K03094       |
| ENSG00000144659 | -0.088618 | 5.274617 | 0.895255 | 1 SLC25A38   | K15118       |
| ENSG00000221968 | -0.08741  | 6.919545 | 0.89529  | 1 FADS3      | K10225       |
| ENSG00000171680 | -0.093079 | 4.422901 | 0.895379 | 1 PLEKHG5    | K19464       |
| ENSG00000112149 | -0.087672 | 5.477153 | 0.895434 | 1 CD83       | K06510       |
| ENSG00000069424 | 0.089716  | 4.602287 | 0.895529 | 1 KCNAB2     | K04883       |
| ENSG00000204682 | -0.088203 | 4.605039 | 0.895529 | 1 CASC10     | K09228       |
| ENSG00000164897 | 0.0866    | 6.051316 | 0.895625 | 1 TMUB1      | -            |
| ENSG00000182095 | -0.087296 | 6.735561 | 0.89566  | 1 TNRC18     | -            |
| ENSG00000183726 | -0.08709  | 6.931447 | 0.895662 | 1 TMEM50A    | -            |
| ENSG00000179454 | 0.110907  | 3.303608 | 0.895662 | 1 KLHL28     | K10464       |
| ENSG00000166912 | -0.096804 | 3.303315 | 0.895662 | 1 MTMR10     | K18085       |
| ENSG00000100908 | 0.094899  | 3.830256 | 0.895664 | 1 EMC9       | -            |
| ENSG00000136536 | 0.087556  | 6.375796 | 0.895664 | 1            | 7-Mar K10662 |
| ENSG00000148335 | -0.087462 | 6.232154 | 0.89586  | 1 NTMT1      | K16219       |
| ENSG00000185651 | 0.086312  | 7.546566 | 0.895907 | 1 UBE2L3     | K04552       |
| ENSG00000224578 | -0.08744  | 6.442843 | 0.895924 | 1 HNRNPA1P48 | K12741       |
| ENSG00000071082 | 0.085661  | 9.618369 | 0.895928 | 1 RPL31      | K02910       |
| ENSG00000203950 | -0.088796 | 5.530292 | 0.895953 | 1 FAM127B    | -            |
| ENSG00000110619 | -0.08671  | 7.046679 | 0.89599  | 1 CARS       | K01883       |
| ENSG00000168522 | -0.090071 | 5.619488 | 0.895993 | 1 FNTA       | K05955       |
| ENSG00000120948 | -0.086005 | 8.015186 | 0.896074 | 1 TARDBP     | -            |
| ENSG00000158019 | -0.086992 | 5.439261 | 0.896112 | 1 BRE        | K12173       |
| ENSG00000143570 | -0.085895 | 8.136674 | 0.896142 | 1 SLC39A1    | K14709       |
| ENSG00000178952 | -0.085776 | 8.403937 | 0.896162 | 1 TUFM       | K02358       |
| ENSG00000169583 | -0.094068 | 3.509837 | 0.896176 | 1 CLIC3      | K05023       |
| ENSG00000148943 | -0.08767  | 5.705173 | 0.896198 | 1 LIN7C      | K04613       |
| ENSG00000177885 | 0.087061  | 6.390512 | 0.896237 | 1 GRB2       | K04364       |
| ENSG00000145241 | -0.09738  | 3.841921 | 0.896277 | 1 CENPC      | K11497       |
| ENSG00000166136 | -0.091944 | 4.923782 | 0.896324 | 1 NDUFB8     | K03964       |
| ENSG00000121274 | 0.090166  | 4.107267 | 0.896341 | 1 PAPD5      | K03514       |
| ENSG00000170846 | 0.090166  | 4.107267 | 0.896341 | 1 AC093323.3 | -            |
| ENSG00000134996 | 0.089192  | 5.055759 | 0.896351 | 1 OSTF1      | -            |
| ENSG00000203896 | 0.102288  | 2.817166 | 0.896452 | 1 LIME1      | -            |
| ENSG00000179262 | -0.085825 | 7.663898 | 0.896513 | 1 RAD23A     | K10839       |
| ENSG00000142197 | -0.095123 | 3.320941 | 0.896536 | 1 DOPEY2     | K12581       |

|                 |           |          |          |                 |        |
|-----------------|-----------|----------|----------|-----------------|--------|
| ENSG00000169992 | 0.086736  | 6.431245 | 0.896566 | 1 NLGN2         | K07378 |
| ENSG00000134222 | -0.089049 | 5.670302 | 0.89662  | 1 PSRC1         | -      |
| ENSG00000143771 | -0.088041 | 6.157351 | 0.896621 | 1 CNIH4         | -      |
| ENSG00000121766 | 0.086661  | 6.127342 | 0.896684 | 1 ZCCHC17       | K11723 |
| ENSG00000134644 | -0.086371 | 6.774126 | 0.896724 | 1 PUM1          | K17943 |
| ENSG00000129562 | 0.08662   | 6.37209  | 0.896797 | 1 DAD1          | K12668 |
| ENSG00000168003 | 0.084776  | 10.84336 | 0.896862 | 1 SLC3A2        | K06519 |
| ENSG00000123064 | 0.085813  | 7.093779 | 0.896879 | 1 DDX54         | K14808 |
| ENSG00000239857 | 0.100843  | 3.518061 | 0.896934 | 1 GET4          | -      |
| ENSG00000133872 | -0.08572  | 7.283456 | 0.896947 | 1 TMEM66        | -      |
| ENSG00000198231 | 0.085503  | 7.389013 | 0.897    | 1 DDX42         | K12835 |
| ENSG00000072121 | 0.090606  | 4.231567 | 0.897061 | 1 ZFYVE26       | K19027 |
| ENSG00000186086 | 0.175681  | 1.430391 | 0.897076 | 1 NBPF6         | -      |
| ENSG00000228109 | 0.175681  | 1.430391 | 0.897076 | 1 MFI2-AS1      | -      |
| ENSG00000186010 | -0.088326 | 5.352865 | 0.897155 | 1 NDUFA13       | K11353 |
| ENSG00000138433 | 0.088259  | 4.537653 | 0.897171 | 1 CIR1          | K06066 |
| ENSG00000105583 | 0.086309  | 6.349131 | 0.897208 | 1 WDR83OS       | -      |
| ENSG00000118655 | 0.087103  | 5.190417 | 0.897337 | 1 DCLRE1B       | K15341 |
| ENSG00000104341 | -0.084416 | 9.187273 | 0.897551 | 1 LAPTM4B       | K12387 |
| ENSG00000135597 | -0.091327 | 4.797052 | 0.897558 | 1 REPS1         | -      |
| ENSG00000011478 | 0.085095  | 6.015138 | 0.897642 | 1 QPCTL         | K00683 |
| ENSG00000108773 | -0.124922 | 2.835906 | 0.897654 | 1 KAT2A         | K06062 |
| ENSG00000169169 | -0.124922 | 2.835906 | 0.897654 | 1 CPT1C         | K19524 |
| ENSG00000144040 | -0.112966 | 2.829417 | 0.897654 | 1 SFXN5         | K12484 |
| ENSG00000183891 | -0.107351 | 3.532969 | 0.89768  | 1 TTC32         | -      |
| ENSG00000079150 | -0.100015 | 3.529055 | 0.89768  | 1 FKBP7         | K09573 |
| ENSG00000169764 | -0.084966 | 7.349731 | 0.897799 | 1 UGP2          | K00963 |
| ENSG00000177239 | -0.086148 | 6.260453 | 0.897829 | 1 MAN1B1        | K01230 |
| ENSG00000147533 | -0.089155 | 5.414807 | 0.897855 | 1 GOLGA7        | -      |
| ENSG00000120889 | 0.085143  | 6.87911  | 0.897908 | 1 TNFRSF10B     | K04722 |
| ENSG00000169490 | 0.086334  | 5.645231 | 0.897937 | 1 TM2D2         | -      |
| ENSG00000147010 | -0.088592 | 5.140608 | 0.897984 | 1 SH3KBP1       | K12470 |
| ENSG00000104221 | 0.101036  | 3.104047 | 0.898    | 1 BRF2          | K15197 |
| ENSG00000048828 | -0.084468 | 7.871525 | 0.898016 | 1 FAM120A       | -      |
| ENSG00000163249 | -0.092602 | 4.94813  | 0.898034 | 1 CCNYL1        | -      |
| ENSG00000173889 | 0.090271  | 4.947596 | 0.898034 | 1 PHC3          | K11458 |
| ENSG00000133789 | -0.084997 | 7.066446 | 0.898035 | 1 SWAP70        | -      |
| ENSG00000176894 | 0.090666  | 4.354611 | 0.898093 | 1 PXMP2         | K13347 |
| ENSG00000260917 | 0.126018  | 2.055837 | 0.89815  | 1 RP11-57H14.4  | -      |
| ENSG00000153234 | 0.088474  | 4.004435 | 0.898213 | 1 NR4A2         | K08558 |
| ENSG00000131724 | 0.084449  | 7.454006 | 0.898224 | 1 IL13RA1       | K05076 |
| ENSG00000028310 | 0.085012  | 6.601745 | 0.898402 | 1 BRD9          | K11723 |
| ENSG00000119723 | -0.098545 | 3.544144 | 0.898416 | 1 COQ6          | K06126 |
| ENSG00000162062 | -0.090973 | 4.729252 | 0.898427 | 1 C16orf59      | -      |
| ENSG00000100053 | -0.280451 | 0.351706 | 0.898528 | 1 CRYBB3        | -      |
| ENSG00000136630 | -0.280451 | 0.351706 | 0.898528 | 1 HLX           | K09339 |
| ENSG00000163666 | -0.280451 | 0.351706 | 0.898528 | 1 HESX1         | K09354 |
| ENSG00000188897 | -0.280451 | 0.351706 | 0.898528 | 1 CTD-3088G3.8  | -      |
| ENSG00000232882 | -0.280451 | 0.351706 | 0.898528 | 1 PHKA1P1       | K07190 |
| ENSG00000266947 | -0.280451 | 0.351706 | 0.898528 | 1 RP11-799D4.4  | -      |
| ENSG00000268358 | -0.280451 | 0.351706 | 0.898528 | 1 EPB41L4A-AS2  | -      |
| ENSG00000162526 | 0.270897  | 0.340128 | 0.898528 | 1 TSSK3         | K08811 |
| ENSG00000187942 | 0.270897  | 0.340128 | 0.898528 | 1 LDLRAD2       | -      |
| ENSG00000233554 | 0.270897  | 0.340128 | 0.898528 | 1 RP11-326F20.5 | -      |
| ENSG00000253320 | 0.270897  | 0.340128 | 0.898528 | 1 KB-1507C5.2   | -      |
| ENSG00000152939 | 0.18922   | 0.380917 | 0.898528 | 1 MARVELD2      | K17291 |
| ENSG00000229980 | 0.18922   | 0.380917 | 0.898528 | 1 TOB1-AS1      | -      |
| ENSG00000198700 | 0.084337  | 7.235308 | 0.898533 | 1 IPO9          | -      |

|                 |           |          |          |               |        |
|-----------------|-----------|----------|----------|---------------|--------|
| ENSG00000081177 | 0.09962   | 3.714657 | 0.898551 | 1 EXD2        | K12606 |
| ENSG00000172059 | 0.090326  | 5.023746 | 0.898637 | 1 KLF11       | K09209 |
| ENSG00000078668 | -0.084931 | 6.614181 | 0.898681 | 1 VDAC3       | K15041 |
| ENSG00000170248 | -0.084553 | 6.910475 | 0.898747 | 1 PDCD6IP     | K12200 |
| ENSG00000120063 | -0.085356 | 5.894678 | 0.898768 | 1 GNA13       | K04639 |
| ENSG00000177830 | 0.08683   | 5.268752 | 0.898781 | 1 CHID1       | K17525 |
| ENSG00000183684 | -0.084609 | 6.812861 | 0.898798 | 1 ALYREF      | K12881 |
| ENSG00000186577 | 0.088499  | 2.848329 | 0.898828 | 1 C6orf1      | -      |
| ENSG00000117691 | -0.089134 | 5.526492 | 0.898909 | 1 NENF        | -      |
| ENSG00000145391 | 0.084869  | 6.360385 | 0.898923 | 1 SETD7       | K11431 |
| ENSG00000103852 | -0.104369 | 3.128989 | 0.898973 | 1 TTC23       | -      |
| ENSG00000011260 | -0.08425  | 7.028673 | 0.898977 | 1 UTP18       | K14553 |
| ENSG00000178802 | 0.085823  | 5.430087 | 0.899063 | 1 MPI         | K01809 |
| ENSG00000091640 | 0.085197  | 5.968957 | 0.899082 | 1 SPAG7       | -      |
| ENSG00000185658 | 0.084408  | 6.036683 | 0.899104 | 1 BRWD1       | K11798 |
| ENSG00000011566 | 0.086343  | 4.892544 | 0.899122 | 1 MAP4K3      | K04406 |
| ENSG00000176783 | -0.086329 | 5.621273 | 0.899124 | 1 RUFY1       | K12482 |
| ENSG00000139697 | 0.086207  | 6.102654 | 0.899249 | 1 SBNO1       | -      |
| ENSG00000182841 | 0.088747  | 4.147443 | 0.899296 | 1 RRP7B       | K14545 |
| ENSG00000007202 | 0.083582  | 7.400215 | 0.899312 | 1 KIAA0100    | -      |
| ENSG00000106789 | 0.090053  | 4.371669 | 0.899338 | 1 CORO2A      | K13887 |
| ENSG00000269190 | -0.089072 | 4.822056 | 0.899401 | 1 FBXO17      | K10101 |
| ENSG00000077713 | -0.088216 | 5.27914  | 0.899446 | 1 SLC25A43    | K15120 |
| ENSG00000128309 | 0.083705  | 6.924596 | 0.899594 | 1 MPST        | K01011 |
| ENSG00000150867 | -0.089199 | 4.748943 | 0.899708 | 1 PIP4K2A     | K00920 |
| ENSG00000073849 | -0.090815 | 4.575938 | 0.899725 | 1 ST6GAL1     | K00778 |
| ENSG00000198677 | -0.083613 | 7.004296 | 0.899773 | 1 TTC37       | K12600 |
| ENSG00000132768 | -0.08494  | 5.755544 | 0.899796 | 1 DPH2        | K17866 |
| ENSG00000089022 | -0.084424 | 5.491841 | 0.899842 | 1 MAPKAPK5    | K04442 |
| ENSG00000100221 | -0.083752 | 6.75762  | 0.899904 | 1 JOSD1       | K15235 |
| ENSG00000100162 | 0.08431   | 5.042519 | 0.899942 | 1 CENPM       | K11505 |
| ENSG00000118162 | -0.096151 | 2.871522 | 0.899976 | 1 KPTN        | -      |
| ENSG00000187908 | -0.162134 | 1.48225  | 0.900018 | 1 DMBT1       | K13912 |
| ENSG00000143450 | 0.105579  | 1.466637 | 0.900018 | 1 OAZ3        | K16614 |
| ENSG00000171403 | 0.105579  | 1.466637 | 0.900018 | 1 KRT9        | K07604 |
| ENSG00000188559 | -0.116198 | 2.54382  | 0.90003  | 1 RALGAPA2    | -      |
| ENSG00000124006 | -0.086638 | 5.396188 | 0.900065 | 1 OBSL1       | K19574 |
| ENSG00000111860 | -0.130733 | 2.108496 | 0.900079 | 1 CEP85L      | K16766 |
| ENSG00000119280 | -0.087306 | 4.486829 | 0.900113 | 1 C1orf198    | -      |
| ENSG00000188529 | -0.092135 | 4.387724 | 0.900151 | 1 SRSF10      | -      |
| ENSG00000115486 | 0.083898  | 6.32251  | 0.900154 | 1 GGCX        | K10106 |
| ENSG00000100632 | -0.082991 | 7.347588 | 0.900185 | 1 ERH         | -      |
| ENSG00000197299 | -0.087827 | 5.497674 | 0.90022  | 1 BLM         | K10901 |
| ENSG00000161036 | -0.086874 | 4.980413 | 0.900229 | 1 LRWD1       | -      |
| ENSG00000100220 | -0.083189 | 7.001222 | 0.900288 | 1 RTCB        | K14415 |
| ENSG00000167536 | 0.098503  | 3.741159 | 0.900458 | 1 DHRS13      | K11169 |
| ENSG00000198612 | -0.084745 | 5.918793 | 0.900479 | 1 COPS8       | K12181 |
| ENSG00000150054 | -0.084955 | 5.882097 | 0.900503 | 1 MPP7        | -      |
| ENSG00000125457 | -0.084081 | 4.913612 | 0.900542 | 1 MIF4GD      | -      |
| ENSG00000137273 | 0.083942  | 5.550117 | 0.900561 | 1 FOXF2       | K09399 |
| ENSG00000166848 | -0.084259 | 5.685719 | 0.900639 | 1 TERF2IP     | K11113 |
| ENSG00000110711 | 0.08645   | 5.64172  | 0.900671 | 1 AIP         | K17767 |
| ENSG00000152234 | 0.08171   | 9.214755 | 0.900786 | 1 ATP5A1      | K02132 |
| ENSG00000168264 | -0.08257  | 7.190791 | 0.900839 | 1 IRF2BP2     | -      |
| ENSG00000198492 | -0.082928 | 6.767314 | 0.900885 | 1 YTHDF2      | -      |
| ENSG00000176046 | 0.083578  | 6.063169 | 0.900905 | 1 NUPR1       | K15626 |
| ENSG00000115459 | 0.08612   | 3.905475 | 0.900932 | 1 ELMOD3      | -      |
| ENSG00000223764 | 0.086499  | 5.057083 | 0.900962 | 1 RP11-54O7.3 | -      |

|                 |           |          |          |                 |        |
|-----------------|-----------|----------|----------|-----------------|--------|
| ENSG00000160209 | 0.081698  | 8.444865 | 0.901022 | 1 PDXK          | K00868 |
| ENSG00000125482 | -0.088118 | 4.685612 | 0.901039 | 1 TTF1          | K15225 |
| ENSG00000100138 | -0.081898 | 7.932207 | 0.901086 | 1 NHP2L1        | K12845 |
| ENSG00000242294 | 0.111473  | 2.883788 | 0.901097 | 1 STAG3L5P      | K13055 |
| ENSG00000149929 | 0.087733  | 4.176856 | 0.901175 | 1 HIRIP3        | -      |
| ENSG00000140105 | 0.08155   | 8.278926 | 0.901265 | 1 WARS          | K01867 |
| ENSG00000188242 | -0.083595 | 5.652985 | 0.901344 | 1 CTD-2228K2.5  | -      |
| ENSG00000175387 | -0.082594 | 6.722769 | 0.901347 | 1 SMAD2         | K04500 |
| ENSG00000134330 | -0.096322 | 3.91639  | 0.901485 | 1 IAH1          | K17985 |
| ENSG00000140740 | -0.081743 | 7.580947 | 0.901505 | 1 UQCRC2        | K00415 |
| ENSG00000157593 | 0.082059  | 6.978465 | 0.901524 | 1 SLC35B2       | K15276 |
| ENSG00000136709 | 0.083474  | 5.9335   | 0.901588 | 1 WDR33         | K15542 |
| ENSG00000123297 | -0.082521 | 6.534144 | 0.901706 | 1 TSFM          | K02357 |
| ENSG00000251381 | 0.083706  | 5.365576 | 0.90173  | 1 LINC00958     | -      |
| ENSG00000116213 | -0.085893 | 4.410536 | 0.901738 | 1 WRAP73        | -      |
| ENSG00000188976 | -0.081372 | 7.899351 | 0.901741 | 1 NOC2L         | K14833 |
| ENSG00000163348 | 0.082804  | 6.17061  | 0.901759 | 1 PYGO2         | -      |
| ENSG00000112306 | -0.080872 | 9.55853  | 0.90176  | 1 RPS12         | K02951 |
| ENSG00000162928 | 0.082515  | 5.471217 | 0.901773 | 1 PEX13         | K13344 |
| ENSG00000011485 | -0.082506 | 6.500161 | 0.901776 | 1 PPP5C         | K04460 |
| ENSG00000046647 | 0.098466  | 3.164054 | 0.901785 | 1 GEMIN8        | K13136 |
| ENSG00000112367 | 0.092058  | 4.05542  | 0.901815 | 1 FIG4          | -      |
| ENSG00000106397 | -0.081894 | 7.024648 | 0.901826 | 1 PLOD3         | K13646 |
| ENSG00000143398 | 0.081541  | 7.191244 | 0.901949 | 1 PIP5K1A       | K00889 |
| ENSG00000198169 | -0.083881 | 5.475183 | 0.901961 | 1 ZNF251        | K09228 |
| ENSG00000154781 | -0.089652 | 3.924997 | 0.902032 | 1 CCDC174       | -      |
| ENSG00000174574 | 0.081588  | 6.92278  | 0.902151 | 1 AKIRIN1       | -      |
| ENSG00000162735 | 0.083998  | 5.663522 | 0.902172 | 1 PEX19         | K13337 |
| ENSG00000138592 | -0.082043 | 6.539811 | 0.902273 | 1 USP8          | K11839 |
| ENSG00000106003 | 0.090799  | 3.770491 | 0.902294 | 1 LFNG          | K05948 |
| ENSG00000087510 | 0.087737  | 4.313303 | 0.902318 | 1 TFAP2C        | K09177 |
| ENSG00000100104 | -0.088297 | 4.519698 | 0.902323 | 1 SRRD          | -      |
| ENSG00000103502 | -0.082163 | 5.982585 | 0.902337 | 1 CDIPT         | K00999 |
| ENSG00000100380 | 0.080475  | 8.77064  | 0.902394 | 1 ST13          | K09560 |
| ENSG00000114742 | -0.088851 | 4.789136 | 0.902478 | 1 WDR48         | K15361 |
| ENSG00000138092 | -0.08349  | 4.61757  | 0.902493 | 1 CENPO         | K11507 |
| ENSG00000145685 | 0.082329  | 5.266479 | 0.902549 | 1 LHFPL2        | -      |
| ENSG00000134317 | -0.092961 | 3.602976 | 0.90262  | 1 GRHL1         | K09275 |
| ENSG00000145216 | 0.081678  | 5.432122 | 0.902623 | 1 FIP1L1        | K14405 |
| ENSG00000139977 | -0.089567 | 4.707597 | 0.902643 | 1 NAA30         | K00670 |
| ENSG00000087301 | 0.107698  | 3.178456 | 0.902688 | 1 TXNDC16       | -      |
| ENSG00000115524 | 0.08029   | 8.423548 | 0.902734 | 1 SF3B1         | K12828 |
| ENSG00000079462 | -0.084254 | 5.272346 | 0.902763 | 1 PAFAH1B3      | K16795 |
| ENSG00000072195 | 0.083432  | 4.791623 | 0.902776 | 1 SPEG          | K08809 |
| ENSG00000138678 | -0.127264 | 2.581315 | 0.902788 | 1 AGPAT9        | K13506 |
| ENSG00000166262 | -0.127264 | 2.581315 | 0.902788 | 1 FAM227B       | -      |
| ENSG00000255857 | -0.127264 | 2.581315 | 0.902788 | 1 PXN-AS1       | -      |
| ENSG00000126106 | -0.112933 | 2.573496 | 0.902788 | 1 TMEM53        | K13194 |
| ENSG00000197147 | -0.112933 | 2.573496 | 0.902788 | 1 LRRC8B        | K09488 |
| ENSG00000104892 | 0.135663  | 1.511653 | 0.902795 | 1 KLC3          | K10407 |
| ENSG00000160117 | 0.135663  | 1.511653 | 0.902795 | 1 ANKLE1        | -      |
| ENSG00000247796 | -0.12294  | 1.526493 | 0.902795 | 1 CTD-2366F13.1 | -      |
| ENSG00000066697 | -0.087714 | 5.150514 | 0.9028   | 1 MSANTD3       | -      |
| ENSG00000197965 | 0.080704  | 7.298804 | 0.90287  | 1 MPZL1         | K06770 |
| ENSG00000138434 | 0.080426  | 7.602915 | 0.902981 | 1 SSFA2         | -      |
| ENSG00000075275 | 0.081374  | 6.405581 | 0.903066 | 1 CELSR1        | K04600 |
| ENSG00000134954 | 0.083236  | 4.797946 | 0.903072 | 1 ETS1          | K02678 |
| ENSG00000151466 | -0.089308 | 4.323463 | 0.903142 | 1 SCLT1         | -      |

|                 |           |          |          |                 |              |
|-----------------|-----------|----------|----------|-----------------|--------------|
| ENSG00000167775 | 0.0809    | 6.736202 | 0.903192 | 1 CD320         | K06734       |
| ENSG00000184840 | 0.080037  | 7.987518 | 0.903229 | 1 TMED9         | -            |
| ENSG00000107872 | -0.08212  | 5.157891 | 0.903263 | 1 FBXL15        | K10281       |
| ENSG00000175866 | -0.08212  | 5.157891 | 0.903263 | 1 BAIAP2        | K05627       |
| ENSG00000101365 | -0.080985 | 6.681515 | 0.903344 | 1 IDH3B         | K00030       |
| ENSG00000184743 | 0.081158  | 6.225578 | 0.903395 | 1 ATL3          | K17339       |
| ENSG00000170312 | -0.079823 | 8.080485 | 0.903515 | 1 CDK1          | K02087       |
| ENSG00000135250 | 0.08171   | 6.166337 | 0.903555 | 1 SRPK2         | K08831       |
| ENSG00000189171 | -0.082529 | 6.104825 | 0.903729 | 1 S100A13       | -            |
| ENSG00000079459 | -0.079851 | 7.66803  | 0.90373  | 1 FDFT1         | K00801       |
| ENSG00000006576 | -0.081867 | 6.002553 | 0.903765 | 1 PHTF2         | -            |
| ENSG00000108479 | 0.081355  | 6.003552 | 0.903765 | 1 GALK1         | K00849       |
| ENSG00000178999 | -0.080769 | 6.50934  | 0.903857 | 1 AURKB         | K11479       |
| ENSG00000104147 | -0.084275 | 5.399307 | 0.903909 | 1 OIP5          | K11565       |
| ENSG00000180198 | -0.080367 | 6.807409 | 0.903924 | 1 RCC1          | K11493       |
| ENSG00000163041 | -0.081297 | 5.16768  | 0.903949 | 1 H3F3A         | K11253       |
| ENSG00000116815 | -0.083361 | 5.228584 | 0.903992 | 1 CD58          | K06492       |
| ENSG00000218426 | 0.079727  | 7.313492 | 0.904038 | 1 RP11-475C16.1 | K02900       |
| ENSG00000001460 | -0.109803 | 2.602577 | 0.904111 | 1 STPG1         | -            |
| ENSG00000011422 | -0.080389 | 6.646938 | 0.904111 | 1 PLAUR         | K03985       |
| ENSG00000144935 | -0.248559 | 0.48187  | 0.904233 | 1 TRPC1         | K04964       |
| ENSG00000161103 | -0.248559 | 0.48187  | 0.904233 | 1 AC008132.13   | -            |
| ENSG00000175536 | -0.248559 | 0.48187  | 0.904233 | 1 LIPT2         | K03801       |
| ENSG00000203362 | -0.248559 | 0.48187  | 0.904233 | 1 RP3-337H4.8   | -            |
| ENSG00000231125 | -0.248559 | 0.48187  | 0.904233 | 1 AF129075.5    | -            |
| ENSG00000267249 | -0.248559 | 0.48187  | 0.904233 | 1 RP11-973H7.3  | -            |
| ENSG00000272168 | -0.248559 | 0.48187  | 0.904233 | 1 CASC15        | -            |
| ENSG00000225067 | -0.181966 | 0.444504 | 0.904233 | 1 RPL23AP2      | K02893       |
| ENSG00000237758 | -0.181966 | 0.444504 | 0.904233 | 1 BANF1P3       | -            |
| ENSG00000250397 | -0.181966 | 0.444504 | 0.904233 | 1 RP11-1391J7.1 | -            |
| ENSG00000259972 | -0.181966 | 0.444504 | 0.904233 | 1 AC009120.6    | -            |
| ENSG00000272578 | -0.181966 | 0.444504 | 0.904233 | 1 AP000347.2    | K01195       |
| ENSG00000196781 | -0.090666 | 4.096271 | 0.904236 | 1 TLE1          | -            |
| ENSG00000039523 | 0.080842  | 5.973843 | 0.904256 | 1 FAM65A        | -            |
| ENSG00000070540 | 0.086131  | 4.224583 | 0.9043   | 1 WIPI1         | K17908       |
| ENSG00000159147 | -0.080484 | 6.441352 | 0.904308 | 1 DONSON        | K11876       |
| ENSG00000105419 | 0.08242   | 4.341749 | 0.904353 | 1 MEIS3         | K16671       |
| ENSG00000183527 | 0.079318  | 7.49347  | 0.904397 | 1 PSMG1         | K11875       |
| ENSG00000183671 | 0.096867  | 3.202713 | 0.904445 | 1 GPR1          | K04310       |
| ENSG00000163811 | -0.079711 | 7.034723 | 0.904452 | 1 WDR43         | K14546       |
| ENSG00000164402 | -0.086083 | 4.820494 | 0.904528 | 1               | 8-Sep K16939 |
| ENSG00000183624 | 0.081929  | 6.117254 | 0.904556 | 1 HMCES         | -            |
| ENSG00000243943 | 0.083758  | 4.972981 | 0.904573 | 1 ZNF512        | -            |
| ENSG00000143553 | 0.081385  | 5.298046 | 0.904653 | 1 SNAPIN        | -            |
| ENSG00000173818 | 0.08426   | 3.962888 | 0.904677 | 1 ENDOV         | -            |
| ENSG00000170619 | -0.080738 | 5.465293 | 0.904688 | 1 COMMD5        | -            |
| ENSG00000123473 | 0.082445  | 5.657449 | 0.904723 | 1 STIL          | K16724       |
| ENSG00000087586 | -0.07912  | 7.480702 | 0.904753 | 1 AURKA         | K11481       |
| ENSG00000148634 | -0.079033 | 7.619146 | 0.904754 | 1 HERC4         | K10615       |
| ENSG00000169826 | -0.088579 | 4.559287 | 0.904781 | 1 CSGALNACT2    | K00746       |
| ENSG00000154845 | -0.080138 | 6.383192 | 0.904822 | 1 PPP4R1        | K15424       |
| ENSG00000108055 | 0.078675  | 7.922632 | 0.904911 | 1 SMC3          | K06669       |
| ENSG00000125952 | -0.081787 | 5.24717  | 0.905067 | 1 MAX           | K04453       |
| ENSG00000146282 | -0.082666 | 5.121834 | 0.905076 | 1 RARS2         | K01887       |
| ENSG00000105058 | 0.079682  | 6.392058 | 0.905127 | 1 FAM32A        | K13120       |
| ENSG00000214135 | 0.089638  | 3.971243 | 0.905189 | 1 AC024560.3    | K00234       |
| ENSG00000145979 | -0.085617 | 3.970411 | 0.905189 | 1 TBC1D7        | -            |
| ENSG00000115317 | 0.080475  | 5.665249 | 0.905203 | 1 HTRA2         | K08669       |



|                 |           |          |          |                  |        |
|-----------------|-----------|----------|----------|------------------|--------|
| ENSG00000099812 | -0.078747 | 7.467141 | 0.905215 | 1 MISP           | -      |
| ENSG00000225855 | 0.0877    | 3.447674 | 0.905264 | 1 RUSC1-AS1      | -      |
| ENSG00000081791 | 0.078389  | 6.060531 | 0.905268 | 1 KIAA0141       | -      |
| ENSG00000149480 | -0.078998 | 7.075602 | 0.90527  | 1 MTA2           | K11660 |
| ENSG00000151729 | 0.07945   | 6.472319 | 0.905289 | 1 SLC25A4        | K05863 |
| ENSG00000129235 | 0.079665  | 5.915435 | 0.9053   | 1 TXNDC17        | -      |
| ENSG00000089053 | -0.079028 | 6.993347 | 0.905321 | 1 ANAPC5         | K03352 |
| ENSG00000177034 | -0.111758 | 2.953472 | 0.905344 | 1 MTX3           | K17776 |
| ENSG00000215375 | -0.111758 | 2.953472 | 0.905344 | 1 MYL5           | K12753 |
| ENSG00000130638 | -0.078589 | 7.522793 | 0.905362 | 1 ATXN10         | K19323 |
| ENSG00000113719 | 0.078041  | 8.655991 | 0.905377 | 1 ERGIC1         | -      |
| ENSG00000243725 | 0.097601  | 2.610272 | 0.905398 | 1 TTC4           | K01881 |
| ENSG00000100490 | 0.163812  | 1.55538  | 0.905421 | 1 CDKL1          | K08824 |
| ENSG00000253982 | 0.131512  | 1.572019 | 0.905421 | 1 CTD-2336O2.1   | -      |
| ENSG00000163681 | 0.078543  | 5.955575 | 0.905421 | 1 SLMAP          | -      |
| ENSG00000113163 | -0.086624 | 4.663287 | 0.905431 | 1 COL4A3BP       | K08283 |
| ENSG00000136492 | -0.086624 | 4.663287 | 0.905431 | 1 BRIP1          | K15362 |
| ENSG00000234449 | -0.121312 | 2.187322 | 0.90545  | 1 RP11-706O15.3  | -      |
| ENSG00000246582 | 0.098353  | 2.187874 | 0.90545  | 1 RP11-1149O23.3 | -      |
| ENSG00000214485 | 0.077896  | 8.813283 | 0.905505 | 1 RPL7P1         | K02937 |
| ENSG00000189180 | 0.079207  | 5.12656  | 0.905538 | 1 ZNF33A         | K09228 |
| ENSG00000135823 | -0.079336 | 5.529344 | 0.905576 | 1 STX6           | K08498 |
| ENSG00000002834 | -0.077953 | 8.467038 | 0.905601 | 1 LASP1          | K15494 |
| ENSG00000059122 | -0.078403 | 5.960233 | 0.90568  | 1 FLYWCH1        | -      |
| ENSG00000122970 | 0.087511  | 4.665898 | 0.905747 | 1 IFT81          | K19677 |
| ENSG00000175874 | -0.079404 | 5.130614 | 0.905767 | 1 CREG2          | K05750 |
| ENSG00000163510 | -0.082498 | 5.062721 | 0.905804 | 1 CWC22          | K13100 |
| ENSG00000149716 | 0.088189  | 3.653395 | 0.905866 | 1 ORAOV1         | K10408 |
| ENSG00000116489 | -0.077683 | 8.160818 | 0.906064 | 1 CAPZA1         | K10364 |
| ENSG00000157916 | -0.078502 | 6.885875 | 0.90608  | 1 RER1           | -      |
| ENSG00000180758 | -0.087933 | 4.126681 | 0.906089 | 1 GPR157         | K08467 |
| ENSG00000204160 | -0.08067  | 4.372906 | 0.906305 | 1 ZDHHC18        | K16675 |
| ENSG00000130856 | -0.098501 | 2.970022 | 0.90635  | 1 ZNF236         | -      |
| ENSG00000174951 | -0.098501 | 2.970022 | 0.90635  | 1 FUT1           | K00718 |
| ENSG00000266173 | -0.098501 | 2.970022 | 0.90635  | 1 STRADA         | K08271 |
| ENSG00000075826 | 0.084565  | 2.965353 | 0.90635  | 1 SEC31B         | K14005 |
| ENSG00000132612 | -0.079238 | 6.113723 | 0.906429 | 1 VPS4A          | K12196 |
| ENSG00000111011 | -0.078569 | 6.536048 | 0.90647  | 1 RSRC2          | -      |
| ENSG00000136235 | 0.09483   | 3.663717 | 0.906489 | 1 GPNMB          | K02927 |
| ENSG00000221909 | 0.09483   | 3.663717 | 0.906489 | 1 FAM200A        | K09229 |
| ENSG00000083223 | -0.084126 | 5.074482 | 0.906517 | 1 ZCCHC6         | K13291 |
| ENSG00000169359 | -0.079876 | 5.270071 | 0.906533 | 1 SLC33A1        | K03372 |
| ENSG00000107021 | -0.08118  | 5.078374 | 0.906752 | 1 TBC1D13        | -      |
| ENSG00000116754 | -0.076883 | 8.822166 | 0.906773 | 1 SRSF11         | K12899 |
| ENSG00000107949 | -0.077943 | 6.846419 | 0.906803 | 1 BCCIP          | K15262 |
| ENSG00000101189 | 0.078958  | 5.777478 | 0.906808 | 1 MRGBP          | K11343 |
| ENSG00000111364 | -0.079721 | 5.978424 | 0.906829 | 1 DDX55          | K14809 |
| ENSG00000116237 | -0.078196 | 6.597551 | 0.906829 | 1 ICMT           | K00587 |
| ENSG00000129353 | 0.077941  | 6.661015 | 0.906856 | 1 SLC44A2        | K15377 |
| ENSG00000125970 | 0.07751   | 7.115419 | 0.906888 | 1 RALY           | K12895 |
| ENSG00000095787 | 0.077107  | 7.769188 | 0.906894 | 1 WAC            | -      |
| ENSG00000127554 | -0.082954 | 5.148035 | 0.906896 | 1 GFER           | K17783 |
| ENSG00000090339 | -0.077773 | 6.903928 | 0.906939 | 1 ICAM1          | K06490 |
| ENSG00000165714 | -0.102109 | 3.249111 | 0.906965 | 1 LOH12CR1       | -      |
| ENSG00000183506 | -0.102109 | 3.249111 | 0.906965 | 1 PI4KAP2        | K00888 |
| ENSG00000150165 | 0.085777  | 3.245196 | 0.906965 | 1 ANXA8L1        | K17096 |
| ENSG00000119403 | 0.078139  | 5.863632 | 0.906981 | 1 PHF19          | K11486 |
| ENSG00000051382 | -0.078602 | 5.392015 | 0.906984 | 1 PIK3CB         | K00922 |

|                 |           |          |          |                |        |
|-----------------|-----------|----------|----------|----------------|--------|
| ENSG00000151779 | 0.081144  | 4.384393 | 0.907064 | 1 NBAS         | -      |
| ENSG00000234608 | 0.081144  | 4.384393 | 0.907064 | 1 MAPKAPK5-AS1 | -      |
| ENSG00000124145 | -0.077682 | 6.868349 | 0.907092 | 1 SDC4         | K16338 |
| ENSG00000148719 | 0.0812    | 5.448289 | 0.907092 | 1 DNAJB12      | K09518 |
| ENSG00000124702 | 0.077376  | 7.047728 | 0.907113 | 1 KLHDC3       | -      |
| ENSG00000112357 | -0.116984 | 2.225185 | 0.907115 | 1 PEX7         | K13341 |
| ENSG00000163453 | 0.077794  | 6.532318 | 0.907202 | 1 IGFBP7       | -      |
| ENSG00000174307 | -0.078452 | 6.092038 | 0.907282 | 1 PHLDA3       | -      |
| ENSG00000159592 | 0.077229  | 6.976704 | 0.907361 | 1 GPBP1L1      | -      |
| ENSG00000177150 | 0.081785  | 5.284602 | 0.907553 | 1 FAM210A      | -      |
| ENSG00000185127 | -0.080395 | 4.695762 | 0.907596 | 1 C6orf120     | -      |
| ENSG00000187605 | 0.085628  | 4.501325 | 0.907614 | 1 TET3         | -      |
| ENSG00000127418 | 0.077692  | 5.703635 | 0.907681 | 1 FGFRL1       | -      |
| ENSG00000165282 | 0.081743  | 4.946198 | 0.907703 | 1 PIGO         | K05288 |
| ENSG00000104872 | 0.077243  | 6.621457 | 0.907749 | 1 PIH1D1       | -      |
| ENSG00000126858 | 0.078517  | 5.793386 | 0.90781  | 1 RHOT1        | K07870 |
| ENSG00000092964 | -0.080491 | 5.022818 | 0.907812 | 1 DPYSL2       | K07528 |
| ENSG00000124508 | 0.109776  | 2.659299 | 0.907871 | 1 BTN2A2       | K06712 |
| ENSG00000262454 | -0.145039 | 1.602006 | 0.907908 | 1 RP11-65J21.3 | -      |
| ENSG00000009844 | -0.079684 | 5.995703 | 0.90795  | 1 VTA1         | K12199 |
| ENSG00000127922 | 0.077128  | 6.485101 | 0.908071 | 1 SHFM1        | K10881 |
| ENSG00000105227 | -0.095526 | 3.494382 | 0.908084 | 1 PRX          | -      |
| ENSG00000135116 | -0.095526 | 3.494382 | 0.908084 | 1 HRK          | -      |
| ENSG00000136710 | -0.095526 | 3.494382 | 0.908084 | 1 CCDC115      | K14561 |
| ENSG00000136098 | -0.087959 | 3.490356 | 0.908084 | 1 NEK3         | K08857 |
| ENSG00000187189 | -0.087959 | 3.490356 | 0.908084 | 1 TSPYL4       | K11287 |
| ENSG00000101474 | -0.077412 | 6.104837 | 0.908086 | 1 APMAP        | -      |
| ENSG00000101224 | 0.076232  | 7.536625 | 0.908099 | 1 CDC25B       | K05866 |
| ENSG00000100034 | 0.07803   | 5.92196  | 0.908106 | 1 PPM1F        | -      |
| ENSG00000166133 | -0.081394 | 4.87528  | 0.908117 | 1 RPUSD2       | -      |
| ENSG00000107679 | -0.077883 | 6.034346 | 0.908117 | 1 PLEKHA1      | K17985 |
| ENSG00000084774 | 0.076952  | 6.598551 | 0.908131 | 1 CAD          | K11540 |
| ENSG00000068383 | 0.082542  | 4.018101 | 0.908149 | 1 INPP5A       | K01106 |
| ENSG00000134590 | 0.078102  | 6.071009 | 0.90816  | 1 FAM127A      | -      |
| ENSG00000178035 | -0.076288 | 7.491476 | 0.90817  | 1 IMPDH2       | K00088 |
| ENSG00000010803 | -0.086617 | 4.402272 | 0.90818  | 1 SCMHI        | K11461 |
| ENSG00000080371 | -0.077573 | 5.843691 | 0.908279 | 1 RAB21        | K07890 |
| ENSG00000158716 | 0.079602  | 5.57057  | 0.908282 | 1 DUSP23       | K14165 |
| ENSG00000136950 | 0.076742  | 6.673529 | 0.908288 | 1 ARPC5L       | K05754 |
| ENSG00000041880 | 0.093765  | 3.691161 | 0.908311 | 1 PARP3        | K10798 |
| ENSG00000144224 | -0.076874 | 6.66866  | 0.908324 | 1 UBXLN4       | -      |
| ENSG00000159596 | -0.077297 | 6.325879 | 0.908345 | 1 TMEM69       | K03327 |
| ENSG00000057935 | -0.076592 | 5.965157 | 0.908403 | 1 MTA3         | K11660 |
| ENSG00000171206 | -0.077326 | 5.846742 | 0.908415 | 1 TRIM8        | K12001 |
| ENSG00000130332 | -0.077546 | 6.209847 | 0.908416 | 1 LSM7         | K12626 |
| ENSG00000124641 | 0.084636  | 4.407291 | 0.908546 | 1 MED20        | K13528 |
| ENSG00000168924 | 0.078901  | 6.042008 | 0.908593 | 1 LETM1        | K17800 |
| ENSG00000188026 | -0.080917 | 4.025244 | 0.908625 | 1 RILPL1       | -      |
| ENSG00000141934 | -0.076192 | 7.110296 | 0.908625 | 1 PPAP2C       | K01080 |
| ENSG00000040531 | -0.084605 | 4.517763 | 0.908639 | 1 CTNS         | K12386 |
| ENSG00000125534 | -0.076079 | 7.07951  | 0.908793 | 1 PDPF         | -      |
| ENSG00000196290 | -0.07908  | 5.307083 | 0.908943 | 1 NIF3L1       | -      |
| ENSG00000123191 | -0.088178 | 3.875055 | 0.90901  | 1 ATP7B        | K17686 |
| ENSG00000129534 | -0.078609 | 5.974945 | 0.909024 | 1 MIS18BP1     | -      |
| ENSG00000139410 | -0.101142 | 2.686476 | 0.90906  | 1 SDSL         | K17989 |
| ENSG00000147408 | -0.078051 | 5.85661  | 0.909088 | 1 CSGALNACT1   | -      |
| ENSG00000101246 | 0.079841  | 4.805823 | 0.909128 | 1 ARFRP1       | K07952 |
| ENSG00000187145 | -0.076595 | 6.348115 | 0.909154 | 1 MRPS21       | K02970 |

|                 |           |          |          |                 |        |
|-----------------|-----------|----------|----------|-----------------|--------|
| ENSG00000130165 | 0.075691  | 5.427034 | 0.909192 | 1 ELOF1         | -      |
| ENSG00000184465 | 0.079221  | 4.300069 | 0.909221 | 1 WDR27         | -      |
| ENSG00000167981 | -0.094274 | 3.014014 | 0.909242 | 1 ZNF597        | K09228 |
| ENSG00000170456 | -0.077654 | 6.053615 | 0.909297 | 1 DENND5B       | -      |
| ENSG00000164300 | 0.174991  | 0.509994 | 0.909315 | 1 SERINC5       | -      |
| ENSG00000185189 | 0.174991  | 0.509994 | 0.909315 | 1 NRBP2         | K08875 |
| ENSG00000238273 | 0.174991  | 0.509994 | 0.909315 | 1 AC012360.6    | -      |
| ENSG00000267309 | 0.174991  | 0.509994 | 0.909315 | 1 CTD-2630F21.1 | -      |
| ENSG00000126562 | -0.161511 | 0.567163 | 0.909315 | 1 WNK4          | K08867 |
| ENSG00000147576 | -0.161511 | 0.567163 | 0.909315 | 1 ADHFE1        | K11173 |
| ENSG00000163467 | -0.161511 | 0.567163 | 0.909315 | 1 TSACC         | K06580 |
| ENSG00000165609 | 0.075365  | 7.289274 | 0.909332 | 1 NUDT5         | K13987 |
| ENSG00000115825 | 0.075363  | 7.197805 | 0.909411 | 1 PRKD3         | K06070 |
| ENSG00000247556 | 0.075104  | 7.524995 | 0.909472 | 1 OIP5-AS1      | -      |
| ENSG00000157637 | -0.075664 | 6.911968 | 0.909479 | 1 SLC38A10      | K14996 |
| ENSG00000167325 | 0.07462   | 8.425303 | 0.909599 | 1 RRM1          | K10807 |
| ENSG00000249915 | 0.074633  | 8.350797 | 0.909611 | 1 PDCD6         | -      |
| ENSG00000119915 | 0.084113  | 4.423741 | 0.909626 | 1 ELOVL3        | K10248 |
| ENSG00000110841 | -0.075387 | 6.130099 | 0.909654 | 1 PPFIBP1       | -      |
| ENSG00000130764 | 0.078057  | 5.866643 | 0.909752 | 1 LRRC47        | K04613 |
| ENSG00000157456 | -0.075124 | 7.253078 | 0.909779 | 1 CCNB2         | K05868 |
| ENSG00000172531 | -0.075086 | 7.303626 | 0.90978  | 1 PPP1CA        | K06269 |
| ENSG00000089876 | -0.076069 | 6.327521 | 0.909824 | 1 DHX32         | K18994 |
| ENSG00000143373 | 0.077518  | 5.646101 | 0.909894 | 1 ZNF687        | -      |
| ENSG00000074319 | 0.076526  | 5.546365 | 0.909899 | 1 TSG101        | K12183 |
| ENSG00000135976 | 0.085091  | 3.525963 | 0.910091 | 1 ANKRD36       | K17299 |
| ENSG00000178026 | 0.094217  | 2.694072 | 0.910218 | 1 FAM211B       | -      |
| ENSG00000172780 | -0.137539 | 1.658374 | 0.910267 | 1 RAB43         | K07930 |
| ENSG00000173535 | 0.127703  | 1.629955 | 0.910267 | 1 TNFRSF10C     | K04722 |
| ENSG00000144730 | -0.109615 | 1.642889 | 0.910267 | 1 IL17RD        | K05167 |
| ENSG00000204519 | 0.097436  | 1.645686 | 0.910267 | 1 ZNF551        | K09228 |
| ENSG00000261342 | 0.097436  | 1.645686 | 0.910267 | 1 AC006538.1    | -      |
| ENSG00000163322 | 0.095249  | 2.262976 | 0.910273 | 1 FAM175A       | K04613 |
| ENSG00000234311 | 0.095249  | 2.262976 | 0.910273 | 1 RP11-432J24.3 | -      |
| ENSG00000108799 | 0.080548  | 4.54147  | 0.910297 | 1 EZH1          | K17451 |
| ENSG00000175582 | 0.074674  | 7.02263  | 0.910404 | 1 RAB6A         | K07893 |
| ENSG00000138180 | 0.074506  | 7.232056 | 0.910419 | 1 CEP55         | K16456 |
| ENSG00000106554 | 0.073898  | 8.534866 | 0.910435 | 1 CHCHD3        | K17563 |
| ENSG00000138398 | 0.076636  | 5.919785 | 0.910517 | 1 PPIG          | K09566 |
| ENSG00000133835 | -0.075136 | 6.5903   | 0.910533 | 1 HSD17B4       | K12405 |
| ENSG00000187109 | -0.073532 | 9.497598 | 0.910667 | 1 NAP1L1        | K11279 |
| ENSG00000100036 | -0.086569 | 3.316378 | 0.910882 | 1 SLC35E4       | K15286 |
| ENSG00000127586 | -0.074827 | 6.315464 | 0.911028 | 1 CHTF18        | K11269 |
| ENSG00000104228 | -0.085059 | 3.910437 | 0.911049 | 1 TRIM35        | K12012 |
| ENSG00000077684 | -0.076859 | 5.713562 | 0.911063 | 1 JADE1         | K11347 |
| ENSG00000181666 | 0.092797  | 3.047017 | 0.911073 | 1 HKR1          | K09228 |
| ENSG00000112159 | -0.07875  | 5.513116 | 0.911078 | 1 MDN1          | K14572 |
| ENSG00000073050 | 0.078192  | 4.749862 | 0.911087 | 1 XRCC1         | K10803 |
| ENSG00000182158 | 0.074287  | 6.596276 | 0.911352 | 1 CREB3L2       | K09048 |
| ENSG00000161791 | 0.084602  | 3.541123 | 0.911381 | 1 FMNL3         | -      |
| ENSG00000149212 | 0.076873  | 3.545014 | 0.911381 | 1 SESN3         | K10141 |
| ENSG00000128908 | 0.074775  | 5.463284 | 0.911469 | 1 INO80         | K11665 |
| ENSG00000136935 | 0.079025  | 4.458111 | 0.911712 | 1 GOLGA1        | -      |
| ENSG00000104522 | -0.073995 | 6.683248 | 0.911781 | 1 TSTA3         | K02377 |
| ENSG00000177697 | 0.073077  | 7.626825 | 0.911859 | 1 CD151         | K06537 |
| ENSG00000054967 | 0.078004  | 4.343944 | 0.911865 | 1 RELT          | K05156 |
| ENSG00000114302 | 0.073253  | 5.525562 | 0.9119   | 1 PRKAR2A       | K04739 |
| ENSG00000148153 | -0.078791 | 4.673593 | 0.912055 | 1 INIP          | K17985 |

|                 |           |          |          |                 |        |
|-----------------|-----------|----------|----------|-----------------|--------|
| ENSG00000104626 | -0.076929 | 5.360347 | 0.912153 | 1 ERI1          | K18416 |
| ENSG00000177700 | -0.074135 | 6.324247 | 0.912163 | 1 POLR2L        | K03007 |
| ENSG00000145996 | -0.077953 | 4.353715 | 0.91223  | 1 CDKAL1        | K15865 |
| ENSG00000103152 | 0.07546   | 5.908872 | 0.912314 | 1 MPG           | K03652 |
| ENSG00000159069 | 0.0732    | 6.879061 | 0.912332 | 1 FBXW5         | K10263 |
| ENSG00000079277 | -0.078229 | 4.680446 | 0.912346 | 1 MKNK1         | K04372 |
| ENSG00000132793 | 0.082911  | 3.334922 | 0.912358 | 1 LPIN3         | K15728 |
| ENSG00000157500 | -0.076334 | 5.78129  | 0.912405 | 1 APPL1         | K08733 |
| ENSG00000176853 | -0.073594 | 6.551104 | 0.912452 | 1 FAM91A1       | -      |
| ENSG00000183458 | 0.124194  | 1.685649 | 0.912508 | 1 RP11-958N24.1 | K04985 |
| ENSG00000259583 | 0.124194  | 1.685649 | 0.912508 | 1 RP11-66B24.4  | -      |
| ENSG00000247137 | -0.103744 | 1.697763 | 0.912508 | 1 RP11-727A23.5 | -      |
| ENSG00000185716 | -0.088619 | 3.936485 | 0.912518 | 1 C16orf52      | -      |
| ENSG00000166847 | -0.077899 | 5.426063 | 0.912585 | 1 DCTN5         | K10427 |
| ENSG00000198853 | -0.076942 | 5.305974 | 0.912629 | 1 RUSC2         | -      |
| ENSG00000139687 | -0.0738   | 6.035023 | 0.912694 | 1 RB1           | K06618 |
| ENSG00000137154 | 0.071693  | 10.80038 | 0.912723 | 1 RPS6          | K02991 |
| ENSG00000101639 | 0.079338  | 5.029157 | 0.912746 | 1 CEP192        | K16725 |
| ENSG00000273015 | -0.088399 | 3.077594 | 0.912832 | 1 LINC00938     | -      |
| ENSG00000012048 | -0.072522 | 6.182354 | 0.91284  | 1 BRCA1         | K10605 |
| ENSG00000176022 | 0.077538  | 4.361126 | 0.912952 | 1 B3GALT6       | K00734 |
| ENSG00000126267 | 0.072321  | 7.275168 | 0.913026 | 1 COX6B1        | K02267 |
| ENSG00000105819 | -0.073013 | 6.617352 | 0.913059 | 1 PMPCB         | K17732 |
| ENSG00000138111 | 0.091248  | 3.347743 | 0.913078 | 1 TMEM180       | K04613 |
| ENSG00000264364 | -0.073175 | 6.043025 | 0.913146 | 1 DYNLL2        | K10418 |
| ENSG00000164151 | 0.071888  | 7.581042 | 0.913329 | 1 KIAA0947      | -      |
| ENSG00000122126 | -0.07507  | 5.797147 | 0.913345 | 1 OCRL          | K01099 |
| ENSG00000102974 | -0.073756 | 5.31811  | 0.913375 | 1 CTCF          | -      |
| ENSG00000112685 | -0.073301 | 5.799513 | 0.913478 | 1 EXOC2         | K17637 |
| ENSG00000111737 | 0.073434  | 6.047313 | 0.913482 | 1 RAB35         | K07876 |
| ENSG00000259758 | 0.072562  | 6.512255 | 0.913546 | 1 CASC7         | -      |
| ENSG00000142684 | 0.09123   | 3.088893 | 0.913685 | 1 ZNF593        | K14821 |
| ENSG00000172889 | -0.07329  | 6.09205  | 0.913826 | 1 EGFL7         | -      |
| ENSG00000146592 | 0.229817  | 0.594615 | 0.913871 | 1 CREB5         | K09047 |
| ENSG00000171962 | 0.229817  | 0.594615 | 0.913871 | 1 LRRC48        | -      |
| ENSG00000196331 | 0.229817  | 0.594615 | 0.913871 | 1 HIST1H2BO     | K11252 |
| ENSG00000198225 | 0.229817  | 0.594615 | 0.913871 | 1 FKBP1C        | K09568 |
| ENSG00000230590 | 0.229817  | 0.594615 | 0.913871 | 1 FTX           | -      |
| ENSG00000173212 | 0.163224  | 0.628449 | 0.913871 | 1 MAB21L3       | -      |
| ENSG00000269947 | 0.163224  | 0.628449 | 0.913871 | 1 RP11-849F2.9  | -      |
| ENSG00000164117 | -0.086602 | 3.959191 | 0.913941 | 1 FBXO8         | K10294 |
| ENSG00000173153 | -0.073767 | 6.018211 | 0.914032 | 1 ESRRA         | K08552 |
| ENSG00000235552 | 0.071222  | 7.669245 | 0.914079 | 1 RPL6P27       | K02934 |
| ENSG00000127399 | 0.075374  | 4.971606 | 0.91408  | 1 LRRC61        | -      |
| ENSG00000130921 | 0.07453   | 5.390896 | 0.914112 | 1 C12orf65      | -      |
| ENSG00000072778 | -0.07085  | 8.277914 | 0.914287 | 1 ACADVL        | K09479 |
| ENSG00000120963 | -0.071693 | 6.877724 | 0.91432  | 1 ZNF706        | -      |
| ENSG00000114316 | 0.076858  | 4.386522 | 0.91436  | 1 USP4          | K11835 |
| ENSG00000169976 | 0.072206  | 6.099427 | 0.914362 | 1 SF3B5         | K12832 |
| ENSG00000132613 | -0.076564 | 4.260704 | 0.914372 | 1 MTSS1L        | -      |
| ENSG00000119977 | -0.07391  | 5.398263 | 0.914459 | 1 TCTN3         | K19382 |
| ENSG00000004660 | 0.073233  | 5.05843  | 0.914525 | 1 CAMKK1        | K07359 |
| ENSG00000184384 | -0.106017 | 2.772582 | 0.914571 | 1 MAML2         | K06061 |
| ENSG00000233493 | -0.105299 | 2.333186 | 0.914627 | 1 TMEM238       | -      |
| ENSG00000239415 | -0.105299 | 2.333186 | 0.914627 | 1 AP001469.9    | -      |
| ENSG00000175701 | 0.092453  | 2.334356 | 0.914627 | 1 LINC00116     | -      |
| ENSG00000231742 | -0.157018 | 1.727338 | 0.914639 | 1 RP11-112L6.4  | -      |
| ENSG00000247240 | -0.157018 | 1.727338 | 0.914639 | 1 UBL7-AS1      | -      |

|                 |           |          |          |                  |        |
|-----------------|-----------|----------|----------|------------------|--------|
| ENSG00000169057 | -0.130627 | 1.712637 | 0.914639 | 1 MECP2          | K11588 |
| ENSG00000178184 | -0.130627 | 1.712637 | 0.914639 | 1 PARD6G         | K06093 |
| ENSG00000097033 | -0.071113 | 7.191143 | 0.91469  | 1 SH3GLB1        | K11248 |
| ENSG00000139624 | 0.07155   | 5.676438 | 0.914701 | 1 CERS5          | K04710 |
| ENSG00000155368 | -0.070992 | 7.18483  | 0.914843 | 1 DBI            | K08762 |
| ENSG00000131845 | 0.078196  | 3.976954 | 0.914863 | 1 ZNF304         | K09228 |
| ENSG00000171469 | -0.074967 | 4.720893 | 0.914882 | 1 ZNF561         | K09228 |
| ENSG00000125149 | 0.083401  | 3.799233 | 0.914941 | 1 C16orf70       | -      |
| ENSG00000149308 | 0.077518  | 4.51295  | 0.914984 | 1 NPAT           | -      |
| ENSG00000134905 | 0.071002  | 6.877187 | 0.914992 | 1 CARS2          | K01883 |
| ENSG00000134030 | -0.072136 | 4.990062 | 0.914999 | 1 CTIF           | -      |
| ENSG00000070831 | -0.070872 | 7.154379 | 0.915017 | 1 CDC42          | K04393 |
| ENSG00000267194 | -0.084688 | 3.613633 | 0.915039 | 1 RP1-193H18.2   | -      |
| ENSG00000130724 | -0.071386 | 6.603448 | 0.915045 | 1 CHMP2A         | K12191 |
| ENSG00000163913 | -0.078583 | 4.398063 | 0.915047 | 1 IFT122         | K19656 |
| ENSG00000160703 | 0.079988  | 4.273089 | 0.915121 | 1 NLRX1          | K12653 |
| ENSG00000025796 | 0.070443  | 7.429968 | 0.915182 | 1 SEC63          | K09540 |
| ENSG00000128881 | 0.07408   | 4.135151 | 0.91521  | 1 TTBK2          | K08815 |
| ENSG00000228223 | 0.074814  | 4.993807 | 0.915226 | 1 HCG11          | -      |
| ENSG00000162408 | 0.077312  | 4.520617 | 0.915298 | 1 NOL9           | K06947 |
| ENSG00000131323 | 0.075369  | 4.731826 | 0.915426 | 1 TRAF3          | K03174 |
| ENSG00000122643 | -0.07117  | 5.962357 | 0.915435 | 1 NT5C3A         | K01081 |
| ENSG00000157693 | -0.079481 | 4.281167 | 0.915491 | 1 C9orf91        | -      |
| ENSG00000075239 | -0.070224 | 7.408009 | 0.915577 | 1 ACAT1          | K00626 |
| ENSG00000174327 | -0.091052 | 2.791284 | 0.915594 | 1 SLC16A13       | K08189 |
| ENSG00000103550 | -0.076561 | 4.141555 | 0.915615 | 1 KNOP1          | -      |
| ENSG00000225733 | -0.07275  | 6.194976 | 0.915652 | 1 FGD5-AS1       | -      |
| ENSG00000165934 | -0.071594 | 6.19438  | 0.915652 | 1 CPSF2          | K14402 |
| ENSG00000124535 | -0.070524 | 6.912354 | 0.915692 | 1 WRNIP1         | K07478 |
| ENSG00000164105 | -0.077106 | 4.735788 | 0.915695 | 1 SAP30          | K19202 |
| ENSG00000126062 | 0.070996  | 5.155173 | 0.915734 | 1 TMEM115        | -      |
| ENSG00000105202 | 0.069716  | 7.968495 | 0.915739 | 1 FBL            | K14563 |
| ENSG00000115966 | -0.07191  | 4.91938  | 0.915761 | 1 ATF2           | K04450 |
| ENSG00000141367 | 0.069402  | 8.941282 | 0.915767 | 1 CLTC           | K04646 |
| ENSG00000129197 | -0.072495 | 5.591584 | 0.915792 | 1 RPAIN          | -      |
| ENSG00000217555 | 0.077883  | 4.636263 | 0.915799 | 1 CKLF           | -      |
| ENSG00000240342 | -0.069454 | 8.612176 | 0.915847 | 1 RPS2P5         | K02981 |
| ENSG00000149262 | -0.075587 | 4.834353 | 0.915856 | 1 INTS4          | K13141 |
| ENSG00000182512 | -0.072024 | 5.795573 | 0.91598  | 1 GLRX5          | K07390 |
| ENSG00000103005 | -0.071045 | 6.201548 | 0.916043 | 1 USB1           | -      |
| ENSG00000117362 | 0.089751  | 3.129587 | 0.916148 | 1 APH1A          | K06172 |
| ENSG00000040933 | 0.075037  | 4.744976 | 0.916229 | 1 INPP4A         | K01109 |
| ENSG00000175110 | -0.070103 | 5.976354 | 0.916237 | 1 MRPS22         | K17401 |
| ENSG00000134294 | -0.06886  | 10.06907 | 0.916246 | 1 SLC38A2        | K14207 |
| ENSG00000166340 | -0.07034  | 6.628925 | 0.916273 | 1 TPP1           | K01279 |
| ENSG00000023191 | -0.069923 | 6.958208 | 0.916368 | 1 RNH1           | K16634 |
| ENSG00000105401 | 0.069078  | 8.06273  | 0.916467 | 1 CDC37          | K09554 |
| ENSG00000139734 | -0.070255 | 6.50793  | 0.916551 | 1 DIAPH3         | K05745 |
| ENSG00000131876 | 0.069586  | 7.007685 | 0.916574 | 1 SNRPA1         | K11092 |
| ENSG00000135547 | 0.077233  | 2.805384 | 0.916593 | 1 HEY2           | K09091 |
| ENSG00000120333 | 0.073946  | 4.652072 | 0.916651 | 1 MRPS14         | K02954 |
| ENSG00000100147 | 0.120952  | 1.739268 | 0.916668 | 1 CCDC134        | -      |
| ENSG00000166762 | 0.120952  | 1.739268 | 0.916668 | 1 CATSPER2       | K16890 |
| ENSG0000012124  | 0.093029  | 1.753778 | 0.916668 | 1 CD22           | K06467 |
| ENSG00000026036 | 0.093029  | 1.753778 | 0.916668 | 1 RTEL1-TNFRSF6B | K11136 |
| ENSG00000111325 | 0.093029  | 1.753778 | 0.916668 | 1 OGFOD2         | -      |
| ENSG00000116984 | 0.073474  | 4.933358 | 0.916696 | 1 MTR            | K00548 |
| ENSG00000095261 | -0.070227 | 6.429735 | 0.916706 | 1 PSMD5          | K06692 |

|                 |           |          |          |                |        |
|-----------------|-----------|----------|----------|----------------|--------|
| ENSG00000127914 | 0.072023  | 5.495732 | 0.91671  | 1 AKAP9        | K16551 |
| ENSG00000142687 | 0.072023  | 5.495732 | 0.91671  | 1 KIAA0319L    | -      |
| ENSG00000145990 | 0.071222  | 6.027269 | 0.91684  | 1 GFOD1        | K12581 |
| ENSG00000160932 | -0.068628 | 8.559119 | 0.916869 | 1 LY6E         | K06846 |
| ENSG00000131373 | -0.07337  | 5.715235 | 0.916916 | 1 HACL1        | K12261 |
| ENSG00000040199 | 0.075971  | 3.83972  | 0.916943 | 1 PHLPP2       | K16340 |
| ENSG00000169016 | 0.071742  | 4.012792 | 0.917086 | 1 E2F6         | K09390 |
| ENSG00000140265 | 0.072914  | 5.178374 | 0.917119 | 1 ZSCAN29      | K09230 |
| ENSG00000084090 | -0.068803 | 7.551169 | 0.917187 | 1 STARD7       | -      |
| ENSG00000119048 | -0.06959  | 6.59123  | 0.917233 | 1 UBE2B        | K10574 |
| ENSG00000125450 | 0.069275  | 6.700748 | 0.917279 | 1 NUP85        | K14304 |
| ENSG00000144580 | -0.072372 | 5.909361 | 0.917307 | 1 RQCD1        | K09228 |
| ENSG00000124659 | -0.072699 | 5.183437 | 0.917313 | 1 TBCC         | K18034 |
| ENSG00000099341 | 0.068891  | 7.103307 | 0.917325 | 1 PSMD8        | K03031 |
| ENSG00000164808 | -0.070926 | 5.564048 | 0.917367 | 1 SPIDR        | -      |
| ENSG00000128585 | -0.068873 | 5.955313 | 0.917447 | 1 MKLN1        | -      |
| ENSG00000063241 | -0.069316 | 6.594864 | 0.917558 | 1 ISOC2        | -      |
| ENSG00000140688 | -0.070267 | 4.863241 | 0.917575 | 1 C16orf58     | -      |
| ENSG00000139218 | -0.0688   | 7.000941 | 0.917681 | 1 SCAF11       | -      |
| ENSG00000132664 | -0.074622 | 4.4471   | 0.917689 | 1 POLR3F       | K03025 |
| ENSG00000205809 | 0.078859  | 3.154673 | 0.917714 | 1 KLRC2        | K06541 |
| ENSG00000167967 | 0.070921  | 5.778268 | 0.917733 | 1 E4F1         | K09193 |
| ENSG00000136381 | 0.069286  | 6.231397 | 0.917761 | 1 IREB2        | -      |
| ENSG00000123094 | 0.069237  | 6.340445 | 0.917811 | 1 RASSF8       | K09855 |
| ENSG00000167695 | 0.072573  | 5.19284  | 0.91789  | 1 FAM57A       | -      |
| ENSG00000238227 | -0.069352 | 6.004627 | 0.917907 | 1 C9orf69      | -      |
| ENSG00000142676 | 0.067485  | 9.69901  | 0.917946 | 1 RPL11        | K02868 |
| ENSG00000218227 | -0.200742 | 0.711721 | 0.917982 | 1 RP11-889L3.1 | K02885 |
| ENSG00000105700 | 0.070687  | 6.051282 | 0.918232 | 1 KXD1         | -      |
| ENSG00000169967 | 0.070687  | 6.051282 | 0.918232 | 1 MAP3K2       | K04420 |
| ENSG00000012171 | -0.077859 | 4.457136 | 0.918324 | 1 SEMA3B       | -      |
| ENSG00000102007 | 0.075346  | 3.864033 | 0.918384 | 1 PLP2         | -      |
| ENSG00000171227 | -0.070703 | 3.865846 | 0.918384 | 1 TMEM37       | -      |
| ENSG00000068400 | -0.079681 | 3.177725 | 0.918475 | 1 GRIPAP1      | -      |
| ENSG00000135604 | 0.078312  | 3.174252 | 0.918475 | 1 STX11        | K08487 |
| ENSG00000125871 | -0.072751 | 5.052167 | 0.918489 | 1 MGME1        | K19465 |
| ENSG00000159210 | -0.068264 | 6.843025 | 0.918508 | 1 SNF8         | K12188 |
| ENSG00000069702 | 0.06849   | 6.475738 | 0.918518 | 1 TGFBR3       | K05843 |
| ENSG00000020181 | -0.086534 | 2.840975 | 0.918522 | 1 GPR124       | K08461 |
| ENSG00000174738 | 0.070645  | 5.639072 | 0.918528 | 1 NR1D2        | K08531 |
| ENSG00000143190 | -0.069915 | 4.785886 | 0.918549 | 1 POU2F1       | K09364 |
| ENSG00000071539 | 0.067193  | 8.514577 | 0.918574 | 1 TRIP13       | K17985 |
| ENSG00000249471 | 0.089921  | 2.402366 | 0.918577 | 1 ZNF324B      | K09228 |
| ENSG00000236814 | -0.093294 | 1.801652 | 0.918602 | 1 RP11-446E9.1 | K03064 |
| ENSG00000140988 | -0.06682  | 11.30587 | 0.918617 | 1 RPS2         | K02981 |
| ENSG00000135297 | 0.069447  | 5.694339 | 0.918649 | 1 MTO1         | K03495 |
| ENSG00000145439 | -0.075161 | 4.334264 | 0.918678 | 1 CBR4         | K11539 |
| ENSG00000184110 | 0.067835  | 5.410629 | 0.91875  | 1 EIF3C        | K03252 |
| ENSG00000198189 | -0.069309 | 5.347478 | 0.918775 | 1 HSD17B11     | -      |
| ENSG00000198964 | 0.069375  | 5.697724 | 0.918783 | 1 SGMS1        | -      |
| ENSG00000179151 | -0.067853 | 6.179949 | 0.918902 | 1 EDC3         | K12615 |
| ENSG00000214022 | 0.067508  | 7.201649 | 0.918915 | 1 REPIN1       | K09228 |
| ENSG00000101752 | 0.068553  | 6.025918 | 0.91909  | 1 MIB1         | K10645 |
| ENSG00000153786 | -0.069474 | 5.984687 | 0.919116 | 1 ZDHHC7       | K18932 |
| ENSG00000197483 | -0.073141 | 4.054485 | 0.919196 | 1 ZNF628       | K09229 |
| ENSG00000182944 | -0.066779 | 8.343517 | 0.919196 | 1 EWSR1        | K13209 |
| ENSG00000103121 | -0.068035 | 6.498755 | 0.919247 | 1 CMC2         | K18172 |
| ENSG00000185386 | -0.068513 | 5.757184 | 0.919275 | 1 MAPK11       | K04441 |

|                 |           |          |          |                |              |
|-----------------|-----------|----------|----------|----------------|--------------|
| ENSG00000143207 | -0.070735 | 5.357138 | 0.919282 | 1 RFDW2        | K10143       |
| ENSG00000163344 | -0.076575 | 4.700811 | 0.919372 | 1 PMVK         | K13273       |
| ENSG00000156976 | -0.066325 | 9.445651 | 0.919422 | 1 EIF4A2       | K03257       |
| ENSG00000089177 | -0.08439  | 2.865196 | 0.919453 | 1 KIF16B       | K17916       |
| ENSG00000177311 | 0.067468  | 6.706634 | 0.919457 | 1 ZBTB38       | K10510       |
| ENSG00000096384 | -0.066034 | 11.28796 | 0.919571 | 1 HSP90AB1     | K04079       |
| ENSG00000147905 | 0.071803  | 5.226039 | 0.919757 | 1 ZCCHC7       | K12597       |
| ENSG00000174529 | -0.095245 | 2.433699 | 0.919814 | 1 TMM81        | -            |
| ENSG00000234602 | -0.095245 | 2.433699 | 0.919814 | 1 MCIDAS       | K10749       |
| ENSG00000105655 | 0.088743  | 2.435204 | 0.919814 | 1 ISYNA1       | K01858       |
| ENSG00000164010 | 0.088743  | 2.435204 | 0.919814 | 1 ERMAPP       | K06712       |
| ENSG00000196787 | 0.088743  | 2.435204 | 0.919814 | 1 HIST1H2AG    | K11251       |
| ENSG00000107281 | 0.066681  | 6.119745 | 0.919837 | 1 NPDC1        | K01509       |
| ENSG00000037042 | -0.08421  | 3.700506 | 0.919994 | 1 TUBG2        | K10389       |
| ENSG00000069345 | -0.067551 | 6.338964 | 0.920087 | 1 DNAJA2       | K09503       |
| ENSG00000171863 | 0.065838  | 8.679864 | 0.920165 | 1 RPS7         | K02993       |
| ENSG00000154978 | -0.068286 | 5.670318 | 0.920166 | 1 VOPP1        | -            |
| ENSG00000087269 | 0.067205  | 6.387835 | 0.920196 | 1 NOP14        | K14766       |
| ENSG00000163602 | 0.070886  | 5.160089 | 0.920219 | 1 RYBP         | K11469       |
| ENSG00000099785 | 0.080465  | 3.896735 | 0.92023  | 1              | 2-Mar K10657 |
| ENSG00000258634 | 0.074445  | 3.899749 | 0.92023  | 1 RP4-773N10.4 | -            |
| ENSG00000160183 | -0.070046 | 5.500582 | 0.920257 | 1 TMRSS3       | K09634       |
| ENSG00000196584 | -0.070046 | 5.500582 | 0.920257 | 1 XRCC2        | K10879       |
| ENSG00000092470 | 0.067265  | 5.439221 | 0.920345 | 1 WDR76        | K02159       |
| ENSG00000177519 | 0.067265  | 5.439221 | 0.920345 | 1 RPRM         | K10128       |
| ENSG00000144320 | 0.068851  | 4.365453 | 0.920346 | 1 KIAA1715     | -            |
| ENSG00000153046 | 0.066611  | 6.832832 | 0.920352 | 1 CDYL         | K00653       |
| ENSG00000115129 | 0.087659  | 2.872507 | 0.920363 | 1 TP53I3       | K10133       |
| ENSG00000083093 | -0.071508 | 4.075425 | 0.920411 | 1 PALB2        | K10897       |
| ENSG00000161999 | -0.070428 | 5.443293 | 0.920501 | 1 JMJD8        | K09561       |
| ENSG00000001631 | 0.070008  | 4.823011 | 0.920506 | 1 KRIT1        | K17705       |
| ENSG00000157353 | -0.074298 | 4.230641 | 0.920555 | 1 FUK          | K05305       |
| ENSG00000183770 | -0.074298 | 4.230641 | 0.920555 | 1 FOXL2        | K09405       |
| ENSG00000152061 | 0.071784  | 4.231728 | 0.920555 | 1 RABGAP1L     | -            |
| ENSG00000147874 | 0.066183  | 7.042697 | 0.92066  | 1 HAUS6        | K16589       |
| ENSG00000070159 | 0.068994  | 5.007525 | 0.920662 | 1 PTPN3        | K18027       |
| ENSG00000116793 | -0.073091 | 4.826639 | 0.920744 | 1 PHTF1        | -            |
| ENSG00000196943 | -0.070096 | 4.825082 | 0.920744 | 1 NOP9         | K14790       |
| ENSG00000078070 | -0.06905  | 4.237585 | 0.920911 | 1 MCCC1        | K01968       |
| ENSG00000256223 | 0.104264  | 2.458769 | 0.921013 | 1 ZNF10        | K09228       |
| ENSG00000168268 | -0.066471 | 6.061537 | 0.921055 | 1 NT5DC2       | -            |
| ENSG00000131462 | -0.066029 | 6.98235  | 0.921055 | 1 TUBG1        | K10389       |
| ENSG00000226328 | 0.074642  | 4.623878 | 0.921123 | 1 CTA-217C2.1  | -            |
| ENSG00000085662 | 0.065442  | 7.582383 | 0.921138 | 1 AKR1B1       | K00011       |
| ENSG00000137936 | -0.065756 | 7.156862 | 0.921208 | 1 BCAR3        | -            |
| ENSG00000138193 | -0.093891 | 2.895236 | 0.921253 | 1 PLCE1        | K05860       |
| ENSG00000001084 | -0.068235 | 4.929476 | 0.921254 | 1 GCLC         | K11204       |
| ENSG00000206538 | -0.067849 | 6.146919 | 0.921286 | 1 VGLL3        | -            |
| ENSG00000175220 | -0.070363 | 5.182226 | 0.921342 | 1 ARHGAP1      | K18470       |
| ENSG00000176619 | -0.065486 | 7.37302  | 0.921345 | 1 LMNB2        | K07611       |
| ENSG00000141198 | -0.068408 | 5.691681 | 0.921352 | 1 TOM1L1       | K02258       |
| ENSG00000100614 | -0.069564 | 5.255213 | 0.921366 | 1 PPM1A        | K04457       |
| ENSG00000122335 | 0.086396  | 3.22656  | 0.921383 | 1 SERAC1       | K04135       |
| ENSG00000172216 | 0.064977  | 8.141877 | 0.921405 | 1 CEBPB        | K10048       |
| ENSG00000047932 | -0.066043 | 6.663086 | 0.921422 | 1 GOPC         | K05088       |
| ENSG00000091073 | -0.070223 | 4.739045 | 0.921423 | 1 DTX2         | K06058       |
| ENSG00000242259 | -0.070223 | 4.739045 | 0.921423 | 1 C22orf39     | K17675       |
| ENSG00000167523 | 0.0861    | 3.495156 | 0.921464 | 1 SPATA33      | K02927       |

|                 |           |          |          |                |        |
|-----------------|-----------|----------|----------|----------------|--------|
| ENSG00000184207 | -0.06609  | 6.551129 | 0.921521 | 1 PGP          | K19269 |
| ENSG00000005339 | 0.06881   | 5.462291 | 0.921576 | 1 CREBBP       | K04498 |
| ENSG00000088992 | 0.07136   | 4.250291 | 0.921614 | 1 TESC         | K17612 |
| ENSG00000112695 | -0.065275 | 7.32379  | 0.921641 | 1 COX7A2       | K02270 |
| ENSG00000147437 | 0.153331  | 0.737896 | 0.92171  | 1 GNRH1        | K05252 |
| ENSG00000181135 | 0.153331  | 0.737896 | 0.92171  | 1 ZNF707       | K09228 |
| ENSG00000183032 | 0.153331  | 0.737896 | 0.92171  | 1 SLC25A21     | K15110 |
| ENSG00000236850 | 0.153331  | 0.737896 | 0.92171  | 1 BMS1P20      | -      |
| ENSG00000111837 | -0.130204 | 0.785177 | 0.92171  | 1 MAK          | K08829 |
| ENSG00000167984 | -0.130204 | 0.785177 | 0.92171  | 1 NLRC3        | -      |
| ENSG00000205534 | -0.130204 | 0.785177 | 0.92171  | 1 RP11-345J4.8 | K08873 |
| ENSG00000108958 | 0.094839  | 0.768291 | 0.92171  | 1 AC016292.3   | K00236 |
| ENSG00000105127 | 0.068152  | 5.587087 | 0.921734 | 1 AKAP8        | K16525 |
| ENSG00000134851 | 0.065367  | 6.816572 | 0.921875 | 1 TMEM165      | -      |
| ENSG00000112659 | 0.068391  | 4.748272 | 0.92192  | 1 CUL9         | K11970 |
| ENSG00000175354 | 0.067389  | 5.532213 | 0.922019 | 1 PTPN2        | K18026 |
| ENSG00000115310 | 0.064513  | 7.925265 | 0.922069 | 1 RTN4         | -      |
| ENSG00000204588 | -0.084094 | 3.239481 | 0.922078 | 1 LINC01123    | -      |
| ENSG00000066136 | -0.067899 | 5.652124 | 0.922135 | 1 NFYC         | K08066 |
| ENSG00000122257 | 0.065358  | 6.122893 | 0.92214  | 1 RBBP6        | K10624 |
| ENSG00000144426 | 0.067262  | 5.952724 | 0.922181 | 1 NBEAL1       | -      |
| ENSG00000155158 | -0.112802 | 1.864224 | 0.922212 | 1 TTC39B       | -      |
| ENSG00000157578 | -0.112802 | 1.864224 | 0.922212 | 1 LCA5L        | -      |
| ENSG00000234585 | -0.112802 | 1.864224 | 0.922212 | 1 CCT6P3       | K09498 |
| ENSG00000049246 | 0.089239  | 1.854325 | 0.922212 | 1 PER3         | K02633 |
| ENSG00000122557 | -0.072275 | 4.527227 | 0.922224 | 1 HERPUD2      | K17985 |
| ENSG00000179091 | -0.06429  | 8.278657 | 0.922244 | 1 CYC1         | K00413 |
| ENSG00000150776 | -0.067223 | 5.346399 | 0.922375 | 1 C11orf57     | -      |
| ENSG00000125503 | 0.067038  | 5.344147 | 0.922375 | 1 PPP1R12C     | K17457 |
| ENSG00000147050 | 0.06774   | 3.937536 | 0.922422 | 1 KDM6A        | K11447 |
| ENSG00000168273 | 0.06774   | 3.937536 | 0.922422 | 1 SMIM4        | -      |
| ENSG00000163870 | 0.06495   | 6.752102 | 0.922452 | 1 TPRA1        | -      |
| ENSG00000213178 | 0.065419  | 5.81535  | 0.922456 | 1 RP11-641D5.1 | K02891 |
| ENSG00000178127 | -0.069243 | 4.410421 | 0.922571 | 1 NDUFV2       | K03943 |
| ENSG00000138621 | -0.077782 | 3.517241 | 0.922613 | 1 PPCDC        | K01598 |
| ENSG00000151090 | -0.077782 | 3.517241 | 0.922613 | 1 THRB         | K08362 |
| ENSG00000189334 | 0.069837  | 3.518584 | 0.922613 | 1 S100A14      | -      |
| ENSG00000089234 | 0.06687   | 5.352761 | 0.922699 | 1 BRAP         | K10632 |
| ENSG00000196502 | 0.06942   | 4.117614 | 0.922735 | 1 SULT1A1      | K01014 |
| ENSG00000100926 | -0.082502 | 3.257902 | 0.922761 | 1 TM9SF1       | K17085 |
| ENSG00000171202 | -0.066127 | 4.957961 | 0.922762 | 1 TMEM126A     | K18157 |
| ENSG00000104904 | 0.063566  | 9.337174 | 0.922765 | 1 OAZ1         | K16548 |
| ENSG00000063322 | 0.064624  | 5.771852 | 0.922842 | 1 MED29        | K15142 |
| ENSG00000160294 | 0.064932  | 6.453873 | 0.922849 | 1 MCM3AP       | -      |
| ENSG00000228716 | 0.066671  | 6.053257 | 0.92286  | 1 DHFR         | K00287 |
| ENSG00000178971 | 0.078341  | 3.751246 | 0.922988 | 1 CTC1         | -      |
| ENSG00000183207 | 0.063816  | 7.722314 | 0.923025 | 1 RUVBL2       | K11338 |
| ENSG00000130813 | 0.074328  | 4.125128 | 0.923109 | 1 C19orf66     | -      |
| ENSG00000123739 | 0.067993  | 4.767729 | 0.923135 | 1 PLA2G12A     | K01047 |
| ENSG00000116580 | -0.068439 | 4.965004 | 0.923182 | 1 GON4L        | -      |
| ENSG00000005893 | -0.063959 | 7.303679 | 0.923253 | 1 LAMP2        | K06528 |
| ENSG00000115421 | -0.075638 | 3.953417 | 0.923266 | 1 PAPOLG       | K14376 |
| ENSG00000162961 | 0.0646    | 6.415843 | 0.923304 | 1 DPY30        | K14965 |
| ENSG00000163191 | 0.063158  | 9.053161 | 0.92332  | 1 S100A11      | -      |
| ENSG00000088832 | 0.063518  | 7.832653 | 0.923324 | 1 FKBP1A       | K09568 |
| ENSG00000027697 | 0.065231  | 6.260862 | 0.923329 | 1 IFNGR1       | K05132 |
| ENSG00000113360 | -0.06419  | 6.9091   | 0.923363 | 1 DROSHA       | K03685 |
| ENSG00000166411 | -0.066427 | 5.930372 | 0.923392 | 1 IDH3A        | K00030 |



|                 |           |          |          |                 |        |
|-----------------|-----------|----------|----------|-----------------|--------|
| ENSG00000241258 | -0.068579 | 5.140572 | 0.923403 | 1 CRCP          | K02927 |
| ENSG00000111725 | 0.067654  | 4.423853 | 0.923487 | 1 PRKAB1        | K07199 |
| ENSG00000189241 | -0.064488 | 6.520898 | 0.923503 | 1 TSPYL1        | K11284 |
| ENSG00000165629 | -0.063269 | 8.215904 | 0.92351  | 1 ATP5C1        | K02136 |
| ENSG00000163349 | 0.064164  | 6.189321 | 0.923589 | 1 HIPK1         | K08826 |
| ENSG00000130731 | -0.063664 | 7.260298 | 0.923648 | 1 C16orf13      | -      |
| ENSG00000105376 | 0.065946  | 5.787029 | 0.923676 | 1 ICAM5         | K06769 |
| ENSG00000135821 | -0.074736 | 3.964684 | 0.923681 | 1 GLUL          | K01915 |
| ENSG00000213699 | -0.068357 | 5.301526 | 0.923745 | 1 SLC35F6       | K17985 |
| ENSG00000085552 | -0.089591 | 2.941531 | 0.923807 | 1 IGSF9         | -      |
| ENSG00000057608 | -0.062945 | 8.429598 | 0.923813 | 1 GDI2          | K17255 |
| ENSG00000143612 | -0.062871 | 8.521469 | 0.923869 | 1 C1orf43       | -      |
| ENSG00000179979 | 0.112554  | 1.889096 | 0.923899 | 1 CRIPAK        | K11835 |
| ENSG00000227354 | 0.112554  | 1.889096 | 0.923899 | 1 RBM26-AS1     | -      |
| ENSG00000270145 | 0.112554  | 1.889096 | 0.923899 | 1 CTD-2267D19.6 | -      |
| ENSG00000175711 | -0.107666 | 1.911428 | 0.923899 | 1 B3GNTL1       | -      |
| ENSG00000177096 | -0.107666 | 1.911428 | 0.923899 | 1 FAM109B       | K01204 |
| ENSG00000189120 | 0.087536  | 1.902085 | 0.923899 | 1 SP6           | K09196 |
| ENSG00000232931 | -0.084271 | 1.898594 | 0.923899 | 1 LINC00342     | -      |
| ENSG00000014138 | 0.064769  | 6.155259 | 0.923912 | 1 POLA2         | K02321 |
| ENSG00000135048 | 0.063593  | 6.87342  | 0.923963 | 1 TMEM2         | K17429 |
| ENSG00000126003 | 0.066757  | 4.981384 | 0.924009 | 1 PLAGL2        | K19486 |
| ENSG00000177119 | 0.063582  | 6.829737 | 0.924023 | 1 ANO6          | K19500 |
| ENSG00000145012 | 0.064721  | 5.574252 | 0.924251 | 1 LPP           | K16676 |
| ENSG00000105186 | -0.064482 | 6.12448  | 0.924343 | 1 ANKRD27       | -      |
| ENSG00000004766 | -0.070878 | 4.894534 | 0.924368 | 1 CCDC132       | -      |
| ENSG00000070367 | 0.066515  | 5.577013 | 0.924386 | 1 EXOC5         | -      |
| ENSG00000099617 | 0.085513  | 2.529454 | 0.924406 | 1 EFNA2         | K05462 |
| ENSG00000187514 | 0.062068  | 10.34993 | 0.924447 | 1 PTMA          | K13784 |
| ENSG00000140299 | -0.063558 | 6.649185 | 0.924448 | 1 BNIP2         | K18448 |
| ENSG00000069812 | 0.069651  | 4.688276 | 0.924498 | 1 HES2          | K09087 |
| ENSG00000167107 | 0.066949  | 5.455309 | 0.924612 | 1 ACSF2         | K00666 |
| ENSG00000069020 | -0.076503 | 2.958222 | 0.924622 | 1 MAST4         | K08789 |
| ENSG00000125485 | 0.064431  | 5.243524 | 0.924699 | 1 DDX31         | K14806 |
| ENSG00000051180 | 0.063415  | 6.08849  | 0.9247   | 1 RAD51         | K04482 |
| ENSG00000143412 | 0.075319  | 3.28645  | 0.924739 | 1 ANXA9         | K17090 |
| ENSG00000272734 | 0.066111  | 3.291125 | 0.924739 | 1 ADIRF-AS1     | -      |
| ENSG00000171720 | -0.063667 | 6.332461 | 0.924791 | 1 HDAC3         | K11404 |
| ENSG00000226976 | -0.074126 | 3.562421 | 0.924813 | 1 COX6A1P2      | K02266 |
| ENSG00000136280 | -0.065976 | 4.9983   | 0.924819 | 1 CCM2          | -      |
| ENSG00000136874 | -0.076548 | 3.791876 | 0.924863 | 1 STX17         | K08491 |
| ENSG00000153339 | -0.065447 | 5.248304 | 0.924868 | 1 TRAPPC8       | K14572 |
| ENSG00000146007 | -0.062886 | 6.967726 | 0.924876 | 1 ZMAT2         | K12848 |
| ENSG00000113194 | -0.063342 | 6.175114 | 0.924902 | 1 FAF2          | K18726 |
| ENSG00000186001 | 0.069959  | 4.313441 | 0.924949 | 1 LRCH3         | -      |
| ENSG00000189343 | 0.062726  | 6.92487  | 0.92496  | 1 RPS2P46       | K02981 |
| ENSG00000178691 | 0.062957  | 6.567385 | 0.925086 | 1 SUZ12         | K02927 |
| ENSG00000008256 | -0.066034 | 5.174956 | 0.925207 | 1 CYTH3         | K18441 |
| ENSG00000115816 | -0.062439 | 7.160253 | 0.925224 | 1 CEBPZ         | K14832 |
| ENSG00000142937 | 0.061362  | 11.03012 | 0.925255 | 1 RPS8          | K02995 |
| ENSG00000175224 | 0.063075  | 6.319707 | 0.92529  | 1 ATG13         | K08331 |
| ENSG00000085511 | -0.072958 | 3.577173 | 0.925343 | 1 MAP3K4        | K04428 |
| ENSG00000085276 | -0.069309 | 3.307204 | 0.925376 | 1 MECOM         | K04462 |
| ENSG00000093009 | 0.06276   | 6.522757 | 0.925383 | 1 CDC45         | K06628 |
| ENSG00000170043 | 0.063549  | 5.920488 | 0.925386 | 1 TRAPPC1       | -      |
| ENSG00000143409 | 0.072992  | 2.971253 | 0.925419 | 1 FAM63A        | -      |
| ENSG00000164296 | 0.072992  | 2.971253 | 0.925419 | 1 TIGD6         | -      |
| ENSG00000006062 | -0.066288 | 4.916462 | 0.925434 | 1 MAP3K14       | -      |

|                 |           |          |          |                 |        |
|-----------------|-----------|----------|----------|-----------------|--------|
| ENSG00000163945 | 0.110123  | 1.935764 | 0.925514 | 1 UVSSA         | -      |
| ENSG00000224914 | 0.110123  | 1.935764 | 0.925514 | 1 LINC00863     | -      |
| ENSG00000100393 | 0.065549  | 5.182015 | 0.925558 | 1 EP300         | K04498 |
| ENSG00000100023 | -0.065329 | 5.184631 | 0.925558 | 1 PPIL2         | K10598 |
| ENSG00000140262 | -0.06336  | 5.97288  | 0.925581 | 1 TCF12         | K15603 |
| ENSG00000176261 | 0.063732  | 5.408566 | 0.925647 | 1 ZBTB80S       | K17985 |
| ENSG00000167969 | -0.062301 | 6.883715 | 0.925678 | 1 ECI1          | K13238 |
| ENSG00000149541 | 0.06546   | 5.186841 | 0.925732 | 1 B3GAT3        | K10158 |
| ENSG00000057757 | -0.065085 | 5.541635 | 0.925738 | 1 PITHD1        | -      |
| ENSG00000169727 | 0.061874  | 7.180609 | 0.925758 | 1 GPS1          | K12175 |
| ENSG00000149483 | -0.062994 | 5.544456 | 0.925873 | 1 TMEM138       | K17985 |
| ENSG00000139436 | -0.070939 | 4.332057 | 0.925895 | 1 GIT2          | K12487 |
| ENSG00000146828 | -0.06498  | 5.189445 | 0.925905 | 1 SLC12A9       | K14429 |
| ENSG00000101126 | -0.062343 | 6.653986 | 0.925911 | 1 ADNP          | -      |
| ENSG00000177045 | -0.07017  | 4.60314  | 0.926029 | 1 SIX5          | K19474 |
| ENSG00000204843 | -0.061727 | 7.204922 | 0.926045 | 1 DCTN1         | K04648 |
| ENSG00000140983 | -0.061833 | 6.952589 | 0.926168 | 1 RHOT2         | K07871 |
| ENSG00000171453 | -0.064702 | 5.672041 | 0.926187 | 1 POLR1C        | K03027 |
| ENSG00000171729 | 0.083852  | 2.987659 | 0.9262   | 1 TMEM51        | -      |
| ENSG00000121454 | 0.075708  | 3.589438 | 0.926382 | 1 LHX4          | K09374 |
| ENSG00000103343 | -0.063909 | 4.482766 | 0.926389 | 1 ZNF174        | K09230 |
| ENSG00000178252 | 0.063592  | 6.078138 | 0.926401 | 1 WDR6          | -      |
| ENSG00000131269 | 0.06395   | 5.617784 | 0.926486 | 1 ABCB7         | K05662 |
| ENSG00000116030 | 0.060908  | 7.801516 | 0.926508 | 1 SUMO1         | K12160 |
| ENSG00000243989 | -0.098458 | 2.56563  | 0.92651  | 1 ACY1          | K14677 |
| ENSG00000180185 | -0.063151 | 5.280243 | 0.926515 | 1 FAHD1         | K01557 |
| ENSG00000100991 | 0.061427  | 6.915447 | 0.926543 | 1 TRPC4AP       | K11796 |
| ENSG00000110719 | 0.061544  | 6.124771 | 0.926544 | 1 TCIRG1        | K02154 |
| ENSG00000108094 | 0.062671  | 6.206646 | 0.926552 | 1 CUL2          | K03870 |
| ENSG00000131100 | 0.06095   | 7.635393 | 0.926553 | 1 ATP6V1E1      | K02150 |
| ENSG00000172831 | -0.069163 | 4.8374   | 0.926563 | 1 CES2          | K03927 |
| ENSG00000150961 | 0.062238  | 6.081378 | 0.926586 | 1 SEC24D        | K14007 |
| ENSG00000050130 | -0.062131 | 5.845239 | 0.926624 | 1 JKAMP         | -      |
| ENSG00000196233 | -0.073549 | 3.829334 | 0.926649 | 1 LCOR          | -      |
| ENSG00000239382 | -0.073549 | 3.829334 | 0.926649 | 1 ALKBH6        | K10768 |
| ENSG00000139620 | 0.063713  | 5.993225 | 0.926678 | 1 KANSL2        | K18401 |
| ENSG00000132305 | -0.060901 | 7.654701 | 0.926695 | 1 IMMT          | K17785 |
| ENSG00000156471 | 0.060866  | 7.52063  | 0.926727 | 1 PTDSS1        | K08729 |
| ENSG00000126261 | -0.060711 | 7.900197 | 0.926775 | 1 UBA2          | K10685 |
| ENSG00000110713 | 0.060849  | 7.457638 | 0.92679  | 1 NUP98         | K14297 |
| ENSG00000073536 | -0.065012 | 5.285875 | 0.926836 | 1 NLE1          | K14855 |
| ENSG00000117632 | -0.060407 | 8.570283 | 0.926843 | 1 STMN1         | K04381 |
| ENSG00000100426 | 0.062191  | 5.500585 | 0.926884 | 1 ZBED4         | -      |
| ENSG00000174917 | 0.066574  | 5.127839 | 0.927032 | 1 C19orf70      | -      |
| ENSG00000140543 | -0.102866 | 1.957145 | 0.927062 | 1 DET1          | K10571 |
| ENSG00000076650 | 0.069983  | 3.830577 | 0.927082 | 1 GPATCH1       | K13123 |
| ENSG00000001497 | -0.060831 | 7.138954 | 0.927193 | 1 LAS1L         | K16912 |
| ENSG00000178935 | -0.075124 | 3.346646 | 0.927225 | 1 ZNF552        | K09228 |
| ENSG00000177200 | 0.067414  | 4.627469 | 0.927299 | 1 CHD9          | K14438 |
| ENSG00000115365 | 0.060406  | 7.453887 | 0.927331 | 1 LANCL1        | -      |
| ENSG00000148835 | 0.06552   | 5.046551 | 0.927335 | 1 TAF5          | K03130 |
| ENSG00000038295 | 0.061417  | 5.135357 | 0.927385 | 1 TLL1          | K09608 |
| ENSG00000175390 | -0.060083 | 8.19767  | 0.927386 | 1 EIF3F         | K03249 |
| ENSG00000167461 | 0.062858  | 5.575172 | 0.927464 | 1 RAB8A         | K07901 |
| ENSG00000159256 | 0.064437  | 4.954761 | 0.927477 | 1 MORC3         | -      |
| ENSG00000226085 | -0.095613 | 2.594877 | 0.927519 | 1 UQCRFS1P1     | K00411 |
| ENSG00000198105 | -0.068799 | 4.041185 | 0.927597 | 1 ZNF248        | K09228 |
| ENSG00000272068 | -0.07122  | 3.024268 | 0.927714 | 1 RP11-284F21.9 | -      |

|                 |           |          |          |                  |        |
|-----------------|-----------|----------|----------|------------------|--------|
| ENSG00000089327 | -0.060198 | 7.301753 | 0.927814 | 1 FXYD5          | K13362 |
| ENSG00000119760 | -0.06286  | 5.919553 | 0.927816 | 1 SUPT7L         | K11316 |
| ENSG00000124074 | 0.073564  | 3.356674 | 0.927821 | 1 ENKD1          | -      |
| ENSG00000119777 | 0.060891  | 6.388863 | 0.927828 | 1 TMEM214        | -      |
| ENSG00000108344 | 0.060116  | 7.176664 | 0.927893 | 1 PSMD3          | K03033 |
| ENSG00000165671 | -0.061898 | 5.870189 | 0.927909 | 1 NSD1           | K15588 |
| ENSG00000180818 | 0.061784  | 6.109605 | 0.927949 | 1 HOXC10         | K17444 |
| ENSG00000242071 | 0.059794  | 7.623646 | 0.927962 | 1 RPL7AP6        | K02936 |
| ENSG00000120647 | 0.062171  | 6.237206 | 0.928049 | 1 CCDC77         | K16757 |
| ENSG00000140319 | -0.059491 | 8.278543 | 0.92807  | 1 SRP14          | K03104 |
| ENSG00000196072 | 0.061184  | 5.150257 | 0.928082 | 1 BLOC1S2        | K16750 |
| ENSG00000152475 | 0.189768  | 0.907761 | 0.928218 | 1 ZNF837         | K09228 |
| ENSG00000176919 | 0.189768  | 0.907761 | 0.928218 | 1 C8G            | K03999 |
| ENSG00000227855 | 0.189768  | 0.907761 | 0.928218 | 1 DPY19L2P3      | -      |
| ENSG00000260401 | 0.189768  | 0.907761 | 0.928218 | 1 RP11-800A3.4   | -      |
| ENSG00000148296 | -0.166588 | 0.910136 | 0.928218 | 1 SURF6          | -      |
| ENSG00000221817 | -0.166588 | 0.910136 | 0.928218 | 1 RP11-137L10.6  | -      |
| ENSG00000268403 | -0.166588 | 0.910136 | 0.928218 | 1 AC132192.1     | -      |
| ENSG00000136378 | 0.13762   | 0.934613 | 0.928218 | 1 ADAMTS7        | K08622 |
| ENSG00000187838 | 0.13762   | 0.934613 | 0.928218 | 1 TMEM256-PLSCR3 | -      |
| ENSG00000259172 | 0.13762   | 0.934613 | 0.928218 | 1 RP11-299G20.2  | -      |
| ENSG00000064607 | 0.060593  | 6.338253 | 0.928263 | 1 SUGP2          | K13166 |
| ENSG00000057663 | -0.059408 | 6.282095 | 0.92829  | 1 ATG5           | K08339 |
| ENSG00000213930 | -0.068517 | 3.634721 | 0.928376 | 1 GALT           | K00965 |
| ENSG00000267080 | -0.082061 | 3.368171 | 0.928407 | 1 ASB16-AS1      | -      |
| ENSG00000123200 | 0.059723  | 6.245318 | 0.928455 | 1 ZC3H13         | -      |
| ENSG00000214944 | -0.064902 | 4.974787 | 0.928458 | 1 ARHGEF28       | K16529 |
| ENSG00000163468 | -0.058866 | 9.276941 | 0.928518 | 1 CCT3           | K09495 |
| ENSG00000175606 | -0.061953 | 6.0317   | 0.928593 | 1 TMEM70         | K17966 |
| ENSG00000170852 | -0.062296 | 5.885844 | 0.928638 | 1 KBTBD2         | K10470 |
| ENSG00000135862 | 0.059319  | 7.424306 | 0.92867  | 1 LAMC1          | K05635 |
| ENSG00000163159 | -0.059936 | 6.079816 | 0.92867  | 1 VPS72          | K11664 |
| ENSG00000142733 | -0.067215 | 4.062319 | 0.928695 | 1 MAP3K6         | K04425 |
| ENSG00000160714 | -0.0598   | 6.821125 | 0.92878  | 1 UBE2Q1         | K10582 |
| ENSG00000123268 | -0.059723 | 6.86692  | 0.92882  | 1 ATF1           | K09053 |
| ENSG00000106049 | 0.059697  | 6.720399 | 0.928847 | 1 HIBADH         | K00020 |
| ENSG00000147604 | -0.058459 | 10.15858 | 0.92887  | 1 RPL7           | K02937 |
| ENSG00000123352 | -0.06021  | 6.350852 | 0.928941 | 1 SPATS2         | -      |
| ENSG00000083642 | -0.060936 | 5.404482 | 0.928964 | 1 PDS5B          | K11267 |
| ENSG00000183853 | 0.059854  | 6.458354 | 0.928985 | 1 KIRREL         | -      |
| ENSG00000149311 | -0.06397  | 5.33123  | 0.929005 | 1 ATM            | K04728 |
| ENSG00000130520 | -0.058679 | 8.339374 | 0.92903  | 1 LSM4           | K12623 |
| ENSG00000095906 | 0.059734  | 6.533678 | 0.929031 | 1 NUBP2          | K03593 |
| ENSG00000068796 | -0.060652 | 5.729364 | 0.929037 | 1 KIF2A          | K10393 |
| ENSG00000142166 | -0.061367 | 5.670323 | 0.929073 | 1 IFNAR1         | K05130 |
| ENSG00000187555 | 0.059421  | 6.796167 | 0.929098 | 1 USP7           | K11838 |
| ENSG00000130511 | 0.059599  | 6.607065 | 0.929101 | 1 SSBP4          | -      |
| ENSG00000206053 | 0.058787  | 7.694814 | 0.929142 | 1 HN1L           | -      |
| ENSG00000182718 | 0.058131  | 10.5232  | 0.929219 | 1 ANXA2          | K17092 |
| ENSG00000177674 | 0.063212  | 4.664287 | 0.929243 | 1 AGTRAP         | -      |
| ENSG00000138942 | 0.063266  | 5.173535 | 0.929269 | 1 RNF185         | K10666 |
| ENSG00000099381 | 0.061081  | 5.792573 | 0.929333 | 1 SETD1A         | K11422 |
| ENSG00000162227 | -0.074278 | 3.652351 | 0.929333 | 1 TAF6L          | K03131 |
| ENSG00000198816 | 0.060847  | 6.00009  | 0.929369 | 1 ZNF358         | K09228 |
| ENSG00000161217 | -0.062463 | 5.551952 | 0.929411 | 1 PCYT1A         | K00968 |
| ENSG00000170421 | 0.057862  | 11.46544 | 0.929489 | 1 KRT8           | K07604 |
| ENSG00000184182 | -0.064728 | 4.897459 | 0.929498 | 1 UBE2F          | K10687 |
| ENSG00000148672 | -0.058483 | 7.833731 | 0.929518 | 1 GLUD1          | K00261 |

|                 |           |          |          |                 |        |
|-----------------|-----------|----------|----------|-----------------|--------|
| ENSG00000167671 | 0.059278  | 6.56552  | 0.929542 | 1 UBXN6         | K14011 |
| ENSG00000175575 | -0.066363 | 4.790632 | 0.929598 | 1 PAAF1         | K11887 |
| ENSG00000125352 | -0.062923 | 5.002401 | 0.929786 | 1 RNF113A       | K13127 |
| ENSG00000084676 | -0.066427 | 3.662658 | 0.929802 | 1 NCOA1         | K09101 |
| ENSG00000131503 | -0.067959 | 3.066683 | 0.929872 | 1 ANKHD1        | K16726 |
| ENSG00000144736 | 0.071152  | 4.259484 | 0.9299   | 1 SHQ1          | K14764 |
| ENSG00000108352 | 0.105715  | 2.024795 | 0.929971 | 1 RAPGEFL1      | K08019 |
| ENSG00000135164 | -0.059946 | 5.69084  | 0.930011 | 1 DMTF1         | -      |
| ENSG00000138468 | -0.079232 | 3.401698 | 0.93011  | 1 SENP7         | K08596 |
| ENSG00000232187 | -0.079232 | 3.401698 | 0.93011  | 1 FTH1P7        | K00522 |
| ENSG00000149273 | -0.057277 | 10.59998 | 0.930264 | 1 RPS3          | K02985 |
| ENSG00000176087 | -0.059254 | 6.284347 | 0.930338 | 1 SLC35A4       | K15273 |
| ENSG00000106636 | 0.058369  | 6.815376 | 0.930352 | 1 YKT6          | K08516 |
| ENSG00000145331 | 0.081806  | 2.646237 | 0.930385 | 1 TRMT10A       | K15445 |
| ENSG00000127329 | -0.076478 | 2.644226 | 0.930385 | 1 PTPRB         | K05694 |
| ENSG00000196204 | 0.066197  | 4.689993 | 0.930407 | 1 RNF216P1      | K11976 |
| ENSG00000108946 | -0.057865 | 7.608287 | 0.93041  | 1 PRKAR1A       | K04739 |
| ENSG00000140463 | 0.066318  | 4.27093  | 0.930514 | 1 BBS4          | K16531 |
| ENSG00000160953 | -0.058918 | 5.976374 | 0.93056  | 1 MUM1          | -      |
| ENSG00000158615 | -0.057214 | 8.972371 | 0.930599 | 1 PPP1R15B      | K17558 |
| ENSG00000271270 | 0.072355  | 3.407184 | 0.93066  | 1 TMCC1-AS1     | -      |
| ENSG00000108669 | -0.058388 | 6.121348 | 0.930685 | 1 CYTH1         | K18441 |
| ENSG00000153207 | 0.057815  | 7.166918 | 0.930691 | 1 AHCTF1        | -      |
| ENSG00000133612 | -0.058481 | 6.566502 | 0.930706 | 1 AGAP3         | K12491 |
| ENSG00000120942 | -0.069146 | 4.106278 | 0.930794 | 1 UBIAD1        | K18623 |
| ENSG00000127314 | -0.058189 | 6.689267 | 0.930894 | 1 RAP1B         | K07836 |
| ENSG00000171466 | 0.059098  | 5.291362 | 0.930904 | 1 ZNF562        | K09228 |
| ENSG00000089220 | -0.057242 | 8.053967 | 0.930906 | 1 PEBP1         | K04257 |
| ENSG00000159259 | -0.057978 | 5.7685   | 0.930927 | 1 CHAF1B        | K10751 |
| ENSG00000261040 | 0.059112  | 4.929088 | 0.931073 | 1 CTD-2319I12.1 | -      |
| ENSG00000130962 | -0.152925 | 1.000028 | 0.931075 | 1 PRRG1         | K00522 |
| ENSG00000158859 | -0.152925 | 1.000028 | 0.931075 | 1 ADAMTS4       | K07764 |
| ENSG00000175003 | -0.152925 | 1.000028 | 0.931075 | 1 SLC22A1       | K08198 |
| ENSG00000212766 | -0.152925 | 1.000028 | 0.931075 | 1 LINC00277     | -      |
| ENSG00000254531 | -0.152925 | 1.000028 | 0.931075 | 1 AP001816.1    | -      |
| ENSG00000134882 | -0.057738 | 6.960725 | 0.931122 | 1 UBAC2         | -      |
| ENSG00000166619 | 0.059871  | 5.651337 | 0.931156 | 1 BLCAP         | -      |
| ENSG00000104960 | 0.057658  | 6.868899 | 0.931158 | 1 PTOV1         | K15168 |
| ENSG00000000457 | -0.060605 | 3.426044 | 0.931201 | 1 SCYL3         | K17542 |
| ENSG00000149179 | 0.06023   | 5.213104 | 0.931216 | 1 C11orf49      | -      |
| ENSG00000163565 | 0.058116  | 6.360839 | 0.931226 | 1 IFI16         | -      |
| ENSG00000261461 | -0.074217 | 2.671952 | 0.931291 | 1 UBE2MP1       | K10579 |
| ENSG00000105486 | -0.059317 | 5.990924 | 0.931306 | 1 LIG1          | K10747 |
| ENSG00000066777 | 0.057911  | 5.378303 | 0.931333 | 1 ARFGEF1       | K18442 |
| ENSG00000147274 | -0.056842 | 8.108682 | 0.931364 | 1 RBMX          | K12885 |
| ENSG00000078142 | -0.061835 | 4.938063 | 0.931455 | 1 PIK3C3        | K00914 |
| ENSG00000165113 | -0.062731 | 4.123928 | 0.931466 | 1 GKAP1         | -      |
| ENSG00000183576 | 0.057662  | 6.225516 | 0.931494 | 1 SETD3         | K19199 |
| ENSG00000148572 | 0.062468  | 5.221356 | 0.93153  | 1 NRBF2         | -      |
| ENSG00000187954 | 0.057779  | 6.386234 | 0.931597 | 1 CYHR1         | -      |
| ENSG00000100029 | -0.056804 | 7.696115 | 0.931641 | 1 PES1          | K14843 |
| ENSG00000112697 | 0.056728  | 7.689926 | 0.931644 | 1 TMEM30A       | -      |
| ENSG00000256053 | -0.064348 | 4.301202 | 0.93171  | 1 APOPT1        | K10407 |
| ENSG00000161920 | 0.061278  | 4.300211 | 0.93171  | 1 MED11         | K15131 |
| ENSG00000035403 | 0.056626  | 7.627849 | 0.931805 | 1 VCL           | K05700 |
| ENSG00000147649 | 0.056324  | 8.284562 | 0.931853 | 1 MTDH          | -      |
| ENSG00000127324 | 0.061339  | 5.140341 | 0.931894 | 1 TSPAN8        | K17349 |
| ENSG00000230383 | 0.056666  | 6.004871 | 0.931945 | 1 AC009245.3    | K02934 |

|                 |           |          |          |                |        |
|-----------------|-----------|----------|----------|----------------|--------|
| ENSG00000174780 | -0.05661  | 7.558459 | 0.931969 | 1 SRP72        | K03108 |
| ENSG00000186787 | 0.066779  | 2.681306 | 0.932173 | 1 SPIN2B       | -      |
| ENSG00000015479 | -0.05588  | 9.013342 | 0.932209 | 1 MATR3        | K13213 |
| ENSG00000228630 | 0.056253  | 5.147793 | 0.932221 | 1 HOTAIR       | -      |
| ENSG00000082701 | 0.057285  | 6.342033 | 0.932259 | 1 GSK3B        | K03083 |
| ENSG00000164331 | -0.067373 | 3.44642  | 0.932259 | 1 ANKRA2       | -      |
| ENSG00000156509 | -0.06371  | 4.310066 | 0.932292 | 1 FBXO43       | K10318 |
| ENSG00000158796 | 0.057231  | 4.847643 | 0.9323   | 1 DEDD         | K12165 |
| ENSG00000166685 | 0.057231  | 4.847643 | 0.9323   | 1 COG1         | -      |
| ENSG00000036054 | -0.057372 | 6.344939 | 0.932384 | 1 TBC1D23      | -      |
| ENSG00000163684 | -0.06064  | 4.73407  | 0.932407 | 1 RPP14        | K14529 |
| ENSG00000143256 | 0.056942  | 6.529401 | 0.932416 | 1 PFDN2        | K09549 |
| ENSG00000100211 | -0.06132  | 4.143894 | 0.93245  | 1 CBY1         | -      |
| ENSG00000117385 | 0.056483  | 6.961912 | 0.932489 | 1 LEPRE1       | K08134 |
| ENSG00000183386 | -0.061906 | 4.852629 | 0.932499 | 1 FHL3         | -      |
| ENSG00000162813 | -0.058723 | 5.244831 | 0.932607 | 1 BPNT1        | K01082 |
| ENSG00000172661 | -0.090187 | 2.086237 | 0.932657 | 1 FAM21C       | K18462 |
| ENSG00000148225 | 0.081739  | 2.078715 | 0.932657 | 1 WDR31        | K16467 |
| ENSG00000136279 | 0.057829  | 6.020501 | 0.932662 | 1 DBNL         | -      |
| ENSG00000167881 | -0.056437 | 6.948358 | 0.932713 | 1 SRP68        | K03107 |
| ENSG00000049860 | -0.055616 | 8.206479 | 0.932807 | 1 HEXB         | K12373 |
| ENSG00000156535 | -0.055862 | 7.658421 | 0.932809 | 1 CD109        | K06530 |
| ENSG00000134109 | -0.058466 | 5.066598 | 0.932817 | 1 EDEM1        | K10084 |
| ENSG00000144118 | 0.056067  | 6.745132 | 0.933218 | 1 RALB         | K07835 |
| ENSG00000067167 | 0.055255  | 7.976276 | 0.933283 | 1 TRAM1        | K14010 |
| ENSG00000106400 | 0.055881  | 6.176621 | 0.933306 | 1 ZNHIT1       | K11663 |
| ENSG00000205629 | -0.064714 | 4.166077 | 0.933407 | 1 LCMT1        | K18203 |
| ENSG00000125458 | -0.05925  | 5.70099  | 0.933416 | 1 NT5C         | K01081 |
| ENSG00000121057 | 0.056785  | 5.880081 | 0.933532 | 1 AKAP1        | K16518 |
| ENSG00000112739 | -0.05541  | 7.356844 | 0.933577 | 1 PRPF4B       | -      |
| ENSG00000101439 | -0.05571  | 6.847651 | 0.933706 | 1 CST3         | K13899 |
| ENSG00000171169 | 0.064992  | 4.34188  | 0.933706 | 1 NAIF1        | K11447 |
| ENSG00000230195 | 0.131279  | 1.023736 | 0.933711 | 1 AC118138.2   | -      |
| ENSG00000263470 | 0.131279  | 1.023736 | 0.933711 | 1 RP11-160O5.1 | -      |
| ENSG00000269352 | 0.131279  | 1.023736 | 0.933711 | 1 AC018766.5   | -      |
| ENSG00000135245 | 0.061375  | 3.974353 | 0.933737 | 1 HILPDA       | K17985 |
| ENSG00000119927 | -0.073375 | 3.75008  | 0.933758 | 1 GPAM         | K00629 |
| ENSG00000114626 | 0.055844  | 5.18203  | 0.933811 | 1 ABTB1        | K10520 |
| ENSG00000119392 | -0.056945 | 6.2334   | 0.933845 | 1 GLE1         | K18723 |
| ENSG00000135931 | -0.08645  | 2.126834 | 0.933924 | 1 ARMC9        | -      |
| ENSG00000084710 | -0.06632  | 2.115892 | 0.933924 | 1 EFR3B        | -      |
| ENSG00000213420 | -0.06632  | 2.115892 | 0.933924 | 1 GPC2         | K08108 |
| ENSG00000125844 | 0.054885  | 7.409137 | 0.934061 | 1 RRBP1        | K14000 |
| ENSG00000099804 | 0.055556  | 6.484051 | 0.934153 | 1 CDC34        | K02207 |
| ENSG00000205517 | 0.060472  | 4.352689 | 0.934255 | 1 RGL3         | K17639 |
| ENSG00000149091 | -0.061086 | 4.774682 | 0.934295 | 1 DGKZ         | K00901 |
| ENSG00000114450 | 0.060879  | 5.000711 | 0.93437  | 1 GNB4         | K04538 |
| ENSG00000163125 | -0.058461 | 5.282493 | 0.934377 | 1 RPRD2        | -      |
| ENSG00000236565 | -0.070169 | 3.172662 | 0.934438 | 1 HNRNPA3P5    | K12741 |
| ENSG00000256060 | -0.060594 | 3.167579 | 0.934438 | 1 TRAPPC2P1    | K09228 |
| ENSG00000069956 | 0.055307  | 6.41838  | 0.934544 | 1 MAPK6        | K06855 |
| ENSG00000214413 | 0.063085  | 4.189154 | 0.934641 | 1 BBIP1        | K19399 |
| ENSG00000143862 | 0.059319  | 5.106365 | 0.934643 | 1 ARL8A        | K07955 |
| ENSG00000171067 | -0.055706 | 5.107864 | 0.934643 | 1 C11orf24     | K11504 |
| ENSG00000174136 | 0.061267  | 4.78377  | 0.934701 | 1 RGMB         | K06847 |
| ENSG00000167173 | 0.055629  | 5.850734 | 0.934711 | 1 C15orf39     | -      |
| ENSG00000179526 | -0.055393 | 6.374839 | 0.93473  | 1 SHARPIN      | -      |
| ENSG00000088305 | 0.056555  | 4.901476 | 0.934803 | 1 DNMT3B       | K17399 |

|                 |           |          |          |                  |        |
|-----------------|-----------|----------|----------|------------------|--------|
| ENSG00000198918 | 0.055131  | 6.340945 | 0.934868 | 1 RPL39          | K02924 |
| ENSG00000166004 | -0.056877 | 5.855127 | 0.934903 | 1 KIAA1731       | -      |
| ENSG00000186871 | 0.058057  | 4.522642 | 0.934919 | 1 ERCC6L         | -      |
| ENSG00000168556 | 0.054123  | 5.113995 | 0.934964 | 1 ING2           | K19198 |
| ENSG00000112977 | 0.053848  | 7.836637 | 0.935061 | 1 DAP            | -      |
| ENSG00000064995 | -0.054813 | 5.863438 | 0.935286 | 1 TAF11          | K03135 |
| ENSG00000266066 | 0.078645  | 2.754263 | 0.935487 | 1 POLRMTP1       | K10908 |
| ENSG00000177380 | 0.056341  | 4.918982 | 0.935536 | 1 PPFIA3         | -      |
| ENSG00000111271 | 0.057949  | 4.210681 | 0.935537 | 1 ACAD10         | K11729 |
| ENSG00000181704 | 0.054497  | 6.398236 | 0.935553 | 1 YIPF6          | -      |
| ENSG00000070614 | 0.053389  | 6.182667 | 0.935652 | 1 NDST1          | K02576 |
| ENSG00000101457 | 0.05462   | 4.805921 | 0.935693 | 1 DNNTIP1        | K08707 |
| ENSG00000119820 | -0.056276 | 5.931108 | 0.935766 | 1 YIPF4          | K17985 |
| ENSG00000166579 | 0.053841  | 6.138518 | 0.935797 | 1 NDEL1          | K16739 |
| ENSG00000145337 | -0.062381 | 4.389606 | 0.93585  | 1 PYURF          | K11001 |
| ENSG00000134748 | 0.054343  | 6.313076 | 0.935862 | 1 PRPF38A        | K12849 |
| ENSG00000179195 | 0.053694  | 6.959082 | 0.935874 | 1 ZNF664         | K09228 |
| ENSG00000005156 | 0.057711  | 4.810606 | 0.935888 | 1 LIG3           | K10776 |
| ENSG00000080815 | 0.055292  | 5.229573 | 0.935915 | 1 PSEN1          | K04505 |
| ENSG00000101843 | -0.054231 | 6.471392 | 0.935989 | 1 PSMD10         | K06694 |
| ENSG00000119318 | -0.052873 | 8.482834 | 0.936028 | 1 RAD23B         | K10839 |
| ENSG00000213341 | -0.053703 | 5.75963  | 0.93604  | 1 CHUK           | K04467 |
| ENSG00000006837 | 0.171263  | 1.084096 | 0.93615  | 1 CDKL3          | K08824 |
| ENSG00000183199 | 0.171263  | 1.084096 | 0.93615  | 1 HSP90AB3P      | K04079 |
| ENSG00000272473 | 0.171263  | 1.084096 | 0.93615  | 1 AC006273.4     | -      |
| ENSG00000149292 | -0.140967 | 1.08468  | 0.93615  | 1 TTC12          | -      |
| ENSG00000204044 | -0.140967 | 1.08468  | 0.93615  | 1 RP11-465L10.10 | -      |
| ENSG00000269906 | -0.140967 | 1.08468  | 0.93615  | 1 RP11-248J18.2  | -      |
| ENSG00000259256 | 0.077926  | 2.78005  | 0.936266 | 1 RP11-838N2.3   | -      |
| ENSG00000172922 | 0.055215  | 5.886767 | 0.936314 | 1 RNASEH2C       | K10745 |
| ENSG00000178764 | -0.102246 | 2.176867 | 0.936319 | 1 ZHX2           | -      |
| ENSG00000186807 | 0.079329  | 2.159526 | 0.936319 | 1 ANXA8L2        | K17096 |
| ENSG00000127423 | 0.057657  | 4.552861 | 0.936328 | 1 AUNIP          | K16800 |
| ENSG00000249859 | 0.055604  | 5.564086 | 0.936393 | 1 PVT1           | -      |
| ENSG00000172409 | -0.055887 | 4.940903 | 0.93643  | 1 CLP1           | K14399 |
| ENSG00000131437 | -0.058389 | 4.035739 | 0.936466 | 1 KIF3A          | K10394 |
| ENSG00000103249 | 0.053231  | 6.8606   | 0.936533 | 1 CLCN7          | K05016 |
| ENSG00000137193 | 0.054499  | 5.492813 | 0.936535 | 1 PIM1           | K04702 |
| ENSG00000167257 | 0.057772  | 3.812117 | 0.93654  | 1 RNF214         | -      |
| ENSG00000141759 | -0.053832 | 6.414961 | 0.936558 | 1 TXNL4A         | K12859 |
| ENSG00000164237 | -0.05266  | 7.77892  | 0.936621 | 1 CMBL           | K01061 |
| ENSG00000057252 | -0.053622 | 6.540849 | 0.936626 | 1 SOAT1          | K00637 |
| ENSG00000106399 | -0.054962 | 5.951091 | 0.936654 | 1 RPA3           | K10740 |
| ENSG00000132382 | 0.052998  | 6.958021 | 0.936719 | 1 MYBBP1A        | K02331 |
| ENSG00000156273 | 0.054131  | 6.110857 | 0.936743 | 1 BACH1          | K09042 |
| ENSG00000197217 | -0.058277 | 4.94803  | 0.93678  | 1 ENTPD4         | K12305 |
| ENSG00000167384 | 0.054958  | 4.042554 | 0.936791 | 1 ZNF180         | K09228 |
| ENSG00000115211 | 0.055475  | 5.57517  | 0.936849 | 1 EIF2B4         | K03680 |
| ENSG00000162733 | 0.052747  | 7.121307 | 0.936877 | 1 DDR2           | K05125 |
| ENSG00000145425 | -0.051835 | 10.43768 | 0.936898 | 1 RPS3A          | K02984 |
| ENSG00000167996 | 0.051746  | 11.81586 | 0.936917 | 1 FTH1           | K00522 |
| ENSG00000102996 | 0.053016  | 6.722036 | 0.936941 | 1 MMP15          | K07995 |
| ENSG00000165238 | -0.05934  | 4.242145 | 0.936977 | 1 WNK2           | K08867 |
| ENSG00000101391 | -0.055811 | 5.649514 | 0.937024 | 1 CDK5RAP1       | -      |
| ENSG00000171421 | 0.052653  | 6.919764 | 0.937174 | 1 MRPL36         | K02919 |
| ENSG00000152520 | -0.055082 | 4.717475 | 0.937328 | 1 PAN3           | K12572 |
| ENSG00000162337 | -0.053808 | 6.073983 | 0.937331 | 1 LRP5           | K03068 |
| ENSG00000109618 | -0.075002 | 3.23464  | 0.937352 | 1 SEPSECS        | K03341 |

|                 |           |          |          |                 |        |
|-----------------|-----------|----------|----------|-----------------|--------|
| ENSG0000008394  | 0.05185   | 8.079598 | 0.937373 | 1 MGST1         | K00799 |
| ENSG00000162607 | 0.051697  | 8.502561 | 0.937399 | 1 USP1          | K11832 |
| ENSG00000172361 | -0.079591 | 2.20477  | 0.937453 | 1 CCDC11        | -      |
| ENSG00000127054 | -0.054002 | 6.22464  | 0.937491 | 1 CPSF3L        | K13148 |
| ENSG00000158042 | -0.052381 | 7.074093 | 0.937502 | 1 MRPL17        | K02879 |
| ENSG00000070366 | 0.055568  | 4.721974 | 0.93753  | 1 SMG6          | K11124 |
| ENSG00000108433 | 0.055568  | 4.721974 | 0.93753  | 1 GOSR2         | K08496 |
| ENSG00000136240 | 0.05149   | 8.705015 | 0.93759  | 1 KDEL2         | K10949 |
| ENSG00000008283 | 0.053919  | 6.131026 | 0.937592 | 1 CYB561        | K08360 |
| ENSG00000132522 | 0.057447  | 3.83689  | 0.937662 | 1 GPS2          | K15307 |
| ENSG00000184897 | 0.051925  | 7.334713 | 0.937706 | 1 H1FX          | K11275 |
| ENSG00000186654 | 0.059251  | 4.43612  | 0.937859 | 1 PRR5          | -      |
| ENSG00000080503 | 0.05463   | 5.802031 | 0.937901 | 1 SMARCA2       | K11647 |
| ENSG00000180398 | -0.051623 | 7.717757 | 0.937918 | 1 MCFD2         | -      |
| ENSG00000008294 | 0.051901  | 7.074553 | 0.937944 | 1 SPAG9         | -      |
| ENSG00000168701 | 0.054453  | 5.08327  | 0.937996 | 1 TMEM208       | -      |
| ENSG00000186951 | 0.057289  | 3.849118 | 0.938027 | 1 PPARA         | K07294 |
| ENSG00000100994 | -0.051974 | 6.238067 | 0.938058 | 1 PYGB          | K00688 |
| ENSG00000132581 | 0.052749  | 5.984916 | 0.938107 | 1 SDF2          | -      |
| ENSG00000148334 | -0.052106 | 6.80752  | 0.938121 | 1 PTGES2        | K05309 |
| ENSG00000183943 | -0.055198 | 4.861682 | 0.938137 | 1 PRKX          | K19584 |
| ENSG00000065328 | -0.052535 | 6.386424 | 0.938172 | 1 MCM10         | K10736 |
| ENSG00000107960 | 0.057105  | 4.275542 | 0.938354 | 1 OBFC1         | -      |
| ENSG00000165661 | -0.052454 | 6.319925 | 0.938376 | 1 QSOX2         | K10758 |
| ENSG00000169330 | -0.130415 | 1.164667 | 0.938413 | 1 KIAA1024      | -      |
| ENSG00000174607 | -0.130415 | 1.164667 | 0.938413 | 1 UGT8          | K04628 |
| ENSG00000214783 | -0.130415 | 1.164667 | 0.938413 | 1 POLR2J4       | -      |
| ENSG00000254612 | 0.063871  | 2.836788 | 0.938492 | 1 RP11-676M6.1  | K09512 |
| ENSG00000167468 | 0.050663  | 8.596322 | 0.938627 | 1 GPX4          | K05361 |
| ENSG00000062282 | -0.054877 | 4.088205 | 0.938675 | 1 DGAT2         | K11160 |
| ENSG00000005022 | -0.050465 | 9.324954 | 0.938724 | 1 SLC25A5       | K05863 |
| ENSG00000136943 | 0.058911  | 4.460236 | 0.938818 | 1 CTSV          | K01375 |
| ENSG00000185019 | -0.072082 | 3.271377 | 0.938979 | 1 UBOX5         | K10600 |
| ENSG00000257337 | -0.072082 | 3.271377 | 0.938979 | 1 RP11-983P16.4 | -      |
| ENSG00000070610 | -0.054799 | 5.303735 | 0.939097 | 1 GBA2          | K17108 |
| ENSG00000089057 | 0.063076  | 3.870197 | 0.939098 | 1 SLC23A2       | K14611 |
| ENSG00000058262 | -0.05043  | 8.203834 | 0.939112 | 1 SEC61A1       | K10956 |
| ENSG00000187079 | -0.050298 | 7.960287 | 0.939389 | 1 TEAD1         | K09448 |
| ENSG00000196459 | 0.056765  | 4.302471 | 0.939413 | 1 TRAPPC2       | K12581 |
| ENSG00000197363 | -0.061863 | 3.284731 | 0.939503 | 1 ZNF517        | K09228 |
| ENSG00000170604 | -0.051437 | 5.48696  | 0.939583 | 1 IRF2BP1       | -      |
| ENSG00000113575 | -0.049902 | 8.341048 | 0.939696 | 1 PPP2CA        | K04382 |
| ENSG00000131263 | 0.05041   | 6.928064 | 0.939887 | 1 RLIM          | K16271 |
| ENSG00000113231 | -0.052558 | 5.232048 | 0.939981 | 1 PDE8B         | K18437 |
| ENSG00000174851 | -0.05035  | 7.054115 | 0.939986 | 1 YIF1A         | -      |
| ENSG00000096401 | -0.050993 | 6.394269 | 0.940027 | 1 CDC5L         | K12860 |
| ENSG00000128973 | 0.05362   | 5.576089 | 0.940054 | 1 CLN6          | K12359 |
| ENSG00000148429 | 0.053531  | 4.908805 | 0.940064 | 1 USP6NL        | K12581 |
| ENSG00000172007 | 0.060409  | 3.625661 | 0.940088 | 1 RAB33B        | K07920 |
| ENSG00000105048 | 0.050111  | 7.053235 | 0.940134 | 1 TNNT1         | K10372 |
| ENSG00000160753 | 0.051933  | 5.920468 | 0.94028  | 1 RUSC1         | -      |
| ENSG00000137818 | -0.048927 | 10.53509 | 0.940429 | 1 RPLP1         | K02942 |
| ENSG00000076770 | 0.059016  | 4.132796 | 0.940451 | 1 MBNL3         | K14943 |
| ENSG00000149577 | -0.057141 | 4.1314   | 0.940451 | 1 SIDT2         | -      |
| ENSG00000110768 | 0.049444  | 5.862837 | 0.940453 | 1 GTF2H1        | K03141 |
| ENSG00000170270 | 0.060197  | 3.639809 | 0.940492 | 1 C14orf142     | -      |
| ENSG00000149177 | 0.053195  | 5.426021 | 0.940498 | 1 PTPRJ         | K05698 |
| ENSG00000198586 | 0.053195  | 5.426021 | 0.940498 | 1 TLK1          | K08864 |

|                 |           |          |          |                 |              |
|-----------------|-----------|----------|----------|-----------------|--------------|
| ENSG00000164236 | 0.120762  | 1.186972 | 0.94052  | 1 ANKRD33B      | -            |
| ENSG00000188959 | 0.120762  | 1.186972 | 0.94052  | 1 C9orf152      | -            |
| ENSG00000171017 | -0.082731 | 1.219292 | 0.94052  | 1 LRRC8E        | -            |
| ENSG00000176749 | -0.082731 | 1.219292 | 0.94052  | 1 CDK5R1        | K11716       |
| ENSG00000126216 | -0.051694 | 5.864948 | 0.940541 | 1 TUBGCP3       | K16570       |
| ENSG00000224126 | 0.075293  | 2.878819 | 0.940568 | 1 UBE2SP2       | K10583       |
| ENSG00000115257 | -0.070653 | 2.882772 | 0.940568 | 1 PCSK4         | K08671       |
| ENSG00000130544 | -0.070653 | 2.882772 | 0.940568 | 1 ZNF557        | K09228       |
| ENSG00000064102 | -0.049741 | 7.206165 | 0.940584 | 1 ASUN          | -            |
| ENSG00000140525 | -0.049536 | 7.489903 | 0.940607 | 1 FANCI         | K10895       |
| ENSG00000250920 | 0.076183  | 2.272835 | 0.940623 | 1 RP11-297P16.4 | -            |
| ENSG00000272093 | -0.073444 | 2.278727 | 0.940623 | 1 CTC-365E16.1  | -            |
| ENSG00000254858 | 0.051876  | 5.343077 | 0.940759 | 1 MPV17L2       | K13348       |
| ENSG00000180822 | -0.051374 | 5.518868 | 0.940932 | 1 PSMG4         | K11878       |
| ENSG00000150712 | -0.05015  | 5.936856 | 0.940947 | 1 MTMR12        | K18085       |
| ENSG00000149485 | 0.04925   | 7.328437 | 0.940959 | 1 FADS1         | K10224       |
| ENSG00000151461 | -0.051152 | 6.053671 | 0.940975 | 1 UPF2          | K14327       |
| ENSG00000212747 | -0.067973 | 3.324791 | 0.941022 | 1 FAM127C       | -            |
| ENSG00000198015 | 0.049625  | 6.73031  | 0.941043 | 1 MRPL42        | K17423       |
| ENSG00000062650 | -0.049756 | 6.645736 | 0.941169 | 1 WAPAL         | -            |
| ENSG00000168439 | 0.048699  | 8.113079 | 0.941189 | 1 STIP1         | K09553       |
| ENSG00000131591 | 0.049244  | 4.671258 | 0.941211 | 1 C1orf159      | -            |
| ENSG00000114739 | 0.059988  | 3.65382  | 0.941285 | 1 ACVR2B        | K13596       |
| ENSG00000167644 | 0.049168  | 6.899684 | 0.941422 | 1 C19orf33      | -            |
| ENSG00000115694 | 0.049094  | 6.273349 | 0.941478 | 1 STK25         | K08838       |
| ENSG00000169564 | 0.048315  | 8.34553  | 0.941565 | 1 PCBP1         | K12889       |
| ENSG00000206149 | -0.051939 | 3.669352 | 0.941674 | 1 HERC2P9       | K10595       |
| ENSG00000162734 | 0.04929   | 6.535063 | 0.941678 | 1 PEA15         | -            |
| ENSG00000166140 | 0.051625  | 5.95482  | 0.941679 | 1 ZFYVE19       | -            |
| ENSG00000084754 | -0.04837  | 7.927715 | 0.941751 | 1 HADHA         | K07515       |
| ENSG00000106070 | -0.04904  | 6.129534 | 0.941817 | 1 GRB10         | -            |
| ENSG00000168385 | 0.04804   | 8.544263 | 0.941834 | 1               | 2-Sep K16942 |
| ENSG00000197905 | 0.04876   | 5.959052 | 0.941839 | 1 TEAD4         | K09448       |
| ENSG00000241360 | 0.066564  | 3.677913 | 0.942057 | 1 PDXP          | K07758       |
| ENSG00000213024 | -0.048764 | 6.910258 | 0.94206  | 1 NUP62         | K14306       |
| ENSG00000155858 | -0.064589 | 3.947619 | 0.942098 | 1 LSM11         | K17985       |
| ENSG00000065029 | 0.050335  | 3.9463   | 0.942098 | 1 ZNF76         | -            |
| ENSG00000138604 | 0.048867  | 6.136013 | 0.942101 | 1 GLCE          | K01793       |
| ENSG00000125818 | -0.050753 | 5.466281 | 0.942107 | 1 PSMF1         | K06700       |
| ENSG00000131116 | -0.059275 | 4.173336 | 0.942126 | 1 ZNF428        | K02914       |
| ENSG00000142751 | 0.055884  | 4.69513  | 0.942175 | 1 GPN2          | K06883       |
| ENSG00000102901 | 0.048541  | 5.185662 | 0.942206 | 1 CENPT         | K11512       |
| ENSG00000205302 | -0.048783 | 6.75816  | 0.942209 | 1 SNX2          | K17917       |
| ENSG00000182272 | 0.048746  | 6.612417 | 0.942244 | 1 B4GALNT4      | K09657       |
| ENSG00000116704 | 0.053956  | 4.547265 | 0.942373 | 1 SLC35D1       | K15281       |
| ENSG00000139266 | -0.05476  | 4.376945 | 0.942383 | 1               | 9-Mar K10659 |
| ENSG00000168092 | 0.0486    | 6.633777 | 0.942395 | 1 PAFAH1B2      | K16795       |
| ENSG00000101407 | -0.049034 | 5.556621 | 0.942432 | 1 TTI1          | -            |
| ENSG00000182899 | -0.047351 | 9.716844 | 0.942445 | 1 RPL35A        | K02917       |
| ENSG00000174796 | 0.064803  | 3.361117 | 0.942466 | 1 THAP6         | -            |
| ENSG00000141699 | 0.050891  | 5.194071 | 0.942475 | 1 FAM134C       | -            |
| ENSG00000273143 | 0.116353  | 1.26214  | 0.942485 | 1 RP11-525A16.4 | -            |
| ENSG00000174840 | 0.051843  | 5.084568 | 0.94249  | 1 PDE12         | K19612       |
| ENSG00000005448 | -0.088056 | 2.323796 | 0.942563 | 1 WDR54         | K17985       |
| ENSG00000262246 | -0.088056 | 2.323796 | 0.942563 | 1 CORO7         | K18619       |
| ENSG00000099995 | 0.048176  | 6.823492 | 0.942702 | 1 SF3A1         | K12825       |
| ENSG00000173918 | 0.061552  | 3.963145 | 0.942725 | 1 C1QTNF1       | K19470       |
| ENSG00000081014 | 0.052335  | 4.710307 | 0.942738 | 1 AP4E1         | K09131       |



|                 |           |          |          |                 |        |
|-----------------|-----------|----------|----------|-----------------|--------|
| ENSG00000111716 | -0.046993 | 11.14531 | 0.94274  | 1 LDHB          | K00016 |
| ENSG00000089682 | -0.05494  | 4.557235 | 0.942788 | 1 RBM41         | -      |
| ENSG00000197568 | 0.050107  | 4.556637 | 0.942788 | 1 HHLA3         | -      |
| ENSG00000164291 | -0.056842 | 3.700113 | 0.942809 | 1 ARSK          | K12376 |
| ENSG00000108510 | -0.05036  | 6.045066 | 0.942911 | 1 MED13         | K15164 |
| ENSG00000155545 | -0.050856 | 5.399292 | 0.942917 | 1 MIER3         | -      |
| ENSG00000170315 | -0.046984 | 9.050998 | 0.943021 | 1 UBB           | K04551 |
| ENSG00000173272 | 0.048847  | 5.724501 | 0.943067 | 1 MZT2A         | K16574 |
| ENSG00000100883 | -0.048252 | 6.582181 | 0.943077 | 1 SRP54         | K03106 |
| ENSG00000258839 | 0.07354   | 2.948694 | 0.943128 | 1 MC1R          | K04199 |
| ENSG00000119720 | -0.065377 | 2.952282 | 0.943128 | 1 NRDE2         | -      |
| ENSG00000169981 | -0.065377 | 2.952282 | 0.943128 | 1 ZNF35         | K09228 |
| ENSG00000119125 | -0.047172 | 7.816779 | 0.943269 | 1 GDA           | K01487 |
| ENSG00000104964 | 0.046782  | 8.757116 | 0.943302 | 1 AES           | K04497 |
| ENSG00000068615 | 0.051411  | 4.399231 | 0.94331  | 1 REEP1         | K17338 |
| ENSG00000101109 | -0.047239 | 5.318088 | 0.943446 | 1 STK4          | K04411 |
| ENSG00000198056 | 0.04832   | 5.219021 | 0.943528 | 1 PRIM1         | K02684 |
| ENSG00000108883 | -0.046955 | 7.705019 | 0.943598 | 1 EFTUD2        | K12852 |
| ENSG00000068120 | 0.046851  | 7.7074   | 0.943633 | 1 COASY         | K02318 |
| ENSG00000182606 | 0.047657  | 5.323496 | 0.943687 | 1 TRAK1         | K15369 |
| ENSG00000107815 | -0.050289 | 5.813642 | 0.943723 | 1 C10orf2       | K17680 |
| ENSG00000118007 | -0.049463 | 4.584874 | 0.943801 | 1 STAG1         | K06671 |
| ENSG00000125319 | 0.052088  | 4.736872 | 0.943833 | 1 C17orf53      | -      |
| ENSG00000174243 | 0.046759  | 7.476411 | 0.943884 | 1 DDX23         | K12858 |
| ENSG00000143742 | -0.046517 | 8.142958 | 0.943897 | 1 SRP9          | K03109 |
| ENSG00000011007 | 0.050579  | 5.231915 | 0.94404  | 1 TCEB3         | K15076 |
| ENSG00000163872 | 0.048486  | 5.515046 | 0.944052 | 1 YEATS2        | K12581 |
| ENSG00000115286 | -0.047331 | 6.671352 | 0.944076 | 1 NDUFS7        | K03940 |
| ENSG00000075568 | 0.050778  | 4.886742 | 0.944182 | 1 TMEM131       | -      |
| ENSG00000165185 | 0.055334  | 4.421892 | 0.944207 | 1 KIAA1958      | K11447 |
| ENSG00000103018 | -0.046627 | 7.39594  | 0.94421  | 1 CYB5B         | -      |
| ENSG00000150403 | 0.046849  | 6.91974  | 0.944216 | 1 TMCO3         | -      |
| ENSG00000185485 | 0.058819  | 3.735139 | 0.944257 | 1 SDHAP1        | K00234 |
| ENSG00000197044 | -0.112638 | 1.312521 | 0.944323 | 1 ZNF441        | K09228 |
| ENSG00000217716 | 0.061512  | 2.977126 | 0.944326 | 1 RPS10P3       | K02947 |
| ENSG00000155846 | 0.055326  | 4.01025  | 0.944528 | 1 PPARGC1B      | K17962 |
| ENSG00000130766 | 0.051909  | 4.75648  | 0.94454  | 1 SESN2         | K10141 |
| ENSG00000089009 | -0.045607 | 9.765373 | 0.944561 | 1 RPL6          | K02934 |
| ENSG00000168040 | 0.051127  | 4.432116 | 0.944645 | 1 FADD          | K02373 |
| ENSG00000108061 | 0.047894  | 6.091032 | 0.944702 | 1 SHOC2         | K19613 |
| ENSG00000237506 | 0.049664  | 5.027885 | 0.944759 | 1 RPSAP15       | K02998 |
| ENSG00000146143 | -0.055148 | 4.610259 | 0.944779 | 1 PRIM2         | K02685 |
| ENSG00000126226 | 0.046029  | 7.316913 | 0.94488  | 1 PCID2         | -      |
| ENSG00000005955 | -0.072927 | 3.002586 | 0.944907 | 1 GGNBP2        | -      |
| ENSG00000160207 | -0.062133 | 2.996835 | 0.944907 | 1 HSF2BP        | -      |
| ENSG00000181544 | -0.05971  | 3.756396 | 0.944953 | 1 FANCB         | K10889 |
| ENSG00000109854 | 0.046613  | 6.503975 | 0.944962 | 1 HTATIP2       | K17290 |
| ENSG00000170545 | -0.054208 | 4.249036 | 0.944966 | 1 SMAGP         | -      |
| ENSG00000074219 | -0.047975 | 5.150446 | 0.944975 | 1 TEAD2         | K09448 |
| ENSG00000141384 | 0.04973   | 4.023856 | 0.945104 | 1 TAF4B         | K03129 |
| ENSG00000226944 | 0.063615  | 3.427869 | 0.945153 | 1 RP1-120G22.11 | -      |
| ENSG00000122033 | -0.048181 | 4.774629 | 0.945229 | 1 MTIF3         | K02520 |
| ENSG00000169714 | 0.04509   | 8.988796 | 0.945304 | 1 CNBP          | K09250 |
| ENSG00000109475 | -0.045181 | 8.513437 | 0.945373 | 1 RPL34         | K02915 |
| ENSG00000051009 | 0.048505  | 4.777438 | 0.945398 | 1 FAM160A2      | -      |
| ENSG00000076248 | -0.045894 | 7.028503 | 0.94542  | 1 UNG           | K03648 |
| ENSG00000198642 | -0.047442 | 5.551956 | 0.945477 | 1 KLHL9         | K10447 |
| ENSG00000116957 | -0.04655  | 5.715259 | 0.945514 | 1 TBCE          | -      |

|                 |           |          |          |                 |        |
|-----------------|-----------|----------|----------|-----------------|--------|
| ENSG00000100401 | -0.045258 | 7.962074 | 0.945516 | 1 RANGAP1       | K14319 |
| ENSG00000137693 | -0.045235 | 7.83649  | 0.945612 | 1 YAP1          | K16687 |
| ENSG00000161654 | -0.050508 | 4.788984 | 0.945734 | 1 LSM12         | -      |
| ENSG00000215041 | -0.046002 | 5.054747 | 0.94575  | 1 NEURL4        | K16777 |
| ENSG00000119969 | -0.048198 | 5.796392 | 0.945781 | 1 HELLS         | K19001 |
| ENSG00000109881 | -0.047405 | 6.176972 | 0.945791 | 1 CCDC34        | K16753 |
| ENSG00000131236 | 0.044895  | 8.113058 | 0.945816 | 1 CAP1          | K17261 |
| ENSG00000105879 | -0.046506 | 5.174925 | 0.945884 | 1 CBLL1         | K15685 |
| ENSG00000118495 | -0.04702  | 5.941149 | 0.946011 | 1 PLAGL1        | K19485 |
| ENSG00000111087 | -0.105081 | 1.381158 | 0.946047 | 1 GLI1          | K16797 |
| ENSG00000185332 | -0.105081 | 1.381158 | 0.946047 | 1 TMEM105       | -      |
| ENSG00000154654 | 0.075083  | 1.353153 | 0.946047 | 1 NCAM2         | K06491 |
| ENSG00000232995 | 0.075083  | 1.353153 | 0.946047 | 1 RP11-267N12.3 | -      |
| ENSG00000251603 | 0.075083  | 1.353153 | 0.946047 | 1 RP11-164P12.4 | -      |
| ENSG00000166086 | -0.070456 | 1.362087 | 0.946047 | 1 JAM3          | K06785 |
| ENSG00000066455 | 0.04628   | 5.568711 | 0.946066 | 1 GOLGA5        | -      |
| ENSG00000261189 | -0.079155 | 2.424978 | 0.946086 | 1 RP3-512B11.3  | -      |
| ENSG00000241878 | -0.047304 | 5.388864 | 0.946097 | 1 PISD          | -      |
| ENSG00000170471 | -0.047628 | 5.805829 | 0.946112 | 1 RALGAPB       | -      |
| ENSG00000140526 | 0.050351  | 4.939159 | 0.946195 | 1 ABHD2         | -      |
| ENSG00000114853 | 0.049489  | 4.055859 | 0.94622  | 1 ZBTB47        | K10518 |
| ENSG00000242612 | 0.048336  | 4.802805 | 0.946231 | 1 DECR2         | K13237 |
| ENSG00000116005 | 0.045065  | 6.995254 | 0.946312 | 1 PCYOX1        | K05906 |
| ENSG00000174013 | 0.047103  | 5.738535 | 0.946386 | 1 FBXO45        | K10319 |
| ENSG00000185359 | -0.045708 | 6.41293  | 0.946401 | 1 HGS           | K12182 |
| ENSG00000197622 | -0.046343 | 5.952523 | 0.946458 | 1 CDC42SE1      | -      |
| ENSG00000163428 | 0.044821  | 7.053212 | 0.946557 | 1 LRRC58        | K17985 |
| ENSG00000254598 | -0.069565 | 3.045631 | 0.946578 | 1 CSNK2A3       | K03097 |
| ENSG00000204104 | -0.046923 | 4.29214  | 0.946632 | 1 TRAF3IP1      | K19680 |
| ENSG00000247596 | 0.047402  | 4.951979 | 0.946639 | 1 TWF2          | K08870 |
| ENSG00000205531 | -0.044566 | 7.359034 | 0.946743 | 1 NAP1L4        | K11282 |
| ENSG00000178531 | -0.049522 | 5.083489 | 0.946841 | 1 CTXN1         | -      |
| ENSG00000215421 | -0.07646  | 2.457194 | 0.9469   | 1 ZNF407        | -      |
| ENSG00000121848 | -0.060548 | 2.448619 | 0.9469   | 1 RNF115        | K11982 |
| ENSG00000094804 | -0.044232 | 7.715711 | 0.946902 | 1 CDC6          | K02213 |
| ENSG00000164611 | 0.043984  | 8.101441 | 0.946928 | 1 PTTG1         | K06635 |
| ENSG00000141026 | 0.050595  | 4.49572  | 0.946936 | 1 MED9          | K15149 |
| ENSG00000157540 | -0.045816 | 5.755586 | 0.94698  | 1 DYRK1A        | K08825 |
| ENSG00000102225 | 0.044271  | 7.344966 | 0.946996 | 1 CDK16         | -      |
| ENSG00000121390 | -0.046006 | 5.512158 | 0.947191 | 1 PSPC1         | K13219 |
| ENSG00000130695 | 0.048173  | 4.827734 | 0.947197 | 1 CEP85         | K16766 |
| ENSG00000149636 | 0.045348  | 5.762164 | 0.94723  | 1 DSN1          | K11544 |
| ENSG00000270504 | -0.055415 | 3.819816 | 0.947259 | 1 RP11-420L9.5  | -      |
| ENSG00000197329 | -0.049319 | 3.816629 | 0.947259 | 1 PELI1         | K11964 |
| ENSG00000140948 | 0.047684  | 5.319107 | 0.947268 | 1 ZCCHC14       | -      |
| ENSG00000132964 | 0.046629  | 4.505433 | 0.947332 | 1 CDK8          | K02208 |
| ENSG00000100347 | 0.044199  | 6.043267 | 0.947404 | 1 SAMM50        | K07277 |
| ENSG00000168216 | 0.049126  | 5.101283 | 0.9475   | 1 LMBRD1        | K14617 |
| ENSG00000185834 | 0.047726  | 4.315819 | 0.947539 | 1 RPL12P4       | K02870 |
| ENSG00000031698 | 0.043288  | 8.482416 | 0.947635 | 1 SARS          | K01875 |
| ENSG00000124784 | -0.045186 | 6.173337 | 0.947719 | 1 RIOK1         | K07178 |
| ENSG00000133597 | -0.044627 | 5.434188 | 0.9478   | 1 ADCK2         | K08869 |
| ENSG00000251369 | 0.049185  | 4.097454 | 0.947813 | 1 ZNF550        | K09228 |
| ENSG00000198356 | 0.044111  | 6.651759 | 0.947819 | 1 ASNA1         | K01551 |
| ENSG00000186020 | 0.062275  | 3.507185 | 0.947986 | 1 ZNF529        | K17985 |
| ENSG0000020922  | -0.044904 | 5.92825  | 0.947991 | 1 MRE11A        | K10865 |
| ENSG00000138386 | -0.045511 | 5.704369 | 0.947997 | 1 NAB1          | -      |
| ENSG00000161526 | -0.045939 | 6.181212 | 0.948027 | 1 SAP30BP       | -      |

|                 |           |          |          |                |        |
|-----------------|-----------|----------|----------|----------------|--------|
| ENSG00000161956 | -0.046848 | 5.623074 | 0.948029 | 1 SENP3        | K08593 |
| ENSG00000066027 | -0.044918 | 6.000571 | 0.948175 | 1 PPP2R5A      | K11584 |
| ENSG00000181690 | 0.05122   | 3.840036 | 0.948189 | 1 PLAG1        | -      |
| ENSG00000225138 | -0.04518  | 5.23786  | 0.948208 | 1 CTD-2228K2.7 | -      |
| ENSG00000126453 | -0.046749 | 5.711917 | 0.948252 | 1 BCL2L12      | -      |
| ENSG00000160551 | -0.045083 | 6.066825 | 0.948276 | 1 TAOK1        | K04429 |
| ENSG00000162604 | -0.043764 | 5.790864 | 0.948289 | 1 TM2D1        | K10734 |
| ENSG00000130311 | 0.043884  | 6.131003 | 0.948368 | 1 DDA1         | K11792 |
| ENSG00000239887 | -0.073885 | 2.488709 | 0.948457 | 1 C1orf226     | K16513 |
| ENSG00000119509 | -0.048569 | 4.538453 | 0.948486 | 1 INVS         | K19626 |
| ENSG00000189043 | -0.043185 | 7.227125 | 0.948529 | 1 NDUFA4       | K03948 |
| ENSG00000108509 | 0.043878  | 5.13414  | 0.948647 | 1 CAMTA2       | -      |
| ENSG00000003756 | 0.043859  | 5.723667 | 0.94867  | 1 RBM5         | K13094 |
| ENSG00000144566 | -0.043745 | 5.948273 | 0.948712 | 1 RAB5A        | K03283 |
| ENSG00000145741 | -0.042218 | 9.58533  | 0.948716 | 1 BTF3         | K01527 |
| ENSG00000111786 | -0.042976 | 7.210051 | 0.948796 | 1 SRSF9        | K12890 |
| ENSG00000109819 | -0.052245 | 4.128849 | 0.948823 | 1 PPARGC1A     | -      |
| ENSG00000148090 | -0.048166 | 4.720774 | 0.948872 | 1 AUH          | K05607 |
| ENSG00000044574 | 0.04199   | 10.36923 | 0.948879 | 1 HSPA5        | K09490 |
| ENSG00000132604 | -0.042952 | 5.01461  | 0.948889 | 1 TERF2        | K11111 |
| ENSG00000170860 | -0.044799 | 5.954649 | 0.948924 | 1 LSM3         | K12622 |
| ENSG00000170638 | -0.043047 | 6.920815 | 0.948986 | 1 TRABD        | -      |
| ENSG00000100503 | -0.046072 | 5.262058 | 0.949014 | 1 NIN          | K16476 |
| ENSG00000153487 | -0.043841 | 5.260912 | 0.949014 | 1 ING1         | K19197 |
| ENSG00000167113 | -0.043841 | 5.260912 | 0.949014 | 1 COQ4         | K18586 |
| ENSG00000142330 | -0.051303 | 4.555351 | 0.949045 | 1 CAPN10       | K08579 |
| ENSG00000221890 | -0.046731 | 4.136296 | 0.949069 | 1 NPTXR        | K12581 |
| ENSG00000173486 | 0.04482   | 5.470232 | 0.949106 | 1 FKBP2        | K09569 |
| ENSG00000244509 | -0.045703 | 5.889572 | 0.949143 | 1 APOBEC3C     | K18750 |
| ENSG00000154917 | -0.130542 | 1.464597 | 0.949189 | 1 RAB6B        | K07894 |
| ENSG00000174500 | -0.130542 | 1.464597 | 0.949189 | 1 GCSAM        | -      |
| ENSG00000176678 | -0.098243 | 1.446694 | 0.949189 | 1 FOXL1        | K09405 |
| ENSG00000250509 | -0.098243 | 1.446694 | 0.949189 | 1 CTC-573N18.1 | -      |
| ENSG00000198496 | 0.054541  | 2.515249 | 0.949201 | 1 NBR2         | K04135 |
| ENSG00000233937 | 0.054541  | 2.515249 | 0.949201 | 1 CTC-338M12.4 | -      |
| ENSG00000089063 | 0.043546  | 5.816879 | 0.94923  | 1 TMEM230      | -      |
| ENSG00000204130 | -0.051478 | 3.880571 | 0.94938  | 1 RUFY2        | K12898 |
| ENSG00000017260 | -0.042327 | 7.351279 | 0.94947  | 1 ATP2C1       | K01537 |
| ENSG00000198755 | 0.041482  | 9.771359 | 0.949561 | 1 RPL10A       | K02865 |
| ENSG00000236439 | -0.063415 | 3.128061 | 0.949634 | 1 RP11-175B9.3 | K02978 |
| ENSG00000223745 | 0.059267  | 3.125264 | 0.949634 | 1 RP4-717I23.3 | -      |
| ENSG00000185920 | 0.046366  | 3.560465 | 0.949837 | 1 PTCH1        | K06225 |
| ENSG00000135451 | -0.042505 | 6.73984  | 0.949847 | 1 TROAP        | -      |
| ENSG00000114698 | -0.05073  | 3.892421 | 0.949955 | 1 PLSCR4       | -      |
| ENSG00000014216 | 0.043033  | 5.984205 | 0.94996  | 1 CAPN1        | K01367 |
| ENSG00000135372 | -0.042527 | 6.569792 | 0.950034 | 1 NAT10        | K14521 |
| ENSG00000064961 | 0.041273  | 8.650652 | 0.950037 | 1 HMG20B       | -      |
| ENSG00000112419 | -0.054524 | 4.170861 | 0.950267 | 1 PHACTR2      | -      |
| ENSG00000157106 | -0.042511 | 6.396378 | 0.950301 | 1 SMG1         | K08873 |
| ENSG00000136153 | -0.040944 | 9.12813  | 0.950356 | 1 LMO7         | K06084 |
| ENSG00000076356 | 0.047213  | 4.401337 | 0.950486 | 1 PLXNA2       | -      |
| ENSG00000122971 | 0.048626  | 4.177211 | 0.9505   | 1 ACADS        | K00248 |
| ENSG00000180739 | 0.061073  | 3.582365 | 0.950541 | 1 S1PR5        | K04295 |
| ENSG00000241839 | 0.053624  | 3.586141 | 0.950541 | 1 PLEKHO2      | -      |
| ENSG00000129559 | 0.042135  | 6.334399 | 0.950618 | 1 NEDD8        | K12158 |
| ENSG00000115414 | -0.092025 | 1.509396 | 0.950626 | 1 FN1          | K05717 |
| ENSG00000223546 | -0.092025 | 1.509396 | 0.950626 | 1 LINC00630    | -      |
| ENSG00000144357 | 0.046121  | 4.60252  | 0.95065  | 1 UBR3         | K11978 |

|                 |           |          |          |                |        |
|-----------------|-----------|----------|----------|----------------|--------|
| ENSG00000079739 | 0.040855  | 8.274733 | 0.950668 | 1 PGM1         | K01835 |
| ENSG00000095383 | 0.043294  | 5.312503 | 0.950767 | 1 TBC1D2       | -      |
| ENSG00000119314 | 0.04124   | 7.211033 | 0.950777 | 1 PTBP3        | K17844 |
| ENSG00000105221 | -0.041761 | 6.708741 | 0.950787 | 1 AKT2         | K04456 |
| ENSG00000086758 | 0.046067  | 5.196472 | 0.950797 | 1 HUWE1        | K10592 |
| ENSG00000160226 | 0.044672  | 3.926309 | 0.951067 | 1 C21orf2      | -      |
| ENSG00000111077 | 0.045474  | 5.320207 | 0.951082 | 1 TENC1        | K18080 |
| ENSG00000164111 | 0.040274  | 8.967193 | 0.951173 | 1 ANXA5        | K16646 |
| ENSG00000105854 | -0.040522 | 7.977666 | 0.951269 | 1 PON2         | K01045 |
| ENSG00000105519 | 0.053886  | 2.575363 | 0.95131  | 1 CAPS         | -      |
| ENSG00000128000 | 0.053886  | 2.575363 | 0.95131  | 1 ZNF780B      | K09228 |
| ENSG00000230699 | 0.053886  | 2.575363 | 0.95131  | 1 RP11-5407.1  | -      |
| ENSG00000134248 | -0.041031 | 7.01909  | 0.951335 | 1 LAMTOR5      | K16344 |
| ENSG00000147140 | -0.04013  | 9.052279 | 0.951365 | 1 NONO         | K13214 |
| ENSG00000078967 | 0.053246  | 4.203597 | 0.951409 | 1 UBE2D4       | K06689 |
| ENSG00000134909 | 0.053327  | 3.615071 | 0.951561 | 1 ARHGAP32     | -      |
| ENSG00000145349 | 0.053327  | 3.615071 | 0.951561 | 1 CAMK2D       | K04515 |
| ENSG00000145014 | 0.042413  | 4.632912 | 0.951665 | 1 TMEM44       | -      |
| ENSG00000126804 | 0.041417  | 6.107015 | 0.951843 | 1 ZBTB1        | K10488 |
| ENSG00000173065 | -0.051446 | 4.218718 | 0.951852 | 1 FAM222B      | -      |
| ENSG00000008513 | -0.052723 | 3.953156 | 0.951868 | 1 ST3GAL1      | -      |
| ENSG00000237973 | 0.041535  | 6.041931 | 0.95191  | 1 hsa-mir-6723 | K02256 |
| ENSG00000025293 | -0.040684 | 6.857198 | 0.951924 | 1 PHF20        | K18402 |
| ENSG00000166135 | 0.040424  | 5.81843  | 0.951935 | 1 HIF1AN       | K18055 |
| ENSG00000005884 | -0.039861 | 8.280772 | 0.951936 | 1 ITGA3        | K06482 |
| ENSG00000169964 | -0.06464  | 2.60833  | 0.951975 | 1 TMEM42       | -      |
| ENSG00000259431 | -0.050309 | 2.600655 | 0.951975 | 1 THTPA        | K05307 |
| ENSG00000130829 | 0.102624  | 1.528825 | 0.951983 | 1 DUSP9        | K18498 |
| ENSG00000132386 | 0.102624  | 1.528825 | 0.951983 | 1 SERPINF1     | K19614 |
| ENSG00000272106 | 0.102624  | 1.528825 | 0.951983 | 1 RP11-345P4.9 | -      |
| ENSG00000214719 | 0.070325  | 1.545766 | 0.951983 | 1 AC005562.1   | -      |
| ENSG00000159228 | 0.040709  | 6.576529 | 0.952033 | 1 CBR1         | K00079 |
| ENSG00000198034 | 0.039334  | 10.89049 | 0.952077 | 1 RPS4X        | K02987 |
| ENSG00000205485 | -0.046489 | 3.961554 | 0.95213  | 1 AC004980.7   | K09228 |
| ENSG00000162851 | 0.043537  | 5.235422 | 0.952133 | 1 TFB2M        | K17653 |
| ENSG00000103932 | -0.043154 | 5.561273 | 0.952145 | 1 RPAP1        | K09228 |
| ENSG00000132424 | 0.040297  | 6.943073 | 0.95215  | 1 PNISR        | K13170 |
| ENSG00000146918 | 0.040192  | 7.052861 | 0.952179 | 1 NCAPG2       | K11492 |
| ENSG00000104343 | -0.041387 | 5.656495 | 0.952202 | 1 UBE2W        | K10688 |
| ENSG00000228474 | 0.041395  | 6.119687 | 0.952258 | 1 OST4         | -      |
| ENSG00000180957 | 0.045874  | 4.652212 | 0.952318 | 1 PITPNB       | -      |
| ENSG00000104687 | -0.040467 | 6.732032 | 0.952329 | 1 GSR          | K00383 |
| ENSG00000156599 | -0.040626 | 6.122648 | 0.952375 | 1 ZDHHC5       | -      |
| ENSG00000197111 | -0.039366 | 8.496574 | 0.952458 | 1 PCBP2        | K13162 |
| ENSG00000166166 | -0.045174 | 4.656145 | 0.952479 | 1 TRMT61A      | K07442 |
| ENSG00000130810 | -0.053733 | 3.64154  | 0.95254  | 1 PPAN         | K14859 |
| ENSG00000163466 | -0.039564 | 7.613763 | 0.952642 | 1 ARPC2        | K05758 |
| ENSG00000182362 | 0.042328  | 4.667844 | 0.952797 | 1 YBEY         | -      |
| ENSG00000177600 | 0.038633  | 9.523316 | 0.953067 | 1 RPLP2        | K02943 |
| ENSG00000075303 | 0.041615  | 4.999391 | 0.953098 | 1 SLC25A40     | K15119 |
| ENSG00000204186 | -0.045155 | 3.665801 | 0.95317  | 1 ZDBF2        | K11447 |
| ENSG00000011451 | -0.043317 | 5.270031 | 0.953192 | 1 WIZ          | -      |
| ENSG00000104290 | -0.046245 | 3.23869  | 0.953203 | 1 FZD3         | K02329 |
| ENSG00000141425 | 0.039871  | 6.452291 | 0.953203 | 1 RPRD1A       | K15559 |
| ENSG00000164951 | -0.040535 | 6.2129   | 0.953228 | 1 PDP1         | -      |
| ENSG00000214756 | -0.115991 | 1.585857 | 0.953267 | 1 METTL12      | K12606 |
| ENSG00000262050 | -0.115991 | 1.585857 | 0.953267 | 1 RP11-74E22.3 | -      |
| ENSG00000268713 | -0.115991 | 1.585857 | 0.953267 | 1 CTC-444N24.8 | -      |

|                 |           |          |          |                 |        |
|-----------------|-----------|----------|----------|-----------------|--------|
| ENSG00000237846 | 0.09992   | 1.58844  | 0.953267 | 1 RP11-216M21.1 | -      |
| ENSG00000205937 | -0.039128 | 7.474505 | 0.953267 | 1 RNPS1         | K14325 |
| ENSG00000113648 | -0.038841 | 8.045962 | 0.953281 | 1 H2AFY         | K11251 |
| ENSG00000131043 | -0.043151 | 5.147966 | 0.953319 | 1 AAR2          | K13205 |
| ENSG00000213639 | -0.038777 | 7.925064 | 0.95342  | 1 PPP1CB        | K06269 |
| ENSG00000107779 | 0.040563  | 5.695161 | 0.953464 | 1 BMPR1A        | K04673 |
| ENSG00000069966 | 0.043391  | 5.281261 | 0.953603 | 1 GNB5          | K04539 |
| ENSG00000146054 | -0.049227 | 4.008655 | 0.953641 | 1 TRIM7         | K12000 |
| ENSG00000135387 | 0.038174  | 8.974175 | 0.95373  | 1 CAPRIN1       | K18743 |
| ENSG00000104731 | 0.040943  | 5.403403 | 0.953748 | 1 KLHDC4        | -      |
| ENSG00000100083 | 0.043776  | 5.16381  | 0.953874 | 1 GGA1          | K12404 |
| ENSG00000136111 | 0.040281  | 5.957626 | 0.95391  | 1 TBC1D4        | K17902 |
| ENSG00000107643 | -0.047463 | 4.283163 | 0.953949 | 1 MAPK8         | K04440 |
| ENSG00000167600 | -0.047463 | 4.283163 | 0.953949 | 1 CYP2S1        | K07420 |
| ENSG00000164162 | -0.054179 | 3.261897 | 0.954017 | 1 ANAPC10       | K03357 |
| ENSG00000186814 | 0.048099  | 3.264358 | 0.954017 | 1 ZSCAN30       | K09230 |
| ENSG00000259494 | -0.042411 | 4.704022 | 0.954028 | 1 MRPL46        | K17427 |
| ENSG00000096093 | 0.038842  | 3.691961 | 0.954085 | 1 EFHC1         | K11545 |
| ENSG00000130881 | 0.038842  | 3.691961 | 0.954085 | 1 LRP3          | -      |
| ENSG00000008952 | -0.038517 | 7.280298 | 0.954158 | 1 SEC62         | K12275 |
| ENSG00000120656 | -0.042031 | 4.710734 | 0.954178 | 1 TAF12         | K03126 |
| ENSG00000114388 | -0.047903 | 4.030272 | 0.954361 | 1 NPRL2         | -      |
| ENSG00000176974 | -0.039246 | 6.299511 | 0.954409 | 1 SHMT1         | K00600 |
| ENSG00000220785 | 0.047982  | 3.282504 | 0.954414 | 1 MTMR9LP       | K18084 |
| ENSG00000162076 | 0.038241  | 7.127216 | 0.954488 | 1 FLYWCH2       | -      |
| ENSG00000011132 | -0.046389 | 4.30106  | 0.954542 | 1 APBA3         | -      |
| ENSG00000112584 | 0.049648  | 4.034603 | 0.954597 | 1 FAM120B       | -      |
| ENSG00000112699 | -0.039124 | 5.980584 | 0.954598 | 1 GMDS          | K01711 |
| ENSG00000138138 | 0.038204  | 7.04457  | 0.954602 | 1 ATAD1         | -      |
| ENSG00000182108 | -0.055943 | 3.713533 | 0.954676 | 1 DEXI          | -      |
| ENSG00000204822 | -0.043024 | 3.293325 | 0.954804 | 1 MRPL53        | K17434 |
| ENSG00000250899 | -0.043024 | 3.293325 | 0.954804 | 1 RP11-253E3.3  | -      |
| ENSG00000170412 | 0.04126   | 5.19887  | 0.954946 | 1 GPRC5C        | K04620 |
| ENSG00000069329 | -0.037904 | 7.205031 | 0.954964 | 1 VPS35         | K18468 |
| ENSG00000171174 | 0.052727  | 2.688559 | 0.955043 | 1 RBKS          | K00852 |
| ENSG00000065518 | -0.038045 | 6.835488 | 0.955152 | 1 NDUFB4        | K03960 |
| ENSG00000090565 | 0.040404  | 5.836966 | 0.95518  | 1 RAB11FIP3     | K12485 |
| ENSG00000184674 | -0.03796  | 5.839158 | 0.955247 | 1 GSTT1         | K00799 |
| ENSG00000169249 | -0.045988 | 4.062102 | 0.955288 | 1 ZRSR2         | -      |
| ENSG00000167186 | -0.04083  | 4.059421 | 0.955288 | 1 COQ7          | K06134 |
| ENSG00000131351 | 0.042616  | 4.552947 | 0.955327 | 1 HAUS8         | K16591 |
| ENSG00000124226 | 0.03796   | 6.596148 | 0.955346 | 1 RNF114        | K15697 |
| ENSG00000119401 | -0.039634 | 5.210876 | 0.95536  | 1 TRIM32        | K10607 |
| ENSG00000136930 | -0.037193 | 7.879062 | 0.955372 | 1 PSMB7         | K02739 |
| ENSG00000136238 | 0.036822  | 8.420482 | 0.955527 | 1 RAC1          | K04392 |
| ENSG00000114423 | 0.052129  | 3.738523 | 0.955534 | 1 CBLB          | K04707 |
| ENSG00000177879 | 0.037087  | 7.621526 | 0.955555 | 1 AP3S1         | K12399 |
| ENSG00000066422 | 0.038866  | 5.932706 | 0.95557  | 1 ZBTB11        | K10498 |
| ENSG00000170779 | 0.038865  | 5.668673 | 0.9556   | 1 CDCA4         | -      |
| ENSG00000105722 | 0.037868  | 6.457286 | 0.955627 | 1 ERF           | K09434 |
| ENSG00000134982 | 0.038864  | 5.572401 | 0.955693 | 1 APC           | K02085 |
| ENSG00000128050 | -0.036591 | 8.924934 | 0.955708 | 1 PAICS         | K01587 |
| ENSG00000122299 | -0.038279 | 6.296728 | 0.955827 | 1 ZC3H7A        | -      |
| ENSG00000188807 | -0.043817 | 4.344856 | 0.95587  | 1 TMEM201       | -      |
| ENSG00000204628 | 0.036116  | 10.66463 | 0.956015 | 1 GNB2L1        | K14753 |
| ENSG00000103769 | -0.036825 | 7.535819 | 0.956025 | 1 RAB11A        | K07904 |
| ENSG00000131381 | -0.038497 | 4.943704 | 0.956089 | 1 ZFYVE20       | K12481 |
| ENSG00000143947 | -0.036116 | 9.962841 | 0.956096 | 1 RPS27A        | K02977 |

|                 |           |          |          |                 |        |
|-----------------|-----------|----------|----------|-----------------|--------|
| ENSG00000144021 | -0.037234 | 6.850768 | 0.956121 | 1 CIAO1         | -      |
| ENSG00000170142 | -0.037419 | 6.646656 | 0.956133 | 1 UBE2E1        | K06689 |
| ENSG00000121716 | 0.065737  | 2.735018 | 0.956163 | 1 PILRB         | K15411 |
| ENSG00000065325 | 0.038864  | 5.587075 | 0.956165 | 1 GLP2R         | K04582 |
| ENSG00000141252 | 0.042081  | 4.774262 | 0.956172 | 1 VPS53         | K02927 |
| ENSG00000130770 | 0.036878  | 7.047883 | 0.95621  | 1 ATP1F1        | -      |
| ENSG00000070081 | -0.037589 | 6.330359 | 0.956368 | 1 NUCB2         | -      |
| ENSG00000175309 | -0.042831 | 4.36201  | 0.956416 | 1 PHYKPL        | K18202 |
| ENSG00000175166 | 0.035949  | 8.608986 | 0.956532 | 1 PSMD2         | K03028 |
| ENSG00000100324 | 0.038858  | 4.788629 | 0.956576 | 1 TAB1          | K04403 |
| ENSG00000101350 | 0.038865  | 5.70276  | 0.95662  | 1 KIF3B         | K10394 |
| ENSG00000166173 | -0.04541  | 3.775541 | 0.956628 | 1 LARP6         | K18733 |
| ENSG00000176700 | -0.056995 | 3.354895 | 0.956658 | 1 SCAND2P       | K09230 |
| ENSG00000213638 | -0.056995 | 3.354895 | 0.956658 | 1 ADAT3         | K15442 |
| ENSG00000169762 | -0.048542 | 3.35044  | 0.956658 | 1 TAPT1         | -      |
| ENSG00000095564 | 0.036941  | 6.510694 | 0.956685 | 1 BTAF1         | K15192 |
| ENSG00000152894 | -0.036826 | 6.049072 | 0.95671  | 1 PTPRK         | K06776 |
| ENSG00000152944 | 0.037669  | 6.197646 | 0.956843 | 1 MED21         | K15152 |
| ENSG00000163719 | -0.044609 | 4.604807 | 0.956888 | 1 MTMR14        | K18086 |
| ENSG00000171848 | -0.036252 | 7.2475   | 0.956937 | 1 RRM2          | K10808 |
| ENSG00000250208 | -0.045994 | 4.381097 | 0.956948 | 1 FZD10-AS1     | -      |
| ENSG00000108963 | 0.038858  | 4.80127  | 0.956974 | 1 DPH1          | K07561 |
| ENSG00000081386 | 0.047439  | 3.369959 | 0.95701  | 1 ZNF510        | K09228 |
| ENSG00000142459 | -0.039119 | 5.13054  | 0.957093 | 1 EVI5L         | K09228 |
| ENSG00000156467 | 0.035466  | 8.495069 | 0.957155 | 1 UQCRB         | K00417 |
| ENSG00000103091 | -0.03942  | 4.978894 | 0.957157 | 1 WDR59         | -      |
| ENSG00000100335 | -0.036473 | 6.647972 | 0.95728  | 1 MIEF1         | -      |
| ENSG00000100441 | 0.038861  | 5.136645 | 0.957301 | 1 KHNYN         | -      |
| ENSG00000198113 | 0.037309  | 5.81998  | 0.957336 | 1 TOR4A         | K15696 |
| ENSG00000132356 | 0.035714  | 7.383264 | 0.957372 | 1 PRKAA1        | K07198 |
| ENSG00000156860 | -0.041009 | 5.141765 | 0.957405 | 1 FBRS          | -      |
| ENSG00000022567 | 0.038864  | 5.633761 | 0.957523 | 1 SLC45A4       | K15378 |
| ENSG00000110801 | 0.038863  | 5.412701 | 0.957602 | 1 PSMD9         | K06693 |
| ENSG00000174516 | 0.043865  | 4.140421 | 0.957652 | 1 PELI3         | K11964 |
| ENSG00000051341 | -0.039122 | 5.532196 | 0.957677 | 1 POLQ          | K02349 |
| ENSG00000052749 | 0.036275  | 6.08391  | 0.957748 | 1 RRP12         | K14794 |
| ENSG00000173786 | -0.09832  | 1.750637 | 0.957778 | 1 CNP           | K01121 |
| ENSG00000251795 | -0.09832  | 1.750637 | 0.957778 | 1 SNORA66       | -      |
| ENSG00000123104 | 0.03886   | 5.000769 | 0.95784  | 1 ITPR2         | K04959 |
| ENSG00000159459 | 0.03886   | 5.006238 | 0.957951 | 1 UBR1          | K10625 |
| ENSG00000196639 | -0.053642 | 3.405371 | 0.958034 | 1 HRH1          | K04149 |
| ENSG00000101158 | 0.035081  | 7.53429  | 0.958046 | 1 NELFCD        | K15181 |
| ENSG00000050748 | -0.036113 | 6.358424 | 0.958115 | 1 MAPK9         | K04440 |
| ENSG00000103353 | 0.035022  | 6.099984 | 0.958222 | 1 UBF1          | -      |
| ENSG00000185787 | -0.03482  | 7.783798 | 0.958312 | 1 MORF4L1       | K11339 |
| ENSG00000164347 | -0.035671 | 6.504186 | 0.958442 | 1 GFM2          | K02355 |
| ENSG00000102098 | -0.037981 | 4.659584 | 0.958484 | 1 SCML2         | K11465 |
| ENSG00000162437 | -0.036116 | 6.183651 | 0.958485 | 1 RAVR2         | -      |
| ENSG00000169895 | -0.03503  | 7.143729 | 0.958511 | 1 SYAP1         | K12581 |
| ENSG00000138085 | 0.036183  | 6.033909 | 0.958585 | 1 ATRAID        | -      |
| ENSG00000198690 | -0.041098 | 3.850358 | 0.958663 | 1 FAN1          | K15363 |
| ENSG00000166529 | -0.050059 | 2.82147  | 0.958733 | 1 ZSCAN21       | K09230 |
| ENSG00000198142 | -0.034617 | 7.466121 | 0.95876  | 1 SOWAHC        | K12581 |
| ENSG00000179743 | -0.067834 | 1.78772  | 0.958772 | 1 RP11-169K16.9 | -      |
| ENSG00000183569 | -0.067834 | 1.78772  | 0.958772 | 1 SERHL2        | K04613 |
| ENSG00000268471 | -0.067834 | 1.78772  | 0.958772 | 1 MIR4453       | -      |
| ENSG00000197951 | 0.065636  | 1.768122 | 0.958772 | 1 ZNF71         | K09228 |
| ENSG00000234753 | 0.065636  | 1.768122 | 0.958772 | 1 RP11-328M4.2  | -      |

|                 |           |          |          |                  |        |
|-----------------|-----------|----------|----------|------------------|--------|
| ENSG00000165891 | -0.039108 | 4.182843 | 0.958839 | 1 E2F7           | K09391 |
| ENSG00000105976 | -0.03419  | 8.264499 | 0.958848 | 1 MET            | K05099 |
| ENSG00000100353 | 0.034046  | 8.272427 | 0.958959 | 1 EIF3D          | K03251 |
| ENSG00000004455 | -0.034047 | 8.416994 | 0.958963 | 1 AK2            | K00939 |
| ENSG00000130725 | 0.034799  | 6.754019 | 0.959011 | 1 UBE2M          | K10579 |
| ENSG00000108599 | -0.038327 | 5.581561 | 0.959112 | 1 AKAP10         | K16526 |
| ENSG00000146576 | -0.046342 | 3.865545 | 0.959143 | 1 C7orf26        | -      |
| ENSG00000117419 | 0.035301  | 6.208357 | 0.959206 | 1 ERI3           | K18418 |
| ENSG00000136448 | 0.034348  | 7.087113 | 0.959252 | 1 NMT1           | -      |
| ENSG00000136811 | -0.035194 | 5.975722 | 0.959262 | 1 ODF2           | K16479 |
| ENSG00000062485 | 0.033893  | 7.947482 | 0.959277 | 1 CS             | K01647 |
| ENSG00000197603 | -0.033984 | 5.79562  | 0.959292 | 1 C5orf42        | K16480 |
| ENSG00000006757 | -0.036164 | 4.693864 | 0.959439 | 1 PNPLA4         | K11157 |
| ENSG00000151148 | -0.038473 | 4.889999 | 0.959449 | 1 UBE3B          | K10588 |
| ENSG00000076043 | -0.034653 | 6.579021 | 0.959577 | 1 REXO2          | K13288 |
| ENSG00000105327 | 0.038846  | 3.882443 | 0.959611 | 1 BBC3           | K10132 |
| ENSG00000156463 | 0.038836  | 3.456559 | 0.959637 | 1 SH3RF2         | K12171 |
| ENSG00000164938 | 0.038836  | 3.456559 | 0.959637 | 1 TP53INP1       | K15310 |
| ENSG00000166415 | 0.091065  | 1.804928 | 0.95972  | 1 WDR72          | -      |
| ENSG00000213963 | 0.091065  | 1.804928 | 0.95972  | 1 AC074286.1     | -      |
| ENSG00000182195 | 0.064674  | 1.81874  | 0.95972  | 1 LDOC1          | -      |
| ENSG00000153922 | -0.036454 | 6.153784 | 0.959729 | 1 CHD1           | K11367 |
| ENSG00000172053 | 0.033759  | 7.272718 | 0.959826 | 1 QARS           | K01886 |
| ENSG00000108292 | -0.033946 | 7.103168 | 0.959865 | 1 MLLT6          | -      |
| ENSG00000109920 | 0.033903  | 6.95193  | 0.959909 | 1 FNBP4          | -      |
| ENSG00000166946 | 0.03496   | 5.49476  | 0.959931 | 1 CCNDBP1        | -      |
| ENSG00000114861 | -0.037056 | 4.220947 | 0.959961 | 1 FOXP1          | -      |
| ENSG00000155096 | 0.033497  | 7.489829 | 0.96     | 1 AZIN1          | -      |
| ENSG00000197958 | 0.03281   | 9.89973  | 0.960114 | 1 RPL12          | K02870 |
| ENSG00000271912 | -0.058892 | 2.876495 | 0.960136 | 1 RP11-661A12.14 | -      |
| ENSG00000233426 | -0.043346 | 4.496301 | 0.96019  | 1 EIF3FP3        | K03249 |
| ENSG00000180098 | 0.034942  | 4.495817 | 0.96019  | 1 TRNAU1AP       | -      |
| ENSG00000117448 | 0.033507  | 7.033543 | 0.96032  | 1 AKR1A1         | K00002 |
| ENSG00000122778 | -0.035667 | 5.63195  | 0.960521 | 1 KIAA1549       | K17985 |
| ENSG00000196646 | -0.045598 | 2.893945 | 0.960582 | 1 ZNF136         | K09228 |
| ENSG00000132128 | 0.033681  | 6.404399 | 0.960775 | 1 LRRC41         | K10347 |
| ENSG00000166747 | 0.034289  | 5.849183 | 0.960801 | 1 APIG1          | K12391 |
| ENSG00000131473 | 0.038837  | 3.503722 | 0.960834 | 1 ACLY           | K01648 |
| ENSG00000103978 | 0.034067  | 6.194646 | 0.960859 | 1 TMEM87A        | -      |
| ENSG00000149187 | 0.03298   | 7.068273 | 0.960931 | 1 CELF1          | K13207 |
| ENSG00000124222 | -0.033617 | 6.487185 | 0.960958 | 1 STX16          | K08489 |
| ENSG00000079616 | -0.033455 | 6.60268  | 0.961001 | 1 KIF22          | K10403 |
| ENSG00000177614 | 0.050677  | 2.914809 | 0.961019 | 1 PGBD5          | -      |
| ENSG00000236144 | 0.050677  | 2.914809 | 0.961019 | 1 AD000090.2     | -      |
| ENSG00000132005 | -0.039609 | 4.2604   | 0.961024 | 1 RFX1           | K09173 |
| ENSG00000101935 | -0.036406 | 5.27116  | 0.961073 | 1 AMMECR1        | -      |
| ENSG00000138376 | -0.042236 | 3.935948 | 0.961169 | 1 BARD1          | K10683 |
| ENSG00000196544 | -0.037462 | 4.532716 | 0.961212 | 1 C17orf59       | -      |
| ENSG00000143149 | 0.033155  | 6.527896 | 0.961259 | 1 ALDH9A1        | K00149 |
| ENSG00000182628 | -0.033422 | 5.867981 | 0.96126  | 1 SKA2           | -      |
| ENSG00000111846 | 0.03463   | 5.960436 | 0.961262 | 1 GCNT2          | K00742 |
| ENSG00000023228 | -0.033047 | 6.731647 | 0.96134  | 1 NDUFS1         | K03934 |
| ENSG00000136682 | 0.043422  | 4.273387 | 0.961365 | 1 CBWD2          | -      |
| ENSG00000049239 | 0.038852  | 4.275691 | 0.961365 | 1 H6PD           | K13937 |
| ENSG00000164830 | 0.034033  | 5.771015 | 0.961379 | 1 OXR1           | -      |
| ENSG00000106605 | -0.03338  | 6.370142 | 0.961413 | 1 BLVRA          | K00214 |
| ENSG00000111670 | -0.033179 | 6.534311 | 0.961425 | 1 GNPTAB         | K08239 |
| ENSG00000073969 | -0.037586 | 4.960699 | 0.961445 | 1 NSF            | K06027 |

|                 |           |          |          |                 |        |
|-----------------|-----------|----------|----------|-----------------|--------|
| ENSG00000198339 | 0.063779  | 1.867642 | 0.961491 | 1 HIST1H4I      | K11254 |
| ENSG00000155438 | -0.033245 | 6.307855 | 0.961671 | 1 NIFK          | K14838 |
| ENSG00000071462 | 0.038852  | 4.284721 | 0.961701 | 1 WBSCR22       | K19306 |
| ENSG00000253729 | 0.031457  | 9.518973 | 0.961814 | 1 PRKDC         | K06642 |
| ENSG00000211459 | 0.031322  | 11.31324 | 0.961824 | 1 MT-RNR1       | -      |
| ENSG00000089127 | -0.034857 | 5.681492 | 0.961836 | 1 OAS1          | K14216 |
| ENSG00000221829 | 0.034097  | 5.790165 | 0.961857 | 1 FANCG         | K10894 |
| ENSG00000144504 | 0.03882   | 2.943906 | 0.961863 | 1 ANKMY1        | K14165 |
| ENSG00000120832 | 0.032463  | 4.785477 | 0.961942 | 1 MTERFD3       | K15031 |
| ENSG00000051596 | -0.032674 | 5.690862 | 0.962089 | 1 THOC3         | K12880 |
| ENSG00000173020 | -0.034343 | 5.99235  | 0.962095 | 1 ADRBK1        | K00910 |
| ENSG00000133112 | 0.030988  | 11.13426 | 0.96224  | 1 TPT1          | -      |
| ENSG00000055070 | -0.032285 | 6.644047 | 0.962369 | 1 SZRD1         | -      |
| ENSG00000196365 | 0.031196  | 8.42224  | 0.962379 | 1 LONP1         | K08675 |
| ENSG00000051108 | -0.032144 | 6.766303 | 0.962396 | 1 HERPUD1       | K14027 |
| ENSG00000143324 | 0.032404  | 6.350049 | 0.962397 | 1 XPR1          | -      |
| ENSG00000147889 | -0.031139 | 8.592661 | 0.962446 | 1 CDKN2A        | K06621 |
| ENSG00000115234 | -0.032297 | 6.258882 | 0.962565 | 1 SNX17         | K17929 |
| ENSG00000197818 | 0.038839  | 3.579055 | 0.962766 | 1 SLC9A8        | K14724 |
| ENSG00000173465 | 0.031634  | 5.605207 | 0.962884 | 1 SSSCA1        | -      |
| ENSG00000141385 | -0.031671 | 6.77594  | 0.962961 | 1 AFG3L2        | K08956 |
| ENSG00000146701 | -0.035754 | 4.826501 | 0.96297  | 1 MDH2          | K00026 |
| ENSG00000168612 | 0.046213  | 3.589906 | 0.963026 | 1 ZSWIM1        | K17985 |
| ENSG00000181896 | -0.035098 | 3.587552 | 0.963026 | 1 ZNF101        | K09228 |
| ENSG00000110628 | -0.032413 | 4.831117 | 0.963081 | 1 SLC22A18      | K08214 |
| ENSG00000179010 | 0.030569  | 8.531177 | 0.96311  | 1 MRFAP1        | -      |
| ENSG00000146166 | 0.085944  | 1.948312 | 0.963112 | 1 LGSN          | -      |
| ENSG00000115255 | -0.033148 | 5.197784 | 0.963131 | 1 REEP6         | K17279 |
| ENSG00000168876 | -0.033148 | 5.197784 | 0.963131 | 1 ANKRD49       | -      |
| ENSG00000242802 | -0.033148 | 5.197784 | 0.963131 | 1 AP5Z1         | K19025 |
| ENSG00000055917 | 0.031632  | 6.409562 | 0.963254 | 1 PUM2          | K17943 |
| ENSG00000244462 | -0.031243 | 6.983191 | 0.963263 | 1 RBM12         | -      |
| ENSG00000164134 | -0.031434 | 6.747656 | 0.96328  | 1 NAA15         | K00670 |
| ENSG00000092847 | 0.033489  | 5.035969 | 0.963349 | 1 AGO1          | K11593 |
| ENSG00000088179 | -0.040281 | 4.617344 | 0.963363 | 1 PTPN4         | K18037 |
| ENSG00000172985 | 0.035256  | 4.615161 | 0.963363 | 1 SH3RF3        | K12171 |
| ENSG00000188846 | -0.030173 | 9.602993 | 0.963391 | 1 RPL14         | K02875 |
| ENSG00000216285 | 0.049949  | 3.004997 | 0.963447 | 1 RP11-490H24.5 | K01834 |
| ENSG00000184436 | -0.033271 | 5.745827 | 0.963479 | 1 THAP7         | -      |
| ENSG00000165632 | -0.04855  | 3.609484 | 0.963536 | 1 TAF3          | K14650 |
| ENSG00000113595 | 0.03884   | 3.608121 | 0.963536 | 1 TRIM23        | K07963 |
| ENSG00000166803 | -0.030547 | 7.605502 | 0.963618 | 1 KIAA0101      | -      |
| ENSG00000164944 | -0.03125  | 6.610787 | 0.963667 | 1 KIAA1429      | -      |
| ENSG00000198730 | -0.030784 | 6.14329  | 0.963704 | 1 CTR9          | K15176 |
| ENSG00000076685 | 0.032495  | 5.374093 | 0.963718 | 1 NT5C2         | K01081 |
| ENSG00000058063 | 0.032786  | 4.859866 | 0.963838 | 1 ATP11B        | K01530 |
| ENSG00000176485 | 0.03184   | 5.967458 | 0.963855 | 1 PLA2G16       | K16817 |
| ENSG00000104213 | -0.076402 | 1.989458 | 0.963872 | 1 PDGFRL        | -      |
| ENSG00000204271 | -0.054092 | 1.977338 | 0.963872 | 1 SPIN3         | -      |
| ENSG00000197579 | -0.030878 | 5.761272 | 0.963882 | 1 TOPORS        | K10631 |
| ENSG00000111530 | -0.030032 | 8.083837 | 0.963989 | 1 CAND1         | K17263 |
| ENSG00000130939 | 0.033587  | 5.062463 | 0.964004 | 1 UBE4B         | K10597 |
| ENSG00000130414 | -0.031207 | 6.392764 | 0.964016 | 1 NDUFA10       | K03954 |
| ENSG00000116809 | 0.033518  | 4.053384 | 0.964133 | 1 ZBTB17        | K10500 |
| ENSG00000137770 | 0.030504  | 5.979323 | 0.964149 | 1 CTDSPL2       | K17616 |
| ENSG00000116874 | 0.030987  | 5.069017 | 0.964187 | 1 WARS2         | K01867 |
| ENSG00000138411 | -0.048529 | 3.034458 | 0.964191 | 1 HECW2         | K12168 |
| ENSG00000168575 | 0.038824  | 3.03233  | 0.964191 | 1 SLC20A2       | -      |



|                 |           |          |          |            |              |
|-----------------|-----------|----------|----------|------------|--------------|
| ENSG00000162302 | -0.032121 | 5.398244 | 0.964306 | 1 RPS6KA4  | K16510       |
| ENSG00000119185 | -0.03043  | 5.987527 | 0.964343 | 1 ITGB1BP1 | -            |
| ENSG00000213246 | 0.030812  | 6.255037 | 0.964435 | 1 SUPT4H1  | K15171       |
| ENSG00000204120 | -0.030329 | 5.668622 | 0.964444 | 1 GIGYF2   | K18730       |
| ENSG00000149743 | 0.045924  | 3.647046 | 0.964516 | 1 TRPT1    | K10669       |
| ENSG00000165886 | 0.038841  | 3.650649 | 0.964516 | 1 UBTD1    | -            |
| ENSG00000099795 | 0.030364  | 6.177164 | 0.964562 | 1 NDUFB7   | K03963       |
| ENSG00000139370 | -0.036398 | 4.401922 | 0.964623 | 1 SLC15A4  | K14638       |
| ENSG00000184203 | -0.029987 | 7.132233 | 0.964653 | 1 PPP1R2   | K16833       |
| ENSG00000112062 | -0.030845 | 6.007431 | 0.964817 | 1 MAPK14   | K04441       |
| ENSG00000197265 | 0.030645  | 5.420918 | 0.964875 | 1 GTF2E2   | K03137       |
| ENSG00000168502 | 0.031201  | 6.104444 | 0.964924 | 1 SOGA2    | -            |
| ENSG00000068078 | -0.032911 | 5.424007 | 0.964945 | 1 FGFR3    | K05094       |
| ENSG00000006607 | 0.032985  | 4.90741  | 0.964968 | 1 FARP2    | K06082       |
| ENSG00000070476 | -0.039107 | 4.090625 | 0.965023 | 1 ZXDC     | -            |
| ENSG00000108590 | 0.038849  | 4.092423 | 0.965023 | 1 MED31    | K15153       |
| ENSG00000175182 | 0.038849  | 4.092423 | 0.965023 | 1 FAM131A  | -            |
| ENSG00000069943 | 0.035428  | 4.68503  | 0.965058 | 1 PIGB     | K05286       |
| ENSG00000134444 | 0.032006  | 4.686751 | 0.965058 | 1 KIAA1468 | -            |
| ENSG00000166169 | -0.034365 | 4.912    | 0.965067 | 1 POLL     | K03512       |
| ENSG00000124214 | 0.029558  | 7.044864 | 0.965111 | 1 STAU1    | K17597       |
| ENSG00000102265 | 0.02899   | 7.958431 | 0.965242 | 1 TIMP1    | K16451       |
| ENSG00000205423 | -0.056216 | 3.082025 | 0.965251 | 1 CNEP1R1  | -            |
| ENSG00000229320 | -0.056216 | 3.082025 | 0.965251 | 1 KRT8P12  | K07605       |
| ENSG00000110925 | 0.033032  | 4.919055 | 0.965264 | 1 CSRNP2   | K17494       |
| ENSG00000168056 | -0.029432 | 7.169874 | 0.965296 | 1 LTBP3    | K08023       |
| ENSG00000167785 | -0.094154 | 2.04447  | 0.965301 | 1 ZNF558   | K09228       |
| ENSG00000131480 | 0.060745  | 2.048187 | 0.965301 | 1 AOC2     | K00276       |
| ENSG00000232150 | 0.060745  | 2.048187 | 0.965301 | 1 ST13P4   | K09560       |
| ENSG00000013374 | 0.029522  | 6.817208 | 0.965359 | 1 NUB1     | -            |
| ENSG00000165526 | -0.030658 | 4.927922 | 0.965458 | 1 RPUSD4   | -            |
| ENSG00000198060 | -0.030728 | 6.037783 | 0.965551 | 1          | 5-Mar K10660 |
| ENSG00000197050 | -0.044732 | 3.097211 | 0.965591 | 1 ZNF420   | K09228       |
| ENSG00000130202 | 0.029283  | 6.655626 | 0.965814 | 1 PVRL2    | K06531       |
| ENSG00000011405 | 0.030322  | 5.948404 | 0.96582  | 1 PIK3C2A  | K00923       |
| ENSG00000105993 | 0.028912  | 7.140603 | 0.96582  | 1 DNAJB6   | K09512       |
| ENSG00000013392 | 0.033782  | 4.125517 | 0.96587  | 1 RWDD2A   | K11447       |
| ENSG00000136636 | -0.029352 | 6.631728 | 0.965947 | 1 KCTD3    | K04613       |
| ENSG00000114646 | -0.069479 | 2.074961 | 0.965974 | 1 CSPG5    | K08116       |
| ENSG00000155097 | -0.028786 | 7.294938 | 0.965979 | 1 ATP6V1C1 | K02148       |
| ENSG00000105738 | 0.030821  | 4.458425 | 0.965989 | 1 SIPA1L3  | K17703       |
| ENSG00000058799 | 0.031395  | 5.14536  | 0.966    | 1 YIPF1    | -            |
| ENSG00000065054 | 0.028033  | 5.607007 | 0.966005 | 1 SLC9A3R2 | K13358       |
| ENSG00000159840 | 0.028327  | 7.642706 | 0.966203 | 1 ZYX      | K06273       |
| ENSG00000153443 | 0.03096   | 5.477143 | 0.966221 | 1 UBALD1   | -            |
| ENSG00000109089 | 0.028376  | 6.066982 | 0.966254 | 1 CDR2L    | -            |
| ENSG00000010322 | -0.029974 | 5.484023 | 0.96635  | 1 NISCH    | K18047       |
| ENSG00000100413 | -0.029974 | 5.484023 | 0.96635  | 1 POLR3H   | K03022       |
| ENSG00000092841 | -0.027789 | 9.238746 | 0.966364 | 1 MYL6     | K12751       |
| ENSG00000099968 | -0.029041 | 6.254876 | 0.966391 | 1 BCL2L13  | K15485       |
| ENSG00000181163 | 0.027569  | 11.0805  | 0.966412 | 1 NPM1     | K11276       |
| ENSG00000166794 | -0.027847 | 8.730685 | 0.966416 | 1 PPIB     | K03768       |
| ENSG00000158669 | -0.030641 | 5.62575  | 0.966418 | 1 AGPAT6   | K13506       |
| ENSG00000125630 | -0.028966 | 6.074688 | 0.966426 | 1 POLR1B   | K03002       |
| ENSG00000137947 | 0.029749  | 6.076766 | 0.966468 | 1 GTF2B    | K03124       |
| ENSG00000198258 | -0.028853 | 6.642304 | 0.96654  | 1 UBL5     | K13113       |
| ENSG00000134247 | -0.028819 | 6.624193 | 0.966603 | 1 PTGFRN   | K06729       |
| ENSG00000011275 | -0.030049 | 5.875474 | 0.966618 | 1 RNF216   | K11976       |

|                 |           |          |          |                 |        |
|-----------------|-----------|----------|----------|-----------------|--------|
| ENSG00000196466 | 0.060098  | 2.090001 | 0.966621 | 1 ZNF799        | K09228 |
| ENSG00000230629 | 0.060098  | 2.090001 | 0.966621 | 1 RPS23P8       | K02973 |
| ENSG00000161914 | 0.038778  | 2.101189 | 0.966621 | 1 ZNF653        | -      |
| ENSG00000235859 | 0.038778  | 2.101189 | 0.966621 | 1 AC006978.6    | K03066 |
| ENSG00000168476 | -0.031856 | 5.637248 | 0.966706 | 1 REEP4         | K17338 |
| ENSG00000169855 | 0.028526  | 6.087768 | 0.966722 | 1 ROBO1         | K06753 |
| ENSG00000157978 | 0.029116  | 5.176018 | 0.966723 | 1 LDLRAP1       | K12474 |
| ENSG00000181885 | 0.038843  | 3.745264 | 0.966748 | 1 CLDN7         | K06087 |
| ENSG00000108424 | -0.027601 | 8.580592 | 0.966761 | 1 KPNB1         | K14293 |
| ENSG00000163605 | -0.028816 | 5.99236  | 0.96683  | 1 PPP4R2        | K15425 |
| ENSG00000132388 | 0.028415  | 6.656058 | 0.966868 | 1 UBE2G1        | K10575 |
| ENSG00000147457 | -0.030755 | 5.508311 | 0.966919 | 1 CHMP7         | K15053 |
| ENSG00000131469 | -0.027291 | 9.423976 | 0.966936 | 1 RPL27         | K02901 |
| ENSG00000180530 | -0.02891  | 5.185781 | 0.966957 | 1 NRIP1         | K17965 |
| ENSG00000129315 | 0.028274  | 6.636792 | 0.96706  | 1 CCNT1         | K15188 |
| ENSG00000153201 | 0.027659  | 7.42874  | 0.967142 | 1 RANBP2        | K12172 |
| ENSG00000265681 | 0.027938  | 6.008227 | 0.967183 | 1 RPL17         | K02880 |
| ENSG00000132361 | -0.027613 | 7.610462 | 0.967187 | 1 CLUH          | K03255 |
| ENSG00000163541 | 0.02786   | 6.902899 | 0.967299 | 1 SUCLG1        | K01899 |
| ENSG00000177556 | -0.029194 | 5.796415 | 0.967454 | 1 ATOX1         | K07213 |
| ENSG00000177406 | 0.038828  | 3.175123 | 0.967496 | 1 RP11-218M22.1 | -      |
| ENSG00000160570 | 0.032491  | 4.791825 | 0.967526 | 1 DEDD2         | -      |
| ENSG00000082515 | 0.031272  | 5.535048 | 0.967528 | 1 MRPL22        | K02890 |
| ENSG00000243678 | -0.026921 | 8.273638 | 0.967698 | 1 NME1-NME2     | K00940 |
| ENSG00000157625 | 0.027884  | 5.809056 | 0.967751 | 1 TAB3          | K12793 |
| ENSG00000107566 | -0.027729 | 6.703334 | 0.967832 | 1 ERLIN1        | -      |
| ENSG00000183250 | -0.06334  | 2.155698 | 0.967844 | 1 C21orf67      | -      |
| ENSG00000136247 | -0.031738 | 5.226175 | 0.967861 | 1 ZDHHC4        | K18932 |
| ENSG00000244005 | -0.027884 | 6.525788 | 0.967865 | 1 NFS1          | K04487 |
| ENSG00000174306 | 0.032574  | 4.810702 | 0.96792  | 1 ZHX3          | -      |
| ENSG00000218336 | 0.027126  | 5.229609 | 0.967934 | 1 TENM3         | -      |
| ENSG00000129925 | 0.028201  | 6.043234 | 0.967992 | 1 TMEM8A        | -      |
| ENSG00000165458 | -0.026747 | 7.974258 | 0.968042 | 1 INPPL1        | K15909 |
| ENSG00000122515 | -0.028007 | 6.149487 | 0.968126 | 1 ZMIZ2         | -      |
| ENSG00000155229 | -0.02752  | 6.594103 | 0.968219 | 1 MMS19         | K15075 |
| ENSG00000064545 | 0.02753   | 6.413671 | 0.968228 | 1 TMEM161A      | -      |
| ENSG00000115839 | -0.028393 | 5.709421 | 0.968337 | 1 RAB3GAP1      | K18270 |
| ENSG00000127804 | -0.030311 | 5.838402 | 0.968378 | 1 METTL16       | -      |
| ENSG00000114982 | 0.027783  | 5.57424  | 0.968402 | 1 KANSL3        | K16719 |
| ENSG00000185519 | -0.060525 | 2.194439 | 0.968423 | 1 FAM131C       | -      |
| ENSG00000103671 | 0.031403  | 4.566032 | 0.968426 | 1 TRIP4         | K09228 |
| ENSG00000196182 | 0.029519  | 4.243712 | 0.968466 | 1 STK40         | K16312 |
| ENSG00000047315 | 0.026696  | 7.098646 | 0.968548 | 1 POLR2B        | K03010 |
| ENSG00000129128 | -0.028068 | 6.174594 | 0.968655 | 1 SPCS3         | K12948 |
| ENSG00000102316 | -0.026599 | 6.9317   | 0.968959 | 1 MAGED2        | -      |
| ENSG00000129103 | -0.026098 | 7.672614 | 0.968993 | 1 SUMF2         | K10408 |
| ENSG00000128923 | -0.030436 | 4.597505 | 0.969091 | 1 FAM63B        | K12581 |
| ENSG00000100603 | -0.026796 | 6.590015 | 0.969103 | 1 SNW1          | K06063 |
| ENSG00000143393 | 0.026729  | 6.440682 | 0.969166 | 1 PI4KB         | K00888 |
| ENSG00000119397 | -0.045143 | 3.257132 | 0.969202 | 1 CNTRL         | K16770 |
| ENSG00000166484 | 0.038845  | 3.858452 | 0.969263 | 1 MAPK7         | K04464 |
| ENSG00000132003 | -0.030505 | 5.100164 | 0.969324 | 1 ZSWIM4        | -      |
| ENSG00000168434 | 0.034325  | 4.287006 | 0.969424 | 1 COG7          | -      |
| ENSG00000168010 | -0.03386  | 3.871395 | 0.96944  | 1 ATG16L2       | K17890 |
| ENSG00000111203 | 0.029622  | 3.273837 | 0.969469 | 1 ITFG2         | -      |
| ENSG00000150477 | 0.057854  | 2.246098 | 0.969519 | 1 KIAA1328      | K12581 |
| ENSG00000101161 | 0.02606   | 6.777765 | 0.969604 | 1 PRPF6         | K12855 |
| ENSG00000198894 | 0.032801  | 3.873567 | 0.969616 | 1 CIPC          | -      |

|                 |           |          |          |            |        |
|-----------------|-----------|----------|----------|------------|--------|
| ENSG00000100823 | -0.025723 | 7.385328 | 0.969638 | 1 APEX1    | K10771 |
| ENSG00000160094 | 0.038832  | 3.28719  | 0.969732 | 1 ZNF362   | -      |
| ENSG00000141034 | -0.032002 | 5.121738 | 0.969775 | 1 GID4     | K01368 |
| ENSG00000109184 | -0.029787 | 5.487936 | 0.9698   | 1 DCUN1D4  | K17824 |
| ENSG00000161981 | -0.026944 | 5.910165 | 0.969908 | 1 SNRNP25  | K13153 |
| ENSG00000117139 | 0.024862  | 6.23478  | 0.969938 | 1 KDM5B    | K11446 |
| ENSG00000037897 | -0.03237  | 4.312031 | 0.969945 | 1 METTL1   | K03439 |
| ENSG00000112031 | 0.029979  | 4.315956 | 0.969945 | 1 MTRF1L   | K02835 |
| ENSG00000108861 | -0.02622  | 6.4774   | 0.96995  | 1 DUSP3    | K17614 |
| ENSG00000153885 | -0.026033 | 5.64866  | 0.969963 | 1 KCTD15   | -      |
| ENSG00000140534 | 0.027878  | 5.324607 | 0.969982 | 1 TICRR    | -      |
| ENSG00000071537 | 0.027184  | 5.498645 | 0.970028 | 1 SEL1L    | K14026 |
| ENSG00000141858 | 0.026784  | 6.03322  | 0.970064 | 1 SAMD1    | -      |
| ENSG00000102471 | -0.025618 | 7.015433 | 0.970072 | 1 NDFIP2   | -      |
| ENSG00000197136 | -0.025861 | 6.688537 | 0.970119 | 1 PCNXL3   | -      |
| ENSG00000119689 | -0.025715 | 6.672721 | 0.970315 | 1 DLST     | K00658 |
| ENSG00000125447 | -0.027828 | 4.926472 | 0.970349 | 1 GGA3     | K12404 |
| ENSG00000112992 | -0.032353 | 3.324092 | 0.970492 | 1 NNT      | K00323 |
| ENSG00000105372 | 0.057365  | 2.282619 | 0.970542 | 1 RPS19    | K02966 |
| ENSG00000104695 | 0.025233  | 6.77496  | 0.970612 | 1 PPP2CB   | K04382 |
| ENSG00000167112 | -0.026321 | 5.680644 | 0.970614 | 1 TRUB2    | -      |
| ENSG00000117280 | -0.026012 | 5.687468 | 0.970761 | 1 RAB7L1   | K07916 |
| ENSG00000115266 | 0.033045  | 3.932204 | 0.970791 | 1 APC2     | K02085 |
| ENSG00000165476 | 0.025531  | 6.30525  | 0.970796 | 1 REEP3    | K17338 |
| ENSG00000105464 | 0.034542  | 4.357168 | 0.970816 | 1 GRIN2D   | K05212 |
| ENSG00000129691 | -0.029559 | 4.950785 | 0.97084  | 1 ASH2L    | K14964 |
| ENSG00000131795 | -0.070604 | 2.314337 | 0.971028 | 1 RBM8A    | K12876 |
| ENSG00000171840 | -0.070604 | 2.314337 | 0.971028 | 1 NINJ2    | -      |
| ENSG00000157837 | -0.026758 | 5.378349 | 0.971031 | 1 SPPL3    | K09598 |
| ENSG00000135341 | 0.027639  | 5.555709 | 0.971172 | 1 MAP3K7   | K04427 |
| ENSG00000170325 | -0.030638 | 3.358671 | 0.971216 | 1 PRDM10   | -      |
| ENSG00000102302 | -0.029018 | 4.380976 | 0.971292 | 1 FGD1     | K05720 |
| ENSG00000168411 | 0.024849  | 6.55471  | 0.971312 | 1 RFWD3    | K15691 |
| ENSG00000214026 | 0.027697  | 5.56315  | 0.971329 | 1 MRPL23   | K02892 |
| ENSG00000085449 | -0.024425 | 5.563135 | 0.971329 | 1 WDFY1    | -      |
| ENSG00000132359 | 0.024813  | 6.550973 | 0.971361 | 1 RAP1GAP2 | K17708 |
| ENSG00000183597 | 0.030396  | 4.384755 | 0.971408 | 1 TANGO2   | -      |
| ENSG00000128708 | 0.0245    | 6.859729 | 0.971423 | 1 HAT1     | K11303 |
| ENSG00000008988 | -0.023565 | 9.766823 | 0.971426 | 1 RPS20    | K02969 |
| ENSG00000123154 | 0.038834  | 3.374358 | 0.971449 | 1 WDR83    | K13124 |
| ENSG00000065154 | -0.025911 | 5.571458 | 0.971483 | 1 OAT      | K00819 |
| ENSG00000086232 | -0.023884 | 8.030868 | 0.971502 | 1 EIF2AK1  | K16194 |
| ENSG00000170581 | -0.025463 | 5.208486 | 0.971519 | 1 STAT2    | K11221 |
| ENSG00000172432 | -0.024832 | 6.530075 | 0.971564 | 1 GTPBP2   | -      |
| ENSG00000131495 | 0.025856  | 6.215434 | 0.97157  | 1 NDUFA2   | K03946 |
| ENSG00000181929 | 0.024498  | 6.699315 | 0.971582 | 1 PRKAG1   | K07200 |
| ENSG00000198862 | 0.025321  | 5.868818 | 0.971628 | 1 LTN1     | -      |
| ENSG00000172175 | 0.024696  | 6.439665 | 0.971636 | 1 MALT1    | K07369 |
| ENSG00000183283 | -0.023845 | 7.824855 | 0.971651 | 1 DAZAP2   | -      |
| ENSG00000167123 | -0.024578 | 6.698287 | 0.971666 | 1 CERCAM   | -      |
| ENSG00000125686 | -0.02712  | 5.873984 | 0.97171  | 1 MED1     | K15144 |
| ENSG00000185591 | 0.024396  | 6.689149 | 0.971716 | 1 SP1      | K04684 |
| ENSG00000086589 | -0.024158 | 6.004031 | 0.971794 | 1 RBM22    | K12872 |
| ENSG00000095574 | 0.03327   | 3.98855  | 0.971879 | 1 IKZF5    | K09220 |
| ENSG00000160285 | 0.025039  | 6.127826 | 0.971934 | 1 LSS      | K01852 |
| ENSG00000099625 | -0.027708 | 3.997482 | 0.972028 | 1 C19orf26 | -      |
| ENSG00000137106 | 0.02379   | 7.126837 | 0.972061 | 1 GRHPR    | K00049 |
| ENSG00000167272 | -0.026267 | 5.755607 | 0.972103 | 1 POP5     | K03537 |

|                 |           |          |          |              |        |
|-----------------|-----------|----------|----------|--------------|--------|
| ENSG00000104368 | -0.036381 | 3.413309 | 0.972127 | 1 PLAT       | K01343 |
| ENSG00000172869 | 0.024881  | 5.240095 | 0.972162 | 1 DMXL1      | -      |
| ENSG00000197223 | 0.026547  | 4.428213 | 0.972198 | 1 C1D        | K12592 |
| ENSG00000229132 | -0.032569 | 4.011198 | 0.972321 | 1 EIF4A1P10  | K03257 |
| ENSG00000114631 | -0.023411 | 7.47261  | 0.972393 | 1 PODXL2     | K06818 |
| ENSG00000014641 | -0.023036 | 8.367597 | 0.972397 | 1 MDH1       | K00025 |
| ENSG00000001167 | 0.029146  | 4.767889 | 0.972471 | 1 NFYA       | K08064 |
| ENSG00000127838 | 0.02506   | 5.258544 | 0.972473 | 1 PNKD       | -      |
| ENSG00000132153 | 0.023604  | 6.846446 | 0.972525 | 1 DHX30      | K13185 |
| ENSG00000241685 | -0.023714 | 6.864058 | 0.972536 | 1 ARPC1A     | K05757 |
| ENSG00000148303 | -0.031497 | 4.03278  | 0.972608 | 1 RPL7A      | K02936 |
| ENSG00000131051 | -0.022883 | 8.301448 | 0.972609 | 1 RBM39      | K13091 |
| ENSG00000151498 | 0.028048  | 4.03483  | 0.972749 | 1 ACAD8      | K11538 |
| ENSG00000102606 | 0.026514  | 5.639925 | 0.972804 | 1 ARHGEF7    | K13710 |
| ENSG00000160284 | -0.046428 | 2.407357 | 0.97282  | 1 SPATC1L    | -      |
| ENSG00000213118 | -0.046428 | 2.407357 | 0.97282  | 1 CHCHD2P4   | K00901 |
| ENSG00000183048 | -0.026864 | 5.280205 | 0.972896 | 1 SLC25A10   | K13577 |
| ENSG00000165280 | -0.022509 | 8.655175 | 0.972945 | 1 VCP        | K13525 |
| ENSG00000136731 | 0.023273  | 6.815627 | 0.972955 | 1 UGGT1      | K11718 |
| ENSG00000159110 | -0.024314 | 5.065214 | 0.973068 | 1 IFNAR2     | K05131 |
| ENSG00000167323 | 0.023187  | 6.072195 | 0.973087 | 1 STIM1      | K16059 |
| ENSG00000119669 | -0.025951 | 5.485981 | 0.973129 | 1 IRF2BPL    | -      |
| ENSG00000111911 | -0.029208 | 5.073062 | 0.973205 | 1 HINT3      | K12581 |
| ENSG00000132661 | -0.027207 | 4.809367 | 0.973224 | 1 NXT1       | K14285 |
| ENSG00000148297 | 0.038798  | 2.428882 | 0.973234 | 1 MED22      | K15139 |
| ENSG00000198468 | 0.038798  | 2.428882 | 0.973234 | 1 FLVCR1-AS1 | -      |
| ENSG00000129083 | 0.022172  | 8.93276  | 0.973242 | 1 COPB1      | K17301 |
| ENSG0000013810  | -0.022951 | 7.045631 | 0.973288 | 1 TACC3      | K14283 |
| ENSG00000198887 | 0.025029  | 5.668663 | 0.973352 | 1 SMC5       | -      |
| ENSG00000163812 | 0.023308  | 5.669524 | 0.973352 | 1 ZDHHC3     | K18932 |
| ENSG00000136504 | -0.02347  | 5.305926 | 0.973364 | 1 KAT7       | K11307 |
| ENSG00000104231 | -0.023186 | 6.671441 | 0.973389 | 1 ZFAND1     | K07059 |
| ENSG00000135093 | -0.033047 | 3.47765  | 0.973391 | 1 USP30      | K11851 |
| ENSG00000179912 | -0.029447 | 4.075001 | 0.973434 | 1 R3HDM2     | -      |
| ENSG00000108591 | -0.024794 | 5.676364 | 0.973486 | 1 DRG2       | K06944 |
| ENSG00000175643 | -0.026353 | 4.82801  | 0.973546 | 1 RMI2       | K15365 |
| ENSG00000122482 | 0.023502  | 6.216608 | 0.973615 | 1 ZNF644     | -      |
| ENSG00000112715 | -0.022371 | 7.390058 | 0.973716 | 1 VEGFA      | K05448 |
| ENSG00000119929 | 0.023572  | 5.982782 | 0.973777 | 1 CUTC       | K06201 |
| ENSG00000168101 | 0.028513  | 4.097659 | 0.973829 | 1 NUDT16L1   | K16867 |
| ENSG00000185963 | -0.023528 | 5.986849 | 0.973848 | 1 BICD2      | K18739 |
| ENSG00000154518 | -0.022052 | 7.676713 | 0.973918 | 1 ATP5G3     | K02128 |
| ENSG00000130479 | -0.025403 | 5.701019 | 0.973922 | 1 MAP1S      | K10429 |
| ENSG00000155366 | 0.022087  | 7.43151  | 0.973924 | 1 RHOC       | K17504 |
| ENSG00000104691 | -0.022953 | 4.103278 | 0.973958 | 1 UBXN8      | -      |
| ENSG00000162065 | -0.022953 | 4.103278 | 0.973958 | 1 TBC1D24    | -      |
| ENSG00000169504 | 0.021832  | 7.919608 | 0.973978 | 1 CLIC4      | K05024 |
| ENSG00000154305 | -0.022872 | 6.237563 | 0.974004 | 1 MIA3       | -      |
| ENSG00000187824 | -0.058316 | 2.48033  | 0.974025 | 1 TMEM220    | -      |
| ENSG00000147862 | 0.02376   | 5.542594 | 0.974163 | 1 NFIB       | K09169 |
| ENSG00000122863 | 0.023847  | 6.249264 | 0.974209 | 1 CHST3      | K01020 |
| ENSG00000142655 | -0.027513 | 4.116023 | 0.974212 | 1 PEX14      | K02310 |
| ENSG00000166002 | 0.027456  | 4.538009 | 0.974231 | 1 SMCO4      | -      |
| ENSG00000120705 | -0.021516 | 8.327216 | 0.974266 | 1 ETF1       | K03265 |
| ENSG00000170917 | 0.038801  | 2.492601 | 0.974404 | 1 NUDT6      | -      |
| ENSG00000167380 | -0.029996 | 3.539249 | 0.974544 | 1 ZNF226     | K09228 |
| ENSG00000147416 | 0.026438  | 5.147845 | 0.974559 | 1 ATP6V1B2   | K02147 |
| ENSG00000135334 | -0.023262 | 5.147931 | 0.974559 | 1 AKIRIN2    | -      |

|                 |           |          |          |              |        |
|-----------------|-----------|----------|----------|--------------|--------|
| ENSG00000111647 | -0.031499 | 4.138644 | 0.974584 | 1 UHRF1BP1L  | -      |
| ENSG00000160201 | -0.021715 | 7.290216 | 0.974588 | 1 U2AF1      | K12836 |
| ENSG00000130734 | -0.028578 | 4.558947 | 0.974602 | 1 ATG4D      | K08342 |
| ENSG00000181090 | -0.023153 | 5.896249 | 0.974669 | 1 EHMT1      | K11420 |
| ENSG00000135018 | 0.021316  | 7.781507 | 0.97467  | 1 UBQLN1     | K04523 |
| ENSG00000103174 | -0.02823  | 4.566367 | 0.974693 | 1 NAGPA      | K01125 |
| ENSG00000160447 | 0.022633  | 5.897057 | 0.974706 | 1 PKN3       | K06071 |
| ENSG00000163281 | -0.024257 | 4.571887 | 0.974784 | 1 GNPDA2     | K02564 |
| ENSG00000138757 | -0.021519 | 7.212518 | 0.974888 | 1 G3BP2      | -      |
| ENSG00000075415 | 0.020664  | 9.643682 | 0.974959 | 1 SLC25A3    | K15102 |
| ENSG00000115073 | 0.024158  | 4.905975 | 0.974973 | 1 ACTR1B     | K16575 |
| ENSG00000110057 | 0.02214   | 5.396138 | 0.974985 | 1 UNC93B1    | -      |
| ENSG00000182022 | 0.023902  | 3.571937 | 0.975085 | 1 CHST15     | K08106 |
| ENSG00000171311 | -0.023586 | 5.402394 | 0.975086 | 1 EXOSC1     | K07573 |
| ENSG00000134452 | 0.021897  | 6.372426 | 0.975118 | 1 FBXO18     | K10300 |
| ENSG00000253368 | -0.05414  | 2.541743 | 0.975128 | 1 TRNP1      | -      |
| ENSG00000081019 | 0.024215  | 4.591765 | 0.97514  | 1 RSBN1      | -      |
| ENSG00000131143 | -0.020736 | 8.230525 | 0.975253 | 1 COX4I1     | K02263 |
| ENSG00000096654 | -0.027873 | 3.583785 | 0.97526  | 1 ZNF184     | K09228 |
| ENSG00000167394 | 0.024212  | 4.179855 | 0.975297 | 1 ZNF668     | -      |
| ENSG00000167526 | -0.020262 | 10.59691 | 0.97537  | 1 RPL13      | K02873 |
| ENSG00000182117 | -0.021426 | 6.809597 | 0.975374 | 1 NOP10      | K11130 |
| ENSG00000099800 | -0.021537 | 6.562924 | 0.975525 | 1 TIMM13     | K17781 |
| ENSG00000148331 | 0.024509  | 4.940665 | 0.975529 | 1 ASB6       | K10328 |
| ENSG00000176454 | -0.021666 | 6.210582 | 0.975545 | 1 LPCAT4     | K13512 |
| ENSG00000165138 | 0.02321   | 5.949101 | 0.975582 | 1 ANKS6      | -      |
| ENSG00000144677 | 0.022242  | 5.213156 | 0.975671 | 1 CTDSPL     | K15731 |
| ENSG00000105429 | 0.024622  | 4.952045 | 0.975732 | 1 MEGF8      | -      |
| ENSG00000121903 | 0.038805  | 2.583197 | 0.975812 | 1 ZSCAN20    | K09230 |
| ENSG00000149257 | -0.019983 | 9.157273 | 0.975899 | 1 SERPINH1   | K09501 |
| ENSG00000094916 | 0.020323  | 7.528288 | 0.976013 | 1 CBX5       | K11587 |
| ENSG00000130749 | 0.024787  | 4.648824 | 0.976068 | 1 ZC3H4      | -      |
| ENSG00000123562 | -0.019816 | 9.213165 | 0.976092 | 1 MORF4L2    | K11342 |
| ENSG00000170653 | 0.024898  | 4.980109 | 0.976191 | 1 ATF7       | K09045 |
| ENSG00000127774 | 0.021376  | 4.657556 | 0.97623  | 1 EMC6       | -      |
| ENSG00000162885 | -0.031045 | 4.246534 | 0.9764   | 1 B3GALNT2   | K09654 |
| ENSG00000203644 | -0.048509 | 2.629236 | 0.97646  | 1 AC083799.1 | -      |
| ENSG00000065911 | -0.019532 | 8.457808 | 0.976638 | 1 MTHFD2     | K13403 |
| ENSG00000145868 | -0.022619 | 5.273414 | 0.976639 | 1 FBXO38     | K10313 |
| ENSG00000114978 | -0.02002  | 7.220192 | 0.976705 | 1 MOB1A      | K06685 |
| ENSG00000008128 | -0.032864 | 2.649857 | 0.976771 | 1 CDK11A     | K08818 |
| ENSG00000172345 | -0.032864 | 2.649857 | 0.976771 | 1 STARD5     | K10373 |
| ENSG00000122390 | 0.024477  | 2.64805  | 0.976771 | 1 NAA60      | -      |
| ENSG00000213145 | 0.024477  | 2.64805  | 0.976771 | 1 CRIP1      | -      |
| ENSG00000116514 | 0.025188  | 4.690185 | 0.976778 | 1 RNF19B     | K11973 |
| ENSG00000158480 | -0.023393 | 3.682655 | 0.976883 | 1 SPATA2     | K17595 |
| ENSG00000111371 | 0.019152  | 8.999219 | 0.976911 | 1 SLC38A1    | K14990 |
| ENSG00000130741 | -0.018983 | 9.580846 | 0.977044 | 1 EIF2S3     | K03242 |
| ENSG00000158163 | 0.038809  | 2.668441 | 0.977074 | 1 DZIP1L     | K16470 |
| ENSG00000167578 | 0.038809  | 2.668441 | 0.977074 | 1 RAB4B      | K07880 |
| ENSG00000116096 | 0.022533  | 5.888198 | 0.977087 | 1 SPR        | K00072 |
| ENSG00000167393 | -0.023663 | 5.301485 | 0.977094 | 1 PPP2R3B    | K11583 |
| ENSG00000065361 | -0.029491 | 3.699719 | 0.977183 | 1 ERBB3      | K05084 |
| ENSG00000145860 | -0.020092 | 6.619772 | 0.97721  | 1 RNF145     | -      |
| ENSG00000115649 | -0.024046 | 4.298658 | 0.977214 | 1 CNPPD1     | -      |
| ENSG00000168066 | 0.019613  | 6.774538 | 0.977444 | 1 SF1        | K13095 |
| ENSG00000136861 | -0.020103 | 6.40837  | 0.977471 | 1 CDK5RAP2   | K16542 |
| ENSG00000204084 | -0.023272 | 4.316369 | 0.977505 | 1 INPP5B     | K01099 |

|                 |           |          |          |                |        |
|-----------------|-----------|----------|----------|----------------|--------|
| ENSG00000230409 | -0.019252 | 5.552897 | 0.977536 | 1 TCEA1P2      | K03145 |
| ENSG00000126067 | 0.019084  | 7.435048 | 0.977578 | 1 PSMB2        | K02734 |
| ENSG00000177732 | -0.020933 | 5.55756  | 0.977617 | 1 SOX12        | K09268 |
| ENSG00000247572 | -0.030121 | 2.704624 | 0.977656 | 1 CKMT2-AS1    | -      |
| ENSG00000185513 | 0.025027  | 2.702945 | 0.977656 | 1 L3MBTL1      | -      |
| ENSG00000141428 | 0.021268  | 4.329175 | 0.977694 | 1 C18orf21     | -      |
| ENSG00000043143 | 0.021556  | 5.929802 | 0.97773  | 1 JADE2        | K11347 |
| ENSG00000229944 | 0.025724  | 4.335673 | 0.977788 | 1 AC004797.1   | K03259 |
| ENSG00000104738 | 0.018522  | 8.534777 | 0.977793 | 1 MCM4         | K02212 |
| ENSG00000070018 | -0.019357 | 5.765322 | 0.977821 | 1 LRP6         | K03068 |
| ENSG00000123485 | 0.020235  | 5.939123 | 0.977885 | 1 HJURP        | -      |
| ENSG00000011114 | -0.026995 | 3.752698 | 0.977899 | 1 BTBD7        | K10479 |
| ENSG00000253716 | 0.025678  | 3.751973 | 0.977899 | 1 RP13-582O9.5 | -      |
| ENSG00000243701 | 0.038812  | 2.722596 | 0.977937 | 1 LINC00883    | -      |
| ENSG00000158856 | 0.026029  | 3.790513 | 0.978571 | 1 DMTN         | -      |
| ENSG00000129195 | 0.022188  | 5.400298 | 0.978622 | 1 FAM64A       | -      |
| ENSG00000157617 | 0.021379  | 5.140412 | 0.978669 | 1 C2CD2        | -      |
| ENSG00000145982 | -0.021034 | 5.14173  | 0.978721 | 1 FARS2        | K01889 |
| ENSG00000184900 | 0.018448  | 6.911994 | 0.978735 | 1 SUMO3        | K12160 |
| ENSG00000101966 | -0.020525 | 4.818695 | 0.978739 | 1 XIAP         | K04725 |
| ENSG00000178028 | 0.021253  | 5.642558 | 0.978882 | 1 DMAP1        | K11324 |
| ENSG00000103549 | 0.020412  | 5.837705 | 0.978916 | 1 RNF40        | K10696 |
| ENSG00000125652 | -0.022837 | 5.157791 | 0.978925 | 1 ALKBH7       | K10769 |
| ENSG00000217930 | -0.023047 | 4.832622 | 0.97893  | 1 PAM16        | K17805 |
| ENSG00000197006 | 0.019241  | 6.163128 | 0.978938 | 1 METTL9       | -      |
| ENSG00000148339 | -0.027457 | 4.414252 | 0.978939 | 1 SLC25A25     | K14684 |
| ENSG00000148343 | 0.022279  | 4.41391  | 0.978939 | 1 FAM73B       | -      |
| ENSG00000155827 | -0.020894 | 5.843006 | 0.978979 | 1 RNF20        | K10696 |
| ENSG00000171408 | 0.038815  | 2.800198 | 0.978991 | 1 PDE7B        | K18436 |
| ENSG00000102871 | -0.023575 | 3.828693 | 0.97908  | 1 TRADD        | K03171 |
| ENSG00000138867 | 0.019373  | 6.172888 | 0.979088 | 1 GUCD1        | -      |
| ENSG00000138814 | -0.022153 | 5.657377 | 0.979097 | 1 PPP3CA       | K04348 |
| ENSG00000188938 | -0.019816 | 5.171236 | 0.979124 | 1 FAM120AOS    | -      |
| ENSG00000103145 | -0.020301 | 5.659983 | 0.979132 | 1 HCFC1R1      | -      |
| ENSG00000008018 | -0.017586 | 8.112233 | 0.979141 | 1 PSMB1        | K02732 |
| ENSG00000077549 | 0.01783   | 6.968418 | 0.979439 | 1 CAPZB        | K10365 |
| ENSG00000099260 | 0.020794  | 4.871941 | 0.979482 | 1 PALMD        | K16519 |
| ENSG00000168028 | 0.016896  | 10.16209 | 0.979499 | 1 RPSA         | K02998 |
| ENSG00000142632 | -0.021241 | 4.875076 | 0.979542 | 1 ARHGEF19     | -      |
| ENSG00000088876 | -0.027382 | 3.880276 | 0.9798   | 1 ZNF343       | K09228 |
| ENSG00000198712 | -0.016519 | 13.01993 | 0.979848 | 1 MT-CO2       | K02261 |
| ENSG00000122741 | 0.018322  | 5.905124 | 0.979879 | 1 DCAF10       | K11802 |
| ENSG00000117616 | -0.020016 | 5.224988 | 0.979887 | 1 C1orf63      | K09654 |
| ENSG00000165895 | 0.020936  | 3.891554 | 0.979915 | 1 ARHGAP42     | -      |
| ENSG00000112576 | 0.018074  | 6.079986 | 0.979928 | 1 CCND3        | K10152 |
| ENSG00000030066 | -0.016999 | 7.946316 | 0.979932 | 1 NUP160       | K14303 |
| ENSG00000143793 | -0.022123 | 5.230841 | 0.979978 | 1 C1orf35      | -      |
| ENSG00000141582 | -0.017858 | 6.538142 | 0.980026 | 1 CBX4         | K11452 |
| ENSG00000105176 | -0.017356 | 6.98325  | 0.980151 | 1 URI1         | K17560 |
| ENSG00000137563 | 0.017241  | 6.928646 | 0.980189 | 1 GGH          | K01307 |
| ENSG00000065357 | -0.025763 | 3.915557 | 0.980252 | 1 DGKA         | K00901 |
| ENSG00000103037 | -0.021905 | 4.929335 | 0.980286 | 1 SETD6        | K05302 |
| ENSG00000113240 | 0.027172  | 3.923627 | 0.980363 | 1 CLK4         | K08823 |
| ENSG00000171530 | 0.016742  | 7.511782 | 0.980383 | 1 TBCA         | K17292 |
| ENSG00000177576 | 0.026863  | 2.903768 | 0.980395 | 1 C18orf32     | -      |
| ENSG00000162591 | 0.018729  | 4.937823 | 0.980395 | 1 MEGF6        | -      |
| ENSG00000180901 | 0.018729  | 4.937823 | 0.980395 | 1 KCTD2        | K02138 |
| ENSG00000160408 | 0.019602  | 4.519051 | 0.980421 | 1 ST6GALNAC6   | K03376 |

|                 |           |          |          |                 |        |
|-----------------|-----------|----------|----------|-----------------|--------|
| ENSG00000152700 | -0.020172 | 5.530302 | 0.980442 | 1 SAR1B         | K07953 |
| ENSG00000100099 | 0.021656  | 4.942101 | 0.98045  | 1 HPS4          | -      |
| ENSG00000139644 | 0.016086  | 9.910783 | 0.980513 | 1 TMBIM6        | -      |
| ENSG00000158717 | 0.018888  | 4.949225 | 0.980558 | 1 RNF166        | K17044 |
| ENSG00000184432 | -0.016263 | 8.659123 | 0.98056  | 1 COPB2         | K17302 |
| ENSG00000262001 | -0.024727 | 3.938608 | 0.980579 | 1 DLGAP1-AS2    | -      |
| ENSG00000171824 | -0.017584 | 6.366473 | 0.980589 | 1 EXOSC10       | K12591 |
| ENSG00000169131 | 0.03882   | 2.920926 | 0.980611 | 1 ZNF354A       | K09228 |
| ENSG00000146457 | -0.017312 | 6.575868 | 0.980642 | 1 WTAP          | -      |
| ENSG00000111707 | -0.019403 | 5.549156 | 0.980692 | 1 SUDS3         | K19201 |
| ENSG00000196935 | -0.021872 | 4.540183 | 0.980707 | 1 SRGAP1        | K07526 |
| ENSG00000167930 | -0.017171 | 6.14146  | 0.980757 | 1 ITFG3         | K17258 |
| ENSG00000109332 | -0.016315 | 7.917407 | 0.980779 | 1 UBE2D3        | K06689 |
| ENSG00000071564 | -0.016549 | 7.350328 | 0.980831 | 1 TCF3          | K09063 |
| ENSG00000019995 | 0.016551  | 5.786175 | 0.980879 | 1 ZRANB1        | K11862 |
| ENSG00000183309 | 0.0165    | 5.299222 | 0.98089  | 1 ZNF623        | K09228 |
| ENSG00000235954 | -0.023724 | 3.961296 | 0.980895 | 1 TTC28-AS1     | -      |
| ENSG00000128891 | 0.027248  | 2.949893 | 0.981029 | 1 C15orf57      | -      |
| ENSG00000107771 | -0.016974 | 4.568154 | 0.981053 | 1 CCSER2        | K12022 |
| ENSG00000177508 | 0.019575  | 4.999448 | 0.981231 | 1 IRX3          | -      |
| ENSG00000171135 | 0.017211  | 6.191006 | 0.981411 | 1 JAGN1         | K05168 |
| ENSG00000230897 | 0.016018  | 6.191603 | 0.981411 | 1 RPS18P12      | K02964 |
| ENSG00000133794 | 0.019865  | 5.021221 | 0.981477 | 1 ARNTL         | K02296 |
| ENSG00000008838 | 0.017319  | 6.198192 | 0.981497 | 1 MED24         | K15167 |
| ENSG00000099622 | 0.016002  | 6.030517 | 0.981539 | 1 CIRBP         | K13195 |
| ENSG00000100154 | 0.020762  | 4.608061 | 0.981581 | 1 TTC28         | -      |
| ENSG00000158691 | 0.022433  | 4.016037 | 0.981594 | 1 ZSCAN12       | K09230 |
| ENSG00000184588 | 0.022433  | 4.016037 | 0.981594 | 1 PDE4B         | K13293 |
| ENSG00000105662 | 0.027609  | 2.99459  | 0.981624 | 1 CRTC1         | K15309 |
| ENSG00000261061 | 0.027609  | 2.99459  | 0.981624 | 1 RP11-303E16.2 | -      |
| ENSG00000157350 | -0.018835 | 4.613654 | 0.981645 | 1 ST3GAL2       | K03368 |
| ENSG00000014164 | -0.016866 | 5.360309 | 0.981685 | 1 ZC3H3         | -      |
| ENSG00000138663 | 0.016537  | 6.298554 | 0.981721 | 1 COPS4         | K12178 |
| ENSG00000127603 | 0.015788  | 7.13712  | 0.98179  | 1 MACF1         | -      |
| ENSG00000121864 | 0.017675  | 5.860527 | 0.981836 | 1 ZNF639        | K12581 |
| ENSG00000175061 | 0.015059  | 9.031318 | 0.981898 | 1 FAM211A-AS1   | -      |
| ENSG00000007541 | -0.017159 | 6.234669 | 0.98196  | 1 PIGQ          | K03860 |
| ENSG00000166887 | -0.019015 | 5.648664 | 0.981976 | 1 VPS39         | K09228 |
| ENSG00000196510 | -0.015929 | 6.81001  | 0.982058 | 1 ANAPC7        | K03354 |
| ENSG00000085999 | 0.016177  | 5.655664 | 0.982067 | 1 RAD54L        | K10875 |
| ENSG00000163655 | -0.015263 | 7.86721  | 0.982086 | 1 GMPS          | K01951 |
| ENSG00000138375 | 0.017882  | 5.070352 | 0.982089 | 1 SMARCAL1      | K02159 |
| ENSG00000108389 | 0.018033  | 5.080757 | 0.982225 | 1 MTMR4         | K18082 |
| ENSG00000198001 | -0.024307 | 4.072345 | 0.982243 | 1 IRAK4         | K04733 |
| ENSG00000140006 | 0.023033  | 4.069255 | 0.982243 | 1 WDR89         | K00757 |
| ENSG00000124571 | 0.015589  | 6.822588 | 0.982292 | 1 XPO5          | K14289 |
| ENSG00000125651 | 0.015954  | 6.398638 | 0.982302 | 1 GTF2F1        | K03138 |
| ENSG00000131115 | 0.028111  | 3.059144 | 0.98236  | 1 ZNF227        | K09228 |
| ENSG00000133026 | 0.028111  | 3.059144 | 0.98236  | 1 MYH10         | K10352 |
| ENSG00000168904 | 0.028111  | 3.059144 | 0.98236  | 1 LRRC28        | -      |
| ENSG00000185761 | -0.020436 | 5.095021 | 0.982402 | 1 ADAMTSL5      | K15686 |
| ENSG00000096080 | 0.014966  | 5.687501 | 0.982454 | 1 MRPS18A       | K02963 |
| ENSG00000135766 | -0.015874 | 6.464084 | 0.982531 | 1 EGLN1         | K09592 |
| ENSG00000254166 | 0.038825  | 3.07459  | 0.982535 | 1 CASC19        | -      |
| ENSG00000110011 | -0.035631 | 3.071142 | 0.982535 | 1 DNAJC4        | K09524 |
| ENSG00000101132 | -0.01634  | 5.919631 | 0.982556 | 1 PFDN4         | K09550 |
| ENSG00000138802 | 0.016564  | 5.440245 | 0.982658 | 1 SEC24B        | K14007 |
| ENSG00000174197 | -0.017313 | 5.931892 | 0.982702 | 1 MGA           | -      |

|                 |           |          |          |                 |        |
|-----------------|-----------|----------|----------|-----------------|--------|
| ENSG00000115268 | 0.014178  | 10.00887 | 0.982831 | 1 RPS15         | K02958 |
| ENSG00000139725 | -0.018099 | 4.718976 | 0.982893 | 1 RHOF          | K07872 |
| ENSG00000130589 | 0.018781  | 4.720475 | 0.982948 | 1 HELZ2         | -      |
| ENSG00000124209 | 0.016934  | 5.464287 | 0.98296  | 1 RAB22A        | K07891 |
| ENSG00000110047 | 0.015733  | 5.73439  | 0.983018 | 1 EHD1          | K12483 |
| ENSG00000138639 | 0.02857   | 3.120933 | 0.98304  | 1 ARHGAP24      | -      |
| ENSG00000051523 | 0.01439   | 7.86455  | 0.98307  | 1 CYBA          | K08009 |
| ENSG00000128789 | -0.015448 | 5.740114 | 0.983072 | 1 PSMG2         | K11876 |
| ENSG00000120868 | -0.021236 | 4.143518 | 0.983095 | 1 APAF1         | K02084 |
| ENSG00000164011 | 0.023908  | 4.150522 | 0.983176 | 1 ZNF691        | -      |
| ENSG00000112759 | -0.015159 | 6.584126 | 0.983248 | 1 SLC29A1       | K15014 |
| ENSG00000220205 | -0.025685 | 4.155913 | 0.983256 | 1 VAMP2         | K13504 |
| ENSG00000130489 | -0.015016 | 5.168792 | 0.983279 | 1 SCO2          | K07152 |
| ENSG00000140497 | -0.015867 | 5.492814 | 0.983283 | 1 SCAMP2        | -      |
| ENSG00000108829 | 0.014032  | 8.464723 | 0.983289 | 1 LRRC59        | -      |
| ENSG00000183864 | 0.016631  | 5.983463 | 0.983311 | 1 TOB2          | K14443 |
| ENSG00000147324 | 0.019325  | 4.759858 | 0.983377 | 1 MFHAS1        | -      |
| ENSG00000135241 | 0.019413  | 4.766318 | 0.983481 | 1 PNPLA8        | K16815 |
| ENSG00000154114 | 0.028855  | 3.160704 | 0.983517 | 1 TBCEL         | K18273 |
| ENSG00000141404 | -0.019223 | 4.772908 | 0.983532 | 1 GNAL          | K04633 |
| ENSG00000105298 | 0.017173  | 5.191723 | 0.983552 | 1 CACTIN        | K17985 |
| ENSG00000257267 | -0.019612 | 4.182667 | 0.983568 | 1 ZNF271        | K09230 |
| ENSG00000135414 | -0.015812 | 4.777699 | 0.983583 | 1 GDF11         | K05497 |
| ENSG00000163975 | 0.015847  | 5.519831 | 0.983595 | 1 MFI2          | K06569 |
| ENSG00000131148 | 0.015908  | 5.523649 | 0.983625 | 1 EMC8          | -      |
| ENSG00000182670 | 0.014169  | 7.222114 | 0.983699 | 1 TTC3          | K15712 |
| ENSG00000154640 | -0.015573 | 6.214737 | 0.983733 | 1 BTG3          | K14443 |
| ENSG00000147548 | -0.016387 | 6.027765 | 0.983815 | 1 WHSC1L1       | K11425 |
| ENSG00000156603 | -0.020783 | 4.812467 | 0.983981 | 1 MED19         | K15137 |
| ENSG00000167985 | -0.017459 | 4.817129 | 0.98403  | 1 SDHAF2        | K18168 |
| ENSG00000075420 | -0.014278 | 6.747314 | 0.984132 | 1 FNDC3B        | -      |
| ENSG00000124614 | -0.013445 | 8.222073 | 0.984144 | 1 RPS10         | K02947 |
| ENSG00000153989 | -0.014062 | 6.93999  | 0.984198 | 1 NUS1          | K19177 |
| ENSG00000178234 | -0.016618 | 5.251703 | 0.984215 | 1 GALNT11       | K00710 |
| ENSG00000107625 | -0.014763 | 5.843015 | 0.984233 | 1 DDX50         | K13183 |
| ENSG00000109572 | 0.017264  | 4.837085 | 0.984267 | 1 CLCN3         | K05012 |
| ENSG00000006194 | -0.016149 | 5.846828 | 0.98428  | 1 ZNF263        | K09229 |
| ENSG00000158122 | 0.015632  | 4.250757 | 0.9843   | 1 AAED1         | -      |
| ENSG00000105397 | -0.015769 | 6.078615 | 0.984368 | 1 TYK2          | K11219 |
| ENSG00000068654 | 0.014571  | 5.855987 | 0.984373 | 1 POLR1A        | K02999 |
| ENSG00000073712 | -0.013786 | 7.059874 | 0.984426 | 1 FERMT2        | K17083 |
| ENSG00000244038 | -0.014107 | 6.636639 | 0.984463 | 1 DDOST         | K12670 |
| ENSG00000204673 | -0.014314 | 6.396985 | 0.984517 | 1 AKT1S1        | K16184 |
| ENSG00000120158 | -0.01557  | 4.866062 | 0.984543 | 1 RCL1          | K11222 |
| ENSG00000163781 | -0.013966 | 6.687731 | 0.984577 | 1 TOPBP1        | K10728 |
| ENSG00000000419 | 0.013913  | 6.516378 | 0.984641 | 1 DPM1          | K00721 |
| ENSG00000184677 | 0.025227  | 4.282578 | 0.984643 | 1 ZBTB40        | K10512 |
| ENSG00000215717 | 0.013494  | 5.88076  | 0.984646 | 1 TMEM167B      | -      |
| ENSG00000168005 | -0.015117 | 4.878041 | 0.984678 | 1 C11orf84      | -      |
| ENSG00000206418 | 0.016548  | 5.885224 | 0.98469  | 1 RAB12         | K07907 |
| ENSG00000221869 | -0.013925 | 6.592789 | 0.984737 | 1 CEBPD         | K10050 |
| ENSG00000113161 | 0.013867  | 6.457209 | 0.984766 | 1 HMGCR         | K00021 |
| ENSG00000198556 | 0.020472  | 3.278551 | 0.984798 | 1 ZNF789        | K11447 |
| ENSG00000262580 | 0.020472  | 3.278551 | 0.984798 | 1 RP11-334C17.5 | -      |
| ENSG00000109171 | 0.016774  | 5.316934 | 0.984892 | 1 SLAIN2        | K16580 |
| ENSG00000137713 | -0.013339 | 5.659988 | 0.985094 | 1 PPP2R1B       | K03456 |
| ENSG00000132716 | -0.01466  | 5.671218 | 0.985219 | 1 DCAF8         | K11804 |
| ENSG00000256663 | 0.021374  | 4.337876 | 0.985222 | 1 RP11-424C20.2 | K10638 |



|                 |           |          |          |                 |        |
|-----------------|-----------|----------|----------|-----------------|--------|
| ENSG00000061987 | 0.014738  | 5.673819 | 0.985243 | 1 MON2          | -      |
| ENSG00000093183 | 0.015784  | 4.933532 | 0.985275 | 1 SEC22C        | K08520 |
| ENSG00000100280 | 0.012964  | 6.970847 | 0.985355 | 1 AP1B1         | K12392 |
| ENSG00000147316 | -0.02106  | 4.368234 | 0.985526 | 1 MCPH1         | K19403 |
| ENSG00000159884 | 0.021363  | 3.349093 | 0.985547 | 1 CCDC107       | -      |
| ENSG00000105443 | 0.016325  | 4.967571 | 0.985596 | 1 CYTH2         | K18441 |
| ENSG00000186575 | -0.014938 | 5.709433 | 0.985605 | 1 NF2           | K16684 |
| ENSG00000197969 | -0.012237 | 5.992392 | 0.985781 | 1 VPS13A        | K19525 |
| ENSG00000165097 | 0.016181  | 5.415795 | 0.98589  | 1 KDM1B         | K19413 |
| ENSG00000166337 | -0.013194 | 6.004053 | 0.985895 | 1 TAF10         | K03134 |
| ENSG00000188215 | 0.021977  | 3.399827 | 0.986006 | 1 DCUN1D3       | K17823 |
| ENSG00000152443 | 0.03048   | 3.412083 | 0.986117 | 1 ZNF776        | K09228 |
| ENSG00000076321 | 0.022172  | 3.416349 | 0.986117 | 1 KLHL20        | K10457 |
| ENSG00000168214 | 0.014649  | 5.767776 | 0.98617  | 1 RBPJ          | K06053 |
| ENSG00000112118 | 0.01166   | 8.389801 | 0.986203 | 1 MCM3          | K02541 |
| ENSG00000176155 | 0.014689  | 5.449308 | 0.986221 | 1 CCDC57        | -      |
| ENSG00000183648 | -0.014761 | 5.038755 | 0.98627  | 1 NDUFB1        | K03957 |
| ENSG00000160087 | 0.013335  | 5.784581 | 0.98632  | 1 UBE2J2        | K04554 |
| ENSG00000088325 | -0.011502 | 8.422886 | 0.98644  | 1 TPX2          | K16812 |
| ENSG00000104824 | 0.011748  | 7.47599  | 0.986487 | 1 HNRNPL        | K13159 |
| ENSG00000099203 | -0.020334 | 4.484452 | 0.986625 | 1 TMED1         | -      |
| ENSG00000152133 | -0.016463 | 4.482467 | 0.986625 | 1 GPATCH11      | K12581 |
| ENSG00000198924 | -0.016162 | 4.490291 | 0.986675 | 1 DCLRE1A       | -      |
| ENSG00000071189 | -0.015767 | 5.082124 | 0.986685 | 1 SNX13         | K17925 |
| ENSG00000163257 | 0.015451  | 5.082058 | 0.986685 | 1 DCAF16        | K02927 |
| ENSG00000147799 | 0.015406  | 4.49788  | 0.986725 | 1 ARHGAP39      | -      |
| ENSG00000077380 | -0.012473 | 6.097958 | 0.986777 | 1 DYNC1I2       | K10415 |
| ENSG00000197857 | 0.023084  | 3.496238 | 0.986843 | 1 ZNF44         | K09228 |
| ENSG00000143179 | -0.011635 | 7.289704 | 0.986859 | 1 UCK2          | K00876 |
| ENSG00000100299 | -0.01461  | 5.112861 | 0.98698  | 1 ARSA          | K01134 |
| ENSG00000177971 | 0.012124  | 6.360169 | 0.987    | 1 IMP3          | K12756 |
| ENSG00000270170 | -0.01175  | 5.1217   | 0.987044 | 1 NCBP2-AS2     | -      |
| ENSG00000136888 | 0.011274  | 7.424581 | 0.987094 | 1 ATP6V1G1      | K02152 |
| ENSG00000169635 | 0.023422  | 3.526996 | 0.987131 | 1 HIC2          | -      |
| ENSG00000180902 | 0.023422  | 3.526996 | 0.987131 | 1 D2HGDH        | -      |
| ENSG00000079999 | -0.013538 | 5.876246 | 0.987158 | 1 KEAP1         | K10456 |
| ENSG00000138399 | -0.017852 | 4.545803 | 0.987161 | 1 FASTKD1       | -      |
| ENSG00000108788 | 0.013598  | 5.886702 | 0.987251 | 1 MLX           | K09113 |
| ENSG00000166965 | -0.011544 | 5.890365 | 0.987288 | 1 RCCD1         | -      |
| ENSG00000130560 | 0.011723  | 6.501925 | 0.987319 | 1 UBAC1         | K12174 |
| ENSG00000120725 | -0.011068 | 6.173421 | 0.987452 | 1 SIL1          | K14001 |
| ENSG00000170385 | 0.010898  | 7.405045 | 0.987564 | 1 SLC30A1       | K14688 |
| ENSG00000103342 | -0.010423 | 8.780303 | 0.98765  | 1 GSPT1         | K03267 |
| ENSG00000107404 | -0.011312 | 6.807681 | 0.987674 | 1 DVL1          | K02353 |
| ENSG00000182149 | -0.011298 | 6.76235  | 0.987738 | 1 IST1          | K19476 |
| ENSG00000100075 | 0.024205  | 3.601139 | 0.987757 | 1 SLC25A1       | K15100 |
| ENSG00000142208 | 0.011515  | 6.327773 | 0.98778  | 1 AKT1          | K04456 |
| ENSG00000254087 | 0.01214   | 5.96602  | 0.987932 | 1 LYN           | K05854 |
| ENSG00000186635 | 0.011348  | 6.31901  | 0.987994 | 1 ARAP1         | K18439 |
| ENSG00000177738 | -0.025876 | 3.626989 | 0.988008 | 1 CTD-2201E18.3 | -      |
| ENSG00000141101 | 0.011442  | 6.002733 | 0.988238 | 1 NOB1          | K11883 |
| ENSG00000182541 | 0.017796  | 3.661403 | 0.988248 | 1 LIMK2         | K05744 |
| ENSG00000164244 | -0.010923 | 6.701712 | 0.98826  | 1 PRRC1         | K12581 |
| ENSG00000111231 | 0.011584  | 5.689199 | 0.988322 | 1 GPN3          | K06883 |
| ENSG0000016864  | -0.012802 | 6.014945 | 0.988331 | 1 GLT8D1        | -      |
| ENSG00000160710 | 0.009824  | 8.253441 | 0.988485 | 1 ADAR          | K12968 |
| ENSG00000172819 | -0.010848 | 6.57635  | 0.988497 | 1 RARG          | K08529 |
| ENSG00000115596 | -0.011399 | 5.714456 | 0.988512 | 1 WNT6          | K00445 |

|                 |           |          |          |                  |        |
|-----------------|-----------|----------|----------|------------------|--------|
| ENSG00000126215 | -0.015061 | 4.710612 | 0.988539 | 1 XRCC3          | K10880 |
| ENSG00000106803 | 0.010756  | 6.399142 | 0.988614 | 1 SEC61B         | K09481 |
| ENSG00000130052 | -0.015563 | 3.706253 | 0.988627 | 1 STARD8         | -      |
| ENSG00000156531 | -0.010845 | 6.46559  | 0.988638 | 1 PHF6           | -      |
| ENSG00000230453 | 0.018586  | 3.715812 | 0.9887   | 1 ANKRD18B       | K17299 |
| ENSG00000171970 | -0.021652 | 3.723042 | 0.988772 | 1 ZNF57          | K09228 |
| ENSG00000198858 | 0.011141  | 5.75321  | 0.988822 | 1 R3HDM4         | -      |
| ENSG00000187522 | 0.011588  | 6.08062  | 0.988848 | 1 HSPA14         | -      |
| ENSG00000177303 | 0.009392  | 4.751783 | 0.988865 | 1 CASKIN2        | -      |
| ENSG00000130584 | -0.020006 | 3.76233  | 0.989051 | 1 ZBTB46         | K10517 |
| ENSG00000183723 | 0.011308  | 5.376218 | 0.989123 | 1 CMTM4          | -      |
| ENSG00000168397 | 0.010427  | 5.798829 | 0.989165 | 1 ATG4B          | K08342 |
| ENSG00000173611 | 0.019493  | 3.781061 | 0.989186 | 1 SCAI           | -      |
| ENSG00000198722 | 0.016792  | 4.806066 | 0.989272 | 1 UNC13B         | K15293 |
| ENSG00000166037 | 0.009602  | 7.170052 | 0.989295 | 1 CEP57          | K16762 |
| ENSG00000106299 | -0.010538 | 6.153231 | 0.989399 | 1 WASL           | K05747 |
| ENSG00000078747 | 0.011765  | 6.156977 | 0.989424 | 1 ITCH           | K05632 |
| ENSG00000006125 | -0.010206 | 6.455134 | 0.989429 | 1 AP2B1          | K11825 |
| ENSG00000103966 | -0.012472 | 5.421956 | 0.98947  | 1 EHD4           | K12477 |
| ENSG00000123933 | -0.012472 | 5.421956 | 0.98947  | 1 MXD4           | K09114 |
| ENSG00000131871 | -0.0109   | 6.178274 | 0.989574 | 1 VIMP           | K14025 |
| ENSG00000179152 | -0.013739 | 5.443279 | 0.989615 | 1 TCAIM          | -      |
| ENSG00000106344 | -0.011009 | 5.862748 | 0.989628 | 1 RBM28          | K14573 |
| ENSG00000163013 | 0.010856  | 5.459312 | 0.989736 | 1 FBXO41         | -      |
| ENSG00000154237 | 0.020634  | 3.867721 | 0.989811 | 1 LRRK1          | K08843 |
| ENSG00000110700 | -0.008657 | 8.492012 | 0.989888 | 1 RPS13          | K02953 |
| ENSG00000204253 | 0.008872  | 3.885779 | 0.989928 | 1 HNRNPCP2       | K12884 |
| ENSG00000154380 | -0.008926 | 7.631941 | 0.989934 | 1 ENAH           | K05746 |
| ENSG00000100410 | 0.009725  | 6.292952 | 0.989999 | 1 PHF5A          | K12834 |
| ENSG00000178464 | -0.009749 | 6.377615 | 0.990087 | 1 CTD-2192J16.15 | K02866 |
| ENSG00000172888 | -0.014229 | 3.909596 | 0.990098 | 1 ZNF621         | K09228 |
| ENSG00000167136 | -0.013799 | 3.921217 | 0.990153 | 1 ENDOG          | K01173 |
| ENSG00000054148 | 0.010211  | 6.260713 | 0.990157 | 1 PHPT1          | K01112 |
| ENSG00000169813 | -0.008378 | 8.694001 | 0.990168 | 1 HNRNPF         | K12898 |
| ENSG00000168303 | -0.01115  | 5.943351 | 0.990191 | 1 MPLKIP         | K17985 |
| ENSG00000196981 | 0.021371  | 3.926583 | 0.990208 | 1 WDR5B          | K14963 |
| ENSG00000154124 | 0.009327  | 6.479483 | 0.990255 | 1 FAM105B        | K18343 |
| ENSG00000075856 | 0.009404  | 6.277204 | 0.990265 | 1 SART3          | -      |
| ENSG00000158793 | -0.012349 | 4.953568 | 0.990305 | 1 NIT1           | K05750 |
| ENSG00000119574 | 0.015778  | 3.940997 | 0.990316 | 1 ZBTB45         | K10516 |
| ENSG00000163155 | 0.010068  | 3.943916 | 0.990316 | 1 LYSMD1         | -      |
| ENSG00000185104 | 0.008913  | 6.909403 | 0.990335 | 1 FAF1           | -      |
| ENSG00000160957 | 0.008762  | 7.129278 | 0.990347 | 1 RECQL4         | K10730 |
| ENSG00000253797 | -0.011948 | 4.964845 | 0.990384 | 1 UTP14C         | K14567 |
| ENSG00000107186 | 0.013532  | 4.96898  | 0.99041  | 1 MPDZ           | K06095 |
| ENSG00000123364 | -0.014303 | 4.977434 | 0.990462 | 1 HOXC13         | K09298 |
| ENSG00000198746 | 0.016142  | 3.963659 | 0.990473 | 1 GPATCH3        | -      |
| ENSG00000134901 | -0.010973 | 4.992657 | 0.990564 | 1 KDELC1         | -      |
| ENSG00000116473 | -0.009306 | 6.421765 | 0.990566 | 1 RAP1A          | K04353 |
| ENSG00000101290 | 0.011283  | 4.998098 | 0.99059  | 1 CDS2           | K00981 |
| ENSG00000196428 | -0.010782 | 4.998156 | 0.99059  | 1 TSC22D2        | -      |
| ENSG00000109606 | -0.00832  | 7.676784 | 0.990646 | 1 DHX15          | K12820 |
| ENSG00000080839 | -0.02181  | 4.005632 | 0.990724 | 1 RBL1           | K04681 |
| ENSG00000106052 | -0.008133 | 7.721313 | 0.99085  | 1 TAX1BP1        | -      |
| ENSG00000063244 | 0.008209  | 7.375755 | 0.990857 | 1 U2AF2          | K12837 |
| ENSG00000123130 | 0.008685  | 6.628766 | 0.990875 | 1 ACOT9          | K17361 |
| ENSG00000137822 | 0.012493  | 5.06251  | 0.990998 | 1 TUBGCP4        | K16571 |
| ENSG00000087087 | -0.008533 | 6.844029 | 0.991017 | 1 SRRT           | -      |

|                 |           |          |          |                 |        |
|-----------------|-----------|----------|----------|-----------------|--------|
| ENSG00000144711 | -0.019575 | 4.059204 | 0.991053 | 1 IQSEC1        | K12495 |
| ENSG00000141219 | 0.012685  | 5.072971 | 0.991067 | 1 C17orf80      | -      |
| ENSG00000137812 | -0.009566 | 5.668638 | 0.991116 | 1 CASC5         | -      |
| ENSG00000033100 | 0.008724  | 6.351054 | 0.991114 | 1 CHPF2         | K03419 |
| ENSG00000253626 | -0.018312 | 4.090418 | 0.991232 | 1 EIF5AL1       | K03263 |
| ENSG00000181788 | 0.010033  | 5.696828 | 0.991277 | 1 SIAH2         | K08742 |
| ENSG00000108953 | 0.007234  | 9.482741 | 0.99137  | 1 YWHAE         | K06630 |
| ENSG00000182934 | 0.007845  | 7.144853 | 0.991452 | 1 SRPR          | K13431 |
| ENSG00000160360 | 0.008705  | 4.138264 | 0.991527 | 1 GPSM1         | K15839 |
| ENSG00000077463 | -0.012786 | 5.16268  | 0.991599 | 1 SIRT6         | K11416 |
| ENSG00000224870 | -0.015942 | 4.150894 | 0.991608 | 1 RP4-758J18.2  | -      |
| ENSG00000067369 | -0.008672 | 6.172211 | 0.991625 | 1 TP53BP1       | -      |
| ENSG00000051128 | -0.008366 | 6.450132 | 0.99167  | 1 HOMER3        | K15010 |
| ENSG00000105643 | 0.009625  | 5.176049 | 0.991679 | 1 ARRDC2        | -      |
| ENSG00000119638 | -0.008353 | 6.181909 | 0.991684 | 1 NEK9          | K08857 |
| ENSG00000071626 | -0.007381 | 7.878478 | 0.991686 | 1 DAZAP1        | K14411 |
| ENSG00000127463 | -0.008195 | 6.186734 | 0.991713 | 1 EMC1          | -      |
| ENSG00000164649 | -0.01192  | 5.186959 | 0.991737 | 1 CDCA7L        | K10408 |
| ENSG00000253570 | -0.01192  | 5.186959 | 0.991737 | 1 RNF5P1        | K10666 |
| ENSG00000164180 | -0.011083 | 5.210836 | 0.991871 | 1 TMEM161B      | -      |
| ENSG00000147789 | 0.010489  | 5.801977 | 0.991893 | 1 ZNF7          | K09228 |
| ENSG00000112851 | -0.007753 | 6.890976 | 0.99192  | 1 ERBB2IP       | K12796 |
| ENSG00000144455 | -0.013415 | 4.218389 | 0.991989 | 1 SUMF1         | K13444 |
| ENSG00000235174 | 0.00667   | 9.457258 | 0.992062 | 1 RPL39P3       | K02924 |
| ENSG00000105576 | 0.00794   | 6.314047 | 0.992139 | 1 TNPO2         | K18727 |
| ENSG00000133703 | -0.008074 | 6.330989 | 0.992187 | 1 KRAS          | K07827 |
| ENSG00000104447 | 0.01121   | 4.262267 | 0.992202 | 1 TRPS1         | -      |
| ENSG00000173660 | -0.006943 | 7.808411 | 0.992254 | 1 UQCRH         | K00416 |
| ENSG00000141736 | -0.007548 | 5.876255 | 0.992295 | 1 ERBB2         | K05083 |
| ENSG00000244313 | 0.007149  | 7.141437 | 0.992302 | 1 RP11-425L10.1 | K02947 |
| ENSG00000113742 | -0.015227 | 4.294124 | 0.992371 | 1 CPEB4         | K02602 |
| ENSG00000127184 | 0.006531  | 8.195206 | 0.99252  | 1 COX7C         | K02272 |
| ENSG00000149573 | 0.012394  | 4.324873 | 0.992533 | 1 MPZL2         | -      |
| ENSG00000074855 | 0.012555  | 4.333599 | 0.992595 | 1 ANO8          | K19502 |
| ENSG00000065268 | 0.008649  | 5.933373 | 0.992597 | 1 WDR18         | K14829 |
| ENSG00000169710 | -0.006186 | 9.433081 | 0.992683 | 1 FASN          | K00665 |
| ENSG00000113569 | -0.006509 | 7.809782 | 0.992783 | 1 NUP155        | K14312 |
| ENSG00000151151 | -0.009677 | 5.382551 | 0.992786 | 1 IPMK          | K00915 |
| ENSG00000100030 | 0.006692  | 7.203155 | 0.992816 | 1 MAPK1         | K04371 |
| ENSG00000143514 | -0.009395 | 5.390937 | 0.99283  | 1 TP53BP2       | K16823 |
| ENSG00000146063 | -0.009395 | 5.390937 | 0.99283  | 1 TRIM41        | K12017 |
| ENSG00000090316 | -0.007063 | 5.981338 | 0.992837 | 1 MAEA          | -      |
| ENSG00000125170 | 0.009555  | 5.39406  | 0.992845 | 1 DOK4          | -      |
| ENSG00000163935 | -0.011748 | 4.389247 | 0.992865 | 1 SFMBT1        | -      |
| ENSG00000135040 | -0.008703 | 5.411689 | 0.992931 | 1 NAA35         | -      |
| ENSG00000166595 | 0.009974  | 5.41477  | 0.992945 | 1 FAM96B        | -      |
| ENSG00000149532 | -0.007273 | 6.483846 | 0.992954 | 1 CPSF7         | K14398 |
| ENSG00000130811 | 0.006451  | 7.320021 | 0.993033 | 1 EIF3G         | K03248 |
| ENSG00000126254 | 0.006889  | 6.627873 | 0.993058 | 1 RBM42         | -      |
| ENSG00000110274 | -0.01031  | 4.430497 | 0.993062 | 1 CEP164        | K16462 |
| ENSG00000269131 | -0.013736 | 4.448708 | 0.993143 | 1 AC004447.2    | -      |
| ENSG00000100941 | 0.006082  | 7.590752 | 0.993326 | 1 PNN           | K13114 |
| ENSG00000166200 | -0.006131 | 7.607877 | 0.993354 | 1 COPS2         | K12176 |
| ENSG00000104388 | 0.005982  | 7.77383  | 0.993358 | 1 RAB2A         | K07877 |
| ENSG00000123349 | -0.005807 | 8.331533 | 0.993418 | 1 PFDN5         | K04797 |
| ENSG00000069869 | 0.008174  | 5.51983  | 0.993431 | 1 NEDD4         | K10591 |
| ENSG00000068489 | -0.008556 | 5.535986 | 0.993504 | 1 PRR11         | -      |
| ENSG00000167797 | 0.012114  | 4.530527 | 0.993521 | 1 CDK2AP2       | -      |

|                 |           |          |          |                |        |
|-----------------|-----------|----------|----------|----------------|--------|
| ENSG00000100416 | 0.007575  | 6.134044 | 0.993554 | 1 TRMU         | K00566 |
| ENSG00000068878 | 0.006412  | 6.684399 | 0.993582 | 1 PSME4        | K06699 |
| ENSG00000164039 | 0.012533  | 4.553119 | 0.993615 | 1 BDH2         | K00019 |
| ENSG00000169567 | -0.00563  | 8.227687 | 0.993671 | 1 HINT1        | K02503 |
| ENSG00000196236 | -0.009404 | 4.571804 | 0.993706 | 1 XPNPEP3      | K01262 |
| ENSG00000165434 | 0.009274  | 4.577222 | 0.993729 | 1 PGM2L1       | K11809 |
| ENSG00000160908 | 0.009574  | 4.591844 | 0.993795 | 1 ZNF394       | K09229 |
| ENSG00000179271 | 0.005717  | 7.471025 | 0.993836 | 1 GADD45GIP1   | -      |
| ENSG00000181904 | -0.006968 | 6.224762 | 0.993945 | 1 C5orf24      | K12581 |
| ENSG00000088930 | 0.00589   | 6.905006 | 0.994017 | 1 XRN2         | K12619 |
| ENSG00000124608 | 0.007238  | 4.650658 | 0.994026 | 1 AARS2        | K01872 |
| ENSG00000198131 | 0.005824  | 5.660868 | 0.994042 | 1 ZNF544       | K09228 |
| ENSG00000103855 | -0.005583 | 7.457558 | 0.994113 | 1 CD276        | K06746 |
| ENSG00000124155 | -0.005591 | 7.285522 | 0.994222 | 1 PIGT         | K05292 |
| ENSG00000059573 | 0.005369  | 7.539572 | 0.994222 | 1 ALDH18A1     | K12657 |
| ENSG00000156873 | 0.011646  | 4.697027 | 0.994222 | 1 PHKG2        | K00871 |
| ENSG00000168488 | 0.006197  | 6.285653 | 0.994291 | 1 ATXN2L       | -      |
| ENSG00000106261 | 0.007272  | 5.725291 | 0.994302 | 1 ZKSCAN1      | K09229 |
| ENSG00000085832 | 0.007344  | 5.728603 | 0.994312 | 1 EPS15        | K12472 |
| ENSG00000198146 | 0.007417  | 5.731908 | 0.99433  | 1 ZNF770       | K17985 |
| ENSG00000113851 | -0.007775 | 4.727232 | 0.994334 | 1 CRBN         | K11793 |
| ENSG00000161847 | 0.009122  | 4.738702 | 0.994388 | 1 RAVR1        | -      |
| ENSG00000205155 | 0.009122  | 4.738702 | 0.994388 | 1 PSENN        | K06170 |
| ENSG00000120833 | -0.006929 | 4.753479 | 0.994441 | 1 SOCS2        | K04695 |
| ENSG00000163808 | -0.008847 | 4.79357  | 0.994595 | 1 KIF15        | K10400 |
| ENSG0000011258  | 0.008238  | 4.847819 | 0.994787 | 1 MBTD1        | -      |
| ENSG00000187266 | -0.010034 | 4.850926 | 0.994802 | 1 EPOR         | K05079 |
| ENSG00000108021 | 0.005705  | 6.312938 | 0.994854 | 1 FAM208B      | -      |
| ENSG00000214253 | -0.005249 | 5.902156 | 0.994955 | 1 FIS1         | K17969 |
| ENSG00000054116 | 0.005419  | 6.522564 | 0.994956 | 1 TRAPPC3      | -      |
| ENSG00000101146 | -0.007669 | 5.918195 | 0.995012 | 1 RAE1         | K14298 |
| ENSG00000114867 | 0.004327  | 8.876277 | 0.995022 | 1 EIF4G1       | K03260 |
| ENSG00000134686 | -0.004628 | 5.922545 | 0.995026 | 1 PHC2         | K11457 |
| ENSG00000142039 | -0.007481 | 4.927851 | 0.995064 | 1 CCDC97       | -      |
| ENSG00000110917 | -0.004789 | 7.46726  | 0.995075 | 1 MLEC         | -      |
| ENSG00000224032 | 0.008784  | 5.010403 | 0.995338 | 1 EPB41L4A-AS1 | -      |
| ENSG00000188290 | -0.005455 | 6.345091 | 0.995348 | 1 HES4         | K09089 |
| ENSG00000164024 | 0.005231  | 6.339717 | 0.995396 | 1 METAP1       | K01265 |
| ENSG00000165669 | 0.009344  | 5.037363 | 0.995423 | 1 FAM204A      | -      |
| ENSG00000135801 | 0.009562  | 5.048007 | 0.995458 | 1 TAF5L        | K03130 |
| ENSG00000174165 | 0.009562  | 5.048007 | 0.995458 | 1 ZDHHC24      | K18932 |
| ENSG0000015676  | -0.006091 | 6.055085 | 0.995462 | 1 NUDCD3       | -      |
| ENSG00000197043 | 0.00445   | 7.209085 | 0.995541 | 1 ANXA6        | K17094 |
| ENSG00000138496 | 0.005046  | 5.08208  | 0.995561 | 1 PARP9        | K15260 |
| ENSG00000160972 | -0.004732 | 6.099255 | 0.995598 | 1 PPP1R16A     | K17458 |
| ENSG00000055950 | 0.006853  | 6.101199 | 0.995603 | 1 MRPL43       | K17424 |
| ENSG00000127616 | 0.004269  | 7.409405 | 0.995636 | 1 SMARCA4      | K11647 |
| ENSG00000159140 | -0.003928 | 7.990338 | 0.995843 | 1 SON          | -      |
| ENSG00000112078 | 0.004695  | 6.491704 | 0.99587  | 1 KCTD20       | -      |
| ENSG00000101577 | -0.006853 | 5.194157 | 0.995893 | 1 LPIN2        | K15728 |
| ENSG00000149798 | -0.006701 | 5.19894  | 0.995902 | 1 CDC42EP2     | -      |
| ENSG00000128989 | -0.004093 | 7.47394  | 0.995918 | 1 ARPP19       | -      |
| ENSG00000174939 | -0.008901 | 5.204901 | 0.995921 | 1 ASPHD1       | -      |
| ENSG00000233137 | -0.004652 | 6.223595 | 0.995961 | 1 RP11-220I1.1 | -      |
| ENSG00000112242 | -0.004468 | 6.26809  | 0.996082 | 1 E2F3         | K06620 |
| ENSG00000095059 | -0.004848 | 6.329363 | 0.996106 | 1 DHPS         | K00809 |
| ENSG00000168884 | -0.006355 | 5.283566 | 0.996136 | 1 TNIP2        | -      |
| ENSG00000119139 | 0.004924  | 5.282428 | 0.996136 | 1 TJP2         | -      |

|                 |           |          |          |                 |        |
|-----------------|-----------|----------|----------|-----------------|--------|
| ENSG00000115446 | -0.007419 | 5.320251 | 0.996235 | 1 UNC50         | -      |
| ENSG00000182224 | -0.007278 | 5.324635 | 0.996243 | 1 CYB5D1        | K11642 |
| ENSG00000196975 | 0.004338  | 6.517304 | 0.996276 | 1 ANXA4         | K17093 |
| ENSG00000160131 | -0.004512 | 6.510075 | 0.996276 | 1 VMA21         | -      |
| ENSG00000063177 | -0.003238 | 9.339806 | 0.996296 | 1 RPL18         | K02883 |
| ENSG00000112079 | -0.00449  | 6.478455 | 0.996343 | 1 STK38         | K08790 |
| ENSG00000166508 | 0.003321  | 8.493421 | 0.996344 | 1 MCM7          | K02210 |
| ENSG00000131584 | 0.005023  | 5.379386 | 0.996382 | 1 ACAP3         | K12489 |
| ENSG00000120539 | 0.004295  | 6.30019  | 0.996583 | 1 MASTL         | K16309 |
| ENSG00000101868 | -0.004048 | 6.733819 | 0.996585 | 1 POLA1         | K02320 |
| ENSG00000169217 | -0.004788 | 5.471227 | 0.996605 | 1 CD2BP2        | K13099 |
| ENSG00000143493 | 0.005478  | 5.485979 | 0.996637 | 1 INTS7         | K13144 |
| ENSG00000111300 | 0.004106  | 6.338088 | 0.996764 | 1 NAA25         | K17973 |
| ENSG00000065883 | -0.005407 | 5.576068 | 0.996842 | 1 CDK13         | K08819 |
| ENSG00000166881 | -0.00393  | 6.622503 | 0.996851 | 1 TMEM194A      | -      |
| ENSG00000074201 | 0.003222  | 7.387827 | 0.996922 | 1 CLNS1A        | K05019 |
| ENSG00000119844 | 0.004755  | 5.615071 | 0.996925 | 1 AFTPH         | -      |
| ENSG00000177613 | -0.004558 | 5.662593 | 0.997024 | 1 CSTF2T        | K14407 |
| ENSG00000149923 | 0.003027  | 5.879999 | 0.997439 | 1 PPP4C         | K15423 |
| ENSG00000055332 | -0.003506 | 6.511521 | 0.997498 | 1 EIF2AK2       | K16195 |
| ENSG00000173456 | 0.003966  | 5.918215 | 0.997504 | 1 RNF26         | K15693 |
| ENSG00000128944 | -0.002841 | 7.161443 | 0.997663 | 1 KNSTRN        | -      |
| ENSG00000124333 | -0.003468 | 6.098618 | 0.997797 | 1 VAMP7         | K08515 |
| ENSG00000198218 | -0.004577 | 6.104364 | 0.997806 | 1 QRICH1        | -      |
| ENSG00000007080 | -0.003049 | 6.652459 | 0.997888 | 1 CCDC124       | K12581 |
| ENSG00000171928 | 0.003474  | 6.266403 | 0.998038 | 1 TVP23B        | -      |
| ENSG00000188895 | 0.002379  | 7.074335 | 0.998156 | 1 MSL1          | K13163 |
| ENSG00000110330 | 0.002523  | 6.827564 | 0.99818  | 1 BIRC2         | K16060 |
| ENSG00000213585 | 0.001721  | 8.905273 | 0.998197 | 1 VDAC1         | K05862 |
| ENSG00000182087 | 0.001842  | 7.753019 | 0.998414 | 1 TMEM259       | -      |
| ENSG00000065809 | -0.002308 | 6.900207 | 0.998536 | 1 FAM107B       | -      |
| ENSG00000160213 | -0.002374 | 6.73465  | 0.99862  | 1 CSTB          | K13907 |
| ENSG00000157020 | 0.001398  | 7.294522 | 0.999202 | 1 SEC13         | K14004 |
| ENSG00000160679 | -0.001669 | 6.948233 | 0.999269 | 1 CHTOP         | K09228 |
| ENSG00000205913 | 0.038659  | 0.986652 | 1        | 1 SRRM2-AS1     | -      |
| ENSG00000103599 | -0.028133 | 1.474493 | 1        | 1 IQCH          | -      |
| ENSG00000067221 | -0.023356 | 2.134172 | 1        | 1 STOML1        | -      |
| ENSG00000177721 | 0.018365  | 2.152261 | 1        | 1 ANXA2R        | -      |
| ENSG00000272462 | 0.018365  | 2.152261 | 1        | 1 U91328.19     | -      |
| ENSG00000234771 | 0.017768  | 2.112278 | 1        | 1 RP11-395P17.3 | -      |
| ENSG00000169814 | -0.005977 | 3.572418 | 1        | 1 BTD           | K01435 |
| ENSG00000260114 | -0.117956 | 0.883016 | 1        | 1 CTD-2574D22.4 | -      |
| ENSG00000262185 | -0.117956 | 0.883016 | 1        | 1 RP11-462G12.1 | -      |
| ENSG00000142347 | -0.11215  | 0.406004 | 1        | 1 MYO1F         | K10356 |
| ENSG00000145736 | -0.11215  | 0.406004 | 1        | 1 GTF2H2        | K08857 |
| ENSG00000187736 | -0.11215  | 0.406004 | 1        | 1 NHEJ1         | K10980 |
| ENSG00000241043 | -0.11215  | 0.406004 | 1        | 1 GVQW1         | K02311 |
| ENSG00000259153 | -0.11215  | 0.406004 | 1        | 1 RP6-65G23.3   | -      |
| ENSG00000261589 | -0.11215  | 0.406004 | 1        | 1 CTC-462L7.1   | -      |
| ENSG00000100890 | 0.11192   | 0.420428 | 1        | 1 KIAA0391      | K17655 |
| ENSG00000102385 | 0.11192   | 0.420428 | 1        | 1 DRP2          | -      |
| ENSG00000151474 | 0.11192   | 0.420428 | 1        | 1 FRMD4A        | -      |
| ENSG00000164707 | 0.11192   | 0.420428 | 1        | 1 SLC13A4       | K14444 |
| ENSG00000198518 | 0.11192   | 0.420428 | 1        | 1 HIST1H4E      | K11254 |
| ENSG00000227986 | 0.11192   | 0.420428 | 1        | 1 TRIM60P18     | K12029 |
| ENSG00000070087 | 0.105175  | 0.545937 | 1        | 1 PFN2          | K05759 |
| ENSG00000070388 | 0.105175  | 0.545937 | 1        | 1 FGF22         | K04358 |
| ENSG00000080298 | 0.105175  | 0.545937 | 1        | 1 RFX3          | K09173 |

|                 |           |           |   |                  |        |
|-----------------|-----------|-----------|---|------------------|--------|
| ENSG00000253616 | 0.105175  | 0.545937  | 1 | 1 RP11-875O11.3  | -      |
| ENSG00000254979 | 0.105175  | 0.545937  | 1 | 1 RP11-872D17.8  | K08230 |
| ENSG00000255242 | 0.105175  | 0.545937  | 1 | 1 C14orf169      | -      |
| ENSG00000258366 | 0.105175  | 0.545937  | 1 | 1 RTEL1          | K11136 |
| ENSG00000269486 | 0.105175  | 0.545937  | 1 | 1 CTC-360G5.9    | -      |
| ENSG00000269867 | 0.105175  | 0.545937  | 1 | 1 CTD-2583A14.8  | -      |
| ENSG00000273270 | 0.105175  | 0.545937  | 1 | 1 RP11-212P7.2   | -      |
| ENSG00000187105 | 0.090792  | 0.86781   | 1 | 1 HEATR4         | -      |
| ENSG00000213846 | 0.090792  | 0.86781   | 1 | 1 AC098614.2     | K10375 |
| ENSG00000232284 | 0.090792  | 0.86781   | 1 | 1 GNG12-AS1      | -      |
| ENSG00000185046 | -0.076099 | 0.755352  | 1 | 1 ANKS1B         | -      |
| ENSG00000234684 | -0.076099 | 0.755352  | 1 | 1 SDCBP2-AS1     | -      |
| ENSG00000261761 | -0.076099 | 0.755352  | 1 | 1 RP11-103J17.2  | -      |
| ENSG00000272604 | -0.076099 | 0.755352  | 1 | 1 RP11-251G23.5  | -      |
| ENSG00000186153 | -0.067627 | 0.8553    | 1 | 1 WWOX           | K19329 |
| ENSG00000261971 | -0.067627 | 0.8553    | 1 | 1 RP11-473M20.7  | -      |
| ENSG00000172458 | 0.038643  | 0.895389  | 1 | 1 IL17D          | -      |
| ENSG00000181826 | 0.038581  | 0.580883  | 1 | 1 RELL1          | -      |
| ENSG00000198929 | 0.038581  | 0.580883  | 1 | 1 NOS1AP         | K16513 |
| ENSG00000254469 | 0.038581  | 0.580883  | 1 | 1 RP11-849H4.2   | K04965 |
| ENSG00000260083 | 0.038581  | 0.580883  | 1 | 1 MIR4519        | -      |
| ENSG00000099889 | -0.016081 | 3.692759  | 1 | 1 ARVCF          | -      |
| ENSG00000165121 | -0.011731 | 2.422547  | 1 | 1 RP11-213G2.3   | K10395 |
| ENSG00000077782 | 0.011383  | 3.69236   | 1 | 1 FGFR1          | K04362 |
| ENSG00000167642 | -0.009794 | 3.675608  | 1 | 1 SPINT2         | -      |
| ENSG00000068976 | 0.162062  | -0.231544 | 1 | 1 PYGM           | K00688 |
| ENSG00000116128 | 0.162062  | -0.231544 | 1 | 1 BCL9           | -      |
| ENSG00000135835 | 0.162062  | -0.231544 | 1 | 1 KIAA1614       | -      |
| ENSG00000143552 | 0.162062  | -0.231544 | 1 | 1 NUP210L        | K14314 |
| ENSG00000147003 | 0.162062  | -0.231544 | 1 | 1 TMEM27         | -      |
| ENSG00000180425 | 0.162062  | -0.231544 | 1 | 1 C11orf71       | -      |
| ENSG00000197122 | 0.162062  | -0.231544 | 1 | 1 SRC            | K05704 |
| ENSG00000224536 | 0.162062  | -0.231544 | 1 | 1 RP11-134G8.7   | -      |
| ENSG00000248866 | 0.162062  | -0.231544 | 1 | 1 USP46-AS1      | -      |
| ENSG00000255867 | 0.162062  | -0.231544 | 1 | 1 DENND5B-AS1    | -      |
| ENSG00000257557 | 0.162062  | -0.231544 | 1 | 1 RP11-84G21.1   | -      |
| ENSG00000272301 | 0.162062  | -0.231544 | 1 | 1 RP11-111M22.4  | -      |
| ENSG00000124920 | 0.038796  | 2.395936  | 1 | 1 MYRF           | -      |
| ENSG00000245213 | 0.038765  | 1.927668  | 1 | 1 RP11-10K16.1   | -      |
| ENSG00000135925 | 0.038342  | -0.170038 | 1 | 1 WNT10A         | K13194 |
| ENSG00000142530 | 0.038342  | -0.170038 | 1 | 1 FAM71E1        | -      |
| ENSG00000151150 | 0.038342  | -0.170038 | 1 | 1 ANK3           | K10380 |
| ENSG00000167037 | 0.038342  | -0.170038 | 1 | 1 SGSM1          | -      |
| ENSG00000183889 | 0.038342  | -0.170038 | 1 | 1 NPIPA7         | K04985 |
| ENSG00000187024 | 0.038342  | -0.170038 | 1 | 1 PTRH1          | K01056 |
| ENSG00000187984 | 0.038342  | -0.170038 | 1 | 1 ANKRD19P       | K17299 |
| ENSG00000197837 | 0.038342  | -0.170038 | 1 | 1 HIST4H4        | -      |
| ENSG00000204882 | 0.038342  | -0.170038 | 1 | 1 GPR20          | K04317 |
| ENSG00000204920 | 0.038342  | -0.170038 | 1 | 1 ZNF155         | -      |
| ENSG00000233058 | 0.038342  | -0.170038 | 1 | 1 LINC00884      | -      |
| ENSG00000254206 | 0.038342  | -0.170038 | 1 | 1 NPIP11         | K01896 |
| ENSG00000257740 | 0.038342  | -0.170038 | 1 | 1 RP11-977G19.12 | -      |
| ENSG00000268087 | 0.038342  | -0.170038 | 1 | 1 CTC-429P9.2    | -      |
| ENSG00000270964 | 0.038342  | -0.170038 | 1 | 1 RP11-502I4.3   | -      |
| ENSG00000273117 | 0.038342  | -0.170038 | 1 | 1 AC144652.1     | -      |
| ENSG00000137821 | -0.034979 | 1.342723  | 1 | 1 LRRC49         | K16606 |
| ENSG00000148291 | -0.034979 | 1.342723  | 1 | 1 SURF2          | -      |
| ENSG00000158406 | -0.034979 | 1.342723  | 1 | 1 HIST1H4H       | K11254 |

|                 |           |           |   |                 |        |
|-----------------|-----------|-----------|---|-----------------|--------|
| ENSG00000186141 | -0.034979 | 1.342723  | 1 | 1 POLR3C        | K03023 |
| ENSG00000108733 | 0.028269  | 3.080035  | 1 | 1 PEX12         | K13345 |
| ENSG00000137267 | 0.019485  | 3.204383  | 1 | 1 TUBB2A        | K07375 |
| ENSG00000234171 | -0.013963 | 3.081031  | 1 | 1 RNASEH1-AS1   | -      |
| ENSG00000143375 | 0.009518  | 3.190255  | 1 | 1 CGN           | K06102 |
| ENSG00000089916 | -0.008912 | 4.586479  | 1 | 1 GPATCH2L      | K17569 |
| ENSG00000172113 | -0.006566 | 3.963915  | 1 | 1 NME6          | K00940 |
| ENSG00000115282 | 0.006202  | 4.024319  | 1 | 1 TTC31         | -      |
| ENSG00000184277 | 0.005511  | 4.405773  | 1 | 1 TM2D3         | -      |
| ENSG00000197429 | 0.005442  | 3.006105  | 1 | 1 IPP           | K13956 |
| ENSG00000244165 | 0.005442  | 3.006105  | 1 | 1 P2RY11        | K08387 |
| ENSG00000257732 | 0.005442  | 3.006105  | 1 | 1 RP11-818F20.5 | -      |
| ENSG00000108528 | -0.00333  | 6.059043  | 1 | 1 SLC25A11      | K15104 |
| ENSG00000112182 | -0.144529 | 0.68026   | 1 | 1 BACH2         | K09042 |
| ENSG00000120049 | -0.144529 | 0.68026   | 1 | 1 KCNIP2        | -      |
| ENSG00000121653 | -0.144529 | 0.68026   | 1 | 1 MAPK8IP1      | K04434 |
| ENSG00000141028 | -0.144529 | 0.68026   | 1 | 1 CDRT15P1      | -      |
| ENSG00000142065 | -0.144529 | 0.68026   | 1 | 1 ZFP14         | K09228 |
| ENSG00000175449 | -0.144529 | 0.68026   | 1 | 1 RFESD         | -      |
| ENSG00000213261 | -0.144529 | 0.68026   | 1 | 1 AC093106.7    | K03232 |
| ENSG00000249550 | -0.144529 | 0.68026   | 1 | 1 RP11-438N16.1 | -      |
| ENSG00000250222 | -0.144529 | 0.68026   | 1 | 1 CTC-338M12.5  | -      |
| ENSG00000273137 | -0.144529 | 0.68026   | 1 | 1 RP3-402G11.28 | -      |
| ENSG00000125378 | 0.09957   | 0.661394  | 1 | 1 BMP4          | K04662 |
| ENSG00000127366 | 0.09957   | 0.661394  | 1 | 1 TAS2R5        | K08474 |
| ENSG00000157150 | 0.09957   | 0.661394  | 1 | 1 TIMP4         | -      |
| ENSG00000175730 | 0.09957   | 0.661394  | 1 | 1 BAK1P1        | K14021 |
| ENSG00000187492 | 0.09957   | 0.661394  | 1 | 1 CDHR4         | K16504 |
| ENSG00000241343 | 0.09957   | 0.661394  | 1 | 1 RPL36A        | K02929 |
| ENSG00000196421 | -0.086037 | 0.647996  | 1 | 1 LINC00176     | -      |
| ENSG00000248121 | -0.086037 | 0.647996  | 1 | 1 SMURF2P1      | K04678 |
| ENSG00000254198 | -0.086037 | 0.647996  | 1 | 1 RP11-598P20.3 | -      |
| ENSG00000256673 | -0.086037 | 0.647996  | 1 | 1 RP11-599J14.2 | -      |
| ENSG00000268189 | -0.086037 | 0.647996  | 1 | 1 AC005785.2    | -      |
| ENSG00000128564 | -0.042578 | 2.471897  | 1 | 1 VGF           | -      |
| ENSG00000168152 | -0.042578 | 2.471897  | 1 | 1 THAP9         | K12606 |
| ENSG00000156510 | -0.039043 | 2.222042  | 1 | 1 HKDC1         | K00844 |
| ENSG0000019169  | 0.022528  | 2.469609  | 1 | 1 MARCO         | K13884 |
| ENSG00000131979 | -0.019324 | 3.421207  | 1 | 1 GCH1          | K01495 |
| ENSG00000265415 | 0.013622  | 3.40413   | 1 | 1 CTD-2510F5.4  | -      |
| ENSG00000266962 | -0.013585 | 3.759006  | 1 | 1 RP11-400F19.6 | -      |
| ENSG00000136052 | -0.008429 | 4.361758  | 1 | 1 SLC41A2       | K15122 |
| ENSG00000174749 | 0.007456  | 4.300636  | 1 | 1 C4orf32       | K12581 |
| ENSG00000149596 | 0.006286  | 4.608138  | 1 | 1 JPH2          | K19530 |
| ENSG00000162378 | -0.003847 | 4.507671  | 1 | 1 ZYG11B        | K10350 |
| ENSG00000173264 | 0.003247  | 4.48038   | 1 | 1 GPR137        | -      |
| ENSG00000107185 | -0.001655 | 5.441259  | 1 | 1 RGP1          | -      |
| ENSG00000004939 | 3.724485  | -2.294189 | 1 | 1 SLC4A1        | K06573 |
| ENSG00000005469 | 3.724485  | -2.294189 | 1 | 1 CROT          | K05940 |
| ENSG00000006555 | 3.724485  | -2.294189 | 1 | 1 TTC22         | -      |
| ENSG00000009709 | 3.724485  | -2.294189 | 1 | 1 PAX7          | K09381 |
| ENSG00000010626 | 3.724485  | -2.294189 | 1 | 1 LRRC23        | -      |
| ENSG00000018869 | 3.724485  | -2.294189 | 1 | 1 ZNF582        | K09228 |
| ENSG00000026559 | 3.724485  | -2.294189 | 1 | 1 KCNG1         | K04900 |
| ENSG00000028137 | 3.724485  | -2.294189 | 1 | 1 TNFRSF1B      | K05141 |
| ENSG00000048545 | 3.724485  | -2.294189 | 1 | 1 GUCA1A        | K08328 |
| ENSG00000052850 | 3.724485  | -2.294189 | 1 | 1 ALX4          | K09451 |
| ENSG00000055732 | 3.724485  | -2.294189 | 1 | 1 MCOLN3        | K04994 |

|                 |          |           |   |            |        |
|-----------------|----------|-----------|---|------------|--------|
| ENSG00000058404 | 3.724485 | -2.294189 | 1 | 1 CAMK2B   | K04515 |
| ENSG00000060709 | 3.724485 | -2.294189 | 1 | 1 RIMBP2   | K17591 |
| ENSG00000064886 | 3.724485 | -2.294189 | 1 | 1 CHI3L2   | K17523 |
| ENSG00000066032 | 3.724485 | -2.294189 | 1 | 1 CTNNA2   | K05691 |
| ENSG00000066056 | 3.724485 | -2.294189 | 1 | 1 TIE1     | K05120 |
| ENSG00000067715 | 3.724485 | -2.294189 | 1 | 1 SYT1     | K15290 |
| ENSG00000071282 | 3.724485 | -2.294189 | 1 | 1 LMCD1    | -      |
| ENSG00000074935 | 3.724485 | -2.294189 | 1 | 1 TUBE1    | K10391 |
| ENSG00000075884 | 3.724485 | -2.294189 | 1 | 1 ARHGAP15 | -      |
| ENSG00000078018 | 3.724485 | -2.294189 | 1 | 1 MAP2     | K10430 |
| ENSG00000080561 | 3.724485 | -2.294189 | 1 | 1 MID2     | K10647 |
| ENSG00000081138 | 3.724485 | -2.294189 | 1 | 1 CDH7     | K06799 |
| ENSG00000081148 | 3.724485 | -2.294189 | 1 | 1 IMPG2    | K19017 |
| ENSG00000081248 | 3.724485 | -2.294189 | 1 | 1 CACNA1S  | K04857 |
| ENSG00000083290 | 3.724485 | -2.294189 | 1 | 1 ULK2     | K08269 |
| ENSG00000083814 | 3.724485 | -2.294189 | 1 | 1 ZNF671   | K09228 |
| ENSG00000099937 | 3.724485 | -2.294189 | 1 | 1 SERPIND1 | K03912 |
| ENSG00000099954 | 3.724485 | -2.294189 | 1 | 1 CECR2    | -      |
| ENSG00000100362 | 3.724485 | -2.294189 | 1 | 1 PVALB    | -      |
| ENSG00000100427 | 3.724485 | -2.294189 | 1 | 1 MLC1     | -      |
| ENSG00000100628 | 3.724485 | -2.294189 | 1 | 1 ASB2     | K10324 |
| ENSG00000100652 | 3.724485 | -2.294189 | 1 | 1 SLC10A1  | K14341 |
| ENSG00000101082 | 3.724485 | -2.294189 | 1 | 1 SLA2     | K11447 |
| ENSG00000101203 | 3.724485 | -2.294189 | 1 | 1 COL20A1  | -      |
| ENSG00000101336 | 3.724485 | -2.294189 | 1 | 1 HCK      | K08893 |
| ENSG00000101443 | 3.724485 | -2.294189 | 1 | 1 WFDC2    | -      |
| ENSG00000101542 | 3.724485 | -2.294189 | 1 | 1 CDH20    | K06807 |
| ENSG00000102466 | 3.724485 | -2.294189 | 1 | 1 FGF14    | K04358 |
| ENSG00000102678 | 3.724485 | -2.294189 | 1 | 1 FGF9     | K04358 |
| ENSG00000102802 | 3.724485 | -2.294189 | 1 | 1 MEDAG    | -      |
| ENSG00000102837 | 3.724485 | -2.294189 | 1 | 1 OLFM4    | K04592 |
| ENSG00000103490 | 3.724485 | -2.294189 | 1 | 1 PYCARD   | K12799 |
| ENSG00000104848 | 3.724485 | -2.294189 | 1 | 1 KCNA7    | K04880 |
| ENSG00000104921 | 3.724485 | -2.294189 | 1 | 1 FCER2    | K06468 |
| ENSG00000105374 | 3.724485 | -2.294189 | 1 | 1 NKG7     | -      |
| ENSG00000105409 | 3.724485 | -2.294189 | 1 | 1 ATP1A3   | K01539 |
| ENSG00000105605 | 3.724485 | -2.294189 | 1 | 1 CACNG7   | K04872 |
| ENSG00000105784 | 3.724485 | -2.294189 | 1 | 1 RUNDC3B  | K05659 |
| ENSG00000106327 | 3.724485 | -2.294189 | 1 | 1 TFR2     | -      |
| ENSG00000106927 | 3.724485 | -2.294189 | 1 | 1 AMBP     | -      |
| ENSG00000107485 | 3.724485 | -2.294189 | 1 | 1 GATA3    | K17895 |
| ENSG00000108452 | 3.724485 | -2.294189 | 1 | 1 ZNF29P   | K09228 |
| ENSG00000110328 | 3.724485 | -2.294189 | 1 | 1 GALNT18  | K00710 |
| ENSG00000111218 | 3.724485 | -2.294189 | 1 | 1 PRMT8    | K11439 |
| ENSG00000111305 | 3.724485 | -2.294189 | 1 | 1 GSG1     | -      |
| ENSG00000111665 | 3.724485 | -2.294189 | 1 | 1 CDCA3    | K07825 |
| ENSG00000112299 | 3.724485 | -2.294189 | 1 | 1 VNN1     | K08069 |
| ENSG00000114547 | 3.724485 | -2.294189 | 1 | 1 ROPN1B   | -      |
| ENSG00000115386 | 3.724485 | -2.294189 | 1 | 1 REG1A    | -      |
| ENSG00000115461 | 3.724485 | -2.294189 | 1 | 1 IGFBP5   | K10138 |
| ENSG00000116157 | 3.724485 | -2.294189 | 1 | 1 GPX7     | K00432 |
| ENSG00000116544 | 3.724485 | -2.294189 | 1 | 1 DLGAP3   | K15008 |
| ENSG00000116771 | 3.724485 | -2.294189 | 1 | 1 AGMAT    | K01480 |
| ENSG00000117215 | 3.724485 | -2.294189 | 1 | 1 PLA2G2D  | K01047 |
| ENSG00000118004 | 3.724485 | -2.294189 | 1 | 1 COLEC11  | K10066 |
| ENSG00000118017 | 3.724485 | -2.294189 | 1 | 1 A4GNT    | K08251 |
| ENSG00000118473 | 3.724485 | -2.294189 | 1 | 1 SGIP1    | -      |
| ENSG00000118514 | 3.724485 | -2.294189 | 1 | 1 ALDH8A1  | -      |



|                 |          |           |   |            |        |
|-----------------|----------|-----------|---|------------|--------|
| ENSG00000118785 | 3.724485 | -2.294189 | 1 | 1 SPP1     | K06250 |
| ENSG00000119283 | 3.724485 | -2.294189 | 1 | 1 TRIM67   | K10649 |
| ENSG00000120337 | 3.724485 | -2.294189 | 1 | 1 TNFSF18  | K05479 |
| ENSG00000122718 | 3.724485 | -2.294189 | 1 | 1 OR2S2    | K04257 |
| ENSG00000124194 | 3.724485 | -2.294189 | 1 | 1 GDAP1L1  | -      |
| ENSG00000124701 | 3.724485 | -2.294189 | 1 | 1 APOBEC2  | K18772 |
| ENSG00000124731 | 3.724485 | -2.294189 | 1 | 1 TREM1    | K14362 |
| ENSG00000124935 | 3.724485 | -2.294189 | 1 | 1 SCGB1D2  | -      |
| ENSG00000125245 | 3.724485 | -2.294189 | 1 | 1 GPR18    | K08410 |
| ENSG00000125337 | 3.724485 | -2.294189 | 1 | 1 KIF25    | K18627 |
| ENSG00000125735 | 3.724485 | -2.294189 | 1 | 1 TNFSF14  | K05477 |
| ENSG00000126952 | 3.724485 | -2.294189 | 1 | 1 NXF5     | K14284 |
| ENSG00000127083 | 3.724485 | -2.294189 | 1 | 1 OMD      | K08124 |
| ENSG00000127362 | 3.724485 | -2.294189 | 1 | 1 TAS2R3   | K08474 |
| ENSG00000128594 | 3.724485 | -2.294189 | 1 | 1 LRRC4    | K16351 |
| ENSG00000128604 | 3.724485 | -2.294189 | 1 | 1 IRF5     | K09446 |
| ENSG00000129538 | 3.724485 | -2.294189 | 1 | 1 RNASE1   | K01168 |
| ENSG00000129673 | 3.724485 | -2.294189 | 1 | 1 AANAT    | K00669 |
| ENSG00000130055 | 3.724485 | -2.294189 | 1 | 1 GDPD2    | K01124 |
| ENSG00000130300 | 3.724485 | -2.294189 | 1 | 1 PLVAP    | K17309 |
| ENSG00000130649 | 3.724485 | -2.294189 | 1 | 1 CYP2E1   | K07415 |
| ENSG00000131379 | 3.724485 | -2.294189 | 1 | 1 C3orf20  | -      |
| ENSG00000131620 | 3.724485 | -2.294189 | 1 | 1 ANO1     | K19496 |
| ENSG00000131781 | 3.724485 | -2.294189 | 1 | 1 FMO5     | K00485 |
| ENSG00000132164 | 3.724485 | -2.294189 | 1 | 1 SLC6A11  | K05039 |
| ENSG00000132855 | 3.724485 | -2.294189 | 1 | 1 ANGPTL3  | -      |
| ENSG00000132874 | 3.724485 | -2.294189 | 1 | 1 SLC14A2  | K08716 |
| ENSG00000133110 | 3.724485 | -2.294189 | 1 | 1 POSTN    | -      |
| ENSG00000133138 | 3.724485 | -2.294189 | 1 | 1 TBC1D8B  | -      |
| ENSG00000133739 | 3.724485 | -2.294189 | 1 | 1 LRRCC1   | K16475 |
| ENSG00000134160 | 3.724485 | -2.294189 | 1 | 1 TRPM1    | K04976 |
| ENSG00000134398 | 3.724485 | -2.294189 | 1 | 1 ERN2     | K11715 |
| ENSG00000134757 | 3.724485 | -2.294189 | 1 | 1 DSG3     | K07598 |
| ENSG00000134874 | 3.724485 | -2.294189 | 1 | 1 DZIP1    | K16470 |
| ENSG00000134955 | 3.724485 | -2.294189 | 1 | 1 SLC37A2  | K13783 |
| ENSG00000135226 | 3.724485 | -2.294189 | 1 | 1 UGT2B28  | K00699 |
| ENSG00000135363 | 3.724485 | -2.294189 | 1 | 1 LMO2     | K15612 |
| ENSG00000136193 | 3.724485 | -2.294189 | 1 | 1 SCRNI    | K14358 |
| ENSG00000136275 | 3.724485 | -2.294189 | 1 | 1 C7orf69  | -      |
| ENSG00000136541 | 3.724485 | -2.294189 | 1 | 1 ERMN     | -      |
| ENSG00000136689 | 3.724485 | -2.294189 | 1 | 1 IL1RN    | K05481 |
| ENSG00000136872 | 3.724485 | -2.294189 | 1 | 1 ALDOB    | K01623 |
| ENSG00000138039 | 3.724485 | -2.294189 | 1 | 1 LHCGR    | K04248 |
| ENSG00000138759 | 3.724485 | -2.294189 | 1 | 1 FRAS1    | -      |
| ENSG00000138964 | 3.724485 | -2.294189 | 1 | 1 PARVG    | K06275 |
| ENSG00000139219 | 3.724485 | -2.294189 | 1 | 1 COL2A1   | K19719 |
| ENSG00000139679 | 3.724485 | -2.294189 | 1 | 1 LPAR6    | -      |
| ENSG00000139874 | 3.724485 | -2.294189 | 1 | 1 SSTR1    | K04217 |
| ENSG00000140107 | 3.724485 | -2.294189 | 1 | 1 SLC25A47 | K15123 |
| ENSG00000140505 | 3.724485 | -2.294189 | 1 | 1 CYP1A2   | K07409 |
| ENSG00000140557 | 3.724485 | -2.294189 | 1 | 1 ST8SIA2  | K06612 |
| ENSG00000141086 | 3.724485 | -2.294189 | 1 | 1 CTRL     | K09632 |
| ENSG00000141497 | 3.724485 | -2.294189 | 1 | 1 ZMYND15  | -      |
| ENSG00000142224 | 3.724485 | -2.294189 | 1 | 1 IL19     | K05444 |
| ENSG00000142609 | 3.724485 | -2.294189 | 1 | 1 C1orf222 | -      |
| ENSG00000142615 | 3.724485 | -2.294189 | 1 | 1 CELA2A   | K01346 |
| ENSG00000143452 | 3.724485 | -2.294189 | 1 | 1 HORMAD1  | -      |
| ENSG00000143631 | 3.724485 | -2.294189 | 1 | 1 FLG      | K10384 |

|                 |          |           |   |             |        |
|-----------------|----------|-----------|---|-------------|--------|
| ENSG00000143839 | 3.724485 | -2.294189 | 1 | 1 REN       | K01380 |
| ENSG00000144035 | 3.724485 | -2.294189 | 1 | 1 NAT8      | -      |
| ENSG00000144366 | 3.724485 | -2.294189 | 1 | 1 GULP1     | -      |
| ENSG00000144837 | 3.724485 | -2.294189 | 1 | 1 PLA1A     | K13618 |
| ENSG00000145284 | 3.724485 | -2.294189 | 1 | 1 SCD5      | K00507 |
| ENSG00000146411 | 3.724485 | -2.294189 | 1 | 1 SLC2A12   | K08149 |
| ENSG00000147099 | 3.724485 | -2.294189 | 1 | 1 HDAC8     | K11405 |
| ENSG00000147145 | 3.724485 | -2.294189 | 1 | 1 LPAR4     | -      |
| ENSG00000147202 | 3.724485 | -2.294189 | 1 | 1 DIAPH2    | K05741 |
| ENSG00000147234 | 3.724485 | -2.294189 | 1 | 1 FRMPD3    | -      |
| ENSG00000149488 | 3.724485 | -2.294189 | 1 | 1 TMC2      | K12581 |
| ENSG00000149575 | 3.724485 | -2.294189 | 1 | 1 SCN2B     | K04846 |
| ENSG00000150471 | 3.724485 | -2.294189 | 1 | 1 LPHN3     | K04594 |
| ENSG00000150510 | 3.724485 | -2.294189 | 1 | 1 FAM124A   | -      |
| ENSG00000150551 | 3.724485 | -2.294189 | 1 | 1 LYPD1     | -      |
| ENSG00000150783 | 3.724485 | -2.294189 | 1 | 1 TEX12     | K19537 |
| ENSG00000151360 | 3.724485 | -2.294189 | 1 | 1 ALLC      | K01477 |
| ENSG00000151468 | 3.724485 | -2.294189 | 1 | 1 CCDC3     | -      |
| ENSG00000151575 | 3.724485 | -2.294189 | 1 | 1 TEX9      | -      |
| ENSG00000152086 | 3.724485 | -2.294189 | 1 | 1 TUBA3E    | K07374 |
| ENSG00000152154 | 3.724485 | -2.294189 | 1 | 1 TMEM178A  | -      |
| ENSG00000152229 | 3.724485 | -2.294189 | 1 | 1 PSTPIP2   | K17985 |
| ENSG00000152430 | 3.724485 | -2.294189 | 1 | 1 BOLL      | K17985 |
| ENSG00000152760 | 3.724485 | -2.294189 | 1 | 1 TCTEX1D1  | -      |
| ENSG00000152932 | 3.724485 | -2.294189 | 1 | 1 RAB3C     | K07883 |
| ENSG00000152977 | 3.724485 | -2.294189 | 1 | 1 ZIC1      | -      |
| ENSG00000153086 | 3.724485 | -2.294189 | 1 | 1 ACMSD     | K03392 |
| ENSG00000153446 | 3.724485 | -2.294189 | 1 | 1 C16orf89  | K12022 |
| ENSG00000153495 | 3.724485 | -2.294189 | 1 | 1 TEX29     | -      |
| ENSG00000154133 | 3.724485 | -2.294189 | 1 | 1 ROBO4     | K06784 |
| ENSG00000154342 | 3.724485 | -2.294189 | 1 | 1 WNT3A     | K00312 |
| ENSG00000155980 | 3.724485 | -2.294189 | 1 | 1 KIF5A     | K10396 |
| ENSG00000156574 | 3.724485 | -2.294189 | 1 | 1 NODAL     | K04666 |
| ENSG00000156575 | 3.724485 | -2.294189 | 1 | 1 PRG3      | -      |
| ENSG00000156920 | 3.724485 | -2.294189 | 1 | 1 GPR112    | K08455 |
| ENSG00000157680 | 3.724485 | -2.294189 | 1 | 1 DGKI      | K00901 |
| ENSG00000158445 | 3.724485 | -2.294189 | 1 | 1 KCNB1     | K04885 |
| ENSG00000158714 | 3.724485 | -2.294189 | 1 | 1 SLAMF8    | K16853 |
| ENSG00000159708 | 3.724485 | -2.294189 | 1 | 1 LRRC36    | K16594 |
| ENSG00000160321 | 3.724485 | -2.294189 | 1 | 1 ZNF208    | K09228 |
| ENSG00000160801 | 3.724485 | -2.294189 | 1 | 1 PTH1R     | K04585 |
| ENSG00000160868 | 3.724485 | -2.294189 | 1 | 1 CYP3A4    | K17689 |
| ENSG00000162753 | 3.724485 | -2.294189 | 1 | 1 SLC9C2    | K14726 |
| ENSG00000162771 | 3.724485 | -2.294189 | 1 | 1 FAM71A    | -      |
| ENSG00000162873 | 3.724485 | -2.294189 | 1 | 1 KLHDC8A   | -      |
| ENSG00000163154 | 3.724485 | -2.294189 | 1 | 1 TNFAIP8L2 | -      |
| ENSG00000163297 | 3.724485 | -2.294189 | 1 | 1 ANTXR2    | -      |
| ENSG00000163497 | 3.724485 | -2.294189 | 1 | 1 FEV       | K09437 |
| ENSG00000163618 | 3.724485 | -2.294189 | 1 | 1 CADPS     | -      |
| ENSG00000163632 | 3.724485 | -2.294189 | 1 | 1 C3orf49   | K12581 |
| ENSG00000163817 | 3.724485 | -2.294189 | 1 | 1 SLC6A20   | K05048 |
| ENSG00000164007 | 3.724485 | -2.294189 | 1 | 1 CLDN19    | K06087 |
| ENSG00000164303 | 3.724485 | -2.294189 | 1 | 1 ENPP6     | K08743 |
| ENSG00000164458 | 3.724485 | -2.294189 | 1 | 1 T         | K10172 |
| ENSG00000164841 | 3.724485 | -2.294189 | 1 | 1 TMEM74    | -      |
| ENSG00000164946 | 3.724485 | -2.294189 | 1 | 1 FREM1     | -      |
| ENSG00000165457 | 3.724485 | -2.294189 | 1 | 1 FOLR2     | K13649 |
| ENSG00000165917 | 3.724485 | -2.294189 | 1 | 1 RAPSN     | -      |

|                 |          |           |   |                 |        |
|-----------------|----------|-----------|---|-----------------|--------|
| ENSG00000166856 | 3.724485 | -2.294189 | 1 | 1 GPR182        | K04242 |
| ENSG00000167104 | 3.724485 | -2.294189 | 1 | 1 BPIFB6        | -      |
| ENSG00000167165 | 3.724485 | -2.294189 | 1 | 1 UGT1A6        | K09509 |
| ENSG00000167183 | 3.724485 | -2.294189 | 1 | 1 PRR15L        | -      |
| ENSG00000167414 | 3.724485 | -2.294189 | 1 | 1 GNG8          | K04544 |
| ENSG00000167619 | 3.724485 | -2.294189 | 1 | 1 TMEM145       | K17985 |
| ENSG00000167754 | 3.724485 | -2.294189 | 1 | 1 KLK5          | K09617 |
| ENSG00000167941 | 3.724485 | -2.294189 | 1 | 1 SOST          | K16834 |
| ENSG00000168032 | 3.724485 | -2.294189 | 1 | 1 ENTPD3        | K01510 |
| ENSG00000168148 | 3.724485 | -2.294189 | 1 | 1 HIST3H3       | K11253 |
| ENSG00000168269 | 3.724485 | -2.294189 | 1 | 1 FOXI1         | K09401 |
| ENSG00000168386 | 3.724485 | -2.294189 | 1 | 1 FILIP1L       | -      |
| ENSG00000168754 | 3.724485 | -2.294189 | 1 | 1 FAM178B       | -      |
| ENSG00000168878 | 3.724485 | -2.294189 | 1 | 1 SFTPB         | K12581 |
| ENSG00000168913 | 3.724485 | -2.294189 | 1 | 1 ENHO          | -      |
| ENSG00000169989 | 3.724485 | -2.294189 | 1 | 1 TIGD4         | -      |
| ENSG00000170044 | 3.724485 | -2.294189 | 1 | 1 ZPLD1         | -      |
| ENSG00000170289 | 3.724485 | -2.294189 | 1 | 1 CNGB3         | K04953 |
| ENSG00000170290 | 3.724485 | -2.294189 | 1 | 1 SLN           | -      |
| ENSG00000170498 | 3.724485 | -2.294189 | 1 | 1 KISS1         | -      |
| ENSG00000170627 | 3.724485 | -2.294189 | 1 | 1 GTSF1         | -      |
| ENSG00000170629 | 3.724485 | -2.294189 | 1 | 1 DPY19L2P2     | K09131 |
| ENSG00000170962 | 3.724485 | -2.294189 | 1 | 1 PDGFD         | K05450 |
| ENSG00000171051 | 3.724485 | -2.294189 | 1 | 1 FPR1          | K04172 |
| ENSG00000171502 | 3.724485 | -2.294189 | 1 | 1 COL24A1       | K06236 |
| ENSG00000171533 | 3.724485 | -2.294189 | 1 | 1 MAP6          | K10432 |
| ENSG00000171855 | 3.724485 | -2.294189 | 1 | 1 IFNB1         | K05415 |
| ENSG00000171873 | 3.724485 | -2.294189 | 1 | 1 ADRA1D        | K04137 |
| ENSG00000172058 | 3.724485 | -2.294189 | 1 | 1 SERF1A        | K12022 |
| ENSG00000172349 | 3.724485 | -2.294189 | 1 | 1 IL16          | -      |
| ENSG00000172367 | 3.724485 | -2.294189 | 1 | 1 PDZD3         | -      |
| ENSG00000172403 | 3.724485 | -2.294189 | 1 | 1 SYNPO2        | -      |
| ENSG00000172955 | 3.724485 | -2.294189 | 1 | 1 ADH6          | K13952 |
| ENSG00000173124 | 3.724485 | -2.294189 | 1 | 1 C10orf129     | K01896 |
| ENSG00000173673 | 3.724485 | -2.294189 | 1 | 1 HES3          | K09088 |
| ENSG00000174111 | 3.724485 | -2.294189 | 1 | 1 SOCS7         | K04699 |
| ENSG00000174358 | 3.724485 | -2.294189 | 1 | 1 SLC6A19       | K05334 |
| ENSG00000174448 | 3.724485 | -2.294189 | 1 | 1 STARD6        | -      |
| ENSG00000174562 | 3.724485 | -2.294189 | 1 | 1 KLK15         | K09623 |
| ENSG00000174576 | 3.724485 | -2.294189 | 1 | 1 NPAS4         | -      |
| ENSG00000175206 | 3.724485 | -2.294189 | 1 | 1 NPPA          | K12334 |
| ENSG00000175538 | 3.724485 | -2.294189 | 1 | 1 KCNE3         | K04897 |
| ENSG00000175773 | 3.724485 | -2.294189 | 1 | 1 RP11-121M22.1 | -      |
| ENSG00000175806 | 3.724485 | -2.294189 | 1 | 1 MSRA          | K07304 |
| ENSG00000176244 | 3.724485 | -2.294189 | 1 | 1 ACBD7         | K12581 |
| ENSG00000176601 | 3.724485 | -2.294189 | 1 | 1 MAP3K19       | K17533 |
| ENSG00000176774 | 3.724485 | -2.294189 | 1 | 1 MAGEB18       | -      |
| ENSG00000176945 | 3.724485 | -2.294189 | 1 | 1 MUC20         | K17985 |
| ENSG00000177197 | 3.724485 | -2.294189 | 1 | 1 PCNPP5        | -      |
| ENSG00000177202 | 3.724485 | -2.294189 | 1 | 1 SPACA4        | -      |
| ENSG00000177238 | 3.724485 | -2.294189 | 1 | 1 TRIM72        | K12036 |
| ENSG00000177432 | 3.724485 | -2.294189 | 1 | 1 NAP1L5        | K11283 |
| ENSG00000177464 | 3.724485 | -2.294189 | 1 | 1 GPR4          | -      |
| ENSG00000177669 | 3.724485 | -2.294189 | 1 | 1 MBOAT4        | -      |
| ENSG00000177990 | 3.724485 | -2.294189 | 1 | 1 DPY19L2       | -      |
| ENSG00000178162 | 3.724485 | -2.294189 | 1 | 1 FAR2P2        | -      |
| ENSG00000178723 | 3.724485 | -2.294189 | 1 | 1 GLULP4        | K01915 |
| ENSG00000178772 | 3.724485 | -2.294189 | 1 | 1 CPN2          | K13023 |

|                 |          |           |   |                 |        |
|-----------------|----------|-----------|---|-----------------|--------|
| ENSG00000178860 | 3.724485 | -2.294189 | 1 | 1 MSC           | K09072 |
| ENSG00000178882 | 3.724485 | -2.294189 | 1 | 1 FAM101A       | -      |
| ENSG00000178896 | 3.724485 | -2.294189 | 1 | 1 EXOSC4        | K11600 |
| ENSG00000178972 | 3.724485 | -2.294189 | 1 | 1 AC097658.1    | K17985 |
| ENSG00000179381 | 3.724485 | -2.294189 | 1 | 1 OR4K11P       | K04257 |
| ENSG00000179452 | 3.724485 | -2.294189 | 1 | 1 RP11-380B22.1 | -      |
| ENSG00000180279 | 3.724485 | -2.294189 | 1 | 1 CTD-2568A17.5 | -      |
| ENSG00000180999 | 3.724485 | -2.294189 | 1 | 1 C1orf105      | -      |
| ENSG00000181097 | 3.724485 | -2.294189 | 1 | 1 RP11-429J17.2 | -      |
| ENSG00000181260 | 3.724485 | -2.294189 | 1 | 1 MTHFD2P7      | K13403 |
| ENSG00000181355 | 3.724485 | -2.294189 | 1 | 1 OFCC1         | -      |
| ENSG00000181541 | 3.724485 | -2.294189 | 1 | 1 MAB21L2       | -      |
| ENSG00000181908 | 3.724485 | -2.294189 | 1 | 1 AP003774.4    | K10408 |
| ENSG00000182040 | 3.724485 | -2.294189 | 1 | 1 USH1G         | -      |
| ENSG00000182230 | 3.724485 | -2.294189 | 1 | 1 FAM153B       | -      |
| ENSG00000182333 | 3.724485 | -2.294189 | 1 | 1 LIPF          | K14452 |
| ENSG00000182625 | 3.724485 | -2.294189 | 1 | 1 RP11-123C21.1 | K04545 |
| ENSG00000183150 | 3.724485 | -2.294189 | 1 | 1 GPR19         | -      |
| ENSG00000183169 | 3.724485 | -2.294189 | 1 | 1 POM121L1P     | -      |
| ENSG00000183185 | 3.724485 | -2.294189 | 1 | 1 GABRR3        | K05190 |
| ENSG00000183379 | 3.724485 | -2.294189 | 1 | 1 SYNDIG1L      | -      |
| ENSG00000183813 | 3.724485 | -2.294189 | 1 | 1 CCR4          | K04179 |
| ENSG00000184033 | 3.724485 | -2.294189 | 1 | 1 CTAG1B        | -      |
| ENSG00000184224 | 3.724485 | -2.294189 | 1 | 1 C11orf72      | -      |
| ENSG00000184347 | 3.724485 | -2.294189 | 1 | 1 SLIT3         | K06850 |
| ENSG00000184486 | 3.724485 | -2.294189 | 1 | 1 POU3F2        | K09365 |
| ENSG00000184490 | 3.724485 | -2.294189 | 1 | 1 AP000351.9    | K00799 |
| ENSG00000184635 | 3.724485 | -2.294189 | 1 | 1 ZNF93         | K09228 |
| ENSG00000185775 | 3.724485 | -2.294189 | 1 | 1 SPATA31A6     | -      |
| ENSG00000186150 | 3.724485 | -2.294189 | 1 | 1 UBL4B         | -      |
| ENSG00000186160 | 3.724485 | -2.294189 | 1 | 1 CYP4Z1        | K07429 |
| ENSG00000186166 | 3.724485 | -2.294189 | 1 | 1 CCDC84        | -      |
| ENSG00000186197 | 3.724485 | -2.294189 | 1 | 1 EDARADD       | -      |
| ENSG00000186198 | 3.724485 | -2.294189 | 1 | 1 SLC51B        | K14361 |
| ENSG00000186790 | 3.724485 | -2.294189 | 1 | 1 FOXE3         | K09398 |
| ENSG00000186919 | 3.724485 | -2.294189 | 1 | 1 ZACN          | K16888 |
| ENSG00000186976 | 3.724485 | -2.294189 | 1 | 1 EFCAB6        | -      |
| ENSG00000186977 | 3.724485 | -2.294189 | 1 | 1 KRTAP19-5     | -      |
| ENSG00000187122 | 3.724485 | -2.294189 | 1 | 1 SLIT1         | -      |
| ENSG00000187416 | 3.724485 | -2.294189 | 1 | 1 LHFPL3        | -      |
| ENSG00000187456 | 3.724485 | -2.294189 | 1 | 1 RDM1          | K10874 |
| ENSG00000187479 | 3.724485 | -2.294189 | 1 | 1 C11orf96      | -      |
| ENSG00000187486 | 3.724485 | -2.294189 | 1 | 1 KCNJ11        | K05004 |
| ENSG00000187513 | 3.724485 | -2.294189 | 1 | 1 GJA4          | K07613 |
| ENSG00000187601 | 3.724485 | -2.294189 | 1 | 1 MAGEH1        | -      |
| ENSG00000187791 | 3.724485 | -2.294189 | 1 | 1 FAM205CP      | -      |
| ENSG00000187867 | 3.724485 | -2.294189 | 1 | 1 PALM3         | -      |
| ENSG00000188257 | 3.724485 | -2.294189 | 1 | 1 PLA2G2A       | K01047 |
| ENSG00000188770 | 3.724485 | -2.294189 | 1 | 1 OPTC          | K08128 |
| ENSG00000189001 | 3.724485 | -2.294189 | 1 | 1 SBSN          | -      |
| ENSG00000189099 | 3.724485 | -2.294189 | 1 | 1 PRSS48        | -      |
| ENSG00000189275 | 3.724485 | -2.294189 | 1 | 1 AL450307.1    | -      |
| ENSG00000196361 | 3.724485 | -2.294189 | 1 | 1 ELAVL3        | K13208 |
| ENSG00000196689 | 3.724485 | -2.294189 | 1 | 1 TRPV1         | K05222 |
| ENSG00000196704 | 3.724485 | -2.294189 | 1 | 1 AMZ2          | K06974 |
| ENSG00000196814 | 3.724485 | -2.294189 | 1 | 1 MVB12B        | K12186 |
| ENSG00000196927 | 3.724485 | -2.294189 | 1 | 1 AC009093.1    | K12581 |
| ENSG00000196960 | 3.724485 | -2.294189 | 1 | 1 RP11-192P3.5  | -      |

|                 |          |           |   |                |        |
|-----------------|----------|-----------|---|----------------|--------|
| ENSG00000197284 | 3.724485 | -2.294189 | 1 | 1 RP11-589F5.3 | -      |
| ENSG00000197360 | 3.724485 | -2.294189 | 1 | 1 ZNF98        | K09228 |
| ENSG00000197416 | 3.724485 | -2.294189 | 1 | 1 FABP12       | -      |
| ENSG00000197632 | 3.724485 | -2.294189 | 1 | 1 SERPINB2     | K13963 |
| ENSG00000197815 | 3.724485 | -2.294189 | 1 | 1 AC122129.1   | K17985 |
| ENSG00000197888 | 3.724485 | -2.294189 | 1 | 1 UGT2B17      | K00699 |
| ENSG00000198211 | 3.724485 | -2.294189 | 1 | 1 TUBB3        | K07375 |
| ENSG00000198221 | 3.724485 | -2.294189 | 1 | 1 MLLT4-AS1    | -      |
| ENSG00000198331 | 3.724485 | -2.294189 | 1 | 1 HYLS1        | K16472 |
| ENSG00000198384 | 3.724485 | -2.294189 | 1 | 1 TPTE2P3      | K18079 |
| ENSG00000198471 | 3.724485 | -2.294189 | 1 | 1 RTP2         | -      |
| ENSG00000198523 | 3.724485 | -2.294189 | 1 | 1 PLN          | K05852 |
| ENSG00000198547 | 3.724485 | -2.294189 | 1 | 1 C20orf203    | -      |
| ENSG00000198574 | 3.724485 | -2.294189 | 1 | 1 SH2D1B       | K07989 |
| ENSG00000198632 | 3.724485 | -2.294189 | 1 | 1 AC004878.3   | K10858 |
| ENSG00000198739 | 3.724485 | -2.294189 | 1 | 1 LRRTM3       | -      |
| ENSG00000198758 | 3.724485 | -2.294189 | 1 | 1 EPS8L3       | K17277 |
| ENSG00000198822 | 3.724485 | -2.294189 | 1 | 1 GRM3         | K04605 |
| ENSG00000198870 | 3.724485 | -2.294189 | 1 | 1 C9orf96      | K17546 |
| ENSG00000199047 | 3.724485 | -2.294189 | 1 | 1 MIR378A      | -      |
| ENSG00000199082 | 3.724485 | -2.294189 | 1 | 1 MIR342       | -      |
| ENSG00000199132 | 3.724485 | -2.294189 | 1 | 1 MIR450A1     | -      |
| ENSG00000199545 | 3.724485 | -2.294189 | 1 | 1 RNA5SP195    | -      |
| ENSG00000199875 | 3.724485 | -2.294189 | 1 | 1 Y_RNA        | -      |
| ENSG00000200033 | 3.724485 | -2.294189 | 1 | 1 RNU6-403P    | -      |
| ENSG00000200115 | 3.724485 | -2.294189 | 1 | 1 RNA5SP440    | -      |
| ENSG00000200142 | 3.724485 | -2.294189 | 1 | 1 Y_RNA        | -      |
| ENSG00000200181 | 3.724485 | -2.294189 | 1 | 1 SNORD85      | -      |
| ENSG00000200294 | 3.724485 | -2.294189 | 1 | 1 SNORA36      | -      |
| ENSG00000200301 | 3.724485 | -2.294189 | 1 | 1 RNA5SP483    | -      |
| ENSG00000200397 | 3.724485 | -2.294189 | 1 | 1 Y_RNA        | -      |
| ENSG00000200403 | 3.724485 | -2.294189 | 1 | 1 RNU6-1099P   | -      |
| ENSG00000200437 | 3.724485 | -2.294189 | 1 | 1 RNU6-799P    | -      |
| ENSG00000200652 | 3.724485 | -2.294189 | 1 | 1 SNORA25      | -      |
| ENSG00000200788 | 3.724485 | -2.294189 | 1 | 1 Y_RNA        | -      |
| ENSG00000200834 | 3.724485 | -2.294189 | 1 | 1 Y_RNA        | -      |
| ENSG00000200842 | 3.724485 | -2.294189 | 1 | 1 Y_RNA        | -      |
| ENSG00000200997 | 3.724485 | -2.294189 | 1 | 1 RNU1-85P     | -      |
| ENSG00000201071 | 3.724485 | -2.294189 | 1 | 1 Y_RNA        | -      |
| ENSG00000201076 | 3.724485 | -2.294189 | 1 | 1 RNU4-51P     | -      |
| ENSG00000201185 | 3.724485 | -2.294189 | 1 | 1 RNA5SP202    | -      |
| ENSG00000201441 | 3.724485 | -2.294189 | 1 | 1 RNU6-646P    | -      |
| ENSG00000201547 | 3.724485 | -2.294189 | 1 | 1 Y_RNA        | -      |
| ENSG00000201616 | 3.724485 | -2.294189 | 1 | 1 RNU1-91P     | -      |
| ENSG00000201619 | 3.724485 | -2.294189 | 1 | 1 SNORA67      | -      |
| ENSG00000201898 | 3.724485 | -2.294189 | 1 | 1 SNORA72      | -      |
| ENSG00000202107 | 3.724485 | -2.294189 | 1 | 1 SNORD103B    | -      |
| ENSG00000202119 | 3.724485 | -2.294189 | 1 | 1 RNU6-302P    | -      |
| ENSG00000202222 | 3.724485 | -2.294189 | 1 | 1 Y_RNA        | -      |
| ENSG00000202347 | 3.724485 | -2.294189 | 1 | 1 RNU1-16P     | -      |
| ENSG00000202472 | 3.724485 | -2.294189 | 1 | 1 RNA5SP248    | -      |
| ENSG00000202487 | 3.724485 | -2.294189 | 1 | 1 Y_RNA        | -      |
| ENSG00000202522 | 3.724485 | -2.294189 | 1 | 1 Y_RNA        | -      |
| ENSG00000202538 | 3.724485 | -2.294189 | 1 | 1 RNU4-2       | -      |
| ENSG00000203306 | 3.724485 | -2.294189 | 1 | 1 AP001007.1   | -      |
| ENSG00000203325 | 3.724485 | -2.294189 | 1 | 1 RP11-277A4.4 | -      |
| ENSG00000203441 | 3.724485 | -2.294189 | 1 | 1 LINC00449    | -      |
| ENSG00000203446 | 3.724485 | -2.294189 | 1 | 1 AC004988.1   | -      |

|                 |          |           |   |                |        |
|-----------------|----------|-----------|---|----------------|--------|
| ENSG00000203542 | 3.724485 | -2.294189 | 1 | 1 AL353671.1   | K02927 |
| ENSG00000203615 | 3.724485 | -2.294189 | 1 | 1 AC069200.1   | K09131 |
| ENSG00000203697 | 3.724485 | -2.294189 | 1 | 1 CAPN8        | K08577 |
| ENSG00000203849 | 3.724485 | -2.294189 | 1 | 1 RP11-417J8.6 | -      |
| ENSG00000203852 | 3.724485 | -2.294189 | 1 | 1 HIST2H3A     | K11253 |
| ENSG00000203863 | 3.724485 | -2.294189 | 1 | 1 AL079342.1   | K10408 |
| ENSG00000204113 | 3.724485 | -2.294189 | 1 | 1 BMP2KL       | K08854 |
| ENSG00000204150 | 3.724485 | -2.294189 | 1 | 1 CTGLF11P     | K12491 |
| ENSG00000204304 | 3.724485 | -2.294189 | 1 | 1 PBX2         | K15609 |
| ENSG00000204396 | 3.724485 | -2.294189 | 1 | 1 VWA7         | -      |
| ENSG00000204913 | 3.724485 | -2.294189 | 1 | 1 LRRC3C       | -      |
| ENSG00000205015 | 3.724485 | -2.294189 | 1 | 1 RP11-46C24.3 | -      |
| ENSG00000205108 | 3.724485 | -2.294189 | 1 | 1 FAM205A      | -      |
| ENSG00000205334 | 3.724485 | -2.294189 | 1 | 1 AC074091.13  | K12581 |
| ENSG00000205537 | 3.724485 | -2.294189 | 1 | 1 RP11-89H19.1 | -      |
| ENSG00000205832 | 3.724485 | -2.294189 | 1 | 1 C16orf96     | -      |
| ENSG00000205867 | 3.724485 | -2.294189 | 1 | 1 KRTAP5-2     | -      |
| ENSG00000206013 | 3.724485 | -2.294189 | 1 | 1 IFITM5       | K06566 |
| ENSG00000206028 | 3.724485 | -2.294189 | 1 | 1 CTA-373H7.7  | -      |
| ENSG00000206082 | 3.724485 | -2.294189 | 1 | 1 LINC01002    | -      |
| ENSG00000206090 | 3.724485 | -2.294189 | 1 | 1 AP000350.7   | K00799 |
| ENSG00000206549 | 3.724485 | -2.294189 | 1 | 1 PRSS50       | -      |
| ENSG00000206605 | 3.724485 | -2.294189 | 1 | 1 RNU6-946P    | -      |
| ENSG00000206646 | 3.724485 | -2.294189 | 1 | 1 Y_RNA        | -      |
| ENSG00000206712 | 3.724485 | -2.294189 | 1 | 1 RNU6-26P     | -      |
| ENSG00000206713 | 3.724485 | -2.294189 | 1 | 1 Y_RNA        | -      |
| ENSG00000206768 | 3.724485 | -2.294189 | 1 | 1 Y_RNA        | -      |
| ENSG00000206775 | 3.724485 | -2.294189 | 1 | 1 SNORD37      | -      |
| ENSG00000206786 | 3.724485 | -2.294189 | 1 | 1 RNU6-701P    | -      |
| ENSG00000206859 | 3.724485 | -2.294189 | 1 | 1 RNU6-767P    | -      |
| ENSG00000206887 | 3.724485 | -2.294189 | 1 | 1 RNU6-1008P   | -      |
| ENSG00000206989 | 3.724485 | -2.294189 | 1 | 1 SNORD63      | -      |
| ENSG00000207003 | 3.724485 | -2.294189 | 1 | 1 RNU6-611P    | -      |
| ENSG00000207008 | 3.724485 | -2.294189 | 1 | 1 SNORA54      | -      |
| ENSG00000207009 | 3.724485 | -2.294189 | 1 | 1 Y_RNA        | -      |
| ENSG00000207021 | 3.724485 | -2.294189 | 1 | 1 Y_RNA        | -      |
| ENSG00000207042 | 3.724485 | -2.294189 | 1 | 1 RNU6-196P    | -      |
| ENSG00000207175 | 3.724485 | -2.294189 | 1 | 1 RNU1-67P     | -      |
| ENSG00000207186 | 3.724485 | -2.294189 | 1 | 1 RNA5SP122    | -      |
| ENSG00000207281 | 3.724485 | -2.294189 | 1 | 1 Y_RNA        | -      |
| ENSG00000207370 | 3.724485 | -2.294189 | 1 | 1 Y_RNA        | -      |
| ENSG00000207467 | 3.724485 | -2.294189 | 1 | 1 Y_RNA        | -      |
| ENSG00000207631 | 3.724485 | -2.294189 | 1 | 1 MIR641       | -      |
| ENSG00000207696 | 3.724485 | -2.294189 | 1 | 1 MIR659       | -      |
| ENSG00000207924 | 3.724485 | -2.294189 | 1 | 1 MIR196A2     | -      |
| ENSG00000207988 | 3.724485 | -2.294189 | 1 | 1 MIR576       | -      |
| ENSG00000207997 | 3.724485 | -2.294189 | 1 | 1 MIR644A      | -      |
| ENSG00000211581 | 3.724485 | -2.294189 | 1 | 1 MIR765       | -      |
| ENSG00000211644 | 3.724485 | -2.294189 | 1 | 1 IGLV1-51     | -      |
| ENSG00000211959 | 3.724485 | -2.294189 | 1 | 1 IGHV4-39     | K06856 |
| ENSG00000212242 | 3.724485 | -2.294189 | 1 | 1 RNA5SP219    | -      |
| ENSG00000212342 | 3.724485 | -2.294189 | 1 | 1 SNORA12      | -      |
| ENSG00000212378 | 3.724485 | -2.294189 | 1 | 1 SNORD78      | -      |
| ENSG00000212440 | 3.724485 | -2.294189 | 1 | 1 SNORA75      | -      |
| ENSG00000212466 | 3.724485 | -2.294189 | 1 | 1 RNU6-952P    | -      |
| ENSG00000212526 | 3.724485 | -2.294189 | 1 | 1 RNU6-466P    | -      |
| ENSG00000212533 | 3.724485 | -2.294189 | 1 | 1 SNORA75      | -      |
| ENSG00000212536 | 3.724485 | -2.294189 | 1 | 1 RNA5SP474    | -      |

|                 |          |           |   |                 |        |
|-----------------|----------|-----------|---|-----------------|--------|
| ENSG00000212542 | 3.724485 | -2.294189 | 1 | 1 RNA5SP496     | -      |
| ENSG00000212939 | 3.724485 | -2.294189 | 1 | 1 RP1-29C18.10  | -      |
| ENSG00000213058 | 3.724485 | -2.294189 | 1 | 1 RP4-765C7.2   | K02955 |
| ENSG00000213131 | 3.724485 | -2.294189 | 1 | 1 YWHAZP4       | K16197 |
| ENSG00000213212 | 3.724485 | -2.294189 | 1 | 1 NCLP1         | K11294 |
| ENSG00000213216 | 3.724485 | -2.294189 | 1 | 1 RP11-355O1.7  | K02975 |
| ENSG00000213315 | 3.724485 | -2.294189 | 1 | 1 CTD-3035D6.1  | K02964 |
| ENSG00000213559 | 3.724485 | -2.294189 | 1 | 1 HNRNPA1P64    | K12741 |
| ENSG00000213598 | 3.724485 | -2.294189 | 1 | 1 RP11-112J1.1  | K02910 |
| ENSG00000213673 | 3.724485 | -2.294189 | 1 | 1 SLC25A5P3     | K05863 |
| ENSG00000213703 | 3.724485 | -2.294189 | 1 | 1 RP5-849H19.2  | K02872 |
| ENSG00000213731 | 3.724485 | -2.294189 | 1 | 1 RAB5CP1       | K07889 |
| ENSG00000213757 | 3.724485 | -2.294189 | 1 | 1 CTC-451P13.1  | K02984 |
| ENSG00000213857 | 3.724485 | -2.294189 | 1 | 1 RP11-12M9.4   | K05692 |
| ENSG00000213863 | 3.724485 | -2.294189 | 1 | 1 XX-C2158C12.2 | -      |
| ENSG00000213871 | 3.724485 | -2.294189 | 1 | 1 TAF9BP1       | K03133 |
| ENSG00000213872 | 3.724485 | -2.294189 | 1 | 1 AC092798.2    | K02912 |
| ENSG00000213985 | 3.724485 | -2.294189 | 1 | 1 AC078899.1    | K17260 |
| ENSG00000214018 | 3.724485 | -2.294189 | 1 | 1 RRM2P3        | K10808 |
| ENSG00000214027 | 3.724485 | -2.294189 | 1 | 1 ARPC3P5       | K05756 |
| ENSG00000214124 | 3.724485 | -2.294189 | 1 | 1 SNRPEP9       | K11097 |
| ENSG00000214264 | 3.724485 | -2.294189 | 1 | 1 RP11-356J5.5  | -      |
| ENSG00000214289 | 3.724485 | -2.294189 | 1 | 1 RPL39P5       | K02924 |
| ENSG00000214435 | 3.724485 | -2.294189 | 1 | 1 AS3MT         | K07755 |
| ENSG00000214456 | 3.724485 | -2.294189 | 1 | 1 PLIN5         | K17985 |
| ENSG00000214544 | 3.724485 | -2.294189 | 1 | 1 GTF2IRD2P1    | K03121 |
| ENSG00000214688 | 3.724485 | -2.294189 | 1 | 1 C10orf105     | K06813 |
| ENSG00000214886 | 3.724485 | -2.294189 | 1 | 1 FAM177A1P1    | -      |
| ENSG00000214946 | 3.724485 | -2.294189 | 1 | 1 TBC1D26       | -      |
| ENSG00000214998 | 3.724485 | -2.294189 | 1 | 1 AC006465.4    | K05868 |
| ENSG00000215065 | 3.724485 | -2.294189 | 1 | 1 DUSP8P4       | K04459 |
| ENSG00000215347 | 3.724485 | -2.294189 | 1 | 1 SLC25A5P1     | K05863 |
| ENSG00000215483 | 3.724485 | -2.294189 | 1 | 1 LINC00598     | -      |
| ENSG00000215529 | 3.724485 | -2.294189 | 1 | 1 EFCAB8        | -      |
| ENSG00000215845 | 3.724485 | -2.294189 | 1 | 1 TSTD1         | -      |
| ENSG00000215910 | 3.724485 | -2.294189 | 1 | 1 C1orf167      | K12831 |
| ENSG00000215973 | 3.724485 | -2.294189 | 1 | 1 MIR933        | -      |
| ENSG00000216193 | 3.724485 | -2.294189 | 1 | 1 AC009336.1    | -      |
| ENSG00000217372 | 3.724485 | -2.294189 | 1 | 1 TUBB4BP7      | K07375 |
| ENSG00000217648 | 3.724485 | -2.294189 | 1 | 1 RP1-95L4.4    | K09650 |
| ENSG00000217746 | 3.724485 | -2.294189 | 1 | 1 RP1-303A1.1   | -      |
| ENSG00000217950 | 3.724485 | -2.294189 | 1 | 1 AC073869.20   | K14833 |
| ENSG00000218018 | 3.724485 | -2.294189 | 1 | 1 RP4-800J21.3  | -      |
| ENSG00000218069 | 3.724485 | -2.294189 | 1 | 1 RSL24D1P1     | K02896 |
| ENSG00000218793 | 3.724485 | -2.294189 | 1 | 1 RP3-382I10.3  | K01611 |
| ENSG00000219085 | 3.724485 | -2.294189 | 1 | 1 NPM1P37       | K11276 |
| ENSG00000219163 | 3.724485 | -2.294189 | 1 | 1 HMGB1P20      | K10802 |
| ENSG00000219355 | 3.724485 | -2.294189 | 1 | 1 RPL31P52      | K02910 |
| ENSG00000219435 | 3.724485 | -2.294189 | 1 | 1 TEX40         | -      |
| ENSG00000219712 | 3.724485 | -2.294189 | 1 | 1 RP11-532F6.2  | -      |
| ENSG00000219736 | 3.724485 | -2.294189 | 1 | 1 RP11-560O20.1 | K14295 |
| ENSG00000219932 | 3.724485 | -2.294189 | 1 | 1 RPL12P8       | K02870 |
| ENSG00000220583 | 3.724485 | -2.294189 | 1 | 1 RPL35P2       | K02918 |
| ENSG00000220660 | 3.724485 | -2.294189 | 1 | 1 RP3-406A7.3   | -      |
| ENSG00000220693 | 3.724485 | -2.294189 | 1 | 1 AC011498.1    | K17985 |
| ENSG00000220695 | 3.724485 | -2.294189 | 1 | 1 RP1-121G13.3  | K17822 |
| ENSG00000221169 | 3.724485 | -2.294189 | 1 | 1 AC013444.2    | -      |
| ENSG00000221203 | 3.724485 | -2.294189 | 1 | 1 MIR1262       | -      |

|                 |          |           |   |                 |        |
|-----------------|----------|-----------|---|-----------------|--------|
| ENSG00000221204 | 3.724485 | -2.294189 | 1 | 1 AC106795.1    | --     |
| ENSG00000221230 | 3.724485 | -2.294189 | 1 | 1 MIR548L       | --     |
| ENSG00000221272 | 3.724485 | -2.294189 | 1 | 1 AC067742.1    | --     |
| ENSG00000221429 | 3.724485 | -2.294189 | 1 | 1 AC018635.1    | --     |
| ENSG00000221878 | 3.724485 | -2.294189 | 1 | 1 PSG7          | K06500 |
| ENSG00000222005 | 3.724485 | -2.294189 | 1 | 1 LINC01118     | --     |
| ENSG00000222035 | 3.724485 | -2.294189 | 1 | 1 AC079354.3    | --     |
| ENSG00000222044 | 3.724485 | -2.294189 | 1 | 1 RP5-1039K5.16 | --     |
| ENSG00000222069 | 3.724485 | -2.294189 | 1 | 1 RN7SKP285     | --     |
| ENSG00000222100 | 3.724485 | -2.294189 | 1 | 1 RNA5SP316     | --     |
| ENSG00000222121 | 3.724485 | -2.294189 | 1 | 1 AL512290.1    | --     |
| ENSG00000222190 | 3.724485 | -2.294189 | 1 | 1 MIR1910       | --     |
| ENSG00000222282 | 3.724485 | -2.294189 | 1 | 1 RNU6-584P     | --     |
| ENSG00000222370 | 3.724485 | -2.294189 | 1 | 1 SNORA36B      | --     |
| ENSG00000222371 | 3.724485 | -2.294189 | 1 | 1 RN7SKP202     | --     |
| ENSG00000222610 | 3.724485 | -2.294189 | 1 | 1 RNU6-402P     | --     |
| ENSG00000222808 | 3.724485 | -2.294189 | 1 | 1 RNU4-47P      | --     |
| ENSG00000223187 | 3.724485 | -2.294189 | 1 | 1 Y_RNA         | --     |
| ENSG00000223188 | 3.724485 | -2.294189 | 1 | 1 Y_RNA         | --     |
| ENSG00000223300 | 3.724485 | -2.294189 | 1 | 1 Y_RNA         | --     |
| ENSG00000223432 | 3.724485 | -2.294189 | 1 | 1 RP11-62L18.3  | --     |
| ENSG00000223462 | 3.724485 | -2.294189 | 1 | 1 RP11-285G1.9  | --     |
| ENSG00000223511 | 3.724485 | -2.294189 | 1 | 1 RP13-297E16.4 | --     |
| ENSG00000223704 | 3.724485 | -2.294189 | 1 | 1 RP1-90L6.2    | --     |
| ENSG00000223787 | 3.724485 | -2.294189 | 1 | 1 RP4-593M8.1   | --     |
| ENSG00000223825 | 3.724485 | -2.294189 | 1 | 1 DAZAP2P1      | --     |
| ENSG00000223867 | 3.724485 | -2.294189 | 1 | 1 AC098592.7    | --     |
| ENSG00000223878 | 3.724485 | -2.294189 | 1 | 1 AC005517.3    | K03767 |
| ENSG00000223979 | 3.724485 | -2.294189 | 1 | 1 SMCR2         | --     |
| ENSG00000223984 | 3.724485 | -2.294189 | 1 | 1 HNRNPRP1      | K13161 |
| ENSG00000224077 | 3.724485 | -2.294189 | 1 | 1 AP000936.4    | --     |
| ENSG00000224078 | 3.724485 | -2.294189 | 1 | 1 SNHG14        | --     |
| ENSG00000224081 | 3.724485 | -2.294189 | 1 | 1 LINC01057     | --     |
| ENSG00000224100 | 3.724485 | -2.294189 | 1 | 1 AP001630.5    | --     |
| ENSG00000224155 | 3.724485 | -2.294189 | 1 | 1 RP11-700P18.2 | K11584 |
| ENSG00000224232 | 3.724485 | -2.294189 | 1 | 1 AC110299.5    | --     |
| ENSG00000224238 | 3.724485 | -2.294189 | 1 | 1 WARS2-IT1     | --     |
| ENSG00000224276 | 3.724485 | -2.294189 | 1 | 1 RP11-336K24.5 | --     |
| ENSG00000224324 | 3.724485 | -2.294189 | 1 | 1 THAP5P1       | --     |
| ENSG00000224349 | 3.724485 | -2.294189 | 1 | 1 RP11-462G2.2  | --     |
| ENSG00000224460 | 3.724485 | -2.294189 | 1 | 1 RP11-439L18.2 | --     |
| ENSG00000224533 | 3.724485 | -2.294189 | 1 | 1 TMLHE-AS1     | --     |
| ENSG00000224563 | 3.724485 | -2.294189 | 1 | 1 LPP-AS1       | --     |
| ENSG00000224629 | 3.724485 | -2.294189 | 1 | 1 RP5-1142J19.2 | K02929 |
| ENSG00000224682 | 3.724485 | -2.294189 | 1 | 1 SOCS5P2       | K04698 |
| ENSG00000224707 | 3.724485 | -2.294189 | 1 | 1 E2F3-IT1      | --     |
| ENSG00000224794 | 3.724485 | -2.294189 | 1 | 1 RP3-333H23.8  | --     |
| ENSG00000224800 | 3.724485 | -2.294189 | 1 | 1 RP11-235D19.2 | K02977 |
| ENSG00000224839 | 3.724485 | -2.294189 | 1 | 1 AC093698.2    | K02870 |
| ENSG00000224899 | 3.724485 | -2.294189 | 1 | 1 RP11-3B12.5   | --     |
| ENSG00000224910 | 3.724485 | -2.294189 | 1 | 1 AC002115.5    | --     |
| ENSG00000224928 | 3.724485 | -2.294189 | 1 | 1 KRT8P30       | K07605 |
| ENSG00000225002 | 3.724485 | -2.294189 | 1 | 1 RP11-6F6.1    | --     |
| ENSG00000225030 | 3.724485 | -2.294189 | 1 | 1 RP4-784A16.3  | --     |
| ENSG00000225053 | 3.724485 | -2.294189 | 1 | 1 PRPF38AP1     | K12849 |
| ENSG00000225078 | 3.724485 | -2.294189 | 1 | 1 RP11-123N4.4  | --     |
| ENSG00000225092 | 3.724485 | -2.294189 | 1 | 1 RP11-405O10.2 | --     |
| ENSG00000225111 | 3.724485 | -2.294189 | 1 | 1 AC083900.1    | --     |



|                 |          |           |   |                    |        |
|-----------------|----------|-----------|---|--------------------|--------|
| ENSG00000225123 | 3.724485 | -2.294189 | 1 | 1 RP11-255A11.4    | -      |
| ENSG00000225146 | 3.724485 | -2.294189 | 1 | 1 AC073957.15      | -      |
| ENSG00000225169 | 3.724485 | -2.294189 | 1 | 1 BRI3P1           | K09699 |
| ENSG00000225263 | 3.724485 | -2.294189 | 1 | 1 PCDH9-AS3        | -      |
| ENSG00000225315 | 3.724485 | -2.294189 | 1 | 1 RP11-293P20.2    | -      |
| ENSG00000225331 | 3.724485 | -2.294189 | 1 | 1 AP001055.6       | -      |
| ENSG00000225442 | 3.724485 | -2.294189 | 1 | 1 MPRIP-AS1        | -      |
| ENSG00000225561 | 3.724485 | -2.294189 | 1 | 1 RP11-412H9.2     | -      |
| ENSG00000225632 | 3.724485 | -2.294189 | 1 | 1 RP5-997D24.3     | -      |
| ENSG00000225639 | 3.724485 | -2.294189 | 1 | 1 PGAM1P2          | K01834 |
| ENSG00000225715 | 3.724485 | -2.294189 | 1 | 1 RP11-325E14.5    | K02725 |
| ENSG00000225731 | 3.724485 | -2.294189 | 1 | 1 AP001627.1       | -      |
| ENSG00000225756 | 3.724485 | -2.294189 | 1 | 1 DBH-AS1          | -      |
| ENSG00000225768 | 3.724485 | -2.294189 | 1 | 1 RP11-127O4.3     | -      |
| ENSG00000225831 | 3.724485 | -2.294189 | 1 | 1 RPS18P1          | -      |
| ENSG00000225912 | 3.724485 | -2.294189 | 1 | 1 RP13-258O15.1    | K02898 |
| ENSG00000225951 | 3.724485 | -2.294189 | 1 | 1 ODF2-AS1         | -      |
| ENSG00000225969 | 3.724485 | -2.294189 | 1 | 1 LINC00035        | -      |
| ENSG00000225972 | 3.724485 | -2.294189 | 1 | 1 MTND1P23         | K03878 |
| ENSG00000226017 | 3.724485 | -2.294189 | 1 | 1 PRICKLE2-AS3     | -      |
| ENSG00000226040 | 3.724485 | -2.294189 | 1 | 1 AC005740.3       | K02437 |
| ENSG00000226074 | 3.724485 | -2.294189 | 1 | 1 PRSS44           | -      |
| ENSG00000226220 | 3.724485 | -2.294189 | 1 | 1 CICP22           | K16941 |
| ENSG00000226241 | 3.724485 | -2.294189 | 1 | 1 LL0XNC01-221F2.2 | -      |
| ENSG00000226251 | 3.724485 | -2.294189 | 1 | 1 RP11-151I1.3     | -      |
| ENSG00000226359 | 3.724485 | -2.294189 | 1 | 1 AC055811.5       | K05692 |
| ENSG00000226364 | 3.724485 | -2.294189 | 1 | 1 AC102948.2       | -      |
| ENSG00000226423 | 3.724485 | -2.294189 | 1 | 1 AC093642.4       | -      |
| ENSG00000226469 | 3.724485 | -2.294189 | 1 | 1 ADAM1B           | K09537 |
| ENSG00000226493 | 3.724485 | -2.294189 | 1 | 1 RP11-524O24.2    | K02898 |
| ENSG00000226497 | 3.724485 | -2.294189 | 1 | 1 RP11-406O16.1    | -      |
| ENSG00000226604 | 3.724485 | -2.294189 | 1 | 1 PAPPA-AS2        | -      |
| ENSG00000226789 | 3.724485 | -2.294189 | 1 | 1 AC110926.4       | K12866 |
| ENSG00000226808 | 3.724485 | -2.294189 | 1 | 1 LINC00840        | -      |
| ENSG00000226812 | 3.724485 | -2.294189 | 1 | 1 RP5-881L22.5     | -      |
| ENSG00000226872 | 3.724485 | -2.294189 | 1 | 1 AC002472.11      | -      |
| ENSG00000226877 | 3.724485 | -2.294189 | 1 | 1 RP11-575L7.2     | -      |
| ENSG00000226913 | 3.724485 | -2.294189 | 1 | 1 BSN-AS2          | -      |
| ENSG00000227038 | 3.724485 | -2.294189 | 1 | 1 AC005077.12      | K15696 |
| ENSG00000227076 | 3.724485 | -2.294189 | 1 | 1 RP11-4C20.4      | -      |
| ENSG00000227116 | 3.724485 | -2.294189 | 1 | 1 RP3-471C18.1     | -      |
| ENSG00000227141 | 3.724485 | -2.294189 | 1 | 1 RP11-545A16.3    | K12491 |
| ENSG00000227172 | 3.724485 | -2.294189 | 1 | 1 AC011290.4       | -      |
| ENSG00000227290 | 3.724485 | -2.294189 | 1 | 1 RP4-544H6.2      | -      |
| ENSG00000227413 | 3.724485 | -2.294189 | 1 | 1 RP5-1042K10.12   | -      |
| ENSG00000227431 | 3.724485 | -2.294189 | 1 | 1 RP1-155G6.4      | -      |
| ENSG00000227463 | 3.724485 | -2.294189 | 1 | 1 RP11-158D2.2     | -      |
| ENSG00000227581 | 3.724485 | -2.294189 | 1 | 1 RP13-140E4.1     | K17597 |
| ENSG00000227582 | 3.724485 | -2.294189 | 1 | 1 RP11-262H14.7    | K08458 |
| ENSG00000227692 | 3.724485 | -2.294189 | 1 | 1 MED28P3          | K15141 |
| ENSG00000227719 | 3.724485 | -2.294189 | 1 | 1 AC006042.6       | -      |
| ENSG00000227725 | 3.724485 | -2.294189 | 1 | 1 GCOM2            | -      |
| ENSG00000227838 | 3.724485 | -2.294189 | 1 | 1 RP1-213J1P__B.1  | -      |
| ENSG00000227857 | 3.724485 | -2.294189 | 1 | 1 RP4-533D7.5      | -      |
| ENSG00000227948 | 3.724485 | -2.294189 | 1 | 1 AC003989.4       | K01940 |
| ENSG00000228008 | 3.724485 | -2.294189 | 1 | 1 CTD-2330K9.3     | -      |
| ENSG00000228032 | 3.724485 | -2.294189 | 1 | 1 C14orf144        | -      |
| ENSG00000228040 | 3.724485 | -2.294189 | 1 | 1 RP3-522D1.2      | K02924 |

|                 |          |           |   |                 |        |
|-----------------|----------|-----------|---|-----------------|--------|
| ENSG00000228072 | 3.724485 | -2.294189 | 1 | 1 RP11-255A11.2 | -      |
| ENSG00000228259 | 3.724485 | -2.294189 | 1 | 1 AC136604.1    | -      |
| ENSG00000228278 | 3.724485 | -2.294189 | 1 | 1 ORM2          | K17308 |
| ENSG00000228470 | 3.724485 | -2.294189 | 1 | 1 RP11-176D17.3 | -      |
| ENSG00000228477 | 3.724485 | -2.294189 | 1 | 1 RP3-342P20.2  | K02981 |
| ENSG00000228507 | 3.724485 | -2.294189 | 1 | 1 DAP3P2        | K17408 |
| ENSG00000228525 | 3.724485 | -2.294189 | 1 | 1 RP5-1087E8.2  | -      |
| ENSG00000228612 | 3.724485 | -2.294189 | 1 | 1 HK2P1         | K00844 |
| ENSG00000228620 | 3.724485 | -2.294189 | 1 | 1 RP3-434P1.6   | -      |
| ENSG00000228677 | 3.724485 | -2.294189 | 1 | 1 TTC3-AS1      | -      |
| ENSG00000228679 | 3.724485 | -2.294189 | 1 | 1 RP4-676J13.2  | -      |
| ENSG00000228702 | 3.724485 | -2.294189 | 1 | 1 RP11-671E7.1  | K18708 |
| ENSG00000228718 | 3.724485 | -2.294189 | 1 | 1 RP11-145H9.3  | -      |
| ENSG00000228810 | 3.724485 | -2.294189 | 1 | 1 PABPC1P11     | K12581 |
| ENSG00000228829 | 3.724485 | -2.294189 | 1 | 1 AC005077.5    | K03121 |
| ENSG00000228834 | 3.724485 | -2.294189 | 1 | 1 RP11-249L21.4 | K02130 |
| ENSG00000228887 | 3.724485 | -2.294189 | 1 | 1 EEF1DP1       | K15410 |
| ENSG00000228919 | 3.724485 | -2.294189 | 1 | 1 AC097381.1    | -      |
| ENSG00000228949 | 3.724485 | -2.294189 | 1 | 1 UGT1A12P      | K00699 |
| ENSG00000228976 | 3.724485 | -2.294189 | 1 | 1 SUMO2P8       | K12160 |
| ENSG00000228983 | 3.724485 | -2.294189 | 1 | 1 AC025627.7    | K03327 |
| ENSG00000229162 | 3.724485 | -2.294189 | 1 | 1 RP11-84D1.1   | -      |
| ENSG00000229168 | 3.724485 | -2.294189 | 1 | 1 RPL19P20      | K02885 |
| ENSG00000229191 | 3.724485 | -2.294189 | 1 | 1 RP11-168O16.1 | -      |
| ENSG00000229282 | 3.724485 | -2.294189 | 1 | 1 RP1-40E16.2   | -      |
| ENSG00000229344 | 3.724485 | -2.294189 | 1 | 1 RP5-857K21.7  | K02261 |
| ENSG00000229497 | 3.724485 | -2.294189 | 1 | 1 AC005189.6    | -      |
| ENSG00000229519 | 3.724485 | -2.294189 | 1 | 1 RP11-58A11.2  | K02915 |
| ENSG00000229523 | 3.724485 | -2.294189 | 1 | 1 RP11-7G23.4   | -      |
| ENSG00000229605 | 3.724485 | -2.294189 | 1 | 1 RP11-492M23.2 | K02889 |
| ENSG00000229628 | 3.724485 | -2.294189 | 1 | 1 AC073115.7    | -      |
| ENSG00000229648 | 3.724485 | -2.294189 | 1 | 1 AC016753.7    | K02998 |
| ENSG00000229659 | 3.724485 | -2.294189 | 1 | 1 RP11-345K20.2 | K02898 |
| ENSG00000229660 | 3.724485 | -2.294189 | 1 | 1 RP5-1142J19.1 | -      |
| ENSG00000229676 | 3.724485 | -2.294189 | 1 | 1 ZNF492        | K09228 |
| ENSG00000229821 | 3.724485 | -2.294189 | 1 | 1 RP11-567E21.3 | -      |
| ENSG00000229915 | 3.724485 | -2.294189 | 1 | 1 AC016999.2    | -      |
| ENSG00000229925 | 3.724485 | -2.294189 | 1 | 1 AP001043.1    | -      |
| ENSG00000229990 | 3.724485 | -2.294189 | 1 | 1 RP11-574K11.8 | -      |
| ENSG00000230005 | 3.724485 | -2.294189 | 1 | 1 SNAP47-AS1    | -      |
| ENSG00000230020 | 3.724485 | -2.294189 | 1 | 1 NHS-AS1       | -      |
| ENSG00000230047 | 3.724485 | -2.294189 | 1 | 1 AC017104.4    | -      |
| ENSG00000230054 | 3.724485 | -2.294189 | 1 | 1 RP11-402G3.5  | -      |
| ENSG00000230321 | 3.724485 | -2.294189 | 1 | 1 CTD-3105H18.9 | -      |
| ENSG00000230394 | 3.724485 | -2.294189 | 1 | 1 RP11-692P14.1 | -      |
| ENSG00000230395 | 3.724485 | -2.294189 | 1 | 1 AC092651.1    | K03348 |
| ENSG00000230444 | 3.724485 | -2.294189 | 1 | 1 TFAMP1        | K11830 |
| ENSG00000230459 | 3.724485 | -2.294189 | 1 | 1 RP11-741G21.1 | K11300 |
| ENSG00000230468 | 3.724485 | -2.294189 | 1 | 1 CLUHP5        | -      |
| ENSG00000230495 | 3.724485 | -2.294189 | 1 | 1 RP11-462D18.2 | K07863 |
| ENSG00000230500 | 3.724485 | -2.294189 | 1 | 1 RP11-360I20.2 | -      |
| ENSG00000230516 | 3.724485 | -2.294189 | 1 | 1 RP11-555J4.3  | -      |
| ENSG00000230550 | 3.724485 | -2.294189 | 1 | 1 RP11-74C13.3  | -      |
| ENSG00000230587 | 3.724485 | -2.294189 | 1 | 1 AC093609.1    | -      |
| ENSG00000230684 | 3.724485 | -2.294189 | 1 | 1 RP11-409K20.6 | -      |
| ENSG00000230694 | 3.724485 | -2.294189 | 1 | 1 RP11-62F24.1  | -      |
| ENSG00000230747 | 3.724485 | -2.294189 | 1 | 1 AC021188.4    | -      |
| ENSG00000230758 | 3.724485 | -2.294189 | 1 | 1 SNAP23P       | K08508 |

|                 |          |           |   |                 |        |
|-----------------|----------|-----------|---|-----------------|--------|
| ENSG00000230832 | 3.724485 | -2.294189 | 1 | 1 RP11-325P15.2 | K11090 |
| ENSG00000230872 | 3.724485 | -2.294189 | 1 | 1 AC092338.5    | -      |
| ENSG00000230914 | 3.724485 | -2.294189 | 1 | 1 AC004840.8    | -      |
| ENSG00000230927 | 3.724485 | -2.294189 | 1 | 1 TMBIM7P       | -      |
| ENSG00000231027 | 3.724485 | -2.294189 | 1 | 1 AC079325.6    | K06719 |
| ENSG00000231104 | 3.724485 | -2.294189 | 1 | 1 RP11-354M20.3 | -      |
| ENSG00000231170 | 3.724485 | -2.294189 | 1 | 1 AC002451.3    | -      |
| ENSG00000231187 | 3.724485 | -2.294189 | 1 | 1 RP11-38L15.3  | -      |
| ENSG00000231193 | 3.724485 | -2.294189 | 1 | 1 RP11-462B18.2 | -      |
| ENSG00000231335 | 3.724485 | -2.294189 | 1 | 1 AC107072.2    | -      |
| ENSG00000231403 | 3.724485 | -2.294189 | 1 | 1 AC099344.3    | -      |
| ENSG00000231518 | 3.724485 | -2.294189 | 1 | 1 RP11-327L3.3  | -      |
| ENSG00000231544 | 3.724485 | -2.294189 | 1 | 1 RSL24D1P11    | K02896 |
| ENSG00000231564 | 3.724485 | -2.294189 | 1 | 1 EIF4A1P11     | K03257 |
| ENSG00000231686 | 3.724485 | -2.294189 | 1 | 1 RP1-203P18.1  | -      |
| ENSG00000231726 | 3.724485 | -2.294189 | 1 | 1 HMGN2P38      | K11300 |
| ENSG00000231804 | 3.724485 | -2.294189 | 1 | 1 RP11-317B17.3 | K02889 |
| ENSG00000231868 | 3.724485 | -2.294189 | 1 | 1 RP1-202O8.2   | -      |
| ENSG00000231992 | 3.724485 | -2.294189 | 1 | 1 RP11-57H12.2  | -      |
| ENSG00000232002 | 3.724485 | -2.294189 | 1 | 1 AC093642.6    | -      |
| ENSG00000232046 | 3.724485 | -2.294189 | 1 | 1 AC007392.3    | -      |
| ENSG00000232129 | 3.724485 | -2.294189 | 1 | 1 AC011385.2    | K12581 |
| ENSG00000232131 | 3.724485 | -2.294189 | 1 | 1 NCOA7-AS1     | -      |
| ENSG00000232133 | 3.724485 | -2.294189 | 1 | 1 IMPDH1P10     | K00088 |
| ENSG00000232166 | 3.724485 | -2.294189 | 1 | 1 RP4-799P18.5  | K02940 |
| ENSG00000232224 | 3.724485 | -2.294189 | 1 | 1 LINC00202-1   | -      |
| ENSG00000232228 | 3.724485 | -2.294189 | 1 | 1 RP11-77O7.1   | K02929 |
| ENSG00000232229 | 3.724485 | -2.294189 | 1 | 1 LINC00865     | -      |
| ENSG00000232316 | 3.724485 | -2.294189 | 1 | 1 RP1-124C6.1   | -      |
| ENSG00000232362 | 3.724485 | -2.294189 | 1 | 1 ATP5LP2       | K02140 |
| ENSG00000232396 | 3.724485 | -2.294189 | 1 | 1 RP1-76B20.11  | -      |
| ENSG00000232448 | 3.724485 | -2.294189 | 1 | 1 RP11-416N4.1  | -      |
| ENSG00000232479 | 3.724485 | -2.294189 | 1 | 1 AC010900.2    | K07605 |
| ENSG00000232487 | 3.724485 | -2.294189 | 1 | 1 RASA3-IT1     | -      |
| ENSG00000232526 | 3.724485 | -2.294189 | 1 | 1 AC025750.6    | K05862 |
| ENSG00000232568 | 3.724485 | -2.294189 | 1 | 1 RPL23AP35     | K02893 |
| ENSG00000232586 | 3.724485 | -2.294189 | 1 | 1 RP11-46A10.4  | -      |
| ENSG00000232623 | 3.724485 | -2.294189 | 1 | 1 AP000266.7    | -      |
| ENSG00000232646 | 3.724485 | -2.294189 | 1 | 1 RP11-344N10.4 | -      |
| ENSG00000232699 | 3.724485 | -2.294189 | 1 | 1 BDH2P1        | K00019 |
| ENSG00000232777 | 3.724485 | -2.294189 | 1 | 1 MRPL51P2      | K17432 |
| ENSG00000232926 | 3.724485 | -2.294189 | 1 | 1 AC000078.5    | -      |
| ENSG00000232949 | 3.724485 | -2.294189 | 1 | 1 AC002480.4    | -      |
| ENSG00000233125 | 3.724485 | -2.294189 | 1 | 1 ACTBP12       | K05692 |
| ENSG00000233332 | 3.724485 | -2.294189 | 1 | 1 RP4-799P18.2  | -      |
| ENSG00000233343 | 3.724485 | -2.294189 | 1 | 1 ATP6V1G1P4    | -      |
| ENSG00000233369 | 3.724485 | -2.294189 | 1 | 1 RP11-396K3.1  | K03121 |
| ENSG00000233392 | 3.724485 | -2.294189 | 1 | 1 AC104809.4    | -      |
| ENSG00000233431 | 3.724485 | -2.294189 | 1 | 1 RP11-63N8.3   | -      |
| ENSG00000233518 | 3.724485 | -2.294189 | 1 | 1 RPL7P35       | K02937 |
| ENSG00000233521 | 3.724485 | -2.294189 | 1 | 1 RP5-1172A22.1 | -      |
| ENSG00000233593 | 3.724485 | -2.294189 | 1 | 1 RP4-665J23.1  | -      |
| ENSG00000233635 | 3.724485 | -2.294189 | 1 | 1 AC037445.1    | -      |
| ENSG00000233684 | 3.724485 | -2.294189 | 1 | 1 AC079779.6    | -      |
| ENSG00000233690 | 3.724485 | -2.294189 | 1 | 1 EBAG9P1       | -      |
| ENSG00000233694 | 3.724485 | -2.294189 | 1 | 1 AC007365.1    | -      |
| ENSG00000233725 | 3.724485 | -2.294189 | 1 | 1 LINC00284     | -      |
| ENSG00000233821 | 3.724485 | -2.294189 | 1 | 1 ENOX1-AS1     | -      |

|                 |          |           |   |                   |        |
|-----------------|----------|-----------|---|-------------------|--------|
| ENSG00000233827 | 3.724485 | -2.294189 | 1 | 1 FAM58BP         | -      |
| ENSG00000233877 | 3.724485 | -2.294189 | 1 | 1 RP11-182I10.2   | -      |
| ENSG00000233963 | 3.724485 | -2.294189 | 1 | 1 ATP8A2P3        | K14802 |
| ENSG00000233978 | 3.724485 | -2.294189 | 1 | 1 AC016735.3      | -      |
| ENSG00000234017 | 3.724485 | -2.294189 | 1 | 1 RP11-214N15.5   | K03231 |
| ENSG00000234136 | 3.724485 | -2.294189 | 1 | 1 AC055764.1      | -      |
| ENSG00000234148 | 3.724485 | -2.294189 | 1 | 1 RP11-395L14.3   | -      |
| ENSG00000234324 | 3.724485 | -2.294189 | 1 | 1 RPL9P2          | K02940 |
| ENSG00000234371 | 3.724485 | -2.294189 | 1 | 1 RP11-315J22.5   | K02998 |
| ENSG00000234393 | 3.724485 | -2.294189 | 1 | 1 RP11-211N11.5   | -      |
| ENSG00000234423 | 3.724485 | -2.294189 | 1 | 1 AC019118.2      | -      |
| ENSG00000234471 | 3.724485 | -2.294189 | 1 | 1 AC147651.1      | -      |
| ENSG00000234562 | 3.724485 | -2.294189 | 1 | 1 TPMTP2          | K00569 |
| ENSG00000234698 | 3.724485 | -2.294189 | 1 | 1 RP11-112L6.2    | -      |
| ENSG00000234709 | 3.724485 | -2.294189 | 1 | 1 UPF3AP3         | K14328 |
| ENSG00000234718 | 3.724485 | -2.294189 | 1 | 1 AC007161.5      | -      |
| ENSG00000234826 | 3.724485 | -2.294189 | 1 | 1 AC003084.2      | -      |
| ENSG00000234919 | 3.724485 | -2.294189 | 1 | 1 AC064834.3      | -      |
| ENSG00000234925 | 3.724485 | -2.294189 | 1 | 1 RP11-254B13.3   | K02138 |
| ENSG00000234973 | 3.724485 | -2.294189 | 1 | 1 RP11-272J7.4    | -      |
| ENSG00000234986 | 3.724485 | -2.294189 | 1 | 1 XX-C2158C12.1   | -      |
| ENSG00000235084 | 3.724485 | -2.294189 | 1 | 1 CHCHD2P6        | K00901 |
| ENSG00000235284 | 3.724485 | -2.294189 | 1 | 1 SNORD62A        | -      |
| ENSG00000235330 | 3.724485 | -2.294189 | 1 | 1 RP11-165F24.2   | K02870 |
| ENSG00000235422 | 3.724485 | -2.294189 | 1 | 1 KATNBL1P3       | -      |
| ENSG00000235565 | 3.724485 | -2.294189 | 1 | 1 RP11-86H7.7     | -      |
| ENSG00000235643 | 3.724485 | -2.294189 | 1 | 1 RP1-69M21.2     | -      |
| ENSG00000235664 | 3.724485 | -2.294189 | 1 | 1 AC005682.8      | -      |
| ENSG00000235704 | 3.724485 | -2.294189 | 1 | 1 AC023490.2      | -      |
| ENSG00000235746 | 3.724485 | -2.294189 | 1 | 1 CTBP2P2         | K04496 |
| ENSG00000235760 | 3.724485 | -2.294189 | 1 | 1 AC138655.4      | -      |
| ENSG00000235957 | 3.724485 | -2.294189 | 1 | 1 COX7CP1         | K02272 |
| ENSG00000235990 | 3.724485 | -2.294189 | 1 | 1 RP11-323D18.5   | K02893 |
| ENSG00000236049 | 3.724485 | -2.294189 | 1 | 1 AC104777.2      | -      |
| ENSG00000236055 | 3.724485 | -2.294189 | 1 | 1 RP11-423O2.2    | -      |
| ENSG00000236120 | 3.724485 | -2.294189 | 1 | 1 RP11-733O18.1   | -      |
| ENSG00000236155 | 3.724485 | -2.294189 | 1 | 1 RP11-231P20.2   | -      |
| ENSG00000236226 | 3.724485 | -2.294189 | 1 | 1 RP11-645N11.3   | -      |
| ENSG00000236318 | 3.724485 | -2.294189 | 1 | 1 AC019117.1      | -      |
| ENSG00000236430 | 3.724485 | -2.294189 | 1 | 1 KRT8P29         | K07605 |
| ENSG00000236463 | 3.724485 | -2.294189 | 1 | 1 LINC00427       | -      |
| ENSG00000236480 | 3.724485 | -2.294189 | 1 | 1 PKMP1           | K00873 |
| ENSG00000236483 | 3.724485 | -2.294189 | 1 | 1 CTD-3105H18.8   | -      |
| ENSG00000236512 | 3.724485 | -2.294189 | 1 | 1 RP3-336K20__B.2 | K02905 |
| ENSG00000236534 | 3.724485 | -2.294189 | 1 | 1 H3F3BP1         | K11253 |
| ENSG00000236546 | 3.724485 | -2.294189 | 1 | 1 RP1-118J21.5    | -      |
| ENSG00000236549 | 3.724485 | -2.294189 | 1 | 1 AC079807.3      | K02977 |
| ENSG00000236567 | 3.724485 | -2.294189 | 1 | 1 RP11-39K24.7    | K09063 |
| ENSG00000236583 | 3.724485 | -2.294189 | 1 | 1 AP004290.1      | K17392 |
| ENSG00000236616 | 3.724485 | -2.294189 | 1 | 1 BAK1P2          | K14021 |
| ENSG00000236678 | 3.724485 | -2.294189 | 1 | 1 LINC00347       | -      |
| ENSG00000236756 | 3.724485 | -2.294189 | 1 | 1 DNAJC9-AS1      | -      |
| ENSG00000236942 | 3.724485 | -2.294189 | 1 | 1 RP11-6B6.3      | K08341 |
| ENSG00000236977 | 3.724485 | -2.294189 | 1 | 1 ANKRD44-IT1     | -      |
| ENSG00000237088 | 3.724485 | -2.294189 | 1 | 1 RP11-73E6.2     | K02936 |
| ENSG00000237136 | 3.724485 | -2.294189 | 1 | 1 C4orf51         | -      |
| ENSG00000237139 | 3.724485 | -2.294189 | 1 | 1 RP11-137L10.5   | K02976 |
| ENSG00000237271 | 3.724485 | -2.294189 | 1 | 1 AC009498.1      | -      |

|                 |          |           |   |                  |        |
|-----------------|----------|-----------|---|------------------|--------|
| ENSG00000237328 | 3.724485 | -2.294189 | 1 | 1 RAI1-AS1       | -      |
| ENSG00000237377 | 3.724485 | -2.294189 | 1 | 1 AC005703.2     | -      |
| ENSG00000237416 | 3.724485 | -2.294189 | 1 | 1 RP11-465K1.2   | -      |
| ENSG00000237483 | 3.724485 | -2.294189 | 1 | 1 RP11-423E7.1   | K02977 |
| ENSG00000237512 | 3.724485 | -2.294189 | 1 | 1 UNC5B-AS1      | -      |
| ENSG00000237588 | 3.724485 | -2.294189 | 1 | 1 RP11-66D17.3   | -      |
| ENSG00000237663 | 3.724485 | -2.294189 | 1 | 1 DNAJC19P7      | K09539 |
| ENSG00000237669 | 3.724485 | -2.294189 | 1 | 1 HCG4P3         | K06751 |
| ENSG00000237691 | 3.724485 | -2.294189 | 1 | 1 IFNWP2         | K05440 |
| ENSG00000237887 | 3.724485 | -2.294189 | 1 | 1 RPL23AP32      | K02893 |
| ENSG00000237934 | 3.724485 | -2.294189 | 1 | 1 RP11-467D18.2  | -      |
| ENSG00000237972 | 3.724485 | -2.294189 | 1 | 1 TUBG1P         | K10389 |
| ENSG00000238000 | 3.724485 | -2.294189 | 1 | 1 RP11-274E7.2   | K06697 |
| ENSG00000238140 | 3.724485 | -2.294189 | 1 | 1 RP11-253A20.1  | -      |
| ENSG00000238164 | 3.724485 | -2.294189 | 1 | 1 RP3-395M20.8   | -      |
| ENSG00000238222 | 3.724485 | -2.294189 | 1 | 1 MKRN4P         | K15687 |
| ENSG00000238231 | 3.724485 | -2.294189 | 1 | 1 RP11-460I13.6  | K06566 |
| ENSG00000238272 | 3.724485 | -2.294189 | 1 | 1 RP3-436N22.3   | -      |
| ENSG00000238280 | 3.724485 | -2.294189 | 1 | 1 RP11-436D10.3  | -      |
| ENSG00000238311 | 3.724485 | -2.294189 | 1 | 1 snoU13         | -      |
| ENSG00000238322 | 3.724485 | -2.294189 | 1 | 1 snoU13         | -      |
| ENSG00000238403 | 3.724485 | -2.294189 | 1 | 1 snoU13         | -      |
| ENSG00000238475 | 3.724485 | -2.294189 | 1 | 1 snoU13         | -      |
| ENSG00000238533 | 3.724485 | -2.294189 | 1 | 1 snoU13         | -      |
| ENSG00000238534 | 3.724485 | -2.294189 | 1 | 1 Y_RNA          | -      |
| ENSG00000238711 | 3.724485 | -2.294189 | 1 | 1 RNY4P25        | -      |
| ENSG00000238754 | 3.724485 | -2.294189 | 1 | 1 snoU109        | -      |
| ENSG00000238791 | 3.724485 | -2.294189 | 1 | 1 snoU13         | -      |
| ENSG00000238831 | 3.724485 | -2.294189 | 1 | 1 RNU7-189P      | -      |
| ENSG00000238834 | 3.724485 | -2.294189 | 1 | 1 snoU13         | -      |
| ENSG00000238857 | 3.724485 | -2.294189 | 1 | 1 snoU13         | -      |
| ENSG00000238920 | 3.724485 | -2.294189 | 1 | 1 snoU13         | -      |
| ENSG00000238934 | 3.724485 | -2.294189 | 1 | 1 ACA64          | -      |
| ENSG00000238948 | 3.724485 | -2.294189 | 1 | 1 snoU13         | -      |
| ENSG00000238995 | 3.724485 | -2.294189 | 1 | 1 snoU13         | -      |
| ENSG00000239079 | 3.724485 | -2.294189 | 1 | 1 snoU13         | -      |
| ENSG00000239125 | 3.724485 | -2.294189 | 1 | 1 snoU13         | -      |
| ENSG00000239183 | 3.724485 | -2.294189 | 1 | 1 SNORA84        | -      |
| ENSG00000239198 | 3.724485 | -2.294189 | 1 | 1 RPL5P22        | K02932 |
| ENSG00000239254 | 3.724485 | -2.294189 | 1 | 1 RP11-365F18.3  | K18403 |
| ENSG00000239351 | 3.724485 | -2.294189 | 1 | 1 NPM1P29        | K11276 |
| ENSG00000239377 | 3.724485 | -2.294189 | 1 | 1 RP4-584D14.6   | -      |
| ENSG00000239602 | 3.724485 | -2.294189 | 1 | 1 RP11-449H3.1   | K02917 |
| ENSG00000239614 | 3.724485 | -2.294189 | 1 | 1 HMGN1P7        | K11299 |
| ENSG00000239774 | 3.724485 | -2.294189 | 1 | 1 RP11-496B10.3  | -      |
| ENSG00000239821 | 3.724485 | -2.294189 | 1 | 1 RN7SL513P      | -      |
| ENSG00000239883 | 3.724485 | -2.294189 | 1 | 1 RP11-175I17.2  | K07759 |
| ENSG00000239899 | 3.724485 | -2.294189 | 1 | 1 RN7SL674P      | -      |
| ENSG00000239919 | 3.724485 | -2.294189 | 1 | 1 SNRPGP3        | K11099 |
| ENSG00000240021 | 3.724485 | -2.294189 | 1 | 1 TEX35          | -      |
| ENSG00000240093 | 3.724485 | -2.294189 | 1 | 1 AC093627.12    | -      |
| ENSG00000240219 | 3.724485 | -2.294189 | 1 | 1 RP11-430C7.5   | -      |
| ENSG00000240305 | 3.724485 | -2.294189 | 1 | 1 RP11-1072C15.1 | K02934 |
| ENSG00000240322 | 3.724485 | -2.294189 | 1 | 1 RN7SL481P      | -      |
| ENSG00000240338 | 3.724485 | -2.294189 | 1 | 1 RP11-331F4.4   | K01310 |
| ENSG00000240385 | 3.724485 | -2.294189 | 1 | 1 RPS29P20       | -      |
| ENSG00000240401 | 3.724485 | -2.294189 | 1 | 1 AC012358.8     | -      |
| ENSG00000240687 | 3.724485 | -2.294189 | 1 | 1 RP11-521D12.1  | -      |

|                 |          |           |   |                 |        |
|-----------------|----------|-----------|---|-----------------|--------|
| ENSG00000240694 | 3.724485 | -2.294189 | 1 | 1 PNMA2         | -      |
| ENSG00000240710 | 3.724485 | -2.294189 | 1 | 1 RP11-430C7.4  | -      |
| ENSG00000240720 | 3.724485 | -2.294189 | 1 | 1 LRRD1         | -      |
| ENSG00000240723 | 3.724485 | -2.294189 | 1 | 1 RN7SL382P     | -      |
| ENSG00000240882 | 3.724485 | -2.294189 | 1 | 1 RP11-174O3.1  | K15168 |
| ENSG00000240991 | 3.724485 | -2.294189 | 1 | 1 RPL23AP67     | K02893 |
| ENSG00000241007 | 3.724485 | -2.294189 | 1 | 1 SEPT7P6       | K16944 |
| ENSG00000241095 | 3.724485 | -2.294189 | 1 | 1 CYP51A1P1     | K05917 |
| ENSG00000241362 | 3.724485 | -2.294189 | 1 | 1 RPL36AP43     | K02929 |
| ENSG00000241369 | 3.724485 | -2.294189 | 1 | 1 CT64          | -      |
| ENSG00000241413 | 3.724485 | -2.294189 | 1 | 1 RN7SL441P     | -      |
| ENSG00000241416 | 3.724485 | -2.294189 | 1 | 1 KRT8P13       | K07605 |
| ENSG00000241535 | 3.724485 | -2.294189 | 1 | 1 CBX5P1        | K11587 |
| ENSG00000241568 | 3.724485 | -2.294189 | 1 | 1 RN7SL338P     | -      |
| ENSG00000241593 | 3.724485 | -2.294189 | 1 | 1 RP11-520D19.2 | -      |
| ENSG00000241631 | 3.724485 | -2.294189 | 1 | 1 RN7SL316P     | -      |
| ENSG00000241735 | 3.724485 | -2.294189 | 1 | 1 FABP5P3       | K08754 |
| ENSG00000241738 | 3.724485 | -2.294189 | 1 | 1 ZNF90P1       | K09228 |
| ENSG00000241772 | 3.724485 | -2.294189 | 1 | 1 AC092620.2    | -      |
| ENSG00000241811 | 3.724485 | -2.294189 | 1 | 1 RN7SL651P     | -      |
| ENSG00000241879 | 3.724485 | -2.294189 | 1 | 1 KLF3P2        | -      |
| ENSG00000242058 | 3.724485 | -2.294189 | 1 | 1 RPS4XP19      | K02987 |
| ENSG00000242173 | 3.724485 | -2.294189 | 1 | 1 ARHGDIG       | K12462 |
| ENSG00000242398 | 3.724485 | -2.294189 | 1 | 1 RN7SL800P     | -      |
| ENSG00000242477 | 3.724485 | -2.294189 | 1 | 1 CTD-2161E19.1 | K02865 |
| ENSG00000242551 | 3.724485 | -2.294189 | 1 | 1 POU5F1P6      | K09367 |
| ENSG00000242748 | 3.724485 | -2.294189 | 1 | 1 RPL23AP81     | K02893 |
| ENSG00000242882 | 3.724485 | -2.294189 | 1 | 1 RPL5P11       | K02932 |
| ENSG00000242888 | 3.724485 | -2.294189 | 1 | 1 RP11-436M15.1 | K02981 |
| ENSG00000242941 | 3.724485 | -2.294189 | 1 | 1 CTD-2325P2.2  | K02870 |
| ENSG00000243018 | 3.724485 | -2.294189 | 1 | 1 RP5-1070G24.2 | -      |
| ENSG00000243088 | 3.724485 | -2.294189 | 1 | 1 RN7SL539P     | -      |
| ENSG00000243089 | 3.724485 | -2.294189 | 1 | 1 RP11-779P15.2 | -      |
| ENSG00000243130 | 3.724485 | -2.294189 | 1 | 1 PSG11         | K06500 |
| ENSG00000243307 | 3.724485 | -2.294189 | 1 | 1 RP11-239L20.3 | -      |
| ENSG00000243385 | 3.724485 | -2.294189 | 1 | 1 CTD-2110K23.1 | -      |
| ENSG00000243388 | 3.724485 | -2.294189 | 1 | 1 RPL3P3        | K02925 |
| ENSG00000243402 | 3.724485 | -2.294189 | 1 | 1 RP11-473O4.1  | K02877 |
| ENSG00000243433 | 3.724485 | -2.294189 | 1 | 1 RP11-148K1.10 | -      |
| ENSG00000243533 | 3.724485 | -2.294189 | 1 | 1 TBCE-AS1      | -      |
| ENSG00000243871 | 3.724485 | -2.294189 | 1 | 1 RN7SL487P     | -      |
| ENSG00000243910 | 3.724485 | -2.294189 | 1 | 1 TUBA4B        | K07374 |
| ENSG00000243959 | 3.724485 | -2.294189 | 1 | 1 RN7SL684P     | -      |
| ENSG00000244045 | 3.724485 | -2.294189 | 1 | 1 TMEM199       | -      |
| ENSG00000244061 | 3.724485 | -2.294189 | 1 | 1 RP11-389C8.1  | K02865 |
| ENSG00000244063 | 3.724485 | -2.294189 | 1 | 1 AC024704.2    | -      |
| ENSG00000244131 | 3.724485 | -2.294189 | 1 | 1 RPSAP51       | K02998 |
| ENSG00000244134 | 3.724485 | -2.294189 | 1 | 1 RPS12P20      | K02951 |
| ENSG00000244236 | 3.724485 | -2.294189 | 1 | 1 RN7SL604P     | -      |
| ENSG00000244280 | 3.724485 | -2.294189 | 1 | 1 ECEL1P2       | K09610 |
| ENSG00000244378 | 3.724485 | -2.294189 | 1 | 1 RPS2P45       | K02981 |
| ENSG00000244677 | 3.724485 | -2.294189 | 1 | 1 RN7SL706P     | -      |
| ENSG00000244691 | 3.724485 | -2.294189 | 1 | 1 RP11-600F24.2 | K02865 |
| ENSG00000244701 | 3.724485 | -2.294189 | 1 | 1 RP5-894A10.2  | -      |
| ENSG00000244921 | 3.724485 | -2.294189 | 1 | 1 CTB-36O1.7    | K00412 |
| ENSG00000245205 | 3.724485 | -2.294189 | 1 | 1 EEF1A1P4      | K03231 |
| ENSG00000245311 | 3.724485 | -2.294189 | 1 | 1 RP11-165P7.1  | -      |
| ENSG00000245954 | 3.724485 | -2.294189 | 1 | 1 RP11-18H21.1  | -      |

|                 |          |           |   |                   |        |
|-----------------|----------|-----------|---|-------------------|--------|
| ENSG00000246863 | 3.724485 | -2.294189 | 1 | 1 RP11-325N19.3   | -      |
| ENSG00000247311 | 3.724485 | -2.294189 | 1 | 1 CTC-441N14.2    | -      |
| ENSG00000247324 | 3.724485 | -2.294189 | 1 | 1 RP11-510M2.2    | -      |
| ENSG00000247925 | 3.724485 | -2.294189 | 1 | 1 RP3-510L9.1     | -      |
| ENSG00000248394 | 3.724485 | -2.294189 | 1 | 1 FOSL1P1         | K04502 |
| ENSG00000248416 | 3.724485 | -2.294189 | 1 | 1 RP11-1191J2.4   | -      |
| ENSG00000248521 | 3.724485 | -2.294189 | 1 | 1 RP11-174F8.1    | K10568 |
| ENSG00000248568 | 3.724485 | -2.294189 | 1 | 1 KRT8P48         | K07605 |
| ENSG00000248714 | 3.724485 | -2.294189 | 1 | 1 RP11-1079K10.3  | -      |
| ENSG00000248794 | 3.724485 | -2.294189 | 1 | 1 CTD-2248H3.1    | K02951 |
| ENSG00000248795 | 3.724485 | -2.294189 | 1 | 1 RP11-173E2.1    | K11883 |
| ENSG00000248863 | 3.724485 | -2.294189 | 1 | 1 RP11-83A24.1    | -      |
| ENSG00000248909 | 3.724485 | -2.294189 | 1 | 1 HMGB1P21        | K10802 |
| ENSG00000248916 | 3.724485 | -2.294189 | 1 | 1 NUP210P3        | K14314 |
| ENSG00000249053 | 3.724485 | -2.294189 | 1 | 1 RP11-419C19.1   | -      |
| ENSG00000249096 | 3.724485 | -2.294189 | 1 | 1 RP11-290F5.1    | -      |
| ENSG00000249119 | 3.724485 | -2.294189 | 1 | 1 MTND6P4         | K03884 |
| ENSG00000249176 | 3.724485 | -2.294189 | 1 | 1 RP11-304F15.5   | K14815 |
| ENSG00000249242 | 3.724485 | -2.294189 | 1 | 1 TMEM150C        | -      |
| ENSG00000249428 | 3.724485 | -2.294189 | 1 | 1 RP11-503N18.3   | -      |
| ENSG00000249437 | 3.724485 | -2.294189 | 1 | 1 NAIP            | K12807 |
| ENSG00000249441 | 3.724485 | -2.294189 | 1 | 1 RP11-94H6.1     | -      |
| ENSG00000249610 | 3.724485 | -2.294189 | 1 | 1 CTC-441N14.1    | -      |
| ENSG00000249680 | 3.724485 | -2.294189 | 1 | 1 TUBA3GP         | K07374 |
| ENSG00000249784 | 3.724485 | -2.294189 | 1 | 1 SCARNA22        | -      |
| ENSG00000249889 | 3.724485 | -2.294189 | 1 | 1 ALG1L11P        | K03842 |
| ENSG00000249923 | 3.724485 | -2.294189 | 1 | 1 XXbac-B444P24.8 | -      |
| ENSG00000250140 | 3.724485 | -2.294189 | 1 | 1 CTD-2517O10.5   | K02898 |
| ENSG00000250220 | 3.724485 | -2.294189 | 1 | 1 RP11-692D12.1   | -      |
| ENSG00000250261 | 3.724485 | -2.294189 | 1 | 1 AC007050.18     | -      |
| ENSG00000250280 | 3.724485 | -2.294189 | 1 | 1 RP11-305O6.3    | -      |
| ENSG00000250282 | 3.724485 | -2.294189 | 1 | 1 RP5-875H18.4    | -      |
| ENSG00000250332 | 3.724485 | -2.294189 | 1 | 1 CTD-2272G21.2   | K07293 |
| ENSG00000250508 | 3.724485 | -2.294189 | 1 | 1 RP11-757G1.6    | -      |
| ENSG00000250600 | 3.724485 | -2.294189 | 1 | 1 ROPN1L-AS1      | -      |
| ENSG00000250677 | 3.724485 | -2.294189 | 1 | 1 RP11-576N17.2   | -      |
| ENSG00000250749 | 3.724485 | -2.294189 | 1 | 1 RP11-451H23.1   | -      |
| ENSG00000250756 | 3.724485 | -2.294189 | 1 | 1 RP11-225B17.1   | K08376 |
| ENSG00000250882 | 3.724485 | -2.294189 | 1 | 1 CTC-459M5.1     | -      |
| ENSG00000250986 | 3.724485 | -2.294189 | 1 | 1 AC141928.1      | -      |
| ENSG00000251148 | 3.724485 | -2.294189 | 1 | 1 RP11-478C1.7    | -      |
| ENSG00000251171 | 3.724485 | -2.294189 | 1 | 1 RP11-327O17.2   | -      |
| ENSG00000251187 | 3.724485 | -2.294189 | 1 | 1 CTC-459M5.2     | -      |
| ENSG00000251314 | 3.724485 | -2.294189 | 1 | 1 CTD-2337A12.1   | -      |
| ENSG00000251350 | 3.724485 | -2.294189 | 1 | 1 RP11-328N19.1   | -      |
| ENSG00000251455 | 3.724485 | -2.294189 | 1 | 1 RP11-164P12.3   | -      |
| ENSG00000251461 | 3.724485 | -2.294189 | 1 | 1 RP11-501C14.6   | -      |
| ENSG00000251484 | 3.724485 | -2.294189 | 1 | 1 RP5-1065J22.4   | K12889 |
| ENSG00000251574 | 3.724485 | -2.294189 | 1 | 1 RP11-6N13.1     | -      |
| ENSG00000251590 | 3.724485 | -2.294189 | 1 | 1 NIFKP7          | K14838 |
| ENSG00000251596 | 3.724485 | -2.294189 | 1 | 1 HADHAP1         | K07515 |
| ENSG00000251685 | 3.724485 | -2.294189 | 1 | 1 RP11-813N20.1   | K00699 |
| ENSG00000251692 | 3.724485 | -2.294189 | 1 | 1 PTX4            | -      |
| ENSG00000251695 | 3.724485 | -2.294189 | 1 | 1 AC124890.1      | -      |
| ENSG00000251738 | 3.724485 | -2.294189 | 1 | 1 AC073215.1      | -      |
| ENSG00000251791 | 3.724485 | -2.294189 | 1 | 1 SCARNA6         | -      |
| ENSG00000251869 | 3.724485 | -2.294189 | 1 | 1 SCARNA23        | -      |
| ENSG00000251990 | 3.724485 | -2.294189 | 1 | 1 RNA5SP180       | -      |

|                 |          |           |   |                 |        |
|-----------------|----------|-----------|---|-----------------|--------|
| ENSG00000251992 | 3.724485 | -2.294189 | 1 | 1 SCARNA17      | --     |
| ENSG00000252010 | 3.724485 | -2.294189 | 1 | 1 SCARNA5       | --     |
| ENSG00000252021 | 3.724485 | -2.294189 | 1 | 1 Y_RNA         | --     |
| ENSG00000252070 | 3.724485 | -2.294189 | 1 | 1 RNA5SP341     | --     |
| ENSG00000252118 | 3.724485 | -2.294189 | 1 | 1 RNU6ATAC39P   | --     |
| ENSG00000252200 | 3.724485 | -2.294189 | 1 | 1 snoZ6         | --     |
| ENSG00000252234 | 3.724485 | -2.294189 | 1 | 1 AC006557.1    | --     |
| ENSG00000252355 | 3.724485 | -2.294189 | 1 | 1 RN7SKP287     | --     |
| ENSG00000252469 | 3.724485 | -2.294189 | 1 | 1 RNU7-160P     | --     |
| ENSG00000252543 | 3.724485 | -2.294189 | 1 | 1 U3            | --     |
| ENSG00000252549 | 3.724485 | -2.294189 | 1 | 1 RNU6-759P     | --     |
| ENSG00000252552 | 3.724485 | -2.294189 | 1 | 1 RNU6-307P     | --     |
| ENSG00000252590 | 3.724485 | -2.294189 | 1 | 1 RNU7-143P     | --     |
| ENSG00000252636 | 3.724485 | -2.294189 | 1 | 1 RNU6-826P     | --     |
| ENSG00000252637 | 3.724485 | -2.294189 | 1 | 1 RNA5SP268     | --     |
| ENSG00000252707 | 3.724485 | -2.294189 | 1 | 1 RNU11-2P      | --     |
| ENSG00000252839 | 3.724485 | -2.294189 | 1 | 1 RNU6-419P     | --     |
| ENSG00000252905 | 3.724485 | -2.294189 | 1 | 1 RNA5SP330     | --     |
| ENSG00000252908 | 3.724485 | -2.294189 | 1 | 1 RNU6-1003P    | --     |
| ENSG00000252914 | 3.724485 | -2.294189 | 1 | 1 RNU6-789P     | --     |
| ENSG00000252949 | 3.724485 | -2.294189 | 1 | 1 AL136303.1    | --     |
| ENSG00000252971 | 3.724485 | -2.294189 | 1 | 1 RNU6-1057P    | --     |
| ENSG00000252987 | 3.724485 | -2.294189 | 1 | 1 RNA5SP66      | --     |
| ENSG00000253140 | 3.724485 | -2.294189 | 1 | 1 RP11-567J20.3 | --     |
| ENSG00000253153 | 3.724485 | -2.294189 | 1 | 1 KB-1562D12.3  | K02896 |
| ENSG00000253180 | 3.724485 | -2.294189 | 1 | 1 RP11-410L14.1 | K10704 |
| ENSG00000253228 | 3.724485 | -2.294189 | 1 | 1 NRBF2P4       | --     |
| ENSG00000253295 | 3.724485 | -2.294189 | 1 | 1 RP11-779O18.1 | --     |
| ENSG00000253356 | 3.724485 | -2.294189 | 1 | 1 RP11-90P5.2   | --     |
| ENSG00000253397 | 3.724485 | -2.294189 | 1 | 1 RP11-597M17.1 | --     |
| ENSG00000253456 | 3.724485 | -2.294189 | 1 | 1 CTD-2363C16.2 | --     |
| ENSG00000253539 | 3.724485 | -2.294189 | 1 | 1 RP11-402L5.1  | --     |
| ENSG00000253582 | 3.724485 | -2.294189 | 1 | 1 RP11-649G15.2 | --     |
| ENSG00000253708 | 3.724485 | -2.294189 | 1 | 1 RP11-51J9.4   | --     |
| ENSG00000253739 | 3.724485 | -2.294189 | 1 | 1 RP11-90P5.7   | --     |
| ENSG00000253768 | 3.724485 | -2.294189 | 1 | 1 CTB-33O18.1   | --     |
| ENSG00000253802 | 3.724485 | -2.294189 | 1 | 1 CTA-392C11.1  | --     |
| ENSG00000253844 | 3.724485 | -2.294189 | 1 | 1 RP11-546K22.1 | --     |
| ENSG00000253911 | 3.724485 | -2.294189 | 1 | 1 KB-1205A7.2   | --     |
| ENSG00000253983 | 3.724485 | -2.294189 | 1 | 1 RP1-16A9.1    | --     |
| ENSG00000254038 | 3.724485 | -2.294189 | 1 | 1 RP11-419C23.1 | --     |
| ENSG00000254244 | 3.724485 | -2.294189 | 1 | 1 PAICSP4       | K01587 |
| ENSG00000254353 | 3.724485 | -2.294189 | 1 | 1 RP11-195E2.4  | --     |
| ENSG00000254362 | 3.724485 | -2.294189 | 1 | 1 RP11-14I17.3  | --     |
| ENSG00000254477 | 3.724485 | -2.294189 | 1 | 1 AP000640.10   | --     |
| ENSG00000254577 | 3.724485 | -2.294189 | 1 | 1 RP11-484D2.4  | --     |
| ENSG00000254648 | 3.724485 | -2.294189 | 1 | 1 RP11-713P17.4 | --     |
| ENSG00000254672 | 3.724485 | -2.294189 | 1 | 1 RP5-916O11.3  | K06632 |
| ENSG00000254747 | 3.724485 | -2.294189 | 1 | 1 RP11-664H7.1  | --     |
| ENSG00000254791 | 3.724485 | -2.294189 | 1 | 1 FAR1-IT1      | --     |
| ENSG00000254854 | 3.724485 | -2.294189 | 1 | 1 CTD-2523D13.2 | --     |
| ENSG00000254879 | 3.724485 | -2.294189 | 1 | 1 AC103828.1    | --     |
| ENSG00000254884 | 3.724485 | -2.294189 | 1 | 1 RP11-682B13.2 | --     |
| ENSG00000254973 | 3.724485 | -2.294189 | 1 | 1 RP11-429J17.7 | --     |
| ENSG00000254982 | 3.724485 | -2.294189 | 1 | 1 HMGB1P24      | K10802 |
| ENSG00000255115 | 3.724485 | -2.294189 | 1 | 1 RP11-91P24.3  | --     |
| ENSG00000255156 | 3.724485 | -2.294189 | 1 | 1 KLHL22-IT1    | --     |
| ENSG00000255186 | 3.724485 | -2.294189 | 1 | 1 RP11-514F3.5  | --     |



|                 |          |           |   |                  |        |
|-----------------|----------|-----------|---|------------------|--------|
| ENSG00000255250 | 3.724485 | -2.294189 | 1 | 1 CTD-2005H7.2   | --     |
| ENSG00000255272 | 3.724485 | -2.294189 | 1 | 1 RP11-646J21.6  | --     |
| ENSG00000255362 | 3.724485 | -2.294189 | 1 | 1 RP11-619A14.3  | --     |
| ENSG00000255382 | 3.724485 | -2.294189 | 1 | 1 RP11-718B12.2  | --     |
| ENSG00000255420 | 3.724485 | -2.294189 | 1 | 1 RP11-236J17.3  | --     |
| ENSG00000255434 | 3.724485 | -2.294189 | 1 | 1 CTD-2530H12.8  | --     |
| ENSG00000255670 | 3.724485 | -2.294189 | 1 | 1 RP11-253I19.3  | --     |
| ENSG00000255693 | 3.724485 | -2.294189 | 1 | 1 RP11-766N7.3   | --     |
| ENSG00000255776 | 3.724485 | -2.294189 | 1 | 1 RP11-436I9.3   | K15040 |
| ENSG00000255817 | 3.724485 | -2.294189 | 1 | 1 RP11-196H14.4  | --     |
| ENSG00000255967 | 3.724485 | -2.294189 | 1 | 1 RP11-438L7.3   | K07515 |
| ENSG00000256008 | 3.724485 | -2.294189 | 1 | 1 RP11-728G15.1  | --     |
| ENSG00000256011 | 3.724485 | -2.294189 | 1 | 1 RP11-392P7.7   | --     |
| ENSG00000256116 | 3.724485 | -2.294189 | 1 | 1 RP11-783K16.14 | --     |
| ENSG00000256139 | 3.724485 | -2.294189 | 1 | 1 RP11-968O1.5   | --     |
| ENSG00000256195 | 3.724485 | -2.294189 | 1 | 1 RP11-64D24.4   | --     |
| ENSG00000256299 | 3.724485 | -2.294189 | 1 | 1 RP11-989F5.3   | --     |
| ENSG00000256731 | 3.724485 | -2.294189 | 1 | 1 AL591069.1     | --     |
| ENSG00000256937 | 3.724485 | -2.294189 | 1 | 1 RP11-436I9.5   | K07604 |
| ENSG00000256981 | 3.724485 | -2.294189 | 1 | 1 TAS2R18        | K08474 |
| ENSG00000257241 | 3.724485 | -2.294189 | 1 | 1 RP11-611E13.3  | --     |
| ENSG00000257272 | 3.724485 | -2.294189 | 1 | 1 RP11-317N8.3   | --     |
| ENSG00000257289 | 3.724485 | -2.294189 | 1 | 1 RP11-611O2.6   | K04631 |
| ENSG00000257302 | 3.724485 | -2.294189 | 1 | 1 FAHD2P1        | --     |
| ENSG00000257384 | 3.724485 | -2.294189 | 1 | 1 RP11-644F5.12  | --     |
| ENSG00000257456 | 3.724485 | -2.294189 | 1 | 1 RP11-310I24.1  | --     |
| ENSG00000257474 | 3.724485 | -2.294189 | 1 | 1 RP11-359M6.1   | --     |
| ENSG00000257529 | 3.724485 | -2.294189 | 1 | 1 RPL36A-HNRNPH2 | K12898 |
| ENSG00000257803 | 3.724485 | -2.294189 | 1 | 1 RP11-575G13.2  | K03857 |
| ENSG00000257894 | 3.724485 | -2.294189 | 1 | 1 RP1-78O14.1    | --     |
| ENSG00000257947 | 3.724485 | -2.294189 | 1 | 1 RP11-46I1.1    | --     |
| ENSG00000257999 | 3.724485 | -2.294189 | 1 | 1 RP11-61E11.2   | --     |
| ENSG00000258177 | 3.724485 | -2.294189 | 1 | 1 RP11-394J1.2   | --     |
| ENSG00000258205 | 3.724485 | -2.294189 | 1 | 1 RP11-248E9.1   | --     |
| ENSG00000258240 | 3.724485 | -2.294189 | 1 | 1 RP1-46F2.3     | --     |
| ENSG00000258380 | 3.724485 | -2.294189 | 1 | 1 RP11-33N16.2   | --     |
| ENSG00000258425 | 3.724485 | -2.294189 | 1 | 1 CTD-2207P18.1  | --     |
| ENSG00000258428 | 3.724485 | -2.294189 | 1 | 1 RP11-1085N6.2  | --     |
| ENSG00000258553 | 3.724485 | -2.294189 | 1 | 1 RP11-16B13.1   | --     |
| ENSG00000258571 | 3.724485 | -2.294189 | 1 | 1 PTTG4P         | K06635 |
| ENSG00000258615 | 3.724485 | -2.294189 | 1 | 1 RP11-725G5.3   | --     |
| ENSG00000258632 | 3.724485 | -2.294189 | 1 | 1 RP11-354B3.1   | K02898 |
| ENSG00000258679 | 3.724485 | -2.294189 | 1 | 1 RP11-74M13.4   | K16197 |
| ENSG00000258717 | 3.724485 | -2.294189 | 1 | 1 RP11-566J3.2   | --     |
| ENSG00000258789 | 3.724485 | -2.294189 | 1 | 1 RP11-507K2.3   | --     |
| ENSG00000258815 | 3.724485 | -2.294189 | 1 | 1 RP11-408B11.2  | --     |
| ENSG00000258823 | 3.724485 | -2.294189 | 1 | 1 CTD-2555K7.3   | --     |
| ENSG00000258845 | 3.724485 | -2.294189 | 1 | 1 RP11-945F5.1   | --     |
| ENSG00000258917 | 3.724485 | -2.294189 | 1 | 1 ZMYND19P1      | --     |
| ENSG00000259002 | 3.724485 | -2.294189 | 1 | 1 RP11-671J11.7  | --     |
| ENSG00000259078 | 3.724485 | -2.294189 | 1 | 1 PTBP1P         | K13218 |
| ENSG00000259215 | 3.724485 | -2.294189 | 1 | 1 RP11-253M7.4   | --     |
| ENSG00000259232 | 3.724485 | -2.294189 | 1 | 1 RP11-349G13.1  | K13202 |
| ENSG00000259268 | 3.724485 | -2.294189 | 1 | 1 AC007950.1     | --     |
| ENSG00000259335 | 3.724485 | -2.294189 | 1 | 1 HNRNPMP1       | K12887 |
| ENSG00000259351 | 3.724485 | -2.294189 | 1 | 1 RP11-111E14.1  | --     |
| ENSG00000259378 | 3.724485 | -2.294189 | 1 | 1 DCAF13P3       | K11806 |
| ENSG00000259405 | 3.724485 | -2.294189 | 1 | 1 ISCA1P4        | K13628 |

|                 |          |           |   |                 |        |
|-----------------|----------|-----------|---|-----------------|--------|
| ENSG00000259410 | 3.724485 | -2.294189 | 1 | 1 RP11-34F13.3  | -      |
| ENSG00000259411 | 3.724485 | -2.294189 | 1 | 1 HNRNPA1P45    | K12741 |
| ENSG00000259414 | 3.724485 | -2.294189 | 1 | 1 HERC2P7       | K10595 |
| ENSG00000259429 | 3.724485 | -2.294189 | 1 | 1 UBE2Q2P3      | K10582 |
| ENSG00000259473 | 3.724485 | -2.294189 | 1 | 1 RP11-96C21.1  | -      |
| ENSG00000259474 | 3.724485 | -2.294189 | 1 | 1 RP11-650L12.1 | -      |
| ENSG00000259504 | 3.724485 | -2.294189 | 1 | 1 RP11-352D13.5 | -      |
| ENSG00000259536 | 3.724485 | -2.294189 | 1 | 1 RP11-111A22.1 | -      |
| ENSG00000259563 | 3.724485 | -2.294189 | 1 | 1 CTD-2329K10.1 | -      |
| ENSG00000259570 | 3.724485 | -2.294189 | 1 | 1 RP11-671M22.4 | -      |
| ENSG00000259645 | 3.724485 | -2.294189 | 1 | 1 RP11-253M7.6  | -      |
| ENSG00000259730 | 3.724485 | -2.294189 | 1 | 1 CTD-2007H18.1 | -      |
| ENSG00000259735 | 3.724485 | -2.294189 | 1 | 1 RP11-356M20.3 | -      |
| ENSG00000259754 | 3.724485 | -2.294189 | 1 | 1 RP11-208K4.1  | -      |
| ENSG00000259876 | 3.724485 | -2.294189 | 1 | 1 CTD-3037G24.4 | -      |
| ENSG00000259924 | 3.724485 | -2.294189 | 1 | 1 RP11-16E23.4  | K09520 |
| ENSG00000259928 | 3.724485 | -2.294189 | 1 | 1 RP11-218M11.1 | -      |
| ENSG00000259964 | 3.724485 | -2.294189 | 1 | 1 RP11-673C5.2  | -      |
| ENSG00000260013 | 3.724485 | -2.294189 | 1 | 1 APOOP5        | -      |
| ENSG00000260038 | 3.724485 | -2.294189 | 1 | 1 RP11-407G23.4 | -      |
| ENSG00000260047 | 3.724485 | -2.294189 | 1 | 1 RP11-989E6.2  | K14009 |
| ENSG00000260185 | 3.724485 | -2.294189 | 1 | 1 RP11-432I5.6  | -      |
| ENSG00000260239 | 3.724485 | -2.294189 | 1 | 1 RP11-274H24.1 | -      |
| ENSG00000260347 | 3.724485 | -2.294189 | 1 | 1 MOCS1P1       | K03639 |
| ENSG00000260369 | 3.724485 | -2.294189 | 1 | 1 CTD-2526A2.2  | -      |
| ENSG00000260488 | 3.724485 | -2.294189 | 1 | 1 RP11-166B2.7  | -      |
| ENSG00000260602 | 3.724485 | -2.294189 | 1 | 1 HMG2N2P40     | K11300 |
| ENSG00000260619 | 3.724485 | -2.294189 | 1 | 1 RP11-775C24.3 | -      |
| ENSG00000260631 | 3.724485 | -2.294189 | 1 | 1 RBM22P12      | K12872 |
| ENSG00000260657 | 3.724485 | -2.294189 | 1 | 1 RP11-315D16.4 | -      |
| ENSG00000260685 | 3.724485 | -2.294189 | 1 | 1 RP11-326L17.1 | -      |
| ENSG00000260738 | 3.724485 | -2.294189 | 1 | 1 LINC00554     | -      |
| ENSG00000260776 | 3.724485 | -2.294189 | 1 | 1 RP11-114H24.2 | K10595 |
| ENSG00000260865 | 3.724485 | -2.294189 | 1 | 1 CTA-331F8.1   | -      |
| ENSG00000260870 | 3.724485 | -2.294189 | 1 | 1 RP11-358M11.4 | K03966 |
| ENSG00000260895 | 3.724485 | -2.294189 | 1 | 1 RP11-554A11.7 | -      |
| ENSG00000260903 | 3.724485 | -2.294189 | 1 | 1 XKR7          | -      |
| ENSG00000260971 | 3.724485 | -2.294189 | 1 | 1 RP11-504A18.1 | -      |
| ENSG00000261024 | 3.724485 | -2.294189 | 1 | 1 GS1-279B7.1   | -      |
| ENSG00000261044 | 3.724485 | -2.294189 | 1 | 1 AP006547.3    | -      |
| ENSG00000261092 | 3.724485 | -2.294189 | 1 | 1 RP11-21B23.2  | -      |
| ENSG00000261096 | 3.724485 | -2.294189 | 1 | 1 RP11-690I21.2 | -      |
| ENSG00000261124 | 3.724485 | -2.294189 | 1 | 1 AC135050.5    | -      |
| ENSG00000261131 | 3.724485 | -2.294189 | 1 | 1 RP11-93O14.2  | -      |
| ENSG00000261186 | 3.724485 | -2.294189 | 1 | 1 RP11-341N2.1  | -      |
| ENSG00000261242 | 3.724485 | -2.294189 | 1 | 1 CTD-2302E22.4 | -      |
| ENSG00000261320 | 3.724485 | -2.294189 | 1 | 1 RP11-297D21.2 | -      |
| ENSG00000261341 | 3.724485 | -2.294189 | 1 | 1 CTD-2568A17.1 | -      |
| ENSG00000261407 | 3.724485 | -2.294189 | 1 | 1 RP11-326A19.3 | -      |
| ENSG00000261433 | 3.724485 | -2.294189 | 1 | 1 CTC-297N7.1   | -      |
| ENSG00000261439 | 3.724485 | -2.294189 | 1 | 1 CTD-2050B12.2 | -      |
| ENSG00000261512 | 3.724485 | -2.294189 | 1 | 1 RP11-46D6.1   | -      |
| ENSG00000261524 | 3.724485 | -2.294189 | 1 | 1 ABCB10P3      | K05657 |
| ENSG00000261620 | 3.724485 | -2.294189 | 1 | 1 HMG2N2P41     | K11300 |
| ENSG00000261644 | 3.724485 | -2.294189 | 1 | 1 RP11-327F22.2 | -      |
| ENSG00000261656 | 3.724485 | -2.294189 | 1 | 1 CTD-2258A20.5 | -      |
| ENSG00000261687 | 3.724485 | -2.294189 | 1 | 1 RP11-473C18.3 | -      |
| ENSG00000261774 | 3.724485 | -2.294189 | 1 | 1 RP11-328J14.2 | -      |

|                 |          |           |   |                 |        |
|-----------------|----------|-----------|---|-----------------|--------|
| ENSG00000261790 | 3.724485 | -2.294189 | 1 | 1 AC005606.14   | --     |
| ENSG00000261803 | 3.724485 | -2.294189 | 1 | 1 RP11-434E6.2  | --     |
| ENSG00000261925 | 3.724485 | -2.294189 | 1 | 1 RP11-388M20.9 | --     |
| ENSG00000261959 | 3.724485 | -2.294189 | 1 | 1 RP11-893F2.14 | --     |
| ENSG00000261963 | 3.724485 | -2.294189 | 1 | 1 RP11-74E22.4  | K16452 |
| ENSG00000262133 | 3.724485 | -2.294189 | 1 | 1 RP11-676J12.6 | --     |
| ENSG00000262155 | 3.724485 | -2.294189 | 1 | 1 RP11-266L9.5  | --     |
| ENSG00000262179 | 3.724485 | -2.294189 | 1 | 1 RP1-302G2.5   | --     |
| ENSG00000262370 | 3.724485 | -2.294189 | 1 | 1 RP11-473M20.9 | --     |
| ENSG00000262480 | 3.724485 | -2.294189 | 1 | 1 SAMD11P1      | --     |
| ENSG00000262514 | 3.724485 | -2.294189 | 1 | 1 RP11-96D1.9   | --     |
| ENSG00000262662 | 3.724485 | -2.294189 | 1 | 1 CTD-2561B21.3 | --     |
| ENSG00000262759 | 3.724485 | -2.294189 | 1 | 1 MRPS21P9      | --     |
| ENSG00000262870 | 3.724485 | -2.294189 | 1 | 1 CYCSP40       | --     |
| ENSG00000262874 | 3.724485 | -2.294189 | 1 | 1 C19orf84      | --     |
| ENSG00000262905 | 3.724485 | -2.294189 | 1 | 1 RP5-1029F21.2 | --     |
| ENSG00000262943 | 3.724485 | -2.294189 | 1 | 1 ALOX12P2      | K00458 |
| ENSG00000262983 | 3.724485 | -2.294189 | 1 | 1 AF001550.7    | --     |
| ENSG00000263017 | 3.724485 | -2.294189 | 1 | 1 RP11-356I18.1 | --     |
| ENSG00000263164 | 3.724485 | -2.294189 | 1 | 1 RP11-333E1.2  | --     |
| ENSG00000263279 | 3.724485 | -2.294189 | 1 | 1 RP11-109M19.1 | --     |
| ENSG00000263338 | 3.724485 | -2.294189 | 1 | 1 RP11-235E17.3 | --     |
| ENSG00000263383 | 3.724485 | -2.294189 | 1 | 1 AC005549.1    | --     |
| ENSG00000263389 | 3.724485 | -2.294189 | 1 | 1 MIR3973       | --     |
| ENSG00000263466 | 3.724485 | -2.294189 | 1 | 1 RP1-56K13.2   | --     |
| ENSG00000263584 | 3.724485 | -2.294189 | 1 | 1 MIR4480       | --     |
| ENSG00000263607 | 3.724485 | -2.294189 | 1 | 1 RN7SL80P      | --     |
| ENSG00000263648 | 3.724485 | -2.294189 | 1 | 1 RP11-471L13.3 | K10420 |
| ENSG00000263762 | 3.724485 | -2.294189 | 1 | 1 MIR4286       | --     |
| ENSG00000263887 | 3.724485 | -2.294189 | 1 | 1 RP11-51L5.5   | K11837 |
| ENSG00000263913 | 3.724485 | -2.294189 | 1 | 1 AC004812.1    | --     |
| ENSG00000263975 | 3.724485 | -2.294189 | 1 | 1 CTB-58E17.9   | --     |
| ENSG00000263995 | 3.724485 | -2.294189 | 1 | 1 AC011499.1    | --     |
| ENSG00000264017 | 3.724485 | -2.294189 | 1 | 1 RN7SL336P     | --     |
| ENSG00000264127 | 3.724485 | -2.294189 | 1 | 1 SCML2P1       | --     |
| ENSG00000264213 | 3.724485 | -2.294189 | 1 | 1 RN7SL324P     | --     |
| ENSG00000264216 | 3.724485 | -2.294189 | 1 | 1 NOS2P1        | K13241 |
| ENSG00000264224 | 3.724485 | -2.294189 | 1 | 1 AC004655.1    | --     |
| ENSG00000264256 | 3.724485 | -2.294189 | 1 | 1 AC025166.1    | --     |
| ENSG00000264308 | 3.724485 | -2.294189 | 1 | 1 AL121897.1    | --     |
| ENSG00000264317 | 3.724485 | -2.294189 | 1 | 1 RN7SL154P     | --     |
| ENSG00000264408 | 3.724485 | -2.294189 | 1 | 1 MIR4470       | --     |
| ENSG00000264627 | 3.724485 | -2.294189 | 1 | 1 RN7SL820P     | --     |
| ENSG00000264735 | 3.724485 | -2.294189 | 1 | 1 RP11-498C9.17 | --     |
| ENSG00000264843 | 3.724485 | -2.294189 | 1 | 1 RP11-856M7.2  | --     |
| ENSG00000264853 | 3.724485 | -2.294189 | 1 | 1 RP11-16C1.2   | --     |
| ENSG00000264895 | 3.724485 | -2.294189 | 1 | 1 RP11-421E14.2 | --     |
| ENSG00000264947 | 3.724485 | -2.294189 | 1 | 1 hsa-mir-3181  | --     |
| ENSG00000264994 | 3.724485 | -2.294189 | 1 | 1 SNORD92       | --     |
| ENSG00000265068 | 3.724485 | -2.294189 | 1 | 1 AL591377.1    | --     |
| ENSG00000265089 | 3.724485 | -2.294189 | 1 | 1 MIR4655       | --     |
| ENSG00000265218 | 3.724485 | -2.294189 | 1 | 1 RP11-927P21.1 | --     |
| ENSG00000265261 | 3.724485 | -2.294189 | 1 | 1 RP11-162A12.3 | K14288 |
| ENSG00000265289 | 3.724485 | -2.294189 | 1 | 1 AC104984.4    | --     |
| ENSG00000265314 | 3.724485 | -2.294189 | 1 | 1 MIR548AH      | --     |
| ENSG00000265342 | 3.724485 | -2.294189 | 1 | 1 RP11-16C1.1   | --     |
| ENSG00000265445 | 3.724485 | -2.294189 | 1 | 1 RP11-849N15.1 | --     |
| ENSG00000265450 | 3.724485 | -2.294189 | 1 | 1 MIR4502       | --     |

|                 |          |           |   |                  |        |
|-----------------|----------|-----------|---|------------------|--------|
| ENSG00000265462 | 3.724485 | -2.294189 | 1 | 1 MIR3680-1      | --     |
| ENSG00000265496 | 3.724485 | -2.294189 | 1 | 1 MIR1539        | --     |
| ENSG00000265648 | 3.724485 | -2.294189 | 1 | 1 RN7SL279P      | --     |
| ENSG00000265654 | 3.724485 | -2.294189 | 1 | 1 AL513547.1     | --     |
| ENSG00000265660 | 3.724485 | -2.294189 | 1 | 1 MIR4664        | --     |
| ENSG00000265713 | 3.724485 | -2.294189 | 1 | 1 RP11-82O19.2   | --     |
| ENSG00000265715 | 3.724485 | -2.294189 | 1 | 1 MIR3118-1      | --     |
| ENSG00000265798 | 3.724485 | -2.294189 | 1 | 1 RP11-271K11.5  | --     |
| ENSG00000265820 | 3.724485 | -2.294189 | 1 | 1 MIR3177        | --     |
| ENSG00000265907 | 3.724485 | -2.294189 | 1 | 1 RP11-737O24.2  | --     |
| ENSG00000265908 | 3.724485 | -2.294189 | 1 | 1 RP11-20B24.6   | --     |
| ENSG00000265939 | 3.724485 | -2.294189 | 1 | 1 UBE2CP2        | --     |
| ENSG00000265944 | 3.724485 | -2.294189 | 1 | 1 C18orf64       | --     |
| ENSG00000265948 | 3.724485 | -2.294189 | 1 | 1 RP11-296E23.2  | --     |
| ENSG00000266017 | 3.724485 | -2.294189 | 1 | 1 MIR4477A       | --     |
| ENSG00000266097 | 3.724485 | -2.294189 | 1 | 1 MIR5192        | --     |
| ENSG00000266155 | 3.724485 | -2.294189 | 1 | 1 RP11-927P21.6  | --     |
| ENSG00000266315 | 3.724485 | -2.294189 | 1 | 1 MIR4668        | --     |
| ENSG00000266465 | 3.724485 | -2.294189 | 1 | 1 AC025165.1     | --     |
| ENSG00000266467 | 3.724485 | -2.294189 | 1 | 1 RN7SL220P      | --     |
| ENSG00000266538 | 3.724485 | -2.294189 | 1 | 1 RP11-385D13.3  | --     |
| ENSG00000266654 | 3.724485 | -2.294189 | 1 | 1 RP11-1376P16.1 | --     |
| ENSG00000266657 | 3.724485 | -2.294189 | 1 | 1 AL583842.3     | --     |
| ENSG00000266728 | 3.724485 | -2.294189 | 1 | 1 AC015688.3     | K10093 |
| ENSG00000266783 | 3.724485 | -2.294189 | 1 | 1 RP11-715F3.2   | --     |
| ENSG00000266801 | 3.724485 | -2.294189 | 1 | 1 RP11-521L9.2   | --     |
| ENSG00000266832 | 3.724485 | -2.294189 | 1 | 1 AL445464.1     | --     |
| ENSG00000266895 | 3.724485 | -2.294189 | 1 | 1 CTC-268N12.2   | --     |
| ENSG00000266897 | 3.724485 | -2.294189 | 1 | 1 AC005546.2     | --     |
| ENSG00000266913 | 3.724485 | -2.294189 | 1 | 1 CTC-548K16.2   | --     |
| ENSG00000266953 | 3.724485 | -2.294189 | 1 | 1 RP11-618P17.4  | K14801 |
| ENSG00000266957 | 3.724485 | -2.294189 | 1 | 1 RP11-49K24.4   | --     |
| ENSG00000266959 | 3.724485 | -2.294189 | 1 | 1 AC005786.3     | K02993 |
| ENSG00000266990 | 3.724485 | -2.294189 | 1 | 1 AC004528.4     | --     |
| ENSG00000267006 | 3.724485 | -2.294189 | 1 | 1 CTC-448F2.4    | --     |
| ENSG00000267009 | 3.724485 | -2.294189 | 1 | 1 RP11-120M18.2  | --     |
| ENSG00000267011 | 3.724485 | -2.294189 | 1 | 1 CTB-50L17.16   | --     |
| ENSG00000267025 | 3.724485 | -2.294189 | 1 | 1 AC015849.19    | --     |
| ENSG00000267051 | 3.724485 | -2.294189 | 1 | 1 RP11-128P17.2  | --     |
| ENSG00000267052 | 3.724485 | -2.294189 | 1 | 1 CTB-30L5.1     | --     |
| ENSG00000267069 | 3.724485 | -2.294189 | 1 | 1 RP11-64C12.8   | --     |
| ENSG00000267078 | 3.724485 | -2.294189 | 1 | 1 RP11-666A8.9   | --     |
| ENSG00000267122 | 3.724485 | -2.294189 | 1 | 1 AC004490.1     | --     |
| ENSG00000267127 | 3.724485 | -2.294189 | 1 | 1 RP11-795F19.5  | --     |
| ENSG00000267179 | 3.724485 | -2.294189 | 1 | 1 ZNF763         | K09228 |
| ENSG00000267218 | 3.724485 | -2.294189 | 1 | 1 AC005336.5     | K10908 |
| ENSG00000267274 | 3.724485 | -2.294189 | 1 | 1 CTD-2006C1.12  | --     |
| ENSG00000267296 | 3.724485 | -2.294189 | 1 | 1 CEBPA-AS1      | --     |
| ENSG00000267319 | 3.724485 | -2.294189 | 1 | 1 CTD-2528L19.3  | K09228 |
| ENSG00000267322 | 3.724485 | -2.294189 | 1 | 1 SCARNA17       | --     |
| ENSG00000267334 | 3.724485 | -2.294189 | 1 | 1 CTD-2534I21.8  | --     |
| ENSG00000267346 | 3.724485 | -2.294189 | 1 | 1 EIF5AP3        | K03263 |
| ENSG00000267405 | 3.724485 | -2.294189 | 1 | 1 CTC-296K1.4    | --     |
| ENSG00000267406 | 3.724485 | -2.294189 | 1 | 1 CTD-2189E23.2  | --     |
| ENSG00000267455 | 3.724485 | -2.294189 | 1 | 1 RP11-78A19.2   | --     |
| ENSG00000267491 | 3.724485 | -2.294189 | 1 | 1 CTD-2373H9.5   | --     |
| ENSG00000267504 | 3.724485 | -2.294189 | 1 | 1 RP11-845C23.2  | --     |
| ENSG00000267539 | 3.724485 | -2.294189 | 1 | 1 RP11-138H8.7   | --     |

|                 |          |           |   |                 |        |
|-----------------|----------|-----------|---|-----------------|--------|
| ENSG00000267545 | 3.724485 | -2.294189 | 1 | 1 AC005779.2    | -      |
| ENSG00000267583 | 3.724485 | -2.294189 | 1 | 1 RP11-322E11.5 | -      |
| ENSG00000267587 | 3.724485 | -2.294189 | 1 | 1 RP11-687F6.4  | K00384 |
| ENSG00000267620 | 3.724485 | -2.294189 | 1 | 1 RP11-795H16.2 | K03141 |
| ENSG00000267703 | 3.724485 | -2.294189 | 1 | 1 CTD-2013N17.4 | -      |
| ENSG00000267735 | 3.724485 | -2.294189 | 1 | 1 CTD-2265O21.7 | -      |
| ENSG00000267786 | 3.724485 | -2.294189 | 1 | 1 AF038458.3    | -      |
| ENSG00000267788 | 3.724485 | -2.294189 | 1 | 1 CTD-2534I21.9 | -      |
| ENSG00000267889 | 3.724485 | -2.294189 | 1 | 1 AC079354.2    | -      |
| ENSG00000267892 | 3.724485 | -2.294189 | 1 | 1 CTD-2540F13.2 | -      |
| ENSG00000268041 | 3.724485 | -2.294189 | 1 | 1 CTD-2575K13.6 | K09434 |
| ENSG00000268049 | 3.724485 | -2.294189 | 1 | 1 CTD-2619J13.9 | -      |
| ENSG00000268157 | 3.724485 | -2.294189 | 1 | 1 AC010524.4    | -      |
| ENSG00000268175 | 3.724485 | -2.294189 | 1 | 1 AC117395.1    | -      |
| ENSG00000268230 | 3.724485 | -2.294189 | 1 | 1 CTD-2619J13.8 | -      |
| ENSG00000268397 | 3.724485 | -2.294189 | 1 | 1 AC008443.1    | K12025 |
| ENSG00000268400 | 3.724485 | -2.294189 | 1 | 1 CTD-3214H19.4 | K15300 |
| ENSG00000268401 | 3.724485 | -2.294189 | 1 | 1 CTC-344H19.4  | -      |
| ENSG00000268434 | 3.724485 | -2.294189 | 1 | 1 AC011530.4    | K08788 |
| ENSG00000268510 | 3.724485 | -2.294189 | 1 | 1 IFNL3P1       | K05447 |
| ENSG00000268530 | 3.724485 | -2.294189 | 1 | 1 CTC-273B12.5  | -      |
| ENSG00000268688 | 3.724485 | -2.294189 | 1 | 1 AC007382.1    | -      |
| ENSG00000268743 | 3.724485 | -2.294189 | 1 | 1 CTD-2538G9.5  | -      |
| ENSG00000268746 | 3.724485 | -2.294189 | 1 | 1 CTD-2571L23.8 | -      |
| ENSG00000268747 | 3.724485 | -2.294189 | 1 | 1 CTD-3030D20.1 | K18182 |
| ENSG00000268791 | 3.724485 | -2.294189 | 1 | 1 AC093323.1    | -      |
| ENSG00000268805 | 3.724485 | -2.294189 | 1 | 1 PRED57        | -      |
| ENSG00000268846 | 3.724485 | -2.294189 | 1 | 1 AC018867.2    | -      |
| ENSG00000268849 | 3.724485 | -2.294189 | 1 | 1 SIGLEC22P     | K06473 |
| ENSG00000268965 | 3.724485 | -2.294189 | 1 | 1 AC061992.1    | K10408 |
| ENSG00000269068 | 3.724485 | -2.294189 | 1 | 1 RP11-256I23.2 | -      |
| ENSG00000269102 | 3.724485 | -2.294189 | 1 | 1 CTD-2525I3.5  | -      |
| ENSG00000269282 | 3.724485 | -2.294189 | 1 | 1 AC024257.1    | -      |
| ENSG00000269321 | 3.724485 | -2.294189 | 1 | 1 CTC-453G23.4  | -      |
| ENSG00000269425 | 3.724485 | -2.294189 | 1 | 1 AC007292.7    | -      |
| ENSG00000269584 | 3.724485 | -2.294189 | 1 | 1 TDGF1P7       | -      |
| ENSG00000269600 | 3.724485 | -2.294189 | 1 | 1 AC016629.3    | -      |
| ENSG00000269895 | 3.724485 | -2.294189 | 1 | 1 AP000654.4    | -      |
| ENSG00000269898 | 3.724485 | -2.294189 | 1 | 1 RP11-568J23.4 | -      |
| ENSG00000269955 | 3.724485 | -2.294189 | 1 | 1 LUC7L2        | K13212 |
| ENSG00000269962 | 3.724485 | -2.294189 | 1 | 1 RP13-238F13.5 | -      |
| ENSG00000270016 | 3.724485 | -2.294189 | 1 | 1 RP11-932O9.8  | -      |
| ENSG00000270031 | 3.724485 | -2.294189 | 1 | 1 RP3-426I6.6   | -      |
| ENSG00000270040 | 3.724485 | -2.294189 | 1 | 1 RP11-416A14.1 | -      |
| ENSG00000270071 | 3.724485 | -2.294189 | 1 | 1 AP001172.2    | -      |
| ENSG00000270115 | 3.724485 | -2.294189 | 1 | 1 RP11-415J8.7  | -      |
| ENSG00000270116 | 3.724485 | -2.294189 | 1 | 1 AP001429.1    | -      |
| ENSG00000270124 | 3.724485 | -2.294189 | 1 | 1 RP11-118F19.1 | -      |
| ENSG00000270136 | 3.724485 | -2.294189 | 1 | 1 MINOS1-NBL1   | K19558 |
| ENSG00000270257 | 3.724485 | -2.294189 | 1 | 1 RP11-17P16.2  | -      |
| ENSG00000270296 | 3.724485 | -2.294189 | 1 | 1 RP11-59H1.4   | K08501 |
| ENSG00000270314 | 3.724485 | -2.294189 | 1 | 1 GS1-165B14.2  | -      |
| ENSG00000270322 | 3.724485 | -2.294189 | 1 | 1 RP11-697E2.10 | K11644 |
| ENSG00000270409 | 3.724485 | -2.294189 | 1 | 1 RP11-44D5.1   | -      |
| ENSG00000270638 | 3.724485 | -2.294189 | 1 | 1 RP3-466P17.1  | -      |
| ENSG00000270697 | 3.724485 | -2.294189 | 1 | 1 RP11-381K20.4 | -      |
| ENSG00000270755 | 3.724485 | -2.294189 | 1 | 1 RP11-138E2.1  | -      |
| ENSG00000270775 | 3.724485 | -2.294189 | 1 | 1 AP000436.4    | K03231 |

|                  |          |           |   |                   |        |
|------------------|----------|-----------|---|-------------------|--------|
| ENSG00000270823  | 3.724485 | -2.294189 | 1 | 1 hsa-mir-335     | -      |
| ENSG00000270846  | 3.724485 | -2.294189 | 1 | 1 RP11-674I16.1   | -      |
| ENSG00000270857  | 3.724485 | -2.294189 | 1 | 1 RP11-757G14.3   | K10704 |
| ENSG00000270937  | 3.724485 | -2.294189 | 1 | 1 RP5-856G1.1     | -      |
| ENSG00000270948  | 3.724485 | -2.294189 | 1 | 1 RP11-460N20.7   | -      |
| ENSG00000271100  | 3.724485 | -2.294189 | 1 | 1 RP11-697H9.5    | K02147 |
| ENSG00000271199  | 3.724485 | -2.294189 | 1 | 1 RP13-216E22.5   | -      |
| ENSG00000271228  | 3.724485 | -2.294189 | 1 | 1 CTC-336P14.1    | -      |
| ENSG00000271236  | 3.724485 | -2.294189 | 1 | 1 SUMO2P15        | K12160 |
| ENSG00000271252  | 3.724485 | -2.294189 | 1 | 1 RP11-286B14.2   | -      |
| ENSG00000271314  | 3.724485 | -2.294189 | 1 | 1 RP11-435O5.6    | -      |
| ENSG00000271370  | 3.724485 | -2.294189 | 1 | 1 RP11-253I19.4   | K12399 |
| ENSG00000271410  | 3.724485 | -2.294189 | 1 | 1 RP11-506H20.2   | K08808 |
| ENSG00000271437  | 3.724485 | -2.294189 | 1 | 1 RP11-295B17.6   | K15413 |
| ENSG00000271484  | 3.724485 | -2.294189 | 1 | 1 RP11-132J14.3   | -      |
| ENSG00000271511  | 3.724485 | -2.294189 | 1 | 1 RP11-712C19.1   | K17772 |
| ENSG00000271554  | 3.724485 | -2.294189 | 1 | 1 RP4-665N4.8     | -      |
| ENSG00000271586  | 3.724485 | -2.294189 | 1 | 1 RP11-52M17.1    | -      |
| ENSG00000271607  | 3.724485 | -2.294189 | 1 | 1 RP3-418A9.3     | -      |
| ENSG00000271635  | 3.724485 | -2.294189 | 1 | 1 RP11-68E19.1    | K06629 |
| ENSG00000271647  | 3.724485 | -2.294189 | 1 | 1 KRT8P47         | K07605 |
| ENSG00000271730  | 3.724485 | -2.294189 | 1 | 1 RP11-787I22.3   | -      |
| ENSG00000271732  | 3.724485 | -2.294189 | 1 | 1 RP5-1182A14.5   | -      |
| ENSG00000271761  | 3.724485 | -2.294189 | 1 | 1 XXbac-BPGBPG55C | -      |
| ENSG00000271835  | 3.724485 | -2.294189 | 1 | 1 RP11-129K12.4   | -      |
| ENSG00000271868  | 3.724485 | -2.294189 | 1 | 1 RP11-1293J14.1  | -      |
| ENSG00000272109  | 3.724485 | -2.294189 | 1 | 1 CTD-2260A17.3   | -      |
| ENSG00000272181  | 3.724485 | -2.294189 | 1 | 1 RP11-245J9.6    | -      |
| ENSG00000272211  | 3.724485 | -2.294189 | 1 | 1 RP11-347P5.1    | -      |
| ENSG00000272265  | 3.724485 | -2.294189 | 1 | 1 CTD-2287O16.4   | -      |
| ENSG00000272283  | 3.724485 | -2.294189 | 1 | 1 Metazoa_SRP     | -      |
| ENSG00000272324  | 3.724485 | -2.294189 | 1 | 1 CTD-2154B17.4   | -      |
| ENSG00000272381  | 3.724485 | -2.294189 | 1 | 1 RP11-192P3.4    | -      |
| ENSG00000272735  | 3.724485 | -2.294189 | 1 | 1 RP11-467P9.1    | -      |
| ENSG00000272950  | 3.724485 | -2.294189 | 1 | 1 RP11-307C18.1   | -      |
| ENSG00000272963  | 3.724485 | -2.294189 | 1 | 1 OR7A19P         | K04257 |
| ENSG00000273003  | 3.724485 | -2.294189 | 1 | 1 RP11-399J13.3   | K17927 |
| ENSG00000273090  | 3.724485 | -2.294189 | 1 | 1 RP11-78I14.1    | -      |
| ENSG00000273196  | 3.724485 | -2.294189 | 1 | 1 RP11-717A5.2    | -      |
| ENSG00000273287  | 3.724485 | -2.294189 | 1 | 1 CTA-268H5.14    | -      |
| ENSG00000273308  | 3.724485 | -2.294189 | 1 | 1 RP11-496H1.2    | -      |
| ENSG00000273328  | 3.724485 | -2.294189 | 1 | 1 RP11-141M3.5    | -      |
| ENSG00000273428  | 3.724485 | -2.294189 | 1 | 1 RP4-539M6.22    | -      |
| ENSG00000273444  | 3.724485 | -2.294189 | 1 | 1 RP5-1147A1.2    | K01265 |
| ENSG00000273464  | 3.724485 | -2.294189 | 1 | 1 RP11-313P22.1   | -      |
| ENSG00000273476  | 3.724485 | -2.294189 | 1 | 1 RP11-108L7.14   | -      |
| ENSG00000001626  | -3.68859 | -2.060656 | 1 | 1 CFTR            | -      |
| ENSG000000006210 | -3.68859 | -2.060656 | 1 | 1 CX3CL1          | K05508 |
| ENSG000000010932 | -3.68859 | -2.060656 | 1 | 1 FMO1            | K00485 |
| ENSG000000015413 | -3.68859 | -2.060656 | 1 | 1 DPEP1           | K01273 |
| ENSG000000017483 | -3.68859 | -2.060656 | 1 | 1 SLC38A5         | K14992 |
| ENSG000000048540 | -3.68859 | -2.060656 | 1 | 1 LMO3            | -      |
| ENSG000000054219 | -3.68859 | -2.060656 | 1 | 1 LY75            | K06559 |
| ENSG000000064225 | -3.68859 | -2.060656 | 1 | 1 ST3GAL6         | K03792 |
| ENSG000000068354 | -3.68859 | -2.060656 | 1 | 1 TBC1D25         | -      |
| ENSG000000068781 | -3.68859 | -2.060656 | 1 | 1 STON1-GTF2A1L   | K03122 |
| ENSG000000069206 | -3.68859 | -2.060656 | 1 | 1 ADAM7           | K16071 |
| ENSG000000077327 | -3.68859 | -2.060656 | 1 | 1 SPAG6           | -      |

|                 |          |           |   |            |        |
|-----------------|----------|-----------|---|------------|--------|
| ENSG00000077522 | -3.68859 | -2.060656 | 1 | 1 ACTN2    | K05699 |
| ENSG00000078589 | -3.68859 | -2.060656 | 1 | 1 P2RY10   | K04274 |
| ENSG00000079974 | -3.68859 | -2.060656 | 1 | 1 RABL2B   | K07931 |
| ENSG00000081237 | -3.68859 | -2.060656 | 1 | 1 PTPRC    | K06478 |
| ENSG00000091482 | -3.68859 | -2.060656 | 1 | 1 SMPX     | -      |
| ENSG00000091513 | -3.68859 | -2.060656 | 1 | 1 TF       | K14736 |
| ENSG00000100473 | -3.68859 | -2.060656 | 1 | 1 COCH     | -      |
| ENSG00000100678 | -3.68859 | -2.060656 | 1 | 1 SLC8A3   | K05849 |
| ENSG00000101278 | -3.68859 | -2.060656 | 1 | 1 RPS10L   | K02947 |
| ENSG00000101280 | -3.68859 | -2.060656 | 1 | 1 ANGPT4   | K05467 |
| ENSG00000101460 | -3.68859 | -2.060656 | 1 | 1 MAP1LC3A | K10435 |
| ENSG00000101670 | -3.68859 | -2.060656 | 1 | 1 LIPG     | K01046 |
| ENSG00000101842 | -3.68859 | -2.060656 | 1 | 1 VSIG1    | -      |
| ENSG00000102312 | -3.68859 | -2.060656 | 1 | 1 PORCN    | K00181 |
| ENSG00000104814 | -3.68859 | -2.060656 | 1 | 1 MAP4K1   | K04408 |
| ENSG00000105131 | -3.68859 | -2.060656 | 1 | 1 EPHX3    | -      |
| ENSG00000105219 | -3.68859 | -2.060656 | 1 | 1 CNTD2    | -      |
| ENSG00000106034 | -3.68859 | -2.060656 | 1 | 1 CPED1    | -      |
| ENSG00000106483 | -3.68859 | -2.060656 | 1 | 1 SFRP4    | K02185 |
| ENSG00000108255 | -3.68859 | -2.060656 | 1 | 1 CRYBA1   | -      |
| ENSG00000109047 | -3.68859 | -2.060656 | 1 | 1 RCVRN    | K13764 |
| ENSG00000109163 | -3.68859 | -2.060656 | 1 | 1 GNRHR    | K04280 |
| ENSG00000109625 | -3.68859 | -2.060656 | 1 | 1 CPZ      | K13022 |
| ENSG00000109758 | -3.68859 | -2.060656 | 1 | 1 HGFAC    | K09631 |
| ENSG00000112053 | -3.68859 | -2.060656 | 1 | 1 SLC26A8  | K14705 |
| ENSG00000113263 | -3.68859 | -2.060656 | 1 | 1 ITK      | K07363 |
| ENSG00000113946 | -3.68859 | -2.060656 | 1 | 1 CLDN16   | K06087 |
| ENSG00000114638 | -3.68859 | -2.060656 | 1 | 1 UPK1B    | K17347 |
| ENSG00000115085 | -3.68859 | -2.060656 | 1 | 1 ZAP70    | K07360 |
| ENSG00000115221 | -3.68859 | -2.060656 | 1 | 1 ITGB6    | -      |
| ENSG00000116774 | -3.68859 | -2.060656 | 1 | 1 OLFML3   | -      |
| ENSG00000118520 | -3.68859 | -2.060656 | 1 | 1 ARG1     | K01476 |
| ENSG00000119608 | -3.68859 | -2.060656 | 1 | 1 PROX2    | -      |
| ENSG00000120328 | -3.68859 | -2.060656 | 1 | 1 PCDHB12  | K16494 |
| ENSG00000121764 | -3.68859 | -2.060656 | 1 | 1 HCRTR1   | K04238 |
| ENSG00000121904 | -3.68859 | -2.060656 | 1 | 1 CSMD2    | K17495 |
| ENSG00000122188 | -3.68859 | -2.060656 | 1 | 1 LAX1     | K12022 |
| ENSG00000123500 | -3.68859 | -2.060656 | 1 | 1 COL10A1  | K19479 |
| ENSG00000124215 | -3.68859 | -2.060656 | 1 | 1 CDH26    | -      |
| ENSG00000125571 | -3.68859 | -2.060656 | 1 | 1 IL37     | K05485 |
| ENSG00000125895 | -3.68859 | -2.060656 | 1 | 1 TMEM74B  | -      |
| ENSG00000128250 | -3.68859 | -2.060656 | 1 | 1 RFPL1    | -      |
| ENSG00000130201 | -3.68859 | -2.060656 | 1 | 1 EXOC3L2  | K09228 |
| ENSG00000130413 | -3.68859 | -2.060656 | 1 | 1 STK33    | K08813 |
| ENSG00000130701 | -3.68859 | -2.060656 | 1 | 1 RBBP8NL  | -      |
| ENSG00000130755 | -3.68859 | -2.060656 | 1 | 1 GMFG     | -      |
| ENSG00000130943 | -3.68859 | -2.060656 | 1 | 1 PKDREJ   | -      |
| ENSG00000131095 | -3.68859 | -2.060656 | 1 | 1 GFAP     | K05640 |
| ENSG00000131773 | -3.68859 | -2.060656 | 1 | 1 KHDRBS3  | K14942 |
| ENSG00000133477 | -3.68859 | -2.060656 | 1 | 1 FAM83F   | K12581 |
| ENSG00000135517 | -3.68859 | -2.060656 | 1 | 1 MIP      | K09863 |
| ENSG00000135702 | -3.68859 | -2.060656 | 1 | 1 CHST5    | K09670 |
| ENSG00000135828 | -3.68859 | -2.060656 | 1 | 1 RNASEL   | K01165 |
| ENSG00000135914 | -3.68859 | -2.060656 | 1 | 1 HTR2B    | K04157 |
| ENSG00000136059 | -3.68859 | -2.060656 | 1 | 1 VILL     | -      |
| ENSG00000136160 | -3.68859 | -2.060656 | 1 | 1 EDNRB    | K04198 |
| ENSG00000137691 | -3.68859 | -2.060656 | 1 | 1 C11orf70 | -      |
| ENSG00000137948 | -3.68859 | -2.060656 | 1 | 1 BRDT     | K11724 |

|                 |          |           |   |               |        |
|-----------------|----------|-----------|---|---------------|--------|
| ENSG00000137960 | -3.68859 | -2.060656 | 1 | 1 GIPC2       | -      |
| ENSG00000138315 | -3.68859 | -2.060656 | 1 | 1 OIT3        | -      |
| ENSG00000139292 | -3.68859 | -2.060656 | 1 | 1 LGR5        | K04308 |
| ENSG00000140519 | -3.68859 | -2.060656 | 1 | 1 RHCG        | K06580 |
| ENSG00000140873 | -3.68859 | -2.060656 | 1 | 1 ADAMTS18    | K08632 |
| ENSG00000141469 | -3.68859 | -2.060656 | 1 | 1 SLC14A1     | K08716 |
| ENSG00000141698 | -3.68859 | -2.060656 | 1 | 1 NT5C3B      | K01081 |
| ENSG00000143140 | -3.68859 | -2.060656 | 1 | 1 GJA5        | K07614 |
| ENSG00000143368 | -3.68859 | -2.060656 | 1 | 1 SF3B4       | K12831 |
| ENSG00000144712 | -3.68859 | -2.060656 | 1 | 1 CAND2       | K17263 |
| ENSG00000144821 | -3.68859 | -2.060656 | 1 | 1 MYH15       | K10352 |
| ENSG00000145063 | -3.68859 | -2.060656 | 1 | 1 AC062028.1  | -      |
| ENSG00000146006 | -3.68859 | -2.060656 | 1 | 1 LRRTM2      | K16665 |
| ENSG00000147485 | -3.68859 | -2.060656 | 1 | 1 PXDNL       | K19511 |
| ENSG00000147896 | -3.68859 | -2.060656 | 1 | 1 IFNK        | K05441 |
| ENSG00000149050 | -3.68859 | -2.060656 | 1 | 1 ZNF214      | K09228 |
| ENSG00000149633 | -3.68859 | -2.060656 | 1 | 1 KIAA1755    | -      |
| ENSG00000149656 | -3.68859 | -2.060656 | 1 | 1 LINC00266-1 | -      |
| ENSG00000151062 | -3.68859 | -2.060656 | 1 | 1 CACNA2D4    | K04861 |
| ENSG00000152578 | -3.68859 | -2.060656 | 1 | 1 GRIA4       | K05200 |
| ENSG00000153064 | -3.68859 | -2.060656 | 1 | 1 BANK1       | -      |
| ENSG00000153253 | -3.68859 | -2.060656 | 1 | 1 SCN3A       | K04836 |
| ENSG00000154485 | -3.68859 | -2.060656 | 1 | 1 MMP21       | K08000 |
| ENSG00000154589 | -3.68859 | -2.060656 | 1 | 1 LY96        | K05400 |
| ENSG00000154839 | -3.68859 | -2.060656 | 1 | 1 SKA1        | -      |
| ENSG00000155016 | -3.68859 | -2.060656 | 1 | 1 CYP2U1      | K07422 |
| ENSG00000155428 | -3.68859 | -2.060656 | 1 | 1 TRIM74      | K12024 |
| ENSG00000158077 | -3.68859 | -2.060656 | 1 | 1 NLRP14      | -      |
| ENSG00000158113 | -3.68859 | -2.060656 | 1 | 1 LRRC43      | -      |
| ENSG00000160185 | -3.68859 | -2.060656 | 1 | 1 UBASH3A     | K18993 |
| ENSG00000160323 | -3.68859 | -2.060656 | 1 | 1 ADAMTS13    | K08627 |
| ENSG00000160838 | -3.68859 | -2.060656 | 1 | 1 LRRC71      | -      |
| ENSG00000161610 | -3.68859 | -2.060656 | 1 | 1 HCRT        | K05246 |
| ENSG00000162426 | -3.68859 | -2.060656 | 1 | 1 SLC45A1     | K15378 |
| ENSG00000162825 | -3.68859 | -2.060656 | 1 | 1 NBPF8       | -      |
| ENSG00000162882 | -3.68859 | -2.060656 | 1 | 1 HAAO        | K00452 |
| ENSG00000162891 | -3.68859 | -2.060656 | 1 | 1 IL20        | K05444 |
| ENSG00000162998 | -3.68859 | -2.060656 | 1 | 1 FRZB        | K02185 |
| ENSG00000163121 | -3.68859 | -2.060656 | 1 | 1 NEURL3      | K15689 |
| ENSG00000163263 | -3.68859 | -2.060656 | 1 | 1 C1orf189    | -      |
| ENSG00000163689 | -3.68859 | -2.060656 | 1 | 1 C3orf67     | -      |
| ENSG00000163810 | -3.68859 | -2.060656 | 1 | 1 TGM4        | -      |
| ENSG00000163823 | -3.68859 | -2.060656 | 1 | 1 CCR1        | K04176 |
| ENSG00000163915 | -3.68859 | -2.060656 | 1 | 1 C3orf65     | -      |
| ENSG00000164175 | -3.68859 | -2.060656 | 1 | 1 SLC45A2     | K15378 |
| ENSG00000164451 | -3.68859 | -2.060656 | 1 | 1 FAM26D      | -      |
| ENSG00000164530 | -3.68859 | -2.060656 | 1 | 1 PI16        | -      |
| ENSG00000164742 | -3.68859 | -2.060656 | 1 | 1 ADCY1       | K08041 |
| ENSG00000165084 | -3.68859 | -2.060656 | 1 | 1 C8orf34     | -      |
| ENSG00000165246 | -3.68859 | -2.060656 | 1 | 1 NLGN4Y      | K07378 |
| ENSG00000165805 | -3.68859 | -2.060656 | 1 | 1 C12orf50    | K08857 |
| ENSG00000165899 | -3.68859 | -2.060656 | 1 | 1 OTOGL       | -      |
| ENSG00000165972 | -3.68859 | -2.060656 | 1 | 1 CCDC38      | -      |
| ENSG00000166183 | -3.68859 | -2.060656 | 1 | 1 ASPG        | K13278 |
| ENSG00000166402 | -3.68859 | -2.060656 | 1 | 1 TUB         | -      |
| ENSG00000166825 | -3.68859 | -2.060656 | 1 | 1 ANPEP       | K11140 |
| ENSG00000166927 | -3.68859 | -2.060656 | 1 | 1 MS4A7       | -      |
| ENSG00000167383 | -3.68859 | -2.060656 | 1 | 1 ZNF229      | K09228 |



|                 |          |           |   |                |        |
|-----------------|----------|-----------|---|----------------|--------|
| ENSG00000167780 | -3.68859 | -2.060656 | 1 | 1 SOAT2        | K00637 |
| ENSG00000167874 | -3.68859 | -2.060656 | 1 | 1 TMEM88       | K11448 |
| ENSG00000168306 | -3.68859 | -2.060656 | 1 | 1 ACOX2        | K10214 |
| ENSG00000168356 | -3.68859 | -2.060656 | 1 | 1 SCN11A       | K04843 |
| ENSG00000168454 | -3.68859 | -2.060656 | 1 | 1 TXNDC2       | -      |
| ENSG00000168748 | -3.68859 | -2.060656 | 1 | 1 CA7          | K01672 |
| ENSG00000170162 | -3.68859 | -2.060656 | 1 | 1 VGLL2        | -      |
| ENSG00000170231 | -3.68859 | -2.060656 | 1 | 1 FABP6        | K08755 |
| ENSG00000170801 | -3.68859 | -2.060656 | 1 | 1 HTRA3        | K08785 |
| ENSG00000171115 | -3.68859 | -2.060656 | 1 | 1 GIMAP8       | -      |
| ENSG00000172073 | -3.68859 | -2.060656 | 1 | 1 TEX37        | -      |
| ENSG00000172243 | -3.68859 | -2.060656 | 1 | 1 CLEC7A       | K10074 |
| ENSG00000172543 | -3.68859 | -2.060656 | 1 | 1 CTSW         | K08569 |
| ENSG00000172717 | -3.68859 | -2.060656 | 1 | 1 FAM71D       | -      |
| ENSG00000173080 | -3.68859 | -2.060656 | 1 | 1 RXFP4        | K08398 |
| ENSG00000173114 | -3.68859 | -2.060656 | 1 | 1 LRRN3        | -      |
| ENSG00000173198 | -3.68859 | -2.060656 | 1 | 1 CYSLTR1      | K04322 |
| ENSG00000173421 | -3.68859 | -2.060656 | 1 | 1 CCDC36       | K12581 |
| ENSG00000175445 | -3.68859 | -2.060656 | 1 | 1 LPL          | K01059 |
| ENSG00000176840 | -3.68859 | -2.060656 | 1 | 1 MIR7-3HG     | -      |
| ENSG00000177453 | -3.68859 | -2.060656 | 1 | 1 NIM1K        | -      |
| ENSG00000177627 | -3.68859 | -2.060656 | 1 | 1 C12orf54     | -      |
| ENSG00000177710 | -3.68859 | -2.060656 | 1 | 1 SLC35G5      | -      |
| ENSG00000178084 | -3.68859 | -2.060656 | 1 | 1 HTR3C        | K04819 |
| ENSG00000179766 | -3.68859 | -2.060656 | 1 | 1 ATP8B5P      | K01555 |
| ENSG00000180071 | -3.68859 | -2.060656 | 1 | 1 ANKRD18A     | K17299 |
| ENSG00000180878 | -3.68859 | -2.060656 | 1 | 1 C11orf42     | -      |
| ENSG00000181323 | -3.68859 | -2.060656 | 1 | 1 SPEM1        | -      |
| ENSG00000181358 | -3.68859 | -2.060656 | 1 | 1 CTAGE10P     | -      |
| ENSG00000182326 | -3.68859 | -2.060656 | 1 | 1 C1S          | K01331 |
| ENSG00000182557 | -3.68859 | -2.060656 | 1 | 1 SPNS3        | -      |
| ENSG00000182983 | -3.68859 | -2.060656 | 1 | 1 ZNF662       | K09228 |
| ENSG00000183016 | -3.68859 | -2.060656 | 1 | 1 IQCA1P1      | -      |
| ENSG00000183396 | -3.68859 | -2.060656 | 1 | 1 TMEM89       | -      |
| ENSG00000183678 | -3.68859 | -2.060656 | 1 | 1 CTAG1A       | -      |
| ENSG00000183773 | -3.68859 | -2.060656 | 1 | 1 AIFM3        | -      |
| ENSG00000184084 | -3.68859 | -2.060656 | 1 | 1 CTD-2372A4.1 | -      |
| ENSG00000184206 | -3.68859 | -2.060656 | 1 | 1 GOLGA6L4     | K10595 |
| ENSG00000184571 | -3.68859 | -2.060656 | 1 | 1 PIWIL3       | K02156 |
| ENSG00000184750 | -3.68859 | -2.060656 | 1 | 1 MAGEA2       | -      |
| ENSG00000185162 | -3.68859 | -2.060656 | 1 | 1 AP001324.1   | -      |
| ENSG00000185198 | -3.68859 | -2.060656 | 1 | 1 PRSS57       | -      |
| ENSG00000185523 | -3.68859 | -2.060656 | 1 | 1 C1orf227     | -      |
| ENSG00000187621 | -3.68859 | -2.060656 | 1 | 1 TCL6         | -      |
| ENSG00000187763 | -3.68859 | -2.060656 | 1 | 1 OR2B7P       | K04257 |
| ENSG00000187905 | -3.68859 | -2.060656 | 1 | 1 AC002472.13  | K07374 |
| ENSG00000188133 | -3.68859 | -2.060656 | 1 | 1 TMEM215      | -      |
| ENSG00000188365 | -3.68859 | -2.060656 | 1 | 1 AC092171.2   | -      |
| ENSG00000188732 | -3.68859 | -2.060656 | 1 | 1 FAM221A      | -      |
| ENSG00000188761 | -3.68859 | -2.060656 | 1 | 1 BCL2L15      | -      |
| ENSG00000189292 | -3.68859 | -2.060656 | 1 | 1 FAM150B      | -      |
| ENSG00000189375 | -3.68859 | -2.060656 | 1 | 1 TBC1D28      | K05150 |
| ENSG00000196374 | -3.68859 | -2.060656 | 1 | 1 HIST1H2BM    | K11252 |
| ENSG00000196408 | -3.68859 | -2.060656 | 1 | 1 NOXO1        | K17934 |
| ENSG00000197180 | -3.68859 | -2.060656 | 1 | 1 BX936347.1   | -      |
| ENSG00000197629 | -3.68859 | -2.060656 | 1 | 1 MPEG1        | -      |
| ENSG00000197769 | -3.68859 | -2.060656 | 1 | 1 MAP1LC3C     | K10435 |
| ENSG00000197977 | -3.68859 | -2.060656 | 1 | 1 ELOVL2       | K10205 |

|                 |          |           |   |                 |        |
|-----------------|----------|-----------|---|-----------------|--------|
| ENSG00000198121 | -3.68859 | -2.060656 | 1 | 1 LPAR1         | K04289 |
| ENSG00000198312 | -3.68859 | -2.060656 | 1 | 1 BMS1P9        | K14569 |
| ENSG00000198857 | -3.68859 | -2.060656 | 1 | 1 HSD3BP5       | K00070 |
| ENSG00000199331 | -3.68859 | -2.060656 | 1 | 1 Y_RNA         | -      |
| ENSG00000199832 | -3.68859 | -2.060656 | 1 | 1 Y_RNA         | -      |
| ENSG00000199890 | -3.68859 | -2.060656 | 1 | 1 Y_RNA         | -      |
| ENSG00000199933 | -3.68859 | -2.060656 | 1 | 1 Y_RNA         | -      |
| ENSG00000199936 | -3.68859 | -2.060656 | 1 | 1 Y_RNA         | -      |
| ENSG00000200253 | -3.68859 | -2.060656 | 1 | 1 RNU6-529P     | -      |
| ENSG00000200344 | -3.68859 | -2.060656 | 1 | 1 Y_RNA         | -      |
| ENSG00000200376 | -3.68859 | -2.060656 | 1 | 1 RNU5E-10P     | -      |
| ENSG00000200502 | -3.68859 | -2.060656 | 1 | 1 Y_RNA         | -      |
| ENSG00000200674 | -3.68859 | -2.060656 | 1 | 1 RN7SKP160     | -      |
| ENSG00000200922 | -3.68859 | -2.060656 | 1 | 1 Y_RNA         | -      |
| ENSG00000201592 | -3.68859 | -2.060656 | 1 | 1 snoU2_19      | -      |
| ENSG00000201724 | -3.68859 | -2.060656 | 1 | 1 Y_RNA         | -      |
| ENSG00000202343 | -3.68859 | -2.060656 | 1 | 1 SNORA2        | -      |
| ENSG00000202515 | -3.68859 | -2.060656 | 1 | 1 VTRNA1-3      | -      |
| ENSG00000202356 | -3.68859 | -2.060656 | 1 | 1 RP11-296A18.3 | -      |
| ENSG00000203426 | -3.68859 | -2.060656 | 1 | 1 AC140061.7    | K17985 |
| ENSG00000203785 | -3.68859 | -2.060656 | 1 | 1 SPRR2E        | -      |
| ENSG00000203900 | -3.68859 | -2.060656 | 1 | 1 RP11-261N11.8 | -      |
| ENSG00000204010 | -3.68859 | -2.060656 | 1 | 1 IFIT1B        | K14217 |
| ENSG00000204152 | -3.68859 | -2.060656 | 1 | 1 TIMM23B       | K17794 |
| ENSG00000204652 | -3.68859 | -2.060656 | 1 | 1 RPS26P8       | K02976 |
| ENSG00000204653 | -3.68859 | -2.060656 | 1 | 1 ASPDH         | K16360 |
| ENSG00000204837 | -3.68859 | -2.060656 | 1 | 1 RP11-204M4.2  | -      |
| ENSG00000205089 | -3.68859 | -2.060656 | 1 | 1 CCNI2         | -      |
| ENSG00000205147 | -3.68859 | -2.060656 | 1 | 1 AC016586.1    | K12581 |
| ENSG00000205209 | -3.68859 | -2.060656 | 1 | 1 SCGB2B2       | -      |
| ENSG00000205420 | -3.68859 | -2.060656 | 1 | 1 KRT6A         | K07605 |
| ENSG00000205784 | -3.68859 | -2.060656 | 1 | 1 ARRDC5        | K12756 |
| ENSG00000205890 | -3.68859 | -2.060656 | 1 | 1 RP11-473M20.5 | -      |
| ENSG00000205922 | -3.68859 | -2.060656 | 1 | 1 ONECUT3       | K08026 |
| ENSG00000206142 | -3.68859 | -2.060656 | 1 | 1 FAM230C       | -      |
| ENSG00000206612 | -3.68859 | -2.060656 | 1 | 1 SNORA2A       | -      |
| ENSG00000206640 | -3.68859 | -2.060656 | 1 | 1 Y_RNA         | -      |
| ENSG00000206651 | -3.68859 | -2.060656 | 1 | 1 Y_RNA         | -      |
| ENSG00000206747 | -3.68859 | -2.060656 | 1 | 1 RNU6-245P     | -      |
| ENSG00000206808 | -3.68859 | -2.060656 | 1 | 1 Y_RNA         | -      |
| ENSG00000206832 | -3.68859 | -2.060656 | 1 | 1 RNU6V         | -      |
| ENSG00000206913 | -3.68859 | -2.060656 | 1 | 1 SNORA7        | -      |
| ENSG00000207217 | -3.68859 | -2.060656 | 1 | 1 SNORA42       | -      |
| ENSG00000207313 | -3.68859 | -2.060656 | 1 | 1 SNORA2B       | -      |
| ENSG00000207342 | -3.68859 | -2.060656 | 1 | 1 Y_RNA         | -      |
| ENSG00000207419 | -3.68859 | -2.060656 | 1 | 1 SNORA67       | -      |
| ENSG00000207438 | -3.68859 | -2.060656 | 1 | 1 Y_RNA         | -      |
| ENSG00000207450 | -3.68859 | -2.060656 | 1 | 1 Y_RNA         | -      |
| ENSG00000207568 | -3.68859 | -2.060656 | 1 | 1 MIR203        | -      |
| ENSG00000207698 | -3.68859 | -2.060656 | 1 | 1 MIR32         | -      |
| ENSG00000207975 | -3.68859 | -2.060656 | 1 | 1 MIR181B1      | -      |
| ENSG00000211451 | -3.68859 | -2.060656 | 1 | 1 GNRHR2        | K04280 |
| ENSG00000212402 | -3.68859 | -2.060656 | 1 | 1 SNORA74B      | -      |
| ENSG00000212710 | -3.68859 | -2.060656 | 1 | 1 CTAGE1        | -      |
| ENSG00000213014 | -3.68859 | -2.060656 | 1 | 1 VN2R17P       | -      |
| ENSG00000213471 | -3.68859 | -2.060656 | 1 | 1 TTLL13        | K16582 |
| ENSG00000213763 | -3.68859 | -2.060656 | 1 | 1 ACTBP2        | K05692 |
| ENSG00000214433 | -3.68859 | -2.060656 | 1 | 1 AC091167.3    | K10595 |

|                 |          |           |   |                 |        |
|-----------------|----------|-----------|---|-----------------|--------|
| ENSG00000214559 | -3.68859 | -2.060656 | 1 | 1 RP11-323J4.1  | -      |
| ENSG00000215102 | -3.68859 | -2.060656 | 1 | 1 TERF1P4       | K11110 |
| ENSG00000215199 | -3.68859 | -2.060656 | 1 | 1 YWHAZP6       | K16197 |
| ENSG00000215630 | -3.68859 | -2.060656 | 1 | 1 GUSBP9        | K01195 |
| ENSG00000215808 | -3.68859 | -2.060656 | 1 | 1 LINC01139     | -      |
| ENSG00000215912 | -3.68859 | -2.060656 | 1 | 1 TTC34         | -      |
| ENSG00000216412 | -3.68859 | -2.060656 | 1 | 1 RPL12P2       | K02870 |
| ENSG00000216867 | -3.68859 | -2.060656 | 1 | 1 AC114776.1    | K02891 |
| ENSG00000216921 | -3.68859 | -2.060656 | 1 | 1 AC131097.4    | -      |
| ENSG00000217644 | -3.68859 | -2.060656 | 1 | 1 RP4-803A2.1   | K02882 |
| ENSG00000217769 | -3.68859 | -2.060656 | 1 | 1 RP11-76H14.2  | K09560 |
| ENSG00000218416 | -3.68859 | -2.060656 | 1 | 1 AC110619.2    | -      |
| ENSG00000218631 | -3.68859 | -2.060656 | 1 | 1 RP3-395C13.1  | -      |
| ENSG00000218732 | -3.68859 | -2.060656 | 1 | 1 RP5-1046G13.2 | K09400 |
| ENSG00000219433 | -3.68859 | -2.060656 | 1 | 1 RP11-350J20.4 | K10482 |
| ENSG00000219553 | -3.68859 | -2.060656 | 1 | 1 RP1-281H8.3   | -      |
| ENSG00000219747 | -3.68859 | -2.060656 | 1 | 1 RP1-292B18.1  | K02912 |
| ENSG00000219755 | -3.68859 | -2.060656 | 1 | 1 RP1-199J3.5   | K02985 |
| ENSG00000220925 | -3.68859 | -2.060656 | 1 | 1 IGBP1-AS2     | -      |
| ENSG00000221338 | -3.68859 | -2.060656 | 1 | 1 AC108456.1    | -      |
| ENSG00000221487 | -3.68859 | -2.060656 | 1 | 1 AC069294.1    | -      |
| ENSG00000221716 | -3.68859 | -2.060656 | 1 | 1 SNORA11       | -      |
| ENSG00000222378 | -3.68859 | -2.060656 | 1 | 1 RNA5SP44      | -      |
| ENSG00000222448 | -3.68859 | -2.060656 | 1 | 1 RN7SKP150     | -      |
| ENSG00000223485 | -3.68859 | -2.060656 | 1 | 1 RP11-417E7.1  | -      |
| ENSG00000223528 | -3.68859 | -2.060656 | 1 | 1 RP11-223P11.3 | -      |
| ENSG00000223571 | -3.68859 | -2.060656 | 1 | 1 DHRSX-IT1     | -      |
| ENSG00000223617 | -3.68859 | -2.060656 | 1 | 1 LINC00370     | -      |
| ENSG00000223669 | -3.68859 | -2.060656 | 1 | 1 RP11-93B14.4  | -      |
| ENSG00000223722 | -3.68859 | -2.060656 | 1 | 1 RP11-467L13.5 | K06566 |
| ENSG00000223935 | -3.68859 | -2.060656 | 1 | 1 AC008074.3    | -      |
| ENSG00000224014 | -3.68859 | -2.060656 | 1 | 1 RP11-488L18.6 | K12160 |
| ENSG00000224376 | -3.68859 | -2.060656 | 1 | 1 AC017104.6    | -      |
| ENSG00000224431 | -3.68859 | -2.060656 | 1 | 1 AC063976.7    | K17985 |
| ENSG00000224479 | -3.68859 | -2.060656 | 1 | 1 AC136289.1    | -      |
| ENSG00000224745 | -3.68859 | -2.060656 | 1 | 1 RP11-380G5.2  | -      |
| ENSG00000224965 | -3.68859 | -2.060656 | 1 | 1 KCNC4-AS1     | -      |
| ENSG00000224984 | -3.68859 | -2.060656 | 1 | 1 RP11-524H19.2 | -      |
| ENSG00000224985 | -3.68859 | -2.060656 | 1 | 1 RP11-297K8.2  | -      |
| ENSG00000225195 | -3.68859 | -2.060656 | 1 | 1 RP11-338E21.2 | -      |
| ENSG00000225362 | -3.68859 | -2.060656 | 1 | 1 CT62          | -      |
| ENSG00000225392 | -3.68859 | -2.060656 | 1 | 1 AC016700.4    | K02919 |
| ENSG00000225555 | -3.68859 | -2.060656 | 1 | 1 AP000320.6    | -      |
| ENSG00000225572 | -3.68859 | -2.060656 | 1 | 1 DOCK4-AS1     | -      |
| ENSG00000225946 | -3.68859 | -2.060656 | 1 | 1 RP11-395B7.2  | -      |
| ENSG00000225964 | -3.68859 | -2.060656 | 1 | 1 AC017076.5    | -      |
| ENSG00000226650 | -3.68859 | -2.060656 | 1 | 1 KIF4B         | K10395 |
| ENSG00000226694 | -3.68859 | -2.060656 | 1 | 1 RP11-69C17.2  | -      |
| ENSG00000226859 | -3.68859 | -2.060656 | 1 | 1 RP11-48F14.2  | -      |
| ENSG00000226965 | -3.68859 | -2.060656 | 1 | 1 AC003088.1    | -      |
| ENSG00000227082 | -3.68859 | -2.060656 | 1 | 1 AL592494.5    | -      |
| ENSG00000227163 | -3.68859 | -2.060656 | 1 | 1 RP5-1198O20.5 | K12581 |
| ENSG00000227197 | -3.68859 | -2.060656 | 1 | 1 AC009518.8    | -      |
| ENSG00000227237 | -3.68859 | -2.060656 | 1 | 1 AL672294.1    | -      |
| ENSG00000227347 | -3.68859 | -2.060656 | 1 | 1 HNRNPKP2      | K12886 |
| ENSG00000227459 | -3.68859 | -2.060656 | 1 | 1 AC079612.2    | -      |
| ENSG00000227479 | -3.68859 | -2.060656 | 1 | 1 AC124861.1    | -      |
| ENSG00000227934 | -3.68859 | -2.060656 | 1 | 1 RP11-423F24.3 | -      |

|                 |          |           |   |                 |        |
|-----------------|----------|-----------|---|-----------------|--------|
| ENSG00000227999 | -3.68859 | -2.060656 | 1 | 1 MTND5P1       | -      |
| ENSG00000228010 | -3.68859 | -2.060656 | 1 | 1 AC073343.13   | -      |
| ENSG00000228366 | -3.68859 | -2.060656 | 1 | 1 RP11-18B3.3   | K12900 |
| ENSG00000228369 | -3.68859 | -2.060656 | 1 | 1 TXNDC12-AS1   | -      |
| ENSG00000228420 | -3.68859 | -2.060656 | 1 | 1 RP4-735C1.6   | -      |
| ENSG00000228717 | -3.68859 | -2.060656 | 1 | 1 AF013593.1    | -      |
| ENSG00000228766 | -3.68859 | -2.060656 | 1 | 1 RPL7L1P8      | -      |
| ENSG00000228793 | -3.68859 | -2.060656 | 1 | 1 RP1-223B1.1   | -      |
| ENSG00000228798 | -3.68859 | -2.060656 | 1 | 1 AP000473.5    | -      |
| ENSG00000229082 | -3.68859 | -2.060656 | 1 | 1 OR5AW1P       | K04257 |
| ENSG00000229204 | -3.68859 | -2.060656 | 1 | 1 PTGES3P3      | K15730 |
| ENSG00000229278 | -3.68859 | -2.060656 | 1 | 1 RP11-483F11.7 | -      |
| ENSG00000229298 | -3.68859 | -2.060656 | 1 | 1 TUBB8P1       | K07375 |
| ENSG00000229382 | -3.68859 | -2.060656 | 1 | 1 BX322557.13   | -      |
| ENSG00000229563 | -3.68859 | -2.060656 | 1 | 1 RP11-245M24.1 | -      |
| ENSG00000229567 | -3.68859 | -2.060656 | 1 | 1 RP4-717I23.2  | K02924 |
| ENSG00000229598 | -3.68859 | -2.060656 | 1 | 1 PRDX3P1       | K03386 |
| ENSG00000229750 | -3.68859 | -2.060656 | 1 | 1 AC096649.2    | -      |
| ENSG00000229862 | -3.68859 | -2.060656 | 1 | 1 RP11-505P4.7  | -      |
| ENSG00000229983 | -3.68859 | -2.060656 | 1 | 1 RP11-15I11.2  | -      |
| ENSG00000229992 | -3.68859 | -2.060656 | 1 | 1 HMGB3P9       | K11296 |
| ENSG00000230037 | -3.68859 | -2.060656 | 1 | 1 UBBP1         | K04551 |
| ENSG00000230109 | -3.68859 | -2.060656 | 1 | 1 RP11-275N1.1  | -      |
| ENSG00000230204 | -3.68859 | -2.060656 | 1 | 1 FTH1P5        | K00522 |
| ENSG00000230251 | -3.68859 | -2.060656 | 1 | 1 PHBP4         | K17080 |
| ENSG00000230257 | -3.68859 | -2.060656 | 1 | 1 NFE4          | -      |
| ENSG00000230260 | -3.68859 | -2.060656 | 1 | 1 RP11-75C23.1  | -      |
| ENSG00000230358 | -3.68859 | -2.060656 | 1 | 1 RP11-166O4.1  | K08694 |
| ENSG00000230479 | -3.68859 | -2.060656 | 1 | 1 AP000695.6    | -      |
| ENSG00000230778 | -3.68859 | -2.060656 | 1 | 1 ANKRD63       | -      |
| ENSG00000230793 | -3.68859 | -2.060656 | 1 | 1 SMARCE1P5     | K11651 |
| ENSG00000230882 | -3.68859 | -2.060656 | 1 | 1 AC005077.14   | -      |
| ENSG00000230943 | -3.68859 | -2.060656 | 1 | 1 RP11-367G18.1 | -      |
| ENSG00000230946 | -3.68859 | -2.060656 | 1 | 1 HNRNPA1P68    | K12741 |
| ENSG00000231134 | -3.68859 | -2.060656 | 1 | 1 TCF7L1-IT1    | -      |
| ENSG00000231333 | -3.68859 | -2.060656 | 1 | 1 RPL34P6       | K02915 |
| ENSG00000231459 | -3.68859 | -2.060656 | 1 | 1 LINC00032     | -      |
| ENSG00000231665 | -3.68859 | -2.060656 | 1 | 1 OGFOD1P1      | -      |
| ENSG00000231845 | -3.68859 | -2.060656 | 1 | 1 HMGB3P14      | K11296 |
| ENSG00000232022 | -3.68859 | -2.060656 | 1 | 1 RP5-1109J22.1 | K15528 |
| ENSG00000232124 | -3.68859 | -2.060656 | 1 | 1 AP001057.1    | -      |
| ENSG00000232352 | -3.68859 | -2.060656 | 1 | 1 SEMA3B-AS1    | -      |
| ENSG00000232451 | -3.68859 | -2.060656 | 1 | 1 AC016768.1    | -      |
| ENSG00000232456 | -3.68859 | -2.060656 | 1 | 1 RP11-5P18.10  | -      |
| ENSG00000232519 | -3.68859 | -2.060656 | 1 | 1 RP11-29H23.4  | -      |
| ENSG00000232608 | -3.68859 | -2.060656 | 1 | 1 TIMM9P2       | K17777 |
| ENSG00000232645 | -3.68859 | -2.060656 | 1 | 1 RP3-322G13.5  | -      |
| ENSG00000232650 | -3.68859 | -2.060656 | 1 | 1 RP5-834N19.1  | -      |
| ENSG00000232693 | -3.68859 | -2.060656 | 1 | 1 AC012370.2    | -      |
| ENSG00000232768 | -3.68859 | -2.060656 | 1 | 1 RP11-201O14.2 | K02980 |
| ENSG00000233117 | -3.68859 | -2.060656 | 1 | 1 LINC00702     | -      |
| ENSG00000233186 | -3.68859 | -2.060656 | 1 | 1 RP11-307I14.3 | K17846 |
| ENSG00000233205 | -3.68859 | -2.060656 | 1 | 1 AC108479.2    | -      |
| ENSG00000233219 | -3.68859 | -2.060656 | 1 | 1 RP11-89N17.3  | -      |
| ENSG00000233347 | -3.68859 | -2.060656 | 1 | 1 ERP29P1       | K09586 |
| ENSG00000233478 | -3.68859 | -2.060656 | 1 | 1 RP1-187B23.1  | -      |
| ENSG00000233558 | -3.68859 | -2.060656 | 1 | 1 RP3-486I3.4   | K02989 |
| ENSG00000233602 | -3.68859 | -2.060656 | 1 | 1 ERI3-IT1      | -      |

|                 |          |           |   |                   |        |
|-----------------|----------|-----------|---|-------------------|--------|
| ENSG00000233956 | -3.68859 | -2.060656 | 1 | 1 BTF3P6          | K01527 |
| ENSG00000234203 | -3.68859 | -2.060656 | 1 | 1 RP5-1050D4.2    | -      |
| ENSG00000234245 | -3.68859 | -2.060656 | 1 | 1 RP11-94I2.4     | -      |
| ENSG00000234319 | -3.68859 | -2.060656 | 1 | 1 RPS12P2         | K02951 |
| ENSG00000234336 | -3.68859 | -2.060656 | 1 | 1 JAZF1-AS1       | -      |
| ENSG00000234384 | -3.68859 | -2.060656 | 1 | 1 LINC01049       | -      |
| ENSG00000234405 | -3.68859 | -2.060656 | 1 | 1 LL0XNC01-250H12 | -      |
| ENSG00000234523 | -3.68859 | -2.060656 | 1 | 1 NDUFB1P2        | K03957 |
| ENSG00000234699 | -3.68859 | -2.060656 | 1 | 1 RP11-225H22.4   | -      |
| ENSG00000234772 | -3.68859 | -2.060656 | 1 | 1 LINC00412       | -      |
| ENSG00000234801 | -3.68859 | -2.060656 | 1 | 1 MORF4           | K11339 |
| ENSG00000235062 | -3.68859 | -2.060656 | 1 | 1 BCRP5           | K08878 |
| ENSG00000235123 | -3.68859 | -2.060656 | 1 | 1 DSCAM-AS1       | -      |
| ENSG00000235156 | -3.68859 | -2.060656 | 1 | 1 TMEM30C         | -      |
| ENSG00000235180 | -3.68859 | -2.060656 | 1 | 1 LINC00601       | -      |
| ENSG00000235376 | -3.68859 | -2.060656 | 1 | 1 RPEL1           | K01783 |
| ENSG00000235426 | -3.68859 | -2.060656 | 1 | 1 RP11-342M3.5    | -      |
| ENSG00000235574 | -3.68859 | -2.060656 | 1 | 1 AC073150.6      | K14822 |
| ENSG00000235605 | -3.68859 | -2.060656 | 1 | 1 RP5-827C21.1    | K02958 |
| ENSG00000235701 | -3.68859 | -2.060656 | 1 | 1 PCBP2P1         | K13162 |
| ENSG00000235740 | -3.68859 | -2.060656 | 1 | 1 RP11-436I24.1   | -      |
| ENSG00000235786 | -3.68859 | -2.060656 | 1 | 1 ZNRF3-IT1       | -      |
| ENSG00000235907 | -3.68859 | -2.060656 | 1 | 1 RP4-580O19.2    | K02727 |
| ENSG00000235908 | -3.68859 | -2.060656 | 1 | 1 RHOA-IT1        | -      |
| ENSG00000236024 | -3.68859 | -2.060656 | 1 | 1 RP11-483H20.6   | -      |
| ENSG00000236048 | -3.68859 | -2.060656 | 1 | 1 AC013470.6      | K11090 |
| ENSG00000236327 | -3.68859 | -2.060656 | 1 | 1 RP11-759F5.1    | -      |
| ENSG00000236545 | -3.68859 | -2.060656 | 1 | 1 AP001619.3      | -      |
| ENSG00000236554 | -3.68859 | -2.060656 | 1 | 1 ASN3P3          | K01953 |
| ENSG00000236655 | -3.68859 | -2.060656 | 1 | 1 AC023347.2      | K05038 |
| ENSG00000237233 | -3.68859 | -2.060656 | 1 | 1 RP11-809M12.1   | -      |
| ENSG00000237418 | -3.68859 | -2.060656 | 1 | 1 AC069257.6      | K02924 |
| ENSG00000237609 | -3.68859 | -2.060656 | 1 | 1 AF064858.10     | -      |
| ENSG00000237714 | -3.68859 | -2.060656 | 1 | 1 P4HA2-AS1       | -      |
| ENSG00000237870 | -3.68859 | -2.060656 | 1 | 1 AC073130.1      | -      |
| ENSG00000238055 | -3.68859 | -2.060656 | 1 | 1 RP1-128O3.6     | K02929 |
| ENSG00000238059 | -3.68859 | -2.060656 | 1 | 1 HSPE1P21        | K04078 |
| ENSG00000238171 | -3.68859 | -2.060656 | 1 | 1 AC068196.1      | -      |
| ENSG00000238251 | -3.68859 | -2.060656 | 1 | 1 RP11-172F4.2    | K14842 |
| ENSG00000238258 | -3.68859 | -2.060656 | 1 | 1 RP11-342D11.2   | -      |
| ENSG00000238583 | -3.68859 | -2.060656 | 1 | 1 snoU13          | -      |
| ENSG00000238665 | -3.68859 | -2.060656 | 1 | 1 snoU13          | -      |
| ENSG00000238824 | -3.68859 | -2.060656 | 1 | 1 snoU13          | -      |
| ENSG00000239300 | -3.68859 | -2.060656 | 1 | 1 RP11-400L8.2    | -      |
| ENSG00000239393 | -3.68859 | -2.060656 | 1 | 1 CTD-2301A4.1    | K02969 |
| ENSG00000239912 | -3.68859 | -2.060656 | 1 | 1 RPL39P36        | K02924 |
| ENSG00000239948 | -3.68859 | -2.060656 | 1 | 1 RN7SL368P       | -      |
| ENSG00000240455 | -3.68859 | -2.060656 | 1 | 1 RN7SL671P       | -      |
| ENSG00000240463 | -3.68859 | -2.060656 | 1 | 1 RPS19P3         | K02966 |
| ENSG00000240497 | -3.68859 | -2.060656 | 1 | 1 RP11-185E8.1    | -      |
| ENSG00000240522 | -3.68859 | -2.060656 | 1 | 1 RPL7AP10        | K02936 |
| ENSG00000240724 | -3.68859 | -2.060656 | 1 | 1 RPS12P15        | -      |
| ENSG00000241217 | -3.68859 | -2.060656 | 1 | 1 RN7SL809P       | -      |
| ENSG00000241352 | -3.68859 | -2.060656 | 1 | 1 RP11-392P7.1    | K02991 |
| ENSG00000241464 | -3.68859 | -2.060656 | 1 | 1 RPL39P38        | K02924 |
| ENSG00000241520 | -3.68859 | -2.060656 | 1 | 1 AC098820.4      | -      |
| ENSG00000241556 | -3.68859 | -2.060656 | 1 | 1 RP11-490G8.1    | K02905 |
| ENSG00000241635 | -3.68859 | -2.060656 | 1 | 1 UGT1A8          | K00699 |

|                 |          |           |   |                   |        |
|-----------------|----------|-----------|---|-------------------|--------|
| ENSG00000241745 | -3.68859 | -2.060656 | 1 | 1 RN7SL788P       | --     |
| ENSG00000241770 | -3.68859 | -2.060656 | 1 | 1 RP11-555M1.3    | --     |
| ENSG00000241818 | -3.68859 | -2.060656 | 1 | 1 RP11-1000B6.2   | --     |
| ENSG00000242095 | -3.68859 | -2.060656 | 1 | 1 RN7SL113P       | --     |
| ENSG00000242375 | -3.68859 | -2.060656 | 1 | 1 RP11-498P14.3   | --     |
| ENSG00000242412 | -3.68859 | -2.060656 | 1 | 1 DBIL5P2         | --     |
| ENSG00000242951 | -3.68859 | -2.060656 | 1 | 1 RP11-507E23.1   | K02974 |
| ENSG00000242992 | -3.68859 | -2.060656 | 1 | 1 FTH1P4          | K00522 |
| ENSG00000243339 | -3.68859 | -2.060656 | 1 | 1 RN7SL738P       | --     |
| ENSG00000243637 | -3.68859 | -2.060656 | 1 | 1 AC019221.4      | --     |
| ENSG00000243672 | -3.68859 | -2.060656 | 1 | 1 RPS3AP40        | K02984 |
| ENSG00000244040 | -3.68859 | -2.060656 | 1 | 1 IL12A-AS1       | --     |
| ENSG00000244137 | -3.68859 | -2.060656 | 1 | 1 RP11-99J16__A.2 | --     |
| ENSG00000246016 | -3.68859 | -2.060656 | 1 | 1 RP11-1C1.7      | --     |
| ENSG00000247774 | -3.68859 | -2.060656 | 1 | 1 PCED1B-AS1      | --     |
| ENSG00000248234 | -3.68859 | -2.060656 | 1 | 1 CTD-2108O9.4    | K02901 |
| ENSG00000248254 | -3.68859 | -2.060656 | 1 | 1 AC092597.3      | --     |
| ENSG00000248515 | -3.68859 | -2.060656 | 1 | 1 RP11-608O21.1   | --     |
| ENSG00000248590 | -3.68859 | -2.060656 | 1 | 1 GLDCP1          | K00281 |
| ENSG00000248696 | -3.68859 | -2.060656 | 1 | 1 AC011406.2      | --     |
| ENSG00000248713 | -3.68859 | -2.060656 | 1 | 1 RP11-766F14.2   | --     |
| ENSG00000248746 | -3.68859 | -2.060656 | 1 | 1 ACTN3           | K05699 |
| ENSG00000248996 | -3.68859 | -2.060656 | 1 | 1 RP11-1334A24.6  | --     |
| ENSG00000249006 | -3.68859 | -2.060656 | 1 | 1 RP11-317B7.2    | K14416 |
| ENSG00000249085 | -3.68859 | -2.060656 | 1 | 1 CTD-2631K10.1   | --     |
| ENSG00000249140 | -3.68859 | -2.060656 | 1 | 1 PRDX2P3         | K03386 |
| ENSG00000249212 | -3.68859 | -2.060656 | 1 | 1 ATP1B1P1        | K01540 |
| ENSG00000249240 | -3.68859 | -2.060656 | 1 | 1 AC069368.3      | --     |
| ENSG00000249286 | -3.68859 | -2.060656 | 1 | 1 CTD-2210P15.2   | K01611 |
| ENSG00000249304 | -3.68859 | -2.060656 | 1 | 1 RP11-26P13.2    | --     |
| ENSG00000249378 | -3.68859 | -2.060656 | 1 | 1 LINC01060       | --     |
| ENSG00000249526 | -3.68859 | -2.060656 | 1 | 1 CTB-35F21.1     | --     |
| ENSG00000249532 | -3.68859 | -2.060656 | 1 | 1 MIR302B         | --     |
| ENSG00000249593 | -3.68859 | -2.060656 | 1 | 1 CTB-46B19.2     | --     |
| ENSG00000249602 | -3.68859 | -2.060656 | 1 | 1 RP11-98D18.3    | --     |
| ENSG00000249655 | -3.68859 | -2.060656 | 1 | 1 CTC-325J23.2    | --     |
| ENSG00000249691 | -3.68859 | -2.060656 | 1 | 1 RP11-445J14.1   | --     |
| ENSG00000249898 | -3.68859 | -2.060656 | 1 | 1 CTD-2541M15.1   | --     |
| ENSG00000250734 | -3.68859 | -2.060656 | 1 | 1 RP11-404E16.1   | --     |
| ENSG00000251131 | -3.68859 | -2.060656 | 1 | 1 CTD-2035E11.3   | --     |
| ENSG00000251155 | -3.68859 | -2.060656 | 1 | 1 RP11-384K6.4    | K16941 |
| ENSG00000251537 | -3.68859 | -2.060656 | 1 | 1 RP11-385D13.1   | K10266 |
| ENSG00000251556 | -3.68859 | -2.060656 | 1 | 1 RP11-118M9.3    | --     |
| ENSG00000251576 | -3.68859 | -2.060656 | 1 | 1 RP11-536I6.1    | --     |
| ENSG00000251598 | -3.68859 | -2.060656 | 1 | 1 RP11-789C2.1    | --     |
| ENSG00000251667 | -3.68859 | -2.060656 | 1 | 1 RP11-844P9.3    | K11864 |
| ENSG00000251739 | -3.68859 | -2.060656 | 1 | 1 RNU6-1053P      | --     |
| ENSG00000251806 | -3.68859 | -2.060656 | 1 | 1 SNORD119        | --     |
| ENSG00000252106 | -3.68859 | -2.060656 | 1 | 1 Y_RNA           | --     |
| ENSG00000252334 | -3.68859 | -2.060656 | 1 | 1 RNU6-1337P      | --     |
| ENSG00000252390 | -3.68859 | -2.060656 | 1 | 1 RNU5F-4P        | --     |
| ENSG00000252464 | -3.68859 | -2.060656 | 1 | 1 RN7SKP70        | --     |
| ENSG00000252498 | -3.68859 | -2.060656 | 1 | 1 RNU6-1016P      | --     |
| ENSG00000252643 | -3.68859 | -2.060656 | 1 | 1 RNU6-1136P      | --     |
| ENSG00000252896 | -3.68859 | -2.060656 | 1 | 1 AC067957.1      | --     |
| ENSG00000252933 | -3.68859 | -2.060656 | 1 | 1 RNU6-1223P      | --     |
| ENSG00000252942 | -3.68859 | -2.060656 | 1 | 1 RNA5SP290       | --     |
| ENSG00000253054 | -3.68859 | -2.060656 | 1 | 1 RNU7-77P        | --     |

|                 |          |           |   |                  |        |
|-----------------|----------|-----------|---|------------------|--------|
| ENSG00000253154 | -3.68859 | -2.060656 | 1 | 1 CTA-392E5.1    | -      |
| ENSG00000253516 | -3.68859 | -2.060656 | 1 | 1 HMGB1P41       | K10802 |
| ENSG00000253774 | -3.68859 | -2.060656 | 1 | 1 CTD-3023L14.1  | -      |
| ENSG00000253898 | -3.68859 | -2.060656 | 1 | 1 RP11-51M18.1   | -      |
| ENSG00000253972 | -3.68859 | -2.060656 | 1 | 1 RP11-4K16.2    | -      |
| ENSG00000254063 | -3.68859 | -2.060656 | 1 | 1 DUXAP2         | -      |
| ENSG00000254226 | -3.68859 | -2.060656 | 1 | 1 CTB-12O2.1     | -      |
| ENSG00000254339 | -3.68859 | -2.060656 | 1 | 1 RP11-267L5.1   | -      |
| ENSG00000254503 | -3.68859 | -2.060656 | 1 | 1 CTD-2521M24.4  | K12581 |
| ENSG00000254671 | -3.68859 | -2.060656 | 1 | 1 STT3A-AS1      | -      |
| ENSG00000254739 | -3.68859 | -2.060656 | 1 | 1 RP13-46H24.1   | -      |
| ENSG00000254852 | -3.68859 | -2.060656 | 1 | 1 NPIPA2         | K01896 |
| ENSG00000254985 | -3.68859 | -2.060656 | 1 | 1 RSF1-IT2       | -      |
| ENSG00000255108 | -3.68859 | -2.060656 | 1 | 1 AP006621.8     | -      |
| ENSG00000255124 | -3.68859 | -2.060656 | 1 | 1 RP11-680F20.5  | -      |
| ENSG00000255169 | -3.68859 | -2.060656 | 1 | 1 RP11-646J21.3  | -      |
| ENSG00000255237 | -3.68859 | -2.060656 | 1 | 1 RP13-317D12.3  | -      |
| ENSG00000255322 | -3.68859 | -2.060656 | 1 | 1 RP11-22P4.1    | -      |
| ENSG00000255477 | -3.68859 | -2.060656 | 1 | 1 RP11-63D14.1   | -      |
| ENSG00000255572 | -3.68859 | -2.060656 | 1 | 1 RP11-273B20.3  | -      |
| ENSG00000255647 | -3.68859 | -2.060656 | 1 | 1 AC093510.1     | -      |
| ENSG00000255748 | -3.68859 | -2.060656 | 1 | 1 AC226150.4     | -      |
| ENSG00000255823 | -3.68859 | -2.060656 | 1 | 1 MTRNR2L8       | K01982 |
| ENSG00000255836 | -3.68859 | -2.060656 | 1 | 1 RP11-157G21.2  | -      |
| ENSG00000255933 | -3.68859 | -2.060656 | 1 | 1 RP11-495K9.5   | -      |
| ENSG00000255970 | -3.68859 | -2.060656 | 1 | 1 RP11-43N5.1    | -      |
| ENSG00000256039 | -3.68859 | -2.060656 | 1 | 1 RP11-291B21.2  | -      |
| ENSG00000256155 | -3.68859 | -2.060656 | 1 | 1 RP11-277P12.9  | -      |
| ENSG00000256356 | -3.68859 | -2.060656 | 1 | 1 HSPA8P5        | K03283 |
| ENSG00000256538 | -3.68859 | -2.060656 | 1 | 1 RP11-847H18.3  | -      |
| ENSG00000257184 | -3.68859 | -2.060656 | 1 | 1 RP1-170O19.20  | K09294 |
| ENSG00000257501 | -3.68859 | -2.060656 | 1 | 1 RP11-1016B18.1 | -      |
| ENSG00000257569 | -3.68859 | -2.060656 | 1 | 1 GSTP1P1        | K00799 |
| ENSG00000257624 | -3.68859 | -2.060656 | 1 | 1 RP1-128M12.3   | -      |
| ENSG00000257735 | -3.68859 | -2.060656 | 1 | 1 RP11-370I10.6  | -      |
| ENSG00000258128 | -3.68859 | -2.060656 | 1 | 1 MKRN9P         | K15687 |
| ENSG00000258343 | -3.68859 | -2.060656 | 1 | 1 RP11-536G4.2   | -      |
| ENSG00000258365 | -3.68859 | -2.060656 | 1 | 1 RP11-1105G2.3  | -      |
| ENSG00000258684 | -3.68859 | -2.060656 | 1 | 1 BMS1P16        | K14569 |
| ENSG00000258733 | -3.68859 | -2.060656 | 1 | 1 CTD-2341M24.1  | -      |
| ENSG00000258760 | -3.68859 | -2.060656 | 1 | 1 CTD-2509G16.5  | -      |
| ENSG00000258938 | -3.68859 | -2.060656 | 1 | 1 RP11-317N8.5   | -      |
| ENSG00000258959 | -3.68859 | -2.060656 | 1 | 1 RP11-1017G21.4 | -      |
| ENSG00000259079 | -3.68859 | -2.060656 | 1 | 1 RP1-261D10.1   | -      |
| ENSG00000259083 | -3.68859 | -2.060656 | 1 | 1 RP11-407N17.4  | -      |
| ENSG00000259262 | -3.68859 | -2.060656 | 1 | 1 NDUFA3P4       | K03947 |
| ENSG00000259348 | -3.68859 | -2.060656 | 1 | 1 RP11-4G2.1     | -      |
| ENSG00000259358 | -3.68859 | -2.060656 | 1 | 1 RP11-456J20.1  | -      |
| ENSG00000259371 | -3.68859 | -2.060656 | 1 | 1 RP11-468E2.6   | K11801 |
| ENSG00000259402 | -3.68859 | -2.060656 | 1 | 1 RP11-30K9.4    | -      |
| ENSG00000259407 | -3.68859 | -2.060656 | 1 | 1 RP11-158M2.3   | -      |
| ENSG00000259415 | -3.68859 | -2.060656 | 1 | 1 RP11-7M10.2    | -      |
| ENSG00000259441 | -3.68859 | -2.060656 | 1 | 1 MRPL15P1       | K02876 |
| ENSG00000259467 | -3.68859 | -2.060656 | 1 | 1 NDUFAF4P1      | K18161 |
| ENSG00000259480 | -3.68859 | -2.060656 | 1 | 1 RP11-26F2.1    | K12200 |
| ENSG00000259532 | -3.68859 | -2.060656 | 1 | 1 RP11-138H8.2   | -      |
| ENSG00000259780 | -3.68859 | -2.060656 | 1 | 1 RP11-304L19.12 | -      |
| ENSG00000259882 | -3.68859 | -2.060656 | 1 | 1 RP11-293B20.2  | -      |

|                 |          |           |   |                 |        |
|-----------------|----------|-----------|---|-----------------|--------|
| ENSG00000259985 | -3.68859 | -2.060656 | 1 | 1 RP11-549B18.1 | --     |
| ENSG00000260035 | -3.68859 | -2.060656 | 1 | 1 CTD-2651B20.6 | --     |
| ENSG00000260198 | -3.68859 | -2.060656 | 1 | 1 RP11-441F2.2  | --     |
| ENSG00000260281 | -3.68859 | -2.060656 | 1 | 1 RP11-329J18.2 | --     |
| ENSG00000260350 | -3.68859 | -2.060656 | 1 | 1 RP11-152P23.2 | --     |
| ENSG00000260439 | -3.68859 | -2.060656 | 1 | 1 LA16c-366D3.1 | --     |
| ENSG00000260475 | -3.68859 | -2.060656 | 1 | 1 RP11-85A1.3   | --     |
| ENSG00000260509 | -3.68859 | -2.060656 | 1 | 1 RP11-271M24.2 | --     |
| ENSG00000260729 | -3.68859 | -2.060656 | 1 | 1 RP11-106M3.2  | --     |
| ENSG00000260871 | -3.68859 | -2.060656 | 1 | 1 CTD-2373J6.1  | --     |
| ENSG00000261019 | -3.68859 | -2.060656 | 1 | 1 RP11-111K18.2 | --     |
| ENSG00000261064 | -3.68859 | -2.060656 | 1 | 1 RP11-1000B6.3 | --     |
| ENSG00000261141 | -3.68859 | -2.060656 | 1 | 1 RP11-303E16.5 | --     |
| ENSG00000261191 | -3.68859 | -2.060656 | 1 | 1 RP11-16L14.2  | --     |
| ENSG00000261240 | -3.68859 | -2.060656 | 1 | 1 RP11-304L19.4 | --     |
| ENSG00000261317 | -3.68859 | -2.060656 | 1 | 1 RP11-566K11.5 | --     |
| ENSG00000261465 | -3.68859 | -2.060656 | 1 | 1 RP11-626G11.5 | --     |
| ENSG00000261469 | -3.68859 | -2.060656 | 1 | 1 RP11-96D1.6   | --     |
| ENSG00000261476 | -3.68859 | -2.060656 | 1 | 1 RP11-77K12.3  | --     |
| ENSG00000261481 | -3.68859 | -2.060656 | 1 | 1 RP11-77H9.6   | --     |
| ENSG00000261654 | -3.68859 | -2.060656 | 1 | 1 RP11-96K19.4  | --     |
| ENSG00000261783 | -3.68859 | -2.060656 | 1 | 1 RP11-252K23.2 | --     |
| ENSG00000261827 | -3.68859 | -2.060656 | 1 | 1 RP11-340F14.5 | --     |
| ENSG00000262165 | -3.68859 | -2.060656 | 1 | 1 RP11-81A22.5  | --     |
| ENSG00000262223 | -3.68859 | -2.060656 | 1 | 1 RP11-1055B8.3 | --     |
| ENSG00000262372 | -3.68859 | -2.060656 | 1 | 1 RP11-669E14.6 | --     |
| ENSG00000262583 | -3.68859 | -2.060656 | 1 | 1 RP11-77K12.5  | K19362 |
| ENSG00000262732 | -3.68859 | -2.060656 | 1 | 1 CTD-2135D7.2  | --     |
| ENSG00000263051 | -3.68859 | -2.060656 | 1 | 1 RP11-565F19.3 | --     |
| ENSG00000263220 | -3.68859 | -2.060656 | 1 | 1 RP11-420A6.2  | --     |
| ENSG00000263660 | -3.68859 | -2.060656 | 1 | 1 AC087793.1    | --     |
| ENSG00000263931 | -3.68859 | -2.060656 | 1 | 1 RP11-180P8.1  | --     |
| ENSG00000264067 | -3.68859 | -2.060656 | 1 | 1 RP11-401O9.3  | --     |
| ENSG00000264176 | -3.68859 | -2.060656 | 1 | 1 MAGOH2        | K12877 |
| ENSG00000264265 | -3.68859 | -2.060656 | 1 | 1 RP11-14P20.1  | --     |
| ENSG00000264324 | -3.68859 | -2.060656 | 1 | 1 RP11-287D1.3  | K13857 |
| ENSG00000264349 | -3.68859 | -2.060656 | 1 | 1 MIR4258       | --     |
| ENSG00000264508 | -3.68859 | -2.060656 | 1 | 1 RN7SL473P     | --     |
| ENSG00000264520 | -3.68859 | -2.060656 | 1 | 1 RP4-777O23.2  | --     |
| ENSG00000264812 | -3.68859 | -2.060656 | 1 | 1 RP13-20L14.4  | --     |
| ENSG00000264931 | -3.68859 | -2.060656 | 1 | 1 MIR3138       | --     |
| ENSG00000265321 | -3.68859 | -2.060656 | 1 | 1 MIR4263       | --     |
| ENSG00000265403 | -3.68859 | -2.060656 | 1 | 1 AC015884.1    | --     |
| ENSG00000265528 | -3.68859 | -2.060656 | 1 | 1 AC092316.2    | --     |
| ENSG00000265574 | -3.68859 | -2.060656 | 1 | 1 CTD-2095E4.1  | --     |
| ENSG00000265943 | -3.68859 | -2.060656 | 1 | 1 RP11-739L10.1 | --     |
| ENSG00000266098 | -3.68859 | -2.060656 | 1 | 1 AL137127.1    | --     |
| ENSG00000266126 | -3.68859 | -2.060656 | 1 | 1 RP11-209D14.4 | --     |
| ENSG00000266164 | -3.68859 | -2.060656 | 1 | 1 RN7SL758P     | --     |
| ENSG00000266542 | -3.68859 | -2.060656 | 1 | 1 MIR5572       | --     |
| ENSG00000266843 | -3.68859 | -2.060656 | 1 | 1 AL360007.1    | --     |
| ENSG00000266941 | -3.68859 | -2.060656 | 1 | 1 AC104532.3    | --     |
| ENSG00000266942 | -3.68859 | -2.060656 | 1 | 1 RP11-378E13.3 | --     |
| ENSG00000266980 | -3.68859 | -2.060656 | 1 | 1 RP11-552F3.4  | --     |
| ENSG00000267092 | -3.68859 | -2.060656 | 1 | 1 CTB-25B13.9   | --     |
| ENSG00000267117 | -3.68859 | -2.060656 | 1 | 1 AC010525.4    | --     |
| ENSG00000267302 | -3.68859 | -2.060656 | 1 | 1 RP11-178C3.2  | --     |
| ENSG00000267385 | -3.68859 | -2.060656 | 1 | 1 CTB-50L17.14  | K04613 |



|                 |          |           |   |                  |        |
|-----------------|----------|-----------|---|------------------|--------|
| ENSG00000267470 | -3.68859 | -2.060656 | 1 | 1 ZNF571-AS1     | --     |
| ENSG00000267476 | -3.68859 | -2.060656 | 1 | 1 RP11-126O1.4   | --     |
| ENSG00000267551 | -3.68859 | -2.060656 | 1 | 1 AC005264.2     | --     |
| ENSG00000267605 | -3.68859 | -2.060656 | 1 | 1 CTD-3220F14.1  | --     |
| ENSG00000267654 | -3.68859 | -2.060656 | 1 | 1 RP11-973H7.4   | --     |
| ENSG00000267711 | -3.68859 | -2.060656 | 1 | 1 RP11-686D22.5  | --     |
| ENSG00000267852 | -3.68859 | -2.060656 | 1 | 1 CTB-133G6.2    | --     |
| ENSG00000267868 | -3.68859 | -2.060656 | 1 | 1 RP11-120K24.3  | --     |
| ENSG00000267874 | -3.68859 | -2.060656 | 1 | 1 CTD-2527I21.9  | --     |
| ENSG00000267934 | -3.68859 | -2.060656 | 1 | 1 CTB-176F20.3   | --     |
| ENSG00000268173 | -3.68859 | -2.060656 | 1 | 1 PIK3R2         | K02649 |
| ENSG00000268302 | -3.68859 | -2.060656 | 1 | 1 AL035252.1     | --     |
| ENSG00000268466 | -3.68859 | -2.060656 | 1 | 1 AL132989.1     | --     |
| ENSG00000268550 | -3.68859 | -2.060656 | 1 | 1 AC090427.1     | --     |
| ENSG00000268751 | -3.68859 | -2.060656 | 1 | 1 SCGB1B2P       | --     |
| ENSG00000268788 | -3.68859 | -2.060656 | 1 | 1 AC110615.1     | K14856 |
| ENSG00000268838 | -3.68859 | -2.060656 | 1 | 1 AC027228.1     | --     |
| ENSG00000269097 | -3.68859 | -2.060656 | 1 | 1 AC003682.17    | --     |
| ENSG00000269153 | -3.68859 | -2.060656 | 1 | 1 CTD-3193O13.10 | K06130 |
| ENSG00000269431 | -3.68859 | -2.060656 | 1 | 1 CTB-175P5.1    | K15464 |
| ENSG00000269534 | -3.68859 | -2.060656 | 1 | 1 CTC-453G23.5   | --     |
| ENSG00000269652 | -3.68859 | -2.060656 | 1 | 1 CTD-2195B23.3  | --     |
| ENSG00000269890 | -3.68859 | -2.060656 | 1 | 1 RP5-1139B12.2  | --     |
| ENSG00000269919 | -3.68859 | -2.060656 | 1 | 1 RP1-134E15.3   | --     |
| ENSG00000269938 | -3.68859 | -2.060656 | 1 | 1 RP11-214K3.20  | --     |
| ENSG00000270127 | -3.68859 | -2.060656 | 1 | 1 RP11-526I2.5   | --     |
| ENSG00000270154 | -3.68859 | -2.060656 | 1 | 1 RP11-419I17.1  | --     |
| ENSG00000270540 | -3.68859 | -2.060656 | 1 | 1 RP11-785G17.1  | --     |
| ENSG00000270554 | -3.68859 | -2.060656 | 1 | 1 RP11-225N10.3  | --     |
| ENSG00000270772 | -3.68859 | -2.060656 | 1 | 1 RP11-332H21.2  | K00161 |
| ENSG00000270911 | -3.68859 | -2.060656 | 1 | 1 RP11-272L13.4  | --     |
| ENSG00000270917 | -3.68859 | -2.060656 | 1 | 1 RP11-27I1.6    | --     |
| ENSG00000270951 | -3.68859 | -2.060656 | 1 | 1 RP1-309F20.4   | --     |
| ENSG00000271011 | -3.68859 | -2.060656 | 1 | 1 RP11-171I2.5   | --     |
| ENSG00000271018 | -3.68859 | -2.060656 | 1 | 1 RP11-60E8.2    | K17784 |
| ENSG00000271237 | -3.68859 | -2.060656 | 1 | 1 RP11-140C5.3   | --     |
| ENSG00000271324 | -3.68859 | -2.060656 | 1 | 1 RP11-10C24.2   | --     |
| ENSG00000271387 | -3.68859 | -2.060656 | 1 | 1 RP11-382D12.2  | --     |
| ENSG00000271557 | -3.68859 | -2.060656 | 1 | 1 RP11-692M12.4  | --     |
| ENSG00000271806 | -3.68859 | -2.060656 | 1 | 1 RP5-892K4.1    | --     |
| ENSG00000271849 | -3.68859 | -2.060656 | 1 | 1 CTC-332L22.1   | --     |
| ENSG00000271924 | -3.68859 | -2.060656 | 1 | 1 5S_rRNA        | --     |
| ENSG00000271926 | -3.68859 | -2.060656 | 1 | 1 CTD-2376I4.1   | --     |
| ENSG00000271970 | -3.68859 | -2.060656 | 1 | 1 RP3-337H4.10   | --     |
| ENSG00000271973 | -3.68859 | -2.060656 | 1 | 1 RP11-572O6.1   | --     |
| ENSG00000272248 | -3.68859 | -2.060656 | 1 | 1 RP3-406P24.4   | --     |
| ENSG00000272334 | -3.68859 | -2.060656 | 1 | 1 RP11-129K12.1  | --     |
| ENSG00000272366 | -3.68859 | -2.060656 | 1 | 1 RP11-573G6.10  | --     |
| ENSG00000272389 | -3.68859 | -2.060656 | 1 | 1 CTC-487M23.7   | --     |
| ENSG00000272507 | -3.68859 | -2.060656 | 1 | 1 U6             | --     |
| ENSG00000272562 | -3.68859 | -2.060656 | 1 | 1 RP11-396C23.4  | --     |
| ENSG00000272582 | -3.68859 | -2.060656 | 1 | 1 RP5-1039K5.17  | --     |
| ENSG00000272589 | -3.68859 | -2.060656 | 1 | 1 ZSWIM8-AS1     | --     |
| ENSG00000272810 | -3.68859 | -2.060656 | 1 | 1 U91328.22      | --     |
| ENSG00000272817 | -3.68859 | -2.060656 | 1 | 1 RP11-402D21.2  | --     |
| ENSG00000272828 | -3.68859 | -2.060656 | 1 | 1 CTD-2555O16.3  | --     |
| ENSG00000273062 | -3.68859 | -2.060656 | 1 | 1 RP11-428K3.1   | --     |
| ENSG00000273096 | -3.68859 | -2.060656 | 1 | 1 RP3-508I15.20  | --     |

|                 |           |           |   |                 |        |
|-----------------|-----------|-----------|---|-----------------|--------|
| ENSG00000273309 | -3.68859  | -2.060656 | 1 | 1 AC004410.3    | -      |
| ENSG00000273367 | -3.68859  | -2.060656 | 1 | 1 RP5-827C21.6  | -      |
| ENSG00000273398 | -3.68859  | -2.060656 | 1 | 1 RP11-474G23.1 | K06268 |
| ENSG00000273450 | -3.68859  | -2.060656 | 1 | 1 RP11-76P2.4   | -      |
| ENSG00000273492 | -3.68859  | -2.060656 | 1 | 1 AP000230.1    | -      |
| ENSG00000004809 | -2.796355 | -2.316672 | 1 | 1 SLC22A16      | K08212 |
| ENSG00000006075 | -2.796355 | -2.316672 | 1 | 1 CCL3          | K05408 |
| ENSG00000008056 | -2.796355 | -2.316672 | 1 | 1 SYN1          | -      |
| ENSG00000009694 | -2.796355 | -2.316672 | 1 | 1 TENM1         | -      |
| ENSG00000009765 | -2.796355 | -2.316672 | 1 | 1 IYD           | K17231 |
| ENSG00000010379 | -2.796355 | -2.316672 | 1 | 1 SLC6A13       | K05039 |
| ENSG00000018625 | -2.796355 | -2.316672 | 1 | 1 ATP1A2        | K01539 |
| ENSG00000019102 | -2.796355 | -2.316672 | 1 | 1 VSIG2         | -      |
| ENSG00000019505 | -2.796355 | -2.316672 | 1 | 1 SYT13         | K12022 |
| ENSG00000023902 | -2.796355 | -2.316672 | 1 | 1 PLEKHO1       | -      |
| ENSG00000026652 | -2.796355 | -2.316672 | 1 | 1 AGPAT4        | K13523 |
| ENSG00000042832 | -2.796355 | -2.316672 | 1 | 1 TG            | K10809 |
| ENSG00000042980 | -2.796355 | -2.316672 | 1 | 1 ADAM28        | K08614 |
| ENSG00000049769 | -2.796355 | -2.316672 | 1 | 1 PPP1R3F       | K17453 |
| ENSG00000064989 | -2.796355 | -2.316672 | 1 | 1 CALCRL        | -      |
| ENSG00000067191 | -2.796355 | -2.316672 | 1 | 1 CACNB1        | K04862 |
| ENSG00000069493 | -2.796355 | -2.316672 | 1 | 1 CLEC2D        | K10072 |
| ENSG00000070526 | -2.796355 | -2.316672 | 1 | 1 ST6GALNAC1    | K03479 |
| ENSG00000071051 | -2.796355 | -2.316672 | 1 | 1 NCK2          | K07365 |
| ENSG00000072609 | -2.796355 | -2.316672 | 1 | 1 CHFR          | K11447 |
| ENSG00000072858 | -2.796355 | -2.316672 | 1 | 1 SIDT1         | -      |
| ENSG00000073146 | -2.796355 | -2.316672 | 1 | 1 MOV10L1       | K13983 |
| ENSG00000073598 | -2.796355 | -2.316672 | 1 | 1 FNDC8         | -      |
| ENSG00000077063 | -2.796355 | -2.316672 | 1 | 1 CTTNBP2       | -      |
| ENSG00000077080 | -2.796355 | -2.316672 | 1 | 1 ACTL6B        | K11652 |
| ENSG00000080166 | -2.796355 | -2.316672 | 1 | 1 DCT           | K01827 |
| ENSG00000081853 | -2.796355 | -2.316672 | 1 | 1 PCDHGA2       | K16495 |
| ENSG00000082126 | -2.796355 | -2.316672 | 1 | 1 MPP4          | -      |
| ENSG00000082293 | -2.796355 | -2.316672 | 1 | 1 COL19A1       | -      |
| ENSG00000083307 | -2.796355 | -2.316672 | 1 | 1 GRHL2         | K09275 |
| ENSG00000087245 | -2.796355 | -2.316672 | 1 | 1 MMP2          | K01398 |
| ENSG00000087589 | -2.796355 | -2.316672 | 1 | 1 CASS4         | -      |
| ENSG00000089101 | -2.796355 | -2.316672 | 1 | 1 C20orf26      | K12869 |
| ENSG00000090376 | -2.796355 | -2.316672 | 1 | 1 IRAK3         | K04732 |
| ENSG00000091972 | -2.796355 | -2.316672 | 1 | 1 CD200         | K06556 |
| ENSG00000092067 | -2.796355 | -2.316672 | 1 | 1 CEBPE         | K10051 |
| ENSG00000092850 | -2.796355 | -2.316672 | 1 | 1 TEK2          | K18629 |
| ENSG00000093134 | -2.796355 | -2.316672 | 1 | 1 VNN3          | K08069 |
| ENSG00000095587 | -2.796355 | -2.316672 | 1 | 1 TLL2          | K13047 |
| ENSG00000095596 | -2.796355 | -2.316672 | 1 | 1 CYP26A1       | K07437 |
| ENSG00000100197 | -2.796355 | -2.316672 | 1 | 1 CYP2D6        | K17712 |
| ENSG00000100351 | -2.796355 | -2.316672 | 1 | 1 GRAP2         | K07366 |
| ENSG00000100368 | -2.796355 | -2.316672 | 1 | 1 CSF2RB        | K04738 |
| ENSG00000100505 | -2.796355 | -2.316672 | 1 | 1 TRIM9         | K10649 |
| ENSG00000100842 | -2.796355 | -2.316672 | 1 | 1 EFS           | -      |
| ENSG00000101638 | -2.796355 | -2.316672 | 1 | 1 ST8SIA5       | K03369 |
| ENSG00000101890 | -2.796355 | -2.316672 | 1 | 1 GUCY2F        | K12321 |
| ENSG00000101916 | -2.796355 | -2.316672 | 1 | 1 TLR8          | K10170 |
| ENSG00000102010 | -2.796355 | -2.316672 | 1 | 1 BMX           | K08896 |
| ENSG00000102104 | -2.796355 | -2.316672 | 1 | 1 RS1           | K08824 |
| ENSG00000102119 | -2.796355 | -2.316672 | 1 | 1 EMD           | K12569 |
| ENSG00000102539 | -2.796355 | -2.316672 | 1 | 1 MLNR          | K05266 |
| ENSG00000102970 | -2.796355 | -2.316672 | 1 | 1 CCL17         | K05514 |

|                 |           |           |   |              |        |
|-----------------|-----------|-----------|---|--------------|--------|
| ENSG00000103241 | -2.796355 | -2.316672 | 1 | 1 FOXF1      | K09399 |
| ENSG00000103522 | -2.796355 | -2.316672 | 1 | 1 IL21R      | K05075 |
| ENSG00000104177 | -2.796355 | -2.316672 | 1 | 1 MYEF2      | K13753 |
| ENSG00000104321 | -2.796355 | -2.316672 | 1 | 1 TRPA1      | K04984 |
| ENSG00000104941 | -2.796355 | -2.316672 | 1 | 1 RSPH6A     | -      |
| ENSG00000105122 | -2.796355 | -2.316672 | 1 | 1 RASAL3     | K17634 |
| ENSG00000105278 | -2.796355 | -2.316672 | 1 | 1 ZFR2       | -      |
| ENSG00000105366 | -2.796355 | -2.316672 | 1 | 1 SIGLEC8    | K06748 |
| ENSG00000105370 | -2.796355 | -2.316672 | 1 | 1 LIM2       | -      |
| ENSG00000105509 | -2.796355 | -2.316672 | 1 | 1 HAS1       | K00752 |
| ENSG00000105664 | -2.796355 | -2.316672 | 1 | 1 COMP       | K04659 |
| ENSG00000105697 | -2.796355 | -2.316672 | 1 | 1 HAMP       | -      |
| ENSG00000105988 | -2.796355 | -2.316672 | 1 | 1 NHP2P1     | K11129 |
| ENSG00000106436 | -2.796355 | -2.316672 | 1 | 1 MYL10      | K12756 |
| ENSG00000106686 | -2.796355 | -2.316672 | 1 | 1 SPATA6L    | -      |
| ENSG00000108849 | -2.796355 | -2.316672 | 1 | 1 PPY        | K05234 |
| ENSG00000109084 | -2.796355 | -2.316672 | 1 | 1 TMEM97     | K04264 |
| ENSG00000109610 | -2.796355 | -2.316672 | 1 | 1 SOD3       | K16627 |
| ENSG00000110243 | -2.796355 | -2.316672 | 1 | 1 APOA5      | K09025 |
| ENSG00000110455 | -2.796355 | -2.316672 | 1 | 1 ACCS       | -      |
| ENSG00000110887 | -2.796355 | -2.316672 | 1 | 1 DAO        | K00273 |
| ENSG00000111254 | -2.796355 | -2.316672 | 1 | 1 AKAP3      | -      |
| ENSG00000111676 | -2.796355 | -2.316672 | 1 | 1 ATN1       | K05626 |
| ENSG00000112183 | -2.796355 | -2.316672 | 1 | 1 RBM24      | -      |
| ENSG00000112212 | -2.796355 | -2.316672 | 1 | 1 TSPO2      | -      |
| ENSG00000112246 | -2.796355 | -2.316672 | 1 | 1 SIM1       | K09100 |
| ENSG00000112303 | -2.796355 | -2.316672 | 1 | 1 VNN2       | K08069 |
| ENSG00000112619 | -2.796355 | -2.316672 | 1 | 1 PRPH2      | K17343 |
| ENSG00000113100 | -2.796355 | -2.316672 | 1 | 1 CDH9       | K06801 |
| ENSG00000113520 | -2.796355 | -2.316672 | 1 | 1 IL4        | K05430 |
| ENSG00000113657 | -2.796355 | -2.316672 | 1 | 1 DPYSL3     | K07528 |
| ENSG00000113889 | -2.796355 | -2.316672 | 1 | 1 KNG1       | K03898 |
| ENSG00000114812 | -2.796355 | -2.316672 | 1 | 1 VIPR1      | -      |
| ENSG00000115112 | -2.796355 | -2.316672 | 1 | 1 TFCP2L1    | K09275 |
| ENSG00000115297 | -2.796355 | -2.316672 | 1 | 1 TLX2       | K15606 |
| ENSG00000115353 | -2.796355 | -2.316672 | 1 | 1 TACR1      | K04222 |
| ENSG00000115705 | -2.796355 | -2.316672 | 1 | 1 TPO        | K00431 |
| ENSG00000116521 | -2.796355 | -2.316672 | 1 | 1 SCAMP3     | -      |
| ENSG00000116785 | -2.796355 | -2.316672 | 1 | 1 CFHR3      | K04004 |
| ENSG00000117114 | -2.796355 | -2.316672 | 1 | 1 LPHN2      | K04593 |
| ENSG00000118156 | -2.796355 | -2.316672 | 1 | 1 ZNF541     | -      |
| ENSG00000118292 | -2.796355 | -2.316672 | 1 | 1 C1orf54    | -      |
| ENSG00000118526 | -2.796355 | -2.316672 | 1 | 1 TCF21      | K09072 |
| ENSG00000119411 | -2.796355 | -2.316672 | 1 | 1 BSPRY      | -      |
| ENSG00000120215 | -2.796355 | -2.316672 | 1 | 1 MLANA      | K17303 |
| ENSG00000120242 | -2.796355 | -2.316672 | 1 | 1 IFNA8      | K05414 |
| ENSG00000120937 | -2.796355 | -2.316672 | 1 | 1 NPPB       | K12335 |
| ENSG00000121898 | -2.796355 | -2.316672 | 1 | 1 CPXM2      | K08639 |
| ENSG00000122787 | -2.796355 | -2.316672 | 1 | 1 AKR1D1     | K00251 |
| ENSG00000123453 | -2.796355 | -2.316672 | 1 | 1 SARDH      | K00314 |
| ENSG00000123892 | -2.796355 | -2.316672 | 1 | 1 RAB38      | K07923 |
| ENSG00000124092 | -2.796355 | -2.316672 | 1 | 1 CTCFL      | K11447 |
| ENSG00000124205 | -2.796355 | -2.316672 | 1 | 1 EDN3       | K05227 |
| ENSG00000124491 | -2.796355 | -2.316672 | 1 | 1 F13A1      | K03917 |
| ENSG00000124835 | -2.796355 | -2.316672 | 1 | 1 AC105760.3 | -      |
| ENSG00000125207 | -2.796355 | -2.316672 | 1 | 1 PIWIL1     | K02156 |
| ENSG00000125675 | -2.796355 | -2.316672 | 1 | 1 GRIA3      | K05199 |
| ENSG00000125787 | -2.796355 | -2.316672 | 1 | 1 GNRH2      | K05252 |

|                 |           |           |   |                |        |
|-----------------|-----------|-----------|---|----------------|--------|
| ENSG00000126010 | -2.796355 | -2.316672 | 1 | 1 GRPR         | K04169 |
| ENSG00000126895 | -2.796355 | -2.316672 | 1 | 1 AVPR2        | K04228 |
| ENSG00000126950 | -2.796355 | -2.316672 | 1 | 1 TMEM35       | -      |
| ENSG00000127249 | -2.796355 | -2.316672 | 1 | 1 ATP13A4      | K14951 |
| ENSG00000128254 | -2.796355 | -2.316672 | 1 | 1 C22orf24     | -      |
| ENSG00000128276 | -2.796355 | -2.316672 | 1 | 1 RFPL3        | -      |
| ENSG00000128285 | -2.796355 | -2.316672 | 1 | 1 MCHR1        | K04320 |
| ENSG00000128313 | -2.796355 | -2.316672 | 1 | 1 APOL5        | K14480 |
| ENSG00000128849 | -2.796355 | -2.316672 | 1 | 1 CGNL1        | -      |
| ENSG00000129151 | -2.796355 | -2.316672 | 1 | 1 BBOX1        | -      |
| ENSG00000130173 | -2.796355 | -2.316672 | 1 | 1 C19orf80     | -      |
| ENSG00000130592 | -2.796355 | -2.316672 | 1 | 1 LSP1         | K14957 |
| ENSG00000130957 | -2.796355 | -2.316672 | 1 | 1 FBP2         | K03841 |
| ENSG00000131015 | -2.796355 | -2.316672 | 1 | 1 ULBP2        | K07986 |
| ENSG00000131096 | -2.796355 | -2.316672 | 1 | 1 PYY          | K05233 |
| ENSG00000131355 | -2.796355 | -2.316672 | 1 | 1 EMR3         | K08444 |
| ENSG00000131386 | -2.796355 | -2.316672 | 1 | 1 GALNT15      | K00710 |
| ENSG00000131435 | -2.796355 | -2.316672 | 1 | 1 PDLIM4       | -      |
| ENSG00000131484 | -2.796355 | -2.316672 | 1 | 1 RP11-798G7.5 | -      |
| ENSG00000131771 | -2.796355 | -2.316672 | 1 | 1 PPP1R1B      | K15494 |
| ENSG00000132911 | -2.796355 | -2.316672 | 1 | 1 NMUR2        | K05053 |
| ENSG00000133256 | -2.796355 | -2.316672 | 1 | 1 PDE6B        | K13756 |
| ENSG00000133636 | -2.796355 | -2.316672 | 1 | 1 NTS          | K05235 |
| ENSG00000133962 | -2.796355 | -2.316672 | 1 | 1 CATSPERB     | K16893 |
| ENSG00000134072 | -2.796355 | -2.316672 | 1 | 1 CAMK1        | K08794 |
| ENSG00000134198 | -2.796355 | -2.316672 | 1 | 1 TSPAN2       | K17354 |
| ENSG00000134326 | -2.796355 | -2.316672 | 1 | 1 CMPK2        | K13809 |
| ENSG00000134817 | -2.796355 | -2.316672 | 1 | 1 APLNR        | K04174 |
| ENSG00000135077 | -2.796355 | -2.316672 | 1 | 1 HAVCR2       | -      |
| ENSG00000135175 | -2.796355 | -2.316672 | 1 | 1 OCM2         | -      |
| ENSG00000135443 | -2.796355 | -2.316672 | 1 | 1 KRT85        | K07605 |
| ENSG00000135472 | -2.796355 | -2.316672 | 1 | 1 FAIM2        | -      |
| ENSG00000135625 | -2.796355 | -2.316672 | 1 | 1 EGR4         | K12498 |
| ENSG00000136014 | -2.796355 | -2.316672 | 1 | 1 USP44        | K11834 |
| ENSG00000136267 | -2.796355 | -2.316672 | 1 | 1 DGKB         | K00901 |
| ENSG00000136574 | -2.796355 | -2.316672 | 1 | 1 GATA4        | K09183 |
| ENSG00000137033 | -2.796355 | -2.316672 | 1 | 1 IL33         | K12967 |
| ENSG00000138028 | -2.796355 | -2.316672 | 1 | 1 CGREF1       | K00846 |
| ENSG00000138075 | -2.796355 | -2.316672 | 1 | 1 ABCG5        | K05683 |
| ENSG00000138400 | -2.796355 | -2.316672 | 1 | 1 MDH1B        | K15048 |
| ENSG00000138483 | -2.796355 | -2.316672 | 1 | 1 CCDC54       | -      |
| ENSG00000138823 | -2.796355 | -2.316672 | 1 | 1 MTTP         | K14463 |
| ENSG00000138892 | -2.796355 | -2.316672 | 1 | 1 TTLL8        | K16608 |
| ENSG00000139508 | -2.796355 | -2.316672 | 1 | 1 SLC46A3      | K14613 |
| ENSG00000139549 | -2.796355 | -2.316672 | 1 | 1 DHH          | K11990 |
| ENSG00000139572 | -2.796355 | -2.316672 | 1 | 1 GPR84        | K08421 |
| ENSG00000139973 | -2.796355 | -2.316672 | 1 | 1 SYT16        | K19328 |
| ENSG00000140368 | -2.796355 | -2.316672 | 1 | 1 PSTPIP1      | K12804 |
| ENSG00000140527 | -2.796355 | -2.316672 | 1 | 1 WDR93        | K12581 |
| ENSG00000140749 | -2.796355 | -2.316672 | 1 | 1 IGSF6        | K11447 |
| ENSG00000140839 | -2.796355 | -2.316672 | 1 | 1 CLEC18B      | -      |
| ENSG00000141434 | -2.796355 | -2.316672 | 1 | 1 MEP1B        | K08606 |
| ENSG00000141748 | -2.796355 | -2.316672 | 1 | 1 ARL5C        | K07960 |
| ENSG00000141756 | -2.796355 | -2.316672 | 1 | 1 FKBP10       | K09575 |
| ENSG00000142405 | -2.796355 | -2.316672 | 1 | 1 NLRP12       | K01353 |
| ENSG00000142583 | -2.796355 | -2.316672 | 1 | 1 SLC2A5       | K08143 |
| ENSG00000143185 | -2.796355 | -2.316672 | 1 | 1 XCL2         | K05507 |
| ENSG00000143603 | -2.796355 | -2.316672 | 1 | 1 KCNN3        | K04944 |

|                 |           |           |   |                |        |
|-----------------|-----------|-----------|---|----------------|--------|
| ENSG00000144229 | -2.796355 | -2.316672 | 1 | 1 THSD7B       | -      |
| ENSG00000144671 | -2.796355 | -2.316672 | 1 | 1 SLC22A14     | K08210 |
| ENSG00000144771 | -2.796355 | -2.316672 | 1 | 1 LRTM1        | -      |
| ENSG00000144792 | -2.796355 | -2.316672 | 1 | 1 ZNF660       | -      |
| ENSG00000144852 | -2.796355 | -2.316672 | 1 | 1 NR1I2        | K08540 |
| ENSG00000144893 | -2.796355 | -2.316672 | 1 | 1 MED12L       | K15162 |
| ENSG00000145050 | -2.796355 | -2.316672 | 1 | 1 MANF         | -      |
| ENSG00000145681 | -2.796355 | -2.316672 | 1 | 1 HAPLN1       | K06848 |
| ENSG00000145879 | -2.796355 | -2.316672 | 1 | 1 SPINK7       | -      |
| ENSG00000145936 | -2.796355 | -2.316672 | 1 | 1 KCNMB1       | K04937 |
| ENSG00000146216 | -2.796355 | -2.316672 | 1 | 1 TTBK1        | K08815 |
| ENSG00000146276 | -2.796355 | -2.316672 | 1 | 1 GABRR1       | K05190 |
| ENSG00000146839 | -2.796355 | -2.316672 | 1 | 1 ZAN          | -      |
| ENSG00000146955 | -2.796355 | -2.316672 | 1 | 1 RAB19        | K17047 |
| ENSG00000147082 | -2.796355 | -2.316672 | 1 | 1 CCNB3        | K05868 |
| ENSG00000147183 | -2.796355 | -2.316672 | 1 | 1 CPXCR1       | -      |
| ENSG00000147206 | -2.796355 | -2.316672 | 1 | 1 NXF3         | K14284 |
| ENSG00000147402 | -2.796355 | -2.316672 | 1 | 1 GABRQ        | K05192 |
| ENSG00000147588 | -2.796355 | -2.316672 | 1 | 1 PMP2         | K08753 |
| ENSG00000147614 | -2.796355 | -2.316672 | 1 | 1 ATP6V0D2     | K02146 |
| ENSG00000147724 | -2.796355 | -2.316672 | 1 | 1 FAM135B      | -      |
| ENSG00000148377 | -2.796355 | -2.316672 | 1 | 1 IDI2         | K01823 |
| ENSG00000148735 | -2.796355 | -2.316672 | 1 | 1 PLEKHS1      | -      |
| ENSG00000149428 | -2.796355 | -2.316672 | 1 | 1 HYOU1        | K09486 |
| ENSG00000149506 | -2.796355 | -2.316672 | 1 | 1 ZP1          | -      |
| ENSG00000149599 | -2.796355 | -2.316672 | 1 | 1 DUSP15       | K14165 |
| ENSG00000150676 | -2.796355 | -2.316672 | 1 | 1 CCDC83       | -      |
| ENSG00000150681 | -2.796355 | -2.316672 | 1 | 1 RGS18        | K16449 |
| ENSG00000151240 | -2.796355 | -2.316672 | 1 | 1 DIP2C        | K09228 |
| ENSG00000151303 | -2.796355 | -2.316672 | 1 | 1 AGAP11       | -      |
| ENSG00000151617 | -2.796355 | -2.316672 | 1 | 1 EDNRA        | K04197 |
| ENSG00000151640 | -2.796355 | -2.316672 | 1 | 1 DPYSL4       | K07528 |
| ENSG00000151963 | -2.796355 | -2.316672 | 1 | 1 RP11-775A3.1 | K09228 |
| ENSG00000152766 | -2.796355 | -2.316672 | 1 | 1 ANKRD22      | -      |
| ENSG00000152822 | -2.796355 | -2.316672 | 1 | 1 GRM1         | K04603 |
| ENSG00000153976 | -2.796355 | -2.316672 | 1 | 1 HS3ST3A1     | K07809 |
| ENSG00000154016 | -2.796355 | -2.316672 | 1 | 1 GRAP         | K04364 |
| ENSG00000154118 | -2.796355 | -2.316672 | 1 | 1 JPH3         | K19530 |
| ENSG00000154134 | -2.796355 | -2.316672 | 1 | 1 ROBO3        | K06755 |
| ENSG00000154277 | -2.796355 | -2.316672 | 1 | 1 UCHL1        | K05611 |
| ENSG00000155099 | -2.796355 | -2.316672 | 1 | 1 TMEM55A      | K13084 |
| ENSG00000155749 | -2.796355 | -2.316672 | 1 | 1 ALS2CR12     | -      |
| ENSG00000156049 | -2.796355 | -2.316672 | 1 | 1 GNA14        | K04636 |
| ENSG00000156219 | -2.796355 | -2.316672 | 1 | 1 ART3         | K00775 |
| ENSG00000156299 | -2.796355 | -2.316672 | 1 | 1 TIAM1        | K05731 |
| ENSG00000156427 | -2.796355 | -2.316672 | 1 | 1 FGF18        | K04358 |
| ENSG00000157005 | -2.796355 | -2.316672 | 1 | 1 SST          | K05237 |
| ENSG00000157423 | -2.796355 | -2.316672 | 1 | 1 HYDIN        | K17570 |
| ENSG00000157851 | -2.796355 | -2.316672 | 1 | 1 DPYSL5       | K07529 |
| ENSG00000157856 | -2.796355 | -2.316672 | 1 | 1 DRC1         | K19754 |
| ENSG00000158055 | -2.796355 | -2.316672 | 1 | 1 GRHL3        | K09275 |
| ENSG00000158525 | -2.796355 | -2.316672 | 1 | 1 CPA5         | K08781 |
| ENSG00000158560 | -2.796355 | -2.316672 | 1 | 1 DYNC1I1      | K10415 |
| ENSG00000158806 | -2.796355 | -2.316672 | 1 | 1 NPM2         | K11277 |
| ENSG00000158813 | -2.796355 | -2.316672 | 1 | 1 EDA          | K05480 |
| ENSG00000158865 | -2.796355 | -2.316672 | 1 | 1 SLC5A11      | K14391 |
| ENSG00000159212 | -2.796355 | -2.316672 | 1 | 1 CLIC6        | K05026 |
| ENSG00000159251 | -2.796355 | -2.316672 | 1 | 1 ACTC1        | K12314 |

|                 |           |           |   |             |        |
|-----------------|-----------|-----------|---|-------------|--------|
| ENSG00000159339 | -2.796355 | -2.316672 | 1 | 1 PADI4     | K01481 |
| ENSG00000159713 | -2.796355 | -2.316672 | 1 | 1 TPPP3     | -      |
| ENSG00000160181 | -2.796355 | -2.316672 | 1 | 1 TFF2      | -      |
| ENSG00000160188 | -2.796355 | -2.316672 | 1 | 1 RSPH1     | K19755 |
| ENSG00000160339 | -2.796355 | -2.316672 | 1 | 1 FCN2      | K10104 |
| ENSG00000160472 | -2.796355 | -2.316672 | 1 | 1 TMEM190   | -      |
| ENSG00000160886 | -2.796355 | -2.316672 | 1 | 1 LY6K      | -      |
| ENSG00000161133 | -2.796355 | -2.316672 | 1 | 1 USP41     | K11846 |
| ENSG00000162627 | -2.796355 | -2.316672 | 1 | 1 SNX7      | K17921 |
| ENSG00000162654 | -2.796355 | -2.316672 | 1 | 1 GBP4      | -      |
| ENSG00000162687 | -2.796355 | -2.316672 | 1 | 1 KCNT2     | K04947 |
| ENSG00000162836 | -2.796355 | -2.316672 | 1 | 1 ACP6      | K14395 |
| ENSG00000162897 | -2.796355 | -2.316672 | 1 | 1 FCAMR     | K16851 |
| ENSG00000163053 | -2.796355 | -2.316672 | 1 | 1 SLC16A14  | K08190 |
| ENSG00000163072 | -2.796355 | -2.316672 | 1 | 1 NOSTRIN   | -      |
| ENSG00000163216 | -2.796355 | -2.316672 | 1 | 1 SPRR2D    | -      |
| ENSG00000163221 | -2.796355 | -2.316672 | 1 | 1 S100A12   | -      |
| ENSG00000163359 | -2.796355 | -2.316672 | 1 | 1 COL6A3    | K06238 |
| ENSG00000163362 | -2.796355 | -2.316672 | 1 | 1 C1orf106  | -      |
| ENSG00000163380 | -2.796355 | -2.316672 | 1 | 1 LMOD3     | K12581 |
| ENSG00000163762 | -2.796355 | -2.316672 | 1 | 1 TM4SF18   | -      |
| ENSG00000163814 | -2.796355 | -2.316672 | 1 | 1 CDCP1     | K06732 |
| ENSG00000164049 | -2.796355 | -2.316672 | 1 | 1 FBXW12    | K10267 |
| ENSG00000164076 | -2.796355 | -2.316672 | 1 | 1 CAMKV     | K08812 |
| ENSG00000164181 | -2.796355 | -2.316672 | 1 | 1 ELOVL7    | K10250 |
| ENSG00000164185 | -2.796355 | -2.316672 | 1 | 1 ZNF474    | -      |
| ENSG00000164659 | -2.796355 | -2.316672 | 1 | 1 KIAA1324L | -      |
| ENSG00000164691 | -2.796355 | -2.316672 | 1 | 1 TAGAP     | -      |
| ENSG00000164741 | -2.796355 | -2.316672 | 1 | 1 DLC1      | -      |
| ENSG00000164749 | -2.796355 | -2.316672 | 1 | 1 HNF4G     | K08037 |
| ENSG00000164761 | -2.796355 | -2.316672 | 1 | 1 TNFRSF11B | K05148 |
| ENSG00000165120 | -2.796355 | -2.316672 | 1 | 1 SSMEM1    | -      |
| ENSG00000165125 | -2.796355 | -2.316672 | 1 | 1 TRPV6     | K04975 |
| ENSG00000165194 | -2.796355 | -2.316672 | 1 | 1 PCDH19    | K16499 |
| ENSG00000165325 | -2.796355 | -2.316672 | 1 | 1 CCDC67    | -      |
| ENSG00000165548 | -2.796355 | -2.316672 | 1 | 1 TMEM63C   | -      |
| ENSG00000165702 | -2.796355 | -2.316672 | 1 | 1 GFI1B     | K09223 |
| ENSG00000165923 | -2.796355 | -2.316672 | 1 | 1 AGBL2     | -      |
| ENSG00000165966 | -2.796355 | -2.316672 | 1 | 1 PDZRN4    | K15682 |
| ENSG00000166143 | -2.796355 | -2.316672 | 1 | 1 PPP1R14D  | K17557 |
| ENSG00000166159 | -2.796355 | -2.316672 | 1 | 1 LRTM2     | -      |
| ENSG00000166341 | -2.796355 | -2.316672 | 1 | 1 DCHS1     | K16507 |
| ENSG00000166349 | -2.796355 | -2.316672 | 1 | 1 RAG1      | K10628 |
| ENSG00000166428 | -2.796355 | -2.316672 | 1 | 1 PLD4      | K16860 |
| ENSG00000166670 | -2.796355 | -2.316672 | 1 | 1 MMP10     | K01396 |
| ENSG00000167034 | -2.796355 | -2.316672 | 1 | 1 NKX3-1    | K09348 |
| ENSG00000167083 | -2.796355 | -2.316672 | 1 | 1 GNGT2     | K04549 |
| ENSG00000167100 | -2.796355 | -2.316672 | 1 | 1 SAMD14    | K17551 |
| ENSG00000167131 | -2.796355 | -2.316672 | 1 | 1 CCDC103   | -      |
| ENSG00000167230 | -2.796355 | -2.316672 | 1 | 1 C17orf78  | -      |
| ENSG00000167332 | -2.796355 | -2.316672 | 1 | 1 OR51E2    | K04257 |
| ENSG00000167531 | -2.796355 | -2.316672 | 1 | 1 LALBA     | K00704 |
| ENSG00000167617 | -2.796355 | -2.316672 | 1 | 1 CDC42EP5  | -      |
| ENSG00000167723 | -2.796355 | -2.316672 | 1 | 1 TRPV3     | K04972 |
| ENSG00000168242 | -2.796355 | -2.316672 | 1 | 1 HIST1H2BI | K11252 |
| ENSG00000168243 | -2.796355 | -2.316672 | 1 | 1 GNG4      | K04541 |
| ENSG00000168843 | -2.796355 | -2.316672 | 1 | 1 FSTL5     | K06826 |
| ENSG00000169508 | -2.796355 | -2.316672 | 1 | 1 GPR183    | K04305 |

|                 |           |           |   |                 |        |
|-----------------|-----------|-----------|---|-----------------|--------|
| ENSG00000169777 | -2.796355 | -2.316672 | 1 | 1 TAS2R1        | K08474 |
| ENSG00000170454 | -2.796355 | -2.316672 | 1 | 1 KRT75         | K07605 |
| ENSG00000170477 | -2.796355 | -2.316672 | 1 | 1 KRT4          | K07605 |
| ENSG00000170927 | -2.796355 | -2.316672 | 1 | 1 PKHD1         | -      |
| ENSG00000170935 | -2.796355 | -2.316672 | 1 | 1 NCBP2L        | K12883 |
| ENSG00000171291 | -2.796355 | -2.316672 | 1 | 1 ZNF439        | K09228 |
| ENSG00000171357 | -2.796355 | -2.316672 | 1 | 1 LURAP1        | K12479 |
| ENSG00000171451 | -2.796355 | -2.316672 | 1 | 1 DSEL          | K17985 |
| ENSG00000171532 | -2.796355 | -2.316672 | 1 | 1 NEUROD2       | K09078 |
| ENSG00000171570 | -2.796355 | -2.316672 | 1 | 1 RAB4B-EGLN2   | K09592 |
| ENSG00000171659 | -2.796355 | -2.316672 | 1 | 1 GPR34         | K08383 |
| ENSG00000171847 | -2.796355 | -2.316672 | 1 | 1 FAM90A1       | -      |
| ENSG00000173262 | -2.796355 | -2.316672 | 1 | 1 SLC2A14       | K08142 |
| ENSG00000173728 | -2.796355 | -2.316672 | 1 | 1 C1orf100      | -      |
| ENSG00000174498 | -2.796355 | -2.316672 | 1 | 1 IGDCC3        | -      |
| ENSG00000174640 | -2.796355 | -2.316672 | 1 | 1 SLCO2A1       | K14345 |
| ENSG00000174715 | -2.796355 | -2.316672 | 1 | 1 RP11-79L9.2   | K03767 |
| ENSG00000175121 | -2.796355 | -2.316672 | 1 | 1 WFDC5         | -      |
| ENSG00000175749 | -2.796355 | -2.316672 | 1 | 1 EIF3KP1       | K15028 |
| ENSG00000175841 | -2.796355 | -2.316672 | 1 | 1 FAM172BP      | K02927 |
| ENSG00000176153 | -2.796355 | -2.316672 | 1 | 1 GPX2          | K00432 |
| ENSG00000176354 | -2.796355 | -2.316672 | 1 | 1 AC097359.1    | -      |
| ENSG00000176406 | -2.796355 | -2.316672 | 1 | 1 RIMS2         | K15297 |
| ENSG00000176571 | -2.796355 | -2.316672 | 1 | 1 CNBD1         | -      |
| ENSG00000176658 | -2.796355 | -2.316672 | 1 | 1 MYO1D         | K10356 |
| ENSG00000177291 | -2.796355 | -2.316672 | 1 | 1 GJD4          | K07630 |
| ENSG00000177452 | -2.796355 | -2.316672 | 1 | 1 RP4-597J3.1   | K02885 |
| ENSG00000177459 | -2.796355 | -2.316672 | 1 | 1 C8orf47       | -      |
| ENSG00000178125 | -2.796355 | -2.316672 | 1 | 1 PPP1R42       | K09613 |
| ENSG00000178171 | -2.796355 | -2.316672 | 1 | 1 AMER3         | K04372 |
| ENSG00000178233 | -2.796355 | -2.316672 | 1 | 1 TMEM151B      | K01872 |
| ENSG00000178597 | -2.796355 | -2.316672 | 1 | 1 PSAPL1        | K12382 |
| ENSG00000178631 | -2.796355 | -2.316672 | 1 | 1 ACTG1P1       | K05692 |
| ENSG00000178997 | -2.796355 | -2.316672 | 1 | 1 EXD1          | K18740 |
| ENSG00000179023 | -2.796355 | -2.316672 | 1 | 1 KLHDC7A       | -      |
| ENSG00000179057 | -2.796355 | -2.316672 | 1 | 1 IGSF22        | -      |
| ENSG00000179058 | -2.796355 | -2.316672 | 1 | 1 C9orf50       | -      |
| ENSG00000179082 | -2.796355 | -2.316672 | 1 | 1 C9orf106      | -      |
| ENSG00000179101 | -2.796355 | -2.316672 | 1 | 1 RP11-349N19.2 | K11253 |
| ENSG00000179292 | -2.796355 | -2.316672 | 1 | 1 TMEM151A      | -      |
| ENSG00000179407 | -2.796355 | -2.316672 | 1 | 1 DNAJB8        | K09514 |
| ENSG00000179915 | -2.796355 | -2.316672 | 1 | 1 NRXN1         | K07377 |
| ENSG00000180105 | -2.796355 | -2.316672 | 1 | 1 AC017081.2    | K01441 |
| ENSG00000180139 | -2.796355 | -2.316672 | 1 | 1 ACTA2-AS1     | -      |
| ENSG00000180189 | -2.796355 | -2.316672 | 1 | 1 HMGB1P14      | K10802 |
| ENSG00000180245 | -2.796355 | -2.316672 | 1 | 1 RRH           | K04253 |
| ENSG00000180353 | -2.796355 | -2.316672 | 1 | 1 HCLS1         | K06106 |
| ENSG00000180549 | -2.796355 | -2.316672 | 1 | 1 FUT7          | K07635 |
| ENSG00000180610 | -2.796355 | -2.316672 | 1 | 1 ZBTB12P1      | K10499 |
| ENSG00000180697 | -2.796355 | -2.316672 | 1 | 1 C3orf22       | -      |
| ENSG00000180867 | -2.796355 | -2.316672 | 1 | 1 PDIA3P1       | K08056 |
| ENSG00000181039 | -2.796355 | -2.316672 | 1 | 1 ANKRD34A      | K03024 |
| ENSG00000181741 | -2.796355 | -2.316672 | 1 | 1 FDX1P1        | -      |
| ENSG00000181781 | -2.796355 | -2.316672 | 1 | 1 ODF3L2        | -      |
| ENSG00000182389 | -2.796355 | -2.316672 | 1 | 1 CACNB4        | K04865 |
| ENSG00000182500 | -2.796355 | -2.316672 | 1 | 1 ORAI1         | K16056 |
| ENSG00000182545 | -2.796355 | -2.316672 | 1 | 1 RNASE10       | -      |
| ENSG00000182646 | -2.796355 | -2.316672 | 1 | 1 FAM156A       | -      |

|                 |           |           |   |                  |        |
|-----------------|-----------|-----------|---|------------------|--------|
| ENSG00000182774 | -2.796355 | -2.316672 | 1 | 1 RPS17L         | K02962 |
| ENSG00000182814 | -2.796355 | -2.316672 | 1 | 1 FUNDC2P2       | -      |
| ENSG00000182824 | -2.796355 | -2.316672 | 1 | 1 AC008132.1     | -      |
| ENSG00000182870 | -2.796355 | -2.316672 | 1 | 1 GALNT9         | K00710 |
| ENSG00000183196 | -2.796355 | -2.316672 | 1 | 1 CHST6          | K09671 |
| ENSG00000183230 | -2.796355 | -2.316672 | 1 | 1 CTNNA3         | K05691 |
| ENSG00000183305 | -2.796355 | -2.316672 | 1 | 1 MAGEA2B        | -      |
| ENSG00000183324 | -2.796355 | -2.316672 | 1 | 1 C15orf60       | -      |
| ENSG00000183580 | -2.796355 | -2.316672 | 1 | 1 FBXL7          | K10273 |
| ENSG00000183775 | -2.796355 | -2.316672 | 1 | 1 KCTD16         | -      |
| ENSG00000183844 | -2.796355 | -2.316672 | 1 | 1 FAM3B          | -      |
| ENSG00000183979 | -2.796355 | -2.316672 | 1 | 1 NPB            | K05267 |
| ENSG00000184111 | -2.796355 | -2.316672 | 1 | 1 RP11-366I13.3  | K02868 |
| ENSG00000184113 | -2.796355 | -2.316672 | 1 | 1 CLDN5          | K06087 |
| ENSG00000184185 | -2.796355 | -2.316672 | 1 | 1 KCNJ12         | K19468 |
| ENSG00000184343 | -2.796355 | -2.316672 | 1 | 1 SRPK3          | K08832 |
| ENSG00000184371 | -2.796355 | -2.316672 | 1 | 1 CSF1           | K05453 |
| ENSG00000184507 | -2.796355 | -2.316672 | 1 | 1 NUTM1          | -      |
| ENSG00000184735 | -2.796355 | -2.316672 | 1 | 1 DDX53          | K17043 |
| ENSG00000184984 | -2.796355 | -2.316672 | 1 | 1 CHRM5          | K04133 |
| ENSG00000185013 | -2.796355 | -2.316672 | 1 | 1 NT5C1B         | K01081 |
| ENSG00000185070 | -2.796355 | -2.316672 | 1 | 1 FLRT2          | -      |
| ENSG00000185247 | -2.796355 | -2.316672 | 1 | 1 MAGEA11        | -      |
| ENSG00000185306 | -2.796355 | -2.316672 | 1 | 1 C12orf56       | -      |
| ENSG00000185339 | -2.796355 | -2.316672 | 1 | 1 TCN2           | K14619 |
| ENSG00000185433 | -2.796355 | -2.316672 | 1 | 1 LINC00158      | -      |
| ENSG00000185899 | -2.796355 | -2.316672 | 1 | 1 TAS2R60        | K08474 |
| ENSG00000186442 | -2.796355 | -2.316672 | 1 | 1 KRT3           | K07605 |
| ENSG00000186466 | -2.796355 | -2.316672 | 1 | 1 AQP7P1         | K08771 |
| ENSG00000186529 | -2.796355 | -2.316672 | 1 | 1 CYP4F3         | K17726 |
| ENSG00000186628 | -2.796355 | -2.316672 | 1 | 1 FSD2           | -      |
| ENSG00000186998 | -2.796355 | -2.316672 | 1 | 1 EMID1          | -      |
| ENSG00000187045 | -2.796355 | -2.316672 | 1 | 1 TMPRSS6        | K09637 |
| ENSG00000187144 | -2.796355 | -2.316672 | 1 | 1 SPATA21        | -      |
| ENSG00000187166 | -2.796355 | -2.316672 | 1 | 1 H1FNT          | -      |
| ENSG00000187229 | -2.796355 | -2.316672 | 1 | 1 RP11-161I2.1   | -      |
| ENSG00000187268 | -2.796355 | -2.316672 | 1 | 1 FAM9C          | K17985 |
| ENSG00000187288 | -2.796355 | -2.316672 | 1 | 1 CIDEC          | -      |
| ENSG00000187474 | -2.796355 | -2.316672 | 1 | 1 FPR3           | K04173 |
| ENSG00000187616 | -2.796355 | -2.316672 | 1 | 1 TMEM8C         | -      |
| ENSG00000187762 | -2.796355 | -2.316672 | 1 | 1 HSPE1P11       | K04078 |
| ENSG00000187862 | -2.796355 | -2.316672 | 1 | 1 TTC24          | -      |
| ENSG00000187902 | -2.796355 | -2.316672 | 1 | 1 SHISA7         | -      |
| ENSG00000187912 | -2.796355 | -2.316672 | 1 | 1 CLEC17A        | K17513 |
| ENSG00000187955 | -2.796355 | -2.316672 | 1 | 1 COL14A1        | K08133 |
| ENSG00000187987 | -2.796355 | -2.316672 | 1 | 1 ZSCAN23        | K09230 |
| ENSG00000188037 | -2.796355 | -2.316672 | 1 | 1 CLCN1          | K05010 |
| ENSG00000188073 | -2.796355 | -2.316672 | 1 | 1 PMS2P10        | K10858 |
| ENSG00000188089 | -2.796355 | -2.316672 | 1 | 1 PLA2G4E        | K16342 |
| ENSG00000188124 | -2.796355 | -2.316672 | 1 | 1 OR2AG2         | K04257 |
| ENSG00000188162 | -2.796355 | -2.316672 | 1 | 1 OTOG           | -      |
| ENSG00000188305 | -2.796355 | -2.316672 | 1 | 1 C19orf35       | -      |
| ENSG00000188424 | -2.796355 | -2.316672 | 1 | 1 XXbac-B33L19.3 | -      |
| ENSG00000188451 | -2.796355 | -2.316672 | 1 | 1 SRP72P2        | K03108 |
| ENSG00000188624 | -2.796355 | -2.316672 | 1 | 1 IGFL3          | -      |
| ENSG00000188626 | -2.796355 | -2.316672 | 1 | 1 GOLGA8M        | K10595 |
| ENSG00000188676 | -2.796355 | -2.316672 | 1 | 1 IDO2           | K00463 |
| ENSG00000188686 | -2.796355 | -2.316672 | 1 | 1 SCXA           | K09070 |



|                 |           |           |   |                 |        |
|-----------------|-----------|-----------|---|-----------------|--------|
| ENSG00000188693 | -2.796355 | -2.316672 | 1 | 1 CTB-161K23.1  | -      |
| ENSG00000188869 | -2.796355 | -2.316672 | 1 | 1 TMC3          | -      |
| ENSG00000188958 | -2.796355 | -2.316672 | 1 | 1 UTS2B         | K05248 |
| ENSG00000189058 | -2.796355 | -2.316672 | 1 | 1 APOD          | K03098 |
| ENSG00000189320 | -2.796355 | -2.316672 | 1 | 1 FAM180A       | -      |
| ENSG00000189377 | -2.796355 | -2.316672 | 1 | 1 CXCL17        | -      |
| ENSG00000196267 | -2.796355 | -2.316672 | 1 | 1 ZNF836        | K09228 |
| ENSG00000196289 | -2.796355 | -2.316672 | 1 | 1 BECN1P1       | K08334 |
| ENSG00000196369 | -2.796355 | -2.316672 | 1 | 1 SRGAP2B       | K07526 |
| ENSG00000196566 | -2.796355 | -2.316672 | 1 | 1 RP11-57C13.3  | -      |
| ENSG00000196570 | -2.796355 | -2.316672 | 1 | 1 PFN3          | K05759 |
| ENSG00000196593 | -2.796355 | -2.316672 | 1 | 1 ANKRD20A19P   | K17299 |
| ENSG00000196634 | -2.796355 | -2.316672 | 1 | 1 RP3-337D23.3  | -      |
| ENSG00000196666 | -2.796355 | -2.316672 | 1 | 1 FAM180B       | -      |
| ENSG00000196674 | -2.796355 | -2.316672 | 1 | 1 Z98881.1      | -      |
| ENSG00000196867 | -2.796355 | -2.316672 | 1 | 1 ZFP28         | K09228 |
| ENSG00000196900 | -2.796355 | -2.316672 | 1 | 1 C5orf48       | -      |
| ENSG00000196917 | -2.796355 | -2.316672 | 1 | 1 HCAR1         | K08401 |
| ENSG00000197047 | -2.796355 | -2.316672 | 1 | 1 Z73979.1      | -      |
| ENSG00000197168 | -2.796355 | -2.316672 | 1 | 1 NEK5          | K08857 |
| ENSG00000197376 | -2.796355 | -2.316672 | 1 | 1 OR8S1         | K04257 |
| ENSG00000197830 | -2.796355 | -2.316672 | 1 | 1 AC011385.1    | K11447 |
| ENSG00000197882 | -2.796355 | -2.316672 | 1 | 1 OR7E13P       | K04257 |
| ENSG00000197915 | -2.796355 | -2.316672 | 1 | 1 HRNR          | -      |
| ENSG00000198336 | -2.796355 | -2.316672 | 1 | 1 MYL4          | K12750 |
| ENSG00000198416 | -2.796355 | -2.316672 | 1 | 1 CTD-2173L22.4 | K09228 |
| ENSG00000198535 | -2.796355 | -2.316672 | 1 | 1 C2CD4A        | K10734 |
| ENSG00000198566 | -2.796355 | -2.316672 | 1 | 1 ZNF658B       | K09228 |
| ENSG00000198768 | -2.796355 | -2.316672 | 1 | 1 APCDD1L       | -      |
| ENSG00000198945 | -2.796355 | -2.316672 | 1 | 1 L3MBTL3       | -      |
| ENSG00000199226 | -2.796355 | -2.316672 | 1 | 1 RNU6-50P      | -      |
| ENSG00000199415 | -2.796355 | -2.316672 | 1 | 1 RNA5SP370     | -      |
| ENSG00000199466 | -2.796355 | -2.316672 | 1 | 1 Y_RNA         | -      |
| ENSG00000199471 | -2.796355 | -2.316672 | 1 | 1 Y_RNA         | -      |
| ENSG00000199550 | -2.796355 | -2.316672 | 1 | 1 Y_RNA         | -      |
| ENSG00000199664 | -2.796355 | -2.316672 | 1 | 1 RNU6-1266P    | -      |
| ENSG00000199668 | -2.796355 | -2.316672 | 1 | 1 Y_RNA         | -      |
| ENSG00000199676 | -2.796355 | -2.316672 | 1 | 1 Y_RNA         | -      |
| ENSG00000199732 | -2.796355 | -2.316672 | 1 | 1 Y_RNA         | -      |
| ENSG00000199755 | -2.796355 | -2.316672 | 1 | 1 Y_RNA         | -      |
| ENSG00000199806 | -2.796355 | -2.316672 | 1 | 1 RNA5SP491     | -      |
| ENSG00000199961 | -2.796355 | -2.316672 | 1 | 1 SNORD1B       | -      |
| ENSG00000200059 | -2.796355 | -2.316672 | 1 | 1 Y_RNA         | -      |
| ENSG00000200063 | -2.796355 | -2.316672 | 1 | 1 SNORA30       | -      |
| ENSG00000200201 | -2.796355 | -2.316672 | 1 | 1 Y_RNA         | -      |
| ENSG00000200209 | -2.796355 | -2.316672 | 1 | 1 Y_RNA         | -      |
| ENSG00000200237 | -2.796355 | -2.316672 | 1 | 1 SNORA70       | -      |
| ENSG00000200252 | -2.796355 | -2.316672 | 1 | 1 Y_RNA         | -      |
| ENSG00000200354 | -2.796355 | -2.316672 | 1 | 1 SNORA71D      | -      |
| ENSG00000200525 | -2.796355 | -2.316672 | 1 | 1 RNU6-1209P    | -      |
| ENSG00000200579 | -2.796355 | -2.316672 | 1 | 1 Y_RNA         | -      |
| ENSG00000200759 | -2.796355 | -2.316672 | 1 | 1 RNU6-884P     | -      |
| ENSG00000200785 | -2.796355 | -2.316672 | 1 | 1 SNORD8        | -      |
| ENSG00000200847 | -2.796355 | -2.316672 | 1 | 1 Y_RNA         | -      |
| ENSG00000200888 | -2.796355 | -2.316672 | 1 | 1 Y_RNA         | -      |
| ENSG00000200914 | -2.796355 | -2.316672 | 1 | 1 RNA5SP435     | -      |
| ENSG00000200972 | -2.796355 | -2.316672 | 1 | 1 RNU5A-8P      | -      |
| ENSG00000200985 | -2.796355 | -2.316672 | 1 | 1 RNA5SP493     | -      |

|                 |           |           |   |                 |        |
|-----------------|-----------|-----------|---|-----------------|--------|
| ENSG00000201025 | -2.796355 | -2.316672 | 1 | 1 SNORD74       | -      |
| ENSG00000201077 | -2.796355 | -2.316672 | 1 | 1 RNU6-188P     | -      |
| ENSG00000201113 | -2.796355 | -2.316672 | 1 | 1 RNU6-647P     | -      |
| ENSG00000201217 | -2.796355 | -2.316672 | 1 | 1 Y_RNA         | -      |
| ENSG00000201239 | -2.796355 | -2.316672 | 1 | 1 Y_RNA         | -      |
| ENSG00000201407 | -2.796355 | -2.316672 | 1 | 1 SNORA68       | -      |
| ENSG00000201469 | -2.796355 | -2.316672 | 1 | 1 RNA5SP379     | -      |
| ENSG00000201470 | -2.796355 | -2.316672 | 1 | 1 RNY4P7        | -      |
| ENSG00000201492 | -2.796355 | -2.316672 | 1 | 1 RNA5SP78      | -      |
| ENSG00000201499 | -2.796355 | -2.316672 | 1 | 1 RNU6-312P     | -      |
| ENSG00000201573 | -2.796355 | -2.316672 | 1 | 1 Y_RNA         | -      |
| ENSG00000201622 | -2.796355 | -2.316672 | 1 | 1 RNU6-621P     | -      |
| ENSG00000201761 | -2.796355 | -2.316672 | 1 | 1 RNU6-336P     | -      |
| ENSG00000202031 | -2.796355 | -2.316672 | 1 | 1 SNORD38A      | -      |
| ENSG00000202272 | -2.796355 | -2.316672 | 1 | 1 Y_RNA         | -      |
| ENSG00000202279 | -2.796355 | -2.316672 | 1 | 1 Y_RNA         | -      |
| ENSG00000202318 | -2.796355 | -2.316672 | 1 | 1 Y_RNA         | -      |
| ENSG00000202537 | -2.796355 | -2.316672 | 1 | 1 U8            | -      |
| ENSG00000203315 | -2.796355 | -2.316672 | 1 | 1 AC015815.2    | K15696 |
| ENSG00000203403 | -2.796355 | -2.316672 | 1 | 1 AC020907.2    | K09228 |
| ENSG00000203428 | -2.796355 | -2.316672 | 1 | 1 AC140061.9    | K14443 |
| ENSG00000203563 | -2.796355 | -2.316672 | 1 | 1 AC138951.1    | K13194 |
| ENSG00000203632 | -2.796355 | -2.316672 | 1 | 1 AC007690.1    | K05255 |
| ENSG00000203722 | -2.796355 | -2.316672 | 1 | 1 RAET1G        | K07987 |
| ENSG00000203734 | -2.796355 | -2.316672 | 1 | 1 ECT2L         | -      |
| ENSG00000203814 | -2.796355 | -2.316672 | 1 | 1 HIST2H2BF     | K11252 |
| ENSG00000203930 | -2.796355 | -2.316672 | 1 | 1 LINC00632     | -      |
| ENSG00000204001 | -2.796355 | -2.316672 | 1 | 1 LCN8          | -      |
| ENSG00000204165 | -2.796355 | -2.316672 | 1 | 1 CXorf65       | -      |
| ENSG00000204195 | -2.796355 | -2.316672 | 1 | 1 AWAT1         | K11171 |
| ENSG00000204344 | -2.796355 | -2.316672 | 1 | 1 STK19         | K08880 |
| ENSG00000204446 | -2.796355 | -2.316672 | 1 | 1 C9orf170      | -      |
| ENSG00000204463 | -2.796355 | -2.316672 | 1 | 1 BAG6          | -      |
| ENSG00000204464 | -2.796355 | -2.316672 | 1 | 1 C1orf195      | -      |
| ENSG00000204533 | -2.796355 | -2.316672 | 1 | 1 AC024580.1    | -      |
| ENSG00000204711 | -2.796355 | -2.316672 | 1 | 1 C9orf135      | K02981 |
| ENSG00000204793 | -2.796355 | -2.316672 | 1 | 1 FOXD4L6       | K09397 |
| ENSG00000204928 | -2.796355 | -2.316672 | 1 | 1 GRXCR2        | -      |
| ENSG00000205041 | -2.796355 | -2.316672 | 1 | 1 CTC-425O23.2  | -      |
| ENSG00000205085 | -2.796355 | -2.316672 | 1 | 1 FAM71F2       | -      |
| ENSG00000205111 | -2.796355 | -2.316672 | 1 | 1 CDKL4         | K08824 |
| ENSG00000205181 | -2.796355 | -2.316672 | 1 | 1 LINC00654     | -      |
| ENSG00000205361 | -2.796355 | -2.316672 | 1 | 1 MT1DP         | K14739 |
| ENSG00000205482 | -2.796355 | -2.316672 | 1 | 1 AC007000.12   | K08694 |
| ENSG00000205500 | -2.796355 | -2.316672 | 1 | 1 AC013472.3    | -      |
| ENSG00000205592 | -2.796355 | -2.316672 | 1 | 1 MUC19         | -      |
| ENSG00000205595 | -2.796355 | -2.316672 | 1 | 1 AREGB         | K09782 |
| ENSG00000205644 | -2.796355 | -2.316672 | 1 | 1 CTD-2375G15.1 | K02981 |
| ENSG00000206127 | -2.796355 | -2.316672 | 1 | 1 GOLGA8O       | K10595 |
| ENSG00000206168 | -2.796355 | -2.316672 | 1 | 1 Z69890.1      | -      |
| ENSG00000206190 | -2.796355 | -2.316672 | 1 | 1 ATP10A        | K01530 |
| ENSG00000206384 | -2.796355 | -2.316672 | 1 | 1 COL6A6        | K06238 |
| ENSG00000206503 | -2.796355 | -2.316672 | 1 | 1 HLA-A         | K06751 |
| ENSG00000206645 | -2.796355 | -2.316672 | 1 | 1 Y_RNA         | -      |
| ENSG00000206647 | -2.796355 | -2.316672 | 1 | 1 SNORA2        | -      |
| ENSG00000206650 | -2.796355 | -2.316672 | 1 | 1 SNORA70G      | -      |
| ENSG00000206679 | -2.796355 | -2.316672 | 1 | 1 Y_RNA         | -      |
| ENSG00000206698 | -2.796355 | -2.316672 | 1 | 1 RNU1-73P      | -      |

|                 |           |           |   |                 |        |
|-----------------|-----------|-----------|---|-----------------|--------|
| ENSG00000206739 | -2.796355 | -2.316672 | 1 | 1 Y_RNA         | --     |
| ENSG00000206814 | -2.796355 | -2.316672 | 1 | 1 Y_RNA         | --     |
| ENSG00000206824 | -2.796355 | -2.316672 | 1 | 1 Y_RNA         | --     |
| ENSG00000206838 | -2.796355 | -2.316672 | 1 | 1 SNORA5A       | --     |
| ENSG00000206897 | -2.796355 | -2.316672 | 1 | 1 SNORA9        | --     |
| ENSG00000206899 | -2.796355 | -2.316672 | 1 | 1 RNU6-36P      | --     |
| ENSG00000206921 | -2.796355 | -2.316672 | 1 | 1 RNU6-481P     | --     |
| ENSG00000206922 | -2.796355 | -2.316672 | 1 | 1 RNU6-80P      | --     |
| ENSG00000206937 | -2.796355 | -2.316672 | 1 | 1 SNORA70B      | --     |
| ENSG00000206952 | -2.796355 | -2.316672 | 1 | 1 SNORA50       | --     |
| ENSG00000206962 | -2.796355 | -2.316672 | 1 | 1 RNU6-74P      | --     |
| ENSG00000206969 | -2.796355 | -2.316672 | 1 | 1 RNU6-1316P    | --     |
| ENSG00000206995 | -2.796355 | -2.316672 | 1 | 1 Y_RNA         | --     |
| ENSG00000207036 | -2.796355 | -2.316672 | 1 | 1 Y_RNA         | --     |
| ENSG00000207052 | -2.796355 | -2.316672 | 1 | 1 RNU6-378P     | --     |
| ENSG00000207088 | -2.796355 | -2.316672 | 1 | 1 SNORA7B       | --     |
| ENSG00000207127 | -2.796355 | -2.316672 | 1 | 1 Y_RNA         | --     |
| ENSG00000207129 | -2.796355 | -2.316672 | 1 | 1 RNA5SP187     | --     |
| ENSG00000207171 | -2.796355 | -2.316672 | 1 | 1 SNORA51       | --     |
| ENSG00000207218 | -2.796355 | -2.316672 | 1 | 1 Y_RNA         | --     |
| ENSG00000207233 | -2.796355 | -2.316672 | 1 | 1 SNORA37       | --     |
| ENSG00000207240 | -2.796355 | -2.316672 | 1 | 1 Y_RNA         | --     |
| ENSG00000207297 | -2.796355 | -2.316672 | 1 | 1 SNORD7        | --     |
| ENSG00000207357 | -2.796355 | -2.316672 | 1 | 1 RNU6-2        | --     |
| ENSG00000207455 | -2.796355 | -2.316672 | 1 | 1 RNU6-331P     | --     |
| ENSG00000207512 | -2.796355 | -2.316672 | 1 | 1 Y_RNA         | --     |
| ENSG00000207609 | -2.796355 | -2.316672 | 1 | 1 MIR491        | --     |
| ENSG00000207612 | -2.796355 | -2.316672 | 1 | 1 MIR604        | --     |
| ENSG00000207614 | -2.796355 | -2.316672 | 1 | 1 MIR193A       | --     |
| ENSG00000207635 | -2.796355 | -2.316672 | 1 | 1 MIR499A       | --     |
| ENSG00000207693 | -2.796355 | -2.316672 | 1 | 1 MIR602        | --     |
| ENSG00000207709 | -2.796355 | -2.316672 | 1 | 1 MIR197        | --     |
| ENSG00000207736 | -2.796355 | -2.316672 | 1 | 1 MIR657        | --     |
| ENSG00000207737 | -2.796355 | -2.316672 | 1 | 1 MIR181B2      | --     |
| ENSG00000207751 | -2.796355 | -2.316672 | 1 | 1 MIR130B       | --     |
| ENSG00000207755 | -2.796355 | -2.316672 | 1 | 1 MIR450A2      | --     |
| ENSG00000207771 | -2.796355 | -2.316672 | 1 | 1 MIR550A1      | --     |
| ENSG00000207808 | -2.796355 | -2.316672 | 1 | 1 MIR27A        | --     |
| ENSG00000207814 | -2.796355 | -2.316672 | 1 | 1 MIR147A       | --     |
| ENSG00000207815 | -2.796355 | -2.316672 | 1 | 1 MIR563        | --     |
| ENSG00000207874 | -2.796355 | -2.316672 | 1 | 1 MIR610        | --     |
| ENSG00000207956 | -2.796355 | -2.316672 | 1 | 1 MIR579        | --     |
| ENSG00000208018 | -2.796355 | -2.316672 | 1 | 1 MIR645        | --     |
| ENSG00000211491 | -2.796355 | -2.316672 | 1 | 1 MIR320D1      | --     |
| ENSG00000211513 | -2.796355 | -2.316672 | 1 | 1 MIR320E       | --     |
| ENSG00000211892 | -2.796355 | -2.316672 | 1 | 1 IGHG4         | K06856 |
| ENSG00000211937 | -2.796355 | -2.316672 | 1 | 1 IGHV2-5       | --     |
| ENSG00000211997 | -2.796355 | -2.316672 | 1 | 1 MIR708        | --     |
| ENSG00000212432 | -2.796355 | -2.316672 | 1 | 1 SNORA75       | --     |
| ENSG00000212464 | -2.796355 | -2.316672 | 1 | 1 SNORA12       | --     |
| ENSG00000212569 | -2.796355 | -2.316672 | 1 | 1 Y_RNA         | --     |
| ENSG00000212572 | -2.796355 | -2.316672 | 1 | 1 RNU6-903P     | --     |
| ENSG00000212605 | -2.796355 | -2.316672 | 1 | 1 RNU1-56P      | --     |
| ENSG00000212643 | -2.796355 | -2.316672 | 1 | 1 ZRSR1         | --     |
| ENSG00000212930 | -2.796355 | -2.316672 | 1 | 1 RP11-414H23.2 | --     |
| ENSG00000213013 | -2.796355 | -2.316672 | 1 | 1 RPS15AP36     | K02957 |
| ENSG00000213041 | -2.796355 | -2.316672 | 1 | 1 RP11-383G10.3 | K02880 |
| ENSG00000213049 | -2.796355 | -2.316672 | 1 | 1 HNRNPA1P34    | K12741 |

|                 |           |           |   |                  |        |
|-----------------|-----------|-----------|---|------------------|--------|
| ENSG00000213055 | -2.796355 | -2.316672 | 1 | 1 AC064852.5     | K03232 |
| ENSG00000213090 | -2.796355 | -2.316672 | 1 | 1 AC007256.5     | K17541 |
| ENSG00000213104 | -2.796355 | -2.316672 | 1 | 1 NPM1P46        | K11276 |
| ENSG00000213111 | -2.796355 | -2.316672 | 1 | 1 COX5BP2        | -      |
| ENSG00000213169 | -2.796355 | -2.316672 | 1 | 1 RP11-393N4.2   | K02938 |
| ENSG00000213188 | -2.796355 | -2.316672 | 1 | 1 YBX1P4         | K09276 |
| ENSG00000213239 | -2.796355 | -2.316672 | 1 | 1 NPM1P32        | K11276 |
| ENSG00000213262 | -2.796355 | -2.316672 | 1 | 1 AL365331.2     | K15040 |
| ENSG00000213293 | -2.796355 | -2.316672 | 1 | 1 CTD-2666L21.3  | K02903 |
| ENSG00000213352 | -2.796355 | -2.316672 | 1 | 1 GAPDHP44       | K00134 |
| ENSG00000213434 | -2.796355 | -2.316672 | 1 | 1 VTI1BP2        | K08493 |
| ENSG00000213438 | -2.796355 | -2.316672 | 1 | 1 YBX2P1         | K09277 |
| ENSG00000213529 | -2.796355 | -2.316672 | 1 | 1 RP11-432F4.2   | K02912 |
| ENSG00000213540 | -2.796355 | -2.316672 | 1 | 1 RP11-486G15.1  | K03671 |
| ENSG00000213556 | -2.796355 | -2.316672 | 1 | 1 RP11-3J11.1    | K02130 |
| ENSG00000213592 | -2.796355 | -2.316672 | 1 | 1 AP000662.9     | K03767 |
| ENSG00000213671 | -2.796355 | -2.316672 | 1 | 1 OLA1P2         | K06942 |
| ENSG00000213750 | -2.796355 | -2.316672 | 1 | 1 KB-1683C8.1    | K02981 |
| ENSG00000213771 | -2.796355 | -2.316672 | 1 | 1 KRT8P37        | K07605 |
| ENSG00000213801 | -2.796355 | -2.316672 | 1 | 1 ZNF816-ZNF321P | K09228 |
| ENSG00000213830 | -2.796355 | -2.316672 | 1 | 1 CFL1P5         | K05765 |
| ENSG00000213953 | -2.796355 | -2.316672 | 1 | 1 AC018867.1     | -      |
| ENSG00000214006 | -2.796355 | -2.316672 | 1 | 1 AL353671.4     | K09228 |
| ENSG00000214019 | -2.796355 | -2.316672 | 1 | 1 RP6-218J18.2   | K13091 |
| ENSG00000214081 | -2.796355 | -2.316672 | 1 | 1 CYP4F30P       | K17726 |
| ENSG00000214248 | -2.796355 | -2.316672 | 1 | 1 AC010336.1     | K12581 |
| ENSG00000214380 | -2.796355 | -2.316672 | 1 | 1 RP11-457K10.2  | K08065 |
| ENSG00000214401 | -2.796355 | -2.316672 | 1 | 1 KANSL1-AS1     | -      |
| ENSG00000214535 | -2.796355 | -2.316672 | 1 | 1 RPS15AP1       | K02957 |
| ENSG00000214597 | -2.796355 | -2.316672 | 1 | 1 TMEM249        | -      |
| ENSG00000214695 | -2.796355 | -2.316672 | 1 | 1 NPAP1P2        | K08857 |
| ENSG00000214733 | -2.796355 | -2.316672 | 1 | 1 RP11-429J17.8  | -      |
| ENSG00000214822 | -2.796355 | -2.316672 | 1 | 1 KRT16P3        | K07604 |
| ENSG00000214860 | -2.796355 | -2.316672 | 1 | 1 EVPLL          | K10383 |
| ENSG00000214871 | -2.796355 | -2.316672 | 1 | 1 AC005082.1     | K12581 |
| ENSG00000215009 | -2.796355 | -2.316672 | 1 | 1 ACSM4          | K01896 |
| ENSG00000215283 | -2.796355 | -2.316672 | 1 | 1 HMGB3P24       | K11296 |
| ENSG00000215284 | -2.796355 | -2.316672 | 1 | 1 RP11-198M15.1  | K12198 |
| ENSG00000215482 | -2.796355 | -2.316672 | 1 | 1 CALM2P3        | K02183 |
| ENSG00000215515 | -2.796355 | -2.316672 | 1 | 1 IFIT1P1        | K14217 |
| ENSG00000215533 | -2.796355 | -2.316672 | 1 | 1 LINC00189      | -      |
| ENSG00000215841 | -2.796355 | -2.316672 | 1 | 1 RP11-800A3.2   | -      |
| ENSG00000215866 | -2.796355 | -2.316672 | 1 | 1 RP11-426L16.8  | -      |
| ENSG00000215902 | -2.796355 | -2.316672 | 1 | 1 AL353354.1     | -      |
| ENSG00000215914 | -2.796355 | -2.316672 | 1 | 1 MMP23A         | K08001 |
| ENSG00000216115 | -2.796355 | -2.316672 | 1 | 1 AC017083.1     | -      |
| ENSG00000216141 | -2.796355 | -2.316672 | 1 | 1 MIR941-2       | -      |
| ENSG00000216475 | -2.796355 | -2.316672 | 1 | 1 RP1-91J24.1    | K03111 |
| ENSG00000217075 | -2.796355 | -2.316672 | 1 | 1 AC007401.2     | -      |
| ENSG00000217078 | -2.796355 | -2.316672 | 1 | 1 RP1-13D10.3    | -      |
| ENSG00000217195 | -2.796355 | -2.316672 | 1 | 1 RP11-277I20.2  | -      |
| ENSG00000217258 | -2.796355 | -2.316672 | 1 | 1 AC007249.3     | -      |
| ENSG00000217289 | -2.796355 | -2.316672 | 1 | 1 AC018865.5     | -      |
| ENSG00000217684 | -2.796355 | -2.316672 | 1 | 1 RPS3AP24       | K02984 |
| ENSG00000217862 | -2.796355 | -2.316672 | 1 | 1 HIST1H4PS1     | -      |
| ENSG00000217874 | -2.796355 | -2.316672 | 1 | 1 OR4F7P         | K04257 |
| ENSG00000218073 | -2.796355 | -2.316672 | 1 | 1 RP1-13D10.2    | K10136 |
| ENSG00000218274 | -2.796355 | -2.316672 | 1 | 1 RP3-407E4.3    | -      |

|                 |           |           |   |                 |        |
|-----------------|-----------|-----------|---|-----------------|--------|
| ENSG00000218520 | -2.796355 | -2.316672 | 1 | 1 RP11-184C23.4 | -      |
| ENSG00000218682 | -2.796355 | -2.316672 | 1 | 1 AC010150.1    | K01689 |
| ENSG00000218896 | -2.796355 | -2.316672 | 1 | 1 TUBB8P2       | K07375 |
| ENSG00000219391 | -2.796355 | -2.316672 | 1 | 1 AC019129.1    | K13126 |
| ENSG00000219451 | -2.796355 | -2.316672 | 1 | 1 RPL23P8       | K02894 |
| ENSG00000219565 | -2.796355 | -2.316672 | 1 | 1 ZNF259P1      | K06874 |
| ENSG00000219608 | -2.796355 | -2.316672 | 1 | 1 HIGD1AP16     | -      |
| ENSG00000219699 | -2.796355 | -2.316672 | 1 | 1 RP11-325O24.2 | K04508 |
| ENSG00000219770 | -2.796355 | -2.316672 | 1 | 1 VN1R11P       | K04614 |
| ENSG00000219986 | -2.796355 | -2.316672 | 1 | 1 BTF3P7        | K01527 |
| ENSG00000220392 | -2.796355 | -2.316672 | 1 | 1 FCF1P5        | -      |
| ENSG00000220506 | -2.796355 | -2.316672 | 1 | 1 RP3-415N12.1  | -      |
| ENSG00000220563 | -2.796355 | -2.316672 | 1 | 1 PKMP3         | K00873 |
| ENSG00000220773 | -2.796355 | -2.316672 | 1 | 1 RP3-334F4.1   | K02998 |
| ENSG00000221020 | -2.796355 | -2.316672 | 1 | 1 AC107993.1    | -      |
| ENSG00000221044 | -2.796355 | -2.316672 | 1 | 1 U3            | -      |
| ENSG00000221063 | -2.796355 | -2.316672 | 1 | 1 MIR1296       | -      |
| ENSG00000221159 | -2.796355 | -2.316672 | 1 | 1 AL356741.1    | -      |
| ENSG00000221261 | -2.796355 | -2.316672 | 1 | 1 MIR1208       | -      |
| ENSG00000221439 | -2.796355 | -2.316672 | 1 | 1 RNU4ATAC16P   | -      |
| ENSG00000221520 | -2.796355 | -2.316672 | 1 | 1 MIR1285-1     | -      |
| ENSG00000221598 | -2.796355 | -2.316672 | 1 | 1 MIR1249       | -      |
| ENSG00000221681 | -2.796355 | -2.316672 | 1 | 1 AC092902.1    | -      |
| ENSG00000221740 | -2.796355 | -2.316672 | 1 | 1 SNORD93       | -      |
| ENSG00000221937 | -2.796355 | -2.316672 | 1 | 1 TAS2R40       | K08474 |
| ENSG00000222047 | -2.796355 | -2.316672 | 1 | 1 C10orf55      | K01348 |
| ENSG00000222092 | -2.796355 | -2.316672 | 1 | 1 RNU6-908P     | -      |
| ENSG00000222460 | -2.796355 | -2.316672 | 1 | 1 RN7SKP271     | -      |
| ENSG00000222705 | -2.796355 | -2.316672 | 1 | 1 RN7SKP39      | -      |
| ENSG00000222724 | -2.796355 | -2.316672 | 1 | 1 RNU2-63P      | -      |
| ENSG00000223003 | -2.796355 | -2.316672 | 1 | 1 RNA5SP184     | -      |
| ENSG00000223113 | -2.796355 | -2.316672 | 1 | 1 RNA5SP247     | -      |
| ENSG00000223138 | -2.796355 | -2.316672 | 1 | 1 RNA5SP450     | -      |
| ENSG00000223263 | -2.796355 | -2.316672 | 1 | 1 RNU6-387P     | -      |
| ENSG00000223284 | -2.796355 | -2.316672 | 1 | 1 RNU6-195P     | -      |
| ENSG00000223492 | -2.796355 | -2.316672 | 1 | 1 RP11-15M15.1  | -      |
| ENSG00000223505 | -2.796355 | -2.316672 | 1 | 1 RP11-397P13.7 | K02917 |
| ENSG00000223575 | -2.796355 | -2.316672 | 1 | 1 RBMX2P3       | K13107 |
| ENSG00000223634 | -2.796355 | -2.316672 | 1 | 1 AC012506.3    | -      |
| ENSG00000223718 | -2.796355 | -2.316672 | 1 | 1 AC093107.7    | K02877 |
| ENSG00000223724 | -2.796355 | -2.316672 | 1 | 1 RAD17P2       | K06662 |
| ENSG00000223806 | -2.796355 | -2.316672 | 1 | 1 LINC00114     | -      |
| ENSG00000223821 | -2.796355 | -2.316672 | 1 | 1 RP11-505P4.6  | -      |
| ENSG00000223829 | -2.796355 | -2.316672 | 1 | 1 AC004870.4    | -      |
| ENSG00000223864 | -2.796355 | -2.316672 | 1 | 1 NPM1P19       | K11276 |
| ENSG00000223873 | -2.796355 | -2.316672 | 1 | 1 AC013733.5    | K14324 |
| ENSG00000223956 | -2.796355 | -2.316672 | 1 | 1 RP4-710M16.2  | -      |
| ENSG00000223972 | -2.796355 | -2.316672 | 1 | 1 DDX11L1       | K11273 |
| ENSG00000224001 | -2.796355 | -2.316672 | 1 | 1 RP11-270F18.2 | K07955 |
| ENSG00000224049 | -2.796355 | -2.316672 | 1 | 1 RP11-30O15.1  | -      |
| ENSG00000224057 | -2.796355 | -2.316672 | 1 | 1 EGFR-AS1      | -      |
| ENSG00000224079 | -2.796355 | -2.316672 | 1 | 1 AC091729.7    | -      |
| ENSG00000224083 | -2.796355 | -2.316672 | 1 | 1 RP11-39K24.4  | K02256 |
| ENSG00000224085 | -2.796355 | -2.316672 | 1 | 1 RP11-4H14.1   | K02893 |
| ENSG00000224132 | -2.796355 | -2.316672 | 1 | 1 AC112715.2    | -      |
| ENSG00000224221 | -2.796355 | -2.316672 | 1 | 1 RPS6P8        | -      |
| ENSG00000224315 | -2.796355 | -2.316672 | 1 | 1 RPL7P7        | K02937 |
| ENSG00000224356 | -2.796355 | -2.316672 | 1 | 1 RP11-151A6.4  | -      |

|                 |           |           |   |                 |        |
|-----------------|-----------|-----------|---|-----------------|--------|
| ENSG00000224429 | -2.796355 | -2.316672 | 1 | 1 LINC00422     | -      |
| ENSG00000224473 | -2.796355 | -2.316672 | 1 | 1 RP11-449I17.5 | K10152 |
| ENSG00000224514 | -2.796355 | -2.316672 | 1 | 1 LINC00620     | -      |
| ENSG00000224541 | -2.796355 | -2.316672 | 1 | 1 AP001439.2    | -      |
| ENSG00000224569 | -2.796355 | -2.316672 | 1 | 1 RP11-341G5.2  | -      |
| ENSG00000224648 | -2.796355 | -2.316672 | 1 | 1 RP11-397D12.4 | -      |
| ENSG00000224652 | -2.796355 | -2.316672 | 1 | 1 LINC00885     | -      |
| ENSG00000224729 | -2.796355 | -2.316672 | 1 | 1 PCOLCE-AS1    | -      |
| ENSG00000224733 | -2.796355 | -2.316672 | 1 | 1 RP1-86D1.5    | -      |
| ENSG00000224739 | -2.796355 | -2.316672 | 1 | 1 AC016735.1    | -      |
| ENSG00000224763 | -2.796355 | -2.316672 | 1 | 1 FDPSP8        | K00787 |
| ENSG00000224799 | -2.796355 | -2.316672 | 1 | 1 RP11-445O16.3 | -      |
| ENSG00000224820 | -2.796355 | -2.316672 | 1 | 1 BTF3P4        | K01527 |
| ENSG00000224838 | -2.796355 | -2.316672 | 1 | 1 FKSG52        | -      |
| ENSG00000224853 | -2.796355 | -2.316672 | 1 | 1 LINC00393     | -      |
| ENSG00000224940 | -2.796355 | -2.316672 | 1 | 1 PRRT4         | -      |
| ENSG00000224960 | -2.796355 | -2.316672 | 1 | 1 SMEK3P        | K17491 |
| ENSG00000225010 | -2.796355 | -2.316672 | 1 | 1 RP11-435B5.1  | -      |
| ENSG00000225062 | -2.796355 | -2.316672 | 1 | 1 AC021016.6    | -      |
| ENSG00000225098 | -2.796355 | -2.316672 | 1 | 1 BCRP1         | K08878 |
| ENSG00000225119 | -2.796355 | -2.316672 | 1 | 1 LINC00999     | K18047 |
| ENSG00000225131 | -2.796355 | -2.316672 | 1 | 1 PSME2P2       | K06697 |
| ENSG00000225133 | -2.796355 | -2.316672 | 1 | 1 MORF4L1P4     | -      |
| ENSG00000225163 | -2.796355 | -2.316672 | 1 | 1 LINC00618     | -      |
| ENSG00000225166 | -2.796355 | -2.316672 | 1 | 1 AC012462.2    | -      |
| ENSG00000225230 | -2.796355 | -2.316672 | 1 | 1 AC008937.3    | -      |
| ENSG00000225280 | -2.796355 | -2.316672 | 1 | 1 RP11-227D2.3  | -      |
| ENSG00000225364 | -2.796355 | -2.316672 | 1 | 1 ATP6V0E1P1    | -      |
| ENSG00000225401 | -2.796355 | -2.316672 | 1 | 1 TGIF2P1       | K19553 |
| ENSG00000225408 | -2.796355 | -2.316672 | 1 | 1 RP11-207C16.4 | -      |
| ENSG00000225420 | -2.796355 | -2.316672 | 1 | 1 AC104134.2    | -      |
| ENSG00000225486 | -2.796355 | -2.316672 | 1 | 1 RP11-301G21.1 | K14394 |
| ENSG00000225514 | -2.796355 | -2.316672 | 1 | 1 MTND1P34      | -      |
| ENSG00000225535 | -2.796355 | -2.316672 | 1 | 1 AC068610.3    | -      |
| ENSG00000225591 | -2.796355 | -2.316672 | 1 | 1 RP11-360D2.2  | K02978 |
| ENSG00000225667 | -2.796355 | -2.316672 | 1 | 1 LINC00505     | -      |
| ENSG00000225718 | -2.796355 | -2.316672 | 1 | 1 RP11-3P22.2   | -      |
| ENSG00000225744 | -2.796355 | -2.316672 | 1 | 1 AC017002.4    | -      |
| ENSG00000225751 | -2.796355 | -2.316672 | 1 | 1 AC087501.1    | -      |
| ENSG00000225792 | -2.796355 | -2.316672 | 1 | 1 AC004540.4    | -      |
| ENSG00000225798 | -2.796355 | -2.316672 | 1 | 1 AC025918.2    | -      |
| ENSG00000225854 | -2.796355 | -2.316672 | 1 | 1 RP11-569G9.7  | K02915 |
| ENSG00000225877 | -2.796355 | -2.316672 | 1 | 1 AC004603.4    | -      |
| ENSG00000225945 | -2.796355 | -2.316672 | 1 | 1 RP3-441A12.1  | -      |
| ENSG00000225963 | -2.796355 | -2.316672 | 1 | 1 AC009950.2    | -      |
| ENSG00000226008 | -2.796355 | -2.316672 | 1 | 1 AC073135.7    | K16941 |
| ENSG00000226026 | -2.796355 | -2.316672 | 1 | 1 RP11-57H12.3  | -      |
| ENSG00000226058 | -2.796355 | -2.316672 | 1 | 1 AC092570.1    | K00237 |
| ENSG00000226153 | -2.796355 | -2.316672 | 1 | 1 RP3-389A20.5  | K17610 |
| ENSG00000226156 | -2.796355 | -2.316672 | 1 | 1 RPL23AP76     | -      |
| ENSG00000226253 | -2.796355 | -2.316672 | 1 | 1 MRPL35P3      | K02916 |
| ENSG00000226258 | -2.796355 | -2.316672 | 1 | 1 GRM7-AS3      | -      |
| ENSG00000226262 | -2.796355 | -2.316672 | 1 | 1 PHKBP1        | K07190 |
| ENSG00000226291 | -2.796355 | -2.316672 | 1 | 1 AC091729.8    | -      |
| ENSG00000226428 | -2.796355 | -2.316672 | 1 | 1 RP11-106M7.4  | K02877 |
| ENSG00000226450 | -2.796355 | -2.316672 | 1 | 1 CYP2D8P       | K17712 |
| ENSG00000226465 | -2.796355 | -2.316672 | 1 | 1 RP13-401N8.1  | -      |
| ENSG00000226499 | -2.796355 | -2.316672 | 1 | 1 RP5-882O7.1   | K02981 |

|                 |           |           |   |                 |        |
|-----------------|-----------|-----------|---|-----------------|--------|
| ENSG00000226505 | -2.796355 | -2.316672 | 1 | 1 AC016700.3    | -      |
| ENSG00000226520 | -2.796355 | -2.316672 | 1 | 1 KIRREL-IT1    | -      |
| ENSG00000226524 | -2.796355 | -2.316672 | 1 | 1 RP1-102H19.8  | K02927 |
| ENSG00000226549 | -2.796355 | -2.316672 | 1 | 1 SCDP1         | K00507 |
| ENSG00000226666 | -2.796355 | -2.316672 | 1 | 1 HSPA9P1       | K04043 |
| ENSG00000226673 | -2.796355 | -2.316672 | 1 | 1 LINC01108     | -      |
| ENSG00000226705 | -2.796355 | -2.316672 | 1 | 1 SDCBPP1       | K17254 |
| ENSG00000226813 | -2.796355 | -2.316672 | 1 | 1 AC114813.1    | -      |
| ENSG00000226820 | -2.796355 | -2.316672 | 1 | 1 RP11-747I9.1  | K04210 |
| ENSG00000226869 | -2.796355 | -2.316672 | 1 | 1 LHFPL3-AS1    | -      |
| ENSG00000226878 | -2.796355 | -2.316672 | 1 | 1 GSTM3P2       | K00799 |
| ENSG00000226889 | -2.796355 | -2.316672 | 1 | 1 RP11-474I16.8 | -      |
| ENSG00000226919 | -2.796355 | -2.316672 | 1 | 1 RP11-80B9.1   | -      |
| ENSG00000226926 | -2.796355 | -2.316672 | 1 | 1 AC010423.1    | -      |
| ENSG00000226948 | -2.796355 | -2.316672 | 1 | 1 RPS4XP2       | K02987 |
| ENSG00000226957 | -2.796355 | -2.316672 | 1 | 1 RP4-533D7.4   | -      |
| ENSG00000226964 | -2.796355 | -2.316672 | 1 | 1 RHEBP2        | K07208 |
| ENSG00000226973 | -2.796355 | -2.316672 | 1 | 1 RP4-663N10.2  | K01380 |
| ENSG00000226987 | -2.796355 | -2.316672 | 1 | 1 RP11-544A12.5 | K02872 |
| ENSG00000226991 | -2.796355 | -2.316672 | 1 | 1 AC112229.6    | K09228 |
| ENSG00000227045 | -2.796355 | -2.316672 | 1 | 1 RP11-98D18.1  | -      |
| ENSG00000227150 | -2.796355 | -2.316672 | 1 | 1 RP11-473E2.3  | -      |
| ENSG00000227155 | -2.796355 | -2.316672 | 1 | 1 RP11-165F24.3 | -      |
| ENSG00000227201 | -2.796355 | -2.316672 | 1 | 1 CNN2P1        | -      |
| ENSG00000227234 | -2.796355 | -2.316672 | 1 | 1 SPANXB2       | -      |
| ENSG00000227368 | -2.796355 | -2.316672 | 1 | 1 AC079753.5    | K02208 |
| ENSG00000227502 | -2.796355 | -2.316672 | 1 | 1 RP1-249H1.4   | -      |
| ENSG00000227527 | -2.796355 | -2.316672 | 1 | 1 RP11-223A3.1  | -      |
| ENSG00000227542 | -2.796355 | -2.316672 | 1 | 1 AC092614.2    | -      |
| ENSG00000227659 | -2.796355 | -2.316672 | 1 | 1 CLYBL-AS2     | -      |
| ENSG00000227676 | -2.796355 | -2.316672 | 1 | 1 LINC01068     | -      |
| ENSG00000227712 | -2.796355 | -2.316672 | 1 | 1 RP11-418J17.3 | -      |
| ENSG00000227729 | -2.796355 | -2.316672 | 1 | 1 RD3L          | -      |
| ENSG00000227744 | -2.796355 | -2.316672 | 1 | 1 AC114788.2    | -      |
| ENSG00000227765 | -2.796355 | -2.316672 | 1 | 1 RP11-162O12.2 | K12757 |
| ENSG00000227821 | -2.796355 | -2.316672 | 1 | 1 AL392086.1    | -      |
| ENSG00000227845 | -2.796355 | -2.316672 | 1 | 1 RP11-184B22.2 | K09535 |
| ENSG00000227852 | -2.796355 | -2.316672 | 1 | 1 RP11-156G14.6 | K02980 |
| ENSG00000227877 | -2.796355 | -2.316672 | 1 | 1 LINC00948     | -      |
| ENSG00000227879 | -2.796355 | -2.316672 | 1 | 1 PSPC1P1       | -      |
| ENSG00000227910 | -2.796355 | -2.316672 | 1 | 1 RP11-73B2.6   | -      |
| ENSG00000227962 | -2.796355 | -2.316672 | 1 | 1 RP11-382D8.3  | K10575 |
| ENSG00000228033 | -2.796355 | -2.316672 | 1 | 1 AC010967.2    | -      |
| ENSG00000228063 | -2.796355 | -2.316672 | 1 | 1 RP11-135J2.4  | -      |
| ENSG00000228069 | -2.796355 | -2.316672 | 1 | 1 RP11-100G15.3 | K02262 |
| ENSG00000228079 | -2.796355 | -2.316672 | 1 | 1 AC012368.1    | -      |
| ENSG00000228086 | -2.796355 | -2.316672 | 1 | 1 RP5-837M10.4  | -      |
| ENSG00000228089 | -2.796355 | -2.316672 | 1 | 1 RP1-197O17.2  | -      |
| ENSG00000228100 | -2.796355 | -2.316672 | 1 | 1 AC016912.3    | -      |
| ENSG00000228107 | -2.796355 | -2.316672 | 1 | 1 AP000692.9    | -      |
| ENSG00000228113 | -2.796355 | -2.316672 | 1 | 1 AC003991.3    | -      |
| ENSG00000228125 | -2.796355 | -2.316672 | 1 | 1 RP11-516A11.3 | -      |
| ENSG00000228149 | -2.796355 | -2.316672 | 1 | 1 RPL3P1        | K02925 |
| ENSG00000228153 | -2.796355 | -2.316672 | 1 | 1 RP11-23I7.1   | -      |
| ENSG00000228169 | -2.796355 | -2.316672 | 1 | 1 PPIAP19       | K03767 |
| ENSG00000228221 | -2.796355 | -2.316672 | 1 | 1 LINC00578     | -      |
| ENSG00000228242 | -2.796355 | -2.316672 | 1 | 1 AC093495.4    | -      |
| ENSG00000228292 | -2.796355 | -2.316672 | 1 | 1 RP11-220I1.4  | K02889 |

|                 |           |           |   |                  |        |
|-----------------|-----------|-----------|---|------------------|--------|
| ENSG00000228313 | -2.796355 | -2.316672 | 1 | 1 CTD-2555K7.4   | -      |
| ENSG00000228317 | -2.796355 | -2.316672 | 1 | 1 RP11-235C23.5  | -      |
| ENSG00000228330 | -2.796355 | -2.316672 | 1 | 1 RP11-730A19.5  | K02257 |
| ENSG00000228404 | -2.796355 | -2.316672 | 1 | 1 AP001468.58    | -      |
| ENSG00000228414 | -2.796355 | -2.316672 | 1 | 1 AC010733.4     | -      |
| ENSG00000228422 | -2.796355 | -2.316672 | 1 | 1 LINC00687      | -      |
| ENSG00000228546 | -2.796355 | -2.316672 | 1 | 1 CTA-313A17.3   | K10858 |
| ENSG00000228549 | -2.796355 | -2.316672 | 1 | 1 U1             | -      |
| ENSG00000228614 | -2.796355 | -2.316672 | 1 | 1 RP13-476E20.1  | -      |
| ENSG00000228625 | -2.796355 | -2.316672 | 1 | 1 RP11-1B20.1    | -      |
| ENSG00000228700 | -2.796355 | -2.316672 | 1 | 1 RP11-155G14.1  | K02922 |
| ENSG00000228729 | -2.796355 | -2.316672 | 1 | 1 RP11-211A18.2  | -      |
| ENSG00000228759 | -2.796355 | -2.316672 | 1 | 1 FAF2P1         | K18726 |
| ENSG00000228768 | -2.796355 | -2.316672 | 1 | 1 AC003101.1     | -      |
| ENSG00000228791 | -2.796355 | -2.316672 | 1 | 1 THRB-AS1       | -      |
| ENSG00000228808 | -2.796355 | -2.316672 | 1 | 1 HMGB3P4        | -      |
| ENSG00000228838 | -2.796355 | -2.316672 | 1 | 1 RP4-784A16.2   | -      |
| ENSG00000228972 | -2.796355 | -2.316672 | 1 | 1 RP1-86D1.2     | -      |
| ENSG00000229007 | -2.796355 | -2.316672 | 1 | 1 EXOSC3P1       | K03681 |
| ENSG00000229016 | -2.796355 | -2.316672 | 1 | 1 RP11-224O19.4  | -      |
| ENSG00000229018 | -2.796355 | -2.316672 | 1 | 1 RP11-313P13.3  | K10858 |
| ENSG00000229028 | -2.796355 | -2.316672 | 1 | 1 KRT223P        | K07604 |
| ENSG00000229044 | -2.796355 | -2.316672 | 1 | 1 RP11-266K22.2  | -      |
| ENSG00000229048 | -2.796355 | -2.316672 | 1 | 1 DUTP1          | K01520 |
| ENSG00000229081 | -2.796355 | -2.316672 | 1 | 1 LINC01165      | -      |
| ENSG00000229107 | -2.796355 | -2.316672 | 1 | 1 ABHD17AP4      | -      |
| ENSG00000229161 | -2.796355 | -2.316672 | 1 | 1 TCP1P1         | K09493 |
| ENSG00000229221 | -2.796355 | -2.316672 | 1 | 1 HNRNPA1P66     | K12741 |
| ENSG00000229228 | -2.796355 | -2.316672 | 1 | 1 LINC00582      | -      |
| ENSG00000229251 | -2.796355 | -2.316672 | 1 | 1 HNRNPA1P8      | K12741 |
| ENSG00000229256 | -2.796355 | -2.316672 | 1 | 1 ST13P13        | K09560 |
| ENSG00000229356 | -2.796355 | -2.316672 | 1 | 1 LRRC3-AS1      | -      |
| ENSG00000229368 | -2.796355 | -2.316672 | 1 | 1 AC090587.4     | -      |
| ENSG00000229372 | -2.796355 | -2.316672 | 1 | 1 SZT2-AS1       | -      |
| ENSG00000229393 | -2.796355 | -2.316672 | 1 | 1 RP3-395M20.3   | -      |
| ENSG00000229409 | -2.796355 | -2.316672 | 1 | 1 RP11-494O16.3  | -      |
| ENSG00000229414 | -2.796355 | -2.316672 | 1 | 1 KCNQ1-AS1      | -      |
| ENSG00000229427 | -2.796355 | -2.316672 | 1 | 1 ANKRD26P4      | -      |
| ENSG00000229473 | -2.796355 | -2.316672 | 1 | 1 RGS17P1        | K16449 |
| ENSG00000229491 | -2.796355 | -2.316672 | 1 | 1 RP11-342D14.1  | -      |
| ENSG00000229530 | -2.796355 | -2.316672 | 1 | 1 RP11-62C3.8    | K08120 |
| ENSG00000229569 | -2.796355 | -2.316672 | 1 | 1 RP11-481G8.2   | -      |
| ENSG00000229635 | -2.796355 | -2.316672 | 1 | 1 RP4-713B5.2    | K03362 |
| ENSG00000229637 | -2.796355 | -2.316672 | 1 | 1 PRAC2          | -      |
| ENSG00000229683 | -2.796355 | -2.316672 | 1 | 1 ASN5P5         | K01953 |
| ENSG00000229703 | -2.796355 | -2.316672 | 1 | 1 XX-CR54.1      | -      |
| ENSG00000229758 | -2.796355 | -2.316672 | 1 | 1 DYNLT3P2       | K10420 |
| ENSG00000229780 | -2.796355 | -2.316672 | 1 | 1 UBE2Q1-AS1     | -      |
| ENSG00000229786 | -2.796355 | -2.316672 | 1 | 1 SNRPF2         | K11098 |
| ENSG00000229795 | -2.796355 | -2.316672 | 1 | 1 RPS21P1        | K02971 |
| ENSG00000229832 | -2.796355 | -2.316672 | 1 | 1 RP11-384C4.2   | -      |
| ENSG00000229893 | -2.796355 | -2.316672 | 1 | 1 AC004549.6     | -      |
| ENSG00000229894 | -2.796355 | -2.316672 | 1 | 1 GK3P           | K00864 |
| ENSG00000229920 | -2.796355 | -2.316672 | 1 | 1 RPS4XP5        | K02987 |
| ENSG00000229926 | -2.796355 | -2.316672 | 1 | 1 RP11-424E7.3   | K05073 |
| ENSG00000229954 | -2.796355 | -2.316672 | 1 | 1 MTND2P2        | -      |
| ENSG00000229964 | -2.796355 | -2.316672 | 1 | 1 RP11-135A1.3   | -      |
| ENSG00000229999 | -2.796355 | -2.316672 | 1 | 1 RP5-1042K10.10 | -      |



|                 |           |           |   |                  |        |
|-----------------|-----------|-----------|---|------------------|--------|
| ENSG00000230021 | -2.796355 | -2.316672 | 1 | 1 RP5-857K21.4   | -      |
| ENSG00000230058 | -2.796355 | -2.316672 | 1 | 1 RP11-172E9.2   | -      |
| ENSG00000230068 | -2.796355 | -2.316672 | 1 | 1 CDC42-IT1      | -      |
| ENSG00000230084 | -2.796355 | -2.316672 | 1 | 1 RP4-613B23.1   | -      |
| ENSG00000230092 | -2.796355 | -2.316672 | 1 | 1 RP11-206L10.8  | K10305 |
| ENSG00000230098 | -2.796355 | -2.316672 | 1 | 1 TCERG1L-AS1    | -      |
| ENSG00000230133 | -2.796355 | -2.316672 | 1 | 1 RP5-1100I6.2   | -      |
| ENSG00000230201 | -2.796355 | -2.316672 | 1 | 1 ATP6V0CP1      | K02155 |
| ENSG00000230207 | -2.796355 | -2.316672 | 1 | 1 RPL4P5         | K02930 |
| ENSG00000230289 | -2.796355 | -2.316672 | 1 | 1 RP11-334J6.6   | -      |
| ENSG00000230304 | -2.796355 | -2.316672 | 1 | 1 C1CP6          | K16941 |
| ENSG00000230305 | -2.796355 | -2.316672 | 1 | 1 AC004980.9     | K10858 |
| ENSG00000230310 | -2.796355 | -2.316672 | 1 | 1 CTD-2192J16.11 | -      |
| ENSG00000230319 | -2.796355 | -2.316672 | 1 | 1 AL022476.2     | -      |
| ENSG00000230325 | -2.796355 | -2.316672 | 1 | 1 RP11-385F5.4   | -      |
| ENSG00000230359 | -2.796355 | -2.316672 | 1 | 1 TPI1P2         | K01803 |
| ENSG00000230368 | -2.796355 | -2.316672 | 1 | 1 FAM41C         | -      |
| ENSG00000230399 | -2.796355 | -2.316672 | 1 | 1 RBBP8P1        | -      |
| ENSG00000230426 | -2.796355 | -2.316672 | 1 | 1 ERVMER61-1     | -      |
| ENSG00000230454 | -2.796355 | -2.316672 | 1 | 1 U73166.2       | -      |
| ENSG00000230530 | -2.796355 | -2.316672 | 1 | 1 LIMD1-AS1      | -      |
| ENSG00000230561 | -2.796355 | -2.316672 | 1 | 1 CTC-228N24.1   | -      |
| ENSG00000230570 | -2.796355 | -2.316672 | 1 | 1 RP11-69L16.6   | -      |
| ENSG00000230585 | -2.796355 | -2.316672 | 1 | 1 PHBP12         | K17080 |
| ENSG00000230592 | -2.796355 | -2.316672 | 1 | 1 RPSAP8         | K02998 |
| ENSG00000230593 | -2.796355 | -2.316672 | 1 | 1 AC090804.1     | K03767 |
| ENSG00000230631 | -2.796355 | -2.316672 | 1 | 1 RP11-359N11.1  | -      |
| ENSG00000230676 | -2.796355 | -2.316672 | 1 | 1 RP11-65J3.3    | -      |
| ENSG00000230697 | -2.796355 | -2.316672 | 1 | 1 AC097635.4     | K14324 |
| ENSG00000230734 | -2.796355 | -2.316672 | 1 | 1 RPL10P3        | K02866 |
| ENSG00000230753 | -2.796355 | -2.316672 | 1 | 1 RP4-553F4.6    | -      |
| ENSG00000230773 | -2.796355 | -2.316672 | 1 | 1 AC079807.4     | -      |
| ENSG00000230787 | -2.796355 | -2.316672 | 1 | 1 PSAT1P3        | K00831 |
| ENSG00000230835 | -2.796355 | -2.316672 | 1 | 1 AP001187.11    | -      |
| ENSG00000230849 | -2.796355 | -2.316672 | 1 | 1 GOT2P2         | K14455 |
| ENSG00000230894 | -2.796355 | -2.316672 | 1 | 1 RP11-67K19.3   | -      |
| ENSG00000230902 | -2.796355 | -2.316672 | 1 | 1 FAM204CP       | -      |
| ENSG00000230939 | -2.796355 | -2.316672 | 1 | 1 RP11-314C16.1  | -      |
| ENSG00000231006 | -2.796355 | -2.316672 | 1 | 1 RPL7P32        | K02937 |
| ENSG00000231035 | -2.796355 | -2.316672 | 1 | 1 RPL7L1P9       | -      |
| ENSG00000231105 | -2.796355 | -2.316672 | 1 | 1 RP5-1071N3.1   | -      |
| ENSG00000231171 | -2.796355 | -2.316672 | 1 | 1 LINC01098      | K11504 |
| ENSG00000231172 | -2.796355 | -2.316672 | 1 | 1 AC007099.1     | -      |
| ENSG00000231173 | -2.796355 | -2.316672 | 1 | 1 AC116609.3     | -      |
| ENSG00000231181 | -2.796355 | -2.316672 | 1 | 1 RP13-15M17.1   | K02940 |
| ENSG00000231289 | -2.796355 | -2.316672 | 1 | 1 RP11-782C8.6   | K02256 |
| ENSG00000231341 | -2.796355 | -2.316672 | 1 | 1 VDACP6         | K05862 |
| ENSG00000231344 | -2.796355 | -2.316672 | 1 | 1 RP3-426I6.2    | -      |
| ENSG00000231367 | -2.796355 | -2.316672 | 1 | 1 AC016995.3     | -      |
| ENSG00000231383 | -2.796355 | -2.316672 | 1 | 1 FGF12-AS1      | -      |
| ENSG00000231416 | -2.796355 | -2.316672 | 1 | 1 RP11-422P24.9  | K02915 |
| ENSG00000231435 | -2.796355 | -2.316672 | 1 | 1 AC011747.3     | -      |
| ENSG00000231464 | -2.796355 | -2.316672 | 1 | 1 AC024937.4     | K15425 |
| ENSG00000231536 | -2.796355 | -2.316672 | 1 | 1 AC123886.2     | -      |
| ENSG00000231651 | -2.796355 | -2.316672 | 1 | 1 DLG3-AS1       | -      |
| ENSG00000231709 | -2.796355 | -2.316672 | 1 | 1 RP5-857K21.1   | -      |
| ENSG00000231816 | -2.796355 | -2.316672 | 1 | 1 RP4-782L23.1   | -      |
| ENSG00000231888 | -2.796355 | -2.316672 | 1 | 1 MTND5P15       | K03883 |

|                 |           |           |   |                 |        |
|-----------------|-----------|-----------|---|-----------------|--------|
| ENSG00000231905 | -2.796355 | -2.316672 | 1 | 1 SETP10        | K11290 |
| ENSG00000231920 | -2.796355 | -2.316672 | 1 | 1 NEBL-AS1      | -      |
| ENSG00000231929 | -2.796355 | -2.316672 | 1 | 1 HMGB3P31      | K11296 |
| ENSG00000232063 | -2.796355 | -2.316672 | 1 | 1 RP11-307E17.8 | -      |
| ENSG00000232075 | -2.796355 | -2.316672 | 1 | 1 MRPL35P2      | K02916 |
| ENSG00000232218 | -2.796355 | -2.316672 | 1 | 1 RP1-149A16.16 | -      |
| ENSG00000232259 | -2.796355 | -2.316672 | 1 | 1 RP11-4C20.3   | -      |
| ENSG00000232260 | -2.796355 | -2.316672 | 1 | 1 BTF3L4P1      | K01527 |
| ENSG00000232270 | -2.796355 | -2.316672 | 1 | 1 INTS4L2       | K13141 |
| ENSG00000232439 | -2.796355 | -2.316672 | 1 | 1 RPL18AP7      | K02882 |
| ENSG00000232454 | -2.796355 | -2.316672 | 1 | 1 RP11-3J10.7   | K02946 |
| ENSG00000232504 | -2.796355 | -2.316672 | 1 | 1 AC105053.4    | -      |
| ENSG00000232536 | -2.796355 | -2.316672 | 1 | 1 RP11-74C1.4   | -      |
| ENSG00000232540 | -2.796355 | -2.316672 | 1 | 1 RPL36P19      | -      |
| ENSG00000232553 | -2.796355 | -2.316672 | 1 | 1 AC006026.10   | K08823 |
| ENSG00000232555 | -2.796355 | -2.316672 | 1 | 1 AC104088.1    | -      |
| ENSG00000232560 | -2.796355 | -2.316672 | 1 | 1 C21orf37      | -      |
| ENSG00000232571 | -2.796355 | -2.316672 | 1 | 1 RP11-435B5.2  | K02256 |
| ENSG00000232587 | -2.796355 | -2.316672 | 1 | 1 EEF1A1P3      | K03231 |
| ENSG00000232709 | -2.796355 | -2.316672 | 1 | 1 MARK2P9       | -      |
| ENSG00000232724 | -2.796355 | -2.316672 | 1 | 1 AC111186.1    | -      |
| ENSG00000232792 | -2.796355 | -2.316672 | 1 | 1 FTH1P25       | K18495 |
| ENSG00000232909 | -2.796355 | -2.316672 | 1 | 1 RP3-510O8.4   | -      |
| ENSG00000232938 | -2.796355 | -2.316672 | 1 | 1 AC139099.3    | K02893 |
| ENSG00000233010 | -2.796355 | -2.316672 | 1 | 1 RPEP4         | K01783 |
| ENSG00000233040 | -2.796355 | -2.316672 | 1 | 1 FAM204BP      | -      |
| ENSG00000233068 | -2.796355 | -2.316672 | 1 | 1 RP1-140K8.1   | -      |
| ENSG00000233072 | -2.796355 | -2.316672 | 1 | 1 RPS15AP6      | K02957 |
| ENSG00000233096 | -2.796355 | -2.316672 | 1 | 1 RP11-520A21.1 | -      |
| ENSG00000233220 | -2.796355 | -2.316672 | 1 | 1 LINC00167     | -      |
| ENSG00000233319 | -2.796355 | -2.316672 | 1 | 1 PPIAP32       | K03767 |
| ENSG00000233327 | -2.796355 | -2.316672 | 1 | 1 USP32P2       | K11837 |
| ENSG00000233330 | -2.796355 | -2.316672 | 1 | 1 RP1-12G14.7   | -      |
| ENSG00000233401 | -2.796355 | -2.316672 | 1 | 1 PRKAR1AP      | K04739 |
| ENSG00000233455 | -2.796355 | -2.316672 | 1 | 1 RP4-667H12.4  | K03469 |
| ENSG00000233590 | -2.796355 | -2.316672 | 1 | 1 RP11-153K11.3 | -      |
| ENSG00000233601 | -2.796355 | -2.316672 | 1 | 1 NCOR1P3       | K04650 |
| ENSG00000233614 | -2.796355 | -2.316672 | 1 | 1 DDX11L10      | K11273 |
| ENSG00000233647 | -2.796355 | -2.316672 | 1 | 1 RP11-8J9.1    | -      |
| ENSG00000233671 | -2.796355 | -2.316672 | 1 | 1 AC083899.1    | K11506 |
| ENSG00000233775 | -2.796355 | -2.316672 | 1 | 1 RP4-811H24.9  | -      |
| ENSG00000233845 | -2.796355 | -2.316672 | 1 | 1 AC093732.1    | -      |
| ENSG00000233929 | -2.796355 | -2.316672 | 1 | 1 MT1XP1        | K14739 |
| ENSG00000233996 | -2.796355 | -2.316672 | 1 | 1 AC013439.4    | K15601 |
| ENSG00000234004 | -2.796355 | -2.316672 | 1 | 1 RP11-543B16.1 | K02975 |
| ENSG00000234030 | -2.796355 | -2.316672 | 1 | 1 TMEM97P1      | -      |
| ENSG00000234041 | -2.796355 | -2.316672 | 1 | 1 RP11-345I18.1 | -      |
| ENSG00000234065 | -2.796355 | -2.316672 | 1 | 1 MTND4P26      | -      |
| ENSG00000234093 | -2.796355 | -2.316672 | 1 | 1 RPS15AP11     | K02957 |
| ENSG00000234185 | -2.796355 | -2.316672 | 1 | 1 RP5-1132H15.1 | -      |
| ENSG00000234193 | -2.796355 | -2.316672 | 1 | 1 AC097461.4    | -      |
| ENSG00000234197 | -2.796355 | -2.316672 | 1 | 1 ETV5-AS1      | -      |
| ENSG00000234222 | -2.796355 | -2.316672 | 1 | 1 RP11-315I20.1 | -      |
| ENSG00000234252 | -2.796355 | -2.316672 | 1 | 1 AC007308.6    | -      |
| ENSG00000234263 | -2.796355 | -2.316672 | 1 | 1 RP3-325F22.3  | -      |
| ENSG00000234332 | -2.796355 | -2.316672 | 1 | 1 BCAS2P2       | K12861 |
| ENSG00000234377 | -2.796355 | -2.316672 | 1 | 1 RNF219-AS1    | -      |
| ENSG00000234428 | -2.796355 | -2.316672 | 1 | 1 RP11-666F17.1 | -      |

|                 |           |           |   |                 |        |
|-----------------|-----------|-----------|---|-----------------|--------|
| ENSG00000234465 | -2.796355 | -2.316672 | 1 | 1 PINLYP        | -      |
| ENSG00000234520 | -2.796355 | -2.316672 | 1 | 1 AC018464.3    | -      |
| ENSG00000234536 | -2.796355 | -2.316672 | 1 | 1 AC096582.7    | K13051 |
| ENSG00000234548 | -2.796355 | -2.316672 | 1 | 1 RP11-78H24.1  | -      |
| ENSG00000234556 | -2.796355 | -2.316672 | 1 | 1 LINC00701     | -      |
| ENSG00000234589 | -2.796355 | -2.316672 | 1 | 1 RP11-253E3.1  | K02872 |
| ENSG00000234610 | -2.796355 | -2.316672 | 1 | 1 LINC00624     | -      |
| ENSG00000234650 | -2.796355 | -2.316672 | 1 | 1 PCCA-AS1      | -      |
| ENSG00000234693 | -2.796355 | -2.316672 | 1 | 1 RP4-530I15.6  | -      |
| ENSG00000234711 | -2.796355 | -2.316672 | 1 | 1 TUBB8P11      | K07375 |
| ENSG00000234719 | -2.796355 | -2.316672 | 1 | 1 RP11-166B2.1  | -      |
| ENSG00000234782 | -2.796355 | -2.316672 | 1 | 1 TPT1P9        | -      |
| ENSG00000234788 | -2.796355 | -2.316672 | 1 | 1 HSPA8P3       | -      |
| ENSG00000234793 | -2.796355 | -2.316672 | 1 | 1 AC114730.7    | -      |
| ENSG00000234805 | -2.796355 | -2.316672 | 1 | 1 AC090505.5    | -      |
| ENSG00000234806 | -2.796355 | -2.316672 | 1 | 1 RP11-9E13.4   | K02898 |
| ENSG00000234832 | -2.796355 | -2.316672 | 1 | 1 RP3-322G13.7  | -      |
| ENSG00000234999 | -2.796355 | -2.316672 | 1 | 1 AC004016.2    | K11095 |
| ENSG00000235008 | -2.796355 | -2.316672 | 1 | 1 RP3-497J21.1  | K13197 |
| ENSG00000235021 | -2.796355 | -2.316672 | 1 | 1 RP11-439E19.7 | -      |
| ENSG00000235028 | -2.796355 | -2.316672 | 1 | 1 HMGN1P30      | K11299 |
| ENSG00000235045 | -2.796355 | -2.316672 | 1 | 1 RPL7P8        | K02937 |
| ENSG00000235065 | -2.796355 | -2.316672 | 1 | 1 RPL24P2       | K02896 |
| ENSG00000235072 | -2.796355 | -2.316672 | 1 | 1 AC012074.2    | -      |
| ENSG00000235085 | -2.796355 | -2.316672 | 1 | 1 AC091153.4    | -      |
| ENSG00000235129 | -2.796355 | -2.316672 | 1 | 1 FABP7P2       | K08756 |
| ENSG00000235185 | -2.796355 | -2.316672 | 1 | 1 RP5-1056L3.1  | -      |
| ENSG00000235213 | -2.796355 | -2.316672 | 1 | 1 OR6E1P        | K04257 |
| ENSG00000235263 | -2.796355 | -2.316672 | 1 | 1 RP13-392I16.1 | -      |
| ENSG00000235297 | -2.796355 | -2.316672 | 1 | 1 FAUP1         | K02983 |
| ENSG00000235321 | -2.796355 | -2.316672 | 1 | 1 AC007556.3    | -      |
| ENSG00000235328 | -2.796355 | -2.316672 | 1 | 1 AC006946.12   | K02910 |
| ENSG00000235411 | -2.796355 | -2.316672 | 1 | 1 AC007041.2    | -      |
| ENSG00000235413 | -2.796355 | -2.316672 | 1 | 1 KRT18P63      | K07604 |
| ENSG00000235480 | -2.796355 | -2.316672 | 1 | 1 RP11-363D14.1 | -      |
| ENSG00000235613 | -2.796355 | -2.316672 | 1 | 1 NSRP1P1       | K13206 |
| ENSG00000235674 | -2.796355 | -2.316672 | 1 | 1 LDHAP2        | K00016 |
| ENSG00000235700 | -2.796355 | -2.316672 | 1 | 1 CYCSP52       | K08738 |
| ENSG00000235733 | -2.796355 | -2.316672 | 1 | 1 RP3-522P13.3  | -      |
| ENSG00000235776 | -2.796355 | -2.316672 | 1 | 1 AC000089.3    | K02936 |
| ENSG00000235840 | -2.796355 | -2.316672 | 1 | 1 AC012363.13   | -      |
| ENSG00000235843 | -2.796355 | -2.316672 | 1 | 1 RP13-16H11.5  | -      |
| ENSG00000235848 | -2.796355 | -2.316672 | 1 | 1 RMDN2-AS1     | -      |
| ENSG00000235861 | -2.796355 | -2.316672 | 1 | 1 AC005237.2    | -      |
| ENSG00000235862 | -2.796355 | -2.316672 | 1 | 1 RP11-338C15.5 | -      |
| ENSG00000235884 | -2.796355 | -2.316672 | 1 | 1 LINC00941     | -      |
| ENSG00000235885 | -2.796355 | -2.316672 | 1 | 1 AC023115.2    | -      |
| ENSG00000235903 | -2.796355 | -2.316672 | 1 | 1 CPB2-AS1      | -      |
| ENSG00000236060 | -2.796355 | -2.316672 | 1 | 1 HSPB1P1       | K04455 |
| ENSG00000236086 | -2.796355 | -2.316672 | 1 | 1 HMGN2P28      | K11300 |
| ENSG00000236110 | -2.796355 | -2.316672 | 1 | 1 OR2AM1P       | K17461 |
| ENSG00000236119 | -2.796355 | -2.316672 | 1 | 1 AP000688.15   | -      |
| ENSG00000236159 | -2.796355 | -2.316672 | 1 | 1 RP3-343K2.4   | -      |
| ENSG00000236229 | -2.796355 | -2.316672 | 1 | 1 VEZF1P1       | -      |
| ENSG00000236238 | -2.796355 | -2.316672 | 1 | 1 AC093106.4    | K02955 |
| ENSG00000236254 | -2.796355 | -2.316672 | 1 | 1 MTND4P14      | K03881 |
| ENSG00000236296 | -2.796355 | -2.316672 | 1 | 1 GUSBP5        | K01195 |
| ENSG00000236297 | -2.796355 | -2.316672 | 1 | 1 RP11-175P19.2 | K03231 |

|                 |           |           |   |                    |        |
|-----------------|-----------|-----------|---|--------------------|--------|
| ENSG00000236299 | -2.796355 | -2.316672 | 1 | 1 RP11-340I6.7     | -      |
| ENSG00000236317 | -2.796355 | -2.316672 | 1 | 1 RP11-348H3.5     | K02979 |
| ENSG00000236324 | -2.796355 | -2.316672 | 1 | 1 RP3-403L10.3     | -      |
| ENSG00000236391 | -2.796355 | -2.316672 | 1 | 1 AC092573.2       | K02271 |
| ENSG00000236427 | -2.796355 | -2.316672 | 1 | 1 RP11-107M16.2    | -      |
| ENSG00000236438 | -2.796355 | -2.316672 | 1 | 1 FAM157A          | -      |
| ENSG00000236456 | -2.796355 | -2.316672 | 1 | 1 RP4-785G19.2     | -      |
| ENSG00000236489 | -2.796355 | -2.316672 | 1 | 1 RP11-537I16.2    | K02915 |
| ENSG00000236542 | -2.796355 | -2.316672 | 1 | 1 MED28P7          | K15141 |
| ENSG00000236548 | -2.796355 | -2.316672 | 1 | 1 RP11-510H23.1    | -      |
| ENSG00000236609 | -2.796355 | -2.316672 | 1 | 1 ZNF853           | K09228 |
| ENSG00000236677 | -2.796355 | -2.316672 | 1 | 1 AP000688.11      | -      |
| ENSG00000236780 | -2.796355 | -2.316672 | 1 | 1 AC078941.1       | -      |
| ENSG00000236804 | -2.796355 | -2.316672 | 1 | 1 RPS3AP12         | K02984 |
| ENSG00000236811 | -2.796355 | -2.316672 | 1 | 1 GAPDHP2          | K00134 |
| ENSG00000236856 | -2.796355 | -2.316672 | 1 | 1 AC105393.1       | -      |
| ENSG00000236869 | -2.796355 | -2.316672 | 1 | 1 RP11-944L7.4     | -      |
| ENSG00000236876 | -2.796355 | -2.316672 | 1 | 1 TMSB4XP1         | K05764 |
| ENSG00000236892 | -2.796355 | -2.316672 | 1 | 1 RP11-482E14.2    | -      |
| ENSG00000236896 | -2.796355 | -2.316672 | 1 | 1 RP11-535C21.3    | -      |
| ENSG00000236905 | -2.796355 | -2.316672 | 1 | 1 RP11-348H3.2     | K02989 |
| ENSG00000236953 | -2.796355 | -2.316672 | 1 | 1 ZDHHC20-IT1      | -      |
| ENSG00000237119 | -2.796355 | -2.316672 | 1 | 1 LINC01056        | -      |
| ENSG00000237166 | -2.796355 | -2.316672 | 1 | 1 AC007163.3       | -      |
| ENSG00000237174 | -2.796355 | -2.316672 | 1 | 1 RP11-415D17.3    | -      |
| ENSG00000237178 | -2.796355 | -2.316672 | 1 | 1 AC019080.1       | K11253 |
| ENSG00000237200 | -2.796355 | -2.316672 | 1 | 1 ZBTB40-IT1       | -      |
| ENSG00000237212 | -2.796355 | -2.316672 | 1 | 1 RP11-569G13.2    | -      |
| ENSG00000237260 | -2.796355 | -2.316672 | 1 | 1 AC073069.2       | K03767 |
| ENSG00000237280 | -2.796355 | -2.316672 | 1 | 1 RP11-96C23.9     | -      |
| ENSG00000237281 | -2.796355 | -2.316672 | 1 | 1 AC021016.8       | -      |
| ENSG00000237283 | -2.796355 | -2.316672 | 1 | 1 RP11-316I3.1     | -      |
| ENSG00000237291 | -2.796355 | -2.316672 | 1 | 1 RP11-782C8.4     | -      |
| ENSG00000237331 | -2.796355 | -2.316672 | 1 | 1 XIAP-AS1         | -      |
| ENSG00000237404 | -2.796355 | -2.316672 | 1 | 1 RP3-471C18.2     | -      |
| ENSG00000237543 | -2.796355 | -2.316672 | 1 | 1 RP11-58A12.3     | -      |
| ENSG00000237551 | -2.796355 | -2.316672 | 1 | 1 AC096775.2       | K02889 |
| ENSG00000237641 | -2.796355 | -2.316672 | 1 | 1 RP11-690I21.1    | -      |
| ENSG00000237664 | -2.796355 | -2.316672 | 1 | 1 LINC00316        | -      |
| ENSG00000237668 | -2.796355 | -2.316672 | 1 | 1 RPS15AP38        | K02957 |
| ENSG00000237729 | -2.796355 | -2.316672 | 1 | 1 AC002075.4       | K02978 |
| ENSG00000237732 | -2.796355 | -2.316672 | 1 | 1 AC010980.2       | K09381 |
| ENSG00000237768 | -2.796355 | -2.316672 | 1 | 1 RP11-344N10.2    | -      |
| ENSG00000237772 | -2.796355 | -2.316672 | 1 | 1 AC092620.3       | -      |
| ENSG00000237827 | -2.796355 | -2.316672 | 1 | 1 RP11-332O19.2    | K02957 |
| ENSG00000237840 | -2.796355 | -2.316672 | 1 | 1 FAM21FP          | K18462 |
| ENSG00000237852 | -2.796355 | -2.316672 | 1 | 1 RP4-630A11.3     | -      |
| ENSG00000237868 | -2.796355 | -2.316672 | 1 | 1 AC097533.1       | K10666 |
| ENSG00000237899 | -2.796355 | -2.316672 | 1 | 1 RP4-739H11.3     | -      |
| ENSG00000237927 | -2.796355 | -2.316672 | 1 | 1 RP3-393E18.2     | -      |
| ENSG00000237982 | -2.796355 | -2.316672 | 1 | 1 RP11-815I22.1    | -      |
| ENSG00000238009 | -2.796355 | -2.316672 | 1 | 1 RP11-34P13.7     | -      |
| ENSG00000238015 | -2.796355 | -2.316672 | 1 | 1 RP4-641G12.3     | K02894 |
| ENSG00000238043 | -2.796355 | -2.316672 | 1 | 1 RP11-699L21.2    | -      |
| ENSG00000238049 | -2.796355 | -2.316672 | 1 | 1 LLOXNC01-105G4.3 | -      |
| ENSG00000238097 | -2.796355 | -2.316672 | 1 | 1 RP11-513G11.3    | -      |
| ENSG00000238113 | -2.796355 | -2.316672 | 1 | 1 RP11-262H14.1    | -      |
| ENSG00000238122 | -2.796355 | -2.316672 | 1 | 1 RP11-483I13.2    | -      |

|                 |           |           |   |                 |        |
|-----------------|-----------|-----------|---|-----------------|--------|
| ENSG00000238160 | -2.796355 | -2.316672 | 1 | 1 AC116366.5    | -      |
| ENSG00000238165 | -2.796355 | -2.316672 | 1 | 1 AC007560.1    | -      |
| ENSG00000238178 | -2.796355 | -2.316672 | 1 | 1 RP11-431J24.2 | -      |
| ENSG00000238181 | -2.796355 | -2.316672 | 1 | 1 AHCYP2        | K01251 |
| ENSG00000238199 | -2.796355 | -2.316672 | 1 | 1 UBE2V2P3      | K10704 |
| ENSG00000238220 | -2.796355 | -2.316672 | 1 | 1 AP000275.64   | -      |
| ENSG00000238244 | -2.796355 | -2.316672 | 1 | 1 GABARAPL3     | K08341 |
| ENSG00000238329 | -2.796355 | -2.316672 | 1 | 1 snoU13        | -      |
| ENSG00000238349 | -2.796355 | -2.316672 | 1 | 1 snoU13        | -      |
| ENSG00000238364 | -2.796355 | -2.316672 | 1 | 1 RNU7-140P     | -      |
| ENSG00000238541 | -2.796355 | -2.316672 | 1 | 1 snoU13        | -      |
| ENSG00000238569 | -2.796355 | -2.316672 | 1 | 1 snoU13        | -      |
| ENSG00000238683 | -2.796355 | -2.316672 | 1 | 1 snoU13        | -      |
| ENSG00000238777 | -2.796355 | -2.316672 | 1 | 1 RNU7-141P     | -      |
| ENSG00000238829 | -2.796355 | -2.316672 | 1 | 1 RNU7-45P      | -      |
| ENSG00000238835 | -2.796355 | -2.316672 | 1 | 1 SCARNA18      | -      |
| ENSG00000238886 | -2.796355 | -2.316672 | 1 | 1 SNORD121A     | -      |
| ENSG00000239035 | -2.796355 | -2.316672 | 1 | 1 snoU13        | -      |
| ENSG00000239043 | -2.796355 | -2.316672 | 1 | 1 SNORD127      | -      |
| ENSG00000239052 | -2.796355 | -2.316672 | 1 | 1 snoU13        | -      |
| ENSG00000239059 | -2.796355 | -2.316672 | 1 | 1 snoU13        | -      |
| ENSG00000239096 | -2.796355 | -2.316672 | 1 | 1 snoU13        | -      |
| ENSG00000239133 | -2.796355 | -2.316672 | 1 | 1 snoU13        | -      |
| ENSG00000239218 | -2.796355 | -2.316672 | 1 | 1 RPS20P22      | K02969 |
| ENSG00000239247 | -2.796355 | -2.316672 | 1 | 1 RN7SL589P     | -      |
| ENSG00000239474 | -2.796355 | -2.316672 | 1 | 1 KLHL41        | K10473 |
| ENSG00000239524 | -2.796355 | -2.316672 | 1 | 1 RPL32P34      | K02912 |
| ENSG00000239593 | -2.796355 | -2.316672 | 1 | 1 RP11-477J21.6 | -      |
| ENSG00000239627 | -2.796355 | -2.316672 | 1 | 1 RP11-124A7.1  | K02870 |
| ENSG00000239670 | -2.796355 | -2.316672 | 1 | 1 RP4-803A2.2   | K02981 |
| ENSG00000239791 | -2.796355 | -2.316672 | 1 | 1 AC002310.7    | -      |
| ENSG00000239830 | -2.796355 | -2.316672 | 1 | 1 RPS4XP22      | K02987 |
| ENSG00000239868 | -2.796355 | -2.316672 | 1 | 1 RN7SL34P      | -      |
| ENSG00000239908 | -2.796355 | -2.316672 | 1 | 1 RN7SL75P      | -      |
| ENSG00000240074 | -2.796355 | -2.316672 | 1 | 1 RPL9P30       | K02940 |
| ENSG00000240137 | -2.796355 | -2.316672 | 1 | 1 RP11-103G8.2  | -      |
| ENSG00000240233 | -2.796355 | -2.316672 | 1 | 1 RN7SL587P     | -      |
| ENSG00000240280 | -2.796355 | -2.316672 | 1 | 1 TCAM1P        | -      |
| ENSG00000240366 | -2.796355 | -2.316672 | 1 | 1 RPL36AP45     | K02929 |
| ENSG00000240418 | -2.796355 | -2.316672 | 1 | 1 CTD-2013N17.1 | K02981 |
| ENSG00000240436 | -2.796355 | -2.316672 | 1 | 1 RP11-95I19.1  | K02917 |
| ENSG00000240476 | -2.796355 | -2.316672 | 1 | 1 LINC00973     | -      |
| ENSG00000240549 | -2.796355 | -2.316672 | 1 | 1 THOC7-AS1     | -      |
| ENSG00000240775 | -2.796355 | -2.316672 | 1 | 1 RP11-170N16.2 | K02976 |
| ENSG00000240793 | -2.796355 | -2.316672 | 1 | 1 UBA52P8       | K02927 |
| ENSG00000240877 | -2.796355 | -2.316672 | 1 | 1 RN7SL521P     | -      |
| ENSG00000240915 | -2.796355 | -2.316672 | 1 | 1 RP11-659E9.2  | -      |
| ENSG00000240950 | -2.796355 | -2.316672 | 1 | 1 RP11-372E1.1  | K02938 |
| ENSG00000240966 | -2.796355 | -2.316672 | 1 | 1 RN7SL681P     | -      |
| ENSG00000240974 | -2.796355 | -2.316672 | 1 | 1 CTD-2024I7.1  | K02977 |
| ENSG00000241011 | -2.796355 | -2.316672 | 1 | 1 RP11-713C19.1 | -      |
| ENSG00000241026 | -2.796355 | -2.316672 | 1 | 1 CTD-2036J7.1  | K02889 |
| ENSG00000241035 | -2.796355 | -2.316672 | 1 | 1 RP11-689J19.1 | K02927 |
| ENSG00000241084 | -2.796355 | -2.316672 | 1 | 1 RP11-344B5.3  | -      |
| ENSG00000241111 | -2.796355 | -2.316672 | 1 | 1 RP11-129B22.1 | -      |
| ENSG00000241456 | -2.796355 | -2.316672 | 1 | 1 RP4-555L14.4  | -      |
| ENSG00000241489 | -2.796355 | -2.316672 | 1 | 1 IDS           | K01136 |
| ENSG00000241494 | -2.796355 | -2.316672 | 1 | 1 RP11-796G6.1  | K02898 |

|                 |           |           |   |                  |        |
|-----------------|-----------|-----------|---|------------------|--------|
| ENSG00000241570 | -2.796355 | -2.316672 | 1 | 1 RP11-372E1.6   | -      |
| ENSG00000241641 | -2.796355 | -2.316672 | 1 | 1 RPS23P6        | -      |
| ENSG00000241671 | -2.796355 | -2.316672 | 1 | 1 RP11-529G21.3  | -      |
| ENSG00000241765 | -2.796355 | -2.316672 | 1 | 1 RP11-159A18.1  | K02976 |
| ENSG00000241947 | -2.796355 | -2.316672 | 1 | 1 HNRNPA1P24     | K12741 |
| ENSG00000241959 | -2.796355 | -2.316672 | 1 | 1 RN7SL76P       | -      |
| ENSG00000241991 | -2.796355 | -2.316672 | 1 | 1 RP11-95I19.2   | -      |
| ENSG00000242104 | -2.796355 | -2.316672 | 1 | 1 RP11-340E6.1   | -      |
| ENSG00000242180 | -2.796355 | -2.316672 | 1 | 1 OR51B5         | K04257 |
| ENSG00000242258 | -2.796355 | -2.316672 | 1 | 1 LINC00996      | -      |
| ENSG00000242399 | -2.796355 | -2.316672 | 1 | 1 RPS20P23       | -      |
| ENSG00000242593 | -2.796355 | -2.316672 | 1 | 1 RP5-921G16.1   | -      |
| ENSG00000242607 | -2.796355 | -2.316672 | 1 | 1 RPS3AP34       | K02984 |
| ENSG00000242737 | -2.796355 | -2.316672 | 1 | 1 RP11-562A8.1   | K02969 |
| ENSG00000243004 | -2.796355 | -2.316672 | 1 | 1 AC005062.2     | -      |
| ENSG00000243116 | -2.796355 | -2.316672 | 1 | 1 RP11-564C24.1  | -      |
| ENSG00000243225 | -2.796355 | -2.316672 | 1 | 1 RP11-7F17.1    | K02942 |
| ENSG00000243333 | -2.796355 | -2.316672 | 1 | 1 RN7SL174P      | -      |
| ENSG00000243414 | -2.796355 | -2.316672 | 1 | 1 TICAM2         | K14825 |
| ENSG00000243508 | -2.796355 | -2.316672 | 1 | 1 RP11-775J23.2  | K09512 |
| ENSG00000243607 | -2.796355 | -2.316672 | 1 | 1 RPL35AP26      | K02917 |
| ENSG00000243649 | -2.796355 | -2.316672 | 1 | 1 CFB            | K01335 |
| ENSG00000243746 | -2.796355 | -2.316672 | 1 | 1 EEF1A1P10      | K03231 |
| ENSG00000243795 | -2.796355 | -2.316672 | 1 | 1 RP11-572M11.3  | -      |
| ENSG00000243797 | -2.796355 | -2.316672 | 1 | 1 CTB-111H14.1   | -      |
| ENSG00000243859 | -2.796355 | -2.316672 | 1 | 1 RPL5P17        | K02932 |
| ENSG00000243977 | -2.796355 | -2.316672 | 1 | 1 RP11-473P24.2  | K11253 |
| ENSG00000244104 | -2.796355 | -2.316672 | 1 | 1 RN7SL659P      | -      |
| ENSG00000244128 | -2.796355 | -2.316672 | 1 | 1 RP11-85M11.2   | -      |
| ENSG00000244307 | -2.796355 | -2.316672 | 1 | 1 RN7SL395P      | -      |
| ENSG00000244468 | -2.796355 | -2.316672 | 1 | 1 RP11-206M11.7  | -      |
| ENSG00000244491 | -2.796355 | -2.316672 | 1 | 1 RP3-508I15.18  | -      |
| ENSG00000244527 | -2.796355 | -2.316672 | 1 | 1 RP11-254G11.1  | K02889 |
| ENSG00000244588 | -2.796355 | -2.316672 | 1 | 1 RAD21L1        | -      |
| ENSG00000244618 | -2.796355 | -2.316672 | 1 | 1 RN7SL334P      | -      |
| ENSG00000244998 | -2.796355 | -2.316672 | 1 | 1 CTD-3064M3.4   | -      |
| ENSG00000245025 | -2.796355 | -2.316672 | 1 | 1 RP11-875O11.1  | -      |
| ENSG00000245598 | -2.796355 | -2.316672 | 1 | 1 DACT3-AS1      | -      |
| ENSG00000245719 | -2.796355 | -2.316672 | 1 | 1 RP11-34F13.2   | -      |
| ENSG00000246211 | -2.796355 | -2.316672 | 1 | 1 RP11-632K5.3   | -      |
| ENSG00000246763 | -2.796355 | -2.316672 | 1 | 1 RGMB-AS1       | -      |
| ENSG00000248079 | -2.796355 | -2.316672 | 1 | 1 DPH6-AS1       | -      |
| ENSG00000248156 | -2.796355 | -2.316672 | 1 | 1 RP11-12P19.1   | K14443 |
| ENSG00000248172 | -2.796355 | -2.316672 | 1 | 1 RP11-1094H24.3 | -      |
| ENSG00000248196 | -2.796355 | -2.316672 | 1 | 1 RP11-476C8.2   | K03648 |
| ENSG00000248334 | -2.796355 | -2.316672 | 1 | 1 WHAMMP2        | K09488 |
| ENSG00000248346 | -2.796355 | -2.316672 | 1 | 1 RP11-292D4.1   | -      |
| ENSG00000248405 | -2.796355 | -2.316672 | 1 | 1 PRR5-ARHGAP8   | K18470 |
| ENSG00000248491 | -2.796355 | -2.316672 | 1 | 1 RP11-125O18.1  | -      |
| ENSG00000248514 | -2.796355 | -2.316672 | 1 | 1 CTC-338M12.1   | -      |
| ENSG00000248546 | -2.796355 | -2.316672 | 1 | 1 ANP32C         | K18646 |
| ENSG00000248571 | -2.796355 | -2.316672 | 1 | 1 RP11-768B22.2  | -      |
| ENSG00000248656 | -2.796355 | -2.316672 | 1 | 1 RP11-255I10.2  | -      |
| ENSG00000248663 | -2.796355 | -2.316672 | 1 | 1 LINC00992      | -      |
| ENSG00000248729 | -2.796355 | -2.316672 | 1 | 1 RP11-531A21.3  | -      |
| ENSG00000248752 | -2.796355 | -2.316672 | 1 | 1 RP11-114J13.1  | -      |
| ENSG00000248753 | -2.796355 | -2.316672 | 1 | 1 CTC-276P9.2    | -      |
| ENSG00000248757 | -2.796355 | -2.316672 | 1 | 1 CTD-2193G5.1   | -      |

|                 |           |           |   |                 |        |
|-----------------|-----------|-----------|---|-----------------|--------|
| ENSG00000248925 | -2.796355 | -2.316672 | 1 | 1 CTD-2083E4.6  | -      |
| ENSG00000248936 | -2.796355 | -2.316672 | 1 | 1 RP11-36B15.1  | -      |
| ENSG00000248950 | -2.796355 | -2.316672 | 1 | 1 LDHBP3        | -      |
| ENSG00000249012 | -2.796355 | -2.316672 | 1 | 1 RP11-731D1.1  | -      |
| ENSG00000249020 | -2.796355 | -2.316672 | 1 | 1 SNORA58       | -      |
| ENSG00000249031 | -2.796355 | -2.316672 | 1 | 1 SUMO2P6       | K12160 |
| ENSG00000249047 | -2.796355 | -2.316672 | 1 | 1 COX6B1P5      | K02267 |
| ENSG00000249068 | -2.796355 | -2.316672 | 1 | 1 CTC-287O8.1   | K01231 |
| ENSG00000249201 | -2.796355 | -2.316672 | 1 | 1 CTD-3080P12.3 | -      |
| ENSG00000249230 | -2.796355 | -2.316672 | 1 | 1 CDH12P2       | K06804 |
| ENSG00000249346 | -2.796355 | -2.316672 | 1 | 1 LINC01016     | -      |
| ENSG00000249359 | -2.796355 | -2.316672 | 1 | 1 RP11-374A4.1  | -      |
| ENSG00000249388 | -2.796355 | -2.316672 | 1 | 1 RP11-834C11.6 | -      |
| ENSG00000249396 | -2.796355 | -2.316672 | 1 | 1 RP11-1C1.4    | -      |
| ENSG00000249412 | -2.796355 | -2.316672 | 1 | 1 CTC-563A5.2   | -      |
| ENSG00000249465 | -2.796355 | -2.316672 | 1 | 1 RBMXP4        | K12885 |
| ENSG00000249503 | -2.796355 | -2.316672 | 1 | 1 HMGNI1P16     | -      |
| ENSG00000249540 | -2.796355 | -2.316672 | 1 | 1 RP11-789L4.1  | K12834 |
| ENSG00000249609 | -2.796355 | -2.316672 | 1 | 1 RP11-635L1.3  | -      |
| ENSG00000249624 | -2.796355 | -2.316672 | 1 | 1 AP000295.9    | K05135 |
| ENSG00000249678 | -2.796355 | -2.316672 | 1 | 1 RP11-619J20.1 | -      |
| ENSG00000249753 | -2.796355 | -2.316672 | 1 | 1 RP11-415I12.3 | -      |
| ENSG00000249771 | -2.796355 | -2.316672 | 1 | 1 RP11-457P14.5 | -      |
| ENSG00000249831 | -2.796355 | -2.316672 | 1 | 1 RP11-4O3.2    | -      |
| ENSG00000249870 | -2.796355 | -2.316672 | 1 | 1 RP11-481C4.1  | -      |
| ENSG00000249934 | -2.796355 | -2.316672 | 1 | 1 RP11-466G12.3 | K09289 |
| ENSG00000249986 | -2.796355 | -2.316672 | 1 | 1 YWHAQP6       | K16197 |
| ENSG00000250050 | -2.796355 | -2.316672 | 1 | 1 MTND4P9       | -      |
| ENSG00000250075 | -2.796355 | -2.316672 | 1 | 1 RP11-584P21.2 | -      |
| ENSG00000250106 | -2.796355 | -2.316672 | 1 | 1 ANKRD33B-AS1  | -      |
| ENSG00000250111 | -2.796355 | -2.316672 | 1 | 1 AC107982.4    | K17299 |
| ENSG00000250241 | -2.796355 | -2.316672 | 1 | 1 RP11-9G1.3    | -      |
| ENSG00000250326 | -2.796355 | -2.316672 | 1 | 1 RP11-284M14.1 | -      |
| ENSG00000250330 | -2.796355 | -2.316672 | 1 | 1 CTC-422A18.2  | K08341 |
| ENSG00000250360 | -2.796355 | -2.316672 | 1 | 1 CTD-2089N3.1  | -      |
| ENSG00000250496 | -2.796355 | -2.316672 | 1 | 1 ABT1P1        | K14785 |
| ENSG00000250568 | -2.796355 | -2.316672 | 1 | 1 RP11-333E13.2 | K13126 |
| ENSG00000250599 | -2.796355 | -2.316672 | 1 | 1 AC064853.3    | K14610 |
| ENSG00000250624 | -2.796355 | -2.316672 | 1 | 1 RP11-93M12.1  | -      |
| ENSG00000250748 | -2.796355 | -2.316672 | 1 | 1 RP11-230G5.2  | -      |
| ENSG00000250762 | -2.796355 | -2.316672 | 1 | 1 RP1-313L4.4   | -      |
| ENSG00000250769 | -2.796355 | -2.316672 | 1 | 1 RP11-241F15.3 | -      |
| ENSG00000250869 | -2.796355 | -2.316672 | 1 | 1 RP11-453N18.1 | K17985 |
| ENSG00000250878 | -2.796355 | -2.316672 | 1 | 1 METTL21EP     | -      |
| ENSG00000250950 | -2.796355 | -2.316672 | 1 | 1 RP11-33B1.3   | -      |
| ENSG00000250961 | -2.796355 | -2.316672 | 1 | 1 CTD-2023N9.1  | -      |
| ENSG00000250978 | -2.796355 | -2.316672 | 1 | 1 RP11-357D18.1 | -      |
| ENSG00000250990 | -2.796355 | -2.316672 | 1 | 1 AC073635.5    | -      |
| ENSG00000251055 | -2.796355 | -2.316672 | 1 | 1 RP11-257A22.1 | -      |
| ENSG00000251164 | -2.796355 | -2.316672 | 1 | 1 HULC          | -      |
| ENSG00000251168 | -2.796355 | -2.316672 | 1 | 1 CTD-2072I24.1 | -      |
| ENSG00000251203 | -2.796355 | -2.316672 | 1 | 1 RP11-14I17.1  | K09512 |
| ENSG00000251205 | -2.796355 | -2.316672 | 1 | 1 CTD-2050E21.2 | -      |
| ENSG00000251258 | -2.796355 | -2.316672 | 1 | 1 RFPL4B        | -      |
| ENSG00000251357 | -2.796355 | -2.316672 | 1 | 1 AP000350.10   | K08148 |
| ENSG00000251361 | -2.796355 | -2.316672 | 1 | 1 CTD-2091N23.1 | -      |
| ENSG00000251435 | -2.796355 | -2.316672 | 1 | 1 RP11-365H8.2  | K00731 |
| ENSG00000251441 | -2.796355 | -2.316672 | 1 | 1 RTEL1P1       | K11136 |

|                 |           |           |   |                  |        |
|-----------------|-----------|-----------|---|------------------|--------|
| ENSG00000251451 | -2.796355 | -2.316672 | 1 | 1 GS1-124K5.6    | K03121 |
| ENSG00000251467 | -2.796355 | -2.316672 | 1 | 1 CTC-250P20.2   | K17617 |
| ENSG00000251533 | -2.796355 | -2.316672 | 1 | 1 LINC00605      | -      |
| ENSG00000251544 | -2.796355 | -2.316672 | 1 | 1 MTND5P12       | K03883 |
| ENSG00000251620 | -2.796355 | -2.316672 | 1 | 1 STPG2-AS1      | -      |
| ENSG00000251634 | -2.796355 | -2.316672 | 1 | 1 RP11-1280N14.3 | K12807 |
| ENSG00000251648 | -2.796355 | -2.316672 | 1 | 1 CTD-2353N24.1  | -      |
| ENSG00000251679 | -2.796355 | -2.316672 | 1 | 1 RP11-669M16.2  | -      |
| ENSG00000251827 | -2.796355 | -2.316672 | 1 | 1 RN7SKP215      | -      |
| ENSG00000251985 | -2.796355 | -2.316672 | 1 | 1 RNU6-1161P     | -      |
| ENSG00000251991 | -2.796355 | -2.316672 | 1 | 1 RNU7-49P       | -      |
| ENSG00000252157 | -2.796355 | -2.316672 | 1 | 1 RNU6-479P      | -      |
| ENSG00000252174 | -2.796355 | -2.316672 | 1 | 1 RNU7-18P       | -      |
| ENSG00000252213 | -2.796355 | -2.316672 | 1 | 1 SNORA74        | -      |
| ENSG00000252241 | -2.796355 | -2.316672 | 1 | 1 U3             | -      |
| ENSG00000252361 | -2.796355 | -2.316672 | 1 | 1 RNU6-118P      | -      |
| ENSG00000252408 | -2.796355 | -2.316672 | 1 | 1 SNORD38        | -      |
| ENSG00000252414 | -2.796355 | -2.316672 | 1 | 1 RNU6-100P      | -      |
| ENSG00000252494 | -2.796355 | -2.316672 | 1 | 1 RNU6-126P      | -      |
| ENSG00000252515 | -2.796355 | -2.316672 | 1 | 1 RNU6-1171P     | -      |
| ENSG00000252585 | -2.796355 | -2.316672 | 1 | 1 Y_RNA          | -      |
| ENSG00000252599 | -2.796355 | -2.316672 | 1 | 1 RNU6-566P      | -      |
| ENSG00000252602 | -2.796355 | -2.316672 | 1 | 1 U8             | -      |
| ENSG00000252614 | -2.796355 | -2.316672 | 1 | 1 RNU6-807P      | -      |
| ENSG00000252618 | -2.796355 | -2.316672 | 1 | 1 RNA5SP441      | -      |
| ENSG00000252620 | -2.796355 | -2.316672 | 1 | 1 RNU6ATAC24P    | -      |
| ENSG00000252782 | -2.796355 | -2.316672 | 1 | 1 RNU6-341P      | -      |
| ENSG00000252808 | -2.796355 | -2.316672 | 1 | 1 SCARNA4        | -      |
| ENSG00000252821 | -2.796355 | -2.316672 | 1 | 1 RNU6-388P      | -      |
| ENSG00000252834 | -2.796355 | -2.316672 | 1 | 1 snoR442        | -      |
| ENSG00000252859 | -2.796355 | -2.316672 | 1 | 1 RNU6-375P      | -      |
| ENSG00000252865 | -2.796355 | -2.316672 | 1 | 1 RNU6-594P      | -      |
| ENSG00000252970 | -2.796355 | -2.316672 | 1 | 1 RNA5SP159      | -      |
| ENSG00000252972 | -2.796355 | -2.316672 | 1 | 1 RNA5SP398      | -      |
| ENSG00000252992 | -2.796355 | -2.316672 | 1 | 1 SCARNA11       | -      |
| ENSG00000253112 | -2.796355 | -2.316672 | 1 | 1 CTD-2373N4.5   | -      |
| ENSG00000253175 | -2.796355 | -2.316672 | 1 | 1 RP11-267M23.6  | K02910 |
| ENSG00000253176 | -2.796355 | -2.316672 | 1 | 1 RP11-1149M3.2  | K14535 |
| ENSG00000253197 | -2.796355 | -2.316672 | 1 | 1 CTD-3239E11.2  | -      |
| ENSG00000253229 | -2.796355 | -2.316672 | 1 | 1 HIGD1AP6       | -      |
| ENSG00000253284 | -2.796355 | -2.316672 | 1 | 1 RP11-282K24.3  | -      |
| ENSG00000253302 | -2.796355 | -2.316672 | 1 | 1 STAU2-AS1      | -      |
| ENSG00000253321 | -2.796355 | -2.316672 | 1 | 1 RP11-61G23.2   | -      |
| ENSG00000253334 | -2.796355 | -2.316672 | 1 | 1 RP13-923O23.6  | -      |
| ENSG00000253384 | -2.796355 | -2.316672 | 1 | 1 CTD-2547L16.3  | K04135 |
| ENSG00000253390 | -2.796355 | -2.316672 | 1 | 1 CTC-756D1.2    | -      |
| ENSG00000253433 | -2.796355 | -2.316672 | 1 | 1 AC083843.3     | -      |
| ENSG00000253457 | -2.796355 | -2.316672 | 1 | 1 SMIM18         | -      |
| ENSG00000253485 | -2.796355 | -2.316672 | 1 | 1 PCDHGA5        | K16495 |
| ENSG00000253499 | -2.796355 | -2.316672 | 1 | 1 RP11-393K19.1  | K18164 |
| ENSG00000253515 | -2.796355 | -2.316672 | 1 | 1 RP11-417F21.2  | -      |
| ENSG00000253537 | -2.796355 | -2.316672 | 1 | 1 PCDHGA7        | K16495 |
| ENSG00000253567 | -2.796355 | -2.316672 | 1 | 1 RP11-181B11.2  | -      |
| ENSG00000253620 | -2.796355 | -2.316672 | 1 | 1 AC144568.4     | -      |
| ENSG00000253628 | -2.796355 | -2.316672 | 1 | 1 RP11-536N17.1  | -      |
| ENSG00000253736 | -2.796355 | -2.316672 | 1 | 1 RP11-779O18.3  | -      |
| ENSG00000253764 | -2.796355 | -2.316672 | 1 | 1 RP11-439C15.4  | -      |
| ENSG00000253808 | -2.796355 | -2.316672 | 1 | 1 IGHVII-46-1    | -      |



|                 |           |           |   |                  |        |
|-----------------|-----------|-----------|---|------------------|--------|
| ENSG00000253832 | -2.796355 | -2.316672 | 1 | 1 CTD-2168K21.1  | --     |
| ENSG00000253865 | -2.796355 | -2.316672 | 1 | 1 RP11-394O4.3   | --     |
| ENSG00000253899 | -2.796355 | -2.316672 | 1 | 1 RP11-613H2.2   | --     |
| ENSG00000253917 | -2.796355 | -2.316672 | 1 | 1 AC226119.5     | --     |
| ENSG00000253965 | -2.796355 | -2.316672 | 1 | 1 CTC-329D1.3    | --     |
| ENSG00000254028 | -2.796355 | -2.316672 | 1 | 1 AC083843.2     | --     |
| ENSG00000254034 | -2.796355 | -2.316672 | 1 | 1 RP11-662B19.2  | --     |
| ENSG00000254084 | -2.796355 | -2.316672 | 1 | 1 KB-1930G5.4    | --     |
| ENSG00000254088 | -2.796355 | -2.316672 | 1 | 1 SLC2A3P4       | K08142 |
| ENSG00000254197 | -2.796355 | -2.316672 | 1 | 1 RP11-10J21.5   | --     |
| ENSG00000254254 | -2.796355 | -2.316672 | 1 | 1 RP11-17A4.2    | --     |
| ENSG00000254273 | -2.796355 | -2.316672 | 1 | 1 RP11-181D18.4  | --     |
| ENSG00000254275 | -2.796355 | -2.316672 | 1 | 1 RP11-89M16.1   | --     |
| ENSG00000254300 | -2.796355 | -2.316672 | 1 | 1 LINC01111      | --     |
| ENSG00000254328 | -2.796355 | -2.316672 | 1 | 1 CTC-308K20.4   | K13504 |
| ENSG00000254340 | -2.796355 | -2.316672 | 1 | 1 RP11-10A14.3   | --     |
| ENSG00000254370 | -2.796355 | -2.316672 | 1 | 1 RP11-181B11.1  | --     |
| ENSG00000254414 | -2.796355 | -2.316672 | 1 | 1 RP11-182J1.1   | --     |
| ENSG00000254432 | -2.796355 | -2.316672 | 1 | 1 RP11-33I11.2   | --     |
| ENSG00000254460 | -2.796355 | -2.316672 | 1 | 1 RP11-939C17.4  | --     |
| ENSG00000254463 | -2.796355 | -2.316672 | 1 | 1 RP11-484D2.3   | K03767 |
| ENSG00000254478 | -2.796355 | -2.316672 | 1 | 1 RP11-158I9.1   | K02272 |
| ENSG00000254479 | -2.796355 | -2.316672 | 1 | 1 SLC25A1P1      | K15100 |
| ENSG00000254512 | -2.796355 | -2.316672 | 1 | 1 RP11-472I20.2  | K17080 |
| ENSG00000254536 | -2.796355 | -2.316672 | 1 | 1 RP11-108K14.8  | K00308 |
| ENSG00000254538 | -2.796355 | -2.316672 | 1 | 1 RP11-463D19.1  | --     |
| ENSG00000254544 | -2.796355 | -2.316672 | 1 | 1 PCNAP4         | K04802 |
| ENSG00000254548 | -2.796355 | -2.316672 | 1 | 1 RP11-429J17.5  | --     |
| ENSG00000254584 | -2.796355 | -2.316672 | 1 | 1 RP1-17K7.2     | --     |
| ENSG00000254604 | -2.796355 | -2.316672 | 1 | 1 AP000487.6     | --     |
| ENSG00000254664 | -2.796355 | -2.316672 | 1 | 1 CTD-2560E9.3   | --     |
| ENSG00000254686 | -2.796355 | -2.316672 | 1 | 1 RP1-276E15.1   | --     |
| ENSG00000254690 | -2.796355 | -2.316672 | 1 | 1 GS1-393G12.12  | --     |
| ENSG00000254691 | -2.796355 | -2.316672 | 1 | 1 RP11-91P24.5   | --     |
| ENSG00000254701 | -2.796355 | -2.316672 | 1 | 1 RP11-1415C14.4 | K01195 |
| ENSG00000254730 | -2.796355 | -2.316672 | 1 | 1 RP11-801G16.2  | --     |
| ENSG00000254777 | -2.796355 | -2.316672 | 1 | 1 AC022182.1     | --     |
| ENSG00000254826 | -2.796355 | -2.316672 | 1 | 1 CTD-2530H12.2  | --     |
| ENSG00000254833 | -2.796355 | -2.316672 | 1 | 1 RP11-50B3.2    | --     |
| ENSG00000254847 | -2.796355 | -2.316672 | 1 | 1 RP11-51B23.3   | --     |
| ENSG00000254898 | -2.796355 | -2.316672 | 1 | 1 RP11-513D5.2   | --     |
| ENSG00000254941 | -2.796355 | -2.316672 | 1 | 1 RP11-677M14.5  | --     |
| ENSG00000254964 | -2.796355 | -2.316672 | 1 | 1 RP11-831H9.3   | --     |
| ENSG00000254981 | -2.796355 | -2.316672 | 1 | 1 RP11-350N15.3  | --     |
| ENSG00000254984 | -2.796355 | -2.316672 | 1 | 1 FTLP6          | K17985 |
| ENSG00000255015 | -2.796355 | -2.316672 | 1 | 1 RP11-716H6.1   | --     |
| ENSG00000255038 | -2.796355 | -2.316672 | 1 | 1 RP11-1167A19.2 | --     |
| ENSG00000255094 | -2.796355 | -2.316672 | 1 | 1 RP11-406D1.2   | --     |
| ENSG00000255141 | -2.796355 | -2.316672 | 1 | 1 HNRNPA1P76     | K12741 |
| ENSG00000255160 | -2.796355 | -2.316672 | 1 | 1 RP11-428C19.5  | --     |
| ENSG00000255197 | -2.796355 | -2.316672 | 1 | 1 RP11-750H9.5   | --     |
| ENSG00000255201 | -2.796355 | -2.316672 | 1 | 1 RP11-350N15.4  | --     |
| ENSG00000255203 | -2.796355 | -2.316672 | 1 | 1 OR7E2P         | K04257 |
| ENSG00000255240 | -2.796355 | -2.316672 | 1 | 1 RP11-142C4.6   | --     |
| ENSG00000255308 | -2.796355 | -2.316672 | 1 | 1 RP11-428C19.4  | --     |
| ENSG00000255319 | -2.796355 | -2.316672 | 1 | 1 ENPP7P8        | --     |
| ENSG00000255325 | -2.796355 | -2.316672 | 1 | 1 RP11-96B2.1    | --     |
| ENSG00000255328 | -2.796355 | -2.316672 | 1 | 1 RP11-326C3.12  | --     |

|                 |           |           |   |                  |        |
|-----------------|-----------|-----------|---|------------------|--------|
| ENSG00000255375 | -2.796355 | -2.316672 | 1 | 1 RP1-65P5.5     | -      |
| ENSG00000255397 | -2.796355 | -2.316672 | 1 | 1 AC022182.2     | K11291 |
| ENSG00000255400 | -2.796355 | -2.316672 | 1 | 1 RP13-631K18.5  | -      |
| ENSG00000255409 | -2.796355 | -2.316672 | 1 | 1 RSF1-IT1       | -      |
| ENSG00000255421 | -2.796355 | -2.316672 | 1 | 1 CTD-2011F17.2  | -      |
| ENSG00000255427 | -2.796355 | -2.316672 | 1 | 1 RP11-350D17.2  | -      |
| ENSG00000255474 | -2.796355 | -2.316672 | 1 | 1 RP11-234B24.2  | -      |
| ENSG00000255557 | -2.796355 | -2.316672 | 1 | 1 RP11-770G2.2   | -      |
| ENSG00000255565 | -2.796355 | -2.316672 | 1 | 1 RP11-6B19.1    | -      |
| ENSG00000255746 | -2.796355 | -2.316672 | 1 | 1 RP11-283I3.4   | -      |
| ENSG00000255808 | -2.796355 | -2.316672 | 1 | 1 RP11-31L22.3   | -      |
| ENSG00000255829 | -2.796355 | -2.316672 | 1 | 1 RP11-20D14.3   | -      |
| ENSG00000255839 | -2.796355 | -2.316672 | 1 | 1 RP11-338K17.8  | -      |
| ENSG00000255847 | -2.796355 | -2.316672 | 1 | 1 RP11-167N4.2   | -      |
| ENSG00000255871 | -2.796355 | -2.316672 | 1 | 1 RP11-69C13.1   | -      |
| ENSG00000255883 | -2.796355 | -2.316672 | 1 | 1 AC099522.2     | -      |
| ENSG00000255910 | -2.796355 | -2.316672 | 1 | 1 RP11-405A12.2  | -      |
| ENSG00000255968 | -2.796355 | -2.316672 | 1 | 1 RP11-513G19.1  | -      |
| ENSG00000256159 | -2.796355 | -2.316672 | 1 | 1 RP11-820K3.4   | K02907 |
| ENSG00000256234 | -2.796355 | -2.316672 | 1 | 1 RP11-283G6.4   | -      |
| ENSG00000256238 | -2.796355 | -2.316672 | 1 | 1 RP11-473N11.2  | -      |
| ENSG00000256263 | -2.796355 | -2.316672 | 1 | 1 DDX11L8        | K11273 |
| ENSG00000256278 | -2.796355 | -2.316672 | 1 | 1 RP11-182J1.5   | -      |
| ENSG00000256288 | -2.796355 | -2.316672 | 1 | 1 RP11-277P12.10 | -      |
| ENSG00000256325 | -2.796355 | -2.316672 | 1 | 1 RP11-611O2.1   | -      |
| ENSG00000256351 | -2.796355 | -2.316672 | 1 | 1 RP1-7G5.5      | -      |
| ENSG00000256361 | -2.796355 | -2.316672 | 1 | 1 RP11-613F22.6  | -      |
| ENSG00000256381 | -2.796355 | -2.316672 | 1 | 1 RP11-500M8.4   | -      |
| ENSG00000256407 | -2.796355 | -2.316672 | 1 | 1 RP11-446E24.4  | -      |
| ENSG00000256448 | -2.796355 | -2.316672 | 1 | 1 RP11-809N8.4   | -      |
| ENSG00000256499 | -2.796355 | -2.316672 | 1 | 1 CTC-465D4.1    | -      |
| ENSG00000256564 | -2.796355 | -2.316672 | 1 | 1 RP11-424M22.3  | -      |
| ENSG00000256588 | -2.796355 | -2.316672 | 1 | 1 RP11-613F22.8  | -      |
| ENSG00000256612 | -2.796355 | -2.316672 | 1 | 1 CYP2B7P        | K17709 |
| ENSG00000256650 | -2.796355 | -2.316672 | 1 | 1 RERG-IT1       | -      |
| ENSG00000256671 | -2.796355 | -2.316672 | 1 | 1 LIMS3L         | -      |
| ENSG00000256739 | -2.796355 | -2.316672 | 1 | 1 RP11-45F15.1   | -      |
| ENSG00000256746 | -2.796355 | -2.316672 | 1 | 1 RP11-17G12.3   | -      |
| ENSG00000256771 | -2.796355 | -2.316672 | 1 | 1 ZNF253         | K09228 |
| ENSG00000256898 | -2.796355 | -2.316672 | 1 | 1 RP11-707G14.8  | K05756 |
| ENSG00000256916 | -2.796355 | -2.316672 | 1 | 1 RP11-817J15.2  | -      |
| ENSG00000256944 | -2.796355 | -2.316672 | 1 | 1 RP11-881M11.1  | -      |
| ENSG00000256966 | -2.796355 | -2.316672 | 1 | 1 RP11-613M10.8  | K10296 |
| ENSG00000257069 | -2.796355 | -2.316672 | 1 | 1 RP11-783K16.10 | -      |
| ENSG00000257207 | -2.796355 | -2.316672 | 1 | 1 LIMS3          | -      |
| ENSG00000257246 | -2.796355 | -2.316672 | 1 | 1 RP11-416A17.6  | K17080 |
| ENSG00000257256 | -2.796355 | -2.316672 | 1 | 1 RP3-405J10.4   | -      |
| ENSG00000257283 | -2.796355 | -2.316672 | 1 | 1 RP11-1060G2.1  | -      |
| ENSG00000257336 | -2.796355 | -2.316672 | 1 | 1 PRELID2P1      | -      |
| ENSG00000257403 | -2.796355 | -2.316672 | 1 | 1 CTD-2547E10.3  | -      |
| ENSG00000257438 | -2.796355 | -2.316672 | 1 | 1 RP11-114F10.3  | -      |
| ENSG00000257488 | -2.796355 | -2.316672 | 1 | 1 RP5-1057I20.2  | -      |
| ENSG00000257507 | -2.796355 | -2.316672 | 1 | 1 RP11-956E11.1  | -      |
| ENSG00000257512 | -2.796355 | -2.316672 | 1 | 1 RP11-486A14.1  | K03357 |
| ENSG00000257594 | -2.796355 | -2.316672 | 1 | 1 GALNT4         | K00710 |
| ENSG00000257663 | -2.796355 | -2.316672 | 1 | 1 RP11-1100L3.7  | -      |
| ENSG00000257674 | -2.796355 | -2.316672 | 1 | 1 RP11-76E16.2   | K17392 |
| ENSG00000257726 | -2.796355 | -2.316672 | 1 | 1 RP11-116D17.1  | -      |

|                 |           |           |   |                  |        |
|-----------------|-----------|-----------|---|------------------|--------|
| ENSG00000257859 | -2.796355 | -2.316672 | 1 | 1 CASC18         | -      |
| ENSG00000257886 | -2.796355 | -2.316672 | 1 | 1 RP11-61E11.1   | -      |
| ENSG00000257890 | -2.796355 | -2.316672 | 1 | 1 RP11-114F10.2  | -      |
| ENSG00000257910 | -2.796355 | -2.316672 | 1 | 1 RP11-461F16.3  | -      |
| ENSG00000257918 | -2.796355 | -2.316672 | 1 | 1 RP11-482D24.3  | -      |
| ENSG00000257924 | -2.796355 | -2.316672 | 1 | 1 RP11-493L12.5  | -      |
| ENSG00000257940 | -2.796355 | -2.316672 | 1 | 1 RP11-248E9.6   | -      |
| ENSG00000257956 | -2.796355 | -2.316672 | 1 | 1 RP11-359M6.3   | K14564 |
| ENSG00000257966 | -2.796355 | -2.316672 | 1 | 1 OLA1P3         | K06942 |
| ENSG00000258034 | -2.796355 | -2.316672 | 1 | 1 RP11-493P1.2   | -      |
| ENSG00000258088 | -2.796355 | -2.316672 | 1 | 1 RP11-114H23.2  | -      |
| ENSG00000258137 | -2.796355 | -2.316672 | 1 | 1 RP11-753H16.3  | -      |
| ENSG00000258171 | -2.796355 | -2.316672 | 1 | 1 RP11-511B23.3  | -      |
| ENSG00000258204 | -2.796355 | -2.316672 | 1 | 1 RP11-90E9.1    | K02896 |
| ENSG00000258260 | -2.796355 | -2.316672 | 1 | 1 RP11-977G19.14 | -      |
| ENSG00000258284 | -2.796355 | -2.316672 | 1 | 1 POLR2KP1       | K03009 |
| ENSG00000258317 | -2.796355 | -2.316672 | 1 | 1 RP11-603J24.5  | -      |
| ENSG00000258352 | -2.796355 | -2.316672 | 1 | 1 RP11-23J18.1   | K06566 |
| ENSG00000258355 | -2.796355 | -2.316672 | 1 | 1 RP11-651L5.2   | -      |
| ENSG00000258404 | -2.796355 | -2.316672 | 1 | 1 RP11-1029J19.5 | -      |
| ENSG00000258439 | -2.796355 | -2.316672 | 1 | 1 RP11-173A8.2   | -      |
| ENSG00000258452 | -2.796355 | -2.316672 | 1 | 1 RP11-757H14.2  | K11300 |
| ENSG00000258462 | -2.796355 | -2.316672 | 1 | 1 RP11-831F12.4  | -      |
| ENSG00000258488 | -2.796355 | -2.316672 | 1 | 1 RP11-467L19.8  | K10595 |
| ENSG00000258591 | -2.796355 | -2.316672 | 1 | 1 RP11-545M17.3  | K03767 |
| ENSG00000258599 | -2.796355 | -2.316672 | 1 | 1 RP11-84C10.1   | -      |
| ENSG00000258601 | -2.796355 | -2.316672 | 1 | 1 RP11-81F13.2   | -      |
| ENSG00000258675 | -2.796355 | -2.316672 | 1 | 1 RP11-299L17.3  | -      |
| ENSG00000258745 | -2.796355 | -2.316672 | 1 | 1 RP11-218E20.5  | -      |
| ENSG00000258777 | -2.796355 | -2.316672 | 1 | 1 HIF1A-AS1      | -      |
| ENSG00000258802 | -2.796355 | -2.316672 | 1 | 1 RP11-589M4.2   | -      |
| ENSG00000258809 | -2.796355 | -2.316672 | 1 | 1 CTD-2555O16.1  | -      |
| ENSG00000258851 | -2.796355 | -2.316672 | 1 | 1 RP11-894P9.2   | -      |
| ENSG00000258896 | -2.796355 | -2.316672 | 1 | 1 SCOCPI         | -      |
| ENSG00000258982 | -2.796355 | -2.316672 | 1 | 1 RP11-638I2.4   | -      |
| ENSG00000259005 | -2.796355 | -2.316672 | 1 | 1 RP3-449M8.6    | -      |
| ENSG00000259040 | -2.796355 | -2.316672 | 1 | 1 BLOC1S5-TXNDC5 | K13984 |
| ENSG00000259048 | -2.796355 | -2.316672 | 1 | 1 CTD-2058B24.2  | -      |
| ENSG00000259051 | -2.796355 | -2.316672 | 1 | 1 HNRNPUP1       | K12888 |
| ENSG00000259070 | -2.796355 | -2.316672 | 1 | 1 LINC00639      | -      |
| ENSG00000259096 | -2.796355 | -2.316672 | 1 | 1 FAM35CP        | -      |
| ENSG00000259113 | -2.796355 | -2.316672 | 1 | 1 RP11-406H23.2  | -      |
| ENSG00000259222 | -2.796355 | -2.316672 | 1 | 1 RP11-809H16.5  | -      |
| ENSG00000259224 | -2.796355 | -2.316672 | 1 | 1 SLC35G6        | -      |
| ENSG00000259244 | -2.796355 | -2.316672 | 1 | 1 RP11-182J1.12  | -      |
| ENSG00000259274 | -2.796355 | -2.316672 | 1 | 1 CTD-2501E16.2  | -      |
| ENSG00000259286 | -2.796355 | -2.316672 | 1 | 1 RP11-696L21.2  | -      |
| ENSG00000259399 | -2.796355 | -2.316672 | 1 | 1 TGIF2-C20orf24 | K19553 |
| ENSG00000259416 | -2.796355 | -2.316672 | 1 | 1 RP11-158M2.5   | -      |
| ENSG00000259442 | -2.796355 | -2.316672 | 1 | 1 RP11-752G15.8  | -      |
| ENSG00000259462 | -2.796355 | -2.316672 | 1 | 1 RP11-752G15.3  | -      |
| ENSG00000259501 | -2.796355 | -2.316672 | 1 | 1 RP11-467N20.1  | -      |
| ENSG00000259604 | -2.796355 | -2.316672 | 1 | 1 RP11-66B24.1   | -      |
| ENSG00000259617 | -2.796355 | -2.316672 | 1 | 1 RP11-540O11.6  | -      |
| ENSG00000259649 | -2.796355 | -2.316672 | 1 | 1 RP11-351M8.1   | -      |
| ENSG00000259664 | -2.796355 | -2.316672 | 1 | 1 CTD-2147F2.2   | -      |
| ENSG00000259757 | -2.796355 | -2.316672 | 1 | 1 RP11-129I19.2  | -      |
| ENSG00000259790 | -2.796355 | -2.316672 | 1 | 1 ANP32BP1       | K18647 |

|                 |           |           |   |                  |        |
|-----------------|-----------|-----------|---|------------------|--------|
| ENSG00000259871 | -2.796355 | -2.316672 | 1 | 1 CTA-363E6.1    | --     |
| ENSG00000259883 | -2.796355 | -2.316672 | 1 | 1 CTD-2382E5.4   | --     |
| ENSG00000259922 | -2.796355 | -2.316672 | 1 | 1 RP11-322D14.1  | --     |
| ENSG00000259932 | -2.796355 | -2.316672 | 1 | 1 CTD-2651B20.7  | --     |
| ENSG00000259935 | -2.796355 | -2.316672 | 1 | 1 RP11-519C12.1  | --     |
| ENSG00000259942 | -2.796355 | -2.316672 | 1 | 1 RP11-292F22.7  | --     |
| ENSG00000260011 | -2.796355 | -2.316672 | 1 | 1 RP13-20L14.1   | --     |
| ENSG00000260012 | -2.796355 | -2.316672 | 1 | 1 RP11-329J18.4  | K02737 |
| ENSG00000260017 | -2.796355 | -2.316672 | 1 | 1 RP11-1035H13.2 | --     |
| ENSG00000260034 | -2.796355 | -2.316672 | 1 | 1 RP11-266L9.2   | --     |
| ENSG00000260036 | -2.796355 | -2.316672 | 1 | 1 RP11-178D12.2  | K16339 |
| ENSG00000260091 | -2.796355 | -2.316672 | 1 | 1 RP11-33B1.4    | --     |
| ENSG00000260105 | -2.796355 | -2.316672 | 1 | 1 AOC4P          | K00276 |
| ENSG00000260115 | -2.796355 | -2.316672 | 1 | 1 CTC-420A11.2   | --     |
| ENSG00000260133 | -2.796355 | -2.316672 | 1 | 1 CA5AP1         | K01672 |
| ENSG00000260156 | -2.796355 | -2.316672 | 1 | 1 RP11-394B2.6   | --     |
| ENSG00000260253 | -2.796355 | -2.316672 | 1 | 1 RP4-676L2.1    | --     |
| ENSG00000260286 | -2.796355 | -2.316672 | 1 | 1 C6orf229       | --     |
| ENSG00000260293 | -2.796355 | -2.316672 | 1 | 1 RP11-715J22.6  | --     |
| ENSG00000260318 | -2.796355 | -2.316672 | 1 | 1 COX6CP1        | K02268 |
| ENSG00000260417 | -2.796355 | -2.316672 | 1 | 1 CTD-2542L18.1  | --     |
| ENSG00000260441 | -2.796355 | -2.316672 | 1 | 1 RP11-96D1.7    | --     |
| ENSG00000260496 | -2.796355 | -2.316672 | 1 | 1 RP11-161M6.3   | --     |
| ENSG00000260515 | -2.796355 | -2.316672 | 1 | 1 CTD-2199O4.3   | --     |
| ENSG00000260545 | -2.796355 | -2.316672 | 1 | 1 CTB-134F13.1   | --     |
| ENSG00000260581 | -2.796355 | -2.316672 | 1 | 1 CTB-113P19.4   | --     |
| ENSG00000260608 | -2.796355 | -2.316672 | 1 | 1 RP11-382A20.7  | --     |
| ENSG00000260613 | -2.796355 | -2.316672 | 1 | 1 RP3-522J7.6    | --     |
| ENSG00000260644 | -2.796355 | -2.316672 | 1 | 1 HERC2P5        | K10595 |
| ENSG00000260647 | -2.796355 | -2.316672 | 1 | 1 RP1-178F10.1   | --     |
| ENSG00000260651 | -2.796355 | -2.316672 | 1 | 1 AF213884.2     | --     |
| ENSG00000260660 | -2.796355 | -2.316672 | 1 | 1 RP11-69H7.2    | --     |
| ENSG00000260698 | -2.796355 | -2.316672 | 1 | 1 RP11-439E19.9  | --     |
| ENSG00000260809 | -2.796355 | -2.316672 | 1 | 1 CTD-2144E22.10 | K18468 |
| ENSG00000260818 | -2.796355 | -2.316672 | 1 | 1 UNGP1          | K03648 |
| ENSG00000260851 | -2.796355 | -2.316672 | 1 | 1 RP11-403P17.5  | K00857 |
| ENSG00000260860 | -2.796355 | -2.316672 | 1 | 1 RP11-615I2.3   | --     |
| ENSG00000260880 | -2.796355 | -2.316672 | 1 | 1 HCCAT5         | --     |
| ENSG00000260914 | -2.796355 | -2.316672 | 1 | 1 RP11-343C2.11  | K12196 |
| ENSG00000260997 | -2.796355 | -2.316672 | 1 | 1 RP4-647J21.1   | --     |
| ENSG00000261026 | -2.796355 | -2.316672 | 1 | 1 CTD-3247F14.2  | --     |
| ENSG00000261037 | -2.796355 | -2.316672 | 1 | 1 CTC-471C19.1   | --     |
| ENSG00000261056 | -2.796355 | -2.316672 | 1 | 1 RP11-454F8.2   | K09228 |
| ENSG00000261067 | -2.796355 | -2.316672 | 1 | 1 RP11-264B17.3  | --     |
| ENSG00000261202 | -2.796355 | -2.316672 | 1 | 1 RP3-496C20.1   | --     |
| ENSG00000261243 | -2.796355 | -2.316672 | 1 | 1 RP11-517C16.4  | --     |
| ENSG00000261269 | -2.796355 | -2.316672 | 1 | 1 RP11-389C8.2   | --     |
| ENSG00000261291 | -2.796355 | -2.316672 | 1 | 1 RP11-295M3.2   | --     |
| ENSG00000261359 | -2.796355 | -2.316672 | 1 | 1 C16orf98       | K12799 |
| ENSG00000261392 | -2.796355 | -2.316672 | 1 | 1 RP11-473I1.6   | --     |
| ENSG00000261399 | -2.796355 | -2.316672 | 1 | 1 LA16c-329F2.1  | --     |
| ENSG00000261431 | -2.796355 | -2.316672 | 1 | 1 RP4-616B8.4    | --     |
| ENSG00000261435 | -2.796355 | -2.316672 | 1 | 1 MIR1587        | --     |
| ENSG00000261519 | -2.796355 | -2.316672 | 1 | 1 Y_RNA          | --     |
| ENSG00000261568 | -2.796355 | -2.316672 | 1 | 1 RP11-524C21.2  | --     |
| ENSG00000261592 | -2.796355 | -2.316672 | 1 | 1 RP11-178L8.3   | --     |
| ENSG00000261599 | -2.796355 | -2.316672 | 1 | 1 HERC2P8        | K10595 |
| ENSG00000261610 | -2.796355 | -2.316672 | 1 | 1 AP000265.1     | --     |

|                 |           |           |   |                  |        |
|-----------------|-----------|-----------|---|------------------|--------|
| ENSG00000261616 | -2.796355 | -2.316672 | 1 | 1 RP11-6O2.3     | --     |
| ENSG00000261669 | -2.796355 | -2.316672 | 1 | 1 CTD-2515A14.1  | --     |
| ENSG00000261673 | -2.796355 | -2.316672 | 1 | 1 RP11-328J14.1  | --     |
| ENSG00000261729 | -2.796355 | -2.316672 | 1 | 1 GS1-204I12.4   | --     |
| ENSG00000261789 | -2.796355 | -2.316672 | 1 | 1 RP11-709D24.5  | --     |
| ENSG00000261796 | -2.796355 | -2.316672 | 1 | 1 ISY1-RAB43     | K12870 |
| ENSG00000261839 | -2.796355 | -2.316672 | 1 | 1 RP1-265C24.8   | --     |
| ENSG00000261872 | -2.796355 | -2.316672 | 1 | 1 RP5-867C24.5   | --     |
| ENSG00000261916 | -2.796355 | -2.316672 | 1 | 1 RP11-235E17.4  | --     |
| ENSG00000262026 | -2.796355 | -2.316672 | 1 | 1 RP11-2C24.6    | --     |
| ENSG00000262052 | -2.796355 | -2.316672 | 1 | 1 RP11-763E3.1   | --     |
| ENSG00000262115 | -2.796355 | -2.316672 | 1 | 1 RP11-455O6.2   | --     |
| ENSG00000262136 | -2.796355 | -2.316672 | 1 | 1 CTD-2033A16.3  | --     |
| ENSG00000262227 | -2.796355 | -2.316672 | 1 | 1 RP5-1050D4.5   | --     |
| ENSG00000262248 | -2.796355 | -2.316672 | 1 | 1 RP11-235E17.5  | K01724 |
| ENSG00000262380 | -2.796355 | -2.316672 | 1 | 1 CTB-193M12.3   | --     |
| ENSG00000262412 | -2.796355 | -2.316672 | 1 | 1 RP11-85G18.6   | --     |
| ENSG00000262429 | -2.796355 | -2.316672 | 1 | 1 RP5-1050D4.3   | --     |
| ENSG00000262471 | -2.796355 | -2.316672 | 1 | 1 RP11-95P2.4    | K08762 |
| ENSG00000262488 | -2.796355 | -2.316672 | 1 | 1 RP11-876N24.1  | --     |
| ENSG00000262526 | -2.796355 | -2.316672 | 1 | 1 CTD-2545G14.7  | K08341 |
| ENSG00000262623 | -2.796355 | -2.316672 | 1 | 1 RP5-1107A17.2  | K02957 |
| ENSG00000262668 | -2.796355 | -2.316672 | 1 | 1 AJ003147.9     | --     |
| ENSG00000262730 | -2.796355 | -2.316672 | 1 | 1 RP11-1099M24.7 | K04884 |
| ENSG00000262810 | -2.796355 | -2.316672 | 1 | 1 RP11-667K14.5  | --     |
| ENSG00000262999 | -2.796355 | -2.316672 | 1 | 1 CTD-3088G3.6   | --     |
| ENSG00000263045 | -2.796355 | -2.316672 | 1 | 1 RP11-28B23.1   | --     |
| ENSG00000263201 | -2.796355 | -2.316672 | 1 | 1 CTC-479C5.6    | --     |
| ENSG00000263311 | -2.796355 | -2.316672 | 1 | 1 RP11-498D10.8  | --     |
| ENSG00000263393 | -2.796355 | -2.316672 | 1 | 1 RP11-53I6.4    | --     |
| ENSG00000263406 | -2.796355 | -2.316672 | 1 | 1 RN7SL821P      | --     |
| ENSG00000263407 | -2.796355 | -2.316672 | 1 | 1 MIR4660        | --     |
| ENSG00000263477 | -2.796355 | -2.316672 | 1 | 1 RP11-338L22.2  | --     |
| ENSG00000263499 | -2.796355 | -2.316672 | 1 | 1 RP11-118E18.4  | --     |
| ENSG00000263539 | -2.796355 | -2.316672 | 1 | 1 AC024475.1     | --     |
| ENSG00000263657 | -2.796355 | -2.316672 | 1 | 1 RP11-82O19.1   | --     |
| ENSG00000263680 | -2.796355 | -2.316672 | 1 | 1 RP11-57A1.1    | --     |
| ENSG00000263742 | -2.796355 | -2.316672 | 1 | 1 MIR3165        | --     |
| ENSG00000263813 | -2.796355 | -2.316672 | 1 | 1 MIR3679        | --     |
| ENSG00000264012 | -2.796355 | -2.316672 | 1 | 1 RP11-627G18.2  | --     |
| ENSG00000264171 | -2.796355 | -2.316672 | 1 | 1 MIR4305        | --     |
| ENSG00000264190 | -2.796355 | -2.316672 | 1 | 1 MIR5006        | --     |
| ENSG00000264273 | -2.796355 | -2.316672 | 1 | 1 CTD-2145A24.4  | --     |
| ENSG00000264279 | -2.796355 | -2.316672 | 1 | 1 MIR4786        | --     |
| ENSG00000264384 | -2.796355 | -2.316672 | 1 | 1 RN7SL431P      | --     |
| ENSG00000264435 | -2.796355 | -2.316672 | 1 | 1 RP11-338L22.3  | K00940 |
| ENSG00000264496 | -2.796355 | -2.316672 | 1 | 1 AC108218.1     | --     |
| ENSG00000264572 | -2.796355 | -2.316672 | 1 | 1 MIR4296        | --     |
| ENSG00000264584 | -2.796355 | -2.316672 | 1 | 1 RN7SL600P      | --     |
| ENSG00000264666 | -2.796355 | -2.316672 | 1 | 1 RP11-524F11.2  | --     |
| ENSG00000264671 | -2.796355 | -2.316672 | 1 | 1 AP006477.1     | --     |
| ENSG00000264756 | -2.796355 | -2.316672 | 1 | 1 RN7SL805P      | --     |
| ENSG00000264771 | -2.796355 | -2.316672 | 1 | 1 AC022819.1     | --     |
| ENSG00000264792 | -2.796355 | -2.316672 | 1 | 1 MIR4637        | --     |
| ENSG00000264857 | -2.796355 | -2.316672 | 1 | 1 MIR5696        | --     |
| ENSG00000264860 | -2.796355 | -2.316672 | 1 | 1 RP11-143K11.5  | --     |
| ENSG00000264864 | -2.796355 | -2.316672 | 1 | 1 MIR3613        | --     |
| ENSG00000264878 | -2.796355 | -2.316672 | 1 | 1 Z85986.1       | --     |

|                 |           |           |   |                 |        |
|-----------------|-----------|-----------|---|-----------------|--------|
| ENSG00000264961 | -2.796355 | -2.316672 | 1 | 1 MIR4730       | --     |
| ENSG00000264964 | -2.796355 | -2.316672 | 1 | 1 RP11-888D10.3 | --     |
| ENSG00000265008 | -2.796355 | -2.316672 | 1 | 1 RP11-5316.3   | --     |
| ENSG00000265069 | -2.796355 | -2.316672 | 1 | 1 RP11-781P6.1  | --     |
| ENSG00000265083 | -2.796355 | -2.316672 | 1 | 1 MIR3691       | --     |
| ENSG00000265123 | -2.796355 | -2.316672 | 1 | 1 RN7SL200P     | --     |
| ENSG00000265126 | -2.796355 | -2.316672 | 1 | 1 CTB-187M2.2   | --     |
| ENSG00000265128 | -2.796355 | -2.316672 | 1 | 1 RP11-15F12.3  | --     |
| ENSG00000265139 | -2.796355 | -2.316672 | 1 | 1 RP11-227G15.2 | --     |
| ENSG00000265195 | -2.796355 | -2.316672 | 1 | 1 MIR4312       | --     |
| ENSG00000265264 | -2.796355 | -2.316672 | 1 | 1 TIMM10B       | K17779 |
| ENSG00000265282 | -2.796355 | -2.316672 | 1 | 1 RP11-269G24.4 | --     |
| ENSG00000265287 | -2.796355 | -2.316672 | 1 | 1 RP11-192H23.6 | --     |
| ENSG00000265317 | -2.796355 | -2.316672 | 1 | 1 AC103740.1    | --     |
| ENSG00000265345 | -2.796355 | -2.316672 | 1 | 1 MIR5188       | --     |
| ENSG00000265386 | -2.796355 | -2.316672 | 1 | 1 RN7SL219P     | --     |
| ENSG00000265394 | -2.796355 | -2.316672 | 1 | 1 RP11-1148O4.2 | --     |
| ENSG00000265425 | -2.796355 | -2.316672 | 1 | 1 RP11-128D14.1 | --     |
| ENSG00000265463 | -2.796355 | -2.316672 | 1 | 1 AC012391.1    | --     |
| ENSG00000265480 | -2.796355 | -2.316672 | 1 | 1 KRT18P55      | K07604 |
| ENSG00000265485 | -2.796355 | -2.316672 | 1 | 1 RP11-449D8.1  | --     |
| ENSG00000265507 | -2.796355 | -2.316672 | 1 | 1 MIR4435-1     | --     |
| ENSG00000265527 | -2.796355 | -2.316672 | 1 | 1 MIR5690       | --     |
| ENSG00000265611 | -2.796355 | -2.316672 | 1 | 1 MIR5010       | --     |
| ENSG00000265638 | -2.796355 | -2.316672 | 1 | 1 AC005702.3    | --     |
| ENSG00000265647 | -2.796355 | -2.316672 | 1 | 1 AL358815.1    | --     |
| ENSG00000265809 | -2.796355 | -2.316672 | 1 | 1 AC007114.1    | --     |
| ENSG00000265843 | -2.796355 | -2.316672 | 1 | 1 LINC01029     | --     |
| ENSG00000265932 | -2.796355 | -2.316672 | 1 | 1 MIR3146       | --     |
| ENSG00000265987 | -2.796355 | -2.316672 | 1 | 1 RP11-16C1.3   | --     |
| ENSG00000266047 | -2.796355 | -2.316672 | 1 | 1 AL139377.1    | --     |
| ENSG00000266063 | -2.796355 | -2.316672 | 1 | 1 MIR4771-2     | --     |
| ENSG00000266075 | -2.796355 | -2.316672 | 1 | 1 RN7SL574P     | --     |
| ENSG00000266111 | -2.796355 | -2.316672 | 1 | 1 RP11-296K13.4 | --     |
| ENSG00000266296 | -2.796355 | -2.316672 | 1 | 1 ARIH2P1       | K11969 |
| ENSG00000266311 | -2.796355 | -2.316672 | 1 | 1 AC007952.4    | --     |
| ENSG00000266340 | -2.796355 | -2.316672 | 1 | 1 RP11-848P1.4  | --     |
| ENSG00000266385 | -2.796355 | -2.316672 | 1 | 1 RP11-227G15.8 | --     |
| ENSG00000266397 | -2.796355 | -2.316672 | 1 | 1 RP11-737O24.1 | --     |
| ENSG00000266423 | -2.796355 | -2.316672 | 1 | 1 MIR3163       | --     |
| ENSG00000266428 | -2.796355 | -2.316672 | 1 | 1 RN7SL663P     | --     |
| ENSG00000266521 | -2.796355 | -2.316672 | 1 | 1 RP11-650P15.1 | --     |
| ENSG00000266541 | -2.796355 | -2.316672 | 1 | 1 RP11-881L2.1  | --     |
| ENSG00000266594 | -2.796355 | -2.316672 | 1 | 1 MIR4766       | --     |
| ENSG00000266649 | -2.796355 | -2.316672 | 1 | 1 MIR3126       | --     |
| ENSG00000266677 | -2.796355 | -2.316672 | 1 | 1 RP11-258F1.1  | --     |
| ENSG00000266721 | -2.796355 | -2.316672 | 1 | 1 MIR5695       | --     |
| ENSG00000266811 | -2.796355 | -2.316672 | 1 | 1 MIR3118-3     | --     |
| ENSG00000266844 | -2.796355 | -2.316672 | 1 | 1 RP11-862L9.3  | --     |
| ENSG00000266872 | -2.796355 | -2.316672 | 1 | 1 RP11-19P22.8  | --     |
| ENSG00000266918 | -2.796355 | -2.316672 | 1 | 1 RP11-798G7.8  | --     |
| ENSG00000266922 | -2.796355 | -2.316672 | 1 | 1 CTC-499B15.6  | --     |
| ENSG00000266934 | -2.796355 | -2.316672 | 1 | 1 RP11-332H18.3 | --     |
| ENSG00000266936 | -2.796355 | -2.316672 | 1 | 1 CTC-215O4.4   | --     |
| ENSG00000266944 | -2.796355 | -2.316672 | 1 | 1 AC005262.4    | K02918 |
| ENSG00000266987 | -2.796355 | -2.316672 | 1 | 1 RP11-354P11.8 | --     |
| ENSG00000266994 | -2.796355 | -2.316672 | 1 | 1 RP11-127I20.7 | --     |
| ENSG00000267032 | -2.796355 | -2.316672 | 1 | 1 RP11-807E13.2 | --     |

|                 |           |           |   |                  |        |
|-----------------|-----------|-----------|---|------------------|--------|
| ENSG00000267036 | -2.796355 | -2.316672 | 1 | 1 AC005559.3     | K04955 |
| ENSG00000267064 | -2.796355 | -2.316672 | 1 | 1 UXT-AS1        | -      |
| ENSG00000267088 | -2.796355 | -2.316672 | 1 | 1 RP11-115N12.1  | -      |
| ENSG00000267108 | -2.796355 | -2.316672 | 1 | 1 RP11-861E21.1  | -      |
| ENSG00000267110 | -2.796355 | -2.316672 | 1 | 1 CTD-2587H24.4  | K12044 |
| ENSG00000267112 | -2.796355 | -2.316672 | 1 | 1 RP11-839G9.1   | -      |
| ENSG00000267114 | -2.796355 | -2.316672 | 1 | 1 CTB-129P6.11   | K12900 |
| ENSG00000267131 | -2.796355 | -2.316672 | 1 | 1 RP11-332H18.5  | -      |
| ENSG00000267157 | -2.796355 | -2.316672 | 1 | 1 CTB-54O9.9     | K05544 |
| ENSG00000267198 | -2.796355 | -2.316672 | 1 | 1 RP11-798G7.6   | -      |
| ENSG00000267211 | -2.796355 | -2.316672 | 1 | 1 RP5-1067M6.3   | -      |
| ENSG00000267230 | -2.796355 | -2.316672 | 1 | 1 RP11-376M2.2   | -      |
| ENSG00000267257 | -2.796355 | -2.316672 | 1 | 1 RP11-1151B14.4 | -      |
| ENSG00000267275 | -2.796355 | -2.316672 | 1 | 1 CTD-2562J15.6  | -      |
| ENSG00000267282 | -2.796355 | -2.316672 | 1 | 1 CTB-129P6.4    | -      |
| ENSG00000267289 | -2.796355 | -2.316672 | 1 | 1 CTD-2623N2.11  | -      |
| ENSG00000267299 | -2.796355 | -2.316672 | 1 | 1 CTB-66B24.1    | -      |
| ENSG00000267518 | -2.796355 | -2.316672 | 1 | 1 RP11-794C22.2  | K11300 |
| ENSG00000267533 | -2.796355 | -2.316672 | 1 | 1 RP11-815J4.7   | -      |
| ENSG00000267541 | -2.796355 | -2.316672 | 1 | 1 RP11-380M21.2  | K02261 |
| ENSG00000267557 | -2.796355 | -2.316672 | 1 | 1 CTC-379B2.4    | -      |
| ENSG00000267562 | -2.796355 | -2.316672 | 1 | 1 CTC-421K24.1   | K02896 |
| ENSG00000267573 | -2.796355 | -2.316672 | 1 | 1 KRT8P5         | K07605 |
| ENSG00000267614 | -2.796355 | -2.316672 | 1 | 1 AC138472.6     | -      |
| ENSG00000267647 | -2.796355 | -2.316672 | 1 | 1 MAP1LC3P       | -      |
| ENSG00000267657 | -2.796355 | -2.316672 | 1 | 1 CTB-186H2.2    | -      |
| ENSG00000267692 | -2.796355 | -2.316672 | 1 | 1 TAF9P3         | K18532 |
| ENSG00000267701 | -2.796355 | -2.316672 | 1 | 1 RP11-28F1.2    | -      |
| ENSG00000267729 | -2.796355 | -2.316672 | 1 | 1 AC010761.14    | -      |
| ENSG00000267741 | -2.796355 | -2.316672 | 1 | 1 UBE2L4         | K04552 |
| ENSG00000267743 | -2.796355 | -2.316672 | 1 | 1 RP11-718I15.1  | -      |
| ENSG00000267744 | -2.796355 | -2.316672 | 1 | 1 RP11-799D4.1   | K09440 |
| ENSG00000267765 | -2.796355 | -2.316672 | 1 | 1 CTD-3193K9.3   | -      |
| ENSG00000267800 | -2.796355 | -2.316672 | 1 | 1 RP11-49K24.5   | K12160 |
| ENSG00000267885 | -2.796355 | -2.316672 | 1 | 1 FKSG48         | -      |
| ENSG00000267976 | -2.796355 | -2.316672 | 1 | 1 AP000695.1     | K03029 |
| ENSG00000268015 | -2.796355 | -2.316672 | 1 | 1 CTD-2525I3.3   | -      |
| ENSG00000268034 | -2.796355 | -2.316672 | 1 | 1 AC005795.1     | K09290 |
| ENSG00000268058 | -2.796355 | -2.316672 | 1 | 1 CTD-2017D11.3  | -      |
| ENSG00000268076 | -2.796355 | -2.316672 | 1 | 1 AC087239.1     | -      |
| ENSG00000268098 | -2.796355 | -2.316672 | 1 | 1 AP000688.1     | -      |
| ENSG00000268155 | -2.796355 | -2.316672 | 1 | 1 AL161450.1     | -      |
| ENSG00000268162 | -2.796355 | -2.316672 | 1 | 1 HBCBP          | -      |
| ENSG00000268275 | -2.796355 | -2.316672 | 1 | 1 AL035588.1     | -      |
| ENSG00000268307 | -2.796355 | -2.316672 | 1 | 1 CTD-2619J13.13 | -      |
| ENSG00000268328 | -2.796355 | -2.316672 | 1 | 1 AC019206.1     | -      |
| ENSG00000268367 | -2.796355 | -2.316672 | 1 | 1 AC126614.1     | K02927 |
| ENSG00000268396 | -2.796355 | -2.316672 | 1 | 1 AC012485.1     | -      |
| ENSG00000268423 | -2.796355 | -2.316672 | 1 | 1 AC011551.3     | K06115 |
| ENSG00000268457 | -2.796355 | -2.316672 | 1 | 1 AL160175.1     | -      |
| ENSG00000268615 | -2.796355 | -2.316672 | 1 | 1 RP11-65J3.15   | -      |
| ENSG00000268649 | -2.796355 | -2.316672 | 1 | 1 MIR296         | -      |
| ENSG00000268656 | -2.796355 | -2.316672 | 1 | 1 AC110084.1     | -      |
| ENSG00000268686 | -2.796355 | -2.316672 | 1 | 1 AC010524.2     | -      |
| ENSG00000268758 | -2.796355 | -2.316672 | 1 | 1 EMR4P          | K08445 |
| ENSG00000268764 | -2.796355 | -2.316672 | 1 | 1 CTC-450M9.1    | -      |
| ENSG00000268836 | -2.796355 | -2.316672 | 1 | 1 LA16c-OS12.2   | -      |
| ENSG00000268913 | -2.796355 | -2.316672 | 1 | 1 AC026806.2     | -      |

|                 |           |           |   |                  |        |
|-----------------|-----------|-----------|---|------------------|--------|
| ENSG00000268938 | -2.796355 | -2.316672 | 1 | 1 AC005387.3     | -      |
| ENSG00000268996 | -2.796355 | -2.316672 | 1 | 1 AL807752.1     | -      |
| ENSG00000269148 | -2.796355 | -2.316672 | 1 | 1 AC092301.3     | -      |
| ENSG00000269172 | -2.796355 | -2.316672 | 1 | 1 CTC-218B8.3    | -      |
| ENSG00000269227 | -2.796355 | -2.316672 | 1 | 1 RP11-345P4.6   | K02993 |
| ENSG00000269279 | -2.796355 | -2.316672 | 1 | 1 AL136376.1     | K01539 |
| ENSG00000269304 | -2.796355 | -2.316672 | 1 | 1 AC010522.1     | K09568 |
| ENSG00000269363 | -2.796355 | -2.316672 | 1 | 1 MGC4771        | -      |
| ENSG00000269388 | -2.796355 | -2.316672 | 1 | 1 AC018755.16    | K14168 |
| ENSG00000269397 | -2.796355 | -2.316672 | 1 | 1 CTB-92J24.2    | -      |
| ENSG00000269402 | -2.796355 | -2.316672 | 1 | 1 AC116407.2     | K12173 |
| ENSG00000269407 | -2.796355 | -2.316672 | 1 | 1 AL096677.1     | -      |
| ENSG00000269466 | -2.796355 | -2.316672 | 1 | 1 RP11-432M8.17  | K11253 |
| ENSG00000269526 | -2.796355 | -2.316672 | 1 | 1 ERVV-1         | -      |
| ENSG00000269570 | -2.796355 | -2.316672 | 1 | 1 AP001350.1     | -      |
| ENSG00000269653 | -2.796355 | -2.316672 | 1 | 1 CTB-102L5.7    | -      |
| ENSG00000269736 | -2.796355 | -2.316672 | 1 | 1 CTD-2521M24.11 | -      |
| ENSG00000269746 | -2.796355 | -2.316672 | 1 | 1 AC009060.1     | -      |
| ENSG00000269832 | -2.796355 | -2.316672 | 1 | 1 AL627171.2     | -      |
| ENSG00000269913 | -2.796355 | -2.316672 | 1 | 1 CTC-1337H24.1  | -      |
| ENSG00000269925 | -2.796355 | -2.316672 | 1 | 1 RP3-467L1.6    | -      |
| ENSG00000269934 | -2.796355 | -2.316672 | 1 | 1 RP5-1139B12.3  | -      |
| ENSG00000269935 | -2.796355 | -2.316672 | 1 | 1 RP11-482M8.3   | -      |
| ENSG00000269976 | -2.796355 | -2.316672 | 1 | 1 RP11-130L8.2   | -      |
| ENSG00000269996 | -2.796355 | -2.316672 | 1 | 1 RP11-343N15.5  | -      |
| ENSG00000270002 | -2.796355 | -2.316672 | 1 | 1 RP11-93H12.4   | -      |
| ENSG00000270011 | -2.796355 | -2.316672 | 1 | 1 ZNF559-ZNF177  | K09228 |
| ENSG00000270036 | -2.796355 | -2.316672 | 1 | 1 RP11-685G9.4   | -      |
| ENSG00000270095 | -2.796355 | -2.316672 | 1 | 1 RP11-214K3.18  | -      |
| ENSG00000270103 | -2.796355 | -2.316672 | 1 | 1 RNU11          | -      |
| ENSG00000270137 | -2.796355 | -2.316672 | 1 | 1 CTC-137K3.1    | -      |
| ENSG00000270248 | -2.796355 | -2.316672 | 1 | 1 CTC-471J1.10   | -      |
| ENSG00000270255 | -2.796355 | -2.316672 | 1 | 1 RP11-420B22.2  | -      |
| ENSG00000270299 | -2.796355 | -2.316672 | 1 | 1 RP5-850E9.3    | K12260 |
| ENSG00000270324 | -2.796355 | -2.316672 | 1 | 1 RP11-180P8.4   | -      |
| ENSG00000270356 | -2.796355 | -2.316672 | 1 | 1 IGHV1OR15-4    | K06856 |
| ENSG00000270399 | -2.796355 | -2.316672 | 1 | 1 RP11-1407O15.3 | K13241 |
| ENSG00000270490 | -2.796355 | -2.316672 | 1 | 1 RP11-622C24.1  | K17800 |
| ENSG00000270577 | -2.796355 | -2.316672 | 1 | 1 RP5-1147A1.1   | -      |
| ENSG00000270591 | -2.796355 | -2.316672 | 1 | 1 RP11-73M18.11  | K11584 |
| ENSG00000270777 | -2.796355 | -2.316672 | 1 | 1 RP11-103J8.2   | -      |
| ENSG00000270849 | -2.796355 | -2.316672 | 1 | 1 CHCHD2P3       | -      |
| ENSG00000270876 | -2.796355 | -2.316672 | 1 | 1 CTC-523E23.8   | -      |
| ENSG00000270972 | -2.796355 | -2.316672 | 1 | 1 RP11-326C3.15  | -      |
| ENSG00000271002 | -2.796355 | -2.316672 | 1 | 1 RP11-599B13.8  | K02868 |
| ENSG00000271141 | -2.796355 | -2.316672 | 1 | 1 RP11-171I2.4   | -      |
| ENSG00000271214 | -2.796355 | -2.316672 | 1 | 1 RP11-9M16.3    | -      |
| ENSG00000271225 | -2.796355 | -2.316672 | 1 | 1 RP11-460N11.3  | K15464 |
| ENSG00000271227 | -2.796355 | -2.316672 | 1 | 1 RP1-152L7.8    | -      |
| ENSG00000271337 | -2.796355 | -2.316672 | 1 | 1 NDE1P2         | K04257 |
| ENSG00000271414 | -2.796355 | -2.316672 | 1 | 1 RP11-751K21.1  | -      |
| ENSG00000271415 | -2.796355 | -2.316672 | 1 | 1 RP11-305E17.7  | -      |
| ENSG00000271490 | -2.796355 | -2.316672 | 1 | 1 RP11-60E8.4    | -      |
| ENSG00000271532 | -2.796355 | -2.316672 | 1 | 1 RP11-426K3.1   | K19399 |
| ENSG00000271537 | -2.796355 | -2.316672 | 1 | 1 RP11-365F18.6  | K14566 |
| ENSG00000271600 | -2.796355 | -2.316672 | 1 | 1 RP11-864G5.8   | -      |
| ENSG00000271626 | -2.796355 | -2.316672 | 1 | 1 RP11-3K24.2    | K11253 |
| ENSG00000271639 | -2.796355 | -2.316672 | 1 | 1 RP11-289A15.1  | -      |



|                 |           |           |   |                  |        |
|-----------------|-----------|-----------|---|------------------|--------|
| ENSG00000271670 | -2.796355 | -2.316672 | 1 | 1 RP11-95I16.4   | --     |
| ENSG00000271710 | -2.796355 | -2.316672 | 1 | 1 RP11-312P12.3  | --     |
| ENSG00000271757 | -2.796355 | -2.316672 | 1 | 1 RP11-111M22.5  | --     |
| ENSG00000271795 | -2.796355 | -2.316672 | 1 | 1 CTC-251D13.1   | --     |
| ENSG00000271798 | -2.796355 | -2.316672 | 1 | 1 SNORA51        | --     |
| ENSG00000271819 | -2.796355 | -2.316672 | 1 | 1 U6             | --     |
| ENSG00000271889 | -2.796355 | -2.316672 | 1 | 1 RP11-493E12.1  | --     |
| ENSG00000271930 | -2.796355 | -2.316672 | 1 | 1 RP11-44N12.5   | --     |
| ENSG00000271937 | -2.796355 | -2.316672 | 1 | 1 RP11-424N24.2  | --     |
| ENSG00000271977 | -2.796355 | -2.316672 | 1 | 1 AC226119.4     | --     |
| ENSG00000271991 | -2.796355 | -2.316672 | 1 | 1 RP11-79O8.1    | --     |
| ENSG00000272004 | -2.796355 | -2.316672 | 1 | 1 RP11-345P4.10  | --     |
| ENSG00000272055 | -2.796355 | -2.316672 | 1 | 1 RNU6-6P        | --     |
| ENSG00000272123 | -2.796355 | -2.316672 | 1 | 1 CTD-2366F13.2  | --     |
| ENSG00000272170 | -2.796355 | -2.316672 | 1 | 1 RP11-387M24.5  | --     |
| ENSG00000272267 | -2.796355 | -2.316672 | 1 | 1 RP11-375N15.2  | --     |
| ENSG00000272274 | -2.796355 | -2.316672 | 1 | 1 LINC00551      | --     |
| ENSG00000272281 | -2.796355 | -2.316672 | 1 | 1 TPTE2P2        | K18079 |
| ENSG00000272308 | -2.796355 | -2.316672 | 1 | 1 RP11-231G3.1   | --     |
| ENSG00000272312 | -2.796355 | -2.316672 | 1 | 1 RP11-239L20.6  | --     |
| ENSG00000272333 | -2.796355 | -2.316672 | 1 | 1 KMT2B          | K14959 |
| ENSG00000272354 | -2.796355 | -2.316672 | 1 | 1 RP11-307L14.2  | --     |
| ENSG00000272359 | -2.796355 | -2.316672 | 1 | 1 U4             | --     |
| ENSG00000272361 | -2.796355 | -2.316672 | 1 | 1 GS1-166A23.2   | --     |
| ENSG00000272403 | -2.796355 | -2.316672 | 1 | 1 RP1-93H18.7    | --     |
| ENSG00000272439 | -2.796355 | -2.316672 | 1 | 1 U6             | --     |
| ENSG00000272472 | -2.796355 | -2.316672 | 1 | 1 RP11-95G17.2   | --     |
| ENSG00000272506 | -2.796355 | -2.316672 | 1 | 1 RP4-535B20.4   | --     |
| ENSG00000272508 | -2.796355 | -2.316672 | 1 | 1 RP11-96C23.14  | --     |
| ENSG00000272516 | -2.796355 | -2.316672 | 1 | 1 RP11-573G6.9   | --     |
| ENSG00000272533 | -2.796355 | -2.316672 | 1 | 1 SNORA28        | --     |
| ENSG00000272736 | -2.796355 | -2.316672 | 1 | 1 RP11-799N11.1  | --     |
| ENSG00000272745 | -2.796355 | -2.316672 | 1 | 1 RP5-1007H16.1  | --     |
| ENSG00000272772 | -2.796355 | -2.316672 | 1 | 1 CTD-2410N18.5  | K03094 |
| ENSG00000272827 | -2.796355 | -2.316672 | 1 | 1 RP11-445P19.3  | --     |
| ENSG00000272832 | -2.796355 | -2.316672 | 1 | 1 RP11-91K8.5    | --     |
| ENSG00000272856 | -2.796355 | -2.316672 | 1 | 1 RP11-710E1.2   | --     |
| ENSG00000272859 | -2.796355 | -2.316672 | 1 | 1 RP11-352E8.2   | --     |
| ENSG00000272861 | -2.796355 | -2.316672 | 1 | 1 RP11-332H14.1  | --     |
| ENSG00000272895 | -2.796355 | -2.316672 | 1 | 1 RP11-98C1.2    | --     |
| ENSG00000272921 | -2.796355 | -2.316672 | 1 | 1 RP11-500M8.7   | K03953 |
| ENSG00000272922 | -2.796355 | -2.316672 | 1 | 1 RP11-329B9.5   | --     |
| ENSG00000272968 | -2.796355 | -2.316672 | 1 | 1 RBAK-RBAKDN    | K09228 |
| ENSG00000272979 | -2.796355 | -2.316672 | 1 | 1 RP11-647K16.1  | --     |
| ENSG00000273009 | -2.796355 | -2.316672 | 1 | 1 RP11-352G9.1   | --     |
| ENSG00000273019 | -2.796355 | -2.316672 | 1 | 1 RP11-508N22.13 | --     |
| ENSG00000273044 | -2.796355 | -2.316672 | 1 | 1 RP4-569D19.8   | --     |
| ENSG00000273063 | -2.796355 | -2.316672 | 1 | 1 RP11-334G22.1  | --     |
| ENSG00000273091 | -2.796355 | -2.316672 | 1 | 1 AP000255.6     | --     |
| ENSG00000273093 | -2.796355 | -2.316672 | 1 | 1 RP11-532L16.3  | --     |
| ENSG00000273184 | -2.796355 | -2.316672 | 1 | 1 RP11-212P7.3   | --     |
| ENSG00000273210 | -2.796355 | -2.316672 | 1 | 1 AP001437.1     | --     |
| ENSG00000273216 | -2.796355 | -2.316672 | 1 | 1 AC002059.10    | --     |
| ENSG00000273245 | -2.796355 | -2.316672 | 1 | 1 RP11-434P11.2  | --     |
| ENSG00000273293 | -2.796355 | -2.316672 | 1 | 1 RP11-445N20.3  | --     |
| ENSG00000273321 | -2.796355 | -2.316672 | 1 | 1 RP11-621L6.3   | --     |
| ENSG00000273361 | -2.796355 | -2.316672 | 1 | 1 RP11-378A13.2  | --     |
| ENSG00000273396 | -2.796355 | -2.316672 | 1 | 1 RP11-326I19.3  | --     |

|                 |           |           |   |                 |        |
|-----------------|-----------|-----------|---|-----------------|--------|
| ENSG00000273419 | -2.796355 | -2.316672 | 1 | 1 RP4-751H13.7  | -      |
| ENSG00000273454 | -2.796355 | -2.316672 | 1 | 1 RP11-797D24.3 | -      |
| ENSG00000012223 | 0.92813   | -2.038698 | 1 | 1 LTF           | K17283 |
| ENSG00000021300 | 0.92813   | -2.038698 | 1 | 1 PLEKHB1       | -      |
| ENSG00000049283 | 0.92813   | -2.038698 | 1 | 1 EPN3          | K12471 |
| ENSG00000064655 | 0.92813   | -2.038698 | 1 | 1 EYA2          | K17620 |
| ENSG00000072952 | 0.92813   | -2.038698 | 1 | 1 MRVI1         | K12337 |
| ENSG00000076344 | 0.92813   | -2.038698 | 1 | 1 RGS11         | K16449 |
| ENSG00000080618 | 0.92813   | -2.038698 | 1 | 1 CPB2          | K01300 |
| ENSG00000100604 | 0.92813   | -2.038698 | 1 | 1 CHGA          | -      |
| ENSG00000101017 | 0.92813   | -2.038698 | 1 | 1 CD40          | K03160 |
| ENSG00000101955 | 0.92813   | -2.038698 | 1 | 1 SRPX          | -      |
| ENSG00000102081 | 0.92813   | -2.038698 | 1 | 1 FMR1          | K15516 |
| ENSG00000103710 | 0.92813   | -2.038698 | 1 | 1 RASL12        | K07854 |
| ENSG00000103742 | 0.92813   | -2.038698 | 1 | 1 IGDCC4        | -      |
| ENSG00000103832 | 0.92813   | -2.038698 | 1 | 1 GOLGA8UP      | K10595 |
| ENSG00000104537 | 0.92813   | -2.038698 | 1 | 1 ANXA13        | -      |
| ENSG00000104879 | 0.92813   | -2.038698 | 1 | 1 CKM           | K00933 |
| ENSG00000105679 | 0.92813   | -2.038698 | 1 | 1 GAPDHS        | K10705 |
| ENSG00000106804 | 0.92813   | -2.038698 | 1 | 1 C5            | K03994 |
| ENSG00000108556 | 0.92813   | -2.038698 | 1 | 1 CHRNE         | K04817 |
| ENSG00000109927 | 0.92813   | -2.038698 | 1 | 1 TECTA         | K18273 |
| ENSG00000110693 | 0.92813   | -2.038698 | 1 | 1 SOX6          | -      |
| ENSG00000110900 | 0.92813   | -2.038698 | 1 | 1 TSPAN11       | K17352 |
| ENSG00000111405 | 0.92813   | -2.038698 | 1 | 1 ENDOU         | K14648 |
| ENSG00000111729 | 0.92813   | -2.038698 | 1 | 1 CLEC4A        | K10057 |
| ENSG00000113722 | 0.92813   | -2.038698 | 1 | 1 CDX1          | K09312 |
| ENSG00000114013 | 0.92813   | -2.038698 | 1 | 1 CD86          | K05413 |
| ENSG00000114948 | 0.92813   | -2.038698 | 1 | 1 ADAM23        | K06837 |
| ENSG00000117020 | 0.92813   | -2.038698 | 1 | 1 AKT3          | K04456 |
| ENSG00000120332 | 0.92813   | -2.038698 | 1 | 1 TNN           | K06252 |
| ENSG00000120500 | 0.92813   | -2.038698 | 1 | 1 ARR3          | K13801 |
| ENSG00000120664 | 0.92813   | -2.038698 | 1 | 1 SPG20OS       | -      |
| ENSG00000121053 | 0.92813   | -2.038698 | 1 | 1 EPX           | K10788 |
| ENSG00000124399 | 0.92813   | -2.038698 | 1 | 1 RP11-663P9.2  | K03960 |
| ENSG00000124882 | 0.92813   | -2.038698 | 1 | 1 EREG          | K09784 |
| ENSG00000125931 | 0.92813   | -2.038698 | 1 | 1 CITED1        | -      |
| ENSG00000126264 | 0.92813   | -2.038698 | 1 | 1 HCST          | K07988 |
| ENSG00000128591 | 0.92813   | -2.038698 | 1 | 1 FLNC          | K04437 |
| ENSG00000129990 | 0.92813   | -2.038698 | 1 | 1 SYT5          | -      |
| ENSG00000130612 | 0.92813   | -2.038698 | 1 | 1 CYP2G1P       | K07417 |
| ENSG00000131044 | 0.92813   | -2.038698 | 1 | 1 TTLL9         | K16603 |
| ENSG00000131067 | 0.92813   | -2.038698 | 1 | 1 GGT7          | K00681 |
| ENSG00000132437 | 0.92813   | -2.038698 | 1 | 1 DDC           | K01593 |
| ENSG00000133063 | 0.92813   | -2.038698 | 1 | 1 CHIT1         | K01183 |
| ENSG00000134775 | 0.92813   | -2.038698 | 1 | 1 FHOD3         | -      |
| ENSG00000134827 | 0.92813   | -2.038698 | 1 | 1 TCN1          | -      |
| ENSG00000135248 | 0.92813   | -2.038698 | 1 | 1 FAM71F1       | -      |
| ENSG00000135454 | 0.92813   | -2.038698 | 1 | 1 B4GALNT1      | K00725 |
| ENSG00000136931 | 0.92813   | -2.038698 | 1 | 1 NR5A1         | K08560 |
| ENSG00000137463 | 0.92813   | -2.038698 | 1 | 1 MGARP         | -      |
| ENSG00000137869 | 0.92813   | -2.038698 | 1 | 1 CYP19A1       | K07434 |
| ENSG00000142538 | 0.92813   | -2.038698 | 1 | 1 PTH2          | -      |
| ENSG00000143858 | 0.92813   | -2.038698 | 1 | 1 SYT2          | K15290 |
| ENSG00000145248 | 0.92813   | -2.038698 | 1 | 1 SLC10A4       | K14344 |
| ENSG00000145703 | 0.92813   | -2.038698 | 1 | 1 IQGAP2        | K05767 |
| ENSG00000147465 | 0.92813   | -2.038698 | 1 | 1 STAR          | K16931 |
| ENSG00000153060 | 0.92813   | -2.038698 | 1 | 1 TEK5          | K18632 |

|                 |         |           |   |                 |        |
|-----------------|---------|-----------|---|-----------------|--------|
| ENSG00000153093 | 0.92813 | -2.038698 | 1 | 1 ACOXL         | K04613 |
| ENSG00000153930 | 0.92813 | -2.038698 | 1 | 1 ANKFN1        | -      |
| ENSG00000154537 | 0.92813 | -2.038698 | 1 | 1 FAM27C        | -      |
| ENSG00000154645 | 0.92813 | -2.038698 | 1 | 1 CHODL         | K10078 |
| ENSG00000157211 | 0.92813 | -2.038698 | 1 | 1 CDCP2         | -      |
| ENSG00000157551 | 0.92813 | -2.038698 | 1 | 1 KCNJ15        | K05008 |
| ENSG00000158683 | 0.92813 | -2.038698 | 1 | 1 PKD1L1        | K04987 |
| ENSG00000159261 | 0.92813 | -2.038698 | 1 | 1 CLDN14        | K06087 |
| ENSG00000160951 | 0.92813 | -2.038698 | 1 | 1 PTGER1        | K04258 |
| ENSG00000161798 | 0.92813 | -2.038698 | 1 | 1 AQP5          | K09867 |
| ENSG00000162069 | 0.92813 | -2.038698 | 1 | 1 CCDC64B       | K16756 |
| ENSG00000162490 | 0.92813 | -2.038698 | 1 | 1 DRAXIN        | K17985 |
| ENSG00000162552 | 0.92813 | -2.038698 | 1 | 1 WNT4          | K00408 |
| ENSG00000162777 | 0.92813 | -2.038698 | 1 | 1 DENND2D       | -      |
| ENSG00000162888 | 0.92813 | -2.038698 | 1 | 1 C1orf147      | K07211 |
| ENSG00000163106 | 0.92813 | -2.038698 | 1 | 1 HPGDS         | K01830 |
| ENSG00000163508 | 0.92813 | -2.038698 | 1 | 1 EOMES         | K10173 |
| ENSG00000163576 | 0.92813 | -2.038698 | 1 | 1 EFHB          | -      |
| ENSG00000163815 | 0.92813 | -2.038698 | 1 | 1 CLEC3B        | K17520 |
| ENSG00000164485 | 0.92813 | -2.038698 | 1 | 1 IL22RA2       | K05139 |
| ENSG00000164647 | 0.92813 | -2.038698 | 1 | 1 STEAP1        | K14737 |
| ENSG00000165462 | 0.92813 | -2.038698 | 1 | 1 PHOX2A        | K09330 |
| ENSG00000166387 | 0.92813 | -2.038698 | 1 | 1 PPFIBP2       | -      |
| ENSG00000166492 | 0.92813 | -2.038698 | 1 | 1 FAM86GP       | -      |
| ENSG00000167654 | 0.92813 | -2.038698 | 1 | 1 ATCAY         | K08857 |
| ENSG00000167774 | 0.92813 | -2.038698 | 1 | 1 NDUFA7        | K03951 |
| ENSG00000168918 | 0.92813 | -2.038698 | 1 | 1 INPP5D        | K03084 |
| ENSG00000169896 | 0.92813 | -2.038698 | 1 | 1 ITGAM         | K06461 |
| ENSG00000170748 | 0.92813 | -2.038698 | 1 | 1 RBMXL2        | K12885 |
| ENSG00000171385 | 0.92813 | -2.038698 | 1 | 1 KCND3         | K04893 |
| ENSG00000171812 | 0.92813 | -2.038698 | 1 | 1 COL8A2        | -      |
| ENSG00000171931 | 0.92813 | -2.038698 | 1 | 1 FBXW10        | K10266 |
| ENSG00000172901 | 0.92813 | -2.038698 | 1 | 1 AQPEP         | K13724 |
| ENSG00000173626 | 0.92813 | -2.038698 | 1 | 1 TRAPPC3L      | -      |
| ENSG00000173678 | 0.92813 | -2.038698 | 1 | 1 SPDYE2B       | K08694 |
| ENSG00000174004 | 0.92813 | -2.038698 | 1 | 1 NRROS         | -      |
| ENSG00000174502 | 0.92813 | -2.038698 | 1 | 1 SLC26A9       | K14706 |
| ENSG00000175356 | 0.92813 | -2.038698 | 1 | 1 SCUBE2        | -      |
| ENSG00000176236 | 0.92813 | -2.038698 | 1 | 1 C10orf111     | K17985 |
| ENSG00000176349 | 0.92813 | -2.038698 | 1 | 1 AC110781.3    | -      |
| ENSG00000176444 | 0.92813 | -2.038698 | 1 | 1 CLK2          | K08823 |
| ENSG00000176510 | 0.92813 | -2.038698 | 1 | 1 OR10AC1P      | K04257 |
| ENSG00000177182 | 0.92813 | -2.038698 | 1 | 1 CLVS1         | K16467 |
| ENSG00000177359 | 0.92813 | -2.038698 | 1 | 1 RP11-551L14.1 | -      |
| ENSG00000177993 | 0.92813 | -2.038698 | 1 | 1 ZNRF3-AS1     | -      |
| ENSG00000178193 | 0.92813 | -2.038698 | 1 | 1 RP4-682C21.5  | -      |
| ENSG00000178412 | 0.92813 | -2.038698 | 1 | 1 RP11-567M16.3 | -      |
| ENSG00000179061 | 0.92813 | -2.038698 | 1 | 1 AC012074.1    | -      |
| ENSG00000179165 | 0.92813 | -2.038698 | 1 | 1 PXT1          | -      |
| ENSG00000179219 | 0.92813 | -2.038698 | 1 | 1 LINC00311     | -      |
| ENSG00000179776 | 0.92813 | -2.038698 | 1 | 1 CDH5          | K06533 |
| ENSG00000180210 | 0.92813 | -2.038698 | 1 | 1 F2            | K01313 |
| ENSG00000180211 | 0.92813 | -2.038698 | 1 | 1 RP1-278E11.3  | K02894 |
| ENSG00000182218 | 0.92813 | -2.038698 | 1 | 1 HHIPL1        | -      |
| ENSG00000183484 | 0.92813 | -2.038698 | 1 | 1 GPR132        | K08426 |
| ENSG00000183535 | 0.92813 | -2.038698 | 1 | 1 COL18A1-AS1   | -      |
| ENSG00000184040 | 0.92813 | -2.038698 | 1 | 1 TMEM236       | K14404 |
| ENSG00000184492 | 0.92813 | -2.038698 | 1 | 1 FOXD4L1       | K09397 |

|                 |         |           |   |                 |        |
|-----------------|---------|-----------|---|-----------------|--------|
| ENSG00000185038 | 0.92813 | -2.038698 | 1 | 1 MROH2A        | -      |
| ENSG00000186207 | 0.92813 | -2.038698 | 1 | 1 LCE5A         | -      |
| ENSG00000186393 | 0.92813 | -2.038698 | 1 | 1 KRT26         | K07604 |
| ENSG00000186471 | 0.92813 | -2.038698 | 1 | 1 AKAP14        | K16530 |
| ENSG00000187627 | 0.92813 | -2.038698 | 1 | 1 RGPDI         | K12172 |
| ENSG00000188112 | 0.92813 | -2.038698 | 1 | 1 C6orf132      | K17985 |
| ENSG00000188163 | 0.92813 | -2.038698 | 1 | 1 FAM166A       | -      |
| ENSG00000188783 | 0.92813 | -2.038698 | 1 | 1 PRELP         | K08125 |
| ENSG00000188916 | 0.92813 | -2.038698 | 1 | 1 FAM196A       | -      |
| ENSG00000189051 | 0.92813 | -2.038698 | 1 | 1 RNF222        | K17985 |
| ENSG00000189167 | 0.92813 | -2.038698 | 1 | 1 ZAR1L         | K18762 |
| ENSG00000189212 | 0.92813 | -2.038698 | 1 | 1 DPY19L2P1     | -      |
| ENSG00000196183 | 0.92813 | -2.038698 | 1 | 1 RPS2P4        | K02981 |
| ENSG00000196189 | 0.92813 | -2.038698 | 1 | 1 SEMA4A        | K06521 |
| ENSG00000196532 | 0.92813 | -2.038698 | 1 | 1 HIST1H3C      | K11253 |
| ENSG00000196611 | 0.92813 | -2.038698 | 1 | 1 MMP1          | K01388 |
| ENSG00000196993 | 0.92813 | -2.038698 | 1 | 1 NPIPB9        | -      |
| ENSG00000197446 | 0.92813 | -2.038698 | 1 | 1 CYP2F1        | K07416 |
| ENSG00000197457 | 0.92813 | -2.038698 | 1 | 1 STMN3         | -      |
| ENSG00000197697 | 0.92813 | -2.038698 | 1 | 1 HIST1H2BE     | K11252 |
| ENSG00000198771 | 0.92813 | -2.038698 | 1 | 1 RCSD1         | K09488 |
| ENSG00000199509 | 0.92813 | -2.038698 | 1 | 1 RNA5SP477     | -      |
| ENSG00000200135 | 0.92813 | -2.038698 | 1 | 1 Y_RNA         | -      |
| ENSG00000200170 | 0.92813 | -2.038698 | 1 | 1 Y_RNA         | -      |
| ENSG00000200309 | 0.92813 | -2.038698 | 1 | 1 Y_RNA         | -      |
| ENSG00000200815 | 0.92813 | -2.038698 | 1 | 1 RNU6-1091P    | -      |
| ENSG00000201151 | 0.92813 | -2.038698 | 1 | 1 SNORD56       | -      |
| ENSG00000201944 | 0.92813 | -2.038698 | 1 | 1 SNORA72       | -      |
| ENSG00000202260 | 0.92813 | -2.038698 | 1 | 1 RN7SKP69      | -      |
| ENSG00000202434 | 0.92813 | -2.038698 | 1 | 1 SNORA4        | -      |
| ENSG00000202461 | 0.92813 | -2.038698 | 1 | 1 Y_RNA         | -      |
| ENSG00000203589 | 0.92813 | -2.038698 | 1 | 1 RP5-886K2.1   | K17985 |
| ENSG00000203630 | 0.92813 | -2.038698 | 1 | 1 AL136531.1    | K04613 |
| ENSG00000204055 | 0.92813 | -2.038698 | 1 | 1 RP11-247A12.2 | -      |
| ENSG00000204388 | 0.92813 | -2.038698 | 1 | 1 HSPA1B        | K03283 |
| ENSG00000204583 | 0.92813 | -2.038698 | 1 | 1 LRCOL1        | -      |
| ENSG00000205018 | 0.92813 | -2.038698 | 1 | 1 RP11-830F9.6  | -      |
| ENSG00000205022 | 0.92813 | -2.038698 | 1 | 1 PABPN1L       | K14396 |
| ENSG00000205217 | 0.92813 | -2.038698 | 1 | 1 FAM106B       | -      |
| ENSG00000206603 | 0.92813 | -2.038698 | 1 | 1 SNORA22       | -      |
| ENSG00000206634 | 0.92813 | -2.038698 | 1 | 1 SNORA22       | -      |
| ENSG00000206728 | 0.92813 | -2.038698 | 1 | 1 Y_RNA         | -      |
| ENSG00000206848 | 0.92813 | -2.038698 | 1 | 1 RNU6-890P     | -      |
| ENSG00000207588 | 0.92813 | -2.038698 | 1 | 1 MIR593        | -      |
| ENSG00000213394 | 0.92813 | -2.038698 | 1 | 1 RP4-747G18.5  | K02998 |
| ENSG00000213432 | 0.92813 | -2.038698 | 1 | 1 RP11-624L12.1 | K02880 |
| ENSG00000213613 | 0.92813 | -2.038698 | 1 | 1 RP11-380G5.3  | K02868 |
| ENSG00000213714 | 0.92813 | -2.038698 | 1 | 1 FAM209B       | -      |
| ENSG00000214359 | 0.92813 | -2.038698 | 1 | 1 RPL18P10      | K02883 |
| ENSG00000214546 | 0.92813 | -2.038698 | 1 | 1 AC087491.2    | -      |
| ENSG00000214548 | 0.92813 | -2.038698 | 1 | 1 MEG3          | -      |
| ENSG00000214875 | 0.92813 | -2.038698 | 1 | 1 MED28P1       | K15141 |
| ENSG00000215045 | 0.92813 | -2.038698 | 1 | 1 GRID2IP       | -      |
| ENSG00000215811 | 0.92813 | -2.038698 | 1 | 1 BTNL10        | -      |
| ENSG00000215915 | 0.92813 | -2.038698 | 1 | 1 ATAD3C        | K17681 |
| ENSG00000216624 | 0.92813 | -2.038698 | 1 | 1 GAPDHP72      | K00134 |
| ENSG00000216863 | 0.92813 | -2.038698 | 1 | 1 LY86-AS1      | -      |
| ENSG00000217442 | 0.92813 | -2.038698 | 1 | 1 SYCE3         | K19536 |

|                 |         |           |   |                 |        |
|-----------------|---------|-----------|---|-----------------|--------|
| ENSG00000219392 | 0.92813 | -2.038698 | 1 | 1 RP1-265C24.5  | K09228 |
| ENSG00000220305 | 0.92813 | -2.038698 | 1 | 1 HNRNPH1P1     | K12898 |
| ENSG00000221340 | 0.92813 | -2.038698 | 1 | 1 RNU6ATAC18P   | -      |
| ENSG00000222020 | 0.92813 | -2.038698 | 1 | 1 AC062017.1    | -      |
| ENSG00000222040 | 0.92813 | -2.038698 | 1 | 1 ADRA2B        | K04139 |
| ENSG00000222389 | 0.92813 | -2.038698 | 1 | 1 RNU2-28P      | -      |
| ENSG00000222800 | 0.92813 | -2.038698 | 1 | 1 RNU2-62P      | -      |
| ENSG00000223060 | 0.92813 | -2.038698 | 1 | 1 Y_RNA         | -      |
| ENSG00000223117 | 0.92813 | -2.038698 | 1 | 1 RN7SKP296     | -      |
| ENSG00000223390 | 0.92813 | -2.038698 | 1 | 1 RP11-91A18.4  | -      |
| ENSG00000223791 | 0.92813 | -2.038698 | 1 | 1 UBE2E1-AS1    | -      |
| ENSG00000223923 | 0.92813 | -2.038698 | 1 | 1 AC010136.2    | -      |
| ENSG00000224124 | 0.92813 | -2.038698 | 1 | 1 POM121L10P    | -      |
| ENSG00000224269 | 0.92813 | -2.038698 | 1 | 1 AP000697.6    | -      |
| ENSG00000224644 | 0.92813 | -2.038698 | 1 | 1 RP11-16L21.7  | -      |
| ENSG00000224677 | 0.92813 | -2.038698 | 1 | 1 PDIA3P2       | K08056 |
| ENSG00000224715 | 0.92813 | -2.038698 | 1 | 1 CITF22-49D8.1 | -      |
| ENSG00000224750 | 0.92813 | -2.038698 | 1 | 1 RP11-94M14.2  | -      |
| ENSG00000224885 | 0.92813 | -2.038698 | 1 | 1 TSSC1-IT1     | -      |
| ENSG00000225093 | 0.92813 | -2.038698 | 1 | 1 RPL3P7        | K02925 |
| ENSG00000225099 | 0.92813 | -2.038698 | 1 | 1 ATP6V1E1P1    | K02150 |
| ENSG00000225278 | 0.92813 | -2.038698 | 1 | 1 RP11-782C8.5  | -      |
| ENSG00000225353 | 0.92813 | -2.038698 | 1 | 1 RP11-292F9.1  | -      |
| ENSG00000225643 | 0.92813 | -2.038698 | 1 | 1 RP11-70P17.1  | -      |
| ENSG00000225805 | 0.92813 | -2.038698 | 1 | 1 CTD-2313N18.7 | K10803 |
| ENSG00000226002 | 0.92813 | -2.038698 | 1 | 1 RP11-460N20.5 | K03121 |
| ENSG00000226104 | 0.92813 | -2.038698 | 1 | 1 AC011475.1    | K17557 |
| ENSG00000226245 | 0.92813 | -2.038698 | 1 | 1 ZNF32-AS1     | -      |
| ENSG00000226247 | 0.92813 | -2.038698 | 1 | 1 AC005034.3    | K15171 |
| ENSG00000226310 | 0.92813 | -2.038698 | 1 | 1 RP3-323P24.3  | -      |
| ENSG00000226438 | 0.92813 | -2.038698 | 1 | 1 RP11-420K8.1  | -      |
| ENSG00000226652 | 0.92813 | -2.038698 | 1 | 1 PSMD10P2      | K06694 |
| ENSG00000226851 | 0.92813 | -2.038698 | 1 | 1 AC004112.4    | -      |
| ENSG00000226963 | 0.92813 | -2.038698 | 1 | 1 AC078883.4    | -      |
| ENSG00000227057 | 0.92813 | -2.038698 | 1 | 1 WDR46         | K14768 |
| ENSG00000227145 | 0.92813 | -2.038698 | 1 | 1 IL21-AS1      | -      |
| ENSG00000227203 | 0.92813 | -2.038698 | 1 | 1 SUB1P1        | -      |
| ENSG00000227321 | 0.92813 | -2.038698 | 1 | 1 MTND4P15      | -      |
| ENSG00000227473 | 0.92813 | -2.038698 | 1 | 1 TSSK5P1       | -      |
| ENSG00000227620 | 0.92813 | -2.038698 | 1 | 1 ALG1L8P       | K03842 |
| ENSG00000227684 | 0.92813 | -2.038698 | 1 | 1 CROCCP4       | K16469 |
| ENSG00000227694 | 0.92813 | -2.038698 | 1 | 1 AC005884.1    | K02893 |
| ENSG00000228028 | 0.92813 | -2.038698 | 1 | 1 AC069257.8    | -      |
| ENSG00000228037 | 0.92813 | -2.038698 | 1 | 1 RP3-395M20.9  | -      |
| ENSG00000228187 | 0.92813 | -2.038698 | 1 | 1 RP11-363H12.1 | K07050 |
| ENSG00000228264 | 0.92813 | -2.038698 | 1 | 1 RP11-350G8.7  | K03031 |
| ENSG00000228389 | 0.92813 | -2.038698 | 1 | 1 AC068039.4    | -      |
| ENSG00000228434 | 0.92813 | -2.038698 | 1 | 1 AC004951.6    | -      |
| ENSG00000228478 | 0.92813 | -2.038698 | 1 | 1 RP1-290I10.3  | -      |
| ENSG00000228540 | 0.92813 | -2.038698 | 1 | 1 AC073326.3    | -      |
| ENSG00000228960 | 0.92813 | -2.038698 | 1 | 1 OR2A9P        | K04257 |
| ENSG00000229153 | 0.92813 | -2.038698 | 1 | 1 EPHA1-AS1     | -      |
| ENSG00000229184 | 0.92813 | -2.038698 | 1 | 1 RP11-255J3.3  | K02138 |
| ENSG00000229327 | 0.92813 | -2.038698 | 1 | 1 RP11-135A24.2 | -      |
| ENSG00000229930 | 0.92813 | -2.038698 | 1 | 1 RP11-504P24.5 | K10305 |
| ENSG00000229956 | 0.92813 | -2.038698 | 1 | 1 ZRANB2-AS2    | -      |
| ENSG00000230148 | 0.92813 | -2.038698 | 1 | 1 HOXB-AS1      | -      |
| ENSG00000230183 | 0.92813 | -2.038698 | 1 | 1 CNOT6LP1      | K12603 |

|                 |         |           |   |                  |        |
|-----------------|---------|-----------|---|------------------|--------|
| ENSG00000230415 | 0.92813 | -2.038698 | 1 | 1 RP5-902P8.10   | -      |
| ENSG00000230433 | 0.92813 | -2.038698 | 1 | 1 RP1-20B11.2    | -      |
| ENSG00000230510 | 0.92813 | -2.038698 | 1 | 1 PPP5D1         | K04460 |
| ENSG00000230581 | 0.92813 | -2.038698 | 1 | 1 RP11-390F4.8   | K05692 |
| ENSG00000230626 | 0.92813 | -2.038698 | 1 | 1 RP11-286H14.4  | K04369 |
| ENSG00000230825 | 0.92813 | -2.038698 | 1 | 1 AC005532.5     | -      |
| ENSG00000230912 | 0.92813 | -2.038698 | 1 | 1 RP3-508I15.10  | -      |
| ENSG00000230952 | 0.92813 | -2.038698 | 1 | 1 AC099344.2     | -      |
| ENSG00000230953 | 0.92813 | -2.038698 | 1 | 1 RP4-631H13.6   | K07604 |
| ENSG00000231057 | 0.92813 | -2.038698 | 1 | 1 RP11-122M14.1  | -      |
| ENSG00000231460 | 0.92813 | -2.038698 | 1 | 1 RP11-321L2.1   | -      |
| ENSG00000231528 | 0.92813 | -2.038698 | 1 | 1 FAM225A        | -      |
| ENSG00000231705 | 0.92813 | -2.038698 | 1 | 1 RP11-432J24.2  | -      |
| ENSG00000231747 | 0.92813 | -2.038698 | 1 | 1 AC079922.2     | K02969 |
| ENSG00000231831 | 0.92813 | -2.038698 | 1 | 1 MTHFD1P1       | K00288 |
| ENSG00000232019 | 0.92813 | -2.038698 | 1 | 1 AC074183.4     | -      |
| ENSG00000232057 | 0.92813 | -2.038698 | 1 | 1 AC093390.1     | -      |
| ENSG00000232059 | 0.92813 | -2.038698 | 1 | 1 RP11-173A6.2   | K02922 |
| ENSG00000232104 | 0.92813 | -2.038698 | 1 | 1 RP11-509J21.1  | -      |
| ENSG00000232118 | 0.92813 | -2.038698 | 1 | 1 BACH1-AS1      | -      |
| ENSG00000232134 | 0.92813 | -2.038698 | 1 | 1 RPS15AP12      | K02957 |
| ENSG00000232162 | 0.92813 | -2.038698 | 1 | 1 USP12-AS1      | -      |
| ENSG00000232546 | 0.92813 | -2.038698 | 1 | 1 RP11-458F8.1   | K03121 |
| ENSG00000232618 | 0.92813 | -2.038698 | 1 | 1 RP11-439L18.1  | -      |
| ENSG00000232627 | 0.92813 | -2.038698 | 1 | 1 AC021876.4     | K02910 |
| ENSG00000232662 | 0.92813 | -2.038698 | 1 | 1 LDHBP1         | K00016 |
| ENSG00000233045 | 0.92813 | -2.038698 | 1 | 1 AC097523.1     | K02877 |
| ENSG00000233098 | 0.92813 | -2.038698 | 1 | 1 RP11-344E13.3  | -      |
| ENSG00000233232 | 0.92813 | -2.038698 | 1 | 1 NPIP7          | -      |
| ENSG00000233297 | 0.92813 | -2.038698 | 1 | 1 RASA4DP        | K17630 |
| ENSG00000233334 | 0.92813 | -2.038698 | 1 | 1 FAM53B-AS1     | -      |
| ENSG00000233578 | 0.92813 | -2.038698 | 1 | 1 RP5-1022P6.3   | K03259 |
| ENSG00000233673 | 0.92813 | -2.038698 | 1 | 1 ANAPC1P1       | K03348 |
| ENSG00000233838 | 0.92813 | -2.038698 | 1 | 1 DPH3P1         | K15455 |
| ENSG00000233851 | 0.92813 | -2.038698 | 1 | 1 LATS2-AS1      | -      |
| ENSG00000233912 | 0.92813 | -2.038698 | 1 | 1 AC026202.3     | -      |
| ENSG00000233994 | 0.92813 | -2.038698 | 1 | 1 GDI2P2         | K17255 |
| ENSG00000234003 | 0.92813 | -2.038698 | 1 | 1 CTD-3105H18.11 | -      |
| ENSG00000234396 | 0.92813 | -2.038698 | 1 | 1 RP11-181G12.4  | -      |
| ENSG00000234969 | 0.92813 | -2.038698 | 1 | 1 RP13-33H18.1   | K07050 |
| ENSG00000235044 | 0.92813 | -2.038698 | 1 | 1 PPIAP3         | K03767 |
| ENSG00000235236 | 0.92813 | -2.038698 | 1 | 1 RP13-131K19.1  | -      |
| ENSG00000235488 | 0.92813 | -2.038698 | 1 | 1 JARID2-AS1     | -      |
| ENSG00000235590 | 0.92813 | -2.038698 | 1 | 1 GNAS-AS1       | -      |
| ENSG00000235724 | 0.92813 | -2.038698 | 1 | 1 AC009299.2     | -      |
| ENSG00000235790 | 0.92813 | -2.038698 | 1 | 1 RP11-73M7.6    | -      |
| ENSG00000235834 | 0.92813 | -2.038698 | 1 | 1 RP1-60N8.1     | -      |
| ENSG00000235847 | 0.92813 | -2.038698 | 1 | 1 LDHAP7         | K00016 |
| ENSG00000235904 | 0.92813 | -2.038698 | 1 | 1 RBMS3-AS3      | -      |
| ENSG00000236045 | 0.92813 | -2.038698 | 1 | 1 RP3-467K16.7   | -      |
| ENSG00000236375 | 0.92813 | -2.038698 | 1 | 1 POU5F1P5       | K09367 |
| ENSG00000236577 | 0.92813 | -2.038698 | 1 | 1 SNRPGP14       | -      |
| ENSG00000236627 | 0.92813 | -2.038698 | 1 | 1 RP11-252P19.1  | -      |
| ENSG00000236733 | 0.92813 | -2.038698 | 1 | 1 RP11-203L2.4   | -      |
| ENSG00000236844 | 0.92813 | -2.038698 | 1 | 1 AC091633.2     | K02896 |
| ENSG00000236932 | 0.92813 | -2.038698 | 1 | 1 CEACAMP8       | K06499 |
| ENSG00000236933 | 0.92813 | -2.038698 | 1 | 1 RP11-439A17.7  | -      |
| ENSG00000237135 | 0.92813 | -2.038698 | 1 | 1 DDX10P1        | -      |

|                 |         |           |   |                  |        |
|-----------------|---------|-----------|---|------------------|--------|
| ENSG00000237471 | 0.92813 | -2.038698 | 1 | 1 AC073115.6     | -      |
| ENSG00000237567 | 0.92813 | -2.038698 | 1 | 1 RP3-359N14.2   | -      |
| ENSG00000237704 | 0.92813 | -2.038698 | 1 | 1 AP004289.2     | K18403 |
| ENSG00000238001 | 0.92813 | -2.038698 | 1 | 1 RP11-555J4.2   | K11095 |
| ENSG00000238098 | 0.92813 | -2.038698 | 1 | 1 ABCA17P        | K05643 |
| ENSG00000239063 | 0.92813 | -2.038698 | 1 | 1 snoU13         | -      |
| ENSG00000239636 | 0.92813 | -2.038698 | 1 | 1 RP4-728D4.2    | -      |
| ENSG00000239828 | 0.92813 | -2.038698 | 1 | 1 RP11-446H18.5  | -      |
| ENSG00000240007 | 0.92813 | -2.038698 | 1 | 1 RP6-206I17.4   | -      |
| ENSG00000240132 | 0.92813 | -2.038698 | 1 | 1 ETF1P2         | K03265 |
| ENSG00000240216 | 0.92813 | -2.038698 | 1 | 1 CPHL1P         | K13624 |
| ENSG00000240373 | 0.92813 | -2.038698 | 1 | 1 SEC62-AS1      | -      |
| ENSG00000240695 | 0.92813 | -2.038698 | 1 | 1 RP11-102M11.1  | K09528 |
| ENSG00000240751 | 0.92813 | -2.038698 | 1 | 1 RP11-553D4.2   | K05956 |
| ENSG00000240771 | 0.92813 | -2.038698 | 1 | 1 ARHGEF25       | -      |
| ENSG00000240964 | 0.92813 | -2.038698 | 1 | 1 RN7SL751P      | -      |
| ENSG00000241475 | 0.92813 | -2.038698 | 1 | 1 RP4-781K5.5    | -      |
| ENSG00000241484 | 0.92813 | -2.038698 | 1 | 1 ARHGAP8        | K18034 |
| ENSG00000242602 | 0.92813 | -2.038698 | 1 | 1 CTD-2339M3.1   | K02917 |
| ENSG00000242797 | 0.92813 | -2.038698 | 1 | 1 GLYCTK-AS1     | -      |
| ENSG00000242876 | 0.92813 | -2.038698 | 1 | 1 RN7SL812P      | -      |
| ENSG00000243107 | 0.92813 | -2.038698 | 1 | 1 AC000120.7     | -      |
| ENSG00000243504 | 0.92813 | -2.038698 | 1 | 1 RPS23P1        | K02973 |
| ENSG00000243550 | 0.92813 | -2.038698 | 1 | 1 RP11-483E7.1   | -      |
| ENSG00000243650 | 0.92813 | -2.038698 | 1 | 1 RN7SL834P      | -      |
| ENSG00000243961 | 0.92813 | -2.038698 | 1 | 1 RP5-839B4.8    | -      |
| ENSG00000243978 | 0.92813 | -2.038698 | 1 | 1 RGAG1          | -      |
| ENSG00000244219 | 0.92813 | -2.038698 | 1 | 1 GS1-259H13.2   | -      |
| ENSG00000244265 | 0.92813 | -2.038698 | 1 | 1 SIAH2-AS1      | -      |
| ENSG00000244535 | 0.92813 | -2.038698 | 1 | 1 RP1-181J22.1   | K02915 |
| ENSG00000244752 | 0.92813 | -2.038698 | 1 | 1 CRYBB2         | -      |
| ENSG00000245552 | 0.92813 | -2.038698 | 1 | 1 RP11-712B9.2   | -      |
| ENSG00000245748 | 0.92813 | -2.038698 | 1 | 1 RP11-367J11.2  | -      |
| ENSG00000248318 | 0.92813 | -2.038698 | 1 | 1 RP11-713M15.1  | -      |
| ENSG00000248377 | 0.92813 | -2.038698 | 1 | 1 HMGNI1P9       | K11299 |
| ENSG00000248445 | 0.92813 | -2.038698 | 1 | 1 CTB-118N6.3    | -      |
| ENSG00000248599 | 0.92813 | -2.038698 | 1 | 1 RP11-302J23.1  | -      |
| ENSG00000248643 | 0.92813 | -2.038698 | 1 | 1 RBM14-RBM4     | K13187 |
| ENSG00000248648 | 0.92813 | -2.038698 | 1 | 1 RP11-485M7.1   | K03948 |
| ENSG00000248774 | 0.92813 | -2.038698 | 1 | 1 RP11-798M19.3  | -      |
| ENSG00000249084 | 0.92813 | -2.038698 | 1 | 1 RP11-376O6.2   | -      |
| ENSG00000249188 | 0.92813 | -2.038698 | 1 | 1 ENPP7P1        | K12354 |
| ENSG00000249502 | 0.92813 | -2.038698 | 1 | 1 AC006160.5     | -      |
| ENSG00000249623 | 0.92813 | -2.038698 | 1 | 1 RP11-610J23.1  | -      |
| ENSG00000249690 | 0.92813 | -2.038698 | 1 | 1 RP11-1336O20.2 | -      |
| ENSG00000249911 | 0.92813 | -2.038698 | 1 | 1 RP11-122C5.1   | -      |
| ENSG00000250130 | 0.92813 | -2.038698 | 1 | 1 RP11-616K22.1  | K00134 |
| ENSG00000250131 | 0.92813 | -2.038698 | 1 | 1 RP11-130F10.1  | -      |
| ENSG00000250192 | 0.92813 | -2.038698 | 1 | 1 RP11-300M6.1   | -      |
| ENSG00000250556 | 0.92813 | -2.038698 | 1 | 1 CCDC34P1       | -      |
| ENSG00000250917 | 0.92813 | -2.038698 | 1 | 1 RP4-785G19.5   | -      |
| ENSG00000251050 | 0.92813 | -2.038698 | 1 | 1 RP11-168A11.4  | -      |
| ENSG00000251127 | 0.92813 | -2.038698 | 1 | 1 RP11-280G9.1   | -      |
| ENSG00000251448 | 0.92813 | -2.038698 | 1 | 1 RP11-71E19.2   | -      |
| ENSG00000251520 | 0.92813 | -2.038698 | 1 | 1 RP11-46A10.6   | -      |
| ENSG00000251548 | 0.92813 | -2.038698 | 1 | 1 RP11-215G15.4  | -      |
| ENSG00000251665 | 0.92813 | -2.038698 | 1 | 1 RP11-700H6.2   | -      |
| ENSG00000251720 | 0.92813 | -2.038698 | 1 | 1 RNU7-123P      | -      |

|                 |         |           |   |                  |        |
|-----------------|---------|-----------|---|------------------|--------|
| ENSG00000251749 | 0.92813 | -2.038698 | 1 | 1 U3             | --     |
| ENSG00000252847 | 0.92813 | -2.038698 | 1 | 1 RNU2-46P       | --     |
| ENSG00000252910 | 0.92813 | -2.038698 | 1 | 1 RNU7-177P      | --     |
| ENSG00000253194 | 0.92813 | -2.038698 | 1 | 1 RP11-351A11.1  | --     |
| ENSG00000253214 | 0.92813 | -2.038698 | 1 | 1 RP11-1149M10.2 | --     |
| ENSG00000253618 | 0.92813 | -2.038698 | 1 | 1 GRPEL2-AS1     | --     |
| ENSG00000253754 | 0.92813 | -2.038698 | 1 | 1 RP11-35G22.1   | --     |
| ENSG00000254420 | 0.92813 | -2.038698 | 1 | 1 RP11-452H21.1  | --     |
| ENSG00000254431 | 0.92813 | -2.038698 | 1 | 1 RP11-550A5.2   | --     |
| ENSG00000254501 | 0.92813 | -2.038698 | 1 | 1 AP003068.9     | --     |
| ENSG00000254510 | 0.92813 | -2.038698 | 1 | 1 RP11-867G23.10 | --     |
| ENSG00000254662 | 0.92813 | -2.038698 | 1 | 1 RP11-872D17.4  | --     |
| ENSG00000254688 | 0.92813 | -2.038698 | 1 | 1 RP11-47J17.3   | --     |
| ENSG00000254740 | 0.92813 | -2.038698 | 1 | 1 RP11-334E6.3   | --     |
| ENSG00000254741 | 0.92813 | -2.038698 | 1 | 1 RP11-661A12.7  | --     |
| ENSG00000255478 | 0.92813 | -2.038698 | 1 | 1 RP11-867O8.5   | --     |
| ENSG00000255524 | 0.92813 | -2.038698 | 1 | 1 NPIPB8         | K01896 |
| ENSG00000255526 | 0.92813 | -2.038698 | 1 | 1 NEDD8-MDP1     | K17619 |
| ENSG00000255651 | 0.92813 | -2.038698 | 1 | 1 RP11-466C23.4  | --     |
| ENSG00000255753 | 0.92813 | -2.038698 | 1 | 1 RP11-22B23.2   | K18461 |
| ENSG00000255843 | 0.92813 | -2.038698 | 1 | 1 AP000593.7     | --     |
| ENSG00000256037 | 0.92813 | -2.038698 | 1 | 1 MRPL40P1       | --     |
| ENSG00000256268 | 0.92813 | -2.038698 | 1 | 1 RP11-221N13.3  | --     |
| ENSG00000257443 | 0.92813 | -2.038698 | 1 | 1 RP11-150C16.1  | --     |
| ENSG00000257509 | 0.92813 | -2.038698 | 1 | 1 RP11-762I7.4   | --     |
| ENSG00000257545 | 0.92813 | -2.038698 | 1 | 1 RP11-144F15.1  | K03021 |
| ENSG00000257752 | 0.92813 | -2.038698 | 1 | 1 RP11-474L23.3  | --     |
| ENSG00000257817 | 0.92813 | -2.038698 | 1 | 1 RP4-601P9.2    | --     |
| ENSG00000257893 | 0.92813 | -2.038698 | 1 | 1 RP11-587P21.2  | --     |
| ENSG00000257896 | 0.92813 | -2.038698 | 1 | 1 RP11-210N13.1  | --     |
| ENSG00000258082 | 0.92813 | -2.038698 | 1 | 1 RP11-443B7.3   | --     |
| ENSG00000258303 | 0.92813 | -2.038698 | 1 | 1 RP11-887P2.6   | --     |
| ENSG00000258446 | 0.92813 | -2.038698 | 1 | 1 RP11-895M11.2  | K18171 |
| ENSG00000258461 | 0.92813 | -2.038698 | 1 | 1 RP11-164J13.1  | --     |
| ENSG00000258485 | 0.92813 | -2.038698 | 1 | 1 SRMP2          | K00797 |
| ENSG00000258527 | 0.92813 | -2.038698 | 1 | 1 ASB9P1         | K10331 |
| ENSG00000258593 | 0.92813 | -2.038698 | 1 | 1 CTD-3051D23.4  | --     |
| ENSG00000258623 | 0.92813 | -2.038698 | 1 | 1 CTD-2325P2.3   | --     |
| ENSG00000258673 | 0.92813 | -2.038698 | 1 | 1 RP4-773N10.6   | --     |
| ENSG00000259120 | 0.92813 | -2.038698 | 1 | 1 SMIM6          | --     |
| ENSG00000259177 | 0.92813 | -2.038698 | 1 | 1 RP11-154B12.3  | --     |
| ENSG00000259322 | 0.92813 | -2.038698 | 1 | 1 RP11-762H8.1   | --     |
| ENSG00000259417 | 0.92813 | -2.038698 | 1 | 1 RP11-2E17.1    | --     |
| ENSG00000259422 | 0.92813 | -2.038698 | 1 | 1 RP11-593F23.1  | --     |
| ENSG00000259453 | 0.92813 | -2.038698 | 1 | 1 RP11-815J21.1  | --     |
| ENSG00000259652 | 0.92813 | -2.038698 | 1 | 1 RP11-797A18.3  | --     |
| ENSG00000260101 | 0.92813 | -2.038698 | 1 | 1 RP11-568N6.1   | --     |
| ENSG00000260179 | 0.92813 | -2.038698 | 1 | 1 RP5-902P8.12   | --     |
| ENSG00000260229 | 0.92813 | -2.038698 | 1 | 1 RP11-391L3.5   | K03767 |
| ENSG00000260339 | 0.92813 | -2.038698 | 1 | 1 HEXA-AS1       | --     |
| ENSG00000260381 | 0.92813 | -2.038698 | 1 | 1 RP11-429P3.5   | --     |
| ENSG00000260799 | 0.92813 | -2.038698 | 1 | 1 KRT8P50        | K07605 |
| ENSG00000260874 | 0.92813 | -2.038698 | 1 | 1 RP11-715J22.4  | --     |
| ENSG00000260934 | 0.92813 | -2.038698 | 1 | 1 CTA-363E6.7    | --     |
| ENSG00000261002 | 0.92813 | -2.038698 | 1 | 1 RP11-546B15.1  | --     |
| ENSG00000261079 | 0.92813 | -2.038698 | 1 | 1 RP11-252A24.3  | --     |
| ENSG00000261143 | 0.92813 | -2.038698 | 1 | 1 ADAMTS7P3      | K08622 |
| ENSG00000261229 | 0.92813 | -2.038698 | 1 | 1 RP11-38G5.4    | --     |



|                 |         |           |   |                  |        |
|-----------------|---------|-----------|---|------------------|--------|
| ENSG00000261266 | 0.92813 | -2.038698 | 1 | 1 CTD-2196E14.5  | --     |
| ENSG00000261302 | 0.92813 | -2.038698 | 1 | 1 RP11-343H19.1  | --     |
| ENSG00000261521 | 0.92813 | -2.038698 | 1 | 1 RP11-408H20.1  | --     |
| ENSG00000261529 | 0.92813 | -2.038698 | 1 | 1 RP13-487P22.1  | --     |
| ENSG00000261566 | 0.92813 | -2.038698 | 1 | 1 CTD-2144E22.6  | --     |
| ENSG00000261707 | 0.92813 | -2.038698 | 1 | 1 RP11-264M12.2  | --     |
| ENSG00000261723 | 0.92813 | -2.038698 | 1 | 1 CTD-2196E14.3  | --     |
| ENSG00000261744 | 0.92813 | -2.038698 | 1 | 1 RP11-21B21.4   | --     |
| ENSG00000261775 | 0.92813 | -2.038698 | 1 | 1 RP11-100I7.3   | --     |
| ENSG00000262172 | 0.92813 | -2.038698 | 1 | 1 CTD-2529O21.1  | --     |
| ENSG00000262304 | 0.92813 | -2.038698 | 1 | 1 SHPK           | K11214 |
| ENSG00000262362 | 0.92813 | -2.038698 | 1 | 1 LA16c-380H5.2  | --     |
| ENSG00000262636 | 0.92813 | -2.038698 | 1 | 1 CTD-3088G3.4   | K02881 |
| ENSG00000262681 | 0.92813 | -2.038698 | 1 | 1 RP11-311F12.1  | --     |
| ENSG00000263361 | 0.92813 | -2.038698 | 1 | 1 MIR378H        | --     |
| ENSG00000263764 | 0.92813 | -2.038698 | 1 | 1 SNORD43        | --     |
| ENSG00000263809 | 0.92813 | -2.038698 | 1 | 1 RP11-849F2.7   | K02898 |
| ENSG00000264057 | 0.92813 | -2.038698 | 1 | 1 RP11-583F2.1   | K11728 |
| ENSG00000264377 | 0.92813 | -2.038698 | 1 | 1 MIR4671        | --     |
| ENSG00000264424 | 0.92813 | -2.038698 | 1 | 1 MYH4           | K10352 |
| ENSG00000264475 | 0.92813 | -2.038698 | 1 | 1 RP11-76K13.3   | --     |
| ENSG00000264590 | 0.92813 | -2.038698 | 1 | 1 RN7SL512P      | --     |
| ENSG00000264653 | 0.92813 | -2.038698 | 1 | 1 MIR5194        | --     |
| ENSG00000264801 | 0.92813 | -2.038698 | 1 | 1 RP11-149I2.5   | K00772 |
| ENSG00000265137 | 0.92813 | -2.038698 | 1 | 1 MIR3192        | --     |
| ENSG00000265451 | 0.92813 | -2.038698 | 1 | 1 RP11-204L24.2  | --     |
| ENSG00000265677 | 0.92813 | -2.038698 | 1 | 1 AL137229.1     | --     |
| ENSG00000265879 | 0.92813 | -2.038698 | 1 | 1 MIR4748        | --     |
| ENSG00000265984 | 0.92813 | -2.038698 | 1 | 1 RP11-699A5.2   | --     |
| ENSG00000266289 | 0.92813 | -2.038698 | 1 | 1 RP11-1C8.6     | --     |
| ENSG00000266494 | 0.92813 | -2.038698 | 1 | 1 MIR4641        | --     |
| ENSG00000266537 | 0.92813 | -2.038698 | 1 | 1 CTD-2510F5.2   | K08694 |
| ENSG00000266644 | 0.92813 | -2.038698 | 1 | 1 RP11-927P21.2  | --     |
| ENSG00000266850 | 0.92813 | -2.038698 | 1 | 1 RP11-370A5.1   | --     |
| ENSG00000266933 | 0.92813 | -2.038698 | 1 | 1 AC005775.2     | --     |
| ENSG00000266975 | 0.92813 | -2.038698 | 1 | 1 CTC-425F1.2    | --     |
| ENSG00000267026 | 0.92813 | -2.038698 | 1 | 1 RP11-92C4.3    | --     |
| ENSG00000267183 | 0.92813 | -2.038698 | 1 | 1 AC010525.6     | --     |
| ENSG00000267228 | 0.92813 | -2.038698 | 1 | 1 IER3IP1        | --     |
| ENSG00000267345 | 0.92813 | -2.038698 | 1 | 1 CTD-2293H3.2   | --     |
| ENSG00000267462 | 0.92813 | -2.038698 | 1 | 1 RP11-866E20.3  | --     |
| ENSG00000267549 | 0.92813 | -2.038698 | 1 | 1 AC006116.17    | --     |
| ENSG00000267561 | 0.92813 | -2.038698 | 1 | 1 RP5-1052I5.2   | K02513 |
| ENSG00000267567 | 0.92813 | -2.038698 | 1 | 1 CTD-2538C1.3   | --     |
| ENSG00000267568 | 0.92813 | -2.038698 | 1 | 1 RP11-87G24.3   | --     |
| ENSG00000267666 | 0.92813 | -2.038698 | 1 | 1 AC004156.3     | --     |
| ENSG00000267677 | 0.92813 | -2.038698 | 1 | 1 RP11-27G24.1   | --     |
| ENSG00000267780 | 0.92813 | -2.038698 | 1 | 1 RP11-154H12.3  | --     |
| ENSG00000267804 | 0.92813 | -2.038698 | 1 | 1 RP11-665N17.4  | --     |
| ENSG00000268223 | 0.92813 | -2.038698 | 1 | 1 ARL14EPL       | --     |
| ENSG00000268288 | 0.92813 | -2.038698 | 1 | 1 RP11-98D18.16  | --     |
| ENSG00000268412 | 0.92813 | -2.038698 | 1 | 1 AC013449.1     | K15448 |
| ENSG00000268520 | 0.92813 | -2.038698 | 1 | 1 CTD-2616J11.10 | --     |
| ENSG00000268521 | 0.92813 | -2.038698 | 1 | 1 VN1R83P        | --     |
| ENSG00000268578 | 0.92813 | -2.038698 | 1 | 1 AL354718.1     | --     |
| ENSG00000268583 | 0.92813 | -2.038698 | 1 | 1 CTC-453G23.8   | --     |
| ENSG00000268603 | 0.92813 | -2.038698 | 1 | 1 RP11-316O14.1  | --     |
| ENSG00000269066 | 0.92813 | -2.038698 | 1 | 1 CTD-2528A14.5  | --     |

|                  |           |           |   |                  |        |
|------------------|-----------|-----------|---|------------------|--------|
| ENSG00000269489  | 0.92813   | -2.038698 | 1 | 1 RP11-98D18.17  | -      |
| ENSG00000269624  | 0.92813   | -2.038698 | 1 | 1 AL138847.1     | K09488 |
| ENSG00000269753  | 0.92813   | -2.038698 | 1 | 1 AL589739.1     | -      |
| ENSG00000269846  | 0.92813   | -2.038698 | 1 | 1 RBL1           | K04681 |
| ENSG00000269989  | 0.92813   | -2.038698 | 1 | 1 RP11-635N19.3  | -      |
| ENSG00000270024  | 0.92813   | -2.038698 | 1 | 1 C8orf44-SGK3   | K13304 |
| ENSG00000270169  | 0.92813   | -2.038698 | 1 | 1 CTC-1337H24.2  | -      |
| ENSG00000270178  | 0.92813   | -2.038698 | 1 | 1 RP11-494H4.3   | -      |
| ENSG00000270210  | 0.92813   | -2.038698 | 1 | 1 RP11-373D23.3  | -      |
| ENSG00000270269  | 0.92813   | -2.038698 | 1 | 1 RP11-697H9.4   | K09647 |
| ENSG00000270285  | 0.92813   | -2.038698 | 1 | 1 RP11-1029M24.4 | K02978 |
| ENSG00000270429  | 0.92813   | -2.038698 | 1 | 1 KNOP1P2        | -      |
| ENSG00000270720  | 0.92813   | -2.038698 | 1 | 1 RP11-84C13.2   | -      |
| ENSG00000270878  | 0.92813   | -2.038698 | 1 | 1 CTD-2302E22.5  | K00639 |
| ENSG00000270919  | 0.92813   | -2.038698 | 1 | 1 RP11-379K22.3  | -      |
| ENSG00000270986  | 0.92813   | -2.038698 | 1 | 1 RP11-123C21.2  | K10802 |
| ENSG00000270987  | 0.92813   | -2.038698 | 1 | 1 RP3-467N11.2   | -      |
| ENSG00000271151  | 0.92813   | -2.038698 | 1 | 1 RP11-394I13.2  | -      |
| ENSG00000271200  | 0.92813   | -2.038698 | 1 | 1 RP11-430G17.3  | -      |
| ENSG00000271631  | 0.92813   | -2.038698 | 1 | 1 RP11-408O19.5  | -      |
| ENSG00000271727  | 0.92813   | -2.038698 | 1 | 1 RP11-532F6.4   | -      |
| ENSG00000271748  | 0.92813   | -2.038698 | 1 | 1 MIR92B         | -      |
| ENSG00000271840  | 0.92813   | -2.038698 | 1 | 1 RP1-224A6.9    | -      |
| ENSG00000271847  | 0.92813   | -2.038698 | 1 | 1 RP4-740C4.8    | -      |
| ENSG00000271893  | 0.92813   | -2.038698 | 1 | 1 RP11-762E8.1   | -      |
| ENSG00000271913  | 0.92813   | -2.038698 | 1 | 1 RP1-111C20.4   | -      |
| ENSG00000272100  | 0.92813   | -2.038698 | 1 | 1 RP11-155O18.6  | -      |
| ENSG00000272110  | 0.92813   | -2.038698 | 1 | 1 Y_RNA          | -      |
| ENSG00000272138  | 0.92813   | -2.038698 | 1 | 1 RP11-27N21.3   | -      |
| ENSG00000272146  | 0.92813   | -2.038698 | 1 | 1 RP11-755B10.4  | -      |
| ENSG00000272192  | 0.92813   | -2.038698 | 1 | 1 CTD-2532N20.1  | -      |
| ENSG00000272375  | 0.92813   | -2.038698 | 1 | 1 RP11-51J9.6    | -      |
| ENSG00000272529  | 0.92813   | -2.038698 | 1 | 1 RP11-415F23.4  | -      |
| ENSG00000272682  | 0.92813   | -2.038698 | 1 | 1 AC004471.10    | -      |
| ENSG00000272691  | 0.92813   | -2.038698 | 1 | 1 RP11-290M5.4   | -      |
| ENSG00000272715  | 0.92813   | -2.038698 | 1 | 1 RP4-753F5.1    | -      |
| ENSG00000273035  | 0.92813   | -2.038698 | 1 | 1 RP11-449G16.1  | -      |
| ENSG00000273076  | 0.92813   | -2.038698 | 1 | 1 RP3-508I15.22  | -      |
| ENSG00000273107  | 0.92813   | -2.038698 | 1 | 1 RP11-165A20.3  | -      |
| ENSG00000273125  | 0.92813   | -2.038698 | 1 | 1 RP11-115H18.1  | -      |
| ENSG00000273240  | 0.92813   | -2.038698 | 1 | 1 RP11-455J20.3  | -      |
| ENSG00000273297  | 0.92813   | -2.038698 | 1 | 1 RP11-38M8.1    | -      |
| ENSG00000004139  | -0.907046 | -1.474542 | 1 | 1 SARM1          | -      |
| ENSG000000047597 | -0.907046 | -1.474542 | 1 | 1 XK             | K19522 |
| ENSG000000070190 | -0.907046 | -1.474542 | 1 | 1 DAPP1          | K12229 |
| ENSG000000074181 | -0.907046 | -1.474542 | 1 | 1 NOTCH3         | K02599 |
| ENSG00000102032  | -0.907046 | -1.474542 | 1 | 1 RENBP          | K01787 |
| ENSG00000105967  | -0.907046 | -1.474542 | 1 | 1 TFEC           | K15591 |
| ENSG00000117013  | -0.907046 | -1.474542 | 1 | 1 KCNQ4          | K04929 |
| ENSG00000118407  | -0.907046 | -1.474542 | 1 | 1 FILIP1         | K09228 |
| ENSG00000123901  | -0.907046 | -1.474542 | 1 | 1 GPR83          | K04210 |
| ENSG00000124493  | -0.907046 | -1.474542 | 1 | 1 GRM4           | K04607 |
| ENSG00000129214  | -0.907046 | -1.474542 | 1 | 1 SHBG           | -      |
| ENSG00000129682  | -0.907046 | -1.474542 | 1 | 1 FGF13          | K04358 |
| ENSG00000134183  | -0.907046 | -1.474542 | 1 | 1 GNAT2          | K04631 |
| ENSG00000140675  | -0.907046 | -1.474542 | 1 | 1 SLC5A2         | K14382 |
| ENSG00000142700  | -0.907046 | -1.474542 | 1 | 1 DMRTA2         | K19491 |
| ENSG00000145451  | -0.907046 | -1.474542 | 1 | 1 GLRA3          | K05195 |

|                 |           |           |   |                 |        |
|-----------------|-----------|-----------|---|-----------------|--------|
| ENSG00000155926 | -0.907046 | -1.474542 | 1 | 1 SLA           | -      |
| ENSG00000156140 | -0.907046 | -1.474542 | 1 | 1 ADAMTS3       | K08619 |
| ENSG00000160870 | -0.907046 | -1.474542 | 1 | 1 CYP3A7        | K17691 |
| ENSG00000164669 | -0.907046 | -1.474542 | 1 | 1 INTS4L1       | K13141 |
| ENSG00000167765 | -0.907046 | -1.474542 | 1 | 1 AC018755.1    | K04613 |
| ENSG00000169605 | -0.907046 | -1.474542 | 1 | 1 GKN1          | -      |
| ENSG00000171016 | -0.907046 | -1.474542 | 1 | 1 PYGO1         | K11447 |
| ENSG00000171827 | -0.907046 | -1.474542 | 1 | 1 ZNF570        | K09228 |
| ENSG00000173401 | -0.907046 | -1.474542 | 1 | 1 GLIPR1L1      | -      |
| ENSG00000176732 | -0.907046 | -1.474542 | 1 | 1 PFN4          | K05759 |
| ENSG00000180481 | -0.907046 | -1.474542 | 1 | 1 GLIPR1L2      | -      |
| ENSG00000184261 | -0.907046 | -1.474542 | 1 | 1 KCNK12        | K04921 |
| ENSG00000185304 | -0.907046 | -1.474542 | 1 | 1 RGPD2         | K12172 |
| ENSG00000186451 | -0.907046 | -1.474542 | 1 | 1 SPATA12       | -      |
| ENSG00000187753 | -0.907046 | -1.474542 | 1 | 1 C9orf153      | -      |
| ENSG00000188921 | -0.907046 | -1.474542 | 1 | 1 PTPLAD2       | K10703 |
| ENSG00000197584 | -0.907046 | -1.474542 | 1 | 1 KCNMB2        | K04938 |
| ENSG00000198286 | -0.907046 | -1.474542 | 1 | 1 CARD11        | K07367 |
| ENSG00000198366 | -0.907046 | -1.474542 | 1 | 1 HIST1H3A      | K11253 |
| ENSG00000198478 | -0.907046 | -1.474542 | 1 | 1 SH3BGR12      | -      |
| ENSG00000200550 | -0.907046 | -1.474542 | 1 | 1 RNU6-137P     | -      |
| ENSG00000202220 | -0.907046 | -1.474542 | 1 | 1 Y_RNA         | -      |
| ENSG00000202290 | -0.907046 | -1.474542 | 1 | 1 RNA5SP37      | -      |
| ENSG00000207062 | -0.907046 | -1.474542 | 1 | 1 SNORA15       | -      |
| ENSG00000211445 | -0.907046 | -1.474542 | 1 | 1 GPX3          | K00432 |
| ENSG00000212396 | -0.907046 | -1.474542 | 1 | 1 RNA5SP323     | -      |
| ENSG00000213018 | -0.907046 | -1.474542 | 1 | 1 AL590762.11   | K14396 |
| ENSG00000213144 | -0.907046 | -1.474542 | 1 | 1 RP11-64B16.2  | -      |
| ENSG00000214700 | -0.907046 | -1.474542 | 1 | 1 C12orf71      | -      |
| ENSG00000215086 | -0.907046 | -1.474542 | 1 | 1 NPM1P24       | K11276 |
| ENSG00000216901 | -0.907046 | -1.474542 | 1 | 1 AL022393.7    | -      |
| ENSG00000217236 | -0.907046 | -1.474542 | 1 | 1 SP9           | K09199 |
| ENSG00000223298 | -0.907046 | -1.474542 | 1 | 1 RNY3P8        | -      |
| ENSG00000223697 | -0.907046 | -1.474542 | 1 | 1 AF230666.2    | -      |
| ENSG00000223711 | -0.907046 | -1.474542 | 1 | 1 AC091633.3    | -      |
| ENSG00000224209 | -0.907046 | -1.474542 | 1 | 1 LINC00466     | -      |
| ENSG00000224261 | -0.907046 | -1.474542 | 1 | 1 RP11-179G5.1  | K02998 |
| ENSG00000226243 | -0.907046 | -1.474542 | 1 | 1 RPL37AP1      | K02921 |
| ENSG00000226478 | -0.907046 | -1.474542 | 1 | 1 UPF3AP1       | K14328 |
| ENSG00000227477 | -0.907046 | -1.474542 | 1 | 1 STK4-AS1      | -      |
| ENSG00000227632 | -0.907046 | -1.474542 | 1 | 1 AC018804.6    | K16307 |
| ENSG00000227811 | -0.907046 | -1.474542 | 1 | 1 FAM212B-AS1   | -      |
| ENSG00000227868 | -0.907046 | -1.474542 | 1 | 1 C1orf234      | -      |
| ENSG00000227941 | -0.907046 | -1.474542 | 1 | 1 UQCRBP2       | K00417 |
| ENSG00000228407 | -0.907046 | -1.474542 | 1 | 1 RP4-800M22.1  | K00121 |
| ENSG00000228510 | -0.907046 | -1.474542 | 1 | 1 RP11-339B21.8 | K12617 |
| ENSG00000228737 | -0.907046 | -1.474542 | 1 | 1 AC008781.7    | -      |
| ENSG00000229781 | -0.907046 | -1.474542 | 1 | 1 AC013444.1    | K15216 |
| ENSG00000229896 | -0.907046 | -1.474542 | 1 | 1 RP11-456H18.2 | -      |
| ENSG00000230499 | -0.907046 | -1.474542 | 1 | 1 AC108463.1    | -      |
| ENSG00000230606 | -0.907046 | -1.474542 | 1 | 1 AC159540.1    | -      |
| ENSG00000230870 | -0.907046 | -1.474542 | 1 | 1 FBXW11P1      | K03362 |
| ENSG00000231574 | -0.907046 | -1.474542 | 1 | 1 RP11-91K9.1   | -      |
| ENSG00000231595 | -0.907046 | -1.474542 | 1 | 1 AC005224.2    | -      |
| ENSG00000231768 | -0.907046 | -1.474542 | 1 | 1 RP5-855F14.1  | -      |
| ENSG00000231952 | -0.907046 | -1.474542 | 1 | 1 DPY19L1P2     | -      |
| ENSG00000232398 | -0.907046 | -1.474542 | 1 | 1 Tmprss11cp    | K14359 |
| ENSG00000232527 | -0.907046 | -1.474542 | 1 | 1 RP11-14N7.2   | -      |

|                 |           |           |   |                    |        |
|-----------------|-----------|-----------|---|--------------------|--------|
| ENSG00000233695 | -0.907046 | -1.474542 | 1 | 1 GAS6-AS1         | --     |
| ENSG00000234705 | -0.907046 | -1.474542 | 1 | 1 HMGA1P4          | --     |
| ENSG00000235159 | -0.907046 | -1.474542 | 1 | 1 RP6-109B7.4      | --     |
| ENSG00000235295 | -0.907046 | -1.474542 | 1 | 1 XXbac-B476C20.17 | --     |
| ENSG00000236056 | -0.907046 | -1.474542 | 1 | 1 GAPDHP14         | K00134 |
| ENSG00000237548 | -0.907046 | -1.474542 | 1 | 1 TTLL11-IT1       | --     |
| ENSG00000238317 | -0.907046 | -1.474542 | 1 | 1 SNORD11          | --     |
| ENSG00000238369 | -0.907046 | -1.474542 | 1 | 1 snoU13           | --     |
| ENSG00000240364 | -0.907046 | -1.474542 | 1 | 1 RPL31P59         | K02910 |
| ENSG00000240395 | -0.907046 | -1.474542 | 1 | 1 RPL5P23          | K02932 |
| ENSG00000242154 | -0.907046 | -1.474542 | 1 | 1 RP4-778K6.3      | --     |
| ENSG00000243284 | -0.907046 | -1.474542 | 1 | 1 VSIG8            | --     |
| ENSG00000243697 | -0.907046 | -1.474542 | 1 | 1 RP11-463O9.1     | K02936 |
| ENSG00000244218 | -0.907046 | -1.474542 | 1 | 1 RN7SL81P         | --     |
| ENSG00000244257 | -0.907046 | -1.474542 | 1 | 1 PKD1P1           | K04985 |
| ENSG00000245812 | -0.907046 | -1.474542 | 1 | 1 RP11-175K6.1     | --     |
| ENSG00000248473 | -0.907046 | -1.474542 | 1 | 1 CTC-338M12.2     | --     |
| ENSG00000248693 | -0.907046 | -1.474542 | 1 | 1 CTD-2023M8.1     | --     |
| ENSG00000249216 | -0.907046 | -1.474542 | 1 | 1 RP11-227F19.5    | --     |
| ENSG00000249319 | -0.907046 | -1.474542 | 1 | 1 AC068533.7       | K01755 |
| ENSG00000249937 | -0.907046 | -1.474542 | 1 | 1 RP11-454P21.1    | --     |
| ENSG00000250853 | -0.907046 | -1.474542 | 1 | 1 RNF138P1         | K10668 |
| ENSG00000251429 | -0.907046 | -1.474542 | 1 | 1 RP11-597D13.7    | --     |
| ENSG00000253227 | -0.907046 | -1.474542 | 1 | 1 RP11-383J24.1    | --     |
| ENSG00000253986 | -0.907046 | -1.474542 | 1 | 1 CTC-756D1.3      | --     |
| ENSG00000254373 | -0.907046 | -1.474542 | 1 | 1 RP11-34P1.2      | K00417 |
| ENSG00000254433 | -0.907046 | -1.474542 | 1 | 1 RP11-677I18.3    | --     |
| ENSG00000255458 | -0.907046 | -1.474542 | 1 | 1 RP11-539G18.2    | --     |
| ENSG00000255621 | -0.907046 | -1.474542 | 1 | 1 RP11-377D9.3     | --     |
| ENSG00000255893 | -0.907046 | -1.474542 | 1 | 1 RP11-685N10.1    | --     |
| ENSG00000256720 | -0.907046 | -1.474542 | 1 | 1 RP11-436I9.6     | K14443 |
| ENSG00000257135 | -0.907046 | -1.474542 | 1 | 1 RP11-320M2.1     | --     |
| ENSG00000257175 | -0.907046 | -1.474542 | 1 | 1 RP11-536C10.12   | K11841 |
| ENSG00000257524 | -0.907046 | -1.474542 | 1 | 1 RP11-203J24.9    | --     |
| ENSG00000258512 | -0.907046 | -1.474542 | 1 | 1 RP11-796G6.2     | --     |
| ENSG00000258646 | -0.907046 | -1.474542 | 1 | 1 RP11-950C14.3    | --     |
| ENSG00000258695 | -0.907046 | -1.474542 | 1 | 1 RP3-414A15.2     | --     |
| ENSG00000258857 | -0.907046 | -1.474542 | 1 | 1 RP11-247L20.3    | --     |
| ENSG00000259488 | -0.907046 | -1.474542 | 1 | 1 RP11-154J22.1    | --     |
| ENSG00000259727 | -0.907046 | -1.474542 | 1 | 1 RP11-1069G10.2   | --     |
| ENSG00000259762 | -0.907046 | -1.474542 | 1 | 1 RP11-158M2.4     | --     |
| ENSG00000260360 | -0.907046 | -1.474542 | 1 | 1 RP11-533E19.5    | --     |
| ENSG00000260777 | -0.907046 | -1.474542 | 1 | 1 CTD-2008P7.1     | --     |
| ENSG00000261123 | -0.907046 | -1.474542 | 1 | 1 RP11-304L19.3    | --     |
| ENSG00000261997 | -0.907046 | -1.474542 | 1 | 1 RP11-212I21.4    | --     |
| ENSG00000262152 | -0.907046 | -1.474542 | 1 | 1 LINC00514        | --     |
| ENSG00000262410 | -0.907046 | -1.474542 | 1 | 1 RP11-388C12.8    | --     |
| ENSG00000262678 | -0.907046 | -1.474542 | 1 | 1 RP5-1050D4.4     | --     |
| ENSG00000263606 | -0.907046 | -1.474542 | 1 | 1 RP11-737O24.3    | K16729 |
| ENSG00000263727 | -0.907046 | -1.474542 | 1 | 1 RP11-806L2.5     | --     |
| ENSG00000264655 | -0.907046 | -1.474542 | 1 | 1 CTD-2267D19.4    | K03767 |
| ENSG00000265010 | -0.907046 | -1.474542 | 1 | 1 RP11-661C3.2     | --     |
| ENSG00000266304 | -0.907046 | -1.474542 | 1 | 1 RP11-484N16.1    | --     |
| ENSG00000267016 | -0.907046 | -1.474542 | 1 | 1 RP11-75C10.9     | --     |
| ENSG00000267163 | -0.907046 | -1.474542 | 1 | 1 AC084219.3       | --     |
| ENSG00000267769 | -0.907046 | -1.474542 | 1 | 1 CTB-50L17.9      | --     |
| ENSG00000267778 | -0.907046 | -1.474542 | 1 | 1 AC004221.2       | --     |
| ENSG00000267798 | -0.907046 | -1.474542 | 1 | 1 RP11-333J10.3    | --     |

|                 |           |           |   |                 |        |
|-----------------|-----------|-----------|---|-----------------|--------|
| ENSG00000268366 | -0.907046 | -1.474542 | 1 | 1 CTC-492K19.4  | -      |
| ENSG00000269814 | -0.907046 | -1.474542 | 1 | 1 CTC-273B12.10 | -      |
| ENSG00000270009 | -0.907046 | -1.474542 | 1 | 1 RP1-127C7.6   | -      |
| ENSG00000271155 | -0.907046 | -1.474542 | 1 | 1 RP11-435O5.5  | -      |
| ENSG00000272161 | -0.907046 | -1.474542 | 1 | 1 RP4-713A8.1   | -      |
| ENSG00000272386 | -0.907046 | -1.474542 | 1 | 1 RP11-666A8.12 | -      |
| ENSG00000272703 | -0.907046 | -1.474542 | 1 | 1 RP11-78A19.4  | -      |
| ENSG00000272717 | -0.907046 | -1.474542 | 1 | 1 RP11-342I1.2  | -      |
| ENSG00000272869 | -0.907046 | -1.474542 | 1 | 1 CTC-487M23.8  | K03105 |
| ENSG00000272973 | -0.907046 | -1.474542 | 1 | 1 KB-1125A3.11  | -      |
| ENSG00000273001 | -0.907046 | -1.474542 | 1 | 1 RP11-118K6.3  | -      |
| ENSG00000273253 | -0.907046 | -1.474542 | 1 | 1 RP3-402G11.26 | -      |
| ENSG00000000938 | 0.603256  | -1.157594 | 1 | 1 FGR           | K08891 |
| ENSG00000064270 | 0.603256  | -1.157594 | 1 | 1 ATP2C2        | K01537 |
| ENSG00000065923 | 0.603256  | -1.157594 | 1 | 1 SLC9A7        | K12041 |
| ENSG00000068438 | 0.603256  | -1.157594 | 1 | 1 FTSJ1         | K14864 |
| ENSG00000087237 | 0.603256  | -1.157594 | 1 | 1 CETP          | K16835 |
| ENSG00000088882 | 0.603256  | -1.157594 | 1 | 1 CPXM1         | K08638 |
| ENSG00000103811 | 0.603256  | -1.157594 | 1 | 1 CTSH          | K01366 |
| ENSG00000107147 | 0.603256  | -1.157594 | 1 | 1 KCNT1         | K04946 |
| ENSG00000114757 | 0.603256  | -1.157594 | 1 | 1 PEX5L         | K13342 |
| ENSG00000123610 | 0.603256  | -1.157594 | 1 | 1 TNFAIP6       | K19018 |
| ENSG00000126353 | 0.603256  | -1.157594 | 1 | 1 CCR7          | K04182 |
| ENSG00000137474 | 0.603256  | -1.157594 | 1 | 1 MYO7A         | -      |
| ENSG00000139597 | 0.603256  | -1.157594 | 1 | 1 N4BP2L1       | -      |
| ENSG00000139914 | 0.603256  | -1.157594 | 1 | 1 FITM1         | -      |
| ENSG00000142233 | 0.603256  | -1.157594 | 1 | 1 NTN5          | -      |
| ENSG00000154438 | 0.603256  | -1.157594 | 1 | 1 ASZ1          | K18410 |
| ENSG00000168126 | 0.603256  | -1.157594 | 1 | 1 OR2W6P        | K04257 |
| ENSG00000168646 | 0.603256  | -1.157594 | 1 | 1 AXIN2         | K04385 |
| ENSG00000169894 | 0.603256  | -1.157594 | 1 | 1 MUC3A         | -      |
| ENSG00000170468 | 0.603256  | -1.157594 | 1 | 1 AC005280.1    | K16914 |
| ENSG00000170509 | 0.603256  | -1.157594 | 1 | 1 HSD17B13      | K17985 |
| ENSG00000181652 | 0.603256  | -1.157594 | 1 | 1 ATG9B         | K17907 |
| ENSG00000182511 | 0.603256  | -1.157594 | 1 | 1 FES           | K07527 |
| ENSG00000183935 | 0.603256  | -1.157594 | 1 | 1 HTR7P1        | K04163 |
| ENSG00000186314 | 0.603256  | -1.157594 | 1 | 1 PRELID2       | K01368 |
| ENSG00000205238 | 0.603256  | -1.157594 | 1 | 1 SPDYE2        | K08694 |
| ENSG00000213033 | 0.603256  | -1.157594 | 1 | 1 AURKAPS1      | K11481 |
| ENSG00000218027 | 0.603256  | -1.157594 | 1 | 1 RP11-157J24.1 | K09428 |
| ENSG00000223804 | 0.603256  | -1.157594 | 1 | 1 RP6-206I17.1  | -      |
| ENSG00000223886 | 0.603256  | -1.157594 | 1 | 1 RP11-251G23.2 | -      |
| ENSG00000224067 | 0.603256  | -1.157594 | 1 | 1 RP11-430K21.2 | -      |
| ENSG00000225472 | 0.603256  | -1.157594 | 1 | 1 RP11-120J1.1  | -      |
| ENSG00000226849 | 0.603256  | -1.157594 | 1 | 1 RP4-635E18.7  | -      |
| ENSG00000230306 | 0.603256  | -1.157594 | 1 | 1 BANF1P2       | -      |
| ENSG00000231519 | 0.603256  | -1.157594 | 1 | 1 AC007285.7    | -      |
| ENSG00000232027 | 0.603256  | -1.157594 | 1 | 1 RP11-275F13.3 | K03038 |
| ENSG00000232702 | 0.603256  | -1.157594 | 1 | 1 RP3-437C15.1  | -      |
| ENSG00000232742 | 0.603256  | -1.157594 | 1 | 1 RHOQP2        | K07194 |
| ENSG00000233396 | 0.603256  | -1.157594 | 1 | 1 RP11-458D21.1 | -      |
| ENSG00000233818 | 0.603256  | -1.157594 | 1 | 1 AP000695.4    | -      |
| ENSG00000234329 | 0.603256  | -1.157594 | 1 | 1 RP11-767N6.2  | K02936 |
| ENSG00000234902 | 0.603256  | -1.157594 | 1 | 1 AC007879.2    | -      |
| ENSG00000235023 | 0.603256  | -1.157594 | 1 | 1 AP001626.2    | -      |
| ENSG00000235527 | 0.603256  | -1.157594 | 1 | 1 RP5-1073O3.7  | -      |
| ENSG00000236423 | 0.603256  | -1.157594 | 1 | 1 LINC01134     | -      |
| ENSG00000237379 | 0.603256  | -1.157594 | 1 | 1 CBX1P3        | K11585 |

|                 |           |           |   |                 |              |
|-----------------|-----------|-----------|---|-----------------|--------------|
| ENSG00000239557 | 0.603256  | -1.157594 | 1 | 1 RP11-168J18.6 | K11584       |
| ENSG00000244476 | 0.603256  | -1.157594 | 1 | 1 ERVFRD-1      | -            |
| ENSG00000244723 | 0.603256  | -1.157594 | 1 | 1 ASLP1         | K01755       |
| ENSG00000246308 | 0.603256  | -1.157594 | 1 | 1 RP11-685M7.3  | -            |
| ENSG00000246777 | 0.603256  | -1.157594 | 1 | 1 RP11-61A14.4  | -            |
| ENSG00000248124 | 0.603256  | -1.157594 | 1 | 1 RRN3P1        | K15216       |
| ENSG00000248971 | 0.603256  | -1.157594 | 1 | 1 KRT8P46       | K07605       |
| ENSG00000249375 | 0.603256  | -1.157594 | 1 | 1 CASC11        | -            |
| ENSG00000250012 | 0.603256  | -1.157594 | 1 | 1 RP11-124N2.1  | -            |
| ENSG00000250247 | 0.603256  | -1.157594 | 1 | 1 SEPHS2P1      | K01008       |
| ENSG00000252075 | 0.603256  | -1.157594 | 1 | 1 RNU7-109P     | -            |
| ENSG00000254806 | 0.603256  | -1.157594 | 1 | 1 SYS1-DBNDD2   | -            |
| ENSG00000255236 | 0.603256  | -1.157594 | 1 | 1 CTD-2655K5.1  | -            |
| ENSG00000255337 | 0.603256  | -1.157594 | 1 | 1 RP11-315O6.1  | -            |
| ENSG00000255641 | 0.603256  | -1.157594 | 1 | 1 NKG2-E        | K06541       |
| ENSG00000255966 | 0.603256  | -1.157594 | 1 | 1 RP5-940J5.3   | -            |
| ENSG00000257531 | 0.603256  | -1.157594 | 1 | 1 RP3-405J10.2  | K02976       |
| ENSG00000260007 | 0.603256  | -1.157594 | 1 | 1 RP11-315D16.2 | K12359       |
| ENSG00000260572 | 0.603256  | -1.157594 | 1 | 1 RP11-16N11.2  | -            |
| ENSG00000260743 | 0.603256  | -1.157594 | 1 | 1 RP11-255C15.3 | -            |
| ENSG00000260910 | 0.603256  | -1.157594 | 1 | 1 LINC00565     | -            |
| ENSG00000260992 | 0.603256  | -1.157594 | 1 | 1 DOCK9-AS2     | -            |
| ENSG00000261335 | 0.603256  | -1.157594 | 1 | 1 RP11-318A15.2 | -            |
| ENSG00000262877 | 0.603256  | -1.157594 | 1 | 1 RP11-1055B8.4 | -            |
| ENSG00000263766 | 0.603256  | -1.157594 | 1 | 1 RP11-580I16.2 | -            |
| ENSG00000267759 | 0.603256  | -1.157594 | 1 | 1 CTB-25B13.13  | -            |
| ENSG00000268059 | 0.603256  | -1.157594 | 1 | 1 AL441883.1    | -            |
| ENSG00000271983 | 0.603256  | -1.157594 | 1 | 1 RP11-28H5.2   | -            |
| ENSG00000272156 | 0.603256  | -1.157594 | 1 | 1 RP11-477N3.1  | -            |
| ENSG00000100985 | -0.528106 | -1.058472 | 1 | 1 MMP9          | K01403       |
| ENSG00000101298 | -0.528106 | -1.058472 | 1 | 1 SNPH          | -            |
| ENSG00000108387 | -0.528106 | -1.058472 | 1 | 1               | 4-Sep K16943 |
| ENSG00000111913 | -0.528106 | -1.058472 | 1 | 1 FAM65B        | K01940       |
| ENSG00000116833 | -0.528106 | -1.058472 | 1 | 1 NR5A2         | K08027       |
| ENSG00000130643 | -0.528106 | -1.058472 | 1 | 1 CALY          | K15493       |
| ENSG00000133216 | -0.528106 | -1.058472 | 1 | 1 EPHB2         | K05111       |
| ENSG00000142513 | -0.528106 | -1.058472 | 1 | 1 ACPT          | K19284       |
| ENSG00000150316 | -0.528106 | -1.058472 | 1 | 1 CWC15         | K12863       |
| ENSG00000157388 | -0.528106 | -1.058472 | 1 | 1 CACNA1D       | K04851       |
| ENSG00000157873 | -0.528106 | -1.058472 | 1 | 1 TNFRSF14      | K05152       |
| ENSG00000163449 | -0.528106 | -1.058472 | 1 | 1 TMEM169       | -            |
| ENSG00000166220 | -0.528106 | -1.058472 | 1 | 1 TBATA         | -            |
| ENSG00000166963 | -0.528106 | -1.058472 | 1 | 1 MAP1A         | K10429       |
| ENSG00000179593 | -0.528106 | -1.058472 | 1 | 1 ALOX15B       | K08022       |
| ENSG00000182687 | -0.528106 | -1.058472 | 1 | 1 GALR2         | K04231       |
| ENSG00000183134 | -0.528106 | -1.058472 | 1 | 1 PTGDR2        | K06715       |
| ENSG00000183977 | -0.528106 | -1.058472 | 1 | 1 PP2D1         | -            |
| ENSG00000197646 | -0.528106 | -1.058472 | 1 | 1 PDCD1LG2      | K06708       |
| ENSG00000200714 | -0.528106 | -1.058472 | 1 | 1 Y_RNA         | -            |
| ENSG00000205277 | -0.528106 | -1.058472 | 1 | 1 MUC12         | -            |
| ENSG00000205683 | -0.528106 | -1.058472 | 1 | 1 DPF3          | -            |
| ENSG00000206920 | -0.528106 | -1.058472 | 1 | 1 RNY1P6        | -            |
| ENSG00000215270 | -0.528106 | -1.058472 | 1 | 1 LA16c-60H5.7  | K11518       |
| ENSG00000217733 | -0.528106 | -1.058472 | 1 | 1 CCT7P1        | K09499       |
| ENSG00000220685 | -0.528106 | -1.058472 | 1 | 1 RP11-530A18.1 | K17653       |
| ENSG00000220875 | -0.528106 | -1.058472 | 1 | 1 HIST1H3PS1    | K11253       |
| ENSG00000226440 | -0.528106 | -1.058472 | 1 | 1 RP11-506B6.6  | -            |
| ENSG00000226754 | -0.528106 | -1.058472 | 1 | 1 RP5-1024G6.5  | -            |

|                 |           |           |   |                  |               |
|-----------------|-----------|-----------|---|------------------|---------------|
| ENSG00000227070 | -0.528106 | -1.058472 | 1 | 1 RP11-191G24.1  | —             |
| ENSG00000227666 | -0.528106 | -1.058472 | 1 | 1 CYCSP24        | K08738        |
| ENSG00000228044 | -0.528106 | -1.058472 | 1 | 1 RP4-781K5.4    | —             |
| ENSG00000228192 | -0.528106 | -1.058472 | 1 | 1 RP11-342M1.3   | —             |
| ENSG00000231784 | -0.528106 | -1.058472 | 1 | 1 DBIL5P         | —             |
| ENSG00000234369 | -0.528106 | -1.058472 | 1 | 1 TATDN1P1       | K03424        |
| ENSG00000235831 | -0.528106 | -1.058472 | 1 | 1 BHLHE40-AS1    | —             |
| ENSG00000236123 | -0.528106 | -1.058472 | 1 | 1 CEACAMP11      | K06500        |
| ENSG00000238336 | -0.528106 | -1.058472 | 1 | 1 snoU13         | —             |
| ENSG00000244256 | -0.528106 | -1.058472 | 1 | 1 RN7SL130P      | —             |
| ENSG00000248607 | -0.528106 | -1.058472 | 1 | 1 RP11-158I23.1  | —             |
| ENSG00000251143 | -0.528106 | -1.058472 | 1 | 1 RP11-849H4.4   | —             |
| ENSG00000251161 | -0.528106 | -1.058472 | 1 | 1 RP11-540O11.1  | —             |
| ENSG00000253660 | -0.528106 | -1.058472 | 1 | 1 CTC-353G13.1   | —             |
| ENSG00000253819 | -0.528106 | -1.058472 | 1 | 1 LINC01151      | —             |
| ENSG00000253966 | -0.528106 | -1.058472 | 1 | 1 CTC-455F18.3   | K10391        |
| ENSG00000257222 | -0.528106 | -1.058472 | 1 | 1 RP11-554E23.4  | —             |
| ENSG00000257613 | -0.528106 | -1.058472 | 1 | 1 RP11-320P7.1   | —             |
| ENSG00000258515 | -0.528106 | -1.058472 | 1 | 1 RP11-203M5.7   | —             |
| ENSG00000258811 | -0.528106 | -1.058472 | 1 | 1 CTD-3051D23.1  | —             |
| ENSG00000259238 | -0.528106 | -1.058472 | 1 | 1 RP11-361D15.2  | —             |
| ENSG00000261216 | -0.528106 | -1.058472 | 1 | 1 RP11-166B2.5   | —             |
| ENSG00000261490 | -0.528106 | -1.058472 | 1 | 1 RP11-448G15.3  | —             |
| ENSG00000265112 | -0.528106 | -1.058472 | 1 | 1 MIR3153        | —             |
| ENSG00000267219 | -0.528106 | -1.058472 | 1 | 1 AC010504.2     | —             |
| ENSG00000267595 | -0.528106 | -1.058472 | 1 | 1 RP11-242D8.2   | K10605        |
| ENSG00000270020 | -0.528106 | -1.058472 | 1 | 1 RP11-463O9.9   | —             |
| ENSG00000271032 | -0.528106 | -1.058472 | 1 | 1 CTD-2527I21.14 | —             |
| ENSG00000271321 | -0.528106 | -1.058472 | 1 | 1 CTAGE6         | —             |
| ENSG00000272148 | -0.528106 | -1.058472 | 1 | 1 RP11-195B17.1  | —             |
| ENSG00000272428 | -0.528106 | -1.058472 | 1 | 1 RP11-704J17.5  | —             |
| ENSG00000272432 | -0.528106 | -1.058472 | 1 | 1 RP3-465N24.6   | —             |
| ENSG00000272791 | -0.528106 | -1.058472 | 1 | 1 RP11-464F9.22  | —             |
| ENSG00000273081 | -0.528106 | -1.058472 | 1 | 1 RP4-813F11.4   | —             |
| ENSG00000013297 | -0.51128  | -1.637813 | 1 | 1 CLDN11         | K06087        |
| ENSG00000044524 | -0.51128  | -1.637813 | 1 | 1 EPHA3          | K05104        |
| ENSG00000064393 | -0.51128  | -1.637813 | 1 | 1 HIPK2          | K08826        |
| ENSG00000067177 | -0.51128  | -1.637813 | 1 | 1 PHKA1          | K07190        |
| ENSG00000069712 | -0.51128  | -1.637813 | 1 | 1 KIAA1107       | K10480        |
| ENSG00000080007 | -0.51128  | -1.637813 | 1 | 1 DDX43          | K17043        |
| ENSG00000101353 | -0.51128  | -1.637813 | 1 | 1 MROH8          | K14443        |
| ENSG00000103313 | -0.51128  | -1.637813 | 1 | 1 MEFV           | K12803        |
| ENSG00000105255 | -0.51128  | -1.637813 | 1 | 1 FSD1           | —             |
| ENSG00000107165 | -0.51128  | -1.637813 | 1 | 1 TYRP1          | K00506        |
| ENSG00000111780 | -0.51128  | -1.637813 | 1 | 1 AL021546.6     | K02435        |
| ENSG00000117245 | -0.51128  | -1.637813 | 1 | 1 KIF17          | K10394        |
| ENSG00000122733 | -0.51128  | -1.637813 | 1 | 1 KIAA1045       | —             |
| ENSG00000124772 | -0.51128  | -1.637813 | 1 | 1 CPNE5          | —             |
| ENSG00000128652 | -0.51128  | -1.637813 | 1 | 1 HOXD3          | K09303        |
| ENSG00000129744 | -0.51128  | -1.637813 | 1 | 1 ART1           | K06716        |
| ENSG00000131152 | -0.51128  | -1.637813 | 1 | 1 RP11-178L8.4   | K10308        |
| ENSG00000139200 | -0.51128  | -1.637813 | 1 | 1 PIANP          | —             |
| ENSG00000139540 | -0.51128  | -1.637813 | 1 | 1 SLC39A5        | —             |
| ENSG00000140623 | -0.51128  | -1.637813 | 1 | 1                | 12-Sep K16938 |
| ENSG00000142319 | -0.51128  | -1.637813 | 1 | 1 SLC6A3         | K05036        |
| ENSG00000142611 | -0.51128  | -1.637813 | 1 | 1 PRDM16         | K04462        |
| ENSG00000148848 | -0.51128  | -1.637813 | 1 | 1 ADAM12         | K06835        |
| ENSG00000151655 | -0.51128  | -1.637813 | 1 | 1 ITIH2          | K19015        |

|                 |          |           |   |                 |        |
|-----------------|----------|-----------|---|-----------------|--------|
| ENSG00000153237 | -0.51128 | -1.637813 | 1 | 1 CCDC148       | -      |
| ENSG00000155761 | -0.51128 | -1.637813 | 1 | 1 SPAG17        | -      |
| ENSG00000157168 | -0.51128 | -1.637813 | 1 | 1 NRG1          | K05455 |
| ENSG00000159374 | -0.51128 | -1.637813 | 1 | 1 M1AP          | -      |
| ENSG00000161149 | -0.51128 | -1.637813 | 1 | 1 TUBA3FP       | K07374 |
| ENSG00000162676 | -0.51128 | -1.637813 | 1 | 1 GFII          | K09223 |
| ENSG00000163239 | -0.51128 | -1.637813 | 1 | 1 TDRD10        | -      |
| ENSG00000163749 | -0.51128 | -1.637813 | 1 | 1 CCDC158       | -      |
| ENSG00000163884 | -0.51128 | -1.637813 | 1 | 1 KLF15         | K09210 |
| ENSG00000163931 | -0.51128 | -1.637813 | 1 | 1 TKT           | K00615 |
| ENSG00000166501 | -0.51128 | -1.637813 | 1 | 1 PRKCB         | K02677 |
| ENSG00000168350 | -0.51128 | -1.637813 | 1 | 1 DEGS2         | K04712 |
| ENSG00000168589 | -0.51128 | -1.637813 | 1 | 1 DYNLRB2       | K10419 |
| ENSG00000169903 | -0.51128 | -1.637813 | 1 | 1 TM4SF4        | -      |
| ENSG00000170667 | -0.51128 | -1.637813 | 1 | 1 RASA4B        | K17630 |
| ENSG00000171401 | -0.51128 | -1.637813 | 1 | 1 KRT13         | K07604 |
| ENSG00000171649 | -0.51128 | -1.637813 | 1 | 1 ZIK1          | K09228 |
| ENSG00000172936 | -0.51128 | -1.637813 | 1 | 1 MYD88         | K04729 |
| ENSG00000173088 | -0.51128 | -1.637813 | 1 | 1 C10orf131     | K19352 |
| ENSG00000175077 | -0.51128 | -1.637813 | 1 | 1 RTP1          | -      |
| ENSG00000175463 | -0.51128 | -1.637813 | 1 | 1 TBC1D10C      | -      |
| ENSG00000177191 | -0.51128 | -1.637813 | 1 | 1 B3GNT8        | K09665 |
| ENSG00000178623 | -0.51128 | -1.637813 | 1 | 1 GPR35         | K04276 |
| ENSG00000179580 | -0.51128 | -1.637813 | 1 | 1 RNF151        | K11981 |
| ENSG00000180787 | -0.51128 | -1.637813 | 1 | 1 ZFP3          | K09228 |
| ENSG00000182533 | -0.51128 | -1.637813 | 1 | 1 CAV3          | K12959 |
| ENSG00000183785 | -0.51128 | -1.637813 | 1 | 1 TUBA8         | K07374 |
| ENSG00000184324 | -0.51128 | -1.637813 | 1 | 1 CSAG2         | -      |
| ENSG00000184599 | -0.51128 | -1.637813 | 1 | 1 FAM19A3       | -      |
| ENSG00000184697 | -0.51128 | -1.637813 | 1 | 1 CLDN6         | K06087 |
| ENSG00000185615 | -0.51128 | -1.637813 | 1 | 1 PDIA2         | K09581 |
| ENSG00000185837 | -0.51128 | -1.637813 | 1 | 1 CECR5-AS1     | -      |
| ENSG00000188763 | -0.51128 | -1.637813 | 1 | 1 FZD9          | K02842 |
| ENSG00000188833 | -0.51128 | -1.637813 | 1 | 1 ENTPD8        | K01510 |
| ENSG00000188859 | -0.51128 | -1.637813 | 1 | 1 FAM78B        | -      |
| ENSG00000189337 | -0.51128 | -1.637813 | 1 | 1 KAZN          | -      |
| ENSG00000196420 | -0.51128 | -1.637813 | 1 | 1 S100A5        | -      |
| ENSG00000196860 | -0.51128 | -1.637813 | 1 | 1 TOMM20L       | K17770 |
| ENSG00000198829 | -0.51128 | -1.637813 | 1 | 1 SUCNR1        | K10042 |
| ENSG00000200169 | -0.51128 | -1.637813 | 1 | 1 RNU5D-1       | -      |
| ENSG00000200769 | -0.51128 | -1.637813 | 1 | 1 Y_RNA         | -      |
| ENSG00000201388 | -0.51128 | -1.637813 | 1 | 1 SNORA68       | -      |
| ENSG00000203327 | -0.51128 | -1.637813 | 1 | 1 AC012358.7    | -      |
| ENSG00000203581 | -0.51128 | -1.637813 | 1 | 1 OR1F2P        | K04257 |
| ENSG00000204310 | -0.51128 | -1.637813 | 1 | 1 AGPAT1        | K13509 |
| ENSG00000205693 | -0.51128 | -1.637813 | 1 | 1 MANSC4        | -      |
| ENSG00000206658 | -0.51128 | -1.637813 | 1 | 1 RNU6-1039P    | -      |
| ENSG00000212452 | -0.51128 | -1.637813 | 1 | 1 SNORD69       | -      |
| ENSG00000212541 | -0.51128 | -1.637813 | 1 | 1 RNU6-510P     | -      |
| ENSG00000212993 | -0.51128 | -1.637813 | 1 | 1 POU5F1B       | K09367 |
| ENSG00000213994 | -0.51128 | -1.637813 | 1 | 1 RP11-414H17.5 | -      |
| ENSG00000214108 | -0.51128 | -1.637813 | 1 | 1 TPT1P5        | -      |
| ENSG00000214146 | -0.51128 | -1.637813 | 1 | 1 RP11-699L21.1 | -      |
| ENSG00000214237 | -0.51128 | -1.637813 | 1 | 1 FAM188B2      | K08742 |
| ENSG00000215018 | -0.51128 | -1.637813 | 1 | 1 COL28A1       | -      |
| ENSG00000215548 | -0.51128 | -1.637813 | 1 | 1 RP11-764K9.4  | K13122 |
| ENSG00000215795 | -0.51128 | -1.637813 | 1 | 1 RP11-488L18.3 | K13342 |
| ENSG00000218996 | -0.51128 | -1.637813 | 1 | 1 RP1-99E18.2   | K07945 |



|                 |          |           |   |                 |        |
|-----------------|----------|-----------|---|-----------------|--------|
| ENSG00000219507 | -0.51128 | -1.637813 | 1 | 1 FTH1P8        | K00522 |
| ENSG00000220793 | -0.51128 | -1.637813 | 1 | 1 RPL21P119     | K02889 |
| ENSG00000221743 | -0.51128 | -1.637813 | 1 | 1 Z95152.1      | --     |
| ENSG00000222046 | -0.51128 | -1.637813 | 1 | 1 DCDC2B        | --     |
| ENSG00000223254 | -0.51128 | -1.637813 | 1 | 1 Y_RNA         | --     |
| ENSG00000223313 | -0.51128 | -1.637813 | 1 | 1 RNU6-516P     | --     |
| ENSG00000223461 | -0.51128 | -1.637813 | 1 | 1 AC004471.9    | --     |
| ENSG00000223519 | -0.51128 | -1.637813 | 1 | 1 KIF28P        | --     |
| ENSG00000223901 | -0.51128 | -1.637813 | 1 | 1 AP001469.5    | --     |
| ENSG00000224043 | -0.51128 | -1.637813 | 1 | 1 CCNT2-AS1     | --     |
| ENSG00000224093 | -0.51128 | -1.637813 | 1 | 1 RP5-1033H22.2 | --     |
| ENSG00000224468 | -0.51128 | -1.637813 | 1 | 1 RP11-181K3.4  | --     |
| ENSG00000224490 | -0.51128 | -1.637813 | 1 | 1 TTC21B-AS1    | --     |
| ENSG00000224790 | -0.51128 | -1.637813 | 1 | 1 AP000704.5    | --     |
| ENSG00000224855 | -0.51128 | -1.637813 | 1 | 1 OPA1-AS1      | --     |
| ENSG00000225206 | -0.51128 | -1.637813 | 1 | 1 MIR137HG      | --     |
| ENSG00000225385 | -0.51128 | -1.637813 | 1 | 1 RP11-350E12.4 | --     |
| ENSG00000225447 | -0.51128 | -1.637813 | 1 | 1 RPS15AP10     | K02957 |
| ENSG00000225826 | -0.51128 | -1.637813 | 1 | 1 LINC00626     | --     |
| ENSG00000226055 | -0.51128 | -1.637813 | 1 | 1 PAICSP1       | K01587 |
| ENSG00000226203 | -0.51128 | -1.637813 | 1 | 1 RP4-760C5.5   | --     |
| ENSG00000226472 | -0.51128 | -1.637813 | 1 | 1 RP11-551L14.4 | --     |
| ENSG00000226544 | -0.51128 | -1.637813 | 1 | 1 RPL7P22       | --     |
| ENSG00000226548 | -0.51128 | -1.637813 | 1 | 1 AC016722.3    | --     |
| ENSG00000226690 | -0.51128 | -1.637813 | 1 | 1 AC005281.1    | --     |
| ENSG00000227071 | -0.51128 | -1.637813 | 1 | 1 RP11-4E23.2   | --     |
| ENSG00000227210 | -0.51128 | -1.637813 | 1 | 1 AC079145.4    | --     |
| ENSG00000228502 | -0.51128 | -1.637813 | 1 | 1 EEF1A1P11     | K03231 |
| ENSG00000228554 | -0.51128 | -1.637813 | 1 | 1 AC004837.5    | --     |
| ENSG00000228701 | -0.51128 | -1.637813 | 1 | 1 TNKS2-AS1     | --     |
| ENSG00000228824 | -0.51128 | -1.637813 | 1 | 1 MIR4500HG     | --     |
| ENSG00000229401 | -0.51128 | -1.637813 | 1 | 1 RP1-290I10.7  | --     |
| ENSG00000229989 | -0.51128 | -1.637813 | 1 | 1 MIR181A1HG    | --     |
| ENSG00000230069 | -0.51128 | -1.637813 | 1 | 1 LRRC37A15P    | K01192 |
| ENSG00000230280 | -0.51128 | -1.637813 | 1 | 1 HNRNPA1P59    | K12741 |
| ENSG00000230637 | -0.51128 | -1.637813 | 1 | 1 CTA-246H3.8   | --     |
| ENSG00000230724 | -0.51128 | -1.637813 | 1 | 1 LINC01001     | --     |
| ENSG00000231530 | -0.51128 | -1.637813 | 1 | 1 RP11-187A9.3  | --     |
| ENSG00000231587 | -0.51128 | -1.637813 | 1 | 1 SNORD62B      | --     |
| ENSG00000231856 | -0.51128 | -1.637813 | 1 | 1 RP11-327P2.5  | --     |
| ENSG00000232727 | -0.51128 | -1.637813 | 1 | 1 YWHAEP1       | K06630 |
| ENSG00000233170 | -0.51128 | -1.637813 | 1 | 1 RP11-863K10.4 | --     |
| ENSG00000233626 | -0.51128 | -1.637813 | 1 | 1 RP11-565J7.1  | K09579 |
| ENSG00000234183 | -0.51128 | -1.637813 | 1 | 1 AC004854.4    | --     |
| ENSG00000234754 | -0.51128 | -1.637813 | 1 | 1 RP11-421L10.1 | --     |
| ENSG00000235121 | -0.51128 | -1.637813 | 1 | 1 RP11-90L20.2  | --     |
| ENSG00000236269 | -0.51128 | -1.637813 | 1 | 1 ENO1-IT1      | --     |
| ENSG00000236409 | -0.51128 | -1.637813 | 1 | 1 NRADDP        | --     |
| ENSG00000236641 | -0.51128 | -1.637813 | 1 | 1 CTA-221G9.7   | --     |
| ENSG00000236937 | -0.51128 | -1.637813 | 1 | 1 PTGES3P4      | K15730 |
| ENSG00000236991 | -0.51128 | -1.637813 | 1 | 1 EDRF1-AS1     | --     |
| ENSG00000237263 | -0.51128 | -1.637813 | 1 | 1 MAPK6PS3      | K06855 |
| ENSG00000237268 | -0.51128 | -1.637813 | 1 | 1 RP13-492C18.2 | K17299 |
| ENSG00000239280 | -0.51128 | -1.637813 | 1 | 1 RP11-271C24.3 | K09699 |
| ENSG00000239405 | -0.51128 | -1.637813 | 1 | 1 TMED10P2      | --     |
| ENSG00000241255 | -0.51128 | -1.637813 | 1 | 1 RP1-89D4.1    | K02974 |
| ENSG00000241458 | -0.51128 | -1.637813 | 1 | 1 RPL7P19       | K02937 |
| ENSG00000243404 | -0.51128 | -1.637813 | 1 | 1 RPL35AP32     | K02917 |

|                 |          |           |   |                 |        |
|-----------------|----------|-----------|---|-----------------|--------|
| ENSG00000243849 | -0.51128 | -1.637813 | 1 | 1 WDR52-AS1     | --     |
| ENSG00000244926 | -0.51128 | -1.637813 | 1 | 1 ALKBH3-AS1    | --     |
| ENSG00000246430 | -0.51128 | -1.637813 | 1 | 1 LINC00968     | --     |
| ENSG00000247345 | -0.51128 | -1.637813 | 1 | 1 RP11-266N13.2 | --     |
| ENSG00000248206 | -0.51128 | -1.637813 | 1 | 1 RP11-739P1.2  | --     |
| ENSG00000248898 | -0.51128 | -1.637813 | 1 | 1 CTD-2288O8.1  | --     |
| ENSG00000249055 | -0.51128 | -1.637813 | 1 | 1 TBCAP3        | K17292 |
| ENSG00000249379 | -0.51128 | -1.637813 | 1 | 1 RP1-27K12.4   | --     |
| ENSG00000249650 | -0.51128 | -1.637813 | 1 | 1 RP11-310P5.1  | --     |
| ENSG00000250033 | -0.51128 | -1.637813 | 1 | 1 SLC7A11-AS1   | --     |
| ENSG00000250362 | -0.51128 | -1.637813 | 1 | 1 AC008592.5    | --     |
| ENSG00000250492 | -0.51128 | -1.637813 | 1 | 1 INTS6P1       | K13143 |
| ENSG00000250656 | -0.51128 | -1.637813 | 1 | 1 ST3GAL1P1     | K00780 |
| ENSG00000250697 | -0.51128 | -1.637813 | 1 | 1 CTD-2066L21.3 | --     |
| ENSG00000251323 | -0.51128 | -1.637813 | 1 | 1 RP11-452H21.4 | --     |
| ENSG00000251963 | -0.51128 | -1.637813 | 1 | 1 AC090420.1    | --     |
| ENSG00000252147 | -0.51128 | -1.637813 | 1 | 1 Y_RNA         | --     |
| ENSG00000252202 | -0.51128 | -1.637813 | 1 | 1 Y_RNA         | --     |
| ENSG00000252245 | -0.51128 | -1.637813 | 1 | 1 RNU6-736P     | --     |
| ENSG00000253203 | -0.51128 | -1.637813 | 1 | 1 GUSBP3        | K01195 |
| ENSG00000253258 | -0.51128 | -1.637813 | 1 | 1 RP11-539E17.5 | --     |
| ENSG00000253476 | -0.51128 | -1.637813 | 1 | 1 RP11-395I14.2 | --     |
| ENSG00000254162 | -0.51128 | -1.637813 | 1 | 1 RP11-48B3.3   | --     |
| ENSG00000254286 | -0.51128 | -1.637813 | 1 | 1 RP11-89K10.1  | --     |
| ENSG00000254509 | -0.51128 | -1.637813 | 1 | 1 RP11-677M14.6 | K06787 |
| ENSG00000254731 | -0.51128 | -1.637813 | 1 | 1 CTD-2005H7.1  | --     |
| ENSG00000255008 | -0.51128 | -1.637813 | 1 | 1 AP000442.4    | --     |
| ENSG00000257097 | -0.51128 | -1.637813 | 1 | 1 RP11-450K4.1  | --     |
| ENSG00000257230 | -0.51128 | -1.637813 | 1 | 1 RP11-272B17.2 | --     |
| ENSG00000258092 | -0.51128 | -1.637813 | 1 | 1 RP4-816N1.7   | --     |
| ENSG00000258096 | -0.51128 | -1.637813 | 1 | 1 RP11-474P2.2  | --     |
| ENSG00000258334 | -0.51128 | -1.637813 | 1 | 1 RP11-161H23.9 | --     |
| ENSG00000258427 | -0.51128 | -1.637813 | 1 | 1 RBM8B         | K12876 |
| ENSG00000259129 | -0.51128 | -1.637813 | 1 | 1 LINC00648     | --     |
| ENSG00000259265 | -0.51128 | -1.637813 | 1 | 1 RP11-809H16.4 | --     |
| ENSG00000259295 | -0.51128 | -1.637813 | 1 | 1 CSPG4P12      | K08115 |
| ENSG00000259314 | -0.51128 | -1.637813 | 1 | 1 CTD-3065B20.3 | --     |
| ENSG00000259521 | -0.51128 | -1.637813 | 1 | 1 RP11-540O11.4 | --     |
| ENSG00000259630 | -0.51128 | -1.637813 | 1 | 1 CTD-2262B20.1 | K08754 |
| ENSG00000259736 | -0.51128 | -1.637813 | 1 | 1 RP11-387D10.2 | --     |
| ENSG00000260088 | -0.51128 | -1.637813 | 1 | 1 RP11-92G12.3  | --     |
| ENSG00000260272 | -0.51128 | -1.637813 | 1 | 1 RP11-20I23.1  | K02155 |
| ENSG00000260366 | -0.51128 | -1.637813 | 1 | 1 CTD-2639E6.4  | --     |
| ENSG00000260467 | -0.51128 | -1.637813 | 1 | 1 RP11-405F3.4  | --     |
| ENSG00000260911 | -0.51128 | -1.637813 | 1 | 1 RP11-196G11.2 | --     |
| ENSG00000260924 | -0.51128 | -1.637813 | 1 | 1 AC004463.6    | --     |
| ENSG00000260927 | -0.51128 | -1.637813 | 1 | 1 RP11-459F6.3  | --     |
| ENSG00000261173 | -0.51128 | -1.637813 | 1 | 1 RP11-169E6.1  | --     |
| ENSG00000261886 | -0.51128 | -1.637813 | 1 | 1 RP11-63A1.1   | --     |
| ENSG00000261949 | -0.51128 | -1.637813 | 1 | 1 GFY           | --     |
| ENSG00000262006 | -0.51128 | -1.637813 | 1 | 1 RP11-700H6.4  | --     |
| ENSG00000262202 | -0.51128 | -1.637813 | 1 | 1 SNORD3D       | --     |
| ENSG00000262979 | -0.51128 | -1.637813 | 1 | 1 CTD-2047H16.2 | --     |
| ENSG00000265656 | -0.51128 | -1.637813 | 1 | 1 RP11-13N13.6  | --     |
| ENSG00000266920 | -0.51128 | -1.637813 | 1 | 1 ACTBP9        | K05692 |
| ENSG00000267059 | -0.51128 | -1.637813 | 1 | 1 UQCR11        | K11591 |
| ENSG00000267715 | -0.51128 | -1.637813 | 1 | 1 CTB-25B13.6   | --     |
| ENSG00000267750 | -0.51128 | -1.637813 | 1 | 1 AC003102.3    | --     |

|                 |          |           |   |                 |        |
|-----------------|----------|-----------|---|-----------------|--------|
| ENSG00000267758 | -0.51128 | -1.637813 | 1 | 1 RP11-358B23.5 | -      |
| ENSG00000267857 | -0.51128 | -1.637813 | 1 | 1 PRED58        | -      |
| ENSG00000268211 | -0.51128 | -1.637813 | 1 | 1 AL359091.2    | K17985 |
| ENSG00000268518 | -0.51128 | -1.637813 | 1 | 1 CTD-2545M3.8  | -      |
| ENSG00000268632 | -0.51128 | -1.637813 | 1 | 1 AC073657.1    | K18047 |
| ENSG00000269054 | -0.51128 | -1.637813 | 1 | 1 CTD-2619J13.3 | -      |
| ENSG00000269337 | -0.51128 | -1.637813 | 1 | 1 AL591479.1    | -      |
| ENSG00000269656 | -0.51128 | -1.637813 | 1 | 1 CTD-2571L23.6 | -      |
| ENSG00000269984 | -0.51128 | -1.637813 | 1 | 1 RP11-362K14.5 | -      |
| ENSG00000269994 | -0.51128 | -1.637813 | 1 | 1 RP11-276H19.2 | -      |
| ENSG00000270030 | -0.51128 | -1.637813 | 1 | 1 RP11-326C3.13 | -      |
| ENSG00000270062 | -0.51128 | -1.637813 | 1 | 1 RP11-248J18.3 | -      |
| ENSG00000270108 | -0.51128 | -1.637813 | 1 | 1 RP11-73M18.6  | -      |
| ENSG00000270681 | -0.51128 | -1.637813 | 1 | 1 RP11-372K14.2 | -      |
| ENSG00000271092 | -0.51128 | -1.637813 | 1 | 1 TMEM56-RWDD3  | -      |
| ENSG00000271427 | -0.51128 | -1.637813 | 1 | 1 RP11-188D8.1  | -      |
| ENSG00000271664 | -0.51128 | -1.637813 | 1 | 1 RP4-800G7.3   | K19539 |
| ENSG00000271984 | -0.51128 | -1.637813 | 1 | 1 RP3-337O18.9  | -      |
| ENSG00000272008 | -0.51128 | -1.637813 | 1 | 1 RP11-393I2.4  | -      |
| ENSG00000272053 | -0.51128 | -1.637813 | 1 | 1 RP11-367G6.3  | -      |
| ENSG00000272056 | -0.51128 | -1.637813 | 1 | 1 RP11-503P10.1 | -      |
| ENSG00000272128 | -0.51128 | -1.637813 | 1 | 1 KB-1836B5.4   | -      |
| ENSG00000272130 | -0.51128 | -1.637813 | 1 | 1 RP11-360I2.1  | -      |
| ENSG00000272189 | -0.51128 | -1.637813 | 1 | 1 RP3-325F22.5  | -      |
| ENSG00000272275 | -0.51128 | -1.637813 | 1 | 1 RP11-791G15.2 | -      |
| ENSG00000272416 | -0.51128 | -1.637813 | 1 | 1 CTD-2081C10.7 | -      |
| ENSG00000272498 | -0.51128 | -1.637813 | 1 | 1 RP11-415F23.3 | -      |
| ENSG00000272567 | -0.51128 | -1.637813 | 1 | 1 RP11-73K9.3   | -      |
| ENSG00000272732 | -0.51128 | -1.637813 | 1 | 1 RP5-1159O4.2  | -      |
| ENSG00000272799 | -0.51128 | -1.637813 | 1 | 1 RP11-474N24.6 | -      |
| ENSG00000273058 | -0.51128 | -1.637813 | 1 | 1 RP11-385F5.5  | -      |
| ENSG00000273061 | -0.51128 | -1.637813 | 1 | 1 RP11-6J24.6   | -      |
| ENSG00000273080 | -0.51128 | -1.637813 | 1 | 1 RP11-301O19.1 | -      |
| ENSG00000273102 | -0.51128 | -1.637813 | 1 | 1 AP000569.9    | -      |
| ENSG00000273331 | -0.51128 | -1.637813 | 1 | 1 TM4SF19       | -      |
| ENSG00000273353 | -0.51128 | -1.637813 | 1 | 1 CTA-268H5.12  | -      |
| ENSG00000273369 | -0.51128 | -1.637813 | 1 | 1 RP11-700J17.1 | -      |
| ENSG00000037280 | 0.43309  | -1.453784 | 1 | 1 FLT4          | K05097 |
| ENSG00000057468 | 0.43309  | -1.453784 | 1 | 1 MSH4          | K08740 |
| ENSG00000064489 | 0.43309  | -1.453784 | 1 | 1 MEF2BNB-MEF2B | K09261 |
| ENSG00000069188 | 0.43309  | -1.453784 | 1 | 1 SDK2          | K16353 |
| ENSG00000095303 | 0.43309  | -1.453784 | 1 | 1 PTGS1         | K00509 |
| ENSG00000099282 | 0.43309  | -1.453784 | 1 | 1 TSPAN15       | K17297 |
| ENSG00000099337 | 0.43309  | -1.453784 | 1 | 1 KCNK6         | K17985 |
| ENSG00000101335 | 0.43309  | -1.453784 | 1 | 1 MYL9          | K12755 |
| ENSG00000110076 | 0.43309  | -1.453784 | 1 | 1 NRXN2         | K07377 |
| ENSG00000111728 | 0.43309  | -1.453784 | 1 | 1 ST8SIA1       | K03371 |
| ENSG00000112706 | 0.43309  | -1.453784 | 1 | 1 IMPG1         | K19016 |
| ENSG00000118849 | 0.43309  | -1.453784 | 1 | 1 RARRES1       | -      |
| ENSG00000122735 | 0.43309  | -1.453784 | 1 | 1 DNAI1         | K10409 |
| ENSG00000124091 | 0.43309  | -1.453784 | 1 | 1 GCNT7         | -      |
| ENSG00000131080 | 0.43309  | -1.453784 | 1 | 1 EDA2R         | K05163 |
| ENSG00000132207 | 0.43309  | -1.453784 | 1 | 1 SLX1A         | K15078 |
| ENSG00000133106 | 0.43309  | -1.453784 | 1 | 1 EPSTI1        | -      |
| ENSG00000134339 | 0.43309  | -1.453784 | 1 | 1 SAA2          | K17310 |
| ENSG00000135299 | 0.43309  | -1.453784 | 1 | 1 ANKRD6        | -      |
| ENSG00000136011 | 0.43309  | -1.453784 | 1 | 1 STAB2         | K19013 |
| ENSG00000143184 | 0.43309  | -1.453784 | 1 | 1 XCL1          | K05507 |

|                 |         |           |   |                    |        |
|-----------------|---------|-----------|---|--------------------|--------|
| ENSG00000143318 | 0.43309 | -1.453784 | 1 | 1 CASQ1            | K17985 |
| ENSG00000146005 | 0.43309 | -1.453784 | 1 | 1 PSD2             | K12494 |
| ENSG00000148795 | 0.43309 | -1.453784 | 1 | 1 CYP17A1          | K00512 |
| ENSG00000152580 | 0.43309 | -1.453784 | 1 | 1 IGSF10           | -      |
| ENSG00000152689 | 0.43309 | -1.453784 | 1 | 1 RASGRP3          | K12362 |
| ENSG00000159899 | 0.43309 | -1.453784 | 1 | 1 NPR2             | K12324 |
| ENSG00000162391 | 0.43309 | -1.453784 | 1 | 1 FAM151A          | -      |
| ENSG00000165197 | 0.43309 | -1.453784 | 1 | 1 FIGF             | K05449 |
| ENSG00000171388 | 0.43309 | -1.453784 | 1 | 1 APLN             | K05225 |
| ENSG00000173258 | 0.43309 | -1.453784 | 1 | 1 ZNF483           | K09229 |
| ENSG00000178814 | 0.43309 | -1.453784 | 1 | 1 OPLAH            | K01469 |
| ENSG00000181264 | 0.43309 | -1.453784 | 1 | 1 TMEM136          | -      |
| ENSG00000183066 | 0.43309 | -1.453784 | 1 | 1 WBP2NL           | -      |
| ENSG00000184988 | 0.43309 | -1.453784 | 1 | 1 TMEM106A         | -      |
| ENSG00000185559 | 0.43309 | -1.453784 | 1 | 1 DLK1             | -      |
| ENSG00000188100 | 0.43309 | -1.453784 | 1 | 1 FAM25A           | -      |
| ENSG00000188487 | 0.43309 | -1.453784 | 1 | 1 INSC             | -      |
| ENSG00000197696 | 0.43309 | -1.453784 | 1 | 1 NMB              | K05223 |
| ENSG00000198393 | 0.43309 | -1.453784 | 1 | 1 ZNF26            | K09228 |
| ENSG00000202058 | 0.43309 | -1.453784 | 1 | 1 RN7SKP80         | -      |
| ENSG00000203276 | 0.43309 | -1.453784 | 1 | 1 AL353898.2       | K11447 |
| ENSG00000203684 | 0.43309 | -1.453784 | 1 | 1 IBA57-AS1        | -      |
| ENSG00000204173 | 0.43309 | -1.453784 | 1 | 1 LRRC37A5P        | -      |
| ENSG00000206172 | 0.43309 | -1.453784 | 1 | 1 HBA1             | K13822 |
| ENSG00000206630 | 0.43309 | -1.453784 | 1 | 1 SNORD60          | -      |
| ENSG00000212371 | 0.43309 | -1.453784 | 1 | 1 SNORA46          | -      |
| ENSG00000213130 | 0.43309 | -1.453784 | 1 | 1 EEF1DP5          | K15410 |
| ENSG00000213132 | 0.43309 | -1.453784 | 1 | 1 AC022498.1       | -      |
| ENSG00000213135 | 0.43309 | -1.453784 | 1 | 1 AC015815.6       | K09228 |
| ENSG00000213514 | 0.43309 | -1.453784 | 1 | 1 RP11-428P16.2    | -      |
| ENSG00000214973 | 0.43309 | -1.453784 | 1 | 1 CHCHD3P3         | K17563 |
| ENSG00000214999 | 0.43309 | -1.453784 | 1 | 1 AC129492.6       | K08021 |
| ENSG00000215472 | 0.43309 | -1.453784 | 1 | 1 RPL17-C18orf32   | K02880 |
| ENSG00000215863 | 0.43309 | -1.453784 | 1 | 1 LINC01138        | -      |
| ENSG00000217325 | 0.43309 | -1.453784 | 1 | 1 PRELID1P1        | -      |
| ENSG00000219395 | 0.43309 | -1.453784 | 1 | 1 HSPA8P15         | -      |
| ENSG00000220920 | 0.43309 | -1.453784 | 1 | 1 RP3-525L6.2      | -      |
| ENSG00000222043 | 0.43309 | -1.453784 | 1 | 1 AC079305.10      | -      |
| ENSG00000222071 | 0.43309 | -1.453784 | 1 | 1 MIR1915          | -      |
| ENSG00000222533 | 0.43309 | -1.453784 | 1 | 1 RNU6-705P        | -      |
| ENSG00000223714 | 0.43309 | -1.453784 | 1 | 1 RP5-1172N10.2    | -      |
| ENSG00000224452 | 0.43309 | -1.453784 | 1 | 1 RSL24D1P6        | K02896 |
| ENSG00000224905 | 0.43309 | -1.453784 | 1 | 1 AP001347.6       | -      |
| ENSG00000224969 | 0.43309 | -1.453784 | 1 | 1 RP11-5407.11     | -      |
| ENSG00000225113 | 0.43309 | -1.453784 | 1 | 1 RP5-1160K1.3     | -      |
| ENSG00000225400 | 0.43309 | -1.453784 | 1 | 1 RP11-1114A5.5    | K07915 |
| ENSG00000225531 | 0.43309 | -1.453784 | 1 | 1 RP11-196I18.3    | K08964 |
| ENSG00000226891 | 0.43309 | -1.453784 | 1 | 1 RP11-182I10.3    | -      |
| ENSG00000227959 | 0.43309 | -1.453784 | 1 | 1 RP11-276H7.2     | -      |
| ENSG00000228444 | 0.43309 | -1.453784 | 1 | 1 RP11-173B14.4    | -      |
| ENSG00000229207 | 0.43309 | -1.453784 | 1 | 1 SERPINH1P1       | K09501 |
| ENSG00000229222 | 0.43309 | -1.453784 | 1 | 1 KRT18P4          | K07604 |
| ENSG00000229388 | 0.43309 | -1.453784 | 1 | 1 RP11-442N24__B.1 | -      |
| ENSG00000229901 | 0.43309 | -1.453784 | 1 | 1 RP11-399E6.4     | -      |
| ENSG00000230528 | 0.43309 | -1.453784 | 1 | 1 NOS2P3           | K13241 |
| ENSG00000231119 | 0.43309 | -1.453784 | 1 | 1 RP4-569M23.2     | -      |
| ENSG00000232470 | 0.43309 | -1.453784 | 1 | 1 RP11-313D6.3     | -      |
| ENSG00000232876 | 0.43309 | -1.453784 | 1 | 1 CTA-212D2.2      | -      |

|                 |         |           |   |                  |        |
|-----------------|---------|-----------|---|------------------|--------|
| ENSG00000232907 | 0.43309 | -1.453784 | 1 | 1 RP5-977B1.7    | -      |
| ENSG00000233231 | 0.43309 | -1.453784 | 1 | 1 HNRNPA1P49     | K12741 |
| ENSG00000233436 | 0.43309 | -1.453784 | 1 | 1 BTBD18         | -      |
| ENSG00000233967 | 0.43309 | -1.453784 | 1 | 1 RP11-250B2.3   | -      |
| ENSG00000234264 | 0.43309 | -1.453784 | 1 | 1 RP4-694A7.4    | -      |
| ENSG00000234289 | 0.43309 | -1.453784 | 1 | 1 H2BFS          | K11252 |
| ENSG00000234337 | 0.43309 | -1.453784 | 1 | 1 RP11-297L17.6  | K09290 |
| ENSG00000235408 | 0.43309 | -1.453784 | 1 | 1 SNORA71B       | -      |
| ENSG00000235958 | 0.43309 | -1.453784 | 1 | 1 UBOX5-AS1      | -      |
| ENSG00000236197 | 0.43309 | -1.453784 | 1 | 1 AC002429.5     | -      |
| ENSG00000236662 | 0.43309 | -1.453784 | 1 | 1 RP11-108L7.4   | -      |
| ENSG00000236969 | 0.43309 | -1.453784 | 1 | 1 GGT8P          | K18592 |
| ENSG00000238260 | 0.43309 | -1.453784 | 1 | 1 RP11-46F15.2   | -      |
| ENSG00000239033 | 0.43309 | -1.453784 | 1 | 1 snoU13         | -      |
| ENSG00000239556 | 0.43309 | -1.453784 | 1 | 1 AC004951.5     | -      |
| ENSG00000240163 | 0.43309 | -1.453784 | 1 | 1 RP11-745A24.1  | K02929 |
| ENSG00000240571 | 0.43309 | -1.453784 | 1 | 1 RP11-775D22.3  | -      |
| ENSG00000241889 | 0.43309 | -1.453784 | 1 | 1 RP11-435F17.3  | K17617 |
| ENSG00000242853 | 0.43309 | -1.453784 | 1 | 1 RN7SL749P      | -      |
| ENSG00000242960 | 0.43309 | -1.453784 | 1 | 1 FTH1P23        | K00522 |
| ENSG00000243766 | 0.43309 | -1.453784 | 1 | 1 HOTTIP         | -      |
| ENSG00000243964 | 0.43309 | -1.453784 | 1 | 1 RP11-16F15.1   | K02893 |
| ENSG00000247675 | 0.43309 | -1.453784 | 1 | 1 LRP4-AS1       | -      |
| ENSG00000249661 | 0.43309 | -1.453784 | 1 | 1 TNRC18P1       | -      |
| ENSG00000249685 | 0.43309 | -1.453784 | 1 | 1 RP11-360F5.3   | -      |
| ENSG00000250068 | 0.43309 | -1.453784 | 1 | 1 RP11-576C12.1  | -      |
| ENSG00000250069 | 0.43309 | -1.453784 | 1 | 1 CTB-131B5.2    | -      |
| ENSG00000250365 | 0.43309 | -1.453784 | 1 | 1 CTD-2213F21.2  | -      |
| ENSG00000251307 | 0.43309 | -1.453784 | 1 | 1 RP11-506H20.1  | -      |
| ENSG00000253666 | 0.43309 | -1.453784 | 1 | 1 KB-1615E4.2    | -      |
| ENSG00000254294 | 0.43309 | -1.453784 | 1 | 1 IMPDH1P6       | K00088 |
| ENSG00000254419 | 0.43309 | -1.453784 | 1 | 1 RP11-261P9.4   | -      |
| ENSG00000255062 | 0.43309 | -1.453784 | 1 | 1 RP11-712L6.5   | -      |
| ENSG00000255445 | 0.43309 | -1.453784 | 1 | 1 RP11-573M3.3   | -      |
| ENSG00000257298 | 0.43309 | -1.453784 | 1 | 1 RP3-405J10.3   | -      |
| ENSG00000257534 | 0.43309 | -1.453784 | 1 | 1 RP11-834C11.10 | -      |
| ENSG00000257921 | 0.43309 | -1.453784 | 1 | 1 RP11-571M6.15  | K02357 |
| ENSG00000258273 | 0.43309 | -1.453784 | 1 | 1 RP11-370I10.4  | K08789 |
| ENSG00000258344 | 0.43309 | -1.453784 | 1 | 1 RP11-968A15.8  | -      |
| ENSG00000258359 | 0.43309 | -1.453784 | 1 | 1 PCNPP1         | -      |
| ENSG00000258819 | 0.43309 | -1.453784 | 1 | 1 RP11-7F17.3    | -      |
| ENSG00000258984 | 0.43309 | -1.453784 | 1 | 1 UBE2F-SCLY     | K01763 |
| ENSG00000259056 | 0.43309 | -1.453784 | 1 | 1 DUXAP1         | -      |
| ENSG00000259315 | 0.43309 | -1.453784 | 1 | 1 RP11-752G15.9  | K05692 |
| ENSG00000259381 | 0.43309 | -1.453784 | 1 | 1 RP11-192M23.1  | K14863 |
| ENSG00000259498 | 0.43309 | -1.453784 | 1 | 1 RP11-244F12.3  | -      |
| ENSG00000260037 | 0.43309 | -1.453784 | 1 | 1 CTD-2524L6.3   | -      |
| ENSG00000260425 | 0.43309 | -1.453784 | 1 | 1 LA16c-316G12.2 | -      |
| ENSG00000261386 | 0.43309 | -1.453784 | 1 | 1 CTD-2012K14.6  | -      |
| ENSG00000261487 | 0.43309 | -1.453784 | 1 | 1 AC135048.13    | -      |
| ENSG00000261759 | 0.43309 | -1.453784 | 1 | 1 RP11-626G11.3  | -      |
| ENSG00000261773 | 0.43309 | -1.453784 | 1 | 1 WI2-89031B12.1 | -      |
| ENSG00000263214 | 0.43309 | -1.453784 | 1 | 1 ZNF205-AS1     | -      |
| ENSG00000263968 | 0.43309 | -1.453784 | 1 | 1 RN7SL381P      | -      |
| ENSG00000264007 | 0.43309 | -1.453784 | 1 | 1 RP11-68I3.10   | -      |
| ENSG00000264091 | 0.43309 | -1.453784 | 1 | 1 AP002495.1     | -      |
| ENSG00000264554 | 0.43309 | -1.453784 | 1 | 1 RN7SL793P      | -      |
| ENSG00000264808 | 0.43309 | -1.453784 | 1 | 1 MIR4523        | -      |

|                 |          |           |   |                    |        |
|-----------------|----------|-----------|---|--------------------|--------|
| ENSG00000265661 | 0.43309  | -1.453784 | 1 | 1 MIR3118-2        | -      |
| ENSG00000266910 | 0.43309  | -1.453784 | 1 | 1 CTC-448F2.6      | K14535 |
| ENSG00000267167 | 0.43309  | -1.453784 | 1 | 1 RP11-687F6.1     | -      |
| ENSG00000267474 | 0.43309  | -1.453784 | 1 | 1 CTC-548K16.6     | -      |
| ENSG00000267532 | 0.43309  | -1.453784 | 1 | 1 MIR497HG         | -      |
| ENSG00000267571 | 0.43309  | -1.453784 | 1 | 1 AC104532.4       | -      |
| ENSG00000267710 | 0.43309  | -1.453784 | 1 | 1 AC006116.20      | -      |
| ENSG00000267898 | 0.43309  | -1.453784 | 1 | 1 CTD-2639E6.9     | -      |
| ENSG00000269243 | 0.43309  | -1.453784 | 1 | 1 CTD-2231E14.8    | -      |
| ENSG00000269946 | 0.43309  | -1.453784 | 1 | 1 RP11-2B6.3       | -      |
| ENSG00000270800 | 0.43309  | -1.453784 | 1 | 1 RPS10-NUDT3      | K02947 |
| ENSG00000271580 | 0.43309  | -1.453784 | 1 | 1 RP11-536L3.4     | -      |
| ENSG00000271788 | 0.43309  | -1.453784 | 1 | 1 CTD-2201E18.5    | -      |
| ENSG00000272183 | 0.43309  | -1.453784 | 1 | 1 RP11-523H20.3    | -      |
| ENSG00000272975 | 0.43309  | -1.453784 | 1 | 1 CTC-297N7.11     | -      |
| ENSG00000273064 | 0.43309  | -1.453784 | 1 | 1 RP11-474G23.3    | -      |
| ENSG00000273218 | 0.43309  | -1.453784 | 1 | 1 LLNLR-246C6.1    | -      |
| ENSG00000273249 | 0.43309  | -1.453784 | 1 | 1 LL09NC01-251B2.3 | -      |
| ENSG00000002079 | 0.293016 | -1.038791 | 1 | 1 MYH16            | K17751 |
| ENSG00000006116 | 0.293016 | -1.038791 | 1 | 1 CACNG3           | K04868 |
| ENSG00000047648 | 0.293016 | -1.038791 | 1 | 1 ARHGAP6          | -      |
| ENSG00000079101 | 0.293016 | -1.038791 | 1 | 1 CLUL1            | -      |
| ENSG00000099338 | 0.293016 | -1.038791 | 1 | 1 CATSPERG         | K16894 |
| ENSG00000108924 | 0.293016 | -1.038791 | 1 | 1 HLF              | K09057 |
| ENSG00000109101 | 0.293016 | -1.038791 | 1 | 1 FOXN1            | K09407 |
| ENSG00000133640 | 0.293016 | -1.038791 | 1 | 1 LRRIQ1           | -      |
| ENSG00000135253 | 0.293016 | -1.038791 | 1 | 1 KCP              | -      |
| ENSG00000139946 | 0.293016 | -1.038791 | 1 | 1 PELI2            | K11964 |
| ENSG00000146469 | 0.293016 | -1.038791 | 1 | 1 VIP              | K05264 |
| ENSG00000162039 | 0.293016 | -1.038791 | 1 | 1 MEIOB            | K01557 |
| ENSG00000162745 | 0.293016 | -1.038791 | 1 | 1 OLFML2B          | -      |
| ENSG00000162997 | 0.293016 | -1.038791 | 1 | 1 PRORSD1P         | K12581 |
| ENSG00000164404 | 0.293016 | -1.038791 | 1 | 1 GDF9             | K05498 |
| ENSG00000171060 | 0.293016 | -1.038791 | 1 | 1 C8orf74          | -      |
| ENSG00000171786 | 0.293016 | -1.038791 | 1 | 1 NHLH1            | K09075 |
| ENSG00000172139 | 0.293016 | -1.038791 | 1 | 1 SLC9C1           | K14726 |
| ENSG00000175868 | 0.293016 | -1.038791 | 1 | 1 CALCB            | K12332 |
| ENSG00000182791 | 0.293016 | -1.038791 | 1 | 1 CCDC87           | -      |
| ENSG00000184956 | 0.293016 | -1.038791 | 1 | 1 MUC6             | -      |
| ENSG00000188596 | 0.293016 | -1.038791 | 1 | 1 C12orf55         | -      |
| ENSG00000189269 | 0.293016 | -1.038791 | 1 | 1 C22orf43         | -      |
| ENSG00000196218 | 0.293016 | -1.038791 | 1 | 1 RYR1             | K04961 |
| ENSG00000198590 | 0.293016 | -1.038791 | 1 | 1 C3orf35          | -      |
| ENSG00000199266 | 0.293016 | -1.038791 | 1 | 1 SNORA60          | -      |
| ENSG00000211689 | 0.293016 | -1.038791 | 1 | 1 TRGC1            | -      |
| ENSG00000214093 | 0.293016 | -1.038791 | 1 | 1 RP11-247I13.3    | K02964 |
| ENSG00000214832 | 0.293016 | -1.038791 | 1 | 1 UPF3AP2          | K14328 |
| ENSG00000214851 | 0.293016 | -1.038791 | 1 | 1 LINC00612        | -      |
| ENSG00000215784 | 0.293016 | -1.038791 | 1 | 1 FAM72D           | -      |
| ENSG00000224271 | 0.293016 | -1.038791 | 1 | 1 RP11-191L9.4     | -      |
| ENSG00000224616 | 0.293016 | -1.038791 | 1 | 1 RP11-305E17.6    | -      |
| ENSG00000226180 | 0.293016 | -1.038791 | 1 | 1 AC010536.1       | K19530 |
| ENSG00000227060 | 0.293016 | -1.038791 | 1 | 1 LINC00629        | -      |
| ENSG00000229677 | 0.293016 | -1.038791 | 1 | 1 RP11-383F6.1     | K02880 |
| ENSG00000232310 | 0.293016 | -1.038791 | 1 | 1 RP11-557H15.4    | -      |
| ENSG00000232888 | 0.293016 | -1.038791 | 1 | 1 RPS11P5          | K02949 |
| ENSG00000234807 | 0.293016 | -1.038791 | 1 | 1 LINC01135        | -      |
| ENSG00000237054 | 0.293016 | -1.038791 | 1 | 1 PRMT5-AS1        | -      |

|                 |           |           |   |                  |        |
|-----------------|-----------|-----------|---|------------------|--------|
| ENSG00000238035 | 0.293016  | -1.038791 | 1 | 1 AC138035.2     | -      |
| ENSG00000239763 | 0.293016  | -1.038791 | 1 | 1 AC009120.3     | K02889 |
| ENSG00000242349 | 0.293016  | -1.038791 | 1 | 1 NPPA-AS1       | -      |
| ENSG00000243824 | 0.293016  | -1.038791 | 1 | 1 RP11-434O22.1  | K02870 |
| ENSG00000246523 | 0.293016  | -1.038791 | 1 | 1 RP11-736K20.6  | -      |
| ENSG00000247595 | 0.293016  | -1.038791 | 1 | 1 SPTY2D1-AS1    | -      |
| ENSG00000248559 | 0.293016  | -1.038791 | 1 | 1 RP11-215P8.3   | -      |
| ENSG00000249839 | 0.293016  | -1.038791 | 1 | 1 AC011330.5     | K13024 |
| ENSG00000251417 | 0.293016  | -1.038791 | 1 | 1 RP11-1348G14.4 | -      |
| ENSG00000253170 | 0.293016  | -1.038791 | 1 | 1 RP11-431J17.1  | -      |
| ENSG00000254851 | 0.293016  | -1.038791 | 1 | 1 RP11-109L13.1  | K08673 |
| ENSG00000254859 | 0.293016  | -1.038791 | 1 | 1 RP11-661A12.5  | -      |
| ENSG00000256383 | 0.293016  | -1.038791 | 1 | 1 AC020910.2     | -      |
| ENSG00000257038 | 0.293016  | -1.038791 | 1 | 1 RP11-800A3.7   | -      |
| ENSG00000259577 | 0.293016  | -1.038791 | 1 | 1 RP11-430B1.2   | -      |
| ENSG00000260274 | 0.293016  | -1.038791 | 1 | 1 RP11-817O13.8  | -      |
| ENSG00000264329 | 0.293016  | -1.038791 | 1 | 1 MIR3911        | -      |
| ENSG00000265474 | 0.293016  | -1.038791 | 1 | 1 AC010761.9     | -      |
| ENSG00000266921 | 0.293016  | -1.038791 | 1 | 1 RP11-15A1.7    | -      |
| ENSG00000267544 | 0.293016  | -1.038791 | 1 | 1 AC007229.3     | -      |
| ENSG00000268364 | 0.293016  | -1.038791 | 1 | 1 SMC5-AS1       | -      |
| ENSG00000269318 | 0.293016  | -1.038791 | 1 | 1 AC007292.3     | -      |
| ENSG00000269560 | 0.293016  | -1.038791 | 1 | 1 CTD-2192J16.21 | -      |
| ENSG00000269657 | 0.293016  | -1.038791 | 1 | 1 AC079210.1     | K12581 |
| ENSG00000269881 | 0.293016  | -1.038791 | 1 | 1 ITFG3          | K17258 |
| ENSG00000270890 | 0.293016  | -1.038791 | 1 | 1 RP3-468K18.6   | -      |
| ENSG00000271020 | 0.293016  | -1.038791 | 1 | 1 RP11-10C24.1   | -      |
| ENSG00000271914 | 0.293016  | -1.038791 | 1 | 1 RP4-789D17.5   | -      |
| ENSG00000272609 | 0.293016  | -1.038791 | 1 | 1 RP11-461M2.2   | -      |
| ENSG00000272864 | 0.293016  | -1.038791 | 1 | 1 RP11-17E13.2   | -      |
| ENSG00000101306 | -0.277893 | -0.471731 | 1 | 1 MYLK2          | K00907 |
| ENSG00000119703 | -0.277893 | -0.471731 | 1 | 1 ZC2HC1C        | -      |
| ENSG00000140323 | -0.277893 | -0.471731 | 1 | 1 DISP2          | -      |
| ENSG00000151846 | -0.277893 | -0.471731 | 1 | 1 PABPC3         | K13126 |
| ENSG00000157343 | -0.277893 | -0.471731 | 1 | 1 ARMC12         | -      |
| ENSG00000166343 | -0.277893 | -0.471731 | 1 | 1 MSS51          | K17656 |
| ENSG00000175564 | -0.277893 | -0.471731 | 1 | 1 UCP3           | K15103 |
| ENSG00000187952 | -0.277893 | -0.471731 | 1 | 1 HS6ST1P1       | K02514 |
| ENSG00000188801 | -0.277893 | -0.471731 | 1 | 1 ZNF322P1       | K09228 |
| ENSG00000196559 | -0.277893 | -0.471731 | 1 | 1 LINC00610      | -      |
| ENSG00000207383 | -0.277893 | -0.471731 | 1 | 1 Y_RNA          | -      |
| ENSG00000207554 | -0.277893 | -0.471731 | 1 | 1 MIR647         | -      |
| ENSG00000218350 | -0.277893 | -0.471731 | 1 | 1 LYPLA1P3       | K06128 |
| ENSG00000221299 | -0.277893 | -0.471731 | 1 | 1 Z83826.1       | -      |
| ENSG00000223572 | -0.277893 | -0.471731 | 1 | 1 CKMT1A         | K00933 |
| ENSG00000227295 | -0.277893 | -0.471731 | 1 | 1 ELL2P1         | K15183 |
| ENSG00000230537 | -0.277893 | -0.471731 | 1 | 1 RP11-305L7.1   | -      |
| ENSG00000233337 | -0.277893 | -0.471731 | 1 | 1 UBE2FP3        | K10687 |
| ENSG00000238279 | -0.277893 | -0.471731 | 1 | 1 BX470102.3     | -      |
| ENSG00000248592 | -0.277893 | -0.471731 | 1 | 1 TMEM110-MUSTN  | -      |
| ENSG00000250081 | -0.277893 | -0.471731 | 1 | 1 CTD-2116N20.1  | -      |
| ENSG00000250855 | -0.277893 | -0.471731 | 1 | 1 RP11-269F21.1  | -      |
| ENSG00000255026 | -0.277893 | -0.471731 | 1 | 1 RP11-326C3.2   | -      |
| ENSG00000261730 | -0.277893 | -0.471731 | 1 | 1 RP4-668J24.2   | -      |
| ENSG00000261732 | -0.277893 | -0.471731 | 1 | 1 LA16c-431H6.6  | K17985 |
| ENSG00000262703 | -0.277893 | -0.471731 | 1 | 1 RP11-485G7.6   | -      |
| ENSG00000013619 | -0.272916 | -1.177678 | 1 | 1 MAMLD1         | K19512 |
| ENSG00000089692 | -0.272916 | -1.177678 | 1 | 1 LAG3           | K06565 |

|                 |           |           |   |                 |               |
|-----------------|-----------|-----------|---|-----------------|---------------|
| ENSG00000103184 | -0.272916 | -1.177678 | 1 | 1 SEC14L5       | -             |
| ENSG00000108622 | -0.272916 | -1.177678 | 1 | 1 ICAM2         | K06523        |
| ENSG00000109339 | -0.272916 | -1.177678 | 1 | 1 MAPK10        | K04440        |
| ENSG00000112175 | -0.272916 | -1.177678 | 1 | 1 BMP5          | K04663        |
| ENSG00000124406 | -0.272916 | -1.177678 | 1 | 1 ATP8A1        | K14802        |
| ENSG00000128310 | -0.272916 | -1.177678 | 1 | 1 GALR3         | K04232        |
| ENSG00000129048 | -0.272916 | -1.177678 | 1 | 1 ACKR4         | K04186        |
| ENSG00000131885 | -0.272916 | -1.177678 | 1 | 1 KRT17P1       | K07604        |
| ENSG00000132141 | -0.272916 | -1.177678 | 1 | 1 CCT6B         | K09498        |
| ENSG00000145040 | -0.272916 | -1.177678 | 1 | 1 UCN2          | K05257        |
| ENSG00000146966 | -0.272916 | -1.177678 | 1 | 1 DENND2A       | -             |
| ENSG00000160224 | -0.272916 | -1.177678 | 1 | 1 AIRE          | K10603        |
| ENSG00000164304 | -0.272916 | -1.177678 | 1 | 1 CAGE1         | -             |
| ENSG00000170523 | -0.272916 | -1.177678 | 1 | 1 KRT83         | K07605        |
| ENSG00000173838 | -0.272916 | -1.177678 | 1 | 1               | 10-Mar K10665 |
| ENSG00000174514 | -0.272916 | -1.177678 | 1 | 1 MFSD4         | -             |
| ENSG00000179846 | -0.272916 | -1.177678 | 1 | 1 NKPD1         | -             |
| ENSG00000183153 | -0.272916 | -1.177678 | 1 | 1 GJD3          | K07627        |
| ENSG00000185689 | -0.272916 | -1.177678 | 1 | 1 C6orf201      | K13239        |
| ENSG00000186767 | -0.272916 | -1.177678 | 1 | 1 SPIN4         | -             |
| ENSG00000187556 | -0.272916 | -1.177678 | 1 | 1 NANOS3        | K18761        |
| ENSG00000197153 | -0.272916 | -1.177678 | 1 | 1 HIST1H3J      | K11253        |
| ENSG00000197670 | -0.272916 | -1.177678 | 1 | 1 RP4-724E16.2  | -             |
| ENSG00000197978 | -0.272916 | -1.177678 | 1 | 1 GOLGA6L9      | -             |
| ENSG00000198106 | -0.272916 | -1.177678 | 1 | 1 SNX29P2       | -             |
| ENSG00000200154 | -0.272916 | -1.177678 | 1 | 1 SNORD103A     | -             |
| ENSG00000204580 | -0.272916 | -1.177678 | 1 | 1 DDR1          | K05124        |
| ENSG00000205702 | -0.272916 | -1.177678 | 1 | 1 CYP2D7P       | K07414        |
| ENSG00000207181 | -0.272916 | -1.177678 | 1 | 1 SNORA14B      | -             |
| ENSG00000212175 | -0.272916 | -1.177678 | 1 | 1 SNORA12       | -             |
| ENSG00000214429 | -0.272916 | -1.177678 | 1 | 1 CYCSP6        | K08738        |
| ENSG00000225091 | -0.272916 | -1.177678 | 1 | 1 SNORA71A      | -             |
| ENSG00000225822 | -0.272916 | -1.177678 | 1 | 1 UBXN7-AS1     | -             |
| ENSG00000226312 | -0.272916 | -1.177678 | 1 | 1 CFLAR-AS1     | -             |
| ENSG00000227230 | -0.272916 | -1.177678 | 1 | 1 RP11-261C10.5 | -             |
| ENSG00000227848 | -0.272916 | -1.177678 | 1 | 1 SUCLA2-AS1    | -             |
| ENSG00000229528 | -0.272916 | -1.177678 | 1 | 1 RP5-1066H13.4 | -             |
| ENSG00000230623 | -0.272916 | -1.177678 | 1 | 1 RP11-469A15.2 | -             |
| ENSG00000230736 | -0.272916 | -1.177678 | 1 | 1 RP1-149A16.3  | -             |
| ENSG00000230836 | -0.272916 | -1.177678 | 1 | 1 AC104135.4    | -             |
| ENSG00000231050 | -0.272916 | -1.177678 | 1 | 1 RP1-140A9.1   | -             |
| ENSG00000232160 | -0.272916 | -1.177678 | 1 | 1 RAP2C-AS1     | -             |
| ENSG00000233491 | -0.272916 | -1.177678 | 1 | 1 AC010091.1    | -             |
| ENSG00000233859 | -0.272916 | -1.177678 | 1 | 1 ADH5P4        | K00121        |
| ENSG00000234155 | -0.272916 | -1.177678 | 1 | 1 RP11-30P6.6   | -             |
| ENSG00000234335 | -0.272916 | -1.177678 | 1 | 1 RPS4XP11      | K02987        |
| ENSG00000235092 | -0.272916 | -1.177678 | 1 | 1 AC011747.7    | -             |
| ENSG00000236307 | -0.272916 | -1.177678 | 1 | 1 AC104651.1    | K15439        |
| ENSG00000237238 | -0.272916 | -1.177678 | 1 | 1 BMS1P10       | K14569        |
| ENSG00000243244 | -0.272916 | -1.177678 | 1 | 1 STON1         | -             |
| ENSG00000244055 | -0.272916 | -1.177678 | 1 | 1 AC007566.10   | -             |
| ENSG00000248671 | -0.272916 | -1.177678 | 1 | 1 CTD-2313N18.5 | -             |
| ENSG00000249196 | -0.272916 | -1.177678 | 1 | 1 RP11-669N7.2  | -             |
| ENSG00000249786 | -0.272916 | -1.177678 | 1 | 1 EAF1-AS1      | -             |
| ENSG00000250848 | -0.272916 | -1.177678 | 1 | 1 CTD-2083E4.5  | K15425        |
| ENSG00000252965 | -0.272916 | -1.177678 | 1 | 1 Y_RNA         | -             |
| ENSG00000253366 | -0.272916 | -1.177678 | 1 | 1 RP11-589F5.4  | K01195        |
| ENSG00000254995 | -0.272916 | -1.177678 | 1 | 1 STX16-NPEPL1  | K08489        |



|                 |           |           |   |                    |        |
|-----------------|-----------|-----------|---|--------------------|--------|
| ENSG00000255774 | -0.272916 | -1.177678 | 1 | 1 AP000439.3       | --     |
| ENSG00000256879 | -0.272916 | -1.177678 | 1 | 1 RP11-284H19.1    | --     |
| ENSG00000257543 | -0.272916 | -1.177678 | 1 | 1 RP11-321F8.4     | --     |
| ENSG00000259867 | -0.272916 | -1.177678 | 1 | 1 RP11-525K10.3    | --     |
| ENSG00000260941 | -0.272916 | -1.177678 | 1 | 1 LINC00622        | --     |
| ENSG00000261253 | -0.272916 | -1.177678 | 1 | 1 AC137932.6       | --     |
| ENSG00000261305 | -0.272916 | -1.177678 | 1 | 1 RP4-584D14.7     | --     |
| ENSG00000261898 | -0.272916 | -1.177678 | 1 | 1 RP11-314A20.5    | --     |
| ENSG00000262003 | -0.272916 | -1.177678 | 1 | 1 RP11-676J12.7    | K04613 |
| ENSG00000263422 | -0.272916 | -1.177678 | 1 | 1 AC005702.1       | --     |
| ENSG00000263786 | -0.272916 | -1.177678 | 1 | 1 RP11-649A18.4    | --     |
| ENSG00000265413 | -0.272916 | -1.177678 | 1 | 1 RP11-789C17.1    | --     |
| ENSG00000266926 | -0.272916 | -1.177678 | 1 | 1 AC005943.4       | --     |
| ENSG00000267416 | -0.272916 | -1.177678 | 1 | 1 CTD-2319I12.2    | --     |
| ENSG00000267980 | -0.272916 | -1.177678 | 1 | 1 AC007292.6       | --     |
| ENSG00000268129 | -0.272916 | -1.177678 | 1 | 1 RP11-91G21.1     | --     |
| ENSG00000268568 | -0.272916 | -1.177678 | 1 | 1 AC007228.9       | --     |
| ENSG00000268945 | -0.272916 | -1.177678 | 1 | 1 CTD-2192J16.26   | --     |
| ENSG00000270022 | -0.272916 | -1.177678 | 1 | 1 RNU12            | --     |
| ENSG00000272065 | -0.272916 | -1.177678 | 1 | 1 U91328.20        | --     |
| ENSG00000272081 | -0.272916 | -1.177678 | 1 | 1 CTD-2376I4.2     | --     |
| ENSG00000272692 | -0.272916 | -1.177678 | 1 | 1 RP11-399K21.14   | --     |
| ENSG00000272721 | -0.272916 | -1.177678 | 1 | 1 RP11-778D9.12    | --     |
| ENSG00000272761 | -0.272916 | -1.177678 | 1 | 1 RP11-572C15.6    | --     |
| ENSG00000273004 | -0.272916 | -1.177678 | 1 | 1 GS1-279B7.2      | --     |
| ENSG00000004838 | 0.228977  | 0.081819  | 1 | 1 ZMYND10          | --     |
| ENSG00000182795 | 0.228977  | 0.081819  | 1 | 1 Clorf116         | --     |
| ENSG00000185614 | 0.228977  | 0.081819  | 1 | 1 FAM212A          | --     |
| ENSG00000214140 | 0.228977  | 0.081819  | 1 | 1 PRCB             | K19637 |
| ENSG00000225218 | 0.228977  | 0.081819  | 1 | 1 AP001628.6       | --     |
| ENSG00000234869 | 0.228977  | 0.081819  | 1 | 1 RP3-439F8.1      | --     |
| ENSG00000268912 | 0.228977  | 0.081819  | 1 | 1 CTD-2619J13.17   | --     |
| ENSG00000079393 | 0.226491  | -0.716902 | 1 | 1 DUSP13           | K14165 |
| ENSG00000129535 | 0.226491  | -0.716902 | 1 | 1 NRL              | K09038 |
| ENSG00000143344 | 0.226491  | -0.716902 | 1 | 1 RGL1             | K17635 |
| ENSG00000149328 | 0.226491  | -0.716902 | 1 | 1 GLB1L2           | --     |
| ENSG00000149346 | 0.226491  | -0.716902 | 1 | 1 SLX4IP           | --     |
| ENSG00000159784 | 0.226491  | -0.716902 | 1 | 1 FAM131B          | --     |
| ENSG00000179296 | 0.226491  | -0.716902 | 1 | 1 CTGLF12P         | K12491 |
| ENSG00000180672 | 0.226491  | -0.716902 | 1 | 1 AC007362.1       | --     |
| ENSG00000183542 | 0.226491  | -0.716902 | 1 | 1 KLRC4            | K06541 |
| ENSG00000185565 | 0.226491  | -0.716902 | 1 | 1 LSAMP            | K06772 |
| ENSG00000188610 | 0.226491  | -0.716902 | 1 | 1 FAM72B           | --     |
| ENSG00000213943 | 0.226491  | -0.716902 | 1 | 1 KRT18P17         | K07604 |
| ENSG00000215414 | 0.226491  | -0.716902 | 1 | 1 PSMA6P1          | K02730 |
| ENSG00000215493 | 0.226491  | -0.716902 | 1 | 1 XXbac-B562F10.11 | K10450 |
| ENSG00000223551 | 0.226491  | -0.716902 | 1 | 1 TMSB4XP4         | K05764 |
| ENSG00000227440 | 0.226491  | -0.716902 | 1 | 1 ATP5G1P4         | K02128 |
| ENSG00000227742 | 0.226491  | -0.716902 | 1 | 1 CALR4P           | K08057 |
| ENSG00000230387 | 0.226491  | -0.716902 | 1 | 1 RP4-737E23.2     | --     |
| ENSG00000231351 | 0.226491  | -0.716902 | 1 | 1 AC111200.7       | --     |
| ENSG00000235448 | 0.226491  | -0.716902 | 1 | 1 RP11-3L8.3       | --     |
| ENSG00000235897 | 0.226491  | -0.716902 | 1 | 1 TM4SF19-AS1      | --     |
| ENSG00000238298 | 0.226491  | -0.716902 | 1 | 1 snoU13           | --     |
| ENSG00000242252 | 0.226491  | -0.716902 | 1 | 1 BGLAP            | K11546 |
| ENSG00000242968 | 0.226491  | -0.716902 | 1 | 1 RP11-731C17.1    | --     |
| ENSG00000243015 | 0.226491  | -0.716902 | 1 | 1 RN7SL737P        | --     |
| ENSG00000251179 | 0.226491  | -0.716902 | 1 | 1 RP11-893F2.9     | --     |

|                 |           |           |   |                 |        |
|-----------------|-----------|-----------|---|-----------------|--------|
| ENSG00000253824 | 0.226491  | -0.716902 | 1 | 1 KB-173C10.2   | -      |
| ENSG00000255819 | 0.226491  | -0.716902 | 1 | 1 KLRC4-KLRK1   | K06541 |
| ENSG00000256210 | 0.226491  | -0.716902 | 1 | 1 AC005255.3    | -      |
| ENSG00000259015 | 0.226491  | -0.716902 | 1 | 1 RP11-109N23.6 | -      |
| ENSG00000259291 | 0.226491  | -0.716902 | 1 | 1 RP11-617F23.1 | -      |
| ENSG00000259746 | 0.226491  | -0.716902 | 1 | 1 HSPE1P3       | K04078 |
| ENSG00000260063 | 0.226491  | -0.716902 | 1 | 1 RP5-968P14.2  | -      |
| ENSG00000260213 | 0.226491  | -0.716902 | 1 | 1 RP11-303E16.3 | -      |
| ENSG00000260290 | 0.226491  | -0.716902 | 1 | 1 CTD-2033A16.2 | K13214 |
| ENSG00000261168 | 0.226491  | -0.716902 | 1 | 1 RP11-68I18.10 | -      |
| ENSG00000261338 | 0.226491  | -0.716902 | 1 | 1 RP11-378A13.1 | -      |
| ENSG00000263818 | 0.226491  | -0.716902 | 1 | 1 CTD-2206N4.4  | K09228 |
| ENSG00000270060 | 0.226491  | -0.716902 | 1 | 1 RP11-390K5.6  | -      |
| ENSG00000272084 | 0.226491  | -0.716902 | 1 | 1 RP5-1126H10.2 | -      |
| ENSG00000272572 | 0.226491  | -0.716902 | 1 | 1 RP11-179B2.2  | -      |
| ENSG00000105642 | -0.220814 | -0.248569 | 1 | 1 KCNN1         | -      |
| ENSG00000112309 | -0.220814 | -0.248569 | 1 | 1 B3GAT2        | K10157 |
| ENSG00000153294 | -0.220814 | -0.248569 | 1 | 1 GPR115        | K08457 |
| ENSG00000168542 | -0.220814 | -0.248569 | 1 | 1 COL3A1        | K19720 |
| ENSG00000176029 | -0.220814 | -0.248569 | 1 | 1 C11orf16      | -      |
| ENSG00000188033 | -0.220814 | -0.248569 | 1 | 1 ZNF490        | K09228 |
| ENSG00000188095 | -0.220814 | -0.248569 | 1 | 1 MESP2         | K09076 |
| ENSG00000206559 | -0.220814 | -0.248569 | 1 | 1 ZCWPW2        | -      |
| ENSG00000214558 | -0.220814 | -0.248569 | 1 | 1 RP11-74E24.2  | -      |
| ENSG00000227619 | -0.220814 | -0.248569 | 1 | 1 RP11-492E3.2  | -      |
| ENSG00000254165 | -0.220814 | -0.248569 | 1 | 1 RP11-503E24.2 | -      |
| ENSG00000256576 | -0.220814 | -0.248569 | 1 | 1 RP13-977J11.2 | -      |
| ENSG00000259354 | -0.220814 | -0.248569 | 1 | 1 RP11-519G16.3 | -      |
| ENSG00000265511 | -0.220814 | -0.248569 | 1 | 1 RP11-524F11.1 | -      |
| ENSG00000267213 | -0.220814 | -0.248569 | 1 | 1 AC007773.2    | -      |
| ENSG00000267242 | -0.220814 | -0.248569 | 1 | 1 AC069278.4    | -      |
| ENSG00000273265 | -0.220814 | -0.248569 | 1 | 1 RP11-353K11.1 | -      |
| ENSG00000095752 | -0.207083 | 0.310517  | 1 | 1 IL11          | K05417 |
| ENSG00000152380 | -0.207083 | 0.310517  | 1 | 1 FAM151B       | -      |
| ENSG00000152726 | -0.207083 | 0.310517  | 1 | 1 FAM21B        | K18462 |
| ENSG00000214562 | -0.207083 | 0.310517  | 1 | 1 NUTM2D        | -      |
| ENSG00000229431 | -0.207083 | 0.310517  | 1 | 1 RP1-92O14.6   | -      |
| ENSG00000245522 | -0.207083 | 0.310517  | 1 | 1 RP11-540A21.2 | -      |
| ENSG00000251550 | -0.207083 | 0.310517  | 1 | 1 RP11-501C14.7 | K18171 |
| ENSG00000255468 | -0.207083 | 0.310517  | 1 | 1 RP11-867G23.8 | K15014 |
| ENSG00000261888 | -0.207083 | 0.310517  | 1 | 1 AC144831.1    | -      |
| ENSG00000273145 | -0.207083 | 0.310517  | 1 | 1 CITF22-92A6.1 | -      |
| ENSG00000085231 | 0.187593  | -0.453904 | 1 | 1 TAF9          | K14535 |
| ENSG00000105737 | 0.187593  | -0.453904 | 1 | 1 GRIK5         | K05205 |
| ENSG00000163126 | 0.187593  | -0.453904 | 1 | 1 ANKRD23       | -      |
| ENSG00000166145 | 0.187593  | -0.453904 | 1 | 1 SPINT1        | K15619 |
| ENSG00000176909 | 0.187593  | -0.453904 | 1 | 1 MAMSTR        | -      |
| ENSG00000204164 | 0.187593  | -0.453904 | 1 | 1 BMS1P5        | K12491 |
| ENSG00000207864 | 0.187593  | -0.453904 | 1 | 1 MIR27B        | -      |
| ENSG00000224680 | 0.187593  | -0.453904 | 1 | 1 PLA2G12AP1    | K01047 |
| ENSG00000225171 | 0.187593  | -0.453904 | 1 | 1 DUTP6         | K01520 |
| ENSG00000226009 | 0.187593  | -0.453904 | 1 | 1 KCNIP2-AS1    | -      |
| ENSG00000226329 | 0.187593  | -0.453904 | 1 | 1 AC005682.6    | K14685 |
| ENSG00000228452 | 0.187593  | -0.453904 | 1 | 1 RP5-994D16.9  | -      |
| ENSG00000229589 | 0.187593  | -0.453904 | 1 | 1 ACVR2B-AS1    | -      |
| ENSG00000236671 | 0.187593  | -0.453904 | 1 | 1 PRKG1-AS1     | -      |
| ENSG00000237436 | 0.187593  | -0.453904 | 1 | 1 RP11-312B8.1  | -      |
| ENSG00000238083 | 0.187593  | -0.453904 | 1 | 1 LRRC37A2      | -      |

|                  |           |           |   |                 |        |
|------------------|-----------|-----------|---|-----------------|--------|
| ENSG00000254485  | 0.187593  | -0.453904 | 1 | 1 RP11-380O24.1 | -      |
| ENSG00000259706  | 0.187593  | -0.453904 | 1 | 1 HSP90B2P      | K09487 |
| ENSG00000260781  | 0.187593  | -0.453904 | 1 | 1 ARHGAP23P1    | -      |
| ENSG00000267439  | 0.187593  | -0.453904 | 1 | 1 AC002398.11   | -      |
| ENSG00000273313  | 0.187593  | -0.453904 | 1 | 1 RBAKDN        | -      |
| ENSG00000006740  | -0.181199 | -0.05522  | 1 | 1 ARHGAP44      | -      |
| ENSG00000019144  | -0.181199 | -0.05522  | 1 | 1 PHLDB1        | -      |
| ENSG000000091106 | -0.181199 | -0.05522  | 1 | 1 NLRC4         | K12805 |
| ENSG00000136197  | -0.181199 | -0.05522  | 1 | 1 C7orf25       | -      |
| ENSG00000173110  | -0.181199 | -0.05522  | 1 | 1 HSPA6         | K03283 |
| ENSG00000180336  | -0.181199 | -0.05522  | 1 | 1 C17orf104     | K13349 |
| ENSG00000215033  | -0.181199 | -0.05522  | 1 | 1 AL603965.1    | -      |
| ENSG00000221164  | -0.181199 | -0.05522  | 1 | 1 SNORA11       | -      |
| ENSG00000228439  | -0.181199 | -0.05522  | 1 | 1 TSTD3         | -      |
| ENSG00000230798  | -0.181199 | -0.05522  | 1 | 1 RP4-792G4.2   | -      |
| ENSG00000233056  | -0.181199 | -0.05522  | 1 | 1 ERVH48-1      | -      |
| ENSG00000237977  | -0.181199 | -0.05522  | 1 | 1 EIF4HP2       | -      |
| ENSG00000244693  | -0.181199 | -0.05522  | 1 | 1 CTAGE8        | -      |
| ENSG00000258101  | -0.181199 | -0.05522  | 1 | 1 RP11-977B10.2 | -      |
| ENSG00000263004  | -0.181199 | -0.05522  | 1 | 1 RP11-166P13.3 | -      |
| ENSG00000267653  | -0.181199 | -0.05522  | 1 | 1 RP1-193H18.3  | -      |
| ENSG00000002745  | -0.178936 | -0.829121 | 1 | 1 WNT16         | K01558 |
| ENSG000000087916 | -0.178936 | -0.829121 | 1 | 1 SLC6A14       | K05038 |
| ENSG00000110427  | -0.178936 | -0.829121 | 1 | 1 KIAA1549L     | -      |
| ENSG00000128596  | -0.178936 | -0.829121 | 1 | 1 CCDC136       | -      |
| ENSG00000130545  | -0.178936 | -0.829121 | 1 | 1 CRB3          | K06090 |
| ENSG00000132702  | -0.178936 | -0.829121 | 1 | 1 HAPLN2        | K06851 |
| ENSG00000143891  | -0.178936 | -0.829121 | 1 | 1 GALM          | K01785 |
| ENSG00000143994  | -0.178936 | -0.829121 | 1 | 1 ABHD1         | K13696 |
| ENSG00000157890  | -0.178936 | -0.829121 | 1 | 1 MEGF11        | -      |
| ENSG00000162892  | -0.178936 | -0.829121 | 1 | 1 IL24          | K05444 |
| ENSG00000164849  | -0.178936 | -0.829121 | 1 | 1 GPR146        | -      |
| ENSG00000177144  | -0.178936 | -0.829121 | 1 | 1 NUDT4P1       | K07766 |
| ENSG00000189136  | -0.178936 | -0.829121 | 1 | 1 UBE2Q2P1      | K10582 |
| ENSG00000189144  | -0.178936 | -0.829121 | 1 | 1 ZNF573        | K09228 |
| ENSG00000204149  | -0.178936 | -0.829121 | 1 | 1 AGAP6         | K12491 |
| ENSG00000218305  | -0.178936 | -0.829121 | 1 | 1 AC006024.4    | K06639 |
| ENSG00000225764  | -0.178936 | -0.829121 | 1 | 1 LEPREL1-AS1   | -      |
| ENSG00000226853  | -0.178936 | -0.829121 | 1 | 1 AC010894.3    | -      |
| ENSG00000228817  | -0.178936 | -0.829121 | 1 | 1 BACH1-IT2     | -      |
| ENSG00000230176  | -0.178936 | -0.829121 | 1 | 1 RP4-779E11.3  | -      |
| ENSG00000232216  | -0.178936 | -0.829121 | 1 | 1 IGHV3-43      | K06856 |
| ENSG00000232713  | -0.178936 | -0.829121 | 1 | 1 AC010733.5    | K02951 |
| ENSG00000232860  | -0.178936 | -0.829121 | 1 | 1 SMG7-AS1      | -      |
| ENSG00000233246  | -0.178936 | -0.829121 | 1 | 1 RP11-415J8.5  | -      |
| ENSG00000235314  | -0.178936 | -0.829121 | 1 | 1 LINC00957     | -      |
| ENSG00000236526  | -0.178936 | -0.829121 | 1 | 1 RP4-742J24.2  | -      |
| ENSG00000238041  | -0.178936 | -0.829121 | 1 | 1 RP11-59K5.1   | -      |
| ENSG00000240207  | -0.178936 | -0.829121 | 1 | 1 RP11-379F4.4  | -      |
| ENSG00000240350  | -0.178936 | -0.829121 | 1 | 1 AC017002.1    | -      |
| ENSG00000243224  | -0.178936 | -0.829121 | 1 | 1 RP5-1157M23.2 | -      |
| ENSG00000248257  | -0.178936 | -0.829121 | 1 | 1 PSG10P        | K06500 |
| ENSG00000249007  | -0.178936 | -0.829121 | 1 | 1 RP11-510N19.5 | -      |
| ENSG00000249628  | -0.178936 | -0.829121 | 1 | 1 LINC00942     | -      |
| ENSG00000251259  | -0.178936 | -0.829121 | 1 | 1 AC004069.2    | -      |
| ENSG00000251396  | -0.178936 | -0.829121 | 1 | 1 RP11-163N6.2  | -      |
| ENSG00000253508  | -0.178936 | -0.829121 | 1 | 1 RP1-170O19.14 | -      |
| ENSG00000253636  | -0.178936 | -0.829121 | 1 | 1 RP11-531A24.5 | -      |

|                 |           |           |   |                  |        |
|-----------------|-----------|-----------|---|------------------|--------|
| ENSG00000256633 | -0.178936 | -0.829121 | 1 | 1 RP11-169D4.2   | -      |
| ENSG00000258179 | -0.178936 | -0.829121 | 1 | 1 RP11-248E9.7   | K11087 |
| ENSG00000263335 | -0.178936 | -0.829121 | 1 | 1 AF001548.5     | -      |
| ENSG00000268947 | -0.178936 | -0.829121 | 1 | 1 AD000684.2     | -      |
| ENSG00000271882 | -0.178936 | -0.829121 | 1 | 1 KB-1410C5.5    | -      |
| ENSG00000272010 | -0.178936 | -0.829121 | 1 | 1 CTD-3025N20.3  | -      |
| ENSG00000273045 | -0.178936 | -0.829121 | 1 | 1 C2ORF15        | -      |
| ENSG00000273356 | -0.178936 | -0.829121 | 1 | 1 RP11-804H8.6   | -      |
| ENSG00000175911 | -0.152086 | 0.115352  | 1 | 1 AC127496.1     | K09228 |
| ENSG00000184925 | -0.152086 | 0.115352  | 1 | 1 LCN12          | -      |
| ENSG00000205771 | -0.152086 | 0.115352  | 1 | 1 CATSPER2P1     | K16890 |
| ENSG00000249684 | -0.152086 | 0.115352  | 1 | 1 RP11-423H2.3   | -      |
| ENSG00000103034 | 0.144016  | -0.038928 | 1 | 1 NDRG4          | -      |
| ENSG00000160111 | 0.144016  | -0.038928 | 1 | 1 CPAMD8         | -      |
| ENSG00000162068 | 0.144016  | -0.038928 | 1 | 1 NTN3           | K06844 |
| ENSG00000182057 | 0.144016  | -0.038928 | 1 | 1 Z83851.3       | -      |
| ENSG00000186409 | 0.144016  | -0.038928 | 1 | 1 CCDC30         | -      |
| ENSG00000186714 | 0.144016  | -0.038928 | 1 | 1 CCDC73         | K15030 |
| ENSG00000197813 | 0.144016  | -0.038928 | 1 | 1 CTC-301O7.4    | -      |
| ENSG00000206140 | 0.144016  | -0.038928 | 1 | 1 TMEM191C       | -      |
| ENSG00000233198 | 0.144016  | -0.038928 | 1 | 1 RNF224         | -      |
| ENSG00000241962 | 0.144016  | -0.038928 | 1 | 1 C2orf15        | K02907 |
| ENSG00000243477 | 0.144016  | -0.038928 | 1 | 1 NAT6           | -      |
| ENSG00000253210 | 0.144016  | -0.038928 | 1 | 1 RP11-809O17.1  | -      |
| ENSG00000263345 | 0.144016  | -0.038928 | 1 | 1 RP1-59D14.5    | -      |
| ENSG00000268543 | 0.144016  | -0.038928 | 1 | 1 CTD-2619J13.16 | -      |
| ENSG00000136490 | 0.130583  | 0.130969  | 1 | 1 LIMD2          | -      |
| ENSG00000163357 | 0.130583  | 0.130969  | 1 | 1 DCST1          | K10653 |
| ENSG00000163406 | 0.130583  | 0.130969  | 1 | 1 SLC15A2        | K14637 |
| ENSG00000176920 | 0.130583  | 0.130969  | 1 | 1 FUT2           | K00718 |
| ENSG00000184378 | 0.130583  | 0.130969  | 1 | 1 ACTRT3         | -      |
| ENSG00000224635 | 0.130583  | 0.130969  | 1 | 1 RP4-564F22.5   | -      |
| ENSG00000225507 | 0.130583  | 0.130969  | 1 | 1 AC069282.6     | K08866 |
| ENSG00000230163 | 0.130583  | 0.130969  | 1 | 1 RP5-997D16.2   | -      |
| ENSG00000235298 | 0.130583  | 0.130969  | 1 | 1 RP11-575L7.8   | -      |
| ENSG00000258469 | 0.130583  | 0.130969  | 1 | 1 CHMP4BP1       | K12194 |
| ENSG00000261597 | 0.130583  | 0.130969  | 1 | 1 RP11-353B9.1   | -      |
| ENSG00000267280 | 0.130583  | 0.130969  | 1 | 1 RP11-332H18.4  | -      |
| ENSG00000269423 | 0.130583  | 0.130969  | 1 | 1 CTC-273B12.6   | -      |
| ENSG00000272468 | 0.130583  | 0.130969  | 1 | 1 RP1-86C11.7    | -      |
| ENSG00000125508 | -0.129783 | 0.26795   | 1 | 1 SRMS           | K08895 |
| ENSG00000147255 | -0.129783 | 0.26795   | 1 | 1 IGSF1          | -      |
| ENSG00000186704 | -0.129783 | 0.26795   | 1 | 1 DTX2P1         | K06058 |
| ENSG00000245534 | -0.129783 | 0.26795   | 1 | 1 RP11-219B17.1  | -      |
| ENSG00000254595 | -0.129783 | 0.26795   | 1 | 1 CTD-2010I16.1  | K05862 |
| ENSG00000260448 | -0.129783 | 0.26795   | 1 | 1 RP11-449H11.1  | -      |
| ENSG00000260727 | -0.129783 | 0.26795   | 1 | 1 SLC7A5P1       | K13780 |
| ENSG00000262222 | -0.129783 | 0.26795   | 1 | 1 RP11-876N24.4  | -      |
| ENSG00000090920 | -0.128539 | -0.54844  | 1 | 1 FCGBP          | -      |
| ENSG00000100206 | -0.128539 | -0.54844  | 1 | 1 DMC1           | K10872 |
| ENSG00000105695 | -0.128539 | -0.54844  | 1 | 1 MAG            | K06771 |
| ENSG00000114923 | -0.128539 | -0.54844  | 1 | 1 SLC4A3         | K13856 |
| ENSG00000139985 | -0.128539 | -0.54844  | 1 | 1 ADAM21         | K08610 |
| ENSG00000154252 | -0.128539 | -0.54844  | 1 | 1 GAL3ST2        | K09675 |
| ENSG00000197540 | -0.128539 | -0.54844  | 1 | 1 GZMM           | K08649 |
| ENSG00000213648 | -0.128539 | -0.54844  | 1 | 1 SULT1A4        | K01014 |
| ENSG00000216906 | -0.128539 | -0.54844  | 1 | 1 RP11-350J20.9  | -      |
| ENSG00000217165 | -0.128539 | -0.54844  | 1 | 1 ANKRD18EP      | -      |

|                  |           |           |   |                  |        |
|------------------|-----------|-----------|---|------------------|--------|
| ENSG00000230185  | -0.128539 | -0.54844  | 1 | 1 C9orf147       | -      |
| ENSG00000230224  | -0.128539 | -0.54844  | 1 | 1 PHBP9          | K17080 |
| ENSG00000240006  | -0.128539 | -0.54844  | 1 | 1 RP11-200A1.1   | -      |
| ENSG00000257636  | -0.128539 | -0.54844  | 1 | 1 RP11-1103G16.1 | -      |
| ENSG00000260645  | -0.128539 | -0.54844  | 1 | 1 RP11-250B2.5   | -      |
| ENSG00000261071  | -0.128539 | -0.54844  | 1 | 1 RP1-223E5.4    | -      |
| ENSG00000263280  | -0.128539 | -0.54844  | 1 | 1 LA16c-325D7.2  | -      |
| ENSG00000269942  | -0.128539 | -0.54844  | 1 | 1 RP11-29B2.5    | -      |
| ENSG00000273000  | -0.128539 | -0.54844  | 1 | 1 KB-1572G7.2    | -      |
| ENSG00000273007  | -0.128539 | -0.54844  | 1 | 1 RP11-170N16.3  | -      |
| ENSG00000132016  | 0.120194  | 0.282947  | 1 | 1 C19orf57       | -      |
| ENSG00000154175  | 0.120194  | 0.282947  | 1 | 1 ABI3BP         | K08464 |
| ENSG00000163141  | 0.120194  | 0.282947  | 1 | 1 BNIPL          | K18448 |
| ENSG00000231663  | 0.120194  | 0.282947  | 1 | 1 RP5-827C21.4   | -      |
| ENSG00000239388  | 0.120194  | 0.282947  | 1 | 1 ASB14          | K10336 |
| ENSG00000254473  | 0.120194  | 0.282947  | 1 | 1 RP11-522I20.3  | -      |
| ENSG00000257390  | 0.120194  | 0.282947  | 1 | 1 RP11-762I7.5   | K09534 |
| ENSG00000269069  | 0.120194  | 0.282947  | 1 | 1 CTC-471F3.5    | K12617 |
| ENSG00000269974  | 0.120194  | 0.282947  | 1 | 1 RP11-932O9.10  | -      |
| ENSG00000272079  | 0.120194  | 0.282947  | 1 | 1 LA16c-380H5.5  | -      |
| ENSG00000272977  | 0.120194  | 0.282947  | 1 | 1 CTA-390C10.10  | -      |
| ENSG00000167377  | -0.098114 | 1.060879  | 1 | 1 ZNF23          | K09228 |
| ENSG00000221821  | -0.098114 | 1.060879  | 1 | 1 C6orf226       | -      |
| ENSG00000185414  | -0.097857 | 0.532045  | 1 | 1 MRPL30         | K02907 |
| ENSG00000198838  | -0.097857 | 0.532045  | 1 | 1 RYR3           | K04963 |
| ENSG00000215817  | -0.097857 | 0.532045  | 1 | 1 ZC3H11B        | -      |
| ENSG00000226920  | -0.097857 | 0.532045  | 1 | 1 RP5-1068B5.3   | -      |
| ENSG00000248432  | -0.097857 | 0.532045  | 1 | 1 RP11-269F21.2  | -      |
| ENSG00000273306  | -0.097857 | 0.532045  | 1 | 1 RP11-527J8.1   | -      |
| ENSG00000008516  | -0.097095 | -0.313455 | 1 | 1 MMP25          | K08003 |
| ENSG000000089505 | -0.097095 | -0.313455 | 1 | 1 CMTM1          | -      |
| ENSG00000124657  | -0.097095 | -0.313455 | 1 | 1 OR2B6          | K04257 |
| ENSG00000137673  | -0.097095 | -0.313455 | 1 | 1 MMP7           | K01397 |
| ENSG00000151117  | -0.097095 | -0.313455 | 1 | 1 TMEM86A        | -      |
| ENSG00000163430  | -0.097095 | -0.313455 | 1 | 1 FSTL1          | -      |
| ENSG00000163462  | -0.097095 | -0.313455 | 1 | 1 TRIM46         | K12022 |
| ENSG00000178386  | -0.097095 | -0.313455 | 1 | 1 ZNF223         | K09228 |
| ENSG00000179148  | -0.097095 | -0.313455 | 1 | 1 ALOXE3         | K18684 |
| ENSG00000187801  | -0.097095 | -0.313455 | 1 | 1 ZFP69B         | K09228 |
| ENSG00000212607  | -0.097095 | -0.313455 | 1 | 1 SNORA45        | -      |
| ENSG00000228878  | -0.097095 | -0.313455 | 1 | 1 AC007551.3     | -      |
| ENSG00000233930  | -0.097095 | -0.313455 | 1 | 1 KRTAP5-AS1     | -      |
| ENSG00000238120  | -0.097095 | -0.313455 | 1 | 1 CTA-941F9.9    | -      |
| ENSG00000243155  | -0.097095 | -0.313455 | 1 | 1 RP11-46A10.5   | -      |
| ENSG00000254676  | -0.097095 | -0.313455 | 1 | 1 RP11-727A23.4  | -      |
| ENSG00000257800  | -0.097095 | -0.313455 | 1 | 1 FNBP1P1        | K09488 |
| ENSG00000260269  | -0.097095 | -0.313455 | 1 | 1 CTD-2323K18.1  | -      |
| ENSG00000261438  | -0.097095 | -0.313455 | 1 | 1 RP11-399O19.9  | -      |
| ENSG00000264107  | -0.097095 | -0.313455 | 1 | 1 RP11-848P1.5   | -      |
| ENSG00000271550  | -0.097095 | -0.313455 | 1 | 1 RP11-561N12.7  | K09228 |
| ENSG00000271978  | -0.097095 | -0.313455 | 1 | 1 RP11-428J1.4   | -      |
| ENSG00000272370  | -0.097095 | -0.313455 | 1 | 1 RP11-307L14.1  | -      |
| ENSG00000170633  | -0.089965 | 1.142248  | 1 | 1 RNF34          | K10276 |
| ENSG00000212864  | -0.089965 | 1.142248  | 1 | 1 RNF208         | -      |
| ENSG00000231982  | -0.089965 | 1.142248  | 1 | 1 RP11-573D15.1  | -      |
| ENSG00000260065  | -0.089965 | 1.142248  | 1 | 1 CTA-445C9.15   | -      |
| ENSG00000267106  | -0.089965 | 1.142248  | 1 | 1 C19orf82       | K04613 |
| ENSG00000224186  | 0.087291  | 0.960903  | 1 | 1 C5orf66        | -      |

|                 |           |           |   |                  |        |
|-----------------|-----------|-----------|---|------------------|--------|
| ENSG00000102103 | -0.086347 | 1.5695    | 1 | 1 PQBP1          | K12865 |
| ENSG00000214106 | -0.086347 | 1.5695    | 1 | 1 PAXIP1-AS2     | K06115 |
| ENSG00000129038 | 0.084232  | 1.04835   | 1 | 1 LOXL1          | K14678 |
| ENSG00000166192 | 0.084232  | 1.04835   | 1 | 1 SENP8          | K08597 |
| ENSG00000130818 | 0.081537  | 1.130798  | 1 | 1 ZNF426         | K09228 |
| ENSG00000273142 | 0.081537  | 1.130798  | 1 | 1 RP11-458F8.4   | -      |
| ENSG00000159917 | -0.076267 | 1.292447  | 1 | 1 ZNF235         | K09228 |
| ENSG00000178226 | -0.076267 | 1.292447  | 1 | 1 PRSS36         | K09630 |
| ENSG00000179913 | -0.076267 | 1.292447  | 1 | 1 B3GNT3         | K07970 |
| ENSG00000217241 | -0.076267 | 1.292447  | 1 | 1 CBX3P9         | K11586 |
| ENSG00000258057 | -0.076267 | 1.292447  | 1 | 1 BCDIN3D-AS1    | -      |
| ENSG00000117009 | -0.075601 | -0.111345 | 1 | 1 KMO            | K00486 |
| ENSG00000147119 | -0.075601 | -0.111345 | 1 | 1 CHST7          | K04743 |
| ENSG00000153790 | -0.075601 | -0.111345 | 1 | 1 C7orf31        | -      |
| ENSG00000174521 | -0.075601 | -0.111345 | 1 | 1 TTC9B          | -      |
| ENSG00000213542 | -0.075601 | -0.111345 | 1 | 1 RP11-467H10.1  | K02936 |
| ENSG00000213707 | -0.075601 | -0.111345 | 1 | 1 HMGB1P10       | K10802 |
| ENSG00000228624 | -0.075601 | -0.111345 | 1 | 1 RP3-399L15.3   | -      |
| ENSG00000231989 | -0.075601 | -0.111345 | 1 | 1 PPP1R2P3       | K16833 |
| ENSG00000237126 | -0.075601 | -0.111345 | 1 | 1 AC073254.1     | -      |
| ENSG00000243902 | -0.075601 | -0.111345 | 1 | 1 RP1-63G5.5     | -      |
| ENSG00000247363 | -0.075601 | -0.111345 | 1 | 1 RP11-637A17.2  | -      |
| ENSG00000265242 | -0.075601 | -0.111345 | 1 | 1 RP11-649A18.7  | -      |
| ENSG00000267440 | -0.075601 | -0.111345 | 1 | 1 CTC-501O10.1   | -      |
| ENSG00000269899 | -0.075601 | -0.111345 | 1 | 1 RP11-589N15.2  | -      |
| ENSG00000270728 | -0.075601 | -0.111345 | 1 | 1 RP4-657E11.10  | -      |
| ENSG00000272144 | -0.075601 | -0.111345 | 1 | 1 CTD-2035E11.5  | -      |
| ENSG00000273026 | -0.075601 | -0.111345 | 1 | 1 RP11-422P24.10 | -      |
| ENSG00000250988 | 0.069005  | 1.60465   | 1 | 1 RP11-752G15.6  | -      |
| ENSG00000273038 | 0.066672  | 1.715663  | 1 | 1 RP11-479G22.8  | -      |
| ENSG00000144026 | -0.065203 | 1.428533  | 1 | 1 ZNF514         | K09228 |
| ENSG00000182109 | -0.065203 | 1.428533  | 1 | 1 RP11-69E11.4   | -      |
| ENSG00000114383 | -0.060318 | 0.948796  | 1 | 1 TUSC2          | -      |
| ENSG00000196118 | -0.060318 | 0.948796  | 1 | 1 C16orf93       | K10696 |
| ENSG00000232499 | -0.060318 | 0.948796  | 1 | 1 RP11-512F24.1  | K12741 |
| ENSG00000143248 | -0.059977 | 0.065968  | 1 | 1 RGS5           | K16449 |
| ENSG00000152042 | -0.059977 | 0.065968  | 1 | 1 NBPF11         | -      |
| ENSG00000196388 | -0.059977 | 0.065968  | 1 | 1 INCA1          | -      |
| ENSG00000246526 | -0.059977 | 0.065968  | 1 | 1 RP11-539L10.2  | -      |
| ENSG00000253187 | -0.059977 | 0.065968  | 1 | 1 HOXA10-AS      | -      |
| ENSG00000271992 | -0.059977 | 0.065968  | 1 | 1 RP11-42O15.3   | -      |
| ENSG00000171119 | -0.05608  | 1.552928  | 1 | 1 NRTN           | -      |
| ENSG00000271430 | -0.05608  | 1.552928  | 1 | 1 RP3-368A4.5    | -      |
| ENSG00000027075 | -0.053948 | 1.03662   | 1 | 1 PRKCH          | K18051 |
| ENSG00000240875 | -0.053948 | 1.03662   | 1 | 1 LINC00886      | -      |
| ENSG00000173825 | -0.052093 | 1.611337  | 1 | 1 TIGD3          | -      |
| ENSG00000215513 | -0.052093 | 1.611337  | 1 | 1 PI4KAP1        | K00888 |
| ENSG00000237149 | -0.052093 | 1.611337  | 1 | 1 ZNF503-AS2     | -      |
| ENSG00000235169 | -0.048347 | 1.119423  | 1 | 1 SMIM1          | -      |
| ENSG00000124159 | -0.048106 | 0.22391   | 1 | 1 MATN4          | K06053 |
| ENSG00000215302 | -0.048106 | 0.22391   | 1 | 1 CTD-3092A11.1  | K14559 |
| ENSG00000228302 | -0.048106 | 0.22391   | 1 | 1 RP11-186N15.3  | -      |
| ENSG00000240291 | -0.048106 | 0.22391   | 1 | 1 RP11-499P20.2  | -      |
| ENSG00000259806 | -0.048106 | 0.22391   | 1 | 1 CTD-2196E14.4  | -      |
| ENSG00000267123 | -0.048106 | 0.22391   | 1 | 1 CTD-2357A8.3   | -      |
| ENSG00000179456 | -0.045047 | 1.72153   | 1 | 1 ZBTB18         | -      |
| ENSG00000172250 | -0.043384 | 1.197745  | 1 | 1 SERHL          | -      |
| ENSG00000197128 | -0.043384 | 1.197745  | 1 | 1 ZNF772         | K09228 |

|                 |           |          |   |                    |        |
|-----------------|-----------|----------|---|--------------------|--------|
| ENSG00000270605 | -0.043384 | 1.197745 | 1 | 1 RP5-1092A3.4     | -      |
| ENSG00000137496 | -0.041918 | 1.773633 | 1 | 1 IL18BP           | -      |
| ENSG00000176125 | -0.039013 | 1.823926 | 1 | 1 UFSP1            | -      |
| ENSG00000188368 | -0.038955 | 1.272048 | 1 | 1 PRR19            | K17985 |
| ENSG00000216937 | -0.038955 | 1.272048 | 1 | 1 CCDC7            | -      |
| ENSG00000236264 | -0.038782 | 0.366298 | 1 | 1 RPL26P30         | K02898 |
| ENSG00000248099 | -0.038782 | 0.366298 | 1 | 1 INSL3            | K05255 |
| ENSG00000249129 | -0.038782 | 0.366298 | 1 | 1 SUDS3P1          | K19201 |
| ENSG00000267169 | -0.038782 | 0.366298 | 1 | 1 CTB-55O6.12      | -      |
| ENSG00000090932 | 0.038769  | 1.973042 | 1 | 1 DLL3             | K06051 |
| ENSG00000180855 | 0.038769  | 1.973042 | 1 | 1 ZNF443           | K09228 |
| ENSG00000237264 | 0.038769  | 1.973042 | 1 | 1 FTH1P11          | K00522 |
| ENSG00000162415 | 0.038753  | 1.782306 | 1 | 1 ZSWIM5           | -      |
| ENSG00000154153 | 0.038738  | 1.620653 | 1 | 1 FAM134B          | -      |
| ENSG00000129204 | 0.038733  | 1.562481 | 1 | 1 USP6             | K11837 |
| ENSG00000180938 | 0.038733  | 1.562481 | 1 | 1 ZNF572           | K09228 |
| ENSG00000253200 | 0.038733  | 1.562481 | 1 | 1 RP11-582J16.5    | -      |
| ENSG00000089163 | 0.038726  | 1.501867 | 1 | 1 SIRT4            | K11414 |
| ENSG00000109991 | 0.038719  | 1.438596 | 1 | 1 P2RX3            | K05217 |
| ENSG00000272821 | 0.038719  | 1.438596 | 1 | 1 CTA-384D8.36     | -      |
| ENSG00000234476 | 0.038712  | 1.372426 | 1 | 1 RP11-496N12.6    | -      |
| ENSG00000263126 | 0.038703  | 1.303077 | 1 | 1 CTC-479C5.10     | -      |
| ENSG00000074660 | 0.038694  | 1.23023  | 1 | 1 SCARF1           | -      |
| ENSG00000115363 | 0.038694  | 1.23023  | 1 | 1 EVA1A            | -      |
| ENSG00000185250 | 0.038694  | 1.23023  | 1 | 1 PPIL6            | K12739 |
| ENSG00000068001 | 0.038684  | 1.153513 | 1 | 1 HYAL2            | K01197 |
| ENSG00000244151 | 0.038684  | 1.153513 | 1 | 1 RP11-148K1.12    | -      |
| ENSG00000273486 | 0.038684  | 1.153513 | 1 | 1 RP11-731C17.2    | -      |
| ENSG00000266714 | 0.038672  | 1.072491 | 1 | 1 MYO15B           | K10361 |
| ENSG00000160828 | 0.038626  | 0.797968 | 1 | 1 STAG3L2          | K13055 |
| ENSG00000243547 | 0.038626  | 0.797968 | 1 | 1 HNRNPKP4         | K12886 |
| ENSG00000258645 | 0.038626  | 0.797968 | 1 | 1 HSPE1P2          | K04078 |
| ENSG00000261663 | 0.038626  | 0.797968 | 1 | 1 RP11-304L19.11   | -      |
| ENSG00000265817 | 0.038626  | 0.797968 | 1 | 1 FSBP             | K10877 |
| ENSG00000267372 | 0.038626  | 0.797968 | 1 | 1 AC005330.2       | -      |
| ENSG00000227398 | 0.038606  | 0.693499 | 1 | 1 KIF9-AS1         | -      |
| ENSG00000258311 | 0.038606  | 0.693499 | 1 | 1 RP11-644F5.10    | K00061 |
| ENSG00000261460 | 0.038606  | 0.693499 | 1 | 1 RP11-106M3.3     | -      |
| ENSG00000010310 | 0.038553  | 0.458739 | 1 | 1 GIPR             | K04580 |
| ENSG00000132010 | 0.038553  | 0.458739 | 1 | 1 ZNF20            | K17985 |
| ENSG00000154898 | 0.038553  | 0.458739 | 1 | 1 CCDC144CP        | K11837 |
| ENSG00000175920 | 0.038553  | 0.458739 | 1 | 1 DOK7             | -      |
| ENSG00000187010 | 0.038553  | 0.458739 | 1 | 1 RHD              | K06579 |
| ENSG00000188687 | 0.038553  | 0.458739 | 1 | 1 SLC4A5           | K13857 |
| ENSG00000196220 | 0.038553  | 0.458739 | 1 | 1 SRGAP3           | K07526 |
| ENSG00000198723 | 0.038553  | 0.458739 | 1 | 1 C19orf45         | -      |
| ENSG00000204866 | 0.038553  | 0.458739 | 1 | 1 IGFL2            | -      |
| ENSG00000213085 | 0.038553  | 0.458739 | 1 | 1 CCDC19           | -      |
| ENSG00000057704 | 0.038517  | 0.325308 | 1 | 1 TMCC3            | -      |
| ENSG00000236054 | 0.038517  | 0.325308 | 1 | 1 LL22NC03-104C7.1 | -      |
| ENSG00000264575 | 0.038517  | 0.325308 | 1 | 1 LINC00526        | -      |
| ENSG00000267073 | 0.038517  | 0.325308 | 1 | 1 AC005256.1       | -      |
| ENSG00000138271 | 0.038473  | 0.178289 | 1 | 1 GPR87            | K08389 |
| ENSG00000170458 | 0.038473  | 0.178289 | 1 | 1 CD14             | K04391 |
| ENSG00000178726 | 0.038473  | 0.178289 | 1 | 1 THBD             | K03907 |
| ENSG00000201678 | 0.038473  | 0.178289 | 1 | 1 Y_RNA            | -      |
| ENSG00000230667 | 0.038473  | 0.178289 | 1 | 1 SETSIP           | K11290 |
| ENSG00000231160 | 0.038473  | 0.178289 | 1 | 1 RP11-617D20.1    | -      |

|                 |          |           |   |                 |              |
|-----------------|----------|-----------|---|-----------------|--------------|
| ENSG00000248265 | 0.038473 | 0.178289  | 1 | 1 RP11-834C11.3 | -            |
| ENSG00000256050 | 0.038473 | 0.178289  | 1 | 1 RP11-982M15.6 | -            |
| ENSG00000109063 | 0.038417 | 0.014597  | 1 | 1 MYH3          | K10352       |
| ENSG00000182308 | 0.038417 | 0.014597  | 1 | 1 DCAF4L1       | K11799       |
| ENSG00000182327 | 0.038417 | 0.014597  | 1 | 1 GLTPD2        | -            |
| ENSG00000198035 | 0.038417 | 0.014597  | 1 | 1 AGAP9         | K12491       |
| ENSG00000205810 | 0.038417 | 0.014597  | 1 | 1 KLRC3         | K06541       |
| ENSG00000230082 | 0.038417 | 0.014597  | 1 | 1 PRRT3-AS1     | -            |
| ENSG00000236493 | 0.038417 | 0.014597  | 1 | 1 EIF2S2P3      | K03238       |
| ENSG00000255346 | 0.038417 | 0.014597  | 1 | 1 NOX5          | -            |
| ENSG00000256001 | 0.038417 | 0.014597  | 1 | 1 RP11-575F12.2 | -            |
| ENSG00000259732 | 0.038417 | 0.014597  | 1 | 1 RP11-59H7.3   | -            |
| ENSG00000260051 | 0.038417 | 0.014597  | 1 | 1 LA16c-390E6.4 | -            |
| ENSG00000267655 | 0.038417 | 0.014597  | 1 | 1 CTD-2286N8.2  | -            |
| ENSG00000269688 | 0.038417 | 0.014597  | 1 | 1 AC008982.2    | -            |
| ENSG00000272040 | 0.038417 | 0.014597  | 1 | 1 CTC-366B18.4  | -            |
| ENSG00000105877 | 0.038238 | -0.381773 | 1 | 1 DNAH11        | K10408       |
| ENSG00000106336 | 0.038238 | -0.381773 | 1 | 1 FBXO24        | K10304       |
| ENSG00000110203 | 0.038238 | -0.381773 | 1 | 1 FOLR3         | K13649       |
| ENSG00000115423 | 0.038238 | -0.381773 | 1 | 1 DNAH6         | K10408       |
| ENSG00000154479 | 0.038238 | -0.381773 | 1 | 1 CCDC173       | -            |
| ENSG00000163704 | 0.038238 | -0.381773 | 1 | 1 PRRT3         | -            |
| ENSG00000171224 | 0.038238 | -0.381773 | 1 | 1 C10orf35      | -            |
| ENSG00000171757 | 0.038238 | -0.381773 | 1 | 1 LRRC34        | -            |
| ENSG00000173926 | 0.038238 | -0.381773 | 1 | 1               | 3-Mar K10658 |
| ENSG00000188681 | 0.038238 | -0.381773 | 1 | 1 TEKT4P2       | K18631       |
| ENSG00000204540 | 0.038238 | -0.381773 | 1 | 1 PSORS1C1      | -            |
| ENSG00000228271 | 0.038238 | -0.381773 | 1 | 1 RP11-513G11.2 | -            |
| ENSG00000230658 | 0.038238 | -0.381773 | 1 | 1 KLHL7-AS1     | -            |
| ENSG00000235381 | 0.038238 | -0.381773 | 1 | 1 RP11-477D19.2 | -            |
| ENSG00000246792 | 0.038238 | -0.381773 | 1 | 1 RP11-68L18.1  | -            |
| ENSG00000248103 | 0.038238 | -0.381773 | 1 | 1 CTC-338M12.9  | -            |
| ENSG00000260742 | 0.038238 | -0.381773 | 1 | 1 RP11-366L5.1  | -            |
| ENSG00000260757 | 0.038238 | -0.381773 | 1 | 1 RP11-120K18.2 | -            |
| ENSG00000263050 | 0.038238 | -0.381773 | 1 | 1 RP11-667K14.3 | -            |
| ENSG00000264456 | 0.038238 | -0.381773 | 1 | 1 RP11-848P1.2  | -            |
| ENSG00000273148 | 0.038238 | -0.381773 | 1 | 1 RP5-1068E13.7 | -            |
| ENSG00000049089 | 0.038083 | -0.629953 | 1 | 1 COL9A2        | K08131       |
| ENSG00000081059 | 0.038083 | -0.629953 | 1 | 1 TCF7          | K02620       |
| ENSG00000108370 | 0.038083 | -0.629953 | 1 | 1 RGS9          | K13765       |
| ENSG00000108691 | 0.038083 | -0.629953 | 1 | 1 CCL2          | K14624       |
| ENSG00000119632 | 0.038083 | -0.629953 | 1 | 1 IFI27L2       | -            |
| ENSG00000134365 | 0.038083 | -0.629953 | 1 | 1 CFHR4         | K04004       |
| ENSG00000145041 | 0.038083 | -0.629953 | 1 | 1 VPRBP         | K11789       |
| ENSG00000145244 | 0.038083 | -0.629953 | 1 | 1 CORIN         | K09614       |
| ENSG00000148680 | 0.038083 | -0.629953 | 1 | 1 HTR7          | K04163       |
| ENSG00000154099 | 0.038083 | -0.629953 | 1 | 1 DNAAF1        | K19750       |
| ENSG00000165140 | 0.038083 | -0.629953 | 1 | 1 FBP1          | K03841       |
| ENSG00000166546 | 0.038083 | -0.629953 | 1 | 1 BEAN1         | K19324       |
| ENSG00000177984 | 0.038083 | -0.629953 | 1 | 1 LCN15         | -            |
| ENSG00000182257 | 0.038083 | -0.629953 | 1 | 1 C22orf26      | K12581       |
| ENSG00000186364 | 0.038083 | -0.629953 | 1 | 1 NUDT17        | -            |
| ENSG00000196371 | 0.038083 | -0.629953 | 1 | 1 FUT4          | K07632       |
| ENSG00000197093 | 0.038083 | -0.629953 | 1 | 1 GAL3ST4       | K09677       |
| ENSG00000225264 | 0.038083 | -0.629953 | 1 | 1 ZNRF2P2       | K10694       |
| ENSG00000230303 | 0.038083 | -0.629953 | 1 | 1 RP11-213G2.2  | -            |
| ENSG00000234043 | 0.038083 | -0.629953 | 1 | 1 RP11-56M3.1   | K13988       |
| ENSG00000236675 | 0.038083 | -0.629953 | 1 | 1 MTX1P1        | K17776       |



|                 |          |           |   |                    |        |
|-----------------|----------|-----------|---|--------------------|--------|
| ENSG00000236830 | 0.038083 | -0.629953 | 1 | 1 CBR3-AS1         | -      |
| ENSG00000236924 | 0.038083 | -0.629953 | 1 | 1 RP11-390F4.6     | -      |
| ENSG00000239407 | 0.038083 | -0.629953 | 1 | 1 LLOXNC01-237H1.2 | -      |
| ENSG00000240996 | 0.038083 | -0.629953 | 1 | 1 RP11-80H5.7      | -      |
| ENSG00000244459 | 0.038083 | -0.629953 | 1 | 1 RP11-1398P2.1    | -      |
| ENSG00000247081 | 0.038083 | -0.629953 | 1 | 1 RP11-318M2.2     | -      |
| ENSG00000249332 | 0.038083 | -0.629953 | 1 | 1 RP1-251I12.1     | -      |
| ENSG00000251611 | 0.038083 | -0.629953 | 1 | 1 RP11-610P16.1    | -      |
| ENSG00000251615 | 0.038083 | -0.629953 | 1 | 1 RP11-774O3.3     | -      |
| ENSG00000255200 | 0.038083 | -0.629953 | 1 | 1 AP003068.18      | K01834 |
| ENSG00000259953 | 0.038083 | -0.629953 | 1 | 1 RP11-4O1.2       | -      |
| ENSG00000266258 | 0.038083 | -0.629953 | 1 | 1 RP11-41O4.1      | -      |
| ENSG00000270580 | 0.038083 | -0.629953 | 1 | 1 RP11-1186N24.5   | -      |
| ENSG00000271452 | 0.038083 | -0.629953 | 1 | 1 RP11-342K6.2     | -      |
| ENSG00000272367 | 0.038083 | -0.629953 | 1 | 1 CTC-428H11.2     | -      |
| ENSG00000053438 | 0.037826 | -0.929792 | 1 | 1 NNAT             | -      |
| ENSG00000101342 | 0.037826 | -0.929792 | 1 | 1 TLDC2            | -      |
| ENSG00000111816 | 0.037826 | -0.929792 | 1 | 1 FRK              | K08892 |
| ENSG00000126583 | 0.037826 | -0.929792 | 1 | 1 PRKCG            | K19663 |
| ENSG00000132530 | 0.037826 | -0.929792 | 1 | 1 XAF1             | -      |
| ENSG00000154096 | 0.037826 | -0.929792 | 1 | 1 THY1             | K06514 |
| ENSG00000170161 | 0.037826 | -0.929792 | 1 | 1 RP11-262H14.4    | -      |
| ENSG00000177494 | 0.037826 | -0.929792 | 1 | 1 ZBED2            | K06517 |
| ENSG00000179673 | 0.037826 | -0.929792 | 1 | 1 RPRML            | K10128 |
| ENSG00000181227 | 0.037826 | -0.929792 | 1 | 1 RP4-682C21.2     | K00658 |
| ENSG00000181315 | 0.037826 | -0.929792 | 1 | 1 ZNF322           | -      |
| ENSG00000183248 | 0.037826 | -0.929792 | 1 | 1 CTD-3193O13.9    | -      |
| ENSG00000185495 | 0.037826 | -0.929792 | 1 | 1 RP11-504P24.4    | -      |
| ENSG00000188710 | 0.037826 | -0.929792 | 1 | 1 QRFP             | -      |
| ENSG00000196966 | 0.037826 | -0.929792 | 1 | 1 HIST1H3E         | K11253 |
| ENSG00000204019 | 0.037826 | -0.929792 | 1 | 1 CT83             | -      |
| ENSG00000205790 | 0.037826 | -0.929792 | 1 | 1 AC005594.3       | -      |
| ENSG00000212719 | 0.037826 | -0.929792 | 1 | 1 C17orf51         | K10408 |
| ENSG00000213492 | 0.037826 | -0.929792 | 1 | 1 NT5C3AP1         | K01081 |
| ENSG00000221845 | 0.037826 | -0.929792 | 1 | 1 C7orf65          | K04613 |
| ENSG00000226986 | 0.037826 | -0.929792 | 1 | 1 RP11-543B16.2    | -      |
| ENSG00000227073 | 0.037826 | -0.929792 | 1 | 1 SDHDP2           | K00237 |
| ENSG00000229021 | 0.037826 | -0.929792 | 1 | 1 NBPF18P          | -      |
| ENSG00000230701 | 0.037826 | -0.929792 | 1 | 1 FBXW4P1          | K10262 |
| ENSG00000232453 | 0.037826 | -0.929792 | 1 | 1 RP4-794H19.1     | -      |
| ENSG00000232872 | 0.037826 | -0.929792 | 1 | 1 CTAGE3P          | -      |
| ENSG00000235204 | 0.037826 | -0.929792 | 1 | 1 RP11-121A14.2    | -      |
| ENSG00000235748 | 0.037826 | -0.929792 | 1 | 1 RP11-32D17.4     | K16941 |
| ENSG00000236349 | 0.037826 | -0.929792 | 1 | 1 SUCLG2P2         | K01900 |
| ENSG00000236710 | 0.037826 | -0.929792 | 1 | 1 AC108448.2       | -      |
| ENSG00000237685 | 0.037826 | -0.929792 | 1 | 1 RP11-360O19.4    | -      |
| ENSG00000242852 | 0.037826 | -0.929792 | 1 | 1 ZNF709           | K09228 |
| ENSG00000250794 | 0.037826 | -0.929792 | 1 | 1 ALG1L12P         | K03842 |
| ENSG00000252412 | 0.037826 | -0.929792 | 1 | 1 Y_RNA            | -      |
| ENSG00000253540 | 0.037826 | -0.929792 | 1 | 1 FAM86HP          | K12354 |
| ENSG00000254461 | 0.037826 | -0.929792 | 1 | 1 RP11-755F10.3    | -      |
| ENSG00000254783 | 0.037826 | -0.929792 | 1 | 1 RP11-320L11.2    | -      |
| ENSG00000255182 | 0.037826 | -0.929792 | 1 | 1 CTD-2517M22.14   | -      |
| ENSG00000259582 | 0.037826 | -0.929792 | 1 | 1 RP11-461F11.3    | -      |
| ENSG00000259668 | 0.037826 | -0.929792 | 1 | 1 RP11-707P17.2    | -      |
| ENSG00000262180 | 0.037826 | -0.929792 | 1 | 1 OCLM             | -      |
| ENSG00000262951 | 0.037826 | -0.929792 | 1 | 1 RP11-670E13.2    | -      |
| ENSG00000264219 | 0.037826 | -0.929792 | 1 | 1 MIR4442          | -      |

|                 |          |           |   |                  |        |
|-----------------|----------|-----------|---|------------------|--------|
| ENSG00000265095 | 0.037826 | -0.929792 | 1 | 1 FTLP12         | -      |
| ENSG00000267414 | 0.037826 | -0.929792 | 1 | 1 RP11-456K23.1  | -      |
| ENSG00000267730 | 0.037826 | -0.929792 | 1 | 1 CTD-2537I9.5   | -      |
| ENSG00000267737 | 0.037826 | -0.929792 | 1 | 1 AC061992.2     | -      |
| ENSG00000268340 | 0.037826 | -0.929792 | 1 | 1 RP3-477O4.16   | -      |
| ENSG00000268812 | 0.037826 | -0.929792 | 1 | 1 RP1-102K2.8    | -      |
| ENSG00000269693 | 0.037826 | -0.929792 | 1 | 1 CTD-2192J16.20 | K09228 |
| ENSG00000271662 | 0.037826 | -0.929792 | 1 | 1 RP11-141C7.3   | K15425 |
| ENSG00000271927 | 0.037826 | -0.929792 | 1 | 1 CTD-2541M15.4  | -      |
| ENSG00000272172 | 0.037826 | -0.929792 | 1 | 1 RP13-582O9.7   | -      |
| ENSG00000010361 | 0.037324 | -1.308612 | 1 | 1 FUZ            | -      |
| ENSG00000028277 | 0.037324 | -1.308612 | 1 | 1 POU2F2         | K09364 |
| ENSG00000042062 | 0.037324 | -1.308612 | 1 | 1 FAM65C         | -      |
| ENSG00000047662 | 0.037324 | -1.308612 | 1 | 1 FAM184B        | K09228 |
| ENSG00000074966 | 0.037324 | -1.308612 | 1 | 1 TXK            | K08016 |
| ENSG00000088881 | 0.037324 | -1.308612 | 1 | 1 EBF4           | K09103 |
| ENSG00000095464 | 0.037324 | -1.308612 | 1 | 1 PDE6C          | K13757 |
| ENSG00000102003 | 0.037324 | -1.308612 | 1 | 1 SYP            | -      |
| ENSG00000104490 | 0.037324 | -1.308612 | 1 | 1 NCALD          | K19695 |
| ENSG00000106125 | 0.037324 | -1.308612 | 1 | 1 FAM188B        | K01875 |
| ENSG00000126903 | 0.037324 | -1.308612 | 1 | 1 SLC10A3        | K14343 |
| ENSG00000141696 | 0.037324 | -1.308612 | 1 | 1 LEPREL4        | -      |
| ENSG00000144488 | 0.037324 | -1.308612 | 1 | 1 ESPNL          | -      |
| ENSG00000157782 | 0.037324 | -1.308612 | 1 | 1 CABP1          | -      |
| ENSG00000160097 | 0.037324 | -1.308612 | 1 | 1 FNDC5          | -      |
| ENSG00000164619 | 0.037324 | -1.308612 | 1 | 1 BMPER          | -      |
| ENSG00000164621 | 0.037324 | -1.308612 | 1 | 1 SMAD5-AS1      | -      |
| ENSG00000165028 | 0.037324 | -1.308612 | 1 | 1 NIPSNAP3B      | -      |
| ENSG00000165188 | 0.037324 | -1.308612 | 1 | 1 RNF183         | -      |
| ENSG00000165935 | 0.037324 | -1.308612 | 1 | 1 SMCO2          | -      |
| ENSG00000167945 | 0.037324 | -1.308612 | 1 | 1 PRR25          | -      |
| ENSG00000168062 | 0.037324 | -1.308612 | 1 | 1 BATF2          | K09034 |
| ENSG00000171345 | 0.037324 | -1.308612 | 1 | 1 KRT19          | K07604 |
| ENSG00000171365 | 0.037324 | -1.308612 | 1 | 1 CLCN5          | K05012 |
| ENSG00000171916 | 0.037324 | -1.308612 | 1 | 1 LGALS9C        | K10093 |
| ENSG00000172789 | 0.037324 | -1.308612 | 1 | 1 HOXC5          | K09305 |
| ENSG00000174236 | 0.037324 | -1.308612 | 1 | 1 REP15          | -      |
| ENSG00000174326 | 0.037324 | -1.308612 | 1 | 1 SLC16A11       | K08188 |
| ENSG00000177340 | 0.037324 | -1.308612 | 1 | 1 AC024940.1     | -      |
| ENSG00000182217 | 0.037324 | -1.308612 | 1 | 1 HIST2H4B       | K11254 |
| ENSG00000184060 | 0.037324 | -1.308612 | 1 | 1 ADAP2          | -      |
| ENSG00000185666 | 0.037324 | -1.308612 | 1 | 1 SYN3           | -      |
| ENSG00000186340 | 0.037324 | -1.308612 | 1 | 1 THBS2          | K04659 |
| ENSG00000187151 | 0.037324 | -1.308612 | 1 | 1 ANGPTL5        | -      |
| ENSG00000187944 | 0.037324 | -1.308612 | 1 | 1 C2orf66        | -      |
| ENSG00000188385 | 0.037324 | -1.308612 | 1 | 1 JAKMIP3        | -      |
| ENSG00000196562 | 0.037324 | -1.308612 | 1 | 1 SULF2          | K14607 |
| ENSG00000197858 | 0.037324 | -1.308612 | 1 | 1 GPAA1          | K05289 |
| ENSG00000198658 | 0.037324 | -1.308612 | 1 | 1 ABHD17AP2      | -      |
| ENSG00000204584 | 0.037324 | -1.308612 | 1 | 1 RP11-304F15.3  | -      |
| ENSG00000207721 | 0.037324 | -1.308612 | 1 | 1 MIR186         | -      |
| ENSG00000213280 | 0.037324 | -1.308612 | 1 | 1 RP11-212P7.1   | K02947 |
| ENSG00000213809 | 0.037324 | -1.308612 | 1 | 1 KLRK1          | K06728 |
| ENSG00000224549 | 0.037324 | -1.308612 | 1 | 1 RP11-370B11.3  | -      |
| ENSG00000224956 | 0.037324 | -1.308612 | 1 | 1 RP11-206L10.1  | -      |
| ENSG00000225913 | 0.037324 | -1.308612 | 1 | 1 RP11-57C13.6   | -      |
| ENSG00000226239 | 0.037324 | -1.308612 | 1 | 1 RP1-310O13.7   | -      |
| ENSG00000226259 | 0.037324 | -1.308612 | 1 | 1 GTF2H2B        | K03142 |

|                 |           |           |   |                  |        |
|-----------------|-----------|-----------|---|------------------|--------|
| ENSG00000227492 | 0.037324  | -1.308612 | 1 | 1 RP11-316M21.6  | -      |
| ENSG00000227741 | 0.037324  | -1.308612 | 1 | 1 RP11-536C5.7   | -      |
| ENSG00000228212 | 0.037324  | -1.308612 | 1 | 1 OFD1P17        | K16480 |
| ENSG00000229325 | 0.037324  | -1.308612 | 1 | 1 ACAP2-IT1      | -      |
| ENSG00000229728 | 0.037324  | -1.308612 | 1 | 1 RP11-314N13.3  | -      |
| ENSG00000231167 | 0.037324  | -1.308612 | 1 | 1 YBX1P2         | K09276 |
| ENSG00000231940 | 0.037324  | -1.308612 | 1 | 1 RPS7P3         | K02993 |
| ENSG00000232013 | 0.037324  | -1.308612 | 1 | 1 AC107021.1     | -      |
| ENSG00000232725 | 0.037324  | -1.308612 | 1 | 1 U52111.14      | -      |
| ENSG00000233547 | 0.037324  | -1.308612 | 1 | 1 RP11-57H14.2   | -      |
| ENSG00000234740 | 0.037324  | -1.308612 | 1 | 1 RP11-272P10.2  | -      |
| ENSG00000234945 | 0.037324  | -1.308612 | 1 | 1 AC109828.1     | -      |
| ENSG00000235489 | 0.037324  | -1.308612 | 1 | 1 DBF4P1         | K06629 |
| ENSG00000236643 | 0.037324  | -1.308612 | 1 | 1 RP11-175D17.3  | -      |
| ENSG00000237821 | 0.037324  | -1.308612 | 1 | 1 AC083873.4     | K09560 |
| ENSG00000238924 | 0.037324  | -1.308612 | 1 | 1 RNU7-163P      | -      |
| ENSG00000241081 | 0.037324  | -1.308612 | 1 | 1 RP11-488C13.1  | K02891 |
| ENSG00000242288 | 0.037324  | -1.308612 | 1 | 1 RP11-464F9.1   | -      |
| ENSG00000242756 | 0.037324  | -1.308612 | 1 | 1 RHOT1P3        | K07870 |
| ENSG00000246090 | 0.037324  | -1.308612 | 1 | 1 RP11-696N14.1  | -      |
| ENSG00000246366 | 0.037324  | -1.308612 | 1 | 1 RP11-382J12.1  | -      |
| ENSG00000248187 | 0.037324  | -1.308612 | 1 | 1 RP11-184M15.1  | -      |
| ENSG00000248489 | 0.037324  | -1.308612 | 1 | 1 CTD-2007H13.3  | -      |
| ENSG00000248668 | 0.037324  | -1.308612 | 1 | 1 OXCT1-AS1      | -      |
| ENSG00000248791 | 0.037324  | -1.308612 | 1 | 1 CTD-2165H16.3  | -      |
| ENSG00000249755 | 0.037324  | -1.308612 | 1 | 1 RP11-466G12.2  | K06489 |
| ENSG00000249868 | 0.037324  | -1.308612 | 1 | 1 RP11-63E5.6    | -      |
| ENSG00000251279 | 0.037324  | -1.308612 | 1 | 1 CTC-436P18.1   | -      |
| ENSG00000253392 | 0.037324  | -1.308612 | 1 | 1 AC006277.2     | -      |
| ENSG00000255010 | 0.037324  | -1.308612 | 1 | 1 RP11-113K21.3  | -      |
| ENSG00000258028 | 0.037324  | -1.308612 | 1 | 1 RP11-148E17.1  | -      |
| ENSG00000258354 | 0.037324  | -1.308612 | 1 | 1 MIR3180-1      | -      |
| ENSG00000258654 | 0.037324  | -1.308612 | 1 | 1 RP11-509A17.3  | -      |
| ENSG00000258768 | 0.037324  | -1.308612 | 1 | 1 CTD-2292M16.8  | -      |
| ENSG00000259071 | 0.037324  | -1.308612 | 1 | 1 RP11-247L20.4  | -      |
| ENSG00000259726 | 0.037324  | -1.308612 | 1 | 1 CSPG4P11       | K08115 |
| ENSG00000259728 | 0.037324  | -1.308612 | 1 | 1 LINC00933      | -      |
| ENSG00000259895 | 0.037324  | -1.308612 | 1 | 1 RP11-715J22.2  | -      |
| ENSG00000260989 | 0.037324  | -1.308612 | 1 | 1 LA16c-395F10.2 | -      |
| ENSG00000261105 | 0.037324  | -1.308612 | 1 | 1 RP11-173B14.5  | -      |
| ENSG00000261267 | 0.037324  | -1.308612 | 1 | 1 RP11-44I10.3   | -      |
| ENSG00000264425 | 0.037324  | -1.308612 | 1 | 1 MIR4653        | -      |
| ENSG00000265683 | 0.037324  | -1.308612 | 1 | 1 RP11-173M1.5   | -      |
| ENSG00000266145 | 0.037324  | -1.308612 | 1 | 1 RHOT1P1        | K07870 |
| ENSG00000266313 | 0.037324  | -1.308612 | 1 | 1 RP11-173M1.4   | -      |
| ENSG00000267498 | 0.037324  | -1.308612 | 1 | 1 CTB-32O4.2     | -      |
| ENSG00000268593 | 0.037324  | -1.308612 | 1 | 1 CTD-2611O12.6  | -      |
| ENSG00000269894 | 0.037324  | -1.308612 | 1 | 1 RP11-1020A11.1 | -      |
| ENSG00000269967 | 0.037324  | -1.308612 | 1 | 1 RP11-84A19.4   | -      |
| ENSG00000270228 | 0.037324  | -1.308612 | 1 | 1 RP11-453E17.3  | K19759 |
| ENSG00000271551 | 0.037324  | -1.308612 | 1 | 1 RP11-230C9.2   | -      |
| ENSG00000271815 | 0.037324  | -1.308612 | 1 | 1 CTD-2235C13.3  | -      |
| ENSG00000271825 | 0.037324  | -1.308612 | 1 | 1 RP11-337N6.2   | -      |
| ENSG00000272017 | 0.037324  | -1.308612 | 1 | 1 RP1-199J3.7    | -      |
| ENSG00000272905 | 0.037324  | -1.308612 | 1 | 1 RP11-265E18.1  | -      |
| ENSG00000273254 | 0.037324  | -1.308612 | 1 | 1 RP1-100J12.1   | -      |
| ENSG00000273456 | 0.037324  | -1.308612 | 1 | 1 RP11-686O6.2   | -      |
| ENSG00000085224 | -0.036311 | 1.872531  | 1 | 1 ATRX           | K10779 |

|                 |          |          |   |                    |        |
|-----------------|----------|----------|---|--------------------|--------|
| ENSG00000017621 | 0.035895 | -1.82353 | 1 | 1 MAGIX            | K12581 |
| ENSG00000039987 | 0.035895 | -1.82353 | 1 | 1 BEST2            | K13879 |
| ENSG00000050628 | 0.035895 | -1.82353 | 1 | 1 PTGER3           | K04260 |
| ENSG00000064201 | 0.035895 | -1.82353 | 1 | 1 TSPAN32          | K17359 |
| ENSG00000072182 | 0.035895 | -1.82353 | 1 | 1 ASIC4            | K04831 |
| ENSG00000082074 | 0.035895 | -1.82353 | 1 | 1 FYB              | K17698 |
| ENSG00000085831 | 0.035895 | -1.82353 | 1 | 1 TTC39A           | -      |
| ENSG00000086730 | 0.035895 | -1.82353 | 1 | 1 LAT2             | -      |
| ENSG00000091137 | 0.035895 | -1.82353 | 1 | 1 SLC26A4          | K14702 |
| ENSG00000091536 | 0.035895 | -1.82353 | 1 | 1 MYO15A           | K10361 |
| ENSG00000092421 | 0.035895 | -1.82353 | 1 | 1 SEMA6A           | K06842 |
| ENSG00000099960 | 0.035895 | -1.82353 | 1 | 1 SLC7A4           | K13866 |
| ENSG00000100276 | 0.035895 | -1.82353 | 1 | 1 RASL10A          | K07850 |
| ENSG00000100739 | 0.035895 | -1.82353 | 1 | 1 BDKRB1           | K03915 |
| ENSG00000101440 | 0.035895 | -1.82353 | 1 | 1 ASIP             | K08725 |
| ENSG00000101850 | 0.035895 | -1.82353 | 1 | 1 GPR143           | K08470 |
| ENSG00000102218 | 0.035895 | -1.82353 | 1 | 1 RP2              | K18272 |
| ENSG00000105251 | 0.035895 | -1.82353 | 1 | 1 SHD              | -      |
| ENSG00000106384 | 0.035895 | -1.82353 | 1 | 1 MOGAT3           | K14456 |
| ENSG00000106624 | 0.035895 | -1.82353 | 1 | 1 AEBP1            | -      |
| ENSG00000109072 | 0.035895 | -1.82353 | 1 | 1 VTN              | K06251 |
| ENSG00000111215 | 0.035895 | -1.82353 | 1 | 1 PRR4             | K08474 |
| ENSG00000111339 | 0.035895 | -1.82353 | 1 | 1 ART4             | K06717 |
| ENSG00000111644 | 0.035895 | -1.82353 | 1 | 1 ACRBP            | -      |
| ENSG00000118307 | 0.035895 | -1.82353 | 1 | 1 CASC1            | K17580 |
| ENSG00000122986 | 0.035895 | -1.82353 | 1 | 1 HVCN1            | -      |
| ENSG00000125462 | 0.035895 | -1.82353 | 1 | 1 C1orf61          | -      |
| ENSG00000128218 | 0.035895 | -1.82353 | 1 | 1 VPRESB3          | K06553 |
| ENSG00000130287 | 0.035895 | -1.82353 | 1 | 1 NCAN             | K06794 |
| ENSG00000133067 | 0.035895 | -1.82353 | 1 | 1 LGR6             | K08399 |
| ENSG00000134258 | 0.035895 | -1.82353 | 1 | 1 VTCN1            | K06747 |
| ENSG00000135218 | 0.035895 | -1.82353 | 1 | 1 CD36             | K06259 |
| ENSG00000136881 | 0.035895 | -1.82353 | 1 | 1 BAAT             | K00659 |
| ENSG00000137098 | 0.035895 | -1.82353 | 1 | 1 SPAG8            | -      |
| ENSG00000137976 | 0.035895 | -1.82353 | 1 | 1 DNASE2B          | K01158 |
| ENSG00000138798 | 0.035895 | -1.82353 | 1 | 1 EGF              | K04357 |
| ENSG00000141294 | 0.035895 | -1.82353 | 1 | 1 LRRC46           | -      |
| ENSG00000141579 | 0.035895 | -1.82353 | 1 | 1 ZNF750           | -      |
| ENSG00000143107 | 0.035895 | -1.82353 | 1 | 1 FNDC7            | -      |
| ENSG00000143632 | 0.035895 | -1.82353 | 1 | 1 ACTA1            | K10354 |
| ENSG00000146243 | 0.035895 | -1.82353 | 1 | 1 IRAK1BP1         | K17776 |
| ENSG00000150076 | 0.035895 | -1.82353 | 1 | 1 C10ORF68         | -      |
| ENSG00000150768 | 0.035895 | -1.82353 | 1 | 1 DLAT             | K00627 |
| ENSG00000152495 | 0.035895 | -1.82353 | 1 | 1 CAMK4            | K05869 |
| ENSG00000157833 | 0.035895 | -1.82353 | 1 | 1 GAREML           | -      |
| ENSG00000161132 | 0.035895 | -1.82353 | 1 | 1 XXbac-B444P24.10 | K00318 |
| ENSG00000161281 | 0.035895 | -1.82353 | 1 | 1 COX7A1           | K02270 |
| ENSG00000161929 | 0.035895 | -1.82353 | 1 | 1 SCIMP            | -      |
| ENSG00000162399 | 0.035895 | -1.82353 | 1 | 1 BSND             | K19331 |
| ENSG00000166394 | 0.035895 | -1.82353 | 1 | 1 CYB5R2           | K00326 |
| ENSG00000167077 | 0.035895 | -1.82353 | 1 | 1 MEI1             | -      |
| ENSG00000167244 | 0.035895 | -1.82353 | 1 | 1 IGF2             | K13769 |
| ENSG00000170092 | 0.035895 | -1.82353 | 1 | 1 AC018720.10      | K08694 |
| ENSG00000170476 | 0.035895 | -1.82353 | 1 | 1 MZB1             | -      |
| ENSG00000172650 | 0.035895 | -1.82353 | 1 | 1 AGAP5            | K12491 |
| ENSG00000173193 | 0.035895 | -1.82353 | 1 | 1 PARP14           | K15261 |
| ENSG00000173662 | 0.035895 | -1.82353 | 1 | 1 TAS1R1           | K04624 |
| ENSG00000173867 | 0.035895 | -1.82353 | 1 | 1 RP11-97O12.7     | -      |

|                 |          |          |   |                 |        |
|-----------------|----------|----------|---|-----------------|--------|
| ENSG00000174196 | 0.035895 | -1.82353 | 1 | 1 FAM21D        | K18462 |
| ENSG00000174225 | 0.035895 | -1.82353 | 1 | 1 ARL13A        | K07961 |
| ENSG00000174837 | 0.035895 | -1.82353 | 1 | 1 EMR1          | K04591 |
| ENSG00000176428 | 0.035895 | -1.82353 | 1 | 1 VPS37D        | K12185 |
| ENSG00000177363 | 0.035895 | -1.82353 | 1 | 1 LRRN4CL       | K17985 |
| ENSG00000177757 | 0.035895 | -1.82353 | 1 | 1 FAM87B        | -      |
| ENSG00000178440 | 0.035895 | -1.82353 | 1 | 1 LINC00843     | -      |
| ENSG00000178715 | 0.035895 | -1.82353 | 1 | 1 RP11-169K16.8 | K02960 |
| ENSG00000179066 | 0.035895 | -1.82353 | 1 | 1 AC020907.1    | -      |
| ENSG00000179136 | 0.035895 | -1.82353 | 1 | 1 LINC00670     | -      |
| ENSG00000179909 | 0.035895 | -1.82353 | 1 | 1 ZNF154        | K09228 |
| ENSG00000180422 | 0.035895 | -1.82353 | 1 | 1 LINC00304     | -      |
| ENSG00000180638 | 0.035895 | -1.82353 | 1 | 1 SLC47A2       | K03327 |
| ENSG00000182909 | 0.035895 | -1.82353 | 1 | 1 LENG9         | -      |
| ENSG00000183307 | 0.035895 | -1.82353 | 1 | 1 CECR6         | -      |
| ENSG00000183423 | 0.035895 | -1.82353 | 1 | 1 LRIT3         | K09537 |
| ENSG00000184319 | 0.035895 | -1.82353 | 1 | 1 RPL23AP82     | K02893 |
| ENSG00000184368 | 0.035895 | -1.82353 | 1 | 1 MAP7D2        | -      |
| ENSG00000184619 | 0.035895 | -1.82353 | 1 | 1 KRBA2         | K15696 |
| ENSG00000185988 | 0.035895 | -1.82353 | 1 | 1 PLK5          | K19596 |
| ENSG00000186645 | 0.035895 | -1.82353 | 1 | 1 SPDYE9P       | K08694 |
| ENSG00000186676 | 0.035895 | -1.82353 | 1 | 1 EEF1GP1       | K03233 |
| ENSG00000186952 | 0.035895 | -1.82353 | 1 | 1 TMEM232       | -      |
| ENSG00000188051 | 0.035895 | -1.82353 | 1 | 1 TMEM221       | -      |
| ENSG00000188338 | 0.035895 | -1.82353 | 1 | 1 SLC38A3       | -      |
| ENSG00000188611 | 0.035895 | -1.82353 | 1 | 1 ASAH2         | K12349 |
| ENSG00000188992 | 0.035895 | -1.82353 | 1 | 1 LIPI          | K19404 |
| ENSG00000189157 | 0.035895 | -1.82353 | 1 | 1 FAM47E        | K08857 |
| ENSG00000189233 | 0.035895 | -1.82353 | 1 | 1 NUGGC         | K11447 |
| ENSG00000196963 | 0.035895 | -1.82353 | 1 | 1 PCDHB16       | K16494 |
| ENSG00000197808 | 0.035895 | -1.82353 | 1 | 1 ZNF461        | K09228 |
| ENSG00000198553 | 0.035895 | -1.82353 | 1 | 1 KCNRG         | -      |
| ENSG00000199787 | 0.035895 | -1.82353 | 1 | 1 SNORA42       | -      |
| ENSG00000199836 | 0.035895 | -1.82353 | 1 | 1 RNU1-47P      | -      |
| ENSG00000199906 | 0.035895 | -1.82353 | 1 | 1 RNU5B-2P      | -      |
| ENSG00000200419 | 0.035895 | -1.82353 | 1 | 1 Y_RNA         | -      |
| ENSG00000200488 | 0.035895 | -1.82353 | 1 | 1 RN7SKP203     | -      |
| ENSG00000200693 | 0.035895 | -1.82353 | 1 | 1 U3            | -      |
| ENSG00000202259 | 0.035895 | -1.82353 | 1 | 1 RNU6-1318P    | -      |
| ENSG00000202399 | 0.035895 | -1.82353 | 1 | 1 Y_RNA         | -      |
| ENSG00000203602 | 0.035895 | -1.82353 | 1 | 1 AL137059.1    | K09191 |
| ENSG00000203799 | 0.035895 | -1.82353 | 1 | 1 CCDC162P      | -      |
| ENSG00000203804 | 0.035895 | -1.82353 | 1 | 1 ADAMTSL4-AS1  | -      |
| ENSG00000203811 | 0.035895 | -1.82353 | 1 | 1 HIST2H3C      | K11253 |
| ENSG00000204876 | 0.035895 | -1.82353 | 1 | 1 AC021218.2    | -      |
| ENSG00000205281 | 0.035895 | -1.82353 | 1 | 1 GOLGA6L10     | K10595 |
| ENSG00000205325 | 0.035895 | -1.82353 | 1 | 1 AC005863.1    | -      |
| ENSG00000205663 | 0.035895 | -1.82353 | 1 | 1 RP11-706O15.5 | -      |
| ENSG00000205794 | 0.035895 | -1.82353 | 1 | 1 RP11-333E13.4 | K17360 |
| ENSG00000206601 | 0.035895 | -1.82353 | 1 | 1 RNU6-431P     | -      |
| ENSG00000207563 | 0.035895 | -1.82353 | 1 | 1 MIR23B        | -      |
| ENSG00000207575 | 0.035895 | -1.82353 | 1 | 1 MIR649        | -      |
| ENSG00000211961 | 0.035895 | -1.82353 | 1 | 1 IGHV1-45      | K06856 |
| ENSG00000212588 | 0.035895 | -1.82353 | 1 | 1 SNORA26       | -      |
| ENSG00000213061 | 0.035895 | -1.82353 | 1 | 1 PFN1P11       | K05759 |
| ENSG00000213557 | 0.035895 | -1.82353 | 1 | 1 RP11-240E2.2  | K02910 |
| ENSG00000213717 | 0.035895 | -1.82353 | 1 | 1 AC004692.5    | K02882 |
| ENSG00000214239 | 0.035895 | -1.82353 | 1 | 1 AL591025.1    | -      |

|                 |          |          |   |                    |        |
|-----------------|----------|----------|---|--------------------|--------|
| ENSG00000215221 | 0.035895 | -1.82353 | 1 | 1 UBA52P6          | K02927 |
| ENSG00000215749 | 0.035895 | -1.82353 | 1 | 1 GOLGA6L18        | K10595 |
| ENSG00000221571 | 0.035895 | -1.82353 | 1 | 1 RNU6ATAC35P      | -      |
| ENSG00000222345 | 0.035895 | -1.82353 | 1 | 1 SNORD19          | -      |
| ENSG00000223473 | 0.035895 | -1.82353 | 1 | 1 GS1-124K5.3      | -      |
| ENSG00000223652 | 0.035895 | -1.82353 | 1 | 1 AC106786.1       | -      |
| ENSG00000223695 | 0.035895 | -1.82353 | 1 | 1 RP4-633O19__A.1  | -      |
| ENSG00000224294 | 0.035895 | -1.82353 | 1 | 1 RP3-326I13.1     | -      |
| ENSG00000224462 | 0.035895 | -1.82353 | 1 | 1 C4BPAP1          | K04002 |
| ENSG00000224646 | 0.035895 | -1.82353 | 1 | 1 AC007387.2       | K02979 |
| ENSG00000224712 | 0.035895 | -1.82353 | 1 | 1 NPIPA3           | K01896 |
| ENSG00000224722 | 0.035895 | -1.82353 | 1 | 1 PRNCR1           | K13171 |
| ENSG00000225273 | 0.035895 | -1.82353 | 1 | 1 UBE2Q2P2         | K10582 |
| ENSG00000225526 | 0.035895 | -1.82353 | 1 | 1 C3orf83          | K09228 |
| ENSG00000225762 | 0.035895 | -1.82353 | 1 | 1 RP11-511I2.2     | -      |
| ENSG00000225833 | 0.035895 | -1.82353 | 1 | 1 GS1-594A7.3      | -      |
| ENSG00000225981 | 0.035895 | -1.82353 | 1 | 1 AC102953.4       | -      |
| ENSG00000226432 | 0.035895 | -1.82353 | 1 | 1 CTD-2015B23.2    | -      |
| ENSG00000226445 | 0.035895 | -1.82353 | 1 | 1 XXyac-YX65C7_A.1 | -      |
| ENSG00000226496 | 0.035895 | -1.82353 | 1 | 1 LINC00323        | -      |
| ENSG00000226609 | 0.035895 | -1.82353 | 1 | 1 RP11-276E15.4    | -      |
| ENSG00000226647 | 0.035895 | -1.82353 | 1 | 1 RP11-336A10.2    | -      |
| ENSG00000226756 | 0.035895 | -1.82353 | 1 | 1 AC007365.3       | -      |
| ENSG00000226981 | 0.035895 | -1.82353 | 1 | 1 ABHD17AP6        | -      |
| ENSG00000227359 | 0.035895 | -1.82353 | 1 | 1 AC017074.2       | -      |
| ENSG00000227740 | 0.035895 | -1.82353 | 1 | 1 RP11-318C24.2    | -      |
| ENSG00000227954 | 0.035895 | -1.82353 | 1 | 1 RP3-323P13.2     | -      |
| ENSG00000228007 | 0.035895 | -1.82353 | 1 | 1 AC011933.2       | K02929 |
| ENSG00000228049 | 0.035895 | -1.82353 | 1 | 1 POLR2J2          | K03008 |
| ENSG00000228050 | 0.035895 | -1.82353 | 1 | 1 TOP3BP1          | K03165 |
| ENSG00000228328 | 0.035895 | -1.82353 | 1 | 1 RP11-516A11.1    | K00927 |
| ENSG00000228352 | 0.035895 | -1.82353 | 1 | 1 RP11-537H15.3    | -      |
| ENSG00000228496 | 0.035895 | -1.82353 | 1 | 1 AC106875.1       | -      |
| ENSG00000228653 | 0.035895 | -1.82353 | 1 | 1 HNRNPCP7         | K12884 |
| ENSG00000228695 | 0.035895 | -1.82353 | 1 | 1 CES1P1           | K01044 |
| ENSG00000229111 | 0.035895 | -1.82353 | 1 | 1 MED4-AS1         | -      |
| ENSG00000230102 | 0.035895 | -1.82353 | 1 | 1 RP11-407B7.1     | -      |
| ENSG00000230146 | 0.035895 | -1.82353 | 1 | 1 SEPHS1P4         | K01008 |
| ENSG00000230568 | 0.035895 | -1.82353 | 1 | 1 SF3A3P1          | K12827 |
| ENSG00000230731 | 0.035895 | -1.82353 | 1 | 1 RP11-478K15.6    | -      |
| ENSG00000230982 | 0.035895 | -1.82353 | 1 | 1 DSTNP1           | K10363 |
| ENSG00000231296 | 0.035895 | -1.82353 | 1 | 1 RP1-39G22.4      | K07179 |
| ENSG00000231409 | 0.035895 | -1.82353 | 1 | 1 RP11-83J16.1     | K02929 |
| ENSG00000231527 | 0.035895 | -1.82353 | 1 | 1 RP11-374M1.2     | -      |
| ENSG00000231579 | 0.035895 | -1.82353 | 1 | 1 RPL7P21          | -      |
| ENSG00000231616 | 0.035895 | -1.82353 | 1 | 1 RP11-575L7.4     | -      |
| ENSG00000231793 | 0.035895 | -1.82353 | 1 | 1 DOC2GP           | K18665 |
| ENSG00000231878 | 0.035895 | -1.82353 | 1 | 1 SNRPFP1          | K11098 |
| ENSG00000231927 | 0.035895 | -1.82353 | 1 | 1 AC102953.6       | -      |
| ENSG00000232028 | 0.035895 | -1.82353 | 1 | 1 AC007391.2       | -      |
| ENSG00000232065 | 0.035895 | -1.82353 | 1 | 1 LINC01063        | -      |
| ENSG00000232385 | 0.035895 | -1.82353 | 1 | 1 RPS3AP25         | K02984 |
| ENSG00000232412 | 0.035895 | -1.82353 | 1 | 1 RP1-315G1.3      | -      |
| ENSG00000232564 | 0.035895 | -1.82353 | 1 | 1 RP4-591N18.2     | -      |
| ENSG00000232656 | 0.035895 | -1.82353 | 1 | 1 IDI2-AS1         | -      |
| ENSG00000232912 | 0.035895 | -1.82353 | 1 | 1 RP5-1115A15.1    | -      |
| ENSG00000233360 | 0.035895 | -1.82353 | 1 | 1 Z83844.1         | -      |
| ENSG00000233367 | 0.035895 | -1.82353 | 1 | 1 RP11-307L3.4     | -      |

|                 |          |          |   |                    |        |
|-----------------|----------|----------|---|--------------------|--------|
| ENSG00000233404 | 0.035895 | -1.82353 | 1 | 1 FLJ20373         | -      |
| ENSG00000233406 | 0.035895 | -1.82353 | 1 | 1 RP11-296A18.5    | K02981 |
| ENSG00000233806 | 0.035895 | -1.82353 | 1 | 1 AC131097.3       | -      |
| ENSG00000233846 | 0.035895 | -1.82353 | 1 | 1 RP11-307L3.2     | -      |
| ENSG00000234118 | 0.035895 | -1.82353 | 1 | 1 RPL13AP6         | K02872 |
| ENSG00000234338 | 0.035895 | -1.82353 | 1 | 1 RP11-797H7.1     | -      |
| ENSG00000234478 | 0.035895 | -1.82353 | 1 | 1 RP11-275I14.4    | -      |
| ENSG00000234500 | 0.035895 | -1.82353 | 1 | 1 GS1-124K5.10     | K03121 |
| ENSG00000234509 | 0.035895 | -1.82353 | 1 | 1 AP000253.1       | -      |
| ENSG00000234546 | 0.035895 | -1.82353 | 1 | 1 RP3-510D11.2     | -      |
| ENSG00000234871 | 0.035895 | -1.82353 | 1 | 1 LINC01032        | -      |
| ENSG00000234913 | 0.035895 | -1.82353 | 1 | 1 XXbac-B476C20.13 | -      |
| ENSG00000235172 | 0.035895 | -1.82353 | 1 | 1 CTB-114C7.3      | -      |
| ENSG00000235214 | 0.035895 | -1.82353 | 1 | 1 FAM83C-AS1       | -      |
| ENSG00000235554 | 0.035895 | -1.82353 | 1 | 1 AC005822.1       | K12893 |
| ENSG00000235586 | 0.035895 | -1.82353 | 1 | 1 AC011247.3       | -      |
| ENSG00000235698 | 0.035895 | -1.82353 | 1 | 1 PA2G4P2          | -      |
| ENSG00000236018 | 0.035895 | -1.82353 | 1 | 1 RP4-814D15.1     | K14012 |
| ENSG00000236213 | 0.035895 | -1.82353 | 1 | 1 AC006369.2       | -      |
| ENSG00000236425 | 0.035895 | -1.82353 | 1 | 1 AC090018.1       | K02910 |
| ENSG00000236654 | 0.035895 | -1.82353 | 1 | 1 AC079780.3       | -      |
| ENSG00000236699 | 0.035895 | -1.82353 | 1 | 1 ARHGEF38         | -      |
| ENSG00000236761 | 0.035895 | -1.82353 | 1 | 1 CTAGE9           | -      |
| ENSG00000236867 | 0.035895 | -1.82353 | 1 | 1 RP3-522J7.5      | K04695 |
| ENSG00000237292 | 0.035895 | -1.82353 | 1 | 1 RP11-540K16.1    | -      |
| ENSG00000237489 | 0.035895 | -1.82353 | 1 | 1 LINC00959        | -      |
| ENSG00000237737 | 0.035895 | -1.82353 | 1 | 1 DCTN1-AS1        | -      |
| ENSG00000237786 | 0.035895 | -1.82353 | 1 | 1 GFOD1-AS1        | -      |
| ENSG00000237916 | 0.035895 | -1.82353 | 1 | 1 RP11-537E18.1    | K02922 |
| ENSG00000238061 | 0.035895 | -1.82353 | 1 | 1 RP4-635A23.4     | K03038 |
| ENSG00000238269 | 0.035895 | -1.82353 | 1 | 1 PAGE2B           | -      |
| ENSG00000238390 | 0.035895 | -1.82353 | 1 | 1 SNORA81          | -      |
| ENSG00000238406 | 0.035895 | -1.82353 | 1 | 1 RNU7-171P        | -      |
| ENSG00000238821 | 0.035895 | -1.82353 | 1 | 1 snoU13           | -      |
| ENSG00000240509 | 0.035895 | -1.82353 | 1 | 1 RPL34P18         | K02915 |
| ENSG00000240898 | 0.035895 | -1.82353 | 1 | 1 RP11-48B14.1     | K02889 |
| ENSG00000241146 | 0.035895 | -1.82353 | 1 | 1 RPL7P41          | K02937 |
| ENSG00000241544 | 0.035895 | -1.82353 | 1 | 1 RP11-6F2.5       | -      |
| ENSG00000242837 | 0.035895 | -1.82353 | 1 | 1 RPL21P13         | K02889 |
| ENSG00000243071 | 0.035895 | -1.82353 | 1 | 1 RP11-613M5.2     | K02889 |
| ENSG00000243709 | 0.035895 | -1.82353 | 1 | 1 LEFTY1           | K04668 |
| ENSG00000243738 | 0.035895 | -1.82353 | 1 | 1 RN7SL181P        | -      |
| ENSG00000244073 | 0.035895 | -1.82353 | 1 | 1 RPS4XP6          | K02987 |
| ENSG00000245750 | 0.035895 | -1.82353 | 1 | 1 RP11-279F6.1     | -      |
| ENSG00000246130 | 0.035895 | -1.82353 | 1 | 1 RP11-875O11.2    | -      |
| ENSG00000246145 | 0.035895 | -1.82353 | 1 | 1 RP11-346I3.4     | -      |
| ENSG00000246851 | 0.035895 | -1.82353 | 1 | 1 RP11-544A12.8    | -      |
| ENSG00000247011 | 0.035895 | -1.82353 | 1 | 1 RP11-700H6.1     | -      |
| ENSG00000247877 | 0.035895 | -1.82353 | 1 | 1 CTD-2001C12.1    | -      |
| ENSG00000248751 | 0.035895 | -1.82353 | 1 | 1 RP1-130H16.18    | -      |
| ENSG00000248773 | 0.035895 | -1.82353 | 1 | 1 RP11-231L11.3    | -      |
| ENSG00000249476 | 0.035895 | -1.82353 | 1 | 1 CTD-2587M2.1     | -      |
| ENSG00000249679 | 0.035895 | -1.82353 | 1 | 1 RP11-279O9.4     | -      |
| ENSG00000250240 | 0.035895 | -1.82353 | 1 | 1 CTD-2154I11.2    | -      |
| ENSG00000250551 | 0.035895 | -1.82353 | 1 | 1 RP11-254I22.1    | -      |
| ENSG00000250722 | 0.035895 | -1.82353 | 1 | 1 SEPP1            | -      |
| ENSG00000250909 | 0.035895 | -1.82353 | 1 | 1 RP11-843P14.2    | -      |
| ENSG00000251175 | 0.035895 | -1.82353 | 1 | 1 RP11-45L9.1      | -      |

|                 |          |          |   |                  |        |
|-----------------|----------|----------|---|------------------|--------|
| ENSG00000251303 | 0.035895 | -1.82353 | 1 | 1 CTD-2003D5.1   | K08272 |
| ENSG00000251666 | 0.035895 | -1.82353 | 1 | 1 ZNF346-IT1     | --     |
| ENSG00000251733 | 0.035895 | -1.82353 | 1 | 1 SCARNA8        | --     |
| ENSG00000251957 | 0.035895 | -1.82353 | 1 | 1 RNU6-1095P     | --     |
| ENSG00000253167 | 0.035895 | -1.82353 | 1 | 1 KIAA0196-AS1   | --     |
| ENSG00000253438 | 0.035895 | -1.82353 | 1 | 1 PCAT1          | --     |
| ENSG00000253541 | 0.035895 | -1.82353 | 1 | 1 SEPT10P1       | K16940 |
| ENSG00000253633 | 0.035895 | -1.82353 | 1 | 1 KB-1980E6.3    | --     |
| ENSG00000253921 | 0.035895 | -1.82353 | 1 | 1 CTB-113P19.3   | --     |
| ENSG00000253944 | 0.035895 | -1.82353 | 1 | 1 RP11-156K13.1  | --     |
| ENSG00000254016 | 0.035895 | -1.82353 | 1 | 1 ALG1L10P       | K03842 |
| ENSG00000254363 | 0.035895 | -1.82353 | 1 | 1 CTB-131B5.5    | --     |
| ENSG00000254388 | 0.035895 | -1.82353 | 1 | 1 DUTP2          | --     |
| ENSG00000254732 | 0.035895 | -1.82353 | 1 | 1 RP11-691N7.6   | K05690 |
| ENSG00000254759 | 0.035895 | -1.82353 | 1 | 1 NAP1L1P1       | K11279 |
| ENSG00000254788 | 0.035895 | -1.82353 | 1 | 1 CKLF-CMTM1     | --     |
| ENSG00000254905 | 0.035895 | -1.82353 | 1 | 1 RP11-712L6.7   | --     |
| ENSG00000254907 | 0.035895 | -1.82353 | 1 | 1 RP11-484D2.2   | --     |
| ENSG00000255045 | 0.035895 | -1.82353 | 1 | 1 RP11-677M14.2  | --     |
| ENSG00000255440 | 0.035895 | -1.82353 | 1 | 1 RP11-632K5.2   | --     |
| ENSG00000255710 | 0.035895 | -1.82353 | 1 | 1 RP11-667M19.9  | K18329 |
| ENSG00000255974 | 0.035895 | -1.82353 | 1 | 1 CYP2A6         | K17683 |
| ENSG00000256097 | 0.035895 | -1.82353 | 1 | 1 LINC00696      | --     |
| ENSG00000256481 | 0.035895 | -1.82353 | 1 | 1 RP11-21A7A.4   | --     |
| ENSG00000256604 | 0.035895 | -1.82353 | 1 | 1 AC093668.2     | --     |
| ENSG00000256616 | 0.035895 | -1.82353 | 1 | 1 RP11-815J4.6   | K08462 |
| ENSG00000256843 | 0.035895 | -1.82353 | 1 | 1 RP11-467L13.4  | K14965 |
| ENSG00000256968 | 0.035895 | -1.82353 | 1 | 1 SNRPEP2        | K11097 |
| ENSG00000257327 | 0.035895 | -1.82353 | 1 | 1 RP11-650K20.3  | --     |
| ENSG00000257475 | 0.035895 | -1.82353 | 1 | 1 RP11-983P16.2  | --     |
| ENSG00000257595 | 0.035895 | -1.82353 | 1 | 1 RP3-473L9.4    | --     |
| ENSG00000257957 | 0.035895 | -1.82353 | 1 | 1 QRSL1P3        | K02433 |
| ENSG00000258099 | 0.035895 | -1.82353 | 1 | 1 RP11-686G8.2   | --     |
| ENSG00000258285 | 0.035895 | -1.82353 | 1 | 1 RP11-103B5.2   | --     |
| ENSG00000258711 | 0.035895 | -1.82353 | 1 | 1 RP11-218E20.3  | --     |
| ENSG00000258725 | 0.035895 | -1.82353 | 1 | 1 PRC1-AS1       | --     |
| ENSG00000258813 | 0.035895 | -1.82353 | 1 | 1 RP11-109N23.4  | --     |
| ENSG00000259091 | 0.035895 | -1.82353 | 1 | 1 LINC00517      | --     |
| ENSG00000259158 | 0.035895 | -1.82353 | 1 | 1 ADAM20P1       | --     |
| ENSG00000259251 | 0.035895 | -1.82353 | 1 | 1 RP11-643M14.1  | --     |
| ENSG00000259318 | 0.035895 | -1.82353 | 1 | 1 RP11-454L9.2   | K11299 |
| ENSG00000259408 | 0.035895 | -1.82353 | 1 | 1 RP11-3D4.3     | --     |
| ENSG00000259516 | 0.035895 | -1.82353 | 1 | 1 ANP32AP1       | K18646 |
| ENSG00000259595 | 0.035895 | -1.82353 | 1 | 1 RP11-516C1.1   | --     |
| ENSG00000259894 | 0.035895 | -1.82353 | 1 | 1 RP11-697E2.4   | --     |
| ENSG00000260144 | 0.035895 | -1.82353 | 1 | 1 RP11-361M10.3  | K10595 |
| ENSG00000260145 | 0.035895 | -1.82353 | 1 | 1 RP11-322D14.2  | --     |
| ENSG00000260170 | 0.035895 | -1.82353 | 1 | 1 RP11-96O20.4   | K17218 |
| ENSG00000260284 | 0.035895 | -1.82353 | 1 | 1 TPSP2          | --     |
| ENSG00000260342 | 0.035895 | -1.82353 | 1 | 1 RP11-1035H13.3 | K02957 |
| ENSG00000260352 | 0.035895 | -1.82353 | 1 | 1 CTD-2288F12.1  | --     |
| ENSG00000260372 | 0.035895 | -1.82353 | 1 | 1 AQP4-AS1       | --     |
| ENSG00000260382 | 0.035895 | -1.82353 | 1 | 1 RP11-540B6.2   | --     |
| ENSG00000260571 | 0.035895 | -1.82353 | 1 | 1 RP11-546B15.2  | K15464 |
| ENSG00000260773 | 0.035895 | -1.82353 | 1 | 1 RP11-352G18.2  | --     |
| ENSG00000260792 | 0.035895 | -1.82353 | 1 | 1 RP11-982M15.8  | --     |
| ENSG00000260855 | 0.035895 | -1.82353 | 1 | 1 RP11-439E19.10 | --     |
| ENSG00000260955 | 0.035895 | -1.82353 | 1 | 1 RP11-30L15.6   | --     |



|                 |          |          |   |                  |        |
|-----------------|----------|----------|---|------------------|--------|
| ENSG00000261156 | 0.035895 | -1.82353 | 1 | 1 RP11-215E13.1  | --     |
| ENSG00000261430 | 0.035895 | -1.82353 | 1 | 1 LA16c-390E6.3  | --     |
| ENSG00000261596 | 0.035895 | -1.82353 | 1 | 1 CTB-31N19.3    | --     |
| ENSG00000261613 | 0.035895 | -1.82353 | 1 | 1 RP11-20I23.13  | --     |
| ENSG00000261668 | 0.035895 | -1.82353 | 1 | 1 RP11-50D9.3    | --     |
| ENSG00000261915 | 0.035895 | -1.82353 | 1 | 1 RP11-542C16.2  | K15307 |
| ENSG00000261924 | 0.035895 | -1.82353 | 1 | 1 CTD-2561B21.5  | --     |
| ENSG00000262663 | 0.035895 | -1.82353 | 1 | 1 RP11-497H17.1  | --     |
| ENSG00000262833 | 0.035895 | -1.82353 | 1 | 1 RP11-28G8.1    | --     |
| ENSG00000263307 | 0.035895 | -1.82353 | 1 | 1 RP11-166B2.8   | --     |
| ENSG00000263432 | 0.035895 | -1.82353 | 1 | 1 RN7SL689P      | --     |
| ENSG00000263463 | 0.035895 | -1.82353 | 1 | 1 MIR378I        | --     |
| ENSG00000263612 | 0.035895 | -1.82353 | 1 | 1 AF186192.6     | --     |
| ENSG00000264177 | 0.035895 | -1.82353 | 1 | 1 RP1-37N7.1     | --     |
| ENSG00000264187 | 0.035895 | -1.82353 | 1 | 1 RP11-45M22.4   | K09594 |
| ENSG00000264635 | 0.035895 | -1.82353 | 1 | 1 RP11-769O8.3   | --     |
| ENSG00000264668 | 0.035895 | -1.82353 | 1 | 1 ZFP41          | K09228 |
| ENSG00000264952 | 0.035895 | -1.82353 | 1 | 1 AC004000.1     | --     |
| ENSG00000265106 | 0.035895 | -1.82353 | 1 | 1 Z93241.1       | --     |
| ENSG00000265293 | 0.035895 | -1.82353 | 1 | 1 ARGFXP2        | --     |
| ENSG00000265490 | 0.035895 | -1.82353 | 1 | 1 RP11-806L2.6   | --     |
| ENSG00000266124 | 0.035895 | -1.82353 | 1 | 1 MIR5587        | --     |
| ENSG00000266127 | 0.035895 | -1.82353 | 1 | 1 RP11-474N24.2  | K09228 |
| ENSG00000266601 | 0.035895 | -1.82353 | 1 | 1 RP11-6N17.3    | --     |
| ENSG00000266905 | 0.035895 | -1.82353 | 1 | 1 RP11-1058N17.1 | --     |
| ENSG00000267018 | 0.035895 | -1.82353 | 1 | 1 AC010525.7     | --     |
| ENSG00000267200 | 0.035895 | -1.82353 | 1 | 1 MIR132         | --     |
| ENSG00000267312 | 0.035895 | -1.82353 | 1 | 1 RP11-1094M14.7 | K01939 |
| ENSG00000267454 | 0.035895 | -1.82353 | 1 | 1 ZNF582-AS1     | --     |
| ENSG00000267757 | 0.035895 | -1.82353 | 1 | 1 C19orf83       | K18595 |
| ENSG00000267905 | 0.035895 | -1.82353 | 1 | 1 CTD-2616J11.16 | --     |
| ENSG00000268564 | 0.035895 | -1.82353 | 1 | 1 AC003956.1     | --     |
| ENSG00000268756 | 0.035895 | -1.82353 | 1 | 1 AC104534.2     | --     |
| ENSG00000269482 | 0.035895 | -1.82353 | 1 | 1 Z69720.2       | --     |
| ENSG00000269720 | 0.035895 | -1.82353 | 1 | 1 CTD-2521M24.5  | --     |
| ENSG00000269794 | 0.035895 | -1.82353 | 1 | 1 AC010642.2     | K09228 |
| ENSG00000270061 | 0.035895 | -1.82353 | 1 | 1 RP11-214K3.19  | --     |
| ENSG00000270097 | 0.035895 | -1.82353 | 1 | 1 LA16c-380H5.3  | --     |
| ENSG00000270264 | 0.035895 | -1.82353 | 1 | 1 NDUFB8P2       | K03964 |
| ENSG00000270760 | 0.035895 | -1.82353 | 1 | 1 AD001527.7     | --     |
| ENSG00000271009 | 0.035895 | -1.82353 | 1 | 1 RP11-346C20.3  | --     |
| ENSG00000271259 | 0.035895 | -1.82353 | 1 | 1 RP11-1109F11.5 | --     |
| ENSG00000271308 | 0.035895 | -1.82353 | 1 | 1 AP003900.6     | --     |
| ENSG00000271590 | 0.035895 | -1.82353 | 1 | 1 RP11-181E10.3  | --     |
| ENSG00000271963 | 0.035895 | -1.82353 | 1 | 1 CTD-2140B24.6  | --     |
| ENSG00000272043 | 0.035895 | -1.82353 | 1 | 1 RP11-44N11.3   | --     |
| ENSG00000272182 | 0.035895 | -1.82353 | 1 | 1 RP11-802O23.3  | --     |
| ENSG00000272426 | 0.035895 | -1.82353 | 1 | 1 RP11-108M9.6   | --     |
| ENSG00000272442 | 0.035895 | -1.82353 | 1 | 1 RP11-444E17.6  | K01872 |
| ENSG00000272444 | 0.035895 | -1.82353 | 1 | 1 RP11-1017G21.6 | --     |
| ENSG00000272459 | 0.035895 | -1.82353 | 1 | 1 RP11-1277A3.3  | --     |
| ENSG00000272465 | 0.035895 | -1.82353 | 1 | 1 RP1-136B1.1    | --     |
| ENSG00000272588 | 0.035895 | -1.82353 | 1 | 1 RP11-440L14.4  | --     |
| ENSG00000272695 | 0.035895 | -1.82353 | 1 | 1 GAS6-AS2       | --     |
| ENSG00000272862 | 0.035895 | -1.82353 | 1 | 1 RP11-814H16.2  | --     |
| ENSG00000272914 | 0.035895 | -1.82353 | 1 | 1 RP11-330O11.3  | --     |
| ENSG00000272916 | 0.035895 | -1.82353 | 1 | 1 RP11-574K11.31 | K02577 |
| ENSG00000273006 | 0.035895 | -1.82353 | 1 | 1 RP11-314C9.2   | --     |

|                 |           |          |   |                  |        |
|-----------------|-----------|----------|---|------------------|--------|
| ENSG00000273032 | 0.035895  | -1.82353 | 1 | 1 DGCR9          | -      |
| ENSG00000273056 | 0.035895  | -1.82353 | 1 | 1 RP11-77E14.2   | -      |
| ENSG00000273176 | 0.035895  | -1.82353 | 1 | 1 RP3-510H16.3   | -      |
| ENSG00000273403 | 0.035895  | -1.82353 | 1 | 1 RP11-329B9.3   | -      |
| ENSG00000273416 | 0.035895  | -1.82353 | 1 | 1 RP4-597N16.4   | -      |
| ENSG00000273424 | 0.035895  | -1.82353 | 1 | 1 CTA-223H9.9    | -      |
| ENSG00000273442 | 0.035895  | -1.82353 | 1 | 1 AC006946.17    | -      |
| ENSG00000213443 | -0.035054 | 2.295208 | 1 | 1 RP11-75L1.2    | K11276 |
| ENSG00000138696 | -0.034319 | 2.621676 | 1 | 1 BMPR1B         | K13578 |
| ENSG00000214222 | -0.033209 | 2.330449 | 1 | 1 TUBBP2         | K07375 |
| ENSG00000260261 | -0.031432 | 1.965101 | 1 | 1 RP11-480A16.1  | -      |
| ENSG00000227403 | -0.03139  | 1.410107 | 1 | 1 AC009299.3     | -      |
| ENSG00000184163 | -0.031264 | 0.495923 | 1 | 1 FAM132A        | -      |
| ENSG00000230373 | -0.031264 | 0.495923 | 1 | 1 GOLGA6L5P      | K10595 |
| ENSG00000246203 | -0.031264 | 0.495923 | 1 | 1 RP11-29H23.5   | -      |
| ENSG00000250934 | -0.031264 | 0.495923 | 1 | 1 RP11-71E19.1   | -      |
| ENSG00000172687 | -0.028827 | 2.731249 | 1 | 1 ZNF738         | K09228 |
| ENSG00000161048 | -0.027581 | 2.757392 | 1 | 1 NAPEPLD        | K13985 |
| ENSG00000247092 | 0.027432  | 2.972415 | 1 | 1 SNHG10         | -      |
| ENSG00000113763 | -0.027182 | 3.02319  | 1 | 1 UNC5A          | K07521 |
| ENSG00000162419 | -0.025227 | 3.065667 | 1 | 1 GMEB1          | -      |
| ENSG00000139192 | -0.025165 | 1.536137 | 1 | 1 TAPBPL         | K08510 |
| ENSG00000187800 | -0.025165 | 1.536137 | 1 | 1 PEAR1          | -      |
| ENSG00000226539 | -0.025165 | 1.536137 | 1 | 1 AC012512.1     | K09113 |
| ENSG00000070731 | -0.025073 | 0.614885 | 1 | 1 ST6GALNAC2     | K06616 |
| ENSG00000136859 | -0.025073 | 0.614885 | 1 | 1 ANGPTL2        | -      |
| ENSG00000171956 | -0.025073 | 0.614885 | 1 | 1 FOXB1          | K09395 |
| ENSG00000249492 | -0.025073 | 0.614885 | 1 | 1 RP11-159F24.3  | -      |
| ENSG00000257511 | -0.025073 | 0.614885 | 1 | 1 RP11-278C7.1   | K11279 |
| ENSG00000258301 | -0.025073 | 0.614885 | 1 | 1 RP11-488C13.5  | -      |
| ENSG00000267698 | -0.025073 | 0.614885 | 1 | 1 AC002116.7     | -      |
| ENSG00000273281 | -0.025073 | 0.614885 | 1 | 1 RP11-339B21.14 | -      |
| ENSG00000105088 | 0.023564  | 2.561584 | 1 | 1 OLFM2          | -      |
| ENSG00000158315 | 0.023564  | 2.561584 | 1 | 1 RHBDL2         | K02857 |
| ENSG00000137841 | -0.023023 | 2.857482 | 1 | 1 PLCB2          | K05858 |
| ENSG00000078114 | -0.022488 | 2.555675 | 1 | 1 NEBL           | -      |
| ENSG00000137070 | -0.022449 | 1.595261 | 1 | 1 IL11RA         | K05056 |
| ENSG00000172986 | -0.022449 | 1.595261 | 1 | 1 GXYLT2         | K13676 |
| ENSG00000135540 | 0.021342  | 2.371375 | 1 | 1 NHSL1          | -      |
| ENSG00000149380 | -0.02097  | 2.905043 | 1 | 1 P4HA3          | K00472 |
| ENSG00000204959 | 0.01997   | 2.265969 | 1 | 1 ARHGGEF34P     | -      |
| ENSG00000121769 | -0.019887 | 0.724805 | 1 | 1 FABP3          | K08752 |
| ENSG00000130783 | -0.019887 | 0.724805 | 1 | 1 CCDC62         | -      |
| ENSG00000163295 | -0.019887 | 0.724805 | 1 | 1 ALPI           | K01077 |
| ENSG00000164406 | -0.019887 | 0.724805 | 1 | 1 LEAP2          | K04135 |
| ENSG00000197927 | -0.019887 | 0.724805 | 1 | 1 C2orf27A       | -      |
| ENSG00000203797 | -0.019887 | 0.724805 | 1 | 1 DDO            | K00272 |
| ENSG00000225422 | -0.019887 | 0.724805 | 1 | 1 RBMS1P1        | -      |
| ENSG00000258713 | -0.019887 | 0.724805 | 1 | 1 C20orf141      | -      |
| ENSG00000080823 | -0.018812 | 2.642408 | 1 | 1 MOK            | K08830 |
| ENSG00000151917 | -0.018812 | 2.642408 | 1 | 1 BEND6          | -      |
| ENSG00000261652 | 0.018387  | 3.126198 | 1 | 1 C15orf65       | -      |
| ENSG00000144445 | -0.018013 | 3.453568 | 1 | 1 KANSL1L        | -      |
| ENSG00000169750 | -0.018013 | 3.453568 | 1 | 1 RAC3           | K07861 |
| ENSG00000105649 | -0.017654 | 1.706721 | 1 | 1 RAB3A          | K07882 |
| ENSG00000145687 | -0.017654 | 1.706721 | 1 | 1 SSBP2          | -      |
| ENSG00000136895 | 0.017135  | 2.071157 | 1 | 1 GARNL3         | -      |
| ENSG00000149489 | 0.017135  | 2.071157 | 1 | 1 ROM1           | K17344 |

|                 |           |          |   |                    |        |
|-----------------|-----------|----------|---|--------------------|--------|
| ENSG00000187240 | -0.016945 | 2.285535 | 1 | 1 DYNC2H1          | K10414 |
| ENSG00000157445 | 0.015775  | 3.530923 | 1 | 1 CACNA2D3         | K04860 |
| ENSG00000089356 | 0.015747  | 1.985229 | 1 | 1 FXYD3            | K13361 |
| ENSG00000183621 | -0.015551 | 2.72423  | 1 | 1 ZNF438           | -      |
| ENSG00000110876 | -0.015527 | 1.759388 | 1 | 1 SELPLG           | K06544 |
| ENSG00000163633 | -0.015527 | 1.759388 | 1 | 1 C4orf36          | K00543 |
| ENSG00000240498 | -0.015527 | 1.759388 | 1 | 1 CDKN2B-AS1       | -      |
| ENSG00000249740 | -0.015527 | 1.759388 | 1 | 1 CTD-2127H9.1     | -      |
| ENSG00000226210 | -0.015478 | 0.826961 | 1 | 1 ABC7-42389800N19 | K18461 |
| ENSG00000197763 | 0.014604  | 2.886411 | 1 | 1 TXNRD3           | K00384 |
| ENSG00000166263 | -0.014545 | 2.750507 | 1 | 1 STXBP4           | K15302 |
| ENSG00000163788 | 0.0142    | 3.846617 | 1 | 1 SNRK             | K08802 |
| ENSG00000215908 | 0.013019  | 3.370613 | 1 | 1 CROCCP2          | -      |
| ENSG00000005189 | -0.012639 | 2.801669 | 1 | 1 AC004381.6       | K14570 |
| ENSG00000007944 | 0.012381  | 2.762694 | 1 | 1 MYLIP            | K10637 |
| ENSG00000162927 | 0.012381  | 2.762694 | 1 | 1 PUS10            | K07583 |
| ENSG00000197580 | 0.012363  | 1.796332 | 1 | 1 BCO2             | K10252 |
| ENSG00000229358 | 0.012363  | 1.796332 | 1 | 1 DPY19L1P1        | K09654 |
| ENSG00000154319 | 0.011887  | 2.736626 | 1 | 1 FAM167A          | -      |
| ENSG00000181404 | -0.01172  | 1.859296 | 1 | 1 XXyac-YRM2039.2  | K18461 |
| ENSG00000168427 | -0.011686 | 0.922376 | 1 | 1 KLHL30           | K10466 |
| ENSG00000196605 | -0.011686 | 0.922376 | 1 | 1 ZNF846           | K09228 |
| ENSG00000235423 | -0.011686 | 0.922376 | 1 | 1 RP11-282O18.3    | -      |
| ENSG00000240376 | -0.011686 | 0.922376 | 1 | 1 RP11-36C20.1     | K02995 |
| ENSG00000260552 | 0.011356  | 1.74498  | 1 | 1 RP11-49I11.1     | -      |
| ENSG00000270346 | 0.011356  | 1.74498  | 1 | 1 RP1-90J20.12     | -      |
| ENSG00000198205 | 0.010664  | 3.246766 | 1 | 1 ZXDA             | -      |
| ENSG00000050344 | -0.010359 | 3.181049 | 1 | 1 NFE2L3           | K09040 |
| ENSG00000153933 | -0.01003  | 3.859062 | 1 | 1 DGKE             | K00901 |
| ENSG00000166321 | -0.010009 | 1.906775 | 1 | 1 NUDT13           | K03426 |
| ENSG00000216866 | -0.010009 | 1.906775 | 1 | 1 RPS2P55          | K02981 |
| ENSG00000126091 | -0.009697 | 3.200248 | 1 | 1 ST3GAL3          | K00781 |
| ENSG00000175898 | -0.009473 | 2.486472 | 1 | 1 CTD-2369P2.2     | -      |
| ENSG00000179859 | -0.009473 | 2.486472 | 1 | 1 AC025335.1       | -      |
| ENSG00000242498 | 0.009117  | 3.579531 | 1 | 1 C15orf38         | K09537 |
| ENSG00000142082 | 0.008914  | 4.14819  | 1 | 1 SIRT3            | K11413 |
| ENSG00000029639 | -0.008775 | 4.064345 | 1 | 1 TFB1M            | K15266 |
| ENSG00000266469 | -0.008428 | 4.074789 | 1 | 1 CTB-131K11.1     | -      |
| ENSG00000198795 | -0.008424 | 3.237897 | 1 | 1 ZNF521           | -      |
| ENSG00000170899 | -0.008388 | 1.011885 | 1 | 1 GSTA4            | K00799 |
| ENSG00000203279 | -0.008388 | 1.011885 | 1 | 1 RP11-498P14.5    | -      |
| ENSG00000204362 | -0.008388 | 1.011885 | 1 | 1 RP11-380J14.1    | -      |
| ENSG00000272365 | -0.008388 | 1.011885 | 1 | 1 RP11-389C8.3     | -      |
| ENSG00000237550 | 0.008062  | 4.108069 | 1 | 1 UBE2Q2P6         | K02940 |
| ENSG00000139567 | 0.007818  | 1.578978 | 1 | 1 ACVRL1           | K13594 |
| ENSG00000272779 | 0.007818  | 1.578978 | 1 | 1 LL22NC03-80A10.6 | K14569 |
| ENSG00000169031 | -0.007812 | 3.25636  | 1 | 1 COL4A3           | K06237 |
| ENSG00000238105 | 0.00739   | 4.07723  | 1 | 1 GOLGA2P5         | -      |
| ENSG00000132950 | -0.007216 | 3.27459  | 1 | 1 ZMYM5            | -      |
| ENSG00000163472 | 0.006921  | 3.070133 | 1 | 1 TMEM79           | K11125 |
| ENSG00000121481 | -0.006517 | 4.766426 | 1 | 1 RNF2             | K10695 |
| ENSG00000160961 | 0.006427  | 1.519118 | 1 | 1 ZNF333           | K09228 |
| ENSG00000184227 | 0.006427  | 1.519118 | 1 | 1 ACOT1            | K01068 |
| ENSG00000185522 | 0.006427  | 1.519118 | 1 | 1 C11orf35         | -      |
| ENSG00000196912 | 0.006427  | 1.519118 | 1 | 1 ANKRD36B         | K17299 |
| ENSG00000136169 | -0.006069 | 3.310374 | 1 | 1 SETDB2           | K18494 |
| ENSG00000087258 | 0.005702  | 4.0026   | 1 | 1 GNAO1            | K04534 |
| ENSG00000175691 | 0.0057    | 3.424841 | 1 | 1 ZNF77            | K09228 |

|                 |           |          |   |                 |        |
|-----------------|-----------|----------|---|-----------------|--------|
| ENSG00000153233 | -0.005494 | 1.096176 | 1 | 1 PTPRR         | K04458 |
| ENSG00000169122 | -0.005494 | 1.096176 | 1 | 1 FAM110B       | -      |
| ENSG00000172943 | -0.005494 | 1.096176 | 1 | 1 PHF8          | K19415 |
| ENSG00000220201 | -0.005494 | 1.096176 | 1 | 1 ZGLP1         | -      |
| ENSG00000261167 | -0.005494 | 1.096176 | 1 | 1 RP11-517B11.7 | -      |
| ENSG00000187257 | -0.005133 | 4.810846 | 1 | 1 RSBN1L        | -      |
| ENSG00000131374 | -0.005067 | 3.601599 | 1 | 1 TBC1D5        | -      |
| ENSG00000176182 | -0.004977 | 3.345293 | 1 | 1 MYPOP         | -      |
| ENSG00000187860 | 0.004915  | 2.413737 | 1 | 1 CCDC157       | -      |
| ENSG00000152284 | 0.004906  | 1.456672 | 1 | 1 TCF7L1        | K04490 |
| ENSG00000184209 | -0.004787 | 4.476496 | 1 | 1 SNRNP35       | K13155 |
| ENSG00000101363 | -0.004668 | 5.475176 | 1 | 1 MANBAL        | -      |
| ENSG00000068885 | 0.004654  | 3.958156 | 1 | 1 IFT80         | K19678 |
| ENSG00000076555 | -0.004622 | 2.634915 | 1 | 1 ACACB         | K01946 |
| ENSG00000136925 | 0.004516  | 3.375007 | 1 | 1 TSTD2         | -      |
| ENSG00000102977 | -0.004423 | 5.112842 | 1 | 1 ACD           | K11114 |
| ENSG00000139354 | 0.004332  | 4.812372 | 1 | 1 GAS2L3        | K14404 |
| ENSG00000123095 | -0.004193 | 3.630202 | 1 | 1 BHLHE41       | K03730 |
| ENSG00000231259 | -0.004191 | 3.054648 | 1 | 1 AC125232.1    | K03348 |
| ENSG00000163888 | 0.003935  | 3.668524 | 1 | 1 CAMK2N2       | K01415 |
| ENSG00000101452 | 0.003894  | 4.338008 | 1 | 1 DHX35         | K13117 |
| ENSG00000119650 | 0.003742  | 4.140799 | 1 | 1 IFT43         | K19675 |
| ENSG00000254470 | 0.003422  | 4.638403 | 1 | 1 AP5B1         | K19022 |
| ENSG00000177728 | 0.003248  | 5.305901 | 1 | 1 KIAA0195      | -      |
| ENSG00000049192 | 0.003242  | 2.346409 | 1 | 1 ADAMTS6       | K08621 |
| ENSG00000116668 | 0.003242  | 2.346409 | 1 | 1 SWT1          | -      |
| ENSG00000259838 | 0.003235  | 1.391407 | 1 | 1 TCEB1P2       | K03872 |
| ENSG00000165660 | -0.003218 | 5.235481 | 1 | 1 FAM175B       | -      |
| ENSG00000083544 | -0.003134 | 4.771238 | 1 | 1 TDRD3         | K18404 |
| ENSG00000127220 | 0.002975  | 4.996747 | 1 | 1 ABHD8         | K13701 |
| ENSG00000115661 | 0.002852  | 4.464578 | 1 | 1 STK16         | K08856 |
| ENSG00000204174 | 0.002649  | 2.892651 | 1 | 1 NPY4R         | K04206 |
| ENSG00000103064 | -0.002626 | 4.994012 | 1 | 1 SLC7A6        | K13872 |
| ENSG00000106588 | -0.002587 | 5.408593 | 1 | 1 PSMA2         | K13137 |
| ENSG00000109016 | -0.002497 | 5.09113  | 1 | 1 DHRS7B        | K11166 |
| ENSG00000106268 | 0.002477  | 5.083379 | 1 | 1 NUDT1         | K17816 |
| ENSG00000174276 | 0.002477  | 4.090211 | 1 | 1 ZNHIT2        | -      |
| ENSG00000161692 | -0.002468 | 4.999506 | 1 | 1 DBF4B         | -      |
| ENSG00000108039 | -0.002427 | 5.615068 | 1 | 1 XPNPEP1       | K01262 |
| ENSG00000162650 | 0.002344  | 3.287928 | 1 | 1 ATXN7L2       | K11318 |
| ENSG00000164088 | 0.002344  | 3.287928 | 1 | 1 PPM1M         | K17507 |
| ENSG00000165630 | 0.002344  | 3.287928 | 1 | 1 PRPF18        | K12817 |
| ENSG00000072958 | -0.002324 | 5.618642 | 1 | 1 AP1M1         | K12393 |
| ENSG00000165410 | 0.002288  | 6.26469  | 1 | 1 CFL2          | K05765 |
| ENSG00000156735 | 0.002035  | 4.432446 | 1 | 1 BAG4          | K09558 |
| ENSG00000104973 | 0.001981  | 5.777389 | 1 | 1 MED25         | K15168 |
| ENSG00000197172 | -0.001972 | 5.196543 | 1 | 1 MAGEA6        | -      |
| ENSG00000166900 | -0.001913 | 5.111569 | 1 | 1 STX3          | K08486 |
| ENSG00000103051 | -0.001897 | 5.864268 | 1 | 1 COG4          | -      |
| ENSG00000080802 | -0.001769 | 4.442591 | 1 | 1 CNOT4         | K10643 |
| ENSG00000115568 | 0.001718  | 3.840665 | 1 | 1 ZNF142        | -      |
| ENSG00000112237 | 0.001598  | 6.096067 | 1 | 1 CCNC          | K15161 |
| ENSG00000188522 | 0.001505  | 5.406525 | 1 | 1 FAM83G        | K14390 |
| ENSG00000161395 | 0.001395  | 2.275789 | 1 | 1 PGAP3         | -      |
| ENSG00000215386 | 0.001392  | 1.323056 | 1 | 1 LINC00478     | -      |
| ENSG00000119446 | -0.001125 | 4.947863 | 1 | 1 RBM18         | K02838 |
| ENSG00000186222 | 0.001117  | 4.037786 | 1 | 1 BLOC1S4       | K08366 |
| ENSG00000086102 | 0.001096  | 6.503341 | 1 | 1 NFX1          | K12236 |

|                 |           |          |   |                   |        |
|-----------------|-----------|----------|---|-------------------|--------|
| ENSG00000134697 | -0.001013 | 6.753881 | 1 | 1 GNL2            | K14537 |
| ENSG00000186566 | -0.000928 | 5.729422 | 1 | 1 GPATCH8         | -      |
| ENSG00000267321 | -0.000898 | 4.322785 | 1 | 1 RP11-1094M14.11 | -      |
| ENSG00000187951 | 0.000833  | 4.027069 | 1 | 1 ARHGAP11B       | K17545 |
| ENSG00000108774 | -0.000817 | 5.902896 | 1 | 1 RAB5C           | K07889 |
| ENSG00000188647 | 0.000795  | 5.731902 | 1 | 1 PTAR1           | K14137 |
| ENSG00000155975 | -0.000792 | 5.151598 | 1 | 1 VPS37A          | K12185 |
| ENSG00000176018 | 0.000779  | 5.209635 | 1 | 1 LYSMD3          | -      |
| ENSG00000103356 | 0.000737  | 4.382866 | 1 | 1 EARS2           | K01885 |
| ENSG00000205138 | -0.000656 | 4.331523 | 1 | 1 SDHAF1          | K18167 |
| ENSG00000168781 | -0.000656 | 3.972256 | 1 | 1 PPIP5K1         | K13024 |
| ENSG00000228175 | -0.000654 | 2.201541 | 1 | 1 GEMIN8P4        | K13136 |
| ENSG00000170961 | -0.000653 | 1.251313 | 1 | 1 HAS2            | K00752 |
| ENSG00000233527 | -0.000653 | 1.251313 | 1 | 1 AC092295.7      | -      |
| ENSG00000256940 | -0.000653 | 1.251313 | 1 | 1 RP11-783K16.5   | -      |
| ENSG00000126432 | -0.000536 | 7.910218 | 1 | 1 PRDX5           | K11187 |
| ENSG00000105518 | -0.000468 | 5.684933 | 1 | 1 TMEM205         | K07884 |
| ENSG00000203668 | 0.000452  | 7.025678 | 1 | 1 CHML            | K11667 |
| ENSG00000085433 | 0.000398  | 4.782422 | 1 | 1 WDR47           | -      |
| ENSG00000156650 | 0.000398  | 3.790854 | 1 | 1 KAT6B           | K11306 |
| ENSG00000250132 | 0.000397  | 2.239142 | 1 | 1 RP11-359B12.2   | -      |
| ENSG00000141456 | -0.000314 | 7.272558 | 1 | 1 PELP1           | K16913 |
| ENSG00000123179 | 0.000251  | 6.315678 | 1 | 1 EBPL            | -      |
| ENSG00000174989 | 0.000251  | 4.005393 | 1 | 1 FBXW8           | K10264 |
| ENSG00000205246 | 0.00015   | 6.825623 | 1 | 1 RPSAP58         | K02998 |
| ENSG00000144535 | 0.00014   | 4.192119 | 1 | 1 DIS3L2          | K18758 |
| ENSG00000101413 | -0.000122 | 5.176065 | 1 | 1 RPRD1B          | K15559 |
| ENSG00000235823 | 5.31E-05  | 3.778129 | 1 | 1 LINC00263       | -      |
| ENSG00000000005 | 5.13E-15  | -2.63127 | 1 | 1 TNMD            | -      |
| ENSG00000001561 | 5.13E-15  | -2.63127 | 1 | 1 ENPP4           | K18424 |
| ENSG00000002587 | 5.13E-15  | -2.63127 | 1 | 1 HS3ST1          | K01024 |
| ENSG00000002726 | 5.13E-15  | -2.63127 | 1 | 1 AOC1            | K11182 |
| ENSG00000002933 | 5.13E-15  | -2.63127 | 1 | 1 TMEM176A        | -      |
| ENSG00000004142 | 5.13E-15  | -2.63127 | 1 | 1 POLDIP2         | K17809 |
| ENSG00000004468 | 5.13E-15  | -2.63127 | 1 | 1 CD38            | K01242 |
| ENSG00000004848 | 5.13E-15  | -2.63127 | 1 | 1 ARX             | K09452 |
| ENSG00000004948 | 5.13E-15  | -2.63127 | 1 | 1 CALCR           | K04576 |
| ENSG00000005108 | 5.13E-15  | -2.63127 | 1 | 1 THSD7A          | -      |
| ENSG00000005249 | 5.13E-15  | -2.63127 | 1 | 1 PRKAR2B         | K04739 |
| ENSG00000005379 | 5.13E-15  | -2.63127 | 1 | 1 BZRAP1          | -      |
| ENSG00000005381 | 5.13E-15  | -2.63127 | 1 | 1 MPO             | K10789 |
| ENSG00000005471 | 5.13E-15  | -2.63127 | 1 | 1 ABCB4           | K05659 |
| ENSG00000005513 | 5.13E-15  | -2.63127 | 1 | 1 SOX8            | K09270 |
| ENSG00000005981 | 5.13E-15  | -2.63127 | 1 | 1 ASB4            | K10326 |
| ENSG00000006042 | 5.13E-15  | -2.63127 | 1 | 1 TMEM98          | -      |
| ENSG00000006059 | 5.13E-15  | -2.63127 | 1 | 1 KRT33A          | K07604 |
| ENSG00000006071 | 5.13E-15  | -2.63127 | 1 | 1 ABCC8           | K05032 |
| ENSG00000006074 | 5.13E-15  | -2.63127 | 1 | 1 CCL18           | K05514 |
| ENSG00000006128 | 5.13E-15  | -2.63127 | 1 | 1 TAC1            | K05239 |
| ENSG00000006377 | 5.13E-15  | -2.63127 | 1 | 1 DLX6            | K09314 |
| ENSG00000006468 | 5.13E-15  | -2.63127 | 1 | 1 ETV1            | K09431 |
| ENSG00000006606 | 5.13E-15  | -2.63127 | 1 | 1 CCL26           | K05514 |
| ENSG00000006659 | 5.13E-15  | -2.63127 | 1 | 1 LGALS14         | K10097 |
| ENSG00000006747 | 5.13E-15  | -2.63127 | 1 | 1 SCIN            | K05768 |
| ENSG00000006756 | 5.13E-15  | -2.63127 | 1 | 1 ARSD            | K12374 |
| ENSG00000006788 | 5.13E-15  | -2.63127 | 1 | 1 MYH13           | K10352 |
| ENSG00000007001 | 5.13E-15  | -2.63127 | 1 | 1 UPP2            | K00757 |
| ENSG00000007062 | 5.13E-15  | -2.63127 | 1 | 1 PROM1           | K06532 |

|                 |          |          |   |            |        |
|-----------------|----------|----------|---|------------|--------|
| ENSG00000007129 | 5.13E-15 | -2.63127 | 1 | 1 CEACAM21 | -      |
| ENSG00000007171 | 5.13E-15 | -2.63127 | 1 | 1 NOS2     | K13241 |
| ENSG00000007174 | 5.13E-15 | -2.63127 | 1 | 1 DNAH9    | K10408 |
| ENSG00000007216 | 5.13E-15 | -2.63127 | 1 | 1 SLC13A2  | K14445 |
| ENSG00000007306 | 5.13E-15 | -2.63127 | 1 | 1 CEACAM7  | K06499 |
| ENSG00000007350 | 5.13E-15 | -2.63127 | 1 | 1 TKTL1    | K00615 |
| ENSG00000007908 | 5.13E-15 | -2.63127 | 1 | 1 SELE     | K06494 |
| ENSG00000007933 | 5.13E-15 | -2.63127 | 1 | 1 FMO3     | K00485 |
| ENSG00000008118 | 5.13E-15 | -2.63127 | 1 | 1 CAMK1G   | K08794 |
| ENSG00000008196 | 5.13E-15 | -2.63127 | 1 | 1 TFAP2B   | K09176 |
| ENSG00000008197 | 5.13E-15 | -2.63127 | 1 | 1 TFAP2D   | K09178 |
| ENSG00000008311 | 5.13E-15 | -2.63127 | 1 | 1 AASS     | K14157 |
| ENSG00000010030 | 5.13E-15 | -2.63127 | 1 | 1 ETV7     | K03211 |
| ENSG00000010282 | 5.13E-15 | -2.63127 | 1 | 1 HHATL    | -      |
| ENSG00000010438 | 5.13E-15 | -2.63127 | 1 | 1 PRSS3    | K01312 |
| ENSG00000010610 | 5.13E-15 | -2.63127 | 1 | 1 CD4      | K06454 |
| ENSG00000010671 | 5.13E-15 | -2.63127 | 1 | 1 BTK      | K07370 |
| ENSG00000011052 | 5.13E-15 | -2.63127 | 1 | 1 NME2     | K00940 |
| ENSG00000011083 | 5.13E-15 | -2.63127 | 1 | 1 SLC6A7   | K05038 |
| ENSG00000011201 | 5.13E-15 | -2.63127 | 1 | 1 KAL1     | -      |
| ENSG00000011600 | 5.13E-15 | -2.63127 | 1 | 1 TYROBP   | K07992 |
| ENSG00000012504 | 5.13E-15 | -2.63127 | 1 | 1 NR1H4    | K08537 |
| ENSG00000012779 | 5.13E-15 | -2.63127 | 1 | 1 ALOX5    | K00461 |
| ENSG00000012817 | 5.13E-15 | -2.63127 | 1 | 1 KDM5D    | K11446 |
| ENSG00000013016 | 5.13E-15 | -2.63127 | 1 | 1 EHD3     | K12476 |
| ENSG00000013293 | 5.13E-15 | -2.63127 | 1 | 1 SLC7A14  | -      |
| ENSG00000013725 | 5.13E-15 | -2.63127 | 1 | 1 CD6      | K06456 |
| ENSG00000014257 | 5.13E-15 | -2.63127 | 1 | 1 ACPP     | K19283 |
| ENSG00000015285 | 5.13E-15 | -2.63127 | 1 | 1 WAS      | K05747 |
| ENSG00000015592 | 5.13E-15 | -2.63127 | 1 | 1 STMN4    | -      |
| ENSG00000016082 | 5.13E-15 | -2.63127 | 1 | 1 ISL1     | K09370 |
| ENSG00000016402 | 5.13E-15 | -2.63127 | 1 | 1 IL20RA   | K05136 |
| ENSG00000016490 | 5.13E-15 | -2.63127 | 1 | 1 CLCA1    | K05027 |
| ENSG00000016602 | 5.13E-15 | -2.63127 | 1 | 1 CLCA4    | K05030 |
| ENSG00000017427 | 5.13E-15 | -2.63127 | 1 | 1 IGF1     | K05459 |
| ENSG00000018236 | 5.13E-15 | -2.63127 | 1 | 1 CNTN1    | K06759 |
| ENSG00000018607 | 5.13E-15 | -2.63127 | 1 | 1 ZNF806   | K09228 |
| ENSG00000020219 | 5.13E-15 | -2.63127 | 1 | 1 CCT8L1P  | K09500 |
| ENSG00000021461 | 5.13E-15 | -2.63127 | 1 | 1 CYP3A43  | K17692 |
| ENSG00000021488 | 5.13E-15 | -2.63127 | 1 | 1 SLC7A9   | K13868 |
| ENSG00000021852 | 5.13E-15 | -2.63127 | 1 | 1 C8B      | K03998 |
| ENSG00000022355 | 5.13E-15 | -2.63127 | 1 | 1 GABRA1   | K05175 |
| ENSG00000022556 | 5.13E-15 | -2.63127 | 1 | 1 NLRP2    | K19409 |
| ENSG00000025039 | 5.13E-15 | -2.63127 | 1 | 1 RRAGD    | K16186 |
| ENSG00000026751 | 5.13E-15 | -2.63127 | 1 | 1 SLAMF7   | K06733 |
| ENSG00000027644 | 5.13E-15 | -2.63127 | 1 | 1 INSR     | K05086 |
| ENSG00000029559 | 5.13E-15 | -2.63127 | 1 | 1 IBSP     | K06253 |
| ENSG00000030304 | 5.13E-15 | -2.63127 | 1 | 1 MUSK     | K05129 |
| ENSG00000030419 | 5.13E-15 | -2.63127 | 1 | 1 IKZF2    | K09220 |
| ENSG00000034053 | 5.13E-15 | -2.63127 | 1 | 1 APBA2    | -      |
| ENSG00000034239 | 5.13E-15 | -2.63127 | 1 | 1 EFCAB1   | -      |
| ENSG00000034971 | 5.13E-15 | -2.63127 | 1 | 1 MYOC     | -      |
| ENSG00000035720 | 5.13E-15 | -2.63127 | 1 | 1 STAP1    | -      |
| ENSG00000036448 | 5.13E-15 | -2.63127 | 1 | 1 MYOM2    | -      |
| ENSG00000036473 | 5.13E-15 | -2.63127 | 1 | 1 OTC      | K00611 |
| ENSG00000036565 | 5.13E-15 | -2.63127 | 1 | 1 SLC18A1  | K08155 |
| ENSG00000036828 | 5.13E-15 | -2.63127 | 1 | 1 CASR     | K04612 |
| ENSG00000038427 | 5.13E-15 | -2.63127 | 1 | 1 VCAN     | K06793 |

|                 |          |          |   |            |        |
|-----------------|----------|----------|---|------------|--------|
| ENSG00000038945 | 5.13E-15 | -2.63127 | 1 | 1 MSR1     | K06558 |
| ENSG00000039537 | 5.13E-15 | -2.63127 | 1 | 1 C6       | K03995 |
| ENSG00000039600 | 5.13E-15 | -2.63127 | 1 | 1 SOX30    | K09271 |
| ENSG00000042304 | 5.13E-15 | -2.63127 | 1 | 1 C2orf83  | K11447 |
| ENSG00000042813 | 5.13E-15 | -2.63127 | 1 | 1 ZPBP     | -      |
| ENSG00000043039 | 5.13E-15 | -2.63127 | 1 | 1 BARX2    | K09361 |
| ENSG00000043462 | 5.13E-15 | -2.63127 | 1 | 1 LCP2     | K07361 |
| ENSG00000044012 | 5.13E-15 | -2.63127 | 1 | 1 GUCA2B   | -      |
| ENSG00000046774 | 5.13E-15 | -2.63127 | 1 | 1 MAGEC2   | -      |
| ENSG00000046889 | 5.13E-15 | -2.63127 | 1 | 1 PREX2    | K17588 |
| ENSG00000048462 | 5.13E-15 | -2.63127 | 1 | 1 TNFRSF17 | K05153 |
| ENSG00000048740 | 5.13E-15 | -2.63127 | 1 | 1 CELF2    | K13207 |
| ENSG00000049247 | 5.13E-15 | -2.63127 | 1 | 1 UTS2     | K05248 |
| ENSG00000049319 | 5.13E-15 | -2.63127 | 1 | 1 SRD5A2   | -      |
| ENSG00000049540 | 5.13E-15 | -2.63127 | 1 | 1 ELN      | K14211 |
| ENSG00000049768 | 5.13E-15 | -2.63127 | 1 | 1 FOXP3    | K10163 |
| ENSG00000050030 | 5.13E-15 | -2.63127 | 1 | 1 KIAA2022 | -      |
| ENSG00000050730 | 5.13E-15 | -2.63127 | 1 | 1 TNIP3    | -      |
| ENSG00000050767 | 5.13E-15 | -2.63127 | 1 | 1 COL23A1  | -      |
| ENSG00000053108 | 5.13E-15 | -2.63127 | 1 | 1 FSTL4    | -      |
| ENSG00000053328 | 5.13E-15 | -2.63127 | 1 | 1 METTL24  | -      |
| ENSG00000054796 | 5.13E-15 | -2.63127 | 1 | 1 SPO11    | K10878 |
| ENSG00000054803 | 5.13E-15 | -2.63127 | 1 | 1 CBLN4    | -      |
| ENSG00000054983 | 5.13E-15 | -2.63127 | 1 | 1 GALC     | K01202 |
| ENSG00000055118 | 5.13E-15 | -2.63127 | 1 | 1 KCNH2    | K04905 |
| ENSG00000055163 | 5.13E-15 | -2.63127 | 1 | 1 CYFIP2   | K05749 |
| ENSG00000055813 | 5.13E-15 | -2.63127 | 1 | 1 CCDC85A  | -      |
| ENSG00000055957 | 5.13E-15 | -2.63127 | 1 | 1 ITIH1    | K19014 |
| ENSG00000056487 | 5.13E-15 | -2.63127 | 1 | 1 PHF21B   | -      |
| ENSG00000056998 | 5.13E-15 | -2.63127 | 1 | 1 GYG2     | K00750 |
| ENSG00000058866 | 5.13E-15 | -2.63127 | 1 | 1 DGKG     | K00901 |
| ENSG00000059377 | 5.13E-15 | -2.63127 | 1 | 1 TBXAS1   | K01832 |
| ENSG00000060303 | 5.13E-15 | -2.63127 | 1 | 1 RPS17P5  | K02962 |
| ENSG00000060718 | 5.13E-15 | -2.63127 | 1 | 1 COL11A1  | K19721 |
| ENSG00000060982 | 5.13E-15 | -2.63127 | 1 | 1 BCAT1    | K02927 |
| ENSG00000061337 | 5.13E-15 | -2.63127 | 1 | 1 LZTS1    | -      |
| ENSG00000061492 | 5.13E-15 | -2.63127 | 1 | 1 WNT8A    | K00714 |
| ENSG00000061918 | 5.13E-15 | -2.63127 | 1 | 1 GUCY1B3  | K12319 |
| ENSG00000062096 | 5.13E-15 | -2.63127 | 1 | 1 ARSF     | K12374 |
| ENSG00000063515 | 5.13E-15 | -2.63127 | 1 | 1 GSC2     | K09325 |
| ENSG00000063587 | 5.13E-15 | -2.63127 | 1 | 1 ZNF275   | -      |
| ENSG00000064218 | 5.13E-15 | -2.63127 | 1 | 1 DMRT3    | K19490 |
| ENSG00000064300 | 5.13E-15 | -2.63127 | 1 | 1 NGFR     | K02583 |
| ENSG00000064692 | 5.13E-15 | -2.63127 | 1 | 1 SNCAIP   | K04558 |
| ENSG00000064787 | 5.13E-15 | -2.63127 | 1 | 1 BCAS1    | -      |
| ENSG00000064835 | 5.13E-15 | -2.63127 | 1 | 1 POU1F1   | K09363 |
| ENSG00000065320 | 5.13E-15 | -2.63127 | 1 | 1 NTN1     | K06843 |
| ENSG00000065371 | 5.13E-15 | -2.63127 | 1 | 1 ROPN1    | -      |
| ENSG00000065609 | 5.13E-15 | -2.63127 | 1 | 1 SNAP91   | -      |
| ENSG00000065675 | 5.13E-15 | -2.63127 | 1 | 1 PRKCQ    | K18052 |
| ENSG00000066185 | 5.13E-15 | -2.63127 | 1 | 1 ZMYND12  | -      |
| ENSG00000066294 | 5.13E-15 | -2.63127 | 1 | 1 CD84     | K06511 |
| ENSG00000066336 | 5.13E-15 | -2.63127 | 1 | 1 SPI1     | K09438 |
| ENSG00000066379 | 5.13E-15 | -2.63127 | 1 | 1 ZNRD1    | K03000 |
| ENSG00000066382 | 5.13E-15 | -2.63127 | 1 | 1 MPPED2   | -      |
| ENSG00000066813 | 5.13E-15 | -2.63127 | 1 | 1 ACSM2B   | K01896 |
| ENSG00000067048 | 5.13E-15 | -2.63127 | 1 | 1 DDX3Y    | K17642 |
| ENSG00000067445 | 5.13E-15 | -2.63127 | 1 | 1 TRO      | -      |

|                 |          |          |   |            |        |
|-----------------|----------|----------|---|------------|--------|
| ENSG00000067646 | 5.13E-15 | -2.63127 | 1 | 1 ZFY      | -      |
| ENSG00000067840 | 5.13E-15 | -2.63127 | 1 | 1 PDZD4    | K15682 |
| ENSG00000067842 | 5.13E-15 | -2.63127 | 1 | 1 ATP2B3   | K05850 |
| ENSG00000069018 | 5.13E-15 | -2.63127 | 1 | 1 TRPC7    | K04970 |
| ENSG00000069122 | 5.13E-15 | -2.63127 | 1 | 1 GPR116   | K08458 |
| ENSG00000069431 | 5.13E-15 | -2.63127 | 1 | 1 ABCC9    | K05033 |
| ENSG00000069535 | 5.13E-15 | -2.63127 | 1 | 1 MAOB     | K00274 |
| ENSG00000069764 | 5.13E-15 | -2.63127 | 1 | 1 PLA2G10  | K01047 |
| ENSG00000070019 | 5.13E-15 | -2.63127 | 1 | 1 GUCY2C   | K12320 |
| ENSG00000070193 | 5.13E-15 | -2.63127 | 1 | 1 FGF10    | K04358 |
| ENSG00000070601 | 5.13E-15 | -2.63127 | 1 | 1 FRMPD1   | -      |
| ENSG00000070748 | 5.13E-15 | -2.63127 | 1 | 1 CHAT     | K00623 |
| ENSG00000070886 | 5.13E-15 | -2.63127 | 1 | 1 EPHA8    | K05109 |
| ENSG00000070985 | 5.13E-15 | -2.63127 | 1 | 1 TRPM5    | K04980 |
| ENSG00000071203 | 5.13E-15 | -2.63127 | 1 | 1 MS4A12   | -      |
| ENSG00000071575 | 5.13E-15 | -2.63127 | 1 | 1 TRIB2    | K08814 |
| ENSG00000071677 | 5.13E-15 | -2.63127 | 1 | 1 PRLH     | K05269 |
| ENSG00000071909 | 5.13E-15 | -2.63127 | 1 | 1 MYO3B    | K08834 |
| ENSG00000071991 | 5.13E-15 | -2.63127 | 1 | 1 CDH19    | K06806 |
| ENSG00000072041 | 5.13E-15 | -2.63127 | 1 | 1 SLC6A15  | K05048 |
| ENSG00000072080 | 5.13E-15 | -2.63127 | 1 | 1 SPP2     | -      |
| ENSG00000072133 | 5.13E-15 | -2.63127 | 1 | 1 RPS6KA6  | K04373 |
| ENSG00000072315 | 5.13E-15 | -2.63127 | 1 | 1 TRPC5    | K04968 |
| ENSG00000072444 | 5.13E-15 | -2.63127 | 1 | 1 ASAH2C   | K12349 |
| ENSG00000072506 | 5.13E-15 | -2.63127 | 1 | 1 HSD17B10 | K08683 |
| ENSG00000072657 | 5.13E-15 | -2.63127 | 1 | 1 TRHDE    | K01306 |
| ENSG00000072694 | 5.13E-15 | -2.63127 | 1 | 1 FCGR2B   | K12560 |
| ENSG00000073734 | 5.13E-15 | -2.63127 | 1 | 1 ABCB11   | K05664 |
| ENSG00000073754 | 5.13E-15 | -2.63127 | 1 | 1 CD5L     | -      |
| ENSG00000073861 | 5.13E-15 | -2.63127 | 1 | 1 TBX21    | K10166 |
| ENSG00000074211 | 5.13E-15 | -2.63127 | 1 | 1 PPP2R2C  | K04354 |
| ENSG00000074317 | 5.13E-15 | -2.63127 | 1 | 1 SNCB     | -      |
| ENSG00000074410 | 5.13E-15 | -2.63127 | 1 | 1 CA12     | K01672 |
| ENSG00000074706 | 5.13E-15 | -2.63127 | 1 | 1 IPCEF1   | -      |
| ENSG00000074771 | 5.13E-15 | -2.63127 | 1 | 1 NOX3     | K08008 |
| ENSG00000074803 | 5.13E-15 | -2.63127 | 1 | 1 SLC12A1  | K14425 |
| ENSG00000075035 | 5.13E-15 | -2.63127 | 1 | 1 WSCD2    | -      |
| ENSG00000075073 | 5.13E-15 | -2.63127 | 1 | 1 TACR2    | K04223 |
| ENSG00000075213 | 5.13E-15 | -2.63127 | 1 | 1 SEMA3A   | K06840 |
| ENSG00000075290 | 5.13E-15 | -2.63127 | 1 | 1 WNT8B    | K00714 |
| ENSG00000075340 | 5.13E-15 | -2.63127 | 1 | 1 ADD2     | K18622 |
| ENSG00000075388 | 5.13E-15 | -2.63127 | 1 | 1 FGF4     | K04358 |
| ENSG00000075429 | 5.13E-15 | -2.63127 | 1 | 1 CACNG5   | K04870 |
| ENSG00000075461 | 5.13E-15 | -2.63127 | 1 | 1 CACNG4   | K04869 |
| ENSG00000075673 | 5.13E-15 | -2.63127 | 1 | 1 ATP12A   | K01544 |
| ENSG00000075891 | 5.13E-15 | -2.63127 | 1 | 1 PAX2     | K15608 |
| ENSG00000076716 | 5.13E-15 | -2.63127 | 1 | 1 GPC4     | K08110 |
| ENSG00000077009 | 5.13E-15 | -2.63127 | 1 | 1 NMRK2    | K10524 |
| ENSG00000077264 | 5.13E-15 | -2.63127 | 1 | 1 PAK3     | K05733 |
| ENSG00000077274 | 5.13E-15 | -2.63127 | 1 | 1 CAPN6    | K08575 |
| ENSG00000077279 | 5.13E-15 | -2.63127 | 1 | 1 DCX      | K16579 |
| ENSG00000077498 | 5.13E-15 | -2.63127 | 1 | 1 TYR      | K00505 |
| ENSG00000077585 | 5.13E-15 | -2.63127 | 1 | 1 GPR137B  | -      |
| ENSG00000077800 | 5.13E-15 | -2.63127 | 1 | 1 FKBP6    | K09572 |
| ENSG00000077943 | 5.13E-15 | -2.63127 | 1 | 1 ITGA8    | K06584 |
| ENSG00000077984 | 5.13E-15 | -2.63127 | 1 | 1 CST7     | K13903 |
| ENSG00000078053 | 5.13E-15 | -2.63127 | 1 | 1 AMPH     | K12562 |
| ENSG00000078081 | 5.13E-15 | -2.63127 | 1 | 1 LAMP3    | K06562 |



|                 |          |          |   |              |        |
|-----------------|----------|----------|---|--------------|--------|
| ENSG00000078295 | 5.13E-15 | -2.63127 | 1 | 1 ADCY2      | K08042 |
| ENSG00000078328 | 5.13E-15 | -2.63127 | 1 | 1 RBFOX1     | K14946 |
| ENSG00000078549 | 5.13E-15 | -2.63127 | 1 | 1 ADCYAP1R1  | K04587 |
| ENSG00000078579 | 5.13E-15 | -2.63127 | 1 | 1 FGF20      | K04358 |
| ENSG00000078725 | 5.13E-15 | -2.63127 | 1 | 1 BRINP1     | -      |
| ENSG00000078898 | 5.13E-15 | -2.63127 | 1 | 1 BPIFB2     | -      |
| ENSG00000079102 | 5.13E-15 | -2.63127 | 1 | 1 RUNX1T1    | K10053 |
| ENSG00000079112 | 5.13E-15 | -2.63127 | 1 | 1 CDH17      | K06811 |
| ENSG00000079557 | 5.13E-15 | -2.63127 | 1 | 1 AFM        | -      |
| ENSG00000079689 | 5.13E-15 | -2.63127 | 1 | 1 SCGN       | -      |
| ENSG00000080224 | 5.13E-15 | -2.63127 | 1 | 1 EPHA6      | K05107 |
| ENSG00000080293 | 5.13E-15 | -2.63127 | 1 | 1 SCTR       | K04588 |
| ENSG00000080493 | 5.13E-15 | -2.63127 | 1 | 1 SLC4A4     | K13575 |
| ENSG00000080511 | 5.13E-15 | -2.63127 | 1 | 1 RDH8       | K11150 |
| ENSG00000080572 | 5.13E-15 | -2.63127 | 1 | 1 PIH1D3     | K12581 |
| ENSG00000080709 | 5.13E-15 | -2.63127 | 1 | 1 KCNN2      | K04943 |
| ENSG00000080910 | 5.13E-15 | -2.63127 | 1 | 1 CFHR2      | K04004 |
| ENSG00000081051 | 5.13E-15 | -2.63127 | 1 | 1 AFP        | K16144 |
| ENSG00000081189 | 5.13E-15 | -2.63127 | 1 | 1 MEF2C      | -      |
| ENSG00000081277 | 5.13E-15 | -2.63127 | 1 | 1 PKP1       | K10387 |
| ENSG00000081479 | 5.13E-15 | -2.63127 | 1 | 1 LRP2       | K06233 |
| ENSG00000081800 | 5.13E-15 | -2.63127 | 1 | 1 SLC13A1    | K14444 |
| ENSG00000081803 | 5.13E-15 | -2.63127 | 1 | 1 CADPS2     | -      |
| ENSG00000081818 | 5.13E-15 | -2.63127 | 1 | 1 PCDHB4     | K16494 |
| ENSG00000081842 | 5.13E-15 | -2.63127 | 1 | 1 PCDHA6     | K16493 |
| ENSG00000082175 | 5.13E-15 | -2.63127 | 1 | 1 PGR        | K08556 |
| ENSG00000082397 | 5.13E-15 | -2.63127 | 1 | 1 EPB41L3    | K06107 |
| ENSG00000082482 | 5.13E-15 | -2.63127 | 1 | 1 KCNK2      | K04913 |
| ENSG00000082556 | 5.13E-15 | -2.63127 | 1 | 1 OPRK1      | K04214 |
| ENSG00000082684 | 5.13E-15 | -2.63127 | 1 | 1 SEMA5B     | K06841 |
| ENSG00000082929 | 5.13E-15 | -2.63127 | 1 | 1 C4orf6     | -      |
| ENSG00000083622 | 5.13E-15 | -2.63127 | 1 | 1 AC000111.6 | -      |
| ENSG00000083782 | 5.13E-15 | -2.63127 | 1 | 1 EPYC       | K08127 |
| ENSG00000083842 | 5.13E-15 | -2.63127 | 1 | 1 ZNF8       | K09228 |
| ENSG00000083896 | 5.13E-15 | -2.63127 | 1 | 1 YTHDC1     | -      |
| ENSG00000084207 | 5.13E-15 | -2.63127 | 1 | 1 GSTP1      | K00799 |
| ENSG00000084674 | 5.13E-15 | -2.63127 | 1 | 1 APOB       | K14462 |
| ENSG00000084734 | 5.13E-15 | -2.63127 | 1 | 1 GCKR       | -      |
| ENSG00000085265 | 5.13E-15 | -2.63127 | 1 | 1 FCN1       | K10104 |
| ENSG00000086205 | 5.13E-15 | -2.63127 | 1 | 1 FOLH1      | K14592 |
| ENSG00000086288 | 5.13E-15 | -2.63127 | 1 | 1 NME8       | -      |
| ENSG00000086548 | 5.13E-15 | -2.63127 | 1 | 1 CEACAM6    | K06499 |
| ENSG00000086619 | 5.13E-15 | -2.63127 | 1 | 1 ERO1LB     | K10976 |
| ENSG00000086696 | 5.13E-15 | -2.63127 | 1 | 1 HSD17B2    | K13368 |
| ENSG00000086848 | 5.13E-15 | -2.63127 | 1 | 1 ALG9       | K03846 |
| ENSG00000086967 | 5.13E-15 | -2.63127 | 1 | 1 MYBPC2     | K12558 |
| ENSG00000087128 | 5.13E-15 | -2.63127 | 1 | 1 TMPRSS11E  | K09642 |
| ENSG00000087250 | 5.13E-15 | -2.63127 | 1 | 1 MT3        | K14740 |
| ENSG00000087494 | 5.13E-15 | -2.63127 | 1 | 1 PTHLH      | -      |
| ENSG00000087495 | 5.13E-15 | -2.63127 | 1 | 1 PHACTR3    | K17594 |
| ENSG00000088038 | 5.13E-15 | -2.63127 | 1 | 1 CNOT3      | K12580 |
| ENSG00000088053 | 5.13E-15 | -2.63127 | 1 | 1 GP6        | K06264 |
| ENSG00000088320 | 5.13E-15 | -2.63127 | 1 | 1 REM1       | K07847 |
| ENSG00000088386 | 5.13E-15 | -2.63127 | 1 | 1 SLC15A1    | K14206 |
| ENSG00000088782 | 5.13E-15 | -2.63127 | 1 | 1 DEFB127    | -      |
| ENSG00000088926 | 5.13E-15 | -2.63127 | 1 | 1 F11        | K01323 |
| ENSG00000089012 | 5.13E-15 | -2.63127 | 1 | 1 SIRPG      | K06551 |
| ENSG00000089041 | 5.13E-15 | -2.63127 | 1 | 1 P2RX7      | K05220 |

|                 |          |          |   |            |        |
|-----------------|----------|----------|---|------------|--------|
| ENSG00000089116 | 5.13E-15 | -2.63127 | 1 | 1 LHX5     | K18493 |
| ENSG00000089169 | 5.13E-15 | -2.63127 | 1 | 1 RPH3A    | -      |
| ENSG00000089199 | 5.13E-15 | -2.63127 | 1 | 1 CHGB     | -      |
| ENSG00000089225 | 5.13E-15 | -2.63127 | 1 | 1 TBX5     | K10179 |
| ENSG00000089250 | 5.13E-15 | -2.63127 | 1 | 1 NOS1     | -      |
| ENSG00000089472 | 5.13E-15 | -2.63127 | 1 | 1 HEPH     | K14735 |
| ENSG00000090104 | 5.13E-15 | -2.63127 | 1 | 1 RGS1     | K16449 |
| ENSG00000090382 | 5.13E-15 | -2.63127 | 1 | 1 LYZ      | K13915 |
| ENSG00000090402 | 5.13E-15 | -2.63127 | 1 | 1 SI       | K01203 |
| ENSG00000090512 | 5.13E-15 | -2.63127 | 1 | 1 FETUB    | -      |
| ENSG00000090659 | 5.13E-15 | -2.63127 | 1 | 1 CD209    | K06563 |
| ENSG00000091010 | 5.13E-15 | -2.63127 | 1 | 1 POU4F3   | K09366 |
| ENSG00000091128 | 5.13E-15 | -2.63127 | 1 | 1 LAMB4    | K06245 |
| ENSG00000091129 | 5.13E-15 | -2.63127 | 1 | 1 NRCAM    | K06756 |
| ENSG00000091138 | 5.13E-15 | -2.63127 | 1 | 1 SLC26A3  | K14078 |
| ENSG00000091181 | 5.13E-15 | -2.63127 | 1 | 1 IL5RA    | K05067 |
| ENSG00000091583 | 5.13E-15 | -2.63127 | 1 | 1 APOH     | K17305 |
| ENSG00000091664 | 5.13E-15 | -2.63127 | 1 | 1 SLC17A6  | K12302 |
| ENSG00000091704 | 5.13E-15 | -2.63127 | 1 | 1 CPA1     | K08779 |
| ENSG00000092009 | 5.13E-15 | -2.63127 | 1 | 1 CMA1     | K01329 |
| ENSG00000092051 | 5.13E-15 | -2.63127 | 1 | 1 JPH4     | K19530 |
| ENSG00000092054 | 5.13E-15 | -2.63127 | 1 | 1 MYH7     | K17751 |
| ENSG00000092096 | 5.13E-15 | -2.63127 | 1 | 1 SLC22A17 | K08213 |
| ENSG00000092345 | 5.13E-15 | -2.63127 | 1 | 1 DAZL     | -      |
| ENSG00000092377 | 5.13E-15 | -2.63127 | 1 | 1 TBL1Y    | K04508 |
| ENSG00000092607 | 5.13E-15 | -2.63127 | 1 | 1 TBX15    | K10182 |
| ENSG00000093072 | 5.13E-15 | -2.63127 | 1 | 1 CECR1    | K19572 |
| ENSG00000094661 | 5.13E-15 | -2.63127 | 1 | 1 OR11I    | K04257 |
| ENSG00000094755 | 5.13E-15 | -2.63127 | 1 | 1 GABRP    | K05189 |
| ENSG00000094796 | 5.13E-15 | -2.63127 | 1 | 1 KRT31    | K07604 |
| ENSG00000094963 | 5.13E-15 | -2.63127 | 1 | 1 FMO2     | K00485 |
| ENSG00000095110 | 5.13E-15 | -2.63127 | 1 | 1 NXPE1    | -      |
| ENSG00000095585 | 5.13E-15 | -2.63127 | 1 | 1 BLNK     | K07371 |
| ENSG00000095627 | 5.13E-15 | -2.63127 | 1 | 1 TDRD1    | K18405 |
| ENSG00000095713 | 5.13E-15 | -2.63127 | 1 | 1 CRTAC1   | -      |
| ENSG00000095777 | 5.13E-15 | -2.63127 | 1 | 1 MYO3A    | K08834 |
| ENSG00000095917 | 5.13E-15 | -2.63127 | 1 | 1 TPSD1    | K01340 |
| ENSG00000095932 | 5.13E-15 | -2.63127 | 1 | 1 C19orf77 | -      |
| ENSG00000095970 | 5.13E-15 | -2.63127 | 1 | 1 TREM2    | K14378 |
| ENSG00000095981 | 5.13E-15 | -2.63127 | 1 | 1 KCNK16   | K04924 |
| ENSG00000096006 | 5.13E-15 | -2.63127 | 1 | 1 CRISP3   | -      |
| ENSG00000096088 | 5.13E-15 | -2.63127 | 1 | 1 PGC      | K01377 |
| ENSG00000096264 | 5.13E-15 | -2.63127 | 1 | 1 NCR2     | K06742 |
| ENSG00000096395 | 5.13E-15 | -2.63127 | 1 | 1 MLN      | K05265 |
| ENSG00000099139 | 5.13E-15 | -2.63127 | 1 | 1 PCSK5    | K08654 |
| ENSG00000099284 | 5.13E-15 | -2.63127 | 1 | 1 H2AFY2   | K11251 |
| ENSG00000099715 | 5.13E-15 | -2.63127 | 1 | 1 PCDH11Y  | K16498 |
| ENSG00000099721 | 5.13E-15 | -2.63127 | 1 | 1 AMELY    | -      |
| ENSG00000099725 | 5.13E-15 | -2.63127 | 1 | 1 PRKY     | K19584 |
| ENSG00000099869 | 5.13E-15 | -2.63127 | 1 | 1 IGF2-AS  | -      |
| ENSG00000099953 | 5.13E-15 | -2.63127 | 1 | 1 MMP11    | K07993 |
| ENSG00000100012 | 5.13E-15 | -2.63127 | 1 | 1 SEC14L3  | -      |
| ENSG00000100024 | 5.13E-15 | -2.63127 | 1 | 1 UPB1     | K01431 |
| ENSG00000100095 | 5.13E-15 | -2.63127 | 1 | 1 SEZ6L    | -      |
| ENSG00000100121 | 5.13E-15 | -2.63127 | 1 | 1 GGTL2    | K18592 |
| ENSG00000100122 | 5.13E-15 | -2.63127 | 1 | 1 CRYBB1   | -      |
| ENSG00000100170 | 5.13E-15 | -2.63127 | 1 | 1 SLC5A1   | K14158 |
| ENSG00000100181 | 5.13E-15 | -2.63127 | 1 | 1 TPTEP1   | -      |

|                 |          |          |   |              |        |
|-----------------|----------|----------|---|--------------|--------|
| ENSG00000100191 | 5.13E-15 | -2.63127 | 1 | 1 SLC5A4     | K14384 |
| ENSG00000100218 | 5.13E-15 | -2.63127 | 1 | 1 RTDR1      | -      |
| ENSG00000100228 | 5.13E-15 | -2.63127 | 1 | 1 RAB36      | K07922 |
| ENSG00000100249 | 5.13E-15 | -2.63127 | 1 | 1 C22orf31   | -      |
| ENSG00000100312 | 5.13E-15 | -2.63127 | 1 | 1 ACR        | K01317 |
| ENSG00000100321 | 5.13E-15 | -2.63127 | 1 | 1 SYNGR1     | K04403 |
| ENSG00000100336 | 5.13E-15 | -2.63127 | 1 | 1 APOL4      | K14480 |
| ENSG00000100341 | 5.13E-15 | -2.63127 | 1 | 1 PNPLA5     | K16814 |
| ENSG00000100346 | 5.13E-15 | -2.63127 | 1 | 1 CACNA1I    | K04856 |
| ENSG00000100365 | 5.13E-15 | -2.63127 | 1 | 1 NCF4       | K08012 |
| ENSG00000100373 | 5.13E-15 | -2.63127 | 1 | 1 UPK3A      | K19520 |
| ENSG00000100379 | 5.13E-15 | -2.63127 | 1 | 1 KCTD17     | -      |
| ENSG00000100433 | 5.13E-15 | -2.63127 | 1 | 1 KCNK10     | K04920 |
| ENSG00000100448 | 5.13E-15 | -2.63127 | 1 | 1 CTSG       | K01319 |
| ENSG00000100450 | 5.13E-15 | -2.63127 | 1 | 1 GZMH       | K09616 |
| ENSG00000100453 | 5.13E-15 | -2.63127 | 1 | 1 GZMB       | K01353 |
| ENSG00000100557 | 5.13E-15 | -2.63127 | 1 | 1 C14orf105  | -      |
| ENSG00000100565 | 5.13E-15 | -2.63127 | 1 | 1 C14orf166B | -      |
| ENSG00000100593 | 5.13E-15 | -2.63127 | 1 | 1 ISM2       | -      |
| ENSG00000100599 | 5.13E-15 | -2.63127 | 1 | 1 RIN3       | -      |
| ENSG00000100626 | 5.13E-15 | -2.63127 | 1 | 1 GALNT16    | K00710 |
| ENSG00000100665 | 5.13E-15 | -2.63127 | 1 | 1 SERPINA4   | K04525 |
| ENSG00000100721 | 5.13E-15 | -2.63127 | 1 | 1 TCL1A      | K10167 |
| ENSG00000100884 | 5.13E-15 | -2.63127 | 1 | 1 CPNE6      | -      |
| ENSG00000100987 | 5.13E-15 | -2.63127 | 1 | 1 VSX1       | K09335 |
| ENSG00000101074 | 5.13E-15 | -2.63127 | 1 | 1 R3HDML     | -      |
| ENSG00000101134 | 5.13E-15 | -2.63127 | 1 | 1 DOK5       | -      |
| ENSG00000101144 | 5.13E-15 | -2.63127 | 1 | 1 BMP7       | K16621 |
| ENSG00000101180 | 5.13E-15 | -2.63127 | 1 | 1 HRH3       | K04151 |
| ENSG00000101194 | 5.13E-15 | -2.63127 | 1 | 1 SLC17A9    | K12303 |
| ENSG00000101200 | 5.13E-15 | -2.63127 | 1 | 1 AVP        | K05242 |
| ENSG00000101251 | 5.13E-15 | -2.63127 | 1 | 1 SEL1L2     | K14026 |
| ENSG00000101265 | 5.13E-15 | -2.63127 | 1 | 1 RASSF2     | K09851 |
| ENSG00000101282 | 5.13E-15 | -2.63127 | 1 | 1 RSPO4      | -      |
| ENSG00000101292 | 5.13E-15 | -2.63127 | 1 | 1 PROKR2     | K08380 |
| ENSG00000101307 | 5.13E-15 | -2.63127 | 1 | 1 SIRPB1     | K06551 |
| ENSG00000101323 | 5.13E-15 | -2.63127 | 1 | 1 HAO1       | K11517 |
| ENSG00000101327 | 5.13E-15 | -2.63127 | 1 | 1 PDYN       | K15840 |
| ENSG00000101349 | 5.13E-15 | -2.63127 | 1 | 1 PAK7       | K05736 |
| ENSG00000101405 | 5.13E-15 | -2.63127 | 1 | 1 OXT        | K05243 |
| ENSG00000101425 | 5.13E-15 | -2.63127 | 1 | 1 BPI        | -      |
| ENSG00000101435 | 5.13E-15 | -2.63127 | 1 | 1 CST9L      | K13905 |
| ENSG00000101438 | 5.13E-15 | -2.63127 | 1 | 1 SLC32A1    | K15015 |
| ENSG00000101441 | 5.13E-15 | -2.63127 | 1 | 1 CST4       | K13900 |
| ENSG00000101445 | 5.13E-15 | -2.63127 | 1 | 1 PPP1R16B   | K17459 |
| ENSG00000101446 | 5.13E-15 | -2.63127 | 1 | 1 SPINT3     | -      |
| ENSG00000101448 | 5.13E-15 | -2.63127 | 1 | 1 EPPIN      | -      |
| ENSG00000101463 | 5.13E-15 | -2.63127 | 1 | 1 SYNDIG1    | -      |
| ENSG00000101489 | 5.13E-15 | -2.63127 | 1 | 1 CELF4      | K13207 |
| ENSG00000101493 | 5.13E-15 | -2.63127 | 1 | 1 ZNF516     | -      |
| ENSG00000101746 | 5.13E-15 | -2.63127 | 1 | 1 NOL4       | -      |
| ENSG00000101812 | 5.13E-15 | -2.63127 | 1 | 1 H2BFM      | K11252 |
| ENSG00000101825 | 5.13E-15 | -2.63127 | 1 | 1 MXRA5      | -      |
| ENSG00000101883 | 5.13E-15 | -2.63127 | 1 | 1 RHOXF1     | -      |
| ENSG00000101892 | 5.13E-15 | -2.63127 | 1 | 1 ATP1B4     | K01540 |
| ENSG00000101938 | 5.13E-15 | -2.63127 | 1 | 1 CHRDL1     | -      |
| ENSG00000101940 | 5.13E-15 | -2.63127 | 1 | 1 WDR13      | -      |
| ENSG00000101951 | 5.13E-15 | -2.63127 | 1 | 1 PAGE4      | -      |

|                 |          |          |   |                 |        |
|-----------------|----------|----------|---|-----------------|--------|
| ENSG00000101958 | 5.13E-15 | -2.63127 | 1 | 1 GLRA2         | K05194 |
| ENSG00000101981 | 5.13E-15 | -2.63127 | 1 | 1 F9            | K01321 |
| ENSG00000102001 | 5.13E-15 | -2.63127 | 1 | 1 CACNA1F       | K04853 |
| ENSG00000102021 | 5.13E-15 | -2.63127 | 1 | 1 LUZP4         | -      |
| ENSG00000102043 | 5.13E-15 | -2.63127 | 1 | 1 MTMR8         | K18083 |
| ENSG00000102055 | 5.13E-15 | -2.63127 | 1 | 1 PPP1R2P9      | K16833 |
| ENSG00000102069 | 5.13E-15 | -2.63127 | 1 | 1 UBE2NL        | K10580 |
| ENSG00000102076 | 5.13E-15 | -2.63127 | 1 | 1 OPN1LW        | K04251 |
| ENSG00000102080 | 5.13E-15 | -2.63127 | 1 | 1 TEX28P2       | -      |
| ENSG00000102096 | 5.13E-15 | -2.63127 | 1 | 1 PIM2          | K08806 |
| ENSG00000102109 | 5.13E-15 | -2.63127 | 1 | 1 PCSK1N        | -      |
| ENSG00000102128 | 5.13E-15 | -2.63127 | 1 | 1 RAB40AL       | K07928 |
| ENSG00000102145 | 5.13E-15 | -2.63127 | 1 | 1 GATA1         | K09182 |
| ENSG00000102230 | 5.13E-15 | -2.63127 | 1 | 1 PCYT1B        | K00968 |
| ENSG00000102239 | 5.13E-15 | -2.63127 | 1 | 1 BRS3          | K04170 |
| ENSG00000102243 | 5.13E-15 | -2.63127 | 1 | 1 VGLL1         | -      |
| ENSG00000102245 | 5.13E-15 | -2.63127 | 1 | 1 CD40LG        | K03161 |
| ENSG00000102290 | 5.13E-15 | -2.63127 | 1 | 1 PCDH11X       | K16498 |
| ENSG00000102313 | 5.13E-15 | -2.63127 | 1 | 1 ITIH6         | -      |
| ENSG00000102349 | 5.13E-15 | -2.63127 | 1 | 1 KLF8          | K09205 |
| ENSG00000102383 | 5.13E-15 | -2.63127 | 1 | 1 ZDHHC15       | K18932 |
| ENSG00000102387 | 5.13E-15 | -2.63127 | 1 | 1 TAF7L         | K03132 |
| ENSG00000102390 | 5.13E-15 | -2.63127 | 1 | 1 PBDC1         | -      |
| ENSG00000102401 | 5.13E-15 | -2.63127 | 1 | 1 ARM CX3       | -      |
| ENSG00000102409 | 5.13E-15 | -2.63127 | 1 | 1 BEX4          | -      |
| ENSG00000102445 | 5.13E-15 | -2.63127 | 1 | 1 KIAA0226L     | -      |
| ENSG00000102468 | 5.13E-15 | -2.63127 | 1 | 1 HTR2A         | K04157 |
| ENSG00000102524 | 5.13E-15 | -2.63127 | 1 | 1 TNFSF13B      | K05476 |
| ENSG00000102683 | 5.13E-15 | -2.63127 | 1 | 1 SGCG          | K12564 |
| ENSG00000102755 | 5.13E-15 | -2.63127 | 1 | 1 FLT1          | K05096 |
| ENSG00000102760 | 5.13E-15 | -2.63127 | 1 | 1 RGCC          | -      |
| ENSG00000102794 | 5.13E-15 | -2.63127 | 1 | 1 IRG1          | K17724 |
| ENSG00000102891 | 5.13E-15 | -2.63127 | 1 | 1 MT4           | K14741 |
| ENSG00000102924 | 5.13E-15 | -2.63127 | 1 | 1 CBLN1         | -      |
| ENSG00000102935 | 5.13E-15 | -2.63127 | 1 | 1 ZNF423        | -      |
| ENSG00000102962 | 5.13E-15 | -2.63127 | 1 | 1 CCL22         | K05514 |
| ENSG00000103023 | 5.13E-15 | -2.63127 | 1 | 1 PRSS54        | -      |
| ENSG00000103154 | 5.13E-15 | -2.63127 | 1 | 1 NECAB2        | -      |
| ENSG00000103200 | 5.13E-15 | -2.63127 | 1 | 1 RP11-723C11.2 | -      |
| ENSG00000103310 | 5.13E-15 | -2.63127 | 1 | 1 ZP2           | -      |
| ENSG00000103355 | 5.13E-15 | -2.63127 | 1 | 1 PRSS33        | K09629 |
| ENSG00000103375 | 5.13E-15 | -2.63127 | 1 | 1 AQP8          | K09869 |
| ENSG00000103426 | 5.13E-15 | -2.63127 | 1 | 1 CORO7-PAM16   | K18619 |
| ENSG00000103449 | 5.13E-15 | -2.63127 | 1 | 1 SALL1         | -      |
| ENSG00000103460 | 5.13E-15 | -2.63127 | 1 | 1 TOX3          | -      |
| ENSG00000103489 | 5.13E-15 | -2.63127 | 1 | 1 XYLT1         | K00771 |
| ENSG00000103546 | 5.13E-15 | -2.63127 | 1 | 1 SLC6A2        | K05035 |
| ENSG00000103569 | 5.13E-15 | -2.63127 | 1 | 1 AQP9          | K09877 |
| ENSG00000103647 | 5.13E-15 | -2.63127 | 1 | 1 CORO2B        | K13887 |
| ENSG00000104044 | 5.13E-15 | -2.63127 | 1 | 1 OCA2          | -      |
| ENSG00000104055 | 5.13E-15 | -2.63127 | 1 | 1 TGM5          | K05622 |
| ENSG00000104059 | 5.13E-15 | -2.63127 | 1 | 1 FAM189A1      | -      |
| ENSG00000104112 | 5.13E-15 | -2.63127 | 1 | 1 SCG3          | -      |
| ENSG00000104267 | 5.13E-15 | -2.63127 | 1 | 1 CA2           | K18245 |
| ENSG00000104332 | 5.13E-15 | -2.63127 | 1 | 1 SFRP1         | K02166 |
| ENSG00000104371 | 5.13E-15 | -2.63127 | 1 | 1 DKK4          | K02165 |
| ENSG00000104415 | 5.13E-15 | -2.63127 | 1 | 1 WISP1         | -      |
| ENSG00000104435 | 5.13E-15 | -2.63127 | 1 | 1 STMN2         | K04381 |

|                 |          |          |   |            |        |
|-----------------|----------|----------|---|------------|--------|
| ENSG00000104499 | 5.13E-15 | -2.63127 | 1 | 1 GML      | -      |
| ENSG00000104722 | 5.13E-15 | -2.63127 | 1 | 1 NEFM     | K04573 |
| ENSG00000104725 | 5.13E-15 | -2.63127 | 1 | 1 NEFL     | -      |
| ENSG00000104755 | 5.13E-15 | -2.63127 | 1 | 1 ADAM2    | K06833 |
| ENSG00000104818 | 5.13E-15 | -2.63127 | 1 | 1 CGB2     | K10045 |
| ENSG00000104826 | 5.13E-15 | -2.63127 | 1 | 1 LHB      | K08521 |
| ENSG00000104827 | 5.13E-15 | -2.63127 | 1 | 1 CGB      | K10045 |
| ENSG00000104833 | 5.13E-15 | -2.63127 | 1 | 1 TUBB4A   | K07375 |
| ENSG00000104903 | 5.13E-15 | -2.63127 | 1 | 1 LYL1     | K15604 |
| ENSG00000104918 | 5.13E-15 | -2.63127 | 1 | 1 RETN     | K13438 |
| ENSG00000104938 | 5.13E-15 | -2.63127 | 1 | 1 CLEC4M   | K06563 |
| ENSG00000104967 | 5.13E-15 | -2.63127 | 1 | 1 NOVA2    | K14944 |
| ENSG00000104970 | 5.13E-15 | -2.63127 | 1 | 1 KIR3DX1  | K06725 |
| ENSG00000104972 | 5.13E-15 | -2.63127 | 1 | 1 LILRB1   | K06512 |
| ENSG00000104974 | 5.13E-15 | -2.63127 | 1 | 1 LILRA1   | K06512 |
| ENSG00000105143 | 5.13E-15 | -2.63127 | 1 | 1 SLC1A6   | K05617 |
| ENSG00000105198 | 5.13E-15 | -2.63127 | 1 | 1 LGALS13  | K10096 |
| ENSG00000105205 | 5.13E-15 | -2.63127 | 1 | 1 CLC      | K13334 |
| ENSG00000105352 | 5.13E-15 | -2.63127 | 1 | 1 CEACAM4  | K06499 |
| ENSG00000105369 | 5.13E-15 | -2.63127 | 1 | 1 CD79A    | K06506 |
| ENSG00000105371 | 5.13E-15 | -2.63127 | 1 | 1 ICAM4    | K06581 |
| ENSG00000105388 | 5.13E-15 | -2.63127 | 1 | 1 CEACAM5  | K06499 |
| ENSG00000105392 | 5.13E-15 | -2.63127 | 1 | 1 CRX      | -      |
| ENSG00000105398 | 5.13E-15 | -2.63127 | 1 | 1 SULT2A1  | K11822 |
| ENSG00000105428 | 5.13E-15 | -2.63127 | 1 | 1 ZNRF4    | K15715 |
| ENSG00000105472 | 5.13E-15 | -2.63127 | 1 | 1 CLEC11A  | K17521 |
| ENSG00000105492 | 5.13E-15 | -2.63127 | 1 | 1 SIGLEC6  | K06738 |
| ENSG00000105501 | 5.13E-15 | -2.63127 | 1 | 1 SIGLEC5  | K06549 |
| ENSG00000105507 | 5.13E-15 | -2.63127 | 1 | 1 CABP5    | -      |
| ENSG00000105609 | 5.13E-15 | -2.63127 | 1 | 1 LILRB5   | K06512 |
| ENSG00000105610 | 5.13E-15 | -2.63127 | 1 | 1 KLF1     | K09204 |
| ENSG00000105617 | 5.13E-15 | -2.63127 | 1 | 1 LENG1    | K12580 |
| ENSG00000105618 | 5.13E-15 | -2.63127 | 1 | 1 PRPF31   | K12844 |
| ENSG00000105619 | 5.13E-15 | -2.63127 | 1 | 1 TFPT     | K11670 |
| ENSG00000105675 | 5.13E-15 | -2.63127 | 1 | 1 ATP4A    | K01542 |
| ENSG00000105694 | 5.13E-15 | -2.63127 | 1 | 1 TCEB1P28 | K03872 |
| ENSG00000105750 | 5.13E-15 | -2.63127 | 1 | 1 ZNF85    | K09228 |
| ENSG00000105825 | 5.13E-15 | -2.63127 | 1 | 1 TFPI2    | -      |
| ENSG00000105851 | 5.13E-15 | -2.63127 | 1 | 1 PIK3CG   | K00922 |
| ENSG00000105852 | 5.13E-15 | -2.63127 | 1 | 1 PON3     | K01045 |
| ENSG00000105880 | 5.13E-15 | -2.63127 | 1 | 1 DLX5     | K18489 |
| ENSG00000105889 | 5.13E-15 | -2.63127 | 1 | 1 STEAP1B  | K14737 |
| ENSG00000105894 | 5.13E-15 | -2.63127 | 1 | 1 PTN      | K16642 |
| ENSG00000105954 | 5.13E-15 | -2.63127 | 1 | 1 NPVF     | -      |
| ENSG00000105989 | 5.13E-15 | -2.63127 | 1 | 1 WNT2     | K00182 |
| ENSG00000106013 | 5.13E-15 | -2.63127 | 1 | 1 ANKRD7   | -      |
| ENSG00000106038 | 5.13E-15 | -2.63127 | 1 | 1 EVX1     | K09320 |
| ENSG00000106066 | 5.13E-15 | -2.63127 | 1 | 1 CPVL     | K09645 |
| ENSG00000106113 | 5.13E-15 | -2.63127 | 1 | 1 CRHR2    | K04579 |
| ENSG00000106123 | 5.13E-15 | -2.63127 | 1 | 1 EPHB6    | K05114 |
| ENSG00000106128 | 5.13E-15 | -2.63127 | 1 | 1 GHRHR    | K04584 |
| ENSG00000106178 | 5.13E-15 | -2.63127 | 1 | 1 CCL24    | K05514 |
| ENSG00000106236 | 5.13E-15 | -2.63127 | 1 | 1 NPTX2    | -      |
| ENSG00000106278 | 5.13E-15 | -2.63127 | 1 | 1 PTPRZ1   | K08114 |
| ENSG00000106304 | 5.13E-15 | -2.63127 | 1 | 1 SPAM1    | K01197 |
| ENSG00000106328 | 5.13E-15 | -2.63127 | 1 | 1 FSCN3    | K17456 |
| ENSG00000106331 | 5.13E-15 | -2.63127 | 1 | 1 PAX4     | K08032 |
| ENSG00000106341 | 5.13E-15 | -2.63127 | 1 | 1 PPP1R17  | K08067 |

|                 |          |          |   |              |        |
|-----------------|----------|----------|---|--------------|--------|
| ENSG00000106410 | 5.13E-15 | -2.63127 | 1 | 1 NOBOX      | -      |
| ENSG00000106511 | 5.13E-15 | -2.63127 | 1 | 1 MEOX2      | K09322 |
| ENSG00000106536 | 5.13E-15 | -2.63127 | 1 | 1 POU6F2     | K09368 |
| ENSG00000106540 | 5.13E-15 | -2.63127 | 1 | 1 AC004837.3 | -      |
| ENSG00000106565 | 5.13E-15 | -2.63127 | 1 | 1 TMEM176B   | -      |
| ENSG00000106648 | 5.13E-15 | -2.63127 | 1 | 1 GALNTL5    | K00710 |
| ENSG00000106688 | 5.13E-15 | -2.63127 | 1 | 1 SLC1A1     | K05612 |
| ENSG00000106714 | 5.13E-15 | -2.63127 | 1 | 1 CNTNAP3    | -      |
| ENSG00000106772 | 5.13E-15 | -2.63127 | 1 | 1 PRUNE2     | K18449 |
| ENSG00000106952 | 5.13E-15 | -2.63127 | 1 | 1 TNFSF8     | K05471 |
| ENSG00000107014 | 5.13E-15 | -2.63127 | 1 | 1 RLN2       | K05255 |
| ENSG00000107018 | 5.13E-15 | -2.63127 | 1 | 1 RLN1       | K05255 |
| ENSG00000107130 | 5.13E-15 | -2.63127 | 1 | 1 NCS1       | -      |
| ENSG00000107187 | 5.13E-15 | -2.63127 | 1 | 1 LHX3       | K09374 |
| ENSG00000107249 | 5.13E-15 | -2.63127 | 1 | 1 GLIS3      | K09232 |
| ENSG00000107282 | 5.13E-15 | -2.63127 | 1 | 1 APBA1      | K04531 |
| ENSG00000107447 | 5.13E-15 | -2.63127 | 1 | 1 DNNT       | K00977 |
| ENSG00000107518 | 5.13E-15 | -2.63127 | 1 | 1 ATRNL1     | -      |
| ENSG00000107562 | 5.13E-15 | -2.63127 | 1 | 1 CXCL12     | K10031 |
| ENSG00000107618 | 5.13E-15 | -2.63127 | 1 | 1 RBP3       | -      |
| ENSG00000107623 | 5.13E-15 | -2.63127 | 1 | 1 GDF10      | K05496 |
| ENSG00000107719 | 5.13E-15 | -2.63127 | 1 | 1 PALD1      | -      |
| ENSG00000107807 | 5.13E-15 | -2.63127 | 1 | 1 TLX1       | K09340 |
| ENSG00000108001 | 5.13E-15 | -2.63127 | 1 | 1 EBF3       | K09103 |
| ENSG00000108231 | 5.13E-15 | -2.63127 | 1 | 1 LGI1       | -      |
| ENSG00000108242 | 5.13E-15 | -2.63127 | 1 | 1 CYP2C18    | K17720 |
| ENSG00000108244 | 5.13E-15 | -2.63127 | 1 | 1 KRT23      | K07604 |
| ENSG00000108342 | 5.13E-15 | -2.63127 | 1 | 1 CSF3       | K05423 |
| ENSG00000108381 | 5.13E-15 | -2.63127 | 1 | 1 ASPA       | K01437 |
| ENSG00000108417 | 5.13E-15 | -2.63127 | 1 | 1 KRT37      | K07604 |
| ENSG00000108442 | 5.13E-15 | -2.63127 | 1 | 1 TVP23BP2   | -      |
| ENSG00000108516 | 5.13E-15 | -2.63127 | 1 | 1 AC003958.6 | -      |
| ENSG00000108576 | 5.13E-15 | -2.63127 | 1 | 1 SLC6A4     | K05037 |
| ENSG00000108684 | 5.13E-15 | -2.63127 | 1 | 1 ASIC2      | K04828 |
| ENSG00000108688 | 5.13E-15 | -2.63127 | 1 | 1 CCL7       | K05509 |
| ENSG00000108700 | 5.13E-15 | -2.63127 | 1 | 1 CCL8       | K16596 |
| ENSG00000108702 | 5.13E-15 | -2.63127 | 1 | 1 CCL1       | K05514 |
| ENSG00000108753 | 5.13E-15 | -2.63127 | 1 | 1 HNF1B      | K08034 |
| ENSG00000108759 | 5.13E-15 | -2.63127 | 1 | 1 KRT32      | K07604 |
| ENSG00000108798 | 5.13E-15 | -2.63127 | 1 | 1 ABI3       | -      |
| ENSG00000108830 | 5.13E-15 | -2.63127 | 1 | 1 RND2       | K07858 |
| ENSG00000108878 | 5.13E-15 | -2.63127 | 1 | 1 CACNG1     | K04866 |
| ENSG00000108932 | 5.13E-15 | -2.63127 | 1 | 1 SLC16A6    | K08183 |
| ENSG00000109079 | 5.13E-15 | -2.63127 | 1 | 1 TNFAIP1    | K15074 |
| ENSG00000109132 | 5.13E-15 | -2.63127 | 1 | 1 PHOX2B     | K09330 |
| ENSG00000109158 | 5.13E-15 | -2.63127 | 1 | 1 GABRA4     | K05175 |
| ENSG00000109181 | 5.13E-15 | -2.63127 | 1 | 1 UGT2B10    | K00699 |
| ENSG00000109182 | 5.13E-15 | -2.63127 | 1 | 1 CWH43      | -      |
| ENSG00000109193 | 5.13E-15 | -2.63127 | 1 | 1 SULT1E1    | K01016 |
| ENSG00000109205 | 5.13E-15 | -2.63127 | 1 | 1 ODAM       | -      |
| ENSG00000109208 | 5.13E-15 | -2.63127 | 1 | 1 SMR3A      | -      |
| ENSG00000109255 | 5.13E-15 | -2.63127 | 1 | 1 NMU        | K05249 |
| ENSG00000109272 | 5.13E-15 | -2.63127 | 1 | 1 PF4V1      | K05407 |
| ENSG00000109424 | 5.13E-15 | -2.63127 | 1 | 1 UCP1       | K08769 |
| ENSG00000109471 | 5.13E-15 | -2.63127 | 1 | 1 IL2        | K05429 |
| ENSG00000109576 | 5.13E-15 | -2.63127 | 1 | 1 AADAT      | K00825 |
| ENSG00000109667 | 5.13E-15 | -2.63127 | 1 | 1 SLC2A9     | K08146 |
| ENSG00000109684 | 5.13E-15 | -2.63127 | 1 | 1 CLNK       | K15696 |

|                 |          |          |   |            |        |
|-----------------|----------|----------|---|------------|--------|
| ENSG00000109705 | 5.13E-15 | -2.63127 | 1 | 1 NKX3-2   | K09995 |
| ENSG00000109794 | 5.13E-15 | -2.63127 | 1 | 1 FAM149A  | -      |
| ENSG00000109832 | 5.13E-15 | -2.63127 | 1 | 1 DDX25    | K18656 |
| ENSG00000109846 | 5.13E-15 | -2.63127 | 1 | 1 CRYAB    | K09542 |
| ENSG00000109851 | 5.13E-15 | -2.63127 | 1 | 1 DBX1     | K18488 |
| ENSG00000109906 | 5.13E-15 | -2.63127 | 1 | 1 ZBTB16   | K10055 |
| ENSG00000109943 | 5.13E-15 | -2.63127 | 1 | 1 CRTAM    | K16361 |
| ENSG00000109944 | 5.13E-15 | -2.63127 | 1 | 1 C11orf63 | -      |
| ENSG00000109956 | 5.13E-15 | -2.63127 | 1 | 1 B3GAT1   | K00735 |
| ENSG00000110077 | 5.13E-15 | -2.63127 | 1 | 1 MS4A6A   | -      |
| ENSG00000110079 | 5.13E-15 | -2.63127 | 1 | 1 MS4A4A   | -      |
| ENSG00000110148 | 5.13E-15 | -2.63127 | 1 | 1 CCKBR    | K04195 |
| ENSG00000110244 | 5.13E-15 | -2.63127 | 1 | 1 APOA4    | K08760 |
| ENSG00000110245 | 5.13E-15 | -2.63127 | 1 | 1 APOC3    | K08759 |
| ENSG00000110324 | 5.13E-15 | -2.63127 | 1 | 1 IL10RA   | K05134 |
| ENSG00000110347 | 5.13E-15 | -2.63127 | 1 | 1 MMP12    | -      |
| ENSG00000110448 | 5.13E-15 | -2.63127 | 1 | 1 CD5      | K06455 |
| ENSG00000110484 | 5.13E-15 | -2.63127 | 1 | 1 SCGB2A2  | -      |
| ENSG00000110665 | 5.13E-15 | -2.63127 | 1 | 1 C11orf21 | -      |
| ENSG00000110675 | 5.13E-15 | -2.63127 | 1 | 1 ELMOD1   | -      |
| ENSG00000110680 | 5.13E-15 | -2.63127 | 1 | 1 CALCA    | K12332 |
| ENSG00000110777 | 5.13E-15 | -2.63127 | 1 | 1 POU2AF1  | -      |
| ENSG00000110786 | 5.13E-15 | -2.63127 | 1 | 1 PTPN5    | K18018 |
| ENSG00000110811 | 5.13E-15 | -2.63127 | 1 | 1 LEPREL2  | -      |
| ENSG00000110848 | 5.13E-15 | -2.63127 | 1 | 1 CD69     | K06502 |
| ENSG00000110934 | 5.13E-15 | -2.63127 | 1 | 1 BIN2     | -      |
| ENSG00000110975 | 5.13E-15 | -2.63127 | 1 | 1 SYT10    | -      |
| ENSG00000111046 | 5.13E-15 | -2.63127 | 1 | 1 MYF6     | K18485 |
| ENSG00000111049 | 5.13E-15 | -2.63127 | 1 | 1 MYF5     | K18484 |
| ENSG00000111052 | 5.13E-15 | -2.63127 | 1 | 1 LIN7A    | -      |
| ENSG00000111058 | 5.13E-15 | -2.63127 | 1 | 1 ACSS3    | K01908 |
| ENSG00000111199 | 5.13E-15 | -2.63127 | 1 | 1 TRPV4    | K04973 |
| ENSG00000111224 | 5.13E-15 | -2.63127 | 1 | 1 PARP11   | K15259 |
| ENSG00000111241 | 5.13E-15 | -2.63127 | 1 | 1 FGF6     | K04358 |
| ENSG00000111245 | 5.13E-15 | -2.63127 | 1 | 1 MYL2     | K10351 |
| ENSG00000111249 | 5.13E-15 | -2.63127 | 1 | 1 CUX2     | K09313 |
| ENSG00000111262 | 5.13E-15 | -2.63127 | 1 | 1 KCNA1    | K04874 |
| ENSG00000111344 | 5.13E-15 | -2.63127 | 1 | 1 RASAL1   | K17632 |
| ENSG00000111404 | 5.13E-15 | -2.63127 | 1 | 1 RERGL    | K17198 |
| ENSG00000111536 | 5.13E-15 | -2.63127 | 1 | 1 IL26     | K05446 |
| ENSG00000111537 | 5.13E-15 | -2.63127 | 1 | 1 IFNG     | K04687 |
| ENSG00000111664 | 5.13E-15 | -2.63127 | 1 | 1 GNB3     | K07825 |
| ENSG00000111667 | 5.13E-15 | -2.63127 | 1 | 1 USP5     | K11836 |
| ENSG00000111671 | 5.13E-15 | -2.63127 | 1 | 1 SPSB2    | K10344 |
| ENSG00000111674 | 5.13E-15 | -2.63127 | 1 | 1 ENO2     | K01689 |
| ENSG00000111678 | 5.13E-15 | -2.63127 | 1 | 1 C12orf57 | -      |
| ENSG00000111701 | 5.13E-15 | -2.63127 | 1 | 1 APOBEC1  | K16932 |
| ENSG00000111704 | 5.13E-15 | -2.63127 | 1 | 1 NANOG    | K10164 |
| ENSG00000111713 | 5.13E-15 | -2.63127 | 1 | 1 GYS2     | K00693 |
| ENSG00000111783 | 5.13E-15 | -2.63127 | 1 | 1 RFX4     | K09174 |
| ENSG00000111796 | 5.13E-15 | -2.63127 | 1 | 1 KLRB1    | K06543 |
| ENSG00000111879 | 5.13E-15 | -2.63127 | 1 | 1 FAM184A  | -      |
| ENSG00000111886 | 5.13E-15 | -2.63127 | 1 | 1 GABRR2   | K05190 |
| ENSG00000112038 | 5.13E-15 | -2.63127 | 1 | 1 OPRM1    | K04215 |
| ENSG00000112077 | 5.13E-15 | -2.63127 | 1 | 1 RHAG     | K06580 |
| ENSG00000112115 | 5.13E-15 | -2.63127 | 1 | 1 IL17A    | K05489 |
| ENSG00000112116 | 5.13E-15 | -2.63127 | 1 | 1 IL17F    | K05494 |
| ENSG00000112164 | 5.13E-15 | -2.63127 | 1 | 1 GLP1R    | K04581 |

|                 |          |          |   |            |        |
|-----------------|----------|----------|---|------------|--------|
| ENSG00000112195 | 5.13E-15 | -2.63127 | 1 | 1 TREML2   | K14364 |
| ENSG00000112214 | 5.13E-15 | -2.63127 | 1 | 1 FHL5     | -      |
| ENSG00000112218 | 5.13E-15 | -2.63127 | 1 | 1 GPR63    | K04321 |
| ENSG00000112232 | 5.13E-15 | -2.63127 | 1 | 1 KHDRBS2  | K17843 |
| ENSG00000112238 | 5.13E-15 | -2.63127 | 1 | 1 PRDM13   | -      |
| ENSG00000112273 | 5.13E-15 | -2.63127 | 1 | 1 HDGFL1   | K16641 |
| ENSG00000112276 | 5.13E-15 | -2.63127 | 1 | 1 BVES     | -      |
| ENSG00000112280 | 5.13E-15 | -2.63127 | 1 | 1 COL9A1   | K08131 |
| ENSG00000112293 | 5.13E-15 | -2.63127 | 1 | 1 GPLD1    | K01127 |
| ENSG00000112320 | 5.13E-15 | -2.63127 | 1 | 1 SOBP     | -      |
| ENSG00000112333 | 5.13E-15 | -2.63127 | 1 | 1 NR2E1    | K08545 |
| ENSG00000112337 | 5.13E-15 | -2.63127 | 1 | 1 SLC17A2  | K12300 |
| ENSG00000112394 | 5.13E-15 | -2.63127 | 1 | 1 SLC16A10 | K08187 |
| ENSG00000112462 | 5.13E-15 | -2.63127 | 1 | 1 OR12D3   | K04257 |
| ENSG00000112473 | 5.13E-15 | -2.63127 | 1 | 1 SLC39A7  | K14713 |
| ENSG00000112486 | 5.13E-15 | -2.63127 | 1 | 1 CCR6     | K04181 |
| ENSG00000112494 | 5.13E-15 | -2.63127 | 1 | 1 UNC93A   | -      |
| ENSG00000112530 | 5.13E-15 | -2.63127 | 1 | 1 PACRG    | -      |
| ENSG00000112539 | 5.13E-15 | -2.63127 | 1 | 1 C6orf118 | -      |
| ENSG00000112562 | 5.13E-15 | -2.63127 | 1 | 1 SMOC2    | -      |
| ENSG00000112761 | 5.13E-15 | -2.63127 | 1 | 1 WISP3    | -      |
| ENSG00000112769 | 5.13E-15 | -2.63127 | 1 | 1 LAMA4    | K06241 |
| ENSG00000112782 | 5.13E-15 | -2.63127 | 1 | 1 CLIC5    | K05025 |
| ENSG00000112796 | 5.13E-15 | -2.63127 | 1 | 1 ENPP5    | K18398 |
| ENSG00000112799 | 5.13E-15 | -2.63127 | 1 | 1 LY86     | -      |
| ENSG00000112818 | 5.13E-15 | -2.63127 | 1 | 1 MEP1A    | K01395 |
| ENSG00000112837 | 5.13E-15 | -2.63127 | 1 | 1 TBX18    | K10183 |
| ENSG00000112852 | 5.13E-15 | -2.63127 | 1 | 1 PCDHB2   | K16494 |
| ENSG00000112936 | 5.13E-15 | -2.63127 | 1 | 1 C7       | K03996 |
| ENSG00000112964 | 5.13E-15 | -2.63127 | 1 | 1 GHR      | K05080 |
| ENSG00000112981 | 5.13E-15 | -2.63127 | 1 | 1 NME5     | K00940 |
| ENSG00000113088 | 5.13E-15 | -2.63127 | 1 | 1 GZMK     | K08663 |
| ENSG00000113196 | 5.13E-15 | -2.63127 | 1 | 1 HAND1    | K09071 |
| ENSG00000113205 | 5.13E-15 | -2.63127 | 1 | 1 PCDHB3   | K16494 |
| ENSG00000113209 | 5.13E-15 | -2.63127 | 1 | 1 PCDHB5   | K16494 |
| ENSG00000113211 | 5.13E-15 | -2.63127 | 1 | 1 PCDHB6   | K16494 |
| ENSG00000113212 | 5.13E-15 | -2.63127 | 1 | 1 PCDHB7   | K16494 |
| ENSG00000113248 | 5.13E-15 | -2.63127 | 1 | 1 PCDHB15  | K16494 |
| ENSG00000113249 | 5.13E-15 | -2.63127 | 1 | 1 HAVCR1   | -      |
| ENSG00000113262 | 5.13E-15 | -2.63127 | 1 | 1 GRM6     | K04608 |
| ENSG00000113296 | 5.13E-15 | -2.63127 | 1 | 1 THBS4    | K04659 |
| ENSG00000113302 | 5.13E-15 | -2.63127 | 1 | 1 IL12B    | K05425 |
| ENSG00000113303 | 5.13E-15 | -2.63127 | 1 | 1 BTNL8    | K06712 |
| ENSG00000113327 | 5.13E-15 | -2.63127 | 1 | 1 GABRG2   | K05186 |
| ENSG00000113361 | 5.13E-15 | -2.63127 | 1 | 1 CDH6     | K06798 |
| ENSG00000113396 | 5.13E-15 | -2.63127 | 1 | 1 SLC27A6  | K08749 |
| ENSG00000113430 | 5.13E-15 | -2.63127 | 1 | 1 IRX4     | -      |
| ENSG00000113492 | 5.13E-15 | -2.63127 | 1 | 1 AGXT2    | K00827 |
| ENSG00000113494 | 5.13E-15 | -2.63127 | 1 | 1 PRLR     | K05081 |
| ENSG00000113525 | 5.13E-15 | -2.63127 | 1 | 1 IL5      | K05428 |
| ENSG00000113532 | 5.13E-15 | -2.63127 | 1 | 1 ST8SIA4  | K06614 |
| ENSG00000113600 | 5.13E-15 | -2.63127 | 1 | 1 C9       | K04000 |
| ENSG00000113749 | 5.13E-15 | -2.63127 | 1 | 1 HRH2     | K04150 |
| ENSG00000113805 | 5.13E-15 | -2.63127 | 1 | 1 CNTN3    | K06761 |
| ENSG00000113905 | 5.13E-15 | -2.63127 | 1 | 1 HRG      | K09654 |
| ENSG00000113924 | 5.13E-15 | -2.63127 | 1 | 1 HGD      | K00451 |
| ENSG00000114113 | 5.13E-15 | -2.63127 | 1 | 1 RBP2     | K14622 |
| ENSG00000114115 | 5.13E-15 | -2.63127 | 1 | 1 RBP1     | K06210 |



|                 |          |          |   |                 |        |
|-----------------|----------|----------|---|-----------------|--------|
| ENSG00000114204 | 5.13E-15 | -2.63127 | 1 | 1 SERPINI2      | -      |
| ENSG00000114248 | 5.13E-15 | -2.63127 | 1 | 1 LRRC31        | -      |
| ENSG00000114279 | 5.13E-15 | -2.63127 | 1 | 1 FGF12         | -      |
| ENSG00000114349 | 5.13E-15 | -2.63127 | 1 | 1 GNAT1         | K04631 |
| ENSG00000114374 | 5.13E-15 | -2.63127 | 1 | 1 USP9Y         | K11840 |
| ENSG00000114405 | 5.13E-15 | -2.63127 | 1 | 1 C3orf14       | -      |
| ENSG00000114446 | 5.13E-15 | -2.63127 | 1 | 1 IFT57         | K04638 |
| ENSG00000114455 | 5.13E-15 | -2.63127 | 1 | 1 HHLA2         | -      |
| ENSG00000114487 | 5.13E-15 | -2.63127 | 1 | 1 MORC1         | -      |
| ENSG00000114654 | 5.13E-15 | -2.63127 | 1 | 1 EFCC1         | -      |
| ENSG00000114656 | 5.13E-15 | -2.63127 | 1 | 1 KIAA1257      | -      |
| ENSG00000114771 | 5.13E-15 | -2.63127 | 1 | 1 AADAC         | K13616 |
| ENSG00000114790 | 5.13E-15 | -2.63127 | 1 | 1 ARHGEF26      | K13744 |
| ENSG00000114805 | 5.13E-15 | -2.63127 | 1 | 1 PLCH1         | K19006 |
| ENSG00000115138 | 5.13E-15 | -2.63127 | 1 | 1 POMC          | K05228 |
| ENSG00000115165 | 5.13E-15 | -2.63127 | 1 | 1 CYTIP         | -      |
| ENSG00000115226 | 5.13E-15 | -2.63127 | 1 | 1 FNDC4         | -      |
| ENSG00000115232 | 5.13E-15 | -2.63127 | 1 | 1 ITGA4         | K06483 |
| ENSG00000115263 | 5.13E-15 | -2.63127 | 1 | 1 GCG           | K05259 |
| ENSG00000115290 | 5.13E-15 | -2.63127 | 1 | 1 GRB14         | -      |
| ENSG00000115339 | 5.13E-15 | -2.63127 | 1 | 1 GALNT3        | K00710 |
| ENSG00000115361 | 5.13E-15 | -2.63127 | 1 | 1 ACADL         | K00255 |
| ENSG00000115457 | 5.13E-15 | -2.63127 | 1 | 1 IGFBP2        | -      |
| ENSG00000115474 | 5.13E-15 | -2.63127 | 1 | 1 KCNJ13        | K05006 |
| ENSG00000115488 | 5.13E-15 | -2.63127 | 1 | 1 NEU2          | K12357 |
| ENSG00000115526 | 5.13E-15 | -2.63127 | 1 | 1 CHST10        | K09674 |
| ENSG00000115592 | 5.13E-15 | -2.63127 | 1 | 1 PRKAG3        | K07200 |
| ENSG00000115593 | 5.13E-15 | -2.63127 | 1 | 1 SMYD1         | K11426 |
| ENSG00000115598 | 5.13E-15 | -2.63127 | 1 | 1 IL1RL2        | K05172 |
| ENSG00000115604 | 5.13E-15 | -2.63127 | 1 | 1 IL18R1        | K05173 |
| ENSG00000115607 | 5.13E-15 | -2.63127 | 1 | 1 IL18RAP       | K05174 |
| ENSG00000115616 | 5.13E-15 | -2.63127 | 1 | 1 SLC9A2        | K14722 |
| ENSG00000115648 | 5.13E-15 | -2.63127 | 1 | 1 MLPH          | -      |
| ENSG00000115665 | 5.13E-15 | -2.63127 | 1 | 1 SLC5A7        | K14387 |
| ENSG00000115850 | 5.13E-15 | -2.63127 | 1 | 1 LCT           | K01229 |
| ENSG00000115896 | 5.13E-15 | -2.63127 | 1 | 1 PLCL1         | K15375 |
| ENSG00000115934 | 5.13E-15 | -2.63127 | 1 | 1 RP11-153K16.2 | -      |
| ENSG00000116014 | 5.13E-15 | -2.63127 | 1 | 1 KISS1R        | K08374 |
| ENSG00000116031 | 5.13E-15 | -2.63127 | 1 | 1 CD207         | K06561 |
| ENSG00000116035 | 5.13E-15 | -2.63127 | 1 | 1 VAX2          | K09318 |
| ENSG00000116039 | 5.13E-15 | -2.63127 | 1 | 1 ATP6V1B1      | K02147 |
| ENSG00000116106 | 5.13E-15 | -2.63127 | 1 | 1 EPHA4         | K05105 |
| ENSG00000116132 | 5.13E-15 | -2.63127 | 1 | 1 PRRX1         | K09329 |
| ENSG00000116147 | 5.13E-15 | -2.63127 | 1 | 1 TNFR          | K06252 |
| ENSG00000116183 | 5.13E-15 | -2.63127 | 1 | 1 PAPP2         | -      |
| ENSG00000116218 | 5.13E-15 | -2.63127 | 1 | 1 NPHS2         | K18268 |
| ENSG00000116329 | 5.13E-15 | -2.63127 | 1 | 1 OPRD1         | K04213 |
| ENSG00000116703 | 5.13E-15 | -2.63127 | 1 | 1 PDC           | K08327 |
| ENSG00000116721 | 5.13E-15 | -2.63127 | 1 | 1 PRAMEF1       | -      |
| ENSG00000116726 | 5.13E-15 | -2.63127 | 1 | 1 PRAMEF12      | -      |
| ENSG00000116745 | 5.13E-15 | -2.63127 | 1 | 1 RPE65         | K11158 |
| ENSG00000116748 | 5.13E-15 | -2.63127 | 1 | 1 AMPD1         | K01490 |
| ENSG00000116824 | 5.13E-15 | -2.63127 | 1 | 1 CD2           | K06449 |
| ENSG00000116882 | 5.13E-15 | -2.63127 | 1 | 1 HAO2          | K11517 |
| ENSG00000116962 | 5.13E-15 | -2.63127 | 1 | 1 NID1          | K06826 |
| ENSG00000116981 | 5.13E-15 | -2.63127 | 1 | 1 NT5C1A        | K01081 |
| ENSG00000116996 | 5.13E-15 | -2.63127 | 1 | 1 ZP4           | -      |
| ENSG00000117069 | 5.13E-15 | -2.63127 | 1 | 1 ST6GALNAC5    | K03375 |

|                 |          |          |   |                 |        |
|-----------------|----------|----------|---|-----------------|--------|
| ENSG00000117090 | 5.13E-15 | -2.63127 | 1 | 1 SLAMF1        | K06536 |
| ENSG00000117091 | 5.13E-15 | -2.63127 | 1 | 1 CD48          | K06479 |
| ENSG00000117115 | 5.13E-15 | -2.63127 | 1 | 1 PADI2         | K01481 |
| ENSG00000117122 | 5.13E-15 | -2.63127 | 1 | 1 MFAP2         | -      |
| ENSG00000117154 | 5.13E-15 | -2.63127 | 1 | 1 IGSF21        | -      |
| ENSG00000117281 | 5.13E-15 | -2.63127 | 1 | 1 CD160         | K06542 |
| ENSG00000117322 | 5.13E-15 | -2.63127 | 1 | 1 CR2           | K04012 |
| ENSG00000117400 | 5.13E-15 | -2.63127 | 1 | 1 MPL           | K05082 |
| ENSG00000117501 | 5.13E-15 | -2.63127 | 1 | 1 MROH9         | -      |
| ENSG00000117507 | 5.13E-15 | -2.63127 | 1 | 1 FMO6P         | K00485 |
| ENSG00000117519 | 5.13E-15 | -2.63127 | 1 | 1 CNN3          | -      |
| ENSG00000117560 | 5.13E-15 | -2.63127 | 1 | 1 FASLG         | K04389 |
| ENSG00000117594 | 5.13E-15 | -2.63127 | 1 | 1 HSD11B1       | K15680 |
| ENSG00000117595 | 5.13E-15 | -2.63127 | 1 | 1 IRF6          | K10154 |
| ENSG00000117598 | 5.13E-15 | -2.63127 | 1 | 1 LPPR5         | K19581 |
| ENSG00000117600 | 5.13E-15 | -2.63127 | 1 | 1 LPPR4         | K19582 |
| ENSG00000117601 | 5.13E-15 | -2.63127 | 1 | 1 SERPINC1      | K03911 |
| ENSG00000117707 | 5.13E-15 | -2.63127 | 1 | 1 PROX1         | -      |
| ENSG00000117834 | 5.13E-15 | -2.63127 | 1 | 1 SLC5A9        | K14389 |
| ENSG00000118094 | 5.13E-15 | -2.63127 | 1 | 1 TREH          | K01194 |
| ENSG00000118113 | 5.13E-15 | -2.63127 | 1 | 1 MMP8          | K01402 |
| ENSG00000118137 | 5.13E-15 | -2.63127 | 1 | 1 APOA1         | K08757 |
| ENSG00000118231 | 5.13E-15 | -2.63127 | 1 | 1 CRYGD         | -      |
| ENSG00000118245 | 5.13E-15 | -2.63127 | 1 | 1 TNP1          | -      |
| ENSG00000118271 | 5.13E-15 | -2.63127 | 1 | 1 TTR           | -      |
| ENSG00000118298 | 5.13E-15 | -2.63127 | 1 | 1 CA14          | K01672 |
| ENSG00000118308 | 5.13E-15 | -2.63127 | 1 | 1 LRMP          | -      |
| ENSG00000118322 | 5.13E-15 | -2.63127 | 1 | 1 ATP10B        | K01530 |
| ENSG00000118402 | 5.13E-15 | -2.63127 | 1 | 1 ELOVL4        | K10249 |
| ENSG00000118432 | 5.13E-15 | -2.63127 | 1 | 1 CNR1          | K04277 |
| ENSG00000118434 | 5.13E-15 | -2.63127 | 1 | 1 SPACA1        | -      |
| ENSG00000118491 | 5.13E-15 | -2.63127 | 1 | 1 ZC2HC1B       | K14798 |
| ENSG00000118492 | 5.13E-15 | -2.63127 | 1 | 1 ADGB          | -      |
| ENSG00000118507 | 5.13E-15 | -2.63127 | 1 | 1 AKAP7         | K16524 |
| ENSG00000118596 | 5.13E-15 | -2.63127 | 1 | 1 SLC16A7       | K08184 |
| ENSG00000118702 | 5.13E-15 | -2.63127 | 1 | 1 GHRH          | K05260 |
| ENSG00000118729 | 5.13E-15 | -2.63127 | 1 | 1 CASQ2         | -      |
| ENSG00000118733 | 5.13E-15 | -2.63127 | 1 | 1 OLFM3         | -      |
| ENSG00000118903 | 5.13E-15 | -2.63127 | 1 | 1 BTF3P11       | K01527 |
| ENSG00000118971 | 5.13E-15 | -2.63127 | 1 | 1 CCND2         | K10151 |
| ENSG00000118972 | 5.13E-15 | -2.63127 | 1 | 1 FGF23         | K04358 |
| ENSG00000118976 | 5.13E-15 | -2.63127 | 1 | 1 HIN1L         | K13718 |
| ENSG00000119121 | 5.13E-15 | -2.63127 | 1 | 1 TRPM6         | K04981 |
| ENSG00000119147 | 5.13E-15 | -2.63127 | 1 | 1 C2orf40       | -      |
| ENSG00000119440 | 5.13E-15 | -2.63127 | 1 | 1 LCN1P1        | -      |
| ENSG00000119457 | 5.13E-15 | -2.63127 | 1 | 1 SLC46A2       | K14614 |
| ENSG00000119535 | 5.13E-15 | -2.63127 | 1 | 1 CSF3R         | K05061 |
| ENSG00000119614 | 5.13E-15 | -2.63127 | 1 | 1 VSX2          | K09336 |
| ENSG00000119660 | 5.13E-15 | -2.63127 | 1 | 1 RP11-293M10.4 | -      |
| ENSG00000119698 | 5.13E-15 | -2.63127 | 1 | 1 PPP4R4        | K15426 |
| ENSG00000119714 | 5.13E-15 | -2.63127 | 1 | 1 GPR68         | -      |
| ENSG00000119715 | 5.13E-15 | -2.63127 | 1 | 1 ESRRB         | K08553 |
| ENSG00000119782 | 5.13E-15 | -2.63127 | 1 | 1 FKBP1B        | K09568 |
| ENSG00000119866 | 5.13E-15 | -2.63127 | 1 | 1 BCL11A        | -      |
| ENSG00000119888 | 5.13E-15 | -2.63127 | 1 | 1 EPCAM         | K06737 |
| ENSG00000119913 | 5.13E-15 | -2.63127 | 1 | 1 TECTB         | -      |
| ENSG00000119919 | 5.13E-15 | -2.63127 | 1 | 1 NKX2-3        | K09343 |
| ENSG00000119946 | 5.13E-15 | -2.63127 | 1 | 1 CNNM1         | K16302 |

|                 |          |          |   |                |        |
|-----------------|----------|----------|---|----------------|--------|
| ENSG00000119973 | 5.13E-15 | -2.63127 | 1 | 1 PRLHR        | K04314 |
| ENSG00000120054 | 5.13E-15 | -2.63127 | 1 | 1 CPN1         | K01292 |
| ENSG00000120057 | 5.13E-15 | -2.63127 | 1 | 1 SFRP5        | K02222 |
| ENSG00000120068 | 5.13E-15 | -2.63127 | 1 | 1 HOXB8        | K09308 |
| ENSG00000120094 | 5.13E-15 | -2.63127 | 1 | 1 HOXB1        | K09301 |
| ENSG00000120149 | 5.13E-15 | -2.63127 | 1 | 1 MSX2         | K09341 |
| ENSG00000120210 | 5.13E-15 | -2.63127 | 1 | 1 INSL6        | K05255 |
| ENSG00000120235 | 5.13E-15 | -2.63127 | 1 | 1 IFNA6        | K05414 |
| ENSG00000120251 | 5.13E-15 | -2.63127 | 1 | 1 GRIA2        | K05198 |
| ENSG00000120262 | 5.13E-15 | -2.63127 | 1 | 1 CCDC170      | K09228 |
| ENSG00000120279 | 5.13E-15 | -2.63127 | 1 | 1 MYCT1        | -      |
| ENSG00000120280 | 5.13E-15 | -2.63127 | 1 | 1 CXorf21      | K09654 |
| ENSG00000120289 | 5.13E-15 | -2.63127 | 1 | 1 MAGEB4       | -      |
| ENSG00000120322 | 5.13E-15 | -2.63127 | 1 | 1 PCDHB8       | K16494 |
| ENSG00000120324 | 5.13E-15 | -2.63127 | 1 | 1 PCDHB10      | K16494 |
| ENSG00000120327 | 5.13E-15 | -2.63127 | 1 | 1 PCDHB14      | K16494 |
| ENSG00000120329 | 5.13E-15 | -2.63127 | 1 | 1 SLC25A2      | K15101 |
| ENSG00000120341 | 5.13E-15 | -2.63127 | 1 | 1 SEC16B       | -      |
| ENSG00000120436 | 5.13E-15 | -2.63127 | 1 | 1 GPR31        | K08406 |
| ENSG00000120440 | 5.13E-15 | -2.63127 | 1 | 1 TTLL2        | K16600 |
| ENSG00000120457 | 5.13E-15 | -2.63127 | 1 | 1 KCNJ5        | K04999 |
| ENSG00000120471 | 5.13E-15 | -2.63127 | 1 | 1 TP53AIP1     | K13773 |
| ENSG00000120498 | 5.13E-15 | -2.63127 | 1 | 1 TEX11        | -      |
| ENSG00000120555 | 5.13E-15 | -2.63127 | 1 | 1 SEPT7P9      | K16944 |
| ENSG00000120563 | 5.13E-15 | -2.63127 | 1 | 1 LYZL1        | K01185 |
| ENSG00000120586 | 5.13E-15 | -2.63127 | 1 | 1 MRC1         | K06560 |
| ENSG00000120594 | 5.13E-15 | -2.63127 | 1 | 1 PLXDC2       | K04613 |
| ENSG00000120645 | 5.13E-15 | -2.63127 | 1 | 1 IQSEC3       | K12495 |
| ENSG00000120659 | 5.13E-15 | -2.63127 | 1 | 1 TNFSF11      | K05473 |
| ENSG00000120903 | 5.13E-15 | -2.63127 | 1 | 1 CHRNA2       | K04804 |
| ENSG00000120907 | 5.13E-15 | -2.63127 | 1 | 1 ADRA1A       | K04135 |
| ENSG00000120915 | 5.13E-15 | -2.63127 | 1 | 1 EPHX2        | K08726 |
| ENSG00000120952 | 5.13E-15 | -2.63127 | 1 | 1 PRAMEF2      | -      |
| ENSG00000121068 | 5.13E-15 | -2.63127 | 1 | 1 TBX2         | K10176 |
| ENSG00000121075 | 5.13E-15 | -2.63127 | 1 | 1 TBX4         | K10178 |
| ENSG00000121089 | 5.13E-15 | -2.63127 | 1 | 1 NACA3P       | K03626 |
| ENSG00000121207 | 5.13E-15 | -2.63127 | 1 | 1 LRAT         | -      |
| ENSG00000121297 | 5.13E-15 | -2.63127 | 1 | 1 TSHZ3        | K09236 |
| ENSG00000121314 | 5.13E-15 | -2.63127 | 1 | 1 TAS2R8       | K08474 |
| ENSG00000121316 | 5.13E-15 | -2.63127 | 1 | 1 PLBD1        | K12795 |
| ENSG00000121318 | 5.13E-15 | -2.63127 | 1 | 1 TAS2R10      | K08474 |
| ENSG00000121335 | 5.13E-15 | -2.63127 | 1 | 1 PRB2         | K13911 |
| ENSG00000121351 | 5.13E-15 | -2.63127 | 1 | 1 IAPP         | K08039 |
| ENSG00000121361 | 5.13E-15 | -2.63127 | 1 | 1 KCNJ8        | K05001 |
| ENSG00000121377 | 5.13E-15 | -2.63127 | 1 | 1 TAS2R7       | K08474 |
| ENSG00000121380 | 5.13E-15 | -2.63127 | 1 | 1 BCL2L14      | K17985 |
| ENSG00000121381 | 5.13E-15 | -2.63127 | 1 | 1 TAS2R9       | K08474 |
| ENSG00000121388 | 5.13E-15 | -2.63127 | 1 | 1 RP11-408E5.4 | K16307 |
| ENSG00000121410 | 5.13E-15 | -2.63127 | 1 | 1 A1BG         | -      |
| ENSG00000121413 | 5.13E-15 | -2.63127 | 1 | 1 ZSCAN18      | K09230 |
| ENSG00000121440 | 5.13E-15 | -2.63127 | 1 | 1 PDZRN3       | K15682 |
| ENSG00000121446 | 5.13E-15 | -2.63127 | 1 | 1 RGSL1        | -      |
| ENSG00000121552 | 5.13E-15 | -2.63127 | 1 | 1 CSTA         | K13907 |
| ENSG00000121570 | 5.13E-15 | -2.63127 | 1 | 1 DPPA4        | K17985 |
| ENSG00000121634 | 5.13E-15 | -2.63127 | 1 | 1 GJA8         | K07617 |
| ENSG00000121742 | 5.13E-15 | -2.63127 | 1 | 1 GJB6         | K07625 |
| ENSG00000121743 | 5.13E-15 | -2.63127 | 1 | 1 GJA3         | K07612 |
| ENSG00000121797 | 5.13E-15 | -2.63127 | 1 | 1 CCRL2        | K08373 |

|                 |          |          |   |             |        |
|-----------------|----------|----------|---|-------------|--------|
| ENSG00000121807 | 5.13E-15 | -2.63127 | 1 | 1 CCR2      | K04177 |
| ENSG00000121853 | 5.13E-15 | -2.63127 | 1 | 1 GHSR      | K04284 |
| ENSG00000121871 | 5.13E-15 | -2.63127 | 1 | 1 SLITRK3   | -      |
| ENSG00000121933 | 5.13E-15 | -2.63127 | 1 | 1 ADORA3    | K04268 |
| ENSG00000122012 | 5.13E-15 | -2.63127 | 1 | 1 SV2C      | K06258 |
| ENSG00000122025 | 5.13E-15 | -2.63127 | 1 | 1 FLT3      | K05092 |
| ENSG00000122043 | 5.13E-15 | -2.63127 | 1 | 1 LINC00544 | -      |
| ENSG00000122121 | 5.13E-15 | -2.63127 | 1 | 1 XPNPEP2   | K14208 |
| ENSG00000122122 | 5.13E-15 | -2.63127 | 1 | 1 SASH3     | -      |
| ENSG00000122133 | 5.13E-15 | -2.63127 | 1 | 1 PAEP      | -      |
| ENSG00000122136 | 5.13E-15 | -2.63127 | 1 | 1 OBP2A     | -      |
| ENSG00000122145 | 5.13E-15 | -2.63127 | 1 | 1 TBX22     | K10186 |
| ENSG00000122176 | 5.13E-15 | -2.63127 | 1 | 1 FMOD      | K08121 |
| ENSG00000122180 | 5.13E-15 | -2.63127 | 1 | 1 MYOG      | K18483 |
| ENSG00000122194 | 5.13E-15 | -2.63127 | 1 | 1 PLG       | K01315 |
| ENSG00000122223 | 5.13E-15 | -2.63127 | 1 | 1 CD244     | K06582 |
| ENSG00000122224 | 5.13E-15 | -2.63127 | 1 | 1 LY9       | K06570 |
| ENSG00000122254 | 5.13E-15 | -2.63127 | 1 | 1 HS3ST2    | K07808 |
| ENSG00000122304 | 5.13E-15 | -2.63127 | 1 | 1 PRM2      | -      |
| ENSG00000122375 | 5.13E-15 | -2.63127 | 1 | 1 OPN4      | K04255 |
| ENSG00000122543 | 5.13E-15 | -2.63127 | 1 | 1 OCM       | -      |
| ENSG00000122548 | 5.13E-15 | -2.63127 | 1 | 1 KIAA0087  | K02927 |
| ENSG00000122574 | 5.13E-15 | -2.63127 | 1 | 1 WIPF3     | K02927 |
| ENSG00000122584 | 5.13E-15 | -2.63127 | 1 | 1 NXPH1     | K16656 |
| ENSG00000122585 | 5.13E-15 | -2.63127 | 1 | 1 NPY       | K05232 |
| ENSG00000122592 | 5.13E-15 | -2.63127 | 1 | 1 HOXA7     | K09307 |
| ENSG00000122679 | 5.13E-15 | -2.63127 | 1 | 1 RAMP3     | K08449 |
| ENSG00000122691 | 5.13E-15 | -2.63127 | 1 | 1 TWIST1    | K09069 |
| ENSG00000122694 | 5.13E-15 | -2.63127 | 1 | 1 GLIPR2    | -      |
| ENSG00000122728 | 5.13E-15 | -2.63127 | 1 | 1 TAF1L     | K03125 |
| ENSG00000122756 | 5.13E-15 | -2.63127 | 1 | 1 CNTFR     | K05059 |
| ENSG00000122824 | 5.13E-15 | -2.63127 | 1 | 1 NUDT10    | K07766 |
| ENSG00000122852 | 5.13E-15 | -2.63127 | 1 | 1 SFTPA1    | K10067 |
| ENSG00000122859 | 5.13E-15 | -2.63127 | 1 | 1 NEUROG3   | K08028 |
| ENSG00000122872 | 5.13E-15 | -2.63127 | 1 | 1 ARL4P     | K07945 |
| ENSG00000123096 | 5.13E-15 | -2.63127 | 1 | 1 SSPN      | K03730 |
| ENSG00000123119 | 5.13E-15 | -2.63127 | 1 | 1 NECAB1    | -      |
| ENSG00000123165 | 5.13E-15 | -2.63127 | 1 | 1 ACTRT1    | -      |
| ENSG00000123171 | 5.13E-15 | -2.63127 | 1 | 1 CCDC70    | -      |
| ENSG00000123243 | 5.13E-15 | -2.63127 | 1 | 1 ITIH5     | -      |
| ENSG00000123307 | 5.13E-15 | -2.63127 | 1 | 1 NEUROD4   | K09079 |
| ENSG00000123338 | 5.13E-15 | -2.63127 | 1 | 1 NCKAP1L   | K05750 |
| ENSG00000123360 | 5.13E-15 | -2.63127 | 1 | 1 PDE1B     | K13755 |
| ENSG00000123407 | 5.13E-15 | -2.63127 | 1 | 1 HOXC12    | K09297 |
| ENSG00000123447 | 5.13E-15 | -2.63127 | 1 | 1 TYRL      | K00505 |
| ENSG00000123454 | 5.13E-15 | -2.63127 | 1 | 1 DBH       | K00503 |
| ENSG00000123496 | 5.13E-15 | -2.63127 | 1 | 1 IL13RA2   | K05077 |
| ENSG00000123560 | 5.13E-15 | -2.63127 | 1 | 1 PLP1      | K17271 |
| ENSG00000123561 | 5.13E-15 | -2.63127 | 1 | 1 SERPINA7  | K04525 |
| ENSG00000123569 | 5.13E-15 | -2.63127 | 1 | 1 H2BFWT    | K11252 |
| ENSG00000123570 | 5.13E-15 | -2.63127 | 1 | 1 RAB9B     | K07900 |
| ENSG00000123572 | 5.13E-15 | -2.63127 | 1 | 1 NRK       | K16313 |
| ENSG00000123576 | 5.13E-15 | -2.63127 | 1 | 1 ESX1      | K18491 |
| ENSG00000123584 | 5.13E-15 | -2.63127 | 1 | 1 MAGEA9B   | -      |
| ENSG00000123594 | 5.13E-15 | -2.63127 | 1 | 1 ATXN3L    | K11863 |
| ENSG00000123612 | 5.13E-15 | -2.63127 | 1 | 1 ACVR1C    | K13568 |
| ENSG00000123689 | 5.13E-15 | -2.63127 | 1 | 1 G0S2      | -      |
| ENSG00000123870 | 5.13E-15 | -2.63127 | 1 | 1 ZNF137P   | K09228 |

|                 |          |          |   |                  |        |
|-----------------|----------|----------|---|------------------|--------|
| ENSG00000124003 | 5.13E-15 | -2.63127 | 1 | 1 MOGAT1         | K14458 |
| ENSG00000124019 | 5.13E-15 | -2.63127 | 1 | 1 FAM124B        | -      |
| ENSG00000124089 | 5.13E-15 | -2.63127 | 1 | 1 MC3R           | K04201 |
| ENSG00000124097 | 5.13E-15 | -2.63127 | 1 | 1 HMGB1P1        | K10802 |
| ENSG00000124143 | 5.13E-15 | -2.63127 | 1 | 1 ARHGAP40       | -      |
| ENSG00000124157 | 5.13E-15 | -2.63127 | 1 | 1 SEMG2          | -      |
| ENSG00000124196 | 5.13E-15 | -2.63127 | 1 | 1 GTSF1L         | -      |
| ENSG00000124208 | 5.13E-15 | -2.63127 | 1 | 1 TMEM189-UBE2V1 | K10704 |
| ENSG00000124227 | 5.13E-15 | -2.63127 | 1 | 1 ANKRD60        | -      |
| ENSG00000124233 | 5.13E-15 | -2.63127 | 1 | 1 SEMG1          | -      |
| ENSG00000124237 | 5.13E-15 | -2.63127 | 1 | 1 C20orf85       | -      |
| ENSG00000124249 | 5.13E-15 | -2.63127 | 1 | 1 KCNK15         | K04923 |
| ENSG00000124253 | 5.13E-15 | -2.63127 | 1 | 1 PCK1           | K01596 |
| ENSG00000124256 | 5.13E-15 | -2.63127 | 1 | 1 ZBP1           | K12965 |
| ENSG00000124260 | 5.13E-15 | -2.63127 | 1 | 1 MAGEA10        | -      |
| ENSG00000124302 | 5.13E-15 | -2.63127 | 1 | 1 CHST8          | K09672 |
| ENSG00000124313 | 5.13E-15 | -2.63127 | 1 | 1 IQSEC2         | K12495 |
| ENSG00000124334 | 5.13E-15 | -2.63127 | 1 | 1 IL9R           | K05073 |
| ENSG00000124343 | 5.13E-15 | -2.63127 | 1 | 1 XG             | -      |
| ENSG00000124391 | 5.13E-15 | -2.63127 | 1 | 1 IL17C          | K05491 |
| ENSG00000124440 | 5.13E-15 | -2.63127 | 1 | 1 HIF3A          | K09096 |
| ENSG00000124469 | 5.13E-15 | -2.63127 | 1 | 1 CEACAM8        | K06499 |
| ENSG00000124479 | 5.13E-15 | -2.63127 | 1 | 1 NDP            | -      |
| ENSG00000124490 | 5.13E-15 | -2.63127 | 1 | 1 CRISP2         | -      |
| ENSG00000124507 | 5.13E-15 | -2.63127 | 1 | 1 PACSIN1        | -      |
| ENSG00000124564 | 5.13E-15 | -2.63127 | 1 | 1 SLC17A3        | K12300 |
| ENSG00000124568 | 5.13E-15 | -2.63127 | 1 | 1 SLC17A1        | K12300 |
| ENSG00000124575 | 5.13E-15 | -2.63127 | 1 | 1 HIST1H1D       | K11275 |
| ENSG00000124578 | 5.13E-15 | -2.63127 | 1 | 1 HIST1H4G       | K11254 |
| ENSG00000124610 | 5.13E-15 | -2.63127 | 1 | 1 HIST1H1A       | K11275 |
| ENSG00000124613 | 5.13E-15 | -2.63127 | 1 | 1 ZNF391         | -      |
| ENSG00000124615 | 5.13E-15 | -2.63127 | 1 | 1 MOCS1          | K03639 |
| ENSG00000124678 | 5.13E-15 | -2.63127 | 1 | 1 TCP11          | -      |
| ENSG00000124721 | 5.13E-15 | -2.63127 | 1 | 1 DNAH8          | K10408 |
| ENSG00000124780 | 5.13E-15 | -2.63127 | 1 | 1 KCNK17         | K04925 |
| ENSG00000124785 | 5.13E-15 | -2.63127 | 1 | 1 NRN1           | -      |
| ENSG00000124812 | 5.13E-15 | -2.63127 | 1 | 1 CRISP1         | -      |
| ENSG00000124818 | 5.13E-15 | -2.63127 | 1 | 1 OPN5           | K08385 |
| ENSG00000124827 | 5.13E-15 | -2.63127 | 1 | 1 GCM2           | -      |
| ENSG00000124875 | 5.13E-15 | -2.63127 | 1 | 1 CXCL6          | K05506 |
| ENSG00000124900 | 5.13E-15 | -2.63127 | 1 | 1 TRIM51         | K12019 |
| ENSG00000124915 | 5.13E-15 | -2.63127 | 1 | 1 RP11-467L20.10 | -      |
| ENSG00000124939 | 5.13E-15 | -2.63127 | 1 | 1 SCGB2A1        | -      |
| ENSG00000125046 | 5.13E-15 | -2.63127 | 1 | 1 SSUH2          | -      |
| ENSG00000125084 | 5.13E-15 | -2.63127 | 1 | 1 WNT1           | K03209 |
| ENSG00000125144 | 5.13E-15 | -2.63127 | 1 | 1 MT1G           | K14739 |
| ENSG00000125255 | 5.13E-15 | -2.63127 | 1 | 1 SLC10A2        | K14342 |
| ENSG00000125285 | 5.13E-15 | -2.63127 | 1 | 1 SOX21          | K09267 |
| ENSG00000125355 | 5.13E-15 | -2.63127 | 1 | 1 TMEM255A       | -      |
| ENSG00000125363 | 5.13E-15 | -2.63127 | 1 | 1 AMELX          | -      |
| ENSG00000125384 | 5.13E-15 | -2.63127 | 1 | 1 PTGER2         | K04259 |
| ENSG00000125385 | 5.13E-15 | -2.63127 | 1 | 1 RP11-297B17.2  | K02912 |
| ENSG00000125398 | 5.13E-15 | -2.63127 | 1 | 1 SOX9           | K18435 |
| ENSG00000125430 | 5.13E-15 | -2.63127 | 1 | 1 HS3ST3B1       | K07809 |
| ENSG00000125492 | 5.13E-15 | -2.63127 | 1 | 1 BARHL1         | K09360 |
| ENSG00000125498 | 5.13E-15 | -2.63127 | 1 | 1 KIR2DL1        | K07981 |
| ENSG00000125505 | 5.13E-15 | -2.63127 | 1 | 1 MBOAT7         | K13516 |
| ENSG00000125514 | 5.13E-15 | -2.63127 | 1 | 1 LINC00029      | -      |

|                 |          |          |   |                |        |
|-----------------|----------|----------|---|----------------|--------|
| ENSG00000125522 | 5.13E-15 | -2.63127 | 1 | 1 NPBWR2       | K08377 |
| ENSG00000125533 | 5.13E-15 | -2.63127 | 1 | 1 BHLHE23      | K09086 |
| ENSG00000125551 | 5.13E-15 | -2.63127 | 1 | 1 PLGLB2       | K01315 |
| ENSG00000125695 | 5.13E-15 | -2.63127 | 1 | 1 RP11-51F16.8 | K08271 |
| ENSG00000125780 | 5.13E-15 | -2.63127 | 1 | 1 TGM3         | K05620 |
| ENSG00000125788 | 5.13E-15 | -2.63127 | 1 | 1 DEFB126      | -      |
| ENSG00000125798 | 5.13E-15 | -2.63127 | 1 | 1 FOXA2        | K08035 |
| ENSG00000125804 | 5.13E-15 | -2.63127 | 1 | 1 FAM182A      | -      |
| ENSG00000125810 | 5.13E-15 | -2.63127 | 1 | 1 CD93         | K06702 |
| ENSG00000125813 | 5.13E-15 | -2.63127 | 1 | 1 PAX1         | K09382 |
| ENSG00000125815 | 5.13E-15 | -2.63127 | 1 | 1 CST8         | K13904 |
| ENSG00000125816 | 5.13E-15 | -2.63127 | 1 | 1 NKX2-4       | K09344 |
| ENSG00000125820 | 5.13E-15 | -2.63127 | 1 | 1 NKX2-2       | K08029 |
| ENSG00000125823 | 5.13E-15 | -2.63127 | 1 | 1 CSTL1        | -      |
| ENSG00000125831 | 5.13E-15 | -2.63127 | 1 | 1 CST11        | K13906 |
| ENSG00000125850 | 5.13E-15 | -2.63127 | 1 | 1 OVOL2        | K09216 |
| ENSG00000125851 | 5.13E-15 | -2.63127 | 1 | 1 PCSK2        | K01360 |
| ENSG00000125861 | 5.13E-15 | -2.63127 | 1 | 1 GFRA4        | -      |
| ENSG00000125869 | 5.13E-15 | -2.63127 | 1 | 1 LAMP5        | -      |
| ENSG00000125878 | 5.13E-15 | -2.63127 | 1 | 1 TCF15        | K09070 |
| ENSG00000125879 | 5.13E-15 | -2.63127 | 1 | 1 OTOR         | -      |
| ENSG00000125888 | 5.13E-15 | -2.63127 | 1 | 1 BANF2        | -      |
| ENSG00000125899 | 5.13E-15 | -2.63127 | 1 | 1 C20orf187    | -      |
| ENSG00000125900 | 5.13E-15 | -2.63127 | 1 | 1 SIRPD        | K16827 |
| ENSG00000125903 | 5.13E-15 | -2.63127 | 1 | 1 DEFB129      | -      |
| ENSG00000125954 | 5.13E-15 | -2.63127 | 1 | 1 CHURC1-FNTB  | K05954 |
| ENSG00000125962 | 5.13E-15 | -2.63127 | 1 | 1 ARMCX5       | K14284 |
| ENSG00000125975 | 5.13E-15 | -2.63127 | 1 | 1 C20orf173    | -      |
| ENSG00000125998 | 5.13E-15 | -2.63127 | 1 | 1 FAM83C       | -      |
| ENSG00000125999 | 5.13E-15 | -2.63127 | 1 | 1 BPIFB1       | K02927 |
| ENSG00000126016 | 5.13E-15 | -2.63127 | 1 | 1 AMOT         | K16819 |
| ENSG00000126233 | 5.13E-15 | -2.63127 | 1 | 1 SLURP1       | -      |
| ENSG00000126251 | 5.13E-15 | -2.63127 | 1 | 1 GPR42        | K04326 |
| ENSG00000126259 | 5.13E-15 | -2.63127 | 1 | 1 KIRREL2      | -      |
| ENSG00000126262 | 5.13E-15 | -2.63127 | 1 | 1 FFAR2        | K04328 |
| ENSG00000126266 | 5.13E-15 | -2.63127 | 1 | 1 FFAR1        | K04325 |
| ENSG00000126337 | 5.13E-15 | -2.63127 | 1 | 1 KRT36        | K07604 |
| ENSG00000126542 | 5.13E-15 | -2.63127 | 1 | 1 PTPN20CP     | K18039 |
| ENSG00000126545 | 5.13E-15 | -2.63127 | 1 | 1 CSN1S1       | K17281 |
| ENSG00000126549 | 5.13E-15 | -2.63127 | 1 | 1 STATH        | K13914 |
| ENSG00000126550 | 5.13E-15 | -2.63127 | 1 | 1 HTN1         | K13913 |
| ENSG00000126733 | 5.13E-15 | -2.63127 | 1 | 1 DACH2        | -      |
| ENSG00000126752 | 5.13E-15 | -2.63127 | 1 | 1 SSX1         | K15624 |
| ENSG00000126785 | 5.13E-15 | -2.63127 | 1 | 1 RHOJ         | K07864 |
| ENSG00000126856 | 5.13E-15 | -2.63127 | 1 | 1 PRDM7        | K09228 |
| ENSG00000126947 | 5.13E-15 | -2.63127 | 1 | 1 ARMCX1       | -      |
| ENSG00000126970 | 5.13E-15 | -2.63127 | 1 | 1 ZC4H2        | K05255 |
| ENSG00000127074 | 5.13E-15 | -2.63127 | 1 | 1 RGS13        | K16449 |
| ENSG00000127152 | 5.13E-15 | -2.63127 | 1 | 1 BCL11B       | K09229 |
| ENSG00000127252 | 5.13E-15 | -2.63127 | 1 | 1 HRASLS       | -      |
| ENSG00000127318 | 5.13E-15 | -2.63127 | 1 | 1 IL22         | K05445 |
| ENSG00000127377 | 5.13E-15 | -2.63127 | 1 | 1 CRYGN        | -      |
| ENSG00000127412 | 5.13E-15 | -2.63127 | 1 | 1 TRPV5        | K04974 |
| ENSG00000127472 | 5.13E-15 | -2.63127 | 1 | 1 PLA2G5       | K01047 |
| ENSG00000127515 | 5.13E-15 | -2.63127 | 1 | 1 OR7A10       | K04257 |
| ENSG00000127529 | 5.13E-15 | -2.63127 | 1 | 1 OR7C2        | K04257 |
| ENSG00000127530 | 5.13E-15 | -2.63127 | 1 | 1 OR7C1        | K04257 |
| ENSG00000127743 | 5.13E-15 | -2.63127 | 1 | 1 IL17B        | K05490 |

|                 |          |          |   |            |        |
|-----------------|----------|----------|---|------------|--------|
| ENSG00000127780 | 5.13E-15 | -2.63127 | 1 | 1 OR1E2    | K04257 |
| ENSG00000127831 | 5.13E-15 | -2.63127 | 1 | 1 VIL1     | K05761 |
| ENSG00000127863 | 5.13E-15 | -2.63127 | 1 | 1 TNFRSF19 | K05155 |
| ENSG00000127903 | 5.13E-15 | -2.63127 | 1 | 1 ZNF835   | K17985 |
| ENSG00000127928 | 5.13E-15 | -2.63127 | 1 | 1 GNGT1    | K04548 |
| ENSG00000127951 | 5.13E-15 | -2.63127 | 1 | 1 FGL2     | K12581 |
| ENSG00000128040 | 5.13E-15 | -2.63127 | 1 | 1 SPINK2   | -      |
| ENSG00000128045 | 5.13E-15 | -2.63127 | 1 | 1 RASL11B  | K07853 |
| ENSG00000128052 | 5.13E-15 | -2.63127 | 1 | 1 KDR      | K05098 |
| ENSG00000128253 | 5.13E-15 | -2.63127 | 1 | 1 RFPL2    | -      |
| ENSG00000128322 | 5.13E-15 | -2.63127 | 1 | 1 IGLL1    | K06554 |
| ENSG00000128383 | 5.13E-15 | -2.63127 | 1 | 1 APOBEC3A | -      |
| ENSG00000128408 | 5.13E-15 | -2.63127 | 1 | 1 RIBC2    | -      |
| ENSG00000128438 | 5.13E-15 | -2.63127 | 1 | 1 TBC1D27  | K12581 |
| ENSG00000128519 | 5.13E-15 | -2.63127 | 1 | 1 TAS2R16  | K08474 |
| ENSG00000128602 | 5.13E-15 | -2.63127 | 1 | 1 SMO      | K06226 |
| ENSG00000128610 | 5.13E-15 | -2.63127 | 1 | 1 FEZF1    | -      |
| ENSG00000128645 | 5.13E-15 | -2.63127 | 1 | 1 HOXD1    | K09301 |
| ENSG00000128655 | 5.13E-15 | -2.63127 | 1 | 1 PDE11A   | K13298 |
| ENSG00000128683 | 5.13E-15 | -2.63127 | 1 | 1 GAD1     | K01580 |
| ENSG00000128714 | 5.13E-15 | -2.63127 | 1 | 1 HOXD13   | K09298 |
| ENSG00000128739 | 5.13E-15 | -2.63127 | 1 | 1 SNRPN    | K11100 |
| ENSG00000128802 | 5.13E-15 | -2.63127 | 1 | 1 GDF2     | K05503 |
| ENSG00000128805 | 5.13E-15 | -2.63127 | 1 | 1 ARHGAP22 | -      |
| ENSG00000128815 | 5.13E-15 | -2.63127 | 1 | 1 WDFY4    | -      |
| ENSG00000129152 | 5.13E-15 | -2.63127 | 1 | 1 MYOD1    | K09064 |
| ENSG00000129159 | 5.13E-15 | -2.63127 | 1 | 1 KCNC1    | K04887 |
| ENSG00000129170 | 5.13E-15 | -2.63127 | 1 | 1 CSRP3    | K09377 |
| ENSG00000129221 | 5.13E-15 | -2.63127 | 1 | 1 AIPL1    | K17767 |
| ENSG00000129277 | 5.13E-15 | -2.63127 | 1 | 1 CCL4     | K12964 |
| ENSG00000129295 | 5.13E-15 | -2.63127 | 1 | 1 LRRC6    | K19753 |
| ENSG00000129437 | 5.13E-15 | -2.63127 | 1 | 1 KLK14    | K09622 |
| ENSG00000129450 | 5.13E-15 | -2.63127 | 1 | 1 SIGLEC9  | K06740 |
| ENSG00000129451 | 5.13E-15 | -2.63127 | 1 | 1 KLK10    | K09619 |
| ENSG00000129465 | 5.13E-15 | -2.63127 | 1 | 1 RIPK3    | K08847 |
| ENSG00000129467 | 5.13E-15 | -2.63127 | 1 | 1 ADCY4    | K08044 |
| ENSG00000129816 | 5.13E-15 | -2.63127 | 1 | 1 TTTY1B   | -      |
| ENSG00000129824 | 5.13E-15 | -2.63127 | 1 | 1 RPS4Y1   | K02987 |
| ENSG00000129845 | 5.13E-15 | -2.63127 | 1 | 1 TTTY1    | -      |
| ENSG00000129862 | 5.13E-15 | -2.63127 | 1 | 1 VCY1B    | -      |
| ENSG00000129864 | 5.13E-15 | -2.63127 | 1 | 1 VCY      | -      |
| ENSG00000129873 | 5.13E-15 | -2.63127 | 1 | 1 CDY2B    | K00653 |
| ENSG00000129946 | 5.13E-15 | -2.63127 | 1 | 1 SHC2     | K17447 |
| ENSG00000129965 | 5.13E-15 | -2.63127 | 1 | 1 INS-IGF2 | K04526 |
| ENSG00000130032 | 5.13E-15 | -2.63127 | 1 | 1 PRRG3    | K04949 |
| ENSG00000130035 | 5.13E-15 | -2.63127 | 1 | 1 GALNT8   | -      |
| ENSG00000130037 | 5.13E-15 | -2.63127 | 1 | 1 KCNA5    | K04878 |
| ENSG00000130038 | 5.13E-15 | -2.63127 | 1 | 1 EFCAB4B  | K17199 |
| ENSG00000130054 | 5.13E-15 | -2.63127 | 1 | 1 FAM155B  | -      |
| ENSG00000130167 | 5.13E-15 | -2.63127 | 1 | 1 TSPAN16  | K17357 |
| ENSG00000130176 | 5.13E-15 | -2.63127 | 1 | 1 CNN1     | -      |
| ENSG00000130182 | 5.13E-15 | -2.63127 | 1 | 1 ZSCAN10  | K09230 |
| ENSG00000130208 | 5.13E-15 | -2.63127 | 1 | 1 APOC1    | -      |
| ENSG00000130222 | 5.13E-15 | -2.63127 | 1 | 1 GADD45G  | K04402 |
| ENSG00000130224 | 5.13E-15 | -2.63127 | 1 | 1 LRCH2    | -      |
| ENSG00000130226 | 5.13E-15 | -2.63127 | 1 | 1 DPP6     | -      |
| ENSG00000130283 | 5.13E-15 | -2.63127 | 1 | 1 GDF1     | K05495 |
| ENSG00000130294 | 5.13E-15 | -2.63127 | 1 | 1 KIF1A    | K10392 |

|                 |          |          |   |            |        |
|-----------------|----------|----------|---|------------|--------|
| ENSG00000130349 | 5.13E-15 | -2.63127 | 1 | 1 C6orf203 | K15696 |
| ENSG00000130368 | 5.13E-15 | -2.63127 | 1 | 1 MAS1     | K04303 |
| ENSG00000130383 | 5.13E-15 | -2.63127 | 1 | 1 FUT5     | K07633 |
| ENSG00000130385 | 5.13E-15 | -2.63127 | 1 | 1 BMP15    | K05498 |
| ENSG00000130538 | 5.13E-15 | -2.63127 | 1 | 1 OR11H1   | K04257 |
| ENSG00000130540 | 5.13E-15 | -2.63127 | 1 | 1 SULT4A1  | K11823 |
| ENSG00000130561 | 5.13E-15 | -2.63127 | 1 | 1 SAG      | K19627 |
| ENSG00000130595 | 5.13E-15 | -2.63127 | 1 | 1 TNNT3    | K12046 |
| ENSG00000130598 | 5.13E-15 | -2.63127 | 1 | 1 TNNI2    | K12043 |
| ENSG00000130656 | 5.13E-15 | -2.63127 | 1 | 1 HBZ      | K13826 |
| ENSG00000130700 | 5.13E-15 | -2.63127 | 1 | 1 GATA5    | K17896 |
| ENSG00000130775 | 5.13E-15 | -2.63127 | 1 | 1 THEMIS2  | -      |
| ENSG00000130830 | 5.13E-15 | -2.63127 | 1 | 1 MPP1     | -      |
| ENSG00000130950 | 5.13E-15 | -2.63127 | 1 | 1 NUTM2F   | -      |
| ENSG00000130988 | 5.13E-15 | -2.63127 | 1 | 1 RGN      | K01053 |
| ENSG00000131002 | 5.13E-15 | -2.63127 | 1 | 1 TXLNG2P  | -      |
| ENSG00000131007 | 5.13E-15 | -2.63127 | 1 | 1 TTTY9B   | -      |
| ENSG00000131042 | 5.13E-15 | -2.63127 | 1 | 1 LILRB2   | K06512 |
| ENSG00000131050 | 5.13E-15 | -2.63127 | 1 | 1 BPIFA2   | -      |
| ENSG00000131055 | 5.13E-15 | -2.63127 | 1 | 1 COX4I2   | K02263 |
| ENSG00000131059 | 5.13E-15 | -2.63127 | 1 | 1 BPIFA3   | -      |
| ENSG00000131068 | 5.13E-15 | -2.63127 | 1 | 1 DEFB118  | -      |
| ENSG00000131089 | 5.13E-15 | -2.63127 | 1 | 1 ARHGEF9  | K05769 |
| ENSG00000131126 | 5.13E-15 | -2.63127 | 1 | 1 TEX101   | -      |
| ENSG00000131127 | 5.13E-15 | -2.63127 | 1 | 1 ZNF141   | K09228 |
| ENSG00000131142 | 5.13E-15 | -2.63127 | 1 | 1 CCL25    | K13072 |
| ENSG00000131183 | 5.13E-15 | -2.63127 | 1 | 1 SLC34A1  | K14683 |
| ENSG00000131233 | 5.13E-15 | -2.63127 | 1 | 1 GJA9     | K07618 |
| ENSG00000131264 | 5.13E-15 | -2.63127 | 1 | 1 CDX4     | K09312 |
| ENSG00000131398 | 5.13E-15 | -2.63127 | 1 | 1 KCNC3    | K04889 |
| ENSG00000131400 | 5.13E-15 | -2.63127 | 1 | 1 NAPSA    | K08565 |
| ENSG00000131401 | 5.13E-15 | -2.63127 | 1 | 1 NAPSB    | K08565 |
| ENSG00000131477 | 5.13E-15 | -2.63127 | 1 | 1 RAMP2    | K08448 |
| ENSG00000131482 | 5.13E-15 | -2.63127 | 1 | 1 G6PC     | K01084 |
| ENSG00000131538 | 5.13E-15 | -2.63127 | 1 | 1 TTTY6    | -      |
| ENSG00000131548 | 5.13E-15 | -2.63127 | 1 | 1 TTTY6B   | -      |
| ENSG00000131686 | 5.13E-15 | -2.63127 | 1 | 1 CA6      | K01672 |
| ENSG00000131721 | 5.13E-15 | -2.63127 | 1 | 1 RHOXF2   | -      |
| ENSG00000131738 | 5.13E-15 | -2.63127 | 1 | 1 KRT33B   | K07604 |
| ENSG00000131808 | 5.13E-15 | -2.63127 | 1 | 1 FSHB     | K05250 |
| ENSG00000131831 | 5.13E-15 | -2.63127 | 1 | 1 RAI2     | -      |
| ENSG00000131864 | 5.13E-15 | -2.63127 | 1 | 1 USP29    | K11850 |
| ENSG00000131910 | 5.13E-15 | -2.63127 | 1 | 1 NR0B2    | K08563 |
| ENSG00000131914 | 5.13E-15 | -2.63127 | 1 | 1 LIN28A   | K18754 |
| ENSG00000131951 | 5.13E-15 | -2.63127 | 1 | 1 LRRC9    | -      |
| ENSG00000131982 | 5.13E-15 | -2.63127 | 1 | 1 UBE2L2   | K04552 |
| ENSG00000132122 | 5.13E-15 | -2.63127 | 1 | 1 SPATA6   | K17532 |
| ENSG00000132139 | 5.13E-15 | -2.63127 | 1 | 1 GAS2L2   | -      |
| ENSG00000132185 | 5.13E-15 | -2.63127 | 1 | 1 FCRLA    | -      |
| ENSG00000132205 | 5.13E-15 | -2.63127 | 1 | 1 EMILIN2  | -      |
| ENSG00000132259 | 5.13E-15 | -2.63127 | 1 | 1 CNGA4    | K04951 |
| ENSG00000132297 | 5.13E-15 | -2.63127 | 1 | 1 HHLA1    | -      |
| ENSG00000132321 | 5.13E-15 | -2.63127 | 1 | 1 IQCA1    | -      |
| ENSG00000132329 | 5.13E-15 | -2.63127 | 1 | 1 RAMP1    | K08447 |
| ENSG00000132429 | 5.13E-15 | -2.63127 | 1 | 1 POPDC3   | -      |
| ENSG00000132446 | 5.13E-15 | -2.63127 | 1 | 1 FTHL17   | K00522 |
| ENSG00000132464 | 5.13E-15 | -2.63127 | 1 | 1 ENAM     | K12795 |
| ENSG00000132465 | 5.13E-15 | -2.63127 | 1 | 1 IGJ      | -      |



|                 |          |          |   |             |        |
|-----------------|----------|----------|---|-------------|--------|
| ENSG00000132498 | 5.13E-15 | -2.63127 | 1 | 1 ANKRD20A3 | K17299 |
| ENSG00000132514 | 5.13E-15 | -2.63127 | 1 | 1 CLEC10A   | K06721 |
| ENSG00000132517 | 5.13E-15 | -2.63127 | 1 | 1 SLC52A1   | K11447 |
| ENSG00000132518 | 5.13E-15 | -2.63127 | 1 | 1 GUCY2D    | K12321 |
| ENSG00000132554 | 5.13E-15 | -2.63127 | 1 | 1 RGS22     | K16449 |
| ENSG00000132563 | 5.13E-15 | -2.63127 | 1 | 1 REEP2     | K17338 |
| ENSG00000132631 | 5.13E-15 | -2.63127 | 1 | 1 SCP2D1    | —      |
| ENSG00000132671 | 5.13E-15 | -2.63127 | 1 | 1 SSTR4     | K04220 |
| ENSG00000132677 | 5.13E-15 | -2.63127 | 1 | 1 RHBG      | K06580 |
| ENSG00000132681 | 5.13E-15 | -2.63127 | 1 | 1 ATP1A4    | K01539 |
| ENSG00000132698 | 5.13E-15 | -2.63127 | 1 | 1 RAB25     | K07906 |
| ENSG00000132703 | 5.13E-15 | -2.63127 | 1 | 1 APCS      | —      |
| ENSG00000132704 | 5.13E-15 | -2.63127 | 1 | 1 FCRL2     | K06727 |
| ENSG00000132718 | 5.13E-15 | -2.63127 | 1 | 1 SYT11     | K17985 |
| ENSG00000132744 | 5.13E-15 | -2.63127 | 1 | 1 ACY3      | K18458 |
| ENSG00000132746 | 5.13E-15 | -2.63127 | 1 | 1 ALDH3B2   | K00129 |
| ENSG00000132821 | 5.13E-15 | -2.63127 | 1 | 1 VSTM2L    | —      |
| ENSG00000132840 | 5.13E-15 | -2.63127 | 1 | 1 BHMT2     | —      |
| ENSG00000132854 | 5.13E-15 | -2.63127 | 1 | 1 KANK4     | —      |
| ENSG00000132872 | 5.13E-15 | -2.63127 | 1 | 1 SYT4      | —      |
| ENSG00000132932 | 5.13E-15 | -2.63127 | 1 | 1 ATP8A2    | K14802 |
| ENSG00000132958 | 5.13E-15 | -2.63127 | 1 | 1 TPTE2     | K18079 |
| ENSG00000132970 | 5.13E-15 | -2.63127 | 1 | 1 WASF3     | K06083 |
| ENSG00000132972 | 5.13E-15 | -2.63127 | 1 | 1 RNF17     | K18405 |
| ENSG00000132975 | 5.13E-15 | -2.63127 | 1 | 1 GPR12     | K04315 |
| ENSG00000133019 | 5.13E-15 | -2.63127 | 1 | 1 CHRM3     | K04131 |
| ENSG00000133048 | 5.13E-15 | -2.63127 | 1 | 1 CHI3L1    | K17523 |
| ENSG00000133055 | 5.13E-15 | -2.63127 | 1 | 1 MYBPH     | K12558 |
| ENSG00000133083 | 5.13E-15 | -2.63127 | 1 | 1 DCLK1     | K08805 |
| ENSG00000133105 | 5.13E-15 | -2.63127 | 1 | 1 RXFP2     | K04307 |
| ENSG00000133107 | 5.13E-15 | -2.63127 | 1 | 1 TRPC4     | K04967 |
| ENSG00000133115 | 5.13E-15 | -2.63127 | 1 | 1 STOML3    | K17286 |
| ENSG00000133116 | 5.13E-15 | -2.63127 | 1 | 1 KL        | K14756 |
| ENSG00000133124 | 5.13E-15 | -2.63127 | 1 | 1 IRS4      | K17446 |
| ENSG00000133134 | 5.13E-15 | -2.63127 | 1 | 1 BEX2      | —      |
| ENSG00000133135 | 5.13E-15 | -2.63127 | 1 | 1 RNF128    | K10629 |
| ENSG00000133136 | 5.13E-15 | -2.63127 | 1 | 1 GNG5P2    | K04542 |
| ENSG00000133149 | 5.13E-15 | -2.63127 | 1 | 1 TEX13A    | —      |
| ENSG00000133169 | 5.13E-15 | -2.63127 | 1 | 1 BEX1      | K12465 |
| ENSG00000133317 | 5.13E-15 | -2.63127 | 1 | 1 LGALS12   | K10095 |
| ENSG00000133424 | 5.13E-15 | -2.63127 | 1 | 1 LARGE     | K09668 |
| ENSG00000133454 | 5.13E-15 | -2.63127 | 1 | 1 MYO18B    | K10362 |
| ENSG00000133475 | 5.13E-15 | -2.63127 | 1 | 1 GGT2      | K18592 |
| ENSG00000133519 | 5.13E-15 | -2.63127 | 1 | 1 ZDHHC8P1  | K18932 |
| ENSG00000133561 | 5.13E-15 | -2.63127 | 1 | 1 GIMAP6    | —      |
| ENSG00000133574 | 5.13E-15 | -2.63127 | 1 | 1 GIMAP4    | —      |
| ENSG00000133661 | 5.13E-15 | -2.63127 | 1 | 1 SFTPD     | K10068 |
| ENSG00000133742 | 5.13E-15 | -2.63127 | 1 | 1 CA1       | K01672 |
| ENSG00000133800 | 5.13E-15 | -2.63127 | 1 | 1 LYVE1     | K19012 |
| ENSG00000133878 | 5.13E-15 | -2.63127 | 1 | 1 DUSP26    | K14165 |
| ENSG00000133937 | 5.13E-15 | -2.63127 | 1 | 1 GSC       | K09324 |
| ENSG00000133958 | 5.13E-15 | -2.63127 | 1 | 1 UNC79     | —      |
| ENSG00000133980 | 5.13E-15 | -2.63127 | 1 | 1 VRTN      | —      |
| ENSG00000134020 | 5.13E-15 | -2.63127 | 1 | 1 PEBP4     | —      |
| ENSG00000134028 | 5.13E-15 | -2.63127 | 1 | 1 ADAMDEC1  | —      |
| ENSG00000134115 | 5.13E-15 | -2.63127 | 1 | 1 CNTN6     | —      |
| ENSG00000134121 | 5.13E-15 | -2.63127 | 1 | 1 CHL1      | K06758 |
| ENSG00000134184 | 5.13E-15 | -2.63127 | 1 | 1 GSTM1     | K00799 |

|                 |          |          |   |            |        |
|-----------------|----------|----------|---|------------|--------|
| ENSG00000134193 | 5.13E-15 | -2.63127 | 1 | 1 REG4     | -      |
| ENSG00000134200 | 5.13E-15 | -2.63127 | 1 | 1 TSHB     | K05251 |
| ENSG00000134201 | 5.13E-15 | -2.63127 | 1 | 1 GSTM5    | K00799 |
| ENSG00000134207 | 5.13E-15 | -2.63127 | 1 | 1 SYT6     | -      |
| ENSG00000134216 | 5.13E-15 | -2.63127 | 1 | 1 CHIA     | K01183 |
| ENSG00000134240 | 5.13E-15 | -2.63127 | 1 | 1 HMGCS2   | K01641 |
| ENSG00000134242 | 5.13E-15 | -2.63127 | 1 | 1 PTPN22   | K18024 |
| ENSG00000134249 | 5.13E-15 | -2.63127 | 1 | 1 ADAM30   | K08615 |
| ENSG00000134259 | 5.13E-15 | -2.63127 | 1 | 1 NGF      | K02582 |
| ENSG00000134323 | 5.13E-15 | -2.63127 | 1 | 1 MYCN     | K09109 |
| ENSG00000134343 | 5.13E-15 | -2.63127 | 1 | 1 ANO3     | K19498 |
| ENSG00000134389 | 5.13E-15 | -2.63127 | 1 | 1 CFHR5    | K04004 |
| ENSG00000134438 | 5.13E-15 | -2.63127 | 1 | 1 RAX      | K09332 |
| ENSG00000134443 | 5.13E-15 | -2.63127 | 1 | 1 GRP      | K05224 |
| ENSG00000134460 | 5.13E-15 | -2.63127 | 1 | 1 IL2RA    | K05068 |
| ENSG00000134489 | 5.13E-15 | -2.63127 | 1 | 1 HRH4     | K04152 |
| ENSG00000134532 | 5.13E-15 | -2.63127 | 1 | 1 SOX5     | K09269 |
| ENSG00000134538 | 5.13E-15 | -2.63127 | 1 | 1 SLCO1B1  | K05043 |
| ENSG00000134539 | 5.13E-15 | -2.63127 | 1 | 1 KLRD1    | K06516 |
| ENSG00000134545 | 5.13E-15 | -2.63127 | 1 | 1 KLRC1    | K06541 |
| ENSG00000134551 | 5.13E-15 | -2.63127 | 1 | 1 PRH2     | K13910 |
| ENSG00000134571 | 5.13E-15 | -2.63127 | 1 | 1 MYBPC3   | K12568 |
| ENSG00000134588 | 5.13E-15 | -2.63127 | 1 | 1 USP26    | -      |
| ENSG00000134595 | 5.13E-15 | -2.63127 | 1 | 1 SOX3     | K09267 |
| ENSG00000134612 | 5.13E-15 | -2.63127 | 1 | 1 FOLH1B   | K14592 |
| ENSG00000134627 | 5.13E-15 | -2.63127 | 1 | 1 PIWIL4   | K02156 |
| ENSG00000134640 | 5.13E-15 | -2.63127 | 1 | 1 MTNR1B   | K04286 |
| ENSG00000134716 | 5.13E-15 | -2.63127 | 1 | 1 CYP2J2   | K07418 |
| ENSG00000134760 | 5.13E-15 | -2.63127 | 1 | 1 DSG1     | K07596 |
| ENSG00000134762 | 5.13E-15 | -2.63127 | 1 | 1 DSC3     | K07602 |
| ENSG00000134765 | 5.13E-15 | -2.63127 | 1 | 1 DSC1     | K07600 |
| ENSG00000134812 | 5.13E-15 | -2.63127 | 1 | 1 GIF      | K14615 |
| ENSG00000134853 | 5.13E-15 | -2.63127 | 1 | 1 PDGFRA   | K04363 |
| ENSG00000134873 | 5.13E-15 | -2.63127 | 1 | 1 CLDN10   | K06087 |
| ENSG00000134917 | 5.13E-15 | -2.63127 | 1 | 1 ADAMTS8  | K08623 |
| ENSG00000135074 | 5.13E-15 | -2.63127 | 1 | 1 ADAM19   | K08608 |
| ENSG00000135097 | 5.13E-15 | -2.63127 | 1 | 1 MSI1     | K14411 |
| ENSG00000135144 | 5.13E-15 | -2.63127 | 1 | 1 DTX1     | K06058 |
| ENSG00000135220 | 5.13E-15 | -2.63127 | 1 | 1 UGT2A3   | K00699 |
| ENSG00000135222 | 5.13E-15 | -2.63127 | 1 | 1 CSN2     | K17107 |
| ENSG00000135298 | 5.13E-15 | -2.63127 | 1 | 1 BAI3     | K04598 |
| ENSG00000135312 | 5.13E-15 | -2.63127 | 1 | 1 HTR1B    | K04153 |
| ENSG00000135314 | 5.13E-15 | -2.63127 | 1 | 1 KHDC1    | K12581 |
| ENSG00000135324 | 5.13E-15 | -2.63127 | 1 | 1 MRAP2    | -      |
| ENSG00000135333 | 5.13E-15 | -2.63127 | 1 | 1 EPHA7    | K05108 |
| ENSG00000135355 | 5.13E-15 | -2.63127 | 1 | 1 GJA10    | K07631 |
| ENSG00000135374 | 5.13E-15 | -2.63127 | 1 | 1 ELF5     | K17101 |
| ENSG00000135413 | 5.13E-15 | -2.63127 | 1 | 1 LACRT    | -      |
| ENSG00000135426 | 5.13E-15 | -2.63127 | 1 | 1 TESPA1   | -      |
| ENSG00000135447 | 5.13E-15 | -2.63127 | 1 | 1 PPP1R1A  | K08050 |
| ENSG00000135502 | 5.13E-15 | -2.63127 | 1 | 1 SLC26A10 | K14707 |
| ENSG00000135569 | 5.13E-15 | -2.63127 | 1 | 1 TAAR5    | K05051 |
| ENSG00000135577 | 5.13E-15 | -2.63127 | 1 | 1 NMBR     | K04168 |
| ENSG00000135638 | 5.13E-15 | -2.63127 | 1 | 1 EMX1     | K09317 |
| ENSG00000135697 | 5.13E-15 | -2.63127 | 1 | 1 BCMO1    | K00515 |
| ENSG00000135773 | 5.13E-15 | -2.63127 | 1 | 1 CAPN9    | K08578 |
| ENSG00000135824 | 5.13E-15 | -2.63127 | 1 | 1 RGS8     | K16449 |
| ENSG00000135898 | 5.13E-15 | -2.63127 | 1 | 1 GPR55    | K08413 |

|                 |          |          |   |                |        |
|-----------------|----------|----------|---|----------------|--------|
| ENSG00000135903 | 5.13E-15 | -2.63127 | 1 | 1 PAX3         | K09381 |
| ENSG00000135917 | 5.13E-15 | -2.63127 | 1 | 1 SLC19A3      | K14610 |
| ENSG00000135973 | 5.13E-15 | -2.63127 | 1 | 1 GPR45        | K08409 |
| ENSG00000136099 | 5.13E-15 | -2.63127 | 1 | 1 PCDH8        | K16499 |
| ENSG00000136110 | 5.13E-15 | -2.63127 | 1 | 1 LECT1        | -      |
| ENSG00000136155 | 5.13E-15 | -2.63127 | 1 | 1 SCEL         | -      |
| ENSG00000136167 | 5.13E-15 | -2.63127 | 1 | 1 LCP1         | K17276 |
| ENSG00000136237 | 5.13E-15 | -2.63127 | 1 | 1 RAPGEF5      | K08019 |
| ENSG00000136250 | 5.13E-15 | -2.63127 | 1 | 1 AOA3         | K01065 |
| ENSG00000136297 | 5.13E-15 | -2.63127 | 1 | 1 MMD2         | K11064 |
| ENSG00000136305 | 5.13E-15 | -2.63127 | 1 | 1 CIDEB        | K04297 |
| ENSG00000136315 | 5.13E-15 | -2.63127 | 1 | 1 RP11-84C10.2 | -      |
| ENSG00000136404 | 5.13E-15 | -2.63127 | 1 | 1 TM6SF1       | -      |
| ENSG00000136449 | 5.13E-15 | -2.63127 | 1 | 1 MYCBPAP      | K17985 |
| ENSG00000136487 | 5.13E-15 | -2.63127 | 1 | 1 GH2          | K05438 |
| ENSG00000136488 | 5.13E-15 | -2.63127 | 1 | 1 CSH1         | K05438 |
| ENSG00000136531 | 5.13E-15 | -2.63127 | 1 | 1 SCN2A        | K04834 |
| ENSG00000136535 | 5.13E-15 | -2.63127 | 1 | 1 TBR1         | K10174 |
| ENSG00000136542 | 5.13E-15 | -2.63127 | 1 | 1 GALNT5       | -      |
| ENSG00000136546 | 5.13E-15 | -2.63127 | 1 | 1 SCN7A        | K04839 |
| ENSG00000136573 | 5.13E-15 | -2.63127 | 1 | 1 BLK          | -      |
| ENSG00000136634 | 5.13E-15 | -2.63127 | 1 | 1 IL10         | K05443 |
| ENSG00000136688 | 5.13E-15 | -2.63127 | 1 | 1 IL36G        | K05487 |
| ENSG00000136694 | 5.13E-15 | -2.63127 | 1 | 1 IL36A        | K05484 |
| ENSG00000136695 | 5.13E-15 | -2.63127 | 1 | 1 IL36RN       | K05483 |
| ENSG00000136696 | 5.13E-15 | -2.63127 | 1 | 1 IL36B        | K05486 |
| ENSG00000136697 | 5.13E-15 | -2.63127 | 1 | 1 IL1F10       | K05488 |
| ENSG00000136698 | 5.13E-15 | -2.63127 | 1 | 1 CFC1         | -      |
| ENSG00000136732 | 5.13E-15 | -2.63127 | 1 | 1 GYPC         | K06576 |
| ENSG00000136750 | 5.13E-15 | -2.63127 | 1 | 1 GAD2         | K01580 |
| ENSG00000136834 | 5.13E-15 | -2.63127 | 1 | 1 OR1J1        | K04257 |
| ENSG00000136839 | 5.13E-15 | -2.63127 | 1 | 1 OR13C9       | K04257 |
| ENSG00000136866 | 5.13E-15 | -2.63127 | 1 | 1 ZFP37        | K09228 |
| ENSG00000136928 | 5.13E-15 | -2.63127 | 1 | 1 GABBR2       | K04615 |
| ENSG00000136929 | 5.13E-15 | -2.63127 | 1 | 1 HEMGN        | -      |
| ENSG00000136939 | 5.13E-15 | -2.63127 | 1 | 1 OR1L4        | K04257 |
| ENSG00000136944 | 5.13E-15 | -2.63127 | 1 | 1 LMX1B        | K09371 |
| ENSG00000136960 | 5.13E-15 | -2.63127 | 1 | 1 ENPP2        | K01122 |
| ENSG00000137080 | 5.13E-15 | -2.63127 | 1 | 1 IFNA21       | K05414 |
| ENSG00000137090 | 5.13E-15 | -2.63127 | 1 | 1 DMRT1        | K19488 |
| ENSG00000137142 | 5.13E-15 | -2.63127 | 1 | 1 IGFBPL1      | -      |
| ENSG00000137198 | 5.13E-15 | -2.63127 | 1 | 1 GMPR         | K00364 |
| ENSG00000137204 | 5.13E-15 | -2.63127 | 1 | 1 SLC22A7      | K08204 |
| ENSG00000137251 | 5.13E-15 | -2.63127 | 1 | 1 TINAG        | -      |
| ENSG00000137252 | 5.13E-15 | -2.63127 | 1 | 1 HCRTR2       | K04239 |
| ENSG00000137265 | 5.13E-15 | -2.63127 | 1 | 1 IRF4         | K09445 |
| ENSG00000137285 | 5.13E-15 | -2.63127 | 1 | 1 TUBB2B       | K07375 |
| ENSG00000137312 | 5.13E-15 | -2.63127 | 1 | 1 FLOT1        | K07192 |
| ENSG00000137337 | 5.13E-15 | -2.63127 | 1 | 1 MDC1         | -      |
| ENSG00000137343 | 5.13E-15 | -2.63127 | 1 | 1 ATAT1        | K19573 |
| ENSG00000137392 | 5.13E-15 | -2.63127 | 1 | 1 CLPS         | K14460 |
| ENSG00000137404 | 5.13E-15 | -2.63127 | 1 | 1 NRM          | -      |
| ENSG00000137441 | 5.13E-15 | -2.63127 | 1 | 1 FGF2         | -      |
| ENSG00000137462 | 5.13E-15 | -2.63127 | 1 | 1 TLR2         | K10159 |
| ENSG00000137473 | 5.13E-15 | -2.63127 | 1 | 1 TTC29        | -      |
| ENSG00000137491 | 5.13E-15 | -2.63127 | 1 | 1 SLC02B1      | K14352 |
| ENSG00000137558 | 5.13E-15 | -2.63127 | 1 | 1 PI15         | -      |
| ENSG00000137571 | 5.13E-15 | -2.63127 | 1 | 1 SLC05A1      | K14356 |

|                 |          |          |   |                 |        |
|-----------------|----------|----------|---|-----------------|--------|
| ENSG00000137634 | 5.13E-15 | -2.63127 | 1 | 1 NXPE4         | -      |
| ENSG00000137648 | 5.13E-15 | -2.63127 | 1 | 1 TMPRSS4       | K09635 |
| ENSG00000137672 | 5.13E-15 | -2.63127 | 1 | 1 TRPC6         | K04969 |
| ENSG00000137674 | 5.13E-15 | -2.63127 | 1 | 1 MMP20         | K07999 |
| ENSG00000137675 | 5.13E-15 | -2.63127 | 1 | 1 MMP27         | K08005 |
| ENSG00000137700 | 5.13E-15 | -2.63127 | 1 | 1 SLC37A4       | K08171 |
| ENSG00000137707 | 5.13E-15 | -2.63127 | 1 | 1 BTG4          | K14443 |
| ENSG00000137720 | 5.13E-15 | -2.63127 | 1 | 1 C11orf1       | K17985 |
| ENSG00000137726 | 5.13E-15 | -2.63127 | 1 | 1 FXYD6         | K13363 |
| ENSG00000137727 | 5.13E-15 | -2.63127 | 1 | 1 ARHGAP20      | -      |
| ENSG00000137731 | 5.13E-15 | -2.63127 | 1 | 1 FXYD2         | K01538 |
| ENSG00000137747 | 5.13E-15 | -2.63127 | 1 | 1 TMPRSS13      | K09643 |
| ENSG00000137757 | 5.13E-15 | -2.63127 | 1 | 1 CASP5         | K04395 |
| ENSG00000137766 | 5.13E-15 | -2.63127 | 1 | 1 UNC13C        | K15293 |
| ENSG00000137808 | 5.13E-15 | -2.63127 | 1 | 1 RP11-809H16.2 | -      |
| ENSG00000137809 | 5.13E-15 | -2.63127 | 1 | 1 ITGA11        | K06587 |
| ENSG00000137860 | 5.13E-15 | -2.63127 | 1 | 1 SLC28A2       | K11536 |
| ENSG00000137875 | 5.13E-15 | -2.63127 | 1 | 1 BCL2L10       | K18451 |
| ENSG00000138068 | 5.13E-15 | -2.63127 | 1 | 1 SULT6B1       | -      |
| ENSG00000138083 | 5.13E-15 | -2.63127 | 1 | 1 SIX3          | K19473 |
| ENSG00000138109 | 5.13E-15 | -2.63127 | 1 | 1 CYP2C9        | K17719 |
| ENSG00000138115 | 5.13E-15 | -2.63127 | 1 | 1 CYP2C8        | K17718 |
| ENSG00000138135 | 5.13E-15 | -2.63127 | 1 | 1 CH25H         | K10223 |
| ENSG00000138136 | 5.13E-15 | -2.63127 | 1 | 1 LBX1          | K09353 |
| ENSG00000138207 | 5.13E-15 | -2.63127 | 1 | 1 RBP4          | K18271 |
| ENSG00000138294 | 5.13E-15 | -2.63127 | 1 | 1 MSMB          | -      |
| ENSG00000138308 | 5.13E-15 | -2.63127 | 1 | 1 PLA2G12B      | K01047 |
| ENSG00000138311 | 5.13E-15 | -2.63127 | 1 | 1 ZNF365        | K16737 |
| ENSG00000138379 | 5.13E-15 | -2.63127 | 1 | 1 MSTN          | K05497 |
| ENSG00000138395 | 5.13E-15 | -2.63127 | 1 | 1 CDK15         | K15594 |
| ENSG00000138435 | 5.13E-15 | -2.63127 | 1 | 1 CHRNA1        | K04803 |
| ENSG00000138449 | 5.13E-15 | -2.63127 | 1 | 1 SLC40A1       | K14685 |
| ENSG00000138472 | 5.13E-15 | -2.63127 | 1 | 1 GUCA1C        | K08328 |
| ENSG00000138587 | 5.13E-15 | -2.63127 | 1 | 1 MNS1          | -      |
| ENSG00000138615 | 5.13E-15 | -2.63127 | 1 | 1 CILP          | -      |
| ENSG00000138622 | 5.13E-15 | -2.63127 | 1 | 1 HCN4          | K04957 |
| ENSG00000138653 | 5.13E-15 | -2.63127 | 1 | 1 NDST4         | K02579 |
| ENSG00000138669 | 5.13E-15 | -2.63127 | 1 | 1 PRKG2         | K19477 |
| ENSG00000138670 | 5.13E-15 | -2.63127 | 1 | 1 RASGEF1B      | K19477 |
| ENSG00000138675 | 5.13E-15 | -2.63127 | 1 | 1 FGF5          | K04358 |
| ENSG00000138684 | 5.13E-15 | -2.63127 | 1 | 1 IL21          | K05434 |
| ENSG00000138722 | 5.13E-15 | -2.63127 | 1 | 1 MMRN1         | -      |
| ENSG00000138738 | 5.13E-15 | -2.63127 | 1 | 1 PRDM5         | -      |
| ENSG00000138741 | 5.13E-15 | -2.63127 | 1 | 1 TRPC3         | K04966 |
| ENSG00000138755 | 5.13E-15 | -2.63127 | 1 | 1 CXCL9         | K05416 |
| ENSG00000138792 | 5.13E-15 | -2.63127 | 1 | 1 ENPEP         | K11141 |
| ENSG00000138795 | 5.13E-15 | -2.63127 | 1 | 1 LEF1          | K04492 |
| ENSG00000138813 | 5.13E-15 | -2.63127 | 1 | 1 C4orf17       | -      |
| ENSG00000139053 | 5.13E-15 | -2.63127 | 1 | 1 PDE6H         | K13760 |
| ENSG00000139055 | 5.13E-15 | -2.63127 | 1 | 1 ERP27         | -      |
| ENSG00000139144 | 5.13E-15 | -2.63127 | 1 | 1 PIK3C2G       | K00923 |
| ENSG00000139151 | 5.13E-15 | -2.63127 | 1 | 1 PLCZ1         | K05861 |
| ENSG00000139155 | 5.13E-15 | -2.63127 | 1 | 1 SLCO1C1       | K08747 |
| ENSG00000139174 | 5.13E-15 | -2.63127 | 1 | 1 PRICKLE1      | K04511 |
| ENSG00000139220 | 5.13E-15 | -2.63127 | 1 | 1 PPFIA2        | -      |
| ENSG00000139223 | 5.13E-15 | -2.63127 | 1 | 1 ANP32D        | K18646 |
| ENSG00000139287 | 5.13E-15 | -2.63127 | 1 | 1 TPH2          | K00502 |
| ENSG00000139304 | 5.13E-15 | -2.63127 | 1 | 1 PTPRQ         | K16910 |

|                 |          |          |   |             |        |
|-----------------|----------|----------|---|-------------|--------|
| ENSG00000139330 | 5.13E-15 | -2.63127 | 1 | 1 KERA      | K08123 |
| ENSG00000139352 | 5.13E-15 | -2.63127 | 1 | 1 ASCL1     | K09067 |
| ENSG00000139364 | 5.13E-15 | -2.63127 | 1 | 1 TMEM132B  | K17599 |
| ENSG00000139445 | 5.13E-15 | -2.63127 | 1 | 1 FOXN4     | K09407 |
| ENSG00000139515 | 5.13E-15 | -2.63127 | 1 | 1 PDX1      | K07594 |
| ENSG00000139574 | 5.13E-15 | -2.63127 | 1 | 1 NPFF      | K05247 |
| ENSG00000139610 | 5.13E-15 | -2.63127 | 1 | 1 CELA1     | K01326 |
| ENSG00000139648 | 5.13E-15 | -2.63127 | 1 | 1 KRT71     | K07605 |
| ENSG00000139714 | 5.13E-15 | -2.63127 | 1 | 1 MORN3     | -      |
| ENSG00000139737 | 5.13E-15 | -2.63127 | 1 | 1 SLAIN1    | K16580 |
| ENSG00000139780 | 5.13E-15 | -2.63127 | 1 | 1 METTL21C  | -      |
| ENSG00000139797 | 5.13E-15 | -2.63127 | 1 | 1 RNF113B   | K15696 |
| ENSG00000139910 | 5.13E-15 | -2.63127 | 1 | 1 NOVA1     | K14944 |
| ENSG00000139970 | 5.13E-15 | -2.63127 | 1 | 1 RTN1      | -      |
| ENSG00000140015 | 5.13E-15 | -2.63127 | 1 | 1 KCNH5     | K04908 |
| ENSG00000140030 | 5.13E-15 | -2.63127 | 1 | 1 GPR65     | K08416 |
| ENSG00000140067 | 5.13E-15 | -2.63127 | 1 | 1 FAM181A   | -      |
| ENSG00000140090 | 5.13E-15 | -2.63127 | 1 | 1 SLC24A4   | K13752 |
| ENSG00000140093 | 5.13E-15 | -2.63127 | 1 | 1 SERPINA10 | K04525 |
| ENSG00000140254 | 5.13E-15 | -2.63127 | 1 | 1 DUOXA1    | K17233 |
| ENSG00000140274 | 5.13E-15 | -2.63127 | 1 | 1 DUOXA2    | K17232 |
| ENSG00000140279 | 5.13E-15 | -2.63127 | 1 | 1 DUOX2     | K13411 |
| ENSG00000140379 | 5.13E-15 | -2.63127 | 1 | 1 BCL2A1    | K02162 |
| ENSG00000140470 | 5.13E-15 | -2.63127 | 1 | 1 ADAMTS17  | K08631 |
| ENSG00000140478 | 5.13E-15 | -2.63127 | 1 | 1 GOLGA6D   | K10595 |
| ENSG00000140488 | 5.13E-15 | -2.63127 | 1 | 1 CELF6     | K13207 |
| ENSG00000140506 | 5.13E-15 | -2.63127 | 1 | 1 LMAN1L    | K10081 |
| ENSG00000140522 | 5.13E-15 | -2.63127 | 1 | 1 RLBP1     | K19625 |
| ENSG00000140538 | 5.13E-15 | -2.63127 | 1 | 1 NTRK3     | K05101 |
| ENSG00000140600 | 5.13E-15 | -2.63127 | 1 | 1 SH3GL3    | K11247 |
| ENSG00000140682 | 5.13E-15 | -2.63127 | 1 | 1 TGFB1I1   | -      |
| ENSG00000140798 | 5.13E-15 | -2.63127 | 1 | 1 ABCC12    | K05672 |
| ENSG00000140807 | 5.13E-15 | -2.63127 | 1 | 1 NKD1      | K03213 |
| ENSG00000140835 | 5.13E-15 | -2.63127 | 1 | 1 CHST4     | K04746 |
| ENSG00000140937 | 5.13E-15 | -2.63127 | 1 | 1 CDH11     | K06803 |
| ENSG00000140945 | 5.13E-15 | -2.63127 | 1 | 1 CDH13     | K06808 |
| ENSG00000140955 | 5.13E-15 | -2.63127 | 1 | 1 ADAD2     | -      |
| ENSG00000140968 | 5.13E-15 | -2.63127 | 1 | 1 IRF8      | K10155 |
| ENSG00000141040 | 5.13E-15 | -2.63127 | 1 | 1 ZNF287    | K09229 |
| ENSG00000141096 | 5.13E-15 | -2.63127 | 1 | 1 DPEP3     | K01273 |
| ENSG00000141161 | 5.13E-15 | -2.63127 | 1 | 1 UNC45B    | -      |
| ENSG00000141194 | 5.13E-15 | -2.63127 | 1 | 1 OR4D1     | K04257 |
| ENSG00000141200 | 5.13E-15 | -2.63127 | 1 | 1 KIF2B     | K10393 |
| ENSG00000141255 | 5.13E-15 | -2.63127 | 1 | 1 SPATA22   | -      |
| ENSG00000141293 | 5.13E-15 | -2.63127 | 1 | 1 SKAP1     | K17699 |
| ENSG00000141314 | 5.13E-15 | -2.63127 | 1 | 1 RHBDL3    | K02857 |
| ENSG00000141316 | 5.13E-15 | -2.63127 | 1 | 1 SPACA3    | -      |
| ENSG00000141338 | 5.13E-15 | -2.63127 | 1 | 1 ABCA8     | K05650 |
| ENSG00000141371 | 5.13E-15 | -2.63127 | 1 | 1 C17orf64  | -      |
| ENSG00000141431 | 5.13E-15 | -2.63127 | 1 | 1 ASXL3     | K11471 |
| ENSG00000141433 | 5.13E-15 | -2.63127 | 1 | 1 ADCYAP1   | K05262 |
| ENSG00000141437 | 5.13E-15 | -2.63127 | 1 | 1 SLC25A52  | -      |
| ENSG00000141485 | 5.13E-15 | -2.63127 | 1 | 1 SLC13A5   | K14445 |
| ENSG00000141506 | 5.13E-15 | -2.63127 | 1 | 1 PIK3R5    | K02649 |
| ENSG00000141665 | 5.13E-15 | -2.63127 | 1 | 1 FBXO15    | K10298 |
| ENSG00000141668 | 5.13E-15 | -2.63127 | 1 | 1 CBLN2     | -      |
| ENSG00000141744 | 5.13E-15 | -2.63127 | 1 | 1 PNMT      | K00553 |
| ENSG00000141753 | 5.13E-15 | -2.63127 | 1 | 1 IGFBP4    | -      |

|                 |          |          |   |                 |        |
|-----------------|----------|----------|---|-----------------|--------|
| ENSG00000141946 | 5.13E-15 | -2.63127 | 1 | 1 ZIM3          | K09228 |
| ENSG00000141977 | 5.13E-15 | -2.63127 | 1 | 1 CIB3          | -      |
| ENSG00000141979 | 5.13E-15 | -2.63127 | 1 | 1 CTD-3222D19.2 | K15169 |
| ENSG00000142025 | 5.13E-15 | -2.63127 | 1 | 1 DMRTC2        | K19493 |
| ENSG00000142149 | 5.13E-15 | -2.63127 | 1 | 1 HUNK          | K08797 |
| ENSG00000142163 | 5.13E-15 | -2.63127 | 1 | 1 OR1E3         | K04257 |
| ENSG00000142273 | 5.13E-15 | -2.63127 | 1 | 1 CBLC          | K04707 |
| ENSG00000142484 | 5.13E-15 | -2.63127 | 1 | 1 TM4SF5        | -      |
| ENSG00000142511 | 5.13E-15 | -2.63127 | 1 | 1 GPR32         | K08381 |
| ENSG00000142512 | 5.13E-15 | -2.63127 | 1 | 1 SIGLEC10      | K06749 |
| ENSG00000142515 | 5.13E-15 | -2.63127 | 1 | 1 KLK3          | K01351 |
| ENSG00000142539 | 5.13E-15 | -2.63127 | 1 | 1 CTD-2545M3.6  | K09439 |
| ENSG00000142606 | 5.13E-15 | -2.63127 | 1 | 1 MMEL1         | K08635 |
| ENSG00000142698 | 5.13E-15 | -2.63127 | 1 | 1 C1orf94       | -      |
| ENSG00000142748 | 5.13E-15 | -2.63127 | 1 | 1 FCN3          | K10104 |
| ENSG00000142789 | 5.13E-15 | -2.63127 | 1 | 1 CELA3A        | K01345 |
| ENSG00000142794 | 5.13E-15 | -2.63127 | 1 | 1 NBPF3         | -      |
| ENSG00000142973 | 5.13E-15 | -2.63127 | 1 | 1 CYP4B1        | K07426 |
| ENSG00000143006 | 5.13E-15 | -2.63127 | 1 | 1 DMRTB1        | K19492 |
| ENSG00000143032 | 5.13E-15 | -2.63127 | 1 | 1 BARHL2        | K09360 |
| ENSG00000143105 | 5.13E-15 | -2.63127 | 1 | 1 KCNA10        | K04881 |
| ENSG00000143125 | 5.13E-15 | -2.63127 | 1 | 1 PROK1         | -      |
| ENSG00000143127 | 5.13E-15 | -2.63127 | 1 | 1 ITGA10        | K06586 |
| ENSG00000143167 | 5.13E-15 | -2.63127 | 1 | 1 GPA33         | K06790 |
| ENSG00000143171 | 5.13E-15 | -2.63127 | 1 | 1 RXRG          | K08526 |
| ENSG00000143194 | 5.13E-15 | -2.63127 | 1 | 1 MAEL          | K18411 |
| ENSG00000143195 | 5.13E-15 | -2.63127 | 1 | 1 ILDR2         | K12756 |
| ENSG00000143196 | 5.13E-15 | -2.63127 | 1 | 1 DPT           | -      |
| ENSG00000143278 | 5.13E-15 | -2.63127 | 1 | 1 F13B          | K03906 |
| ENSG00000143297 | 5.13E-15 | -2.63127 | 1 | 1 FCRL5         | K06727 |
| ENSG00000143333 | 5.13E-15 | -2.63127 | 1 | 1 RGS16         | K16449 |
| ENSG00000143340 | 5.13E-15 | -2.63127 | 1 | 1 FAM163A       | -      |
| ENSG00000143341 | 5.13E-15 | -2.63127 | 1 | 1 HMCN1         | K17341 |
| ENSG00000143469 | 5.13E-15 | -2.63127 | 1 | 1 SYT14         | K19328 |
| ENSG00000143473 | 5.13E-15 | -2.63127 | 1 | 1 KCNH1         | K04904 |
| ENSG00000143502 | 5.13E-15 | -2.63127 | 1 | 1 SUSD4         | -      |
| ENSG00000143520 | 5.13E-15 | -2.63127 | 1 | 1 FLG2          | K10384 |
| ENSG00000143536 | 5.13E-15 | -2.63127 | 1 | 1 CRNN          | -      |
| ENSG00000143595 | 5.13E-15 | -2.63127 | 1 | 1 AQP10         | K09878 |
| ENSG00000143627 | 5.13E-15 | -2.63127 | 1 | 1 PKLR          | K12406 |
| ENSG00000143630 | 5.13E-15 | -2.63127 | 1 | 1 HCN3          | -      |
| ENSG00000143768 | 5.13E-15 | -2.63127 | 1 | 1 LEFTY2        | K04668 |
| ENSG00000143851 | 5.13E-15 | -2.63127 | 1 | 1 PTPN7         | K18019 |
| ENSG00000143867 | 5.13E-15 | -2.63127 | 1 | 1 OSR1          | -      |
| ENSG00000143869 | 5.13E-15 | -2.63127 | 1 | 1 GDF7          | K04664 |
| ENSG00000143921 | 5.13E-15 | -2.63127 | 1 | 1 ABCG8         | K05684 |
| ENSG00000143954 | 5.13E-15 | -2.63127 | 1 | 1 REG3G         | -      |
| ENSG00000144010 | 5.13E-15 | -2.63127 | 1 | 1 TRIM43B       | K12019 |
| ENSG00000144015 | 5.13E-15 | -2.63127 | 1 | 1 TRIM43        | K12019 |
| ENSG00000144031 | 5.13E-15 | -2.63127 | 1 | 1 ANKRD53       | -      |
| ENSG00000144043 | 5.13E-15 | -2.63127 | 1 | 1 TEX261        | -      |
| ENSG00000144057 | 5.13E-15 | -2.63127 | 1 | 1 ST6GAL2       | K00779 |
| ENSG00000144115 | 5.13E-15 | -2.63127 | 1 | 1 THNSL2        | -      |
| ENSG00000144119 | 5.13E-15 | -2.63127 | 1 | 1 C1QL2         | -      |
| ENSG00000144140 | 5.13E-15 | -2.63127 | 1 | 1 RP11-143M1.7  | K15636 |
| ENSG00000144152 | 5.13E-15 | -2.63127 | 1 | 1 FBLN7         | K17342 |
| ENSG00000144188 | 5.13E-15 | -2.63127 | 1 | 1 TRIM43CP      | K12019 |
| ENSG00000144191 | 5.13E-15 | -2.63127 | 1 | 1 CNGA3         | K04950 |

|                 |          |          |   |                |        |
|-----------------|----------|----------|---|----------------|--------|
| ENSG00000144218 | 5.13E-15 | -2.63127 | 1 | 1 AFF3         | K15195 |
| ENSG00000144227 | 5.13E-15 | -2.63127 | 1 | 1 NXPB2        | K16657 |
| ENSG00000144290 | 5.13E-15 | -2.63127 | 1 | 1 SLC4A10      | K13861 |
| ENSG00000144331 | 5.13E-15 | -2.63127 | 1 | 1 ZNF385B      | -      |
| ENSG00000144339 | 5.13E-15 | -2.63127 | 1 | 1 TMEFF2       | -      |
| ENSG00000144406 | 5.13E-15 | -2.63127 | 1 | 1 UNC80        | -      |
| ENSG00000144407 | 5.13E-15 | -2.63127 | 1 | 1 PTH2R        | K04586 |
| ENSG00000144410 | 5.13E-15 | -2.63127 | 1 | 1 CPO          | -      |
| ENSG00000144451 | 5.13E-15 | -2.63127 | 1 | 1 SPAG16       | -      |
| ENSG00000144481 | 5.13E-15 | -2.63127 | 1 | 1 TRPM8        | K04983 |
| ENSG00000144619 | 5.13E-15 | -2.63127 | 1 | 1 CNTN4        | K06762 |
| ENSG00000144644 | 5.13E-15 | -2.63127 | 1 | 1 GADL1        | K18966 |
| ENSG00000144648 | 5.13E-15 | -2.63127 | 1 | 1 ACKR2        | K04187 |
| ENSG00000144649 | 5.13E-15 | -2.63127 | 1 | 1 FAM198A      | -      |
| ENSG00000144668 | 5.13E-15 | -2.63127 | 1 | 1 ITGA9        | K06585 |
| ENSG00000144681 | 5.13E-15 | -2.63127 | 1 | 1 STAC         | -      |
| ENSG00000144820 | 5.13E-15 | -2.63127 | 1 | 1 GPR128       | K08464 |
| ENSG00000144834 | 5.13E-15 | -2.63127 | 1 | 1 TAGLN3       | -      |
| ENSG00000144843 | 5.13E-15 | -2.63127 | 1 | 1 ADPRH        | K01245 |
| ENSG00000144847 | 5.13E-15 | -2.63127 | 1 | 1 IGSF11       | K06791 |
| ENSG00000144857 | 5.13E-15 | -2.63127 | 1 | 1 BOC          | -      |
| ENSG00000144868 | 5.13E-15 | -2.63127 | 1 | 1 TMEM108      | K12581 |
| ENSG00000144891 | 5.13E-15 | -2.63127 | 1 | 1 AGTR1        | K04166 |
| ENSG00000144908 | 5.13E-15 | -2.63127 | 1 | 1 ALDH1L1      | K00289 |
| ENSG00000144962 | 5.13E-15 | -2.63127 | 1 | 1 SPATA16      | -      |
| ENSG00000145103 | 5.13E-15 | -2.63127 | 1 | 1 ILDR1        | -      |
| ENSG00000145147 | 5.13E-15 | -2.63127 | 1 | 1 SLIT2        | K06839 |
| ENSG00000145192 | 5.13E-15 | -2.63127 | 1 | 1 AHSB         | -      |
| ENSG00000145247 | 5.13E-15 | -2.63127 | 1 | 1 OCIAD2       | -      |
| ENSG00000145283 | 5.13E-15 | -2.63127 | 1 | 1 SLC10A6      | K14346 |
| ENSG00000145309 | 5.13E-15 | -2.63127 | 1 | 1 CABS1        | -      |
| ENSG00000145321 | 5.13E-15 | -2.63127 | 1 | 1 GC           | K12258 |
| ENSG00000145358 | 5.13E-15 | -2.63127 | 1 | 1 DDIT4L       | -      |
| ENSG00000145362 | 5.13E-15 | -2.63127 | 1 | 1 ANK2         | K10380 |
| ENSG00000145384 | 5.13E-15 | -2.63127 | 1 | 1 FABP2        | K08751 |
| ENSG00000145423 | 5.13E-15 | -2.63127 | 1 | 1 SFRP2        | K02176 |
| ENSG00000145428 | 5.13E-15 | -2.63127 | 1 | 1 RNF175       | -      |
| ENSG00000145476 | 5.13E-15 | -2.63127 | 1 | 1 CYP4V2       | K07427 |
| ENSG00000145526 | 5.13E-15 | -2.63127 | 1 | 1 CDH18        | K06805 |
| ENSG00000145626 | 5.13E-15 | -2.63127 | 1 | 1 UGT3A1       | -      |
| ENSG00000145642 | 5.13E-15 | -2.63127 | 1 | 1 FAM159B      | -      |
| ENSG00000145649 | 5.13E-15 | -2.63127 | 1 | 1 GZMA         | K01352 |
| ENSG00000145692 | 5.13E-15 | -2.63127 | 1 | 1 BHMT         | K00544 |
| ENSG00000145708 | 5.13E-15 | -2.63127 | 1 | 1 CRHBP        | -      |
| ENSG00000145721 | 5.13E-15 | -2.63127 | 1 | 1 LIX1         | -      |
| ENSG00000145723 | 5.13E-15 | -2.63127 | 1 | 1 GIN1         | -      |
| ENSG00000145734 | 5.13E-15 | -2.63127 | 1 | 1 BDP1         | K15198 |
| ENSG00000145777 | 5.13E-15 | -2.63127 | 1 | 1 TSLP         | K05436 |
| ENSG00000145794 | 5.13E-15 | -2.63127 | 1 | 1 MEGF10       | -      |
| ENSG00000145808 | 5.13E-15 | -2.63127 | 1 | 1 ADAMTS19     | K08633 |
| ENSG00000145824 | 5.13E-15 | -2.63127 | 1 | 1 CXCL14       | K10033 |
| ENSG00000145826 | 5.13E-15 | -2.63127 | 1 | 1 LECT2        | -      |
| ENSG00000145832 | 5.13E-15 | -2.63127 | 1 | 1 SLC25A48     | K15124 |
| ENSG00000145835 | 5.13E-15 | -2.63127 | 1 | 1 CDKN2AIPNLP2 | -      |
| ENSG00000145839 | 5.13E-15 | -2.63127 | 1 | 1 IL9          | K05432 |
| ENSG00000145850 | 5.13E-15 | -2.63127 | 1 | 1 TIMD4        | -      |
| ENSG00000145863 | 5.13E-15 | -2.63127 | 1 | 1 GABRA6       | -      |
| ENSG00000145864 | 5.13E-15 | -2.63127 | 1 | 1 GABRB2       | K05181 |

|                 |          |          |   |              |        |
|-----------------|----------|----------|---|--------------|--------|
| ENSG00000145888 | 5.13E-15 | -2.63127 | 1 | 1 GLRA1      | K05193 |
| ENSG00000145920 | 5.13E-15 | -2.63127 | 1 | 1 CPLX2      | K15294 |
| ENSG00000146001 | 5.13E-15 | -2.63127 | 1 | 1 PCDHB18    | K16494 |
| ENSG00000146038 | 5.13E-15 | -2.63127 | 1 | 1 DCDC2      | K15696 |
| ENSG00000146039 | 5.13E-15 | -2.63127 | 1 | 1 SLC17A4    | K12300 |
| ENSG00000146047 | 5.13E-15 | -2.63127 | 1 | 1 HIST1H2BA  | K11252 |
| ENSG00000146049 | 5.13E-15 | -2.63127 | 1 | 1 KAAG1      | -      |
| ENSG00000146070 | 5.13E-15 | -2.63127 | 1 | 1 PLA2G7     | K01062 |
| ENSG00000146112 | 5.13E-15 | -2.63127 | 1 | 1 PPP1R18    | K17559 |
| ENSG00000146122 | 5.13E-15 | -2.63127 | 1 | 1 DAAM2      | K04512 |
| ENSG00000146147 | 5.13E-15 | -2.63127 | 1 | 1 MLIP       | -      |
| ENSG00000146151 | 5.13E-15 | -2.63127 | 1 | 1 HMGCLL1    | K01640 |
| ENSG00000146192 | 5.13E-15 | -2.63127 | 1 | 1 FGD2       | K05721 |
| ENSG00000146215 | 5.13E-15 | -2.63127 | 1 | 1 CRIP3      | -      |
| ENSG00000146250 | 5.13E-15 | -2.63127 | 1 | 1 PRSS35     | -      |
| ENSG00000146285 | 5.13E-15 | -2.63127 | 1 | 1 SCML4      | K11466 |
| ENSG00000146350 | 5.13E-15 | -2.63127 | 1 | 1 TBC1D32    | K02927 |
| ENSG00000146352 | 5.13E-15 | -2.63127 | 1 | 1 CLVS2      | -      |
| ENSG00000146360 | 5.13E-15 | -2.63127 | 1 | 1 GPR6       | K04313 |
| ENSG00000146374 | 5.13E-15 | -2.63127 | 1 | 1 RSPO3      | -      |
| ENSG00000146378 | 5.13E-15 | -2.63127 | 1 | 1 TAAR2      | K05051 |
| ENSG00000146383 | 5.13E-15 | -2.63127 | 1 | 1 TAAR6      | K05051 |
| ENSG00000146385 | 5.13E-15 | -2.63127 | 1 | 1 TAAR8      | K05051 |
| ENSG00000146386 | 5.13E-15 | -2.63127 | 1 | 1 ABRACL     | -      |
| ENSG00000146399 | 5.13E-15 | -2.63127 | 1 | 1 TAAR1      | K05051 |
| ENSG00000146453 | 5.13E-15 | -2.63127 | 1 | 1 PNLDC1     | -      |
| ENSG00000146521 | 5.13E-15 | -2.63127 | 1 | 1 C6orf123   | K12581 |
| ENSG00000146555 | 5.13E-15 | -2.63127 | 1 | 1 SDK1       | K16353 |
| ENSG00000146618 | 5.13E-15 | -2.63127 | 1 | 1 FERD3L     | -      |
| ENSG00000146678 | 5.13E-15 | -2.63127 | 1 | 1 IGFBP1     | -      |
| ENSG00000146722 | 5.13E-15 | -2.63127 | 1 | 1 AC006014.8 | K09572 |
| ENSG00000146755 | 5.13E-15 | -2.63127 | 1 | 1 TRIM50     | K12024 |
| ENSG00000146802 | 5.13E-15 | -2.63127 | 1 | 1 TMEM168    | K17985 |
| ENSG00000146809 | 5.13E-15 | -2.63127 | 1 | 1 ASB15      | K10337 |
| ENSG00000146857 | 5.13E-15 | -2.63127 | 1 | 1 STRA8      | -      |
| ENSG00000146910 | 5.13E-15 | -2.63127 | 1 | 1 CNPY1      | -      |
| ENSG00000146926 | 5.13E-15 | -2.63127 | 1 | 1 ASB10      | K10332 |
| ENSG00000146950 | 5.13E-15 | -2.63127 | 1 | 1 SHROOM2    | K18625 |
| ENSG00000147027 | 5.13E-15 | -2.63127 | 1 | 1 TMEM47     | -      |
| ENSG00000147036 | 5.13E-15 | -2.63127 | 1 | 1 LANCL3     | K19522 |
| ENSG00000147041 | 5.13E-15 | -2.63127 | 1 | 1 SYTL5      | K17598 |
| ENSG00000147059 | 5.13E-15 | -2.63127 | 1 | 1 SPIN2A     | -      |
| ENSG00000147081 | 5.13E-15 | -2.63127 | 1 | 1 AKAP4      | K16521 |
| ENSG00000147113 | 5.13E-15 | -2.63127 | 1 | 1 CXorf36    | -      |
| ENSG00000147117 | 5.13E-15 | -2.63127 | 1 | 1 ZNF157     | K09228 |
| ENSG00000147118 | 5.13E-15 | -2.63127 | 1 | 1 ZNF182     | K09228 |
| ENSG00000147138 | 5.13E-15 | -2.63127 | 1 | 1 GPR174     | K08391 |
| ENSG00000147155 | 5.13E-15 | -2.63127 | 1 | 1 EBP        | K01824 |
| ENSG00000147160 | 5.13E-15 | -2.63127 | 1 | 1 AWAT2      | K11156 |
| ENSG00000147180 | 5.13E-15 | -2.63127 | 1 | 1 ZNF711     | -      |
| ENSG00000147223 | 5.13E-15 | -2.63127 | 1 | 1 RIPPLY1    | -      |
| ENSG00000147231 | 5.13E-15 | -2.63127 | 1 | 1 CXorf57    | -      |
| ENSG00000147246 | 5.13E-15 | -2.63127 | 1 | 1 HTR2C      | K04157 |
| ENSG00000147256 | 5.13E-15 | -2.63127 | 1 | 1 ARHGAP36   | -      |
| ENSG00000147257 | 5.13E-15 | -2.63127 | 1 | 1 GPC3       | K08109 |
| ENSG00000147262 | 5.13E-15 | -2.63127 | 1 | 1 GPR119     | K08424 |
| ENSG00000147364 | 5.13E-15 | -2.63127 | 1 | 1 FBXO25     | K10305 |
| ENSG00000147378 | 5.13E-15 | -2.63127 | 1 | 1 FATE1      | -      |



|                 |          |          |   |             |        |
|-----------------|----------|----------|---|-------------|--------|
| ENSG00000147380 | 5.13E-15 | -2.63127 | 1 | 1 OPN1MW    | K04251 |
| ENSG00000147381 | 5.13E-15 | -2.63127 | 1 | 1 MAGEA4    | -      |
| ENSG00000147432 | 5.13E-15 | -2.63127 | 1 | 1 CHRNB3    | K04814 |
| ENSG00000147434 | 5.13E-15 | -2.63127 | 1 | 1 CHRNA6    | K04808 |
| ENSG00000147443 | 5.13E-15 | -2.63127 | 1 | 1 DOK2      | -      |
| ENSG00000147481 | 5.13E-15 | -2.63127 | 1 | 1 SNTG1     | -      |
| ENSG00000147570 | 5.13E-15 | -2.63127 | 1 | 1 DNAJC5B   | K09525 |
| ENSG00000147571 | 5.13E-15 | -2.63127 | 1 | 1 CRH       | K05256 |
| ENSG00000147573 | 5.13E-15 | -2.63127 | 1 | 1 TRIM55    | K10654 |
| ENSG00000147596 | 5.13E-15 | -2.63127 | 1 | 1 PRDM14    | -      |
| ENSG00000147606 | 5.13E-15 | -2.63127 | 1 | 1 SLC26A7   | K13962 |
| ENSG00000147613 | 5.13E-15 | -2.63127 | 1 | 1 PSKH2     | K08808 |
| ENSG00000147647 | 5.13E-15 | -2.63127 | 1 | 1 DPYS      | K01464 |
| ENSG00000147655 | 5.13E-15 | -2.63127 | 1 | 1 RSPO2     | -      |
| ENSG00000147753 | 5.13E-15 | -2.63127 | 1 | 1 TTTY7     | -      |
| ENSG00000147761 | 5.13E-15 | -2.63127 | 1 | 1 TTTY7B    | -      |
| ENSG00000147869 | 5.13E-15 | -2.63127 | 1 | 1 CER1      | K01645 |
| ENSG00000147873 | 5.13E-15 | -2.63127 | 1 | 1 IFNA5     | K05414 |
| ENSG00000147885 | 5.13E-15 | -2.63127 | 1 | 1 IFNA16    | K05414 |
| ENSG00000147926 | 5.13E-15 | -2.63127 | 1 | 1 SPATA31A3 | -      |
| ENSG00000148053 | 5.13E-15 | -2.63127 | 1 | 1 NTRK2     | K04360 |
| ENSG00000148082 | 5.13E-15 | -2.63127 | 1 | 1 SHC3      | K17448 |
| ENSG00000148123 | 5.13E-15 | -2.63127 | 1 | 1 LPPR1     | K19581 |
| ENSG00000148136 | 5.13E-15 | -2.63127 | 1 | 1 OR13C4    | K04257 |
| ENSG00000148156 | 5.13E-15 | -2.63127 | 1 | 1 ACTL7B    | -      |
| ENSG00000148215 | 5.13E-15 | -2.63127 | 1 | 1 OR5C1     | K04257 |
| ENSG00000148288 | 5.13E-15 | -2.63127 | 1 | 1 GBGT1     | K00722 |
| ENSG00000148386 | 5.13E-15 | -2.63127 | 1 | 1 LCN9      | -      |
| ENSG00000148408 | 5.13E-15 | -2.63127 | 1 | 1 CACNA1B   | K04849 |
| ENSG00000148468 | 5.13E-15 | -2.63127 | 1 | 1 FAM171A1  | -      |
| ENSG00000148482 | 5.13E-15 | -2.63127 | 1 | 1 SLC39A12  | K14718 |
| ENSG00000148483 | 5.13E-15 | -2.63127 | 1 | 1 TMEM236   | K14404 |
| ENSG00000148488 | 5.13E-15 | -2.63127 | 1 | 1 ST8SIA6   | K06615 |
| ENSG00000148513 | 5.13E-15 | -2.63127 | 1 | 1 ANKRD30A  | K17299 |
| ENSG00000148541 | 5.13E-15 | -2.63127 | 1 | 1 FAM13C    | -      |
| ENSG00000148584 | 5.13E-15 | -2.63127 | 1 | 1 A1CF      | -      |
| ENSG00000148600 | 5.13E-15 | -2.63127 | 1 | 1 CDHR1     | K16501 |
| ENSG00000148602 | 5.13E-15 | -2.63127 | 1 | 1 LRIT1     | -      |
| ENSG00000148604 | 5.13E-15 | -2.63127 | 1 | 1 RGR       | K04254 |
| ENSG00000148655 | 5.13E-15 | -2.63127 | 1 | 1 C10orf11  | K12022 |
| ENSG00000148671 | 5.13E-15 | -2.63127 | 1 | 1 ADIRF     | -      |
| ENSG00000148702 | 5.13E-15 | -2.63127 | 1 | 1 HABP2     | K08648 |
| ENSG00000148704 | 5.13E-15 | -2.63127 | 1 | 1 VAX1      | K09318 |
| ENSG00000148734 | 5.13E-15 | -2.63127 | 1 | 1 NPFFR1    | K04240 |
| ENSG00000148798 | 5.13E-15 | -2.63127 | 1 | 1 INA       | K07608 |
| ENSG00000148826 | 5.13E-15 | -2.63127 | 1 | 1 NKX6-2    | K09350 |
| ENSG00000148935 | 5.13E-15 | -2.63127 | 1 | 1 GAS2      | -      |
| ENSG00000148942 | 5.13E-15 | -2.63127 | 1 | 1 SLC5A12   | K14388 |
| ENSG00000148948 | 5.13E-15 | -2.63127 | 1 | 1 LRRC4C    | K07523 |
| ENSG00000148965 | 5.13E-15 | -2.63127 | 1 | 1 SAA4      | K17310 |
| ENSG00000149021 | 5.13E-15 | -2.63127 | 1 | 1 SCGB1A1   | -      |
| ENSG00000149043 | 5.13E-15 | -2.63127 | 1 | 1 SYT8      | -      |
| ENSG00000149090 | 5.13E-15 | -2.63127 | 1 | 1 PAMR1     | -      |
| ENSG00000149124 | 5.13E-15 | -2.63127 | 1 | 1 GLYAT     | K00628 |
| ENSG00000149133 | 5.13E-15 | -2.63127 | 1 | 1 OR5F1     | K04257 |
| ENSG00000149256 | 5.13E-15 | -2.63127 | 1 | 1 TENM4     | -      |
| ENSG00000149260 | 5.13E-15 | -2.63127 | 1 | 1 CAPN5     | K08574 |
| ENSG00000149294 | 5.13E-15 | -2.63127 | 1 | 1 NCAM1     | K06491 |

|                 |          |          |   |                |        |
|-----------------|----------|----------|---|----------------|--------|
| ENSG00000149295 | 5.13E-15 | -2.63127 | 1 | 1 DRD2         | K04145 |
| ENSG00000149300 | 5.13E-15 | -2.63127 | 1 | 1 C11orf52     | -      |
| ENSG00000149305 | 5.13E-15 | -2.63127 | 1 | 1 HTR3B        | K04819 |
| ENSG00000149403 | 5.13E-15 | -2.63127 | 1 | 1 GRIK4        | K05204 |
| ENSG00000149435 | 5.13E-15 | -2.63127 | 1 | 1 GGTL1        | K18592 |
| ENSG00000149443 | 5.13E-15 | -2.63127 | 1 | 1 C20orf78     | -      |
| ENSG00000149451 | 5.13E-15 | -2.63127 | 1 | 1 ADAM33       | K08616 |
| ENSG00000149452 | 5.13E-15 | -2.63127 | 1 | 1 SLC22A8      | K08205 |
| ENSG00000149507 | 5.13E-15 | -2.63127 | 1 | 1 OOSP2        | -      |
| ENSG00000149516 | 5.13E-15 | -2.63127 | 1 | 1 MS4A3        | -      |
| ENSG00000149534 | 5.13E-15 | -2.63127 | 1 | 1 MS4A2        | K08090 |
| ENSG00000149548 | 5.13E-15 | -2.63127 | 1 | 1 CCDC15       | K16752 |
| ENSG00000149557 | 5.13E-15 | -2.63127 | 1 | 1 FEZ1         | -      |
| ENSG00000149582 | 5.13E-15 | -2.63127 | 1 | 1 TMEM25       | -      |
| ENSG00000149635 | 5.13E-15 | -2.63127 | 1 | 1 OCSTAMP      | -      |
| ENSG00000149651 | 5.13E-15 | -2.63127 | 1 | 1 SPINT4       | -      |
| ENSG00000149654 | 5.13E-15 | -2.63127 | 1 | 1 CDH22        | K06812 |
| ENSG00000149735 | 5.13E-15 | -2.63127 | 1 | 1 GPHA2        | -      |
| ENSG00000149742 | 5.13E-15 | -2.63127 | 1 | 1 SLC22A9      | K08206 |
| ENSG00000149968 | 5.13E-15 | -2.63127 | 1 | 1 MMP3         | K01394 |
| ENSG00000149970 | 5.13E-15 | -2.63127 | 1 | 1 CNKSR2       | K17536 |
| ENSG00000149972 | 5.13E-15 | -2.63127 | 1 | 1 CNTN5        | K06763 |
| ENSG00000150045 | 5.13E-15 | -2.63127 | 1 | 1 KLRF1        | K10075 |
| ENSG00000150048 | 5.13E-15 | -2.63127 | 1 | 1 CLEC1A       | K10069 |
| ENSG00000150175 | 5.13E-15 | -2.63127 | 1 | 1 FRMPD2P2     | -      |
| ENSG00000150201 | 5.13E-15 | -2.63127 | 1 | 1 FXD4         | K13359 |
| ENSG00000150244 | 5.13E-15 | -2.63127 | 1 | 1 TRIM48       | K12019 |
| ENSG00000150261 | 5.13E-15 | -2.63127 | 1 | 1 OR8K1        | K04257 |
| ENSG00000150269 | 5.13E-15 | -2.63127 | 1 | 1 OR5M9        | K04257 |
| ENSG00000150275 | 5.13E-15 | -2.63127 | 1 | 1 PCDH15       | K16500 |
| ENSG00000150276 | 5.13E-15 | -2.63127 | 1 | 1 PPIAP2       | K03767 |
| ENSG00000150337 | 5.13E-15 | -2.63127 | 1 | 1 FCGR1A       | K06498 |
| ENSG00000150361 | 5.13E-15 | -2.63127 | 1 | 1 KLHL1        | K10442 |
| ENSG00000150394 | 5.13E-15 | -2.63127 | 1 | 1 CDH8         | K06800 |
| ENSG00000150556 | 5.13E-15 | -2.63127 | 1 | 1 LYPD6B       | -      |
| ENSG00000150594 | 5.13E-15 | -2.63127 | 1 | 1 ADRA2A       | K04138 |
| ENSG00000150625 | 5.13E-15 | -2.63127 | 1 | 1 GPM6A        | -      |
| ENSG00000150627 | 5.13E-15 | -2.63127 | 1 | 1 WDR17        | -      |
| ENSG00000150628 | 5.13E-15 | -2.63127 | 1 | 1 SPATA4       | -      |
| ENSG00000150630 | 5.13E-15 | -2.63127 | 1 | 1 VEGFC        | K05449 |
| ENSG00000150637 | 5.13E-15 | -2.63127 | 1 | 1 CD226        | K06567 |
| ENSG00000150656 | 5.13E-15 | -2.63127 | 1 | 1 CNDP1        | K12581 |
| ENSG00000150722 | 5.13E-15 | -2.63127 | 1 | 1 PPP1R1C      | K17549 |
| ENSG00000150732 | 5.13E-15 | -2.63127 | 1 | 1 RP11-134C1.1 | K09228 |
| ENSG00000150750 | 5.13E-15 | -2.63127 | 1 | 1 C11orf53     | -      |
| ENSG00000150764 | 5.13E-15 | -2.63127 | 1 | 1 DIXDC1       | K00627 |
| ENSG00000150773 | 5.13E-15 | -2.63127 | 1 | 1 PIH1D2       | -      |
| ENSG00000150873 | 5.13E-15 | -2.63127 | 1 | 1 C2orf50      | -      |
| ENSG00000150893 | 5.13E-15 | -2.63127 | 1 | 1 FREM2        | -      |
| ENSG00000151005 | 5.13E-15 | -2.63127 | 1 | 1 TKTL2        | K00615 |
| ENSG00000151033 | 5.13E-15 | -2.63127 | 1 | 1 LYZL2        | K01185 |
| ENSG00000151065 | 5.13E-15 | -2.63127 | 1 | 1 DCP1B        | K12611 |
| ENSG00000151067 | 5.13E-15 | -2.63127 | 1 | 1 CACNA1C      | K04850 |
| ENSG00000151079 | 5.13E-15 | -2.63127 | 1 | 1 KCNA6        | K04879 |
| ENSG00000151136 | 5.13E-15 | -2.63127 | 1 | 1 BTBD11       | K10483 |
| ENSG00000151224 | 5.13E-15 | -2.63127 | 1 | 1 MAT1A        | K00789 |
| ENSG00000151322 | 5.13E-15 | -2.63127 | 1 | 1 NPAS3        | K09098 |
| ENSG00000151365 | 5.13E-15 | -2.63127 | 1 | 1 THRSP        | -      |

|                 |          |          |   |            |        |
|-----------------|----------|----------|---|------------|--------|
| ENSG00000151379 | 5.13E-15 | -2.63127 | 1 | 1 MSGN1    | K09077 |
| ENSG00000151388 | 5.13E-15 | -2.63127 | 1 | 1 ADAMTS12 | K08626 |
| ENSG00000151418 | 5.13E-15 | -2.63127 | 1 | 1 ATP6V1G3 | K02152 |
| ENSG00000151475 | 5.13E-15 | -2.63127 | 1 | 1 SLC25A31 | K05863 |
| ENSG00000151490 | 5.13E-15 | -2.63127 | 1 | 1 PTPRO    | K18035 |
| ENSG00000151577 | 5.13E-15 | -2.63127 | 1 | 1 DRD3     | K04146 |
| ENSG00000151612 | 5.13E-15 | -2.63127 | 1 | 1 ZNF827   | -      |
| ENSG00000151615 | 5.13E-15 | -2.63127 | 1 | 1 POU4F2   | K09366 |
| ENSG00000151631 | 5.13E-15 | -2.63127 | 1 | 1 AKR1C6P  | K04119 |
| ENSG00000151632 | 5.13E-15 | -2.63127 | 1 | 1 AKR1C2   | K00089 |
| ENSG00000151650 | 5.13E-15 | -2.63127 | 1 | 1 VENTX    | K17985 |
| ENSG00000151692 | 5.13E-15 | -2.63127 | 1 | 1 RNF144A  | K11975 |
| ENSG00000151702 | 5.13E-15 | -2.63127 | 1 | 1 FLII     | K09436 |
| ENSG00000151704 | 5.13E-15 | -2.63127 | 1 | 1 KCNJ1    | K04995 |
| ENSG00000151778 | 5.13E-15 | -2.63127 | 1 | 1 SERP2    | -      |
| ENSG00000151789 | 5.13E-15 | -2.63127 | 1 | 1 ZNF385D  | -      |
| ENSG00000151790 | 5.13E-15 | -2.63127 | 1 | 1 TDO2     | K00453 |
| ENSG00000151812 | 5.13E-15 | -2.63127 | 1 | 1 SLC35F4  | K15288 |
| ENSG00000151834 | 5.13E-15 | -2.63127 | 1 | 1 GABRA2   | K05175 |
| ENSG00000151838 | 5.13E-15 | -2.63127 | 1 | 1 CCDC175  | -      |
| ENSG00000151883 | 5.13E-15 | -2.63127 | 1 | 1 PARP8    | K15258 |
| ENSG00000151948 | 5.13E-15 | -2.63127 | 1 | 1 GLT1D1   | -      |
| ENSG00000151952 | 5.13E-15 | -2.63127 | 1 | 1 TMEM132D | K17599 |
| ENSG00000151962 | 5.13E-15 | -2.63127 | 1 | 1 RBM46    | -      |
| ENSG00000152034 | 5.13E-15 | -2.63127 | 1 | 1 MCHR2    | K05054 |
| ENSG00000152049 | 5.13E-15 | -2.63127 | 1 | 1 KCNE4    | K04898 |
| ENSG00000152092 | 5.13E-15 | -2.63127 | 1 | 1 ASTN1    | -      |
| ENSG00000152093 | 5.13E-15 | -2.63127 | 1 | 1 CFC1B    | -      |
| ENSG00000152192 | 5.13E-15 | -2.63127 | 1 | 1 POU4F1   | K09366 |
| ENSG00000152207 | 5.13E-15 | -2.63127 | 1 | 1 CYSLTR2  | K04323 |
| ENSG00000152208 | 5.13E-15 | -2.63127 | 1 | 1 GRID2    | K05207 |
| ENSG00000152213 | 5.13E-15 | -2.63127 | 1 | 1 ARL11    | K07959 |
| ENSG00000152214 | 5.13E-15 | -2.63127 | 1 | 1 RIT2     | K07833 |
| ENSG00000152254 | 5.13E-15 | -2.63127 | 1 | 1 G6PC2    | K01084 |
| ENSG00000152266 | 5.13E-15 | -2.63127 | 1 | 1 PTH      | K05261 |
| ENSG00000152268 | 5.13E-15 | -2.63127 | 1 | 1 SPON1    | -      |
| ENSG00000152315 | 5.13E-15 | -2.63127 | 1 | 1 KCNK13   | K04922 |
| ENSG00000152454 | 5.13E-15 | -2.63127 | 1 | 1 ZNF256   | K09228 |
| ENSG00000152463 | 5.13E-15 | -2.63127 | 1 | 1 OLAH     | K01071 |
| ENSG00000152467 | 5.13E-15 | -2.63127 | 1 | 1 ZSCAN1   | K09230 |
| ENSG00000152583 | 5.13E-15 | -2.63127 | 1 | 1 SPARCL1  | -      |
| ENSG00000152591 | 5.13E-15 | -2.63127 | 1 | 1 DSPP     | -      |
| ENSG00000152592 | 5.13E-15 | -2.63127 | 1 | 1 DMP1     | -      |
| ENSG00000152595 | 5.13E-15 | -2.63127 | 1 | 1 MEPE     | -      |
| ENSG00000152670 | 5.13E-15 | -2.63127 | 1 | 1 DDX4     | K13982 |
| ENSG00000152672 | 5.13E-15 | -2.63127 | 1 | 1 CLEC4F   | K10060 |
| ENSG00000152779 | 5.13E-15 | -2.63127 | 1 | 1 SLC16A12 | K11810 |
| ENSG00000152784 | 5.13E-15 | -2.63127 | 1 | 1 PRDM8    | -      |
| ENSG00000152785 | 5.13E-15 | -2.63127 | 1 | 1 BMP3     | K05496 |
| ENSG00000152910 | 5.13E-15 | -2.63127 | 1 | 1 CNTNAP4  | -      |
| ENSG00000152931 | 5.13E-15 | -2.63127 | 1 | 1 PART1    | -      |
| ENSG00000152953 | 5.13E-15 | -2.63127 | 1 | 1 STK32B   | K08793 |
| ENSG00000152954 | 5.13E-15 | -2.63127 | 1 | 1 NRSN1    | -      |
| ENSG00000152969 | 5.13E-15 | -2.63127 | 1 | 1 JAKMIP1  | -      |
| ENSG00000153002 | 5.13E-15 | -2.63127 | 1 | 1 CPB1     | K01291 |
| ENSG00000153012 | 5.13E-15 | -2.63127 | 1 | 1 LGI2     | -      |
| ENSG00000153130 | 5.13E-15 | -2.63127 | 1 | 1 SCOC     | -      |
| ENSG00000153132 | 5.13E-15 | -2.63127 | 1 | 1 CLGN     | K09551 |

|                 |          |          |   |            |               |
|-----------------|----------|----------|---|------------|---------------|
| ENSG00000153157 | 5.13E-15 | -2.63127 | 1 | 1 SYCP2L   | -             |
| ENSG00000153230 | 5.13E-15 | -2.63127 | 1 | 1 OR14K1   | K04257        |
| ENSG00000153246 | 5.13E-15 | -2.63127 | 1 | 1 PLA2R1   | K06560        |
| ENSG00000153266 | 5.13E-15 | -2.63127 | 1 | 1 FEZF2    | -             |
| ENSG00000153283 | 5.13E-15 | -2.63127 | 1 | 1 CD96     | K06517        |
| ENSG00000153292 | 5.13E-15 | -2.63127 | 1 | 1 GPR110   | K08453        |
| ENSG00000153303 | 5.13E-15 | -2.63127 | 1 | 1 FRMD1    | K16821        |
| ENSG00000153347 | 5.13E-15 | -2.63127 | 1 | 1 FAM81B   | -             |
| ENSG00000153404 | 5.13E-15 | -2.63127 | 1 | 1 PLEKHG4B | -             |
| ENSG00000153498 | 5.13E-15 | -2.63127 | 1 | 1 SPACA7   | -             |
| ENSG00000153551 | 5.13E-15 | -2.63127 | 1 | 1 CMTM7    | -             |
| ENSG00000153563 | 5.13E-15 | -2.63127 | 1 | 1 CD8A     | K06458        |
| ENSG00000153666 | 5.13E-15 | -2.63127 | 1 | 1 GOLGA8I  | K10595        |
| ENSG00000153684 | 5.13E-15 | -2.63127 | 1 | 1 GOLGA8F  | -             |
| ENSG00000153707 | 5.13E-15 | -2.63127 | 1 | 1 PTPRD    | K06777        |
| ENSG00000153779 | 5.13E-15 | -2.63127 | 1 | 1 TGIF2LX  | K19554        |
| ENSG00000153789 | 5.13E-15 | -2.63127 | 1 | 1 FAM92B   | -             |
| ENSG00000153820 | 5.13E-15 | -2.63127 | 1 | 1 SPHKAP   | -             |
| ENSG00000153822 | 5.13E-15 | -2.63127 | 1 | 1 KCNJ16   | K12581        |
| ENSG00000153898 | 5.13E-15 | -2.63127 | 1 | 1 MCOLN2   | K04993        |
| ENSG00000153923 | 5.13E-15 | -2.63127 | 1 | 1 CLCA3P   | K05030        |
| ENSG00000153956 | 5.13E-15 | -2.63127 | 1 | 1 CACNA2D1 | K04858        |
| ENSG00000154007 | 5.13E-15 | -2.63127 | 1 | 1 ASB17    | K10339        |
| ENSG00000154027 | 5.13E-15 | -2.63127 | 1 | 1 AK5      | K00939        |
| ENSG00000154080 | 5.13E-15 | -2.63127 | 1 | 1 CHST9    | K09673        |
| ENSG00000154143 | 5.13E-15 | -2.63127 | 1 | 1 PANX3    | K03443        |
| ENSG00000154162 | 5.13E-15 | -2.63127 | 1 | 1 CDH12    | K06804        |
| ENSG00000154165 | 5.13E-15 | -2.63127 | 1 | 1 GPR15    | K08403        |
| ENSG00000154198 | 5.13E-15 | -2.63127 | 1 | 1 CYP4Z2P  | K07429        |
| ENSG00000154227 | 5.13E-15 | -2.63127 | 1 | 1 CERS3    | K04710        |
| ENSG00000154258 | 5.13E-15 | -2.63127 | 1 | 1 ABCA9    | K05651        |
| ENSG00000154262 | 5.13E-15 | -2.63127 | 1 | 1 ABCA6    | K05649        |
| ENSG00000154269 | 5.13E-15 | -2.63127 | 1 | 1 ENPP3    | K01513        |
| ENSG00000154274 | 5.13E-15 | -2.63127 | 1 | 1 C4orf19  | -             |
| ENSG00000154316 | 5.13E-15 | -2.63127 | 1 | 1 TDH      | K15789        |
| ENSG00000154415 | 5.13E-15 | -2.63127 | 1 | 1 PPP1R3A  | K07189        |
| ENSG00000154478 | 5.13E-15 | -2.63127 | 1 | 1 GPR26    | K08411        |
| ENSG00000154529 | 5.13E-15 | -2.63127 | 1 | 1 CNTNAP3B | -             |
| ENSG00000154545 | 5.13E-15 | -2.63127 | 1 | 1 MAGED4   | -             |
| ENSG00000154548 | 5.13E-15 | -2.63127 | 1 | 1 SRSF12   | K12900        |
| ENSG00000154553 | 5.13E-15 | -2.63127 | 1 | 1 PDLIM3   | -             |
| ENSG00000154611 | 5.13E-15 | -2.63127 | 1 | 1 PSMA8    | K02731        |
| ENSG00000154620 | 5.13E-15 | -2.63127 | 1 | 1 TMSB4Y   | K05764        |
| ENSG00000154655 | 5.13E-15 | -2.63127 | 1 | 1 L3MBTL4  | -             |
| ENSG00000154760 | 5.13E-15 | -2.63127 | 1 | 1 SLFN13   | K12581        |
| ENSG00000154764 | 5.13E-15 | -2.63127 | 1 | 1 WNT7A    | K00572        |
| ENSG00000154768 | 5.13E-15 | -2.63127 | 1 | 1 C17orf50 | -             |
| ENSG00000154783 | 5.13E-15 | -2.63127 | 1 | 1 FGD5     | K05724        |
| ENSG00000154856 | 5.13E-15 | -2.63127 | 1 | 1 APCDD1   | K17985        |
| ENSG00000154928 | 5.13E-15 | -2.63127 | 1 | 1 EPHB1    | -             |
| ENSG00000154930 | 5.13E-15 | -2.63127 | 1 | 1 ACSS1    | K01895        |
| ENSG00000154975 | 5.13E-15 | -2.63127 | 1 | 1 CA10     | -             |
| ENSG00000154997 | 5.13E-15 | -2.63127 | 1 | 1          | 14-Sep K16941 |
| ENSG00000155011 | 5.13E-15 | -2.63127 | 1 | 1 DKK2     | K02165        |
| ENSG00000155052 | 5.13E-15 | -2.63127 | 1 | 1 CNTNAP5  | -             |
| ENSG00000155070 | 5.13E-15 | -2.63127 | 1 | 1 UNC93B2  | K04257        |
| ENSG00000155087 | 5.13E-15 | -2.63127 | 1 | 1 ODF1     | -             |
| ENSG00000155093 | 5.13E-15 | -2.63127 | 1 | 1 PTPRN2   | K07817        |

|                 |          |          |   |                 |        |
|-----------------|----------|----------|---|-----------------|--------|
| ENSG00000155249 | 5.13E-15 | -2.63127 | 1 | 1 OR4K1         | K04257 |
| ENSG00000155282 | 5.13E-15 | -2.63127 | 1 | 1 RP11-195B21.3 | K17299 |
| ENSG00000155307 | 5.13E-15 | -2.63127 | 1 | 1 SAMSN1        | -      |
| ENSG00000155495 | 5.13E-15 | -2.63127 | 1 | 1 MAGEC1        | K03006 |
| ENSG00000155511 | 5.13E-15 | -2.63127 | 1 | 1 GRIA1         | K05197 |
| ENSG00000155622 | 5.13E-15 | -2.63127 | 1 | 1 XAGE2B        | -      |
| ENSG00000155629 | 5.13E-15 | -2.63127 | 1 | 1 PIK3AP1       | K12230 |
| ENSG00000155659 | 5.13E-15 | -2.63127 | 1 | 1 VSIG4         | -      |
| ENSG00000155714 | 5.13E-15 | -2.63127 | 1 | 1 PDZD9         | K05069 |
| ENSG00000155719 | 5.13E-15 | -2.63127 | 1 | 1 OTOA          | -      |
| ENSG00000155816 | 5.13E-15 | -2.63127 | 1 | 1 FMN2          | K02184 |
| ENSG00000155833 | 5.13E-15 | -2.63127 | 1 | 1 CYLC2         | K08834 |
| ENSG00000155849 | 5.13E-15 | -2.63127 | 1 | 1 ELMO1         | K12366 |
| ENSG00000155875 | 5.13E-15 | -2.63127 | 1 | 1 FAM154A       | -      |
| ENSG00000155886 | 5.13E-15 | -2.63127 | 1 | 1 SLC24A2       | K13750 |
| ENSG00000155890 | 5.13E-15 | -2.63127 | 1 | 1 TRIM42        | K12018 |
| ENSG00000155897 | 5.13E-15 | -2.63127 | 1 | 1 ADCY8         | K08048 |
| ENSG00000155961 | 5.13E-15 | -2.63127 | 1 | 1 RAB39B        | K07925 |
| ENSG00000155962 | 5.13E-15 | -2.63127 | 1 | 1 CLIC2         | K05022 |
| ENSG00000155966 | 5.13E-15 | -2.63127 | 1 | 1 AFF2          | K15194 |
| ENSG00000155970 | 5.13E-15 | -2.63127 | 1 | 1 MICU3         | -      |
| ENSG00000156006 | 5.13E-15 | -2.63127 | 1 | 1 NAT2          | K00622 |
| ENSG00000156009 | 5.13E-15 | -2.63127 | 1 | 1 MAGEA8        | -      |
| ENSG00000156076 | 5.13E-15 | -2.63127 | 1 | 1 WIF1          | K01691 |
| ENSG00000156096 | 5.13E-15 | -2.63127 | 1 | 1 UGT2B4        | K00699 |
| ENSG00000156103 | 5.13E-15 | -2.63127 | 1 | 1 MMP16         | K07996 |
| ENSG00000156113 | 5.13E-15 | -2.63127 | 1 | 1 KCNMA1        | K04936 |
| ENSG00000156127 | 5.13E-15 | -2.63127 | 1 | 1 BATF          | K09034 |
| ENSG00000156150 | 5.13E-15 | -2.63127 | 1 | 1 ALX3          | K09323 |
| ENSG00000156194 | 5.13E-15 | -2.63127 | 1 | 1 PPEF2         | K13807 |
| ENSG00000156206 | 5.13E-15 | -2.63127 | 1 | 1 C15orf26      | -      |
| ENSG00000156218 | 5.13E-15 | -2.63127 | 1 | 1 ADAMTSL3      | -      |
| ENSG00000156222 | 5.13E-15 | -2.63127 | 1 | 1 SLC28A1       | K11536 |
| ENSG00000156234 | 5.13E-15 | -2.63127 | 1 | 1 CXCL13        | K10032 |
| ENSG00000156269 | 5.13E-15 | -2.63127 | 1 | 1 NAA11         | K00670 |
| ENSG00000156282 | 5.13E-15 | -2.63127 | 1 | 1 CLDN17        | K06087 |
| ENSG00000156284 | 5.13E-15 | -2.63127 | 1 | 1 CLDN8         | K06087 |
| ENSG00000156298 | 5.13E-15 | -2.63127 | 1 | 1 TSPAN7        | K06571 |
| ENSG00000156395 | 5.13E-15 | -2.63127 | 1 | 1 SORCS3        | -      |
| ENSG00000156413 | 5.13E-15 | -2.63127 | 1 | 1 FUT6          | K07634 |
| ENSG00000156466 | 5.13E-15 | -2.63127 | 1 | 1 GDF6          | K04664 |
| ENSG00000156486 | 5.13E-15 | -2.63127 | 1 | 1 KCNS2         | K04932 |
| ENSG00000156564 | 5.13E-15 | -2.63127 | 1 | 1 LRFN2         | K16355 |
| ENSG00000156587 | 5.13E-15 | -2.63127 | 1 | 1 UBE2L6        | K04553 |
| ENSG00000156687 | 5.13E-15 | -2.63127 | 1 | 1 UNC5D         | K07521 |
| ENSG00000156738 | 5.13E-15 | -2.63127 | 1 | 1 MS4A1         | K06466 |
| ENSG00000156750 | 5.13E-15 | -2.63127 | 1 | 1 AQP7P3        | K08771 |
| ENSG00000156755 | 5.13E-15 | -2.63127 | 1 | 1 IGKV1OR-2     | -      |
| ENSG00000156885 | 5.13E-15 | -2.63127 | 1 | 1 COX6A2        | K02266 |
| ENSG00000156925 | 5.13E-15 | -2.63127 | 1 | 1 ZIC3          | K18487 |
| ENSG00000156959 | 5.13E-15 | -2.63127 | 1 | 1 LHFPL4        | -      |
| ENSG00000157021 | 5.13E-15 | -2.63127 | 1 | 1 FAM92A1P1     | -      |
| ENSG00000157060 | 5.13E-15 | -2.63127 | 1 | 1 SHCBP1L       | -      |
| ENSG00000157087 | 5.13E-15 | -2.63127 | 1 | 1 ATP2B2        | K05850 |
| ENSG00000157093 | 5.13E-15 | -2.63127 | 1 | 1 LYZL4         | -      |
| ENSG00000157103 | 5.13E-15 | -2.63127 | 1 | 1 SLC6A1        | K05034 |
| ENSG00000157111 | 5.13E-15 | -2.63127 | 1 | 1 TMEM171       | -      |
| ENSG00000157119 | 5.13E-15 | -2.63127 | 1 | 1 KLHL40        | K10473 |

|                 |          |          |   |               |        |
|-----------------|----------|----------|---|---------------|--------|
| ENSG00000157131 | 5.13E-15 | -2.63127 | 1 | 1 C8A         | K03997 |
| ENSG00000157214 | 5.13E-15 | -2.63127 | 1 | 1 STEAP2      | K14738 |
| ENSG00000157219 | 5.13E-15 | -2.63127 | 1 | 1 HTR5A       | K04161 |
| ENSG00000157322 | 5.13E-15 | -2.63127 | 1 | 1 CLEC18A     | -      |
| ENSG00000157330 | 5.13E-15 | -2.63127 | 1 | 1 Clorf158    | -      |
| ENSG00000157335 | 5.13E-15 | -2.63127 | 1 | 1 CLEC18C     | -      |
| ENSG00000157358 | 5.13E-15 | -2.63127 | 1 | 1 PRAMEF15    | -      |
| ENSG00000157399 | 5.13E-15 | -2.63127 | 1 | 1 ARSE        | K18222 |
| ENSG00000157404 | 5.13E-15 | -2.63127 | 1 | 1 KIT         | K05091 |
| ENSG00000157502 | 5.13E-15 | -2.63127 | 1 | 1 MUM1L1      | -      |
| ENSG00000157542 | 5.13E-15 | -2.63127 | 1 | 1 KCNJ6       | K05000 |
| ENSG00000157570 | 5.13E-15 | -2.63127 | 1 | 1 TSPAN18     | K17353 |
| ENSG00000157601 | 5.13E-15 | -2.63127 | 1 | 1 MX1         | K14754 |
| ENSG00000157654 | 5.13E-15 | -2.63127 | 1 | 1 PALM2-AKAP2 | K16519 |
| ENSG00000157765 | 5.13E-15 | -2.63127 | 1 | 1 SLC34A2     | K14683 |
| ENSG00000157766 | 5.13E-15 | -2.63127 | 1 | 1 ACAN        | K06792 |
| ENSG00000157828 | 5.13E-15 | -2.63127 | 1 | 1 RPS4Y2      | K02987 |
| ENSG00000157884 | 5.13E-15 | -2.63127 | 1 | 1 CIB4        | -      |
| ENSG00000157965 | 5.13E-15 | -2.63127 | 1 | 1 SSX8        | K15624 |
| ENSG00000158014 | 5.13E-15 | -2.63127 | 1 | 1 SLC30A2     | K14689 |
| ENSG00000158022 | 5.13E-15 | -2.63127 | 1 | 1 TRIM63      | K10655 |
| ENSG00000158089 | 5.13E-15 | -2.63127 | 1 | 1 GALNT14     | K00710 |
| ENSG00000158164 | 5.13E-15 | -2.63127 | 1 | 1 TMSB15A     | K11252 |
| ENSG00000158270 | 5.13E-15 | -2.63127 | 1 | 1 COLEC12     | K10062 |
| ENSG00000158296 | 5.13E-15 | -2.63127 | 1 | 1 SLC13A3     | K14445 |
| ENSG00000158301 | 5.13E-15 | -2.63127 | 1 | 1 GPRASP2     | -      |
| ENSG00000158352 | 5.13E-15 | -2.63127 | 1 | 1 SHROOM4     | K18625 |
| ENSG00000158427 | 5.13E-15 | -2.63127 | 1 | 1 TMSB15B     | K11252 |
| ENSG00000158473 | 5.13E-15 | -2.63127 | 1 | 1 CD1D        | K06448 |
| ENSG00000158477 | 5.13E-15 | -2.63127 | 1 | 1 CD1A        | K06448 |
| ENSG00000158481 | 5.13E-15 | -2.63127 | 1 | 1 CD1C        | K06448 |
| ENSG00000158482 | 5.13E-15 | -2.63127 | 1 | 1 SNX29P1     | K17935 |
| ENSG00000158485 | 5.13E-15 | -2.63127 | 1 | 1 CD1B        | K06448 |
| ENSG00000158488 | 5.13E-15 | -2.63127 | 1 | 1 CD1E        | K06448 |
| ENSG00000158497 | 5.13E-15 | -2.63127 | 1 | 1 HMHB1       | -      |
| ENSG00000158517 | 5.13E-15 | -2.63127 | 1 | 1 NCF1        | K08011 |
| ENSG00000158553 | 5.13E-15 | -2.63127 | 1 | 1 POM121L2    | K14316 |
| ENSG00000158571 | 5.13E-15 | -2.63127 | 1 | 1 PFKFB1      | K19028 |
| ENSG00000158578 | 5.13E-15 | -2.63127 | 1 | 1 ALAS2       | K00643 |
| ENSG00000158639 | 5.13E-15 | -2.63127 | 1 | 1 PAGE5       | K11299 |
| ENSG00000158731 | 5.13E-15 | -2.63127 | 1 | 1 OR10J6P     | K04257 |
| ENSG00000158748 | 5.13E-15 | -2.63127 | 1 | 1 HTR6        | K04162 |
| ENSG00000158764 | 5.13E-15 | -2.63127 | 1 | 1 ITLN2       | K17527 |
| ENSG00000158786 | 5.13E-15 | -2.63127 | 1 | 1 PLA2G2F     | K01047 |
| ENSG00000158816 | 5.13E-15 | -2.63127 | 1 | 1 VWA5B1      | -      |
| ENSG00000158874 | 5.13E-15 | -2.63127 | 1 | 1 APOA2       | K08758 |
| ENSG00000158887 | 5.13E-15 | -2.63127 | 1 | 1 MPZ         | K06770 |
| ENSG00000158901 | 5.13E-15 | -2.63127 | 1 | 1 WFDC8       | -      |
| ENSG00000158955 | 5.13E-15 | -2.63127 | 1 | 1 WNT9B       | K01064 |
| ENSG00000158966 | 5.13E-15 | -2.63127 | 1 | 1 CACHD1      | -      |
| ENSG00000159123 | 5.13E-15 | -2.63127 | 1 | 1 DMRTC1      | K19494 |
| ENSG00000159164 | 5.13E-15 | -2.63127 | 1 | 1 SV2A        | K06258 |
| ENSG00000159173 | 5.13E-15 | -2.63127 | 1 | 1 TNNI1       | K10371 |
| ENSG00000159182 | 5.13E-15 | -2.63127 | 1 | 1 PRAC1       | -      |
| ENSG00000159186 | 5.13E-15 | -2.63127 | 1 | 1 AC007383.6  | K02137 |
| ENSG00000159189 | 5.13E-15 | -2.63127 | 1 | 1 C1QC        | K03988 |
| ENSG00000159247 | 5.13E-15 | -2.63127 | 1 | 1 TUBBP5      | K07375 |
| ENSG00000159248 | 5.13E-15 | -2.63127 | 1 | 1 GJD2        | K07373 |

|                 |          |          |   |               |        |
|-----------------|----------|----------|---|---------------|--------|
| ENSG00000159289 | 5.13E-15 | -2.63127 | 1 | 1 GOLGA6A     | -      |
| ENSG00000159387 | 5.13E-15 | -2.63127 | 1 | 1 IRX6        | -      |
| ENSG00000159398 | 5.13E-15 | -2.63127 | 1 | 1 CES5A       | K15743 |
| ENSG00000159409 | 5.13E-15 | -2.63127 | 1 | 1 CELF3       | K13207 |
| ENSG00000159450 | 5.13E-15 | -2.63127 | 1 | 1 TCHH        | K18626 |
| ENSG00000159455 | 5.13E-15 | -2.63127 | 1 | 1 LCE2B       | -      |
| ENSG00000159495 | 5.13E-15 | -2.63127 | 1 | 1 TGM7        | K05623 |
| ENSG00000159516 | 5.13E-15 | -2.63127 | 1 | 1 SPRR2G      | -      |
| ENSG00000159527 | 5.13E-15 | -2.63127 | 1 | 1 PGLYRP3     | K01446 |
| ENSG00000159640 | 5.13E-15 | -2.63127 | 1 | 1 ACE         | K01283 |
| ENSG00000159648 | 5.13E-15 | -2.63127 | 1 | 1 TEPP        | K02927 |
| ENSG00000159650 | 5.13E-15 | -2.63127 | 1 | 1 UROC1       | K01712 |
| ENSG00000159723 | 5.13E-15 | -2.63127 | 1 | 1 AGRP        | K05231 |
| ENSG00000159763 | 5.13E-15 | -2.63127 | 1 | 1 PIP         | -      |
| ENSG00000159961 | 5.13E-15 | -2.63127 | 1 | 1 OR3A3       | K04257 |
| ENSG00000160013 | 5.13E-15 | -2.63127 | 1 | 1 PTGIR       | K04263 |
| ENSG00000160180 | 5.13E-15 | -2.63127 | 1 | 1 TFF3        | -      |
| ENSG00000160202 | 5.13E-15 | -2.63127 | 1 | 1 CRYAA       | K09541 |
| ENSG00000160219 | 5.13E-15 | -2.63127 | 1 | 1 GAB3        | -      |
| ENSG00000160229 | 5.13E-15 | -2.63127 | 1 | 1 ZNF66       | K09228 |
| ENSG00000160307 | 5.13E-15 | -2.63127 | 1 | 1 S100B       | -      |
| ENSG00000160325 | 5.13E-15 | -2.63127 | 1 | 1 CACFD1      | -      |
| ENSG00000160326 | 5.13E-15 | -2.63127 | 1 | 1 SLC2A6      | K08144 |
| ENSG00000160349 | 5.13E-15 | -2.63127 | 1 | 1 LCN1        | -      |
| ENSG00000160439 | 5.13E-15 | -2.63127 | 1 | 1 RDH13       | K11161 |
| ENSG00000160505 | 5.13E-15 | -2.63127 | 1 | 1 NLRP4       | -      |
| ENSG00000160593 | 5.13E-15 | -2.63127 | 1 | 1 AMICA1      | -      |
| ENSG00000160654 | 5.13E-15 | -2.63127 | 1 | 1 CD3G        | K06452 |
| ENSG00000160683 | 5.13E-15 | -2.63127 | 1 | 1 CXCR5       | K04190 |
| ENSG00000160695 | 5.13E-15 | -2.63127 | 1 | 1 VPS11       | -      |
| ENSG00000160791 | 5.13E-15 | -2.63127 | 1 | 1 CCR5        | K04180 |
| ENSG00000160808 | 5.13E-15 | -2.63127 | 1 | 1 MYL3        | K12749 |
| ENSG00000160844 | 5.13E-15 | -2.63127 | 1 | 1 GATS        | K13055 |
| ENSG00000160856 | 5.13E-15 | -2.63127 | 1 | 1 FCRL3       | K06727 |
| ENSG00000160882 | 5.13E-15 | -2.63127 | 1 | 1 CYP11B1     | K00497 |
| ENSG00000160883 | 5.13E-15 | -2.63127 | 1 | 1 HK3         | K00844 |
| ENSG00000160994 | 5.13E-15 | -2.63127 | 1 | 1 CCDC105     | -      |
| ENSG00000161031 | 5.13E-15 | -2.63127 | 1 | 1 PGLYRP2     | K01446 |
| ENSG00000161055 | 5.13E-15 | -2.63127 | 1 | 1 SCGB3A1     | -      |
| ENSG00000161405 | 5.13E-15 | -2.63127 | 1 | 1 IKZF3       | K09220 |
| ENSG00000161551 | 5.13E-15 | -2.63127 | 1 | 1 ZNF577      | K09228 |
| ENSG00000161572 | 5.13E-15 | -2.63127 | 1 | 1 LYZL6       | K01185 |
| ENSG00000161573 | 5.13E-15 | -2.63127 | 1 | 1 CCL16       | K05514 |
| ENSG00000161574 | 5.13E-15 | -2.63127 | 1 | 1 CCL15-CCL14 | K05511 |
| ENSG00000161583 | 5.13E-15 | -2.63127 | 1 | 1 TBC1D3G     | K11837 |
| ENSG00000161594 | 5.13E-15 | -2.63127 | 1 | 1 KLHL10      | K10448 |
| ENSG00000161609 | 5.13E-15 | -2.63127 | 1 | 1 CCDC155     | -      |
| ENSG00000161634 | 5.13E-15 | -2.63127 | 1 | 1 DCD         | -      |
| ENSG00000161640 | 5.13E-15 | -2.63127 | 1 | 1 SIGLEC11    | K06750 |
| ENSG00000161649 | 5.13E-15 | -2.63127 | 1 | 1 CD300LG     | K16663 |
| ENSG00000161652 | 5.13E-15 | -2.63127 | 1 | 1 IZUMO2      | -      |
| ENSG00000161681 | 5.13E-15 | -2.63127 | 1 | 1 SHANK1      | K15009 |
| ENSG00000161807 | 5.13E-15 | -2.63127 | 1 | 1 OR7G1       | K04257 |
| ENSG00000161849 | 5.13E-15 | -2.63127 | 1 | 1 KRT84       | K07605 |
| ENSG00000161850 | 5.13E-15 | -2.63127 | 1 | 1 KRT82       | K07605 |
| ENSG00000161905 | 5.13E-15 | -2.63127 | 1 | 1 ALOX15      | K00460 |
| ENSG00000161911 | 5.13E-15 | -2.63127 | 1 | 1 TREML1      | K14363 |
| ENSG00000161944 | 5.13E-15 | -2.63127 | 1 | 1 ASGR2       | K10064 |

|                 |          |          |   |              |        |
|-----------------|----------|----------|---|--------------|--------|
| ENSG00000161973 | 5.13E-15 | -2.63127 | 1 | 1 CCDC42     | -      |
| ENSG00000161992 | 5.13E-15 | -2.63127 | 1 | 1 C16orf11   | -      |
| ENSG00000162040 | 5.13E-15 | -2.63127 | 1 | 1 HS3ST6     | K09679 |
| ENSG00000162105 | 5.13E-15 | -2.63127 | 1 | 1 SHANK2     | K15009 |
| ENSG00000162344 | 5.13E-15 | -2.63127 | 1 | 1 FGF19      | K04358 |
| ENSG00000162365 | 5.13E-15 | -2.63127 | 1 | 1 CYP4A22    | K17688 |
| ENSG00000162367 | 5.13E-15 | -2.63127 | 1 | 1 TAL1       | K09068 |
| ENSG00000162373 | 5.13E-15 | -2.63127 | 1 | 1 BEND5      | -      |
| ENSG00000162374 | 5.13E-15 | -2.63127 | 1 | 1 ELAVL4     | K13208 |
| ENSG00000162383 | 5.13E-15 | -2.63127 | 1 | 1 SLC1A7     | K05618 |
| ENSG00000162444 | 5.13E-15 | -2.63127 | 1 | 1 RBP7       | K10597 |
| ENSG00000162456 | 5.13E-15 | -2.63127 | 1 | 1 KNCN       | -      |
| ENSG00000162493 | 5.13E-15 | -2.63127 | 1 | 1 PDPN       | K16778 |
| ENSG00000162494 | 5.13E-15 | -2.63127 | 1 | 1 LRRC38     | -      |
| ENSG00000162543 | 5.13E-15 | -2.63127 | 1 | 1 UBXN10     | -      |
| ENSG00000162571 | 5.13E-15 | -2.63127 | 1 | 1 TTLL10     | -      |
| ENSG00000162594 | 5.13E-15 | -2.63127 | 1 | 1 IL23R      | K05065 |
| ENSG00000162598 | 5.13E-15 | -2.63127 | 1 | 1 C1orf87    | -      |
| ENSG00000162621 | 5.13E-15 | -2.63127 | 1 | 1 LRRC53     | -      |
| ENSG00000162624 | 5.13E-15 | -2.63127 | 1 | 1 LHX8       | K09375 |
| ENSG00000162631 | 5.13E-15 | -2.63127 | 1 | 1 NTNG1      | K07522 |
| ENSG00000162643 | 5.13E-15 | -2.63127 | 1 | 1 WDR63      | -      |
| ENSG00000162669 | 5.13E-15 | -2.63127 | 1 | 1 HFM1       | K15271 |
| ENSG00000162685 | 5.13E-15 | -2.63127 | 1 | 1 LSP1P3     | K17608 |
| ENSG00000162692 | 5.13E-15 | -2.63127 | 1 | 1 VCAM1      | K06527 |
| ENSG00000162699 | 5.13E-15 | -2.63127 | 1 | 1 DNAJA1P5   | K09502 |
| ENSG00000162706 | 5.13E-15 | -2.63127 | 1 | 1 CADM3      | K06780 |
| ENSG00000162711 | 5.13E-15 | -2.63127 | 1 | 1 NLRP3      | K12800 |
| ENSG00000162722 | 5.13E-15 | -2.63127 | 1 | 1 TRIM58     | K12027 |
| ENSG00000162723 | 5.13E-15 | -2.63127 | 1 | 1 SLAMF9     | -      |
| ENSG00000162727 | 5.13E-15 | -2.63127 | 1 | 1 OR2M5      | K04257 |
| ENSG00000162738 | 5.13E-15 | -2.63127 | 1 | 1 VANGL2     | K04510 |
| ENSG00000162739 | 5.13E-15 | -2.63127 | 1 | 1 SLAMF6     | K16852 |
| ENSG00000162747 | 5.13E-15 | -2.63127 | 1 | 1 FCGR3B     | K06463 |
| ENSG00000162755 | 5.13E-15 | -2.63127 | 1 | 1 KLHDC9     | -      |
| ENSG00000162761 | 5.13E-15 | -2.63127 | 1 | 1 LMX1A      | K09371 |
| ENSG00000162763 | 5.13E-15 | -2.63127 | 1 | 1 LRRC52     | -      |
| ENSG00000162779 | 5.13E-15 | -2.63127 | 1 | 1 AXDND1     | -      |
| ENSG00000162782 | 5.13E-15 | -2.63127 | 1 | 1 TDRD5      | K18407 |
| ENSG00000162817 | 5.13E-15 | -2.63127 | 1 | 1 C1orf115   | -      |
| ENSG00000162840 | 5.13E-15 | -2.63127 | 1 | 1 MT2P1      | K14739 |
| ENSG00000162849 | 5.13E-15 | -2.63127 | 1 | 1 KIF26B     | K10404 |
| ENSG00000162877 | 5.13E-15 | -2.63127 | 1 | 1 PM20D1     | K13049 |
| ENSG00000162881 | 5.13E-15 | -2.63127 | 1 | 1 OXER1      | K10043 |
| ENSG00000162896 | 5.13E-15 | -2.63127 | 1 | 1 PIGR       | K13073 |
| ENSG00000162947 | 5.13E-15 | -2.63127 | 1 | 1 AC007364.1 | -      |
| ENSG00000162949 | 5.13E-15 | -2.63127 | 1 | 1 CAPN13     | K08581 |
| ENSG00000162951 | 5.13E-15 | -2.63127 | 1 | 1 LRRTM1     | K16665 |
| ENSG00000162975 | 5.13E-15 | -2.63127 | 1 | 1 KCNF1      | K04899 |
| ENSG00000162981 | 5.13E-15 | -2.63127 | 1 | 1 FAM84A     | -      |
| ENSG00000162989 | 5.13E-15 | -2.63127 | 1 | 1 KCNJ3      | K04997 |
| ENSG00000162992 | 5.13E-15 | -2.63127 | 1 | 1 NEUROD1    | K08033 |
| ENSG00000163012 | 5.13E-15 | -2.63127 | 1 | 1 ZSWIM2     | K15716 |
| ENSG00000163016 | 5.13E-15 | -2.63127 | 1 | 1 ALMS1P     | K16741 |
| ENSG00000163032 | 5.13E-15 | -2.63127 | 1 | 1 VSNL1      | -      |
| ENSG00000163040 | 5.13E-15 | -2.63127 | 1 | 1 CCDC74A    | -      |
| ENSG00000163046 | 5.13E-15 | -2.63127 | 1 | 1 ANKRD30BL  | K17299 |
| ENSG00000163060 | 5.13E-15 | -2.63127 | 1 | 1 TEK4       | K18631 |



|                 |          |          |   |             |        |
|-----------------|----------|----------|---|-------------|--------|
| ENSG00000163064 | 5.13E-15 | -2.63127 | 1 | 1 EN1       | -      |
| ENSG00000163069 | 5.13E-15 | -2.63127 | 1 | 1 SGCB      | K12566 |
| ENSG00000163071 | 5.13E-15 | -2.63127 | 1 | 1 SPATA18   | -      |
| ENSG00000163075 | 5.13E-15 | -2.63127 | 1 | 1 PCDP1     | -      |
| ENSG00000163081 | 5.13E-15 | -2.63127 | 1 | 1 CCDC140   | -      |
| ENSG00000163092 | 5.13E-15 | -2.63127 | 1 | 1 XIRP2     | -      |
| ENSG00000163093 | 5.13E-15 | -2.63127 | 1 | 1 BBS5      | K16748 |
| ENSG00000163098 | 5.13E-15 | -2.63127 | 1 | 1 BIRC8     | K04725 |
| ENSG00000163114 | 5.13E-15 | -2.63127 | 1 | 1 PDHA2     | K00161 |
| ENSG00000163116 | 5.13E-15 | -2.63127 | 1 | 1 STPG2     | -      |
| ENSG00000163145 | 5.13E-15 | -2.63127 | 1 | 1 C1QTNF7   | -      |
| ENSG00000163157 | 5.13E-15 | -2.63127 | 1 | 1 TMOD4     | K10370 |
| ENSG00000163202 | 5.13E-15 | -2.63127 | 1 | 1 LCE3D     | -      |
| ENSG00000163206 | 5.13E-15 | -2.63127 | 1 | 1 SMCP      | -      |
| ENSG00000163207 | 5.13E-15 | -2.63127 | 1 | 1 IVL       | -      |
| ENSG00000163209 | 5.13E-15 | -2.63127 | 1 | 1 SPRR3     | -      |
| ENSG00000163217 | 5.13E-15 | -2.63127 | 1 | 1 BMP10     | K05503 |
| ENSG00000163218 | 5.13E-15 | -2.63127 | 1 | 1 PGLYRP4   | K01446 |
| ENSG00000163219 | 5.13E-15 | -2.63127 | 1 | 1 ARHGAP25  | -      |
| ENSG00000163235 | 5.13E-15 | -2.63127 | 1 | 1 TGFA      | K08774 |
| ENSG00000163254 | 5.13E-15 | -2.63127 | 1 | 1 CRYGC     | -      |
| ENSG00000163273 | 5.13E-15 | -2.63127 | 1 | 1 NPPC      | K12336 |
| ENSG00000163285 | 5.13E-15 | -2.63127 | 1 | 1 GABRG1    | K05186 |
| ENSG00000163288 | 5.13E-15 | -2.63127 | 1 | 1 GABRB1    | K05181 |
| ENSG00000163331 | 5.13E-15 | -2.63127 | 1 | 1 DAPL1     | -      |
| ENSG00000163364 | 5.13E-15 | -2.63127 | 1 | 1 LINC01116 | -      |
| ENSG00000163377 | 5.13E-15 | -2.63127 | 1 | 1 FAM19A4   | -      |
| ENSG00000163394 | 5.13E-15 | -2.63127 | 1 | 1 CCKAR     | K04194 |
| ENSG00000163421 | 5.13E-15 | -2.63127 | 1 | 1 PROK2     | -      |
| ENSG00000163424 | 5.13E-15 | -2.63127 | 1 | 1 C3orf30   | -      |
| ENSG00000163440 | 5.13E-15 | -2.63127 | 1 | 1 PDCL2     | -      |
| ENSG00000163464 | 5.13E-15 | -2.63127 | 1 | 1 CXCR1     | K04175 |
| ENSG00000163492 | 5.13E-15 | -2.63127 | 1 | 1 CCDC141   | -      |
| ENSG00000163499 | 5.13E-15 | -2.63127 | 1 | 1 CRYBA2    | -      |
| ENSG00000163501 | 5.13E-15 | -2.63127 | 1 | 1 IHH       | K11989 |
| ENSG00000163515 | 5.13E-15 | -2.63127 | 1 | 1 RETNLB    | -      |
| ENSG00000163518 | 5.13E-15 | -2.63127 | 1 | 1 FCRL4     | -      |
| ENSG00000163519 | 5.13E-15 | -2.63127 | 1 | 1 TRAT1     | -      |
| ENSG00000163534 | 5.13E-15 | -2.63127 | 1 | 1 FCRL1     | K06727 |
| ENSG00000163554 | 5.13E-15 | -2.63127 | 1 | 1 SPTA1     | K06114 |
| ENSG00000163563 | 5.13E-15 | -2.63127 | 1 | 1 MNDA      | -      |
| ENSG00000163564 | 5.13E-15 | -2.63127 | 1 | 1 PYHIN1    | -      |
| ENSG00000163581 | 5.13E-15 | -2.63127 | 1 | 1 SLC2A2    | K07593 |
| ENSG00000163586 | 5.13E-15 | -2.63127 | 1 | 1 FABP1     | K08750 |
| ENSG00000163599 | 5.13E-15 | -2.63127 | 1 | 1 CTLA4     | K06538 |
| ENSG00000163600 | 5.13E-15 | -2.63127 | 1 | 1 ICOS      | K06713 |
| ENSG00000163606 | 5.13E-15 | -2.63127 | 1 | 1 CD200R1   | -      |
| ENSG00000163612 | 5.13E-15 | -2.63127 | 1 | 1 FAM86KP   | K12354 |
| ENSG00000163623 | 5.13E-15 | -2.63127 | 1 | 1 NKX6-1    | K08030 |
| ENSG00000163624 | 5.13E-15 | -2.63127 | 1 | 1 CDS1      | K00981 |
| ENSG00000163629 | 5.13E-15 | -2.63127 | 1 | 1 PTPN13    | K02374 |
| ENSG00000163630 | 5.13E-15 | -2.63127 | 1 | 1 SYNPR     | -      |
| ENSG00000163631 | 5.13E-15 | -2.63127 | 1 | 1 ALB       | K16141 |
| ENSG00000163638 | 5.13E-15 | -2.63127 | 1 | 1 ADAMTS9   | K08624 |
| ENSG00000163645 | 5.13E-15 | -2.63127 | 1 | 1 FAM194A   | -      |
| ENSG00000163646 | 5.13E-15 | -2.63127 | 1 | 1 CLRN1     | -      |
| ENSG00000163661 | 5.13E-15 | -2.63127 | 1 | 1 PTX3      | -      |
| ENSG00000163673 | 5.13E-15 | -2.63127 | 1 | 1 DCLK3     | K17530 |

|                 |          |          |   |            |        |
|-----------------|----------|----------|---|------------|--------|
| ENSG00000163705 | 5.13E-15 | -2.63127 | 1 | 1 FANCD2OS | K10891 |
| ENSG00000163735 | 5.13E-15 | -2.63127 | 1 | 1 CXCL5    | K05506 |
| ENSG00000163736 | 5.13E-15 | -2.63127 | 1 | 1 PPBP     | K10029 |
| ENSG00000163737 | 5.13E-15 | -2.63127 | 1 | 1 PF4      | K05407 |
| ENSG00000163739 | 5.13E-15 | -2.63127 | 1 | 1 CXCL1    | K05505 |
| ENSG00000163746 | 5.13E-15 | -2.63127 | 1 | 1 PLSCR2   | -      |
| ENSG00000163751 | 5.13E-15 | -2.63127 | 1 | 1 CPA3     | K08780 |
| ENSG00000163792 | 5.13E-15 | -2.63127 | 1 | 1 TCF23    | -      |
| ENSG00000163793 | 5.13E-15 | -2.63127 | 1 | 1 DNAJC5G  | K09525 |
| ENSG00000163825 | 5.13E-15 | -2.63127 | 1 | 1 RTP3     | -      |
| ENSG00000163827 | 5.13E-15 | -2.63127 | 1 | 1 LRRC2    | K17985 |
| ENSG00000163833 | 5.13E-15 | -2.63127 | 1 | 1 FBXO40   | K10315 |
| ENSG00000163864 | 5.13E-15 | -2.63127 | 1 | 1 NMNAT3   | K06210 |
| ENSG00000163873 | 5.13E-15 | -2.63127 | 1 | 1 GRIK3    | K05203 |
| ENSG00000163885 | 5.13E-15 | -2.63127 | 1 | 1 CCDC37   | -      |
| ENSG00000163909 | 5.13E-15 | -2.63127 | 1 | 1 HEYL     | K09091 |
| ENSG00000163914 | 5.13E-15 | -2.63127 | 1 | 1 RHO      | K04250 |
| ENSG00000163958 | 5.13E-15 | -2.63127 | 1 | 1 ZDHHC19  | K18932 |
| ENSG00000163982 | 5.13E-15 | -2.63127 | 1 | 1 OTOPI    | -      |
| ENSG00000164002 | 5.13E-15 | -2.63127 | 1 | 1 EXO5     | K17815 |
| ENSG00000164035 | 5.13E-15 | -2.63127 | 1 | 1 EMCN     | K16664 |
| ENSG00000164047 | 5.13E-15 | -2.63127 | 1 | 1 CAMP     | K13916 |
| ENSG00000164082 | 5.13E-15 | -2.63127 | 1 | 1 GRM2     | K04605 |
| ENSG00000164093 | 5.13E-15 | -2.63127 | 1 | 1 PITX2    | K04686 |
| ENSG00000164100 | 5.13E-15 | -2.63127 | 1 | 1 NDST3    | K02578 |
| ENSG00000164106 | 5.13E-15 | -2.63127 | 1 | 1 SCRG1    | -      |
| ENSG00000164107 | 5.13E-15 | -2.63127 | 1 | 1 HAND2    | K18486 |
| ENSG00000164112 | 5.13E-15 | -2.63127 | 1 | 1 TMEM155  | -      |
| ENSG00000164113 | 5.13E-15 | -2.63127 | 1 | 1 ADAD1    | -      |
| ENSG00000164114 | 5.13E-15 | -2.63127 | 1 | 1 MAP9     | K10434 |
| ENSG00000164116 | 5.13E-15 | -2.63127 | 1 | 1 GUCY1A3  | K12318 |
| ENSG00000164120 | 5.13E-15 | -2.63127 | 1 | 1 HPGD     | K00069 |
| ENSG00000164123 | 5.13E-15 | -2.63127 | 1 | 1 C4orf45  | -      |
| ENSG00000164124 | 5.13E-15 | -2.63127 | 1 | 1 TMEM144  | K09488 |
| ENSG00000164125 | 5.13E-15 | -2.63127 | 1 | 1 FAM198B  | -      |
| ENSG00000164128 | 5.13E-15 | -2.63127 | 1 | 1 NPY1R    | K04204 |
| ENSG00000164129 | 5.13E-15 | -2.63127 | 1 | 1 NPY5R    | K04207 |
| ENSG00000164161 | 5.13E-15 | -2.63127 | 1 | 1 HHIP     | K06231 |
| ENSG00000164197 | 5.13E-15 | -2.63127 | 1 | 1 RNF180   | K15708 |
| ENSG00000164220 | 5.13E-15 | -2.63127 | 1 | 1 F2RL2    | K04235 |
| ENSG00000164241 | 5.13E-15 | -2.63127 | 1 | 1 C5orf63  | -      |
| ENSG00000164256 | 5.13E-15 | -2.63127 | 1 | 1 PRDM9    | K09228 |
| ENSG00000164270 | 5.13E-15 | -2.63127 | 1 | 1 HTR4     | K04160 |
| ENSG00000164283 | 5.13E-15 | -2.63127 | 1 | 1 ESM1     | -      |
| ENSG00000164287 | 5.13E-15 | -2.63127 | 1 | 1 CDC20B   | -      |
| ENSG00000164299 | 5.13E-15 | -2.63127 | 1 | 1 SPZ1     | K17482 |
| ENSG00000164325 | 5.13E-15 | -2.63127 | 1 | 1 TMEM174  | -      |
| ENSG00000164326 | 5.13E-15 | -2.63127 | 1 | 1 CARTPT   | -      |
| ENSG00000164334 | 5.13E-15 | -2.63127 | 1 | 1 FAM170A  | -      |
| ENSG00000164344 | 5.13E-15 | -2.63127 | 1 | 1 KLKB1    | K01324 |
| ENSG00000164363 | 5.13E-15 | -2.63127 | 1 | 1 SLC6A18  | K05048 |
| ENSG00000164379 | 5.13E-15 | -2.63127 | 1 | 1 FOXQ1    | K09410 |
| ENSG00000164393 | 5.13E-15 | -2.63127 | 1 | 1 GPR111   | K08454 |
| ENSG00000164398 | 5.13E-15 | -2.63127 | 1 | 1 ACSL6    | K01897 |
| ENSG00000164399 | 5.13E-15 | -2.63127 | 1 | 1 IL3      | K04736 |
| ENSG00000164400 | 5.13E-15 | -2.63127 | 1 | 1 CSF2     | K05427 |
| ENSG00000164411 | 5.13E-15 | -2.63127 | 1 | 1 GJB7     | K07626 |
| ENSG00000164434 | 5.13E-15 | -2.63127 | 1 | 1 FABP7    | K08756 |

|                 |          |          |   |             |        |
|-----------------|----------|----------|---|-------------|--------|
| ENSG00000164440 | 5.13E-15 | -2.63127 | 1 | 1 TXLNB     | -      |
| ENSG00000164483 | 5.13E-15 | -2.63127 | 1 | 1 SAMD3     | -      |
| ENSG00000164484 | 5.13E-15 | -2.63127 | 1 | 1 TMEM200A  | -      |
| ENSG00000164488 | 5.13E-15 | -2.63127 | 1 | 1 DACT2     | -      |
| ENSG00000164500 | 5.13E-15 | -2.63127 | 1 | 1 C7orf72   | -      |
| ENSG00000164508 | 5.13E-15 | -2.63127 | 1 | 1 HIST1H2AA | K11251 |
| ENSG00000164556 | 5.13E-15 | -2.63127 | 1 | 1 FAM183B   | -      |
| ENSG00000164588 | 5.13E-15 | -2.63127 | 1 | 1 HCN1      | K04954 |
| ENSG00000164600 | 5.13E-15 | -2.63127 | 1 | 1 NEUROD6   | K09080 |
| ENSG00000164604 | 5.13E-15 | -2.63127 | 1 | 1 GPR85     | K04302 |
| ENSG00000164616 | 5.13E-15 | -2.63127 | 1 | 1 FBXL21    | K10287 |
| ENSG00000164627 | 5.13E-15 | -2.63127 | 1 | 1 KIF6      | K10397 |
| ENSG00000164645 | 5.13E-15 | -2.63127 | 1 | 1 C7orf62   | -      |
| ENSG00000164687 | 5.13E-15 | -2.63127 | 1 | 1 FABP5     | K08754 |
| ENSG00000164690 | 5.13E-15 | -2.63127 | 1 | 1 SHH       | K11988 |
| ENSG00000164692 | 5.13E-15 | -2.63127 | 1 | 1 COL1A2    | K06236 |
| ENSG00000164694 | 5.13E-15 | -2.63127 | 1 | 1 FNDC1     | -      |
| ENSG00000164708 | 5.13E-15 | -2.63127 | 1 | 1 PGAM2     | K01834 |
| ENSG00000164729 | 5.13E-15 | -2.63127 | 1 | 1 SLC35G3   | -      |
| ENSG00000164736 | 5.13E-15 | -2.63127 | 1 | 1 SOX17     | K04495 |
| ENSG00000164740 | 5.13E-15 | -2.63127 | 1 | 1 SEPT7P5   | K16944 |
| ENSG00000164743 | 5.13E-15 | -2.63127 | 1 | 1 C8orf48   | -      |
| ENSG00000164756 | 5.13E-15 | -2.63127 | 1 | 1 SLC30A8   | K14695 |
| ENSG00000164778 | 5.13E-15 | -2.63127 | 1 | 1 EN2       | K09319 |
| ENSG00000164794 | 5.13E-15 | -2.63127 | 1 | 1 KCNV1     | K04934 |
| ENSG00000164796 | 5.13E-15 | -2.63127 | 1 | 1 CSMD3     | K17495 |
| ENSG00000164816 | 5.13E-15 | -2.63127 | 1 | 1 DEFA5     | K05230 |
| ENSG00000164821 | 5.13E-15 | -2.63127 | 1 | 1 DEFA4     | K05230 |
| ENSG00000164822 | 5.13E-15 | -2.63127 | 1 | 1 DEFA6     | K05230 |
| ENSG00000164825 | 5.13E-15 | -2.63127 | 1 | 1 DEFB1     | -      |
| ENSG00000164853 | 5.13E-15 | -2.63127 | 1 | 1 UNCX      | K09328 |
| ENSG00000164871 | 5.13E-15 | -2.63127 | 1 | 1 SPAG11B   | -      |
| ENSG00000164879 | 5.13E-15 | -2.63127 | 1 | 1 CA3       | K01672 |
| ENSG00000164893 | 5.13E-15 | -2.63127 | 1 | 1 SLC7A13   | K13870 |
| ENSG00000164900 | 5.13E-15 | -2.63127 | 1 | 1 GBX1      | K09321 |
| ENSG00000164929 | 5.13E-15 | -2.63127 | 1 | 1 BAALC     | -      |
| ENSG00000164932 | 5.13E-15 | -2.63127 | 1 | 1 CTHRC1    | -      |
| ENSG00000164935 | 5.13E-15 | -2.63127 | 1 | 1 DCSTAMP   | -      |
| ENSG00000164972 | 5.13E-15 | -2.63127 | 1 | 1 C9orf24   | K18634 |
| ENSG00000165023 | 5.13E-15 | -2.63127 | 1 | 1 DIRAS2    | K07841 |
| ENSG00000165025 | 5.13E-15 | -2.63127 | 1 | 1 SYK       | K05855 |
| ENSG00000165059 | 5.13E-15 | -2.63127 | 1 | 1 PRKACG    | K04345 |
| ENSG00000165061 | 5.13E-15 | -2.63127 | 1 | 1 ZMAT4     | K03941 |
| ENSG00000165066 | 5.13E-15 | -2.63127 | 1 | 1 NKX6-3    | K09351 |
| ENSG00000165071 | 5.13E-15 | -2.63127 | 1 | 1 TMEM71    | -      |
| ENSG00000165078 | 5.13E-15 | -2.63127 | 1 | 1 CPA6      | K08782 |
| ENSG00000165091 | 5.13E-15 | -2.63127 | 1 | 1 TMC1      | -      |
| ENSG00000165105 | 5.13E-15 | -2.63127 | 1 | 1 RASEF     | K17199 |
| ENSG00000165131 | 5.13E-15 | -2.63127 | 1 | 1 C7orf34   | -      |
| ENSG00000165152 | 5.13E-15 | -2.63127 | 1 | 1 TMEM246   | -      |
| ENSG00000165164 | 5.13E-15 | -2.63127 | 1 | 1 CXorf22   | -      |
| ENSG00000165178 | 5.13E-15 | -2.63127 | 1 | 1 NCF1C     | K08011 |
| ENSG00000165182 | 5.13E-15 | -2.63127 | 1 | 1 CXorf58   | -      |
| ENSG00000165186 | 5.13E-15 | -2.63127 | 1 | 1 PTCHD1    | -      |
| ENSG00000165192 | 5.13E-15 | -2.63127 | 1 | 1 ASB11     | K10333 |
| ENSG00000165202 | 5.13E-15 | -2.63127 | 1 | 1 OR1Q1     | K04257 |
| ENSG00000165204 | 5.13E-15 | -2.63127 | 1 | 1 OR1K1     | K04257 |
| ENSG00000165215 | 5.13E-15 | -2.63127 | 1 | 1 CLDN3     | K06087 |

|                 |          |          |   |             |        |
|-----------------|----------|----------|---|-------------|--------|
| ENSG00000165259 | 5.13E-15 | -2.63127 | 1 | 1 HDX       | -      |
| ENSG00000165309 | 5.13E-15 | -2.63127 | 1 | 1 ARMC3     | -      |
| ENSG00000165323 | 5.13E-15 | -2.63127 | 1 | 1 FAT3      | K16506 |
| ENSG00000165349 | 5.13E-15 | -2.63127 | 1 | 1 SLC7A3    | K13865 |
| ENSG00000165359 | 5.13E-15 | -2.63127 | 1 | 1 DDX26B    | K13180 |
| ENSG00000165370 | 5.13E-15 | -2.63127 | 1 | 1 GPR101    | K08423 |
| ENSG00000165376 | 5.13E-15 | -2.63127 | 1 | 1 CLDN2     | K06087 |
| ENSG00000165379 | 5.13E-15 | -2.63127 | 1 | 1 LRFN5     | K16358 |
| ENSG00000165383 | 5.13E-15 | -2.63127 | 1 | 1 LRRC18    | -      |
| ENSG00000165388 | 5.13E-15 | -2.63127 | 1 | 1 ZNF488    | -      |
| ENSG00000165443 | 5.13E-15 | -2.63127 | 1 | 1 PHYHIPL   | -      |
| ENSG00000165471 | 5.13E-15 | -2.63127 | 1 | 1 MBL2      | K03991 |
| ENSG00000165474 | 5.13E-15 | -2.63127 | 1 | 1 GJB2      | K07621 |
| ENSG00000165478 | 5.13E-15 | -2.63127 | 1 | 1 HEPACAM   | -      |
| ENSG00000165495 | 5.13E-15 | -2.63127 | 1 | 1 PKNOX2    | -      |
| ENSG00000165496 | 5.13E-15 | -2.63127 | 1 | 1 RPL10L    | K02866 |
| ENSG00000165509 | 5.13E-15 | -2.63127 | 1 | 1 MAGEC3    | -      |
| ENSG00000165511 | 5.13E-15 | -2.63127 | 1 | 1 C10orf25  | -      |
| ENSG00000165512 | 5.13E-15 | -2.63127 | 1 | 1 ZNF22     | K09228 |
| ENSG00000165553 | 5.13E-15 | -2.63127 | 1 | 1 NGB       | -      |
| ENSG00000165556 | 5.13E-15 | -2.63127 | 1 | 1 CDX2      | K09312 |
| ENSG00000165566 | 5.13E-15 | -2.63127 | 1 | 1 AMER2     | K12581 |
| ENSG00000165568 | 5.13E-15 | -2.63127 | 1 | 1 AKR1E2    | K13981 |
| ENSG00000165583 | 5.13E-15 | -2.63127 | 1 | 1 SSX5      | K15624 |
| ENSG00000165584 | 5.13E-15 | -2.63127 | 1 | 1 SSX3      | K15625 |
| ENSG00000165588 | 5.13E-15 | -2.63127 | 1 | 1 OTX2      | K18490 |
| ENSG00000165606 | 5.13E-15 | -2.63127 | 1 | 1 DRGX      | K09452 |
| ENSG00000165621 | 5.13E-15 | -2.63127 | 1 | 1 OXGR1     | K08419 |
| ENSG00000165623 | 5.13E-15 | -2.63127 | 1 | 1 UCMA      | -      |
| ENSG00000165626 | 5.13E-15 | -2.63127 | 1 | 1 BEND7     | -      |
| ENSG00000165633 | 5.13E-15 | -2.63127 | 1 | 1 VSTM4     | K17985 |
| ENSG00000165643 | 5.13E-15 | -2.63127 | 1 | 1 SOHLH1    | -      |
| ENSG00000165659 | 5.13E-15 | -2.63127 | 1 | 1 DACH1     | -      |
| ENSG00000165682 | 5.13E-15 | -2.63127 | 1 | 1 CLEC1B    | K10070 |
| ENSG00000165694 | 5.13E-15 | -2.63127 | 1 | 1 FRMD7     | -      |
| ENSG00000165731 | 5.13E-15 | -2.63127 | 1 | 1 RET       | K05126 |
| ENSG00000165762 | 5.13E-15 | -2.63127 | 1 | 1 OR4K2     | K04257 |
| ENSG00000165794 | 5.13E-15 | -2.63127 | 1 | 1 SLC39A2   | K14709 |
| ENSG00000165799 | 5.13E-15 | -2.63127 | 1 | 1 RNASE7    | K01172 |
| ENSG00000165810 | 5.13E-15 | -2.63127 | 1 | 1 BTNL9     | K06712 |
| ENSG00000165816 | 5.13E-15 | -2.63127 | 1 | 1 VWA2      | K09228 |
| ENSG00000165821 | 5.13E-15 | -2.63127 | 1 | 1 SALL2     | -      |
| ENSG00000165841 | 5.13E-15 | -2.63127 | 1 | 1 CYP2C19   | K17721 |
| ENSG00000165862 | 5.13E-15 | -2.63127 | 1 | 1 PNLIPRP2  | K14075 |
| ENSG00000165863 | 5.13E-15 | -2.63127 | 1 | 1 C10orf82  | -      |
| ENSG00000165868 | 5.13E-15 | -2.63127 | 1 | 1 HSPA12A   | -      |
| ENSG00000165874 | 5.13E-15 | -2.63127 | 1 | 1 FAM35BP   | -      |
| ENSG00000165953 | 5.13E-15 | -2.63127 | 1 | 1 SERPINA12 | K04525 |
| ENSG00000165970 | 5.13E-15 | -2.63127 | 1 | 1 SLC6A5    | K05038 |
| ENSG00000165973 | 5.13E-15 | -2.63127 | 1 | 1 NELL1     | -      |
| ENSG00000166006 | 5.13E-15 | -2.63127 | 1 | 1 KCNC2     | K04888 |
| ENSG00000166007 | 5.13E-15 | -2.63127 | 1 | 1 TRIM51HP  | K12019 |
| ENSG00000166008 | 5.13E-15 | -2.63127 | 1 | 1 MAGEA9    | -      |
| ENSG00000166013 | 5.13E-15 | -2.63127 | 1 | 1 TRIM53BP  | K12019 |
| ENSG00000166035 | 5.13E-15 | -2.63127 | 1 | 1 LIPC      | K01046 |
| ENSG00000166049 | 5.13E-15 | -2.63127 | 1 | 1 PASD1     | -      |
| ENSG00000166069 | 5.13E-15 | -2.63127 | 1 | 1 TMC05A    | -      |
| ENSG00000166090 | 5.13E-15 | -2.63127 | 1 | 1 IL25      | K05493 |

|                 |          |          |   |                |        |
|-----------------|----------|----------|---|----------------|--------|
| ENSG00000166091 | 5.13E-15 | -2.63127 | 1 | 1 CMTM5        | -      |
| ENSG00000166104 | 5.13E-15 | -2.63127 | 1 | 1 hsa-mir-7162 | K17985 |
| ENSG00000166105 | 5.13E-15 | -2.63127 | 1 | 1 GLB1L3       | -      |
| ENSG00000166111 | 5.13E-15 | -2.63127 | 1 | 1 SVOP         | -      |
| ENSG00000166118 | 5.13E-15 | -2.63127 | 1 | 1 SPATA19      | -      |
| ENSG00000166148 | 5.13E-15 | -2.63127 | 1 | 1 AVPR1A       | K04226 |
| ENSG00000166152 | 5.13E-15 | -2.63127 | 1 | 1 C16orf78     | -      |
| ENSG00000166157 | 5.13E-15 | -2.63127 | 1 | 1 TPTE         | K18079 |
| ENSG00000166160 | 5.13E-15 | -2.63127 | 1 | 1 OPN1MW2      | K04251 |
| ENSG00000166206 | 5.13E-15 | -2.63127 | 1 | 1 GABRB3       | K05181 |
| ENSG00000166211 | 5.13E-15 | -2.63127 | 1 | 1 SPIC         | K09440 |
| ENSG00000166265 | 5.13E-15 | -2.63127 | 1 | 1 CYYR1        | -      |
| ENSG00000166268 | 5.13E-15 | -2.63127 | 1 | 1 MYRFL        | -      |
| ENSG00000166278 | 5.13E-15 | -2.63127 | 1 | 1 C2           | K01332 |
| ENSG00000166292 | 5.13E-15 | -2.63127 | 1 | 1 TMEM100      | -      |
| ENSG00000166329 | 5.13E-15 | -2.63127 | 1 | 1 CCDC182      | -      |
| ENSG00000166342 | 5.13E-15 | -2.63127 | 1 | 1 NETO1        | -      |
| ENSG00000166347 | 5.13E-15 | -2.63127 | 1 | 1 CYB5A        | -      |
| ENSG00000166351 | 5.13E-15 | -2.63127 | 1 | 1 POTES        | K17299 |
| ENSG00000166363 | 5.13E-15 | -2.63127 | 1 | 1 OR10A5       | K04257 |
| ENSG00000166368 | 5.13E-15 | -2.63127 | 1 | 1 OR2D2        | K04257 |
| ENSG00000166391 | 5.13E-15 | -2.63127 | 1 | 1 MOGAT2       | K14457 |
| ENSG00000166405 | 5.13E-15 | -2.63127 | 1 | 1 RIC3         | -      |
| ENSG00000166408 | 5.13E-15 | -2.63127 | 1 | 1 OR5P1P       | K04257 |
| ENSG00000166426 | 5.13E-15 | -2.63127 | 1 | 1 CRABP1       | K17337 |
| ENSG00000166448 | 5.13E-15 | -2.63127 | 1 | 1 TMEM130      | -      |
| ENSG00000166503 | 5.13E-15 | -2.63127 | 1 | 1 HDGFRP3      | K16641 |
| ENSG00000166509 | 5.13E-15 | -2.63127 | 1 | 1 CLEC3A       | K17519 |
| ENSG00000166523 | 5.13E-15 | -2.63127 | 1 | 1 CLEC4E       | K10059 |
| ENSG00000166527 | 5.13E-15 | -2.63127 | 1 | 1 CLEC4D       | K10058 |
| ENSG00000166530 | 5.13E-15 | -2.63127 | 1 | 1 HSBP1P2      | K19765 |
| ENSG00000166535 | 5.13E-15 | -2.63127 | 1 | 1 A2ML1        | -      |
| ENSG00000166558 | 5.13E-15 | -2.63127 | 1 | 1 SLC38A8      | K14994 |
| ENSG00000166569 | 5.13E-15 | -2.63127 | 1 | 1 CPLX4        | K15295 |
| ENSG00000166573 | 5.13E-15 | -2.63127 | 1 | 1 GALR1        | K04230 |
| ENSG00000166603 | 5.13E-15 | -2.63127 | 1 | 1 MC4R         | K04202 |
| ENSG00000166634 | 5.13E-15 | -2.63127 | 1 | 1 SERPINB12    | K13966 |
| ENSG00000166664 | 5.13E-15 | -2.63127 | 1 | 1 CHRFBAM7A    | K04809 |
| ENSG00000166693 | 5.13E-15 | -2.63127 | 1 | 1 OR5M13P      | K04257 |
| ENSG00000166707 | 5.13E-15 | -2.63127 | 1 | 1 ZCCHC18      | -      |
| ENSG00000166743 | 5.13E-15 | -2.63127 | 1 | 1 ACSM1        | K01896 |
| ENSG00000166748 | 5.13E-15 | -2.63127 | 1 | 1 AGLB1        | -      |
| ENSG00000166770 | 5.13E-15 | -2.63127 | 1 | 1 ZNF667-AS1   | -      |
| ENSG00000166787 | 5.13E-15 | -2.63127 | 1 | 1 SAA3P        | K17310 |
| ENSG00000166796 | 5.13E-15 | -2.63127 | 1 | 1 LDHC         | K00016 |
| ENSG00000166800 | 5.13E-15 | -2.63127 | 1 | 1 LDHAL6A      | K00016 |
| ENSG00000166828 | 5.13E-15 | -2.63127 | 1 | 1 SCNN1G       | K04827 |
| ENSG00000166840 | 5.13E-15 | -2.63127 | 1 | 1 GLYATL1      | -      |
| ENSG00000166862 | 5.13E-15 | -2.63127 | 1 | 1 CACNG2       | -      |
| ENSG00000166869 | 5.13E-15 | -2.63127 | 1 | 1 CHP2         | K17611 |
| ENSG00000166884 | 5.13E-15 | -2.63127 | 1 | 1 OR4D6        | K04257 |
| ENSG00000166896 | 5.13E-15 | -2.63127 | 1 | 1 XRCC6BP1     | K18156 |
| ENSG00000166917 | 5.13E-15 | -2.63127 | 1 | 1 MIR202HG     | -      |
| ENSG00000166926 | 5.13E-15 | -2.63127 | 1 | 1 MS4A6E       | -      |
| ENSG00000166928 | 5.13E-15 | -2.63127 | 1 | 1 MS4A14       | -      |
| ENSG00000166930 | 5.13E-15 | -2.63127 | 1 | 1 MS4A5        | -      |
| ENSG00000166948 | 5.13E-15 | -2.63127 | 1 | 1 TGM6         | K05624 |
| ENSG00000166959 | 5.13E-15 | -2.63127 | 1 | 1 MS4A8        | -      |

|                 |          |          |   |                 |        |
|-----------------|----------|----------|---|-----------------|--------|
| ENSG00000166960 | 5.13E-15 | -2.63127 | 1 | 1 CCDC178       | -      |
| ENSG00000166961 | 5.13E-15 | -2.63127 | 1 | 1 MS4A15        | -      |
| ENSG00000166984 | 5.13E-15 | -2.63127 | 1 | 1 TCP10L2       | -      |
| ENSG00000167014 | 5.13E-15 | -2.63127 | 1 | 1 C15orf43      | -      |
| ENSG00000167080 | 5.13E-15 | -2.63127 | 1 | 1 B4GALNT2      | K09655 |
| ENSG00000167098 | 5.13E-15 | -2.63127 | 1 | 1 SUN5          | -      |
| ENSG00000167117 | 5.13E-15 | -2.63127 | 1 | 1 LINC00483     | -      |
| ENSG00000167139 | 5.13E-15 | -2.63127 | 1 | 1 TBC1D21       | -      |
| ENSG00000167194 | 5.13E-15 | -2.63127 | 1 | 1 C16orf92      | -      |
| ENSG00000167195 | 5.13E-15 | -2.63127 | 1 | 1 GOLGA6C       | K10595 |
| ENSG00000167207 | 5.13E-15 | -2.63127 | 1 | 1 NOD2          | K10165 |
| ENSG00000167208 | 5.13E-15 | -2.63127 | 1 | 1 SNX20         | K17931 |
| ENSG00000167210 | 5.13E-15 | -2.63127 | 1 | 1 LOXHD1        | -      |
| ENSG00000167236 | 5.13E-15 | -2.63127 | 1 | 1 CCL23         | K05511 |
| ENSG00000167286 | 5.13E-15 | -2.63127 | 1 | 1 CD3D          | K06450 |
| ENSG00000167346 | 5.13E-15 | -2.63127 | 1 | 1 MMP26         | K08004 |
| ENSG00000167359 | 5.13E-15 | -2.63127 | 1 | 1 OR51I1        | K04257 |
| ENSG00000167360 | 5.13E-15 | -2.63127 | 1 | 1 OR51Q1        | K04257 |
| ENSG00000167390 | 5.13E-15 | -2.63127 | 1 | 1 POM121L3P     | -      |
| ENSG00000167419 | 5.13E-15 | -2.63127 | 1 | 1 LPO           | K12550 |
| ENSG00000167434 | 5.13E-15 | -2.63127 | 1 | 1 CA4           | K18246 |
| ENSG00000167459 | 5.13E-15 | -2.63127 | 1 | 1 LINC00905     | -      |
| ENSG00000167494 | 5.13E-15 | -2.63127 | 1 | 1 NOS2P2        | K13241 |
| ENSG00000167554 | 5.13E-15 | -2.63127 | 1 | 1 ZNF610        | K09228 |
| ENSG00000167562 | 5.13E-15 | -2.63127 | 1 | 1 ZNF701        | K09228 |
| ENSG00000167580 | 5.13E-15 | -2.63127 | 1 | 1 AQP2          | K09865 |
| ENSG00000167608 | 5.13E-15 | -2.63127 | 1 | 1 TMC4          | -      |
| ENSG00000167612 | 5.13E-15 | -2.63127 | 1 | 1 ANKRD33       | -      |
| ENSG00000167613 | 5.13E-15 | -2.63127 | 1 | 1 LAIR1         | K06725 |
| ENSG00000167614 | 5.13E-15 | -2.63127 | 1 | 1 TTYH1         | -      |
| ENSG00000167618 | 5.13E-15 | -2.63127 | 1 | 1 LAIR2         | K06725 |
| ENSG00000167633 | 5.13E-15 | -2.63127 | 1 | 1 KIR3DL1       | K07980 |
| ENSG00000167634 | 5.13E-15 | -2.63127 | 1 | 1 NLRP7         | K19409 |
| ENSG00000167653 | 5.13E-15 | -2.63127 | 1 | 1 PSCA          | -      |
| ENSG00000167664 | 5.13E-15 | -2.63127 | 1 | 1 TMIGD2        | K16668 |
| ENSG00000167741 | 5.13E-15 | -2.63127 | 1 | 1 GGT6          | K00681 |
| ENSG00000167749 | 5.13E-15 | -2.63127 | 1 | 1 KLK4          | K08666 |
| ENSG00000167755 | 5.13E-15 | -2.63127 | 1 | 1 KLK6          | K08667 |
| ENSG00000167757 | 5.13E-15 | -2.63127 | 1 | 1 KLK11         | K09620 |
| ENSG00000167759 | 5.13E-15 | -2.63127 | 1 | 1 KLK13         | K09463 |
| ENSG00000167766 | 5.13E-15 | -2.63127 | 1 | 1 ZNF83         | K09228 |
| ENSG00000167768 | 5.13E-15 | -2.63127 | 1 | 1 KRT1          | K07605 |
| ENSG00000167769 | 5.13E-15 | -2.63127 | 1 | 1 ACER1         | K01441 |
| ENSG00000167791 | 5.13E-15 | -2.63127 | 1 | 1 CABP2         | -      |
| ENSG00000167798 | 5.13E-15 | -2.63127 | 1 | 1 C3P1          | K03990 |
| ENSG00000167800 | 5.13E-15 | -2.63127 | 1 | 1 TBX10         | K10181 |
| ENSG00000167807 | 5.13E-15 | -2.63127 | 1 | 1 CTD-2369P2.10 | -      |
| ENSG00000167822 | 5.13E-15 | -2.63127 | 1 | 1 OR8J3         | K04257 |
| ENSG00000167825 | 5.13E-15 | -2.63127 | 1 | 1 OR51I         | K04257 |
| ENSG00000167850 | 5.13E-15 | -2.63127 | 1 | 1 CD300C        | K06719 |
| ENSG00000167851 | 5.13E-15 | -2.63127 | 1 | 1 CD300A        | K06719 |
| ENSG00000167858 | 5.13E-15 | -2.63127 | 1 | 1 TEK1          | K18628 |
| ENSG00000167910 | 5.13E-15 | -2.63127 | 1 | 1 CYP7A1        | K00489 |
| ENSG00000167912 | 5.13E-15 | -2.63127 | 1 | 1 RP11-25K19.1  | -      |
| ENSG00000167914 | 5.13E-15 | -2.63127 | 1 | 1 GSDMA         | K12581 |
| ENSG00000167916 | 5.13E-15 | -2.63127 | 1 | 1 KRT24         | K07604 |
| ENSG00000167970 | 5.13E-15 | -2.63127 | 1 | 1 AC009065.1    | K14325 |
| ENSG00000168004 | 5.13E-15 | -2.63127 | 1 | 1 HRASLS5       | -      |

|                 |          |          |   |              |        |
|-----------------|----------|----------|---|--------------|--------|
| ENSG00000168065 | 5.13E-15 | -2.63127 | 1 | 1 SLC22A11   | K08207 |
| ENSG00000168070 | 5.13E-15 | -2.63127 | 1 | 1 C11orf85   | -      |
| ENSG00000168081 | 5.13E-15 | -2.63127 | 1 | 1 PNOC       | -      |
| ENSG00000168122 | 5.13E-15 | -2.63127 | 1 | 1 ZNF355P    | K09228 |
| ENSG00000168129 | 5.13E-15 | -2.63127 | 1 | 1 AC098817.5 | K00287 |
| ENSG00000168131 | 5.13E-15 | -2.63127 | 1 | 1 OR2B2      | K04257 |
| ENSG00000168158 | 5.13E-15 | -2.63127 | 1 | 1 OR2C1      | K04257 |
| ENSG00000168229 | 5.13E-15 | -2.63127 | 1 | 1 PTGDR      | K04332 |
| ENSG00000168260 | 5.13E-15 | -2.63127 | 1 | 1 C14orf183  | -      |
| ENSG00000168267 | 5.13E-15 | -2.63127 | 1 | 1 PTF1A      | K09073 |
| ENSG00000168280 | 5.13E-15 | -2.63127 | 1 | 1 KIF5C      | K10396 |
| ENSG00000168309 | 5.13E-15 | -2.63127 | 1 | 1 FAM107A    | -      |
| ENSG00000168314 | 5.13E-15 | -2.63127 | 1 | 1 MOBP       | -      |
| ENSG00000168329 | 5.13E-15 | -2.63127 | 1 | 1 CX3CR1     | K04192 |
| ENSG00000168334 | 5.13E-15 | -2.63127 | 1 | 1 XIRP1      | -      |
| ENSG00000168348 | 5.13E-15 | -2.63127 | 1 | 1 INSM2      | -      |
| ENSG00000168394 | 5.13E-15 | -2.63127 | 1 | 1 TAP1       | K05653 |
| ENSG00000168412 | 5.13E-15 | -2.63127 | 1 | 1 MTNR1A     | K04285 |
| ENSG00000168418 | 5.13E-15 | -2.63127 | 1 | 1 KCNG4      | K04903 |
| ENSG00000168421 | 5.13E-15 | -2.63127 | 1 | 1 RHOH       | -      |
| ENSG00000168447 | 5.13E-15 | -2.63127 | 1 | 1 SCNN1B     | K04825 |
| ENSG00000168477 | 5.13E-15 | -2.63127 | 1 | 1 TNXB       | K06252 |
| ENSG00000168509 | 5.13E-15 | -2.63127 | 1 | 1 HFE2       | K06847 |
| ENSG00000168515 | 5.13E-15 | -2.63127 | 1 | 1 SCGB1D1    | -      |
| ENSG00000168530 | 5.13E-15 | -2.63127 | 1 | 1 MYL1       | K05738 |
| ENSG00000168546 | 5.13E-15 | -2.63127 | 1 | 1 GFRA2      | -      |
| ENSG00000168582 | 5.13E-15 | -2.63127 | 1 | 1 CRYGA      | -      |
| ENSG00000168594 | 5.13E-15 | -2.63127 | 1 | 1 ADAM29     | K16069 |
| ENSG00000168619 | 5.13E-15 | -2.63127 | 1 | 1 ADAM18     | K16909 |
| ENSG00000168621 | 5.13E-15 | -2.63127 | 1 | 1 GDNF       | K05452 |
| ENSG00000168630 | 5.13E-15 | -2.63127 | 1 | 1 SPINT5P    | -      |
| ENSG00000168631 | 5.13E-15 | -2.63127 | 1 | 1 DPCR1      | -      |
| ENSG00000168634 | 5.13E-15 | -2.63127 | 1 | 1 WFDC13     | -      |
| ENSG00000168658 | 5.13E-15 | -2.63127 | 1 | 1 VWA3B      | -      |
| ENSG00000168671 | 5.13E-15 | -2.63127 | 1 | 1 UGT3A2     | -      |
| ENSG00000168703 | 5.13E-15 | -2.63127 | 1 | 1 WFDC12     | K10397 |
| ENSG00000168746 | 5.13E-15 | -2.63127 | 1 | 1 C20orf62   | -      |
| ENSG00000168757 | 5.13E-15 | -2.63127 | 1 | 1 TSPY2      | K11284 |
| ENSG00000168785 | 5.13E-15 | -2.63127 | 1 | 1 TSPAN5     | K17345 |
| ENSG00000168787 | 5.13E-15 | -2.63127 | 1 | 1 OR12D2     | K04257 |
| ENSG00000168811 | 5.13E-15 | -2.63127 | 1 | 1 IL12A      | K05406 |
| ENSG00000168828 | 5.13E-15 | -2.63127 | 1 | 1 OR13J1     | K04257 |
| ENSG00000168830 | 5.13E-15 | -2.63127 | 1 | 1 HTR1E      | K04153 |
| ENSG00000168852 | 5.13E-15 | -2.63127 | 1 | 1 TPTE2P5    | K18079 |
| ENSG00000168875 | 5.13E-15 | -2.63127 | 1 | 1 SOX14      | K09267 |
| ENSG00000168903 | 5.13E-15 | -2.63127 | 1 | 1 BTNL3      | K06712 |
| ENSG00000168907 | 5.13E-15 | -2.63127 | 1 | 1 PLA2G4F    | K16342 |
| ENSG00000168916 | 5.13E-15 | -2.63127 | 1 | 1 ZNF608     | -      |
| ENSG00000168925 | 5.13E-15 | -2.63127 | 1 | 1 CTRB1      | K01310 |
| ENSG00000168928 | 5.13E-15 | -2.63127 | 1 | 1 CTRB2      | K01310 |
| ENSG00000168930 | 5.13E-15 | -2.63127 | 1 | 1 TRIM49     | K12019 |
| ENSG00000168952 | 5.13E-15 | -2.63127 | 1 | 1 STXBP6     | K08519 |
| ENSG00000168959 | 5.13E-15 | -2.63127 | 1 | 1 GRM5       | K04604 |
| ENSG00000168967 | 5.13E-15 | -2.63127 | 1 | 1 PMCHL1     | K05229 |
| ENSG00000168992 | 5.13E-15 | -2.63127 | 1 | 1 OR7E102P   | K04257 |
| ENSG00000168995 | 5.13E-15 | -2.63127 | 1 | 1 SIGLEC7    | K06739 |
| ENSG00000169006 | 5.13E-15 | -2.63127 | 1 | 1 NTSR2      | K04212 |
| ENSG00000169035 | 5.13E-15 | -2.63127 | 1 | 1 KLK7       | K08668 |

|                 |          |          |   |                 |        |
|-----------------|----------|----------|---|-----------------|--------|
| ENSG00000169040 | 5.13E-15 | -2.63127 | 1 | 1 PMCHL2        | K05229 |
| ENSG00000169059 | 5.13E-15 | -2.63127 | 1 | 1 VCX3A         | -      |
| ENSG00000169064 | 5.13E-15 | -2.63127 | 1 | 1 ZBBX          | -      |
| ENSG00000169075 | 5.13E-15 | -2.63127 | 1 | 1 BRD7P3        | K11723 |
| ENSG00000169083 | 5.13E-15 | -2.63127 | 1 | 1 AR            | K08557 |
| ENSG00000169116 | 5.13E-15 | -2.63127 | 1 | 1 PARM1         | -      |
| ENSG00000169154 | 5.13E-15 | -2.63127 | 1 | 1 GOT1L1        | -      |
| ENSG00000169164 | 5.13E-15 | -2.63127 | 1 | 1 RP11-167P23.2 | -      |
| ENSG00000169181 | 5.13E-15 | -2.63127 | 1 | 1 GSG1L         | -      |
| ENSG00000169194 | 5.13E-15 | -2.63127 | 1 | 1 IL13          | K05435 |
| ENSG00000169202 | 5.13E-15 | -2.63127 | 1 | 1 OR10G1P       | K04257 |
| ENSG00000169208 | 5.13E-15 | -2.63127 | 1 | 1 OR10G3        | K04257 |
| ENSG00000169213 | 5.13E-15 | -2.63127 | 1 | 1 RAB3B         | K06108 |
| ENSG00000169214 | 5.13E-15 | -2.63127 | 1 | 1 OR6F1         | K04257 |
| ENSG00000169218 | 5.13E-15 | -2.63127 | 1 | 1 RSPO1         | K19471 |
| ENSG00000169224 | 5.13E-15 | -2.63127 | 1 | 1 GCSAML        | -      |
| ENSG00000169253 | 5.13E-15 | -2.63127 | 1 | 1 RP11-220D10.1 | K02920 |
| ENSG00000169255 | 5.13E-15 | -2.63127 | 1 | 1 B3GALNT1      | -      |
| ENSG00000169291 | 5.13E-15 | -2.63127 | 1 | 1 SHE           | K02927 |
| ENSG00000169297 | 5.13E-15 | -2.63127 | 1 | 1 NR0B1         | K08562 |
| ENSG00000169302 | 5.13E-15 | -2.63127 | 1 | 1 STK32A        | K08793 |
| ENSG00000169306 | 5.13E-15 | -2.63127 | 1 | 1 IL1RAPL1      | K05170 |
| ENSG00000169313 | 5.13E-15 | -2.63127 | 1 | 1 P2RY12        | K04298 |
| ENSG00000169325 | 5.13E-15 | -2.63127 | 1 | 1 GUSBP12       | K01195 |
| ENSG00000169327 | 5.13E-15 | -2.63127 | 1 | 1 OR5AU1        | K04257 |
| ENSG00000169340 | 5.13E-15 | -2.63127 | 1 | 1 PDILT         | K09654 |
| ENSG00000169344 | 5.13E-15 | -2.63127 | 1 | 1 UMOD          | K18274 |
| ENSG00000169347 | 5.13E-15 | -2.63127 | 1 | 1 GP2           | K04613 |
| ENSG00000169385 | 5.13E-15 | -2.63127 | 1 | 1 RNASE2        | K01168 |
| ENSG00000169393 | 5.13E-15 | -2.63127 | 1 | 1 ELSPBP1       | -      |
| ENSG00000169397 | 5.13E-15 | -2.63127 | 1 | 1 RNASE3        | K10787 |
| ENSG00000169402 | 5.13E-15 | -2.63127 | 1 | 1 RSPH10B2      | -      |
| ENSG00000169413 | 5.13E-15 | -2.63127 | 1 | 1 RNASE6        | K01172 |
| ENSG00000169427 | 5.13E-15 | -2.63127 | 1 | 1 KCNK9         | K04919 |
| ENSG00000169432 | 5.13E-15 | -2.63127 | 1 | 1 SCN9A         | K04841 |
| ENSG00000169435 | 5.13E-15 | -2.63127 | 1 | 1 RASSF6        | K09854 |
| ENSG00000169436 | 5.13E-15 | -2.63127 | 1 | 1 COL22A1       | K16630 |
| ENSG00000169442 | 5.13E-15 | -2.63127 | 1 | 1 CD52          | K06488 |
| ENSG00000169469 | 5.13E-15 | -2.63127 | 1 | 1 SPRR1B        | -      |
| ENSG00000169474 | 5.13E-15 | -2.63127 | 1 | 1 SPRR1A        | -      |
| ENSG00000169484 | 5.13E-15 | -2.63127 | 1 | 1 OR4K14        | K04257 |
| ENSG00000169488 | 5.13E-15 | -2.63127 | 1 | 1 OR4K15        | K04257 |
| ENSG00000169495 | 5.13E-15 | -2.63127 | 1 | 1 HTRA4         | K08786 |
| ENSG00000169507 | 5.13E-15 | -2.63127 | 1 | 1 SLC38A11      | K14997 |
| ENSG00000169509 | 5.13E-15 | -2.63127 | 1 | 1 CRCT1         | -      |
| ENSG00000169515 | 5.13E-15 | -2.63127 | 1 | 1 CCDC8         | K17561 |
| ENSG00000169548 | 5.13E-15 | -2.63127 | 1 | 1 ZNF280A       | -      |
| ENSG00000169550 | 5.13E-15 | -2.63127 | 1 | 1 MUC15         | K19498 |
| ENSG00000169551 | 5.13E-15 | -2.63127 | 1 | 1 CT55          | -      |
| ENSG00000169562 | 5.13E-15 | -2.63127 | 1 | 1 GJB1          | K07620 |
| ENSG00000169575 | 5.13E-15 | -2.63127 | 1 | 1 VPRESB1       | K06553 |
| ENSG00000169594 | 5.13E-15 | -2.63127 | 1 | 1 BNC1          | -      |
| ENSG00000169618 | 5.13E-15 | -2.63127 | 1 | 1 PROKR1        | K08379 |
| ENSG00000169662 | 5.13E-15 | -2.63127 | 1 | 1 BCRP6         | K08878 |
| ENSG00000169676 | 5.13E-15 | -2.63127 | 1 | 1 DRD5          | K05840 |
| ENSG00000169688 | 5.13E-15 | -2.63127 | 1 | 1 MT1B          | K14739 |
| ENSG00000169704 | 5.13E-15 | -2.63127 | 1 | 1 GP9           | K06263 |
| ENSG00000169715 | 5.13E-15 | -2.63127 | 1 | 1 MT1E          | K14739 |



|                 |          |          |   |                |        |
|-----------------|----------|----------|---|----------------|--------|
| ENSG00000169717 | 5.13E-15 | -2.63127 | 1 | 1 ACTRT2       | -      |
| ENSG00000169744 | 5.13E-15 | -2.63127 | 1 | 1 LDB2         | -      |
| ENSG00000169760 | 5.13E-15 | -2.63127 | 1 | 1 NLGN1        | K07378 |
| ENSG00000169763 | 5.13E-15 | -2.63127 | 1 | 1 PRYP3        | -      |
| ENSG00000169783 | 5.13E-15 | -2.63127 | 1 | 1 LINGO1       | -      |
| ENSG00000169789 | 5.13E-15 | -2.63127 | 1 | 1 PRY          | -      |
| ENSG00000169800 | 5.13E-15 | -2.63127 | 1 | 1 RBMY1F       | K12885 |
| ENSG00000169807 | 5.13E-15 | -2.63127 | 1 | 1 PRY2         | -      |
| ENSG00000169811 | 5.13E-15 | -2.63127 | 1 | 1 RBMY1HP      | K12885 |
| ENSG00000169836 | 5.13E-15 | -2.63127 | 1 | 1 TACR3        | K04224 |
| ENSG00000169840 | 5.13E-15 | -2.63127 | 1 | 1 GSX1         | K09310 |
| ENSG00000169849 | 5.13E-15 | -2.63127 | 1 | 1 TSPY14P      | K11284 |
| ENSG00000169856 | 5.13E-15 | -2.63127 | 1 | 1 ONECUT1      | K08026 |
| ENSG00000169860 | 5.13E-15 | -2.63127 | 1 | 1 P2RY1        | K04270 |
| ENSG00000169861 | 5.13E-15 | -2.63127 | 1 | 1 IGHV1OR21-1  | K06856 |
| ENSG00000169862 | 5.13E-15 | -2.63127 | 1 | 1 CTNND2       | -      |
| ENSG00000169876 | 5.13E-15 | -2.63127 | 1 | 1 MUC17        | -      |
| ENSG00000169877 | 5.13E-15 | -2.63127 | 1 | 1 AHSP         | -      |
| ENSG00000169900 | 5.13E-15 | -2.63127 | 1 | 1 PYDC1        | K12802 |
| ENSG00000169906 | 5.13E-15 | -2.63127 | 1 | 1 S100G        | K14734 |
| ENSG00000169933 | 5.13E-15 | -2.63127 | 1 | 1 FRMPD4       | K00948 |
| ENSG00000169953 | 5.13E-15 | -2.63127 | 1 | 1 HSFY2        | -      |
| ENSG00000170006 | 5.13E-15 | -2.63127 | 1 | 1 TMEM154      | -      |
| ENSG00000170011 | 5.13E-15 | -2.63127 | 1 | 1 MYRIP        | -      |
| ENSG00000170017 | 5.13E-15 | -2.63127 | 1 | 1 ALCAM        | K06547 |
| ENSG00000170054 | 5.13E-15 | -2.63127 | 1 | 1 SERPINA9     | K04525 |
| ENSG00000170074 | 5.13E-15 | -2.63127 | 1 | 1 FAM153A      | K12581 |
| ENSG00000170085 | 5.13E-15 | -2.63127 | 1 | 1 SIMC1        | -      |
| ENSG00000170091 | 5.13E-15 | -2.63127 | 1 | 1 NSG2         | -      |
| ENSG00000170099 | 5.13E-15 | -2.63127 | 1 | 1 SERPINA6     | K04525 |
| ENSG00000170128 | 5.13E-15 | -2.63127 | 1 | 1 GPR25        | K08405 |
| ENSG00000170152 | 5.13E-15 | -2.63127 | 1 | 1 RP11-374M1.7 | -      |
| ENSG00000170160 | 5.13E-15 | -2.63127 | 1 | 1 CCDC144A     | -      |
| ENSG00000170165 | 5.13E-15 | -2.63127 | 1 | 1 CR848007.2   | K17299 |
| ENSG00000170178 | 5.13E-15 | -2.63127 | 1 | 1 HOXD12       | K09297 |
| ENSG00000170180 | 5.13E-15 | -2.63127 | 1 | 1 GYP A        | K06575 |
| ENSG00000170209 | 5.13E-15 | -2.63127 | 1 | 1 ANKK1        | K16289 |
| ENSG00000170214 | 5.13E-15 | -2.63127 | 1 | 1 ADRA1B       | K04136 |
| ENSG00000170215 | 5.13E-15 | -2.63127 | 1 | 1 FAM27B       | -      |
| ENSG00000170217 | 5.13E-15 | -2.63127 | 1 | 1 RP11-12A20.2 | -      |
| ENSG00000170236 | 5.13E-15 | -2.63127 | 1 | 1 USP50        | K09228 |
| ENSG00000170255 | 5.13E-15 | -2.63127 | 1 | 1 MRGPRX1      | K08396 |
| ENSG00000170276 | 5.13E-15 | -2.63127 | 1 | 1 HSPB2        | K09543 |
| ENSG00000170279 | 5.13E-15 | -2.63127 | 1 | 1 C7orf33      | -      |
| ENSG00000170293 | 5.13E-15 | -2.63127 | 1 | 1 CMTM8        | -      |
| ENSG00000170323 | 5.13E-15 | -2.63127 | 1 | 1 FABP4        | K08753 |
| ENSG00000170324 | 5.13E-15 | -2.63127 | 1 | 1 FRMPD2       | -      |
| ENSG00000170356 | 5.13E-15 | -2.63127 | 1 | 1 OR2A20P      | K04257 |
| ENSG00000170367 | 5.13E-15 | -2.63127 | 1 | 1 CST5         | K13901 |
| ENSG00000170369 | 5.13E-15 | -2.63127 | 1 | 1 CST2         | K13898 |
| ENSG00000170370 | 5.13E-15 | -2.63127 | 1 | 1 EMX2         | K09317 |
| ENSG00000170373 | 5.13E-15 | -2.63127 | 1 | 1 CST1         | K13897 |
| ENSG00000170381 | 5.13E-15 | -2.63127 | 1 | 1 SEMA3E       | K06840 |
| ENSG00000170396 | 5.13E-15 | -2.63127 | 1 | 1 ZNF804A      | -      |
| ENSG00000170409 | 5.13E-15 | -2.63127 | 1 | 1 CTA-313A17.2 | K13055 |
| ENSG00000170423 | 5.13E-15 | -2.63127 | 1 | 1 KRT78        | K07605 |
| ENSG00000170426 | 5.13E-15 | -2.63127 | 1 | 1 SDR9C7       | K11154 |
| ENSG00000170430 | 5.13E-15 | -2.63127 | 1 | 1 MGMT         | K00567 |

|                 |          |          |   |               |        |
|-----------------|----------|----------|---|---------------|--------|
| ENSG00000170439 | 5.13E-15 | -2.63127 | 1 | 1 METTL7B     | -      |
| ENSG00000170465 | 5.13E-15 | -2.63127 | 1 | 1 KRT6C       | K07605 |
| ENSG00000170484 | 5.13E-15 | -2.63127 | 1 | 1 KRT74       | K07605 |
| ENSG00000170486 | 5.13E-15 | -2.63127 | 1 | 1 KRT72       | K07605 |
| ENSG00000170500 | 5.13E-15 | -2.63127 | 1 | 1 LONRF2      | K17985 |
| ENSG00000170516 | 5.13E-15 | -2.63127 | 1 | 1 COX7B2      | K02271 |
| ENSG00000170542 | 5.13E-15 | -2.63127 | 1 | 1 SERPINB9    | K13963 |
| ENSG00000170549 | 5.13E-15 | -2.63127 | 1 | 1 IRX1        | K04947 |
| ENSG00000170558 | 5.13E-15 | -2.63127 | 1 | 1 CDH2        | K06736 |
| ENSG00000170561 | 5.13E-15 | -2.63127 | 1 | 1 IRX2        | -      |
| ENSG00000170571 | 5.13E-15 | -2.63127 | 1 | 1 EMB         | -      |
| ENSG00000170590 | 5.13E-15 | -2.63127 | 1 | 1 LINC00266-3 | -      |
| ENSG00000170605 | 5.13E-15 | -2.63127 | 1 | 1 OR9K2       | K04257 |
| ENSG00000170608 | 5.13E-15 | -2.63127 | 1 | 1 FOXA3       | K08038 |
| ENSG00000170613 | 5.13E-15 | -2.63127 | 1 | 1 FAM71B      | -      |
| ENSG00000170616 | 5.13E-15 | -2.63127 | 1 | 1 SCRT1       | K09219 |
| ENSG00000170624 | 5.13E-15 | -2.63127 | 1 | 1 SGCD        | K12563 |
| ENSG00000170683 | 5.13E-15 | -2.63127 | 1 | 1 OR10A3      | K04257 |
| ENSG00000170688 | 5.13E-15 | -2.63127 | 1 | 1 OR5E1P      | K04257 |
| ENSG00000170743 | 5.13E-15 | -2.63127 | 1 | 1 SYT9        | -      |
| ENSG00000170745 | 5.13E-15 | -2.63127 | 1 | 1 KCNS3       | K04933 |
| ENSG00000170777 | 5.13E-15 | -2.63127 | 1 | 1 TPD52L3     | -      |
| ENSG00000170782 | 5.13E-15 | -2.63127 | 1 | 1 OR10A4      | K04257 |
| ENSG00000170788 | 5.13E-15 | -2.63127 | 1 | 1 DYDC1       | K09654 |
| ENSG00000170790 | 5.13E-15 | -2.63127 | 1 | 1 OR10A2      | K04257 |
| ENSG00000170803 | 5.13E-15 | -2.63127 | 1 | 1 OR2AG1      | K04257 |
| ENSG00000170807 | 5.13E-15 | -2.63127 | 1 | 1 LMOD2       | -      |
| ENSG00000170819 | 5.13E-15 | -2.63127 | 1 | 1 BFSP2       | K10379 |
| ENSG00000170820 | 5.13E-15 | -2.63127 | 1 | 1 FSHR        | K04247 |
| ENSG00000170827 | 5.13E-15 | -2.63127 | 1 | 1 CELP        | K12298 |
| ENSG00000170837 | 5.13E-15 | -2.63127 | 1 | 1 GPR27       | K04301 |
| ENSG00000170858 | 5.13E-15 | -2.63127 | 1 | 1 LILRP2      | K06512 |
| ENSG00000170866 | 5.13E-15 | -2.63127 | 1 | 1 LILRA3      | K06512 |
| ENSG00000170889 | 5.13E-15 | -2.63127 | 1 | 1 RPS9        | K02997 |
| ENSG00000170890 | 5.13E-15 | -2.63127 | 1 | 1 PLA2G1B     | K01047 |
| ENSG00000170891 | 5.13E-15 | -2.63127 | 1 | 1 CYTL1       | -      |
| ENSG00000170892 | 5.13E-15 | -2.63127 | 1 | 1 TSEN34      | K15323 |
| ENSG00000170893 | 5.13E-15 | -2.63127 | 1 | 1 TRH         | K05253 |
| ENSG00000170906 | 5.13E-15 | -2.63127 | 1 | 1 NDUFA3      | K03947 |
| ENSG00000170909 | 5.13E-15 | -2.63127 | 1 | 1 OSCAR       | K14377 |
| ENSG00000170920 | 5.13E-15 | -2.63127 | 1 | 1 OR7G3       | K04257 |
| ENSG00000170923 | 5.13E-15 | -2.63127 | 1 | 1 OR7G2       | K04257 |
| ENSG00000170925 | 5.13E-15 | -2.63127 | 1 | 1 TEX13B      | -      |
| ENSG00000170929 | 5.13E-15 | -2.63127 | 1 | 1 OR1M1       | K04257 |
| ENSG00000170948 | 5.13E-15 | -2.63127 | 1 | 1 MBD3L1      | -      |
| ENSG00000170950 | 5.13E-15 | -2.63127 | 1 | 1 PGK2        | K00927 |
| ENSG00000170953 | 5.13E-15 | -2.63127 | 1 | 1 OR8B12      | K04257 |
| ENSG00000170954 | 5.13E-15 | -2.63127 | 1 | 1 ZNF415      | K09228 |
| ENSG00000170956 | 5.13E-15 | -2.63127 | 1 | 1 CEACAM3     | K06499 |
| ENSG00000170959 | 5.13E-15 | -2.63127 | 1 | 1 DCDC1       | -      |
| ENSG00000170967 | 5.13E-15 | -2.63127 | 1 | 1 DDI1        | K11885 |
| ENSG00000170983 | 5.13E-15 | -2.63127 | 1 | 1 LINC00208   | -      |
| ENSG00000170989 | 5.13E-15 | -2.63127 | 1 | 1 S1PR1       | K04288 |
| ENSG00000171004 | 5.13E-15 | -2.63127 | 1 | 1 HS6ST2      | K08102 |
| ENSG00000171014 | 5.13E-15 | -2.63127 | 1 | 1 OR4D5       | K04257 |
| ENSG00000171033 | 5.13E-15 | -2.63127 | 1 | 1 PKIA        | K15985 |
| ENSG00000171044 | 5.13E-15 | -2.63127 | 1 | 1 XKR6        | -      |
| ENSG00000171049 | 5.13E-15 | -2.63127 | 1 | 1 FPR2        | K04173 |

|                 |          |          |   |              |        |
|-----------------|----------|----------|---|--------------|--------|
| ENSG00000171053 | 5.13E-15 | -2.63127 | 1 | 1 PATE1      | -      |
| ENSG00000171054 | 5.13E-15 | -2.63127 | 1 | 1 OR13H1     | K04257 |
| ENSG00000171056 | 5.13E-15 | -2.63127 | 1 | 1 SOX7       | K09270 |
| ENSG00000171094 | 5.13E-15 | -2.63127 | 1 | 1 ALK        | K05119 |
| ENSG00000171101 | 5.13E-15 | -2.63127 | 1 | 1 SIGLEC17P  | K06473 |
| ENSG00000171102 | 5.13E-15 | -2.63127 | 1 | 1 OBP2B      | -      |
| ENSG00000171116 | 5.13E-15 | -2.63127 | 1 | 1 HSFY1      | -      |
| ENSG00000171124 | 5.13E-15 | -2.63127 | 1 | 1 FUT3       | K00716 |
| ENSG00000171129 | 5.13E-15 | -2.63127 | 1 | 1 HSFY2      | -      |
| ENSG00000171130 | 5.13E-15 | -2.63127 | 1 | 1 ATP6V0E2   | K02153 |
| ENSG00000171133 | 5.13E-15 | -2.63127 | 1 | 1 OR2K2      | K04257 |
| ENSG00000171136 | 5.13E-15 | -2.63127 | 1 | 1 RLN3       | K05255 |
| ENSG00000171180 | 5.13E-15 | -2.63127 | 1 | 1 OR2M4      | K04257 |
| ENSG00000171195 | 5.13E-15 | -2.63127 | 1 | 1 MUC7       | K13909 |
| ENSG00000171199 | 5.13E-15 | -2.63127 | 1 | 1 PROL1      | -      |
| ENSG00000171201 | 5.13E-15 | -2.63127 | 1 | 1 SMR3B      | -      |
| ENSG00000171209 | 5.13E-15 | -2.63127 | 1 | 1 CSN3       | K17282 |
| ENSG00000171234 | 5.13E-15 | -2.63127 | 1 | 1 UGT2B7     | K00699 |
| ENSG00000171243 | 5.13E-15 | -2.63127 | 1 | 1 SOSTDC1    | -      |
| ENSG00000171360 | 5.13E-15 | -2.63127 | 1 | 1 KRT38      | K07604 |
| ENSG00000171396 | 5.13E-15 | -2.63127 | 1 | 1 KRTAP4-4   | -      |
| ENSG00000171402 | 5.13E-15 | -2.63127 | 1 | 1 XAGE3      | -      |
| ENSG00000171405 | 5.13E-15 | -2.63127 | 1 | 1 XAGE5      | -      |
| ENSG00000171431 | 5.13E-15 | -2.63127 | 1 | 1 KRT20      | K07604 |
| ENSG00000171433 | 5.13E-15 | -2.63127 | 1 | 1 GLOD5      | -      |
| ENSG00000171435 | 5.13E-15 | -2.63127 | 1 | 1 KSR2       | K18529 |
| ENSG00000171446 | 5.13E-15 | -2.63127 | 1 | 1 KRT27      | K07604 |
| ENSG00000171459 | 5.13E-15 | -2.63127 | 1 | 1 OR1L6      | K04257 |
| ENSG00000171476 | 5.13E-15 | -2.63127 | 1 | 1 HOPX       | -      |
| ENSG00000171478 | 5.13E-15 | -2.63127 | 1 | 1 SPACA5B    | K01185 |
| ENSG00000171481 | 5.13E-15 | -2.63127 | 1 | 1 OR1L3      | K04257 |
| ENSG00000171483 | 5.13E-15 | -2.63127 | 1 | 1 SSX6       | K15624 |
| ENSG00000171484 | 5.13E-15 | -2.63127 | 1 | 1 OR1B1      | K04257 |
| ENSG00000171487 | 5.13E-15 | -2.63127 | 1 | 1 NLRP5      | -      |
| ENSG00000171488 | 5.13E-15 | -2.63127 | 1 | 1 LRRC8C     | -      |
| ENSG00000171489 | 5.13E-15 | -2.63127 | 1 | 1 SPACA5     | K01185 |
| ENSG00000171495 | 5.13E-15 | -2.63127 | 1 | 1 MROH2B     | -      |
| ENSG00000171496 | 5.13E-15 | -2.63127 | 1 | 1 OR1L8      | K04257 |
| ENSG00000171501 | 5.13E-15 | -2.63127 | 1 | 1 OR1N2      | K04257 |
| ENSG00000171505 | 5.13E-15 | -2.63127 | 1 | 1 OR1N1      | K04257 |
| ENSG00000171517 | 5.13E-15 | -2.63127 | 1 | 1 LPAR3      | K04294 |
| ENSG00000171540 | 5.13E-15 | -2.63127 | 1 | 1 OTP        | -      |
| ENSG00000171561 | 5.13E-15 | -2.63127 | 1 | 1 OR2AT4     | K04257 |
| ENSG00000171564 | 5.13E-15 | -2.63127 | 1 | 1 FGB        | K03904 |
| ENSG00000171587 | 5.13E-15 | -2.63127 | 1 | 1 DSCAM      | K06767 |
| ENSG00000171595 | 5.13E-15 | -2.63127 | 1 | 1 DNAI2      | K11143 |
| ENSG00000171596 | 5.13E-15 | -2.63127 | 1 | 1 NMUR1      | K05052 |
| ENSG00000171611 | 5.13E-15 | -2.63127 | 1 | 1 PTCRA      | K06056 |
| ENSG00000171643 | 5.13E-15 | -2.63127 | 1 | 1 S100Z      | -      |
| ENSG00000171671 | 5.13E-15 | -2.63127 | 1 | 1 SHANK2-AS3 | -      |
| ENSG00000171695 | 5.13E-15 | -2.63127 | 1 | 1 C20orf201  | -      |
| ENSG00000171711 | 5.13E-15 | -2.63127 | 1 | 1 DEFB4A     | -      |
| ENSG00000171714 | 5.13E-15 | -2.63127 | 1 | 1 ANO5       | K19480 |
| ENSG00000171722 | 5.13E-15 | -2.63127 | 1 | 1 C1orf111   | -      |
| ENSG00000171724 | 5.13E-15 | -2.63127 | 1 | 1 VAT1L      | -      |
| ENSG00000171759 | 5.13E-15 | -2.63127 | 1 | 1 PAH        | K09067 |
| ENSG00000171772 | 5.13E-15 | -2.63127 | 1 | 1 SYCE1      | K19534 |
| ENSG00000171773 | 5.13E-15 | -2.63127 | 1 | 1 NXNLI      | -      |

|                 |          |          |   |              |        |
|-----------------|----------|----------|---|--------------|--------|
| ENSG00000171777 | 5.13E-15 | -2.63127 | 1 | 1 RASGRP4    | K12363 |
| ENSG00000171794 | 5.13E-15 | -2.63127 | 1 | 1 UTF1       | -      |
| ENSG00000171804 | 5.13E-15 | -2.63127 | 1 | 1 WDR87      | -      |
| ENSG00000171811 | 5.13E-15 | -2.63127 | 1 | 1 TTC40      | -      |
| ENSG00000171815 | 5.13E-15 | -2.63127 | 1 | 1 PCDHB1     | K16494 |
| ENSG00000171819 | 5.13E-15 | -2.63127 | 1 | 1 ANGPTL7    | -      |
| ENSG00000171864 | 5.13E-15 | -2.63127 | 1 | 1 PRND       | K17985 |
| ENSG00000171885 | 5.13E-15 | -2.63127 | 1 | 1 AQP4       | K09866 |
| ENSG00000171903 | 5.13E-15 | -2.63127 | 1 | 1 CYP4F11    | K17729 |
| ENSG00000171936 | 5.13E-15 | -2.63127 | 1 | 1 OR10H3     | K04257 |
| ENSG00000171942 | 5.13E-15 | -2.63127 | 1 | 1 OR10H2     | K04257 |
| ENSG00000171944 | 5.13E-15 | -2.63127 | 1 | 1 OR52A5     | K04257 |
| ENSG00000171954 | 5.13E-15 | -2.63127 | 1 | 1 CYP4F22    | K17731 |
| ENSG00000171987 | 5.13E-15 | -2.63127 | 1 | 1 C11orf40   | -      |
| ENSG00000171989 | 5.13E-15 | -2.63127 | 1 | 1 LDHAL6B    | K00016 |
| ENSG00000171999 | 5.13E-15 | -2.63127 | 1 | 1 OR52P2P    | K04257 |
| ENSG00000172014 | 5.13E-15 | -2.63127 | 1 | 1 ANKRD20A4  | K17299 |
| ENSG00000172016 | 5.13E-15 | -2.63127 | 1 | 1 REG3A      | -      |
| ENSG00000172020 | 5.13E-15 | -2.63127 | 1 | 1 GAP43      | -      |
| ENSG00000172023 | 5.13E-15 | -2.63127 | 1 | 1 REG1B      | -      |
| ENSG00000172031 | 5.13E-15 | -2.63127 | 1 | 1 EPHX4      | K12581 |
| ENSG00000172116 | 5.13E-15 | -2.63127 | 1 | 1 CD8B       | K06459 |
| ENSG00000172137 | 5.13E-15 | -2.63127 | 1 | 1 CALB2      | -      |
| ENSG00000172146 | 5.13E-15 | -2.63127 | 1 | 1 OR1A1      | K04257 |
| ENSG00000172148 | 5.13E-15 | -2.63127 | 1 | 1 AC005255.6 | K04257 |
| ENSG00000172150 | 5.13E-15 | -2.63127 | 1 | 1 OR1A2      | K04257 |
| ENSG00000172154 | 5.13E-15 | -2.63127 | 1 | 1 OR8I2      | K04257 |
| ENSG00000172155 | 5.13E-15 | -2.63127 | 1 | 1 LCE1D      | -      |
| ENSG00000172156 | 5.13E-15 | -2.63127 | 1 | 1 CCL11      | K16597 |
| ENSG00000172179 | 5.13E-15 | -2.63127 | 1 | 1 PRL        | K05439 |
| ENSG00000172186 | 5.13E-15 | -2.63127 | 1 | 1 HMGN1P35   | K11299 |
| ENSG00000172188 | 5.13E-15 | -2.63127 | 1 | 1 OR4C11     | K04257 |
| ENSG00000172199 | 5.13E-15 | -2.63127 | 1 | 1 OR8U1      | K04257 |
| ENSG00000172201 | 5.13E-15 | -2.63127 | 1 | 1 ID4        | K17695 |
| ENSG00000172208 | 5.13E-15 | -2.63127 | 1 | 1 OR4X2      | K04257 |
| ENSG00000172209 | 5.13E-15 | -2.63127 | 1 | 1 GPR22      | K04319 |
| ENSG00000172236 | 5.13E-15 | -2.63127 | 1 | 1 TPSAB1     | K01340 |
| ENSG00000172238 | 5.13E-15 | -2.63127 | 1 | 1 ATOH1      | K09083 |
| ENSG00000172283 | 5.13E-15 | -2.63127 | 1 | 1 PRYP4      | -      |
| ENSG00000172288 | 5.13E-15 | -2.63127 | 1 | 1 CDY1       | K00653 |
| ENSG00000172289 | 5.13E-15 | -2.63127 | 1 | 1 OR10V1     | K04257 |
| ENSG00000172292 | 5.13E-15 | -2.63127 | 1 | 1 CERS6      | K04710 |
| ENSG00000172294 | 5.13E-15 | -2.63127 | 1 | 1 CSPG4P4Y   | K08115 |
| ENSG00000172297 | 5.13E-15 | -2.63127 | 1 | 1 GOLGA2P3Y  | -      |
| ENSG00000172318 | 5.13E-15 | -2.63127 | 1 | 1 B3GALT1    | K07819 |
| ENSG00000172320 | 5.13E-15 | -2.63127 | 1 | 1 OR5A1      | K04257 |
| ENSG00000172322 | 5.13E-15 | -2.63127 | 1 | 1 CLEC12A    | K17516 |
| ENSG00000172324 | 5.13E-15 | -2.63127 | 1 | 1 OR5A2      | K04257 |
| ENSG00000172332 | 5.13E-15 | -2.63127 | 1 | 1 AC012005.2 | -      |
| ENSG00000172342 | 5.13E-15 | -2.63127 | 1 | 1 CSPG4P3Y   | K08115 |
| ENSG00000172348 | 5.13E-15 | -2.63127 | 1 | 1 RCAN2      | K17903 |
| ENSG00000172352 | 5.13E-15 | -2.63127 | 1 | 1 CDY1B      | K00653 |
| ENSG00000172362 | 5.13E-15 | -2.63127 | 1 | 1 OR5B12     | K04257 |
| ENSG00000172365 | 5.13E-15 | -2.63127 | 1 | 1 OR5B2      | K04257 |
| ENSG00000172377 | 5.13E-15 | -2.63127 | 1 | 1 OR9I1      | K04257 |
| ENSG00000172381 | 5.13E-15 | -2.63127 | 1 | 1 OR6Q1      | K04257 |
| ENSG00000172399 | 5.13E-15 | -2.63127 | 1 | 1 MYOZ2      | -      |
| ENSG00000172410 | 5.13E-15 | -2.63127 | 1 | 1 INSL5      | K05255 |

|                 |          |          |   |                 |              |
|-----------------|----------|----------|---|-----------------|--------------|
| ENSG00000172421 | 5.13E-15 | -2.63127 | 1 | 1 EFCAB3        | -            |
| ENSG00000172425 | 5.13E-15 | -2.63127 | 1 | 1 TTC36         | -            |
| ENSG00000172457 | 5.13E-15 | -2.63127 | 1 | 1 OR9G4         | K04257       |
| ENSG00000172459 | 5.13E-15 | -2.63127 | 1 | 1 OR5AR1        | K04257       |
| ENSG00000172461 | 5.13E-15 | -2.63127 | 1 | 1 FUT9          | K03663       |
| ENSG00000172464 | 5.13E-15 | -2.63127 | 1 | 1 OR5AP2        | K04257       |
| ENSG00000172468 | 5.13E-15 | -2.63127 | 1 | 1 HSFY1         | -            |
| ENSG00000172487 | 5.13E-15 | -2.63127 | 1 | 1 OR8J1         | K04257       |
| ENSG00000172489 | 5.13E-15 | -2.63127 | 1 | 1 OR5T3         | K04257       |
| ENSG00000172497 | 5.13E-15 | -2.63127 | 1 | 1 ACOT12        | K01067       |
| ENSG00000172519 | 5.13E-15 | -2.63127 | 1 | 1 OR10H5        | K04257       |
| ENSG00000172538 | 5.13E-15 | -2.63127 | 1 | 1 FAM170B       | -            |
| ENSG00000172548 | 5.13E-15 | -2.63127 | 1 | 1 NIPAL4        | -            |
| ENSG00000172551 | 5.13E-15 | -2.63127 | 1 | 1 MUCL1         | -            |
| ENSG00000172554 | 5.13E-15 | -2.63127 | 1 | 1 SNTG2         | K14209       |
| ENSG00000172568 | 5.13E-15 | -2.63127 | 1 | 1 FNDC9         | -            |
| ENSG00000172578 | 5.13E-15 | -2.63127 | 1 | 1 KLHL6         | K10444       |
| ENSG00000172640 | 5.13E-15 | -2.63127 | 1 | 1 OR10AD1       | K04257       |
| ENSG00000172653 | 5.13E-15 | -2.63127 | 1 | 1 C17orf66      | -            |
| ENSG00000172673 | 5.13E-15 | -2.63127 | 1 | 1 THEMIS        | -            |
| ENSG00000172680 | 5.13E-15 | -2.63127 | 1 | 1 MOS           | K04367       |
| ENSG00000172689 | 5.13E-15 | -2.63127 | 1 | 1 MS4A10        | K12581       |
| ENSG00000172716 | 5.13E-15 | -2.63127 | 1 | 1 SLFN11        | -            |
| ENSG00000172724 | 5.13E-15 | -2.63127 | 1 | 1 CCL19         | K05512       |
| ENSG00000172733 | 5.13E-15 | -2.63127 | 1 | 1 PURG          | -            |
| ENSG00000172742 | 5.13E-15 | -2.63127 | 1 | 1 OR4D9         | K04257       |
| ENSG00000172746 | 5.13E-15 | -2.63127 | 1 | 1 RP11-344H11.4 | K02870       |
| ENSG00000172769 | 5.13E-15 | -2.63127 | 1 | 1 OR5B3         | K04257       |
| ENSG00000172772 | 5.13E-15 | -2.63127 | 1 | 1 OR10W1        | K04257       |
| ENSG00000172774 | 5.13E-15 | -2.63127 | 1 | 1 OR1S1         | K04257       |
| ENSG00000172782 | 5.13E-15 | -2.63127 | 1 | 1 FADS6         | K12419       |
| ENSG00000172794 | 5.13E-15 | -2.63127 | 1 | 1 RAB37         | K07914       |
| ENSG00000172799 | 5.13E-15 | -2.63127 | 1 | 1 ZBTB8OSP2     | -            |
| ENSG00000172817 | 5.13E-15 | -2.63127 | 1 | 1 CYP7B1        | K07430       |
| ENSG00000172824 | 5.13E-15 | -2.63127 | 1 | 1 CES4A         | -            |
| ENSG00000172867 | 5.13E-15 | -2.63127 | 1 | 1 KRT2          | K07605       |
| ENSG00000172900 | 5.13E-15 | -2.63127 | 1 | 1 AP002387.1    | -            |
| ENSG00000172912 | 5.13E-15 | -2.63127 | 1 | 1 COX6B1P3      | K02267       |
| ENSG00000172915 | 5.13E-15 | -2.63127 | 1 | 1 NBEA          | -            |
| ENSG00000172935 | 5.13E-15 | -2.63127 | 1 | 1 MRGPRF        | K08394       |
| ENSG00000172938 | 5.13E-15 | -2.63127 | 1 | 1 MRGPRD        | K08392       |
| ENSG00000172940 | 5.13E-15 | -2.63127 | 1 | 1 SLC22A13      | K08209       |
| ENSG00000172969 | 5.13E-15 | -2.63127 | 1 | 1 FRG2C         | K19328       |
| ENSG00000172971 | 5.13E-15 | -2.63127 | 1 | 1 UNC93B3       | K04257       |
| ENSG00000172987 | 5.13E-15 | -2.63127 | 1 | 1 HPSE2         | K07965       |
| ENSG00000172995 | 5.13E-15 | -2.63127 | 1 | 1 ARPP21        | -            |
| ENSG00000173040 | 5.13E-15 | -2.63127 | 1 | 1 EVC2          | K19608       |
| ENSG00000173077 | 5.13E-15 | -2.63127 | 1 | 1               | 1-Dec K11447 |
| ENSG00000173093 | 5.13E-15 | -2.63127 | 1 | 1 CCDC63        | -            |
| ENSG00000173157 | 5.13E-15 | -2.63127 | 1 | 1 ADAMTS20      | K09609       |
| ENSG00000173200 | 5.13E-15 | -2.63127 | 1 | 1 PARP15        | K15261       |
| ENSG00000173208 | 5.13E-15 | -2.63127 | 1 | 1 ABCD2         | K05676       |
| ENSG00000173210 | 5.13E-15 | -2.63127 | 1 | 1 ABLIM3        | K07520       |
| ENSG00000173213 | 5.13E-15 | -2.63127 | 1 | 1 RP11-683L23.1 | K07375       |
| ENSG00000173231 | 5.13E-15 | -2.63127 | 1 | 1 TERF1P1       | K11110       |
| ENSG00000173239 | 5.13E-15 | -2.63127 | 1 | 1 LIPM          | K19406       |
| ENSG00000173250 | 5.13E-15 | -2.63127 | 1 | 1 GPR151        | K08435       |
| ENSG00000173253 | 5.13E-15 | -2.63127 | 1 | 1 DMRT2         | K19489       |

|                 |          |          |   |                 |        |
|-----------------|----------|----------|---|-----------------|--------|
| ENSG00000173285 | 5.13E-15 | -2.63127 | 1 | 1 OR10K1        | K04257 |
| ENSG00000173302 | 5.13E-15 | -2.63127 | 1 | 1 GPR148        | K08432 |
| ENSG00000173335 | 5.13E-15 | -2.63127 | 1 | 1 CST9          | K13905 |
| ENSG00000173349 | 5.13E-15 | -2.63127 | 1 | 1 SFT2D3        | -      |
| ENSG00000173357 | 5.13E-15 | -2.63127 | 1 | 1 AC007967.3    | K12885 |
| ENSG00000173366 | 5.13E-15 | -2.63127 | 1 | 1 TLR9          | K10161 |
| ENSG00000173369 | 5.13E-15 | -2.63127 | 1 | 1 C1QB          | K03987 |
| ENSG00000173372 | 5.13E-15 | -2.63127 | 1 | 1 C1QA          | K03986 |
| ENSG00000173376 | 5.13E-15 | -2.63127 | 1 | 1 NDNF          | -      |
| ENSG00000173389 | 5.13E-15 | -2.63127 | 1 | 1 IQCF1         | -      |
| ENSG00000173404 | 5.13E-15 | -2.63127 | 1 | 1 INSM1         | -      |
| ENSG00000173406 | 5.13E-15 | -2.63127 | 1 | 1 DAB1          | -      |
| ENSG00000173431 | 5.13E-15 | -2.63127 | 1 | 1 RNASE8        | K01172 |
| ENSG00000173452 | 5.13E-15 | -2.63127 | 1 | 1 TMEM196       | -      |
| ENSG00000173464 | 5.13E-15 | -2.63127 | 1 | 1 RNASE11       | K16633 |
| ENSG00000173467 | 5.13E-15 | -2.63127 | 1 | 1 AGR3          | -      |
| ENSG00000173530 | 5.13E-15 | -2.63127 | 1 | 1 TNFRSF10D     | K04722 |
| ENSG00000173557 | 5.13E-15 | -2.63127 | 1 | 1 C2orf70       | -      |
| ENSG00000173572 | 5.13E-15 | -2.63127 | 1 | 1 NLRP13        | -      |
| ENSG00000173578 | 5.13E-15 | -2.63127 | 1 | 1 XCR1          | K04193 |
| ENSG00000173585 | 5.13E-15 | -2.63127 | 1 | 1 CCR9          | K04184 |
| ENSG00000173597 | 5.13E-15 | -2.63127 | 1 | 1 SULT1B1       | K01025 |
| ENSG00000173610 | 5.13E-15 | -2.63127 | 1 | 1 UGT2A1        | K00699 |
| ENSG00000173612 | 5.13E-15 | -2.63127 | 1 | 1 GPRC6A        | K04622 |
| ENSG00000173627 | 5.13E-15 | -2.63127 | 1 | 1 APOBEC4       | K18773 |
| ENSG00000173679 | 5.13E-15 | -2.63127 | 1 | 1 OR1L1         | K04257 |
| ENSG00000173699 | 5.13E-15 | -2.63127 | 1 | 1 SPATA3        | -      |
| ENSG00000173714 | 5.13E-15 | -2.63127 | 1 | 1 WFIKKN2       | -      |
| ENSG00000173769 | 5.13E-15 | -2.63127 | 1 | 1 TOPAZ1        | -      |
| ENSG00000173805 | 5.13E-15 | -2.63127 | 1 | 1 HAP1          | K04647 |
| ENSG00000173810 | 5.13E-15 | -2.63127 | 1 | 1 PPIAP7        | K03767 |
| ENSG00000173862 | 5.13E-15 | -2.63127 | 1 | 1 RP11-89N17.1  | -      |
| ENSG00000173876 | 5.13E-15 | -2.63127 | 1 | 1 TUBB8         | K07375 |
| ENSG00000173908 | 5.13E-15 | -2.63127 | 1 | 1 KRT28         | K07604 |
| ENSG00000173930 | 5.13E-15 | -2.63127 | 1 | 1 SLCO4C1       | K14355 |
| ENSG00000173947 | 5.13E-15 | -2.63127 | 1 | 1 PIFO          | -      |
| ENSG00000173954 | 5.13E-15 | -2.63127 | 1 | 1 SNURFL        | -      |
| ENSG00000173966 | 5.13E-15 | -2.63127 | 1 | 1 RP11-18M17.1  | -      |
| ENSG00000173976 | 5.13E-15 | -2.63127 | 1 | 1 RAX2          | K09333 |
| ENSG00000173988 | 5.13E-15 | -2.63127 | 1 | 1 LRRC63        | -      |
| ENSG00000174015 | 5.13E-15 | -2.63127 | 1 | 1 SPERT         | -      |
| ENSG00000174016 | 5.13E-15 | -2.63127 | 1 | 1 FAM46D        | -      |
| ENSG00000174059 | 5.13E-15 | -2.63127 | 1 | 1 CD34          | K06474 |
| ENSG00000174083 | 5.13E-15 | -2.63127 | 1 | 1 PIK3R6        | -      |
| ENSG00000174100 | 5.13E-15 | -2.63127 | 1 | 1 MRPL45        | K17426 |
| ENSG00000174123 | 5.13E-15 | -2.63127 | 1 | 1 TLR10         | K10171 |
| ENSG00000174145 | 5.13E-15 | -2.63127 | 1 | 1 KIAA1239      | -      |
| ENSG00000174156 | 5.13E-15 | -2.63127 | 1 | 1 GSTA3         | K00799 |
| ENSG00000174175 | 5.13E-15 | -2.63127 | 1 | 1 SELP          | K06496 |
| ENSG00000174226 | 5.13E-15 | -2.63127 | 1 | 1 SNX31         | K17937 |
| ENSG00000174255 | 5.13E-15 | -2.63127 | 1 | 1 ZNF80         | K09228 |
| ENSG00000174279 | 5.13E-15 | -2.63127 | 1 | 1 EVX2          | K09320 |
| ENSG00000174325 | 5.13E-15 | -2.63127 | 1 | 1 DIRC1         | -      |
| ENSG00000174339 | 5.13E-15 | -2.63127 | 1 | 1 OR2Y1         | K04257 |
| ENSG00000174348 | 5.13E-15 | -2.63127 | 1 | 1 PODN          | K11447 |
| ENSG00000174368 | 5.13E-15 | -2.63127 | 1 | 1 PMS2P2        | K10858 |
| ENSG00000174370 | 5.13E-15 | -2.63127 | 1 | 1 C11orf45      | K04995 |
| ENSG00000174384 | 5.13E-15 | -2.63127 | 1 | 1 RP11-313P13.4 | K10858 |

|                 |          |          |   |                 |        |
|-----------------|----------|----------|---|-----------------|--------|
| ENSG00000174403 | 5.13E-15 | -2.63127 | 1 | 1 C20orf166-AS1 | -      |
| ENSG00000174407 | 5.13E-15 | -2.63127 | 1 | 1 C20orf166     | -      |
| ENSG00000174408 | 5.13E-15 | -2.63127 | 1 | 1 PPIAP24       | K03767 |
| ENSG00000174417 | 5.13E-15 | -2.63127 | 1 | 1 TRHR          | K04282 |
| ENSG00000174418 | 5.13E-15 | -2.63127 | 1 | 1 RPL35P9       | K02918 |
| ENSG00000174429 | 5.13E-15 | -2.63127 | 1 | 1 ABRA          | -      |
| ENSG00000174450 | 5.13E-15 | -2.63127 | 1 | 1 GOLGA6L2      | -      |
| ENSG00000174453 | 5.13E-15 | -2.63127 | 1 | 1 VWC2L         | -      |
| ENSG00000174460 | 5.13E-15 | -2.63127 | 1 | 1 ZCCHC12       | -      |
| ENSG00000174469 | 5.13E-15 | -2.63127 | 1 | 1 CNTNAP2       | K07380 |
| ENSG00000174495 | 5.13E-15 | -2.63127 | 1 | 1 AC005017.2    | K03767 |
| ENSG00000174567 | 5.13E-15 | -2.63127 | 1 | 1 GOLT1A        | -      |
| ENSG00000174572 | 5.13E-15 | -2.63127 | 1 | 1 RP11-209A2.1  | K02866 |
| ENSG00000174599 | 5.13E-15 | -2.63127 | 1 | 1 TRAM1L1       | K14010 |
| ENSG00000174600 | 5.13E-15 | -2.63127 | 1 | 1 CMKLR1        | K04245 |
| ENSG00000174611 | 5.13E-15 | -2.63127 | 1 | 1 KY            | -      |
| ENSG00000174667 | 5.13E-15 | -2.63127 | 1 | 1 OR7D4         | K04257 |
| ENSG00000174677 | 5.13E-15 | -2.63127 | 1 | 1 VN1R6P        | K04614 |
| ENSG00000174678 | 5.13E-15 | -2.63127 | 1 | 1 FAM47DP       | -      |
| ENSG00000174680 | 5.13E-15 | -2.63127 | 1 | 1 GRIK1-AS1     | -      |
| ENSG00000174697 | 5.13E-15 | -2.63127 | 1 | 1 LEP           | K05424 |
| ENSG00000174740 | 5.13E-15 | -2.63127 | 1 | 1 PABPC5        | K13126 |
| ENSG00000174776 | 5.13E-15 | -2.63127 | 1 | 1 WDR49         | -      |
| ENSG00000174792 | 5.13E-15 | -2.63127 | 1 | 1 C4orf26       | K09228 |
| ENSG00000174808 | 5.13E-15 | -2.63127 | 1 | 1 BTC           | K09783 |
| ENSG00000174876 | 5.13E-15 | -2.63127 | 1 | 1 AMY1B         | K01176 |
| ENSG00000174899 | 5.13E-15 | -2.63127 | 1 | 1 C3orf55       | -      |
| ENSG00000174914 | 5.13E-15 | -2.63127 | 1 | 1 OR9G1         | K04257 |
| ENSG00000174930 | 5.13E-15 | -2.63127 | 1 | 1 VN2R1P        | K04613 |
| ENSG00000174937 | 5.13E-15 | -2.63127 | 1 | 1 OR5M3         | K04257 |
| ENSG00000174942 | 5.13E-15 | -2.63127 | 1 | 1 OR5R1         | K04257 |
| ENSG00000174944 | 5.13E-15 | -2.63127 | 1 | 1 P2RY14        | K04299 |
| ENSG00000174946 | 5.13E-15 | -2.63127 | 1 | 1 GPR171        | K08441 |
| ENSG00000174948 | 5.13E-15 | -2.63127 | 1 | 1 GPR149        | K08433 |
| ENSG00000174950 | 5.13E-15 | -2.63127 | 1 | 1 CD164L2       | K10104 |
| ENSG00000174957 | 5.13E-15 | -2.63127 | 1 | 1 OR5J2         | K04257 |
| ENSG00000174963 | 5.13E-15 | -2.63127 | 1 | 1 ZIC4          | K09225 |
| ENSG00000174970 | 5.13E-15 | -2.63127 | 1 | 1 OR10AG1       | K04257 |
| ENSG00000174982 | 5.13E-15 | -2.63127 | 1 | 1 OR4S2         | K04257 |
| ENSG00000175040 | 5.13E-15 | -2.63127 | 1 | 1 CHST2         | K04745 |
| ENSG00000175065 | 5.13E-15 | -2.63127 | 1 | 1 DSG4          | K07599 |
| ENSG00000175093 | 5.13E-15 | -2.63127 | 1 | 1 SPSB4         | K10343 |
| ENSG00000175097 | 5.13E-15 | -2.63127 | 1 | 1 RAG2          | K10988 |
| ENSG00000175143 | 5.13E-15 | -2.63127 | 1 | 1 OR2T1         | K04257 |
| ENSG00000175161 | 5.13E-15 | -2.63127 | 1 | 1 CADM2         | K06782 |
| ENSG00000175164 | 5.13E-15 | -2.63127 | 1 | 1 ABO           | -      |
| ENSG00000175175 | 5.13E-15 | -2.63127 | 1 | 1 PPM1E         | K17501 |
| ENSG00000175202 | 5.13E-15 | -2.63127 | 1 | 1 HIGD2B        | K18038 |
| ENSG00000175264 | 5.13E-15 | -2.63127 | 1 | 1 CHST1         | K01022 |
| ENSG00000175267 | 5.13E-15 | -2.63127 | 1 | 1 VWA3A         | -      |
| ENSG00000175302 | 5.13E-15 | -2.63127 | 1 | 1 ANKRD30BP1    | -      |
| ENSG00000175311 | 5.13E-15 | -2.63127 | 1 | 1 ANKS4B        | K06115 |
| ENSG00000175319 | 5.13E-15 | -2.63127 | 1 | 1 NF1P5         | K08052 |
| ENSG00000175325 | 5.13E-15 | -2.63127 | 1 | 1 PROP1         | K09327 |
| ENSG00000175329 | 5.13E-15 | -2.63127 | 1 | 1 ISX           | -      |
| ENSG00000175336 | 5.13E-15 | -2.63127 | 1 | 1 APOF          | K17985 |
| ENSG00000175344 | 5.13E-15 | -2.63127 | 1 | 1 CHRNA7        | K04809 |
| ENSG00000175352 | 5.13E-15 | -2.63127 | 1 | 1 NRIP3         | K13215 |

|                 |          |          |   |                   |        |
|-----------------|----------|----------|---|-------------------|--------|
| ENSG00000175393 | 5.13E-15 | -2.63127 | 1 | 1 OR10A6          | K04257 |
| ENSG00000175398 | 5.13E-15 | -2.63127 | 1 | 1 OR10P1          | K04257 |
| ENSG00000175485 | 5.13E-15 | -2.63127 | 1 | 1 OR52W1          | K04257 |
| ENSG00000175489 | 5.13E-15 | -2.63127 | 1 | 1 LRRC25          | K17985 |
| ENSG00000175497 | 5.13E-15 | -2.63127 | 1 | 1 DPP10           | -      |
| ENSG00000175509 | 5.13E-15 | -2.63127 | 1 | 1 RP11-395L14.13  | K01317 |
| ENSG00000175513 | 5.13E-15 | -2.63127 | 1 | 1 TSGA10IP        | -      |
| ENSG00000175514 | 5.13E-15 | -2.63127 | 1 | 1 GPR152          | K08436 |
| ENSG00000175520 | 5.13E-15 | -2.63127 | 1 | 1 UBQLN3          | K04523 |
| ENSG00000175535 | 5.13E-15 | -2.63127 | 1 | 1 PNLIP           | K14073 |
| ENSG00000175544 | 5.13E-15 | -2.63127 | 1 | 1 CABP4           | K08436 |
| ENSG00000175604 | 5.13E-15 | -2.63127 | 1 | 1 RP11-276H1.3    | K06115 |
| ENSG00000175619 | 5.13E-15 | -2.63127 | 1 | 1 OR4B1           | K04257 |
| ENSG00000175646 | 5.13E-15 | -2.63127 | 1 | 1 PRM1            | -      |
| ENSG00000175658 | 5.13E-15 | -2.63127 | 1 | 1 DRD5P2          | K05840 |
| ENSG00000175664 | 5.13E-15 | -2.63127 | 1 | 1 TEX26           | -      |
| ENSG00000175676 | 5.13E-15 | -2.63127 | 1 | 1 GOLGA8EP        | K10595 |
| ENSG00000175699 | 5.13E-15 | -2.63127 | 1 | 1 LINC00521       | -      |
| ENSG00000175707 | 5.13E-15 | -2.63127 | 1 | 1 C1orf172        | -      |
| ENSG00000175718 | 5.13E-15 | -2.63127 | 1 | 1 RBMXL3          | K12885 |
| ENSG00000175728 | 5.13E-15 | -2.63127 | 1 | 1 C11orf44        | K09228 |
| ENSG00000175746 | 5.13E-15 | -2.63127 | 1 | 1 C15orf54        | -      |
| ENSG00000175766 | 5.13E-15 | -2.63127 | 1 | 1 EIF4E1B         | K03259 |
| ENSG00000175779 | 5.13E-15 | -2.63127 | 1 | 1 C15orf53        | -      |
| ENSG00000175785 | 5.13E-15 | -2.63127 | 1 | 1 PRIMA1          | -      |
| ENSG00000175800 | 5.13E-15 | -2.63127 | 1 | 1 OR52B3P         | K04257 |
| ENSG00000175809 | 5.13E-15 | -2.63127 | 1 | 1 ZNF645          | K15714 |
| ENSG00000175827 | 5.13E-15 | -2.63127 | 1 | 1 AP001266.1      | K19022 |
| ENSG00000175857 | 5.13E-15 | -2.63127 | 1 | 1 GAPT            | -      |
| ENSG00000175877 | 5.13E-15 | -2.63127 | 1 | 1 WBSCR28         | -      |
| ENSG00000175893 | 5.13E-15 | -2.63127 | 1 | 1 ZDHHC21         | K18932 |
| ENSG00000175894 | 5.13E-15 | -2.63127 | 1 | 1 TSPEAR          | -      |
| ENSG00000175928 | 5.13E-15 | -2.63127 | 1 | 1 LRRN1           | -      |
| ENSG00000175967 | 5.13E-15 | -2.63127 | 1 | 1 RP11-544L8__B.4 | -      |
| ENSG00000175985 | 5.13E-15 | -2.63127 | 1 | 1 PLEKHD1         | -      |
| ENSG00000176007 | 5.13E-15 | -2.63127 | 1 | 1 FAM220BP        | -      |
| ENSG00000176020 | 5.13E-15 | -2.63127 | 1 | 1 AMIGO3          | K00966 |
| ENSG00000176034 | 5.13E-15 | -2.63127 | 1 | 1 CHDC2           | -      |
| ENSG00000176040 | 5.13E-15 | -2.63127 | 1 | 1 TMPRSS7         | K09638 |
| ENSG00000176043 | 5.13E-15 | -2.63127 | 1 | 1 RP1-146I3.1     | K02920 |
| ENSG00000176049 | 5.13E-15 | -2.63127 | 1 | 1 JAKMIP2         | K12581 |
| ENSG00000176075 | 5.13E-15 | -2.63127 | 1 | 1 LINC00302       | -      |
| ENSG00000176082 | 5.13E-15 | -2.63127 | 1 | 1 AL357153.1      | -      |
| ENSG00000176083 | 5.13E-15 | -2.63127 | 1 | 1 ZNF683          | -      |
| ENSG00000176115 | 5.13E-15 | -2.63127 | 1 | 1 AQP7P4          | K08771 |
| ENSG00000176134 | 5.13E-15 | -2.63127 | 1 | 1 AL445665.1      | K13402 |
| ENSG00000176136 | 5.13E-15 | -2.63127 | 1 | 1 MC5R            | K04203 |
| ENSG00000176160 | 5.13E-15 | -2.63127 | 1 | 1 HSF5            | -      |
| ENSG00000176165 | 5.13E-15 | -2.63127 | 1 | 1 FOXG1           | K09385 |
| ENSG00000176177 | 5.13E-15 | -2.63127 | 1 | 1 ENTHD1          | -      |
| ENSG00000176183 | 5.13E-15 | -2.63127 | 1 | 1 CH17-12M21.1    | K05692 |
| ENSG00000176194 | 5.13E-15 | -2.63127 | 1 | 1 CIDEA           | -      |
| ENSG00000176198 | 5.13E-15 | -2.63127 | 1 | 1 OR11H4          | K04257 |
| ENSG00000176200 | 5.13E-15 | -2.63127 | 1 | 1 OR4D11          | K04257 |
| ENSG00000176204 | 5.13E-15 | -2.63127 | 1 | 1 LRRTM4          | -      |
| ENSG00000176219 | 5.13E-15 | -2.63127 | 1 | 1 OR11H6          | K04257 |
| ENSG00000176227 | 5.13E-15 | -2.63127 | 1 | 1 CTAGE15         | -      |
| ENSG00000176230 | 5.13E-15 | -2.63127 | 1 | 1 OR4K17          | K04257 |



|                 |          |          |   |                 |        |
|-----------------|----------|----------|---|-----------------|--------|
| ENSG00000176231 | 5.13E-15 | -2.63127 | 1 | 1 OR10H4        | K04257 |
| ENSG00000176232 | 5.13E-15 | -2.63127 | 1 | 1 RP5-1193P9.4  | K04614 |
| ENSG00000176239 | 5.13E-15 | -2.63127 | 1 | 1 OR51B6        | K04257 |
| ENSG00000176243 | 5.13E-15 | -2.63127 | 1 | 1 CDV3P1        | -      |
| ENSG00000176246 | 5.13E-15 | -2.63127 | 1 | 1 OR4L1         | K04257 |
| ENSG00000176253 | 5.13E-15 | -2.63127 | 1 | 1 OR4K13        | K04257 |
| ENSG00000176256 | 5.13E-15 | -2.63127 | 1 | 1 HMGB4         | K11297 |
| ENSG00000176268 | 5.13E-15 | -2.63127 | 1 | 1 CYCSP34       | K08738 |
| ENSG00000176269 | 5.13E-15 | -2.63127 | 1 | 1 OR4F21        | K04257 |
| ENSG00000176274 | 5.13E-15 | -2.63127 | 1 | 1 SLC25A53      | -      |
| ENSG00000176281 | 5.13E-15 | -2.63127 | 1 | 1 OR4K5         | K04257 |
| ENSG00000176289 | 5.13E-15 | -2.63127 | 1 | 1 IDSP1         | K01136 |
| ENSG00000176290 | 5.13E-15 | -2.63127 | 1 | 1 OR4K3         | K04257 |
| ENSG00000176293 | 5.13E-15 | -2.63127 | 1 | 1 ZNF135        | K09228 |
| ENSG00000176294 | 5.13E-15 | -2.63127 | 1 | 1 OR4N2         | K04257 |
| ENSG00000176299 | 5.13E-15 | -2.63127 | 1 | 1 OR4M1         | K04257 |
| ENSG00000176302 | 5.13E-15 | -2.63127 | 1 | 1 FOXR1         | -      |
| ENSG00000176305 | 5.13E-15 | -2.63127 | 1 | 1 AC087269.1    | K06087 |
| ENSG00000176312 | 5.13E-15 | -2.63127 | 1 | 1 OR4H12P       | K04257 |
| ENSG00000176318 | 5.13E-15 | -2.63127 | 1 | 1 FOXN3P1       | K09407 |
| ENSG00000176320 | 5.13E-15 | -2.63127 | 1 | 1 RP11-404O13.5 | -      |
| ENSG00000176343 | 5.13E-15 | -2.63127 | 1 | 1 RPL37AP8      | K02921 |
| ENSG00000176378 | 5.13E-15 | -2.63127 | 1 | 1 PFN1P10       | K05759 |
| ENSG00000176381 | 5.13E-15 | -2.63127 | 1 | 1 PRR18         | K06236 |
| ENSG00000176395 | 5.13E-15 | -2.63127 | 1 | 1 CEACAM20      | -      |
| ENSG00000176402 | 5.13E-15 | -2.63127 | 1 | 1 GJC3          | K07628 |
| ENSG00000176435 | 5.13E-15 | -2.63127 | 1 | 1 CLEC14A       | K17528 |
| ENSG00000176495 | 5.13E-15 | -2.63127 | 1 | 1 OR5AN1        | K04257 |
| ENSG00000176532 | 5.13E-15 | -2.63127 | 1 | 1 PRR15         | -      |
| ENSG00000176540 | 5.13E-15 | -2.63127 | 1 | 1 OR4C5         | K04257 |
| ENSG00000176547 | 5.13E-15 | -2.63127 | 1 | 1 OR4C3         | K04257 |
| ENSG00000176555 | 5.13E-15 | -2.63127 | 1 | 1 OR4S1         | K04257 |
| ENSG00000176566 | 5.13E-15 | -2.63127 | 1 | 1 DCAF4L2       | K11799 |
| ENSG00000176567 | 5.13E-15 | -2.63127 | 1 | 1 OR4X1         | K04257 |
| ENSG00000176584 | 5.13E-15 | -2.63127 | 1 | 1 DMBT1P1       | K13912 |
| ENSG00000176593 | 5.13E-15 | -2.63127 | 1 | 1 CTD-2368P22.1 | K12581 |
| ENSG00000176595 | 5.13E-15 | -2.63127 | 1 | 1 KBTBD11       | K10476 |
| ENSG00000176605 | 5.13E-15 | -2.63127 | 1 | 1 C14orf177     | -      |
| ENSG00000176635 | 5.13E-15 | -2.63127 | 1 | 1 HORMAD2       | -      |
| ENSG00000176641 | 5.13E-15 | -2.63127 | 1 | 1 RNF152        | -      |
| ENSG00000176654 | 5.13E-15 | -2.63127 | 1 | 1 NANOGP1       | K10164 |
| ENSG00000176659 | 5.13E-15 | -2.63127 | 1 | 1 C20orf197     | -      |
| ENSG00000176679 | 5.13E-15 | -2.63127 | 1 | 1 TGIF2LY       | K19554 |
| ENSG00000176695 | 5.13E-15 | -2.63127 | 1 | 1 OR4F17        | K04257 |
| ENSG00000176716 | 5.13E-15 | -2.63127 | 1 | 1 OR10AB1P      | K04257 |
| ENSG00000176728 | 5.13E-15 | -2.63127 | 1 | 1 TTTY14        | -      |
| ENSG00000176734 | 5.13E-15 | -2.63127 | 1 | 1 TRIL          | -      |
| ENSG00000176742 | 5.13E-15 | -2.63127 | 1 | 1 OR51V1        | K04257 |
| ENSG00000176748 | 5.13E-15 | -2.63127 | 1 | 1 OR52Z1        | K04257 |
| ENSG00000176752 | 5.13E-15 | -2.63127 | 1 | 1 OR51A1P       | K04257 |
| ENSG00000176753 | 5.13E-15 | -2.63127 | 1 | 1 C15orf56      | -      |
| ENSG00000176754 | 5.13E-15 | -2.63127 | 1 | 1 LINC00303     | -      |
| ENSG00000176769 | 5.13E-15 | -2.63127 | 1 | 1 TCERG1L       | K16467 |
| ENSG00000176782 | 5.13E-15 | -2.63127 | 1 | 1 DEFB104A      | -      |
| ENSG00000176787 | 5.13E-15 | -2.63127 | 1 | 1 OR52E2        | K04257 |
| ENSG00000176797 | 5.13E-15 | -2.63127 | 1 | 1 DEFB103A      | -      |
| ENSG00000176798 | 5.13E-15 | -2.63127 | 1 | 1 OR51L1        | K04257 |
| ENSG00000176812 | 5.13E-15 | -2.63127 | 1 | 1 RP11-629O4.1  | K03439 |

|                 |          |          |   |                 |        |
|-----------------|----------|----------|---|-----------------|--------|
| ENSG00000176824 | 5.13E-15 | -2.63127 | 1 | 1 AC009951.1    | K10408 |
| ENSG00000176855 | 5.13E-15 | -2.63127 | 1 | 1 KRT18P28      | K07604 |
| ENSG00000176857 | 5.13E-15 | -2.63127 | 1 | 1 GJA1P1        | K07372 |
| ENSG00000176868 | 5.13E-15 | -2.63127 | 1 | 1 AL358781.1    | -      |
| ENSG00000176879 | 5.13E-15 | -2.63127 | 1 | 1 OR51G1        | K04257 |
| ENSG00000176882 | 5.13E-15 | -2.63127 | 1 | 1 RP11-432M24.4 | -      |
| ENSG00000176887 | 5.13E-15 | -2.63127 | 1 | 1 SOX11         | K09268 |
| ENSG00000176893 | 5.13E-15 | -2.63127 | 1 | 1 OR51G2        | K04257 |
| ENSG00000176895 | 5.13E-15 | -2.63127 | 1 | 1 OR51A7        | K04257 |
| ENSG00000176900 | 5.13E-15 | -2.63127 | 1 | 1 OR51T1        | K04257 |
| ENSG00000176904 | 5.13E-15 | -2.63127 | 1 | 1 OR51H1P       | K04257 |
| ENSG00000176922 | 5.13E-15 | -2.63127 | 1 | 1 OR51S1        | K04257 |
| ENSG00000176923 | 5.13E-15 | -2.63127 | 1 | 1 OR7A15P       | K04257 |
| ENSG00000176925 | 5.13E-15 | -2.63127 | 1 | 1 OR51F2        | K04257 |
| ENSG00000176928 | 5.13E-15 | -2.63127 | 1 | 1 GCNT4         | K09663 |
| ENSG00000176937 | 5.13E-15 | -2.63127 | 1 | 1 OR52R1        | K04257 |
| ENSG00000176951 | 5.13E-15 | -2.63127 | 1 | 1 OR51N1P       | K04257 |
| ENSG00000176956 | 5.13E-15 | -2.63127 | 1 | 1 LY6H          | K06846 |
| ENSG00000176970 | 5.13E-15 | -2.63127 | 1 | 1 RPL7L1P11     | -      |
| ENSG00000176979 | 5.13E-15 | -2.63127 | 1 | 1 TRIM60        | K12029 |
| ENSG00000176984 | 5.13E-15 | -2.63127 | 1 | 1 AP000679.2    | -      |
| ENSG00000176988 | 5.13E-15 | -2.63127 | 1 | 1 FMR1NB        | -      |
| ENSG00000176998 | 5.13E-15 | -2.63127 | 1 | 1 HCG4          | K06751 |
| ENSG00000177023 | 5.13E-15 | -2.63127 | 1 | 1 DEFB104B      | -      |
| ENSG00000177025 | 5.13E-15 | -2.63127 | 1 | 1 C19orf18      | -      |
| ENSG00000177047 | 5.13E-15 | -2.63127 | 1 | 1 IFNW1         | K05440 |
| ENSG00000177103 | 5.13E-15 | -2.63127 | 1 | 1 DSCAML1       | K06768 |
| ENSG00000177108 | 5.13E-15 | -2.63127 | 1 | 1 ZDHHC22       | K18932 |
| ENSG00000177112 | 5.13E-15 | -2.63127 | 1 | 1 MRVI1-AS1     | -      |
| ENSG00000177133 | 5.13E-15 | -2.63127 | 1 | 1 LINC00982     | -      |
| ENSG00000177143 | 5.13E-15 | -2.63127 | 1 | 1 CETN1         | K16465 |
| ENSG00000177151 | 5.13E-15 | -2.63127 | 1 | 1 OR2T35        | K04257 |
| ENSG00000177174 | 5.13E-15 | -2.63127 | 1 | 1 OR14C36       | K04257 |
| ENSG00000177181 | 5.13E-15 | -2.63127 | 1 | 1 RIMKLA        | K18311 |
| ENSG00000177186 | 5.13E-15 | -2.63127 | 1 | 1 OR2M7         | K04257 |
| ENSG00000177201 | 5.13E-15 | -2.63127 | 1 | 1 OR2T12        | K04257 |
| ENSG00000177212 | 5.13E-15 | -2.63127 | 1 | 1 OR2T33        | K04257 |
| ENSG00000177233 | 5.13E-15 | -2.63127 | 1 | 1 OR2M1P        | K04257 |
| ENSG00000177234 | 5.13E-15 | -2.63127 | 1 | 1 C10orf85      | -      |
| ENSG00000177243 | 5.13E-15 | -2.63127 | 1 | 1 DEFB103B      | -      |
| ENSG00000177257 | 5.13E-15 | -2.63127 | 1 | 1 DEFB4B        | -      |
| ENSG00000177261 | 5.13E-15 | -2.63127 | 1 | 1 ENSAP3        | -      |
| ENSG00000177272 | 5.13E-15 | -2.63127 | 1 | 1 KCNA3         | K04876 |
| ENSG00000177275 | 5.13E-15 | -2.63127 | 1 | 1 OR2AJ1        | K04257 |
| ENSG00000177294 | 5.13E-15 | -2.63127 | 1 | 1 FBXO39        | K10314 |
| ENSG00000177300 | 5.13E-15 | -2.63127 | 1 | 1 CLDN22        | K06087 |
| ENSG00000177301 | 5.13E-15 | -2.63127 | 1 | 1 KCNA2         | K04875 |
| ENSG00000177306 | 5.13E-15 | -2.63127 | 1 | 1 OR7E125P      | K04257 |
| ENSG00000177324 | 5.13E-15 | -2.63127 | 1 | 1 BEND2         | K17985 |
| ENSG00000177338 | 5.13E-15 | -2.63127 | 1 | 1 LINC00469     | -      |
| ENSG00000177350 | 5.13E-15 | -2.63127 | 1 | 1 RPL13AP3      | K02872 |
| ENSG00000177354 | 5.13E-15 | -2.63127 | 1 | 1 C10orf71      | -      |
| ENSG00000177369 | 5.13E-15 | -2.63127 | 1 | 1 RP1-62O9.3    | -      |
| ENSG00000177398 | 5.13E-15 | -2.63127 | 1 | 1 UMODL1        | -      |
| ENSG00000177400 | 5.13E-15 | -2.63127 | 1 | 1 OR7E8P        | K04257 |
| ENSG00000177414 | 5.13E-15 | -2.63127 | 1 | 1 UBE2U         | K10584 |
| ENSG00000177418 | 5.13E-15 | -2.63127 | 1 | 1 AC006001.1    | -      |
| ENSG00000177447 | 5.13E-15 | -2.63127 | 1 | 1 CBX3P1        | K11586 |

|                 |          |          |   |                 |        |
|-----------------|----------|----------|---|-----------------|--------|
| ENSG00000177462 | 5.13E-15 | -2.63127 | 1 | 1 OR2T8         | K04257 |
| ENSG00000177465 | 5.13E-15 | -2.63127 | 1 | 1 ACOT4         | K01068 |
| ENSG00000177468 | 5.13E-15 | -2.63127 | 1 | 1 OLIG3         | K09085 |
| ENSG00000177476 | 5.13E-15 | -2.63127 | 1 | 1 OR2G3         | K04257 |
| ENSG00000177489 | 5.13E-15 | -2.63127 | 1 | 1 OR2G2         | K04257 |
| ENSG00000177504 | 5.13E-15 | -2.63127 | 1 | 1 VCX2          | -      |
| ENSG00000177511 | 5.13E-15 | -2.63127 | 1 | 1 ST8SIA3       | -      |
| ENSG00000177535 | 5.13E-15 | -2.63127 | 1 | 1 OR2B11        | K04257 |
| ENSG00000177551 | 5.13E-15 | -2.63127 | 1 | 1 NHLH2         | K09075 |
| ENSG00000177553 | 5.13E-15 | -2.63127 | 1 | 1 RP11-56N19.5  | -      |
| ENSG00000177558 | 5.13E-15 | -2.63127 | 1 | 1 FAM187B       | -      |
| ENSG00000177575 | 5.13E-15 | -2.63127 | 1 | 1 CD163         | K06545 |
| ENSG00000177586 | 5.13E-15 | -2.63127 | 1 | 1 OR7E149P      | K04257 |
| ENSG00000177590 | 5.13E-15 | -2.63127 | 1 | 1 RP5-1051J4.6  | -      |
| ENSG00000177596 | 5.13E-15 | -2.63127 | 1 | 1 AL355390.1    | -      |
| ENSG00000177599 | 5.13E-15 | -2.63127 | 1 | 1 ZNF491        | K09228 |
| ENSG00000177673 | 5.13E-15 | -2.63127 | 1 | 1 C2orf57       | -      |
| ENSG00000177679 | 5.13E-15 | -2.63127 | 1 | 1 SRRM3         | -      |
| ENSG00000177684 | 5.13E-15 | -2.63127 | 1 | 1 DEFB114       | -      |
| ENSG00000177689 | 5.13E-15 | -2.63127 | 1 | 1 MAGEB10       | K17985 |
| ENSG00000177692 | 5.13E-15 | -2.63127 | 1 | 1 DNAJC28       | K19373 |
| ENSG00000177693 | 5.13E-15 | -2.63127 | 1 | 1 OR4F4         | K04257 |
| ENSG00000177699 | 5.13E-15 | -2.63127 | 1 | 1 RP11-16K12.1  | -      |
| ENSG00000177725 | 5.13E-15 | -2.63127 | 1 | 1 AC105206.1    | K09228 |
| ENSG00000177736 | 5.13E-15 | -2.63127 | 1 | 1 RP11-474P12.3 | K19054 |
| ENSG00000177752 | 5.13E-15 | -2.63127 | 1 | 1 YIPF7         | -      |
| ENSG00000177776 | 5.13E-15 | -2.63127 | 1 | 1 RPS2P2        | K02981 |
| ENSG00000177800 | 5.13E-15 | -2.63127 | 1 | 1 TMEM78        | K09488 |
| ENSG00000177803 | 5.13E-15 | -2.63127 | 1 | 1 RP11-606P2.1  | K16197 |
| ENSG00000177820 | 5.13E-15 | -2.63127 | 1 | 1 AC004917.1    | -      |
| ENSG00000177839 | 5.13E-15 | -2.63127 | 1 | 1 PCDHB9        | K16494 |
| ENSG00000177853 | 5.13E-15 | -2.63127 | 1 | 1 ZNF518A       | -      |
| ENSG00000177875 | 5.13E-15 | -2.63127 | 1 | 1 C12orf68      | -      |
| ENSG00000177910 | 5.13E-15 | -2.63127 | 1 | 1 SPATA31C2     | -      |
| ENSG00000177932 | 5.13E-15 | -2.63127 | 1 | 1 ZNF354C       | K09228 |
| ENSG00000177938 | 5.13E-15 | -2.63127 | 1 | 1 CAPZA3        | K10364 |
| ENSG00000177947 | 5.13E-15 | -2.63127 | 1 | 1 ODF3          | -      |
| ENSG00000177992 | 5.13E-15 | -2.63127 | 1 | 1 SPATA31E1     | -      |
| ENSG00000177994 | 5.13E-15 | -2.63127 | 1 | 1 C2orf73       | -      |
| ENSG00000178015 | 5.13E-15 | -2.63127 | 1 | 1 GPR150        | K08434 |
| ENSG00000178021 | 5.13E-15 | -2.63127 | 1 | 1 TSPYL6        | K11289 |
| ENSG00000178031 | 5.13E-15 | -2.63127 | 1 | 1 ADAMTSL1      | -      |
| ENSG00000178053 | 5.13E-15 | -2.63127 | 1 | 1 MLF1          | K15622 |
| ENSG00000178055 | 5.13E-15 | -2.63127 | 1 | 1 PRSS42        | -      |
| ENSG00000178081 | 5.13E-15 | -2.63127 | 1 | 1 ULK4P3        | K17545 |
| ENSG00000178115 | 5.13E-15 | -2.63127 | 1 | 1 GOLGA8Q       | K10595 |
| ENSG00000178130 | 5.13E-15 | -2.63127 | 1 | 1 FAM27L        | -      |
| ENSG00000178163 | 5.13E-15 | -2.63127 | 1 | 1 ZNF518B       | -      |
| ENSG00000178175 | 5.13E-15 | -2.63127 | 1 | 1 ZNF366        | -      |
| ENSG00000178187 | 5.13E-15 | -2.63127 | 1 | 1 ZNF454        | K09228 |
| ENSG00000178206 | 5.13E-15 | -2.63127 | 1 | 1 CYP4F31P      | K17726 |
| ENSG00000178217 | 5.13E-15 | -2.63127 | 1 | 1 SH2D4B        | -      |
| ENSG00000178235 | 5.13E-15 | -2.63127 | 1 | 1 SLITRK1       | -      |
| ENSG00000178243 | 5.13E-15 | -2.63127 | 1 | 1 C9orf62       | -      |
| ENSG00000178248 | 5.13E-15 | -2.63127 | 1 | 1 AP000345.1    | -      |
| ENSG00000178257 | 5.13E-15 | -2.63127 | 1 | 1 PRM3          | -      |
| ENSG00000178279 | 5.13E-15 | -2.63127 | 1 | 1 TNP2          | -      |
| ENSG00000178287 | 5.13E-15 | -2.63127 | 1 | 1 SPAG11A       | -      |

|                 |          |          |   |                   |        |
|-----------------|----------|----------|---|-------------------|--------|
| ENSG00000178343 | 5.13E-15 | -2.63127 | 1 | 1 SHISA3          | -      |
| ENSG00000178358 | 5.13E-15 | -2.63127 | 1 | 1 OR2D3           | K04257 |
| ENSG00000178363 | 5.13E-15 | -2.63127 | 1 | 1 CALML3          | K02183 |
| ENSG00000178372 | 5.13E-15 | -2.63127 | 1 | 1 CALML5          | K02183 |
| ENSG00000178394 | 5.13E-15 | -2.63127 | 1 | 1 HTR1A           | K04153 |
| ENSG00000178395 | 5.13E-15 | -2.63127 | 1 | 1 C1orf65         | -      |
| ENSG00000178403 | 5.13E-15 | -2.63127 | 1 | 1 NEUROG2         | K09082 |
| ENSG00000178409 | 5.13E-15 | -2.63127 | 1 | 1 BEND3           | -      |
| ENSG00000178457 | 5.13E-15 | -2.63127 | 1 | 1 LINC00314       | -      |
| ENSG00000178462 | 5.13E-15 | -2.63127 | 1 | 1 TUBAL3          | K07374 |
| ENSG00000178473 | 5.13E-15 | -2.63127 | 1 | 1 UCN3            | K05257 |
| ENSG00000178498 | 5.13E-15 | -2.63127 | 1 | 1 DTX3            | K06058 |
| ENSG00000178502 | 5.13E-15 | -2.63127 | 1 | 1 KLHL11          | K10449 |
| ENSG00000178503 | 5.13E-15 | -2.63127 | 1 | 1 NECAP1P1        | -      |
| ENSG00000178522 | 5.13E-15 | -2.63127 | 1 | 1 AMBN            | -      |
| ENSG00000178538 | 5.13E-15 | -2.63127 | 1 | 1 CA8             | K01672 |
| ENSG00000178550 | 5.13E-15 | -2.63127 | 1 | 1 AC010170.1      | K01869 |
| ENSG00000178556 | 5.13E-15 | -2.63127 | 1 | 1 CKS1BP6         | K02219 |
| ENSG00000178562 | 5.13E-15 | -2.63127 | 1 | 1 CD28            | K06470 |
| ENSG00000178568 | 5.13E-15 | -2.63127 | 1 | 1 ERBB4           | K05085 |
| ENSG00000178573 | 5.13E-15 | -2.63127 | 1 | 1 MAF             | K09035 |
| ENSG00000178586 | 5.13E-15 | -2.63127 | 1 | 1 OR6B3           | K04257 |
| ENSG00000178591 | 5.13E-15 | -2.63127 | 1 | 1 DEFB125         | -      |
| ENSG00000178596 | 5.13E-15 | -2.63127 | 1 | 1 GAPDHP29        | K00134 |
| ENSG00000178602 | 5.13E-15 | -2.63127 | 1 | 1 OTOS            | -      |
| ENSG00000178636 | 5.13E-15 | -2.63127 | 1 | 1 RP11-455G16.1   | K12581 |
| ENSG00000178642 | 5.13E-15 | -2.63127 | 1 | 1 AL513477.1      | K04613 |
| ENSG00000178645 | 5.13E-15 | -2.63127 | 1 | 1 C10orf53        | -      |
| ENSG00000178654 | 5.13E-15 | -2.63127 | 1 | 1 RP11-366I21.1   | K03767 |
| ENSG00000178662 | 5.13E-15 | -2.63127 | 1 | 1 CSRNP3          | K04834 |
| ENSG00000178690 | 5.13E-15 | -2.63127 | 1 | 1 DYNAP           | -      |
| ENSG00000178722 | 5.13E-15 | -2.63127 | 1 | 1 C5orf64         | -      |
| ENSG00000178732 | 5.13E-15 | -2.63127 | 1 | 1 GP5             | K06260 |
| ENSG00000178750 | 5.13E-15 | -2.63127 | 1 | 1 STX19           | K08487 |
| ENSG00000178762 | 5.13E-15 | -2.63127 | 1 | 1 HIST1H2BPS1     | K11252 |
| ENSG00000178789 | 5.13E-15 | -2.63127 | 1 | 1 CD300LB         | -      |
| ENSG00000178795 | 5.13E-15 | -2.63127 | 1 | 1 GDPD4           | -      |
| ENSG00000178796 | 5.13E-15 | -2.63127 | 1 | 1 RIIAD1          | -      |
| ENSG00000178803 | 5.13E-15 | -2.63127 | 1 | 1 ADORA2A-AS1     | -      |
| ENSG00000178804 | 5.13E-15 | -2.63127 | 1 | 1 H1FOO           | -      |
| ENSG00000178828 | 5.13E-15 | -2.63127 | 1 | 1 RNF186          | -      |
| ENSG00000178836 | 5.13E-15 | -2.63127 | 1 | 1 AC114812.5      | K09509 |
| ENSG00000178863 | 5.13E-15 | -2.63127 | 1 | 1 CEBPA-AS1       | -      |
| ENSG00000178894 | 5.13E-15 | -2.63127 | 1 | 1 AC073416.1      | -      |
| ENSG00000178928 | 5.13E-15 | -2.63127 | 1 | 1 TPRX1           | -      |
| ENSG00000178934 | 5.13E-15 | -2.63127 | 1 | 1 LGALS7B         | K10092 |
| ENSG00000178947 | 5.13E-15 | -2.63127 | 1 | 1 LINC00086       | -      |
| ENSG00000178965 | 5.13E-15 | -2.63127 | 1 | 1 C1orf173        | -      |
| ENSG00000179002 | 5.13E-15 | -2.63127 | 1 | 1 TAS1R2          | K04625 |
| ENSG00000179008 | 5.13E-15 | -2.63127 | 1 | 1 C14orf39        | -      |
| ENSG00000179028 | 5.13E-15 | -2.63127 | 1 | 1 RP11-363G10.2   | -      |
| ENSG00000179031 | 5.13E-15 | -2.63127 | 1 | 1 LL0XNC01-131B10 | K14842 |
| ENSG00000179038 | 5.13E-15 | -2.63127 | 1 | 1 AP001885.1      | K15712 |
| ENSG00000179055 | 5.13E-15 | -2.63127 | 1 | 1 OR13D1          | K04257 |
| ENSG00000179071 | 5.13E-15 | -2.63127 | 1 | 1 CCDC89          | -      |
| ENSG00000179073 | 5.13E-15 | -2.63127 | 1 | 1 TAAR3           | K05051 |
| ENSG00000179088 | 5.13E-15 | -2.63127 | 1 | 1 C12orf42        | -      |
| ENSG00000179097 | 5.13E-15 | -2.63127 | 1 | 1 HTR1F           | K04153 |

|                 |          |          |   |                 |        |
|-----------------|----------|----------|---|-----------------|--------|
| ENSG00000179104 | 5.13E-15 | -2.63127 | 1 | 1 TMTC2         | -      |
| ENSG00000179131 | 5.13E-15 | -2.63127 | 1 | 1 RP11-458F8.3  | K02910 |
| ENSG00000179141 | 5.13E-15 | -2.63127 | 1 | 1 MTUS2-AS1     | -      |
| ENSG00000179142 | 5.13E-15 | -2.63127 | 1 | 1 CYP11B2       | K00497 |
| ENSG00000179144 | 5.13E-15 | -2.63127 | 1 | 1 GIMAP7        | -      |
| ENSG00000179157 | 5.13E-15 | -2.63127 | 1 | 1 RPS2P28       | K02981 |
| ENSG00000179170 | 5.13E-15 | -2.63127 | 1 | 1 OR7E97P       | K04257 |
| ENSG00000179172 | 5.13E-15 | -2.63127 | 1 | 1 HNRNPCL1      | K12884 |
| ENSG00000179178 | 5.13E-15 | -2.63127 | 1 | 1 TMEM125       | -      |
| ENSG00000179213 | 5.13E-15 | -2.63127 | 1 | 1 SIGLECL1      | -      |
| ENSG00000179222 | 5.13E-15 | -2.63127 | 1 | 1 MAGED1        | K12464 |
| ENSG00000179253 | 5.13E-15 | -2.63127 | 1 | 1 RP11-429E11.3 | K08834 |
| ENSG00000179270 | 5.13E-15 | -2.63127 | 1 | 1 C2orf71       | -      |
| ENSG00000179277 | 5.13E-15 | -2.63127 | 1 | 1 MEIS3P1       | K16671 |
| ENSG00000179299 | 5.13E-15 | -2.63127 | 1 | 1 NSUN7         | -      |
| ENSG00000179300 | 5.13E-15 | -2.63127 | 1 | 1 ZCCHC5        | -      |
| ENSG00000179314 | 5.13E-15 | -2.63127 | 1 | 1 WSCD1         | -      |
| ENSG00000179331 | 5.13E-15 | -2.63127 | 1 | 1 RAB39A        | K07924 |
| ENSG00000179342 | 5.13E-15 | -2.63127 | 1 | 1 GS1-124K5.9   | K04635 |
| ENSG00000179344 | 5.13E-15 | -2.63127 | 1 | 1 HLA-DQB1      | -      |
| ENSG00000179363 | 5.13E-15 | -2.63127 | 1 | 1 TMEM31        | K05271 |
| ENSG00000179397 | 5.13E-15 | -2.63127 | 1 | 1 C1orf101      | K16895 |
| ENSG00000179412 | 5.13E-15 | -2.63127 | 1 | 1 HNRNPCP5      | K12884 |
| ENSG00000179420 | 5.13E-15 | -2.63127 | 1 | 1 OR6W1P        | K04257 |
| ENSG00000179443 | 5.13E-15 | -2.63127 | 1 | 1 OR13C6P       | K04257 |
| ENSG00000179447 | 5.13E-15 | -2.63127 | 1 | 1 RP5-1027G4.3  | -      |
| ENSG00000179449 | 5.13E-15 | -2.63127 | 1 | 1 AC124309.1    | -      |
| ENSG00000179460 | 5.13E-15 | -2.63127 | 1 | 1 EEF1A1P27     | K03231 |
| ENSG00000179467 | 5.13E-15 | -2.63127 | 1 | 1 AL109806.1    | K10653 |
| ENSG00000179468 | 5.13E-15 | -2.63127 | 1 | 1 OR9A2         | K04257 |
| ENSG00000179520 | 5.13E-15 | -2.63127 | 1 | 1 SLC17A8       | K12302 |
| ENSG00000179542 | 5.13E-15 | -2.63127 | 1 | 1 SLITRK4       | -      |
| ENSG00000179564 | 5.13E-15 | -2.63127 | 1 | 1 LSMEM2        | -      |
| ENSG00000179571 | 5.13E-15 | -2.63127 | 1 | 1 NBPF23        | -      |
| ENSG00000179577 | 5.13E-15 | -2.63127 | 1 | 1 AP003471.1    | -      |
| ENSG00000179600 | 5.13E-15 | -2.63127 | 1 | 1 GPHB5         | -      |
| ENSG00000179603 | 5.13E-15 | -2.63127 | 1 | 1 GRM8          | K04608 |
| ENSG00000179615 | 5.13E-15 | -2.63127 | 1 | 1 OR2AP1        | K04257 |
| ENSG00000179626 | 5.13E-15 | -2.63127 | 1 | 1 OR6C4         | K04257 |
| ENSG00000179636 | 5.13E-15 | -2.63127 | 1 | 1 TPPP2         | -      |
| ENSG00000179639 | 5.13E-15 | -2.63127 | 1 | 1 FCER1A        | K08089 |
| ENSG00000179676 | 5.13E-15 | -2.63127 | 1 | 1 LINC00305     | -      |
| ENSG00000179695 | 5.13E-15 | -2.63127 | 1 | 1 OR6C2         | K04257 |
| ENSG00000179709 | 5.13E-15 | -2.63127 | 1 | 1 NLRP8         | K04264 |
| ENSG00000179751 | 5.13E-15 | -2.63127 | 1 | 1 SYCN          | -      |
| ENSG00000179755 | 5.13E-15 | -2.63127 | 1 | 1 CTD-2144E22.5 | -      |
| ENSG00000179796 | 5.13E-15 | -2.63127 | 1 | 1 LRRC3B        | -      |
| ENSG00000179799 | 5.13E-15 | -2.63127 | 1 | 1 OR7E22P       | K04257 |
| ENSG00000179813 | 5.13E-15 | -2.63127 | 1 | 1 FAM216B       | -      |
| ENSG00000179817 | 5.13E-15 | -2.63127 | 1 | 1 MRGPRX4       | K08396 |
| ENSG00000179826 | 5.13E-15 | -2.63127 | 1 | 1 MRGPRX3       | K08396 |
| ENSG00000179837 | 5.13E-15 | -2.63127 | 1 | 1 RBM15B        | K13190 |
| ENSG00000179840 | 5.13E-15 | -2.63127 | 1 | 1 C1orf200      | -      |
| ENSG00000179869 | 5.13E-15 | -2.63127 | 1 | 1 ABCA13        | K05647 |
| ENSG00000179873 | 5.13E-15 | -2.63127 | 1 | 1 NLRP11        | -      |
| ENSG00000179914 | 5.13E-15 | -2.63127 | 1 | 1 ITLN1         | K17527 |
| ENSG00000179919 | 5.13E-15 | -2.63127 | 1 | 1 OR10A7        | K04257 |
| ENSG00000179930 | 5.13E-15 | -2.63127 | 1 | 1 ZNF648        | K09230 |

|                 |          |          |   |                 |        |
|-----------------|----------|----------|---|-----------------|--------|
| ENSG00000179934 | 5.13E-15 | -2.63127 | 1 | 1 CCR8          | K04183 |
| ENSG00000179935 | 5.13E-15 | -2.63127 | 1 | 1 LINC00652     | -      |
| ENSG00000179938 | 5.13E-15 | -2.63127 | 1 | 1 GOLGA8J       | K10595 |
| ENSG00000179978 | 5.13E-15 | -2.63127 | 1 | 1 RP11-1319K7.1 | K12807 |
| ENSG00000179994 | 5.13E-15 | -2.63127 | 1 | 1 SPDYE7P       | K08694 |
| ENSG00000179997 | 5.13E-15 | -2.63127 | 1 | 1 AC010894.4    | K10740 |
| ENSG00000180016 | 5.13E-15 | -2.63127 | 1 | 1 OR1E1         | K04257 |
| ENSG00000180042 | 5.13E-15 | -2.63127 | 1 | 1 OR1R1P        | K04257 |
| ENSG00000180044 | 5.13E-15 | -2.63127 | 1 | 1 C3orf80       | -      |
| ENSG00000180053 | 5.13E-15 | -2.63127 | 1 | 1 NKX2-6        | K09346 |
| ENSG00000180061 | 5.13E-15 | -2.63127 | 1 | 1 TMEM150B      | -      |
| ENSG00000180068 | 5.13E-15 | -2.63127 | 1 | 1 OR3A4P        | K04257 |
| ENSG00000180081 | 5.13E-15 | -2.63127 | 1 | 1 CTC-451A6.4   | -      |
| ENSG00000180083 | 5.13E-15 | -2.63127 | 1 | 1 WFDC11        | -      |
| ENSG00000180090 | 5.13E-15 | -2.63127 | 1 | 1 OR3A1         | K04257 |
| ENSG00000180116 | 5.13E-15 | -2.63127 | 1 | 1 C12orf40      | -      |
| ENSG00000180138 | 5.13E-15 | -2.63127 | 1 | 1 CSNK1A1L      | K08957 |
| ENSG00000180150 | 5.13E-15 | -2.63127 | 1 | 1 HMGX2P9       | K11300 |
| ENSG00000180152 | 5.13E-15 | -2.63127 | 1 | 1 AC079753.4    | K04725 |
| ENSG00000180172 | 5.13E-15 | -2.63127 | 1 | 1 RPS12P23      | K02951 |
| ENSG00000180176 | 5.13E-15 | -2.63127 | 1 | 1 TH            | K00501 |
| ENSG00000180190 | 5.13E-15 | -2.63127 | 1 | 1 TDRP          | -      |
| ENSG00000180205 | 5.13E-15 | -2.63127 | 1 | 1 WFDC9         | -      |
| ENSG00000180219 | 5.13E-15 | -2.63127 | 1 | 1 FAM71C        | -      |
| ENSG00000180221 | 5.13E-15 | -2.63127 | 1 | 1 TPT1P10       | -      |
| ENSG00000180230 | 5.13E-15 | -2.63127 | 1 | 1 NACAP2        | K03626 |
| ENSG00000180251 | 5.13E-15 | -2.63127 | 1 | 1 SLC9A4        | K13961 |
| ENSG00000180259 | 5.13E-15 | -2.63127 | 1 | 1 PRNT          | -      |
| ENSG00000180269 | 5.13E-15 | -2.63127 | 1 | 1 GPR139        | K08428 |
| ENSG00000180284 | 5.13E-15 | -2.63127 | 1 | 1 RP5-1055C14.6 | -      |
| ENSG00000180287 | 5.13E-15 | -2.63127 | 1 | 1 PLD5          | K16861 |
| ENSG00000180305 | 5.13E-15 | -2.63127 | 1 | 1 WFDC10A       | -      |
| ENSG00000180318 | 5.13E-15 | -2.63127 | 1 | 1 ALX1          | K09334 |
| ENSG00000180332 | 5.13E-15 | -2.63127 | 1 | 1 KCTD4         | -      |
| ENSG00000180344 | 5.13E-15 | -2.63127 | 1 | 1 AL035460.1    | -      |
| ENSG00000180347 | 5.13E-15 | -2.63127 | 1 | 1 CCDC129       | -      |
| ENSG00000180383 | 5.13E-15 | -2.63127 | 1 | 1 DEFB124       | K07847 |
| ENSG00000180386 | 5.13E-15 | -2.63127 | 1 | 1 KRTAP9-7      | -      |
| ENSG00000180389 | 5.13E-15 | -2.63127 | 1 | 1 ATP5EP2       | K02135 |
| ENSG00000180409 | 5.13E-15 | -2.63127 | 1 | 1 OR10AA1P      | K04257 |
| ENSG00000180424 | 5.13E-15 | -2.63127 | 1 | 1 DEFB123       | -      |
| ENSG00000180432 | 5.13E-15 | -2.63127 | 1 | 1 CYP8B1        | K07431 |
| ENSG00000180433 | 5.13E-15 | -2.63127 | 1 | 1 OR6K6         | K04257 |
| ENSG00000180437 | 5.13E-15 | -2.63127 | 1 | 1 OR6K4P        | K04257 |
| ENSG00000180438 | 5.13E-15 | -2.63127 | 1 | 1 TPRXL         | K16618 |
| ENSG00000180440 | 5.13E-15 | -2.63127 | 1 | 1 SERTM1        | -      |
| ENSG00000180458 | 5.13E-15 | -2.63127 | 1 | 1 CTD-3064H18.4 | -      |
| ENSG00000180475 | 5.13E-15 | -2.63127 | 1 | 1 OR10Q1        | K04257 |
| ENSG00000180483 | 5.13E-15 | -2.63127 | 1 | 1 DEFB119       | -      |
| ENSG00000180509 | 5.13E-15 | -2.63127 | 1 | 1 KCNE1         | K17985 |
| ENSG00000180525 | 5.13E-15 | -2.63127 | 1 | 1 PRR26         | -      |
| ENSG00000180532 | 5.13E-15 | -2.63127 | 1 | 1 ZSCAN4        | K09230 |
| ENSG00000180535 | 5.13E-15 | -2.63127 | 1 | 1 BHLHA15       | K08040 |
| ENSG00000180543 | 5.13E-15 | -2.63127 | 1 | 1 TSPYL5        | K11288 |
| ENSG00000180613 | 5.13E-15 | -2.63127 | 1 | 1 GSX2          | K09310 |
| ENSG00000180636 | 5.13E-15 | -2.63127 | 1 | 1 OR4E1         | K04257 |
| ENSG00000180644 | 5.13E-15 | -2.63127 | 1 | 1 PRF1          | K07818 |
| ENSG00000180658 | 5.13E-15 | -2.63127 | 1 | 1 OR2A4         | K04257 |

|                 |          |          |   |                 |        |
|-----------------|----------|----------|---|-----------------|--------|
| ENSG00000180660 | 5.13E-15 | -2.63127 | 1 | 1 MAB21L1       | -      |
| ENSG00000180662 | 5.13E-15 | -2.63127 | 1 | 1 RPL21P8       | K02889 |
| ENSG00000180663 | 5.13E-15 | -2.63127 | 1 | 1 VN1R3         | K04614 |
| ENSG00000180708 | 5.13E-15 | -2.63127 | 1 | 1 OR10K2        | K04257 |
| ENSG00000180712 | 5.13E-15 | -2.63127 | 1 | 1 RP11-290F5.2  | -      |
| ENSG00000180714 | 5.13E-15 | -2.63127 | 1 | 1 OR5AZ1P       | K04257 |
| ENSG00000180723 | 5.13E-15 | -2.63127 | 1 | 1 OR51A9P       | K04257 |
| ENSG00000180725 | 5.13E-15 | -2.63127 | 1 | 1 AC015871.1    | -      |
| ENSG00000180730 | 5.13E-15 | -2.63127 | 1 | 1 SHISA2        | K12581 |
| ENSG00000180745 | 5.13E-15 | -2.63127 | 1 | 1 CLRN3         | -      |
| ENSG00000180770 | 5.13E-15 | -2.63127 | 1 | 1 OR7E129P      | K04257 |
| ENSG00000180771 | 5.13E-15 | -2.63127 | 1 | 1 SRSF8         | K12891 |
| ENSG00000180772 | 5.13E-15 | -2.63127 | 1 | 1 AGTR2         | K04167 |
| ENSG00000180777 | 5.13E-15 | -2.63127 | 1 | 1 ANKRD30B      | -      |
| ENSG00000180785 | 5.13E-15 | -2.63127 | 1 | 1 OR51E1        | K04257 |
| ENSG00000180803 | 5.13E-15 | -2.63127 | 1 | 1 RP11-467D10.2 | -      |
| ENSG00000180828 | 5.13E-15 | -2.63127 | 1 | 1 BHLHE22       | K09086 |
| ENSG00000180861 | 5.13E-15 | -2.63127 | 1 | 1 C12orf36      | -      |
| ENSG00000180869 | 5.13E-15 | -2.63127 | 1 | 1 C1orf180      | -      |
| ENSG00000180871 | 5.13E-15 | -2.63127 | 1 | 1 CXCR2         | K05050 |
| ENSG00000180872 | 5.13E-15 | -2.63127 | 1 | 1 DEFB112       | -      |
| ENSG00000180875 | 5.13E-15 | -2.63127 | 1 | 1 GREM2         | -      |
| ENSG00000180909 | 5.13E-15 | -2.63127 | 1 | 1 OR52B1P       | K04257 |
| ENSG00000180910 | 5.13E-15 | -2.63127 | 1 | 1 TTTY11        | -      |
| ENSG00000180913 | 5.13E-15 | -2.63127 | 1 | 1 OR56B3P       | K04257 |
| ENSG00000180919 | 5.13E-15 | -2.63127 | 1 | 1 OR56B4        | K04257 |
| ENSG00000180926 | 5.13E-15 | -2.63127 | 1 | 1 OR7E18P       | K04257 |
| ENSG00000180929 | 5.13E-15 | -2.63127 | 1 | 1 GPR62         | K08415 |
| ENSG00000180934 | 5.13E-15 | -2.63127 | 1 | 1 OR56A1        | K04257 |
| ENSG00000180974 | 5.13E-15 | -2.63127 | 1 | 1 OR52E4        | K04257 |
| ENSG00000180987 | 5.13E-15 | -2.63127 | 1 | 1 AC123768.1    | -      |
| ENSG00000180988 | 5.13E-15 | -2.63127 | 1 | 1 OR52N2        | K04257 |
| ENSG00000181001 | 5.13E-15 | -2.63127 | 1 | 1 OR52N1        | K04257 |
| ENSG00000181007 | 5.13E-15 | -2.63127 | 1 | 1 ZFP82         | K09228 |
| ENSG00000181009 | 5.13E-15 | -2.63127 | 1 | 1 OR52N5        | K04257 |
| ENSG00000181013 | 5.13E-15 | -2.63127 | 1 | 1 C17orf47      | K16943 |
| ENSG00000181017 | 5.13E-15 | -2.63127 | 1 | 1 OR56B2P       | K04257 |
| ENSG00000181023 | 5.13E-15 | -2.63127 | 1 | 1 OR56B1        | K04257 |
| ENSG00000181031 | 5.13E-15 | -2.63127 | 1 | 1 RPH3AL        | -      |
| ENSG00000181036 | 5.13E-15 | -2.63127 | 1 | 1 FCRL6         | K17273 |
| ENSG00000181072 | 5.13E-15 | -2.63127 | 1 | 1 CHRM2         | -      |
| ENSG00000181074 | 5.13E-15 | -2.63127 | 1 | 1 OR52N4        | K04257 |
| ENSG00000181092 | 5.13E-15 | -2.63127 | 1 | 1 ADIPOQ        | K07296 |
| ENSG00000181101 | 5.13E-15 | -2.63127 | 1 | 1 SDCCAG3P2     | -      |
| ENSG00000181109 | 5.13E-15 | -2.63127 | 1 | 1 OR52P1P       | K04257 |
| ENSG00000181126 | 5.13E-15 | -2.63127 | 1 | 1 HLA-V         | K06751 |
| ENSG00000181171 | 5.13E-15 | -2.63127 | 1 | 1 FER1L6-AS1    | -      |
| ENSG00000181195 | 5.13E-15 | -2.63127 | 1 | 1 PENK          | K18832 |
| ENSG00000181201 | 5.13E-15 | -2.63127 | 1 | 1 HIST3H2BA     | K11252 |
| ENSG00000181211 | 5.13E-15 | -2.63127 | 1 | 1 HECW1-IT1     | -      |
| ENSG00000181214 | 5.13E-15 | -2.63127 | 1 | 1 OR8G2P        | K04257 |
| ENSG00000181215 | 5.13E-15 | -2.63127 | 1 | 1 C4orf50       | -      |
| ENSG00000181234 | 5.13E-15 | -2.63127 | 1 | 1 TMEM132C      | K17599 |
| ENSG00000181273 | 5.13E-15 | -2.63127 | 1 | 1 OR5AK2        | K04257 |
| ENSG00000181282 | 5.13E-15 | -2.63127 | 1 | 1 OR5AK3P       | K04257 |
| ENSG00000181291 | 5.13E-15 | -2.63127 | 1 | 1 TMEM132E      | K17599 |
| ENSG00000181296 | 5.13E-15 | -2.63127 | 1 | 1 OR5G1P        | K04257 |
| ENSG00000181325 | 5.13E-15 | -2.63127 | 1 | 1 OR9G3P        | K04257 |

|                 |          |          |   |                 |        |
|-----------------|----------|----------|---|-----------------|--------|
| ENSG00000181359 | 5.13E-15 | -2.63127 | 1 | 1 HSP90AA6P     | K04079 |
| ENSG00000181371 | 5.13E-15 | -2.63127 | 1 | 1 OR5M8         | K04257 |
| ENSG00000181374 | 5.13E-15 | -2.63127 | 1 | 1 CCL13         | K16595 |
| ENSG00000181378 | 5.13E-15 | -2.63127 | 1 | 1 CCDC108       | -      |
| ENSG00000181395 | 5.13E-15 | -2.63127 | 1 | 1 OR5AL1        | K04257 |
| ENSG00000181408 | 5.13E-15 | -2.63127 | 1 | 1 UTS2R         | K04241 |
| ENSG00000181433 | 5.13E-15 | -2.63127 | 1 | 1 SAGE1         | K13180 |
| ENSG00000181449 | 5.13E-15 | -2.63127 | 1 | 1 SOX2          | K16796 |
| ENSG00000181464 | 5.13E-15 | -2.63127 | 1 | 1 CDRT1         | K10266 |
| ENSG00000181495 | 5.13E-15 | -2.63127 | 1 | 1 AC026703.1    | -      |
| ENSG00000181499 | 5.13E-15 | -2.63127 | 1 | 1 OR6T1         | K04257 |
| ENSG00000181511 | 5.13E-15 | -2.63127 | 1 | 1 RP4-655L22.4  | K07390 |
| ENSG00000181514 | 5.13E-15 | -2.63127 | 1 | 1 RP3-474G15.1  | -      |
| ENSG00000181518 | 5.13E-15 | -2.63127 | 1 | 1 OR8D4         | K04257 |
| ENSG00000181552 | 5.13E-15 | -2.63127 | 1 | 1 EDDM3B        | -      |
| ENSG00000181562 | 5.13E-15 | -2.63127 | 1 | 1 EDDM3A        | -      |
| ENSG00000181609 | 5.13E-15 | -2.63127 | 1 | 1 OR52D1        | K04257 |
| ENSG00000181616 | 5.13E-15 | -2.63127 | 1 | 1 OR52H1        | K04257 |
| ENSG00000181617 | 5.13E-15 | -2.63127 | 1 | 1 FDCSP         | -      |
| ENSG00000181626 | 5.13E-15 | -2.63127 | 1 | 1 ANKRD62       | K04613 |
| ENSG00000181631 | 5.13E-15 | -2.63127 | 1 | 1 P2RY13        | K08388 |
| ENSG00000181656 | 5.13E-15 | -2.63127 | 1 | 1 GPR88         | K08422 |
| ENSG00000181689 | 5.13E-15 | -2.63127 | 1 | 1 OR8K3         | K04257 |
| ENSG00000181693 | 5.13E-15 | -2.63127 | 1 | 1 OR8H1         | K04257 |
| ENSG00000181698 | 5.13E-15 | -2.63127 | 1 | 1 OR5T1         | K04257 |
| ENSG00000181705 | 5.13E-15 | -2.63127 | 1 | 1 RP11-11L12.2  | -      |
| ENSG00000181718 | 5.13E-15 | -2.63127 | 1 | 1 OR5T2         | K04257 |
| ENSG00000181733 | 5.13E-15 | -2.63127 | 1 | 1 OR2Z1         | K04257 |
| ENSG00000181752 | 5.13E-15 | -2.63127 | 1 | 1 OR8K5         | K04257 |
| ENSG00000181761 | 5.13E-15 | -2.63127 | 1 | 1 OR8H3         | K04257 |
| ENSG00000181767 | 5.13E-15 | -2.63127 | 1 | 1 OR8H2         | K04257 |
| ENSG00000181778 | 5.13E-15 | -2.63127 | 1 | 1 TMEM252       | -      |
| ENSG00000181780 | 5.13E-15 | -2.63127 | 1 | 1 OR5J1P        | K04257 |
| ENSG00000181785 | 5.13E-15 | -2.63127 | 1 | 1 OR5AS1        | K04257 |
| ENSG00000181786 | 5.13E-15 | -2.63127 | 1 | 1 ACTL9         | K12314 |
| ENSG00000181791 | 5.13E-15 | -2.63127 | 1 | 1 AC009041.1    | -      |
| ENSG00000181800 | 5.13E-15 | -2.63127 | 1 | 1 CELF2-AS1     | -      |
| ENSG00000181803 | 5.13E-15 | -2.63127 | 1 | 1 OR6S1         | K04257 |
| ENSG00000181804 | 5.13E-15 | -2.63127 | 1 | 1 SLC9A9        | K14725 |
| ENSG00000181837 | 5.13E-15 | -2.63127 | 1 | 1 OR5D17P       | K04257 |
| ENSG00000181847 | 5.13E-15 | -2.63127 | 1 | 1 TIGIT         | K16350 |
| ENSG00000181867 | 5.13E-15 | -2.63127 | 1 | 1 FTMT          | K18495 |
| ENSG00000181903 | 5.13E-15 | -2.63127 | 1 | 1 OR4C6         | K04257 |
| ENSG00000181927 | 5.13E-15 | -2.63127 | 1 | 1 OR4P4         | K04257 |
| ENSG00000181935 | 5.13E-15 | -2.63127 | 1 | 1 OR4C16        | K04257 |
| ENSG00000181939 | 5.13E-15 | -2.63127 | 1 | 1 OR4C15        | K04257 |
| ENSG00000181943 | 5.13E-15 | -2.63127 | 1 | 1 OR4A21P       | K04257 |
| ENSG00000181950 | 5.13E-15 | -2.63127 | 1 | 1 OR4A13P       | K04257 |
| ENSG00000181958 | 5.13E-15 | -2.63127 | 1 | 1 OR4A15        | K04257 |
| ENSG00000181961 | 5.13E-15 | -2.63127 | 1 | 1 OR4A16        | K04257 |
| ENSG00000181963 | 5.13E-15 | -2.63127 | 1 | 1 OR52K2        | K04257 |
| ENSG00000181965 | 5.13E-15 | -2.63127 | 1 | 1 NEUROG1       | K09081 |
| ENSG00000181977 | 5.13E-15 | -2.63127 | 1 | 1 PYY3          | K05233 |
| ENSG00000181982 | 5.13E-15 | -2.63127 | 1 | 1 CCDC149       | K16627 |
| ENSG00000181984 | 5.13E-15 | -2.63127 | 1 | 1 GOLGA8CP      | K10595 |
| ENSG00000181995 | 5.13E-15 | -2.63127 | 1 | 1 LINC00301     | -      |
| ENSG00000181997 | 5.13E-15 | -2.63127 | 1 | 1 AQP7P2        | K08771 |
| ENSG00000182000 | 5.13E-15 | -2.63127 | 1 | 1 RP11-651P23.2 | K03767 |



|                 |          |          |   |                |        |
|-----------------|----------|----------|---|----------------|--------|
| ENSG00000182013 | 5.13E-15 | -2.63127 | 1 | 1 PNMAL1       | K12581 |
| ENSG00000182021 | 5.13E-15 | -2.63127 | 1 | 1 RP11-381O7.3 | -      |
| ENSG00000182035 | 5.13E-15 | -2.63127 | 1 | 1 ADIG         | -      |
| ENSG00000182048 | 5.13E-15 | -2.63127 | 1 | 1 TRPC2        | K04965 |
| ENSG00000182050 | 5.13E-15 | -2.63127 | 1 | 1 MGAT4C       | -      |
| ENSG00000182053 | 5.13E-15 | -2.63127 | 1 | 1 TRIM49B      | K12019 |
| ENSG00000182070 | 5.13E-15 | -2.63127 | 1 | 1 OR52A1       | K04257 |
| ENSG00000182077 | 5.13E-15 | -2.63127 | 1 | 1 PTCHD3       | -      |
| ENSG00000182083 | 5.13E-15 | -2.63127 | 1 | 1 OR6B2        | K04257 |
| ENSG00000182103 | 5.13E-15 | -2.63127 | 1 | 1 FAM181B      | -      |
| ENSG00000182107 | 5.13E-15 | -2.63127 | 1 | 1 TMEM30B      | -      |
| ENSG00000182111 | 5.13E-15 | -2.63127 | 1 | 1 ZNF716       | K09228 |
| ENSG00000182118 | 5.13E-15 | -2.63127 | 1 | 1 FAM89A       | -      |
| ENSG00000182132 | 5.13E-15 | -2.63127 | 1 | 1 KCNIP1       | -      |
| ENSG00000182156 | 5.13E-15 | -2.63127 | 1 | 1 ENPP7        | K12354 |
| ENSG00000182165 | 5.13E-15 | -2.63127 | 1 | 1 TP53TG1      | -      |
| ENSG00000182170 | 5.13E-15 | -2.63127 | 1 | 1 MRGPRG       | K08395 |
| ENSG00000182175 | 5.13E-15 | -2.63127 | 1 | 1 RGMA         | K06847 |
| ENSG00000182177 | 5.13E-15 | -2.63127 | 1 | 1 ASB18        | K10340 |
| ENSG00000182183 | 5.13E-15 | -2.63127 | 1 | 1 FAM159A      | -      |
| ENSG00000182187 | 5.13E-15 | -2.63127 | 1 | 1 CRYGB        | -      |
| ENSG00000182223 | 5.13E-15 | -2.63127 | 1 | 1 ZAR1         | K18762 |
| ENSG00000182242 | 5.13E-15 | -2.63127 | 1 | 1 TEX28P1      | -      |
| ENSG00000182255 | 5.13E-15 | -2.63127 | 1 | 1 KCNA4        | K04877 |
| ENSG00000182256 | 5.13E-15 | -2.63127 | 1 | 1 GABRG3       | K05186 |
| ENSG00000182271 | 5.13E-15 | -2.63127 | 1 | 1 TMIGD1       | -      |
| ENSG00000182315 | 5.13E-15 | -2.63127 | 1 | 1 MBD3L3       | -      |
| ENSG00000182329 | 5.13E-15 | -2.63127 | 1 | 1 AC079354.1   | K17985 |
| ENSG00000182330 | 5.13E-15 | -2.63127 | 1 | 1 PRAMEF8      | -      |
| ENSG00000182334 | 5.13E-15 | -2.63127 | 1 | 1 OR5P3        | K04257 |
| ENSG00000182346 | 5.13E-15 | -2.63127 | 1 | 1 DAOA         | -      |
| ENSG00000182347 | 5.13E-15 | -2.63127 | 1 | 1 RP11-39K24.9 | K12504 |
| ENSG00000182348 | 5.13E-15 | -2.63127 | 1 | 1 ZNF804B      | K00012 |
| ENSG00000182351 | 5.13E-15 | -2.63127 | 1 | 1 CRIP1P4      | -      |
| ENSG00000182352 | 5.13E-15 | -2.63127 | 1 | 1 C17orf77     | K09228 |
| ENSG00000182365 | 5.13E-15 | -2.63127 | 1 | 1 OR5F2P       | K04257 |
| ENSG00000182366 | 5.13E-15 | -2.63127 | 1 | 1 FAM87A       | -      |
| ENSG00000182383 | 5.13E-15 | -2.63127 | 1 | 1 RPL27AP5     | K02900 |
| ENSG00000182393 | 5.13E-15 | -2.63127 | 1 | 1 IFNL1        | K05447 |
| ENSG00000182397 | 5.13E-15 | -2.63127 | 1 | 1 DNMI1P46     | K01528 |
| ENSG00000182415 | 5.13E-15 | -2.63127 | 1 | 1 CDY2A        | K00653 |
| ENSG00000182447 | 5.13E-15 | -2.63127 | 1 | 1 OTOL1        | -      |
| ENSG00000182477 | 5.13E-15 | -2.63127 | 1 | 1 OR2B8P       | K04257 |
| ENSG00000182487 | 5.13E-15 | -2.63127 | 1 | 1 NCF1B        | K08011 |
| ENSG00000182489 | 5.13E-15 | -2.63127 | 1 | 1 XKRX         | -      |
| ENSG00000182492 | 5.13E-15 | -2.63127 | 1 | 1 BGN          | K08118 |
| ENSG00000182502 | 5.13E-15 | -2.63127 | 1 | 1 ABHD17AP5    | -      |
| ENSG00000182508 | 5.13E-15 | -2.63127 | 1 | 1 LHFPL1       | -      |
| ENSG00000182521 | 5.13E-15 | -2.63127 | 1 | 1 TBPL2        | K03120 |
| ENSG00000182531 | 5.13E-15 | -2.63127 | 1 | 1 OR7E115P     | K04257 |
| ENSG00000182565 | 5.13E-15 | -2.63127 | 1 | 1 OR4C2P       | K04257 |
| ENSG00000182566 | 5.13E-15 | -2.63127 | 1 | 1 CLEC4G       | K10061 |
| ENSG00000182568 | 5.13E-15 | -2.63127 | 1 | 1 SATB1        | -      |
| ENSG00000182572 | 5.13E-15 | -2.63127 | 1 | 1 HIST1H3I     | K11253 |
| ENSG00000182574 | 5.13E-15 | -2.63127 | 1 | 1 RP3-341D10.1 | K00746 |
| ENSG00000182575 | 5.13E-15 | -2.63127 | 1 | 1 NXPH3        | K16658 |
| ENSG00000182583 | 5.13E-15 | -2.63127 | 1 | 1 VCX          | -      |
| ENSG00000182586 | 5.13E-15 | -2.63127 | 1 | 1 LINC00334    | -      |

|                 |          |          |   |                 |        |
|-----------------|----------|----------|---|-----------------|--------|
| ENSG00000182591 | 5.13E-15 | -2.63127 | 1 | 1 KRTAP11-1     | -      |
| ENSG00000182601 | 5.13E-15 | -2.63127 | 1 | 1 HS3ST4        | K09678 |
| ENSG00000182613 | 5.13E-15 | -2.63127 | 1 | 1 OR2V2         | K04257 |
| ENSG00000182631 | 5.13E-15 | -2.63127 | 1 | 1 RXFP3         | K08397 |
| ENSG00000182632 | 5.13E-15 | -2.63127 | 1 | 1 CCNYL2        | K04237 |
| ENSG00000182634 | 5.13E-15 | -2.63127 | 1 | 1 OR10G7        | K04257 |
| ENSG00000182636 | 5.13E-15 | -2.63127 | 1 | 1 NDN           | K19482 |
| ENSG00000182645 | 5.13E-15 | -2.63127 | 1 | 1 CCDC172       | -      |
| ENSG00000182648 | 5.13E-15 | -2.63127 | 1 | 1 LINC01006     | -      |
| ENSG00000182652 | 5.13E-15 | -2.63127 | 1 | 1 OR4Q3         | K04257 |
| ENSG00000182667 | 5.13E-15 | -2.63127 | 1 | 1 NTM           | K06774 |
| ENSG00000182674 | 5.13E-15 | -2.63127 | 1 | 1 KCNB2         | K04886 |
| ENSG00000182698 | 5.13E-15 | -2.63127 | 1 | 1 RESP18        | -      |
| ENSG00000182707 | 5.13E-15 | -2.63127 | 1 | 1 FXYD6P3       | K13363 |
| ENSG00000182712 | 5.13E-15 | -2.63127 | 1 | 1 CMC4          | -      |
| ENSG00000182722 | 5.13E-15 | -2.63127 | 1 | 1 SEPHS1P1      | K01008 |
| ENSG00000182732 | 5.13E-15 | -2.63127 | 1 | 1 RGS6          | K16449 |
| ENSG00000182747 | 5.13E-15 | -2.63127 | 1 | 1 SLC35D3       | K15281 |
| ENSG00000182771 | 5.13E-15 | -2.63127 | 1 | 1 GRID1         | K05206 |
| ENSG00000182776 | 5.13E-15 | -2.63127 | 1 | 1 RP11-114H20.1 | -      |
| ENSG00000182783 | 5.13E-15 | -2.63127 | 1 | 1 OR2T29        | K04257 |
| ENSG00000182793 | 5.13E-15 | -2.63127 | 1 | 1 GSTA5         | K00799 |
| ENSG00000182798 | 5.13E-15 | -2.63127 | 1 | 1 MAGEB17       | -      |
| ENSG00000182816 | 5.13E-15 | -2.63127 | 1 | 1 KRTAP13-2     | -      |
| ENSG00000182836 | 5.13E-15 | -2.63127 | 1 | 1 PLCXD3        | -      |
| ENSG00000182854 | 5.13E-15 | -2.63127 | 1 | 1 OR4F15        | K04257 |
| ENSG00000182888 | 5.13E-15 | -2.63127 | 1 | 1 RP11-558O12.1 | K02977 |
| ENSG00000182896 | 5.13E-15 | -2.63127 | 1 | 1 TMEM95        | -      |
| ENSG00000182898 | 5.13E-15 | -2.63127 | 1 | 1 TCHHL1        | -      |
| ENSG00000182903 | 5.13E-15 | -2.63127 | 1 | 1 ZNF721        | K09228 |
| ENSG00000182912 | 5.13E-15 | -2.63127 | 1 | 1 C21orf90      | K12581 |
| ENSG00000182916 | 5.13E-15 | -2.63127 | 1 | 1 TCEAL7        | -      |
| ENSG00000182921 | 5.13E-15 | -2.63127 | 1 | 1 CCDC75P1      | -      |
| ENSG00000182931 | 5.13E-15 | -2.63127 | 1 | 1 WFDC10B       | -      |
| ENSG00000182938 | 5.13E-15 | -2.63127 | 1 | 1 OTOP3         | -      |
| ENSG00000182965 | 5.13E-15 | -2.63127 | 1 | 1 NPM1P14       | K11276 |
| ENSG00000182968 | 5.13E-15 | -2.63127 | 1 | 1 SOX1          | K09267 |
| ENSG00000182974 | 5.13E-15 | -2.63127 | 1 | 1 OR4M2         | K04257 |
| ENSG00000183019 | 5.13E-15 | -2.63127 | 1 | 1 C19orf59      | -      |
| ENSG00000183022 | 5.13E-15 | -2.63127 | 1 | 1 TPM3P8        | K09290 |
| ENSG00000183023 | 5.13E-15 | -2.63127 | 1 | 1 SLC8A1        | K05849 |
| ENSG00000183024 | 5.13E-15 | -2.63127 | 1 | 1 OR1G1         | K04257 |
| ENSG00000183034 | 5.13E-15 | -2.63127 | 1 | 1 OTOP2         | -      |
| ENSG00000183035 | 5.13E-15 | -2.63127 | 1 | 1 CYLC1         | -      |
| ENSG00000183036 | 5.13E-15 | -2.63127 | 1 | 1 PCP4          | -      |
| ENSG00000183038 | 5.13E-15 | -2.63127 | 1 | 1 GGTL3         | K18592 |
| ENSG00000183067 | 5.13E-15 | -2.63127 | 1 | 1 IGSF5         | K06786 |
| ENSG00000183086 | 5.13E-15 | -2.63127 | 1 | 1 GATSL1        | -      |
| ENSG00000183090 | 5.13E-15 | -2.63127 | 1 | 1 FREM3         | -      |
| ENSG00000183098 | 5.13E-15 | -2.63127 | 1 | 1 GPC6          | K08112 |
| ENSG00000183103 | 5.13E-15 | -2.63127 | 1 | 1 LYPD4         | -      |
| ENSG00000183114 | 5.13E-15 | -2.63127 | 1 | 1 FAM43B        | K15688 |
| ENSG00000183122 | 5.13E-15 | -2.63127 | 1 | 1 OR2A3P        | K04257 |
| ENSG00000183130 | 5.13E-15 | -2.63127 | 1 | 1 OR2T11        | K04257 |
| ENSG00000183145 | 5.13E-15 | -2.63127 | 1 | 1 RIPPLY3       | K17985 |
| ENSG00000183146 | 5.13E-15 | -2.63127 | 1 | 1 CYorf17       | -      |
| ENSG00000183148 | 5.13E-15 | -2.63127 | 1 | 1 ANKRD20A2     | K17299 |
| ENSG00000183154 | 5.13E-15 | -2.63127 | 1 | 1 RP11-863K10.7 | -      |

|                 |          |          |   |                 |               |
|-----------------|----------|----------|---|-----------------|---------------|
| ENSG00000183160 | 5.13E-15 | -2.63127 | 1 | 1 TMEM119       | -             |
| ENSG00000183166 | 5.13E-15 | -2.63127 | 1 | 1 CALN1         | -             |
| ENSG00000183171 | 5.13E-15 | -2.63127 | 1 | 1 RP11-49C9.2   | -             |
| ENSG00000183206 | 5.13E-15 | -2.63127 | 1 | 1 POTEK         | K17299        |
| ENSG00000183239 | 5.13E-15 | -2.63127 | 1 | 1 RP5-1120P11.4 | K02905        |
| ENSG00000183242 | 5.13E-15 | -2.63127 | 1 | 1 WT1-AS        | -             |
| ENSG00000183246 | 5.13E-15 | -2.63127 | 1 | 1 RIMBP3C       | K04552        |
| ENSG00000183249 | 5.13E-15 | -2.63127 | 1 | 1 NF1P3         | K08052        |
| ENSG00000183251 | 5.13E-15 | -2.63127 | 1 | 1 OR51B4        | K04257        |
| ENSG00000183269 | 5.13E-15 | -2.63127 | 1 | 1 OR52E8        | K04257        |
| ENSG00000183273 | 5.13E-15 | -2.63127 | 1 | 1 CCDC60        | -             |
| ENSG00000183287 | 5.13E-15 | -2.63127 | 1 | 1 CCBE1         | K19638        |
| ENSG00000183292 | 5.13E-15 | -2.63127 | 1 | 1 AC140481.2    | K09628        |
| ENSG00000183303 | 5.13E-15 | -2.63127 | 1 | 1 OR5P2         | K04257        |
| ENSG00000183304 | 5.13E-15 | -2.63127 | 1 | 1 FAM9A         | K19528        |
| ENSG00000183308 | 5.13E-15 | -2.63127 | 1 | 1 AC005037.3    | -             |
| ENSG00000183310 | 5.13E-15 | -2.63127 | 1 | 1 OR2T34        | K04257        |
| ENSG00000183313 | 5.13E-15 | -2.63127 | 1 | 1 OR52L1        | K04257        |
| ENSG00000183317 | 5.13E-15 | -2.63127 | 1 | 1 EPHA10        | K08897        |
| ENSG00000183318 | 5.13E-15 | -2.63127 | 1 | 1 SPDYE4        | K08694        |
| ENSG00000183336 | 5.13E-15 | -2.63127 | 1 | 1 BOLA2         | K15078        |
| ENSG00000183347 | 5.13E-15 | -2.63127 | 1 | 1 GBP6          | K15696        |
| ENSG00000183378 | 5.13E-15 | -2.63127 | 1 | 1 OVCH2         | -             |
| ENSG00000183385 | 5.13E-15 | -2.63127 | 1 | 1 TTTY8         | -             |
| ENSG00000183389 | 5.13E-15 | -2.63127 | 1 | 1 OR56A4        | K04257        |
| ENSG00000183432 | 5.13E-15 | -2.63127 | 1 | 1 ZBTB8OSP1     | -             |
| ENSG00000183434 | 5.13E-15 | -2.63127 | 1 | 1 TFDP3         | K09393        |
| ENSG00000183439 | 5.13E-15 | -2.63127 | 1 | 1 TRIM61        | K12029        |
| ENSG00000183454 | 5.13E-15 | -2.63127 | 1 | 1 GRIN2A        | K05209        |
| ENSG00000183461 | 5.13E-15 | -2.63127 | 1 | 1 XAGE1C        | -             |
| ENSG00000183463 | 5.13E-15 | -2.63127 | 1 | 1 URAD          | K13485        |
| ENSG00000183470 | 5.13E-15 | -2.63127 | 1 | 1 AC009365.3    | -             |
| ENSG00000183473 | 5.13E-15 | -2.63127 | 1 | 1 SSTR3         | K04219        |
| ENSG00000183476 | 5.13E-15 | -2.63127 | 1 | 1 SH2D7         | -             |
| ENSG00000183479 | 5.13E-15 | -2.63127 | 1 | 1 TREX2         | K16590        |
| ENSG00000183486 | 5.13E-15 | -2.63127 | 1 | 1 MX2           | K17985        |
| ENSG00000183504 | 5.13E-15 | -2.63127 | 1 | 1 AL132868.1    | -             |
| ENSG00000183514 | 5.13E-15 | -2.63127 | 1 | 1 TDGF1P2       | -             |
| ENSG00000183531 | 5.13E-15 | -2.63127 | 1 | 1 Z98256.1      | -             |
| ENSG00000183549 | 5.13E-15 | -2.63127 | 1 | 1 ACSM5         | K01896        |
| ENSG00000183558 | 5.13E-15 | -2.63127 | 1 | 1 HIST2H2AA3    | K11251        |
| ENSG00000183559 | 5.13E-15 | -2.63127 | 1 | 1 C10orf120     | -             |
| ENSG00000183560 | 5.13E-15 | -2.63127 | 1 | 1 FOLR4         | K13649        |
| ENSG00000183566 | 5.13E-15 | -2.63127 | 1 | 1 BPIFA4P       | -             |
| ENSG00000183578 | 5.13E-15 | -2.63127 | 1 | 1 TNFAIP8L3     | K17985        |
| ENSG00000183586 | 5.13E-15 | -2.63127 | 1 | 1 HMGN3P1       | K11301        |
| ENSG00000183598 | 5.13E-15 | -2.63127 | 1 | 1 HIST2H3D      | K11253        |
| ENSG00000183629 | 5.13E-15 | -2.63127 | 1 | 1 GOLGA8G       | K10595        |
| ENSG00000183631 | 5.13E-15 | -2.63127 | 1 | 1 CXorf64       | -             |
| ENSG00000183632 | 5.13E-15 | -2.63127 | 1 | 1 TP53TG3       | -             |
| ENSG00000183640 | 5.13E-15 | -2.63127 | 1 | 1 KRTAP8-1      | -             |
| ENSG00000183643 | 5.13E-15 | -2.63127 | 1 | 1 C15orf32      | -             |
| ENSG00000183644 | 5.13E-15 | -2.63127 | 1 | 1 C11orf88      | K17985        |
| ENSG00000183653 | 5.13E-15 | -2.63127 | 1 | 1 GRIK1-AS2     | K05201        |
| ENSG00000183654 | 5.13E-15 | -2.63127 | 1 | 1               | 11-Mar K10659 |
| ENSG00000183662 | 5.13E-15 | -2.63127 | 1 | 1 FAM19A1       | -             |
| ENSG00000183663 | 5.13E-15 | -2.63127 | 1 | 1 RP11-44N17.1  | K00134        |
| ENSG00000183675 | 5.13E-15 | -2.63127 | 1 | 1 PTPN20B       | K18039        |

|                 |          |          |   |                 |        |
|-----------------|----------|----------|---|-----------------|--------|
| ENSG00000183688 | 5.13E-15 | -2.63127 | 1 | 1 FAM101B       | K02927 |
| ENSG00000183695 | 5.13E-15 | -2.63127 | 1 | 1 MRGPRX2       | K08396 |
| ENSG00000183704 | 5.13E-15 | -2.63127 | 1 | 1 SLC9B1P1      | -      |
| ENSG00000183706 | 5.13E-15 | -2.63127 | 1 | 1 OR4N4         | K04257 |
| ENSG00000183709 | 5.13E-15 | -2.63127 | 1 | 1 IFNL2         | K05447 |
| ENSG00000183715 | 5.13E-15 | -2.63127 | 1 | 1 OPCML         | K06773 |
| ENSG00000183729 | 5.13E-15 | -2.63127 | 1 | 1 NPBWR1        | K05268 |
| ENSG00000183733 | 5.13E-15 | -2.63127 | 1 | 1 FIGLA         | K09066 |
| ENSG00000183734 | 5.13E-15 | -2.63127 | 1 | 1 ASCL2         | K09067 |
| ENSG00000183742 | 5.13E-15 | -2.63127 | 1 | 1 MACC1         | -      |
| ENSG00000183747 | 5.13E-15 | -2.63127 | 1 | 1 ACSM2A        | K01896 |
| ENSG00000183748 | 5.13E-15 | -2.63127 | 1 | 1 MRC1L1        | K06560 |
| ENSG00000183753 | 5.13E-15 | -2.63127 | 1 | 1 BPY2          | -      |
| ENSG00000183760 | 5.13E-15 | -2.63127 | 1 | 1 PAPL          | K12606 |
| ENSG00000183778 | 5.13E-15 | -2.63127 | 1 | 1 B3GALT5       | -      |
| ENSG00000183783 | 5.13E-15 | -2.63127 | 1 | 1 KCTD8         | -      |
| ENSG00000183784 | 5.13E-15 | -2.63127 | 1 | 1 C9orf66       | K06115 |
| ENSG00000183791 | 5.13E-15 | -2.63127 | 1 | 1 TCEB3C        | K15076 |
| ENSG00000183795 | 5.13E-15 | -2.63127 | 1 | 1 BPY2B         | -      |
| ENSG00000183807 | 5.13E-15 | -2.63127 | 1 | 1 FAM162B       | -      |
| ENSG00000183822 | 5.13E-15 | -2.63127 | 1 | 1 CTA-833B7.2   | -      |
| ENSG00000183833 | 5.13E-15 | -2.63127 | 1 | 1 MAATS1        | -      |
| ENSG00000183837 | 5.13E-15 | -2.63127 | 1 | 1 PNMA3         | -      |
| ENSG00000183850 | 5.13E-15 | -2.63127 | 1 | 1 ZNF730        | K09228 |
| ENSG00000183862 | 5.13E-15 | -2.63127 | 1 | 1 CNGA2         | K04949 |
| ENSG00000183873 | 5.13E-15 | -2.63127 | 1 | 1 SCN5A         | K04838 |
| ENSG00000183878 | 5.13E-15 | -2.63127 | 1 | 1 UTY           | K11447 |
| ENSG00000183888 | 5.13E-15 | -2.63127 | 1 | 1 C1orf64       | K17985 |
| ENSG00000183900 | 5.13E-15 | -2.63127 | 1 | 1 AC099522.1    | K09397 |
| ENSG00000183908 | 5.13E-15 | -2.63127 | 1 | 1 LRRC55        | K04174 |
| ENSG00000183909 | 5.13E-15 | -2.63127 | 1 | 1 OR4G2P        | K04257 |
| ENSG00000183911 | 5.13E-15 | -2.63127 | 1 | 1 RPL21P132     | K02889 |
| ENSG00000183914 | 5.13E-15 | -2.63127 | 1 | 1 DNAH2         | K10408 |
| ENSG00000183918 | 5.13E-15 | -2.63127 | 1 | 1 SH2D1A        | K07990 |
| ENSG00000183921 | 5.13E-15 | -2.63127 | 1 | 1 SDR42E2       | -      |
| ENSG00000183938 | 5.13E-15 | -2.63127 | 1 | 1 TRBV21OR9-2   | -      |
| ENSG00000183941 | 5.13E-15 | -2.63127 | 1 | 1 HIST2H4A      | K11254 |
| ENSG00000183960 | 5.13E-15 | -2.63127 | 1 | 1 KCNH8         | K04911 |
| ENSG00000183981 | 5.13E-15 | -2.63127 | 1 | 1 MAGEA13P      | -      |
| ENSG00000184005 | 5.13E-15 | -2.63127 | 1 | 1 ST6GALNAC3    | K03373 |
| ENSG00000184012 | 5.13E-15 | -2.63127 | 1 | 1 TMPRSS2       | K09633 |
| ENSG00000184022 | 5.13E-15 | -2.63127 | 1 | 1 OR2T10        | K04257 |
| ENSG00000184029 | 5.13E-15 | -2.63127 | 1 | 1 DSCR4         | -      |
| ENSG00000184032 | 5.13E-15 | -2.63127 | 1 | 1 KRTAP20-2     | -      |
| ENSG00000184055 | 5.13E-15 | -2.63127 | 1 | 1 OR7E87P       | K04257 |
| ENSG00000184106 | 5.13E-15 | -2.63127 | 1 | 1 TREML3P       | -      |
| ENSG00000184108 | 5.13E-15 | -2.63127 | 1 | 1 TRIML1        | K12038 |
| ENSG00000184115 | 5.13E-15 | -2.63127 | 1 | 1 RP13-1039J1.2 | -      |
| ENSG00000184139 | 5.13E-15 | -2.63127 | 1 | 1 RPL7AP28      | K02936 |
| ENSG00000184140 | 5.13E-15 | -2.63127 | 1 | 1 OR4F6         | K04257 |
| ENSG00000184144 | 5.13E-15 | -2.63127 | 1 | 1 CNTN2         | K06760 |
| ENSG00000184148 | 5.13E-15 | -2.63127 | 1 | 1 SPRR4         | -      |
| ENSG00000184155 | 5.13E-15 | -2.63127 | 1 | 1 OR10J5        | K04257 |
| ENSG00000184156 | 5.13E-15 | -2.63127 | 1 | 1 KCNQ3         | K04928 |
| ENSG00000184160 | 5.13E-15 | -2.63127 | 1 | 1 ADRA2C        | K04140 |
| ENSG00000184166 | 5.13E-15 | -2.63127 | 1 | 1 OR1D2         | K04257 |
| ENSG00000184188 | 5.13E-15 | -2.63127 | 1 | 1 CTC-512J14.7  | K05692 |
| ENSG00000184194 | 5.13E-15 | -2.63127 | 1 | 1 GPR173        | K04300 |

|                 |          |          |   |                 |        |
|-----------------|----------|----------|---|-----------------|--------|
| ENSG00000184205 | 5.13E-15 | -2.63127 | 1 | 1 TSPYL2        | K11285 |
| ENSG00000184210 | 5.13E-15 | -2.63127 | 1 | 1 DGAT2L6       | K11172 |
| ENSG00000184221 | 5.13E-15 | -2.63127 | 1 | 1 OLIG1         | K09085 |
| ENSG00000184247 | 5.13E-15 | -2.63127 | 1 | 1 AC100791.1    | -      |
| ENSG00000184258 | 5.13E-15 | -2.63127 | 1 | 1 CDR1          | -      |
| ENSG00000184260 | 5.13E-15 | -2.63127 | 1 | 1 HIST2H2AC     | K11251 |
| ENSG00000184270 | 5.13E-15 | -2.63127 | 1 | 1 HIST2H2AB     | K11251 |
| ENSG00000184274 | 5.13E-15 | -2.63127 | 1 | 1 LINC00315     | -      |
| ENSG00000184276 | 5.13E-15 | -2.63127 | 1 | 1 DEFB108B      | -      |
| ENSG00000184292 | 5.13E-15 | -2.63127 | 1 | 1 TACSTD2       | K17288 |
| ENSG00000184293 | 5.13E-15 | -2.63127 | 1 | 1 CLECL1        | K17518 |
| ENSG00000184302 | 5.13E-15 | -2.63127 | 1 | 1 SIX6          | K19473 |
| ENSG00000184303 | 5.13E-15 | -2.63127 | 1 | 1 DRD5P1        | K05840 |
| ENSG00000184304 | 5.13E-15 | -2.63127 | 1 | 1 PRKD1         | K06070 |
| ENSG00000184305 | 5.13E-15 | -2.63127 | 1 | 1 CCSER1        | -      |
| ENSG00000184313 | 5.13E-15 | -2.63127 | 1 | 1 MROH7         | -      |
| ENSG00000184321 | 5.13E-15 | -2.63127 | 1 | 1 OR51J1        | K04257 |
| ENSG00000184330 | 5.13E-15 | -2.63127 | 1 | 1 S100A7A       | -      |
| ENSG00000184344 | 5.13E-15 | -2.63127 | 1 | 1 GDF3          | K05495 |
| ENSG00000184345 | 5.13E-15 | -2.63127 | 1 | 1 IQCF2         | -      |
| ENSG00000184350 | 5.13E-15 | -2.63127 | 1 | 1 MRGPRE        | K08393 |
| ENSG00000184351 | 5.13E-15 | -2.63127 | 1 | 1 KRTAP19-1     | -      |
| ENSG00000184374 | 5.13E-15 | -2.63127 | 1 | 1 COLEC10       | K10065 |
| ENSG00000184385 | 5.13E-15 | -2.63127 | 1 | 1 C21orf128     | -      |
| ENSG00000184388 | 5.13E-15 | -2.63127 | 1 | 1 PABPC1L2B     | K13126 |
| ENSG00000184389 | 5.13E-15 | -2.63127 | 1 | 1 A3GALT2       | -      |
| ENSG00000184394 | 5.13E-15 | -2.63127 | 1 | 1 OR4N5         | K04257 |
| ENSG00000184408 | 5.13E-15 | -2.63127 | 1 | 1 KCND2         | K04892 |
| ENSG00000184423 | 5.13E-15 | -2.63127 | 1 | 1 AC090043.1    | K02893 |
| ENSG00000184454 | 5.13E-15 | -2.63127 | 1 | 1 NCMAP         | K11447 |
| ENSG00000184459 | 5.13E-15 | -2.63127 | 1 | 1 BPIFC         | -      |
| ENSG00000184478 | 5.13E-15 | -2.63127 | 1 | 1 OR56A3        | K04257 |
| ENSG00000184515 | 5.13E-15 | -2.63127 | 1 | 1 BEX5          | -      |
| ENSG00000184523 | 5.13E-15 | -2.63127 | 1 | 1 PTGER4P2      | K04261 |
| ENSG00000184560 | 5.13E-15 | -2.63127 | 1 | 1 C17orf74      | -      |
| ENSG00000184566 | 5.13E-15 | -2.63127 | 1 | 1 AC132216.1    | K15612 |
| ENSG00000184586 | 5.13E-15 | -2.63127 | 1 | 1 KRTAP7-1      | -      |
| ENSG00000184596 | 5.13E-15 | -2.63127 | 1 | 1 AF207550.1    | -      |
| ENSG00000184601 | 5.13E-15 | -2.63127 | 1 | 1 C14orf180     | -      |
| ENSG00000184608 | 5.13E-15 | -2.63127 | 1 | 1 C8orf12       | -      |
| ENSG00000184611 | 5.13E-15 | -2.63127 | 1 | 1 KCNH7         | K04910 |
| ENSG00000184612 | 5.13E-15 | -2.63127 | 1 | 1 RPL7P26       | K02937 |
| ENSG00000184613 | 5.13E-15 | -2.63127 | 1 | 1 NELL2         | -      |
| ENSG00000184616 | 5.13E-15 | -2.63127 | 1 | 1 AC004166.6    | K08694 |
| ENSG00000184617 | 5.13E-15 | -2.63127 | 1 | 1 ZNF840        | K09228 |
| ENSG00000184624 | 5.13E-15 | -2.63127 | 1 | 1 ZNF72P        | K09228 |
| ENSG00000184647 | 5.13E-15 | -2.63127 | 1 | 1 PRSS55        | K11447 |
| ENSG00000184650 | 5.13E-15 | -2.63127 | 1 | 1 ODF4          | -      |
| ENSG00000184659 | 5.13E-15 | -2.63127 | 1 | 1 FOXD4L4       | K09397 |
| ENSG00000184669 | 5.13E-15 | -2.63127 | 1 | 1 OR7E14P       | K04257 |
| ENSG00000184672 | 5.13E-15 | -2.63127 | 1 | 1 RALYL         | K12895 |
| ENSG00000184682 | 5.13E-15 | -2.63127 | 1 | 1 C11orf89      | -      |
| ENSG00000184698 | 5.13E-15 | -2.63127 | 1 | 1 OR51M1        | K04257 |
| ENSG00000184716 | 5.13E-15 | -2.63127 | 1 | 1 SERINC4       | -      |
| ENSG00000184724 | 5.13E-15 | -2.63127 | 1 | 1 KRTAP6-1      | -      |
| ENSG00000184741 | 5.13E-15 | -2.63127 | 1 | 1 OR5AQ1P       | K04257 |
| ENSG00000184761 | 5.13E-15 | -2.63127 | 1 | 1 AC013269.5    | K09628 |
| ENSG00000184774 | 5.13E-15 | -2.63127 | 1 | 1 RP11-480I12.4 | K01623 |

|                 |          |          |   |                 |        |
|-----------------|----------|----------|---|-----------------|--------|
| ENSG00000184789 | 5.13E-15 | -2.63127 | 1 | 1 OR4C10P       | K04257 |
| ENSG00000184795 | 5.13E-15 | -2.63127 | 1 | 1 UNC93B5       | K04257 |
| ENSG00000184809 | 5.13E-15 | -2.63127 | 1 | 1 C21orf88      | -      |
| ENSG00000184811 | 5.13E-15 | -2.63127 | 1 | 1 TUSC5         | -      |
| ENSG00000184814 | 5.13E-15 | -2.63127 | 1 | 1 PRR23B        | -      |
| ENSG00000184844 | 5.13E-15 | -2.63127 | 1 | 1 CYCSP45       | K08738 |
| ENSG00000184845 | 5.13E-15 | -2.63127 | 1 | 1 DRD1          | K04144 |
| ENSG00000184856 | 5.13E-15 | -2.63127 | 1 | 1 LINC00308     | -      |
| ENSG00000184860 | 5.13E-15 | -2.63127 | 1 | 1 SDR42E1       | -      |
| ENSG00000184867 | 5.13E-15 | -2.63127 | 1 | 1 ARMCX2        | -      |
| ENSG00000184879 | 5.13E-15 | -2.63127 | 1 | 1 RP11-7G23.8   | -      |
| ENSG00000184881 | 5.13E-15 | -2.63127 | 1 | 1 OR51B2        | K04257 |
| ENSG00000184895 | 5.13E-15 | -2.63127 | 1 | 1 SRY           | K09266 |
| ENSG00000184905 | 5.13E-15 | -2.63127 | 1 | 1 TCEAL2        | -      |
| ENSG00000184906 | 5.13E-15 | -2.63127 | 1 | 1 AC129778.2    | K13402 |
| ENSG00000184909 | 5.13E-15 | -2.63127 | 1 | 1 C1ORF220      | K09228 |
| ENSG00000184911 | 5.13E-15 | -2.63127 | 1 | 1 DMRTC1B       | K19494 |
| ENSG00000184933 | 5.13E-15 | -2.63127 | 1 | 1 OR6A2         | K04257 |
| ENSG00000184937 | 5.13E-15 | -2.63127 | 1 | 1 WT1           | K09234 |
| ENSG00000184945 | 5.13E-15 | -2.63127 | 1 | 1 AQP12A        | K09871 |
| ENSG00000184954 | 5.13E-15 | -2.63127 | 1 | 1 OR6C70        | K04257 |
| ENSG00000184961 | 5.13E-15 | -2.63127 | 1 | 1 AL772307.1    | K02936 |
| ENSG00000184986 | 5.13E-15 | -2.63127 | 1 | 1 TMEM121       | -      |
| ENSG00000184991 | 5.13E-15 | -2.63127 | 1 | 1 TTTY13        | -      |
| ENSG00000184999 | 5.13E-15 | -2.63127 | 1 | 1 SLC22A10      | K08206 |
| ENSG00000185002 | 5.13E-15 | -2.63127 | 1 | 1 RFX6          | K19521 |
| ENSG00000185008 | 5.13E-15 | -2.63127 | 1 | 1 ROBO2         | K06754 |
| ENSG00000185010 | 5.13E-15 | -2.63127 | 1 | 1 F8            | K03899 |
| ENSG00000185020 | 5.13E-15 | -2.63127 | 1 | 1 RP11-111G23.1 | -      |
| ENSG00000185028 | 5.13E-15 | -2.63127 | 1 | 1 LRRC14B       | -      |
| ENSG00000185031 | 5.13E-15 | -2.63127 | 1 | 1 SLC2A3P2      | K08142 |
| ENSG00000185037 | 5.13E-15 | -2.63127 | 1 | 1 ZNF733P       | K09228 |
| ENSG00000185040 | 5.13E-15 | -2.63127 | 1 | 1 AC004980.11   | K08694 |
| ENSG00000185041 | 5.13E-15 | -2.63127 | 1 | 1 RP11-321E2.6  | K03135 |
| ENSG00000185052 | 5.13E-15 | -2.63127 | 1 | 1 SLC24A3       | K13751 |
| ENSG00000185053 | 5.13E-15 | -2.63127 | 1 | 1 SGCZ          | -      |
| ENSG00000185056 | 5.13E-15 | -2.63127 | 1 | 1 C5orf47       | -      |
| ENSG00000185069 | 5.13E-15 | -2.63127 | 1 | 1 KRT76         | K07605 |
| ENSG00000185074 | 5.13E-15 | -2.63127 | 1 | 1 OR7E31P       | K04257 |
| ENSG00000185078 | 5.13E-15 | -2.63127 | 1 | 1 AC093698.1    | K02940 |
| ENSG00000185087 | 5.13E-15 | -2.63127 | 1 | 1 FAM169B       | -      |
| ENSG00000185097 | 5.13E-15 | -2.63127 | 1 | 1 OR4F16        | K04257 |
| ENSG00000185149 | 5.13E-15 | -2.63127 | 1 | 1 NPY2R         | K04205 |
| ENSG00000185155 | 5.13E-15 | -2.63127 | 1 | 1 MIXL1         | -      |
| ENSG00000185156 | 5.13E-15 | -2.63127 | 1 | 1 MFSD6L        | -      |
| ENSG00000185176 | 5.13E-15 | -2.63127 | 1 | 1 AQP12B        | K09871 |
| ENSG00000185177 | 5.13E-15 | -2.63127 | 1 | 1 ZNF479        | K09228 |
| ENSG00000185182 | 5.13E-15 | -2.63127 | 1 | 1 GOLGA8DP      | K10595 |
| ENSG00000185203 | 5.13E-15 | -2.63127 | 1 | 1 WASIR1        | -      |
| ENSG00000185221 | 5.13E-15 | -2.63127 | 1 | 1 GAPDHP24      | K00134 |
| ENSG00000185231 | 5.13E-15 | -2.63127 | 1 | 1 MC2R          | K04200 |
| ENSG00000185254 | 5.13E-15 | -2.63127 | 1 | 1 TEX28         | -      |
| ENSG00000185264 | 5.13E-15 | -2.63127 | 1 | 1 TEX33         | -      |
| ENSG00000185271 | 5.13E-15 | -2.63127 | 1 | 1 KLHL33        | K13957 |
| ENSG00000185272 | 5.13E-15 | -2.63127 | 1 | 1 RBM11         | -      |
| ENSG00000185274 | 5.13E-15 | -2.63127 | 1 | 1 WBSCR17       | K00710 |
| ENSG00000185290 | 5.13E-15 | -2.63127 | 1 | 1 NUPR1L        | -      |
| ENSG00000185294 | 5.13E-15 | -2.63127 | 1 | 1 SPPL2C        | K14212 |

|                 |          |          |   |              |        |
|-----------------|----------|----------|---|--------------|--------|
| ENSG00000185303 | 5.13E-15 | -2.63127 | 1 | 1 SFTPA2     | K10067 |
| ENSG00000185313 | 5.13E-15 | -2.63127 | 1 | 1 SCN10A     | K04842 |
| ENSG00000185319 | 5.13E-15 | -2.63127 | 1 | 1 SSXP4      | K15625 |
| ENSG00000185345 | 5.13E-15 | -2.63127 | 1 | 1 PARK2      | K04556 |
| ENSG00000185352 | 5.13E-15 | -2.63127 | 1 | 1 HS6ST3     | K08103 |
| ENSG00000185372 | 5.13E-15 | -2.63127 | 1 | 1 OR2V1      | K04257 |
| ENSG00000185385 | 5.13E-15 | -2.63127 | 1 | 1 OR7A17     | K04257 |
| ENSG00000185390 | 5.13E-15 | -2.63127 | 1 | 1 FGF7P2     | K04358 |
| ENSG00000185436 | 5.13E-15 | -2.63127 | 1 | 1 IFNLR1     | K05140 |
| ENSG00000185448 | 5.13E-15 | -2.63127 | 1 | 1 FAM47A     | -      |
| ENSG00000185477 | 5.13E-15 | -2.63127 | 1 | 1 GPRIN3     | -      |
| ENSG00000185479 | 5.13E-15 | -2.63127 | 1 | 1 KRT6B      | K07605 |
| ENSG00000185515 | 5.13E-15 | -2.63127 | 1 | 1 BRCC3      | K11864 |
| ENSG00000185518 | 5.13E-15 | -2.63127 | 1 | 1 SV2B       | K06258 |
| ENSG00000185554 | 5.13E-15 | -2.63127 | 1 | 1 NXF2       | K14284 |
| ENSG00000185594 | 5.13E-15 | -2.63127 | 1 | 1 SPATA8     | -      |
| ENSG00000185607 | 5.13E-15 | -2.63127 | 1 | 1 ACTBP7     | K05692 |
| ENSG00000185610 | 5.13E-15 | -2.63127 | 1 | 1 DBX2       | K09304 |
| ENSG00000185631 | 5.13E-15 | -2.63127 | 1 | 1 AC017079.3 | K02875 |
| ENSG00000185638 | 5.13E-15 | -2.63127 | 1 | 1 FTH1P14    | K00522 |
| ENSG00000185640 | 5.13E-15 | -2.63127 | 1 | 1 KRT79      | K07605 |
| ENSG00000185652 | 5.13E-15 | -2.63127 | 1 | 1 NTF3       | -      |
| ENSG00000185662 | 5.13E-15 | -2.63127 | 1 | 1 SMIM23     | -      |
| ENSG00000185668 | 5.13E-15 | -2.63127 | 1 | 1 POU3F1     | K09365 |
| ENSG00000185674 | 5.13E-15 | -2.63127 | 1 | 1 LYG2       | -      |
| ENSG00000185681 | 5.13E-15 | -2.63127 | 1 | 1 MORN5      | -      |
| ENSG00000185700 | 5.13E-15 | -2.63127 | 1 | 1 TTTY8B     | -      |
| ENSG00000185701 | 5.13E-15 | -2.63127 | 1 | 1 OR5M5P     | K04257 |
| ENSG00000185737 | 5.13E-15 | -2.63127 | 1 | 1 NRG3       | K05457 |
| ENSG00000185742 | 5.13E-15 | -2.63127 | 1 | 1 C11orf87   | -      |
| ENSG00000185751 | 5.13E-15 | -2.63127 | 1 | 1 XAGE2      | -      |
| ENSG00000185758 | 5.13E-15 | -2.63127 | 1 | 1 CLDN24     | K06087 |
| ENSG00000185760 | 5.13E-15 | -2.63127 | 1 | 1 KCNQ5      | K04930 |
| ENSG00000185811 | 5.13E-15 | -2.63127 | 1 | 1 IKZF1      | K09220 |
| ENSG00000185821 | 5.13E-15 | -2.63127 | 1 | 1 OR6C76     | K04257 |
| ENSG00000185823 | 5.13E-15 | -2.63127 | 1 | 1 NPAP1      | K01368 |
| ENSG00000185847 | 5.13E-15 | -2.63127 | 1 | 1 RP1-46F2.2 | -      |
| ENSG00000185863 | 5.13E-15 | -2.63127 | 1 | 1 TMEM210    | -      |
| ENSG00000185869 | 5.13E-15 | -2.63127 | 1 | 1 ZNF829     | K09228 |
| ENSG00000185873 | 5.13E-15 | -2.63127 | 1 | 1 TMPRSS11B  | K09751 |
| ENSG00000185888 | 5.13E-15 | -2.63127 | 1 | 1 PRSS38     | -      |
| ENSG00000185894 | 5.13E-15 | -2.63127 | 1 | 1 BPY2C      | -      |
| ENSG00000185897 | 5.13E-15 | -2.63127 | 1 | 1 FFAR3      | K04326 |
| ENSG00000185903 | 5.13E-15 | -2.63127 | 1 | 1 OR11N1P    | K04257 |
| ENSG00000185904 | 5.13E-15 | -2.63127 | 1 | 1 LINC00839  | -      |
| ENSG00000185905 | 5.13E-15 | -2.63127 | 1 | 1 C16orf54   | -      |
| ENSG00000185915 | 5.13E-15 | -2.63127 | 1 | 1 KLHL34     | K10469 |
| ENSG00000185926 | 5.13E-15 | -2.63127 | 1 | 1 OR4C46     | K04257 |
| ENSG00000185940 | 5.13E-15 | -2.63127 | 1 | 1 KRTAP5-5   | -      |
| ENSG00000185942 | 5.13E-15 | -2.63127 | 1 | 1 NKAIN3     | -      |
| ENSG00000185945 | 5.13E-15 | -2.63127 | 1 | 1 NXF2B      | K14284 |
| ENSG00000185960 | 5.13E-15 | -2.63127 | 1 | 1 SHOX       | K09331 |
| ENSG00000185962 | 5.13E-15 | -2.63127 | 1 | 1 LCE3A      | -      |
| ENSG00000185966 | 5.13E-15 | -2.63127 | 1 | 1 LCE3E      | -      |
| ENSG00000185972 | 5.13E-15 | -2.63127 | 1 | 1 CCIN       | -      |
| ENSG00000185974 | 5.13E-15 | -2.63127 | 1 | 1 GRK1       | K00909 |
| ENSG00000185978 | 5.13E-15 | -2.63127 | 1 | 1 H2AFB3     | K11251 |
| ENSG00000185982 | 5.13E-15 | -2.63127 | 1 | 1 DEFB128    | -      |

|                 |          |          |   |                  |        |
|-----------------|----------|----------|---|------------------|--------|
| ENSG00000185985 | 5.13E-15 | -2.63127 | 1 | 1 SLITRK2        | -      |
| ENSG00000186008 | 5.13E-15 | -2.63127 | 1 | 1 RPS4XP21       | K02987 |
| ENSG00000186009 | 5.13E-15 | -2.63127 | 1 | 1 ATP4B          | K01543 |
| ENSG00000186047 | 5.13E-15 | -2.63127 | 1 | 1 DLEU7          | -      |
| ENSG00000186049 | 5.13E-15 | -2.63127 | 1 | 1 KRT73          | K07605 |
| ENSG00000186051 | 5.13E-15 | -2.63127 | 1 | 1 TAL2           | K09068 |
| ENSG00000186074 | 5.13E-15 | -2.63127 | 1 | 1 CD300LF        | -      |
| ENSG00000186075 | 5.13E-15 | -2.63127 | 1 | 1 ZPBP2          | -      |
| ENSG00000186081 | 5.13E-15 | -2.63127 | 1 | 1 KRT5           | K07605 |
| ENSG00000186082 | 5.13E-15 | -2.63127 | 1 | 1 KRT18P14       | K07604 |
| ENSG00000186088 | 5.13E-15 | -2.63127 | 1 | 1 GSAP           | -      |
| ENSG00000186090 | 5.13E-15 | -2.63127 | 1 | 1 HTR3D          | K04819 |
| ENSG00000186092 | 5.13E-15 | -2.63127 | 1 | 1 OR4F5          | K04257 |
| ENSG00000186094 | 5.13E-15 | -2.63127 | 1 | 1 AGBL4          | -      |
| ENSG00000186103 | 5.13E-15 | -2.63127 | 1 | 1 ARGFX          | -      |
| ENSG00000186104 | 5.13E-15 | -2.63127 | 1 | 1 CYP2R1         | K07419 |
| ENSG00000186113 | 5.13E-15 | -2.63127 | 1 | 1 OR5D14         | K04257 |
| ENSG00000186115 | 5.13E-15 | -2.63127 | 1 | 1 CYP4F2         | K17726 |
| ENSG00000186117 | 5.13E-15 | -2.63127 | 1 | 1 OR5L1          | K04257 |
| ENSG00000186118 | 5.13E-15 | -2.63127 | 1 | 1 TEX38          | -      |
| ENSG00000186119 | 5.13E-15 | -2.63127 | 1 | 1 OR5D18         | K04257 |
| ENSG00000186124 | 5.13E-15 | -2.63127 | 1 | 1 OR9M1P         | K04257 |
| ENSG00000186136 | 5.13E-15 | -2.63127 | 1 | 1 TAS2R42        | K08474 |
| ENSG00000186143 | 5.13E-15 | -2.63127 | 1 | 1 C2orf53        | -      |
| ENSG00000186146 | 5.13E-15 | -2.63127 | 1 | 1 DEFB131        | K10803 |
| ENSG00000186148 | 5.13E-15 | -2.63127 | 1 | 1 AC013271.3     | -      |
| ENSG00000186152 | 5.13E-15 | -2.63127 | 1 | 1 LILRP1         | K06512 |
| ENSG00000186163 | 5.13E-15 | -2.63127 | 1 | 1 U66059.29      | -      |
| ENSG00000186188 | 5.13E-15 | -2.63127 | 1 | 1 FFAR4          | K08425 |
| ENSG00000186190 | 5.13E-15 | -2.63127 | 1 | 1 BPIFB3         | -      |
| ENSG00000186191 | 5.13E-15 | -2.63127 | 1 | 1 BPIFB4         | -      |
| ENSG00000186212 | 5.13E-15 | -2.63127 | 1 | 1 SOWAHB         | -      |
| ENSG00000186223 | 5.13E-15 | -2.63127 | 1 | 1 SSU72P4        | K15544 |
| ENSG00000186226 | 5.13E-15 | -2.63127 | 1 | 1 LCE1E          | -      |
| ENSG00000186231 | 5.13E-15 | -2.63127 | 1 | 1 KLHL32         | K10468 |
| ENSG00000186232 | 5.13E-15 | -2.63127 | 1 | 1 SSU72P3        | K15544 |
| ENSG00000186234 | 5.13E-15 | -2.63127 | 1 | 1 FAM86MP        | K12354 |
| ENSG00000186235 | 5.13E-15 | -2.63127 | 1 | 1 AC016757.3     | -      |
| ENSG00000186244 | 5.13E-15 | -2.63127 | 1 | 1 RP11-1079K10.1 | K02889 |
| ENSG00000186265 | 5.13E-15 | -2.63127 | 1 | 1 BTLA           | K06707 |
| ENSG00000186268 | 5.13E-15 | -2.63127 | 1 | 1 OR10D4P        | K04257 |
| ENSG00000186280 | 5.13E-15 | -2.63127 | 1 | 1 KDM4D          | K06709 |
| ENSG00000186288 | 5.13E-15 | -2.63127 | 1 | 1 PABPC1L2A      | K13126 |
| ENSG00000186297 | 5.13E-15 | -2.63127 | 1 | 1 GABRA5         | K05175 |
| ENSG00000186306 | 5.13E-15 | -2.63127 | 1 | 1 OR10T2         | K04257 |
| ENSG00000186310 | 5.13E-15 | -2.63127 | 1 | 1 NAP1L3         | K11281 |
| ENSG00000186322 | 5.13E-15 | -2.63127 | 1 | 1 GOLGA6L17P     | K10595 |
| ENSG00000186328 | 5.13E-15 | -2.63127 | 1 | 1 RP11-140K17.2  | -      |
| ENSG00000186329 | 5.13E-15 | -2.63127 | 1 | 1 TMEM212        | -      |
| ENSG00000186334 | 5.13E-15 | -2.63127 | 1 | 1 SLC36A3        | K14209 |
| ENSG00000186335 | 5.13E-15 | -2.63127 | 1 | 1 SLC36A2        | K14209 |
| ENSG00000186367 | 5.13E-15 | -2.63127 | 1 | 1 KIAA1024L      | K15696 |
| ENSG00000186369 | 5.13E-15 | -2.63127 | 1 | 1 LINC00643      | -      |
| ENSG00000186399 | 5.13E-15 | -2.63127 | 1 | 1 GOLGA8R        | K10595 |
| ENSG00000186400 | 5.13E-15 | -2.63127 | 1 | 1 OR10X1         | K04257 |
| ENSG00000186407 | 5.13E-15 | -2.63127 | 1 | 1 CD300E         | K06719 |
| ENSG00000186431 | 5.13E-15 | -2.63127 | 1 | 1 FCAR           | K06513 |
| ENSG00000186439 | 5.13E-15 | -2.63127 | 1 | 1 TRDN           | -      |



|                 |          |          |   |                |        |
|-----------------|----------|----------|---|----------------|--------|
| ENSG00000186440 | 5.13E-15 | -2.63127 | 1 | 1 OR6P1        | K04257 |
| ENSG00000186446 | 5.13E-15 | -2.63127 | 1 | 1 ZNF501       | K09228 |
| ENSG00000186452 | 5.13E-15 | -2.63127 | 1 | 1 TMPRSS12     | -      |
| ENSG00000186453 | 5.13E-15 | -2.63127 | 1 | 1 FAM228A      | -      |
| ENSG00000186458 | 5.13E-15 | -2.63127 | 1 | 1 DEFB132      | -      |
| ENSG00000186462 | 5.13E-15 | -2.63127 | 1 | 1 NAP1L2       | K11280 |
| ENSG00000186469 | 5.13E-15 | -2.63127 | 1 | 1 GNG2         | -      |
| ENSG00000186472 | 5.13E-15 | -2.63127 | 1 | 1 PCLO         | K16882 |
| ENSG00000186474 | 5.13E-15 | -2.63127 | 1 | 1 KLK12        | K09621 |
| ENSG00000186479 | 5.13E-15 | -2.63127 | 1 | 1 RGS7BP       | -      |
| ENSG00000186481 | 5.13E-15 | -2.63127 | 1 | 1 ANKRD20A5P   | K17299 |
| ENSG00000186493 | 5.13E-15 | -2.63127 | 1 | 1 C5orf38      | -      |
| ENSG00000186496 | 5.13E-15 | -2.63127 | 1 | 1 ZNF396       | K09230 |
| ENSG00000186508 | 5.13E-15 | -2.63127 | 1 | 1 OR9I2P       | K04257 |
| ENSG00000186509 | 5.13E-15 | -2.63127 | 1 | 1 OR9Q1        | K04257 |
| ENSG00000186513 | 5.13E-15 | -2.63127 | 1 | 1 OR9Q2        | K04257 |
| ENSG00000186526 | 5.13E-15 | -2.63127 | 1 | 1 CYP4F8       | -      |
| ENSG00000186530 | 5.13E-15 | -2.63127 | 1 | 1 XKR5         | -      |
| ENSG00000186543 | 5.13E-15 | -2.63127 | 1 | 1 CROCCP5      | K16469 |
| ENSG00000186562 | 5.13E-15 | -2.63127 | 1 | 1 DEFB105A     | -      |
| ENSG00000186572 | 5.13E-15 | -2.63127 | 1 | 1 DEFB107A     | -      |
| ENSG00000186579 | 5.13E-15 | -2.63127 | 1 | 1 DEFB106A     | -      |
| ENSG00000186583 | 5.13E-15 | -2.63127 | 1 | 1 SPATC1       | -      |
| ENSG00000186599 | 5.13E-15 | -2.63127 | 1 | 1 DEFB105B     | -      |
| ENSG00000186675 | 5.13E-15 | -2.63127 | 1 | 1 MAGEE2       | -      |
| ENSG00000186678 | 5.13E-15 | -2.63127 | 1 | 1 RP11-266I3.7 | -      |
| ENSG00000186723 | 5.13E-15 | -2.63127 | 1 | 1 OR10H1       | K04257 |
| ENSG00000186732 | 5.13E-15 | -2.63127 | 1 | 1 MPPED1       | -      |
| ENSG00000186743 | 5.13E-15 | -2.63127 | 1 | 1 TPI1P3       | K01803 |
| ENSG00000186766 | 5.13E-15 | -2.63127 | 1 | 1 FOXI2        | K09401 |
| ENSG00000186777 | 5.13E-15 | -2.63127 | 1 | 1 ZNF732       | K09228 |
| ENSG00000186788 | 5.13E-15 | -2.63127 | 1 | 1 SPATA31D3    | -      |
| ENSG00000186795 | 5.13E-15 | -2.63127 | 1 | 1 KCNK18       | -      |
| ENSG00000186803 | 5.13E-15 | -2.63127 | 1 | 1 IFNA10       | K05414 |
| ENSG00000186810 | 5.13E-15 | -2.63127 | 1 | 1 CXCR3        | K04188 |
| ENSG00000186818 | 5.13E-15 | -2.63127 | 1 | 1 LILRB4       | K06512 |
| ENSG00000186825 | 5.13E-15 | -2.63127 | 1 | 1 C2orf27B     | -      |
| ENSG00000186827 | 5.13E-15 | -2.63127 | 1 | 1 TNFRSF4      | K05142 |
| ENSG00000186838 | 5.13E-15 | -2.63127 | 1 | 1 SELV         | -      |
| ENSG00000186844 | 5.13E-15 | -2.63127 | 1 | 1 LCE1A        | -      |
| ENSG00000186860 | 5.13E-15 | -2.63127 | 1 | 1 KRTAP17-1    | -      |
| ENSG00000186867 | 5.13E-15 | -2.63127 | 1 | 1 QRFPR        | K08378 |
| ENSG00000186881 | 5.13E-15 | -2.63127 | 1 | 1 OR13F1       | K04257 |
| ENSG00000186886 | 5.13E-15 | -2.63127 | 1 | 1 OR5D3P       | K04257 |
| ENSG00000186889 | 5.13E-15 | -2.63127 | 1 | 1 TMEM17       | K19384 |
| ENSG00000186895 | 5.13E-15 | -2.63127 | 1 | 1 FGF3         | K04358 |
| ENSG00000186910 | 5.13E-15 | -2.63127 | 1 | 1 SERPINA11    | K04525 |
| ENSG00000186912 | 5.13E-15 | -2.63127 | 1 | 1 P2RY4        | K04271 |
| ENSG00000186924 | 5.13E-15 | -2.63127 | 1 | 1 KRTAP22-1    | -      |
| ENSG00000186925 | 5.13E-15 | -2.63127 | 1 | 1 KRTAP19-6    | -      |
| ENSG00000186930 | 5.13E-15 | -2.63127 | 1 | 1 KRTAP6-2     | -      |
| ENSG00000186943 | 5.13E-15 | -2.63127 | 1 | 1 OR13C8       | K04257 |
| ENSG00000186960 | 5.13E-15 | -2.63127 | 1 | 1 C14orf23     | -      |
| ENSG00000186965 | 5.13E-15 | -2.63127 | 1 | 1 KRTAP19-2    | -      |
| ENSG00000186967 | 5.13E-15 | -2.63127 | 1 | 1 KRTAP19-4    | -      |
| ENSG00000186970 | 5.13E-15 | -2.63127 | 1 | 1 KRTAP15-1    | -      |
| ENSG00000186971 | 5.13E-15 | -2.63127 | 1 | 1 KRTAP13-4    | -      |
| ENSG00000186973 | 5.13E-15 | -2.63127 | 1 | 1 FAM183A      | -      |

|                 |          |          |   |                 |        |
|-----------------|----------|----------|---|-----------------|--------|
| ENSG00000186980 | 5.13E-15 | -2.63127 | 1 | 1 KRTAP23-1     | -      |
| ENSG00000187003 | 5.13E-15 | -2.63127 | 1 | 1 ACTL7A        | -      |
| ENSG00000187005 | 5.13E-15 | -2.63127 | 1 | 1 KRTAP21-1     | -      |
| ENSG00000187012 | 5.13E-15 | -2.63127 | 1 | 1 LINC00207     | -      |
| ENSG00000187013 | 5.13E-15 | -2.63127 | 1 | 1 C17orf82      | -      |
| ENSG00000187021 | 5.13E-15 | -2.63127 | 1 | 1 PNLIPRP1      | K14074 |
| ENSG00000187026 | 5.13E-15 | -2.63127 | 1 | 1 KRTAP21-2     | -      |
| ENSG00000187033 | 5.13E-15 | -2.63127 | 1 | 1 SAMD7         | -      |
| ENSG00000187037 | 5.13E-15 | -2.63127 | 1 | 1 GPR141        | K08429 |
| ENSG00000187048 | 5.13E-15 | -2.63127 | 1 | 1 CYP4A11       | K17687 |
| ENSG00000187054 | 5.13E-15 | -2.63127 | 1 | 1 TMPRSS11A     | K09750 |
| ENSG00000187060 | 5.13E-15 | -2.63127 | 1 | 1 RP11-187C18.3 | K02936 |
| ENSG00000187068 | 5.13E-15 | -2.63127 | 1 | 1 C3orf70       | K17985 |
| ENSG00000187080 | 5.13E-15 | -2.63127 | 1 | 1 OR2AK2        | K04257 |
| ENSG00000187082 | 5.13E-15 | -2.63127 | 1 | 1 DEFB106B      | -      |
| ENSG00000187094 | 5.13E-15 | -2.63127 | 1 | 1 CCK           | K05226 |
| ENSG00000187103 | 5.13E-15 | -2.63127 | 1 | 1 FUNDC2P3      | -      |
| ENSG00000187116 | 5.13E-15 | -2.63127 | 1 | 1 LILRA5        | K06512 |
| ENSG00000187135 | 5.13E-15 | -2.63127 | 1 | 1 VSTM2B        | -      |
| ENSG00000187170 | 5.13E-15 | -2.63127 | 1 | 1 LCE4A         | -      |
| ENSG00000187172 | 5.13E-15 | -2.63127 | 1 | 1 BAGE2         | K09188 |
| ENSG00000187173 | 5.13E-15 | -2.63127 | 1 | 1 LCE2A         | -      |
| ENSG00000187175 | 5.13E-15 | -2.63127 | 1 | 1 KRTAP12-1     | -      |
| ENSG00000187180 | 5.13E-15 | -2.63127 | 1 | 1 LCE2C         | -      |
| ENSG00000187185 | 5.13E-15 | -2.63127 | 1 | 1 CTD-2600O9.1  | -      |
| ENSG00000187191 | 5.13E-15 | -2.63127 | 1 | 1 DAZ3          | -      |
| ENSG00000187210 | 5.13E-15 | -2.63127 | 1 | 1 GCNT1         | K00727 |
| ENSG00000187223 | 5.13E-15 | -2.63127 | 1 | 1 LCE2D         | -      |
| ENSG00000187238 | 5.13E-15 | -2.63127 | 1 | 1 LCE3B         | -      |
| ENSG00000187242 | 5.13E-15 | -2.63127 | 1 | 1 KRT12         | K07604 |
| ENSG00000187243 | 5.13E-15 | -2.63127 | 1 | 1 MAGED4B       | K12464 |
| ENSG00000187258 | 5.13E-15 | -2.63127 | 1 | 1 NPSR1         | K08376 |
| ENSG00000187272 | 5.13E-15 | -2.63127 | 1 | 1 KRTAP9-8      | -      |
| ENSG00000187323 | 5.13E-15 | -2.63127 | 1 | 1 DCC           | -      |
| ENSG00000187325 | 5.13E-15 | -2.63127 | 1 | 1 TAF9B         | K03133 |
| ENSG00000187372 | 5.13E-15 | -2.63127 | 1 | 1 PCDHB13       | K16494 |
| ENSG00000187391 | 5.13E-15 | -2.63127 | 1 | 1 MAGI2         | K05629 |
| ENSG00000187398 | 5.13E-15 | -2.63127 | 1 | 1 LUZP2         | -      |
| ENSG00000187461 | 5.13E-15 | -2.63127 | 1 | 1 AL583828.1    | -      |
| ENSG00000187472 | 5.13E-15 | -2.63127 | 1 | 1 RP11-67P15.1  | K02934 |
| ENSG00000187475 | 5.13E-15 | -2.63127 | 1 | 1 HIST1H1T      | K11275 |
| ENSG00000187481 | 5.13E-15 | -2.63127 | 1 | 1 HSD3BP1       | K00070 |
| ENSG00000187483 | 5.13E-15 | -2.63127 | 1 | 1 SERPINA13P    | K04525 |
| ENSG00000187504 | 5.13E-15 | -2.63127 | 1 | 1 RPL7P48       | K02937 |
| ENSG00000187510 | 5.13E-15 | -2.63127 | 1 | 1 PLEKHG7       | -      |
| ENSG00000187516 | 5.13E-15 | -2.63127 | 1 | 1 CXorf27       | -      |
| ENSG00000187527 | 5.13E-15 | -2.63127 | 1 | 1 ATP13A5       | K14951 |
| ENSG00000187533 | 5.13E-15 | -2.63127 | 1 | 1 C4orf40       | K05725 |
| ENSG00000187536 | 5.13E-15 | -2.63127 | 1 | 1 TPM3P7        | K09290 |
| ENSG00000187537 | 5.13E-15 | -2.63127 | 1 | 1 POTEM         | K17299 |
| ENSG00000187545 | 5.13E-15 | -2.63127 | 1 | 1 PRAMEF10      | -      |
| ENSG00000187546 | 5.13E-15 | -2.63127 | 1 | 1 AGMO          | K15537 |
| ENSG00000187553 | 5.13E-15 | -2.63127 | 1 | 1 CYP26C1       | K12665 |
| ENSG00000187559 | 5.13E-15 | -2.63127 | 1 | 1 FOXD4L3       | K09397 |
| ENSG00000187566 | 5.13E-15 | -2.63127 | 1 | 1 NHLRC1        | K10602 |
| ENSG00000187569 | 5.13E-15 | -2.63127 | 1 | 1 DPPA3         | -      |
| ENSG00000187581 | 5.13E-15 | -2.63127 | 1 | 1 COX8C         | K02273 |
| ENSG00000187589 | 5.13E-15 | -2.63127 | 1 | 1 TERF1P2       | K11110 |

|                 |          |          |   |                 |        |
|-----------------|----------|----------|---|-----------------|--------|
| ENSG00000187595 | 5.13E-15 | -2.63127 | 1 | 1 ZNF385C       | -      |
| ENSG00000187600 | 5.13E-15 | -2.63127 | 1 | 1 TMEM247       | -      |
| ENSG00000187612 | 5.13E-15 | -2.63127 | 1 | 1 OR5W2         | K04257 |
| ENSG00000187624 | 5.13E-15 | -2.63127 | 1 | 1 C17orf97      | -      |
| ENSG00000187657 | 5.13E-15 | -2.63127 | 1 | 1 TSPY13P       | K11284 |
| ENSG00000187658 | 5.13E-15 | -2.63127 | 1 | 1 C5orf52       | -      |
| ENSG00000187664 | 5.13E-15 | -2.63127 | 1 | 1 HAPLN4        | K06853 |
| ENSG00000187672 | 5.13E-15 | -2.63127 | 1 | 1 ERC2          | K16072 |
| ENSG00000187682 | 5.13E-15 | -2.63127 | 1 | 1 ERAS          | K17196 |
| ENSG00000187690 | 5.13E-15 | -2.63127 | 1 | 1 CXorf67       | -      |
| ENSG00000187701 | 5.13E-15 | -2.63127 | 1 | 1 OR2T27        | K04257 |
| ENSG00000187714 | 5.13E-15 | -2.63127 | 1 | 1 SLC18A3       | K14636 |
| ENSG00000187715 | 5.13E-15 | -2.63127 | 1 | 1 KBTBD12       | -      |
| ENSG00000187721 | 5.13E-15 | -2.63127 | 1 | 1 GTF2IP3       | K03121 |
| ENSG00000187730 | 5.13E-15 | -2.63127 | 1 | 1 GABRD         | K05184 |
| ENSG00000187733 | 5.13E-15 | -2.63127 | 1 | 1 AMY1C         | K01176 |
| ENSG00000187747 | 5.13E-15 | -2.63127 | 1 | 1 OR52B6        | K04257 |
| ENSG00000187754 | 5.13E-15 | -2.63127 | 1 | 1 SSX7          | K15625 |
| ENSG00000187758 | 5.13E-15 | -2.63127 | 1 | 1 ADH1A         | K13951 |
| ENSG00000187766 | 5.13E-15 | -2.63127 | 1 | 1 KRTAP10-8     | -      |
| ENSG00000187772 | 5.13E-15 | -2.63127 | 1 | 1 LIN28B        | K18754 |
| ENSG00000187773 | 5.13E-15 | -2.63127 | 1 | 1 FAM69C        | -      |
| ENSG00000187783 | 5.13E-15 | -2.63127 | 1 | 1 TMEM72        | -      |
| ENSG00000187786 | 5.13E-15 | -2.63127 | 1 | 1 SCXB          | K09070 |
| ENSG00000187806 | 5.13E-15 | -2.63127 | 1 | 1 TMEM202       | -      |
| ENSG00000187811 | 5.13E-15 | -2.63127 | 1 | 1 AP000867.1    | K04257 |
| ENSG00000187812 | 5.13E-15 | -2.63127 | 1 | 1 RP11-24M17.5  | -      |
| ENSG00000187815 | 5.13E-15 | -2.63127 | 1 | 1 ZFP69         | K09228 |
| ENSG00000187821 | 5.13E-15 | -2.63127 | 1 | 1 HELT          | -      |
| ENSG00000187823 | 5.13E-15 | -2.63127 | 1 | 1 ZCCHC16       | -      |
| ENSG00000187833 | 5.13E-15 | -2.63127 | 1 | 1 C2orf78       | -      |
| ENSG00000187847 | 5.13E-15 | -2.63127 | 1 | 1 OR7E25P       | K04257 |
| ENSG00000187855 | 5.13E-15 | -2.63127 | 1 | 1 ASCL4         | K09067 |
| ENSG00000187857 | 5.13E-15 | -2.63127 | 1 | 1 OR6C75        | K04257 |
| ENSG00000187870 | 5.13E-15 | -2.63127 | 1 | 1 RNFT1P3       | -      |
| ENSG00000187871 | 5.13E-15 | -2.63127 | 1 | 1 GFRAL         | K17985 |
| ENSG00000187889 | 5.13E-15 | -2.63127 | 1 | 1 C1orf168      | -      |
| ENSG00000187893 | 5.13E-15 | -2.63127 | 1 | 1 CXXC1P1       | -      |
| ENSG00000187900 | 5.13E-15 | -2.63127 | 1 | 1 OR5H7P        | K04257 |
| ENSG00000187904 | 5.13E-15 | -2.63127 | 1 | 1 AC097382.5    | -      |
| ENSG00000187918 | 5.13E-15 | -2.63127 | 1 | 1 OR51I2        | K04257 |
| ENSG00000187922 | 5.13E-15 | -2.63127 | 1 | 1 LCN10         | -      |
| ENSG00000187950 | 5.13E-15 | -2.63127 | 1 | 1 OVCH1         | -      |
| ENSG00000187959 | 5.13E-15 | -2.63127 | 1 | 1 CPSF4L        | K14404 |
| ENSG00000187969 | 5.13E-15 | -2.63127 | 1 | 1 ZCCHC13       | K09250 |
| ENSG00000187979 | 5.13E-15 | -2.63127 | 1 | 1 AC008079.9    | -      |
| ENSG00000187980 | 5.13E-15 | -2.63127 | 1 | 1 PLA2G2C       | K01047 |
| ENSG00000187988 | 5.13E-15 | -2.63127 | 1 | 1 RP11-405L18.2 | -      |
| ENSG00000187997 | 5.13E-15 | -2.63127 | 1 | 1 C17orf99      | -      |
| ENSG00000187999 | 5.13E-15 | -2.63127 | 1 | 1 HNRNPA1P61    | K12741 |
| ENSG00000188000 | 5.13E-15 | -2.63127 | 1 | 1 OR7D2         | K04257 |
| ENSG00000188011 | 5.13E-15 | -2.63127 | 1 | 1 CXXC11        | -      |
| ENSG00000188013 | 5.13E-15 | -2.63127 | 1 | 1 MEIS3P2       | K16671 |
| ENSG00000188029 | 5.13E-15 | -2.63127 | 1 | 1 CTSL3P        | K01365 |
| ENSG00000188038 | 5.13E-15 | -2.63127 | 1 | 1 NRN1L         | -      |
| ENSG00000188039 | 5.13E-15 | -2.63127 | 1 | 1 NWD1          | -      |
| ENSG00000188050 | 5.13E-15 | -2.63127 | 1 | 1 RNF133        | K15702 |
| ENSG00000188056 | 5.13E-15 | -2.63127 | 1 | 1 TREML4        | -      |

|                 |          |          |   |                   |        |
|-----------------|----------|----------|---|-------------------|--------|
| ENSG00000188069 | 5.13E-15 | -2.63127 | 1 | 1 OR51F1          | K04257 |
| ENSG00000188076 | 5.13E-15 | -2.63127 | 1 | 1 SCGB1C1         | -      |
| ENSG00000188078 | 5.13E-15 | -2.63127 | 1 | 1 RP5-1119A7.11   | -      |
| ENSG00000188086 | 5.13E-15 | -2.63127 | 1 | 1 PRSS45          | -      |
| ENSG00000188101 | 5.13E-15 | -2.63127 | 1 | 1 ALOX15P2        | K00460 |
| ENSG00000188120 | 5.13E-15 | -2.63127 | 1 | 1 DAZ1            | -      |
| ENSG00000188155 | 5.13E-15 | -2.63127 | 1 | 1 KRTAP10-6       | -      |
| ENSG00000188171 | 5.13E-15 | -2.63127 | 1 | 1 ZNF626          | K09228 |
| ENSG00000188219 | 5.13E-15 | -2.63127 | 1 | 1 POTE            | K17299 |
| ENSG00000188223 | 5.13E-15 | -2.63127 | 1 | 1 AC002398.9      | K06170 |
| ENSG00000188227 | 5.13E-15 | -2.63127 | 1 | 1 ZNF793          | K09228 |
| ENSG00000188269 | 5.13E-15 | -2.63127 | 1 | 1 OR7A5           | -      |
| ENSG00000188279 | 5.13E-15 | -2.63127 | 1 | 1 FAM25C          | -      |
| ENSG00000188280 | 5.13E-15 | -2.63127 | 1 | 1 FAM230A         | -      |
| ENSG00000188282 | 5.13E-15 | -2.63127 | 1 | 1 RUFY4           | K05050 |
| ENSG00000188295 | 5.13E-15 | -2.63127 | 1 | 1 ZNF669          | K09228 |
| ENSG00000188306 | 5.13E-15 | -2.63127 | 1 | 1 LRR1Q4          | -      |
| ENSG00000188314 | 5.13E-15 | -2.63127 | 1 | 1 OR7D1P          | K04257 |
| ENSG00000188324 | 5.13E-15 | -2.63127 | 1 | 1 OR6C6           | K04257 |
| ENSG00000188334 | 5.13E-15 | -2.63127 | 1 | 1 BSPH1           | -      |
| ENSG00000188340 | 5.13E-15 | -2.63127 | 1 | 1 OR6N2           | K04257 |
| ENSG00000188373 | 5.13E-15 | -2.63127 | 1 | 1 C10orf99        | -      |
| ENSG00000188379 | 5.13E-15 | -2.63127 | 1 | 1 IFNA2           | K05414 |
| ENSG00000188386 | 5.13E-15 | -2.63127 | 1 | 1 PPP3R2          | K06268 |
| ENSG00000188388 | 5.13E-15 | -2.63127 | 1 | 1 GOLGA6L3        | K10595 |
| ENSG00000188389 | 5.13E-15 | -2.63127 | 1 | 1 PDCD1           | K06744 |
| ENSG00000188393 | 5.13E-15 | -2.63127 | 1 | 1 CLEC2A          | -      |
| ENSG00000188394 | 5.13E-15 | -2.63127 | 1 | 1 GPR21           | K04318 |
| ENSG00000188399 | 5.13E-15 | -2.63127 | 1 | 1 ANKRD36P1       | K17299 |
| ENSG00000188403 | 5.13E-15 | -2.63127 | 1 | 1 IGHV1OR15-9     | -      |
| ENSG00000188404 | 5.13E-15 | -2.63127 | 1 | 1 SELL            | K06495 |
| ENSG00000188408 | 5.13E-15 | -2.63127 | 1 | 1 MAGEB5          | -      |
| ENSG00000188425 | 5.13E-15 | -2.63127 | 1 | 1 NANOS2          | K18760 |
| ENSG00000188438 | 5.13E-15 | -2.63127 | 1 | 1 RP11-1396O13.14 | -      |
| ENSG00000188439 | 5.13E-15 | -2.63127 | 1 | 1 OR4P1P          | K04257 |
| ENSG00000188452 | 5.13E-15 | -2.63127 | 1 | 1 CERKL           | K19602 |
| ENSG00000188459 | 5.13E-15 | -2.63127 | 1 | 1 WASF4P          | K05748 |
| ENSG00000188460 | 5.13E-15 | -2.63127 | 1 | 1 ACTBP11         | K05692 |
| ENSG00000188467 | 5.13E-15 | -2.63127 | 1 | 1 SLC24A5         | K13753 |
| ENSG00000188474 | 5.13E-15 | -2.63127 | 1 | 1 ZNF788          | K09228 |
| ENSG00000188477 | 5.13E-15 | -2.63127 | 1 | 1 AC003003.5      | -      |
| ENSG00000188488 | 5.13E-15 | -2.63127 | 1 | 1 SERPINA5        | K03913 |
| ENSG00000188508 | 5.13E-15 | -2.63127 | 1 | 1 KRTDAP          | -      |
| ENSG00000188512 | 5.13E-15 | -2.63127 | 1 | 1 RP1-273G13.2    | K08738 |
| ENSG00000188523 | 5.13E-15 | -2.63127 | 1 | 1 C9orf171        | -      |
| ENSG00000188525 | 5.13E-15 | -2.63127 | 1 | 1 AC010969.1      | -      |
| ENSG00000188558 | 5.13E-15 | -2.63127 | 1 | 1 OR2G6           | K04257 |
| ENSG00000188580 | 5.13E-15 | -2.63127 | 1 | 1 NKAIN2          | -      |
| ENSG00000188581 | 5.13E-15 | -2.63127 | 1 | 1 KRTAP1-1        | -      |
| ENSG00000188582 | 5.13E-15 | -2.63127 | 1 | 1 PAQR9           | -      |
| ENSG00000188585 | 5.13E-15 | -2.63127 | 1 | 1 LINC00083       | -      |
| ENSG00000188620 | 5.13E-15 | -2.63127 | 1 | 1 HMX3            | K09349 |
| ENSG00000188629 | 5.13E-15 | -2.63127 | 1 | 1 ZNF177          | K09228 |
| ENSG00000188646 | 5.13E-15 | -2.63127 | 1 | 1 RP11-361A23.2   | K10435 |
| ENSG00000188649 | 5.13E-15 | -2.63127 | 1 | 1 CC2D2B          | K19352 |
| ENSG00000188655 | 5.13E-15 | -2.63127 | 1 | 1 RNASE9          | -      |
| ENSG00000188656 | 5.13E-15 | -2.63127 | 1 | 1 TSPY7P          | K11284 |
| ENSG00000188668 | 5.13E-15 | -2.63127 | 1 | 1 OR7E90P         | K04257 |

|                 |          |          |   |                 |        |
|-----------------|----------|----------|---|-----------------|--------|
| ENSG00000188674 | 5.13E-15 | -2.63127 | 1 | 1 C2orf80       | -      |
| ENSG00000188691 | 5.13E-15 | -2.63127 | 1 | 1 RP11-451K18.7 | K04257 |
| ENSG00000188694 | 5.13E-15 | -2.63127 | 1 | 1 KRTAP24-1     | -      |
| ENSG00000188712 | 5.13E-15 | -2.63127 | 1 | 1 OR13D3P       | K04257 |
| ENSG00000188716 | 5.13E-15 | -2.63127 | 1 | 1 DUPD1         | K14165 |
| ENSG00000188722 | 5.13E-15 | -2.63127 | 1 | 1 AL391005.1    | -      |
| ENSG00000188729 | 5.13E-15 | -2.63127 | 1 | 1 OSTN          | -      |
| ENSG00000188730 | 5.13E-15 | -2.63127 | 1 | 1 VWC2          | K11447 |
| ENSG00000188738 | 5.13E-15 | -2.63127 | 1 | 1 FSIP2         | -      |
| ENSG00000188755 | 5.13E-15 | -2.63127 | 1 | 1 TBC1D3P2      | K11837 |
| ENSG00000188765 | 5.13E-15 | -2.63127 | 1 | 1 TMSB4XP2      | K05764 |
| ENSG00000188782 | 5.13E-15 | -2.63127 | 1 | 1 CATSPER4      | K16892 |
| ENSG00000188784 | 5.13E-15 | -2.63127 | 1 | 1 PLA2G2E       | K01047 |
| ENSG00000188800 | 5.13E-15 | -2.63127 | 1 | 1 TMCO2         | -      |
| ENSG00000188803 | 5.13E-15 | -2.63127 | 1 | 1 SHISA6        | -      |
| ENSG00000188816 | 5.13E-15 | -2.63127 | 1 | 1 HMX2          | K09349 |
| ENSG00000188817 | 5.13E-15 | -2.63127 | 1 | 1 SNTN          | K11447 |
| ENSG00000188820 | 5.13E-15 | -2.63127 | 1 | 1 FAM26F        | -      |
| ENSG00000188822 | 5.13E-15 | -2.63127 | 1 | 1 CNR2          | K04278 |
| ENSG00000188828 | 5.13E-15 | -2.63127 | 1 | 1 GLRA4         | K05271 |
| ENSG00000188831 | 5.13E-15 | -2.63127 | 1 | 1 DPPA3P2       | -      |
| ENSG00000188848 | 5.13E-15 | -2.63127 | 1 | 1 BEND4         | -      |
| ENSG00000188868 | 5.13E-15 | -2.63127 | 1 | 1 ZNF563        | K09228 |
| ENSG00000188873 | 5.13E-15 | -2.63127 | 1 | 1 RPL10AP2      | K02865 |
| ENSG00000188877 | 5.13E-15 | -2.63127 | 1 | 1 POTEA         | K17299 |
| ENSG00000188883 | 5.13E-15 | -2.63127 | 1 | 1 KLRG2         | -      |
| ENSG00000188888 | 5.13E-15 | -2.63127 | 1 | 1 GPR179        | -      |
| ENSG00000188906 | 5.13E-15 | -2.63127 | 1 | 1 LRRK2         | K08844 |
| ENSG00000188909 | 5.13E-15 | -2.63127 | 1 | 1 BSX           | K09317 |
| ENSG00000188933 | 5.13E-15 | -2.63127 | 1 | 1 USP32P1       | K11837 |
| ENSG00000188984 | 5.13E-15 | -2.63127 | 1 | 1 AADACL3       | K14351 |
| ENSG00000188991 | 5.13E-15 | -2.63127 | 1 | 1 SLC15A5       | K14639 |
| ENSG00000188993 | 5.13E-15 | -2.63127 | 1 | 1 LRRC66        | -      |
| ENSG00000189002 | 5.13E-15 | -2.63127 | 1 | 1 PROSP         | K03908 |
| ENSG00000189011 | 5.13E-15 | -2.63127 | 1 | 1 AC138783.12   | K10858 |
| ENSG00000189013 | 5.13E-15 | -2.63127 | 1 | 1 KIR2DL4       | K07981 |
| ENSG00000189014 | 5.13E-15 | -2.63127 | 1 | 1 FAM35DP       | K07208 |
| ENSG00000189023 | 5.13E-15 | -2.63127 | 1 | 1 MAGEB16       | -      |
| ENSG00000189030 | 5.13E-15 | -2.63127 | 1 | 1 VHLL          | K03871 |
| ENSG00000189037 | 5.13E-15 | -2.63127 | 1 | 1 DUSP21        | K14165 |
| ENSG00000189045 | 5.13E-15 | -2.63127 | 1 | 1 ANKDD1B       | -      |
| ENSG00000189052 | 5.13E-15 | -2.63127 | 1 | 1 CGB5          | K10045 |
| ENSG00000189056 | 5.13E-15 | -2.63127 | 1 | 1 RELN          | K06249 |
| ENSG00000189064 | 5.13E-15 | -2.63127 | 1 | 1 GAGE2A        | -      |
| ENSG00000189068 | 5.13E-15 | -2.63127 | 1 | 1 VSTM1         | -      |
| ENSG00000189089 | 5.13E-15 | -2.63127 | 1 | 1 RIMKLBP1      | K18310 |
| ENSG00000189090 | 5.13E-15 | -2.63127 | 1 | 1 FAM25B        | -      |
| ENSG00000189108 | 5.13E-15 | -2.63127 | 1 | 1 IL1RAPL2      | K05170 |
| ENSG00000189127 | 5.13E-15 | -2.63127 | 1 | 1 ANKRD34B      | -      |
| ENSG00000189132 | 5.13E-15 | -2.63127 | 1 | 1 FAM47B        | -      |
| ENSG00000189134 | 5.13E-15 | -2.63127 | 1 | 1 NKAPL         | -      |
| ENSG00000189139 | 5.13E-15 | -2.63127 | 1 | 1 FSCB          | -      |
| ENSG00000189145 | 5.13E-15 | -2.63127 | 1 | 1 RP11-77G22.2  | K02912 |
| ENSG00000189152 | 5.13E-15 | -2.63127 | 1 | 1 GRAPL         | K04364 |
| ENSG00000189166 | 5.13E-15 | -2.63127 | 1 | 1 TNRC18P3      | -      |
| ENSG00000189169 | 5.13E-15 | -2.63127 | 1 | 1 KRTAP10-12    | -      |
| ENSG00000189181 | 5.13E-15 | -2.63127 | 1 | 1 OR14I1        | K04257 |
| ENSG00000189182 | 5.13E-15 | -2.63127 | 1 | 1 KRT77         | K07605 |

|                 |          |          |   |                  |        |
|-----------------|----------|----------|---|------------------|--------|
| ENSG00000189184 | 5.13E-15 | -2.63127 | 1 | 1 PCDH18         | K16499 |
| ENSG00000189186 | 5.13E-15 | -2.63127 | 1 | 1 DCAF8L2        | K11804 |
| ENSG00000189195 | 5.13E-15 | -2.63127 | 1 | 1 BTBD8          | K10480 |
| ENSG00000189196 | 5.13E-15 | -2.63127 | 1 | 1 LINC00994      | -      |
| ENSG00000189238 | 5.13E-15 | -2.63127 | 1 | 1 LINC00943      | -      |
| ENSG00000189252 | 5.13E-15 | -2.63127 | 1 | 1 SPANXN3        | -      |
| ENSG00000189253 | 5.13E-15 | -2.63127 | 1 | 1 TRIM64B        | K12019 |
| ENSG00000189283 | 5.13E-15 | -2.63127 | 1 | 1 FHIT           | K01522 |
| ENSG00000189295 | 5.13E-15 | -2.63127 | 1 | 1 ANKRD62P1-PARP | -      |
| ENSG00000189299 | 5.13E-15 | -2.63127 | 1 | 1 FOXR2          | -      |
| ENSG00000189316 | 5.13E-15 | -2.63127 | 1 | 1 RP11-797H7.5   | -      |
| ENSG00000189325 | 5.13E-15 | -2.63127 | 1 | 1 C6orf222       | -      |
| ENSG00000189326 | 5.13E-15 | -2.63127 | 1 | 1 SPANXN4        | -      |
| ENSG00000189332 | 5.13E-15 | -2.63127 | 1 | 1 RP11-113D6.10  | -      |
| ENSG00000189348 | 5.13E-15 | -2.63127 | 1 | 1 FAM90A27P      | -      |
| ENSG00000189357 | 5.13E-15 | -2.63127 | 1 | 1 SPATA31D4      | -      |
| ENSG00000189367 | 5.13E-15 | -2.63127 | 1 | 1 KIAA0408       | -      |
| ENSG00000189369 | 5.13E-15 | -2.63127 | 1 | 1 GSPT2          | K03267 |
| ENSG00000189372 | 5.13E-15 | -2.63127 | 1 | 1 RP6-149D17.1   | K14075 |
| ENSG00000189393 | 5.13E-15 | -2.63127 | 1 | 1 FAM90A14P      | -      |
| ENSG00000189398 | 5.13E-15 | -2.63127 | 1 | 1 OR7E12P        | K04257 |
| ENSG00000189401 | 5.13E-15 | -2.63127 | 1 | 1 OTUD6A         | K18342 |
| ENSG00000189419 | 5.13E-15 | -2.63127 | 1 | 1 SPATA41        | -      |
| ENSG00000189420 | 5.13E-15 | -2.63127 | 1 | 1 ZFP92          | K09228 |
| ENSG00000189430 | 5.13E-15 | -2.63127 | 1 | 1 NCR1           | K06741 |
| ENSG00000194270 | 5.13E-15 | -2.63127 | 1 | 1 Y_RNA          | -      |
| ENSG00000194297 | 5.13E-15 | -2.63127 | 1 | 1 RNU1-75P       | -      |
| ENSG00000194717 | 5.13E-15 | -2.63127 | 1 | 1 MIR494         | -      |
| ENSG00000195024 | 5.13E-15 | -2.63127 | 1 | 1 RNU1-15P       | -      |
| ENSG00000195401 | 5.13E-15 | -2.63127 | 1 | 1 Y_RNA          | -      |
| ENSG00000196071 | 5.13E-15 | -2.63127 | 1 | 1 OR2L13         | K04257 |
| ENSG00000196081 | 5.13E-15 | -2.63127 | 1 | 1 ZNF724P        | K09228 |
| ENSG00000196082 | 5.13E-15 | -2.63127 | 1 | 1 AC140061.1     | K04257 |
| ENSG00000196085 | 5.13E-15 | -2.63127 | 1 | 1 AC013442.1     | -      |
| ENSG00000196090 | 5.13E-15 | -2.63127 | 1 | 1 PTPRT          | K13297 |
| ENSG00000196091 | 5.13E-15 | -2.63127 | 1 | 1 MYBPC1         | K12557 |
| ENSG00000196092 | 5.13E-15 | -2.63127 | 1 | 1 PAX5           | K09383 |
| ENSG00000196095 | 5.13E-15 | -2.63127 | 1 | 1 AC126182.1     | -      |
| ENSG00000196096 | 5.13E-15 | -2.63127 | 1 | 1 AC079610.2     | -      |
| ENSG00000196098 | 5.13E-15 | -2.63127 | 1 | 1 OR5K4          | K04257 |
| ENSG00000196099 | 5.13E-15 | -2.63127 | 1 | 1 OR6M1          | K04257 |
| ENSG00000196104 | 5.13E-15 | -2.63127 | 1 | 1 SPOCK3         | K08136 |
| ENSG00000196109 | 5.13E-15 | -2.63127 | 1 | 1 ZNF676         | K09228 |
| ENSG00000196114 | 5.13E-15 | -2.63127 | 1 | 1 RP3-391O22.3   | K06566 |
| ENSG00000196115 | 5.13E-15 | -2.63127 | 1 | 1 ADAM5          | -      |
| ENSG00000196119 | 5.13E-15 | -2.63127 | 1 | 1 OR8A1          | K04257 |
| ENSG00000196126 | 5.13E-15 | -2.63127 | 1 | 1 HLA-DRB1       | K06752 |
| ENSG00000196131 | 5.13E-15 | -2.63127 | 1 | 1 VN1R2          | K04614 |
| ENSG00000196136 | 5.13E-15 | -2.63127 | 1 | 1 SERPINA3       | K04525 |
| ENSG00000196138 | 5.13E-15 | -2.63127 | 1 | 1 AC005831.1     | -      |
| ENSG00000196139 | 5.13E-15 | -2.63127 | 1 | 1 AKR1C3         | K04119 |
| ENSG00000196143 | 5.13E-15 | -2.63127 | 1 | 1 OR11H13P       | K04257 |
| ENSG00000196156 | 5.13E-15 | -2.63127 | 1 | 1 KRTAP4-3       | -      |
| ENSG00000196166 | 5.13E-15 | -2.63127 | 1 | 1 C8orf86        | K17985 |
| ENSG00000196167 | 5.13E-15 | -2.63127 | 1 | 1 COLCA1         | -      |
| ENSG00000196169 | 5.13E-15 | -2.63127 | 1 | 1 KIF19          | K10401 |
| ENSG00000196171 | 5.13E-15 | -2.63127 | 1 | 1 OR6K2          | K04257 |
| ENSG00000196172 | 5.13E-15 | -2.63127 | 1 | 1 ZNF681         | K09228 |

|                 |          |          |   |                 |        |
|-----------------|----------|----------|---|-----------------|--------|
| ENSG00000196184 | 5.13E-15 | -2.63127 | 1 | 1 OR10J1        | K04257 |
| ENSG00000196188 | 5.13E-15 | -2.63127 | 1 | 1 CTSE          | K01382 |
| ENSG00000196209 | 5.13E-15 | -2.63127 | 1 | 1 SIRPB2        | K16826 |
| ENSG00000196224 | 5.13E-15 | -2.63127 | 1 | 1 KRTAP5-3      | -      |
| ENSG00000196226 | 5.13E-15 | -2.63127 | 1 | 1 HIST1H2BB     | K11252 |
| ENSG00000196228 | 5.13E-15 | -2.63127 | 1 | 1 SULT1C3       | K01025 |
| ENSG00000196230 | 5.13E-15 | -2.63127 | 1 | 1 TUBB          | K07375 |
| ENSG00000196240 | 5.13E-15 | -2.63127 | 1 | 1 OR2T2         | K04257 |
| ENSG00000196242 | 5.13E-15 | -2.63127 | 1 | 1 OR2C3         | K04257 |
| ENSG00000196243 | 5.13E-15 | -2.63127 | 1 | 1 LINC00615     | -      |
| ENSG00000196248 | 5.13E-15 | -2.63127 | 1 | 1 OR10S1        | K04257 |
| ENSG00000196260 | 5.13E-15 | -2.63127 | 1 | 1 SFTA2         | -      |
| ENSG00000196263 | 5.13E-15 | -2.63127 | 1 | 1 ZNF471        | K09228 |
| ENSG00000196273 | 5.13E-15 | -2.63127 | 1 | 1 LINC00523     | -      |
| ENSG00000196274 | 5.13E-15 | -2.63127 | 1 | 1 AC090519.1    | K04613 |
| ENSG00000196277 | 5.13E-15 | -2.63127 | 1 | 1 GRM7          | K04608 |
| ENSG00000196301 | 5.13E-15 | -2.63127 | 1 | 1 HLA-DRB9      | K06752 |
| ENSG00000196326 | 5.13E-15 | -2.63127 | 1 | 1 AKR1CL1       | K04119 |
| ENSG00000196329 | 5.13E-15 | -2.63127 | 1 | 1 GIMAP5        | K08504 |
| ENSG00000196341 | 5.13E-15 | -2.63127 | 1 | 1 OR8D1         | K04257 |
| ENSG00000196344 | 5.13E-15 | -2.63127 | 1 | 1 ADH7          | K13951 |
| ENSG00000196345 | 5.13E-15 | -2.63127 | 1 | 1 ZKSCAN7       | K09229 |
| ENSG00000196350 | 5.13E-15 | -2.63127 | 1 | 1 ZNF729        | K09228 |
| ENSG00000196353 | 5.13E-15 | -2.63127 | 1 | 1 CPNE4         | -      |
| ENSG00000196355 | 5.13E-15 | -2.63127 | 1 | 1 AC021860.1    | K14404 |
| ENSG00000196364 | 5.13E-15 | -2.63127 | 1 | 1 PRSS29P       | -      |
| ENSG00000196368 | 5.13E-15 | -2.63127 | 1 | 1 NUDT11        | K07766 |
| ENSG00000196376 | 5.13E-15 | -2.63127 | 1 | 1 SLC35F1       | K15287 |
| ENSG00000196381 | 5.13E-15 | -2.63127 | 1 | 1 ZNF781        | K09228 |
| ENSG00000196383 | 5.13E-15 | -2.63127 | 1 | 1 OR4Q2         | K04257 |
| ENSG00000196390 | 5.13E-15 | -2.63127 | 1 | 1 CTD-2503O16.3 | K09228 |
| ENSG00000196395 | 5.13E-15 | -2.63127 | 1 | 1 RP13-77O11.11 | -      |
| ENSG00000196400 | 5.13E-15 | -2.63127 | 1 | 1 BX255923.1    | K13194 |
| ENSG00000196403 | 5.13E-15 | -2.63127 | 1 | 1 OR10D1P       | K04257 |
| ENSG00000196406 | 5.13E-15 | -2.63127 | 1 | 1 SPANXD        | -      |
| ENSG00000196431 | 5.13E-15 | -2.63127 | 1 | 1 CRYBA4        | -      |
| ENSG00000196433 | 5.13E-15 | -2.63127 | 1 | 1 ASMT          | K00543 |
| ENSG00000196440 | 5.13E-15 | -2.63127 | 1 | 1 ARMCX4        | K03767 |
| ENSG00000196460 | 5.13E-15 | -2.63127 | 1 | 1 RFX8          | -      |
| ENSG00000196468 | 5.13E-15 | -2.63127 | 1 | 1 FGF16         | K04358 |
| ENSG00000196472 | 5.13E-15 | -2.63127 | 1 | 1 RP13-644M16.4 | K00699 |
| ENSG00000196475 | 5.13E-15 | -2.63127 | 1 | 1 GK2           | K00864 |
| ENSG00000196476 | 5.13E-15 | -2.63127 | 1 | 1 C20orf96      | -      |
| ENSG00000196482 | 5.13E-15 | -2.63127 | 1 | 1 ESRRG         | K08554 |
| ENSG00000196533 | 5.13E-15 | -2.63127 | 1 | 1 C1orf186      | K02872 |
| ENSG00000196534 | 5.13E-15 | -2.63127 | 1 | 1 OR9K1P        | K04257 |
| ENSG00000196539 | 5.13E-15 | -2.63127 | 1 | 1 OR2T3         | K04257 |
| ENSG00000196542 | 5.13E-15 | -2.63127 | 1 | 1 SPTSSB        | -      |
| ENSG00000196553 | 5.13E-15 | -2.63127 | 1 | 1 LINC00238     | -      |
| ENSG00000196564 | 5.13E-15 | -2.63127 | 1 | 1 RP3-499B10.3  | K12581 |
| ENSG00000196565 | 5.13E-15 | -2.63127 | 1 | 1 HBG2          | K13824 |
| ENSG00000196578 | 5.13E-15 | -2.63127 | 1 | 1 OR5AC2        | K04257 |
| ENSG00000196581 | 5.13E-15 | -2.63127 | 1 | 1 AJAP1         | -      |
| ENSG00000196589 | 5.13E-15 | -2.63127 | 1 | 1 CTB-25J19.1   | -      |
| ENSG00000196600 | 5.13E-15 | -2.63127 | 1 | 1 SLC22A25      | K08206 |
| ENSG00000196616 | 5.13E-15 | -2.63127 | 1 | 1 ADH1B         | K13951 |
| ENSG00000196620 | 5.13E-15 | -2.63127 | 1 | 1 UGT2B15       | K00699 |
| ENSG00000196628 | 5.13E-15 | -2.63127 | 1 | 1 TCF4          | K15603 |

|                 |          |          |   |                 |        |
|-----------------|----------|----------|---|-----------------|--------|
| ENSG00000196632 | 5.13E-15 | -2.63127 | 1 | 1 WNK3          | K08867 |
| ENSG00000196653 | 5.13E-15 | -2.63127 | 1 | 1 ZNF502        | K09228 |
| ENSG00000196655 | 5.13E-15 | -2.63127 | 1 | 1 TRAPPC4       | K08171 |
| ENSG00000196660 | 5.13E-15 | -2.63127 | 1 | 1 SLC30A10      | K14697 |
| ENSG00000196661 | 5.13E-15 | -2.63127 | 1 | 1 OR8B3         | K04257 |
| ENSG00000196664 | 5.13E-15 | -2.63127 | 1 | 1 TLR7          | -      |
| ENSG00000196711 | 5.13E-15 | -2.63127 | 1 | 1 FAM150A       | -      |
| ENSG00000196724 | 5.13E-15 | -2.63127 | 1 | 1 ZNF418        | K09228 |
| ENSG00000196734 | 5.13E-15 | -2.63127 | 1 | 1 LCE1B         | -      |
| ENSG00000196735 | 5.13E-15 | -2.63127 | 1 | 1 HLA-DQA1      | K06752 |
| ENSG00000196737 | 5.13E-15 | -2.63127 | 1 | 1 AC087392.1    | K12581 |
| ENSG00000196748 | 5.13E-15 | -2.63127 | 1 | 1 CLPSL2        | -      |
| ENSG00000196758 | 5.13E-15 | -2.63127 | 1 | 1 AC079612.1    | -      |
| ENSG00000196767 | 5.13E-15 | -2.63127 | 1 | 1 POU3F4        | K09365 |
| ENSG00000196772 | 5.13E-15 | -2.63127 | 1 | 1 OR14A16       | K04257 |
| ENSG00000196774 | 5.13E-15 | -2.63127 | 1 | 1 ANKRD20A1     | K17299 |
| ENSG00000196777 | 5.13E-15 | -2.63127 | 1 | 1 AL162574.1    | -      |
| ENSG00000196778 | 5.13E-15 | -2.63127 | 1 | 1 OR52K1        | K04257 |
| ENSG00000196796 | 5.13E-15 | -2.63127 | 1 | 1 CTB-134H23.2  | -      |
| ENSG00000196800 | 5.13E-15 | -2.63127 | 1 | 1 SPINK14       | -      |
| ENSG00000196805 | 5.13E-15 | -2.63127 | 1 | 1 SPRR2B        | -      |
| ENSG00000196826 | 5.13E-15 | -2.63127 | 1 | 1 ZNF709        | K09228 |
| ENSG00000196832 | 5.13E-15 | -2.63127 | 1 | 1 OR11G2        | K04257 |
| ENSG00000196834 | 5.13E-15 | -2.63127 | 1 | 1 POTEI         | K17299 |
| ENSG00000196844 | 5.13E-15 | -2.63127 | 1 | 1 PATE2         | -      |
| ENSG00000196859 | 5.13E-15 | -2.63127 | 1 | 1 KRT39         | K07604 |
| ENSG00000196861 | 5.13E-15 | -2.63127 | 1 | 1 AC002994.1    | K03626 |
| ENSG00000196893 | 5.13E-15 | -2.63127 | 1 | 1 AC090286.4    | -      |
| ENSG00000196932 | 5.13E-15 | -2.63127 | 1 | 1 TMEM26        | -      |
| ENSG00000196933 | 5.13E-15 | -2.63127 | 1 | 1 RPS26P11      | K02976 |
| ENSG00000196936 | 5.13E-15 | -2.63127 | 1 | 1 OR2L8         | K04257 |
| ENSG00000196944 | 5.13E-15 | -2.63127 | 1 | 1 OR2T4         | K04257 |
| ENSG00000196946 | 5.13E-15 | -2.63127 | 1 | 1 ZNF705A       | K09228 |
| ENSG00000196951 | 5.13E-15 | -2.63127 | 1 | 1 RP11-425I13.3 | -      |
| ENSG00000196967 | 5.13E-15 | -2.63127 | 1 | 1 ZNF585A       | K09228 |
| ENSG00000196970 | 5.13E-15 | -2.63127 | 1 | 1 NXF4          | K14284 |
| ENSG00000196972 | 5.13E-15 | -2.63127 | 1 | 1 LINC00087     | -      |
| ENSG00000196979 | 5.13E-15 | -2.63127 | 1 | 1 AL360004.1    | K04613 |
| ENSG00000196987 | 5.13E-15 | -2.63127 | 1 | 1 LCA10         | K03539 |
| ENSG00000196990 | 5.13E-15 | -2.63127 | 1 | 1 FAM163B       | -      |
| ENSG00000197013 | 5.13E-15 | -2.63127 | 1 | 1 ZNF429        | K09228 |
| ENSG00000197015 | 5.13E-15 | -2.63127 | 1 | 1 AL353898.1    | K12581 |
| ENSG00000197016 | 5.13E-15 | -2.63127 | 1 | 1 ZNF470        | K09228 |
| ENSG00000197020 | 5.13E-15 | -2.63127 | 1 | 1 ZNF100        | K09228 |
| ENSG00000197023 | 5.13E-15 | -2.63127 | 1 | 1 OR51A6P       | K04257 |
| ENSG00000197038 | 5.13E-15 | -2.63127 | 1 | 1 RBMY1A3P      | K12885 |
| ENSG00000197046 | 5.13E-15 | -2.63127 | 1 | 1 SIGLEC15      | K16352 |
| ENSG00000197057 | 5.13E-15 | -2.63127 | 1 | 1 DTHD1         | -      |
| ENSG00000197067 | 5.13E-15 | -2.63127 | 1 | 1 OR2T32P       | K04257 |
| ENSG00000197071 | 5.13E-15 | -2.63127 | 1 | 1 AC010243.1    | -      |
| ENSG00000197079 | 5.13E-15 | -2.63127 | 1 | 1 KRT35         | K07604 |
| ENSG00000197083 | 5.13E-15 | -2.63127 | 1 | 1 ZNF300P1      | K09228 |
| ENSG00000197084 | 5.13E-15 | -2.63127 | 1 | 1 LCE1C         | -      |
| ENSG00000197085 | 5.13E-15 | -2.63127 | 1 | 1 NPSR1-AS1     | -      |
| ENSG00000197092 | 5.13E-15 | -2.63127 | 1 | 1 GOLGA6L16P    | K10595 |
| ENSG00000197099 | 5.13E-15 | -2.63127 | 1 | 1 RP11-573D15.8 | -      |
| ENSG00000197106 | 5.13E-15 | -2.63127 | 1 | 1 SLC6A17       | K05048 |
| ENSG00000197110 | 5.13E-15 | -2.63127 | 1 | 1 IFNL3         | K05447 |



|                 |          |          |   |                 |        |
|-----------------|----------|----------|---|-----------------|--------|
| ENSG00000197123 | 5.13E-15 | -2.63127 | 1 | 1 ZNF679        | K09228 |
| ENSG00000197124 | 5.13E-15 | -2.63127 | 1 | 1 ZNF682        | K09228 |
| ENSG00000197125 | 5.13E-15 | -2.63127 | 1 | 1 OR8B8         | K04257 |
| ENSG00000197134 | 5.13E-15 | -2.63127 | 1 | 1 ZNF257        | K10087 |
| ENSG00000197161 | 5.13E-15 | -2.63127 | 1 | 1 OR4C4P        | K04257 |
| ENSG00000197171 | 5.13E-15 | -2.63127 | 1 | 1 OR2B4P        | K04257 |
| ENSG00000197176 | 5.13E-15 | -2.63127 | 1 | 1 RP11-76E12.1  | -      |
| ENSG00000197177 | 5.13E-15 | -2.63127 | 1 | 1 GPR123        | K08460 |
| ENSG00000197185 | 5.13E-15 | -2.63127 | 1 | 1 SSXP1         | K15624 |
| ENSG00000197213 | 5.13E-15 | -2.63127 | 1 | 1 ZSCAN5B       | K09230 |
| ENSG00000197214 | 5.13E-15 | -2.63127 | 1 | 1 TCEA1P1       | K03145 |
| ENSG00000197233 | 5.13E-15 | -2.63127 | 1 | 1 OR1J2         | K04257 |
| ENSG00000197241 | 5.13E-15 | -2.63127 | 1 | 1 SLC2A7        | K12201 |
| ENSG00000197251 | 5.13E-15 | -2.63127 | 1 | 1 LINC00336     | -      |
| ENSG00000197253 | 5.13E-15 | -2.63127 | 1 | 1 TPSB2         | K01340 |
| ENSG00000197254 | 5.13E-15 | -2.63127 | 1 | 1 AP000445.1    | K00628 |
| ENSG00000197261 | 5.13E-15 | -2.63127 | 1 | 1 C6orf141      | K11447 |
| ENSG00000197262 | 5.13E-15 | -2.63127 | 1 | 1 CCL4L2        | K12964 |
| ENSG00000197263 | 5.13E-15 | -2.63127 | 1 | 1 OR8D2         | K04257 |
| ENSG00000197272 | 5.13E-15 | -2.63127 | 1 | 1 IL27          | -      |
| ENSG00000197273 | 5.13E-15 | -2.63127 | 1 | 1 GUCA2A        | -      |
| ENSG00000197291 | 5.13E-15 | -2.63127 | 1 | 1 RAMP2-AS1     | -      |
| ENSG00000197301 | 5.13E-15 | -2.63127 | 1 | 1 RP11-366L20.2 | K01557 |
| ENSG00000197308 | 5.13E-15 | -2.63127 | 1 | 1 GATA3-AS1     | -      |
| ENSG00000197309 | 5.13E-15 | -2.63127 | 1 | 1 OR10D3        | K04257 |
| ENSG00000197320 | 5.13E-15 | -2.63127 | 1 | 1 AC060834.2    | -      |
| ENSG00000197322 | 5.13E-15 | -2.63127 | 1 | 1 C17orf102     | -      |
| ENSG00000197334 | 5.13E-15 | -2.63127 | 1 | 1 AC032027.1    | K08857 |
| ENSG00000197353 | 5.13E-15 | -2.63127 | 1 | 1 LYPD2         | -      |
| ENSG00000197364 | 5.13E-15 | -2.63127 | 1 | 1 S100A7L2      | -      |
| ENSG00000197403 | 5.13E-15 | -2.63127 | 1 | 1 OR6N1         | K04257 |
| ENSG00000197408 | 5.13E-15 | -2.63127 | 1 | 1 CYP2B6        | K17709 |
| ENSG00000197410 | 5.13E-15 | -2.63127 | 1 | 1 DCHS2         | K16507 |
| ENSG00000197414 | 5.13E-15 | -2.63127 | 1 | 1 GOLGA6L1      | K09488 |
| ENSG00000197421 | 5.13E-15 | -2.63127 | 1 | 1 GGT3P         | K18592 |
| ENSG00000197428 | 5.13E-15 | -2.63127 | 1 | 1 OR51D1        | K04257 |
| ENSG00000197430 | 5.13E-15 | -2.63127 | 1 | 1 OPALIN        | -      |
| ENSG00000197437 | 5.13E-15 | -2.63127 | 1 | 1 OR13G1        | K04257 |
| ENSG00000197454 | 5.13E-15 | -2.63127 | 1 | 1 OR2L5         | K04257 |
| ENSG00000197462 | 5.13E-15 | -2.63127 | 1 | 1 AC005276.1    | -      |
| ENSG00000197465 | 5.13E-15 | -2.63127 | 1 | 1 GYPE          | K06575 |
| ENSG00000197468 | 5.13E-15 | -2.63127 | 1 | 1 RP11-747H12.1 | K04257 |
| ENSG00000197471 | 5.13E-15 | -2.63127 | 1 | 1 SPN           | K06477 |
| ENSG00000197472 | 5.13E-15 | -2.63127 | 1 | 1 ZNF695        | K09228 |
| ENSG00000197475 | 5.13E-15 | -2.63127 | 1 | 1 ADAM3A        | -      |
| ENSG00000197476 | 5.13E-15 | -2.63127 | 1 | 1 RP11-170L3.7  | K06856 |
| ENSG00000197479 | 5.13E-15 | -2.63127 | 1 | 1 PCDHB11       | K16494 |
| ENSG00000197487 | 5.13E-15 | -2.63127 | 1 | 1 GALP          | -      |
| ENSG00000197496 | 5.13E-15 | -2.63127 | 1 | 1 SLC2A10       | K08147 |
| ENSG00000197502 | 5.13E-15 | -2.63127 | 1 | 1 AL627171.1    | -      |
| ENSG00000197503 | 5.13E-15 | -2.63127 | 1 | 1 LINC00477     | -      |
| ENSG00000197520 | 5.13E-15 | -2.63127 | 1 | 1 FAM177B       | -      |
| ENSG00000197532 | 5.13E-15 | -2.63127 | 1 | 1 OR6Y1         | K04257 |
| ENSG00000197549 | 5.13E-15 | -2.63127 | 1 | 1 PRAMENP       | -      |
| ENSG00000197550 | 5.13E-15 | -2.63127 | 1 | 1 RP11-460N11.2 | K09228 |
| ENSG00000197575 | 5.13E-15 | -2.63127 | 1 | 1 RPS17P2       | K02962 |
| ENSG00000197585 | 5.13E-15 | -2.63127 | 1 | 1 AC107218.3    | -      |
| ENSG00000197588 | 5.13E-15 | -2.63127 | 1 | 1 KLKPI         | -      |

|                 |          |          |   |              |        |
|-----------------|----------|----------|---|--------------|--------|
| ENSG00000197591 | 5.13E-15 | -2.63127 | 1 | 1 OR11L1     | K04257 |
| ENSG00000197594 | 5.13E-15 | -2.63127 | 1 | 1 ENPP1      | K01513 |
| ENSG00000197595 | 5.13E-15 | -2.63127 | 1 | 1 C13orf35   | -      |
| ENSG00000197616 | 5.13E-15 | -2.63127 | 1 | 1 MYH6       | K17751 |
| ENSG00000197617 | 5.13E-15 | -2.63127 | 1 | 1 VN1R5      | K04614 |
| ENSG00000197619 | 5.13E-15 | -2.63127 | 1 | 1 ZNF615     | K09228 |
| ENSG00000197627 | 5.13E-15 | -2.63127 | 1 | 1 UBE2Q2P12  | K10582 |
| ENSG00000197641 | 5.13E-15 | -2.63127 | 1 | 1 SERPINB13  | K13963 |
| ENSG00000197644 | 5.13E-15 | -2.63127 | 1 | 1 AC106870.2 | -      |
| ENSG00000197647 | 5.13E-15 | -2.63127 | 1 | 1 ZNF433     | K09228 |
| ENSG00000197651 | 5.13E-15 | -2.63127 | 1 | 1 CCER1      | -      |
| ENSG00000197658 | 5.13E-15 | -2.63127 | 1 | 1 SLC22A24   | K08206 |
| ENSG00000197665 | 5.13E-15 | -2.63127 | 1 | 1 AC007952.6 | -      |
| ENSG00000197674 | 5.13E-15 | -2.63127 | 1 | 1 OR51C1P    | K04257 |
| ENSG00000197683 | 5.13E-15 | -2.63127 | 1 | 1 KRTAP26-1  | -      |
| ENSG00000197692 | 5.13E-15 | -2.63127 | 1 | 1 CBX3P7     | K11586 |
| ENSG00000197704 | 5.13E-15 | -2.63127 | 1 | 1 FRMPD2P1   | -      |
| ENSG00000197705 | 5.13E-15 | -2.63127 | 1 | 1 KLHL14     | K10451 |
| ENSG00000197706 | 5.13E-15 | -2.63127 | 1 | 1 OR6C74     | K04257 |
| ENSG00000197721 | 5.13E-15 | -2.63127 | 1 | 1 CR1L       | K04011 |
| ENSG00000197723 | 5.13E-15 | -2.63127 | 1 | 1 HSPB9      | K09547 |
| ENSG00000197734 | 5.13E-15 | -2.63127 | 1 | 1 C14orf178  | K09228 |
| ENSG00000197745 | 5.13E-15 | -2.63127 | 1 | 1 SCGB1D4    | -      |
| ENSG00000197775 | 5.13E-15 | -2.63127 | 1 | 1 DHRS4-AS1  | -      |
| ENSG00000197776 | 5.13E-15 | -2.63127 | 1 | 1 KLHDC1     | -      |
| ENSG00000197779 | 5.13E-15 | -2.63127 | 1 | 1 ZNF81      | K09228 |
| ENSG00000197786 | 5.13E-15 | -2.63127 | 1 | 1 OR5B17     | K04257 |
| ENSG00000197790 | 5.13E-15 | -2.63127 | 1 | 1 OR52M1     | K04257 |
| ENSG00000197794 | 5.13E-15 | -2.63127 | 1 | 1 IGKV7-3    | -      |
| ENSG00000197805 | 5.13E-15 | -2.63127 | 1 | 1 BX649597.1 | K06053 |
| ENSG00000197822 | 5.13E-15 | -2.63127 | 1 | 1 OCLN       | K06088 |
| ENSG00000197825 | 5.13E-15 | -2.63127 | 1 | 1 AC061975.1 | K01368 |
| ENSG00000197826 | 5.13E-15 | -2.63127 | 1 | 1 C4orf22    | -      |
| ENSG00000197838 | 5.13E-15 | -2.63127 | 1 | 1 CYP2A13    | K17685 |
| ENSG00000197844 | 5.13E-15 | -2.63127 | 1 | 1 AL358813.1 | -      |
| ENSG00000197849 | 5.13E-15 | -2.63127 | 1 | 1 OR8G1      | K04257 |
| ENSG00000197851 | 5.13E-15 | -2.63127 | 1 | 1 C7orf76    | -      |
| ENSG00000197863 | 5.13E-15 | -2.63127 | 1 | 1 ZNF790     | K09228 |
| ENSG00000197866 | 5.13E-15 | -2.63127 | 1 | 1 OR5M12P    | K04257 |
| ENSG00000197870 | 5.13E-15 | -2.63127 | 1 | 1 PRB3       | K13911 |
| ENSG00000197872 | 5.13E-15 | -2.63127 | 1 | 1 FAM49A     | -      |
| ENSG00000197887 | 5.13E-15 | -2.63127 | 1 | 1 OR1S2      | K04257 |
| ENSG00000197889 | 5.13E-15 | -2.63127 | 1 | 1 MEIG1      | -      |
| ENSG00000197891 | 5.13E-15 | -2.63127 | 1 | 1 SLC22A12   | K08208 |
| ENSG00000197893 | 5.13E-15 | -2.63127 | 1 | 1 NRAP       | -      |
| ENSG00000197901 | 5.13E-15 | -2.63127 | 1 | 1 SLC22A6    | K08203 |
| ENSG00000197910 | 5.13E-15 | -2.63127 | 1 | 1 FAM25G     | -      |
| ENSG00000197919 | 5.13E-15 | -2.63127 | 1 | 1 IFNA1      | K05414 |
| ENSG00000197921 | 5.13E-15 | -2.63127 | 1 | 1 HES5       | K06055 |
| ENSG00000197928 | 5.13E-15 | -2.63127 | 1 | 1 ZNF677     | K09228 |
| ENSG00000197932 | 5.13E-15 | -2.63127 | 1 | 1 F8A1       | -      |
| ENSG00000197934 | 5.13E-15 | -2.63127 | 1 | 1 AP001597.1 | -      |
| ENSG00000197935 | 5.13E-15 | -2.63127 | 1 | 1 ZNF311     | K09228 |
| ENSG00000197937 | 5.13E-15 | -2.63127 | 1 | 1 ZNF347     | K12581 |
| ENSG00000197938 | 5.13E-15 | -2.63127 | 1 | 1 OR5H2      | K04257 |
| ENSG00000197953 | 5.13E-15 | -2.63127 | 1 | 1 AADACL2    | K14350 |
| ENSG00000197984 | 5.13E-15 | -2.63127 | 1 | 1 OR51A8P    | K04257 |
| ENSG00000197990 | 5.13E-15 | -2.63127 | 1 | 1 ZNF734P    | K09228 |

|                 |          |          |   |                  |        |
|-----------------|----------|----------|---|------------------|--------|
| ENSG00000197991 | 5.13E-15 | -2.63127 | 1 | 1 PCDH20         | K16498 |
| ENSG00000197992 | 5.13E-15 | -2.63127 | 1 | 1 CLEC9A         | K17515 |
| ENSG00000197993 | 5.13E-15 | -2.63127 | 1 | 1 KEL            | K06577 |
| ENSG00000198010 | 5.13E-15 | -2.63127 | 1 | 1 DLGAP2         | -      |
| ENSG00000198019 | 5.13E-15 | -2.63127 | 1 | 1 FCGR1B         | K06498 |
| ENSG00000198021 | 5.13E-15 | -2.63127 | 1 | 1 SPANXA1        | -      |
| ENSG00000198022 | 5.13E-15 | -2.63127 | 1 | 1 RP11-432N13.4  | -      |
| ENSG00000198028 | 5.13E-15 | -2.63127 | 1 | 1 ZNF560         | K09228 |
| ENSG00000198033 | 5.13E-15 | -2.63127 | 1 | 1 TUBA3C         | K07374 |
| ENSG00000198046 | 5.13E-15 | -2.63127 | 1 | 1 ZNF667         | K09228 |
| ENSG00000198049 | 5.13E-15 | -2.63127 | 1 | 1 AVPR1B         | K04227 |
| ENSG00000198054 | 5.13E-15 | -2.63127 | 1 | 1 DSCR8          | -      |
| ENSG00000198062 | 5.13E-15 | -2.63127 | 1 | 1 POTEH          | K17299 |
| ENSG00000198064 | 5.13E-15 | -2.63127 | 1 | 1 RP11-347C12.1  | K01896 |
| ENSG00000198075 | 5.13E-15 | -2.63127 | 1 | 1 SULT1C4        | K01025 |
| ENSG00000198077 | 5.13E-15 | -2.63127 | 1 | 1 CYP2A7         | K17684 |
| ENSG00000198082 | 5.13E-15 | -2.63127 | 1 | 1 H2AFB1         | K11251 |
| ENSG00000198083 | 5.13E-15 | -2.63127 | 1 | 1 KRTAP9-9       | -      |
| ENSG00000198090 | 5.13E-15 | -2.63127 | 1 | 1 KRTAP4-6       | -      |
| ENSG00000198092 | 5.13E-15 | -2.63127 | 1 | 1 TMPRSS11F      | K09752 |
| ENSG00000198093 | 5.13E-15 | -2.63127 | 1 | 1 ZNF649         | K09228 |
| ENSG00000198099 | 5.13E-15 | -2.63127 | 1 | 1 ADH4           | K13980 |
| ENSG00000198100 | 5.13E-15 | -2.63127 | 1 | 1 AL138751.1     | K12581 |
| ENSG00000198104 | 5.13E-15 | -2.63127 | 1 | 1 OR2T6          | K04257 |
| ENSG00000198108 | 5.13E-15 | -2.63127 | 1 | 1 CHSY3          | K13499 |
| ENSG00000198128 | 5.13E-15 | -2.63127 | 1 | 1 OR2L3          | K04257 |
| ENSG00000198129 | 5.13E-15 | -2.63127 | 1 | 1 DEFB107B       | -      |
| ENSG00000198133 | 5.13E-15 | -2.63127 | 1 | 1 TMEM229B       | -      |
| ENSG00000198153 | 5.13E-15 | -2.63127 | 1 | 1 ZNF849P        | K09228 |
| ENSG00000198155 | 5.13E-15 | -2.63127 | 1 | 1 ZNF876P        | K09228 |
| ENSG00000198161 | 5.13E-15 | -2.63127 | 1 | 1 PPIAL4C        | K12738 |
| ENSG00000198173 | 5.13E-15 | -2.63127 | 1 | 1 FAM47C         | -      |
| ENSG00000198178 | 5.13E-15 | -2.63127 | 1 | 1 CLEC4C         | K06723 |
| ENSG00000198183 | 5.13E-15 | -2.63127 | 1 | 1 BPIFA1         | -      |
| ENSG00000198185 | 5.13E-15 | -2.63127 | 1 | 1 ZNF334         | K09228 |
| ENSG00000198203 | 5.13E-15 | -2.63127 | 1 | 1 SULT1C2        | K01025 |
| ENSG00000198216 | 5.13E-15 | -2.63127 | 1 | 1 CACNA1E        | K04852 |
| ENSG00000198217 | 5.13E-15 | -2.63127 | 1 | 1 OR51H2P        | K04257 |
| ENSG00000198250 | 5.13E-15 | -2.63127 | 1 | 1 ANTXRL         | -      |
| ENSG00000198251 | 5.13E-15 | -2.63127 | 1 | 1 CTC-490E21.13  | K17685 |
| ENSG00000198261 | 5.13E-15 | -2.63127 | 1 | 1 OR5BB1P        | K04257 |
| ENSG00000198271 | 5.13E-15 | -2.63127 | 1 | 1 KRTAP4-5       | -      |
| ENSG00000198277 | 5.13E-15 | -2.63127 | 1 | 1 RP11-468N14.09 | K00699 |
| ENSG00000198283 | 5.13E-15 | -2.63127 | 1 | 1 OR5B21         | K04257 |
| ENSG00000198284 | 5.13E-15 | -2.63127 | 1 | 1 NUP210P1       | K14314 |
| ENSG00000198300 | 5.13E-15 | -2.63127 | 1 | 1 PEG3           | K09230 |
| ENSG00000198305 | 5.13E-15 | -2.63127 | 1 | 1 SPDYE8P        | K08694 |
| ENSG00000198307 | 5.13E-15 | -2.63127 | 1 | 1 H2AFB2         | K11251 |
| ENSG00000198327 | 5.13E-15 | -2.63127 | 1 | 1 HIST1H4F       | K11254 |
| ENSG00000198342 | 5.13E-15 | -2.63127 | 1 | 1 ZNF442         | K09228 |
| ENSG00000198346 | 5.13E-15 | -2.63127 | 1 | 1 ZNF813         | K09228 |
| ENSG00000198354 | 5.13E-15 | -2.63127 | 1 | 1 DCAF12L2       | K11803 |
| ENSG00000198358 | 5.13E-15 | -2.63127 | 1 | 1 RP11-544M22.1  | -      |
| ENSG00000198367 | 5.13E-15 | -2.63127 | 1 | 1 OR7A11P        | K04257 |
| ENSG00000198388 | 5.13E-15 | -2.63127 | 1 | 1 AC092291.1     | -      |
| ENSG00000198390 | 5.13E-15 | -2.63127 | 1 | 1 KRTAP13-1      | -      |
| ENSG00000198398 | 5.13E-15 | -2.63127 | 1 | 1 TMEM207        | -      |
| ENSG00000198414 | 5.13E-15 | -2.63127 | 1 | 1 TATDN2P1       | K03424 |

|                 |          |          |   |                 |        |
|-----------------|----------|----------|---|-----------------|--------|
| ENSG00000198417 | 5.13E-15 | -2.63127 | 1 | 1 MT1F          | K14739 |
| ENSG00000198429 | 5.13E-15 | -2.63127 | 1 | 1 ZNF69         | K09228 |
| ENSG00000198434 | 5.13E-15 | -2.63127 | 1 | 1 AF241725.1    | -      |
| ENSG00000198443 | 5.13E-15 | -2.63127 | 1 | 1 KRTAP4-1      | -      |
| ENSG00000198444 | 5.13E-15 | -2.63127 | 1 | 1 F8A2          | -      |
| ENSG00000198445 | 5.13E-15 | -2.63127 | 1 | 1 CCT8L2        | K09500 |
| ENSG00000198452 | 5.13E-15 | -2.63127 | 1 | 1 OR14L1P       | K04257 |
| ENSG00000198453 | 5.13E-15 | -2.63127 | 1 | 1 ZNF568        | K09228 |
| ENSG00000198454 | 5.13E-15 | -2.63127 | 1 | 1 C9orf141      | -      |
| ENSG00000198477 | 5.13E-15 | -2.63127 | 1 | 1 ZNF280B       | -      |
| ENSG00000198482 | 5.13E-15 | -2.63127 | 1 | 1 ZNF808        | K09228 |
| ENSG00000198483 | 5.13E-15 | -2.63127 | 1 | 1 ANKRD35       | -      |
| ENSG00000198488 | 5.13E-15 | -2.63127 | 1 | 1 B3GNT6        | K00739 |
| ENSG00000198491 | 5.13E-15 | -2.63127 | 1 | 1 RP11-208N14.4 | -      |
| ENSG00000198502 | 5.13E-15 | -2.63127 | 1 | 1 HLA-DRB5      | K06752 |
| ENSG00000198521 | 5.13E-15 | -2.63127 | 1 | 1 ZNF43         | -      |
| ENSG00000198526 | 5.13E-15 | -2.63127 | 1 | 1 PABPC1P2      | K13126 |
| ENSG00000198555 | 5.13E-15 | -2.63127 | 1 | 1 RP11-598D12.4 | K05039 |
| ENSG00000198558 | 5.13E-15 | -2.63127 | 1 | 1 HIST1H4L      | K11254 |
| ENSG00000198563 | 5.13E-15 | -2.63127 | 1 | 1 DDX39B        | K12812 |
| ENSG00000198573 | 5.13E-15 | -2.63127 | 1 | 1 SPANXC        | -      |
| ENSG00000198597 | 5.13E-15 | -2.63127 | 1 | 1 ZNF536        | K09228 |
| ENSG00000198601 | 5.13E-15 | -2.63127 | 1 | 1 OR2M2         | K04257 |
| ENSG00000198610 | 5.13E-15 | -2.63127 | 1 | 1 AKR1C4        | K00037 |
| ENSG00000198624 | 5.13E-15 | -2.63127 | 1 | 1 CCDC69        | K17985 |
| ENSG00000198633 | 5.13E-15 | -2.63127 | 1 | 1 ZNF534        | K09228 |
| ENSG00000198643 | 5.13E-15 | -2.63127 | 1 | 1 FAM3D         | -      |
| ENSG00000198648 | 5.13E-15 | -2.63127 | 1 | 1 STK39         | K08835 |
| ENSG00000198650 | 5.13E-15 | -2.63127 | 1 | 1 TAT           | K00815 |
| ENSG00000198657 | 5.13E-15 | -2.63127 | 1 | 1 OR8B4         | K04257 |
| ENSG00000198670 | 5.13E-15 | -2.63127 | 1 | 1 LPA           | K09644 |
| ENSG00000198671 | 5.13E-15 | -2.63127 | 1 | 1 RP11-168J19.2 | -      |
| ENSG00000198674 | 5.13E-15 | -2.63127 | 1 | 1 OR10G6        | K04257 |
| ENSG00000198678 | 5.13E-15 | -2.63127 | 1 | 1 OR5BS1P       | K04257 |
| ENSG00000198681 | 5.13E-15 | -2.63127 | 1 | 1 MAGEA1        | -      |
| ENSG00000198683 | 5.13E-15 | -2.63127 | 1 | 1 AC012615.1    | K17985 |
| ENSG00000198685 | 5.13E-15 | -2.63127 | 1 | 1 C3orf27       | K18047 |
| ENSG00000198692 | 5.13E-15 | -2.63127 | 1 | 1 EIF1AY        | K03236 |
| ENSG00000198703 | 5.13E-15 | -2.63127 | 1 | 1 OR10R3P       | K04257 |
| ENSG00000198704 | 5.13E-15 | -2.63127 | 1 | 1 GPX6          | K00432 |
| ENSG00000198719 | 5.13E-15 | -2.63127 | 1 | 1 DLL1          | K06051 |
| ENSG00000198729 | 5.13E-15 | -2.63127 | 1 | 1 PPP1R14C      | K17556 |
| ENSG00000198734 | 5.13E-15 | -2.63127 | 1 | 1 F5            | K03902 |
| ENSG00000198738 | 5.13E-15 | -2.63127 | 1 | 1 SMIM11P1      | -      |
| ENSG00000198743 | 5.13E-15 | -2.63127 | 1 | 1 SLC5A3        | K14383 |
| ENSG00000198756 | 5.13E-15 | -2.63127 | 1 | 1 COLGALT2      | K11703 |
| ENSG00000198759 | 5.13E-15 | -2.63127 | 1 | 1 EGFL6         | -      |
| ENSG00000198765 | 5.13E-15 | -2.63127 | 1 | 1 SYCP1         | K19533 |
| ENSG00000198787 | 5.13E-15 | -2.63127 | 1 | 1 OR4D12P       | K04257 |
| ENSG00000198788 | 5.13E-15 | -2.63127 | 1 | 1 MUC2          | K10955 |
| ENSG00000198797 | 5.13E-15 | -2.63127 | 1 | 1 BRINP2        | -      |
| ENSG00000198798 | 5.13E-15 | -2.63127 | 1 | 1 MAGEB3        | -      |
| ENSG00000198812 | 5.13E-15 | -2.63127 | 1 | 1 LRRC10        | K17692 |
| ENSG00000198821 | 5.13E-15 | -2.63127 | 1 | 1 CD247         | K06453 |
| ENSG00000198842 | 5.13E-15 | -2.63127 | 1 | 1 DUSP27        | K14165 |
| ENSG00000198844 | 5.13E-15 | -2.63127 | 1 | 1 ARHGEF15      | -      |
| ENSG00000198848 | 5.13E-15 | -2.63127 | 1 | 1 CES1          | K01044 |
| ENSG00000198851 | 5.13E-15 | -2.63127 | 1 | 1 CD3E          | K06451 |

|                 |          |          |   |                |        |
|-----------------|----------|----------|---|----------------|--------|
| ENSG00000198854 | 5.13E-15 | -2.63127 | 1 | 1 C1orf68      | -      |
| ENSG00000198865 | 5.13E-15 | -2.63127 | 1 | 1 CCDC152      | -      |
| ENSG00000198868 | 5.13E-15 | -2.63127 | 1 | 1 MIR4461      | K03882 |
| ENSG00000198877 | 5.13E-15 | -2.63127 | 1 | 1 OR5D13       | K04257 |
| ENSG00000198881 | 5.13E-15 | -2.63127 | 1 | 1 ASB12        | K10334 |
| ENSG00000198883 | 5.13E-15 | -2.63127 | 1 | 1 PNMA5        | -      |
| ENSG00000198885 | 5.13E-15 | -2.63127 | 1 | 1 ITPRIPL1     | -      |
| ENSG00000198889 | 5.13E-15 | -2.63127 | 1 | 1 DCAF12L1     | K11803 |
| ENSG00000198908 | 5.13E-15 | -2.63127 | 1 | 1 BHLHB9       | -      |
| ENSG00000198914 | 5.13E-15 | -2.63127 | 1 | 1 POU3F3       | K09365 |
| ENSG00000198923 | 5.13E-15 | -2.63127 | 1 | 1 RP11-290L1.7 | K11130 |
| ENSG00000198932 | 5.13E-15 | -2.63127 | 1 | 1 GPRASP1      | -      |
| ENSG00000198933 | 5.13E-15 | -2.63127 | 1 | 1 TBKBP1       | K12652 |
| ENSG00000198934 | 5.13E-15 | -2.63127 | 1 | 1 MAGEE1       | -      |
| ENSG00000198944 | 5.13E-15 | -2.63127 | 1 | 1 SOWAHA       | -      |
| ENSG00000198946 | 5.13E-15 | -2.63127 | 1 | 1 SSX4B        | K15624 |
| ENSG00000198960 | 5.13E-15 | -2.63127 | 1 | 1 ARMCX6       | -      |
| ENSG00000198963 | 5.13E-15 | -2.63127 | 1 | 1 RORB         | K08533 |
| ENSG00000198965 | 5.13E-15 | -2.63127 | 1 | 1 OR10R2       | K04257 |
| ENSG00000198967 | 5.13E-15 | -2.63127 | 1 | 1 OR10Z1       | K04257 |
| ENSG00000198972 | 5.13E-15 | -2.63127 | 1 | 1 MIRLET7E     | -      |
| ENSG00000198973 | 5.13E-15 | -2.63127 | 1 | 1 MIR375       | -      |
| ENSG00000198974 | 5.13E-15 | -2.63127 | 1 | 1 MIR30E       | -      |
| ENSG00000198975 | 5.13E-15 | -2.63127 | 1 | 1 MIRLET7A2    | -      |
| ENSG00000198976 | 5.13E-15 | -2.63127 | 1 | 1 MIR429       | -      |
| ENSG00000198982 | 5.13E-15 | -2.63127 | 1 | 1 MIR380       | -      |
| ENSG00000198983 | 5.13E-15 | -2.63127 | 1 | 1 MIR449A      | -      |
| ENSG00000198984 | 5.13E-15 | -2.63127 | 1 | 1 MIR345       | -      |
| ENSG00000198986 | 5.13E-15 | -2.63127 | 1 | 1 MIRLET7A3    | -      |
| ENSG00000198987 | 5.13E-15 | -2.63127 | 1 | 1 MIR16-2      | -      |
| ENSG00000198995 | 5.13E-15 | -2.63127 | 1 | 1 MIR340       | -      |
| ENSG00000198997 | 5.13E-15 | -2.63127 | 1 | 1 MIR107       | -      |
| ENSG00000199001 | 5.13E-15 | -2.63127 | 1 | 1 MIR448       | -      |
| ENSG00000199004 | 5.13E-15 | -2.63127 | 1 | 1 MIR21        | -      |
| ENSG00000199005 | 5.13E-15 | -2.63127 | 1 | 1 MIR370       | -      |
| ENSG00000199012 | 5.13E-15 | -2.63127 | 1 | 1 MIR412       | -      |
| ENSG00000199015 | 5.13E-15 | -2.63127 | 1 | 1 MIR377       | -      |
| ENSG00000199017 | 5.13E-15 | -2.63127 | 1 | 1 MIR1-1       | -      |
| ENSG00000199020 | 5.13E-15 | -2.63127 | 1 | 1 MIR381       | -      |
| ENSG00000199023 | 5.13E-15 | -2.63127 | 1 | 1 MIR339       | -      |
| ENSG00000199025 | 5.13E-15 | -2.63127 | 1 | 1 MIR369       | -      |
| ENSG00000199030 | 5.13E-15 | -2.63127 | 1 | 1 MIRLET7C     | -      |
| ENSG00000199031 | 5.13E-15 | -2.63127 | 1 | 1 MIR371A      | -      |
| ENSG00000199032 | 5.13E-15 | -2.63127 | 1 | 1 MIR425       | -      |
| ENSG00000199035 | 5.13E-15 | -2.63127 | 1 | 1 MIR103A1     | -      |
| ENSG00000199036 | 5.13E-15 | -2.63127 | 1 | 1 MIR219-1     | -      |
| ENSG00000199043 | 5.13E-15 | -2.63127 | 1 | 1 MIR335       | -      |
| ENSG00000199051 | 5.13E-15 | -2.63127 | 1 | 1 MIR361       | -      |
| ENSG00000199053 | 5.13E-15 | -2.63127 | 1 | 1 MIR324       | -      |
| ENSG00000199059 | 5.13E-15 | -2.63127 | 1 | 1 MIR135B      | -      |
| ENSG00000199065 | 5.13E-15 | -2.63127 | 1 | 1 MIR101-2     | -      |
| ENSG00000199066 | 5.13E-15 | -2.63127 | 1 | 1 MIR330       | -      |
| ENSG00000199069 | 5.13E-15 | -2.63127 | 1 | 1 MIR323A      | -      |
| ENSG00000199071 | 5.13E-15 | -2.63127 | 1 | 1 MIR423       | -      |
| ENSG00000199075 | 5.13E-15 | -2.63127 | 1 | 1 MIR26A1      | -      |
| ENSG00000199077 | 5.13E-15 | -2.63127 | 1 | 1 MIR129-2     | -      |
| ENSG00000199080 | 5.13E-15 | -2.63127 | 1 | 1 MIR133B      | -      |
| ENSG00000199085 | 5.13E-15 | -2.63127 | 1 | 1 MIR148A      | -      |

|                 |          |          |   |              |    |
|-----------------|----------|----------|---|--------------|----|
| ENSG00000199088 | 5.13E-15 | -2.63127 | 1 | 1 MIR379     | -- |
| ENSG00000199090 | 5.13E-15 | -2.63127 | 1 | 1 MIR326     | -- |
| ENSG00000199092 | 5.13E-15 | -2.63127 | 1 | 1 MIR410     | -- |
| ENSG00000199095 | 5.13E-15 | -2.63127 | 1 | 1 MIR372     | -- |
| ENSG00000199102 | 5.13E-15 | -2.63127 | 1 | 1 MIR302C    | -- |
| ENSG00000199104 | 5.13E-15 | -2.63127 | 1 | 1 MIR346     | -- |
| ENSG00000199107 | 5.13E-15 | -2.63127 | 1 | 1 MIR409     | -- |
| ENSG00000199109 | 5.13E-15 | -2.63127 | 1 | 1 MIR411     | -- |
| ENSG00000199121 | 5.13E-15 | -2.63127 | 1 | 1 MIR26B     | -- |
| ENSG00000199122 | 5.13E-15 | -2.63127 | 1 | 1 MIR148B    | -- |
| ENSG00000199127 | 5.13E-15 | -2.63127 | 1 | 1 MIR383     | -- |
| ENSG00000199135 | 5.13E-15 | -2.63127 | 1 | 1 MIR101-1   | -- |
| ENSG00000199143 | 5.13E-15 | -2.63127 | 1 | 1 MIR373     | -- |
| ENSG00000199145 | 5.13E-15 | -2.63127 | 1 | 1 MIR302D    | -- |
| ENSG00000199150 | 5.13E-15 | -2.63127 | 1 | 1 MIRLET7G   | -- |
| ENSG00000199151 | 5.13E-15 | -2.63127 | 1 | 1 MIR337     | -- |
| ENSG00000199153 | 5.13E-15 | -2.63127 | 1 | 1 MIR30D     | -- |
| ENSG00000199156 | 5.13E-15 | -2.63127 | 1 | 1 MIR422A    | -- |
| ENSG00000199157 | 5.13E-15 | -2.63127 | 1 | 1 MIR208A    | -- |
| ENSG00000199158 | 5.13E-15 | -2.63127 | 1 | 1 MIR96      | -- |
| ENSG00000199161 | 5.13E-15 | -2.63127 | 1 | 1 MIR126     | -- |
| ENSG00000199165 | 5.13E-15 | -2.63127 | 1 | 1 MIRLET7A1  | -- |
| ENSG00000199168 | 5.13E-15 | -2.63127 | 1 | 1 MIR374A    | -- |
| ENSG00000199169 | 5.13E-15 | -2.63127 | 1 | 1 MIR367     | -- |
| ENSG00000199172 | 5.13E-15 | -2.63127 | 1 | 1 MIR331     | -- |
| ENSG00000199187 | 5.13E-15 | -2.63127 | 1 | 1 MIR365B    | -- |
| ENSG00000199196 | 5.13E-15 | -2.63127 | 1 | 1 SNORA25    | -- |
| ENSG00000199197 | 5.13E-15 | -2.63127 | 1 | 1 RN7SKP72   | -- |
| ENSG00000199200 | 5.13E-15 | -2.63127 | 1 | 1 Y_RNA      | -- |
| ENSG00000199201 | 5.13E-15 | -2.63127 | 1 | 1 Y_RNA      | -- |
| ENSG00000199202 | 5.13E-15 | -2.63127 | 1 | 1 RNA5SP289  | -- |
| ENSG00000199203 | 5.13E-15 | -2.63127 | 1 | 1 Y_RNA      | -- |
| ENSG00000199204 | 5.13E-15 | -2.63127 | 1 | 1 Y_RNA      | -- |
| ENSG00000199212 | 5.13E-15 | -2.63127 | 1 | 1 RNU105C    | -- |
| ENSG00000199214 | 5.13E-15 | -2.63127 | 1 | 1 Y_RNA      | -- |
| ENSG00000199217 | 5.13E-15 | -2.63127 | 1 | 1 RNU6-1123P | -- |
| ENSG00000199218 | 5.13E-15 | -2.63127 | 1 | 1 RN7SKP184  | -- |
| ENSG00000199219 | 5.13E-15 | -2.63127 | 1 | 1 RNU6-500P  | -- |
| ENSG00000199220 | 5.13E-15 | -2.63127 | 1 | 1 Y_RNA      | -- |
| ENSG00000199222 | 5.13E-15 | -2.63127 | 1 | 1 Y_RNA      | -- |
| ENSG00000199223 | 5.13E-15 | -2.63127 | 1 | 1 Y_RNA      | -- |
| ENSG00000199224 | 5.13E-15 | -2.63127 | 1 | 1 Y_RNA      | -- |
| ENSG00000199231 | 5.13E-15 | -2.63127 | 1 | 1 snoU2_19   | -- |
| ENSG00000199235 | 5.13E-15 | -2.63127 | 1 | 1 RNU6-1063P | -- |
| ENSG00000199237 | 5.13E-15 | -2.63127 | 1 | 1 RNU6-834P  | -- |
| ENSG00000199240 | 5.13E-15 | -2.63127 | 1 | 1 RNA5SP46   | -- |
| ENSG00000199241 | 5.13E-15 | -2.63127 | 1 | 1 Y_RNA      | -- |
| ENSG00000199245 | 5.13E-15 | -2.63127 | 1 | 1 Y_RNA      | -- |
| ENSG00000199246 | 5.13E-15 | -2.63127 | 1 | 1 RNU6-896P  | -- |
| ENSG00000199248 | 5.13E-15 | -2.63127 | 1 | 1 RNU6-28P   | -- |
| ENSG00000199251 | 5.13E-15 | -2.63127 | 1 | 1 RNU6-664P  | -- |
| ENSG00000199260 | 5.13E-15 | -2.63127 | 1 | 1 RNU6-874P  | -- |
| ENSG00000199262 | 5.13E-15 | -2.63127 | 1 | 1 MIR3607    | -- |
| ENSG00000199263 | 5.13E-15 | -2.63127 | 1 | 1 Y_RNA      | -- |
| ENSG00000199270 | 5.13E-15 | -2.63127 | 1 | 1 RNA5S12    | -- |
| ENSG00000199272 | 5.13E-15 | -2.63127 | 1 | 1 RNU6-349P  | -- |
| ENSG00000199273 | 5.13E-15 | -2.63127 | 1 | 1 Y_RNA      | -- |
| ENSG00000199276 | 5.13E-15 | -2.63127 | 1 | 1 RNA5SP26   | -- |

|                 |          |          |   |               |    |
|-----------------|----------|----------|---|---------------|----|
| ENSG00000199279 | 5.13E-15 | -2.63127 | 1 | 1 RNU6-661P   | -- |
| ENSG00000199282 | 5.13E-15 | -2.63127 | 1 | 1 SNORA9      | -- |
| ENSG00000199283 | 5.13E-15 | -2.63127 | 1 | 1 RNU1-58P    | -- |
| ENSG00000199285 | 5.13E-15 | -2.63127 | 1 | 1 Y_RNA       | -- |
| ENSG00000199286 | 5.13E-15 | -2.63127 | 1 | 1 RNU6-1094P  | -- |
| ENSG00000199287 | 5.13E-15 | -2.63127 | 1 | 1 Y_RNA       | -- |
| ENSG00000199289 | 5.13E-15 | -2.63127 | 1 | 1 RNU6-502P   | -- |
| ENSG00000199290 | 5.13E-15 | -2.63127 | 1 | 1 Y_RNA       | -- |
| ENSG00000199291 | 5.13E-15 | -2.63127 | 1 | 1 Y_RNA       | -- |
| ENSG00000199293 | 5.13E-15 | -2.63127 | 1 | 1 SNORA21     | -- |
| ENSG00000199295 | 5.13E-15 | -2.63127 | 1 | 1 RNU6-1312P  | -- |
| ENSG00000199299 | 5.13E-15 | -2.63127 | 1 | 1 RNA5SP430   | -- |
| ENSG00000199301 | 5.13E-15 | -2.63127 | 1 | 1 RNU6-208P   | -- |
| ENSG00000199303 | 5.13E-15 | -2.63127 | 1 | 1 Y_RNA       | -- |
| ENSG00000199306 | 5.13E-15 | -2.63127 | 1 | 1 RNU6-858P   | -- |
| ENSG00000199308 | 5.13E-15 | -2.63127 | 1 | 1 RNU6-222P   | -- |
| ENSG00000199311 | 5.13E-15 | -2.63127 | 1 | 1 SNORD115-34 | -- |
| ENSG00000199313 | 5.13E-15 | -2.63127 | 1 | 1 RNU4-82P    | -- |
| ENSG00000199315 | 5.13E-15 | -2.63127 | 1 | 1 RNA5SP347   | -- |
| ENSG00000199318 | 5.13E-15 | -2.63127 | 1 | 1 RNA5SP52    | -- |
| ENSG00000199319 | 5.13E-15 | -2.63127 | 1 | 1 RN7SKP25    | -- |
| ENSG00000199321 | 5.13E-15 | -2.63127 | 1 | 1 SNORD60     | -- |
| ENSG00000199322 | 5.13E-15 | -2.63127 | 1 | 1 RNA5SP183   | -- |
| ENSG00000199325 | 5.13E-15 | -2.63127 | 1 | 1 RNU4-39P    | -- |
| ENSG00000199326 | 5.13E-15 | -2.63127 | 1 | 1 RNU6-1298P  | -- |
| ENSG00000199327 | 5.13E-15 | -2.63127 | 1 | 1 RNU6-230P   | -- |
| ENSG00000199332 | 5.13E-15 | -2.63127 | 1 | 1 Y_RNA       | -- |
| ENSG00000199334 | 5.13E-15 | -2.63127 | 1 | 1 RNA5S11     | -- |
| ENSG00000199335 | 5.13E-15 | -2.63127 | 1 | 1 RNU6-204P   | -- |
| ENSG00000199337 | 5.13E-15 | -2.63127 | 1 | 1 RNA5S3      | -- |
| ENSG00000199347 | 5.13E-15 | -2.63127 | 1 | 1 RNU5E-1     | -- |
| ENSG00000199348 | 5.13E-15 | -2.63127 | 1 | 1 RNU6-766P   | -- |
| ENSG00000199349 | 5.13E-15 | -2.63127 | 1 | 1 Y_RNA       | -- |
| ENSG00000199350 | 5.13E-15 | -2.63127 | 1 | 1 RNA5SP432   | -- |
| ENSG00000199352 | 5.13E-15 | -2.63127 | 1 | 1 RNA5S1      | -- |
| ENSG00000199354 | 5.13E-15 | -2.63127 | 1 | 1 RNA5SP273   | -- |
| ENSG00000199357 | 5.13E-15 | -2.63127 | 1 | 1 Y_RNA       | -- |
| ENSG00000199360 | 5.13E-15 | -2.63127 | 1 | 1 RNU6-1115P  | -- |
| ENSG00000199361 | 5.13E-15 | -2.63127 | 1 | 1 RNU1-150P   | -- |
| ENSG00000199362 | 5.13E-15 | -2.63127 | 1 | 1 Y_RNA       | -- |
| ENSG00000199363 | 5.13E-15 | -2.63127 | 1 | 1 SNORA63     | -- |
| ENSG00000199364 | 5.13E-15 | -2.63127 | 1 | 1 RNA5SP327   | -- |
| ENSG00000199366 | 5.13E-15 | -2.63127 | 1 | 1 Y_RNA       | -- |
| ENSG00000199368 | 5.13E-15 | -2.63127 | 1 | 1 RNU6-1084P  | -- |
| ENSG00000199370 | 5.13E-15 | -2.63127 | 1 | 1 U3          | -- |
| ENSG00000199373 | 5.13E-15 | -2.63127 | 1 | 1 RNA5SP453   | -- |
| ENSG00000199377 | 5.13E-15 | -2.63127 | 1 | 1 RNU5F-1     | -- |
| ENSG00000199378 | 5.13E-15 | -2.63127 | 1 | 1 Y_RNA       | -- |
| ENSG00000199381 | 5.13E-15 | -2.63127 | 1 | 1 RNU6-79P    | -- |
| ENSG00000199385 | 5.13E-15 | -2.63127 | 1 | 1 RNU6-369P   | -- |
| ENSG00000199390 | 5.13E-15 | -2.63127 | 1 | 1 SNORD114-7  | -- |
| ENSG00000199392 | 5.13E-15 | -2.63127 | 1 | 1 SNORA25     | -- |
| ENSG00000199394 | 5.13E-15 | -2.63127 | 1 | 1 RNU6-600P   | -- |
| ENSG00000199395 | 5.13E-15 | -2.63127 | 1 | 1 RNA5SP93    | -- |
| ENSG00000199396 | 5.13E-15 | -2.63127 | 1 | 1 RNA5S5      | -- |
| ENSG00000199398 | 5.13E-15 | -2.63127 | 1 | 1 Y_RNA       | -- |
| ENSG00000199400 | 5.13E-15 | -2.63127 | 1 | 1 RNY4P19     | -- |
| ENSG00000199402 | 5.13E-15 | -2.63127 | 1 | 1 RNA5SP308   | -- |

|                 |          |          |   |               |    |
|-----------------|----------|----------|---|---------------|----|
| ENSG00000199404 | 5.13E-15 | -2.63127 | 1 | 1 RNA5SP250   | -- |
| ENSG00000199405 | 5.13E-15 | -2.63127 | 1 | 1 SNORA1      | -- |
| ENSG00000199407 | 5.13E-15 | -2.63127 | 1 | 1 RNA5SP301   | -- |
| ENSG00000199409 | 5.13E-15 | -2.63127 | 1 | 1 Y_RNA       | -- |
| ENSG00000199410 | 5.13E-15 | -2.63127 | 1 | 1 Y_RNA       | -- |
| ENSG00000199411 | 5.13E-15 | -2.63127 | 1 | 1 SNORD62     | -- |
| ENSG00000199420 | 5.13E-15 | -2.63127 | 1 | 1 RN7SKP170   | -- |
| ENSG00000199422 | 5.13E-15 | -2.63127 | 1 | 1 VTRNA3-1P   | -- |
| ENSG00000199424 | 5.13E-15 | -2.63127 | 1 | 1 Y_RNA       | -- |
| ENSG00000199426 | 5.13E-15 | -2.63127 | 1 | 1 RNU1-108P   | -- |
| ENSG00000199432 | 5.13E-15 | -2.63127 | 1 | 1 Y_RNA       | -- |
| ENSG00000199436 | 5.13E-15 | -2.63127 | 1 | 1 SNORD9      | -- |
| ENSG00000199440 | 5.13E-15 | -2.63127 | 1 | 1 Y_RNA       | -- |
| ENSG00000199442 | 5.13E-15 | -2.63127 | 1 | 1 Y_RNA       | -- |
| ENSG00000199444 | 5.13E-15 | -2.63127 | 1 | 1 Y_RNA       | -- |
| ENSG00000199446 | 5.13E-15 | -2.63127 | 1 | 1 RNU6-543P   | -- |
| ENSG00000199448 | 5.13E-15 | -2.63127 | 1 | 1 RNU6-845P   | -- |
| ENSG00000199450 | 5.13E-15 | -2.63127 | 1 | 1 RNA5SP276   | -- |
| ENSG00000199453 | 5.13E-15 | -2.63127 | 1 | 1 SNORD115-12 | -- |
| ENSG00000199454 | 5.13E-15 | -2.63127 | 1 | 1 RNA5SP388   | -- |
| ENSG00000199455 | 5.13E-15 | -2.63127 | 1 | 1 RNA5SP191   | -- |
| ENSG00000199458 | 5.13E-15 | -2.63127 | 1 | 1 RNU4-35P    | -- |
| ENSG00000199459 | 5.13E-15 | -2.63127 | 1 | 1 Y_RNA       | -- |
| ENSG00000199460 | 5.13E-15 | -2.63127 | 1 | 1 RNU6-1216P  | -- |
| ENSG00000199461 | 5.13E-15 | -2.63127 | 1 | 1 Y_RNA       | -- |
| ENSG00000199468 | 5.13E-15 | -2.63127 | 1 | 1 RNU6-556P   | -- |
| ENSG00000199469 | 5.13E-15 | -2.63127 | 1 | 1 RNU1-62P    | -- |
| ENSG00000199470 | 5.13E-15 | -2.63127 | 1 | 1 SNORA64     | -- |
| ENSG00000199472 | 5.13E-15 | -2.63127 | 1 | 1 Y_RNA       | -- |
| ENSG00000199473 | 5.13E-15 | -2.63127 | 1 | 1 SNORA63     | -- |
| ENSG00000199474 | 5.13E-15 | -2.63127 | 1 | 1 SNORA27     | -- |
| ENSG00000199475 | 5.13E-15 | -2.63127 | 1 | 1 RN7SKP104   | -- |
| ENSG00000199480 | 5.13E-15 | -2.63127 | 1 | 1 RNA5SP357   | -- |
| ENSG00000199482 | 5.13E-15 | -2.63127 | 1 | 1 RNU6-633P   | -- |
| ENSG00000199483 | 5.13E-15 | -2.63127 | 1 | 1 RNU4-15P    | -- |
| ENSG00000199487 | 5.13E-15 | -2.63127 | 1 | 1 Y_RNA       | -- |
| ENSG00000199488 | 5.13E-15 | -2.63127 | 1 | 1 RNU1-70P    | -- |
| ENSG00000199489 | 5.13E-15 | -2.63127 | 1 | 1 SNORD115-25 | -- |
| ENSG00000199490 | 5.13E-15 | -2.63127 | 1 | 1 Y_RNA       | -- |
| ENSG00000199492 | 5.13E-15 | -2.63127 | 1 | 1 RNU6-1313P  | -- |
| ENSG00000199497 | 5.13E-15 | -2.63127 | 1 | 1 RNU1-94P    | -- |
| ENSG00000199506 | 5.13E-15 | -2.63127 | 1 | 1 RNU6-247P   | -- |
| ENSG00000199508 | 5.13E-15 | -2.63127 | 1 | 1 RNA5SP110   | -- |
| ENSG00000199512 | 5.13E-15 | -2.63127 | 1 | 1 RNU6-212P   | -- |
| ENSG00000199514 | 5.13E-15 | -2.63127 | 1 | 1 RNU6-235P   | -- |
| ENSG00000199515 | 5.13E-15 | -2.63127 | 1 | 1 Y_RNA       | -- |
| ENSG00000199516 | 5.13E-15 | -2.63127 | 1 | 1 Y_RNA       | -- |
| ENSG00000199520 | 5.13E-15 | -2.63127 | 1 | 1 RNU6-386P   | -- |
| ENSG00000199523 | 5.13E-15 | -2.63127 | 1 | 1 RNA5SP226   | -- |
| ENSG00000199525 | 5.13E-15 | -2.63127 | 1 | 1 RNA5SP295   | -- |
| ENSG00000199529 | 5.13E-15 | -2.63127 | 1 | 1 RNU6-462P   | -- |
| ENSG00000199530 | 5.13E-15 | -2.63127 | 1 | 1 Y_RNA       | -- |
| ENSG00000199535 | 5.13E-15 | -2.63127 | 1 | 1 RNA5SP305   | -- |
| ENSG00000199536 | 5.13E-15 | -2.63127 | 1 | 1 RNU6-315P   | -- |
| ENSG00000199540 | 5.13E-15 | -2.63127 | 1 | 1 Y_RNA       | -- |
| ENSG00000199546 | 5.13E-15 | -2.63127 | 1 | 1 Y_RNA       | -- |
| ENSG00000199551 | 5.13E-15 | -2.63127 | 1 | 1 RNU6-545P   | -- |
| ENSG00000199552 | 5.13E-15 | -2.63127 | 1 | 1 SNORA63     | -- |



|                 |          |          |   |               |    |
|-----------------|----------|----------|---|---------------|----|
| ENSG00000199556 | 5.13E-15 | -2.63127 | 1 | 1 RNA5SP361   | -- |
| ENSG00000199562 | 5.13E-15 | -2.63127 | 1 | 1 RNU6-37P    | -- |
| ENSG00000199564 | 5.13E-15 | -2.63127 | 1 | 1 RNA5SP502   | -- |
| ENSG00000199565 | 5.13E-15 | -2.63127 | 1 | 1 Y_RNA       | -- |
| ENSG00000199566 | 5.13E-15 | -2.63127 | 1 | 1 SNORA64     | -- |
| ENSG00000199567 | 5.13E-15 | -2.63127 | 1 | 1 Y_RNA       | -- |
| ENSG00000199570 | 5.13E-15 | -2.63127 | 1 | 1 RNU6-228P   | -- |
| ENSG00000199571 | 5.13E-15 | -2.63127 | 1 | 1 SNORA22     | -- |
| ENSG00000199572 | 5.13E-15 | -2.63127 | 1 | 1 RNA5SP174   | -- |
| ENSG00000199574 | 5.13E-15 | -2.63127 | 1 | 1 SNORD18C    | -- |
| ENSG00000199575 | 5.13E-15 | -2.63127 | 1 | 1 SNORD114-1  | -- |
| ENSG00000199577 | 5.13E-15 | -2.63127 | 1 | 1 RNU6-822P   | -- |
| ENSG00000199580 | 5.13E-15 | -2.63127 | 1 | 1 Y_RNA       | -- |
| ENSG00000199584 | 5.13E-15 | -2.63127 | 1 | 1 Y_RNA       | -- |
| ENSG00000199585 | 5.13E-15 | -2.63127 | 1 | 1 RNA5SP119   | -- |
| ENSG00000199591 | 5.13E-15 | -2.63127 | 1 | 1 Y_RNA       | -- |
| ENSG00000199592 | 5.13E-15 | -2.63127 | 1 | 1 RNA5SP321   | -- |
| ENSG00000199593 | 5.13E-15 | -2.63127 | 1 | 1 SNORD114-14 | -- |
| ENSG00000199594 | 5.13E-15 | -2.63127 | 1 | 1 RNU6-1301P  | -- |
| ENSG00000199595 | 5.13E-15 | -2.63127 | 1 | 1 Y_RNA       | -- |
| ENSG00000199598 | 5.13E-15 | -2.63127 | 1 | 1 RNU6-859P   | -- |
| ENSG00000199601 | 5.13E-15 | -2.63127 | 1 | 1 RNU6-562P   | -- |
| ENSG00000199603 | 5.13E-15 | -2.63127 | 1 | 1 RNU6-951P   | -- |
| ENSG00000199605 | 5.13E-15 | -2.63127 | 1 | 1 RNY4P24     | -- |
| ENSG00000199609 | 5.13E-15 | -2.63127 | 1 | 1 RNA5SP124   | -- |
| ENSG00000199620 | 5.13E-15 | -2.63127 | 1 | 1 RNA5SP258   | -- |
| ENSG00000199622 | 5.13E-15 | -2.63127 | 1 | 1 RN7SKP20    | -- |
| ENSG00000199626 | 5.13E-15 | -2.63127 | 1 | 1 RNU6-989P   | -- |
| ENSG00000199627 | 5.13E-15 | -2.63127 | 1 | 1 RNU6-1010P  | -- |
| ENSG00000199629 | 5.13E-15 | -2.63127 | 1 | 1 RNU1-14P    | -- |
| ENSG00000199630 | 5.13E-15 | -2.63127 | 1 | 1 Y_RNA       | -- |
| ENSG00000199631 | 5.13E-15 | -2.63127 | 1 | 1 SNORD33     | -- |
| ENSG00000199633 | 5.13E-15 | -2.63127 | 1 | 1 SNORA63     | -- |
| ENSG00000199634 | 5.13E-15 | -2.63127 | 1 | 1 RNU4-79P    | -- |
| ENSG00000199635 | 5.13E-15 | -2.63127 | 1 | 1 Y_RNA       | -- |
| ENSG00000199636 | 5.13E-15 | -2.63127 | 1 | 1 Y_RNA       | -- |
| ENSG00000199638 | 5.13E-15 | -2.63127 | 1 | 1 RNA5SP319   | -- |
| ENSG00000199640 | 5.13E-15 | -2.63127 | 1 | 1 RN7SKP294   | -- |
| ENSG00000199641 | 5.13E-15 | -2.63127 | 1 | 1 Y_RNA       | -- |
| ENSG00000199643 | 5.13E-15 | -2.63127 | 1 | 1 RNU4-90P    | -- |
| ENSG00000199645 | 5.13E-15 | -2.63127 | 1 | 1 RNU6-1330P  | -- |
| ENSG00000199646 | 5.13E-15 | -2.63127 | 1 | 1 RNU6-1272P  | -- |
| ENSG00000199652 | 5.13E-15 | -2.63127 | 1 | 1 RNU1-35P    | -- |
| ENSG00000199666 | 5.13E-15 | -2.63127 | 1 | 1 U3          | -- |
| ENSG00000199667 | 5.13E-15 | -2.63127 | 1 | 1 Y_RNA       | -- |
| ENSG00000199672 | 5.13E-15 | -2.63127 | 1 | 1 RNU4-21P    | -- |
| ENSG00000199673 | 5.13E-15 | -2.63127 | 1 | 1 SNORD16     | -- |
| ENSG00000199674 | 5.13E-15 | -2.63127 | 1 | 1 RNU6-862P   | -- |
| ENSG00000199677 | 5.13E-15 | -2.63127 | 1 | 1 Y_RNA       | -- |
| ENSG00000199678 | 5.13E-15 | -2.63127 | 1 | 1 RNY4P5      | -- |
| ENSG00000199683 | 5.13E-15 | -2.63127 | 1 | 1 RN7SKP185   | -- |
| ENSG00000199687 | 5.13E-15 | -2.63127 | 1 | 1 RNU1-38P    | -- |
| ENSG00000199691 | 5.13E-15 | -2.63127 | 1 | 1 RN7SKP173   | -- |
| ENSG00000199695 | 5.13E-15 | -2.63127 | 1 | 1 RNU6-1128P  | -- |
| ENSG00000199697 | 5.13E-15 | -2.63127 | 1 | 1 RNU6-446P   | -- |
| ENSG00000199698 | 5.13E-15 | -2.63127 | 1 | 1 Y_RNA       | -- |
| ENSG00000199700 | 5.13E-15 | -2.63127 | 1 | 1 RNU6-223P   | -- |
| ENSG00000199701 | 5.13E-15 | -2.63127 | 1 | 1 Y_RNA       | -- |

|                 |          |          |   |               |    |
|-----------------|----------|----------|---|---------------|----|
| ENSG00000199702 | 5.13E-15 | -2.63127 | 1 | 1 RNU6-170P   | -- |
| ENSG00000199704 | 5.13E-15 | -2.63127 | 1 | 1 SNORD115-29 | -- |
| ENSG00000199705 | 5.13E-15 | -2.63127 | 1 | 1 Y_RNA       | -- |
| ENSG00000199709 | 5.13E-15 | -2.63127 | 1 | 1 RNU4-23P    | -- |
| ENSG00000199710 | 5.13E-15 | -2.63127 | 1 | 1 Y_RNA       | -- |
| ENSG00000199711 | 5.13E-15 | -2.63127 | 1 | 1 Y_RNA       | -- |
| ENSG00000199712 | 5.13E-15 | -2.63127 | 1 | 1 SNORD115-2  | -- |
| ENSG00000199713 | 5.13E-15 | -2.63127 | 1 | 1 U8          | -- |
| ENSG00000199715 | 5.13E-15 | -2.63127 | 1 | 1 Y_RNA       | -- |
| ENSG00000199716 | 5.13E-15 | -2.63127 | 1 | 1 Y_RNA       | -- |
| ENSG00000199727 | 5.13E-15 | -2.63127 | 1 | 1 U3          | -- |
| ENSG00000199728 | 5.13E-15 | -2.63127 | 1 | 1 RNU6-655P   | -- |
| ENSG00000199730 | 5.13E-15 | -2.63127 | 1 | 1 RN7SKP95    | -- |
| ENSG00000199731 | 5.13E-15 | -2.63127 | 1 | 1 RNU6-1079P  | -- |
| ENSG00000199733 | 5.13E-15 | -2.63127 | 1 | 1 RNA5SP307   | -- |
| ENSG00000199735 | 5.13E-15 | -2.63127 | 1 | 1 RNU6-227P   | -- |
| ENSG00000199739 | 5.13E-15 | -2.63127 | 1 | 1 RNU6-552P   | -- |
| ENSG00000199740 | 5.13E-15 | -2.63127 | 1 | 1 Y_RNA       | -- |
| ENSG00000199744 | 5.13E-15 | -2.63127 | 1 | 1 SNORD36A    | -- |
| ENSG00000199751 | 5.13E-15 | -2.63127 | 1 | 1 Y_RNA       | -- |
| ENSG00000199756 | 5.13E-15 | -2.63127 | 1 | 1 Y_RNA       | -- |
| ENSG00000199762 | 5.13E-15 | -2.63127 | 1 | 1 Y_RNA       | -- |
| ENSG00000199764 | 5.13E-15 | -2.63127 | 1 | 1 Y_RNA       | -- |
| ENSG00000199765 | 5.13E-15 | -2.63127 | 1 | 1 RNU6-363P   | -- |
| ENSG00000199767 | 5.13E-15 | -2.63127 | 1 | 1 RNU6-78P    | -- |
| ENSG00000199769 | 5.13E-15 | -2.63127 | 1 | 1 U3          | -- |
| ENSG00000199771 | 5.13E-15 | -2.63127 | 1 | 1 RNA5SP426   | -- |
| ENSG00000199773 | 5.13E-15 | -2.63127 | 1 | 1 RNU1-76P    | -- |
| ENSG00000199780 | 5.13E-15 | -2.63127 | 1 | 1 Y_RNA       | -- |
| ENSG00000199781 | 5.13E-15 | -2.63127 | 1 | 1 Y_RNA       | -- |
| ENSG00000199782 | 5.13E-15 | -2.63127 | 1 | 1 SNORD115-9  | -- |
| ENSG00000199783 | 5.13E-15 | -2.63127 | 1 | 1 SNORD56     | -- |
| ENSG00000199784 | 5.13E-15 | -2.63127 | 1 | 1 RNU6-1287P  | -- |
| ENSG00000199785 | 5.13E-15 | -2.63127 | 1 | 1 SNORA52     | -- |
| ENSG00000199786 | 5.13E-15 | -2.63127 | 1 | 1 RNA5SP188   | -- |
| ENSG00000199788 | 5.13E-15 | -2.63127 | 1 | 1 RNY3P2      | -- |
| ENSG00000199790 | 5.13E-15 | -2.63127 | 1 | 1 RNU6-836P   | -- |
| ENSG00000199791 | 5.13E-15 | -2.63127 | 1 | 1 RNU6-451P   | -- |
| ENSG00000199792 | 5.13E-15 | -2.63127 | 1 | 1 RNU6-1233P  | -- |
| ENSG00000199796 | 5.13E-15 | -2.63127 | 1 | 1 RNU6-924P   | -- |
| ENSG00000199797 | 5.13E-15 | -2.63127 | 1 | 1 Y_RNA       | -- |
| ENSG00000199798 | 5.13E-15 | -2.63127 | 1 | 1 SNORD114-5  | -- |
| ENSG00000199801 | 5.13E-15 | -2.63127 | 1 | 1 Y_RNA       | -- |
| ENSG00000199803 | 5.13E-15 | -2.63127 | 1 | 1 RNU6-1159P  | -- |
| ENSG00000199805 | 5.13E-15 | -2.63127 | 1 | 1 RNU1-134P   | -- |
| ENSG00000199809 | 5.13E-15 | -2.63127 | 1 | 1 RNA5SP374   | -- |
| ENSG00000199812 | 5.13E-15 | -2.63127 | 1 | 1 RNU6-428P   | -- |
| ENSG00000199814 | 5.13E-15 | -2.63127 | 1 | 1 RNU6-1260P  | -- |
| ENSG00000199824 | 5.13E-15 | -2.63127 | 1 | 1 RNU6-199P   | -- |
| ENSG00000199827 | 5.13E-15 | -2.63127 | 1 | 1 RNU6-1290P  | -- |
| ENSG00000199831 | 5.13E-15 | -2.63127 | 1 | 1 RN7SKP291   | -- |
| ENSG00000199833 | 5.13E-15 | -2.63127 | 1 | 1 SNORD115-21 | -- |
| ENSG00000199837 | 5.13E-15 | -2.63127 | 1 | 1 RNA5SP71    | -- |
| ENSG00000199839 | 5.13E-15 | -2.63127 | 1 | 1 RNA5SP150   | -- |
| ENSG00000199840 | 5.13E-15 | -2.63127 | 1 | 1 Y_RNA       | -- |
| ENSG00000199843 | 5.13E-15 | -2.63127 | 1 | 1 RNA5SP358   | -- |
| ENSG00000199845 | 5.13E-15 | -2.63127 | 1 | 1 RNA5SP375   | -- |
| ENSG00000199849 | 5.13E-15 | -2.63127 | 1 | 1 RNU5F-6P    | -- |

|                 |          |          |   |               |    |
|-----------------|----------|----------|---|---------------|----|
| ENSG00000199855 | 5.13E-15 | -2.63127 | 1 | 1 RNU6-490P   | -- |
| ENSG00000199856 | 5.13E-15 | -2.63127 | 1 | 1 U3          | -- |
| ENSG00000199857 | 5.13E-15 | -2.63127 | 1 | 1 SNORD50     | -- |
| ENSG00000199858 | 5.13E-15 | -2.63127 | 1 | 1 RNU6-1120P  | -- |
| ENSG00000199859 | 5.13E-15 | -2.63127 | 1 | 1 RNU6-582P   | -- |
| ENSG00000199862 | 5.13E-15 | -2.63127 | 1 | 1 Y_RNA       | -- |
| ENSG00000199865 | 5.13E-15 | -2.63127 | 1 | 1 RNU6-495P   | -- |
| ENSG00000199866 | 5.13E-15 | -2.63127 | 1 | 1 Y_RNA       | -- |
| ENSG00000199867 | 5.13E-15 | -2.63127 | 1 | 1 Y_RNA       | -- |
| ENSG00000199870 | 5.13E-15 | -2.63127 | 1 | 1 Y_RNA       | -- |
| ENSG00000199872 | 5.13E-15 | -2.63127 | 1 | 1 RNU6-942P   | -- |
| ENSG00000199874 | 5.13E-15 | -2.63127 | 1 | 1 RNA5SP452   | -- |
| ENSG00000199876 | 5.13E-15 | -2.63127 | 1 | 1 RN7SKP131   | -- |
| ENSG00000199878 | 5.13E-15 | -2.63127 | 1 | 1 RN7SKP149   | -- |
| ENSG00000199879 | 5.13E-15 | -2.63127 | 1 | 1 RNU1-120P   | -- |
| ENSG00000199880 | 5.13E-15 | -2.63127 | 1 | 1 RNU6-888P   | -- |
| ENSG00000199881 | 5.13E-15 | -2.63127 | 1 | 1 Y_RNA       | -- |
| ENSG00000199883 | 5.13E-15 | -2.63127 | 1 | 1 RN7SKP90    | -- |
| ENSG00000199884 | 5.13E-15 | -2.63127 | 1 | 1 Y_RNA       | -- |
| ENSG00000199885 | 5.13E-15 | -2.63127 | 1 | 1 RNU6-330P   | -- |
| ENSG00000199886 | 5.13E-15 | -2.63127 | 1 | 1 RNU6-249P   | -- |
| ENSG00000199892 | 5.13E-15 | -2.63127 | 1 | 1 RNU1-17P    | -- |
| ENSG00000199894 | 5.13E-15 | -2.63127 | 1 | 1 snoU2_19    | -- |
| ENSG00000199895 | 5.13E-15 | -2.63127 | 1 | 1 Y_RNA       | -- |
| ENSG00000199899 | 5.13E-15 | -2.63127 | 1 | 1 Y_RNA       | -- |
| ENSG00000199901 | 5.13E-15 | -2.63127 | 1 | 1 Y_RNA       | -- |
| ENSG00000199903 | 5.13E-15 | -2.63127 | 1 | 1 RNU6-1273P  | -- |
| ENSG00000199905 | 5.13E-15 | -2.63127 | 1 | 1 RNU6-492P   | -- |
| ENSG00000199910 | 5.13E-15 | -2.63127 | 1 | 1 RNA5S10     | -- |
| ENSG00000199911 | 5.13E-15 | -2.63127 | 1 | 1 Y_RNA       | -- |
| ENSG00000199912 | 5.13E-15 | -2.63127 | 1 | 1 Y_RNA       | -- |
| ENSG00000199913 | 5.13E-15 | -2.63127 | 1 | 1 Y_RNA       | -- |
| ENSG00000199914 | 5.13E-15 | -2.63127 | 1 | 1 SNORD114-16 | -- |
| ENSG00000199920 | 5.13E-15 | -2.63127 | 1 | 1 RNU4-44P    | -- |
| ENSG00000199921 | 5.13E-15 | -2.63127 | 1 | 1 RNU6-161P   | -- |
| ENSG00000199924 | 5.13E-15 | -2.63127 | 1 | 1 RNU6-1252P  | -- |
| ENSG00000199927 | 5.13E-15 | -2.63127 | 1 | 1 U3          | -- |
| ENSG00000199929 | 5.13E-15 | -2.63127 | 1 | 1 RNA5SP405   | -- |
| ENSG00000199932 | 5.13E-15 | -2.63127 | 1 | 1 RNU1-18P    | -- |
| ENSG00000199934 | 5.13E-15 | -2.63127 | 1 | 1 SNORD81     | -- |
| ENSG00000199938 | 5.13E-15 | -2.63127 | 1 | 1 Y_RNA       | -- |
| ENSG00000199940 | 5.13E-15 | -2.63127 | 1 | 1 RN7SKP75    | -- |
| ENSG00000199942 | 5.13E-15 | -2.63127 | 1 | 1 SNORD114-19 | -- |
| ENSG00000199944 | 5.13E-15 | -2.63127 | 1 | 1 RNU6-653P   | -- |
| ENSG00000199949 | 5.13E-15 | -2.63127 | 1 | 1 Y_RNA       | -- |
| ENSG00000199953 | 5.13E-15 | -2.63127 | 1 | 1 RNA5SP443   | -- |
| ENSG00000199959 | 5.13E-15 | -2.63127 | 1 | 1 SNORA2      | -- |
| ENSG00000199960 | 5.13E-15 | -2.63127 | 1 | 1 SNORD115-14 | -- |
| ENSG00000199962 | 5.13E-15 | -2.63127 | 1 | 1 Y_RNA       | -- |
| ENSG00000199963 | 5.13E-15 | -2.63127 | 1 | 1 RNU6-605P   | -- |
| ENSG00000199964 | 5.13E-15 | -2.63127 | 1 | 1 Y_RNA       | -- |
| ENSG00000199968 | 5.13E-15 | -2.63127 | 1 | 1 SNORD115-19 | -- |
| ENSG00000199970 | 5.13E-15 | -2.63127 | 1 | 1 SNORD115-3  | -- |
| ENSG00000199971 | 5.13E-15 | -2.63127 | 1 | 1 RNU6-797P   | -- |
| ENSG00000199975 | 5.13E-15 | -2.63127 | 1 | 1 RN7SKP243   | -- |
| ENSG00000199977 | 5.13E-15 | -2.63127 | 1 | 1 SNORA73     | -- |
| ENSG00000199979 | 5.13E-15 | -2.63127 | 1 | 1 Y_RNA       | -- |
| ENSG00000199980 | 5.13E-15 | -2.63127 | 1 | 1 Y_RNA       | -- |

|                 |          |          |   |               |    |
|-----------------|----------|----------|---|---------------|----|
| ENSG00000199985 | 5.13E-15 | -2.63127 | 1 | 1 RNA5SP264   | -- |
| ENSG00000199986 | 5.13E-15 | -2.63127 | 1 | 1 RNU6-486P   | -- |
| ENSG00000199990 | 5.13E-15 | -2.63127 | 1 | 1 VTRNA1-1    | -- |
| ENSG00000199994 | 5.13E-15 | -2.63127 | 1 | 1 RNA5SP145   | -- |
| ENSG00000200003 | 5.13E-15 | -2.63127 | 1 | 1 RNU6-986P   | -- |
| ENSG00000200008 | 5.13E-15 | -2.63127 | 1 | 1 Y_RNA       | -- |
| ENSG00000200011 | 5.13E-15 | -2.63127 | 1 | 1 Y_RNA       | -- |
| ENSG00000200013 | 5.13E-15 | -2.63127 | 1 | 1 RNU6-623P   | -- |
| ENSG00000200021 | 5.13E-15 | -2.63127 | 1 | 1 RNA5SP448   | -- |
| ENSG00000200024 | 5.13E-15 | -2.63127 | 1 | 1 Y_RNA       | -- |
| ENSG00000200026 | 5.13E-15 | -2.63127 | 1 | 1 U8          | -- |
| ENSG00000200028 | 5.13E-15 | -2.63127 | 1 | 1 RNA5SP98    | -- |
| ENSG00000200029 | 5.13E-15 | -2.63127 | 1 | 1 RNU6-642P   | -- |
| ENSG00000200034 | 5.13E-15 | -2.63127 | 1 | 1 RNU4-73P    | -- |
| ENSG00000200036 | 5.13E-15 | -2.63127 | 1 | 1 RNA5SP65    | -- |
| ENSG00000200037 | 5.13E-15 | -2.63127 | 1 | 1 RNA5SP32    | -- |
| ENSG00000200040 | 5.13E-15 | -2.63127 | 1 | 1 Y_RNA       | -- |
| ENSG00000200041 | 5.13E-15 | -2.63127 | 1 | 1 Y_RNA       | -- |
| ENSG00000200042 | 5.13E-15 | -2.63127 | 1 | 1 U3          | -- |
| ENSG00000200047 | 5.13E-15 | -2.63127 | 1 | 1 RN7SKP115   | -- |
| ENSG00000200048 | 5.13E-15 | -2.63127 | 1 | 1 RNU6-812P   | -- |
| ENSG00000200049 | 5.13E-15 | -2.63127 | 1 | 1 Y_RNA       | -- |
| ENSG00000200051 | 5.13E-15 | -2.63127 | 1 | 1 SNORD45     | -- |
| ENSG00000200052 | 5.13E-15 | -2.63127 | 1 | 1 Y_RNA       | -- |
| ENSG00000200057 | 5.13E-15 | -2.63127 | 1 | 1 RN7SKP63    | -- |
| ENSG00000200058 | 5.13E-15 | -2.63127 | 1 | 1 RNA5SP218   | -- |
| ENSG00000200060 | 5.13E-15 | -2.63127 | 1 | 1 Y_RNA       | -- |
| ENSG00000200062 | 5.13E-15 | -2.63127 | 1 | 1 RNU4-58P    | -- |
| ENSG00000200064 | 5.13E-15 | -2.63127 | 1 | 1 RNY4P9      | -- |
| ENSG00000200065 | 5.13E-15 | -2.63127 | 1 | 1 Y_RNA       | -- |
| ENSG00000200066 | 5.13E-15 | -2.63127 | 1 | 1 Y_RNA       | -- |
| ENSG00000200070 | 5.13E-15 | -2.63127 | 1 | 1 RNU4-80P    | -- |
| ENSG00000200072 | 5.13E-15 | -2.63127 | 1 | 1 SNORD44     | -- |
| ENSG00000200075 | 5.13E-15 | -2.63127 | 1 | 1 SNORA25     | -- |
| ENSG00000200079 | 5.13E-15 | -2.63127 | 1 | 1 RNA5SP326   | -- |
| ENSG00000200084 | 5.13E-15 | -2.63127 | 1 | 1 SNORD68     | -- |
| ENSG00000200085 | 5.13E-15 | -2.63127 | 1 | 1 Y_RNA       | -- |
| ENSG00000200086 | 5.13E-15 | -2.63127 | 1 | 1 RNU6-433P   | -- |
| ENSG00000200089 | 5.13E-15 | -2.63127 | 1 | 1 SNORD114-31 | -- |
| ENSG00000200091 | 5.13E-15 | -2.63127 | 1 | 1 RN7SKP163   | -- |
| ENSG00000200095 | 5.13E-15 | -2.63127 | 1 | 1 RNU6-181P   | -- |
| ENSG00000200097 | 5.13E-15 | -2.63127 | 1 | 1 RNU6-1167P  | -- |
| ENSG00000200101 | 5.13E-15 | -2.63127 | 1 | 1 RNU6-508P   | -- |
| ENSG00000200102 | 5.13E-15 | -2.63127 | 1 | 1 RNU6-252P   | -- |
| ENSG00000200105 | 5.13E-15 | -2.63127 | 1 | 1 RNU6-251P   | -- |
| ENSG00000200106 | 5.13E-15 | -2.63127 | 1 | 1 RNU6-984P   | -- |
| ENSG00000200107 | 5.13E-15 | -2.63127 | 1 | 1 RNU6-1249P  | -- |
| ENSG00000200108 | 5.13E-15 | -2.63127 | 1 | 1 RNU6-774P   | -- |
| ENSG00000200112 | 5.13E-15 | -2.63127 | 1 | 1 SNORD56     | -- |
| ENSG00000200113 | 5.13E-15 | -2.63127 | 1 | 1 SNORA51     | -- |
| ENSG00000200114 | 5.13E-15 | -2.63127 | 1 | 1 RNA5SP123   | -- |
| ENSG00000200118 | 5.13E-15 | -2.63127 | 1 | 1 Y_RNA       | -- |
| ENSG00000200121 | 5.13E-15 | -2.63127 | 1 | 1 Y_RNA       | -- |
| ENSG00000200130 | 5.13E-15 | -2.63127 | 1 | 1 SNORA63     | -- |
| ENSG00000200131 | 5.13E-15 | -2.63127 | 1 | 1 RN7SKP77    | -- |
| ENSG00000200132 | 5.13E-15 | -2.63127 | 1 | 1 RNU6-1021P  | -- |
| ENSG00000200138 | 5.13E-15 | -2.63127 | 1 | 1 Y_RNA       | -- |
| ENSG00000200139 | 5.13E-15 | -2.63127 | 1 | 1 RNU6-778P   | -- |

|                 |          |          |   |               |    |
|-----------------|----------|----------|---|---------------|----|
| ENSG00000200141 | 5.13E-15 | -2.63127 | 1 | 1 Y_RNA       | -- |
| ENSG00000200146 | 5.13E-15 | -2.63127 | 1 | 1 RNU6-544P   | -- |
| ENSG00000200150 | 5.13E-15 | -2.63127 | 1 | 1 SNORD113    | -- |
| ENSG00000200151 | 5.13E-15 | -2.63127 | 1 | 1 RN7SKP231   | -- |
| ENSG00000200152 | 5.13E-15 | -2.63127 | 1 | 1 RNU6-216P   | -- |
| ENSG00000200153 | 5.13E-15 | -2.63127 | 1 | 1 RNU6-23P    | -- |
| ENSG00000200156 | 5.13E-15 | -2.63127 | 1 | 1 RNU5B-1     | -- |
| ENSG00000200161 | 5.13E-15 | -2.63127 | 1 | 1 RN7SKP145   | -- |
| ENSG00000200162 | 5.13E-15 | -2.63127 | 1 | 1 Y_RNA       | -- |
| ENSG00000200163 | 5.13E-15 | -2.63127 | 1 | 1 SNORD115-18 | -- |
| ENSG00000200164 | 5.13E-15 | -2.63127 | 1 | 1 Y_RNA       | -- |
| ENSG00000200168 | 5.13E-15 | -2.63127 | 1 | 1 RNA5SP350   | -- |
| ENSG00000200171 | 5.13E-15 | -2.63127 | 1 | 1 Y_RNA       | -- |
| ENSG00000200174 | 5.13E-15 | -2.63127 | 1 | 1 Y_RNA       | -- |
| ENSG00000200175 | 5.13E-15 | -2.63127 | 1 | 1 RNU6-1309P  | -- |
| ENSG00000200176 | 5.13E-15 | -2.63127 | 1 | 1 RNU1-19P    | -- |
| ENSG00000200179 | 5.13E-15 | -2.63127 | 1 | 1 Y_RNA       | -- |
| ENSG00000200183 | 5.13E-15 | -2.63127 | 1 | 1 RNU6-238P   | -- |
| ENSG00000200184 | 5.13E-15 | -2.63127 | 1 | 1 RNU1-20P    | -- |
| ENSG00000200189 | 5.13E-15 | -2.63127 | 1 | 1 RNU6-832P   | -- |
| ENSG00000200191 | 5.13E-15 | -2.63127 | 1 | 1 U8          | -- |
| ENSG00000200197 | 5.13E-15 | -2.63127 | 1 | 1 RNU1-21P    | -- |
| ENSG00000200198 | 5.13E-15 | -2.63127 | 1 | 1 RN7SKP211   | -- |
| ENSG00000200204 | 5.13E-15 | -2.63127 | 1 | 1 RNU1-22P    | -- |
| ENSG00000200206 | 5.13E-15 | -2.63127 | 1 | 1 SNORD74     | -- |
| ENSG00000200208 | 5.13E-15 | -2.63127 | 1 | 1 Y_RNA       | -- |
| ENSG00000200211 | 5.13E-15 | -2.63127 | 1 | 1 RNY4P27     | -- |
| ENSG00000200213 | 5.13E-15 | -2.63127 | 1 | 1 RNU6-992P   | -- |
| ENSG00000200215 | 5.13E-15 | -2.63127 | 1 | 1 SNORD113-6  | -- |
| ENSG00000200216 | 5.13E-15 | -2.63127 | 1 | 1 RNU6-745P   | -- |
| ENSG00000200217 | 5.13E-15 | -2.63127 | 1 | 1 RNU6-839P   | -- |
| ENSG00000200218 | 5.13E-15 | -2.63127 | 1 | 1 RNU6-697P   | -- |
| ENSG00000200220 | 5.13E-15 | -2.63127 | 1 | 1 RNU6-179P   | -- |
| ENSG00000200222 | 5.13E-15 | -2.63127 | 1 | 1 U3          | -- |
| ENSG00000200224 | 5.13E-15 | -2.63127 | 1 | 1 RNU6-626P   | -- |
| ENSG00000200225 | 5.13E-15 | -2.63127 | 1 | 1 RNA5SP382   | -- |
| ENSG00000200227 | 5.13E-15 | -2.63127 | 1 | 1 RNA5SP197   | -- |
| ENSG00000200231 | 5.13E-15 | -2.63127 | 1 | 1 RNU1-23P    | -- |
| ENSG00000200235 | 5.13E-15 | -2.63127 | 1 | 1 SNORA27     | -- |
| ENSG00000200238 | 5.13E-15 | -2.63127 | 1 | 1 RNA5SP133   | -- |
| ENSG00000200241 | 5.13E-15 | -2.63127 | 1 | 1 Y_RNA       | -- |
| ENSG00000200243 | 5.13E-15 | -2.63127 | 1 | 1 RN7SKP79    | -- |
| ENSG00000200246 | 5.13E-15 | -2.63127 | 1 | 1 RNA5SP263   | -- |
| ENSG00000200247 | 5.13E-15 | -2.63127 | 1 | 1 RNU6-254P   | -- |
| ENSG00000200248 | 5.13E-15 | -2.63127 | 1 | 1 RNA5SP214   | -- |
| ENSG00000200250 | 5.13E-15 | -2.63127 | 1 | 1 RNU6-1147P  | -- |
| ENSG00000200254 | 5.13E-15 | -2.63127 | 1 | 1 RNU6-536P   | -- |
| ENSG00000200256 | 5.13E-15 | -2.63127 | 1 | 1 Y_RNA       | -- |
| ENSG00000200257 | 5.13E-15 | -2.63127 | 1 | 1 RNU6-97P    | -- |
| ENSG00000200259 | 5.13E-15 | -2.63127 | 1 | 1 SNORD35A    | -- |
| ENSG00000200261 | 5.13E-15 | -2.63127 | 1 | 1 Y_RNA       | -- |
| ENSG00000200262 | 5.13E-15 | -2.63127 | 1 | 1 Y_RNA       | -- |
| ENSG00000200267 | 5.13E-15 | -2.63127 | 1 | 1 RNU6-66P    | -- |
| ENSG00000200269 | 5.13E-15 | -2.63127 | 1 | 1 RNU6-838P   | -- |
| ENSG00000200270 | 5.13E-15 | -2.63127 | 1 | 1 Y_RNA       | -- |
| ENSG00000200274 | 5.13E-15 | -2.63127 | 1 | 1 RNU4-32P    | -- |
| ENSG00000200275 | 5.13E-15 | -2.63127 | 1 | 1 RNA5SP199   | -- |
| ENSG00000200278 | 5.13E-15 | -2.63127 | 1 | 1 RNA5SP352   | -- |

|                 |          |          |   |               |    |
|-----------------|----------|----------|---|---------------|----|
| ENSG00000200279 | 5.13E-15 | -2.63127 | 1 | 1 SNORD114-10 | -- |
| ENSG00000200281 | 5.13E-15 | -2.63127 | 1 | 1 RNU6-624P   | -- |
| ENSG00000200283 | 5.13E-15 | -2.63127 | 1 | 1 Y_RNA       | -- |
| ENSG00000200287 | 5.13E-15 | -2.63127 | 1 | 1 Y_RNA       | -- |
| ENSG00000200288 | 5.13E-15 | -2.63127 | 1 | 1 SNORA18     | -- |
| ENSG00000200291 | 5.13E-15 | -2.63127 | 1 | 1 Y_RNA       | -- |
| ENSG00000200293 | 5.13E-15 | -2.63127 | 1 | 1 RNA5SP393   | -- |
| ENSG00000200295 | 5.13E-15 | -2.63127 | 1 | 1 RNU6-527P   | -- |
| ENSG00000200296 | 5.13E-15 | -2.63127 | 1 | 1 RNU1-83P    | -- |
| ENSG00000200298 | 5.13E-15 | -2.63127 | 1 | 1 Y_RNA       | -- |
| ENSG00000200303 | 5.13E-15 | -2.63127 | 1 | 1 RNU6-940P   | -- |
| ENSG00000200304 | 5.13E-15 | -2.63127 | 1 | 1 RNU6-1255P  | -- |
| ENSG00000200305 | 5.13E-15 | -2.63127 | 1 | 1 Y_RNA       | -- |
| ENSG00000200310 | 5.13E-15 | -2.63127 | 1 | 1 RNA5SP215   | -- |
| ENSG00000200312 | 5.13E-15 | -2.63127 | 1 | 1 RN7SKP255   | -- |
| ENSG00000200313 | 5.13E-15 | -2.63127 | 1 | 1 RNA5-8SP7   | -- |
| ENSG00000200314 | 5.13E-15 | -2.63127 | 1 | 1 Y_RNA       | -- |
| ENSG00000200318 | 5.13E-15 | -2.63127 | 1 | 1 U3          | -- |
| ENSG00000200320 | 5.13E-15 | -2.63127 | 1 | 1 SNORA63     | -- |
| ENSG00000200325 | 5.13E-15 | -2.63127 | 1 | 1 Y_RNA       | -- |
| ENSG00000200326 | 5.13E-15 | -2.63127 | 1 | 1 RNA5SP391   | -- |
| ENSG00000200327 | 5.13E-15 | -2.63127 | 1 | 1 RNA5SP62    | -- |
| ENSG00000200331 | 5.13E-15 | -2.63127 | 1 | 1 RNU6-183P   | -- |
| ENSG00000200332 | 5.13E-15 | -2.63127 | 1 | 1 Y_RNA       | -- |
| ENSG00000200334 | 5.13E-15 | -2.63127 | 1 | 1 Y_RNA       | -- |
| ENSG00000200336 | 5.13E-15 | -2.63127 | 1 | 1 RNA5SP333   | -- |
| ENSG00000200338 | 5.13E-15 | -2.63127 | 1 | 1 RNU1-49P    | -- |
| ENSG00000200340 | 5.13E-15 | -2.63127 | 1 | 1 RNU1-105P   | -- |
| ENSG00000200343 | 5.13E-15 | -2.63127 | 1 | 1 RNA5S8      | -- |
| ENSG00000200345 | 5.13E-15 | -2.63127 | 1 | 1 RNU6-485P   | -- |
| ENSG00000200347 | 5.13E-15 | -2.63127 | 1 | 1 RNU6-963P   | -- |
| ENSG00000200350 | 5.13E-15 | -2.63127 | 1 | 1 RNU6-1285P  | -- |
| ENSG00000200351 | 5.13E-15 | -2.63127 | 1 | 1 Y_RNA       | -- |
| ENSG00000200355 | 5.13E-15 | -2.63127 | 1 | 1 SNORA72     | -- |
| ENSG00000200356 | 5.13E-15 | -2.63127 | 1 | 1 RNU6-833P   | -- |
| ENSG00000200360 | 5.13E-15 | -2.63127 | 1 | 1 RNU6-792P   | -- |
| ENSG00000200361 | 5.13E-15 | -2.63127 | 1 | 1 Y_RNA       | -- |
| ENSG00000200366 | 5.13E-15 | -2.63127 | 1 | 1 RNU6-511P   | -- |
| ENSG00000200367 | 5.13E-15 | -2.63127 | 1 | 1 SNORD113-8  | -- |
| ENSG00000200369 | 5.13E-15 | -2.63127 | 1 | 1 RNU6-666P   | -- |
| ENSG00000200370 | 5.13E-15 | -2.63127 | 1 | 1 RNA5S17     | -- |
| ENSG00000200372 | 5.13E-15 | -2.63127 | 1 | 1 RNU5E-8P    | -- |
| ENSG00000200377 | 5.13E-15 | -2.63127 | 1 | 1 SNORD56     | -- |
| ENSG00000200378 | 5.13E-15 | -2.63127 | 1 | 1 RNU5B-4P    | -- |
| ENSG00000200379 | 5.13E-15 | -2.63127 | 1 | 1 RN7SKP45    | -- |
| ENSG00000200381 | 5.13E-15 | -2.63127 | 1 | 1 RNA5S4      | -- |
| ENSG00000200385 | 5.13E-15 | -2.63127 | 1 | 1 SNORA42     | -- |
| ENSG00000200388 | 5.13E-15 | -2.63127 | 1 | 1 RNU6-618P   | -- |
| ENSG00000200389 | 5.13E-15 | -2.63127 | 1 | 1 RNU6-509P   | -- |
| ENSG00000200390 | 5.13E-15 | -2.63127 | 1 | 1 Y_RNA       | -- |
| ENSG00000200391 | 5.13E-15 | -2.63127 | 1 | 1 Y_RNA       | -- |
| ENSG00000200393 | 5.13E-15 | -2.63127 | 1 | 1 RNU6-698P   | -- |
| ENSG00000200398 | 5.13E-15 | -2.63127 | 1 | 1 SNORD115-24 | -- |
| ENSG00000200406 | 5.13E-15 | -2.63127 | 1 | 1 SNORD114-23 | -- |
| ENSG00000200407 | 5.13E-15 | -2.63127 | 1 | 1 RNU6-1169P  | -- |
| ENSG00000200408 | 5.13E-15 | -2.63127 | 1 | 1 RNA5SP74    | -- |
| ENSG00000200411 | 5.13E-15 | -2.63127 | 1 | 1 RNA5SP346   | -- |
| ENSG00000200413 | 5.13E-15 | -2.63127 | 1 | 1 SNORD114-26 | -- |

|                 |          |          |   |               |    |
|-----------------|----------|----------|---|---------------|----|
| ENSG00000200418 | 5.13E-15 | -2.63127 | 1 | 1 SNORA63     | -- |
| ENSG00000200421 | 5.13E-15 | -2.63127 | 1 | 1 Y_RNA       | -- |
| ENSG00000200422 | 5.13E-15 | -2.63127 | 1 | 1 SNORD45     | -- |
| ENSG00000200424 | 5.13E-15 | -2.63127 | 1 | 1 RNU6-1155P  | -- |
| ENSG00000200427 | 5.13E-15 | -2.63127 | 1 | 1 Y_RNA       | -- |
| ENSG00000200428 | 5.13E-15 | -2.63127 | 1 | 1 Y_RNA       | -- |
| ENSG00000200431 | 5.13E-15 | -2.63127 | 1 | 1 RNU4-81P    | -- |
| ENSG00000200432 | 5.13E-15 | -2.63127 | 1 | 1 Y_RNA       | -- |
| ENSG00000200434 | 5.13E-15 | -2.63127 | 1 | 1 RNA5-8SP2   | -- |
| ENSG00000200436 | 5.13E-15 | -2.63127 | 1 | 1 Y_RNA       | -- |
| ENSG00000200443 | 5.13E-15 | -2.63127 | 1 | 1 RNU6-1066P  | -- |
| ENSG00000200444 | 5.13E-15 | -2.63127 | 1 | 1 RNU6-1339P  | -- |
| ENSG00000200446 | 5.13E-15 | -2.63127 | 1 | 1 RNU6-1085P  | -- |
| ENSG00000200448 | 5.13E-15 | -2.63127 | 1 | 1 Y_RNA       | -- |
| ENSG00000200455 | 5.13E-15 | -2.63127 | 1 | 1 RNU6-1112P  | -- |
| ENSG00000200456 | 5.13E-15 | -2.63127 | 1 | 1 RNU6-1097P  | -- |
| ENSG00000200462 | 5.13E-15 | -2.63127 | 1 | 1 RNU6-727P   | -- |
| ENSG00000200463 | 5.13E-15 | -2.63127 | 1 | 1 SNORD118    | -- |
| ENSG00000200468 | 5.13E-15 | -2.63127 | 1 | 1 RNA5SP403   | -- |
| ENSG00000200469 | 5.13E-15 | -2.63127 | 1 | 1 RNU6-112P   | -- |
| ENSG00000200471 | 5.13E-15 | -2.63127 | 1 | 1 RNU6-1125P  | -- |
| ENSG00000200472 | 5.13E-15 | -2.63127 | 1 | 1 RN7SKP44    | -- |
| ENSG00000200473 | 5.13E-15 | -2.63127 | 1 | 1 RNA5SP507   | -- |
| ENSG00000200475 | 5.13E-15 | -2.63127 | 1 | 1 RN7SKP162   | -- |
| ENSG00000200478 | 5.13E-15 | -2.63127 | 1 | 1 SNORD115-41 | -- |
| ENSG00000200480 | 5.13E-15 | -2.63127 | 1 | 1 SNORD114-28 | -- |
| ENSG00000200483 | 5.13E-15 | -2.63127 | 1 | 1 RNU6-1017P  | -- |
| ENSG00000200484 | 5.13E-15 | -2.63127 | 1 | 1 RNU6-1244P  | -- |
| ENSG00000200485 | 5.13E-15 | -2.63127 | 1 | 1 Y_RNA       | -- |
| ENSG00000200486 | 5.13E-15 | -2.63127 | 1 | 1 SNORD115-11 | -- |
| ENSG00000200487 | 5.13E-15 | -2.63127 | 1 | 1 RNA5SP322   | -- |
| ENSG00000200492 | 5.13E-15 | -2.63127 | 1 | 1 U3          | -- |
| ENSG00000200494 | 5.13E-15 | -2.63127 | 1 | 1 Y_RNA       | -- |
| ENSG00000200495 | 5.13E-15 | -2.63127 | 1 | 1 RNU6-1205P  | -- |
| ENSG00000200496 | 5.13E-15 | -2.63127 | 1 | 1 U8          | -- |
| ENSG00000200503 | 5.13E-15 | -2.63127 | 1 | 1 SNORD115-5  | -- |
| ENSG00000200506 | 5.13E-15 | -2.63127 | 1 | 1 Y_RNA       | -- |
| ENSG00000200508 | 5.13E-15 | -2.63127 | 1 | 1 Y_RNA       | -- |
| ENSG00000200510 | 5.13E-15 | -2.63127 | 1 | 1 RNY4P2      | -- |
| ENSG00000200516 | 5.13E-15 | -2.63127 | 1 | 1 RNA5SP378   | -- |
| ENSG00000200520 | 5.13E-15 | -2.63127 | 1 | 1 RNU6-1214P  | -- |
| ENSG00000200521 | 5.13E-15 | -2.63127 | 1 | 1 Y_RNA       | -- |
| ENSG00000200522 | 5.13E-15 | -2.63127 | 1 | 1 RNU6-957P   | -- |
| ENSG00000200526 | 5.13E-15 | -2.63127 | 1 | 1 RNY4P14     | -- |
| ENSG00000200527 | 5.13E-15 | -2.63127 | 1 | 1 RNA5SP457   | -- |
| ENSG00000200528 | 5.13E-15 | -2.63127 | 1 | 1 RNU6-1331P  | -- |
| ENSG00000200530 | 5.13E-15 | -2.63127 | 1 | 1 SNORD35B    | -- |
| ENSG00000200536 | 5.13E-15 | -2.63127 | 1 | 1 SNORA25     | -- |
| ENSG00000200537 | 5.13E-15 | -2.63127 | 1 | 1 RNY4P6      | -- |
| ENSG00000200538 | 5.13E-15 | -2.63127 | 1 | 1 U3          | -- |
| ENSG00000200544 | 5.13E-15 | -2.63127 | 1 | 1 Y_RNA       | -- |
| ENSG00000200545 | 5.13E-15 | -2.63127 | 1 | 1 U3          | -- |
| ENSG00000200547 | 5.13E-15 | -2.63127 | 1 | 1 Y_RNA       | -- |
| ENSG00000200552 | 5.13E-15 | -2.63127 | 1 | 1 Y_RNA       | -- |
| ENSG00000200553 | 5.13E-15 | -2.63127 | 1 | 1 Y_RNA       | -- |
| ENSG00000200554 | 5.13E-15 | -2.63127 | 1 | 1 RNU6-1020P  | -- |
| ENSG00000200555 | 5.13E-15 | -2.63127 | 1 | 1 RNU6-525P   | -- |
| ENSG00000200556 | 5.13E-15 | -2.63127 | 1 | 1 RNU6-103P   | -- |

|                 |          |          |   |               |    |
|-----------------|----------|----------|---|---------------|----|
| ENSG00000200558 | 5.13E-15 | -2.63127 | 1 | 1 RNA5SP429   | -- |
| ENSG00000200560 | 5.13E-15 | -2.63127 | 1 | 1 RNU6-288P   | -- |
| ENSG00000200563 | 5.13E-15 | -2.63127 | 1 | 1 RNU6-640P   | -- |
| ENSG00000200564 | 5.13E-15 | -2.63127 | 1 | 1 SNORD115-39 | -- |
| ENSG00000200566 | 5.13E-15 | -2.63127 | 1 | 1 RNU5F-7P    | -- |
| ENSG00000200570 | 5.13E-15 | -2.63127 | 1 | 1 RNU6-829P   | -- |
| ENSG00000200571 | 5.13E-15 | -2.63127 | 1 | 1 RNU6-1284P  | -- |
| ENSG00000200572 | 5.13E-15 | -2.63127 | 1 | 1 Y_RNA       | -- |
| ENSG00000200575 | 5.13E-15 | -2.63127 | 1 | 1 RNU6-414P   | -- |
| ENSG00000200587 | 5.13E-15 | -2.63127 | 1 | 1 RNA5SP514   | -- |
| ENSG00000200591 | 5.13E-15 | -2.63127 | 1 | 1 Y_RNA       | -- |
| ENSG00000200593 | 5.13E-15 | -2.63127 | 1 | 1 SNORD115-33 | -- |
| ENSG00000200594 | 5.13E-15 | -2.63127 | 1 | 1 RNU6-824P   | -- |
| ENSG00000200597 | 5.13E-15 | -2.63127 | 1 | 1 RNU1-87P    | -- |
| ENSG00000200600 | 5.13E-15 | -2.63127 | 1 | 1 Y_RNA       | -- |
| ENSG00000200601 | 5.13E-15 | -2.63127 | 1 | 1 RNA5SP50    | -- |
| ENSG00000200605 | 5.13E-15 | -2.63127 | 1 | 1 Y_RNA       | -- |
| ENSG00000200606 | 5.13E-15 | -2.63127 | 1 | 1 Y_RNA       | -- |
| ENSG00000200608 | 5.13E-15 | -2.63127 | 1 | 1 SNORD114-11 | -- |
| ENSG00000200610 | 5.13E-15 | -2.63127 | 1 | 1 Y_RNA       | -- |
| ENSG00000200612 | 5.13E-15 | -2.63127 | 1 | 1 SNORD114-25 | -- |
| ENSG00000200613 | 5.13E-15 | -2.63127 | 1 | 1 RNA5SP349   | -- |
| ENSG00000200615 | 5.13E-15 | -2.63127 | 1 | 1 Y_RNA       | -- |
| ENSG00000200616 | 5.13E-15 | -2.63127 | 1 | 1 Y_RNA       | -- |
| ENSG00000200619 | 5.13E-15 | -2.63127 | 1 | 1 RNA5SP447   | -- |
| ENSG00000200620 | 5.13E-15 | -2.63127 | 1 | 1 SNORA7      | -- |
| ENSG00000200622 | 5.13E-15 | -2.63127 | 1 | 1 RNU6-1059P  | -- |
| ENSG00000200623 | 5.13E-15 | -2.63127 | 1 | 1 SNORD18A    | -- |
| ENSG00000200624 | 5.13E-15 | -2.63127 | 1 | 1 RNA5S6      | -- |
| ENSG00000200626 | 5.13E-15 | -2.63127 | 1 | 1 RNA5SP325   | -- |
| ENSG00000200629 | 5.13E-15 | -2.63127 | 1 | 1 Y_RNA       | -- |
| ENSG00000200630 | 5.13E-15 | -2.63127 | 1 | 1 Y_RNA       | -- |
| ENSG00000200632 | 5.13E-15 | -2.63127 | 1 | 1 SNORD113-7  | -- |
| ENSG00000200635 | 5.13E-15 | -2.63127 | 1 | 1 Y_RNA       | -- |
| ENSG00000200636 | 5.13E-15 | -2.63127 | 1 | 1 SNORD114-27 | -- |
| ENSG00000200637 | 5.13E-15 | -2.63127 | 1 | 1 RNU5F-3P    | -- |
| ENSG00000200638 | 5.13E-15 | -2.63127 | 1 | 1 SNORD115-37 | -- |
| ENSG00000200645 | 5.13E-15 | -2.63127 | 1 | 1 RNU6-1210P  | -- |
| ENSG00000200646 | 5.13E-15 | -2.63127 | 1 | 1 Y_RNA       | -- |
| ENSG00000200648 | 5.13E-15 | -2.63127 | 1 | 1 RNU6-226P   | -- |
| ENSG00000200649 | 5.13E-15 | -2.63127 | 1 | 1 RNA5SP343   | -- |
| ENSG00000200650 | 5.13E-15 | -2.63127 | 1 | 1 RNA5SP114   | -- |
| ENSG00000200651 | 5.13E-15 | -2.63127 | 1 | 1 Y_RNA       | -- |
| ENSG00000200653 | 5.13E-15 | -2.63127 | 1 | 1 RNU4-92P    | -- |
| ENSG00000200656 | 5.13E-15 | -2.63127 | 1 | 1 SNORA5B     | -- |
| ENSG00000200658 | 5.13E-15 | -2.63127 | 1 | 1 Y_RNA       | -- |
| ENSG00000200661 | 5.13E-15 | -2.63127 | 1 | 1 SNORD116-10 | -- |
| ENSG00000200662 | 5.13E-15 | -2.63127 | 1 | 1 Y_RNA       | -- |
| ENSG00000200664 | 5.13E-15 | -2.63127 | 1 | 1 Y_RNA       | -- |
| ENSG00000200665 | 5.13E-15 | -2.63127 | 1 | 1 RNU6-1188P  | -- |
| ENSG00000200670 | 5.13E-15 | -2.63127 | 1 | 1 RNU6-912P   | -- |
| ENSG00000200673 | 5.13E-15 | -2.63127 | 1 | 1 RN7SKP174   | -- |
| ENSG00000200680 | 5.13E-15 | -2.63127 | 1 | 1 SNORD115-4  | -- |
| ENSG00000200681 | 5.13E-15 | -2.63127 | 1 | 1 RNU6-263P   | -- |
| ENSG00000200683 | 5.13E-15 | -2.63127 | 1 | 1 RNU6-379P   | -- |
| ENSG00000200685 | 5.13E-15 | -2.63127 | 1 | 1 Y_RNA       | -- |
| ENSG00000200686 | 5.13E-15 | -2.63127 | 1 | 1 RNY3P3      | -- |
| ENSG00000200687 | 5.13E-15 | -2.63127 | 1 | 1 RNA5SP335   | -- |



|                 |          |          |   |               |    |
|-----------------|----------|----------|---|---------------|----|
| ENSG00000200688 | 5.13E-15 | -2.63127 | 1 | 1 Y_RNA       | -- |
| ENSG00000200701 | 5.13E-15 | -2.63127 | 1 | 1 RNU6-674P   | -- |
| ENSG00000200702 | 5.13E-15 | -2.63127 | 1 | 1 Y_RNA       | -- |
| ENSG00000200703 | 5.13E-15 | -2.63127 | 1 | 1 RNU6-873P   | -- |
| ENSG00000200706 | 5.13E-15 | -2.63127 | 1 | 1 SNORD45     | -- |
| ENSG00000200708 | 5.13E-15 | -2.63127 | 1 | 1 RN7SKP93    | -- |
| ENSG00000200709 | 5.13E-15 | -2.63127 | 1 | 1 RNA5SP27    | -- |
| ENSG00000200711 | 5.13E-15 | -2.63127 | 1 | 1 RNA5SP28    | -- |
| ENSG00000200713 | 5.13E-15 | -2.63127 | 1 | 1 RNU6-682P   | -- |
| ENSG00000200718 | 5.13E-15 | -2.63127 | 1 | 1 RN7SKP103   | -- |
| ENSG00000200719 | 5.13E-15 | -2.63127 | 1 | 1 RNA5SP260   | -- |
| ENSG00000200720 | 5.13E-15 | -2.63127 | 1 | 1 RNU6-931P   | -- |
| ENSG00000200726 | 5.13E-15 | -2.63127 | 1 | 1 SNORD115-8  | -- |
| ENSG00000200728 | 5.13E-15 | -2.63127 | 1 | 1 RNU6-271P   | -- |
| ENSG00000200731 | 5.13E-15 | -2.63127 | 1 | 1 RNU1-124P   | -- |
| ENSG00000200732 | 5.13E-15 | -2.63127 | 1 | 1 RNU6-194P   | -- |
| ENSG00000200733 | 5.13E-15 | -2.63127 | 1 | 1 SNORD38     | -- |
| ENSG00000200735 | 5.13E-15 | -2.63127 | 1 | 1 RNY4P8      | -- |
| ENSG00000200737 | 5.13E-15 | -2.63127 | 1 | 1 Y_RNA       | -- |
| ENSG00000200738 | 5.13E-15 | -2.63127 | 1 | 1 RNA5SP472   | -- |
| ENSG00000200741 | 5.13E-15 | -2.63127 | 1 | 1 RNA5SP161   | -- |
| ENSG00000200742 | 5.13E-15 | -2.63127 | 1 | 1 Y_RNA       | -- |
| ENSG00000200745 | 5.13E-15 | -2.63127 | 1 | 1 RNU1-31P    | -- |
| ENSG00000200750 | 5.13E-15 | -2.63127 | 1 | 1 Y_RNA       | -- |
| ENSG00000200752 | 5.13E-15 | -2.63127 | 1 | 1 Y_RNA       | -- |
| ENSG00000200753 | 5.13E-15 | -2.63127 | 1 | 1 SNORD56     | -- |
| ENSG00000200755 | 5.13E-15 | -2.63127 | 1 | 1 RNA5SP68    | -- |
| ENSG00000200756 | 5.13E-15 | -2.63127 | 1 | 1 RNU6-236P   | -- |
| ENSG00000200757 | 5.13E-15 | -2.63127 | 1 | 1 SNORD115-16 | -- |
| ENSG00000200761 | 5.13E-15 | -2.63127 | 1 | 1 RN7SKP113   | -- |
| ENSG00000200763 | 5.13E-15 | -2.63127 | 1 | 1 RNU6-961P   | -- |
| ENSG00000200764 | 5.13E-15 | -2.63127 | 1 | 1 Y_RNA       | -- |
| ENSG00000200774 | 5.13E-15 | -2.63127 | 1 | 1 RNU6-478P   | -- |
| ENSG00000200779 | 5.13E-15 | -2.63127 | 1 | 1 RNU6-105P   | -- |
| ENSG00000200783 | 5.13E-15 | -2.63127 | 1 | 1 RN7SKP180   | -- |
| ENSG00000200786 | 5.13E-15 | -2.63127 | 1 | 1 RNA5SP234   | -- |
| ENSG00000200789 | 5.13E-15 | -2.63127 | 1 | 1 RNU1-65P    | -- |
| ENSG00000200790 | 5.13E-15 | -2.63127 | 1 | 1 RNU6-631P   | -- |
| ENSG00000200792 | 5.13E-15 | -2.63127 | 1 | 1 SNORA80     | -- |
| ENSG00000200794 | 5.13E-15 | -2.63127 | 1 | 1 RN7SKP250   | -- |
| ENSG00000200795 | 5.13E-15 | -2.63127 | 1 | 1 RNU4-1      | -- |
| ENSG00000200796 | 5.13E-15 | -2.63127 | 1 | 1 RNU6-753P   | -- |
| ENSG00000200799 | 5.13E-15 | -2.63127 | 1 | 1 RNU6-770P   | -- |
| ENSG00000200800 | 5.13E-15 | -2.63127 | 1 | 1 RNU1-130P   | -- |
| ENSG00000200801 | 5.13E-15 | -2.63127 | 1 | 1 SNORD115-28 | -- |
| ENSG00000200806 | 5.13E-15 | -2.63127 | 1 | 1 RNA5SP275   | -- |
| ENSG00000200807 | 5.13E-15 | -2.63127 | 1 | 1 RNU1-32P    | -- |
| ENSG00000200812 | 5.13E-15 | -2.63127 | 1 | 1 SNORD115-6  | -- |
| ENSG00000200814 | 5.13E-15 | -2.63127 | 1 | 1 RNU6-595P   | -- |
| ENSG00000200816 | 5.13E-15 | -2.63127 | 1 | 1 SNORA38     | -- |
| ENSG00000200817 | 5.13E-15 | -2.63127 | 1 | 1 RNU6-899P   | -- |
| ENSG00000200818 | 5.13E-15 | -2.63127 | 1 | 1 RNU6-1204P  | -- |
| ENSG00000200822 | 5.13E-15 | -2.63127 | 1 | 1 Y_RNA       | -- |
| ENSG00000200823 | 5.13E-15 | -2.63127 | 1 | 1 SNORD114-2  | -- |
| ENSG00000200827 | 5.13E-15 | -2.63127 | 1 | 1 RNU6-324P   | -- |
| ENSG00000200829 | 5.13E-15 | -2.63127 | 1 | 1 Y_RNA       | -- |
| ENSG00000200830 | 5.13E-15 | -2.63127 | 1 | 1 RN7SKP134   | -- |
| ENSG00000200831 | 5.13E-15 | -2.63127 | 1 | 1 SNORD36B    | -- |

|                 |          |          |   |               |    |
|-----------------|----------|----------|---|---------------|----|
| ENSG00000200832 | 5.13E-15 | -2.63127 | 1 | 1 SNORD114-4  | -- |
| ENSG00000200833 | 5.13E-15 | -2.63127 | 1 | 1 Y_RNA       | -- |
| ENSG00000200839 | 5.13E-15 | -2.63127 | 1 | 1 RNA5SP48    | -- |
| ENSG00000200840 | 5.13E-15 | -2.63127 | 1 | 1 RNU6-82P    | -- |
| ENSG00000200843 | 5.13E-15 | -2.63127 | 1 | 1 RNY4P4      | -- |
| ENSG00000200849 | 5.13E-15 | -2.63127 | 1 | 1 Y_RNA       | -- |
| ENSG00000200852 | 5.13E-15 | -2.63127 | 1 | 1 RNA5SP499   | -- |
| ENSG00000200855 | 5.13E-15 | -2.63127 | 1 | 1 Y_RNA       | -- |
| ENSG00000200857 | 5.13E-15 | -2.63127 | 1 | 1 Y_RNA       | -- |
| ENSG00000200860 | 5.13E-15 | -2.63127 | 1 | 1 Y_RNA       | -- |
| ENSG00000200867 | 5.13E-15 | -2.63127 | 1 | 1 RN7SKP36    | -- |
| ENSG00000200869 | 5.13E-15 | -2.63127 | 1 | 1 RNU6-457P   | -- |
| ENSG00000200871 | 5.13E-15 | -2.63127 | 1 | 1 RNU6-810P   | -- |
| ENSG00000200872 | 5.13E-15 | -2.63127 | 1 | 1 RNA5SP456   | -- |
| ENSG00000200873 | 5.13E-15 | -2.63127 | 1 | 1 RNA5SP399   | -- |
| ENSG00000200874 | 5.13E-15 | -2.63127 | 1 | 1 Y_RNA       | -- |
| ENSG00000200875 | 5.13E-15 | -2.63127 | 1 | 1 RNU6-340P   | -- |
| ENSG00000200877 | 5.13E-15 | -2.63127 | 1 | 1 RNU6-560P   | -- |
| ENSG00000200882 | 5.13E-15 | -2.63127 | 1 | 1 RNU6-681P   | -- |
| ENSG00000200883 | 5.13E-15 | -2.63127 | 1 | 1 Y_RNA       | -- |
| ENSG00000200884 | 5.13E-15 | -2.63127 | 1 | 1 Y_RNA       | -- |
| ENSG00000200885 | 5.13E-15 | -2.63127 | 1 | 1 RNU1-146P   | -- |
| ENSG00000200887 | 5.13E-15 | -2.63127 | 1 | 1 RNU6-598P   | -- |
| ENSG00000200889 | 5.13E-15 | -2.63127 | 1 | 1 RNU4-13P    | -- |
| ENSG00000200890 | 5.13E-15 | -2.63127 | 1 | 1 RNA5SP99    | -- |
| ENSG00000200891 | 5.13E-15 | -2.63127 | 1 | 1 SNORD74     | -- |
| ENSG00000200893 | 5.13E-15 | -2.63127 | 1 | 1 RNU6-944P   | -- |
| ENSG00000200895 | 5.13E-15 | -2.63127 | 1 | 1 RN7SKP245   | -- |
| ENSG00000200897 | 5.13E-15 | -2.63127 | 1 | 1 SNORD74     | -- |
| ENSG00000200898 | 5.13E-15 | -2.63127 | 1 | 1 RNU6-1243P  | -- |
| ENSG00000200902 | 5.13E-15 | -2.63127 | 1 | 1 RNU6-627P   | -- |
| ENSG00000200903 | 5.13E-15 | -2.63127 | 1 | 1 RNU1-42P    | -- |
| ENSG00000200906 | 5.13E-15 | -2.63127 | 1 | 1 RNU6-854P   | -- |
| ENSG00000200917 | 5.13E-15 | -2.63127 | 1 | 1 RNU6-553P   | -- |
| ENSG00000200926 | 5.13E-15 | -2.63127 | 1 | 1 RNU6-960P   | -- |
| ENSG00000200935 | 5.13E-15 | -2.63127 | 1 | 1 RNU6-1090P  | -- |
| ENSG00000200941 | 5.13E-15 | -2.63127 | 1 | 1 RNU6-694P   | -- |
| ENSG00000200942 | 5.13E-15 | -2.63127 | 1 | 1 RNU6-501P   | -- |
| ENSG00000200949 | 5.13E-15 | -2.63127 | 1 | 1 SNORD115-32 | -- |
| ENSG00000200953 | 5.13E-15 | -2.63127 | 1 | 1 Y_RNA       | -- |
| ENSG00000200957 | 5.13E-15 | -2.63127 | 1 | 1 RNU6-801P   | -- |
| ENSG00000200963 | 5.13E-15 | -2.63127 | 1 | 1 RNU6-289P   | -- |
| ENSG00000200966 | 5.13E-15 | -2.63127 | 1 | 1 RN7SKP87    | -- |
| ENSG00000200969 | 5.13E-15 | -2.63127 | 1 | 1 SNORD95     | -- |
| ENSG00000200974 | 5.13E-15 | -2.63127 | 1 | 1 RNU4-87P    | -- |
| ENSG00000200975 | 5.13E-15 | -2.63127 | 1 | 1 RNU1-7P     | -- |
| ENSG00000200976 | 5.13E-15 | -2.63127 | 1 | 1 Y_RNA       | -- |
| ENSG00000200980 | 5.13E-15 | -2.63127 | 1 | 1 Y_RNA       | -- |
| ENSG00000200982 | 5.13E-15 | -2.63127 | 1 | 1 Y_RNA       | -- |
| ENSG00000200983 | 5.13E-15 | -2.63127 | 1 | 1 SNORA3      | -- |
| ENSG00000200986 | 5.13E-15 | -2.63127 | 1 | 1 RNU6-819P   | -- |
| ENSG00000200987 | 5.13E-15 | -2.63127 | 1 | 1 SNORD115-30 | -- |
| ENSG00000200991 | 5.13E-15 | -2.63127 | 1 | 1 SNORA25     | -- |
| ENSG00000200998 | 5.13E-15 | -2.63127 | 1 | 1 Y_RNA       | -- |
| ENSG00000200999 | 5.13E-15 | -2.63127 | 1 | 1 SNORD74     | -- |
| ENSG00000201000 | 5.13E-15 | -2.63127 | 1 | 1 RNA5SP516   | -- |
| ENSG00000201001 | 5.13E-15 | -2.63127 | 1 | 1 RNU6-270P   | -- |
| ENSG00000201006 | 5.13E-15 | -2.63127 | 1 | 1 Y_RNA       | -- |

|                 |          |          |   |               |    |
|-----------------|----------|----------|---|---------------|----|
| ENSG00000201009 | 5.13E-15 | -2.63127 | 1 | 1 SNORD46     | -- |
| ENSG00000201010 | 5.13E-15 | -2.63127 | 1 | 1 RN7SKP224   | -- |
| ENSG00000201012 | 5.13E-15 | -2.63127 | 1 | 1 Y_RNA       | -- |
| ENSG00000201013 | 5.13E-15 | -2.63127 | 1 | 1 Y_RNA       | -- |
| ENSG00000201014 | 5.13E-15 | -2.63127 | 1 | 1 RNA5SP232   | -- |
| ENSG00000201015 | 5.13E-15 | -2.63127 | 1 | 1 RNU6-280P   | -- |
| ENSG00000201016 | 5.13E-15 | -2.63127 | 1 | 1 RNU6-374P   | -- |
| ENSG00000201021 | 5.13E-15 | -2.63127 | 1 | 1 RNU6-743P   | -- |
| ENSG00000201023 | 5.13E-15 | -2.63127 | 1 | 1 Y_RNA       | -- |
| ENSG00000201026 | 5.13E-15 | -2.63127 | 1 | 1 Y_RNA       | -- |
| ENSG00000201027 | 5.13E-15 | -2.63127 | 1 | 1 RN7SKP107   | -- |
| ENSG00000201028 | 5.13E-15 | -2.63127 | 1 | 1 RNU6-151P   | -- |
| ENSG00000201031 | 5.13E-15 | -2.63127 | 1 | 1 Y_RNA       | -- |
| ENSG00000201032 | 5.13E-15 | -2.63127 | 1 | 1 RNU6-704P   | -- |
| ENSG00000201033 | 5.13E-15 | -2.63127 | 1 | 1 RNU1-96P    | -- |
| ENSG00000201034 | 5.13E-15 | -2.63127 | 1 | 1 Y_RNA       | -- |
| ENSG00000201035 | 5.13E-15 | -2.63127 | 1 | 1 RNA5SP469   | -- |
| ENSG00000201036 | 5.13E-15 | -2.63127 | 1 | 1 SNORD113    | -- |
| ENSG00000201041 | 5.13E-15 | -2.63127 | 1 | 1 RNA5SP242   | -- |
| ENSG00000201042 | 5.13E-15 | -2.63127 | 1 | 1 SNORA38     | -- |
| ENSG00000201044 | 5.13E-15 | -2.63127 | 1 | 1 RNU6-268P   | -- |
| ENSG00000201047 | 5.13E-15 | -2.63127 | 1 | 1 Y_RNA       | -- |
| ENSG00000201048 | 5.13E-15 | -2.63127 | 1 | 1 Y_RNA       | -- |
| ENSG00000201050 | 5.13E-15 | -2.63127 | 1 | 1 RNU6-668P   | -- |
| ENSG00000201059 | 5.13E-15 | -2.63127 | 1 | 1 RNA5SP336   | -- |
| ENSG00000201065 | 5.13E-15 | -2.63127 | 1 | 1 RNU6-461P   | -- |
| ENSG00000201066 | 5.13E-15 | -2.63127 | 1 | 1 RN7SKP280   | -- |
| ENSG00000201070 | 5.13E-15 | -2.63127 | 1 | 1 RNU4-84P    | -- |
| ENSG00000201074 | 5.13E-15 | -2.63127 | 1 | 1 Y_RNA       | -- |
| ENSG00000201075 | 5.13E-15 | -2.63127 | 1 | 1 Y_RNA       | -- |
| ENSG00000201078 | 5.13E-15 | -2.63127 | 1 | 1 RN7SKP214   | -- |
| ENSG00000201080 | 5.13E-15 | -2.63127 | 1 | 1 RNU6-372P   | -- |
| ENSG00000201084 | 5.13E-15 | -2.63127 | 1 | 1 Y_RNA       | -- |
| ENSG00000201085 | 5.13E-15 | -2.63127 | 1 | 1 RNU6-173P   | -- |
| ENSG00000201086 | 5.13E-15 | -2.63127 | 1 | 1 RNA5SP394   | -- |
| ENSG00000201088 | 5.13E-15 | -2.63127 | 1 | 1 Y_RNA       | -- |
| ENSG00000201095 | 5.13E-15 | -2.63127 | 1 | 1 RNU6-266P   | -- |
| ENSG00000201096 | 5.13E-15 | -2.63127 | 1 | 1 RNA5SP387   | -- |
| ENSG00000201097 | 5.13E-15 | -2.63127 | 1 | 1 RNU6-366P   | -- |
| ENSG00000201098 | 5.13E-15 | -2.63127 | 1 | 1 RNY1        | -- |
| ENSG00000201102 | 5.13E-15 | -2.63127 | 1 | 1 Y_RNA       | -- |
| ENSG00000201104 | 5.13E-15 | -2.63127 | 1 | 1 RNU6-11P    | -- |
| ENSG00000201105 | 5.13E-15 | -2.63127 | 1 | 1 RNU1-137P   | -- |
| ENSG00000201109 | 5.13E-15 | -2.63127 | 1 | 1 RNA5SP245   | -- |
| ENSG00000201114 | 5.13E-15 | -2.63127 | 1 | 1 Y_RNA       | -- |
| ENSG00000201118 | 5.13E-15 | -2.63127 | 1 | 1 Y_RNA       | -- |
| ENSG00000201119 | 5.13E-15 | -2.63127 | 1 | 1 RNU1-33P    | -- |
| ENSG00000201126 | 5.13E-15 | -2.63127 | 1 | 1 RNU6-773P   | -- |
| ENSG00000201129 | 5.13E-15 | -2.63127 | 1 | 1 SNORA58     | -- |
| ENSG00000201133 | 5.13E-15 | -2.63127 | 1 | 1 SNORA4      | -- |
| ENSG00000201134 | 5.13E-15 | -2.63127 | 1 | 1 Y_RNA       | -- |
| ENSG00000201135 | 5.13E-15 | -2.63127 | 1 | 1 RNU6-777P   | -- |
| ENSG00000201136 | 5.13E-15 | -2.63127 | 1 | 1 RNU6-353P   | -- |
| ENSG00000201138 | 5.13E-15 | -2.63127 | 1 | 1 Y_RNA       | -- |
| ENSG00000201140 | 5.13E-15 | -2.63127 | 1 | 1 RN7SKP128   | -- |
| ENSG00000201142 | 5.13E-15 | -2.63127 | 1 | 1 RNVU1-8     | -- |
| ENSG00000201143 | 5.13E-15 | -2.63127 | 1 | 1 SNORD115-42 | -- |
| ENSG00000201145 | 5.13E-15 | -2.63127 | 1 | 1 RNA5SP175   | -- |

|                 |          |          |   |               |    |
|-----------------|----------|----------|---|---------------|----|
| ENSG00000201148 | 5.13E-15 | -2.63127 | 1 | 1 RNA5SP42    | -- |
| ENSG00000201153 | 5.13E-15 | -2.63127 | 1 | 1 RNU6-371P   | -- |
| ENSG00000201155 | 5.13E-15 | -2.63127 | 1 | 1 RNU1-24P    | -- |
| ENSG00000201157 | 5.13E-15 | -2.63127 | 1 | 1 SNORA62     | -- |
| ENSG00000201160 | 5.13E-15 | -2.63127 | 1 | 1 Y_RNA       | -- |
| ENSG00000201161 | 5.13E-15 | -2.63127 | 1 | 1 RN7SKP10    | -- |
| ENSG00000201162 | 5.13E-15 | -2.63127 | 1 | 1 RNU6-454P   | -- |
| ENSG00000201164 | 5.13E-15 | -2.63127 | 1 | 1 RNU4-36P    | -- |
| ENSG00000201165 | 5.13E-15 | -2.63127 | 1 | 1 RNU6-1229P  | -- |
| ENSG00000201168 | 5.13E-15 | -2.63127 | 1 | 1 RNA5SP368   | -- |
| ENSG00000201170 | 5.13E-15 | -2.63127 | 1 | 1 RNU1-132P   | -- |
| ENSG00000201176 | 5.13E-15 | -2.63127 | 1 | 1 RNU6-853P   | -- |
| ENSG00000201178 | 5.13E-15 | -2.63127 | 1 | 1 Y_RNA       | -- |
| ENSG00000201179 | 5.13E-15 | -2.63127 | 1 | 1 RNU6-1322P  | -- |
| ENSG00000201180 | 5.13E-15 | -2.63127 | 1 | 1 RNU6-115P   | -- |
| ENSG00000201182 | 5.13E-15 | -2.63127 | 1 | 1 RNU6-670P   | -- |
| ENSG00000201183 | 5.13E-15 | -2.63127 | 1 | 1 RNVU1-12    | -- |
| ENSG00000201184 | 5.13E-15 | -2.63127 | 1 | 1 RNU4-68P    | -- |
| ENSG00000201186 | 5.13E-15 | -2.63127 | 1 | 1 RNU4-33P    | -- |
| ENSG00000201196 | 5.13E-15 | -2.63127 | 1 | 1 Y_RNA       | -- |
| ENSG00000201198 | 5.13E-15 | -2.63127 | 1 | 1 RNU6-879P   | -- |
| ENSG00000201201 | 5.13E-15 | -2.63127 | 1 | 1 RN7SKP118   | -- |
| ENSG00000201204 | 5.13E-15 | -2.63127 | 1 | 1 Y_RNA       | -- |
| ENSG00000201207 | 5.13E-15 | -2.63127 | 1 | 1 Y_RNA       | -- |
| ENSG00000201208 | 5.13E-15 | -2.63127 | 1 | 1 Y_RNA       | -- |
| ENSG00000201209 | 5.13E-15 | -2.63127 | 1 | 1 SNORD42     | -- |
| ENSG00000201210 | 5.13E-15 | -2.63127 | 1 | 1 RNA5SP139   | -- |
| ENSG00000201216 | 5.13E-15 | -2.63127 | 1 | 1 Y_RNA       | -- |
| ENSG00000201218 | 5.13E-15 | -2.63127 | 1 | 1 Y_RNA       | -- |
| ENSG00000201221 | 5.13E-15 | -2.63127 | 1 | 1 RNU4-40P    | -- |
| ENSG00000201223 | 5.13E-15 | -2.63127 | 1 | 1 RNU6-1305P  | -- |
| ENSG00000201227 | 5.13E-15 | -2.63127 | 1 | 1 RNA5-8SP3   | -- |
| ENSG00000201228 | 5.13E-15 | -2.63127 | 1 | 1 Y_RNA       | -- |
| ENSG00000201229 | 5.13E-15 | -2.63127 | 1 | 1 SNORA63     | -- |
| ENSG00000201231 | 5.13E-15 | -2.63127 | 1 | 1 RNU4-50P    | -- |
| ENSG00000201240 | 5.13E-15 | -2.63127 | 1 | 1 SNORD114-9  | -- |
| ENSG00000201241 | 5.13E-15 | -2.63127 | 1 | 1 RNU6-978P   | -- |
| ENSG00000201242 | 5.13E-15 | -2.63127 | 1 | 1 RNY1P1      | -- |
| ENSG00000201243 | 5.13E-15 | -2.63127 | 1 | 1 RNU6-654P   | -- |
| ENSG00000201245 | 5.13E-15 | -2.63127 | 1 | 1 SNORA25     | -- |
| ENSG00000201247 | 5.13E-15 | -2.63127 | 1 | 1 SNORD114-13 | -- |
| ENSG00000201253 | 5.13E-15 | -2.63127 | 1 | 1 RNU4-10P    | -- |
| ENSG00000201255 | 5.13E-15 | -2.63127 | 1 | 1 RNU6-990P   | -- |
| ENSG00000201260 | 5.13E-15 | -2.63127 | 1 | 1 RNU6-1075P  | -- |
| ENSG00000201263 | 5.13E-15 | -2.63127 | 1 | 1 SNORD114-6  | -- |
| ENSG00000201270 | 5.13E-15 | -2.63127 | 1 | 1 RNU6-755P   | -- |
| ENSG00000201271 | 5.13E-15 | -2.63127 | 1 | 1 RNU1-112P   | -- |
| ENSG00000201273 | 5.13E-15 | -2.63127 | 1 | 1 RNU6-776P   | -- |
| ENSG00000201274 | 5.13E-15 | -2.63127 | 1 | 1 RNA5SP192   | -- |
| ENSG00000201277 | 5.13E-15 | -2.63127 | 1 | 1 Y_RNA       | -- |
| ENSG00000201279 | 5.13E-15 | -2.63127 | 1 | 1 Y_RNA       | -- |
| ENSG00000201282 | 5.13E-15 | -2.63127 | 1 | 1 Y_RNA       | -- |
| ENSG00000201283 | 5.13E-15 | -2.63127 | 1 | 1 RNU6-489P   | -- |
| ENSG00000201285 | 5.13E-15 | -2.63127 | 1 | 1 5S_rRNA     | -- |
| ENSG00000201287 | 5.13E-15 | -2.63127 | 1 | 1 RN7SKP171   | -- |
| ENSG00000201288 | 5.13E-15 | -2.63127 | 1 | 1 RNU6-1047P  | -- |
| ENSG00000201289 | 5.13E-15 | -2.63127 | 1 | 1 RN7SKP76    | -- |
| ENSG00000201291 | 5.13E-15 | -2.63127 | 1 | 1 RNU1-34P    | -- |

|                 |          |          |   |               |    |
|-----------------|----------|----------|---|---------------|----|
| ENSG00000201292 | 5.13E-15 | -2.63127 | 1 | 1 RNU6-153P   | -- |
| ENSG00000201294 | 5.13E-15 | -2.63127 | 1 | 1 RNU6-1019P  | -- |
| ENSG00000201296 | 5.13E-15 | -2.63127 | 1 | 1 RNU4-41P    | -- |
| ENSG00000201297 | 5.13E-15 | -2.63127 | 1 | 1 Y_RNA       | -- |
| ENSG00000201298 | 5.13E-15 | -2.63127 | 1 | 1 RNU6-1164P  | -- |
| ENSG00000201300 | 5.13E-15 | -2.63127 | 1 | 1 SNORD115-27 | -- |
| ENSG00000201301 | 5.13E-15 | -2.63127 | 1 | 1 RNA5SP130   | -- |
| ENSG00000201308 | 5.13E-15 | -2.63127 | 1 | 1 RNU6-512P   | -- |
| ENSG00000201309 | 5.13E-15 | -2.63127 | 1 | 1 Y_RNA       | -- |
| ENSG00000201311 | 5.13E-15 | -2.63127 | 1 | 1 Y_RNA       | -- |
| ENSG00000201312 | 5.13E-15 | -2.63127 | 1 | 1 RNA5SP72    | -- |
| ENSG00000201314 | 5.13E-15 | -2.63127 | 1 | 1 Y_RNA       | -- |
| ENSG00000201315 | 5.13E-15 | -2.63127 | 1 | 1 RN7SKP227   | -- |
| ENSG00000201316 | 5.13E-15 | -2.63127 | 1 | 1 SNORA7      | -- |
| ENSG00000201317 | 5.13E-15 | -2.63127 | 1 | 1 RNU4-59P    | -- |
| ENSG00000201318 | 5.13E-15 | -2.63127 | 1 | 1 SNORD114-30 | -- |
| ENSG00000201321 | 5.13E-15 | -2.63127 | 1 | 1 RNA5S9      | -- |
| ENSG00000201324 | 5.13E-15 | -2.63127 | 1 | 1 RNU6-361P   | -- |
| ENSG00000201325 | 5.13E-15 | -2.63127 | 1 | 1 RNA5SP142   | -- |
| ENSG00000201326 | 5.13E-15 | -2.63127 | 1 | 1 SNORD115-22 | -- |
| ENSG00000201329 | 5.13E-15 | -2.63127 | 1 | 1 U3          | -- |
| ENSG00000201330 | 5.13E-15 | -2.63127 | 1 | 1 SNORD32B    | -- |
| ENSG00000201331 | 5.13E-15 | -2.63127 | 1 | 1 SNORD115-23 | -- |
| ENSG00000201339 | 5.13E-15 | -2.63127 | 1 | 1 Y_RNA       | -- |
| ENSG00000201340 | 5.13E-15 | -2.63127 | 1 | 1 Y_RNA       | -- |
| ENSG00000201341 | 5.13E-15 | -2.63127 | 1 | 1 RNU6-421P   | -- |
| ENSG00000201342 | 5.13E-15 | -2.63127 | 1 | 1 RNU4-38P    | -- |
| ENSG00000201343 | 5.13E-15 | -2.63127 | 1 | 1 Y_RNA       | -- |
| ENSG00000201346 | 5.13E-15 | -2.63127 | 1 | 1 U3          | -- |
| ENSG00000201347 | 5.13E-15 | -2.63127 | 1 | 1 RNA5SP69    | -- |
| ENSG00000201348 | 5.13E-15 | -2.63127 | 1 | 1 RNU105B     | -- |
| ENSG00000201351 | 5.13E-15 | -2.63127 | 1 | 1 Y_RNA       | -- |
| ENSG00000201354 | 5.13E-15 | -2.63127 | 1 | 1 Y_RNA       | -- |
| ENSG00000201355 | 5.13E-15 | -2.63127 | 1 | 1 RNA5S14     | -- |
| ENSG00000201356 | 5.13E-15 | -2.63127 | 1 | 1 RNA5SP500   | -- |
| ENSG00000201358 | 5.13E-15 | -2.63127 | 1 | 1 RN7SKP193   | -- |
| ENSG00000201361 | 5.13E-15 | -2.63127 | 1 | 1 RNA5SP433   | -- |
| ENSG00000201363 | 5.13E-15 | -2.63127 | 1 | 1 Y_RNA       | -- |
| ENSG00000201364 | 5.13E-15 | -2.63127 | 1 | 1 RN7SKP37    | -- |
| ENSG00000201365 | 5.13E-15 | -2.63127 | 1 | 1 Y_RNA       | -- |
| ENSG00000201367 | 5.13E-15 | -2.63127 | 1 | 1 RNU6-522P   | -- |
| ENSG00000201368 | 5.13E-15 | -2.63127 | 1 | 1 U3          | -- |
| ENSG00000201370 | 5.13E-15 | -2.63127 | 1 | 1 Y_RNA       | -- |
| ENSG00000201371 | 5.13E-15 | -2.63127 | 1 | 1 Y_RNA       | -- |
| ENSG00000201372 | 5.13E-15 | -2.63127 | 1 | 1 RNU6-1251P  | -- |
| ENSG00000201376 | 5.13E-15 | -2.63127 | 1 | 1 SNORA70     | -- |
| ENSG00000201377 | 5.13E-15 | -2.63127 | 1 | 1 RNY4P23     | -- |
| ENSG00000201378 | 5.13E-15 | -2.63127 | 1 | 1 Y_RNA       | -- |
| ENSG00000201379 | 5.13E-15 | -2.63127 | 1 | 1 RNU4-76P    | -- |
| ENSG00000201382 | 5.13E-15 | -2.63127 | 1 | 1 RNU6-558P   | -- |
| ENSG00000201384 | 5.13E-15 | -2.63127 | 1 | 1 SNORA32     | -- |
| ENSG00000201386 | 5.13E-15 | -2.63127 | 1 | 1 RNU6-1163P  | -- |
| ENSG00000201392 | 5.13E-15 | -2.63127 | 1 | 1 RNU6-1078P  | -- |
| ENSG00000201393 | 5.13E-15 | -2.63127 | 1 | 1 SNORA71     | -- |
| ENSG00000201394 | 5.13E-15 | -2.63127 | 1 | 1 RNA5SP140   | -- |
| ENSG00000201395 | 5.13E-15 | -2.63127 | 1 | 1 RN7SKP257   | -- |
| ENSG00000201398 | 5.13E-15 | -2.63127 | 1 | 1 U8          | -- |
| ENSG00000201403 | 5.13E-15 | -2.63127 | 1 | 1 SNORD14B    | -- |

|                 |          |          |   |               |    |
|-----------------|----------|----------|---|---------------|----|
| ENSG00000201405 | 5.13E-15 | -2.63127 | 1 | 1 Y_RNA       | -- |
| ENSG00000201410 | 5.13E-15 | -2.63127 | 1 | 1 snoZ40      | -- |
| ENSG00000201412 | 5.13E-15 | -2.63127 | 1 | 1 Y_RNA       | -- |
| ENSG00000201413 | 5.13E-15 | -2.63127 | 1 | 1 RNA5SP141   | -- |
| ENSG00000201415 | 5.13E-15 | -2.63127 | 1 | 1 RNA5SP204   | -- |
| ENSG00000201420 | 5.13E-15 | -2.63127 | 1 | 1 RNA5SP512   | -- |
| ENSG00000201421 | 5.13E-15 | -2.63127 | 1 | 1 Y_RNA       | -- |
| ENSG00000201423 | 5.13E-15 | -2.63127 | 1 | 1 RN7SKP246   | -- |
| ENSG00000201425 | 5.13E-15 | -2.63127 | 1 | 1 Y_RNA       | -- |
| ENSG00000201426 | 5.13E-15 | -2.63127 | 1 | 1 Y_RNA       | -- |
| ENSG00000201428 | 5.13E-15 | -2.63127 | 1 | 1 RN7SKP71    | -- |
| ENSG00000201431 | 5.13E-15 | -2.63127 | 1 | 1 RNU6-1277P  | -- |
| ENSG00000201432 | 5.13E-15 | -2.63127 | 1 | 1 Y_RNA       | -- |
| ENSG00000201433 | 5.13E-15 | -2.63127 | 1 | 1 RNU6-335P   | -- |
| ENSG00000201435 | 5.13E-15 | -2.63127 | 1 | 1 RNU4-24P    | -- |
| ENSG00000201436 | 5.13E-15 | -2.63127 | 1 | 1 RNU6-660P   | -- |
| ENSG00000201439 | 5.13E-15 | -2.63127 | 1 | 1 RNU4-67P    | -- |
| ENSG00000201440 | 5.13E-15 | -2.63127 | 1 | 1 RNA5SP515   | -- |
| ENSG00000201442 | 5.13E-15 | -2.63127 | 1 | 1 Y_RNA       | -- |
| ENSG00000201443 | 5.13E-15 | -2.63127 | 1 | 1 RNU6-309P   | -- |
| ENSG00000201444 | 5.13E-15 | -2.63127 | 1 | 1 RNU6-1082P  | -- |
| ENSG00000201447 | 5.13E-15 | -2.63127 | 1 | 1 RNA5SP509   | -- |
| ENSG00000201448 | 5.13E-15 | -2.63127 | 1 | 1 SNORA63     | -- |
| ENSG00000201450 | 5.13E-15 | -2.63127 | 1 | 1 RNU6-149P   | -- |
| ENSG00000201451 | 5.13E-15 | -2.63127 | 1 | 1 Y_RNA       | -- |
| ENSG00000201452 | 5.13E-15 | -2.63127 | 1 | 1 RNU6-1317P  | -- |
| ENSG00000201458 | 5.13E-15 | -2.63127 | 1 | 1 RNU4-4P     | -- |
| ENSG00000201464 | 5.13E-15 | -2.63127 | 1 | 1 Y_RNA       | -- |
| ENSG00000201465 | 5.13E-15 | -2.63127 | 1 | 1 SNORA51     | -- |
| ENSG00000201466 | 5.13E-15 | -2.63127 | 1 | 1 Y_RNA       | -- |
| ENSG00000201467 | 5.13E-15 | -2.63127 | 1 | 1 SNORA16     | -- |
| ENSG00000201474 | 5.13E-15 | -2.63127 | 1 | 1 RNU6-164P   | -- |
| ENSG00000201476 | 5.13E-15 | -2.63127 | 1 | 1 RNA5SP353   | -- |
| ENSG00000201482 | 5.13E-15 | -2.63127 | 1 | 1 SNORD115-17 | -- |
| ENSG00000201483 | 5.13E-15 | -2.63127 | 1 | 1 Y_RNA       | -- |
| ENSG00000201487 | 5.13E-15 | -2.63127 | 1 | 1 SNORD45B    | -- |
| ENSG00000201489 | 5.13E-15 | -2.63127 | 1 | 1 Y_RNA       | -- |
| ENSG00000201491 | 5.13E-15 | -2.63127 | 1 | 1 RNU4-75P    | -- |
| ENSG00000201493 | 5.13E-15 | -2.63127 | 1 | 1 RNU1-141P   | -- |
| ENSG00000201496 | 5.13E-15 | -2.63127 | 1 | 1 RN7SKP275   | -- |
| ENSG00000201498 | 5.13E-15 | -2.63127 | 1 | 1 Y_RNA       | -- |
| ENSG00000201500 | 5.13E-15 | -2.63127 | 1 | 1 SNORD113    | -- |
| ENSG00000201501 | 5.13E-15 | -2.63127 | 1 | 1 Y_RNA       | -- |
| ENSG00000201502 | 5.13E-15 | -2.63127 | 1 | 1 SNORD74     | -- |
| ENSG00000201509 | 5.13E-15 | -2.63127 | 1 | 1 Y_RNA       | -- |
| ENSG00000201510 | 5.13E-15 | -2.63127 | 1 | 1 RN7SKP217   | -- |
| ENSG00000201511 | 5.13E-15 | -2.63127 | 1 | 1 Y_RNA       | -- |
| ENSG00000201516 | 5.13E-15 | -2.63127 | 1 | 1 SNORA51     | -- |
| ENSG00000201517 | 5.13E-15 | -2.63127 | 1 | 1 RNU6-707P   | -- |
| ENSG00000201518 | 5.13E-15 | -2.63127 | 1 | 1 RNA5SP513   | -- |
| ENSG00000201519 | 5.13E-15 | -2.63127 | 1 | 1 RNU6-645P   | -- |
| ENSG00000201523 | 5.13E-15 | -2.63127 | 1 | 1 RNA5SP205   | -- |
| ENSG00000201524 | 5.13E-15 | -2.63127 | 1 | 1 RNU6-450P   | -- |
| ENSG00000201527 | 5.13E-15 | -2.63127 | 1 | 1 RNA5SP478   | -- |
| ENSG00000201529 | 5.13E-15 | -2.63127 | 1 | 1 Y_RNA       | -- |
| ENSG00000201532 | 5.13E-15 | -2.63127 | 1 | 1 RNA5SP194   | -- |
| ENSG00000201533 | 5.13E-15 | -2.63127 | 1 | 1 RN7SKP237   | -- |
| ENSG00000201535 | 5.13E-15 | -2.63127 | 1 | 1 Y_RNA       | -- |

|                 |          |          |   |               |    |
|-----------------|----------|----------|---|---------------|----|
| ENSG00000201541 | 5.13E-15 | -2.63127 | 1 | 1 SNORA1      | -- |
| ENSG00000201542 | 5.13E-15 | -2.63127 | 1 | 1 SNORA62     | -- |
| ENSG00000201545 | 5.13E-15 | -2.63127 | 1 | 1 RNU4-85P    | -- |
| ENSG00000201548 | 5.13E-15 | -2.63127 | 1 | 1 Y_RNA       | -- |
| ENSG00000201549 | 5.13E-15 | -2.63127 | 1 | 1 Y_RNA       | -- |
| ENSG00000201550 | 5.13E-15 | -2.63127 | 1 | 1 RNU6-726P   | -- |
| ENSG00000201554 | 5.13E-15 | -2.63127 | 1 | 1 Y_RNA       | -- |
| ENSG00000201555 | 5.13E-15 | -2.63127 | 1 | 1 Y_RNA       | -- |
| ENSG00000201557 | 5.13E-15 | -2.63127 | 1 | 1 SNORD114-15 | -- |
| ENSG00000201558 | 5.13E-15 | -2.63127 | 1 | 1 RNVU1-6     | -- |
| ENSG00000201560 | 5.13E-15 | -2.63127 | 1 | 1 RNU6-973P   | -- |
| ENSG00000201563 | 5.13E-15 | -2.63127 | 1 | 1 Y_RNA       | -- |
| ENSG00000201564 | 5.13E-15 | -2.63127 | 1 | 1 RN7SKP50    | -- |
| ENSG00000201565 | 5.13E-15 | -2.63127 | 1 | 1 Y_RNA       | -- |
| ENSG00000201566 | 5.13E-15 | -2.63127 | 1 | 1 Y_RNA       | -- |
| ENSG00000201567 | 5.13E-15 | -2.63127 | 1 | 1 RNA5SP510   | -- |
| ENSG00000201569 | 5.13E-15 | -2.63127 | 1 | 1 SNORD114-17 | -- |
| ENSG00000201570 | 5.13E-15 | -2.63127 | 1 | 1 RNU4-56P    | -- |
| ENSG00000201574 | 5.13E-15 | -2.63127 | 1 | 1 RNU1-93P    | -- |
| ENSG00000201579 | 5.13E-15 | -2.63127 | 1 | 1 RNU6-343P   | -- |
| ENSG00000201583 | 5.13E-15 | -2.63127 | 1 | 1 RN7SKP191   | -- |
| ENSG00000201584 | 5.13E-15 | -2.63127 | 1 | 1 Y_RNA       | -- |
| ENSG00000201586 | 5.13E-15 | -2.63127 | 1 | 1 RNU6-593P   | -- |
| ENSG00000201588 | 5.13E-15 | -2.63127 | 1 | 1 RNA5S2      | -- |
| ENSG00000201591 | 5.13E-15 | -2.63127 | 1 | 1 RNU6-99P    | -- |
| ENSG00000201594 | 5.13E-15 | -2.63127 | 1 | 1 RNA5SP517   | -- |
| ENSG00000201595 | 5.13E-15 | -2.63127 | 1 | 1 RNA5SP132   | -- |
| ENSG00000201596 | 5.13E-15 | -2.63127 | 1 | 1 Y_RNA       | -- |
| ENSG00000201598 | 5.13E-15 | -2.63127 | 1 | 1 RNU6-219P   | -- |
| ENSG00000201600 | 5.13E-15 | -2.63127 | 1 | 1 RN7SKP124   | -- |
| ENSG00000201602 | 5.13E-15 | -2.63127 | 1 | 1 Y_RNA       | -- |
| ENSG00000201604 | 5.13E-15 | -2.63127 | 1 | 1 RNU6-740P   | -- |
| ENSG00000201607 | 5.13E-15 | -2.63127 | 1 | 1 RNU4-16P    | -- |
| ENSG00000201608 | 5.13E-15 | -2.63127 | 1 | 1 RNU4-42P    | -- |
| ENSG00000201609 | 5.13E-15 | -2.63127 | 1 | 1 RNU4-28P    | -- |
| ENSG00000201610 | 5.13E-15 | -2.63127 | 1 | 1 RNA5SP84    | -- |
| ENSG00000201612 | 5.13E-15 | -2.63127 | 1 | 1 RN7SKP15    | -- |
| ENSG00000201613 | 5.13E-15 | -2.63127 | 1 | 1 RNU6-200P   | -- |
| ENSG00000201614 | 5.13E-15 | -2.63127 | 1 | 1 RNU4-19P    | -- |
| ENSG00000201618 | 5.13E-15 | -2.63127 | 1 | 1 RNA5SP505   | -- |
| ENSG00000201620 | 5.13E-15 | -2.63127 | 1 | 1 RNA5SP51    | -- |
| ENSG00000201623 | 5.13E-15 | -2.63127 | 1 | 1 RNU6-923P   | -- |
| ENSG00000201624 | 5.13E-15 | -2.63127 | 1 | 1 Y_RNA       | -- |
| ENSG00000201627 | 5.13E-15 | -2.63127 | 1 | 1 Y_RNA       | -- |
| ENSG00000201628 | 5.13E-15 | -2.63127 | 1 | 1 RNU4-7P     | -- |
| ENSG00000201633 | 5.13E-15 | -2.63127 | 1 | 1 Y_RNA       | -- |
| ENSG00000201634 | 5.13E-15 | -2.63127 | 1 | 1 SNORD115-48 | -- |
| ENSG00000201635 | 5.13E-15 | -2.63127 | 1 | 1 Y_RNA       | -- |
| ENSG00000201638 | 5.13E-15 | -2.63127 | 1 | 1 RNY4P16     | -- |
| ENSG00000201640 | 5.13E-15 | -2.63127 | 1 | 1 RN7SKP28    | -- |
| ENSG00000201641 | 5.13E-15 | -2.63127 | 1 | 1 RNU6-1187P  | -- |
| ENSG00000201642 | 5.13E-15 | -2.63127 | 1 | 1 RNU6-865P   | -- |
| ENSG00000201643 | 5.13E-15 | -2.63127 | 1 | 1 SNORA14A    | -- |
| ENSG00000201644 | 5.13E-15 | -2.63127 | 1 | 1 Y_RNA       | -- |
| ENSG00000201648 | 5.13E-15 | -2.63127 | 1 | 1 RNU4-91P    | -- |
| ENSG00000201649 | 5.13E-15 | -2.63127 | 1 | 1 Y_RNA       | -- |
| ENSG00000201654 | 5.13E-15 | -2.63127 | 1 | 1 RNU6-7      | -- |
| ENSG00000201658 | 5.13E-15 | -2.63127 | 1 | 1 RNU6-283P   | -- |

|                 |          |          |   |               |    |
|-----------------|----------|----------|---|---------------|----|
| ENSG00000201659 | 5.13E-15 | -2.63127 | 1 | 1 RNU12-2P    | -- |
| ENSG00000201660 | 5.13E-15 | -2.63127 | 1 | 1 SNORA20     | -- |
| ENSG00000201662 | 5.13E-15 | -2.63127 | 1 | 1 RNU6-60P    | -- |
| ENSG00000201663 | 5.13E-15 | -2.63127 | 1 | 1 Y_RNA       | -- |
| ENSG00000201665 | 5.13E-15 | -2.63127 | 1 | 1 RN7SKP6     | -- |
| ENSG00000201666 | 5.13E-15 | -2.63127 | 1 | 1 SNORD74     | -- |
| ENSG00000201668 | 5.13E-15 | -2.63127 | 1 | 1 Y_RNA       | -- |
| ENSG00000201671 | 5.13E-15 | -2.63127 | 1 | 1 RNA5SP90    | -- |
| ENSG00000201672 | 5.13E-15 | -2.63127 | 1 | 1 SNORD113-4  | -- |
| ENSG00000201674 | 5.13E-15 | -2.63127 | 1 | 1 U3          | -- |
| ENSG00000201675 | 5.13E-15 | -2.63127 | 1 | 1 SNORD32A    | -- |
| ENSG00000201676 | 5.13E-15 | -2.63127 | 1 | 1 Y_RNA       | -- |
| ENSG00000201679 | 5.13E-15 | -2.63127 | 1 | 1 SNORD115-15 | -- |
| ENSG00000201680 | 5.13E-15 | -2.63127 | 1 | 1 Y_RNA       | -- |
| ENSG00000201683 | 5.13E-15 | -2.63127 | 1 | 1 Y_RNA       | -- |
| ENSG00000201687 | 5.13E-15 | -2.63127 | 1 | 1 RNU6-1107P  | -- |
| ENSG00000201689 | 5.13E-15 | -2.63127 | 1 | 1 SNORD114-29 | -- |
| ENSG00000201690 | 5.13E-15 | -2.63127 | 1 | 1 RNY1P2      | -- |
| ENSG00000201695 | 5.13E-15 | -2.63127 | 1 | 1 RNA5SP334   | -- |
| ENSG00000201699 | 5.13E-15 | -2.63127 | 1 | 1 RNU1-59P    | -- |
| ENSG00000201700 | 5.13E-15 | -2.63127 | 1 | 1 SNORD113-3  | -- |
| ENSG00000201701 | 5.13E-15 | -2.63127 | 1 | 1 SNORA25     | -- |
| ENSG00000201704 | 5.13E-15 | -2.63127 | 1 | 1 RNA5SP396   | -- |
| ENSG00000201707 | 5.13E-15 | -2.63127 | 1 | 1 RNU6-818P   | -- |
| ENSG00000201708 | 5.13E-15 | -2.63127 | 1 | 1 RNA5SP359   | -- |
| ENSG00000201709 | 5.13E-15 | -2.63127 | 1 | 1 RNU6-686P   | -- |
| ENSG00000201710 | 5.13E-15 | -2.63127 | 1 | 1 SNORD113    | -- |
| ENSG00000201711 | 5.13E-15 | -2.63127 | 1 | 1 RNU6-1303P  | -- |
| ENSG00000201713 | 5.13E-15 | -2.63127 | 1 | 1 RNA5SP125   | -- |
| ENSG00000201715 | 5.13E-15 | -2.63127 | 1 | 1 RN7SKP133   | -- |
| ENSG00000201723 | 5.13E-15 | -2.63127 | 1 | 1 Y_RNA       | -- |
| ENSG00000201725 | 5.13E-15 | -2.63127 | 1 | 1 RNU6-304P   | -- |
| ENSG00000201727 | 5.13E-15 | -2.63127 | 1 | 1 RNA5SP173   | -- |
| ENSG00000201728 | 5.13E-15 | -2.63127 | 1 | 1 RNA5SP479   | -- |
| ENSG00000201733 | 5.13E-15 | -2.63127 | 1 | 1 SNORA43     | -- |
| ENSG00000201736 | 5.13E-15 | -2.63127 | 1 | 1 RNA5SP160   | -- |
| ENSG00000201737 | 5.13E-15 | -2.63127 | 1 | 1 RNU1-133P   | -- |
| ENSG00000201741 | 5.13E-15 | -2.63127 | 1 | 1 Y_RNA       | -- |
| ENSG00000201742 | 5.13E-15 | -2.63127 | 1 | 1 RNU6-563P   | -- |
| ENSG00000201744 | 5.13E-15 | -2.63127 | 1 | 1 RNU6-34P    | -- |
| ENSG00000201746 | 5.13E-15 | -2.63127 | 1 | 1 RNU6-828P   | -- |
| ENSG00000201747 | 5.13E-15 | -2.63127 | 1 | 1 RNU6-534P   | -- |
| ENSG00000201752 | 5.13E-15 | -2.63127 | 1 | 1 RNU6-119P   | -- |
| ENSG00000201754 | 5.13E-15 | -2.63127 | 1 | 1 SNORD52     | -- |
| ENSG00000201756 | 5.13E-15 | -2.63127 | 1 | 1 Y_RNA       | -- |
| ENSG00000201758 | 5.13E-15 | -2.63127 | 1 | 1 RN7SKP55    | -- |
| ENSG00000201763 | 5.13E-15 | -2.63127 | 1 | 1 RNA5SP267   | -- |
| ENSG00000201766 | 5.13E-15 | -2.63127 | 1 | 1 RNA5SP302   | -- |
| ENSG00000201770 | 5.13E-15 | -2.63127 | 1 | 1 RNU6-384P   | -- |
| ENSG00000201774 | 5.13E-15 | -2.63127 | 1 | 1 Y_RNA       | -- |
| ENSG00000201775 | 5.13E-15 | -2.63127 | 1 | 1 RNU6-1325P  | -- |
| ENSG00000201778 | 5.13E-15 | -2.63127 | 1 | 1 Y_RNA       | -- |
| ENSG00000201780 | 5.13E-15 | -2.63127 | 1 | 1 RNU6-275P   | -- |
| ENSG00000201782 | 5.13E-15 | -2.63127 | 1 | 1 RN7SKP226   | -- |
| ENSG00000201785 | 5.13E-15 | -2.63127 | 1 | 1 SNORD117    | -- |
| ENSG00000201786 | 5.13E-15 | -2.63127 | 1 | 1 Y_RNA       | -- |
| ENSG00000201788 | 5.13E-15 | -2.63127 | 1 | 1 Y_RNA       | -- |
| ENSG00000201789 | 5.13E-15 | -2.63127 | 1 | 1 RNU6-1071P  | -- |



|                 |          |          |   |                |    |
|-----------------|----------|----------|---|----------------|----|
| ENSG00000201790 | 5.13E-15 | -2.63127 | 1 | 1 RNA5SP189    | -- |
| ENSG00000201791 | 5.13E-15 | -2.63127 | 1 | 1 SNORA63      | -- |
| ENSG00000201792 | 5.13E-15 | -2.63127 | 1 | 1 RNU6-1192P   | -- |
| ENSG00000201794 | 5.13E-15 | -2.63127 | 1 | 1 RN7SKP130    | -- |
| ENSG00000201796 | 5.13E-15 | -2.63127 | 1 | 1 RNU6-392P    | -- |
| ENSG00000201800 | 5.13E-15 | -2.63127 | 1 | 1 Y_RNA        | -- |
| ENSG00000201801 | 5.13E-15 | -2.63127 | 1 | 1 RNU5E-4P     | -- |
| ENSG00000201805 | 5.13E-15 | -2.63127 | 1 | 1 RNU6-1180P   | -- |
| ENSG00000201806 | 5.13E-15 | -2.63127 | 1 | 1 RNU4-8P      | -- |
| ENSG00000201807 | 5.13E-15 | -2.63127 | 1 | 1 SNORA27      | -- |
| ENSG00000201809 | 5.13E-15 | -2.63127 | 1 | 1 U8           | -- |
| ENSG00000201810 | 5.13E-15 | -2.63127 | 1 | 1 U8           | -- |
| ENSG00000201811 | 5.13E-15 | -2.63127 | 1 | 1 SNORA71      | -- |
| ENSG00000201812 | 5.13E-15 | -2.63127 | 1 | 1 RNA5SP488    | -- |
| ENSG00000201813 | 5.13E-15 | -2.63127 | 1 | 1 RNU6-915P    | -- |
| ENSG00000201815 | 5.13E-15 | -2.63127 | 1 | 1 RNU6-526P    | -- |
| ENSG00000201816 | 5.13E-15 | -2.63127 | 1 | 1 SNORA73      | -- |
| ENSG00000201818 | 5.13E-15 | -2.63127 | 1 | 1 RNY4P17      | -- |
| ENSG00000201821 | 5.13E-15 | -2.63127 | 1 | 1 RNU4-9P      | -- |
| ENSG00000201822 | 5.13E-15 | -2.63127 | 1 | 1 RNA5SP149    | -- |
| ENSG00000201823 | 5.13E-15 | -2.63127 | 1 | 1 SNORD48      | -- |
| ENSG00000201825 | 5.13E-15 | -2.63127 | 1 | 1 RNU6-1131P   | -- |
| ENSG00000201826 | 5.13E-15 | -2.63127 | 1 | 1 RNU6-867P    | -- |
| ENSG00000201827 | 5.13E-15 | -2.63127 | 1 | 1 SNORA33      | -- |
| ENSG00000201830 | 5.13E-15 | -2.63127 | 1 | 1 Y_RNA        | -- |
| ENSG00000201831 | 5.13E-15 | -2.63127 | 1 | 1 SNORD115-1   | -- |
| ENSG00000201839 | 5.13E-15 | -2.63127 | 1 | 1 SNORD114-3   | -- |
| ENSG00000201843 | 5.13E-15 | -2.63127 | 1 | 1 Y_RNA        | -- |
| ENSG00000201846 | 5.13E-15 | -2.63127 | 1 | 1 RNA5SP166    | -- |
| ENSG00000201847 | 5.13E-15 | -2.63127 | 1 | 1 SNORD31      | -- |
| ENSG00000201850 | 5.13E-15 | -2.63127 | 1 | 1 Y_RNA        | -- |
| ENSG00000201852 | 5.13E-15 | -2.63127 | 1 | 1 RNU6-702P    | -- |
| ENSG00000201853 | 5.13E-15 | -2.63127 | 1 | 1 snosnR60_Z15 | -- |
| ENSG00000201856 | 5.13E-15 | -2.63127 | 1 | 1 RNA5SP331    | -- |
| ENSG00000201860 | 5.13E-15 | -2.63127 | 1 | 1 Y_RNA        | -- |
| ENSG00000201861 | 5.13E-15 | -2.63127 | 1 | 1 RNA5SP298    | -- |
| ENSG00000201862 | 5.13E-15 | -2.63127 | 1 | 1 Y_RNA        | -- |
| ENSG00000201863 | 5.13E-15 | -2.63127 | 1 | 1 SNORA51      | -- |
| ENSG00000201867 | 5.13E-15 | -2.63127 | 1 | 1 Y_RNA        | -- |
| ENSG00000201868 | 5.13E-15 | -2.63127 | 1 | 1 Y_RNA        | -- |
| ENSG00000201869 | 5.13E-15 | -2.63127 | 1 | 1 RNU6-294P    | -- |
| ENSG00000201875 | 5.13E-15 | -2.63127 | 1 | 1 RN7SKP178    | -- |
| ENSG00000201876 | 5.13E-15 | -2.63127 | 1 | 1 RNA5SP97     | -- |
| ENSG00000201881 | 5.13E-15 | -2.63127 | 1 | 1 Y_RNA        | -- |
| ENSG00000201882 | 5.13E-15 | -2.63127 | 1 | 1 snoU2-30     | -- |
| ENSG00000201884 | 5.13E-15 | -2.63127 | 1 | 1 Y_RNA        | -- |
| ENSG00000201885 | 5.13E-15 | -2.63127 | 1 | 1 Y_RNA        | -- |
| ENSG00000201892 | 5.13E-15 | -2.63127 | 1 | 1 Y_RNA        | -- |
| ENSG00000201894 | 5.13E-15 | -2.63127 | 1 | 1 RNU6-967P    | -- |
| ENSG00000201896 | 5.13E-15 | -2.63127 | 1 | 1 RN7SKP153    | -- |
| ENSG00000201899 | 5.13E-15 | -2.63127 | 1 | 1 SNORD114-24  | -- |
| ENSG00000201900 | 5.13E-15 | -2.63127 | 1 | 1 Y_RNA        | -- |
| ENSG00000201901 | 5.13E-15 | -2.63127 | 1 | 1 RN7SKP48     | -- |
| ENSG00000201907 | 5.13E-15 | -2.63127 | 1 | 1 SNORD115-38  | -- |
| ENSG00000201909 | 5.13E-15 | -2.63127 | 1 | 1 RNU6-590P    | -- |
| ENSG00000201910 | 5.13E-15 | -2.63127 | 1 | 1 RNU1-140P    | -- |
| ENSG00000201912 | 5.13E-15 | -2.63127 | 1 | 1 RN7SKP189    | -- |
| ENSG00000201913 | 5.13E-15 | -2.63127 | 1 | 1 Y_RNA        | -- |

|                 |          |          |   |               |    |
|-----------------|----------|----------|---|---------------|----|
| ENSG00000201916 | 5.13E-15 | -2.63127 | 1 | 1 Y_RNA       | -- |
| ENSG00000201919 | 5.13E-15 | -2.63127 | 1 | 1 RNU6-1022P  | -- |
| ENSG00000201920 | 5.13E-15 | -2.63127 | 1 | 1 RNA5SP442   | -- |
| ENSG00000201922 | 5.13E-15 | -2.63127 | 1 | 1 RNU1-43P    | -- |
| ENSG00000201923 | 5.13E-15 | -2.63127 | 1 | 1 RNA5SP485   | -- |
| ENSG00000201925 | 5.13E-15 | -2.63127 | 1 | 1 RNA5S15     | -- |
| ENSG00000201931 | 5.13E-15 | -2.63127 | 1 | 1 RNA5SP172   | -- |
| ENSG00000201933 | 5.13E-15 | -2.63127 | 1 | 1 Y_RNA       | -- |
| ENSG00000201938 | 5.13E-15 | -2.63127 | 1 | 1 Y_RNA       | -- |
| ENSG00000201939 | 5.13E-15 | -2.63127 | 1 | 1 RNA5SP224   | -- |
| ENSG00000201942 | 5.13E-15 | -2.63127 | 1 | 1 RNA5SP363   | -- |
| ENSG00000201943 | 5.13E-15 | -2.63127 | 1 | 1 SNORD115-10 | -- |
| ENSG00000201945 | 5.13E-15 | -2.63127 | 1 | 1 SNORA70     | -- |
| ENSG00000201950 | 5.13E-15 | -2.63127 | 1 | 1 SNORD113-9  | -- |
| ENSG00000201954 | 5.13E-15 | -2.63127 | 1 | 1 RNU6-673P   | -- |
| ENSG00000201955 | 5.13E-15 | -2.63127 | 1 | 1 RNY3P1      | -- |
| ENSG00000201957 | 5.13E-15 | -2.63127 | 1 | 1 SNORA25     | -- |
| ENSG00000201959 | 5.13E-15 | -2.63127 | 1 | 1 Y_RNA       | -- |
| ENSG00000201962 | 5.13E-15 | -2.63127 | 1 | 1 RNA5SP126   | -- |
| ENSG00000201965 | 5.13E-15 | -2.63127 | 1 | 1 Y_RNA       | -- |
| ENSG00000201966 | 5.13E-15 | -2.63127 | 1 | 1 RNA5-8SP4   | -- |
| ENSG00000201967 | 5.13E-15 | -2.63127 | 1 | 1 RN7SKP22    | -- |
| ENSG00000201968 | 5.13E-15 | -2.63127 | 1 | 1 RNA5SP138   | -- |
| ENSG00000201969 | 5.13E-15 | -2.63127 | 1 | 1 SNORD115-20 | -- |
| ENSG00000201980 | 5.13E-15 | -2.63127 | 1 | 1 SNORA62     | -- |
| ENSG00000201984 | 5.13E-15 | -2.63127 | 1 | 1 Y_RNA       | -- |
| ENSG00000201987 | 5.13E-15 | -2.63127 | 1 | 1 Y_RNA       | -- |
| ENSG00000201988 | 5.13E-15 | -2.63127 | 1 | 1 Y_RNA       | -- |
| ENSG00000201990 | 5.13E-15 | -2.63127 | 1 | 1 Y_RNA       | -- |
| ENSG00000201992 | 5.13E-15 | -2.63127 | 1 | 1 SNORD115-35 | -- |
| ENSG00000201998 | 5.13E-15 | -2.63127 | 1 | 1 SNORA23     | -- |
| ENSG00000201999 | 5.13E-15 | -2.63127 | 1 | 1 RNA5SP428   | -- |
| ENSG00000202000 | 5.13E-15 | -2.63127 | 1 | 1 RNU1-36P    | -- |
| ENSG00000202001 | 5.13E-15 | -2.63127 | 1 | 1 Y_RNA       | -- |
| ENSG00000202008 | 5.13E-15 | -2.63127 | 1 | 1 Y_RNA       | -- |
| ENSG00000202012 | 5.13E-15 | -2.63127 | 1 | 1 RNY4P15     | -- |
| ENSG00000202014 | 5.13E-15 | -2.63127 | 1 | 1 Y_RNA       | -- |
| ENSG00000202016 | 5.13E-15 | -2.63127 | 1 | 1 RNU6-619P   | -- |
| ENSG00000202017 | 5.13E-15 | -2.63127 | 1 | 1 RNU6-806P   | -- |
| ENSG00000202019 | 5.13E-15 | -2.63127 | 1 | 1 Y_RNA       | -- |
| ENSG00000202021 | 5.13E-15 | -2.63127 | 1 | 1 Y_RNA       | -- |
| ENSG00000202023 | 5.13E-15 | -2.63127 | 1 | 1 SNORD81     | -- |
| ENSG00000202024 | 5.13E-15 | -2.63127 | 1 | 1 RNU6-934P   | -- |
| ENSG00000202025 | 5.13E-15 | -2.63127 | 1 | 1 RNU6-1240P  | -- |
| ENSG00000202026 | 5.13E-15 | -2.63127 | 1 | 1 RNU6-1134P  | -- |
| ENSG00000202027 | 5.13E-15 | -2.63127 | 1 | 1 Y_RNA       | -- |
| ENSG00000202029 | 5.13E-15 | -2.63127 | 1 | 1 RNU6-580P   | -- |
| ENSG00000202034 | 5.13E-15 | -2.63127 | 1 | 1 RNU6-399P   | -- |
| ENSG00000202035 | 5.13E-15 | -2.63127 | 1 | 1 Y_RNA       | -- |
| ENSG00000202039 | 5.13E-15 | -2.63127 | 1 | 1 RNU6-215P   | -- |
| ENSG00000202041 | 5.13E-15 | -2.63127 | 1 | 1 Y_RNA       | -- |
| ENSG00000202044 | 5.13E-15 | -2.63127 | 1 | 1 RNA5SP223   | -- |
| ENSG00000202046 | 5.13E-15 | -2.63127 | 1 | 1 Y_RNA       | -- |
| ENSG00000202047 | 5.13E-15 | -2.63127 | 1 | 1 RNA5SP324   | -- |
| ENSG00000202048 | 5.13E-15 | -2.63127 | 1 | 1 SNORD114-20 | -- |
| ENSG00000202050 | 5.13E-15 | -2.63127 | 1 | 1 RNU6-391P   | -- |
| ENSG00000202051 | 5.13E-15 | -2.63127 | 1 | 1 RNU6-382P   | -- |
| ENSG00000202054 | 5.13E-15 | -2.63127 | 1 | 1 RNA5SP152   | -- |

|                 |          |          |   |               |    |
|-----------------|----------|----------|---|---------------|----|
| ENSG00000202056 | 5.13E-15 | -2.63127 | 1 | 1 RNA5SP19    | -- |
| ENSG00000202059 | 5.13E-15 | -2.63127 | 1 | 1 SNORA1      | -- |
| ENSG00000202060 | 5.13E-15 | -2.63127 | 1 | 1 RNA5SP455   | -- |
| ENSG00000202063 | 5.13E-15 | -2.63127 | 1 | 1 RNA5SP79    | -- |
| ENSG00000202064 | 5.13E-15 | -2.63127 | 1 | 1 RNVU1-11    | -- |
| ENSG00000202067 | 5.13E-15 | -2.63127 | 1 | 1 Y_RNA       | -- |
| ENSG00000202069 | 5.13E-15 | -2.63127 | 1 | 1 RNU4-66P    | -- |
| ENSG00000202070 | 5.13E-15 | -2.63127 | 1 | 1 RNU6-1175P  | -- |
| ENSG00000202071 | 5.13E-15 | -2.63127 | 1 | 1 Y_RNA       | -- |
| ENSG00000202072 | 5.13E-15 | -2.63127 | 1 | 1 Y_RNA       | -- |
| ENSG00000202074 | 5.13E-15 | -2.63127 | 1 | 1 RNU6-715P   | -- |
| ENSG00000202077 | 5.13E-15 | -2.63127 | 1 | 1 RNU1-60P    | -- |
| ENSG00000202079 | 5.13E-15 | -2.63127 | 1 | 1 Y_RNA       | -- |
| ENSG00000202081 | 5.13E-15 | -2.63127 | 1 | 1 RNU6-1280P  | -- |
| ENSG00000202082 | 5.13E-15 | -2.63127 | 1 | 1 RNU6-290P   | -- |
| ENSG00000202089 | 5.13E-15 | -2.63127 | 1 | 1 RNU6-1306P  | -- |
| ENSG00000202092 | 5.13E-15 | -2.63127 | 1 | 1 RNA5SP190   | -- |
| ENSG00000202093 | 5.13E-15 | -2.63127 | 1 | 1 SNORD58C    | -- |
| ENSG00000202095 | 5.13E-15 | -2.63127 | 1 | 1 RNU6-1172P  | -- |
| ENSG00000202099 | 5.13E-15 | -2.63127 | 1 | 1 RNU6-234P   | -- |
| ENSG00000202100 | 5.13E-15 | -2.63127 | 1 | 1 Y_RNA       | -- |
| ENSG00000202103 | 5.13E-15 | -2.63127 | 1 | 1 RNU4-12P    | -- |
| ENSG00000202105 | 5.13E-15 | -2.63127 | 1 | 1 Y_RNA       | -- |
| ENSG00000202111 | 5.13E-15 | -2.63127 | 1 | 1 VTRNA1-2    | -- |
| ENSG00000202112 | 5.13E-15 | -2.63127 | 1 | 1 RNU6-690P   | -- |
| ENSG00000202124 | 5.13E-15 | -2.63127 | 1 | 1 RNY4P3      | -- |
| ENSG00000202125 | 5.13E-15 | -2.63127 | 1 | 1 RNU1-100P   | -- |
| ENSG00000202129 | 5.13E-15 | -2.63127 | 1 | 1 RNY5P1      | -- |
| ENSG00000202137 | 5.13E-15 | -2.63127 | 1 | 1 Y_RNA       | -- |
| ENSG00000202140 | 5.13E-15 | -2.63127 | 1 | 1 Y_RNA       | -- |
| ENSG00000202141 | 5.13E-15 | -2.63127 | 1 | 1 Y_RNA       | -- |
| ENSG00000202142 | 5.13E-15 | -2.63127 | 1 | 1 SNORD114-18 | -- |
| ENSG00000202144 | 5.13E-15 | -2.63127 | 1 | 1 Y_RNA       | -- |
| ENSG00000202146 | 5.13E-15 | -2.63127 | 1 | 1 Y_RNA       | -- |
| ENSG00000202147 | 5.13E-15 | -2.63127 | 1 | 1 RNA5SP329   | -- |
| ENSG00000202150 | 5.13E-15 | -2.63127 | 1 | 1 RNU6-407P   | -- |
| ENSG00000202151 | 5.13E-15 | -2.63127 | 1 | 1 RNY4P28     | -- |
| ENSG00000202157 | 5.13E-15 | -2.63127 | 1 | 1 RNU4-11P    | -- |
| ENSG00000202159 | 5.13E-15 | -2.63127 | 1 | 1 RNU6-742P   | -- |
| ENSG00000202160 | 5.13E-15 | -2.63127 | 1 | 1 RNU5E-7P    | -- |
| ENSG00000202164 | 5.13E-15 | -2.63127 | 1 | 1 RNA5SP117   | -- |
| ENSG00000202167 | 5.13E-15 | -2.63127 | 1 | 1 RNU1-114P   | -- |
| ENSG00000202169 | 5.13E-15 | -2.63127 | 1 | 1 Y_RNA       | -- |
| ENSG00000202172 | 5.13E-15 | -2.63127 | 1 | 1 RNU6-1327P  | -- |
| ENSG00000202174 | 5.13E-15 | -2.63127 | 1 | 1 RNA5-8SP5   | -- |
| ENSG00000202175 | 5.13E-15 | -2.63127 | 1 | 1 RNA5SP128   | -- |
| ENSG00000202177 | 5.13E-15 | -2.63127 | 1 | 1 Y_RNA       | -- |
| ENSG00000202178 | 5.13E-15 | -2.63127 | 1 | 1 Y_RNA       | -- |
| ENSG00000202182 | 5.13E-15 | -2.63127 | 1 | 1 Y_RNA       | -- |
| ENSG00000202183 | 5.13E-15 | -2.63127 | 1 | 1 SNORA4      | -- |
| ENSG00000202184 | 5.13E-15 | -2.63127 | 1 | 1 RNU6-1283P  | -- |
| ENSG00000202186 | 5.13E-15 | -2.63127 | 1 | 1 RNU6-497P   | -- |
| ENSG00000202187 | 5.13E-15 | -2.63127 | 1 | 1 RNA5SP355   | -- |
| ENSG00000202188 | 5.13E-15 | -2.63127 | 1 | 1 SNORD115-31 | -- |
| ENSG00000202189 | 5.13E-15 | -2.63127 | 1 | 1 SNORA30     | -- |
| ENSG00000202190 | 5.13E-15 | -2.63127 | 1 | 1 Y_RNA       | -- |
| ENSG00000202191 | 5.13E-15 | -2.63127 | 1 | 1 SNORD113-1  | -- |
| ENSG00000202193 | 5.13E-15 | -2.63127 | 1 | 1 RNA5SP427   | -- |

|                 |          |          |   |               |    |
|-----------------|----------|----------|---|---------------|----|
| ENSG00000202195 | 5.13E-15 | -2.63127 | 1 | 1 Y_RNA       | -- |
| ENSG00000202199 | 5.13E-15 | -2.63127 | 1 | 1 RNU1-115P   | -- |
| ENSG00000202200 | 5.13E-15 | -2.63127 | 1 | 1 Y_RNA       | -- |
| ENSG00000202205 | 5.13E-15 | -2.63127 | 1 | 1 RNU6-1034P  | -- |
| ENSG00000202206 | 5.13E-15 | -2.63127 | 1 | 1 RNU6-169P   | -- |
| ENSG00000202211 | 5.13E-15 | -2.63127 | 1 | 1 Y_RNA       | -- |
| ENSG00000202215 | 5.13E-15 | -2.63127 | 1 | 1 RNU1-51P    | -- |
| ENSG00000202216 | 5.13E-15 | -2.63127 | 1 | 1 SNORA43     | -- |
| ENSG00000202217 | 5.13E-15 | -2.63127 | 1 | 1 RN7SKP47    | -- |
| ENSG00000202224 | 5.13E-15 | -2.63127 | 1 | 1 Y_RNA       | -- |
| ENSG00000202225 | 5.13E-15 | -2.63127 | 1 | 1 RNA5SP240   | -- |
| ENSG00000202227 | 5.13E-15 | -2.63127 | 1 | 1 RNU6-282P   | -- |
| ENSG00000202229 | 5.13E-15 | -2.63127 | 1 | 1 RNU6-1138P  | -- |
| ENSG00000202231 | 5.13E-15 | -2.63127 | 1 | 1 SNORA9      | -- |
| ENSG00000202233 | 5.13E-15 | -2.63127 | 1 | 1 U3          | -- |
| ENSG00000202237 | 5.13E-15 | -2.63127 | 1 | 1 RNU6-53P    | -- |
| ENSG00000202239 | 5.13E-15 | -2.63127 | 1 | 1 RNU6-396P   | -- |
| ENSG00000202240 | 5.13E-15 | -2.63127 | 1 | 1 RNU6-737P   | -- |
| ENSG00000202241 | 5.13E-15 | -2.63127 | 1 | 1 RN7SKP186   | -- |
| ENSG00000202242 | 5.13E-15 | -2.63127 | 1 | 1 RNU6-1276P  | -- |
| ENSG00000202245 | 5.13E-15 | -2.63127 | 1 | 1 RNU6-728P   | -- |
| ENSG00000202248 | 5.13E-15 | -2.63127 | 1 | 1 RNA5SP85    | -- |
| ENSG00000202249 | 5.13E-15 | -2.63127 | 1 | 1 RNU5E-5P    | -- |
| ENSG00000202250 | 5.13E-15 | -2.63127 | 1 | 1 RNU6-443P   | -- |
| ENSG00000202251 | 5.13E-15 | -2.63127 | 1 | 1 Y_RNA       | -- |
| ENSG00000202252 | 5.13E-15 | -2.63127 | 1 | 1 SNORD14C    | -- |
| ENSG00000202254 | 5.13E-15 | -2.63127 | 1 | 1 Y_RNA       | -- |
| ENSG00000202255 | 5.13E-15 | -2.63127 | 1 | 1 Y_RNA       | -- |
| ENSG00000202257 | 5.13E-15 | -2.63127 | 1 | 1 RNA5S16     | -- |
| ENSG00000202261 | 5.13E-15 | -2.63127 | 1 | 1 SNORD115-44 | -- |
| ENSG00000202263 | 5.13E-15 | -2.63127 | 1 | 1 RNA5SP22    | -- |
| ENSG00000202264 | 5.13E-15 | -2.63127 | 1 | 1 RNA5SP77    | -- |
| ENSG00000202265 | 5.13E-15 | -2.63127 | 1 | 1 RNU6-596P   | -- |
| ENSG00000202268 | 5.13E-15 | -2.63127 | 1 | 1 U3          | -- |
| ENSG00000202269 | 5.13E-15 | -2.63127 | 1 | 1 U8          | -- |
| ENSG00000202270 | 5.13E-15 | -2.63127 | 1 | 1 SNORD114-12 | -- |
| ENSG00000202273 | 5.13E-15 | -2.63127 | 1 | 1 Y_RNA       | -- |
| ENSG00000202275 | 5.13E-15 | -2.63127 | 1 | 1 SNORD51     | -- |
| ENSG00000202276 | 5.13E-15 | -2.63127 | 1 | 1 Y_RNA       | -- |
| ENSG00000202281 | 5.13E-15 | -2.63127 | 1 | 1 RNA5SP235   | -- |
| ENSG00000202283 | 5.13E-15 | -2.63127 | 1 | 1 SNORA33     | -- |
| ENSG00000202285 | 5.13E-15 | -2.63127 | 1 | 1 RNU6-117P   | -- |
| ENSG00000202293 | 5.13E-15 | -2.63127 | 1 | 1 SNORD114-22 | -- |
| ENSG00000202296 | 5.13E-15 | -2.63127 | 1 | 1 RNU6-1335P  | -- |
| ENSG00000202297 | 5.13E-15 | -2.63127 | 1 | 1 Y_RNA       | -- |
| ENSG00000202300 | 5.13E-15 | -2.63127 | 1 | 1 RNU6-487P   | -- |
| ENSG00000202304 | 5.13E-15 | -2.63127 | 1 | 1 RNU6-1130P  | -- |
| ENSG00000202306 | 5.13E-15 | -2.63127 | 1 | 1 Y_RNA       | -- |
| ENSG00000202308 | 5.13E-15 | -2.63127 | 1 | 1 RNU6-996P   | -- |
| ENSG00000202309 | 5.13E-15 | -2.63127 | 1 | 1 Y_RNA       | -- |
| ENSG00000202310 | 5.13E-15 | -2.63127 | 1 | 1 Y_RNA       | -- |
| ENSG00000202313 | 5.13E-15 | -2.63127 | 1 | 1 RNU1-64P    | -- |
| ENSG00000202317 | 5.13E-15 | -2.63127 | 1 | 1 RNU1-84P    | -- |
| ENSG00000202322 | 5.13E-15 | -2.63127 | 1 | 1 RNA5SP131   | -- |
| ENSG00000202324 | 5.13E-15 | -2.63127 | 1 | 1 RNA5SP366   | -- |
| ENSG00000202329 | 5.13E-15 | -2.63127 | 1 | 1 RNU6-609P   | -- |
| ENSG00000202331 | 5.13E-15 | -2.63127 | 1 | 1 RNA5SP167   | -- |
| ENSG00000202332 | 5.13E-15 | -2.63127 | 1 | 1 Y_RNA       | -- |

|                 |          |          |   |               |    |
|-----------------|----------|----------|---|---------------|----|
| ENSG00000202334 | 5.13E-15 | -2.63127 | 1 | 1 RNA5SP238   | -- |
| ENSG00000202335 | 5.13E-15 | -2.63127 | 1 | 1 SNORD50     | -- |
| ENSG00000202336 | 5.13E-15 | -2.63127 | 1 | 1 RNU6-359P   | -- |
| ENSG00000202339 | 5.13E-15 | -2.63127 | 1 | 1 RNU4-45P    | -- |
| ENSG00000202341 | 5.13E-15 | -2.63127 | 1 | 1 RNU6-1051P  | -- |
| ENSG00000202344 | 5.13E-15 | -2.63127 | 1 | 1 RN7SKP208   | -- |
| ENSG00000202345 | 5.13E-15 | -2.63127 | 1 | 1 Y_RNA       | -- |
| ENSG00000202350 | 5.13E-15 | -2.63127 | 1 | 1 RNU6-326P   | -- |
| ENSG00000202351 | 5.13E-15 | -2.63127 | 1 | 1 RN7SKP204   | -- |
| ENSG00000202354 | 5.13E-15 | -2.63127 | 1 | 1 RNY3        | -- |
| ENSG00000202356 | 5.13E-15 | -2.63127 | 1 | 1 RNA5SP277   | -- |
| ENSG00000202357 | 5.13E-15 | -2.63127 | 1 | 1 Y_RNA       | -- |
| ENSG00000202360 | 5.13E-15 | -2.63127 | 1 | 1 RN7SKP249   | -- |
| ENSG00000202361 | 5.13E-15 | -2.63127 | 1 | 1 Y_RNA       | -- |
| ENSG00000202363 | 5.13E-15 | -2.63127 | 1 | 1 SNORA62     | -- |
| ENSG00000202368 | 5.13E-15 | -2.63127 | 1 | 1 Y_RNA       | -- |
| ENSG00000202373 | 5.13E-15 | -2.63127 | 1 | 1 SNORD115-43 | -- |
| ENSG00000202374 | 5.13E-15 | -2.63127 | 1 | 1 SNORA62     | -- |
| ENSG00000202377 | 5.13E-15 | -2.63127 | 1 | 1 SNORA25     | -- |
| ENSG00000202380 | 5.13E-15 | -2.63127 | 1 | 1 RNU1-55P    | -- |
| ENSG00000202382 | 5.13E-15 | -2.63127 | 1 | 1 Y_RNA       | -- |
| ENSG00000202383 | 5.13E-15 | -2.63127 | 1 | 1 RNA5SP279   | -- |
| ENSG00000202385 | 5.13E-15 | -2.63127 | 1 | 1 Y_RNA       | -- |
| ENSG00000202386 | 5.13E-15 | -2.63127 | 1 | 1 RNA5SP211   | -- |
| ENSG00000202388 | 5.13E-15 | -2.63127 | 1 | 1 Y_RNA       | -- |
| ENSG00000202389 | 5.13E-15 | -2.63127 | 1 | 1 SNORA70     | -- |
| ENSG00000202392 | 5.13E-15 | -2.63127 | 1 | 1 RN7SKP292   | -- |
| ENSG00000202395 | 5.13E-15 | -2.63127 | 1 | 1 RN7SKP1     | -- |
| ENSG00000202398 | 5.13E-15 | -2.63127 | 1 | 1 RNU6-61P    | -- |
| ENSG00000202400 | 5.13E-15 | -2.63127 | 1 | 1 SNORD82     | -- |
| ENSG00000202402 | 5.13E-15 | -2.63127 | 1 | 1 Y_RNA       | -- |
| ENSG00000202406 | 5.13E-15 | -2.63127 | 1 | 1 RN7SKP187   | -- |
| ENSG00000202407 | 5.13E-15 | -2.63127 | 1 | 1 Y_RNA       | -- |
| ENSG00000202408 | 5.13E-15 | -2.63127 | 1 | 1 RNU1-122P   | -- |
| ENSG00000202410 | 5.13E-15 | -2.63127 | 1 | 1 Y_RNA       | -- |
| ENSG00000202411 | 5.13E-15 | -2.63127 | 1 | 1 RNA5SP259   | -- |
| ENSG00000202412 | 5.13E-15 | -2.63127 | 1 | 1 Y_RNA       | -- |
| ENSG00000202414 | 5.13E-15 | -2.63127 | 1 | 1 Y_RNA       | -- |
| ENSG00000202422 | 5.13E-15 | -2.63127 | 1 | 1 RNA5SP30    | -- |
| ENSG00000202423 | 5.13E-15 | -2.63127 | 1 | 1 RNU6-827P   | -- |
| ENSG00000202427 | 5.13E-15 | -2.63127 | 1 | 1 RNU6-744P   | -- |
| ENSG00000202428 | 5.13E-15 | -2.63127 | 1 | 1 RNU6-108P   | -- |
| ENSG00000202429 | 5.13E-15 | -2.63127 | 1 | 1 RNU4-48P    | -- |
| ENSG00000202430 | 5.13E-15 | -2.63127 | 1 | 1 RNA5SP88    | -- |
| ENSG00000202431 | 5.13E-15 | -2.63127 | 1 | 1 RNU6-438P   | -- |
| ENSG00000202433 | 5.13E-15 | -2.63127 | 1 | 1 RNU6-54P    | -- |
| ENSG00000202438 | 5.13E-15 | -2.63127 | 1 | 1 Y_RNA       | -- |
| ENSG00000202440 | 5.13E-15 | -2.63127 | 1 | 1 SNORD42     | -- |
| ENSG00000202441 | 5.13E-15 | -2.63127 | 1 | 1 RNY4P10     | -- |
| ENSG00000202444 | 5.13E-15 | -2.63127 | 1 | 1 RNU5E-6P    | -- |
| ENSG00000202445 | 5.13E-15 | -2.63127 | 1 | 1 RNU6-669P   | -- |
| ENSG00000202449 | 5.13E-15 | -2.63127 | 1 | 1 SNORA63     | -- |
| ENSG00000202459 | 5.13E-15 | -2.63127 | 1 | 1 Y_RNA       | -- |
| ENSG00000202468 | 5.13E-15 | -2.63127 | 1 | 1 RNU4-17P    | -- |
| ENSG00000202469 | 5.13E-15 | -2.63127 | 1 | 1 Y_RNA       | -- |
| ENSG00000202470 | 5.13E-15 | -2.63127 | 1 | 1 Y_RNA       | -- |
| ENSG00000202471 | 5.13E-15 | -2.63127 | 1 | 1 RNU4-20P    | -- |
| ENSG00000202473 | 5.13E-15 | -2.63127 | 1 | 1 RN7SKP81    | -- |

|                 |          |          |   |                 |        |
|-----------------|----------|----------|---|-----------------|--------|
| ENSG00000202474 | 5.13E-15 | -2.63127 | 1 | 1 RNA5SP283     | --     |
| ENSG00000202476 | 5.13E-15 | -2.63127 | 1 | 1 Y_RNA         | --     |
| ENSG00000202478 | 5.13E-15 | -2.63127 | 1 | 1 RNU6-81P      | --     |
| ENSG00000202479 | 5.13E-15 | -2.63127 | 1 | 1 SNORD14       | --     |
| ENSG00000202482 | 5.13E-15 | -2.63127 | 1 | 1 U3            | --     |
| ENSG00000202485 | 5.13E-15 | -2.63127 | 1 | 1 RNU6-499P     | --     |
| ENSG00000202490 | 5.13E-15 | -2.63127 | 1 | 1 RNU6-597P     | --     |
| ENSG00000202491 | 5.13E-15 | -2.63127 | 1 | 1 RNU6-716P     | --     |
| ENSG00000202495 | 5.13E-15 | -2.63127 | 1 | 1 Y_RNA         | --     |
| ENSG00000202496 | 5.13E-15 | -2.63127 | 1 | 1 RNVI1-20      | --     |
| ENSG00000202497 | 5.13E-15 | -2.63127 | 1 | 1 RNU6-898P     | --     |
| ENSG00000202498 | 5.13E-15 | -2.63127 | 1 | 1 SNORD116      | --     |
| ENSG00000202499 | 5.13E-15 | -2.63127 | 1 | 1 SNORD115-36   | --     |
| ENSG00000202502 | 5.13E-15 | -2.63127 | 1 | 1 RNA5SP151     | --     |
| ENSG00000202503 | 5.13E-15 | -2.63127 | 1 | 1 SNORD34       | --     |
| ENSG00000202508 | 5.13E-15 | -2.63127 | 1 | 1 Y_RNA         | --     |
| ENSG00000202512 | 5.13E-15 | -2.63127 | 1 | 1 RN7SKP230     | --     |
| ENSG00000202513 | 5.13E-15 | -2.63127 | 1 | 1 RNU6-805P     | --     |
| ENSG00000202514 | 5.13E-15 | -2.63127 | 1 | 1 Y_RNA         | --     |
| ENSG00000202517 | 5.13E-15 | -2.63127 | 1 | 1 SNORA64       | --     |
| ENSG00000202521 | 5.13E-15 | -2.63127 | 1 | 1 RNA5S7        | --     |
| ENSG00000202523 | 5.13E-15 | -2.63127 | 1 | 1 Y_RNA         | --     |
| ENSG00000202526 | 5.13E-15 | -2.63127 | 1 | 1 RNA5S13       | --     |
| ENSG00000202528 | 5.13E-15 | -2.63127 | 1 | 1 RNU6-650P     | --     |
| ENSG00000202529 | 5.13E-15 | -2.63127 | 1 | 1 SNORD18B      | --     |
| ENSG00000202532 | 5.13E-15 | -2.63127 | 1 | 1 RNU6-395P     | --     |
| ENSG00000202533 | 5.13E-15 | -2.63127 | 1 | 1 Y_RNA         | --     |
| ENSG00000202534 | 5.13E-15 | -2.63127 | 1 | 1 RNU6-1329P    | --     |
| ENSG00000202536 | 5.13E-15 | -2.63127 | 1 | 1 Y_RNA         | --     |
| ENSG00000202542 | 5.13E-15 | -2.63127 | 1 | 1 Y_RNA         | --     |
| ENSG00000202560 | 5.13E-15 | -2.63127 | 1 | 1 MIR539        | --     |
| ENSG00000202566 | 5.13E-15 | -2.63127 | 1 | 1 MIR421        | --     |
| ENSG00000202569 | 5.13E-15 | -2.63127 | 1 | 1 MIR146B       | --     |
| ENSG00000202601 | 5.13E-15 | -2.63127 | 1 | 1 MIR582        | --     |
| ENSG00000202609 | 5.13E-15 | -2.63127 | 1 | 1 MIR488        | --     |
| ENSG00000203257 | 5.13E-15 | -2.63127 | 1 | 1 AL691479.1    | --     |
| ENSG00000203260 | 5.13E-15 | -2.63127 | 1 | 1 AL356475.1    | K15696 |
| ENSG00000203262 | 5.13E-15 | -2.63127 | 1 | 1 RP5-961K14.2  | K04613 |
| ENSG00000203266 | 5.13E-15 | -2.63127 | 1 | 1 RP11-560A15.3 | --     |
| ENSG00000203268 | 5.13E-15 | -2.63127 | 1 | 1 AL445199.1    | --     |
| ENSG00000203281 | 5.13E-15 | -2.63127 | 1 | 1 AL590489.1    | K08857 |
| ENSG00000203284 | 5.13E-15 | -2.63127 | 1 | 1 AL591516.1    | K11447 |
| ENSG00000203285 | 5.13E-15 | -2.63127 | 1 | 1 AL591516.2    | K11447 |
| ENSG00000203286 | 5.13E-15 | -2.63127 | 1 | 1 AL365202.1    | K12581 |
| ENSG00000203305 | 5.13E-15 | -2.63127 | 1 | 1 AC010525.1    | --     |
| ENSG00000203307 | 5.13E-15 | -2.63127 | 1 | 1 RP11-375H19.2 | --     |
| ENSG00000203314 | 5.13E-15 | -2.63127 | 1 | 1 AC015815.1    | K06588 |
| ENSG00000203316 | 5.13E-15 | -2.63127 | 1 | 1 AC015815.3    | --     |
| ENSG00000203317 | 5.13E-15 | -2.63127 | 1 | 1 AC015815.4    | --     |
| ENSG00000203318 | 5.13E-15 | -2.63127 | 1 | 1 AC015815.5    | --     |
| ENSG00000203326 | 5.13E-15 | -2.63127 | 1 | 1 ZNF525        | K09228 |
| ENSG00000203334 | 5.13E-15 | -2.63127 | 1 | 1 AP003027.1    | --     |
| ENSG00000203335 | 5.13E-15 | -2.63127 | 1 | 1 AC006019.3    | --     |
| ENSG00000203343 | 5.13E-15 | -2.63127 | 1 | 1 AC009107.1    | K09131 |
| ENSG00000203344 | 5.13E-15 | -2.63127 | 1 | 1 AC018696.2    | K17985 |
| ENSG00000203346 | 5.13E-15 | -2.63127 | 1 | 1 AL162458.1    | K16467 |
| ENSG00000203363 | 5.13E-15 | -2.63127 | 1 | 1 AC012454.4    | K08438 |
| ENSG00000203372 | 5.13E-15 | -2.63127 | 1 | 1 RP11-101E5.1  | --     |

|                 |          |          |   |                 |        |
|-----------------|----------|----------|---|-----------------|--------|
| ENSG00000203377 | 5.13E-15 | -2.63127 | 1 | 1 AC131568.1    | K09488 |
| ENSG00000203384 | 5.13E-15 | -2.63127 | 1 | 1 AL591516.3    | K17985 |
| ENSG00000203386 | 5.13E-15 | -2.63127 | 1 | 1 AC009499.1    | -      |
| ENSG00000203387 | 5.13E-15 | -2.63127 | 1 | 1 AC074019.2    | K12188 |
| ENSG00000203394 | 5.13E-15 | -2.63127 | 1 | 1 RP5-930J4.4   | -      |
| ENSG00000203395 | 5.13E-15 | -2.63127 | 1 | 1 AC015969.3    | -      |
| ENSG00000203396 | 5.13E-15 | -2.63127 | 1 | 1 RP11-217O12.1 | -      |
| ENSG00000203397 | 5.13E-15 | -2.63127 | 1 | 1 RP13-36G14.3  | K10135 |
| ENSG00000203400 | 5.13E-15 | -2.63127 | 1 | 1 AP001187.1    | K15696 |
| ENSG00000203402 | 5.13E-15 | -2.63127 | 1 | 1 RP11-571E6.3  | -      |
| ENSG00000203408 | 5.13E-15 | -2.63127 | 1 | 1 OR6C71P       | K04257 |
| ENSG00000203411 | 5.13E-15 | -2.63127 | 1 | 1 AC090519.2    | K16467 |
| ENSG00000203413 | 5.13E-15 | -2.63127 | 1 | 1 ACTBP6        | K05692 |
| ENSG00000203414 | 5.13E-15 | -2.63127 | 1 | 1 BTBD7P1       | K10479 |
| ENSG00000203415 | 5.13E-15 | -2.63127 | 1 | 1 AC016734.1    | K06115 |
| ENSG00000203416 | 5.13E-15 | -2.63127 | 1 | 1 FAM32B        | K13120 |
| ENSG00000203418 | 5.13E-15 | -2.63127 | 1 | 1 AC131571.1    | K17985 |
| ENSG00000203421 | 5.13E-15 | -2.63127 | 1 | 1 AC140061.2    | -      |
| ENSG00000203422 | 5.13E-15 | -2.63127 | 1 | 1 AC140061.3    | K10408 |
| ENSG00000203423 | 5.13E-15 | -2.63127 | 1 | 1 AC140061.4    | K09228 |
| ENSG00000203424 | 5.13E-15 | -2.63127 | 1 | 1 AC140061.5    | K09228 |
| ENSG00000203425 | 5.13E-15 | -2.63127 | 1 | 1 AC140061.6    | K06115 |
| ENSG00000203427 | 5.13E-15 | -2.63127 | 1 | 1 AC140061.8    | K15106 |
| ENSG00000203430 | 5.13E-15 | -2.63127 | 1 | 1 AC140061.10   | K17985 |
| ENSG00000203431 | 5.13E-15 | -2.63127 | 1 | 1 AC140061.11   | K09228 |
| ENSG00000203432 | 5.13E-15 | -2.63127 | 1 | 1 AC008147.1    | K09228 |
| ENSG00000203434 | 5.13E-15 | -2.63127 | 1 | 1 RP11-163F15.1 | -      |
| ENSG00000203435 | 5.13E-15 | -2.63127 | 1 | 1 AC104600.1    | K06620 |
| ENSG00000203436 | 5.13E-15 | -2.63127 | 1 | 1 AC109925.1    | K08857 |
| ENSG00000203437 | 5.13E-15 | -2.63127 | 1 | 1 RP11-820K3.3  | K03134 |
| ENSG00000203438 | 5.13E-15 | -2.63127 | 1 | 1 AL512625.1    | -      |
| ENSG00000203442 | 5.13E-15 | -2.63127 | 1 | 1 AC008555.1    | K17985 |
| ENSG00000203457 | 5.13E-15 | -2.63127 | 1 | 1 AC068896.1    | K06115 |
| ENSG00000203462 | 5.13E-15 | -2.63127 | 1 | 1 RP11-814E24.1 | -      |
| ENSG00000203465 | 5.13E-15 | -2.63127 | 1 | 1 AC061975.2    | K17985 |
| ENSG00000203469 | 5.13E-15 | -2.63127 | 1 | 1 RP5-1113E3.3  | -      |
| ENSG00000203471 | 5.13E-15 | -2.63127 | 1 | 1 AL359697.1    | -      |
| ENSG00000203472 | 5.13E-15 | -2.63127 | 1 | 1 RP11-77K12.4  | -      |
| ENSG00000203473 | 5.13E-15 | -2.63127 | 1 | 1 AC105036.1    | K09131 |
| ENSG00000203477 | 5.13E-15 | -2.63127 | 1 | 1 AC061975.3    | K06115 |
| ENSG00000203478 | 5.13E-15 | -2.63127 | 1 | 1 AC061975.4    | K12606 |
| ENSG00000203479 | 5.13E-15 | -2.63127 | 1 | 1 AC061975.5    | -      |
| ENSG00000203480 | 5.13E-15 | -2.63127 | 1 | 1 AC061975.6    | K12581 |
| ENSG00000203482 | 5.13E-15 | -2.63127 | 1 | 1 AC061975.7    | K12581 |
| ENSG00000203483 | 5.13E-15 | -2.63127 | 1 | 1 AC100852.1    | K12606 |
| ENSG00000203484 | 5.13E-15 | -2.63127 | 1 | 1 AC100852.2    | K01368 |
| ENSG00000203489 | 5.13E-15 | -2.63127 | 1 | 1 HMGB1P39      | K10802 |
| ENSG00000203492 | 5.13E-15 | -2.63127 | 1 | 1 OR2N1P        | K04257 |
| ENSG00000203496 | 5.13E-15 | -2.63127 | 1 | 1 RP11-291L22.4 | -      |
| ENSG00000203498 | 5.13E-15 | -2.63127 | 1 | 1 RP11-556O15.1 | -      |
| ENSG00000203504 | 5.13E-15 | -2.63127 | 1 | 1 AC131571.2    | K17985 |
| ENSG00000203505 | 5.13E-15 | -2.63127 | 1 | 1 AC003079.1    | K15696 |
| ENSG00000203506 | 5.13E-15 | -2.63127 | 1 | 1 RBMS3-AS2     | -      |
| ENSG00000203507 | 5.13E-15 | -2.63127 | 1 | 1 AC103801.1    | K09228 |
| ENSG00000203511 | 5.13E-15 | -2.63127 | 1 | 1 AL353662.1    | K01557 |
| ENSG00000203512 | 5.13E-15 | -2.63127 | 1 | 1 AL353662.2    | K12581 |
| ENSG00000203513 | 5.13E-15 | -2.63127 | 1 | 1 AL353662.3    | K15696 |
| ENSG00000203518 | 5.13E-15 | -2.63127 | 1 | 1 AL023807.1    | K12022 |

|                 |          |          |   |                 |        |
|-----------------|----------|----------|---|-----------------|--------|
| ENSG00000203527 | 5.13E-15 | -2.63127 | 1 | 1 Z99756.1      | -      |
| ENSG00000203531 | 5.13E-15 | -2.63127 | 1 | 1 AC016712.1    | K10069 |
| ENSG00000203543 | 5.13E-15 | -2.63127 | 1 | 1 AL353671.2    | K17985 |
| ENSG00000203547 | 5.13E-15 | -2.63127 | 1 | 1 AL135901.1    | K00779 |
| ENSG00000203560 | 5.13E-15 | -2.63127 | 1 | 1 OR52J1P       | K04257 |
| ENSG00000203562 | 5.13E-15 | -2.63127 | 1 | 1 AC004771.1    | -      |
| ENSG00000203565 | 5.13E-15 | -2.63127 | 1 | 1 RP13-259N13.2 | -      |
| ENSG00000203572 | 5.13E-15 | -2.63127 | 1 | 1 AC090519.3    | K07994 |
| ENSG00000203573 | 5.13E-15 | -2.63127 | 1 | 1 AC090519.4    | K08857 |
| ENSG00000203574 | 5.13E-15 | -2.63127 | 1 | 1 AC090519.5    | K02927 |
| ENSG00000203575 | 5.13E-15 | -2.63127 | 1 | 1 AC090519.6    | K17985 |
| ENSG00000203576 | 5.13E-15 | -2.63127 | 1 | 1 AC090519.7    | K12581 |
| ENSG00000203578 | 5.13E-15 | -2.63127 | 1 | 1 AC073940.1    | K09582 |
| ENSG00000203583 | 5.13E-15 | -2.63127 | 1 | 1 AL021707.1    | K09228 |
| ENSG00000203585 | 5.13E-15 | -2.63127 | 1 | 1 RP11-542B15.1 | -      |
| ENSG00000203593 | 5.13E-15 | -2.63127 | 1 | 1 RP5-1096D14.6 | -      |
| ENSG00000203594 | 5.13E-15 | -2.63127 | 1 | 1 AC116351.1    | K16467 |
| ENSG00000203601 | 5.13E-15 | -2.63127 | 1 | 1 LINC00970     | -      |
| ENSG00000203605 | 5.13E-15 | -2.63127 | 1 | 1 RP11-335E6.2  | -      |
| ENSG00000203606 | 5.13E-15 | -2.63127 | 1 | 1 AC004832.1    | -      |
| ENSG00000203614 | 5.13E-15 | -2.63127 | 1 | 1 AL512652.1    | K08857 |
| ENSG00000203616 | 5.13E-15 | -2.63127 | 1 | 1 RHOT1P2       | K07870 |
| ENSG00000203618 | 5.13E-15 | -2.63127 | 1 | 1 GP1BB         | K06262 |
| ENSG00000203620 | 5.13E-15 | -2.63127 | 1 | 1 RP11-84A19.2  | -      |
| ENSG00000203635 | 5.13E-15 | -2.63127 | 1 | 1 AC144450.2    | -      |
| ENSG00000203643 | 5.13E-15 | -2.63127 | 1 | 1 AC012456.3    | -      |
| ENSG00000203645 | 5.13E-15 | -2.63127 | 1 | 1 LINC00501     | -      |
| ENSG00000203647 | 5.13E-15 | -2.63127 | 1 | 1 AC106827.1    | -      |
| ENSG00000203648 | 5.13E-15 | -2.63127 | 1 | 1 AC007618.3    | K02991 |
| ENSG00000203650 | 5.13E-15 | -2.63127 | 1 | 1 RP4-562J12.2  | -      |
| ENSG00000203652 | 5.13E-15 | -2.63127 | 1 | 1 AC099048.1    | -      |
| ENSG00000203659 | 5.13E-15 | -2.63127 | 1 | 1 AL353671.3    | K17985 |
| ENSG00000203661 | 5.13E-15 | -2.63127 | 1 | 1 OR2T5         | K04257 |
| ENSG00000203663 | 5.13E-15 | -2.63127 | 1 | 1 OR2L2         | K04257 |
| ENSG00000203664 | 5.13E-15 | -2.63127 | 1 | 1 OR2W5         | K04257 |
| ENSG00000203685 | 5.13E-15 | -2.63127 | 1 | 1 C1orf95       | -      |
| ENSG00000203688 | 5.13E-15 | -2.63127 | 1 | 1 RP11-351J23.1 | -      |
| ENSG00000203690 | 5.13E-15 | -2.63127 | 1 | 1 TCP10         | -      |
| ENSG00000203691 | 5.13E-15 | -2.63127 | 1 | 1 AC092811.1    | -      |
| ENSG00000203710 | 5.13E-15 | -2.63127 | 1 | 1 CR1           | K04011 |
| ENSG00000203727 | 5.13E-15 | -2.63127 | 1 | 1 SAMD5         | K17985 |
| ENSG00000203729 | 5.13E-15 | -2.63127 | 1 | 1 LINC00272     | -      |
| ENSG00000203730 | 5.13E-15 | -2.63127 | 1 | 1 TEDDM1        | K06588 |
| ENSG00000203733 | 5.13E-15 | -2.63127 | 1 | 1 GJE1          | -      |
| ENSG00000203737 | 5.13E-15 | -2.63127 | 1 | 1 GPR52         | K08407 |
| ENSG00000203740 | 5.13E-15 | -2.63127 | 1 | 1 METTL11B      | K19579 |
| ENSG00000203747 | 5.13E-15 | -2.63127 | 1 | 1 FCGR3A        | K06463 |
| ENSG00000203756 | 5.13E-15 | -2.63127 | 1 | 1 TMEM244       | -      |
| ENSG00000203757 | 5.13E-15 | -2.63127 | 1 | 1 OR6K3         | K04257 |
| ENSG00000203758 | 5.13E-15 | -2.63127 | 1 | 1 OR10T1P       | K04257 |
| ENSG00000203778 | 5.13E-15 | -2.63127 | 1 | 1 FAM229B       | -      |
| ENSG00000203781 | 5.13E-15 | -2.63127 | 1 | 1 AL591704.9    | -      |
| ENSG00000203782 | 5.13E-15 | -2.63127 | 1 | 1 LOR           | K10385 |
| ENSG00000203783 | 5.13E-15 | -2.63127 | 1 | 1 PRR9          | -      |
| ENSG00000203784 | 5.13E-15 | -2.63127 | 1 | 1 LELP1         | -      |
| ENSG00000203786 | 5.13E-15 | -2.63127 | 1 | 1 KPRP          | -      |
| ENSG00000203795 | 5.13E-15 | -2.63127 | 1 | 1 FAM24A        | -      |
| ENSG00000203801 | 5.13E-15 | -2.63127 | 1 | 1 LINC00222     | -      |



|                 |          |          |   |                 |        |
|-----------------|----------|----------|---|-----------------|--------|
| ENSG00000203805 | 5.13E-15 | -2.63127 | 1 | 1 PPAPDC1A      | -      |
| ENSG00000203808 | 5.13E-15 | -2.63127 | 1 | 1 BVES-AS1      | -      |
| ENSG00000203809 | 5.13E-15 | -2.63127 | 1 | 1 LINC00577     | -      |
| ENSG00000203812 | 5.13E-15 | -2.63127 | 1 | 1 HIST2H2AA4    | K11251 |
| ENSG00000203815 | 5.13E-15 | -2.63127 | 1 | 1 FAM231D       | -      |
| ENSG00000203817 | 5.13E-15 | -2.63127 | 1 | 1 FAM72C        | -      |
| ENSG00000203818 | 5.13E-15 | -2.63127 | 1 | 1 HIST2H3PS2    | K11253 |
| ENSG00000203819 | 5.13E-15 | -2.63127 | 1 | 1 HIST2H2BC     | K11252 |
| ENSG00000203825 | 5.13E-15 | -2.63127 | 1 | 1 RP11-744H18.1 | K16549 |
| ENSG00000203835 | 5.13E-15 | -2.63127 | 1 | 1 ABHD17AP1     | -      |
| ENSG00000203837 | 5.13E-15 | -2.63127 | 1 | 1 PNLIPRP3      | K14076 |
| ENSG00000203855 | 5.13E-15 | -2.63127 | 1 | 1 HSD3BP4       | K00070 |
| ENSG00000203857 | 5.13E-15 | -2.63127 | 1 | 1 HSD3B1        | K00070 |
| ENSG00000203858 | 5.13E-15 | -2.63127 | 1 | 1 HSD3BP2       | K00070 |
| ENSG00000203859 | 5.13E-15 | -2.63127 | 1 | 1 HSD3B2        | K00070 |
| ENSG00000203864 | 5.13E-15 | -2.63127 | 1 | 1 C1orf137      | -      |
| ENSG00000203865 | 5.13E-15 | -2.63127 | 1 | 1 ATP1A1OS      | -      |
| ENSG00000203867 | 5.13E-15 | -2.63127 | 1 | 1 RBM20         | K12581 |
| ENSG00000203870 | 5.13E-15 | -2.63127 | 1 | 1 SMIM9         | -      |
| ENSG00000203871 | 5.13E-15 | -2.63127 | 1 | 1 C6orf164      | -      |
| ENSG00000203876 | 5.13E-15 | -2.63127 | 1 | 1 RP11-451M19.3 | -      |
| ENSG00000203877 | 5.13E-15 | -2.63127 | 1 | 1 RIPPLY2       | -      |
| ENSG00000203878 | 5.13E-15 | -2.63127 | 1 | 1 CHIAP2        | K01183 |
| ENSG00000203897 | 5.13E-15 | -2.63127 | 1 | 1 SPATA42       | -      |
| ENSG00000203902 | 5.13E-15 | -2.63127 | 1 | 1 PNMA6B        | -      |
| ENSG00000203907 | 5.13E-15 | -2.63127 | 1 | 1 OOEPE         | K17043 |
| ENSG00000203908 | 5.13E-15 | -2.63127 | 1 | 1 KHDC3L        | -      |
| ENSG00000203909 | 5.13E-15 | -2.63127 | 1 | 1 DPPA5         | -      |
| ENSG00000203914 | 5.13E-15 | -2.63127 | 1 | 1 HSP90B3P      | K09487 |
| ENSG00000203923 | 5.13E-15 | -2.63127 | 1 | 1 SPANXN1       | -      |
| ENSG00000203924 | 5.13E-15 | -2.63127 | 1 | 1 SPANXN2       | -      |
| ENSG00000203926 | 5.13E-15 | -2.63127 | 1 | 1 SPANXA2       | -      |
| ENSG00000203933 | 5.13E-15 | -2.63127 | 1 | 1 CXorf66       | -      |
| ENSG00000203952 | 5.13E-15 | -2.63127 | 1 | 1 CCDC160       | -      |
| ENSG00000203963 | 5.13E-15 | -2.63127 | 1 | 1 C1orf141      | K12795 |
| ENSG00000203970 | 5.13E-15 | -2.63127 | 1 | 1 DEFB110       | -      |
| ENSG00000203971 | 5.13E-15 | -2.63127 | 1 | 1 RP13-379L11.2 | -      |
| ENSG00000203972 | 5.13E-15 | -2.63127 | 1 | 1 GLYATL3       | -      |
| ENSG00000203985 | 5.13E-15 | -2.63127 | 1 | 1 LDLRAD1       | -      |
| ENSG00000203987 | 5.13E-15 | -2.63127 | 1 | 1 RP11-188C12.3 | -      |
| ENSG00000203989 | 5.13E-15 | -2.63127 | 1 | 1 RHOXF2B       | -      |
| ENSG00000204003 | 5.13E-15 | -2.63127 | 1 | 1 LCN6          | -      |
| ENSG00000204006 | 5.13E-15 | -2.63127 | 1 | 1 C1orf185      | -      |
| ENSG00000204007 | 5.13E-15 | -2.63127 | 1 | 1 GLT6D1        | -      |
| ENSG00000204020 | 5.13E-15 | -2.63127 | 1 | 1 LIPN          | -      |
| ENSG00000204021 | 5.13E-15 | -2.63127 | 1 | 1 LIPK          | K14452 |
| ENSG00000204022 | 5.13E-15 | -2.63127 | 1 | 1 LIPJ          | K14452 |
| ENSG00000204025 | 5.13E-15 | -2.63127 | 1 | 1 TRPC5OS       | -      |
| ENSG00000204031 | 5.13E-15 | -2.63127 | 1 | 1 LCN1P2        | -      |
| ENSG00000204033 | 5.13E-15 | -2.63127 | 1 | 1 LRIT2         | -      |
| ENSG00000204038 | 5.13E-15 | -2.63127 | 1 | 1 AL359195.1    | K01896 |
| ENSG00000204049 | 5.13E-15 | -2.63127 | 1 | 1 AL391421.1    | -      |
| ENSG00000204053 | 5.13E-15 | -2.63127 | 1 | 1 MYCLP1        | K09110 |
| ENSG00000204065 | 5.13E-15 | -2.63127 | 1 | 1 TCEAL5        | -      |
| ENSG00000204071 | 5.13E-15 | -2.63127 | 1 | 1 TCEAL6        | -      |
| ENSG00000204072 | 5.13E-15 | -2.63127 | 1 | 1 RP4-545K15.3  | -      |
| ENSG00000204086 | 5.13E-15 | -2.63127 | 1 | 1 RPA4          | K10741 |
| ENSG00000204091 | 5.13E-15 | -2.63127 | 1 | 1 TDRG1         | -      |

|                 |          |          |   |                 |        |
|-----------------|----------|----------|---|-----------------|--------|
| ENSG00000204092 | 5.13E-15 | -2.63127 | 1 | 1 LINC00951     | -      |
| ENSG00000204110 | 5.13E-15 | -2.63127 | 1 | 1 RP1-153P14.8  | -      |
| ENSG00000204116 | 5.13E-15 | -2.63127 | 1 | 1 CHIC1         | -      |
| ENSG00000204117 | 5.13E-15 | -2.63127 | 1 | 1 RP4-640H8.2   | -      |
| ENSG00000204118 | 5.13E-15 | -2.63127 | 1 | 1 NAP1L6        | K11280 |
| ENSG00000204119 | 5.13E-15 | -2.63127 | 1 | 1 LINC00684     | -      |
| ENSG00000204121 | 5.13E-15 | -2.63127 | 1 | 1 AC068134.5    | K09610 |
| ENSG00000204128 | 5.13E-15 | -2.63127 | 1 | 1 C2orf72       | -      |
| ENSG00000204131 | 5.13E-15 | -2.63127 | 1 | 1 NHSL2         | -      |
| ENSG00000204136 | 5.13E-15 | -2.63127 | 1 | 1 GGTA1P        | K00743 |
| ENSG00000204140 | 5.13E-15 | -2.63127 | 1 | 1 CLPSL1        | -      |
| ENSG00000204148 | 5.13E-15 | -2.63127 | 1 | 1 LINC00474     | -      |
| ENSG00000204161 | 5.13E-15 | -2.63127 | 1 | 1 C10orf128     | -      |
| ENSG00000204172 | 5.13E-15 | -2.63127 | 1 | 1 AGAP10        | K12491 |
| ENSG00000204175 | 5.13E-15 | -2.63127 | 1 | 1 GPRIN2        | -      |
| ENSG00000204176 | 5.13E-15 | -2.63127 | 1 | 1 SYT15         | -      |
| ENSG00000204179 | 5.13E-15 | -2.63127 | 1 | 1 PTPN20A       | K18039 |
| ENSG00000204183 | 5.13E-15 | -2.63127 | 1 | 1 GDF5OS        | K04664 |
| ENSG00000204187 | 5.13E-15 | -2.63127 | 1 | 1 LINC00619     | -      |
| ENSG00000204188 | 5.13E-15 | -2.63127 | 1 | 1 GGNBP1        | -      |
| ENSG00000204193 | 5.13E-15 | -2.63127 | 1 | 1 TXNDC8        | -      |
| ENSG00000204194 | 5.13E-15 | -2.63127 | 1 | 1 RPL12P1       | K02870 |
| ENSG00000204196 | 5.13E-15 | -2.63127 | 1 | 1 AC011737.2    | K02870 |
| ENSG00000204227 | 5.13E-15 | -2.63127 | 1 | 1 RING1         | K10695 |
| ENSG00000204228 | 5.13E-15 | -2.63127 | 1 | 1 HSD17B8       | K13370 |
| ENSG00000204231 | 5.13E-15 | -2.63127 | 1 | 1 RXRB          | K08525 |
| ENSG00000204246 | 5.13E-15 | -2.63127 | 1 | 1 OR13C3        | K04257 |
| ENSG00000204248 | 5.13E-15 | -2.63127 | 1 | 1 COL11A2       | K19721 |
| ENSG00000204250 | 5.13E-15 | -2.63127 | 1 | 1 LINC00587     | -      |
| ENSG00000204252 | 5.13E-15 | -2.63127 | 1 | 1 HLA-DOA       | K06752 |
| ENSG00000204257 | 5.13E-15 | -2.63127 | 1 | 1 HLA-DMA       | K06752 |
| ENSG00000204261 | 5.13E-15 | -2.63127 | 1 | 1 TAPSAR1       | -      |
| ENSG00000204264 | 5.13E-15 | -2.63127 | 1 | 1 PSMB8         | K02740 |
| ENSG00000204267 | 5.13E-15 | -2.63127 | 1 | 1 TAP2          | K05654 |
| ENSG00000204277 | 5.13E-15 | -2.63127 | 1 | 1 RP11-219G17.4 | -      |
| ENSG00000204278 | 5.13E-15 | -2.63127 | 1 | 1 TMEM235       | -      |
| ENSG00000204279 | 5.13E-15 | -2.63127 | 1 | 1 PAGE3         | -      |
| ENSG00000204283 | 5.13E-15 | -2.63127 | 1 | 1 FLJ45079      | -      |
| ENSG00000204287 | 5.13E-15 | -2.63127 | 1 | 1 HLA-DRA       | K06752 |
| ENSG00000204290 | 5.13E-15 | -2.63127 | 1 | 1 BTNL2         | -      |
| ENSG00000204293 | 5.13E-15 | -2.63127 | 1 | 1 OR8B2         | K04257 |
| ENSG00000204296 | 5.13E-15 | -2.63127 | 1 | 1 C6orf10       | -      |
| ENSG00000204300 | 5.13E-15 | -2.63127 | 1 | 1 TMEM225       | K17587 |
| ENSG00000204301 | 5.13E-15 | -2.63127 | 1 | 1 NOTCH4        | K02599 |
| ENSG00000204305 | 5.13E-15 | -2.63127 | 1 | 1 AGER          | K19722 |
| ENSG00000204306 | 5.13E-15 | -2.63127 | 1 | 1 AP002348.1    | -      |
| ENSG00000204308 | 5.13E-15 | -2.63127 | 1 | 1 RNF5          | K10666 |
| ENSG00000204314 | 5.13E-15 | -2.63127 | 1 | 1 PRRT1         | -      |
| ENSG00000204315 | 5.13E-15 | -2.63127 | 1 | 1 FKBPL         | K11095 |
| ENSG00000204334 | 5.13E-15 | -2.63127 | 1 | 1 ERICH2        | -      |
| ENSG00000204335 | 5.13E-15 | -2.63127 | 1 | 1 SP5           | K09195 |
| ENSG00000204338 | 5.13E-15 | -2.63127 | 1 | 1 CYP21A1P      | K00513 |
| ENSG00000204345 | 5.13E-15 | -2.63127 | 1 | 1 CD300LD       | K17557 |
| ENSG00000204347 | 5.13E-15 | -2.63127 | 1 | 1 BTBD17        | -      |
| ENSG00000204348 | 5.13E-15 | -2.63127 | 1 | 1 DXO           | K14845 |
| ENSG00000204351 | 5.13E-15 | -2.63127 | 1 | 1 SKIV2L        | K12599 |
| ENSG00000204352 | 5.13E-15 | -2.63127 | 1 | 1 C9orf129      | -      |
| ENSG00000204356 | 5.13E-15 | -2.63127 | 1 | 1 NELFE         | K15182 |

|                 |          |          |   |                    |        |
|-----------------|----------|----------|---|--------------------|--------|
| ENSG00000204361 | 5.13E-15 | -2.63127 | 1 | 1 NXPE2            | K09228 |
| ENSG00000204363 | 5.13E-15 | -2.63127 | 1 | 1 SPANXN5          | -      |
| ENSG00000204365 | 5.13E-15 | -2.63127 | 1 | 1 C10orf126        | -      |
| ENSG00000204366 | 5.13E-15 | -2.63127 | 1 | 1 ZBTB12           | K10499 |
| ENSG00000204368 | 5.13E-15 | -2.63127 | 1 | 1 RP11-552E4.3     | K15624 |
| ENSG00000204371 | 5.13E-15 | -2.63127 | 1 | 1 EHMT2            | K11420 |
| ENSG00000204375 | 5.13E-15 | -2.63127 | 1 | 1 XAGE1E           | -      |
| ENSG00000204376 | 5.13E-15 | -2.63127 | 1 | 1 XAGE1D           | -      |
| ENSG00000204379 | 5.13E-15 | -2.63127 | 1 | 1 XAGE1A           | -      |
| ENSG00000204381 | 5.13E-15 | -2.63127 | 1 | 1 LAYN             | K10077 |
| ENSG00000204382 | 5.13E-15 | -2.63127 | 1 | 1 XAGE1B           | -      |
| ENSG00000204385 | 5.13E-15 | -2.63127 | 1 | 1 SLC44A4          | K15377 |
| ENSG00000204386 | 5.13E-15 | -2.63127 | 1 | 1 NEU1             | K01186 |
| ENSG00000204389 | 5.13E-15 | -2.63127 | 1 | 1 HSPA1A           | K03283 |
| ENSG00000204390 | 5.13E-15 | -2.63127 | 1 | 1 HSPA1L           | K03283 |
| ENSG00000204392 | 5.13E-15 | -2.63127 | 1 | 1 LSM2             | K12621 |
| ENSG00000204393 | 5.13E-15 | -2.63127 | 1 | 1 RP11-410N8.4     | -      |
| ENSG00000204394 | 5.13E-15 | -2.63127 | 1 | 1 VARS             | K01873 |
| ENSG00000204398 | 5.13E-15 | -2.63127 | 1 | 1 RP11-65D24.2     | -      |
| ENSG00000204399 | 5.13E-15 | -2.63127 | 1 | 1 AC012306.2       | K06974 |
| ENSG00000204403 | 5.13E-15 | -2.63127 | 1 | 1 CASP12           | K04741 |
| ENSG00000204410 | 5.13E-15 | -2.63127 | 1 | 1 MSH5             | K08741 |
| ENSG00000204414 | 5.13E-15 | -2.63127 | 1 | 1 CSHL1            | K05438 |
| ENSG00000204420 | 5.13E-15 | -2.63127 | 1 | 1 C6orf25          | K02927 |
| ENSG00000204421 | 5.13E-15 | -2.63127 | 1 | 1 LY6G6C           | K06846 |
| ENSG00000204422 | 5.13E-15 | -2.63127 | 1 | 1 XXbac-BPG32J3.20 | K06846 |
| ENSG00000204424 | 5.13E-15 | -2.63127 | 1 | 1 LY6G6F           | -      |
| ENSG00000204427 | 5.13E-15 | -2.63127 | 1 | 1 ABHD16A          | -      |
| ENSG00000204428 | 5.13E-15 | -2.63127 | 1 | 1 LY6G5C           | -      |
| ENSG00000204429 | 5.13E-15 | -2.63127 | 1 | 1 RP11-1E11.1      | -      |
| ENSG00000204435 | 5.13E-15 | -2.63127 | 1 | 1 CSNK2B           | K03115 |
| ENSG00000204437 | 5.13E-15 | -2.63127 | 1 | 1 CTSLP6           | K01365 |
| ENSG00000204438 | 5.13E-15 | -2.63127 | 1 | 1 GPANK1           | -      |
| ENSG00000204439 | 5.13E-15 | -2.63127 | 1 | 1 C6orf47          | -      |
| ENSG00000204442 | 5.13E-15 | -2.63127 | 1 | 1 FAM155A          | -      |
| ENSG00000204444 | 5.13E-15 | -2.63127 | 1 | 1 APOM             | -      |
| ENSG00000204449 | 5.13E-15 | -2.63127 | 1 | 1 TRIM49C          | K12019 |
| ENSG00000204450 | 5.13E-15 | -2.63127 | 1 | 1 TRIM64           | K12019 |
| ENSG00000204455 | 5.13E-15 | -2.63127 | 1 | 1 TRIM51BP         | K12019 |
| ENSG00000204456 | 5.13E-15 | -2.63127 | 1 | 1 RP11-313I2.10    | K12019 |
| ENSG00000204460 | 5.13E-15 | -2.63127 | 1 | 1 AC079586.1       | -      |
| ENSG00000204466 | 5.13E-15 | -2.63127 | 1 | 1 DGKK             | -      |
| ENSG00000204469 | 5.13E-15 | -2.63127 | 1 | 1 PRRC2A           | -      |
| ENSG00000204471 | 5.13E-15 | -2.63127 | 1 | 1 TBC1D3P4         | K11837 |
| ENSG00000204472 | 5.13E-15 | -2.63127 | 1 | 1 AIF1             | K18617 |
| ENSG00000204475 | 5.13E-15 | -2.63127 | 1 | 1 NCR3             | K06743 |
| ENSG00000204478 | 5.13E-15 | -2.63127 | 1 | 1 PRAMEF20         | -      |
| ENSG00000204479 | 5.13E-15 | -2.63127 | 1 | 1 PRAMEF17         | -      |
| ENSG00000204480 | 5.13E-15 | -2.63127 | 1 | 1 PRAMEF19         | -      |
| ENSG00000204481 | 5.13E-15 | -2.63127 | 1 | 1 PRAMEF14         | -      |
| ENSG00000204482 | 5.13E-15 | -2.63127 | 1 | 1 LST1             | -      |
| ENSG00000204485 | 5.13E-15 | -2.63127 | 1 | 1 XX-FW84067D5.1   | -      |
| ENSG00000204486 | 5.13E-15 | -2.63127 | 1 | 1 PRAMEF21         | -      |
| ENSG00000204488 | 5.13E-15 | -2.63127 | 1 | 1 PRAMEF16         | -      |
| ENSG00000204491 | 5.13E-15 | -2.63127 | 1 | 1 PRAMEF18         | -      |
| ENSG00000204495 | 5.13E-15 | -2.63127 | 1 | 1 PRAMEF13         | -      |
| ENSG00000204498 | 5.13E-15 | -2.63127 | 1 | 1 NFKBIL1          | K09256 |
| ENSG00000204501 | 5.13E-15 | -2.63127 | 1 | 1 PRAMEF9          | -      |

|                 |          |          |   |                 |        |
|-----------------|----------|----------|---|-----------------|--------|
| ENSG00000204502 | 5.13E-15 | -2.63127 | 1 | 1 PRAMEF5       | -      |
| ENSG00000204503 | 5.13E-15 | -2.63127 | 1 | 1 PRAMEF3       | -      |
| ENSG00000204505 | 5.13E-15 | -2.63127 | 1 | 1 PRAMEF25      | -      |
| ENSG00000204508 | 5.13E-15 | -2.63127 | 1 | 1 PRAMEF22      | -      |
| ENSG00000204510 | 5.13E-15 | -2.63127 | 1 | 1 PRAMEF7       | -      |
| ENSG00000204511 | 5.13E-15 | -2.63127 | 1 | 1 MCCD1         | -      |
| ENSG00000204513 | 5.13E-15 | -2.63127 | 1 | 1 PRAMEF11      | -      |
| ENSG00000204516 | 5.13E-15 | -2.63127 | 1 | 1 MICB          | K09228 |
| ENSG00000204518 | 5.13E-15 | -2.63127 | 1 | 1 AADA4L4       | K14351 |
| ENSG00000204528 | 5.13E-15 | -2.63127 | 1 | 1 PSORS1C3      | -      |
| ENSG00000204531 | 5.13E-15 | -2.63127 | 1 | 1 POU5F1        | K09367 |
| ENSG00000204538 | 5.13E-15 | -2.63127 | 1 | 1 PSORS1C2      | -      |
| ENSG00000204539 | 5.13E-15 | -2.63127 | 1 | 1 CDSN          | -      |
| ENSG00000204542 | 5.13E-15 | -2.63127 | 1 | 1 C6orf15       | -      |
| ENSG00000204544 | 5.13E-15 | -2.63127 | 1 | 1 MUC21         | -      |
| ENSG00000204547 | 5.13E-15 | -2.63127 | 1 | 1 DEFB122       | -      |
| ENSG00000204548 | 5.13E-15 | -2.63127 | 1 | 1 DEFB121       | -      |
| ENSG00000204555 | 5.13E-15 | -2.63127 | 1 | 1 RP4-610C12.2  | K05031 |
| ENSG00000204556 | 5.13E-15 | -2.63127 | 1 | 1 CTD-2514C3.1  | K09228 |
| ENSG00000204560 | 5.13E-15 | -2.63127 | 1 | 1 DHX16         | K12813 |
| ENSG00000204564 | 5.13E-15 | -2.63127 | 1 | 1 C6orf136      | -      |
| ENSG00000204566 | 5.13E-15 | -2.63127 | 1 | 1 C10orf115     | -      |
| ENSG00000204568 | 5.13E-15 | -2.63127 | 1 | 1 MRPS18B       | K16174 |
| ENSG00000204569 | 5.13E-15 | -2.63127 | 1 | 1 PPP1R10       | -      |
| ENSG00000204571 | 5.13E-15 | -2.63127 | 1 | 1 KRTAP5-11     | -      |
| ENSG00000204572 | 5.13E-15 | -2.63127 | 1 | 1 KRTAP5-10     | -      |
| ENSG00000204574 | 5.13E-15 | -2.63127 | 1 | 1 ABCF1         | K06184 |
| ENSG00000204576 | 5.13E-15 | -2.63127 | 1 | 1 PRR3          | -      |
| ENSG00000204577 | 5.13E-15 | -2.63127 | 1 | 1 LILRB3        | K06512 |
| ENSG00000204590 | 5.13E-15 | -2.63127 | 1 | 1 GNL1          | -      |
| ENSG00000204592 | 5.13E-15 | -2.63127 | 1 | 1 HLA-E         | K06751 |
| ENSG00000204595 | 5.13E-15 | -2.63127 | 1 | 1 DPRX          | -      |
| ENSG00000204599 | 5.13E-15 | -2.63127 | 1 | 1 TRIM39        | K12015 |
| ENSG00000204603 | 5.13E-15 | -2.63127 | 1 | 1 RP11-638F5.1  | -      |
| ENSG00000204610 | 5.13E-15 | -2.63127 | 1 | 1 TRIM15        | K12005 |
| ENSG00000204612 | 5.13E-15 | -2.63127 | 1 | 1 FOXB2         | K09395 |
| ENSG00000204613 | 5.13E-15 | -2.63127 | 1 | 1 TRIM10        | K12002 |
| ENSG00000204614 | 5.13E-15 | -2.63127 | 1 | 1 TRIM40        | K12016 |
| ENSG00000204616 | 5.13E-15 | -2.63127 | 1 | 1 TRIM31        | K12011 |
| ENSG00000204618 | 5.13E-15 | -2.63127 | 1 | 1 RNF39         | -      |
| ENSG00000204619 | 5.13E-15 | -2.63127 | 1 | 1 PPP1R11       | K17553 |
| ENSG00000204620 | 5.13E-15 | -2.63127 | 1 | 1 AC115618.1    | K17985 |
| ENSG00000204622 | 5.13E-15 | -2.63127 | 1 | 1 HLA-J         | K06751 |
| ENSG00000204623 | 5.13E-15 | -2.63127 | 1 | 1 ZNRD1-AS1     | -      |
| ENSG00000204624 | 5.13E-15 | -2.63127 | 1 | 1 PTCHD2        | -      |
| ENSG00000204625 | 5.13E-15 | -2.63127 | 1 | 1 HCG9          | -      |
| ENSG00000204632 | 5.13E-15 | -2.63127 | 1 | 1 HLA-G         | K06751 |
| ENSG00000204637 | 5.13E-15 | -2.63127 | 1 | 1 AC068538.2    | -      |
| ENSG00000204640 | 5.13E-15 | -2.63127 | 1 | 1 NMS           | -      |
| ENSG00000204642 | 5.13E-15 | -2.63127 | 1 | 1 HLA-F         | K06751 |
| ENSG00000204644 | 5.13E-15 | -2.63127 | 1 | 1 ZFP57         | K09228 |
| ENSG00000204645 | 5.13E-15 | -2.63127 | 1 | 1 SSX4          | K15624 |
| ENSG00000204648 | 5.13E-15 | -2.63127 | 1 | 1 SSX9          | K15625 |
| ENSG00000204655 | 5.13E-15 | -2.63127 | 1 | 1 MOG           | K17270 |
| ENSG00000204657 | 5.13E-15 | -2.63127 | 1 | 1 OR2H2         | K04257 |
| ENSG00000204658 | 5.13E-15 | -2.63127 | 1 | 1 RP11-218C14.2 | K13905 |
| ENSG00000204661 | 5.13E-15 | -2.63127 | 1 | 1 C5orf60       | K16467 |
| ENSG00000204662 | 5.13E-15 | -2.63127 | 1 | 1 CST9LP1       | K13905 |

|                 |          |          |   |                 |        |
|-----------------|----------|----------|---|-----------------|--------|
| ENSG00000204663 | 5.13E-15 | -2.63127 | 1 | 1 CST13P        | -      |
| ENSG00000204669 | 5.13E-15 | -2.63127 | 1 | 1 C9orf57       | -      |
| ENSG00000204670 | 5.13E-15 | -2.63127 | 1 | 1 IGKV1OR2-3    | -      |
| ENSG00000204671 | 5.13E-15 | -2.63127 | 1 | 1 IL31          | -      |
| ENSG00000204677 | 5.13E-15 | -2.63127 | 1 | 1 FAM153C       | -      |
| ENSG00000204681 | 5.13E-15 | -2.63127 | 1 | 1 GABBR1        | K04615 |
| ENSG00000204683 | 5.13E-15 | -2.63127 | 1 | 1 C10orf113     | -      |
| ENSG00000204684 | 5.13E-15 | -2.63127 | 1 | 1 RP5-1004I9.1  | -      |
| ENSG00000204687 | 5.13E-15 | -2.63127 | 1 | 1 MAS1L         | K04324 |
| ENSG00000204688 | 5.13E-15 | -2.63127 | 1 | 1 OR2H1         | K04257 |
| ENSG00000204694 | 5.13E-15 | -2.63127 | 1 | 1 OR11A1        | K04257 |
| ENSG00000204695 | 5.13E-15 | -2.63127 | 1 | 1 OR14J1        | K04257 |
| ENSG00000204697 | 5.13E-15 | -2.63127 | 1 | 1 OR2U1P        | K04257 |
| ENSG00000204699 | 5.13E-15 | -2.63127 | 1 | 1 UBTFL3        | -      |
| ENSG00000204700 | 5.13E-15 | -2.63127 | 1 | 1 OR2J2         | K04257 |
| ENSG00000204701 | 5.13E-15 | -2.63127 | 1 | 1 OR2J3         | K04257 |
| ENSG00000204702 | 5.13E-15 | -2.63127 | 1 | 1 OR2J1         | K04257 |
| ENSG00000204703 | 5.13E-15 | -2.63127 | 1 | 1 OR2B3         | K04257 |
| ENSG00000204704 | 5.13E-15 | -2.63127 | 1 | 1 OR2W1         | K04257 |
| ENSG00000204705 | 5.13E-15 | -2.63127 | 1 | 1 UBTFL5        | K12606 |
| ENSG00000204706 | 5.13E-15 | -2.63127 | 1 | 1 MAMDC2-AS1    | -      |
| ENSG00000204709 | 5.13E-15 | -2.63127 | 1 | 1 C6orf100      | -      |
| ENSG00000204713 | 5.13E-15 | -2.63127 | 1 | 1 TRIM27        | K12009 |
| ENSG00000204717 | 5.13E-15 | -2.63127 | 1 | 1 AC073464.11   | K17299 |
| ENSG00000204718 | 5.13E-15 | -2.63127 | 1 | 1 CNN2P12       | K15411 |
| ENSG00000204740 | 5.13E-15 | -2.63127 | 1 | 1 MALRD1        | K11299 |
| ENSG00000204752 | 5.13E-15 | -2.63127 | 1 | 1 AC025278.1    | K17985 |
| ENSG00000204754 | 5.13E-15 | -2.63127 | 1 | 1 CTC-281M20.1  | -      |
| ENSG00000204767 | 5.13E-15 | -2.63127 | 1 | 1 FAM196B       | -      |
| ENSG00000204776 | 5.13E-15 | -2.63127 | 1 | 1 IGKV1OR-3     | -      |
| ENSG00000204779 | 5.13E-15 | -2.63127 | 1 | 1 FOXD4L5       | K09397 |
| ENSG00000204780 | 5.13E-15 | -2.63127 | 1 | 1 IGKV1OR9-1    | -      |
| ENSG00000204787 | 5.13E-15 | -2.63127 | 1 | 1 REG1P         | -      |
| ENSG00000204788 | 5.13E-15 | -2.63127 | 1 | 1 CR769776.1    | -      |
| ENSG00000204789 | 5.13E-15 | -2.63127 | 1 | 1 ZNF204P       | K09228 |
| ENSG00000204791 | 5.13E-15 | -2.63127 | 1 | 1 CTD-3065J16.6 | -      |
| ENSG00000204794 | 5.13E-15 | -2.63127 | 1 | 1 PGM5P1        | K15636 |
| ENSG00000204801 | 5.13E-15 | -2.63127 | 1 | 1 RP11-96J15.2  | K04358 |
| ENSG00000204802 | 5.13E-15 | -2.63127 | 1 | 1 RP11-111F5.4  | -      |
| ENSG00000204807 | 5.13E-15 | -2.63127 | 1 | 1 FAM27E2       | -      |
| ENSG00000204813 | 5.13E-15 | -2.63127 | 1 | 1 RP11-34H11.3  | -      |
| ENSG00000204814 | 5.13E-15 | -2.63127 | 1 | 1 RP11-160N1.10 | -      |
| ENSG00000204815 | 5.13E-15 | -2.63127 | 1 | 1 TTC25         | -      |
| ENSG00000204816 | 5.13E-15 | -2.63127 | 1 | 1 RP11-475I24.1 | K04358 |
| ENSG00000204818 | 5.13E-15 | -2.63127 | 1 | 1 BX649563.4    | K08458 |
| ENSG00000204828 | 5.13E-15 | -2.63127 | 1 | 1 FOXD4L2       | K09397 |
| ENSG00000204832 | 5.13E-15 | -2.63127 | 1 | 1 ST8SIA6-AS1   | -      |
| ENSG00000204844 | 5.13E-15 | -2.63127 | 1 | 1 FAM74A3       | -      |
| ENSG00000204848 | 5.13E-15 | -2.63127 | 1 | 1 SPATA31A2     | -      |
| ENSG00000204849 | 5.13E-15 | -2.63127 | 1 | 1 SPATA31A1     | -      |
| ENSG00000204850 | 5.13E-15 | -2.63127 | 1 | 1 AC011484.1    | K02183 |
| ENSG00000204851 | 5.13E-15 | -2.63127 | 1 | 1 PNMAL2        | K02183 |
| ENSG00000204860 | 5.13E-15 | -2.63127 | 1 | 1 FAM201A       | -      |
| ENSG00000204872 | 5.13E-15 | -2.63127 | 1 | 1 AC092653.5    | -      |
| ENSG00000204873 | 5.13E-15 | -2.63127 | 1 | 1 KRTAP9-3      | -      |
| ENSG00000204880 | 5.13E-15 | -2.63127 | 1 | 1 KRTAP4-8      | -      |
| ENSG00000204887 | 5.13E-15 | -2.63127 | 1 | 1 KRTAP1-4      | -      |
| ENSG00000204889 | 5.13E-15 | -2.63127 | 1 | 1 KRT40         | K07604 |

|                 |          |          |   |                 |        |
|-----------------|----------|----------|---|-----------------|--------|
| ENSG00000204897 | 5.13E-15 | -2.63127 | 1 | 1 KRT25         | K07604 |
| ENSG00000204904 | 5.13E-15 | -2.63127 | 1 | 1 CXorf31       | K12756 |
| ENSG00000204909 | 5.13E-15 | -2.63127 | 1 | 1 SPINK9        | -      |
| ENSG00000204915 | 5.13E-15 | -2.63127 | 1 | 1 RP6-99M1.1    | -      |
| ENSG00000204918 | 5.13E-15 | -2.63127 | 1 | 1 PRR20B        | -      |
| ENSG00000204919 | 5.13E-15 | -2.63127 | 1 | 1 PRR20A        | -      |
| ENSG00000204930 | 5.13E-15 | -2.63127 | 1 | 1 FAM221B       | K09654 |
| ENSG00000204933 | 5.13E-15 | -2.63127 | 1 | 1 CD177P1       | K06552 |
| ENSG00000204934 | 5.13E-15 | -2.63127 | 1 | 1 ATP6V0E2-AS1  | -      |
| ENSG00000204950 | 5.13E-15 | -2.63127 | 1 | 1 LRRC10B       | -      |
| ENSG00000204952 | 5.13E-15 | -2.63127 | 1 | 1 FBXO47        | K10321 |
| ENSG00000204960 | 5.13E-15 | -2.63127 | 1 | 1 BLACE         | -      |
| ENSG00000204961 | 5.13E-15 | -2.63127 | 1 | 1 PCDHA9        | K16493 |
| ENSG00000204962 | 5.13E-15 | -2.63127 | 1 | 1 PCDHA8        | K16493 |
| ENSG00000204963 | 5.13E-15 | -2.63127 | 1 | 1 PCDHA7        | K16493 |
| ENSG00000204965 | 5.13E-15 | -2.63127 | 1 | 1 PCDHA5        | K16493 |
| ENSG00000204967 | 5.13E-15 | -2.63127 | 1 | 1 PCDHA4        | K16493 |
| ENSG00000204969 | 5.13E-15 | -2.63127 | 1 | 1 PCDHA2        | K16493 |
| ENSG00000204970 | 5.13E-15 | -2.63127 | 1 | 1 PCDHA1        | K16493 |
| ENSG00000204971 | 5.13E-15 | -2.63127 | 1 | 1 RP11-807H22.7 | -      |
| ENSG00000204978 | 5.13E-15 | -2.63127 | 1 | 1 C19orf69      | -      |
| ENSG00000204979 | 5.13E-15 | -2.63127 | 1 | 1 MS4A13        | -      |
| ENSG00000204983 | 5.13E-15 | -2.63127 | 1 | 1 PRSS1         | K01312 |
| ENSG00000204989 | 5.13E-15 | -2.63127 | 1 | 1 OR4D8P        | K04257 |
| ENSG00000204990 | 5.13E-15 | -2.63127 | 1 | 1 RP5-842K16.1  | -      |
| ENSG00000204993 | 5.13E-15 | -2.63127 | 1 | 1 AC139712.2    | K15309 |
| ENSG00000205020 | 5.13E-15 | -2.63127 | 1 | 1 CCL4L1        | K12964 |
| ENSG00000205021 | 5.13E-15 | -2.63127 | 1 | 1 CCL3L1        | K05408 |
| ENSG00000205025 | 5.13E-15 | -2.63127 | 1 | 1 OR5G5P        | K04257 |
| ENSG00000205029 | 5.13E-15 | -2.63127 | 1 | 1 OR5D16        | K04257 |
| ENSG00000205030 | 5.13E-15 | -2.63127 | 1 | 1 OR5L2         | K04257 |
| ENSG00000205035 | 5.13E-15 | -2.63127 | 1 | 1 RP11-707M1.1  | K04604 |
| ENSG00000205037 | 5.13E-15 | -2.63127 | 1 | 1 RP11-863P13.4 | -      |
| ENSG00000205038 | 5.13E-15 | -2.63127 | 1 | 1 PKHD1L1       | -      |
| ENSG00000205044 | 5.13E-15 | -2.63127 | 1 | 1 RP11-56P9.11  | K12019 |
| ENSG00000205045 | 5.13E-15 | -2.63127 | 1 | 1 SLFN12L       | -      |
| ENSG00000205054 | 5.13E-15 | -2.63127 | 1 | 1 LINC01121     | -      |
| ENSG00000205056 | 5.13E-15 | -2.63127 | 1 | 1 RP11-693J15.5 | -      |
| ENSG00000205057 | 5.13E-15 | -2.63127 | 1 | 1 CLLU1OS       | -      |
| ENSG00000205076 | 5.13E-15 | -2.63127 | 1 | 1 LGALS7        | K10092 |
| ENSG00000205078 | 5.13E-15 | -2.63127 | 1 | 1 SYCE1L        | K19534 |
| ENSG00000205081 | 5.13E-15 | -2.63127 | 1 | 1 CXorf30       | -      |
| ENSG00000205097 | 5.13E-15 | -2.63127 | 1 | 1 FRG2          | K09131 |
| ENSG00000205100 | 5.13E-15 | -2.63127 | 1 | 1 HSP90AA4P     | K04079 |
| ENSG00000205105 | 5.13E-15 | -2.63127 | 1 | 1 COX17P1       | K02260 |
| ENSG00000205116 | 5.13E-15 | -2.63127 | 1 | 1 TMEM88B       | -      |
| ENSG00000205126 | 5.13E-15 | -2.63127 | 1 | 1 ACCSL         | -      |
| ENSG00000205148 | 5.13E-15 | -2.63127 | 1 | 1 AC016251.1    | -      |
| ENSG00000205174 | 5.13E-15 | -2.63127 | 1 | 1 C7orf66       | -      |
| ENSG00000205176 | 5.13E-15 | -2.63127 | 1 | 1 REXO1L1P      | K14570 |
| ENSG00000205184 | 5.13E-15 | -2.63127 | 1 | 1 SLC10A5P1     | K14343 |
| ENSG00000205186 | 5.13E-15 | -2.63127 | 1 | 1 FABP9         | -      |
| ENSG00000205212 | 5.13E-15 | -2.63127 | 1 | 1 CCDC144NL     | -      |
| ENSG00000205215 | 5.13E-15 | -2.63127 | 1 | 1 AC015818.3    | K07604 |
| ENSG00000205231 | 5.13E-15 | -2.63127 | 1 | 1 TTLL10-AS1    | -      |
| ENSG00000205240 | 5.13E-15 | -2.63127 | 1 | 1 OR7E36P       | K04257 |
| ENSG00000205266 | 5.13E-15 | -2.63127 | 1 | 1 AL353997.3    | -      |
| ENSG00000205267 | 5.13E-15 | -2.63127 | 1 | 1 DGAT2L7P      | K14457 |

|                 |          |          |   |                 |        |
|-----------------|----------|----------|---|-----------------|--------|
| ENSG00000205271 | 5.13E-15 | -2.63127 | 1 | 1 CSPG4P10      | K08115 |
| ENSG00000205279 | 5.13E-15 | -2.63127 | 1 | 1 CTXN3         | –      |
| ENSG00000205301 | 5.13E-15 | -2.63127 | 1 | 1 RP11-542P2.1  | K00738 |
| ENSG00000205307 | 5.13E-15 | -2.63127 | 1 | 1 SAP25         | K19193 |
| ENSG00000205312 | 5.13E-15 | -2.63127 | 1 | 1 AC022596.2    | K07604 |
| ENSG00000205318 | 5.13E-15 | -2.63127 | 1 | 1 GCNT6         | K00742 |
| ENSG00000205327 | 5.13E-15 | -2.63127 | 1 | 1 OR6C68        | K04257 |
| ENSG00000205328 | 5.13E-15 | -2.63127 | 1 | 1 OR6C65        | K04257 |
| ENSG00000205329 | 5.13E-15 | -2.63127 | 1 | 1 OR6C3         | K04257 |
| ENSG00000205330 | 5.13E-15 | -2.63127 | 1 | 1 OR6C1         | K04257 |
| ENSG00000205331 | 5.13E-15 | -2.63127 | 1 | 1 OR6C72P       | K04257 |
| ENSG00000205333 | 5.13E-15 | -2.63127 | 1 | 1 GOLGA2P1      | K10595 |
| ENSG00000205358 | 5.13E-15 | -2.63127 | 1 | 1 MT1H          | K14739 |
| ENSG00000205359 | 5.13E-15 | -2.63127 | 1 | 1 SLCO6A1       | K14357 |
| ENSG00000205360 | 5.13E-15 | -2.63127 | 1 | 1 MT1CP         | K14739 |
| ENSG00000205362 | 5.13E-15 | -2.63127 | 1 | 1 MT1A          | K14739 |
| ENSG00000205363 | 5.13E-15 | -2.63127 | 1 | 1 C15orf59      | –      |
| ENSG00000205364 | 5.13E-15 | -2.63127 | 1 | 1 MT1M          | K14739 |
| ENSG00000205396 | 5.13E-15 | -2.63127 | 1 | 1 LINC00661     | –      |
| ENSG00000205409 | 5.13E-15 | -2.63127 | 1 | 1 OR52E6        | K04257 |
| ENSG00000205412 | 5.13E-15 | -2.63127 | 1 | 1 HNRNPA1P20    | K12741 |
| ENSG00000205414 | 5.13E-15 | -2.63127 | 1 | 1 RP11-401P9.6  | –      |
| ENSG00000205424 | 5.13E-15 | -2.63127 | 1 | 1 AL592528.1    | –      |
| ENSG00000205433 | 5.13E-15 | -2.63127 | 1 | 1 SNRPGP6       | K11099 |
| ENSG00000205439 | 5.13E-15 | -2.63127 | 1 | 1 KRTAP12-3     | –      |
| ENSG00000205441 | 5.13E-15 | -2.63127 | 1 | 1 KRTAP10-7     | –      |
| ENSG00000205442 | 5.13E-15 | -2.63127 | 1 | 1 IZUMO3        | –      |
| ENSG00000205444 | 5.13E-15 | -2.63127 | 1 | 1 RP4-529N6.1   | –      |
| ENSG00000205445 | 5.13E-15 | -2.63127 | 1 | 1 KRTAP10-2     | –      |
| ENSG00000205449 | 5.13E-15 | -2.63127 | 1 | 1 NBPF22P       | –      |
| ENSG00000205452 | 5.13E-15 | -2.63127 | 1 | 1 RP11-812E19.3 | –      |
| ENSG00000205456 | 5.13E-15 | -2.63127 | 1 | 1 TP53TG3D      | –      |
| ENSG00000205457 | 5.13E-15 | -2.63127 | 1 | 1 TP53TG3C      | –      |
| ENSG00000205488 | 5.13E-15 | -2.63127 | 1 | 1 CALML3-AS1    | –      |
| ENSG00000205494 | 5.13E-15 | -2.63127 | 1 | 1 OR52A4        | K04257 |
| ENSG00000205495 | 5.13E-15 | -2.63127 | 1 | 1 OR52J3        | K04257 |
| ENSG00000205496 | 5.13E-15 | -2.63127 | 1 | 1 OR51A2        | K04257 |
| ENSG00000205497 | 5.13E-15 | -2.63127 | 1 | 1 OR51A4        | K04257 |
| ENSG00000205502 | 5.13E-15 | -2.63127 | 1 | 1 C2CD4B        | –      |
| ENSG00000205505 | 5.13E-15 | -2.63127 | 1 | 1 AC006014.10   | K08694 |
| ENSG00000205506 | 5.13E-15 | -2.63127 | 1 | 1 AC004878.6    | K08694 |
| ENSG00000205508 | 5.13E-15 | -2.63127 | 1 | 1 AC004878.5    | K08694 |
| ENSG00000205509 | 5.13E-15 | -2.63127 | 1 | 1 AC138783.11   | K08694 |
| ENSG00000205549 | 5.13E-15 | -2.63127 | 1 | 1 C9orf92       | –      |
| ENSG00000205562 | 5.13E-15 | -2.63127 | 1 | 1 RP11-497E19.1 | –      |
| ENSG00000205565 | 5.13E-15 | -2.63127 | 1 | 1 RP11-497H16.6 | –      |
| ENSG00000205579 | 5.13E-15 | -2.63127 | 1 | 1 DYNLL1P1      | K10418 |
| ENSG00000205580 | 5.13E-15 | -2.63127 | 1 | 1 AC006995.8    | K08694 |
| ENSG00000205584 | 5.13E-15 | -2.63127 | 1 | 1 AC005488.11   | K09572 |
| ENSG00000205596 | 5.13E-15 | -2.63127 | 1 | 1 RP5-1132H15.2 | –      |
| ENSG00000205611 | 5.13E-15 | -2.63127 | 1 | 1 RP4-610C12.4  | –      |
| ENSG00000205625 | 5.13E-15 | -2.63127 | 1 | 1 RP11-15G8.1   | K17985 |
| ENSG00000205628 | 5.13E-15 | -2.63127 | 1 | 1 GS1-179L18.1  | –      |
| ENSG00000205632 | 5.13E-15 | -2.63127 | 1 | 1 WI2-81516E3.1 | –      |
| ENSG00000205634 | 5.13E-15 | -2.63127 | 1 | 1 LINC00898     | –      |
| ENSG00000205636 | 5.13E-15 | -2.63127 | 1 | 1 LINC00583     | –      |
| ENSG00000205642 | 5.13E-15 | -2.63127 | 1 | 1 VCX3B         | –      |
| ENSG00000205649 | 5.13E-15 | -2.63127 | 1 | 1 HTN3          | K13913 |

|                 |          |          |   |                 |        |
|-----------------|----------|----------|---|-----------------|--------|
| ENSG00000205653 | 5.13E-15 | -2.63127 | 1 | 1 RP3-416J7.5   | -      |
| ENSG00000205662 | 5.13E-15 | -2.63127 | 1 | 1 RP11-706O15.7 | -      |
| ENSG00000205667 | 5.13E-15 | -2.63127 | 1 | 1 ARSH          | K12374 |
| ENSG00000205669 | 5.13E-15 | -2.63127 | 1 | 1 ACOT6         | K11993 |
| ENSG00000205678 | 5.13E-15 | -2.63127 | 1 | 1 TECRL         | -      |
| ENSG00000205682 | 5.13E-15 | -2.63127 | 1 | 1 RP11-798L4.1  | -      |
| ENSG00000205695 | 5.13E-15 | -2.63127 | 1 | 1 RP11-15H7.2   | -      |
| ENSG00000205716 | 5.13E-15 | -2.63127 | 1 | 1 AC007248.6    | -      |
| ENSG00000205718 | 5.13E-15 | -2.63127 | 1 | 1 MBD3L4        | -      |
| ENSG00000205740 | 5.13E-15 | -2.63127 | 1 | 1 AL359878.1    | K12581 |
| ENSG00000205745 | 5.13E-15 | -2.63127 | 1 | 1 PP13004       | -      |
| ENSG00000205754 | 5.13E-15 | -2.63127 | 1 | 1 SLCO1B7       | K05043 |
| ENSG00000205767 | 5.13E-15 | -2.63127 | 1 | 1 CTD-2302E22.1 | K02910 |
| ENSG00000205775 | 5.13E-15 | -2.63127 | 1 | 1 GAGE2E        | -      |
| ENSG00000205777 | 5.13E-15 | -2.63127 | 1 | 1 GAGE1         | K10408 |
| ENSG00000205786 | 5.13E-15 | -2.63127 | 1 | 1 AC002511.1    | -      |
| ENSG00000205795 | 5.13E-15 | -2.63127 | 1 | 1 CYS1          | -      |
| ENSG00000205821 | 5.13E-15 | -2.63127 | 1 | 1 AC006435.1    | -      |
| ENSG00000205822 | 5.13E-15 | -2.63127 | 1 | 1 TPTE2P6       | K17985 |
| ENSG00000205830 | 5.13E-15 | -2.63127 | 1 | 1 AC024132.1    | -      |
| ENSG00000205835 | 5.13E-15 | -2.63127 | 1 | 1 GMNC          | -      |
| ENSG00000205837 | 5.13E-15 | -2.63127 | 1 | 1 LINC00487     | -      |
| ENSG00000205846 | 5.13E-15 | -2.63127 | 1 | 1 CLEC6A        | K17514 |
| ENSG00000205847 | 5.13E-15 | -2.63127 | 1 | 1 OR7E91P       | K04257 |
| ENSG00000205850 | 5.13E-15 | -2.63127 | 1 | 1 AL359736.1    | -      |
| ENSG00000205856 | 5.13E-15 | -2.63127 | 1 | 1 C22orf42      | -      |
| ENSG00000205857 | 5.13E-15 | -2.63127 | 1 | 1 NANOGNB       | K17985 |
| ENSG00000205858 | 5.13E-15 | -2.63127 | 1 | 1 LRRC72        | -      |
| ENSG00000205864 | 5.13E-15 | -2.63127 | 1 | 1 KRTAP5-6      | -      |
| ENSG00000205865 | 5.13E-15 | -2.63127 | 1 | 1 FAM99B        | -      |
| ENSG00000205866 | 5.13E-15 | -2.63127 | 1 | 1 FAM99A        | -      |
| ENSG00000205879 | 5.13E-15 | -2.63127 | 1 | 1 FAM90A2P      | -      |
| ENSG00000205882 | 5.13E-15 | -2.63127 | 1 | 1 DEFB134       | -      |
| ENSG00000205883 | 5.13E-15 | -2.63127 | 1 | 1 DEFB135       | -      |
| ENSG00000205884 | 5.13E-15 | -2.63127 | 1 | 1 DEFB136       | -      |
| ENSG00000205897 | 5.13E-15 | -2.63127 | 1 | 1 OR7E136P      | K04257 |
| ENSG00000205899 | 5.13E-15 | -2.63127 | 1 | 1 BHLHA9        | -      |
| ENSG00000205916 | 5.13E-15 | -2.63127 | 1 | 1 DAZ4          | -      |
| ENSG00000205923 | 5.13E-15 | -2.63127 | 1 | 1 CEMP1         | K01443 |
| ENSG00000205927 | 5.13E-15 | -2.63127 | 1 | 1 OLIG2         | K09085 |
| ENSG00000205929 | 5.13E-15 | -2.63127 | 1 | 1 C21orf62      | -      |
| ENSG00000205930 | 5.13E-15 | -2.63127 | 1 | 1 C21orf49      | -      |
| ENSG00000205936 | 5.13E-15 | -2.63127 | 1 | 1 PPP1R12BP2    | K12329 |
| ENSG00000205940 | 5.13E-15 | -2.63127 | 1 | 1 HSP90AB2P     | K04079 |
| ENSG00000205944 | 5.13E-15 | -2.63127 | 1 | 1 DAZ2          | -      |
| ENSG00000205946 | 5.13E-15 | -2.63127 | 1 | 1 USP17L6P      | K11845 |
| ENSG00000205955 | 5.13E-15 | -2.63127 | 1 | 1 HSP90AA5P     | K04079 |
| ENSG00000205971 | 5.13E-15 | -2.63127 | 1 | 1 AC074389.6    | K19720 |
| ENSG00000205976 | 5.13E-15 | -2.63127 | 1 | 1 RP11-404K5.2  | -      |
| ENSG00000205989 | 5.13E-15 | -2.63127 | 1 | 1 DEFB109       | -      |
| ENSG00000206014 | 5.13E-15 | -2.63127 | 1 | 1 OR7E161P      | K04257 |
| ENSG00000206026 | 5.13E-15 | -2.63127 | 1 | 1 SMIM21        | -      |
| ENSG00000206034 | 5.13E-15 | -2.63127 | 1 | 1 DEFB109P1B    | -      |
| ENSG00000206042 | 5.13E-15 | -2.63127 | 1 | 1 DEFA7P        | K05230 |
| ENSG00000206043 | 5.13E-15 | -2.63127 | 1 | 1 C18orf63      | -      |
| ENSG00000206047 | 5.13E-15 | -2.63127 | 1 | 1 DEFA1         | K05230 |
| ENSG00000206052 | 5.13E-15 | -2.63127 | 1 | 1 DOK6          | -      |
| ENSG00000206062 | 5.13E-15 | -2.63127 | 1 | 1 RP13-212L9.1  | -      |



|                 |          |          |   |                 |        |
|-----------------|----------|----------|---|-----------------|--------|
| ENSG00000206066 | 5.13E-15 | -2.63127 | 1 | 1 IGLL3P        | K06554 |
| ENSG00000206069 | 5.13E-15 | -2.63127 | 1 | 1 TMEM211       | -      |
| ENSG00000206072 | 5.13E-15 | -2.63127 | 1 | 1 SERPINB11     | K13966 |
| ENSG00000206102 | 5.13E-15 | -2.63127 | 1 | 1 KRTAP19-8     | -      |
| ENSG00000206104 | 5.13E-15 | -2.63127 | 1 | 1 KRTAP20-3     | -      |
| ENSG00000206105 | 5.13E-15 | -2.63127 | 1 | 1 KRTAP20-4     | -      |
| ENSG00000206106 | 5.13E-15 | -2.63127 | 1 | 1 KRTAP22-2     | -      |
| ENSG00000206107 | 5.13E-15 | -2.63127 | 1 | 1 KRTAP27-1     | -      |
| ENSG00000206113 | 5.13E-15 | -2.63127 | 1 | 1 RP11-503N18.1 | -      |
| ENSG00000206114 | 5.13E-15 | -2.63127 | 1 | 1 FAM138D       | -      |
| ENSG00000206120 | 5.13E-15 | -2.63127 | 1 | 1 EGFEM1P       | -      |
| ENSG00000206129 | 5.13E-15 | -2.63127 | 1 | 1 CTD-2008L17.2 | -      |
| ENSG00000206144 | 5.13E-15 | -2.63127 | 1 | 1 RP11-400K9.2  | K06855 |
| ENSG00000206147 | 5.13E-15 | -2.63127 | 1 | 1 RP11-106A1.2  | K02893 |
| ENSG00000206150 | 5.13E-15 | -2.63127 | 1 | 1 RNASE13       | -      |
| ENSG00000206159 | 5.13E-15 | -2.63127 | 1 | 1 GYG2P1        | K00750 |
| ENSG00000206177 | 5.13E-15 | -2.63127 | 1 | 1 HBM           | K13828 |
| ENSG00000206187 | 5.13E-15 | -2.63127 | 1 | 1 RP11-1084I9.1 | -      |
| ENSG00000206192 | 5.13E-15 | -2.63127 | 1 | 1 ANKRD20A9P    | K17299 |
| ENSG00000206199 | 5.13E-15 | -2.63127 | 1 | 1 ANKUB1        | -      |
| ENSG00000206203 | 5.13E-15 | -2.63127 | 1 | 1 TSSK2         | K08811 |
| ENSG00000206249 | 5.13E-15 | -2.63127 | 1 | 1 CTD-2308N23.2 | -      |
| ENSG00000206260 | 5.13E-15 | -2.63127 | 1 | 1 PRR23A        | K12581 |
| ENSG00000206341 | 5.13E-15 | -2.63127 | 1 | 1 HLA-H         | K06751 |
| ENSG00000206344 | 5.13E-15 | -2.63127 | 1 | 1 HCG27         | -      |
| ENSG00000206356 | 5.13E-15 | -2.63127 | 1 | 1 RP11-93O17.2  | -      |
| ENSG00000206422 | 5.13E-15 | -2.63127 | 1 | 1 LRRC30        | -      |
| ENSG00000206432 | 5.13E-15 | -2.63127 | 1 | 1 TMEM200C      | -      |
| ENSG00000206448 | 5.13E-15 | -2.63127 | 1 | 1 PPIAP30       | K03767 |
| ENSG00000206474 | 5.13E-15 | -2.63127 | 1 | 1 OR10C1        | K04257 |
| ENSG00000206483 | 5.13E-15 | -2.63127 | 1 | 1 TXNRD3NB      | K00384 |
| ENSG00000206531 | 5.13E-15 | -2.63127 | 1 | 1 CD200R1L      | -      |
| ENSG00000206536 | 5.13E-15 | -2.63127 | 1 | 1 OR5K3         | K04257 |
| ENSG00000206552 | 5.13E-15 | -2.63127 | 1 | 1 KRBOX1-AS1    | -      |
| ENSG00000206557 | 5.13E-15 | -2.63127 | 1 | 1 TRIM71        | K12035 |
| ENSG00000206579 | 5.13E-15 | -2.63127 | 1 | 1 XKR4          | K17985 |
| ENSG00000206582 | 5.13E-15 | -2.63127 | 1 | 1 Y_RNA         | -      |
| ENSG00000206583 | 5.13E-15 | -2.63127 | 1 | 1 RNU6-1292P    | -      |
| ENSG00000206585 | 5.13E-15 | -2.63127 | 1 | 1 RNVU1-9       | -      |
| ENSG00000206587 | 5.13E-15 | -2.63127 | 1 | 1 RNU6-46P      | -      |
| ENSG00000206588 | 5.13E-15 | -2.63127 | 1 | 1 RNU1-28P      | -      |
| ENSG00000206589 | 5.13E-15 | -2.63127 | 1 | 1 RNU6-354P     | -      |
| ENSG00000206590 | 5.13E-15 | -2.63127 | 1 | 1 RNU6-132P     | -      |
| ENSG00000206592 | 5.13E-15 | -2.63127 | 1 | 1 SNORA18       | -      |
| ENSG00000206593 | 5.13E-15 | -2.63127 | 1 | 1 RNU6-47P      | -      |
| ENSG00000206595 | 5.13E-15 | -2.63127 | 1 | 1 RNU6-877P     | -      |
| ENSG00000206596 | 5.13E-15 | -2.63127 | 1 | 1 RNU1-27P      | -      |
| ENSG00000206597 | 5.13E-15 | -2.63127 | 1 | 1 SNORA57       | -      |
| ENSG00000206598 | 5.13E-15 | -2.63127 | 1 | 1 RNU6-1286P    | -      |
| ENSG00000206599 | 5.13E-15 | -2.63127 | 1 | 1 RNU6-841P     | -      |
| ENSG00000206600 | 5.13E-15 | -2.63127 | 1 | 1 RNU6-25P      | -      |
| ENSG00000206602 | 5.13E-15 | -2.63127 | 1 | 1 SNORD58A      | -      |
| ENSG00000206604 | 5.13E-15 | -2.63127 | 1 | 1 RNU6-425P     | -      |
| ENSG00000206606 | 5.13E-15 | -2.63127 | 1 | 1 RNU6-1296P    | -      |
| ENSG00000206609 | 5.13E-15 | -2.63127 | 1 | 1 SNORD116-11   | -      |
| ENSG00000206611 | 5.13E-15 | -2.63127 | 1 | 1 SNORD24       | -      |
| ENSG00000206613 | 5.13E-15 | -2.63127 | 1 | 1 RNU6-1336P    | -      |
| ENSG00000206614 | 5.13E-15 | -2.63127 | 1 | 1 RNU6-477P     | -      |

|                 |          |          |   |               |    |
|-----------------|----------|----------|---|---------------|----|
| ENSG00000206615 | 5.13E-15 | -2.63127 | 1 | 1 RNU6-338P   | -- |
| ENSG00000206616 | 5.13E-15 | -2.63127 | 1 | 1 RNU6-741P   | -- |
| ENSG00000206617 | 5.13E-15 | -2.63127 | 1 | 1 RNY1P5      | -- |
| ENSG00000206618 | 5.13E-15 | -2.63127 | 1 | 1 RNU6-1264P  | -- |
| ENSG00000206620 | 5.13E-15 | -2.63127 | 1 | 1 SNORD45C    | -- |
| ENSG00000206621 | 5.13E-15 | -2.63127 | 1 | 1 SNORD116-14 | -- |
| ENSG00000206623 | 5.13E-15 | -2.63127 | 1 | 1 RNU6-979P   | -- |
| ENSG00000206624 | 5.13E-15 | -2.63127 | 1 | 1 RNU1-39P    | -- |
| ENSG00000206625 | 5.13E-15 | -2.63127 | 1 | 1 RNU6-1      | -- |
| ENSG00000206627 | 5.13E-15 | -2.63127 | 1 | 1 RNU6-969P   | -- |
| ENSG00000206629 | 5.13E-15 | -2.63127 | 1 | 1 RNU1-63P    | -- |
| ENSG00000206631 | 5.13E-15 | -2.63127 | 1 | 1 RNU6-657P   | -- |
| ENSG00000206635 | 5.13E-15 | -2.63127 | 1 | 1 RNU6-1062P  | -- |
| ENSG00000206636 | 5.13E-15 | -2.63127 | 1 | 1 Y_RNA       | -- |
| ENSG00000206637 | 5.13E-15 | -2.63127 | 1 | 1 SNORA70     | -- |
| ENSG00000206638 | 5.13E-15 | -2.63127 | 1 | 1 RNU6-672P   | -- |
| ENSG00000206639 | 5.13E-15 | -2.63127 | 1 | 1 Y_RNA       | -- |
| ENSG00000206641 | 5.13E-15 | -2.63127 | 1 | 1 RNU6-449P   | -- |
| ENSG00000206644 | 5.13E-15 | -2.63127 | 1 | 1 RNU6-1279P  | -- |
| ENSG00000206649 | 5.13E-15 | -2.63127 | 1 | 1 SNORA20     | -- |
| ENSG00000206652 | 5.13E-15 | -2.63127 | 1 | 1 RNU1-1      | -- |
| ENSG00000206654 | 5.13E-15 | -2.63127 | 1 | 1 RNU6-608P   | -- |
| ENSG00000206656 | 5.13E-15 | -2.63127 | 1 | 1 SNORD116-17 | -- |
| ENSG00000206659 | 5.13E-15 | -2.63127 | 1 | 1 Y_RNA       | -- |
| ENSG00000206660 | 5.13E-15 | -2.63127 | 1 | 1 Y_RNA       | -- |
| ENSG00000206661 | 5.13E-15 | -2.63127 | 1 | 1 SNORA70     | -- |
| ENSG00000206662 | 5.13E-15 | -2.63127 | 1 | 1 Y_RNA       | -- |
| ENSG00000206663 | 5.13E-15 | -2.63127 | 1 | 1 Y_RNA       | -- |
| ENSG00000206665 | 5.13E-15 | -2.63127 | 1 | 1 RNU6-573P   | -- |
| ENSG00000206669 | 5.13E-15 | -2.63127 | 1 | 1 Y_RNA       | -- |
| ENSG00000206671 | 5.13E-15 | -2.63127 | 1 | 1 RNU6-471P   | -- |
| ENSG00000206672 | 5.13E-15 | -2.63127 | 1 | 1 Y_RNA       | -- |
| ENSG00000206675 | 5.13E-15 | -2.63127 | 1 | 1 RNU6-32P    | -- |
| ENSG00000206676 | 5.13E-15 | -2.63127 | 1 | 1 Y_RNA       | -- |
| ENSG00000206677 | 5.13E-15 | -2.63127 | 1 | 1 Y_RNA       | -- |
| ENSG00000206678 | 5.13E-15 | -2.63127 | 1 | 1 RNU6-144P   | -- |
| ENSG00000206680 | 5.13E-15 | -2.63127 | 1 | 1 SNORD21     | -- |
| ENSG00000206681 | 5.13E-15 | -2.63127 | 1 | 1 RNU6-730P   | -- |
| ENSG00000206682 | 5.13E-15 | -2.63127 | 1 | 1 Y_RNA       | -- |
| ENSG00000206684 | 5.13E-15 | -2.63127 | 1 | 1 RNU6-157P   | -- |
| ENSG00000206685 | 5.13E-15 | -2.63127 | 1 | 1 RNU6-1189P  | -- |
| ENSG00000206686 | 5.13E-15 | -2.63127 | 1 | 1 RNU6-1036P  | -- |
| ENSG00000206687 | 5.13E-15 | -2.63127 | 1 | 1 RNU1-109P   | -- |
| ENSG00000206688 | 5.13E-15 | -2.63127 | 1 | 1 SNORD116-18 | -- |
| ENSG00000206690 | 5.13E-15 | -2.63127 | 1 | 1 Y_RNA       | -- |
| ENSG00000206692 | 5.13E-15 | -2.63127 | 1 | 1 Y_RNA       | -- |
| ENSG00000206693 | 5.13E-15 | -2.63127 | 1 | 1 SNORA56     | -- |
| ENSG00000206694 | 5.13E-15 | -2.63127 | 1 | 1 RNVU1-3     | -- |
| ENSG00000206695 | 5.13E-15 | -2.63127 | 1 | 1 RNU6-442P   | -- |
| ENSG00000206697 | 5.13E-15 | -2.63127 | 1 | 1 RNY1P8      | -- |
| ENSG00000206699 | 5.13E-15 | -2.63127 | 1 | 1 Y_RNA       | -- |
| ENSG00000206700 | 5.13E-15 | -2.63127 | 1 | 1 RNU6-723P   | -- |
| ENSG00000206701 | 5.13E-15 | -2.63127 | 1 | 1 RNU6-1040P  | -- |
| ENSG00000206702 | 5.13E-15 | -2.63127 | 1 | 1 RNU1-11P    | -- |
| ENSG00000206703 | 5.13E-15 | -2.63127 | 1 | 1 RNU6-128P   | -- |
| ENSG00000206704 | 5.13E-15 | -2.63127 | 1 | 1 Y_RNA       | -- |
| ENSG00000206705 | 5.13E-15 | -2.63127 | 1 | 1 Y_RNA       | -- |
| ENSG00000206706 | 5.13E-15 | -2.63127 | 1 | 1 Y_RNA       | -- |

|                 |          |          |   |              |    |
|-----------------|----------|----------|---|--------------|----|
| ENSG00000206708 | 5.13E-15 | -2.63127 | 1 | 1 RNU6-1227P | -- |
| ENSG00000206709 | 5.13E-15 | -2.63127 | 1 | 1 RNU6-1080P | -- |
| ENSG00000206710 | 5.13E-15 | -2.63127 | 1 | 1 RNU6-147P  | -- |
| ENSG00000206711 | 5.13E-15 | -2.63127 | 1 | 1 Y_RNA      | -- |
| ENSG00000206714 | 5.13E-15 | -2.63127 | 1 | 1 Y_RNA      | -- |
| ENSG00000206715 | 5.13E-15 | -2.63127 | 1 | 1 RNU6-444P  | -- |
| ENSG00000206716 | 5.13E-15 | -2.63127 | 1 | 1 RNU6-133P  | -- |
| ENSG00000206717 | 5.13E-15 | -2.63127 | 1 | 1 Y_RNA      | -- |
| ENSG00000206718 | 5.13E-15 | -2.63127 | 1 | 1 RNU6-546P  | -- |
| ENSG00000206719 | 5.13E-15 | -2.63127 | 1 | 1 Y_RNA      | -- |
| ENSG00000206721 | 5.13E-15 | -2.63127 | 1 | 1 Y_RNA      | -- |
| ENSG00000206722 | 5.13E-15 | -2.63127 | 1 | 1 RNU6-1074P | -- |
| ENSG00000206723 | 5.13E-15 | -2.63127 | 1 | 1 RNU6-1056P | -- |
| ENSG00000206724 | 5.13E-15 | -2.63127 | 1 | 1 RNU6-756P  | -- |
| ENSG00000206725 | 5.13E-15 | -2.63127 | 1 | 1 RNU6-1027P | -- |
| ENSG00000206726 | 5.13E-15 | -2.63127 | 1 | 1 RNU6-259P  | -- |
| ENSG00000206727 | 5.13E-15 | -2.63127 | 1 | 1 SNORD116-9 | -- |
| ENSG00000206729 | 5.13E-15 | -2.63127 | 1 | 1 RNU6-1126P | -- |
| ENSG00000206730 | 5.13E-15 | -2.63127 | 1 | 1 RNU6-468P  | -- |
| ENSG00000206731 | 5.13E-15 | -2.63127 | 1 | 1 SNORA36    | -- |
| ENSG00000206732 | 5.13E-15 | -2.63127 | 1 | 1 RNU6-936P  | -- |
| ENSG00000206733 | 5.13E-15 | -2.63127 | 1 | 1 RNU6-641P  | -- |
| ENSG00000206734 | 5.13E-15 | -2.63127 | 1 | 1 Y_RNA      | -- |
| ENSG00000206737 | 5.13E-15 | -2.63127 | 1 | 1 RNVU1-18   | -- |
| ENSG00000206738 | 5.13E-15 | -2.63127 | 1 | 1 Y_RNA      | -- |
| ENSG00000206741 | 5.13E-15 | -2.63127 | 1 | 1 Y_RNA      | -- |
| ENSG00000206743 | 5.13E-15 | -2.63127 | 1 | 1 RNU6-484P  | -- |
| ENSG00000206744 | 5.13E-15 | -2.63127 | 1 | 1 RNU6-620P  | -- |
| ENSG00000206745 | 5.13E-15 | -2.63127 | 1 | 1 RNU6-643P  | -- |
| ENSG00000206746 | 5.13E-15 | -2.63127 | 1 | 1 RNU6-142P  | -- |
| ENSG00000206749 | 5.13E-15 | -2.63127 | 1 | 1 RNU6-1083P | -- |
| ENSG00000206751 | 5.13E-15 | -2.63127 | 1 | 1 Y_RNA      | -- |
| ENSG00000206752 | 5.13E-15 | -2.63127 | 1 | 1 RNU6-1323P | -- |
| ENSG00000206755 | 5.13E-15 | -2.63127 | 1 | 1 SNORA30    | -- |
| ENSG00000206756 | 5.13E-15 | -2.63127 | 1 | 1 Y_RNA      | -- |
| ENSG00000206758 | 5.13E-15 | -2.63127 | 1 | 1 RNU6-317P  | -- |
| ENSG00000206759 | 5.13E-15 | -2.63127 | 1 | 1 RNU6-787P  | -- |
| ENSG00000206760 | 5.13E-15 | -2.63127 | 1 | 1 SNORA6     | -- |
| ENSG00000206761 | 5.13E-15 | -2.63127 | 1 | 1 U3         | -- |
| ENSG00000206763 | 5.13E-15 | -2.63127 | 1 | 1 RNU6-10P   | -- |
| ENSG00000206764 | 5.13E-15 | -2.63127 | 1 | 1 RNU6-152P  | -- |
| ENSG00000206765 | 5.13E-15 | -2.63127 | 1 | 1 RNU6-203P  | -- |
| ENSG00000206766 | 5.13E-15 | -2.63127 | 1 | 1 RNU6-435P  | -- |
| ENSG00000206767 | 5.13E-15 | -2.63127 | 1 | 1 RNU6-949P  | -- |
| ENSG00000206769 | 5.13E-15 | -2.63127 | 1 | 1 RNU6-116P  | -- |
| ENSG00000206770 | 5.13E-15 | -2.63127 | 1 | 1 Y_RNA      | -- |
| ENSG00000206772 | 5.13E-15 | -2.63127 | 1 | 1 RNU6-44P   | -- |
| ENSG00000206774 | 5.13E-15 | -2.63127 | 1 | 1 RNU6-211P  | -- |
| ENSG00000206776 | 5.13E-15 | -2.63127 | 1 | 1 SNORA32    | -- |
| ENSG00000206777 | 5.13E-15 | -2.63127 | 1 | 1 RNU6-637P  | -- |
| ENSG00000206778 | 5.13E-15 | -2.63127 | 1 | 1 RNU6-213P  | -- |
| ENSG00000206779 | 5.13E-15 | -2.63127 | 1 | 1 Y_RNA      | -- |
| ENSG00000206780 | 5.13E-15 | -2.63127 | 1 | 1 SNORA75    | -- |
| ENSG00000206781 | 5.13E-15 | -2.63127 | 1 | 1 Y_RNA      | -- |
| ENSG00000206782 | 5.13E-15 | -2.63127 | 1 | 1 RNU6-224P  | -- |
| ENSG00000206783 | 5.13E-15 | -2.63127 | 1 | 1 RNU6-292P  | -- |
| ENSG00000206784 | 5.13E-15 | -2.63127 | 1 | 1 Y_RNA      | -- |
| ENSG00000206785 | 5.13E-15 | -2.63127 | 1 | 1 SNORA15    | -- |

|                 |          |          |   |              |    |
|-----------------|----------|----------|---|--------------|----|
| ENSG00000206787 | 5.13E-15 | -2.63127 | 1 | 1 RNU6-76P   | -- |
| ENSG00000206788 | 5.13E-15 | -2.63127 | 1 | 1 RNU6-629P  | -- |
| ENSG00000206790 | 5.13E-15 | -2.63127 | 1 | 1 Y_RNA      | -- |
| ENSG00000206791 | 5.13E-15 | -2.63127 | 1 | 1 RNU1-129P  | -- |
| ENSG00000206792 | 5.13E-15 | -2.63127 | 1 | 1 Y_RNA      | -- |
| ENSG00000206795 | 5.13E-15 | -2.63127 | 1 | 1 Y_RNA      | -- |
| ENSG00000206796 | 5.13E-15 | -2.63127 | 1 | 1 RNU6-811P  | -- |
| ENSG00000206797 | 5.13E-15 | -2.63127 | 1 | 1 Y_RNA      | -- |
| ENSG00000206799 | 5.13E-15 | -2.63127 | 1 | 1 SNORA32    | -- |
| ENSG00000206800 | 5.13E-15 | -2.63127 | 1 | 1 RNY3P7     | -- |
| ENSG00000206801 | 5.13E-15 | -2.63127 | 1 | 1 RNU6-639P  | -- |
| ENSG00000206802 | 5.13E-15 | -2.63127 | 1 | 1 RNU6-926P  | -- |
| ENSG00000206803 | 5.13E-15 | -2.63127 | 1 | 1 RNU6-968P  | -- |
| ENSG00000206804 | 5.13E-15 | -2.63127 | 1 | 1 RNU6-1293P | -- |
| ENSG00000206805 | 5.13E-15 | -2.63127 | 1 | 1 Y_RNA      | -- |
| ENSG00000206806 | 5.13E-15 | -2.63127 | 1 | 1 Y_RNA      | -- |
| ENSG00000206807 | 5.13E-15 | -2.63127 | 1 | 1 RNU6-815P  | -- |
| ENSG00000206811 | 5.13E-15 | -2.63127 | 1 | 1 SNORA10    | -- |
| ENSG00000206812 | 5.13E-15 | -2.63127 | 1 | 1 RNU6-38P   | -- |
| ENSG00000206813 | 5.13E-15 | -2.63127 | 1 | 1 Y_RNA      | -- |
| ENSG00000206815 | 5.13E-15 | -2.63127 | 1 | 1 RNU6-483P  | -- |
| ENSG00000206816 | 5.13E-15 | -2.63127 | 1 | 1 Y_RNA      | -- |
| ENSG00000206817 | 5.13E-15 | -2.63127 | 1 | 1 Y_RNA      | -- |
| ENSG00000206818 | 5.13E-15 | -2.63127 | 1 | 1 RNU6-849P  | -- |
| ENSG00000206819 | 5.13E-15 | -2.63127 | 1 | 1 RNU6-260P  | -- |
| ENSG00000206820 | 5.13E-15 | -2.63127 | 1 | 1 RNU1-138P  | -- |
| ENSG00000206822 | 5.13E-15 | -2.63127 | 1 | 1 Y_RNA      | -- |
| ENSG00000206826 | 5.13E-15 | -2.63127 | 1 | 1 RNU6-974P  | -- |
| ENSG00000206827 | 5.13E-15 | -2.63127 | 1 | 1 RNU6-1032P | -- |
| ENSG00000206828 | 5.13E-15 | -2.63127 | 1 | 1 RNVU1-5    | -- |
| ENSG00000206833 | 5.13E-15 | -2.63127 | 1 | 1 RNU6-20P   | -- |
| ENSG00000206834 | 5.13E-15 | -2.63127 | 1 | 1 SNORA1     | -- |
| ENSG00000206835 | 5.13E-15 | -2.63127 | 1 | 1 RNU1-74P   | -- |
| ENSG00000206836 | 5.13E-15 | -2.63127 | 1 | 1 RNU6-1029P | -- |
| ENSG00000206839 | 5.13E-15 | -2.63127 | 1 | 1 RNU6-746P  | -- |
| ENSG00000206840 | 5.13E-15 | -2.63127 | 1 | 1 Y_RNA      | -- |
| ENSG00000206841 | 5.13E-15 | -2.63127 | 1 | 1 RNU6-409P  | -- |
| ENSG00000206842 | 5.13E-15 | -2.63127 | 1 | 1 RNU6-413P  | -- |
| ENSG00000206843 | 5.13E-15 | -2.63127 | 1 | 1 RNU6-206P  | -- |
| ENSG00000206844 | 5.13E-15 | -2.63127 | 1 | 1 Y_RNA      | -- |
| ENSG00000206845 | 5.13E-15 | -2.63127 | 1 | 1 RNU6-209P  | -- |
| ENSG00000206846 | 5.13E-15 | -2.63127 | 1 | 1 Y_RNA      | -- |
| ENSG00000206847 | 5.13E-15 | -2.63127 | 1 | 1 Y_RNA      | -- |
| ENSG00000206849 | 5.13E-15 | -2.63127 | 1 | 1 SNORA18    | -- |
| ENSG00000206850 | 5.13E-15 | -2.63127 | 1 | 1 Y_RNA      | -- |
| ENSG00000206852 | 5.13E-15 | -2.63127 | 1 | 1 RNU6-895P  | -- |
| ENSG00000206853 | 5.13E-15 | -2.63127 | 1 | 1 SNORA51    | -- |
| ENSG00000206854 | 5.13E-15 | -2.63127 | 1 | 1 RNY3P5     | -- |
| ENSG00000206855 | 5.13E-15 | -2.63127 | 1 | 1 RNU6-571P  | -- |
| ENSG00000206856 | 5.13E-15 | -2.63127 | 1 | 1 RNU6-427P  | -- |
| ENSG00000206857 | 5.13E-15 | -2.63127 | 1 | 1 RNU6-214P  | -- |
| ENSG00000206858 | 5.13E-15 | -2.63127 | 1 | 1 Y_RNA      | -- |
| ENSG00000206862 | 5.13E-15 | -2.63127 | 1 | 1 Y_RNA      | -- |
| ENSG00000206863 | 5.13E-15 | -2.63127 | 1 | 1 RNU5A-6P   | -- |
| ENSG00000206864 | 5.13E-15 | -2.63127 | 1 | 1 RNU6-207P  | -- |
| ENSG00000206865 | 5.13E-15 | -2.63127 | 1 | 1 Y_RNA      | -- |
| ENSG00000206866 | 5.13E-15 | -2.63127 | 1 | 1 RNU6-187P  | -- |
| ENSG00000206867 | 5.13E-15 | -2.63127 | 1 | 1 RNU6-356P  | -- |

|                 |          |          |   |              |    |
|-----------------|----------|----------|---|--------------|----|
| ENSG00000206869 | 5.13E-15 | -2.63127 | 1 | 1 SNORA70F   | -- |
| ENSG00000206870 | 5.13E-15 | -2.63127 | 1 | 1 RNU6-398P  | -- |
| ENSG00000206871 | 5.13E-15 | -2.63127 | 1 | 1 RNU6-533P  | -- |
| ENSG00000206875 | 5.13E-15 | -2.63127 | 1 | 1 RNU6-761P  | -- |
| ENSG00000206877 | 5.13E-15 | -2.63127 | 1 | 1 RNU6-1103P | -- |
| ENSG00000206880 | 5.13E-15 | -2.63127 | 1 | 1 RNU6-1310P | -- |
| ENSG00000206882 | 5.13E-15 | -2.63127 | 1 | 1 RNA5SP87   | -- |
| ENSG00000206886 | 5.13E-15 | -2.63127 | 1 | 1 SNORA70    | -- |
| ENSG00000206888 | 5.13E-15 | -2.63127 | 1 | 1 RNU6-48P   | -- |
| ENSG00000206889 | 5.13E-15 | -2.63127 | 1 | 1 RNU6-1200P | -- |
| ENSG00000206891 | 5.13E-15 | -2.63127 | 1 | 1 RNU6-217P  | -- |
| ENSG00000206892 | 5.13E-15 | -2.63127 | 1 | 1 RNU6-42P   | -- |
| ENSG00000206895 | 5.13E-15 | -2.63127 | 1 | 1 Y_RNA      | -- |
| ENSG00000206896 | 5.13E-15 | -2.63127 | 1 | 1 RNU6-1124P | -- |
| ENSG00000206898 | 5.13E-15 | -2.63127 | 1 | 1 SNORA51    | -- |
| ENSG00000206900 | 5.13E-15 | -2.63127 | 1 | 1 RNU6-98P   | -- |
| ENSG00000206901 | 5.13E-15 | -2.63127 | 1 | 1 SNORA72    | -- |
| ENSG00000206902 | 5.13E-15 | -2.63127 | 1 | 1 Y_RNA      | -- |
| ENSG00000206903 | 5.13E-15 | -2.63127 | 1 | 1 SNORA24    | -- |
| ENSG00000206905 | 5.13E-15 | -2.63127 | 1 | 1 Y_RNA      | -- |
| ENSG00000206906 | 5.13E-15 | -2.63127 | 1 | 1 RNU6-458P  | -- |
| ENSG00000206907 | 5.13E-15 | -2.63127 | 1 | 1 RNU6-1013P | -- |
| ENSG00000206908 | 5.13E-15 | -2.63127 | 1 | 1 RNU1-136P  | -- |
| ENSG00000206909 | 5.13E-15 | -2.63127 | 1 | 1 SNORA70    | -- |
| ENSG00000206910 | 5.13E-15 | -2.63127 | 1 | 1 SNORA29    | -- |
| ENSG00000206911 | 5.13E-15 | -2.63127 | 1 | 1 Y_RNA      | -- |
| ENSG00000206912 | 5.13E-15 | -2.63127 | 1 | 1 Y_RNA      | -- |
| ENSG00000206914 | 5.13E-15 | -2.63127 | 1 | 1 Y_RNA      | -- |
| ENSG00000206915 | 5.13E-15 | -2.63127 | 1 | 1 RNU6-439P  | -- |
| ENSG00000206917 | 5.13E-15 | -2.63127 | 1 | 1 RNU1-52P   | -- |
| ENSG00000206918 | 5.13E-15 | -2.63127 | 1 | 1 RNU6-1181P | -- |
| ENSG00000206923 | 5.13E-15 | -2.63127 | 1 | 1 RNU6-432P  | -- |
| ENSG00000206924 | 5.13E-15 | -2.63127 | 1 | 1 RNU6-689P  | -- |
| ENSG00000206925 | 5.13E-15 | -2.63127 | 1 | 1 Y_RNA      | -- |
| ENSG00000206926 | 5.13E-15 | -2.63127 | 1 | 1 RNU6-1024P | -- |
| ENSG00000206927 | 5.13E-15 | -2.63127 | 1 | 1 Y_RNA      | -- |
| ENSG00000206929 | 5.13E-15 | -2.63127 | 1 | 1 Y_RNA      | -- |
| ENSG00000206931 | 5.13E-15 | -2.63127 | 1 | 1 RNU6-1042P | -- |
| ENSG00000206932 | 5.13E-15 | -2.63127 | 1 | 1 RNU6-4P    | -- |
| ENSG00000206935 | 5.13E-15 | -2.63127 | 1 | 1 RNU6-514P  | -- |
| ENSG00000206936 | 5.13E-15 | -2.63127 | 1 | 1 RNU4-52P   | -- |
| ENSG00000206938 | 5.13E-15 | -2.63127 | 1 | 1 RNU4-31P   | -- |
| ENSG00000206939 | 5.13E-15 | -2.63127 | 1 | 1 RNU6-281P  | -- |
| ENSG00000206941 | 5.13E-15 | -2.63127 | 1 | 1 SNORD15A   | -- |
| ENSG00000206944 | 5.13E-15 | -2.63127 | 1 | 1 RNU6-708P  | -- |
| ENSG00000206946 | 5.13E-15 | -2.63127 | 1 | 1 RNU6-156P  | -- |
| ENSG00000206947 | 5.13E-15 | -2.63127 | 1 | 1 SNORA20    | -- |
| ENSG00000206948 | 5.13E-15 | -2.63127 | 1 | 1 SNORA36A   | -- |
| ENSG00000206949 | 5.13E-15 | -2.63127 | 1 | 1 RNU6-1324P | -- |
| ENSG00000206950 | 5.13E-15 | -2.63127 | 1 | 1 Y_RNA      | -- |
| ENSG00000206951 | 5.13E-15 | -2.63127 | 1 | 1 Y_RNA      | -- |
| ENSG00000206954 | 5.13E-15 | -2.63127 | 1 | 1 RNU6-1201P | -- |
| ENSG00000206957 | 5.13E-15 | -2.63127 | 1 | 1 Y_RNA      | -- |
| ENSG00000206958 | 5.13E-15 | -2.63127 | 1 | 1 SNORA70    | -- |
| ENSG00000206959 | 5.13E-15 | -2.63127 | 1 | 1 Y_RNA      | -- |
| ENSG00000206960 | 5.13E-15 | -2.63127 | 1 | 1 RNU6-793P  | -- |
| ENSG00000206961 | 5.13E-15 | -2.63127 | 1 | 1 SNORA51    | -- |
| ENSG00000206963 | 5.13E-15 | -2.63127 | 1 | 1 RNU6-675P  | -- |

|                 |          |          |   |              |    |
|-----------------|----------|----------|---|--------------|----|
| ENSG00000206964 | 5.13E-15 | -2.63127 | 1 | 1 Y_RNA      | -- |
| ENSG00000206965 | 5.13E-15 | -2.63127 | 1 | 1 RNU6-5P    | -- |
| ENSG00000206967 | 5.13E-15 | -2.63127 | 1 | 1 Y_RNA      | -- |
| ENSG00000206968 | 5.13E-15 | -2.63127 | 1 | 1 RNVU1-16   | -- |
| ENSG00000206970 | 5.13E-15 | -2.63127 | 1 | 1 RNU6-474P  | -- |
| ENSG00000206972 | 5.13E-15 | -2.63127 | 1 | 1 RNU6-17P   | -- |
| ENSG00000206973 | 5.13E-15 | -2.63127 | 1 | 1 RNU6-1145P | -- |
| ENSG00000206974 | 5.13E-15 | -2.63127 | 1 | 1 RNU6-1144P | -- |
| ENSG00000206975 | 5.13E-15 | -2.63127 | 1 | 1 RNU6-13P   | -- |
| ENSG00000206976 | 5.13E-15 | -2.63127 | 1 | 1 SNORA7     | -- |
| ENSG00000206977 | 5.13E-15 | -2.63127 | 1 | 1 SNORA8     | -- |
| ENSG00000206978 | 5.13E-15 | -2.63127 | 1 | 1 Y_RNA      | -- |
| ENSG00000206979 | 5.13E-15 | -2.63127 | 1 | 1 SNORD61    | -- |
| ENSG00000206980 | 5.13E-15 | -2.63127 | 1 | 1 RNU6-662P  | -- |
| ENSG00000206981 | 5.13E-15 | -2.63127 | 1 | 1 RNU6-40P   | -- |
| ENSG00000206982 | 5.13E-15 | -2.63127 | 1 | 1 Y_RNA      | -- |
| ENSG00000206983 | 5.13E-15 | -2.63127 | 1 | 1 RNU6-49P   | -- |
| ENSG00000206985 | 5.13E-15 | -2.63127 | 1 | 1 RNU6-198P  | -- |
| ENSG00000206987 | 5.13E-15 | -2.63127 | 1 | 1 U8         | -- |
| ENSG00000206990 | 5.13E-15 | -2.63127 | 1 | 1 Y_RNA      | -- |
| ENSG00000206991 | 5.13E-15 | -2.63127 | 1 | 1 RNU6-610P  | -- |
| ENSG00000206996 | 5.13E-15 | -2.63127 | 1 | 1 RNU6-842P  | -- |
| ENSG00000206997 | 5.13E-15 | -2.63127 | 1 | 1 RNU6-524P  | -- |
| ENSG00000206998 | 5.13E-15 | -2.63127 | 1 | 1 Y_RNA      | -- |
| ENSG00000206999 | 5.13E-15 | -2.63127 | 1 | 1 RNU6-622P  | -- |
| ENSG00000207000 | 5.13E-15 | -2.63127 | 1 | 1 RNU6-820P  | -- |
| ENSG00000207001 | 5.13E-15 | -2.63127 | 1 | 1 SNORD116-2 | -- |
| ENSG00000207002 | 5.13E-15 | -2.63127 | 1 | 1 SNORA5     | -- |
| ENSG00000207004 | 5.13E-15 | -2.63127 | 1 | 1 RNU6-301P  | -- |
| ENSG00000207005 | 5.13E-15 | -2.63127 | 1 | 1 RNU1-2     | -- |
| ENSG00000207007 | 5.13E-15 | -2.63127 | 1 | 1 RNU6-891P  | -- |
| ENSG00000207010 | 5.13E-15 | -2.63127 | 1 | 1 RNU6-1295P | -- |
| ENSG00000207011 | 5.13E-15 | -2.63127 | 1 | 1 RNY4P13    | -- |
| ENSG00000207012 | 5.13E-15 | -2.63127 | 1 | 1 RNU6-72P   | -- |
| ENSG00000207013 | 5.13E-15 | -2.63127 | 1 | 1 RNU6-804P  | -- |
| ENSG00000207014 | 5.13E-15 | -2.63127 | 1 | 1 SNORD116-3 | -- |
| ENSG00000207016 | 5.13E-15 | -2.63127 | 1 | 1 SNORA36C   | -- |
| ENSG00000207019 | 5.13E-15 | -2.63127 | 1 | 1 RNU6-167P  | -- |
| ENSG00000207020 | 5.13E-15 | -2.63127 | 1 | 1 Y_RNA      | -- |
| ENSG00000207022 | 5.13E-15 | -2.63127 | 1 | 1 SNORA51    | -- |
| ENSG00000207023 | 5.13E-15 | -2.63127 | 1 | 1 RNU6-975P  | -- |
| ENSG00000207024 | 5.13E-15 | -2.63127 | 1 | 1 Y_RNA      | -- |
| ENSG00000207025 | 5.13E-15 | -2.63127 | 1 | 1 Y_RNA      | -- |
| ENSG00000207026 | 5.13E-15 | -2.63127 | 1 | 1 RNU6-472P  | -- |
| ENSG00000207027 | 5.13E-15 | -2.63127 | 1 | 1 SNORA67    | -- |
| ENSG00000207029 | 5.13E-15 | -2.63127 | 1 | 1 RNU6-43P   | -- |
| ENSG00000207031 | 5.13E-15 | -2.63127 | 1 | 1 SNORD59A   | -- |
| ENSG00000207032 | 5.13E-15 | -2.63127 | 1 | 1 Y_RNA      | -- |
| ENSG00000207033 | 5.13E-15 | -2.63127 | 1 | 1 RNU6-154P  | -- |
| ENSG00000207034 | 5.13E-15 | -2.63127 | 1 | 1 Y_RNA      | -- |
| ENSG00000207037 | 5.13E-15 | -2.63127 | 1 | 1 RNU6-339P  | -- |
| ENSG00000207039 | 5.13E-15 | -2.63127 | 1 | 1 Y_RNA      | -- |
| ENSG00000207041 | 5.13E-15 | -2.63127 | 1 | 1 RNU6-3P    | -- |
| ENSG00000207044 | 5.13E-15 | -2.63127 | 1 | 1 RNU6-1226P | -- |
| ENSG00000207045 | 5.13E-15 | -2.63127 | 1 | 1 RNU6-532P  | -- |
| ENSG00000207046 | 5.13E-15 | -2.63127 | 1 | 1 RNU6-886P  | -- |
| ENSG00000207049 | 5.13E-15 | -2.63127 | 1 | 1 Y_RNA      | -- |
| ENSG00000207051 | 5.13E-15 | -2.63127 | 1 | 1 SNORA27    | -- |

|                 |          |          |   |              |    |
|-----------------|----------|----------|---|--------------|----|
| ENSG00000207053 | 5.13E-15 | -2.63127 | 1 | 1 RNU6-937P  | -- |
| ENSG00000207056 | 5.13E-15 | -2.63127 | 1 | 1 RNU1-8P    | -- |
| ENSG00000207058 | 5.13E-15 | -2.63127 | 1 | 1 RNU6-784P  | -- |
| ENSG00000207060 | 5.13E-15 | -2.63127 | 1 | 1 RNU6-480P  | -- |
| ENSG00000207061 | 5.13E-15 | -2.63127 | 1 | 1 Y_RNA      | -- |
| ENSG00000207063 | 5.13E-15 | -2.63127 | 1 | 1 SNORD116-1 | -- |
| ENSG00000207065 | 5.13E-15 | -2.63127 | 1 | 1 RNU5A-2P   | -- |
| ENSG00000207067 | 5.13E-15 | -2.63127 | 1 | 1 SNORA72    | -- |
| ENSG00000207068 | 5.13E-15 | -2.63127 | 1 | 1 RNU6-463P  | -- |
| ENSG00000207069 | 5.13E-15 | -2.63127 | 1 | 1 Y_RNA      | -- |
| ENSG00000207071 | 5.13E-15 | -2.63127 | 1 | 1 RNU6-1207P | -- |
| ENSG00000207072 | 5.13E-15 | -2.63127 | 1 | 1 RNU6-39P   | -- |
| ENSG00000207073 | 5.13E-15 | -2.63127 | 1 | 1 Y_RNA      | -- |
| ENSG00000207075 | 5.13E-15 | -2.63127 | 1 | 1 Y_RNA      | -- |
| ENSG00000207076 | 5.13E-15 | -2.63127 | 1 | 1 RNU6-1113P | -- |
| ENSG00000207077 | 5.13E-15 | -2.63127 | 1 | 1 RNU6-1119P | -- |
| ENSG00000207080 | 5.13E-15 | -2.63127 | 1 | 1 Y_RNA      | -- |
| ENSG00000207081 | 5.13E-15 | -2.63127 | 1 | 1 RNU6-616P  | -- |
| ENSG00000207082 | 5.13E-15 | -2.63127 | 1 | 1 RNU6-171P  | -- |
| ENSG00000207083 | 5.13E-15 | -2.63127 | 1 | 1 RNU6-22P   | -- |
| ENSG00000207084 | 5.13E-15 | -2.63127 | 1 | 1 SNORA72    | -- |
| ENSG00000207086 | 5.13E-15 | -2.63127 | 1 | 1 Y_RNA      | -- |
| ENSG00000207087 | 5.13E-15 | -2.63127 | 1 | 1 RNU6-242P  | -- |
| ENSG00000207089 | 5.13E-15 | -2.63127 | 1 | 1 RNU6-921P  | -- |
| ENSG00000207090 | 5.13E-15 | -2.63127 | 1 | 1 RNU6-517P  | -- |
| ENSG00000207091 | 5.13E-15 | -2.63127 | 1 | 1 Y_RNA      | -- |
| ENSG00000207092 | 5.13E-15 | -2.63127 | 1 | 1 Y_RNA      | -- |
| ENSG00000207093 | 5.13E-15 | -2.63127 | 1 | 1 SNORD116-8 | -- |
| ENSG00000207094 | 5.13E-15 | -2.63127 | 1 | 1 SNORA67    | -- |
| ENSG00000207095 | 5.13E-15 | -2.63127 | 1 | 1 RNU6-424P  | -- |
| ENSG00000207097 | 5.13E-15 | -2.63127 | 1 | 1 RNU6-614P  | -- |
| ENSG00000207098 | 5.13E-15 | -2.63127 | 1 | 1 SNORA70    | -- |
| ENSG00000207099 | 5.13E-15 | -2.63127 | 1 | 1 RNU6-166P  | -- |
| ENSG00000207100 | 5.13E-15 | -2.63127 | 1 | 1 SNORA8     | -- |
| ENSG00000207101 | 5.13E-15 | -2.63127 | 1 | 1 Y_RNA      | -- |
| ENSG00000207104 | 5.13E-15 | -2.63127 | 1 | 1 RNU6-434P  | -- |
| ENSG00000207105 | 5.13E-15 | -2.63127 | 1 | 1 Y_RNA      | -- |
| ENSG00000207106 | 5.13E-15 | -2.63127 | 1 | 1 RNVU1-4    | -- |
| ENSG00000207108 | 5.13E-15 | -2.63127 | 1 | 1 Y_RNA      | -- |
| ENSG00000207109 | 5.13E-15 | -2.63127 | 1 | 1 SNORD38    | -- |
| ENSG00000207112 | 5.13E-15 | -2.63127 | 1 | 1 SNORA25    | -- |
| ENSG00000207113 | 5.13E-15 | -2.63127 | 1 | 1 RNU6-16P   | -- |
| ENSG00000207114 | 5.13E-15 | -2.63127 | 1 | 1 RNU6-348P  | -- |
| ENSG00000207115 | 5.13E-15 | -2.63127 | 1 | 1 RNU6-364P  | -- |
| ENSG00000207116 | 5.13E-15 | -2.63127 | 1 | 1 RNU6-31P   | -- |
| ENSG00000207117 | 5.13E-15 | -2.63127 | 1 | 1 Y_RNA      | -- |
| ENSG00000207118 | 5.13E-15 | -2.63127 | 1 | 1 SNORD14D   | -- |
| ENSG00000207121 | 5.13E-15 | -2.63127 | 1 | 1 RNU6-1230P | -- |
| ENSG00000207122 | 5.13E-15 | -2.63127 | 1 | 1 RNU6-591P  | -- |
| ENSG00000207123 | 5.13E-15 | -2.63127 | 1 | 1 Y_RNA      | -- |
| ENSG00000207124 | 5.13E-15 | -2.63127 | 1 | 1 RNU6-163P  | -- |
| ENSG00000207128 | 5.13E-15 | -2.63127 | 1 | 1 RNU6-729P  | -- |
| ENSG00000207130 | 5.13E-15 | -2.63127 | 1 | 1 SNORA24    | -- |
| ENSG00000207131 | 5.13E-15 | -2.63127 | 1 | 1 Y_RNA      | -- |
| ENSG00000207132 | 5.13E-15 | -2.63127 | 1 | 1 Y_RNA      | -- |
| ENSG00000207133 | 5.13E-15 | -2.63127 | 1 | 1 SNORD116-7 | -- |
| ENSG00000207134 | 5.13E-15 | -2.63127 | 1 | 1 RNU6-106P  | -- |
| ENSG00000207135 | 5.13E-15 | -2.63127 | 1 | 1 RNU6-452P  | -- |

|                 |          |          |   |               |    |
|-----------------|----------|----------|---|---------------|----|
| ENSG00000207136 | 5.13E-15 | -2.63127 | 1 | 1 RNU6-769P   | -- |
| ENSG00000207137 | 5.13E-15 | -2.63127 | 1 | 1 SNORD116-13 | -- |
| ENSG00000207138 | 5.13E-15 | -2.63127 | 1 | 1 RNU6-869P   | -- |
| ENSG00000207139 | 5.13E-15 | -2.63127 | 1 | 1 Y_RNA       | -- |
| ENSG00000207141 | 5.13E-15 | -2.63127 | 1 | 1 RNU6-802P   | -- |
| ENSG00000207142 | 5.13E-15 | -2.63127 | 1 | 1 Y_RNA       | -- |
| ENSG00000207144 | 5.13E-15 | -2.63127 | 1 | 1 RNU6-1297P  | -- |
| ENSG00000207145 | 5.13E-15 | -2.63127 | 1 | 1 SNORA18     | -- |
| ENSG00000207147 | 5.13E-15 | -2.63127 | 1 | 1 SNORA51     | -- |
| ENSG00000207148 | 5.13E-15 | -2.63127 | 1 | 1 Y_RNA       | -- |
| ENSG00000207149 | 5.13E-15 | -2.63127 | 1 | 1 RNU6-465P   | -- |
| ENSG00000207150 | 5.13E-15 | -2.63127 | 1 | 1 RNU6-185P   | -- |
| ENSG00000207153 | 5.13E-15 | -2.63127 | 1 | 1 RNU6-933P   | -- |
| ENSG00000207154 | 5.13E-15 | -2.63127 | 1 | 1 RNU1-46P    | -- |
| ENSG00000207155 | 5.13E-15 | -2.63127 | 1 | 1 Y_RNA       | -- |
| ENSG00000207156 | 5.13E-15 | -2.63127 | 1 | 1 RNU6-505P   | -- |
| ENSG00000207157 | 5.13E-15 | -2.63127 | 1 | 1 RNY3P4      | -- |
| ENSG00000207158 | 5.13E-15 | -2.63127 | 1 | 1 RNU6-929P   | -- |
| ENSG00000207160 | 5.13E-15 | -2.63127 | 1 | 1 RNU6-1289P  | -- |
| ENSG00000207161 | 5.13E-15 | -2.63127 | 1 | 1 Y_RNA       | -- |
| ENSG00000207162 | 5.13E-15 | -2.63127 | 1 | 1 RNU6-549P   | -- |
| ENSG00000207163 | 5.13E-15 | -2.63127 | 1 | 1 RNU6-905P   | -- |
| ENSG00000207164 | 5.13E-15 | -2.63127 | 1 | 1 Y_RNA       | -- |
| ENSG00000207165 | 5.13E-15 | -2.63127 | 1 | 1 SNORA70     | -- |
| ENSG00000207166 | 5.13E-15 | -2.63127 | 1 | 1 SNORA68     | -- |
| ENSG00000207167 | 5.13E-15 | -2.63127 | 1 | 1 RNU6-1340P  | -- |
| ENSG00000207168 | 5.13E-15 | -2.63127 | 1 | 1 SNORA15     | -- |
| ENSG00000207169 | 5.13E-15 | -2.63127 | 1 | 1 RNU6-24P    | -- |
| ENSG00000207170 | 5.13E-15 | -2.63127 | 1 | 1 RNU6-1215P  | -- |
| ENSG00000207172 | 5.13E-15 | -2.63127 | 1 | 1 RNU6-1162P  | -- |
| ENSG00000207173 | 5.13E-15 | -2.63127 | 1 | 1 Y_RNA       | -- |
| ENSG00000207174 | 5.13E-15 | -2.63127 | 1 | 1 SNORD116-15 | -- |
| ENSG00000207176 | 5.13E-15 | -2.63127 | 1 | 1 Y_RNA       | -- |
| ENSG00000207177 | 5.13E-15 | -2.63127 | 1 | 1 SNORA51     | -- |
| ENSG00000207178 | 5.13E-15 | -2.63127 | 1 | 1 RNU6-1122P  | -- |
| ENSG00000207180 | 5.13E-15 | -2.63127 | 1 | 1 RNU6-411P   | -- |
| ENSG00000207182 | 5.13E-15 | -2.63127 | 1 | 1 RNU1-44P    | -- |
| ENSG00000207183 | 5.13E-15 | -2.63127 | 1 | 1 RNU6-843P   | -- |
| ENSG00000207184 | 5.13E-15 | -2.63127 | 1 | 1 Y_RNA       | -- |
| ENSG00000207185 | 5.13E-15 | -2.63127 | 1 | 1 RNU6-1157P  | -- |
| ENSG00000207187 | 5.13E-15 | -2.63127 | 1 | 1 SNORA64     | -- |
| ENSG00000207188 | 5.13E-15 | -2.63127 | 1 | 1 RNU6-569P   | -- |
| ENSG00000207189 | 5.13E-15 | -2.63127 | 1 | 1 Y_RNA       | -- |
| ENSG00000207190 | 5.13E-15 | -2.63127 | 1 | 1 RNU6-809P   | -- |
| ENSG00000207191 | 5.13E-15 | -2.63127 | 1 | 1 SNORD116-5  | -- |
| ENSG00000207192 | 5.13E-15 | -2.63127 | 1 | 1 RNU6-649P   | -- |
| ENSG00000207193 | 5.13E-15 | -2.63127 | 1 | 1 Y_RNA       | -- |
| ENSG00000207194 | 5.13E-15 | -2.63127 | 1 | 1 RNU6-1026P  | -- |
| ENSG00000207195 | 5.13E-15 | -2.63127 | 1 | 1 Y_RNA       | -- |
| ENSG00000207196 | 5.13E-15 | -2.63127 | 1 | 1 Y_RNA       | -- |
| ENSG00000207197 | 5.13E-15 | -2.63127 | 1 | 1 SNORD116-12 | -- |
| ENSG00000207198 | 5.13E-15 | -2.63127 | 1 | 1 RNU6-1195P  | -- |
| ENSG00000207199 | 5.13E-15 | -2.63127 | 1 | 1 SNORD38     | -- |
| ENSG00000207200 | 5.13E-15 | -2.63127 | 1 | 1 RNU6-45P    | -- |
| ENSG00000207201 | 5.13E-15 | -2.63127 | 1 | 1 RNU1-148P   | -- |
| ENSG00000207202 | 5.13E-15 | -2.63127 | 1 | 1 RNU6-800P   | -- |
| ENSG00000207203 | 5.13E-15 | -2.63127 | 1 | 1 RNU6-71P    | -- |
| ENSG00000207204 | 5.13E-15 | -2.63127 | 1 | 1 RNU6-393P   | -- |



|                 |          |          |   |               |    |
|-----------------|----------|----------|---|---------------|----|
| ENSG00000207205 | 5.13E-15 | -2.63127 | 1 | 1 RNVU1-15    | -- |
| ENSG00000207206 | 5.13E-15 | -2.63127 | 1 | 1 RNU6-1035P  | -- |
| ENSG00000207207 | 5.13E-15 | -2.63127 | 1 | 1 Y_RNA       | -- |
| ENSG00000207208 | 5.13E-15 | -2.63127 | 1 | 1 RNU6-790P   | -- |
| ENSG00000207209 | 5.13E-15 | -2.63127 | 1 | 1 Y_RNA       | -- |
| ENSG00000207210 | 5.13E-15 | -2.63127 | 1 | 1 Y_RNA       | -- |
| ENSG00000207212 | 5.13E-15 | -2.63127 | 1 | 1 Y_RNA       | -- |
| ENSG00000207213 | 5.13E-15 | -2.63127 | 1 | 1 Y_RNA       | -- |
| ENSG00000207214 | 5.13E-15 | -2.63127 | 1 | 1 RNU6-102P   | -- |
| ENSG00000207215 | 5.13E-15 | -2.63127 | 1 | 1 U3          | -- |
| ENSG00000207220 | 5.13E-15 | -2.63127 | 1 | 1 RNU1-57P    | -- |
| ENSG00000207221 | 5.13E-15 | -2.63127 | 1 | 1 SNORA70E    | -- |
| ENSG00000207222 | 5.13E-15 | -2.63127 | 1 | 1 RNU6-456P   | -- |
| ENSG00000207223 | 5.13E-15 | -2.63127 | 1 | 1 Y_RNA       | -- |
| ENSG00000207225 | 5.13E-15 | -2.63127 | 1 | 1 RNU6-692P   | -- |
| ENSG00000207227 | 5.13E-15 | -2.63127 | 1 | 1 RNU6-900P   | -- |
| ENSG00000207229 | 5.13E-15 | -2.63127 | 1 | 1 Y_RNA       | -- |
| ENSG00000207231 | 5.13E-15 | -2.63127 | 1 | 1 Y_RNA       | -- |
| ENSG00000207235 | 5.13E-15 | -2.63127 | 1 | 1 Y_RNA       | -- |
| ENSG00000207237 | 5.13E-15 | -2.63127 | 1 | 1 RNU6-110P   | -- |
| ENSG00000207241 | 5.13E-15 | -2.63127 | 1 | 1 SNORD45A    | -- |
| ENSG00000207242 | 5.13E-15 | -2.63127 | 1 | 1 RNU6-1065P  | -- |
| ENSG00000207243 | 5.13E-15 | -2.63127 | 1 | 1 Y_RNA       | -- |
| ENSG00000207244 | 5.13E-15 | -2.63127 | 1 | 1 SNORA70     | -- |
| ENSG00000207245 | 5.13E-15 | -2.63127 | 1 | 1 SNORD116-29 | -- |
| ENSG00000207247 | 5.13E-15 | -2.63127 | 1 | 1 Y_RNA       | -- |
| ENSG00000207248 | 5.13E-15 | -2.63127 | 1 | 1 RNU6-1005P  | -- |
| ENSG00000207249 | 5.13E-15 | -2.63127 | 1 | 1 SNORA72     | -- |
| ENSG00000207251 | 5.13E-15 | -2.63127 | 1 | 1 RNU6-342P   | -- |
| ENSG00000207252 | 5.13E-15 | -2.63127 | 1 | 1 Y_RNA       | -- |
| ENSG00000207255 | 5.13E-15 | -2.63127 | 1 | 1 RNU6-1117P  | -- |
| ENSG00000207256 | 5.13E-15 | -2.63127 | 1 | 1 RNU6-880P   | -- |
| ENSG00000207257 | 5.13E-15 | -2.63127 | 1 | 1 RNU6-18P    | -- |
| ENSG00000207258 | 5.13E-15 | -2.63127 | 1 | 1 Y_RNA       | -- |
| ENSG00000207260 | 5.13E-15 | -2.63127 | 1 | 1 RNU6-35P    | -- |
| ENSG00000207261 | 5.13E-15 | -2.63127 | 1 | 1 RNU6-738P   | -- |
| ENSG00000207263 | 5.13E-15 | -2.63127 | 1 | 1 SNORD116-16 | -- |
| ENSG00000207264 | 5.13E-15 | -2.63127 | 1 | 1 RNU6-15P    | -- |
| ENSG00000207265 | 5.13E-15 | -2.63127 | 1 | 1 Y_RNA       | -- |
| ENSG00000207266 | 5.13E-15 | -2.63127 | 1 | 1 RNU6-1241P  | -- |
| ENSG00000207267 | 5.13E-15 | -2.63127 | 1 | 1 RNU6-1081P  | -- |
| ENSG00000207268 | 5.13E-15 | -2.63127 | 1 | 1 SNORA70C    | -- |
| ENSG00000207269 | 5.13E-15 | -2.63127 | 1 | 1 RN7SKP62    | -- |
| ENSG00000207270 | 5.13E-15 | -2.63127 | 1 | 1 RNU6-601P   | -- |
| ENSG00000207271 | 5.13E-15 | -2.63127 | 1 | 1 Y_RNA       | -- |
| ENSG00000207274 | 5.13E-15 | -2.63127 | 1 | 1 SNORA70     | -- |
| ENSG00000207275 | 5.13E-15 | -2.63127 | 1 | 1 RNU6-441P   | -- |
| ENSG00000207276 | 5.13E-15 | -2.63127 | 1 | 1 RNU6-1160P  | -- |
| ENSG00000207277 | 5.13E-15 | -2.63127 | 1 | 1 RNA5SP284   | -- |
| ENSG00000207278 | 5.13E-15 | -2.63127 | 1 | 1 RNU6-831P   | -- |
| ENSG00000207279 | 5.13E-15 | -2.63127 | 1 | 1 SNORD116-24 | -- |
| ENSG00000207282 | 5.13E-15 | -2.63127 | 1 | 1 Y_RNA       | -- |
| ENSG00000207283 | 5.13E-15 | -2.63127 | 1 | 1 Y_RNA       | -- |
| ENSG00000207286 | 5.13E-15 | -2.63127 | 1 | 1 Y_RNA       | -- |
| ENSG00000207287 | 5.13E-15 | -2.63127 | 1 | 1 RNU6-1274P  | -- |
| ENSG00000207289 | 5.13E-15 | -2.63127 | 1 | 1 RNU6-1235P  | -- |
| ENSG00000207290 | 5.13E-15 | -2.63127 | 1 | 1 Y_RNA       | -- |
| ENSG00000207291 | 5.13E-15 | -2.63127 | 1 | 1 RNU6-30P    | -- |

|                 |          |          |   |              |    |
|-----------------|----------|----------|---|--------------|----|
| ENSG00000207292 | 5.13E-15 | -2.63127 | 1 | 1 Y_RNA      | -- |
| ENSG00000207293 | 5.13E-15 | -2.63127 | 1 | 1 Y_RNA      | -- |
| ENSG00000207294 | 5.13E-15 | -2.63127 | 1 | 1 Y_RNA      | -- |
| ENSG00000207295 | 5.13E-15 | -2.63127 | 1 | 1 RNU6-851P  | -- |
| ENSG00000207296 | 5.13E-15 | -2.63127 | 1 | 1 RNU6-140P  | -- |
| ENSG00000207298 | 5.13E-15 | -2.63127 | 1 | 1 RNU6-83P   | -- |
| ENSG00000207299 | 5.13E-15 | -2.63127 | 1 | 1 SNORD56    | -- |
| ENSG00000207300 | 5.13E-15 | -2.63127 | 1 | 1 Y_RNA      | -- |
| ENSG00000207302 | 5.13E-15 | -2.63127 | 1 | 1 Y_RNA      | -- |
| ENSG00000207303 | 5.13E-15 | -2.63127 | 1 | 1 Y_RNA      | -- |
| ENSG00000207304 | 5.13E-15 | -2.63127 | 1 | 1 SNORA8     | -- |
| ENSG00000207305 | 5.13E-15 | -2.63127 | 1 | 1 Y_RNA      | -- |
| ENSG00000207306 | 5.13E-15 | -2.63127 | 1 | 1 RNU6-1152P | -- |
| ENSG00000207307 | 5.13E-15 | -2.63127 | 1 | 1 RNU6-145P  | -- |
| ENSG00000207308 | 5.13E-15 | -2.63127 | 1 | 1 RNU6-878P  | -- |
| ENSG00000207309 | 5.13E-15 | -2.63127 | 1 | 1 RNU4-70P   | -- |
| ENSG00000207310 | 5.13E-15 | -2.63127 | 1 | 1 RNU6-1127P | -- |
| ENSG00000207312 | 5.13E-15 | -2.63127 | 1 | 1 RNU6-429P  | -- |
| ENSG00000207316 | 5.13E-15 | -2.63127 | 1 | 1 Y_RNA      | -- |
| ENSG00000207317 | 5.13E-15 | -2.63127 | 1 | 1 Y_RNA      | -- |
| ENSG00000207318 | 5.13E-15 | -2.63127 | 1 | 1 RNU6-1184P | -- |
| ENSG00000207319 | 5.13E-15 | -2.63127 | 1 | 1 Y_RNA      | -- |
| ENSG00000207320 | 5.13E-15 | -2.63127 | 1 | 1 Y_RNA      | -- |
| ENSG00000207321 | 5.13E-15 | -2.63127 | 1 | 1 RNU6-160P  | -- |
| ENSG00000207322 | 5.13E-15 | -2.63127 | 1 | 1 RNU1-89P   | -- |
| ENSG00000207323 | 5.13E-15 | -2.63127 | 1 | 1 RNU6-901P  | -- |
| ENSG00000207325 | 5.13E-15 | -2.63127 | 1 | 1 RNY1P4     | -- |
| ENSG00000207326 | 5.13E-15 | -2.63127 | 1 | 1 Y_RNA      | -- |
| ENSG00000207327 | 5.13E-15 | -2.63127 | 1 | 1 RNU6-883P  | -- |
| ENSG00000207328 | 5.13E-15 | -2.63127 | 1 | 1 RNU6-636P  | -- |
| ENSG00000207329 | 5.13E-15 | -2.63127 | 1 | 1 Y_RNA      | -- |
| ENSG00000207330 | 5.13E-15 | -2.63127 | 1 | 1 RNU6-73P   | -- |
| ENSG00000207331 | 5.13E-15 | -2.63127 | 1 | 1 RNU6-1263P | -- |
| ENSG00000207332 | 5.13E-15 | -2.63127 | 1 | 1 RNU6-146P  | -- |
| ENSG00000207333 | 5.13E-15 | -2.63127 | 1 | 1 RNU6-680P  | -- |
| ENSG00000207334 | 5.13E-15 | -2.63127 | 1 | 1 RNU6-12P   | -- |
| ENSG00000207336 | 5.13E-15 | -2.63127 | 1 | 1 RNU6-658P  | -- |
| ENSG00000207338 | 5.13E-15 | -2.63127 | 1 | 1 RNU6-296P  | -- |
| ENSG00000207339 | 5.13E-15 | -2.63127 | 1 | 1 RNU1-69P   | -- |
| ENSG00000207340 | 5.13E-15 | -2.63127 | 1 | 1 RNVU1-10   | -- |
| ENSG00000207341 | 5.13E-15 | -2.63127 | 1 | 1 RNA5SP64   | -- |
| ENSG00000207343 | 5.13E-15 | -2.63127 | 1 | 1 RNU6-225P  | -- |
| ENSG00000207344 | 5.13E-15 | -2.63127 | 1 | 1 SNORA22    | -- |
| ENSG00000207345 | 5.13E-15 | -2.63127 | 1 | 1 RNU6-1222P | -- |
| ENSG00000207347 | 5.13E-15 | -2.63127 | 1 | 1 RNU6-306P  | -- |
| ENSG00000207349 | 5.13E-15 | -2.63127 | 1 | 1 RNVU1-17   | -- |
| ENSG00000207351 | 5.13E-15 | -2.63127 | 1 | 1 Y_RNA      | -- |
| ENSG00000207352 | 5.13E-15 | -2.63127 | 1 | 1 RNU6-540P  | -- |
| ENSG00000207355 | 5.13E-15 | -2.63127 | 1 | 1 RNU6-1257P | -- |
| ENSG00000207356 | 5.13E-15 | -2.63127 | 1 | 1 Y_RNA      | -- |
| ENSG00000207359 | 5.13E-15 | -2.63127 | 1 | 1 RNU6-925P  | -- |
| ENSG00000207360 | 5.13E-15 | -2.63127 | 1 | 1 RNU6-14P   | -- |
| ENSG00000207361 | 5.13E-15 | -2.63127 | 1 | 1 RNU6-178P  | -- |
| ENSG00000207362 | 5.13E-15 | -2.63127 | 1 | 1 RNU6-422P  | -- |
| ENSG00000207363 | 5.13E-15 | -2.63127 | 1 | 1 Y_RNA      | -- |
| ENSG00000207364 | 5.13E-15 | -2.63127 | 1 | 1 RNU6-939P  | -- |
| ENSG00000207365 | 5.13E-15 | -2.63127 | 1 | 1 Y_RNA      | -- |
| ENSG00000207366 | 5.13E-15 | -2.63127 | 1 | 1 RNU6-297P  | -- |

|                 |          |          |   |               |    |
|-----------------|----------|----------|---|---------------|----|
| ENSG00000207367 | 5.13E-15 | -2.63127 | 1 | 1 RNU6-29P    | -- |
| ENSG00000207368 | 5.13E-15 | -2.63127 | 1 | 1 Y_RNA       | -- |
| ENSG00000207369 | 5.13E-15 | -2.63127 | 1 | 1 RNU6-665P   | -- |
| ENSG00000207371 | 5.13E-15 | -2.63127 | 1 | 1 Y_RNA       | -- |
| ENSG00000207375 | 5.13E-15 | -2.63127 | 1 | 1 SNORD116-23 | -- |
| ENSG00000207378 | 5.13E-15 | -2.63127 | 1 | 1 RNU6-748P   | -- |
| ENSG00000207379 | 5.13E-15 | -2.63127 | 1 | 1 Y_RNA       | -- |
| ENSG00000207381 | 5.13E-15 | -2.63127 | 1 | 1 RNU6-950P   | -- |
| ENSG00000207382 | 5.13E-15 | -2.63127 | 1 | 1 Y_RNA       | -- |
| ENSG00000207384 | 5.13E-15 | -2.63127 | 1 | 1 Y_RNA       | -- |
| ENSG00000207385 | 5.13E-15 | -2.63127 | 1 | 1 RNU6-310P   | -- |
| ENSG00000207386 | 5.13E-15 | -2.63127 | 1 | 1 Y_RNA       | -- |
| ENSG00000207387 | 5.13E-15 | -2.63127 | 1 | 1 Y_RNA       | -- |
| ENSG00000207389 | 5.13E-15 | -2.63127 | 1 | 1 RNU1-4      | -- |
| ENSG00000207390 | 5.13E-15 | -2.63127 | 1 | 1 Y_RNA       | -- |
| ENSG00000207391 | 5.13E-15 | -2.63127 | 1 | 1 Y_RNA       | -- |
| ENSG00000207392 | 5.13E-15 | -2.63127 | 1 | 1 SNORA20     | -- |
| ENSG00000207393 | 5.13E-15 | -2.63127 | 1 | 1 RNU6-136P   | -- |
| ENSG00000207394 | 5.13E-15 | -2.63127 | 1 | 1 RNU6-1060P  | -- |
| ENSG00000207395 | 5.13E-15 | -2.63127 | 1 | 1 Y_RNA       | -- |
| ENSG00000207397 | 5.13E-15 | -2.63127 | 1 | 1 RNU6-1179P  | -- |
| ENSG00000207401 | 5.13E-15 | -2.63127 | 1 | 1 Y_RNA       | -- |
| ENSG00000207402 | 5.13E-15 | -2.63127 | 1 | 1 RNU6-959P   | -- |
| ENSG00000207403 | 5.13E-15 | -2.63127 | 1 | 1 Y_RNA       | -- |
| ENSG00000207404 | 5.13E-15 | -2.63127 | 1 | 1 Y_RNA       | -- |
| ENSG00000207405 | 5.13E-15 | -2.63127 | 1 | 1 SNORA64     | -- |
| ENSG00000207406 | 5.13E-15 | -2.63127 | 1 | 1 SNORA41     | -- |
| ENSG00000207407 | 5.13E-15 | -2.63127 | 1 | 1 SNORA1      | -- |
| ENSG00000207408 | 5.13E-15 | -2.63127 | 1 | 1 Y_RNA       | -- |
| ENSG00000207410 | 5.13E-15 | -2.63127 | 1 | 1 SNORA8      | -- |
| ENSG00000207411 | 5.13E-15 | -2.63127 | 1 | 1 Y_RNA       | -- |
| ENSG00000207412 | 5.13E-15 | -2.63127 | 1 | 1 RNU6-455P   | -- |
| ENSG00000207414 | 5.13E-15 | -2.63127 | 1 | 1 RNU6-768P   | -- |
| ENSG00000207415 | 5.13E-15 | -2.63127 | 1 | 1 RNU6-1151P  | -- |
| ENSG00000207416 | 5.13E-15 | -2.63127 | 1 | 1 Y_RNA       | -- |
| ENSG00000207417 | 5.13E-15 | -2.63127 | 1 | 1 Y_RNA       | -- |
| ENSG00000207418 | 5.13E-15 | -2.63127 | 1 | 1 RNVU1-7     | -- |
| ENSG00000207420 | 5.13E-15 | -2.63127 | 1 | 1 Y_RNA       | -- |
| ENSG00000207421 | 5.13E-15 | -2.63127 | 1 | 1 SNORD38B    | -- |
| ENSG00000207422 | 5.13E-15 | -2.63127 | 1 | 1 RNU6-813P   | -- |
| ENSG00000207426 | 5.13E-15 | -2.63127 | 1 | 1 Y_RNA       | -- |
| ENSG00000207428 | 5.13E-15 | -2.63127 | 1 | 1 RNU6-95P    | -- |
| ENSG00000207430 | 5.13E-15 | -2.63127 | 1 | 1 U8          | -- |
| ENSG00000207431 | 5.13E-15 | -2.63127 | 1 | 1 RNU6-906P   | -- |
| ENSG00000207432 | 5.13E-15 | -2.63127 | 1 | 1 U8          | -- |
| ENSG00000207433 | 5.13E-15 | -2.63127 | 1 | 1 RNU6-246P   | -- |
| ENSG00000207434 | 5.13E-15 | -2.63127 | 1 | 1 RNU6-1072P  | -- |
| ENSG00000207435 | 5.13E-15 | -2.63127 | 1 | 1 RNU6-114P   | -- |
| ENSG00000207439 | 5.13E-15 | -2.63127 | 1 | 1 Y_RNA       | -- |
| ENSG00000207440 | 5.13E-15 | -2.63127 | 1 | 1 RNU6-541P   | -- |
| ENSG00000207441 | 5.13E-15 | -2.63127 | 1 | 1 RNU6-21P    | -- |
| ENSG00000207442 | 5.13E-15 | -2.63127 | 1 | 1 SNORD116-6  | -- |
| ENSG00000207443 | 5.13E-15 | -2.63127 | 1 | 1 RNU6-417P   | -- |
| ENSG00000207444 | 5.13E-15 | -2.63127 | 1 | 1 SNORD56B    | -- |
| ENSG00000207448 | 5.13E-15 | -2.63127 | 1 | 1 RNU6-520P   | -- |
| ENSG00000207449 | 5.13E-15 | -2.63127 | 1 | 1 RNU6-19P    | -- |
| ENSG00000207451 | 5.13E-15 | -2.63127 | 1 | 1 RNU6-291P   | -- |
| ENSG00000207452 | 5.13E-15 | -2.63127 | 1 | 1 RNU6-606P   | -- |

|                 |          |          |   |               |    |
|-----------------|----------|----------|---|---------------|----|
| ENSG00000207453 | 5.13E-15 | -2.63127 | 1 | 1 RNU6-535P   | -- |
| ENSG00000207454 | 5.13E-15 | -2.63127 | 1 | 1 RNU6-1104P  | -- |
| ENSG00000207456 | 5.13E-15 | -2.63127 | 1 | 1 RNU6-997P   | -- |
| ENSG00000207458 | 5.13E-15 | -2.63127 | 1 | 1 RNY3P9      | -- |
| ENSG00000207459 | 5.13E-15 | -2.63127 | 1 | 1 RNU6-1311P  | -- |
| ENSG00000207460 | 5.13E-15 | -2.63127 | 1 | 1 SNORD116-19 | -- |
| ENSG00000207461 | 5.13E-15 | -2.63127 | 1 | 1 RNU6-253P   | -- |
| ENSG00000207462 | 5.13E-15 | -2.63127 | 1 | 1 RNU6-376P   | -- |
| ENSG00000207465 | 5.13E-15 | -2.63127 | 1 | 1 RNU6-734P   | -- |
| ENSG00000207466 | 5.13E-15 | -2.63127 | 1 | 1 Y_RNA       | -- |
| ENSG00000207472 | 5.13E-15 | -2.63127 | 1 | 1 RNU6-41P    | -- |
| ENSG00000207473 | 5.13E-15 | -2.63127 | 1 | 1 Y_RNA       | -- |
| ENSG00000207474 | 5.13E-15 | -2.63127 | 1 | 1 RNY1P7      | -- |
| ENSG00000207475 | 5.13E-15 | -2.63127 | 1 | 1 SNORA42     | -- |
| ENSG00000207476 | 5.13E-15 | -2.63127 | 1 | 1 RNU6-286P   | -- |
| ENSG00000207477 | 5.13E-15 | -2.63127 | 1 | 1 RNU6-318P   | -- |
| ENSG00000207480 | 5.13E-15 | -2.63127 | 1 | 1 Y_RNA       | -- |
| ENSG00000207481 | 5.13E-15 | -2.63127 | 1 | 1 Y_RNA       | -- |
| ENSG00000207483 | 5.13E-15 | -2.63127 | 1 | 1 RNU6-1067P  | -- |
| ENSG00000207484 | 5.13E-15 | -2.63127 | 1 | 1 Y_RNA       | -- |
| ENSG00000207486 | 5.13E-15 | -2.63127 | 1 | 1 RNU6-1044P  | -- |
| ENSG00000207488 | 5.13E-15 | -2.63127 | 1 | 1 Y_RNA       | -- |
| ENSG00000207490 | 5.13E-15 | -2.63127 | 1 | 1 RNU6-987P   | -- |
| ENSG00000207491 | 5.13E-15 | -2.63127 | 1 | 1 RNU6-423P   | -- |
| ENSG00000207492 | 5.13E-15 | -2.63127 | 1 | 1 RNU6-713P   | -- |
| ENSG00000207493 | 5.13E-15 | -2.63127 | 1 | 1 SNORA46     | -- |
| ENSG00000207494 | 5.13E-15 | -2.63127 | 1 | 1 Y_RNA       | -- |
| ENSG00000207495 | 5.13E-15 | -2.63127 | 1 | 1 RNY3P10     | -- |
| ENSG00000207496 | 5.13E-15 | -2.63127 | 1 | 1 SNORA7A     | -- |
| ENSG00000207497 | 5.13E-15 | -2.63127 | 1 | 1 Y_RNA       | -- |
| ENSG00000207499 | 5.13E-15 | -2.63127 | 1 | 1 Y_RNA       | -- |
| ENSG00000207500 | 5.13E-15 | -2.63127 | 1 | 1 SNORD102    | -- |
| ENSG00000207501 | 5.13E-15 | -2.63127 | 1 | 1 RNVI1-14    | -- |
| ENSG00000207502 | 5.13E-15 | -2.63127 | 1 | 1 SNORA42     | -- |
| ENSG00000207503 | 5.13E-15 | -2.63127 | 1 | 1 SNORA32     | -- |
| ENSG00000207504 | 5.13E-15 | -2.63127 | 1 | 1 RNU6-1031P  | -- |
| ENSG00000207505 | 5.13E-15 | -2.63127 | 1 | 1 RNU6-1105P  | -- |
| ENSG00000207507 | 5.13E-15 | -2.63127 | 1 | 1 RNU6-9      | -- |
| ENSG00000207508 | 5.13E-15 | -2.63127 | 1 | 1 RNU6-1237P  | -- |
| ENSG00000207511 | 5.13E-15 | -2.63127 | 1 | 1 RNU6-771P   | -- |
| ENSG00000207513 | 5.13E-15 | -2.63127 | 1 | 1 RNU1-3      | -- |
| ENSG00000207514 | 5.13E-15 | -2.63127 | 1 | 1 RNU6-385P   | -- |
| ENSG00000207515 | 5.13E-15 | -2.63127 | 1 | 1 RNU6-555P   | -- |
| ENSG00000207516 | 5.13E-15 | -2.63127 | 1 | 1 SNORA41     | -- |
| ENSG00000207518 | 5.13E-15 | -2.63127 | 1 | 1 RNU6-59P    | -- |
| ENSG00000207524 | 5.13E-15 | -2.63127 | 1 | 1 RNU6-33P    | -- |
| ENSG00000207525 | 5.13E-15 | -2.63127 | 1 | 1 Y_RNA       | -- |
| ENSG00000207546 | 5.13E-15 | -2.63127 | 1 | 1 MIR548C     | -- |
| ENSG00000207548 | 5.13E-15 | -2.63127 | 1 | 1 MIR217      | -- |
| ENSG00000207549 | 5.13E-15 | -2.63127 | 1 | 1 MIR521-2    | -- |
| ENSG00000207550 | 5.13E-15 | -2.63127 | 1 | 1 MIR99B      | -- |
| ENSG00000207551 | 5.13E-15 | -2.63127 | 1 | 1 MIR608      | -- |
| ENSG00000207552 | 5.13E-15 | -2.63127 | 1 | 1 MIR633      | -- |
| ENSG00000207553 | 5.13E-15 | -2.63127 | 1 | 1 MIR518C     | -- |
| ENSG00000207555 | 5.13E-15 | -2.63127 | 1 | 1 MIR520F     | -- |
| ENSG00000207556 | 5.13E-15 | -2.63127 | 1 | 1 MIR636      | -- |
| ENSG00000207558 | 5.13E-15 | -2.63127 | 1 | 1 MIR487A     | -- |
| ENSG00000207559 | 5.13E-15 | -2.63127 | 1 | 1 MIR578      | -- |

|                 |          |          |   |   |          |    |
|-----------------|----------|----------|---|---|----------|----|
| ENSG00000207562 | 5.13E-15 | -2.63127 | 1 | 1 | MIR34C   | -- |
| ENSG00000207569 | 5.13E-15 | -2.63127 | 1 | 1 | MIR433   | -- |
| ENSG00000207571 | 5.13E-15 | -2.63127 | 1 | 1 | MIR615   | -- |
| ENSG00000207572 | 5.13E-15 | -2.63127 | 1 | 1 | MIR363   | -- |
| ENSG00000207573 | 5.13E-15 | -2.63127 | 1 | 1 | MIR550A2 | -- |
| ENSG00000207574 | 5.13E-15 | -2.63127 | 1 | 1 | MIR661   | -- |
| ENSG00000207577 | 5.13E-15 | -2.63127 | 1 | 1 | MIR587   | -- |
| ENSG00000207578 | 5.13E-15 | -2.63127 | 1 | 1 | MIR583   | -- |
| ENSG00000207579 | 5.13E-15 | -2.63127 | 1 | 1 | MIR662   | -- |
| ENSG00000207580 | 5.13E-15 | -2.63127 | 1 | 1 | MIR526B  | -- |
| ENSG00000207581 | 5.13E-15 | -2.63127 | 1 | 1 | MIR199B  | -- |
| ENSG00000207582 | 5.13E-15 | -2.63127 | 1 | 1 | MIR30B   | -- |
| ENSG00000207583 | 5.13E-15 | -2.63127 | 1 | 1 | MIR606   | -- |
| ENSG00000207584 | 5.13E-15 | -2.63127 | 1 | 1 | MIR196B  | -- |
| ENSG00000207585 | 5.13E-15 | -2.63127 | 1 | 1 | MIR181D  | -- |
| ENSG00000207586 | 5.13E-15 | -2.63127 | 1 | 1 | MIR135A2 | -- |
| ENSG00000207587 | 5.13E-15 | -2.63127 | 1 | 1 | MIR544A  | -- |
| ENSG00000207589 | 5.13E-15 | -2.63127 | 1 | 1 | MIR508   | -- |
| ENSG00000207590 | 5.13E-15 | -2.63127 | 1 | 1 | MIR215   | -- |
| ENSG00000207594 | 5.13E-15 | -2.63127 | 1 | 1 | MIR520A  | -- |
| ENSG00000207595 | 5.13E-15 | -2.63127 | 1 | 1 | MIR181A2 | -- |
| ENSG00000207597 | 5.13E-15 | -2.63127 | 1 | 1 | MIR490   | -- |
| ENSG00000207598 | 5.13E-15 | -2.63127 | 1 | 1 | MIR124-3 | -- |
| ENSG00000207599 | 5.13E-15 | -2.63127 | 1 | 1 | MIR520E  | -- |
| ENSG00000207600 | 5.13E-15 | -2.63127 | 1 | 1 | MIR598   | -- |
| ENSG00000207601 | 5.13E-15 | -2.63127 | 1 | 1 | MIR611   | -- |
| ENSG00000207602 | 5.13E-15 | -2.63127 | 1 | 1 | MIR106A  | -- |
| ENSG00000207603 | 5.13E-15 | -2.63127 | 1 | 1 | MIR7-1   | -- |
| ENSG00000207604 | 5.13E-15 | -2.63127 | 1 | 1 | MIR206   | -- |
| ENSG00000207605 | 5.13E-15 | -2.63127 | 1 | 1 | MIR191   | -- |
| ENSG00000207606 | 5.13E-15 | -2.63127 | 1 | 1 | MIR554   | -- |
| ENSG00000207607 | 5.13E-15 | -2.63127 | 1 | 1 | MIR200A  | -- |
| ENSG00000207608 | 5.13E-15 | -2.63127 | 1 | 1 | MIR127   | -- |
| ENSG00000207611 | 5.13E-15 | -2.63127 | 1 | 1 | MIR149   | -- |
| ENSG00000207613 | 5.13E-15 | -2.63127 | 1 | 1 | MIR181C  | -- |
| ENSG00000207615 | 5.13E-15 | -2.63127 | 1 | 1 | MIR515-2 | -- |
| ENSG00000207616 | 5.13E-15 | -2.63127 | 1 | 1 | MIR515-1 | -- |
| ENSG00000207617 | 5.13E-15 | -2.63127 | 1 | 1 | MIR3074  | -- |
| ENSG00000207619 | 5.13E-15 | -2.63127 | 1 | 1 | MIR585   | -- |
| ENSG00000207620 | 5.13E-15 | -2.63127 | 1 | 1 | MIR516A2 | -- |
| ENSG00000207621 | 5.13E-15 | -2.63127 | 1 | 1 | MIR224   | -- |
| ENSG00000207622 | 5.13E-15 | -2.63127 | 1 | 1 | MIR619   | -- |
| ENSG00000207624 | 5.13E-15 | -2.63127 | 1 | 1 | MIR194-1 | -- |
| ENSG00000207625 | 5.13E-15 | -2.63127 | 1 | 1 | MIR128-2 | -- |
| ENSG00000207626 | 5.13E-15 | -2.63127 | 1 | 1 | MIR562   | -- |
| ENSG00000207627 | 5.13E-15 | -2.63127 | 1 | 1 | MIR581   | -- |
| ENSG00000207628 | 5.13E-15 | -2.63127 | 1 | 1 | MIR651   | -- |
| ENSG00000207629 | 5.13E-15 | -2.63127 | 1 | 1 | MIR526A1 | -- |
| ENSG00000207630 | 5.13E-15 | -2.63127 | 1 | 1 | MIR7-3   | -- |
| ENSG00000207632 | 5.13E-15 | -2.63127 | 1 | 1 | MIR588   | -- |
| ENSG00000207633 | 5.13E-15 | -2.63127 | 1 | 1 | MIR505   | -- |
| ENSG00000207634 | 5.13E-15 | -2.63127 | 1 | 1 | MIR521-1 | -- |
| ENSG00000207636 | 5.13E-15 | -2.63127 | 1 | 1 | MIR631   | -- |
| ENSG00000207637 | 5.13E-15 | -2.63127 | 1 | 1 | MIR595   | -- |
| ENSG00000207638 | 5.13E-15 | -2.63127 | 1 | 1 | MIR99A   | -- |
| ENSG00000207639 | 5.13E-15 | -2.63127 | 1 | 1 | MIR193B  | -- |
| ENSG00000207641 | 5.13E-15 | -2.63127 | 1 | 1 | MIR510   | -- |
| ENSG00000207642 | 5.13E-15 | -2.63127 | 1 | 1 | MIR571   | -- |

|                 |          |          |   |              |    |
|-----------------|----------|----------|---|--------------|----|
| ENSG00000207643 | 5.13E-15 | -2.63127 | 1 | 1 Z95704.1   | -- |
| ENSG00000207644 | 5.13E-15 | -2.63127 | 1 | 1 MIR512-2   | -- |
| ENSG00000207645 | 5.13E-15 | -2.63127 | 1 | 1 MIR512-1   | -- |
| ENSG00000207646 | 5.13E-15 | -2.63127 | 1 | 1 MIR655     | -- |
| ENSG00000207647 | 5.13E-15 | -2.63127 | 1 | 1 MIR153-1   | -- |
| ENSG00000207648 | 5.13E-15 | -2.63127 | 1 | 1 MIR192     | -- |
| ENSG00000207649 | 5.13E-15 | -2.63127 | 1 | 1 MIR138-2   | -- |
| ENSG00000207651 | 5.13E-15 | -2.63127 | 1 | 1 MIR28      | -- |
| ENSG00000207653 | 5.13E-15 | -2.63127 | 1 | 1 MIR558     | -- |
| ENSG00000207654 | 5.13E-15 | -2.63127 | 1 | 1 MIR128-1   | -- |
| ENSG00000207656 | 5.13E-15 | -2.63127 | 1 | 1 MIR489     | -- |
| ENSG00000207688 | 5.13E-15 | -2.63127 | 1 | 1 MIR548AA2  | -- |
| ENSG00000207689 | 5.13E-15 | -2.63127 | 1 | 1 MIR548A2   | -- |
| ENSG00000207690 | 5.13E-15 | -2.63127 | 1 | 1 MIR630     | -- |
| ENSG00000207691 | 5.13E-15 | -2.63127 | 1 | 1 MIR183     | -- |
| ENSG00000207692 | 5.13E-15 | -2.63127 | 1 | 1 MIR592     | -- |
| ENSG00000207695 | 5.13E-15 | -2.63127 | 1 | 1 MIR184     | -- |
| ENSG00000207699 | 5.13E-15 | -2.63127 | 1 | 1 MIR518A2   | -- |
| ENSG00000207701 | 5.13E-15 | -2.63127 | 1 | 1 MIR597     | -- |
| ENSG00000207702 | 5.13E-15 | -2.63127 | 1 | 1 MIR211     | -- |
| ENSG00000207703 | 5.13E-15 | -2.63127 | 1 | 1 MIR7-2     | -- |
| ENSG00000207705 | 5.13E-15 | -2.63127 | 1 | 1 MIR129-1   | -- |
| ENSG00000207706 | 5.13E-15 | -2.63127 | 1 | 1 MIR518F    | -- |
| ENSG00000207707 | 5.13E-15 | -2.63127 | 1 | 1 MIR639     | -- |
| ENSG00000207708 | 5.13E-15 | -2.63127 | 1 | 1 MIR141     | -- |
| ENSG00000207710 | 5.13E-15 | -2.63127 | 1 | 1 MIR20B     | -- |
| ENSG00000207711 | 5.13E-15 | -2.63127 | 1 | 1 MIR525     | -- |
| ENSG00000207712 | 5.13E-15 | -2.63127 | 1 | 1 MIR627     | -- |
| ENSG00000207713 | 5.13E-15 | -2.63127 | 1 | 1 MIR200C    | -- |
| ENSG00000207714 | 5.13E-15 | -2.63127 | 1 | 1 MIR584     | -- |
| ENSG00000207715 | 5.13E-15 | -2.63127 | 1 | 1 AC009065.2 | -- |
| ENSG00000207716 | 5.13E-15 | -2.63127 | 1 | 1 MIR572     | -- |
| ENSG00000207717 | 5.13E-15 | -2.63127 | 1 | 1 MIR551B    | -- |
| ENSG00000207719 | 5.13E-15 | -2.63127 | 1 | 1 MIR623     | -- |
| ENSG00000207720 | 5.13E-15 | -2.63127 | 1 | 1 MIR555     | -- |
| ENSG00000207722 | 5.13E-15 | -2.63127 | 1 | 1 MIR520B    | -- |
| ENSG00000207725 | 5.13E-15 | -2.63127 | 1 | 1 MIR222     | -- |
| ENSG00000207726 | 5.13E-15 | -2.63127 | 1 | 1 MIR455     | -- |
| ENSG00000207728 | 5.13E-15 | -2.63127 | 1 | 1 MIR449B    | -- |
| ENSG00000207729 | 5.13E-15 | -2.63127 | 1 | 1 MIR556     | -- |
| ENSG00000207730 | 5.13E-15 | -2.63127 | 1 | 1 MIR200B    | -- |
| ENSG00000207731 | 5.13E-15 | -2.63127 | 1 | 1 MIR506     | -- |
| ENSG00000207732 | 5.13E-15 | -2.63127 | 1 | 1 MIR218-1   | -- |
| ENSG00000207733 | 5.13E-15 | -2.63127 | 1 | 1 MIR637     | -- |
| ENSG00000207734 | 5.13E-15 | -2.63127 | 1 | 1 MIR517A    | -- |
| ENSG00000207735 | 5.13E-15 | -2.63127 | 1 | 1 MIR520D    | -- |
| ENSG00000207738 | 5.13E-15 | -2.63127 | 1 | 1 MIR520C    | -- |
| ENSG00000207739 | 5.13E-15 | -2.63127 | 1 | 1 MIR218-2   | -- |
| ENSG00000207741 | 5.13E-15 | -2.63127 | 1 | 1 MIR590     | -- |
| ENSG00000207742 | 5.13E-15 | -2.63127 | 1 | 1 MIR382     | -- |
| ENSG00000207743 | 5.13E-15 | -2.63127 | 1 | 1 MIR495     | -- |
| ENSG00000207744 | 5.13E-15 | -2.63127 | 1 | 1 MIR10B     | -- |
| ENSG00000207746 | 5.13E-15 | -2.63127 | 1 | 1 MIR575     | -- |
| ENSG00000207747 | 5.13E-15 | -2.63127 | 1 | 1 MIR518D    | -- |
| ENSG00000207749 | 5.13E-15 | -2.63127 | 1 | 1 MIR299     | -- |
| ENSG00000207750 | 5.13E-15 | -2.63127 | 1 | 1 MIR553     | -- |
| ENSG00000207752 | 5.13E-15 | -2.63127 | 1 | 1 MIR199A1   | -- |
| ENSG00000207753 | 5.13E-15 | -2.63127 | 1 | 1 MIR452     | -- |

|                 |          |          |   |              |    |
|-----------------|----------|----------|---|--------------|----|
| ENSG00000207754 | 5.13E-15 | -2.63127 | 1 | 1 MIR487B    | -- |
| ENSG00000207756 | 5.13E-15 | -2.63127 | 1 | 1 MIR580     | -- |
| ENSG00000207758 | 5.13E-15 | -2.63127 | 1 | 1 MIR532     | -- |
| ENSG00000207759 | 5.13E-15 | -2.63127 | 1 | 1 MIR181A1   | -- |
| ENSG00000207761 | 5.13E-15 | -2.63127 | 1 | 1 MIR329-1   | -- |
| ENSG00000207762 | 5.13E-15 | -2.63127 | 1 | 1 MIR329-2   | -- |
| ENSG00000207763 | 5.13E-15 | -2.63127 | 1 | 1 MIR617     | -- |
| ENSG00000207764 | 5.13E-15 | -2.63127 | 1 | 1 MIR133A2   | -- |
| ENSG00000207765 | 5.13E-15 | -2.63127 | 1 | 1 AL132780.1 | -- |
| ENSG00000207766 | 5.13E-15 | -2.63127 | 1 | 1 MIR626     | -- |
| ENSG00000207767 | 5.13E-15 | -2.63127 | 1 | 1 MIR516A1   | -- |
| ENSG00000207768 | 5.13E-15 | -2.63127 | 1 | 1 MIR188     | -- |
| ENSG00000207769 | 5.13E-15 | -2.63127 | 1 | 1 MIR586     | -- |
| ENSG00000207773 | 5.13E-15 | -2.63127 | 1 | 1 MIR642A    | -- |
| ENSG00000207775 | 5.13E-15 | -2.63127 | 1 | 1 MIR548A1   | -- |
| ENSG00000207776 | 5.13E-15 | -2.63127 | 1 | 1 MIR551A    | -- |
| ENSG00000207778 | 5.13E-15 | -2.63127 | 1 | 1 MIR122     | -- |
| ENSG00000207779 | 5.13E-15 | -2.63127 | 1 | 1 MIR15B     | -- |
| ENSG00000207780 | 5.13E-15 | -2.63127 | 1 | 1 MIR648     | -- |
| ENSG00000207781 | 5.13E-15 | -2.63127 | 1 | 1 MIR625     | -- |
| ENSG00000207782 | 5.13E-15 | -2.63127 | 1 | 1 MIR150     | -- |
| ENSG00000207783 | 5.13E-15 | -2.63127 | 1 | 1 MIR564     | -- |
| ENSG00000207784 | 5.13E-15 | -2.63127 | 1 | 1 MIR542     | -- |
| ENSG00000207785 | 5.13E-15 | -2.63127 | 1 | 1 MIR500A    | -- |
| ENSG00000207788 | 5.13E-15 | -2.63127 | 1 | 1 MIR519C    | -- |
| ENSG00000207789 | 5.13E-15 | -2.63127 | 1 | 1 MIR26A2    | -- |
| ENSG00000207797 | 5.13E-15 | -2.63127 | 1 | 1 MIR187     | -- |
| ENSG00000207798 | 5.13E-15 | -2.63127 | 1 | 1 MIR216A    | -- |
| ENSG00000207799 | 5.13E-15 | -2.63127 | 1 | 1 MIR520G    | -- |
| ENSG00000207800 | 5.13E-15 | -2.63127 | 1 | 1 MIR504     | -- |
| ENSG00000207802 | 5.13E-15 | -2.63127 | 1 | 1 MIR646     | -- |
| ENSG00000207803 | 5.13E-15 | -2.63127 | 1 | 1 MIR518A1   | -- |
| ENSG00000207804 | 5.13E-15 | -2.63127 | 1 | 1 MIR599     | -- |
| ENSG00000207805 | 5.13E-15 | -2.63127 | 1 | 1 MIR483     | -- |
| ENSG00000207806 | 5.13E-15 | -2.63127 | 1 | 1 MIR522     | -- |
| ENSG00000207807 | 5.13E-15 | -2.63127 | 1 | 1 MIR95      | -- |
| ENSG00000207810 | 5.13E-15 | -2.63127 | 1 | 1 MIR519E    | -- |
| ENSG00000207811 | 5.13E-15 | -2.63127 | 1 | 1 MIR34B     | -- |
| ENSG00000207812 | 5.13E-15 | -2.63127 | 1 | 1 MIR19B2    | -- |
| ENSG00000207813 | 5.13E-15 | -2.63127 | 1 | 1 MIR605     | -- |
| ENSG00000207816 | 5.13E-15 | -2.63127 | 1 | 1 MIR124-2   | -- |
| ENSG00000207817 | 5.13E-15 | -2.63127 | 1 | 1 MIR614     | -- |
| ENSG00000207818 | 5.13E-15 | -2.63127 | 1 | 1 MIR105-2   | -- |
| ENSG00000207819 | 5.13E-15 | -2.63127 | 1 | 1 MIR9-3     | -- |
| ENSG00000207820 | 5.13E-15 | -2.63127 | 1 | 1 MIR545     | -- |
| ENSG00000207821 | 5.13E-15 | -2.63127 | 1 | 1 MIR640     | -- |
| ENSG00000207825 | 5.13E-15 | -2.63127 | 1 | 1 MIR519B    | -- |
| ENSG00000207826 | 5.13E-15 | -2.63127 | 1 | 1 MIR596     | -- |
| ENSG00000207827 | 5.13E-15 | -2.63127 | 1 | 1 MIR30A     | -- |
| ENSG00000207830 | 5.13E-15 | -2.63127 | 1 | 1 D86994.1   | -- |
| ENSG00000207832 | 5.13E-15 | -2.63127 | 1 | 1 D87024.1   | -- |
| ENSG00000207833 | 5.13E-15 | -2.63127 | 1 | 1 D86998.1   | -- |
| ENSG00000207834 | 5.13E-15 | -2.63127 | 1 | 1 D86994.2   | -- |
| ENSG00000207835 | 5.13E-15 | -2.63127 | 1 | 1 D87015.1   | -- |
| ENSG00000207836 | 5.13E-15 | -2.63127 | 1 | 1 MIR650     | -- |
| ENSG00000207837 | 5.13E-15 | -2.63127 | 1 | 1 MIR517B    | -- |
| ENSG00000207838 | 5.13E-15 | -2.63127 | 1 | 1 MIR517C    | -- |
| ENSG00000207844 | 5.13E-15 | -2.63127 | 1 | 1 AC061975.8 | -- |

|                 |          |          |   |   |            |    |
|-----------------|----------|----------|---|---|------------|----|
| ENSG00000207846 | 5.13E-15 | -2.63127 | 1 | 1 | AL035088.1 | -- |
| ENSG00000207849 | 5.13E-15 | -2.63127 | 1 | 1 | AC108867.1 | -- |
| ENSG00000207857 | 5.13E-15 | -2.63127 | 1 | 1 | AC097639.1 | -- |
| ENSG00000207858 | 5.13E-15 | -2.63127 | 1 | 1 | MIR622     | -- |
| ENSG00000207861 | 5.13E-15 | -2.63127 | 1 | 1 | MIR520H    | -- |
| ENSG00000207862 | 5.13E-15 | -2.63127 | 1 | 1 | MIR518B    | -- |
| ENSG00000207863 | 5.13E-15 | -2.63127 | 1 | 1 | MIR125B2   | -- |
| ENSG00000207865 | 5.13E-15 | -2.63127 | 1 | 1 | MIR34A     | -- |
| ENSG00000207866 | 5.13E-15 | -2.63127 | 1 | 1 | MIR514A2   | -- |
| ENSG00000207867 | 5.13E-15 | -2.63127 | 1 | 1 | MIR514A3   | -- |
| ENSG00000207868 | 5.13E-15 | -2.63127 | 1 | 1 | MIR514A1   | -- |
| ENSG00000207869 | 5.13E-15 | -2.63127 | 1 | 1 | MIR498     | -- |
| ENSG00000207870 | 5.13E-15 | -2.63127 | 1 | 1 | MIR221     | -- |
| ENSG00000207871 | 5.13E-15 | -2.63127 | 1 | 1 | MIR513B    | -- |
| ENSG00000207873 | 5.13E-15 | -2.63127 | 1 | 1 | MIR513A1   | -- |
| ENSG00000207875 | 5.13E-15 | -2.63127 | 1 | 1 | MIRLET7B   | -- |
| ENSG00000207895 | 5.13E-15 | -2.63127 | 1 | 1 | AL161652.1 | -- |
| ENSG00000207922 | 5.13E-15 | -2.63127 | 1 | 1 | MIR566     | -- |
| ENSG00000207923 | 5.13E-15 | -2.63127 | 1 | 1 | MIR559     | -- |
| ENSG00000207925 | 5.13E-15 | -2.63127 | 1 | 1 | MIR516B2   | -- |
| ENSG00000207926 | 5.13E-15 | -2.63127 | 1 | 1 | MIR135A1   | -- |
| ENSG00000207927 | 5.13E-15 | -2.63127 | 1 | 1 | MIR302A    | -- |
| ENSG00000207928 | 5.13E-15 | -2.63127 | 1 | 1 | MIR632     | -- |
| ENSG00000207930 | 5.13E-15 | -2.63127 | 1 | 1 | MIR603     | -- |
| ENSG00000207931 | 5.13E-15 | -2.63127 | 1 | 1 | MIR577     | -- |
| ENSG00000207932 | 5.13E-15 | -2.63127 | 1 | 1 | MIR33A     | -- |
| ENSG00000207933 | 5.13E-15 | -2.63127 | 1 | 1 | MIR9-1     | -- |
| ENSG00000207934 | 5.13E-15 | -2.63127 | 1 | 1 | MIR654     | -- |
| ENSG00000207935 | 5.13E-15 | -2.63127 | 1 | 1 | MIR204     | -- |
| ENSG00000207937 | 5.13E-15 | -2.63127 | 1 | 1 | MIR511-1   | -- |
| ENSG00000207938 | 5.13E-15 | -2.63127 | 1 | 1 | MIR511-2   | -- |
| ENSG00000207939 | 5.13E-15 | -2.63127 | 1 | 1 | MIR223     | -- |
| ENSG00000207940 | 5.13E-15 | -2.63127 | 1 | 1 | MIR567     | -- |
| ENSG00000207941 | 5.13E-15 | -2.63127 | 1 | 1 | MIR552     | -- |
| ENSG00000207942 | 5.13E-15 | -2.63127 | 1 | 1 | MIR136     | -- |
| ENSG00000207943 | 5.13E-15 | -2.63127 | 1 | 1 | MIR634     | -- |
| ENSG00000207945 | 5.13E-15 | -2.63127 | 1 | 1 | MIR658     | -- |
| ENSG00000207946 | 5.13E-15 | -2.63127 | 1 | 1 | MIR516B1   | -- |
| ENSG00000207947 | 5.13E-15 | -2.63127 | 1 | 1 | MIR152     | -- |
| ENSG00000207948 | 5.13E-15 | -2.63127 | 1 | 1 | MIR328     | -- |
| ENSG00000207949 | 5.13E-15 | -2.63127 | 1 | 1 | MIR214     | -- |
| ENSG00000207951 | 5.13E-15 | -2.63127 | 1 | 1 | MIR561     | -- |
| ENSG00000207952 | 5.13E-15 | -2.63127 | 1 | 1 | MIR624     | -- |
| ENSG00000207954 | 5.13E-15 | -2.63127 | 1 | 1 | MIR138-1   | -- |
| ENSG00000207955 | 5.13E-15 | -2.63127 | 1 | 1 | MIR219-2   | -- |
| ENSG00000207957 | 5.13E-15 | -2.63127 | 1 | 1 | MIR105-1   | -- |
| ENSG00000207959 | 5.13E-15 | -2.63127 | 1 | 1 | MIR656     | -- |
| ENSG00000207960 | 5.13E-15 | -2.63127 | 1 | 1 | MIR153-2   | -- |
| ENSG00000207961 | 5.13E-15 | -2.63127 | 1 | 1 | MIR496     | -- |
| ENSG00000207962 | 5.13E-15 | -2.63127 | 1 | 1 | MIR30C1    | -- |
| ENSG00000207963 | 5.13E-15 | -2.63127 | 1 | 1 | MIR569     | -- |
| ENSG00000207964 | 5.13E-15 | -2.63127 | 1 | 1 | MIR628     | -- |
| ENSG00000207965 | 5.13E-15 | -2.63127 | 1 | 1 | MIR629     | -- |
| ENSG00000207967 | 5.13E-15 | -2.63127 | 1 | 1 | MIR620     | -- |
| ENSG00000207969 | 5.13E-15 | -2.63127 | 1 | 1 | MIR507     | -- |
| ENSG00000207970 | 5.13E-15 | -2.63127 | 1 | 1 | MIR660     | -- |
| ENSG00000207971 | 5.13E-15 | -2.63127 | 1 | 1 | MIR125B1   | -- |
| ENSG00000207972 | 5.13E-15 | -2.63127 | 1 | 1 | MIR638     | -- |



|                 |          |          |   |              |    |
|-----------------|----------|----------|---|--------------|----|
| ENSG00000207974 | 5.13E-15 | -2.63127 | 1 | 1 MIR557     | -- |
| ENSG00000207976 | 5.13E-15 | -2.63127 | 1 | 1 MIR607     | -- |
| ENSG00000207977 | 5.13E-15 | -2.63127 | 1 | 1 MIR524     | -- |
| ENSG00000207978 | 5.13E-15 | -2.63127 | 1 | 1 MIR154     | -- |
| ENSG00000207979 | 5.13E-15 | -2.63127 | 1 | 1 MIR527     | -- |
| ENSG00000207981 | 5.13E-15 | -2.63127 | 1 | 1 MIR519D    | -- |
| ENSG00000207982 | 5.13E-15 | -2.63127 | 1 | 1 MIR548B    | -- |
| ENSG00000207983 | 5.13E-15 | -2.63127 | 1 | 1 MIR613     | -- |
| ENSG00000207984 | 5.13E-15 | -2.63127 | 1 | 1 MIR513A2   | -- |
| ENSG00000207986 | 5.13E-15 | -2.63127 | 1 | 1 AC136932.1 | -- |
| ENSG00000207987 | 5.13E-15 | -2.63127 | 1 | 1 MIR518E    | -- |
| ENSG00000207989 | 5.13E-15 | -2.63127 | 1 | 1 MIR493     | -- |
| ENSG00000207990 | 5.13E-15 | -2.63127 | 1 | 1 MIR182     | -- |
| ENSG00000207991 | 5.13E-15 | -2.63127 | 1 | 1 MIR601     | -- |
| ENSG00000207992 | 5.13E-15 | -2.63127 | 1 | 1 MIR519A1   | -- |
| ENSG00000207993 | 5.13E-15 | -2.63127 | 1 | 1 MIR134     | -- |
| ENSG00000207994 | 5.13E-15 | -2.63127 | 1 | 1 MIR100     | -- |
| ENSG00000207995 | 5.13E-15 | -2.63127 | 1 | 1 MIR325     | -- |
| ENSG00000207996 | 5.13E-15 | -2.63127 | 1 | 1 MIR301A    | -- |
| ENSG00000208000 | 5.13E-15 | -2.63127 | 1 | 1 MIR509-1   | -- |
| ENSG00000208001 | 5.13E-15 | -2.63127 | 1 | 1 MIR431     | -- |
| ENSG00000208002 | 5.13E-15 | -2.63127 | 1 | 1 MIR643     | -- |
| ENSG00000208003 | 5.13E-15 | -2.63127 | 1 | 1 MIR549     | -- |
| ENSG00000208004 | 5.13E-15 | -2.63127 | 1 | 1 MIR323B    | -- |
| ENSG00000208006 | 5.13E-15 | -2.63127 | 1 | 1 MIR16-1    | -- |
| ENSG00000208008 | 5.13E-15 | -2.63127 | 1 | 1 MIR125A    | -- |
| ENSG00000208009 | 5.13E-15 | -2.63127 | 1 | 1 MIR130A    | -- |
| ENSG00000208012 | 5.13E-15 | -2.63127 | 1 | 1 MIRLET7F2  | -- |
| ENSG00000208013 | 5.13E-15 | -2.63127 | 1 | 1 MIR652     | -- |
| ENSG00000208014 | 5.13E-15 | -2.63127 | 1 | 1 MIR653     | -- |
| ENSG00000208015 | 5.13E-15 | -2.63127 | 1 | 1 MIR362     | -- |
| ENSG00000208016 | 5.13E-15 | -2.63127 | 1 | 1 MIR523     | -- |
| ENSG00000208017 | 5.13E-15 | -2.63127 | 1 | 1 MIR140     | -- |
| ENSG00000208022 | 5.13E-15 | -2.63127 | 1 | 1 MIR618     | -- |
| ENSG00000208023 | 5.13E-15 | -2.63127 | 1 | 1 MIR185     | -- |
| ENSG00000208024 | 5.13E-15 | -2.63127 | 1 | 1 MIR199A2   | -- |
| ENSG00000208025 | 5.13E-15 | -2.63127 | 1 | 1 MIR591     | -- |
| ENSG00000208027 | 5.13E-15 | -2.63127 | 1 | 1 MIR485     | -- |
| ENSG00000208032 | 5.13E-15 | -2.63127 | 1 | 1 MIR548A3   | -- |
| ENSG00000208033 | 5.13E-15 | -2.63127 | 1 | 1 MIR609     | -- |
| ENSG00000208034 | 5.13E-15 | -2.63127 | 1 | 1 MIR92A2    | -- |
| ENSG00000208035 | 5.13E-15 | -2.63127 | 1 | 1 MIR143     | -- |
| ENSG00000208037 | 5.13E-15 | -2.63127 | 1 | 1 MIR320A    | -- |
| ENSG00000208038 | 5.13E-15 | -2.63127 | 1 | 1 MIR492     | -- |
| ENSG00000208308 | 5.13E-15 | -2.63127 | 1 | 1 SNORA40    | -- |
| ENSG00000208797 | 5.13E-15 | -2.63127 | 1 | 1 SNORD73A   | -- |
| ENSG00000208839 | 5.13E-15 | -2.63127 | 1 | 1 SNORA35    | -- |
| ENSG00000208883 | 5.13E-15 | -2.63127 | 1 | 1 SNORD96B   | -- |
| ENSG00000208892 | 5.13E-15 | -2.63127 | 1 | 1 SNORA49    | -- |
| ENSG00000209082 | 5.13E-15 | -2.63127 | 1 | 1 MT-TL1     | -- |
| ENSG00000209480 | 5.13E-15 | -2.63127 | 1 | 1 SNORD83B   | -- |
| ENSG00000209582 | 5.13E-15 | -2.63127 | 1 | 1 SNORA48    | -- |
| ENSG00000209645 | 5.13E-15 | -2.63127 | 1 | 1 SNORD105   | -- |
| ENSG00000209702 | 5.13E-15 | -2.63127 | 1 | 1 SNORD41    | -- |
| ENSG00000210049 | 5.13E-15 | -2.63127 | 1 | 1 MT-TF      | -- |
| ENSG00000210077 | 5.13E-15 | -2.63127 | 1 | 1 MT-TV      | -- |
| ENSG00000210100 | 5.13E-15 | -2.63127 | 1 | 1 MT-TI      | -- |
| ENSG00000210107 | 5.13E-15 | -2.63127 | 1 | 1 MT-TQ      | -- |

|                 |          |          |   |               |   |
|-----------------|----------|----------|---|---------------|---|
| ENSG00000210112 | 5.13E-15 | -2.63127 | 1 | 1 MT-TM       | - |
| ENSG00000210117 | 5.13E-15 | -2.63127 | 1 | 1 MT-TW       | - |
| ENSG00000210127 | 5.13E-15 | -2.63127 | 1 | 1 MT-TA       | - |
| ENSG00000210135 | 5.13E-15 | -2.63127 | 1 | 1 MT-TN       | - |
| ENSG00000210140 | 5.13E-15 | -2.63127 | 1 | 1 MT-TC       | - |
| ENSG00000210144 | 5.13E-15 | -2.63127 | 1 | 1 MT-TY       | - |
| ENSG00000210151 | 5.13E-15 | -2.63127 | 1 | 1 MT-TS1      | - |
| ENSG00000210154 | 5.13E-15 | -2.63127 | 1 | 1 MT-TD       | - |
| ENSG00000210156 | 5.13E-15 | -2.63127 | 1 | 1 MT-TK       | - |
| ENSG00000210164 | 5.13E-15 | -2.63127 | 1 | 1 MT-TG       | - |
| ENSG00000210174 | 5.13E-15 | -2.63127 | 1 | 1 MT-TR       | - |
| ENSG00000210176 | 5.13E-15 | -2.63127 | 1 | 1 MT-TH       | - |
| ENSG00000210181 | 5.13E-15 | -2.63127 | 1 | 1 RNU6ATAC4P  | - |
| ENSG00000210184 | 5.13E-15 | -2.63127 | 1 | 1 MT-TS2      | - |
| ENSG00000210191 | 5.13E-15 | -2.63127 | 1 | 1 MT-TL2      | - |
| ENSG00000210194 | 5.13E-15 | -2.63127 | 1 | 1 MT-TE       | - |
| ENSG00000210195 | 5.13E-15 | -2.63127 | 1 | 1 MT-TT       | - |
| ENSG00000210678 | 5.13E-15 | -2.63127 | 1 | 1 RNU6ATAC2P  | - |
| ENSG00000210709 | 5.13E-15 | -2.63127 | 1 | 1 RNU6ATAC3P  | - |
| ENSG00000210741 | 5.13E-15 | -2.63127 | 1 | 1 MIR196A1    | - |
| ENSG00000210825 | 5.13E-15 | -2.63127 | 1 | 1 SNORA40     | - |
| ENSG00000210839 | 5.13E-15 | -2.63127 | 1 | 1 RNU6ATAC5P  | - |
| ENSG00000210841 | 5.13E-15 | -2.63127 | 1 | 1 RNU6ATAC26P | - |
| ENSG00000211137 | 5.13E-15 | -2.63127 | 1 | 1 MIR190A     | - |
| ENSG00000211482 | 5.13E-15 | -2.63127 | 1 | 1 AC092574.1  | - |
| ENSG00000211483 | 5.13E-15 | -2.63127 | 1 | 1 AC018450.1  | - |
| ENSG00000211495 | 5.13E-15 | -2.63127 | 1 | 1 AL009174.1  | - |
| ENSG00000211498 | 5.13E-15 | -2.63127 | 1 | 1 AC093311.1  | - |
| ENSG00000211499 | 5.13E-15 | -2.63127 | 1 | 1 AC110056.1  | - |
| ENSG00000211508 | 5.13E-15 | -2.63127 | 1 | 1 AL359538.1  | - |
| ENSG00000211510 | 5.13E-15 | -2.63127 | 1 | 1 AL590726.1  | - |
| ENSG00000211514 | 5.13E-15 | -2.63127 | 1 | 1 MIR454      | - |
| ENSG00000211515 | 5.13E-15 | -2.63127 | 1 | 1 AC079005.1  | - |
| ENSG00000211517 | 5.13E-15 | -2.63127 | 1 | 1 MIR671      | - |
| ENSG00000211518 | 5.13E-15 | -2.63127 | 1 | 1 AC006988.1  | - |
| ENSG00000211519 | 5.13E-15 | -2.63127 | 1 | 1 MIR147B     | - |
| ENSG00000211520 | 5.13E-15 | -2.63127 | 1 | 1 MIR216B     | - |
| ENSG00000211524 | 5.13E-15 | -2.63127 | 1 | 1 MIR718      | - |
| ENSG00000211525 | 5.13E-15 | -2.63127 | 1 | 1 BX323860.1  | - |
| ENSG00000211526 | 5.13E-15 | -2.63127 | 1 | 1 AL121869.1  | - |
| ENSG00000211528 | 5.13E-15 | -2.63127 | 1 | 1 AP001525.1  | - |
| ENSG00000211530 | 5.13E-15 | -2.63127 | 1 | 1 AL354933.1  | - |
| ENSG00000211532 | 5.13E-15 | -2.63127 | 1 | 1 MIR526A2    | - |
| ENSG00000211534 | 5.13E-15 | -2.63127 | 1 | 1 AL121588.1  | - |
| ENSG00000211535 | 5.13E-15 | -2.63127 | 1 | 1 MIR711      | - |
| ENSG00000211538 | 5.13E-15 | -2.63127 | 1 | 1 MIR501      | - |
| ENSG00000211542 | 5.13E-15 | -2.63127 | 1 | 1 AC007436.1  | - |
| ENSG00000211543 | 5.13E-15 | -2.63127 | 1 | 1 MIR320B1    | - |
| ENSG00000211544 | 5.13E-15 | -2.63127 | 1 | 1 AC069286.1  | - |
| ENSG00000211553 | 5.13E-15 | -2.63127 | 1 | 1 AC118278.1  | - |
| ENSG00000211554 | 5.13E-15 | -2.63127 | 1 | 1 AC096645.1  | - |
| ENSG00000211556 | 5.13E-15 | -2.63127 | 1 | 1 AL157702.1  | - |
| ENSG00000211562 | 5.13E-15 | -2.63127 | 1 | 1 AC103686.1  | - |
| ENSG00000211563 | 5.13E-15 | -2.63127 | 1 | 1 MIR338      | - |
| ENSG00000211566 | 5.13E-15 | -2.63127 | 1 | 1 AC114788.1  | - |
| ENSG00000211568 | 5.13E-15 | -2.63127 | 1 | 1 MIR670      | - |
| ENSG00000211571 | 5.13E-15 | -2.63127 | 1 | 1 AC010525.2  | - |
| ENSG00000211573 | 5.13E-15 | -2.63127 | 1 | 1 AC125238.1  | - |

|                 |          |          |   |              |        |
|-----------------|----------|----------|---|--------------|--------|
| ENSG00000211574 | 5.13E-15 | -2.63127 | 1 | 1 MIR770     | --     |
| ENSG00000211575 | 5.13E-15 | -2.63127 | 1 | 1 MIR760     | --     |
| ENSG00000211577 | 5.13E-15 | -2.63127 | 1 | 1 AC090673.1 | --     |
| ENSG00000211578 | 5.13E-15 | -2.63127 | 1 | 1 MIR766     | --     |
| ENSG00000211579 | 5.13E-15 | -2.63127 | 1 | 1 MIR759     | --     |
| ENSG00000211580 | 5.13E-15 | -2.63127 | 1 | 1 MIR769     | --     |
| ENSG00000211582 | 5.13E-15 | -2.63127 | 1 | 1 MIR758     | --     |
| ENSG00000211583 | 5.13E-15 | -2.63127 | 1 | 1 MIR767     | --     |
| ENSG00000211588 | 5.13E-15 | -2.63127 | 1 | 1 AL023913.1 | --     |
| ENSG00000211590 | 5.13E-15 | -2.63127 | 1 | 1 MIR802     | --     |
| ENSG00000211591 | 5.13E-15 | -2.63127 | 1 | 1 MIR762     | --     |
| ENSG00000211592 | 5.13E-15 | -2.63127 | 1 | 1 IGKC       | --     |
| ENSG00000211593 | 5.13E-15 | -2.63127 | 1 | 1 IGKJ5      | --     |
| ENSG00000211594 | 5.13E-15 | -2.63127 | 1 | 1 IGKJ4      | --     |
| ENSG00000211595 | 5.13E-15 | -2.63127 | 1 | 1 IGKJ3      | --     |
| ENSG00000211596 | 5.13E-15 | -2.63127 | 1 | 1 IGKJ2      | --     |
| ENSG00000211597 | 5.13E-15 | -2.63127 | 1 | 1 IGKJ1      | --     |
| ENSG00000211598 | 5.13E-15 | -2.63127 | 1 | 1 IGKV4-1    | --     |
| ENSG00000211599 | 5.13E-15 | -2.63127 | 1 | 1 IGKV5-2    | --     |
| ENSG00000211611 | 5.13E-15 | -2.63127 | 1 | 1 IGKV6-21   | --     |
| ENSG00000211619 | 5.13E-15 | -2.63127 | 1 | 1 IGKV2-40   | --     |
| ENSG00000211623 | 5.13E-15 | -2.63127 | 1 | 1 IGKV2D-26  | --     |
| ENSG00000211625 | 5.13E-15 | -2.63127 | 1 | 1 IGKV3D-20  | --     |
| ENSG00000211626 | 5.13E-15 | -2.63127 | 1 | 1 IGKV6D-41  | --     |
| ENSG00000211630 | 5.13E-15 | -2.63127 | 1 | 1 IGKV1D-13  | --     |
| ENSG00000211632 | 5.13E-15 | -2.63127 | 1 | 1 IGKV3D-11  | --     |
| ENSG00000211633 | 5.13E-15 | -2.63127 | 1 | 1 IGKV1D-42  | --     |
| ENSG00000211637 | 5.13E-15 | -2.63127 | 1 | 1 IGLV4-69   | K06553 |
| ENSG00000211638 | 5.13E-15 | -2.63127 | 1 | 1 IGLV8-61   | --     |
| ENSG00000211639 | 5.13E-15 | -2.63127 | 1 | 1 IGLV4-60   | --     |
| ENSG00000211640 | 5.13E-15 | -2.63127 | 1 | 1 IGLV6-57   | K06553 |
| ENSG00000211641 | 5.13E-15 | -2.63127 | 1 | 1 IGLV11-55  | K06553 |
| ENSG00000211642 | 5.13E-15 | -2.63127 | 1 | 1 IGLV10-54  | K06553 |
| ENSG00000211643 | 5.13E-15 | -2.63127 | 1 | 1 IGLV5-52   | K06553 |
| ENSG00000211645 | 5.13E-15 | -2.63127 | 1 | 1 IGLV1-50   | --     |
| ENSG00000211647 | 5.13E-15 | -2.63127 | 1 | 1 IGLV5-48   | K06553 |
| ENSG00000211648 | 5.13E-15 | -2.63127 | 1 | 1 IGLV1-47   | --     |
| ENSG00000211649 | 5.13E-15 | -2.63127 | 1 | 1 IGLV7-46   | --     |
| ENSG00000211650 | 5.13E-15 | -2.63127 | 1 | 1 IGLV5-45   | K06553 |
| ENSG00000211651 | 5.13E-15 | -2.63127 | 1 | 1 IGLV1-44   | --     |
| ENSG00000211652 | 5.13E-15 | -2.63127 | 1 | 1 IGLV7-43   | --     |
| ENSG00000211653 | 5.13E-15 | -2.63127 | 1 | 1 IGLV1-40   | --     |
| ENSG00000211654 | 5.13E-15 | -2.63127 | 1 | 1 IGLV5-37   | K06553 |
| ENSG00000211655 | 5.13E-15 | -2.63127 | 1 | 1 IGLV1-36   | --     |
| ENSG00000211656 | 5.13E-15 | -2.63127 | 1 | 1 IGLV2-33   | --     |
| ENSG00000211657 | 5.13E-15 | -2.63127 | 1 | 1 IGLV3-32   | K06554 |
| ENSG00000211658 | 5.13E-15 | -2.63127 | 1 | 1 IGLV3-27   | K06554 |
| ENSG00000211659 | 5.13E-15 | -2.63127 | 1 | 1 IGLV3-25   | K06554 |
| ENSG00000211660 | 5.13E-15 | -2.63127 | 1 | 1 IGLV2-23   | K06553 |
| ENSG00000211661 | 5.13E-15 | -2.63127 | 1 | 1 IGLV3-22   | --     |
| ENSG00000211662 | 5.13E-15 | -2.63127 | 1 | 1 IGLV3-21   | K06554 |
| ENSG00000211663 | 5.13E-15 | -2.63127 | 1 | 1 IGLV3-19   | --     |
| ENSG00000211664 | 5.13E-15 | -2.63127 | 1 | 1 IGLV2-18   | K06553 |
| ENSG00000211665 | 5.13E-15 | -2.63127 | 1 | 1 IGLV3-16   | K06554 |
| ENSG00000211666 | 5.13E-15 | -2.63127 | 1 | 1 IGLV2-14   | K06553 |
| ENSG00000211667 | 5.13E-15 | -2.63127 | 1 | 1 IGLV3-12   | K06554 |
| ENSG00000211668 | 5.13E-15 | -2.63127 | 1 | 1 IGLV2-11   | --     |
| ENSG00000211669 | 5.13E-15 | -2.63127 | 1 | 1 IGLV3-10   | --     |

|                 |          |          |   |            |        |
|-----------------|----------|----------|---|------------|--------|
| ENSG00000211670 | 5.13E-15 | -2.63127 | 1 | 1 IGLV3-9  | K06554 |
| ENSG00000211671 | 5.13E-15 | -2.63127 | 1 | 1 IGLV2-8  | -      |
| ENSG00000211672 | 5.13E-15 | -2.63127 | 1 | 1 IGLV4-3  | -      |
| ENSG00000211673 | 5.13E-15 | -2.63127 | 1 | 1 IGLV3-1  | K06554 |
| ENSG00000211674 | 5.13E-15 | -2.63127 | 1 | 1 IGLJ1    | -      |
| ENSG00000211675 | 5.13E-15 | -2.63127 | 1 | 1 IGLC1    | K06554 |
| ENSG00000211676 | 5.13E-15 | -2.63127 | 1 | 1 IGLJ2    | -      |
| ENSG00000211677 | 5.13E-15 | -2.63127 | 1 | 1 IGLC2    | K06554 |
| ENSG00000211678 | 5.13E-15 | -2.63127 | 1 | 1 IGLJ3    | -      |
| ENSG00000211679 | 5.13E-15 | -2.63127 | 1 | 1 IGLC3    | K06554 |
| ENSG00000211680 | 5.13E-15 | -2.63127 | 1 | 1 IGLJ4    | -      |
| ENSG00000211681 | 5.13E-15 | -2.63127 | 1 | 1 IGLJ5    | -      |
| ENSG00000211682 | 5.13E-15 | -2.63127 | 1 | 1 IGLJ6    | -      |
| ENSG00000211684 | 5.13E-15 | -2.63127 | 1 | 1 IGLJ7    | -      |
| ENSG00000211685 | 5.13E-15 | -2.63127 | 1 | 1 IGLC7    | K06554 |
| ENSG00000211687 | 5.13E-15 | -2.63127 | 1 | 1 TRGJ2    | -      |
| ENSG00000211688 | 5.13E-15 | -2.63127 | 1 | 1 TRGJP2   | -      |
| ENSG00000211690 | 5.13E-15 | -2.63127 | 1 | 1 TRGJ1    | -      |
| ENSG00000211691 | 5.13E-15 | -2.63127 | 1 | 1 TRGJP    | -      |
| ENSG00000211692 | 5.13E-15 | -2.63127 | 1 | 1 TRGJP1   | -      |
| ENSG00000211693 | 5.13E-15 | -2.63127 | 1 | 1 TRGV11   | -      |
| ENSG00000211694 | 5.13E-15 | -2.63127 | 1 | 1 TRGV10   | -      |
| ENSG00000211695 | 5.13E-15 | -2.63127 | 1 | 1 TRGV9    | -      |
| ENSG00000211696 | 5.13E-15 | -2.63127 | 1 | 1 TRGV8    | -      |
| ENSG00000211697 | 5.13E-15 | -2.63127 | 1 | 1 TRGV5    | -      |
| ENSG00000211698 | 5.13E-15 | -2.63127 | 1 | 1 TRGV4    | -      |
| ENSG00000211699 | 5.13E-15 | -2.63127 | 1 | 1 TRGV3    | -      |
| ENSG00000211701 | 5.13E-15 | -2.63127 | 1 | 1 TRGV1    | -      |
| ENSG00000211706 | 5.13E-15 | -2.63127 | 1 | 1 TRBV6-1  | K10785 |
| ENSG00000211707 | 5.13E-15 | -2.63127 | 1 | 1 TRBV7-1  | -      |
| ENSG00000211710 | 5.13E-15 | -2.63127 | 1 | 1 TRBV4-1  | -      |
| ENSG00000211713 | 5.13E-15 | -2.63127 | 1 | 1 TRBV6-4  | -      |
| ENSG00000211714 | 5.13E-15 | -2.63127 | 1 | 1 TRBV7-3  | -      |
| ENSG00000211715 | 5.13E-15 | -2.63127 | 1 | 1 TRBV5-3  | K10785 |
| ENSG00000211716 | 5.13E-15 | -2.63127 | 1 | 1 TRBV9    | K10785 |
| ENSG00000211717 | 5.13E-15 | -2.63127 | 1 | 1 TRBV10-1 | K10785 |
| ENSG00000211720 | 5.13E-15 | -2.63127 | 1 | 1 TRBV11-1 | -      |
| ENSG00000211721 | 5.13E-15 | -2.63127 | 1 | 1 TRBV6-5  | -      |
| ENSG00000211724 | 5.13E-15 | -2.63127 | 1 | 1 TRBV6-6  | -      |
| ENSG00000211725 | 5.13E-15 | -2.63127 | 1 | 1 TRBV5-5  | K10785 |
| ENSG00000211727 | 5.13E-15 | -2.63127 | 1 | 1 TRBV7-6  | -      |
| ENSG00000211728 | 5.13E-15 | -2.63127 | 1 | 1 TRBV5-6  | K10785 |
| ENSG00000211731 | 5.13E-15 | -2.63127 | 1 | 1 TRBV5-7  | K10785 |
| ENSG00000211732 | 5.13E-15 | -2.63127 | 1 | 1 TRBV6-9  | -      |
| ENSG00000211734 | 5.13E-15 | -2.63127 | 1 | 1 TRBV5-1  | K10785 |
| ENSG00000211739 | 5.13E-15 | -2.63127 | 1 | 1 TRBV12-2 | -      |
| ENSG00000211745 | 5.13E-15 | -2.63127 | 1 | 1 TRBV4-2  | -      |
| ENSG00000211746 | 5.13E-15 | -2.63127 | 1 | 1 TRBV19   | -      |
| ENSG00000211747 | 5.13E-15 | -2.63127 | 1 | 1 TRBV20-1 | -      |
| ENSG00000211749 | 5.13E-15 | -2.63127 | 1 | 1 TRBV23-1 | -      |
| ENSG00000211750 | 5.13E-15 | -2.63127 | 1 | 1 TRBV24-1 | K10785 |
| ENSG00000211751 | 5.13E-15 | -2.63127 | 1 | 1 TRBV25-1 | -      |
| ENSG00000211752 | 5.13E-15 | -2.63127 | 1 | 1 TRBV27   | -      |
| ENSG00000211753 | 5.13E-15 | -2.63127 | 1 | 1 TRBV28   | -      |
| ENSG00000211764 | 5.13E-15 | -2.63127 | 1 | 1 TRBJ2-1  | -      |
| ENSG00000211765 | 5.13E-15 | -2.63127 | 1 | 1 TRBJ2-2  | -      |
| ENSG00000211766 | 5.13E-15 | -2.63127 | 1 | 1 TRBJ2-2P | -      |
| ENSG00000211767 | 5.13E-15 | -2.63127 | 1 | 1 TRBJ2-3  | -      |

|                 |          |          |   |               |        |
|-----------------|----------|----------|---|---------------|--------|
| ENSG00000211768 | 5.13E-15 | -2.63127 | 1 | 1 TRBJ2-4     | --     |
| ENSG00000211769 | 5.13E-15 | -2.63127 | 1 | 1 TRBJ2-5     | --     |
| ENSG00000211770 | 5.13E-15 | -2.63127 | 1 | 1 TRBJ2-6     | --     |
| ENSG00000211771 | 5.13E-15 | -2.63127 | 1 | 1 TRBJ2-7     | --     |
| ENSG00000211772 | 5.13E-15 | -2.63127 | 1 | 1 TRBC2       | K10785 |
| ENSG00000211776 | 5.13E-15 | -2.63127 | 1 | 1 TRAV2       | --     |
| ENSG00000211777 | 5.13E-15 | -2.63127 | 1 | 1 TRAV3       | --     |
| ENSG00000211778 | 5.13E-15 | -2.63127 | 1 | 1 TRAV4       | --     |
| ENSG00000211779 | 5.13E-15 | -2.63127 | 1 | 1 TRAV5       | --     |
| ENSG00000211780 | 5.13E-15 | -2.63127 | 1 | 1 TRAV6       | --     |
| ENSG00000211781 | 5.13E-15 | -2.63127 | 1 | 1 TRAV7       | --     |
| ENSG00000211782 | 5.13E-15 | -2.63127 | 1 | 1 TRAV8-1     | --     |
| ENSG00000211783 | 5.13E-15 | -2.63127 | 1 | 1 TRAV9-1     | K10784 |
| ENSG00000211784 | 5.13E-15 | -2.63127 | 1 | 1 TRAV10      | --     |
| ENSG00000211785 | 5.13E-15 | -2.63127 | 1 | 1 TRAV12-1    | --     |
| ENSG00000211786 | 5.13E-15 | -2.63127 | 1 | 1 TRAV8-2     | --     |
| ENSG00000211787 | 5.13E-15 | -2.63127 | 1 | 1 TRAV8-3     | --     |
| ENSG00000211788 | 5.13E-15 | -2.63127 | 1 | 1 TRAV13-1    | --     |
| ENSG00000211789 | 5.13E-15 | -2.63127 | 1 | 1 TRAV12-2    | --     |
| ENSG00000211790 | 5.13E-15 | -2.63127 | 1 | 1 TRAV8-4     | --     |
| ENSG00000211791 | 5.13E-15 | -2.63127 | 1 | 1 TRAV13-2    | --     |
| ENSG00000211792 | 5.13E-15 | -2.63127 | 1 | 1 TRAV14DV4   | --     |
| ENSG00000211793 | 5.13E-15 | -2.63127 | 1 | 1 TRAV9-2     | K10784 |
| ENSG00000211794 | 5.13E-15 | -2.63127 | 1 | 1 TRAV12-3    | --     |
| ENSG00000211795 | 5.13E-15 | -2.63127 | 1 | 1 TRAV8-6     | --     |
| ENSG00000211796 | 5.13E-15 | -2.63127 | 1 | 1 TRAV16      | --     |
| ENSG00000211797 | 5.13E-15 | -2.63127 | 1 | 1 TRAV17      | --     |
| ENSG00000211798 | 5.13E-15 | -2.63127 | 1 | 1 TRAV18      | --     |
| ENSG00000211799 | 5.13E-15 | -2.63127 | 1 | 1 TRAV19      | --     |
| ENSG00000211800 | 5.13E-15 | -2.63127 | 1 | 1 TRAV20      | --     |
| ENSG00000211801 | 5.13E-15 | -2.63127 | 1 | 1 TRAV21      | --     |
| ENSG00000211802 | 5.13E-15 | -2.63127 | 1 | 1 TRAV22      | --     |
| ENSG00000211803 | 5.13E-15 | -2.63127 | 1 | 1 TRAV23DV6   | K10784 |
| ENSG00000211804 | 5.13E-15 | -2.63127 | 1 | 1 TRDV1       | --     |
| ENSG00000211805 | 5.13E-15 | -2.63127 | 1 | 1 TRAV24      | --     |
| ENSG00000211806 | 5.13E-15 | -2.63127 | 1 | 1 TRAV25      | --     |
| ENSG00000211807 | 5.13E-15 | -2.63127 | 1 | 1 TRAV26-1    | --     |
| ENSG00000211808 | 5.13E-15 | -2.63127 | 1 | 1 TRAV8-7     | --     |
| ENSG00000211809 | 5.13E-15 | -2.63127 | 1 | 1 TRAV27      | --     |
| ENSG00000211810 | 5.13E-15 | -2.63127 | 1 | 1 TRAV29DV5   | --     |
| ENSG00000211812 | 5.13E-15 | -2.63127 | 1 | 1 TRAV26-2    | --     |
| ENSG00000211813 | 5.13E-15 | -2.63127 | 1 | 1 TRAV34      | --     |
| ENSG00000211814 | 5.13E-15 | -2.63127 | 1 | 1 TRAV35      | --     |
| ENSG00000211815 | 5.13E-15 | -2.63127 | 1 | 1 TRAV36DV7   | --     |
| ENSG00000211816 | 5.13E-15 | -2.63127 | 1 | 1 TRAV38-1    | --     |
| ENSG00000211817 | 5.13E-15 | -2.63127 | 1 | 1 TRAV38-2DV8 | --     |
| ENSG00000211818 | 5.13E-15 | -2.63127 | 1 | 1 TRAV39      | --     |
| ENSG00000211819 | 5.13E-15 | -2.63127 | 1 | 1 TRAV40      | --     |
| ENSG00000211820 | 5.13E-15 | -2.63127 | 1 | 1 TRAV41      | --     |
| ENSG00000211821 | 5.13E-15 | -2.63127 | 1 | 1 TRDV2       | --     |
| ENSG00000211825 | 5.13E-15 | -2.63127 | 1 | 1 TRDJ1       | --     |
| ENSG00000211826 | 5.13E-15 | -2.63127 | 1 | 1 TRDJ4       | --     |
| ENSG00000211827 | 5.13E-15 | -2.63127 | 1 | 1 TRDJ2       | --     |
| ENSG00000211828 | 5.13E-15 | -2.63127 | 1 | 1 TRDJ3       | --     |
| ENSG00000211829 | 5.13E-15 | -2.63127 | 1 | 1 TRDC        | --     |
| ENSG00000211831 | 5.13E-15 | -2.63127 | 1 | 1 TRAJ61      | --     |
| ENSG00000211832 | 5.13E-15 | -2.63127 | 1 | 1 TRAJ59      | --     |
| ENSG00000211833 | 5.13E-15 | -2.63127 | 1 | 1 TRAJ58      | --     |

|                 |          |          |   |          |        |
|-----------------|----------|----------|---|----------|--------|
| ENSG00000211834 | 5.13E-15 | -2.63127 | 1 | 1 TRAJ57 | -      |
| ENSG00000211835 | 5.13E-15 | -2.63127 | 1 | 1 TRAJ56 | -      |
| ENSG00000211836 | 5.13E-15 | -2.63127 | 1 | 1 TRAJ54 | -      |
| ENSG00000211837 | 5.13E-15 | -2.63127 | 1 | 1 TRAJ53 | -      |
| ENSG00000211838 | 5.13E-15 | -2.63127 | 1 | 1 TRAJ52 | -      |
| ENSG00000211839 | 5.13E-15 | -2.63127 | 1 | 1 TRAJ50 | -      |
| ENSG00000211840 | 5.13E-15 | -2.63127 | 1 | 1 TRAJ49 | -      |
| ENSG00000211841 | 5.13E-15 | -2.63127 | 1 | 1 TRAJ48 | -      |
| ENSG00000211842 | 5.13E-15 | -2.63127 | 1 | 1 TRAJ47 | -      |
| ENSG00000211843 | 5.13E-15 | -2.63127 | 1 | 1 TRAJ46 | -      |
| ENSG00000211844 | 5.13E-15 | -2.63127 | 1 | 1 TRAJ45 | -      |
| ENSG00000211845 | 5.13E-15 | -2.63127 | 1 | 1 TRAJ44 | -      |
| ENSG00000211846 | 5.13E-15 | -2.63127 | 1 | 1 TRAJ43 | -      |
| ENSG00000211847 | 5.13E-15 | -2.63127 | 1 | 1 TRAJ42 | -      |
| ENSG00000211848 | 5.13E-15 | -2.63127 | 1 | 1 TRAJ41 | -      |
| ENSG00000211849 | 5.13E-15 | -2.63127 | 1 | 1 TRAJ40 | -      |
| ENSG00000211850 | 5.13E-15 | -2.63127 | 1 | 1 TRAJ39 | -      |
| ENSG00000211851 | 5.13E-15 | -2.63127 | 1 | 1 TRAJ38 | -      |
| ENSG00000211852 | 5.13E-15 | -2.63127 | 1 | 1 TRAJ37 | -      |
| ENSG00000211853 | 5.13E-15 | -2.63127 | 1 | 1 TRAJ36 | -      |
| ENSG00000211854 | 5.13E-15 | -2.63127 | 1 | 1 TRAJ35 | -      |
| ENSG00000211855 | 5.13E-15 | -2.63127 | 1 | 1 TRAJ34 | -      |
| ENSG00000211856 | 5.13E-15 | -2.63127 | 1 | 1 TRAJ33 | -      |
| ENSG00000211857 | 5.13E-15 | -2.63127 | 1 | 1 TRAJ32 | -      |
| ENSG00000211858 | 5.13E-15 | -2.63127 | 1 | 1 TRAJ31 | -      |
| ENSG00000211859 | 5.13E-15 | -2.63127 | 1 | 1 TRAJ30 | -      |
| ENSG00000211860 | 5.13E-15 | -2.63127 | 1 | 1 TRAJ29 | -      |
| ENSG00000211861 | 5.13E-15 | -2.63127 | 1 | 1 TRAJ28 | -      |
| ENSG00000211862 | 5.13E-15 | -2.63127 | 1 | 1 TRAJ27 | -      |
| ENSG00000211863 | 5.13E-15 | -2.63127 | 1 | 1 TRAJ26 | -      |
| ENSG00000211864 | 5.13E-15 | -2.63127 | 1 | 1 TRAJ25 | -      |
| ENSG00000211865 | 5.13E-15 | -2.63127 | 1 | 1 TRAJ24 | -      |
| ENSG00000211866 | 5.13E-15 | -2.63127 | 1 | 1 TRAJ23 | -      |
| ENSG00000211867 | 5.13E-15 | -2.63127 | 1 | 1 TRAJ22 | -      |
| ENSG00000211868 | 5.13E-15 | -2.63127 | 1 | 1 TRAJ21 | -      |
| ENSG00000211869 | 5.13E-15 | -2.63127 | 1 | 1 TRAJ20 | -      |
| ENSG00000211870 | 5.13E-15 | -2.63127 | 1 | 1 TRAJ19 | -      |
| ENSG00000211871 | 5.13E-15 | -2.63127 | 1 | 1 TRAJ18 | -      |
| ENSG00000211872 | 5.13E-15 | -2.63127 | 1 | 1 TRAJ17 | -      |
| ENSG00000211873 | 5.13E-15 | -2.63127 | 1 | 1 TRAJ16 | -      |
| ENSG00000211874 | 5.13E-15 | -2.63127 | 1 | 1 TRAJ15 | -      |
| ENSG00000211875 | 5.13E-15 | -2.63127 | 1 | 1 TRAJ14 | -      |
| ENSG00000211876 | 5.13E-15 | -2.63127 | 1 | 1 TRAJ13 | -      |
| ENSG00000211877 | 5.13E-15 | -2.63127 | 1 | 1 TRAJ12 | -      |
| ENSG00000211878 | 5.13E-15 | -2.63127 | 1 | 1 TRAJ11 | -      |
| ENSG00000211879 | 5.13E-15 | -2.63127 | 1 | 1 TRAJ10 | -      |
| ENSG00000211880 | 5.13E-15 | -2.63127 | 1 | 1 TRAJ9  | -      |
| ENSG00000211881 | 5.13E-15 | -2.63127 | 1 | 1 TRAJ8  | -      |
| ENSG00000211882 | 5.13E-15 | -2.63127 | 1 | 1 TRAJ7  | -      |
| ENSG00000211883 | 5.13E-15 | -2.63127 | 1 | 1 TRAJ6  | -      |
| ENSG00000211884 | 5.13E-15 | -2.63127 | 1 | 1 TRAJ5  | K10784 |
| ENSG00000211885 | 5.13E-15 | -2.63127 | 1 | 1 TRAJ4  | -      |
| ENSG00000211886 | 5.13E-15 | -2.63127 | 1 | 1 TRAJ3  | -      |
| ENSG00000211887 | 5.13E-15 | -2.63127 | 1 | 1 TRAJ2  | -      |
| ENSG00000211888 | 5.13E-15 | -2.63127 | 1 | 1 TRAJ1  | -      |
| ENSG00000211890 | 5.13E-15 | -2.63127 | 1 | 1 IGHA2  | K06856 |
| ENSG00000211891 | 5.13E-15 | -2.63127 | 1 | 1 IGHE   | -      |
| ENSG00000211893 | 5.13E-15 | -2.63127 | 1 | 1 IGHG2  | K06856 |

|                 |          |          |   |            |        |
|-----------------|----------|----------|---|------------|--------|
| ENSG00000211895 | 5.13E-15 | -2.63127 | 1 | 1 IGHA1    | K06856 |
| ENSG00000211896 | 5.13E-15 | -2.63127 | 1 | 1 IGHG1    | K06856 |
| ENSG00000211897 | 5.13E-15 | -2.63127 | 1 | 1 IGHG3    | K06856 |
| ENSG00000211898 | 5.13E-15 | -2.63127 | 1 | 1 IGHD     | -      |
| ENSG00000211899 | 5.13E-15 | -2.63127 | 1 | 1 IGHM     | -      |
| ENSG00000211900 | 5.13E-15 | -2.63127 | 1 | 1 IGHJ6    | -      |
| ENSG00000211904 | 5.13E-15 | -2.63127 | 1 | 1 IGHJ2    | -      |
| ENSG00000211905 | 5.13E-15 | -2.63127 | 1 | 1 IGHJ1    | K06856 |
| ENSG00000211907 | 5.13E-15 | -2.63127 | 1 | 1 IGHD1-26 | -      |
| ENSG00000211909 | 5.13E-15 | -2.63127 | 1 | 1 IGHD5-24 | -      |
| ENSG00000211911 | 5.13E-15 | -2.63127 | 1 | 1 IGHD3-22 | -      |
| ENSG00000211912 | 5.13E-15 | -2.63127 | 1 | 1 IGHD2-21 | -      |
| ENSG00000211914 | 5.13E-15 | -2.63127 | 1 | 1 IGHD6-19 | -      |
| ENSG00000211915 | 5.13E-15 | -2.63127 | 1 | 1 IGHD5-18 | -      |
| ENSG00000211917 | 5.13E-15 | -2.63127 | 1 | 1 IGHD3-16 | -      |
| ENSG00000211918 | 5.13E-15 | -2.63127 | 1 | 1 IGHD2-15 | -      |
| ENSG00000211920 | 5.13E-15 | -2.63127 | 1 | 1 IGHD6-13 | -      |
| ENSG00000211921 | 5.13E-15 | -2.63127 | 1 | 1 IGHD5-12 | -      |
| ENSG00000211923 | 5.13E-15 | -2.63127 | 1 | 1 IGHD3-10 | -      |
| ENSG00000211924 | 5.13E-15 | -2.63127 | 1 | 1 IGHD3-9  | -      |
| ENSG00000211925 | 5.13E-15 | -2.63127 | 1 | 1 IGHD2-8  | -      |
| ENSG00000211928 | 5.13E-15 | -2.63127 | 1 | 1 IGHD5-5  | -      |
| ENSG00000211930 | 5.13E-15 | -2.63127 | 1 | 1 IGHD3-3  | -      |
| ENSG00000211931 | 5.13E-15 | -2.63127 | 1 | 1 IGHD2-2  | -      |
| ENSG00000211933 | 5.13E-15 | -2.63127 | 1 | 1 IGHV6-1  | K06856 |
| ENSG00000211934 | 5.13E-15 | -2.63127 | 1 | 1 IGHV1-2  | K06856 |
| ENSG00000211935 | 5.13E-15 | -2.63127 | 1 | 1 IGHV1-3  | K06856 |
| ENSG00000211936 | 5.13E-15 | -2.63127 | 1 | 1 IGHV4-4  | K06856 |
| ENSG00000211938 | 5.13E-15 | -2.63127 | 1 | 1 IGHV3-7  | K06856 |
| ENSG00000211939 | 5.13E-15 | -2.63127 | 1 | 1 IGHV1-8  | K06856 |
| ENSG00000211940 | 5.13E-15 | -2.63127 | 1 | 1 IGHV3-9  | K06856 |
| ENSG00000211941 | 5.13E-15 | -2.63127 | 1 | 1 IGHV3-11 | K06856 |
| ENSG00000211942 | 5.13E-15 | -2.63127 | 1 | 1 IGHV3-13 | K06856 |
| ENSG00000211943 | 5.13E-15 | -2.63127 | 1 | 1 IGHV3-15 | K06856 |
| ENSG00000211944 | 5.13E-15 | -2.63127 | 1 | 1 IGHV3-16 | K06856 |
| ENSG00000211945 | 5.13E-15 | -2.63127 | 1 | 1 IGHV1-18 | K06856 |
| ENSG00000211946 | 5.13E-15 | -2.63127 | 1 | 1 IGHV3-20 | K06856 |
| ENSG00000211947 | 5.13E-15 | -2.63127 | 1 | 1 IGHV3-21 | K06856 |
| ENSG00000211949 | 5.13E-15 | -2.63127 | 1 | 1 IGHV3-23 | K06856 |
| ENSG00000211950 | 5.13E-15 | -2.63127 | 1 | 1 IGHV1-24 | K06856 |
| ENSG00000211951 | 5.13E-15 | -2.63127 | 1 | 1 IGHV2-26 | -      |
| ENSG00000211952 | 5.13E-15 | -2.63127 | 1 | 1 IGHV4-28 | K06856 |
| ENSG00000211953 | 5.13E-15 | -2.63127 | 1 | 1 IGHV3-30 | K06856 |
| ENSG00000211955 | 5.13E-15 | -2.63127 | 1 | 1 IGHV3-33 | K06856 |
| ENSG00000211956 | 5.13E-15 | -2.63127 | 1 | 1 IGHV4-34 | K06856 |
| ENSG00000211957 | 5.13E-15 | -2.63127 | 1 | 1 IGHV3-35 | K06856 |
| ENSG00000211958 | 5.13E-15 | -2.63127 | 1 | 1 IGHV3-38 | K06856 |
| ENSG00000211962 | 5.13E-15 | -2.63127 | 1 | 1 IGHV1-46 | K06856 |
| ENSG00000211964 | 5.13E-15 | -2.63127 | 1 | 1 IGHV3-48 | K06856 |
| ENSG00000211965 | 5.13E-15 | -2.63127 | 1 | 1 IGHV3-49 | K06856 |
| ENSG00000211966 | 5.13E-15 | -2.63127 | 1 | 1 IGHV5-51 | -      |
| ENSG00000211967 | 5.13E-15 | -2.63127 | 1 | 1 IGHV3-53 | K06856 |
| ENSG00000211968 | 5.13E-15 | -2.63127 | 1 | 1 IGHV1-58 | K06856 |
| ENSG00000211970 | 5.13E-15 | -2.63127 | 1 | 1 IGHV4-61 | K06856 |
| ENSG00000211972 | 5.13E-15 | -2.63127 | 1 | 1 IGHV3-66 | K06856 |
| ENSG00000211973 | 5.13E-15 | -2.63127 | 1 | 1 IGHV1-69 | K06856 |
| ENSG00000211974 | 5.13E-15 | -2.63127 | 1 | 1 IGHV2-70 | -      |
| ENSG00000211976 | 5.13E-15 | -2.63127 | 1 | 1 IGHV3-73 | K06856 |

|                 |          |          |   |              |        |
|-----------------|----------|----------|---|--------------|--------|
| ENSG00000211978 | 5.13E-15 | -2.63127 | 1 | 1 IGHV5-78   | -      |
| ENSG00000211979 | 5.13E-15 | -2.63127 | 1 | 1 IGHV7-81   | K06856 |
| ENSG00000211983 | 5.13E-15 | -2.63127 | 1 | 1 AL138919.1 | -      |
| ENSG00000211984 | 5.13E-15 | -2.63127 | 1 | 1 AC079117.2 | -      |
| ENSG00000211987 | 5.13E-15 | -2.63127 | 1 | 1 AC104802.1 | -      |
| ENSG00000211990 | 5.13E-15 | -2.63127 | 1 | 1 AL117209.1 | -      |
| ENSG00000211991 | 5.13E-15 | -2.63127 | 1 | 1 MIR676     | -      |
| ENSG00000211995 | 5.13E-15 | -2.63127 | 1 | 1 AP000428.1 | -      |
| ENSG00000211996 | 5.13E-15 | -2.63127 | 1 | 1 Z97352.1   | -      |
| ENSG00000212001 | 5.13E-15 | -2.63127 | 1 | 1 AC009297.1 | -      |
| ENSG00000212007 | 5.13E-15 | -2.63127 | 1 | 1 AL596329.1 | -      |
| ENSG00000212013 | 5.13E-15 | -2.63127 | 1 | 1 MIR509-2   | -      |
| ENSG00000212014 | 5.13E-15 | -2.63127 | 1 | 1 MIR509-3   | -      |
| ENSG00000212017 | 5.13E-15 | -2.63127 | 1 | 1 MIR548U    | -      |
| ENSG00000212022 | 5.13E-15 | -2.63127 | 1 | 1 AC080032.1 | -      |
| ENSG00000212024 | 5.13E-15 | -2.63127 | 1 | 1 MIR550A3   | -      |
| ENSG00000212025 | 5.13E-15 | -2.63127 | 1 | 1 AC011748.1 | -      |
| ENSG00000212027 | 5.13E-15 | -2.63127 | 1 | 1 MIR374B    | -      |
| ENSG00000212030 | 5.13E-15 | -2.63127 | 1 | 1 AP002498.1 | -      |
| ENSG00000212031 | 5.13E-15 | -2.63127 | 1 | 1 AC117444.1 | -      |
| ENSG00000212032 | 5.13E-15 | -2.63127 | 1 | 1 AC007486.1 | -      |
| ENSG00000212034 | 5.13E-15 | -2.63127 | 1 | 1 AC084262.1 | -      |
| ENSG00000212036 | 5.13E-15 | -2.63127 | 1 | 1 AC016575.1 | -      |
| ENSG00000212037 | 5.13E-15 | -2.63127 | 1 | 1 AL049831.1 | -      |
| ENSG00000212039 | 5.13E-15 | -2.63127 | 1 | 1 AL592205.1 | -      |
| ENSG00000212040 | 5.13E-15 | -2.63127 | 1 | 1 MIR543     | -      |
| ENSG00000212044 | 5.13E-15 | -2.63127 | 1 | 1 CR812485.1 | -      |
| ENSG00000212045 | 5.13E-15 | -2.63127 | 1 | 1 AC109351.1 | -      |
| ENSG00000212049 | 5.13E-15 | -2.63127 | 1 | 1 AL590007.1 | -      |
| ENSG00000212051 | 5.13E-15 | -2.63127 | 1 | 1 MIR320C2   | -      |
| ENSG00000212054 | 5.13E-15 | -2.63127 | 1 | 1 AL354764.1 | -      |
| ENSG00000212055 | 5.13E-15 | -2.63127 | 1 | 1 AC122136.1 | -      |
| ENSG00000212057 | 5.13E-15 | -2.63127 | 1 | 1 AL139318.1 | -      |
| ENSG00000212061 | 5.13E-15 | -2.63127 | 1 | 1 AC016543.1 | -      |
| ENSG00000212063 | 5.13E-15 | -2.63127 | 1 | 1 AC112693.1 | -      |
| ENSG00000212065 | 5.13E-15 | -2.63127 | 1 | 1 AL591034.1 | -      |
| ENSG00000212066 | 5.13E-15 | -2.63127 | 1 | 1 AL645941.1 | -      |
| ENSG00000212067 | 5.13E-15 | -2.63127 | 1 | 1 AP005227.1 | -      |
| ENSG00000212070 | 5.13E-15 | -2.63127 | 1 | 1 AC112219.1 | -      |
| ENSG00000212071 | 5.13E-15 | -2.63127 | 1 | 1 AL162511.1 | -      |
| ENSG00000212072 | 5.13E-15 | -2.63127 | 1 | 1 AL353147.1 | -      |
| ENSG00000212073 | 5.13E-15 | -2.63127 | 1 | 1 AC121332.1 | -      |
| ENSG00000212075 | 5.13E-15 | -2.63127 | 1 | 1 AC112778.1 | -      |
| ENSG00000212076 | 5.13E-15 | -2.63127 | 1 | 1 MIR761     | -      |
| ENSG00000212082 | 5.13E-15 | -2.63127 | 1 | 1 AC010368.1 | -      |
| ENSG00000212084 | 5.13E-15 | -2.63127 | 1 | 1 AL121914.1 | -      |
| ENSG00000212085 | 5.13E-15 | -2.63127 | 1 | 1 AC105245.1 | -      |
| ENSG00000212086 | 5.13E-15 | -2.63127 | 1 | 1 AL390119.1 | -      |
| ENSG00000212089 | 5.13E-15 | -2.63127 | 1 | 1 AP002490.1 | -      |
| ENSG00000212091 | 5.13E-15 | -2.63127 | 1 | 1 AC013268.1 | -      |
| ENSG00000212093 | 5.13E-15 | -2.63127 | 1 | 1 AP000807.1 | -      |
| ENSG00000212094 | 5.13E-15 | -2.63127 | 1 | 1 AC092765.1 | -      |
| ENSG00000212095 | 5.13E-15 | -2.63127 | 1 | 1 AC096922.1 | -      |
| ENSG00000212098 | 5.13E-15 | -2.63127 | 1 | 1 AL390966.1 | -      |
| ENSG00000212099 | 5.13E-15 | -2.63127 | 1 | 1 AL035467.1 | -      |
| ENSG00000212100 | 5.13E-15 | -2.63127 | 1 | 1 MIR764     | -      |
| ENSG00000212101 | 5.13E-15 | -2.63127 | 1 | 1 AL080276.1 | -      |
| ENSG00000212102 | 5.13E-15 | -2.63127 | 1 | 1 MIR301B    | -      |



|                 |          |          |   |              |        |
|-----------------|----------|----------|---|--------------|--------|
| ENSG00000212104 | 5.13E-15 | -2.63127 | 1 | 1 AC026877.1 | --     |
| ENSG00000212111 | 5.13E-15 | -2.63127 | 1 | 1 AL121584.1 | --     |
| ENSG00000212114 | 5.13E-15 | -2.63127 | 1 | 1 AC093267.1 | --     |
| ENSG00000212122 | 5.13E-15 | -2.63127 | 1 | 1 TSSK1B     | K08811 |
| ENSG00000212124 | 5.13E-15 | -2.63127 | 1 | 1 TAS2R19    | K08474 |
| ENSG00000212125 | 5.13E-15 | -2.63127 | 1 | 1 TAS2R15    | K08474 |
| ENSG00000212126 | 5.13E-15 | -2.63127 | 1 | 1 TAS2R50    | K08474 |
| ENSG00000212127 | 5.13E-15 | -2.63127 | 1 | 1 TAS2R14    | K08474 |
| ENSG00000212128 | 5.13E-15 | -2.63127 | 1 | 1 TAS2R13    | K08474 |
| ENSG00000212133 | 5.13E-15 | -2.63127 | 1 | 1 RNU6-1168P | --     |
| ENSG00000212134 | 5.13E-15 | -2.63127 | 1 | 1 SNORA40    | --     |
| ENSG00000212135 | 5.13E-15 | -2.63127 | 1 | 1 SNORD67    | --     |
| ENSG00000212136 | 5.13E-15 | -2.63127 | 1 | 1 RNU6-696P  | --     |
| ENSG00000212138 | 5.13E-15 | -2.63127 | 1 | 1 RNA5SP372  | --     |
| ENSG00000212140 | 5.13E-15 | -2.63127 | 1 | 1 RNU6-1320P | --     |
| ENSG00000212144 | 5.13E-15 | -2.63127 | 1 | 1 U8         | --     |
| ENSG00000212145 | 5.13E-15 | -2.63127 | 1 | 1 U8         | --     |
| ENSG00000212146 | 5.13E-15 | -2.63127 | 1 | 1 RNU6-910P  | --     |
| ENSG00000212147 | 5.13E-15 | -2.63127 | 1 | 1 RNU6-1106P | --     |
| ENSG00000212149 | 5.13E-15 | -2.63127 | 1 | 1 SNORA40    | --     |
| ENSG00000212153 | 5.13E-15 | -2.63127 | 1 | 1 RNU1-82P   | --     |
| ENSG00000212154 | 5.13E-15 | -2.63127 | 1 | 1 RNA5SP377  | --     |
| ENSG00000212156 | 5.13E-15 | -2.63127 | 1 | 1 RNU6-576P  | --     |
| ENSG00000212157 | 5.13E-15 | -2.63127 | 1 | 1 RNU6-1319P | --     |
| ENSG00000212158 | 5.13E-15 | -2.63127 | 1 | 1 SNORD66    | --     |
| ENSG00000212160 | 5.13E-15 | -2.63127 | 1 | 1 RNU6-205P  | --     |
| ENSG00000212161 | 5.13E-15 | -2.63127 | 1 | 1 SNORD64    | --     |
| ENSG00000212163 | 5.13E-15 | -2.63127 | 1 | 1 SNORD91A   | --     |
| ENSG00000212165 | 5.13E-15 | -2.63127 | 1 | 1 U3         | --     |
| ENSG00000212167 | 5.13E-15 | -2.63127 | 1 | 1 RNU6-763P  | --     |
| ENSG00000212168 | 5.13E-15 | -2.63127 | 1 | 1 SNORD78    | --     |
| ENSG00000212170 | 5.13E-15 | -2.63127 | 1 | 1 RNU1-77P   | --     |
| ENSG00000212171 | 5.13E-15 | -2.63127 | 1 | 1 RNA5SP86   | --     |
| ENSG00000212172 | 5.13E-15 | -2.63127 | 1 | 1 RNU1-149P  | --     |
| ENSG00000212174 | 5.13E-15 | -2.63127 | 1 | 1 Y_RNA      | --     |
| ENSG00000212176 | 5.13E-15 | -2.63127 | 1 | 1 RNA5SP207  | --     |
| ENSG00000212181 | 5.13E-15 | -2.63127 | 1 | 1 SNORA48    | --     |
| ENSG00000212182 | 5.13E-15 | -2.63127 | 1 | 1 U3         | --     |
| ENSG00000212184 | 5.13E-15 | -2.63127 | 1 | 1 RNU6-440P  | --     |
| ENSG00000212186 | 5.13E-15 | -2.63127 | 1 | 1 RNU6-258P  | --     |
| ENSG00000212187 | 5.13E-15 | -2.63127 | 1 | 1 SNORA26    | --     |
| ENSG00000212189 | 5.13E-15 | -2.63127 | 1 | 1 RNU6-328P  | --     |
| ENSG00000212190 | 5.13E-15 | -2.63127 | 1 | 1 RNU6-298P  | --     |
| ENSG00000212191 | 5.13E-15 | -2.63127 | 1 | 1 SNORD65    | --     |
| ENSG00000212195 | 5.13E-15 | -2.63127 | 1 | 1 U3         | --     |
| ENSG00000212197 | 5.13E-15 | -2.63127 | 1 | 1 RNY3P6     | --     |
| ENSG00000212199 | 5.13E-15 | -2.63127 | 1 | 1 RNU6-127P  | --     |
| ENSG00000212204 | 5.13E-15 | -2.63127 | 1 | 1 RNA5SP91   | --     |
| ENSG00000212205 | 5.13E-15 | -2.63127 | 1 | 1 Y_RNA      | --     |
| ENSG00000212206 | 5.13E-15 | -2.63127 | 1 | 1 SNORA69    | --     |
| ENSG00000212207 | 5.13E-15 | -2.63127 | 1 | 1 RNU6-1321P | --     |
| ENSG00000212211 | 5.13E-15 | -2.63127 | 1 | 1 U3         | --     |
| ENSG00000212214 | 5.13E-15 | -2.63127 | 1 | 1 SNORA48    | --     |
| ENSG00000212215 | 5.13E-15 | -2.63127 | 1 | 1 RNU6-913P  | --     |
| ENSG00000212216 | 5.13E-15 | -2.63127 | 1 | 1 RNU6-816P  | --     |
| ENSG00000212219 | 5.13E-15 | -2.63127 | 1 | 1 RNU6-604P  | --     |
| ENSG00000212221 | 5.13E-15 | -2.63127 | 1 | 1 RNU6-220P  | --     |
| ENSG00000212224 | 5.13E-15 | -2.63127 | 1 | 1 SNORA26    | --     |

|                 |          |          |   |              |    |
|-----------------|----------|----------|---|--------------|----|
| ENSG00000212226 | 5.13E-15 | -2.63127 | 1 | 1 RNU6-907P  | -- |
| ENSG00000212228 | 5.13E-15 | -2.63127 | 1 | 1 SNORA48    | -- |
| ENSG00000212229 | 5.13E-15 | -2.63127 | 1 | 1 SNORD65    | -- |
| ENSG00000212230 | 5.13E-15 | -2.63127 | 1 | 1 RNU6-747P  | -- |
| ENSG00000212238 | 5.13E-15 | -2.63127 | 1 | 1 RNA5SP244  | -- |
| ENSG00000212240 | 5.13E-15 | -2.63127 | 1 | 1 RNU6-930P  | -- |
| ENSG00000212241 | 5.13E-15 | -2.63127 | 1 | 1 Y_RNA      | -- |
| ENSG00000212246 | 5.13E-15 | -2.63127 | 1 | 1 RNU6-360P  | -- |
| ENSG00000212247 | 5.13E-15 | -2.63127 | 1 | 1 RNU6-278P  | -- |
| ENSG00000212248 | 5.13E-15 | -2.63127 | 1 | 1 RNU6-750P  | -- |
| ENSG00000212249 | 5.13E-15 | -2.63127 | 1 | 1 U8         | -- |
| ENSG00000212251 | 5.13E-15 | -2.63127 | 1 | 1 RNA5SP376  | -- |
| ENSG00000212254 | 5.13E-15 | -2.63127 | 1 | 1 RNU6-124P  | -- |
| ENSG00000212257 | 5.13E-15 | -2.63127 | 1 | 1 RNU6-1176P | -- |
| ENSG00000212258 | 5.13E-15 | -2.63127 | 1 | 1 RNA5SP176  | -- |
| ENSG00000212259 | 5.13E-15 | -2.63127 | 1 | 1 RNU6-308P  | -- |
| ENSG00000212260 | 5.13E-15 | -2.63127 | 1 | 1 RNU6-724P  | -- |
| ENSG00000212264 | 5.13E-15 | -2.63127 | 1 | 1 SNORD65    | -- |
| ENSG00000212265 | 5.13E-15 | -2.63127 | 1 | 1 RNA5SP185  | -- |
| ENSG00000212266 | 5.13E-15 | -2.63127 | 1 | 1 SNORA40    | -- |
| ENSG00000212269 | 5.13E-15 | -2.63127 | 1 | 1 RNU6-788P  | -- |
| ENSG00000212270 | 5.13E-15 | -2.63127 | 1 | 1 SNORD37    | -- |
| ENSG00000212273 | 5.13E-15 | -2.63127 | 1 | 1 SNORA40    | -- |
| ENSG00000212276 | 5.13E-15 | -2.63127 | 1 | 1 RNA5SP292  | -- |
| ENSG00000212277 | 5.13E-15 | -2.63127 | 1 | 1 SNORD43    | -- |
| ENSG00000212278 | 5.13E-15 | -2.63127 | 1 | 1 SNORD81    | -- |
| ENSG00000212279 | 5.13E-15 | -2.63127 | 1 | 1 SNORD77    | -- |
| ENSG00000212280 | 5.13E-15 | -2.63127 | 1 | 1 RNA5SP256  | -- |
| ENSG00000212282 | 5.13E-15 | -2.63127 | 1 | 1 RNU6-578P  | -- |
| ENSG00000212283 | 5.13E-15 | -2.63127 | 1 | 1 SNORD89    | -- |
| ENSG00000212289 | 5.13E-15 | -2.63127 | 1 | 1 RNA5SP339  | -- |
| ENSG00000212290 | 5.13E-15 | -2.63127 | 1 | 1 RNA5SP424  | -- |
| ENSG00000212292 | 5.13E-15 | -2.63127 | 1 | 1 RNU6-239P  | -- |
| ENSG00000212293 | 5.13E-15 | -2.63127 | 1 | 1 SNORA16    | -- |
| ENSG00000212295 | 5.13E-15 | -2.63127 | 1 | 1 SNORD28    | -- |
| ENSG00000212297 | 5.13E-15 | -2.63127 | 1 | 1 RNU6-821P  | -- |
| ENSG00000212298 | 5.13E-15 | -2.63127 | 1 | 1 RNU6-1009P | -- |
| ENSG00000212302 | 5.13E-15 | -2.63127 | 1 | 1 SNORD41    | -- |
| ENSG00000212303 | 5.13E-15 | -2.63127 | 1 | 1 RNU6-1154P | -- |
| ENSG00000212305 | 5.13E-15 | -2.63127 | 1 | 1 RNU6-679P  | -- |
| ENSG00000212306 | 5.13E-15 | -2.63127 | 1 | 1 Y_RNA      | -- |
| ENSG00000212308 | 5.13E-15 | -2.63127 | 1 | 1 RNA5SP23   | -- |
| ENSG00000212309 | 5.13E-15 | -2.63127 | 1 | 1 SNORD70    | -- |
| ENSG00000212312 | 5.13E-15 | -2.63127 | 1 | 1 RNA5SP109  | -- |
| ENSG00000212314 | 5.13E-15 | -2.63127 | 1 | 1 RNU6-1307P | -- |
| ENSG00000212316 | 5.13E-15 | -2.63127 | 1 | 1 RNU6-1228P | -- |
| ENSG00000212319 | 5.13E-15 | -2.63127 | 1 | 1 Y_RNA      | -- |
| ENSG00000212321 | 5.13E-15 | -2.63127 | 1 | 1 U3         | -- |
| ENSG00000212324 | 5.13E-15 | -2.63127 | 1 | 1 RNU6-129P  | -- |
| ENSG00000212325 | 5.13E-15 | -2.63127 | 1 | 1 Y_RNA      | -- |
| ENSG00000212329 | 5.13E-15 | -2.63127 | 1 | 1 RNU6-316P  | -- |
| ENSG00000212330 | 5.13E-15 | -2.63127 | 1 | 1 RNU6-244P  | -- |
| ENSG00000212331 | 5.13E-15 | -2.63127 | 1 | 1 RNA5SP297  | -- |
| ENSG00000212332 | 5.13E-15 | -2.63127 | 1 | 1 RNU6-780P  | -- |
| ENSG00000212333 | 5.13E-15 | -2.63127 | 1 | 1 RNA5SP213  | -- |
| ENSG00000212335 | 5.13E-15 | -2.63127 | 1 | 1 Y_RNA      | -- |
| ENSG00000212336 | 5.13E-15 | -2.63127 | 1 | 1 RNA5SP210  | -- |
| ENSG00000212338 | 5.13E-15 | -2.63127 | 1 | 1 SNORA67    | -- |

|                 |          |          |   |               |    |
|-----------------|----------|----------|---|---------------|----|
| ENSG00000212340 | 5.13E-15 | -2.63127 | 1 | 1 RNU6-739P   | -- |
| ENSG00000212344 | 5.13E-15 | -2.63127 | 1 | 1 RNU6-823P   | -- |
| ENSG00000212345 | 5.13E-15 | -2.63127 | 1 | 1 RNU6-700P   | -- |
| ENSG00000212347 | 5.13E-15 | -2.63127 | 1 | 1 SNORD77     | -- |
| ENSG00000212348 | 5.13E-15 | -2.63127 | 1 | 1 RNU6-1300P  | -- |
| ENSG00000212354 | 5.13E-15 | -2.63127 | 1 | 1 RNU6-1242P  | -- |
| ENSG00000212358 | 5.13E-15 | -2.63127 | 1 | 1 RNU6-837P   | -- |
| ENSG00000212359 | 5.13E-15 | -2.63127 | 1 | 1 RNU6-550P   | -- |
| ENSG00000212360 | 5.13E-15 | -2.63127 | 1 | 1 RNU6-1177P  | -- |
| ENSG00000212363 | 5.13E-15 | -2.63127 | 1 | 1 SNORA40     | -- |
| ENSG00000212365 | 5.13E-15 | -2.63127 | 1 | 1 RNA5SP332   | -- |
| ENSG00000212366 | 5.13E-15 | -2.63127 | 1 | 1 RNU6-1246P  | -- |
| ENSG00000212368 | 5.13E-15 | -2.63127 | 1 | 1 RNU6-1000P  | -- |
| ENSG00000212370 | 5.13E-15 | -2.63127 | 1 | 1 RNU6-482P   | -- |
| ENSG00000212373 | 5.13E-15 | -2.63127 | 1 | 1 RNA5SP171   | -- |
| ENSG00000212374 | 5.13E-15 | -2.63127 | 1 | 1 RNU6-401P   | -- |
| ENSG00000212377 | 5.13E-15 | -2.63127 | 1 | 1 SNORD37     | -- |
| ENSG00000212379 | 5.13E-15 | -2.63127 | 1 | 1 RNU6-269P   | -- |
| ENSG00000212380 | 5.13E-15 | -2.63127 | 1 | 1 SNORD115-45 | -- |
| ENSG00000212382 | 5.13E-15 | -2.63127 | 1 | 1 RNU6-159P   | -- |
| ENSG00000212383 | 5.13E-15 | -2.63127 | 1 | 1 SNORA48     | -- |
| ENSG00000212384 | 5.13E-15 | -2.63127 | 1 | 1 SNORD113-2  | -- |
| ENSG00000212385 | 5.13E-15 | -2.63127 | 1 | 1 RNU6-817P   | -- |
| ENSG00000212387 | 5.13E-15 | -2.63127 | 1 | 1 RNU6-1055P  | -- |
| ENSG00000212388 | 5.13E-15 | -2.63127 | 1 | 1 RNU6-796P   | -- |
| ENSG00000212389 | 5.13E-15 | -2.63127 | 1 | 1 RNU6-1275P  | -- |
| ENSG00000212391 | 5.13E-15 | -2.63127 | 1 | 1 SNORA48     | -- |
| ENSG00000212392 | 5.13E-15 | -2.63127 | 1 | 1 Y_RNA       | -- |
| ENSG00000212395 | 5.13E-15 | -2.63127 | 1 | 1 SNORA67     | -- |
| ENSG00000212397 | 5.13E-15 | -2.63127 | 1 | 1 snosnR66    | -- |
| ENSG00000212398 | 5.13E-15 | -2.63127 | 1 | 1 RNU6-1248P  | -- |
| ENSG00000212404 | 5.13E-15 | -2.63127 | 1 | 1 Y_RNA       | -- |
| ENSG00000212407 | 5.13E-15 | -2.63127 | 1 | 1 RNU6-663P   | -- |
| ENSG00000212409 | 5.13E-15 | -2.63127 | 1 | 1 RNY4P18     | -- |
| ENSG00000212410 | 5.13E-15 | -2.63127 | 1 | 1 RNU6-932P   | -- |
| ENSG00000212411 | 5.13E-15 | -2.63127 | 1 | 1 SNORD115    | -- |
| ENSG00000212413 | 5.13E-15 | -2.63127 | 1 | 1 RNU11-3P    | -- |
| ENSG00000212414 | 5.13E-15 | -2.63127 | 1 | 1 SNORD77     | -- |
| ENSG00000212415 | 5.13E-15 | -2.63127 | 1 | 1 SNORD77     | -- |
| ENSG00000212418 | 5.13E-15 | -2.63127 | 1 | 1 Y_RNA       | -- |
| ENSG00000212420 | 5.13E-15 | -2.63127 | 1 | 1 RNU6-1111P  | -- |
| ENSG00000212421 | 5.13E-15 | -2.63127 | 1 | 1 SNORA26     | -- |
| ENSG00000212422 | 5.13E-15 | -2.63127 | 1 | 1 U3          | -- |
| ENSG00000212424 | 5.13E-15 | -2.63127 | 1 | 1 RNU1-119P   | -- |
| ENSG00000212425 | 5.13E-15 | -2.63127 | 1 | 1 RNA5SP105   | -- |
| ENSG00000212428 | 5.13E-15 | -2.63127 | 1 | 1 SNORD115    | -- |
| ENSG00000212429 | 5.13E-15 | -2.63127 | 1 | 1 RNU11-6P    | -- |
| ENSG00000212433 | 5.13E-15 | -2.63127 | 1 | 1 RNA5SP252   | -- |
| ENSG00000212434 | 5.13E-15 | -2.63127 | 1 | 1 U3          | -- |
| ENSG00000212441 | 5.13E-15 | -2.63127 | 1 | 1 RNU6-1269P  | -- |
| ENSG00000212442 | 5.13E-15 | -2.63127 | 1 | 1 RNU6-243P   | -- |
| ENSG00000212445 | 5.13E-15 | -2.63127 | 1 | 1 SNORA48     | -- |
| ENSG00000212446 | 5.13E-15 | -2.63127 | 1 | 1 RNU6-131P   | -- |
| ENSG00000212447 | 5.13E-15 | -2.63127 | 1 | 1 SNORD90     | -- |
| ENSG00000212448 | 5.13E-15 | -2.63127 | 1 | 1 Y_RNA       | -- |
| ENSG00000212450 | 5.13E-15 | -2.63127 | 1 | 1 RNU6-241P   | -- |
| ENSG00000212451 | 5.13E-15 | -2.63127 | 1 | 1 RNU11-4P    | -- |
| ENSG00000212454 | 5.13E-15 | -2.63127 | 1 | 1 RNA5SP286   | -- |

|                 |          |          |   |               |   |
|-----------------|----------|----------|---|---------------|---|
| ENSG00000212455 | 5.13E-15 | -2.63127 | 1 | 1 SNORA40     | - |
| ENSG00000212456 | 5.13E-15 | -2.63127 | 1 | 1 RNVU1-13    | - |
| ENSG00000212457 | 5.13E-15 | -2.63127 | 1 | 1 RNU6-644P   | - |
| ENSG00000212458 | 5.13E-15 | -2.63127 | 1 | 1 SNORA48     | - |
| ENSG00000212459 | 5.13E-15 | -2.63127 | 1 | 1 RNU6-695P   | - |
| ENSG00000212460 | 5.13E-15 | -2.63127 | 1 | 1 RNU6-460P   | - |
| ENSG00000212461 | 5.13E-15 | -2.63127 | 1 | 1 SNORA17     | - |
| ENSG00000212468 | 5.13E-15 | -2.63127 | 1 | 1 RNU6-754P   | - |
| ENSG00000212469 | 5.13E-15 | -2.63127 | 1 | 1 RNU6-1158P  | - |
| ENSG00000212473 | 5.13E-15 | -2.63127 | 1 | 1 RNU1-101P   | - |
| ENSG00000212475 | 5.13E-15 | -2.63127 | 1 | 1 RNU6-400P   | - |
| ENSG00000212479 | 5.13E-15 | -2.63127 | 1 | 1 U3          | - |
| ENSG00000212482 | 5.13E-15 | -2.63127 | 1 | 1 RNU6-530P   | - |
| ENSG00000212485 | 5.13E-15 | -2.63127 | 1 | 1 RNU6-1197P  | - |
| ENSG00000212489 | 5.13E-15 | -2.63127 | 1 | 1 RNU6-1109P  | - |
| ENSG00000212490 | 5.13E-15 | -2.63127 | 1 | 1 SNORA26     | - |
| ENSG00000212495 | 5.13E-15 | -2.63127 | 1 | 1 RNU6-332P   | - |
| ENSG00000212496 | 5.13E-15 | -2.63127 | 1 | 1 RNU6-1093P  | - |
| ENSG00000212497 | 5.13E-15 | -2.63127 | 1 | 1 RNA5SP465   | - |
| ENSG00000212498 | 5.13E-15 | -2.63127 | 1 | 1 SNORD86     | - |
| ENSG00000212499 | 5.13E-15 | -2.63127 | 1 | 1 RNA5SP300   | - |
| ENSG00000212505 | 5.13E-15 | -2.63127 | 1 | 1 RNA5SP299   | - |
| ENSG00000212510 | 5.13E-15 | -2.63127 | 1 | 1 RNU6-972P   | - |
| ENSG00000212511 | 5.13E-15 | -2.63127 | 1 | 1 U3          | - |
| ENSG00000212512 | 5.13E-15 | -2.63127 | 1 | 1 Y_RNA       | - |
| ENSG00000212516 | 5.13E-15 | -2.63127 | 1 | 1 RNU6-1268P  | - |
| ENSG00000212517 | 5.13E-15 | -2.63127 | 1 | 1 SNORA26     | - |
| ENSG00000212518 | 5.13E-15 | -2.63127 | 1 | 1 RNU11-5P    | - |
| ENSG00000212520 | 5.13E-15 | -2.63127 | 1 | 1 RNU6-1250P  | - |
| ENSG00000212521 | 5.13E-15 | -2.63127 | 1 | 1 RNU6-918P   | - |
| ENSG00000212522 | 5.13E-15 | -2.63127 | 1 | 1 Y_RNA       | - |
| ENSG00000212525 | 5.13E-15 | -2.63127 | 1 | 1 RNA5SP212   | - |
| ENSG00000212527 | 5.13E-15 | -2.63127 | 1 | 1 RNA5SP63    | - |
| ENSG00000212528 | 5.13E-15 | -2.63127 | 1 | 1 SNORD115-47 | - |
| ENSG00000212529 | 5.13E-15 | -2.63127 | 1 | 1 SNORA57     | - |
| ENSG00000212532 | 5.13E-15 | -2.63127 | 1 | 1 SNORD66     | - |
| ENSG00000212534 | 5.13E-15 | -2.63127 | 1 | 1 SNORD70     | - |
| ENSG00000212535 | 5.13E-15 | -2.63127 | 1 | 1 RNU6-808P   | - |
| ENSG00000212538 | 5.13E-15 | -2.63127 | 1 | 1 U3          | - |
| ENSG00000212539 | 5.13E-15 | -2.63127 | 1 | 1 U3          | - |
| ENSG00000212544 | 5.13E-15 | -2.63127 | 1 | 1 RNVU1-19    | - |
| ENSG00000212545 | 5.13E-15 | -2.63127 | 1 | 1 RNU6-337P   | - |
| ENSG00000212546 | 5.13E-15 | -2.63127 | 1 | 1 RNU6-995P   | - |
| ENSG00000212549 | 5.13E-15 | -2.63127 | 1 | 1 RNA5SP354   | - |
| ENSG00000212550 | 5.13E-15 | -2.63127 | 1 | 1 RNU1-78P    | - |
| ENSG00000212551 | 5.13E-15 | -2.63127 | 1 | 1 U3          | - |
| ENSG00000212552 | 5.13E-15 | -2.63127 | 1 | 1 SNORD91B    | - |
| ENSG00000212553 | 5.13E-15 | -2.63127 | 1 | 1 SNORD116    | - |
| ENSG00000212555 | 5.13E-15 | -2.63127 | 1 | 1 RNU6-192P   | - |
| ENSG00000212556 | 5.13E-15 | -2.63127 | 1 | 1 Y_RNA       | - |
| ENSG00000212558 | 5.13E-15 | -2.63127 | 1 | 1 SNORA26     | - |
| ENSG00000212559 | 5.13E-15 | -2.63127 | 1 | 1 RNA5SP35    | - |
| ENSG00000212560 | 5.13E-15 | -2.63127 | 1 | 1 RNU6-630P   | - |
| ENSG00000212561 | 5.13E-15 | -2.63127 | 1 | 1 RNU6-381P   | - |
| ENSG00000212564 | 5.13E-15 | -2.63127 | 1 | 1 RNU6-1326P  | - |
| ENSG00000212565 | 5.13E-15 | -2.63127 | 1 | 1 SNORA68     | - |
| ENSG00000212567 | 5.13E-15 | -2.63127 | 1 | 1 SNORA57     | - |
| ENSG00000212568 | 5.13E-15 | -2.63127 | 1 | 1 RNU6-1254P  | - |

|                 |          |          |   |                |        |
|-----------------|----------|----------|---|----------------|--------|
| ENSG00000212571 | 5.13E-15 | -2.63127 | 1 | 1 RNA5SP482    | --     |
| ENSG00000212576 | 5.13E-15 | -2.63127 | 1 | 1 RNA5SP467    | --     |
| ENSG00000212579 | 5.13E-15 | -2.63127 | 1 | 1 SNORA40      | --     |
| ENSG00000212580 | 5.13E-15 | -2.63127 | 1 | 1 SNORA75      | --     |
| ENSG00000212581 | 5.13E-15 | -2.63127 | 1 | 1 U8           | --     |
| ENSG00000212582 | 5.13E-15 | -2.63127 | 1 | 1 Y_RNA        | --     |
| ENSG00000212584 | 5.13E-15 | -2.63127 | 1 | 1 RNU6-587P    | --     |
| ENSG00000212585 | 5.13E-15 | -2.63127 | 1 | 1 Y_RNA        | --     |
| ENSG00000212586 | 5.13E-15 | -2.63127 | 1 | 1 SNORA8       | --     |
| ENSG00000212587 | 5.13E-15 | -2.63127 | 1 | 1 SNORA40      | --     |
| ENSG00000212589 | 5.13E-15 | -2.63127 | 1 | 1 SNORA17      | --     |
| ENSG00000212590 | 5.13E-15 | -2.63127 | 1 | 1 SNORA26      | --     |
| ENSG00000212593 | 5.13E-15 | -2.63127 | 1 | 1 SNORA75      | --     |
| ENSG00000212594 | 5.13E-15 | -2.63127 | 1 | 1 U8           | --     |
| ENSG00000212595 | 5.13E-15 | -2.63127 | 1 | 1 5S_rRNA      | --     |
| ENSG00000212597 | 5.13E-15 | -2.63127 | 1 | 1 RNU6-876P    | --     |
| ENSG00000212598 | 5.13E-15 | -2.63127 | 1 | 1 U3           | --     |
| ENSG00000212599 | 5.13E-15 | -2.63127 | 1 | 1 RNU6-279P    | --     |
| ENSG00000212601 | 5.13E-15 | -2.63127 | 1 | 1 RNA5SP53     | --     |
| ENSG00000212604 | 5.13E-15 | -2.63127 | 1 | 1 SNORA48      | --     |
| ENSG00000212608 | 5.13E-15 | -2.63127 | 1 | 1 SNORA26      | --     |
| ENSG00000212609 | 5.13E-15 | -2.63127 | 1 | 1 RNU1-139P    | --     |
| ENSG00000212610 | 5.13E-15 | -2.63127 | 1 | 1 U3           | --     |
| ENSG00000212611 | 5.13E-15 | -2.63127 | 1 | 1 SNORD30      | --     |
| ENSG00000212612 | 5.13E-15 | -2.63127 | 1 | 1 RNU6-1239P   | --     |
| ENSG00000212615 | 5.13E-15 | -2.63127 | 1 | 1 SNORD58      | --     |
| ENSG00000212618 | 5.13E-15 | -2.63127 | 1 | 1 snoMBII-202  | --     |
| ENSG00000212620 | 5.13E-15 | -2.63127 | 1 | 1 SNORA75      | --     |
| ENSG00000212623 | 5.13E-15 | -2.63127 | 1 | 1 RNU6-493P    | --     |
| ENSG00000212624 | 5.13E-15 | -2.63127 | 1 | 1 SNORA26      | --     |
| ENSG00000212625 | 5.13E-15 | -2.63127 | 1 | 1 RNA5SP397    | --     |
| ENSG00000212626 | 5.13E-15 | -2.63127 | 1 | 1 SNORA48      | --     |
| ENSG00000212628 | 5.13E-15 | -2.63127 | 1 | 1 RNA5SP241    | --     |
| ENSG00000212657 | 5.13E-15 | -2.63127 | 1 | 1 KRTAP16-1    | --     |
| ENSG00000212658 | 5.13E-15 | -2.63127 | 1 | 1 KRTAP29-1    | --     |
| ENSG00000212659 | 5.13E-15 | -2.63127 | 1 | 1 KRTAP9-6     | K11447 |
| ENSG00000212663 | 5.13E-15 | -2.63127 | 1 | 1 RP1-122K4.3  | --     |
| ENSG00000212695 | 5.13E-15 | -2.63127 | 1 | 1 RP11-134K1.2 | K02882 |
| ENSG00000212712 | 5.13E-15 | -2.63127 | 1 | 1 AP002414.1   | K10392 |
| ENSG00000212717 | 5.13E-15 | -2.63127 | 1 | 1 DEFB117      | --     |
| ENSG00000212721 | 5.13E-15 | -2.63127 | 1 | 1 KRTAP4-11    | --     |
| ENSG00000212722 | 5.13E-15 | -2.63127 | 1 | 1 KRTAP4-9     | --     |
| ENSG00000212724 | 5.13E-15 | -2.63127 | 1 | 1 KRTAP2-3     | --     |
| ENSG00000212725 | 5.13E-15 | -2.63127 | 1 | 1 KRTAP2-1     | --     |
| ENSG00000212768 | 5.13E-15 | -2.63127 | 1 | 1 AC114546.1   | K12874 |
| ENSG00000212769 | 5.13E-15 | -2.63127 | 1 | 1 HMGN2P8      | K11300 |
| ENSG00000212807 | 5.13E-15 | -2.63127 | 1 | 1 OR2A42       | K04257 |
| ENSG00000212855 | 5.13E-15 | -2.63127 | 1 | 1 TTTY2        | --     |
| ENSG00000212856 | 5.13E-15 | -2.63127 | 1 | 1 TTTY2B       | --     |
| ENSG00000212899 | 5.13E-15 | -2.63127 | 1 | 1 KRTAP3-3     | --     |
| ENSG00000212900 | 5.13E-15 | -2.63127 | 1 | 1 KRTAP3-2     | --     |
| ENSG00000212901 | 5.13E-15 | -2.63127 | 1 | 1 KRTAP3-1     | --     |
| ENSG00000212916 | 5.13E-15 | -2.63127 | 1 | 1 MAP10        | --     |
| ENSG00000212928 | 5.13E-15 | -2.63127 | 1 | 1 AL391152.1   | --     |
| ENSG00000212932 | 5.13E-15 | -2.63127 | 1 | 1 RPL23AP4     | K02893 |
| ENSG00000212933 | 5.13E-15 | -2.63127 | 1 | 1 KRTAP12-4    | --     |
| ENSG00000212935 | 5.13E-15 | -2.63127 | 1 | 1 KRTAP10-3    | --     |
| ENSG00000212938 | 5.13E-15 | -2.63127 | 1 | 1 KRTAP6-3     | --     |

|                 |          |          |   |                 |        |
|-----------------|----------|----------|---|-----------------|--------|
| ENSG00000212951 | 5.13E-15 | -2.63127 | 1 | 1 RP11-211N8.3  | -      |
| ENSG00000212952 | 5.13E-15 | -2.63127 | 1 | 1 BX088651.1    | -      |
| ENSG00000212961 | 5.13E-15 | -2.63127 | 1 | 1 HNRNPA1P40    | K12741 |
| ENSG00000212989 | 5.13E-15 | -2.63127 | 1 | 1 RP11-351E7.2  | -      |
| ENSG00000212997 | 5.13E-15 | -2.63127 | 1 | 1 AC023632.1    | -      |
| ENSG00000212999 | 5.13E-15 | -2.63127 | 1 | 1 AC117834.1    | -      |
| ENSG00000213002 | 5.13E-15 | -2.63127 | 1 | 1 AC120194.1    | -      |
| ENSG00000213003 | 5.13E-15 | -2.63127 | 1 | 1 BTF3P12       | K01527 |
| ENSG00000213005 | 5.13E-15 | -2.63127 | 1 | 1 PTTG3P        | K06635 |
| ENSG00000213016 | 5.13E-15 | -2.63127 | 1 | 1 AC008746.9    | K06725 |
| ENSG00000213022 | 5.13E-15 | -2.63127 | 1 | 1 KLK9          | K09618 |
| ENSG00000213023 | 5.13E-15 | -2.63127 | 1 | 1 SYT3          | K15290 |
| ENSG00000213026 | 5.13E-15 | -2.63127 | 1 | 1 CFL1P4        | K05765 |
| ENSG00000213028 | 5.13E-15 | -2.63127 | 1 | 1 RP11-108F13.2 | -      |
| ENSG00000213029 | 5.13E-15 | -2.63127 | 1 | 1 SPHAR         | -      |
| ENSG00000213030 | 5.13E-15 | -2.63127 | 1 | 1 CGB8          | K10045 |
| ENSG00000213032 | 5.13E-15 | -2.63127 | 1 | 1 NDUFA3P3      | K03947 |
| ENSG00000213035 | 5.13E-15 | -2.63127 | 1 | 1 RPL23AP80     | K02893 |
| ENSG00000213036 | 5.13E-15 | -2.63127 | 1 | 1 RP11-365D23.4 | K12399 |
| ENSG00000213045 | 5.13E-15 | -2.63127 | 1 | 1 RP11-532L16.1 | -      |
| ENSG00000213046 | 5.13E-15 | -2.63127 | 1 | 1 EEF1A1P32     | K03231 |
| ENSG00000213048 | 5.13E-15 | -2.63127 | 1 | 1 OR5S1P        | K04257 |
| ENSG00000213050 | 5.13E-15 | -2.63127 | 1 | 1 TPM3P1        | K09290 |
| ENSG00000213051 | 5.13E-15 | -2.63127 | 1 | 1 RPL5P5        | K02932 |
| ENSG00000213060 | 5.13E-15 | -2.63127 | 1 | 1 RP4-612B18.3  | K02958 |
| ENSG00000213063 | 5.13E-15 | -2.63127 | 1 | 1 RPL29P7       | K02905 |
| ENSG00000213065 | 5.13E-15 | -2.63127 | 1 | 1 RP3-431P23.2  | -      |
| ENSG00000213067 | 5.13E-15 | -2.63127 | 1 | 1 RP11-760D2.10 | K13197 |
| ENSG00000213068 | 5.13E-15 | -2.63127 | 1 | 1 RP11-277B15.1 | K02962 |
| ENSG00000213069 | 5.13E-15 | -2.63127 | 1 | 1 KRT8P40       | K07605 |
| ENSG00000213070 | 5.13E-15 | -2.63127 | 1 | 1 HMGB3P6       | K11296 |
| ENSG00000213071 | 5.13E-15 | -2.63127 | 1 | 1 LPAL2         | K09644 |
| ENSG00000213075 | 5.13E-15 | -2.63127 | 1 | 1 RPL31P11      | K02910 |
| ENSG00000213076 | 5.13E-15 | -2.63127 | 1 | 1 yR211F11.2    | K08516 |
| ENSG00000213078 | 5.13E-15 | -2.63127 | 1 | 1 RP5-933K21.2  | K10251 |
| ENSG00000213081 | 5.13E-15 | -2.63127 | 1 | 1 AC012362.3    | K05757 |
| ENSG00000213082 | 5.13E-15 | -2.63127 | 1 | 1 PPP1R14BP2    | K17555 |
| ENSG00000213083 | 5.13E-15 | -2.63127 | 1 | 1 AC010731.6    | -      |
| ENSG00000213084 | 5.13E-15 | -2.63127 | 1 | 1 AC008555.2    | K17985 |
| ENSG00000213087 | 5.13E-15 | -2.63127 | 1 | 1 RP11-613F7.1  | K02951 |
| ENSG00000213088 | 5.13E-15 | -2.63127 | 1 | 1 DARC          | K06574 |
| ENSG00000213091 | 5.13E-15 | -2.63127 | 1 | 1 PHBP1         | K17080 |
| ENSG00000213100 | 5.13E-15 | -2.63127 | 1 | 1 KRT18P68      | K07604 |
| ENSG00000213107 | 5.13E-15 | -2.63127 | 1 | 1 AHCYP5        | K01251 |
| ENSG00000213108 | 5.13E-15 | -2.63127 | 1 | 1 BTF3L4P3      | K01527 |
| ENSG00000213109 | 5.13E-15 | -2.63127 | 1 | 1 RP11-55K22.2  | K02936 |
| ENSG00000213110 | 5.13E-15 | -2.63127 | 1 | 1 AC019178.2    | K11980 |
| ENSG00000213113 | 5.13E-15 | -2.63127 | 1 | 1 TUBB8P8       | K07375 |
| ENSG00000213115 | 5.13E-15 | -2.63127 | 1 | 1 AC104131.1    | -      |
| ENSG00000213117 | 5.13E-15 | -2.63127 | 1 | 1 RP3-352A20.1  | K06990 |
| ENSG00000213120 | 5.13E-15 | -2.63127 | 1 | 1 LIN28AP1      | K18754 |
| ENSG00000213121 | 5.13E-15 | -2.63127 | 1 | 1 AL590867.1    | -      |
| ENSG00000213122 | 5.13E-15 | -2.63127 | 1 | 1 RPL23AP46     | K02893 |
| ENSG00000213126 | 5.13E-15 | -2.63127 | 1 | 1 AC092642.1    | K12859 |
| ENSG00000213128 | 5.13E-15 | -2.63127 | 1 | 1 RPL32P31      | K02912 |
| ENSG00000213133 | 5.13E-15 | -2.63127 | 1 | 1 PPP1R14BP5    | K17555 |
| ENSG00000213137 | 5.13E-15 | -2.63127 | 1 | 1 ARF1P2        | K07937 |
| ENSG00000213140 | 5.13E-15 | -2.63127 | 1 | 1 ELK2AP        | K04375 |

|                 |          |          |   |                 |        |
|-----------------|----------|----------|---|-----------------|--------|
| ENSG00000213147 | 5.13E-15 | -2.63127 | 1 | 1 RPL23AP60     | K02893 |
| ENSG00000213148 | 5.13E-15 | -2.63127 | 1 | 1 AC073465.1    | -      |
| ENSG00000213150 | 5.13E-15 | -2.63127 | 1 | 1 RP11-346C16.2 | K06124 |
| ENSG00000213152 | 5.13E-15 | -2.63127 | 1 | 1 RPL7AP60      | K02936 |
| ENSG00000213153 | 5.13E-15 | -2.63127 | 1 | 1 RP11-259P6.3  | -      |
| ENSG00000213155 | 5.13E-15 | -2.63127 | 1 | 1 RP11-252O18.3 | -      |
| ENSG00000213157 | 5.13E-15 | -2.63127 | 1 | 1 RP11-259P15.1 | K02912 |
| ENSG00000213158 | 5.13E-15 | -2.63127 | 1 | 1 GAPDHP36      | K00134 |
| ENSG00000213159 | 5.13E-15 | -2.63127 | 1 | 1 CEND1P1       | -      |
| ENSG00000213165 | 5.13E-15 | -2.63127 | 1 | 1 AC090425.1    | K12581 |
| ENSG00000213167 | 5.13E-15 | -2.63127 | 1 | 1 AL591516.4    | K17985 |
| ENSG00000213170 | 5.13E-15 | -2.63127 | 1 | 1 RP11-81B10.2  | K07953 |
| ENSG00000213171 | 5.13E-15 | -2.63127 | 1 | 1 LINGO4        | -      |
| ENSG00000213172 | 5.13E-15 | -2.63127 | 1 | 1 RP1-228H13.2  | K02865 |
| ENSG00000213174 | 5.13E-15 | -2.63127 | 1 | 1 RP11-373E16.1 | K02903 |
| ENSG00000213176 | 5.13E-15 | -2.63127 | 1 | 1 RPL13P6       | K02873 |
| ENSG00000213177 | 5.13E-15 | -2.63127 | 1 | 1 PRDX2P4       | K03386 |
| ENSG00000213179 | 5.13E-15 | -2.63127 | 1 | 1 RPL17P41      | K02880 |
| ENSG00000213180 | 5.13E-15 | -2.63127 | 1 | 1 RPL36AP48     | K02929 |
| ENSG00000213181 | 5.13E-15 | -2.63127 | 1 | 1 OR10N1P       | K04257 |
| ENSG00000213182 | 5.13E-15 | -2.63127 | 1 | 1 OR10D5P       | K04257 |
| ENSG00000213183 | 5.13E-15 | -2.63127 | 1 | 1 RPS7P8        | K02993 |
| ENSG00000213184 | 5.13E-15 | -2.63127 | 1 | 1 RP11-335F8.2  | K10684 |
| ENSG00000213187 | 5.13E-15 | -2.63127 | 1 | 1 COPS5P1       | K09613 |
| ENSG00000213194 | 5.13E-15 | -2.63127 | 1 | 1 AC016732.2    | K02202 |
| ENSG00000213197 | 5.13E-15 | -2.63127 | 1 | 1 AC012066.1    | -      |
| ENSG00000213201 | 5.13E-15 | -2.63127 | 1 | 1 FABP5P10      | K08754 |
| ENSG00000213203 | 5.13E-15 | -2.63127 | 1 | 1 GIMAP1        | -      |
| ENSG00000213205 | 5.13E-15 | -2.63127 | 1 | 1 STRADBP1      | K17532 |
| ENSG00000213209 | 5.13E-15 | -2.63127 | 1 | 1 AC005229.7    | -      |
| ENSG00000213210 | 5.13E-15 | -2.63127 | 1 | 1 AC005229.5    | K02912 |
| ENSG00000213211 | 5.13E-15 | -2.63127 | 1 | 1 KRT18P64      | K07604 |
| ENSG00000213215 | 5.13E-15 | -2.63127 | 1 | 1 OR2F1         | K04257 |
| ENSG00000213218 | 5.13E-15 | -2.63127 | 1 | 1 CSH2          | K05438 |
| ENSG00000213226 | 5.13E-15 | -2.63127 | 1 | 1 RP11-337C18.4 | K13948 |
| ENSG00000213231 | 5.13E-15 | -2.63127 | 1 | 1 TCL1B         | K16836 |
| ENSG00000213232 | 5.13E-15 | -2.63127 | 1 | 1 PPP1R2P10     | K16833 |
| ENSG00000213233 | 5.13E-15 | -2.63127 | 1 | 1 RPL23AP62     | K02893 |
| ENSG00000213234 | 5.13E-15 | -2.63127 | 1 | 1 ST13P10       | K09560 |
| ENSG00000213235 | 5.13E-15 | -2.63127 | 1 | 1 EEF1A1P16     | K03231 |
| ENSG00000213237 | 5.13E-15 | -2.63127 | 1 | 1 AC008155.1    | K13784 |
| ENSG00000213238 | 5.13E-15 | -2.63127 | 1 | 1 AC008155.2    | K02962 |
| ENSG00000213244 | 5.13E-15 | -2.63127 | 1 | 1 HIST2H3DP1    | K11253 |
| ENSG00000213247 | 5.13E-15 | -2.63127 | 1 | 1 RP11-479A21.1 | -      |
| ENSG00000213264 | 5.13E-15 | -2.63127 | 1 | 1 NIP7P2        | K07565 |
| ENSG00000213265 | 5.13E-15 | -2.63127 | 1 | 1 TSGA13        | K04613 |
| ENSG00000213269 | 5.13E-15 | -2.63127 | 1 | 1 AC004386.4    | K02991 |
| ENSG00000213270 | 5.13E-15 | -2.63127 | 1 | 1 RPL6P25       | K02934 |
| ENSG00000213272 | 5.13E-15 | -2.63127 | 1 | 1 RP11-613M5.1  | K02936 |
| ENSG00000213275 | 5.13E-15 | -2.63127 | 1 | 1 IFITM9P       | K06566 |
| ENSG00000213285 | 5.13E-15 | -2.63127 | 1 | 1 AC138031.1    | K02893 |
| ENSG00000213287 | 5.13E-15 | -2.63127 | 1 | 1 RP11-680L20.1 | K17769 |
| ENSG00000213291 | 5.13E-15 | -2.63127 | 1 | 1 RP11-420H19.3 | K02910 |
| ENSG00000213295 | 5.13E-15 | -2.63127 | 1 | 1 AC092106.2    | K02891 |
| ENSG00000213296 | 5.13E-15 | -2.63127 | 1 | 1 RP5-1106E3.1  | K02981 |
| ENSG00000213297 | 5.13E-15 | -2.63127 | 1 | 1 ZNF625-ZNF20  | K09228 |
| ENSG00000213301 | 5.13E-15 | -2.63127 | 1 | 1 HMGB3P11      | K11296 |
| ENSG00000213302 | 5.13E-15 | -2.63127 | 1 | 1 RP11-560I19.2 | K02910 |

|                 |          |          |   |                 |        |
|-----------------|----------|----------|---|-----------------|--------|
| ENSG00000213303 | 5.13E-15 | -2.63127 | 1 | 1 CTC-398G3.2   | K02951 |
| ENSG00000213304 | 5.13E-15 | -2.63127 | 1 | 1 CTC-398G3.1   | K02882 |
| ENSG00000213305 | 5.13E-15 | -2.63127 | 1 | 1 HNRNPCP6      | K12884 |
| ENSG00000213307 | 5.13E-15 | -2.63127 | 1 | 1 RPL18P11      | K02883 |
| ENSG00000213309 | 5.13E-15 | -2.63127 | 1 | 1 RPL9P18       | K02940 |
| ENSG00000213310 | 5.13E-15 | -2.63127 | 1 | 1 CYCSP19       | K08738 |
| ENSG00000213316 | 5.13E-15 | -2.63127 | 1 | 1 LTC4S         | K00807 |
| ENSG00000213318 | 5.13E-15 | -2.63127 | 1 | 1 RP11-331F4.1  | K02987 |
| ENSG00000213328 | 5.13E-15 | -2.63127 | 1 | 1 RP11-281O15.2 | K17823 |
| ENSG00000213331 | 5.13E-15 | -2.63127 | 1 | 1 RP11-713C19.2 | K11188 |
| ENSG00000213332 | 5.13E-15 | -2.63127 | 1 | 1 SLC25A5P6     | K05863 |
| ENSG00000213333 | 5.13E-15 | -2.63127 | 1 | 1 NPM1P50       | K11276 |
| ENSG00000213335 | 5.13E-15 | -2.63127 | 1 | 1 CLNS1AP1      | K05019 |
| ENSG00000213338 | 5.13E-15 | -2.63127 | 1 | 1 ATF4P1        | K04374 |
| ENSG00000213343 | 5.13E-15 | -2.63127 | 1 | 1 RP11-118B13.1 | K02889 |
| ENSG00000213344 | 5.13E-15 | -2.63127 | 1 | 1 PCNPP3        | —      |
| ENSG00000213355 | 5.13E-15 | -2.63127 | 1 | 1 CNN2P8        | —      |
| ENSG00000213356 | 5.13E-15 | -2.63127 | 1 | 1 AC018696.6    | K17985 |
| ENSG00000213358 | 5.13E-15 | -2.63127 | 1 | 1 AC092933.4    | K15696 |
| ENSG00000213361 | 5.13E-15 | -2.63127 | 1 | 1 RP4-778K6.1   | K02920 |
| ENSG00000213362 | 5.13E-15 | -2.63127 | 1 | 1 FTH1P12       | K00522 |
| ENSG00000213363 | 5.13E-15 | -2.63127 | 1 | 1 RPS3P6        | K02985 |
| ENSG00000213365 | 5.13E-15 | -2.63127 | 1 | 1 AP000593.6    | K12836 |
| ENSG00000213368 | 5.13E-15 | -2.63127 | 1 | 1 ST13P11       | K09560 |
| ENSG00000213370 | 5.13E-15 | -2.63127 | 1 | 1 RANP6         | K07936 |
| ENSG00000213371 | 5.13E-15 | -2.63127 | 1 | 1 NAP1L1P3      | K11279 |
| ENSG00000213373 | 5.13E-15 | -2.63127 | 1 | 1 LINC00671     | —      |
| ENSG00000213375 | 5.13E-15 | -2.63127 | 1 | 1 AC068279.1    | K17985 |
| ENSG00000213383 | 5.13E-15 | -2.63127 | 1 | 1 AC104297.1    | K01507 |
| ENSG00000213384 | 5.13E-15 | -2.63127 | 1 | 1 EIF4E2P1      | K03259 |
| ENSG00000213386 | 5.13E-15 | -2.63127 | 1 | 1 RP11-779O18.2 | —      |
| ENSG00000213391 | 5.13E-15 | -2.63127 | 1 | 1 RP11-66N11.6  | —      |
| ENSG00000213393 | 5.13E-15 | -2.63127 | 1 | 1 RP11-546B8.1  | K02885 |
| ENSG00000213397 | 5.13E-15 | -2.63127 | 1 | 1 HAUS7         | K16590 |
| ENSG00000213399 | 5.13E-15 | -2.63127 | 1 | 1 AC022210.2    | K02981 |
| ENSG00000213400 | 5.13E-15 | -2.63127 | 1 | 1 RPL12P18      | K02870 |
| ENSG00000213403 | 5.13E-15 | -2.63127 | 1 | 1 CISD1P1       | —      |
| ENSG00000213406 | 5.13E-15 | -2.63127 | 1 | 1 ANXA2P1       | K17092 |
| ENSG00000213410 | 5.13E-15 | -2.63127 | 1 | 1 AC009951.2    | K12022 |
| ENSG00000213411 | 5.13E-15 | -2.63127 | 1 | 1 RBM22P2       | K12872 |
| ENSG00000213414 | 5.13E-15 | -2.63127 | 1 | 1 CTB-47B8.5    | K09554 |
| ENSG00000213416 | 5.13E-15 | -2.63127 | 1 | 1 KRTAP4-12     | —      |
| ENSG00000213417 | 5.13E-15 | -2.63127 | 1 | 1 KRTAP2-4      | —      |
| ENSG00000213421 | 5.13E-15 | -2.63127 | 1 | 1 RP11-84O12.2  | K02936 |
| ENSG00000213423 | 5.13E-15 | -2.63127 | 1 | 1 RBMX2P2       | K13107 |
| ENSG00000213424 | 5.13E-15 | -2.63127 | 1 | 1 KRT222        | —      |
| ENSG00000213431 | 5.13E-15 | -2.63127 | 1 | 1 RP11-301G23.1 | —      |
| ENSG00000213435 | 5.13E-15 | -2.63127 | 1 | 1 ATP6V0CP3     | K02155 |
| ENSG00000213439 | 5.13E-15 | -2.63127 | 1 | 1 OR5AC1        | K04257 |
| ENSG00000213440 | 5.13E-15 | -2.63127 | 1 | 1 H2AFZP1       | K11251 |
| ENSG00000213448 | 5.13E-15 | -2.63127 | 1 | 1 RPS23P2       | K02973 |
| ENSG00000213449 | 5.13E-15 | -2.63127 | 1 | 1 GAPDHP28      | K00134 |
| ENSG00000213450 | 5.13E-15 | -2.63127 | 1 | 1 VDAC1P7       | K05862 |
| ENSG00000213451 | 5.13E-15 | -2.63127 | 1 | 1 OR6C69P       | K04257 |
| ENSG00000213452 | 5.13E-15 | -2.63127 | 1 | 1 AKR1B1P2      | K00011 |
| ENSG00000213455 | 5.13E-15 | -2.63127 | 1 | 1 AC091654.7    | K03767 |
| ENSG00000213461 | 5.13E-15 | -2.63127 | 1 | 1 RP13-235E23.1 | K02912 |
| ENSG00000213467 | 5.13E-15 | -2.63127 | 1 | 1 HMGB1P37      | K10802 |



|                 |          |          |   |                 |        |
|-----------------|----------|----------|---|-----------------|--------|
| ENSG00000213470 | 5.13E-15 | -2.63127 | 1 | 1 RP11-972K6.1  | K02910 |
| ENSG00000213478 | 5.13E-15 | -2.63127 | 1 | 1 CFL1P2        | K05765 |
| ENSG00000213480 | 5.13E-15 | -2.63127 | 1 | 1 RP11-364P2.2  | —      |
| ENSG00000213483 | 5.13E-15 | -2.63127 | 1 | 1 NDUFAF4P2     | K18161 |
| ENSG00000213484 | 5.13E-15 | -2.63127 | 1 | 1 EIF4A1P8      | K03257 |
| ENSG00000213486 | 5.13E-15 | -2.63127 | 1 | 1 AC108039.1    | K02875 |
| ENSG00000213487 | 5.13E-15 | -2.63127 | 1 | 1 ASS1P4        | K01940 |
| ENSG00000213488 | 5.13E-15 | -2.63127 | 1 | 1 CTB-85P21.1   | K02940 |
| ENSG00000213489 | 5.13E-15 | -2.63127 | 1 | 1 RP13-147D17.1 | —      |
| ENSG00000213493 | 5.13E-15 | -2.63127 | 1 | 1 ACTN4P1       | K05699 |
| ENSG00000213494 | 5.13E-15 | -2.63127 | 1 | 1 CCL14         | K05514 |
| ENSG00000213495 | 5.13E-15 | -2.63127 | 1 | 1 RP11-416L21.1 | K02898 |
| ENSG00000213498 | 5.13E-15 | -2.63127 | 1 | 1 TPT1P13       | —      |
| ENSG00000213500 | 5.13E-15 | -2.63127 | 1 | 1 LAP3P2        | K11142 |
| ENSG00000213509 | 5.13E-15 | -2.63127 | 1 | 1 PPIAP16       | K03767 |
| ENSG00000213512 | 5.13E-15 | -2.63127 | 1 | 1 GBP7          | —      |
| ENSG00000213522 | 5.13E-15 | -2.63127 | 1 | 1 RAC1P5        | K04392 |
| ENSG00000213525 | 5.13E-15 | -2.63127 | 1 | 1 RP11-383B24.3 | —      |
| ENSG00000213526 | 5.13E-15 | -2.63127 | 1 | 1 SETP8         | K11290 |
| ENSG00000213527 | 5.13E-15 | -2.63127 | 1 | 1 RP11-591L14.1 | K02951 |
| ENSG00000213530 | 5.13E-15 | -2.63127 | 1 | 1 MTHFD2P5      | K13403 |
| ENSG00000213536 | 5.13E-15 | -2.63127 | 1 | 1 GNG5P1        | K04542 |
| ENSG00000213538 | 5.13E-15 | -2.63127 | 1 | 1 KRT8P41       | K07605 |
| ENSG00000213539 | 5.13E-15 | -2.63127 | 1 | 1 YBX1P6        | K09276 |
| ENSG00000213543 | 5.13E-15 | -2.63127 | 1 | 1 RARRES2P2     | K10044 |
| ENSG00000213547 | 5.13E-15 | -2.63127 | 1 | 1 VN1R64P       | K04614 |
| ENSG00000213548 | 5.13E-15 | -2.63127 | 1 | 1 AC005522.6    | K03767 |
| ENSG00000213549 | 5.13E-15 | -2.63127 | 1 | 1 AC005077.8    | K03687 |
| ENSG00000213558 | 5.13E-15 | -2.63127 | 1 | 1 HMGN2P32      | K11300 |
| ENSG00000213560 | 5.13E-15 | -2.63127 | 1 | 1 RP11-386I14.3 | K13251 |
| ENSG00000213561 | 5.13E-15 | -2.63127 | 1 | 1 RP11-386I14.2 | K13566 |
| ENSG00000213568 | 5.13E-15 | -2.63127 | 1 | 1 HNRNPA1P13    | K12741 |
| ENSG00000213574 | 5.13E-15 | -2.63127 | 1 | 1 LDHAP5        | K00016 |
| ENSG00000213578 | 5.13E-15 | -2.63127 | 1 | 1 CPLX3         | K15295 |
| ENSG00000213579 | 5.13E-15 | -2.63127 | 1 | 1 RP4-595K12.1  | K02905 |
| ENSG00000213587 | 5.13E-15 | -2.63127 | 1 | 1 RP11-646D13.1 | K03767 |
| ENSG00000213588 | 5.13E-15 | -2.63127 | 1 | 1 ZBTB9         | K10496 |
| ENSG00000213594 | 5.13E-15 | -2.63127 | 1 | 1 GAPDHP25      | K00134 |
| ENSG00000213599 | 5.13E-15 | -2.63127 | 1 | 1 SLX1A-SULT1A3 | —      |
| ENSG00000213600 | 5.13E-15 | -2.63127 | 1 | 1 U73169.1      | —      |
| ENSG00000213601 | 5.13E-15 | -2.63127 | 1 | 1 KRT18P19      | K07604 |
| ENSG00000213604 | 5.13E-15 | -2.63127 | 1 | 1 RP11-444K7.8  | —      |
| ENSG00000213605 | 5.13E-15 | -2.63127 | 1 | 1 AC111200.2    | K02976 |
| ENSG00000213606 | 5.13E-15 | -2.63127 | 1 | 1 AKR1B10P1     | K00011 |
| ENSG00000213607 | 5.13E-15 | -2.63127 | 1 | 1 OR4A45P       | K04257 |
| ENSG00000213608 | 5.13E-15 | -2.63127 | 1 | 1 SLC25A14P1    | K15106 |
| ENSG00000213620 | 5.13E-15 | -2.63127 | 1 | 1 AL121657.4    | K02889 |
| ENSG00000213622 | 5.13E-15 | -2.63127 | 1 | 1 AL163952.1    | —      |
| ENSG00000213630 | 5.13E-15 | -2.63127 | 1 | 1 RP11-772E11.1 | —      |
| ENSG00000213640 | 5.13E-15 | -2.63127 | 1 | 1 RP11-797H7.3  | K15410 |
| ENSG00000213641 | 5.13E-15 | -2.63127 | 1 | 1 RPL7AP4       | K02936 |
| ENSG00000213642 | 5.13E-15 | -2.63127 | 1 | 1 RP11-561N12.5 | K06773 |
| ENSG00000213643 | 5.13E-15 | -2.63127 | 1 | 1 VN1R37P       | K04614 |
| ENSG00000213644 | 5.13E-15 | -2.63127 | 1 | 1 RP11-165H4.3  | —      |
| ENSG00000213645 | 5.13E-15 | -2.63127 | 1 | 1 SLC25A1P3     | K15100 |
| ENSG00000213650 | 5.13E-15 | -2.63127 | 1 | 1 RP11-760D2.7  | K06630 |
| ENSG00000213652 | 5.13E-15 | -2.63127 | 1 | 1 HMGB3P30      | K11296 |
| ENSG00000213653 | 5.13E-15 | -2.63127 | 1 | 1 RPL22P22      | K02891 |

|                 |          |          |   |                 |        |
|-----------------|----------|----------|---|-----------------|--------|
| ENSG00000213654 | 5.13E-15 | -2.63127 | 1 | 1 GPSM3         | K15838 |
| ENSG00000213655 | 5.13E-15 | -2.63127 | 1 | 1 CTD-2347I17.1 | K12160 |
| ENSG00000213657 | 5.13E-15 | -2.63127 | 1 | 1 RP11-346D6.4  | K02910 |
| ENSG00000213659 | 5.13E-15 | -2.63127 | 1 | 1 RSU1P3        | —      |
| ENSG00000213661 | 5.13E-15 | -2.63127 | 1 | 1 RP11-510I6.2  | K02883 |
| ENSG00000213663 | 5.13E-15 | -2.63127 | 1 | 1 CTD-2158P22.1 | K02889 |
| ENSG00000213664 | 5.13E-15 | -2.63127 | 1 | 1 RPS16P8       | K02960 |
| ENSG00000213667 | 5.13E-15 | -2.63127 | 1 | 1 PGGT1BP1      | K11713 |
| ENSG00000213669 | 5.13E-15 | -2.63127 | 1 | 1 RP11-476B13.2 | K02889 |
| ENSG00000213684 | 5.13E-15 | -2.63127 | 1 | 1 LDHBP2        | K00016 |
| ENSG00000213686 | 5.13E-15 | -2.63127 | 1 | 1 DUSP8P1       | K04459 |
| ENSG00000213690 | 5.13E-15 | -2.63127 | 1 | 1 RP11-513D4.1  | —      |
| ENSG00000213695 | 5.13E-15 | -2.63127 | 1 | 1 RPS7P14       | K02993 |
| ENSG00000213697 | 5.13E-15 | -2.63127 | 1 | 1 CTBP2P6       | K04496 |
| ENSG00000213698 | 5.13E-15 | -2.63127 | 1 | 1 RP1-172N19.4  | K10364 |
| ENSG00000213701 | 5.13E-15 | -2.63127 | 1 | 1 SETP22        | K11290 |
| ENSG00000213702 | 5.13E-15 | -2.63127 | 1 | 1 AC008865.1    | —      |
| ENSG00000213704 | 5.13E-15 | -2.63127 | 1 | 1 EEF1A1P15     | K03231 |
| ENSG00000213706 | 5.13E-15 | -2.63127 | 1 | 1 AL590762.7    | K07863 |
| ENSG00000213708 | 5.13E-15 | -2.63127 | 1 | 1 SLC16A14P1    | K08190 |
| ENSG00000213711 | 5.13E-15 | -2.63127 | 1 | 1 PHBP7         | K17080 |
| ENSG00000213716 | 5.13E-15 | -2.63127 | 1 | 1 FABP5P5       | —      |
| ENSG00000213719 | 5.13E-15 | -2.63127 | 1 | 1 CLIC1         | K05021 |
| ENSG00000213721 | 5.13E-15 | -2.63127 | 1 | 1 HMGN2P30      | K11300 |
| ENSG00000213722 | 5.13E-15 | -2.63127 | 1 | 1 DDAH2         | K01482 |
| ENSG00000213724 | 5.13E-15 | -2.63127 | 1 | 1 PRDX2P2       | K03386 |
| ENSG00000213726 | 5.13E-15 | -2.63127 | 1 | 1 RPS2P52       | K02981 |
| ENSG00000213727 | 5.13E-15 | -2.63127 | 1 | 1 LA16c-60G3.7  | —      |
| ENSG00000213729 | 5.13E-15 | -2.63127 | 1 | 1 AC098828.3    | K02960 |
| ENSG00000213730 | 5.13E-15 | -2.63127 | 1 | 1 POLD2P1       | K02328 |
| ENSG00000213735 | 5.13E-15 | -2.63127 | 1 | 1 ANAPC10P1     | K03357 |
| ENSG00000213736 | 5.13E-15 | -2.63127 | 1 | 1 RP11-662I13.1 | K09699 |
| ENSG00000213739 | 5.13E-15 | -2.63127 | 1 | 1 AC007679.1    | K03767 |
| ENSG00000213744 | 5.13E-15 | -2.63127 | 1 | 1 RPS10P14      | K02947 |
| ENSG00000213747 | 5.13E-15 | -2.63127 | 1 | 1 RP13-278H16.2 | K18463 |
| ENSG00000213752 | 5.13E-15 | -2.63127 | 1 | 1 CTA-268H5.9   | K02947 |
| ENSG00000213754 | 5.13E-15 | -2.63127 | 1 | 1 RP11-284B18.3 | K18083 |
| ENSG00000213755 | 5.13E-15 | -2.63127 | 1 | 1 RP11-342F17.1 | K02905 |
| ENSG00000213759 | 5.13E-15 | -2.63127 | 1 | 1 UGT2B11       | K00699 |
| ENSG00000213760 | 5.13E-15 | -2.63127 | 1 | 1 ATP6V1G2      | K02152 |
| ENSG00000213770 | 5.13E-15 | -2.63127 | 1 | 1 FAM210CP      | —      |
| ENSG00000213772 | 5.13E-15 | -2.63127 | 1 | 1 RP11-385J23.1 | K03113 |
| ENSG00000213774 | 5.13E-15 | -2.63127 | 1 | 1 AC010904.1    | —      |
| ENSG00000213777 | 5.13E-15 | -2.63127 | 1 | 1 CTD-2224J9.8  | K04614 |
| ENSG00000213778 | 5.13E-15 | -2.63127 | 1 | 1 HNRNPA1P32    | K12741 |
| ENSG00000213779 | 5.13E-15 | -2.63127 | 1 | 1 RP11-452G18.1 | K02905 |
| ENSG00000213780 | 5.13E-15 | -2.63127 | 1 | 1 GTF2H4        | K03144 |
| ENSG00000213781 | 5.13E-15 | -2.63127 | 1 | 1 PSMC1P2       | K03062 |
| ENSG00000213783 | 5.13E-15 | -2.63127 | 1 | 1 RPL35P4       | K02918 |
| ENSG00000213785 | 5.13E-15 | -2.63127 | 1 | 1 RP11-449L13.2 | K00011 |
| ENSG00000213786 | 5.13E-15 | -2.63127 | 1 | 1 NHP2P2        | K11129 |
| ENSG00000213787 | 5.13E-15 | -2.63127 | 1 | 1 RPL7AP38      | K02936 |
| ENSG00000213790 | 5.13E-15 | -2.63127 | 1 | 1 OLA1P1        | K06942 |
| ENSG00000213791 | 5.13E-15 | -2.63127 | 1 | 1 RP11-941H19.2 | K02989 |
| ENSG00000213798 | 5.13E-15 | -2.63127 | 1 | 1 AC004129.9    | K02936 |
| ENSG00000213816 | 5.13E-15 | -2.63127 | 1 | 1 CNN2P4        | —      |
| ENSG00000213820 | 5.13E-15 | -2.63127 | 1 | 1 RPL13P2       | K02873 |
| ENSG00000213822 | 5.13E-15 | -2.63127 | 1 | 1 CEACAM18      | K06499 |

|                 |          |          |   |                 |        |
|-----------------|----------|----------|---|-----------------|--------|
| ENSG00000213828 | 5.13E-15 | -2.63127 | 1 | 1 AC017028.1    | -      |
| ENSG00000213842 | 5.13E-15 | -2.63127 | 1 | 1 SUGT1P2       | K12795 |
| ENSG00000213849 | 5.13E-15 | -2.63127 | 1 | 1 AC104306.1    | K02910 |
| ENSG00000213851 | 5.13E-15 | -2.63127 | 1 | 1 RP11-324J13.1 | K02981 |
| ENSG00000213854 | 5.13E-15 | -2.63127 | 1 | 1 CNN2P6        | -      |
| ENSG00000213856 | 5.13E-15 | -2.63127 | 1 | 1 VDAC1P2       | K05862 |
| ENSG00000213864 | 5.13E-15 | -2.63127 | 1 | 1 EEF1B2P2      | K03232 |
| ENSG00000213867 | 5.13E-15 | -2.63127 | 1 | 1 RP11-829H16.2 | K02901 |
| ENSG00000213873 | 5.13E-15 | -2.63127 | 1 | 1 RP11-678D18.1 | K03767 |
| ENSG00000213875 | 5.13E-15 | -2.63127 | 1 | 1 AC005019.2    | K02898 |
| ENSG00000213876 | 5.13E-15 | -2.63127 | 1 | 1 RPL7AP64      | -      |
| ENSG00000213877 | 5.13E-15 | -2.63127 | 1 | 1 CFL1P7        | K05765 |
| ENSG00000213880 | 5.13E-15 | -2.63127 | 1 | 1 RPL7AP7       | K02936 |
| ENSG00000213882 | 5.13E-15 | -2.63127 | 1 | 1 CYB5P4        | -      |
| ENSG00000213886 | 5.13E-15 | -2.63127 | 1 | 1 UBD           | K12157 |
| ENSG00000213891 | 5.13E-15 | -2.63127 | 1 | 1 RPL3P6        | K02925 |
| ENSG00000213892 | 5.13E-15 | -2.63127 | 1 | 1 CEACAM16      | K06499 |
| ENSG00000213896 | 5.13E-15 | -2.63127 | 1 | 1 RP11-546M4.1  | K02910 |
| ENSG00000213900 | 5.13E-15 | -2.63127 | 1 | 1 RPS17P1       | K02962 |
| ENSG00000213908 | 5.13E-15 | -2.63127 | 1 | 1 CYP2A7P1      | K17685 |
| ENSG00000213911 | 5.13E-15 | -2.63127 | 1 | 1 OR2G1P        | K04257 |
| ENSG00000213916 | 5.13E-15 | -2.63127 | 1 | 1 RPL13P        | K02873 |
| ENSG00000213917 | 5.13E-15 | -2.63127 | 1 | 1 RPL5P8        | K02932 |
| ENSG00000213921 | 5.13E-15 | -2.63127 | 1 | 1 LEUTX         | -      |
| ENSG00000213922 | 5.13E-15 | -2.63127 | 1 | 1 AC011500.1    | -      |
| ENSG00000213924 | 5.13E-15 | -2.63127 | 1 | 1 HNRNPH1P2     | K12898 |
| ENSG00000213925 | 5.13E-15 | -2.63127 | 1 | 1 NPM1P33       | K11276 |
| ENSG00000213926 | 5.13E-15 | -2.63127 | 1 | 1 MSRB1P1       | K07305 |
| ENSG00000213927 | 5.13E-15 | -2.63127 | 1 | 1 CCL27         | K16598 |
| ENSG00000213934 | 5.13E-15 | -2.63127 | 1 | 1 HBG1          | K13824 |
| ENSG00000213935 | 5.13E-15 | -2.63127 | 1 | 1 AC092610.12   | K02891 |
| ENSG00000213938 | 5.13E-15 | -2.63127 | 1 | 1 SEPHS1P6      | K01008 |
| ENSG00000213940 | 5.13E-15 | -2.63127 | 1 | 1 RP11-94D20.1  | K02872 |
| ENSG00000213946 | 5.13E-15 | -2.63127 | 1 | 1 DNAJB1P1      | K09507 |
| ENSG00000213950 | 5.13E-15 | -2.63127 | 1 | 1 RPS10P2       | K02947 |
| ENSG00000213954 | 5.13E-15 | -2.63127 | 1 | 1 RP11-280O24.1 | K02138 |
| ENSG00000213956 | 5.13E-15 | -2.63127 | 1 | 1 RP11-269M20.1 | K12738 |
| ENSG00000213959 | 5.13E-15 | -2.63127 | 1 | 1 RP5-1100H13.3 | K10733 |
| ENSG00000213962 | 5.13E-15 | -2.63127 | 1 | 1 API5P2        | -      |
| ENSG00000213964 | 5.13E-15 | -2.63127 | 1 | 1 CHCHD4P4      | K17782 |
| ENSG00000213970 | 5.13E-15 | -2.63127 | 1 | 1 RP11-264F23.1 | K02958 |
| ENSG00000213971 | 5.13E-15 | -2.63127 | 1 | 1 RP11-15H20.6  | -      |
| ENSG00000213972 | 5.13E-15 | -2.63127 | 1 | 1 RP3-522P13.2  | K12741 |
| ENSG00000213973 | 5.13E-15 | -2.63127 | 1 | 1 ZNF99         | K09228 |
| ENSG00000213979 | 5.13E-15 | -2.63127 | 1 | 1 RPL7AP14      | K02936 |
| ENSG00000213981 | 5.13E-15 | -2.63127 | 1 | 1 AC007277.3    | -      |
| ENSG00000213987 | 5.13E-15 | -2.63127 | 1 | 1 RP11-399E6.2  | K02929 |
| ENSG00000213988 | 5.13E-15 | -2.63127 | 1 | 1 ZNF90         | K02995 |
| ENSG00000213996 | 5.13E-15 | -2.63127 | 1 | 1 TM6SF2        | -      |
| ENSG00000213997 | 5.13E-15 | -2.63127 | 1 | 1 PGAM1P7       | K01834 |
| ENSG00000214003 | 5.13E-15 | -2.63127 | 1 | 1 ATP5F1P3      | K02127 |
| ENSG00000214009 | 5.13E-15 | -2.63127 | 1 | 1 PCNAP3        | K04802 |
| ENSG00000214012 | 5.13E-15 | -2.63127 | 1 | 1 KRT18P38      | K07604 |
| ENSG00000214015 | 5.13E-15 | -2.63127 | 1 | 1 RP11-414H17.2 | -      |
| ENSG00000214016 | 5.13E-15 | -2.63127 | 1 | 1 RP6-105D16.1  | K02998 |
| ENSG00000214020 | 5.13E-15 | -2.63127 | 1 | 1 FTLP4         | K13625 |
| ENSG00000214024 | 5.13E-15 | -2.63127 | 1 | 1 AC012501.1    | K02893 |
| ENSG00000214025 | 5.13E-15 | -2.63127 | 1 | 1 ATP5F1P4      | K02127 |

|                 |          |          |   |                 |        |
|-----------------|----------|----------|---|-----------------|--------|
| ENSG00000214031 | 5.13E-15 | -2.63127 | 1 | 1 RP11-169L17.3 | K06087 |
| ENSG00000214035 | 5.13E-15 | -2.63127 | 1 | 1 AC073310.4    | K15043 |
| ENSG00000214039 | 5.13E-15 | -2.63127 | 1 | 1 RP11-474D1.3  | -      |
| ENSG00000214041 | 5.13E-15 | -2.63127 | 1 | 1 PGAM1P4       | K01834 |
| ENSG00000214042 | 5.13E-15 | -2.63127 | 1 | 1 IFNA7         | K05414 |
| ENSG00000214043 | 5.13E-15 | -2.63127 | 1 | 1 RP5-944M2.3   | -      |
| ENSG00000214045 | 5.13E-15 | -2.63127 | 1 | 1 RP6-186E3.1   | K00088 |
| ENSG00000214047 | 5.13E-15 | -2.63127 | 1 | 1 RPS11P7       | K02949 |
| ENSG00000214051 | 5.13E-15 | -2.63127 | 1 | 1 ARF4P3        | K07939 |
| ENSG00000214062 | 5.13E-15 | -2.63127 | 1 | 1 RPL7P17       | -      |
| ENSG00000214064 | 5.13E-15 | -2.63127 | 1 | 1 RPL6P5        | -      |
| ENSG00000214067 | 5.13E-15 | -2.63127 | 1 | 1 RP11-549L6.2  | K02889 |
| ENSG00000214070 | 5.13E-15 | -2.63127 | 1 | 1 AC011999.1    | -      |
| ENSG00000214071 | 5.13E-15 | -2.63127 | 1 | 1 RP11-31H15.2  | K00522 |
| ENSG00000214073 | 5.13E-15 | -2.63127 | 1 | 1 RPL21P17      | K02889 |
| ENSG00000214074 | 5.13E-15 | -2.63127 | 1 | 1 RPL23AP39     | K02893 |
| ENSG00000214076 | 5.13E-15 | -2.63127 | 1 | 1 CPSF1P1       | K14401 |
| ENSG00000214077 | 5.13E-15 | -2.63127 | 1 | 1 GNAQP1        | K04634 |
| ENSG00000214089 | 5.13E-15 | -2.63127 | 1 | 1 RP11-256K7.1  | K02940 |
| ENSG00000214097 | 5.13E-15 | -2.63127 | 1 | 1 SMCO1         | -      |
| ENSG00000214100 | 5.13E-15 | -2.63127 | 1 | 1 AC079776.2    | -      |
| ENSG00000214102 | 5.13E-15 | -2.63127 | 1 | 1 WEE2          | K06632 |
| ENSG00000214105 | 5.13E-15 | -2.63127 | 1 | 1 CTD-2116F7.1  | -      |
| ENSG00000214107 | 5.13E-15 | -2.63127 | 1 | 1 MAGEB1        | -      |
| ENSG00000214109 | 5.13E-15 | -2.63127 | 1 | 1 AC008686.1    | K12581 |
| ENSG00000214111 | 5.13E-15 | -2.63127 | 1 | 1 RP1-258N20.3  | K16795 |
| ENSG00000214121 | 5.13E-15 | -2.63127 | 1 | 1 TDPX2         | K13279 |
| ENSG00000214125 | 5.13E-15 | -2.63127 | 1 | 1 RP3-412A9.15  | K11100 |
| ENSG00000214132 | 5.13E-15 | -2.63127 | 1 | 1 RP11-420O16.2 | K14295 |
| ENSG00000214141 | 5.13E-15 | -2.63127 | 1 | 1 ACTN4P2       | K05699 |
| ENSG00000214142 | 5.13E-15 | -2.63127 | 1 | 1 RPL7P60       | K02937 |
| ENSG00000214144 | 5.13E-15 | -2.63127 | 1 | 1 RP11-488L18.1 | K03283 |
| ENSG00000214147 | 5.13E-15 | -2.63127 | 1 | 1 RP11-332P22.2 | K05746 |
| ENSG00000214161 | 5.13E-15 | -2.63127 | 1 | 1 SDC4P         | K16338 |
| ENSG00000214164 | 5.13E-15 | -2.63127 | 1 | 1 AC018696.5    | -      |
| ENSG00000214167 | 5.13E-15 | -2.63127 | 1 | 1 AC005544.1    | -      |
| ENSG00000214178 | 5.13E-15 | -2.63127 | 1 | 1 PPIAP23       | K03767 |
| ENSG00000214179 | 5.13E-15 | -2.63127 | 1 | 1 AC112200.1    | -      |
| ENSG00000214181 | 5.13E-15 | -2.63127 | 1 | 1 DDX6P2        | K12614 |
| ENSG00000214189 | 5.13E-15 | -2.63127 | 1 | 1 ZNF788        | K09228 |
| ENSG00000214190 | 5.13E-15 | -2.63127 | 1 | 1 RP11-12D24.7  | K15705 |
| ENSG00000214195 | 5.13E-15 | -2.63127 | 1 | 1 HMGN2P31      | K11300 |
| ENSG00000214199 | 5.13E-15 | -2.63127 | 1 | 1 EEF1A1P12     | K03231 |
| ENSG00000214200 | 5.13E-15 | -2.63127 | 1 | 1 TPM3P2        | K09290 |
| ENSG00000214203 | 5.13E-15 | -2.63127 | 1 | 1 RPS4XP1       | K02987 |
| ENSG00000214204 | 5.13E-15 | -2.63127 | 1 | 1 HNRNPA1P43    | K12741 |
| ENSG00000214207 | 5.13E-15 | -2.63127 | 1 | 1 KRT18P10      | K07604 |
| ENSG00000214210 | 5.13E-15 | -2.63127 | 1 | 1 RP11-208P4.1  | K17985 |
| ENSG00000214211 | 5.13E-15 | -2.63127 | 1 | 1 CTAGE14P      | -      |
| ENSG00000214215 | 5.13E-15 | -2.63127 | 1 | 1 C12orf74      | -      |
| ENSG00000214216 | 5.13E-15 | -2.63127 | 1 | 1 IQCJ          | -      |
| ENSG00000214243 | 5.13E-15 | -2.63127 | 1 | 1 AC004980.10   | K09228 |
| ENSG00000214244 | 5.13E-15 | -2.63127 | 1 | 1 SETP21        | K11290 |
| ENSG00000214245 | 5.13E-15 | -2.63127 | 1 | 1 HDHD1P3       | K17623 |
| ENSG00000214252 | 5.13E-15 | -2.63127 | 1 | 1 AZGP1P2       | -      |
| ENSG00000214254 | 5.13E-15 | -2.63127 | 1 | 1 AC136896.2    | K17614 |
| ENSG00000214255 | 5.13E-15 | -2.63127 | 1 | 1 RPS2P6        | K02981 |
| ENSG00000214259 | 5.13E-15 | -2.63127 | 1 | 1 RP11-568J23.1 | K02865 |

|                 |          |          |   |                 |        |
|-----------------|----------|----------|---|-----------------|--------|
| ENSG00000214262 | 5.13E-15 | -2.63127 | 1 | 1 ANKRD36BP1    | K17299 |
| ENSG00000214263 | 5.13E-15 | -2.63127 | 1 | 1 RPSAP53       | K02998 |
| ENSG00000214265 | 5.13E-15 | -2.63127 | 1 | 1 SNURF         | K11100 |
| ENSG00000214266 | 5.13E-15 | -2.63127 | 1 | 1 STARP1        | K16931 |
| ENSG00000214268 | 5.13E-15 | -2.63127 | 1 | 1 RPS3AP33      | K02984 |
| ENSG00000214269 | 5.13E-15 | -2.63127 | 1 | 1 LGMNP1        | K01369 |
| ENSG00000214273 | 5.13E-15 | -2.63127 | 1 | 1 AGGF1P1       | -      |
| ENSG00000214280 | 5.13E-15 | -2.63127 | 1 | 1 RP11-553K23.2 | -      |
| ENSG00000214281 | 5.13E-15 | -2.63127 | 1 | 1 HMGN2P39      | K11300 |
| ENSG00000214282 | 5.13E-15 | -2.63127 | 1 | 1 KRT8P14       | K07605 |
| ENSG00000214283 | 5.13E-15 | -2.63127 | 1 | 1 RP11-85F14.1  | -      |
| ENSG00000214285 | 5.13E-15 | -2.63127 | 1 | 1 NPS           | -      |
| ENSG00000214286 | 5.13E-15 | -2.63127 | 1 | 1 PDCL3P3       | -      |
| ENSG00000214288 | 5.13E-15 | -2.63127 | 1 | 1 HMGB3P13      | K11296 |
| ENSG00000214290 | 5.13E-15 | -2.63127 | 1 | 1 COLCA2        | -      |
| ENSG00000214295 | 5.13E-15 | -2.63127 | 1 | 1 FOXO1B        | K07201 |
| ENSG00000214297 | 5.13E-15 | -2.63127 | 1 | 1 ALDOAP2       | K01623 |
| ENSG00000214298 | 5.13E-15 | -2.63127 | 1 | 1 MRPS21P6      | K02970 |
| ENSG00000214301 | 5.13E-15 | -2.63127 | 1 | 1 RP11-91K8.4   | -      |
| ENSG00000214305 | 5.13E-15 | -2.63127 | 1 | 1 AP001024.1    | K02927 |
| ENSG00000214306 | 5.13E-15 | -2.63127 | 1 | 1 AP001024.2    | K11447 |
| ENSG00000214313 | 5.13E-15 | -2.63127 | 1 | 1 AZGP1P1       | -      |
| ENSG00000214314 | 5.13E-15 | -2.63127 | 1 | 1 AC073063.1    | -      |
| ENSG00000214318 | 5.13E-15 | -2.63127 | 1 | 1 ATP5G1P6      | K02128 |
| ENSG00000214319 | 5.13E-15 | -2.63127 | 1 | 1 CXADRP1       | K06788 |
| ENSG00000214321 | 5.13E-15 | -2.63127 | 1 | 1 CBX1P4        | K11585 |
| ENSG00000214322 | 5.13E-15 | -2.63127 | 1 | 1 CBX1P2        | K11585 |
| ENSG00000214324 | 5.13E-15 | -2.63127 | 1 | 1 C3orf56       | -      |
| ENSG00000214325 | 5.13E-15 | -2.63127 | 1 | 1 AC025287.1    | -      |
| ENSG00000214326 | 5.13E-15 | -2.63127 | 1 | 1 RPL31P1       | K02910 |
| ENSG00000214329 | 5.13E-15 | -2.63127 | 1 | 1 SLC9B1P2      | -      |
| ENSG00000214330 | 5.13E-15 | -2.63127 | 1 | 1 ABCD1P5       | K05675 |
| ENSG00000214335 | 5.13E-15 | -2.63127 | 1 | 1 CTAGE16P      | -      |
| ENSG00000214336 | 5.13E-15 | -2.63127 | 1 | 1 FOXI3         | -      |
| ENSG00000214338 | 5.13E-15 | -2.63127 | 1 | 1 SOGA3         | -      |
| ENSG00000214342 | 5.13E-15 | -2.63127 | 1 | 1 ATP5F1P2      | K02127 |
| ENSG00000214344 | 5.13E-15 | -2.63127 | 1 | 1 OR4F13P       | K04257 |
| ENSG00000214347 | 5.13E-15 | -2.63127 | 1 | 1 CTB-180A7.8   | -      |
| ENSG00000214351 | 5.13E-15 | -2.63127 | 1 | 1 OR1X5P        | K04257 |
| ENSG00000214354 | 5.13E-15 | -2.63127 | 1 | 1 AC133644.3    | K16794 |
| ENSG00000214360 | 5.13E-15 | -2.63127 | 1 | 1 EFCAB9        | -      |
| ENSG00000214362 | 5.13E-15 | -2.63127 | 1 | 1 RP11-7D5.2    | K02984 |
| ENSG00000214366 | 5.13E-15 | -2.63127 | 1 | 1 RP11-138H14.1 | K03259 |
| ENSG00000214369 | 5.13E-15 | -2.63127 | 1 | 1 AC009967.3    | K18674 |
| ENSG00000214374 | 5.13E-15 | -2.63127 | 1 | 1 RPLP2P1       | K02943 |
| ENSG00000214376 | 5.13E-15 | -2.63127 | 1 | 1 VSTM5         | -      |
| ENSG00000214381 | 5.13E-15 | -2.63127 | 1 | 1 LINC00488     | -      |
| ENSG00000214397 | 5.13E-15 | -2.63127 | 1 | 1 DKFZP779J2370 | -      |
| ENSG00000214405 | 5.13E-15 | -2.63127 | 1 | 1 RP11-40M23.1  | K07836 |
| ENSG00000214407 | 5.13E-15 | -2.63127 | 1 | 1 RP11-221J22.1 | -      |
| ENSG00000214414 | 5.13E-15 | -2.63127 | 1 | 1 TRIM77        | K12019 |
| ENSG00000214415 | 5.13E-15 | -2.63127 | 1 | 1 GNAT3         | K04631 |
| ENSG00000214417 | 5.13E-15 | -2.63127 | 1 | 1 KRT18P13      | K07604 |
| ENSG00000214424 | 5.13E-15 | -2.63127 | 1 | 1 FAM149B1P1    | -      |
| ENSG00000214428 | 5.13E-15 | -2.63127 | 1 | 1 NPM1P10       | K11276 |
| ENSG00000214434 | 5.13E-15 | -2.63127 | 1 | 1 NIFKP1        | K14838 |
| ENSG00000214447 | 5.13E-15 | -2.63127 | 1 | 1 FAM187A       | -      |
| ENSG00000214457 | 5.13E-15 | -2.63127 | 1 | 1 RPL7P29       | K02937 |

|                 |          |          |   |                 |        |
|-----------------|----------|----------|---|-----------------|--------|
| ENSG00000214460 | 5.13E-15 | -2.63127 | 1 | 1 TPT1P6        | -      |
| ENSG00000214465 | 5.13E-15 | -2.63127 | 1 | 1 SMARCE1P6     | K11651 |
| ENSG00000214479 | 5.13E-15 | -2.63127 | 1 | 1 AL139333.1    | -      |
| ENSG00000214484 | 5.13E-15 | -2.63127 | 1 | 1 AC074008.1    | K02998 |
| ENSG00000214487 | 5.13E-15 | -2.63127 | 1 | 1 OR7E148P      | K04257 |
| ENSG00000214491 | 5.13E-15 | -2.63127 | 1 | 1 SEC14L6       | K17985 |
| ENSG00000214511 | 5.13E-15 | -2.63127 | 1 | 1 HIGD1C        | -      |
| ENSG00000214513 | 5.13E-15 | -2.63127 | 1 | 1 NOTO          | K17985 |
| ENSG00000214518 | 5.13E-15 | -2.63127 | 1 | 1 KRTAP2-2      | -      |
| ENSG00000214525 | 5.13E-15 | -2.63127 | 1 | 1 AC130709.1    | -      |
| ENSG00000214526 | 5.13E-15 | -2.63127 | 1 | 1 AP000343.1    | K02947 |
| ENSG00000214533 | 5.13E-15 | -2.63127 | 1 | 1 KRT18P33      | K07604 |
| ENSG00000214541 | 5.13E-15 | -2.63127 | 1 | 1 RPS4XP3       | K02987 |
| ENSG00000214549 | 5.13E-15 | -2.63127 | 1 | 1 SDHCP2        | K00236 |
| ENSG00000214553 | 5.13E-15 | -2.63127 | 1 | 1 LRRC37A11P    | K01185 |
| ENSG00000214556 | 5.13E-15 | -2.63127 | 1 | 1 C17orf98      | -      |
| ENSG00000214560 | 5.13E-15 | -2.63127 | 1 | 1 RPL21P41      | K02889 |
| ENSG00000214561 | 5.13E-15 | -2.63127 | 1 | 1 RBBP4P4       | K10752 |
| ENSG00000214563 | 5.13E-15 | -2.63127 | 1 | 1 GAPDHP15      | K00134 |
| ENSG00000214566 | 5.13E-15 | -2.63127 | 1 | 1 GAPDHP41      | K00134 |
| ENSG00000214578 | 5.13E-15 | -2.63127 | 1 | 1 HMG2P15       | K11300 |
| ENSG00000214581 | 5.13E-15 | -2.63127 | 1 | 1 RP11-80F22.10 | K09228 |
| ENSG00000214584 | 5.13E-15 | -2.63127 | 1 | 1 PGGT1BP2      | K11713 |
| ENSG00000214593 | 5.13E-15 | -2.63127 | 1 | 1 RP11-65N13.6  | K02947 |
| ENSG00000214602 | 5.13E-15 | -2.63127 | 1 | 1 CTBP2P5       | K04496 |
| ENSG00000214604 | 5.13E-15 | -2.63127 | 1 | 1 NPM1P36       | K11276 |
| ENSG00000214607 | 5.13E-15 | -2.63127 | 1 | 1 ADAM24P       | K08609 |
| ENSG00000214612 | 5.13E-15 | -2.63127 | 1 | 1 RPS19P1       | K02966 |
| ENSG00000214614 | 5.13E-15 | -2.63127 | 1 | 1 RP11-989E6.3  | -      |
| ENSG00000214617 | 5.13E-15 | -2.63127 | 1 | 1 SLC6A10P      | K05039 |
| ENSG00000214626 | 5.13E-15 | -2.63127 | 1 | 1 POLR3DP1      | K03026 |
| ENSG00000214628 | 5.13E-15 | -2.63127 | 1 | 1 RP11-392M9.2  | K03961 |
| ENSG00000214629 | 5.13E-15 | -2.63127 | 1 | 1 RPSAP6        | K02998 |
| ENSG00000214641 | 5.13E-15 | -2.63127 | 1 | 1 RP11-793K1.1  | K02957 |
| ENSG00000214642 | 5.13E-15 | -2.63127 | 1 | 1 DEFB113       | -      |
| ENSG00000214643 | 5.13E-15 | -2.63127 | 1 | 1 DEFB133       | -      |
| ENSG00000214645 | 5.13E-15 | -2.63127 | 1 | 1 AL162389.1    | -      |
| ENSG00000214646 | 5.13E-15 | -2.63127 | 1 | 1 RP11-114H24.4 | -      |
| ENSG00000214651 | 5.13E-15 | -2.63127 | 1 | 1 RP11-477J21.2 | K02147 |
| ENSG00000214652 | 5.13E-15 | -2.63127 | 1 | 1 RP11-3N2.13   | K09228 |
| ENSG00000214657 | 5.13E-15 | -2.63127 | 1 | 1 RP11-120J4.1  | K02942 |
| ENSG00000214660 | 5.13E-15 | -2.63127 | 1 | 1 SLC29A4P2     | K03323 |
| ENSG00000214668 | 5.13E-15 | -2.63127 | 1 | 1 SLC29A4P1     | K03323 |
| ENSG00000214669 | 5.13E-15 | -2.63127 | 1 | 1 RP11-18B16.1  | -      |
| ENSG00000214670 | 5.13E-15 | -2.63127 | 1 | 1 AC007956.1    | K12479 |
| ENSG00000214671 | 5.13E-15 | -2.63127 | 1 | 1 RPL6P12       | K02934 |
| ENSG00000214676 | 5.13E-15 | -2.63127 | 1 | 1 RPL9P16       | K02940 |
| ENSG00000214681 | 5.13E-15 | -2.63127 | 1 | 1 IQCF5         | -      |
| ENSG00000214684 | 5.13E-15 | -2.63127 | 1 | 1 AC003045.1    | -      |
| ENSG00000214686 | 5.13E-15 | -2.63127 | 1 | 1 IQCF6         | -      |
| ENSG00000214696 | 5.13E-15 | -2.63127 | 1 | 1 AC007347.1    | K17985 |
| ENSG00000214702 | 5.13E-15 | -2.63127 | 1 | 1 RP11-247C2.1  | -      |
| ENSG00000214711 | 5.13E-15 | -2.63127 | 1 | 1 CAPN14        | K13442 |
| ENSG00000214720 | 5.13E-15 | -2.63127 | 1 | 1 KRT18P49      | K07604 |
| ENSG00000214727 | 5.13E-15 | -2.63127 | 1 | 1 RPL5P35       | K02932 |
| ENSG00000214732 | 5.13E-15 | -2.63127 | 1 | 1 RP1-139D8.6   | -      |
| ENSG00000214736 | 5.13E-15 | -2.63127 | 1 | 1 TOMM6         | K17772 |
| ENSG00000214743 | 5.13E-15 | -2.63127 | 1 | 1 MRPS5P3       | K02988 |

|                 |          |          |   |                   |        |
|-----------------|----------|----------|---|-------------------|--------|
| ENSG00000214745 | 5.13E-15 | -2.63127 | 1 | 1 RP11-54I5.1     | K14455 |
| ENSG00000214748 | 5.13E-15 | -2.63127 | 1 | 1 RP11-332E4.1    | K02903 |
| ENSG00000214754 | 5.13E-15 | -2.63127 | 1 | 1 AC004870.5      | K12891 |
| ENSG00000214759 | 5.13E-15 | -2.63127 | 1 | 1 CTD-2509G16.1   | K02929 |
| ENSG00000214760 | 5.13E-15 | -2.63127 | 1 | 1 RPL21P1         | K02889 |
| ENSG00000214761 | 5.13E-15 | -2.63127 | 1 | 1 HNRNPA1P15      | K12741 |
| ENSG00000214773 | 5.13E-15 | -2.63127 | 1 | 1 RP11-717D12.1   | _      |
| ENSG00000214782 | 5.13E-15 | -2.63127 | 1 | 1 MS4A18          | _      |
| ENSG00000214787 | 5.13E-15 | -2.63127 | 1 | 1 MS4A4E          | K12900 |
| ENSG00000214788 | 5.13E-15 | -2.63127 | 1 | 1 OOSP1           | _      |
| ENSG00000214794 | 5.13E-15 | -2.63127 | 1 | 1 KRT18P42        | K07604 |
| ENSG00000214797 | 5.13E-15 | -2.63127 | 1 | 1 RP11-1036E20.9  | _      |
| ENSG00000214803 | 5.13E-15 | -2.63127 | 1 | 1 RP11-37N22.1    | _      |
| ENSG00000214807 | 5.13E-15 | -2.63127 | 1 | 1 NPM1P31         | K11276 |
| ENSG00000214812 | 5.13E-15 | -2.63127 | 1 | 1 RP5-1053E7.3    | K07955 |
| ENSG00000214814 | 5.13E-15 | -2.63127 | 1 | 1 FER1L6          | _      |
| ENSG00000214815 | 5.13E-15 | -2.63127 | 1 | 1 AC008265.2      | K00088 |
| ENSG00000214819 | 5.13E-15 | -2.63127 | 1 | 1 CDRT15L2        | _      |
| ENSG00000214820 | 5.13E-15 | -2.63127 | 1 | 1 MPRIPP1         | _      |
| ENSG00000214821 | 5.13E-15 | -2.63127 | 1 | 1 HMGB1P4         | K10802 |
| ENSG00000214823 | 5.13E-15 | -2.63127 | 1 | 1 NXT1P1          | K14285 |
| ENSG00000214825 | 5.13E-15 | -2.63127 | 1 | 1 EI24P3          | K10134 |
| ENSG00000214827 | 5.13E-15 | -2.63127 | 1 | 1 MTCP1           | K16837 |
| ENSG00000214835 | 5.13E-15 | -2.63127 | 1 | 1 RPL23AP6        | K02893 |
| ENSG00000214837 | 5.13E-15 | -2.63127 | 1 | 1 RP11-261C10.3   | _      |
| ENSG00000214841 | 5.13E-15 | -2.63127 | 1 | 1 AC005493.1      | _      |
| ENSG00000214842 | 5.13E-15 | -2.63127 | 1 | 1 RAD51AP2        | _      |
| ENSG00000214843 | 5.13E-15 | -2.63127 | 1 | 1 ZFYVE9P2        | K04679 |
| ENSG00000214844 | 5.13E-15 | -2.63127 | 1 | 1 AC007952.1      | K04364 |
| ENSG00000214846 | 5.13E-15 | -2.63127 | 1 | 1 RP11-115L11.1   | K02865 |
| ENSG00000214853 | 5.13E-15 | -2.63127 | 1 | 1 RP11-509M23.1   | K03767 |
| ENSG00000214854 | 5.13E-15 | -2.63127 | 1 | 1 AL031590.1      | _      |
| ENSG00000214855 | 5.13E-15 | -2.63127 | 1 | 1 APOC1P1         | _      |
| ENSG00000214857 | 5.13E-15 | -2.63127 | 1 | 1 SHFM1P1         | K10881 |
| ENSG00000214866 | 5.13E-15 | -2.63127 | 1 | 1 DCDC2C          | _      |
| ENSG00000214867 | 5.13E-15 | -2.63127 | 1 | 1 SRSF9P1         | K12890 |
| ENSG00000214869 | 5.13E-15 | -2.63127 | 1 | 1 TPM3P4          | K09290 |
| ENSG00000214870 | 5.13E-15 | -2.63127 | 1 | 1 AC004540.5      | _      |
| ENSG00000214872 | 5.13E-15 | -2.63127 | 1 | 1 SMTNL1          | _      |
| ENSG00000214878 | 5.13E-15 | -2.63127 | 1 | 1 RPL5P31         | K02932 |
| ENSG00000214880 | 5.13E-15 | -2.63127 | 1 | 1 OR7E5P          | K04257 |
| ENSG00000214881 | 5.13E-15 | -2.63127 | 1 | 1 TMEM14D         | _      |
| ENSG00000214883 | 5.13E-15 | -2.63127 | 1 | 1 RP11-574M7.2    | K13184 |
| ENSG00000214888 | 5.13E-15 | -2.63127 | 1 | 1 XXyac-YM21GA2.7 | _      |
| ENSG00000214889 | 5.13E-15 | -2.63127 | 1 | 1 RPS9P1          | K02997 |
| ENSG00000214890 | 5.13E-15 | -2.63127 | 1 | 1 CTD-2299I21.1   | _      |
| ENSG00000214891 | 5.13E-15 | -2.63127 | 1 | 1 TRIM64C         | K12019 |
| ENSG00000214892 | 5.13E-15 | -2.63127 | 1 | 1 USP8P1          | K11839 |
| ENSG00000214894 | 5.13E-15 | -2.63127 | 1 | 1 LINC00243       | _      |
| ENSG00000214896 | 5.13E-15 | -2.63127 | 1 | 1 RPSAP55         | K02998 |
| ENSG00000214897 | 5.13E-15 | -2.63127 | 1 | 1 U82695.5        | _      |
| ENSG00000214903 | 5.13E-15 | -2.63127 | 1 | 1 RPS15AP3        | K02957 |
| ENSG00000214904 | 5.13E-15 | -2.63127 | 1 | 1 DUTP8           | K01520 |
| ENSG00000214908 | 5.13E-15 | -2.63127 | 1 | 1 RP11-229M1.2    | K02991 |
| ENSG00000214914 | 5.13E-15 | -2.63127 | 1 | 1 RPL23AP3        | K02893 |
| ENSG00000214915 | 5.13E-15 | -2.63127 | 1 | 1 XX-FW80269A6.1  | _      |
| ENSG00000214917 | 5.13E-15 | -2.63127 | 1 | 1 RP11-53I6.1     | K02957 |
| ENSG00000214919 | 5.13E-15 | -2.63127 | 1 | 1 AC104472.1      | K12581 |

|                 |          |          |   |                  |        |
|-----------------|----------|----------|---|------------------|--------|
| ENSG00000214921 | 5.13E-15 | -2.63127 | 1 | 1 AC003102.1     | K01557 |
| ENSG00000214922 | 5.13E-15 | -2.63127 | 1 | 1 HLA-F-AS1      | -      |
| ENSG00000214925 | 5.13E-15 | -2.63127 | 1 | 1 RP3-507I15.1   | K02929 |
| ENSG00000214929 | 5.13E-15 | -2.63127 | 1 | 1 SPATA31D1      | -      |
| ENSG00000214930 | 5.13E-15 | -2.63127 | 1 | 1 KRT8P6         | K07605 |
| ENSG00000214942 | 5.13E-15 | -2.63127 | 1 | 1 AC113167.1     | -      |
| ENSG00000214943 | 5.13E-15 | -2.63127 | 1 | 1 GPR33          | K08382 |
| ENSG00000214955 | 5.13E-15 | -2.63127 | 1 | 1 AP000318.2     | -      |
| ENSG00000214960 | 5.13E-15 | -2.63127 | 1 | 1 ISPD           | K09276 |
| ENSG00000214961 | 5.13E-15 | -2.63127 | 1 | 1 RP11-355K23B.1 | -      |
| ENSG00000214970 | 5.13E-15 | -2.63127 | 1 | 1 CTC-297N7.7    | -      |
| ENSG00000214976 | 5.13E-15 | -2.63127 | 1 | 1 VDAC2P1        | K15040 |
| ENSG00000214980 | 5.13E-15 | -2.63127 | 1 | 1 RP11-274J2.1   | K19486 |
| ENSG00000214985 | 5.13E-15 | -2.63127 | 1 | 1 AL591516.5     | K17985 |
| ENSG00000214986 | 5.13E-15 | -2.63127 | 1 | 1 FAM25D         | -      |
| ENSG00000214988 | 5.13E-15 | -2.63127 | 1 | 1 RPL7AP26       | K02936 |
| ENSG00000214992 | 5.13E-15 | -2.63127 | 1 | 1 AKAP17BP       | K13169 |
| ENSG00000215000 | 5.13E-15 | -2.63127 | 1 | 1 RP1-31B8.1     | -      |
| ENSG00000215002 | 5.13E-15 | -2.63127 | 1 | 1 RP11-446H13.2  | K02893 |
| ENSG00000215003 | 5.13E-15 | -2.63127 | 1 | 1 RPL15P20       | K02877 |
| ENSG00000215004 | 5.13E-15 | -2.63127 | 1 | 1 MESTP4         | -      |
| ENSG00000215005 | 5.13E-15 | -2.63127 | 1 | 1 HSPD1P7        | K04077 |
| ENSG00000215006 | 5.13E-15 | -2.63127 | 1 | 1 CHCHD2P2       | K00901 |
| ENSG00000215007 | 5.13E-15 | -2.63127 | 1 | 1 DNAJA1P3       | K09502 |
| ENSG00000215016 | 5.13E-15 | -2.63127 | 1 | 1 RPL24P7        | K02896 |
| ENSG00000215020 | 5.13E-15 | -2.63127 | 1 | 1 AL591684.1     | -      |
| ENSG00000215024 | 5.13E-15 | -2.63127 | 1 | 1 DUSP8P2        | K04459 |
| ENSG00000215029 | 5.13E-15 | -2.63127 | 1 | 1 TCP11X2        | K14284 |
| ENSG00000215034 | 5.13E-15 | -2.63127 | 1 | 1 DSTNP4         | K10363 |
| ENSG00000215035 | 5.13E-15 | -2.63127 | 1 | 1 FDPSP5         | K00787 |
| ENSG00000215037 | 5.13E-15 | -2.63127 | 1 | 1 VENTXP2        | -      |
| ENSG00000215043 | 5.13E-15 | -2.63127 | 1 | 1 GLULP6         | K01915 |
| ENSG00000215044 | 5.13E-15 | -2.63127 | 1 | 1 AHCYP1         | K01251 |
| ENSG00000215046 | 5.13E-15 | -2.63127 | 1 | 1 TCP11X1        | -      |
| ENSG00000215049 | 5.13E-15 | -2.63127 | 1 | 1 PRDX2P1        | K03386 |
| ENSG00000215054 | 5.13E-15 | -2.63127 | 1 | 1 HNRNPCP10      | K12884 |
| ENSG00000215057 | 5.13E-15 | -2.63127 | 1 | 1 PKMP5          | K00873 |
| ENSG00000215063 | 5.13E-15 | -2.63127 | 1 | 1 RPL21P2        | K02889 |
| ENSG00000215066 | 5.13E-15 | -2.63127 | 1 | 1 C9orf38        | K02927 |
| ENSG00000215070 | 5.13E-15 | -2.63127 | 1 | 1 XRCC6P5        | K10884 |
| ENSG00000215085 | 5.13E-15 | -2.63127 | 1 | 1 RP11-471G13.2  | K15203 |
| ENSG00000215088 | 5.13E-15 | -2.63127 | 1 | 1 RPS5P3         | K02989 |
| ENSG00000215089 | 5.13E-15 | -2.63127 | 1 | 1 KRT18P11       | K07604 |
| ENSG00000215093 | 5.13E-15 | -2.63127 | 1 | 1 EEF1A1P29      | K03231 |
| ENSG00000215094 | 5.13E-15 | -2.63127 | 1 | 1 RP11-244K5.7   | -      |
| ENSG00000215096 | 5.13E-15 | -2.63127 | 1 | 1 IFITM8P        | K06566 |
| ENSG00000215097 | 5.13E-15 | -2.63127 | 1 | 1 DUSP8P3        | K04459 |
| ENSG00000215104 | 5.13E-15 | -2.63127 | 1 | 1 CHMP1B2P       | K12197 |
| ENSG00000215110 | 5.13E-15 | -2.63127 | 1 | 1 RP11-790I12.1  | K00699 |
| ENSG00000215112 | 5.13E-15 | -2.63127 | 1 | 1 FAM74A5        | -      |
| ENSG00000215113 | 5.13E-15 | -2.63127 | 1 | 1 CXorf49B       | -      |
| ENSG00000215115 | 5.13E-15 | -2.63127 | 1 | 1 CXorf49        | -      |
| ENSG00000215117 | 5.13E-15 | -2.63127 | 1 | 1 LINC00588      | -      |
| ENSG00000215120 | 5.13E-15 | -2.63127 | 1 | 1 AL590763.5     | K04699 |
| ENSG00000215124 | 5.13E-15 | -2.63127 | 1 | 1 RP3-420J14.1   | K01611 |
| ENSG00000215127 | 5.13E-15 | -2.63127 | 1 | 1 SYT14L         | K19328 |
| ENSG00000215131 | 5.13E-15 | -2.63127 | 1 | 1 C16orf90       | -      |
| ENSG00000215142 | 5.13E-15 | -2.63127 | 1 | 1 RP11-292B8.1   | -      |



|                 |          |          |   |                 |        |
|-----------------|----------|----------|---|-----------------|--------|
| ENSG00000215148 | 5.13E-15 | -2.63127 | 1 | 1 PRSS41        | K09625 |
| ENSG00000215149 | 5.13E-15 | -2.63127 | 1 | 1 KRT18P32      | K07604 |
| ENSG00000215151 | 5.13E-15 | -2.63127 | 1 | 1 ABCD1P2       | K05675 |
| ENSG00000215159 | 5.13E-15 | -2.63127 | 1 | 1 RP11-629N8.3  | -      |
| ENSG00000215160 | 5.13E-15 | -2.63127 | 1 | 1 OR7E122P      | K04257 |
| ENSG00000215162 | 5.13E-15 | -2.63127 | 1 | 1 LINC00269     | -      |
| ENSG00000215165 | 5.13E-15 | -2.63127 | 1 | 1 RP11-403F21.3 | K03145 |
| ENSG00000215168 | 5.13E-15 | -2.63127 | 1 | 1 RP11-30M20.1  | K11363 |
| ENSG00000215174 | 5.13E-15 | -2.63127 | 1 | 1 RP13-487C10.1 | K19409 |
| ENSG00000215177 | 5.13E-15 | -2.63127 | 1 | 1 IGLV8OR8-1    | -      |
| ENSG00000215179 | 5.13E-15 | -2.63127 | 1 | 1 MAPK6PS4      | K06855 |
| ENSG00000215182 | 5.13E-15 | -2.63127 | 1 | 1 MUC5AC        | K13908 |
| ENSG00000215183 | 5.13E-15 | -2.63127 | 1 | 1 MSMP          | -      |
| ENSG00000215184 | 5.13E-15 | -2.63127 | 1 | 1 RP11-8L18.2   | K02951 |
| ENSG00000215186 | 5.13E-15 | -2.63127 | 1 | 1 GOLGA6B       | -      |
| ENSG00000215197 | 5.13E-15 | -2.63127 | 1 | 1 PGAM4P1       | K01834 |
| ENSG00000215198 | 5.13E-15 | -2.63127 | 1 | 1 RP11-182N22.7 | K09228 |
| ENSG00000215203 | 5.13E-15 | -2.63127 | 1 | 1 GRXCR1        | K17479 |
| ENSG00000215206 | 5.13E-15 | -2.63127 | 1 | 1 TRBV24OR9-2   | K10785 |
| ENSG00000215208 | 5.13E-15 | -2.63127 | 1 | 1 KRT18P60      | K07604 |
| ENSG00000215217 | 5.13E-15 | -2.63127 | 1 | 1 C5orf49       | -      |
| ENSG00000215218 | 5.13E-15 | -2.63127 | 1 | 1 UBE2QL1       | K10582 |
| ENSG00000215223 | 5.13E-15 | -2.63127 | 1 | 1 CYP51A1P3     | K05917 |
| ENSG00000215227 | 5.13E-15 | -2.63127 | 1 | 1 RP11-308K19.2 | -      |
| ENSG00000215231 | 5.13E-15 | -2.63127 | 1 | 1 LINC01020     | -      |
| ENSG00000215236 | 5.13E-15 | -2.63127 | 1 | 1 RPL7P33       | K02937 |
| ENSG00000215237 | 5.13E-15 | -2.63127 | 1 | 1 RP11-54D18.2  | -      |
| ENSG00000215262 | 5.13E-15 | -2.63127 | 1 | 1 KCNU1         | K05274 |
| ENSG00000215263 | 5.13E-15 | -2.63127 | 1 | 1 AC025750.7    | K02889 |
| ENSG00000215264 | 5.13E-15 | -2.63127 | 1 | 1 RP1-84O15.1   | K02865 |
| ENSG00000215267 | 5.13E-15 | -2.63127 | 1 | 1 AKR1C7P       | K00089 |
| ENSG00000215268 | 5.13E-15 | -2.63127 | 1 | 1 LA16c-60G3.8  | K11841 |
| ENSG00000215269 | 5.13E-15 | -2.63127 | 1 | 1 GAGE12G       | -      |
| ENSG00000215274 | 5.13E-15 | -2.63127 | 1 | 1 GAGE10        | -      |
| ENSG00000215277 | 5.13E-15 | -2.63127 | 1 | 1 C14orf164     | -      |
| ENSG00000215278 | 5.13E-15 | -2.63127 | 1 | 1 RPS7P6        | K02993 |
| ENSG00000215286 | 5.13E-15 | -2.63127 | 1 | 1 RP5-1158E12.2 | K12893 |
| ENSG00000215288 | 5.13E-15 | -2.63127 | 1 | 1 RP11-613H2.1  | -      |
| ENSG00000215296 | 5.13E-15 | -2.63127 | 1 | 1 TMC05B        | -      |
| ENSG00000215297 | 5.13E-15 | -2.63127 | 1 | 1 RP11-62E14.2  | K02937 |
| ENSG00000215298 | 5.13E-15 | -2.63127 | 1 | 1 FP15737       | K04613 |
| ENSG00000215304 | 5.13E-15 | -2.63127 | 1 | 1 RP13-395E19.3 | -      |
| ENSG00000215306 | 5.13E-15 | -2.63127 | 1 | 1 AL135998.1    | -      |
| ENSG00000215307 | 5.13E-15 | -2.63127 | 1 | 1 RBBP4P3       | K10752 |
| ENSG00000215310 | 5.13E-15 | -2.63127 | 1 | 1 RP6-60B16.1   | -      |
| ENSG00000215311 | 5.13E-15 | -2.63127 | 1 | 1 NPM1P12       | K11276 |
| ENSG00000215313 | 5.13E-15 | -2.63127 | 1 | 1 RPL6P30       | K02934 |
| ENSG00000215317 | 5.13E-15 | -2.63127 | 1 | 1 THUMPD1P1     | K06963 |
| ENSG00000215319 | 5.13E-15 | -2.63127 | 1 | 1 RP11-98L4.1   | K03262 |
| ENSG00000215323 | 5.13E-15 | -2.63127 | 1 | 1 OR7E84P       | K04257 |
| ENSG00000215325 | 5.13E-15 | -2.63127 | 1 | 1 ASS1P10       | K01940 |
| ENSG00000215326 | 5.13E-15 | -2.63127 | 1 | 1 GPX1P2        | K00432 |
| ENSG00000215333 | 5.13E-15 | -2.63127 | 1 | 1 KRT18P23      | K07604 |
| ENSG00000215339 | 5.13E-15 | -2.63127 | 1 | 1 ZNF705C       | K09228 |
| ENSG00000215343 | 5.13E-15 | -2.63127 | 1 | 1 ZNF705D       | K09228 |
| ENSG00000215346 | 5.13E-15 | -2.63127 | 1 | 1 AF131215.5    | -      |
| ENSG00000215351 | 5.13E-15 | -2.63127 | 1 | 1 PPIAP1        | K03767 |
| ENSG00000215353 | 5.13E-15 | -2.63127 | 1 | 1 C1QBPP        | K15414 |

|                 |          |          |   |                   |        |
|-----------------|----------|----------|---|-------------------|--------|
| ENSG00000215354 | 5.13E-15 | -2.63127 | 1 | 1 FAM90A24P       | -      |
| ENSG00000215356 | 5.13E-15 | -2.63127 | 1 | 1 ZNF705B         | K09228 |
| ENSG00000215357 | 5.13E-15 | -2.63127 | 1 | 1 HSPD1P8         | K04077 |
| ENSG00000215365 | 5.13E-15 | -2.63127 | 1 | 1 FAM90A22P       | -      |
| ENSG00000215367 | 5.13E-15 | -2.63127 | 1 | 1 TMED11P         | -      |
| ENSG00000215368 | 5.13E-15 | -2.63127 | 1 | 1 RP11-190I17.4   | -      |
| ENSG00000215369 | 5.13E-15 | -2.63127 | 1 | 1 RPL37P3         | -      |
| ENSG00000215371 | 5.13E-15 | -2.63127 | 1 | 1 DEFB108P2       | -      |
| ENSG00000215372 | 5.13E-15 | -2.63127 | 1 | 1 ZNF705G         | K09228 |
| ENSG00000215373 | 5.13E-15 | -2.63127 | 1 | 1 FAM90A5P        | -      |
| ENSG00000215374 | 5.13E-15 | -2.63127 | 1 | 1 FAM66B          | -      |
| ENSG00000215378 | 5.13E-15 | -2.63127 | 1 | 1 DEFT1P          | K05230 |
| ENSG00000215380 | 5.13E-15 | -2.63127 | 1 | 1 AC090625.1      | K09228 |
| ENSG00000215381 | 5.13E-15 | -2.63127 | 1 | 1 RP5-1057J7.1    | K02905 |
| ENSG00000215388 | 5.13E-15 | -2.63127 | 1 | 1 ACTG1P3         | K05692 |
| ENSG00000215397 | 5.13E-15 | -2.63127 | 1 | 1 SCRT2           | K09219 |
| ENSG00000215398 | 5.13E-15 | -2.63127 | 1 | 1 RP11-754I20.1   | K17299 |
| ENSG00000215399 | 5.13E-15 | -2.63127 | 1 | 1 HMGB3P7         | K11296 |
| ENSG00000215403 | 5.13E-15 | -2.63127 | 1 | 1 LL22NC01-81G9.3 | -      |
| ENSG00000215405 | 5.13E-15 | -2.63127 | 1 | 1 GOLGA6L6        | K09488 |
| ENSG00000215409 | 5.13E-15 | -2.63127 | 1 | 1 RP11-748L13.2   | K17299 |
| ENSG00000215418 | 5.13E-15 | -2.63127 | 1 | 1 PEX12P1         | K13345 |
| ENSG00000215428 | 5.13E-15 | -2.63127 | 1 | 1 AL354898.1      | K17341 |
| ENSG00000215430 | 5.13E-15 | -2.63127 | 1 | 1 OR7E156P        | K04257 |
| ENSG00000215431 | 5.13E-15 | -2.63127 | 1 | 1 AC015989.1      | -      |
| ENSG00000215432 | 5.13E-15 | -2.63127 | 1 | 1 OR7E104P        | K04257 |
| ENSG00000215441 | 5.13E-15 | -2.63127 | 1 | 1 CTAGE12P        | -      |
| ENSG00000215444 | 5.13E-15 | -2.63127 | 1 | 1 RP5-827A12.2    | K02905 |
| ENSG00000215448 | 5.13E-15 | -2.63127 | 1 | 1 SRMP1           | K00797 |
| ENSG00000215450 | 5.13E-15 | -2.63127 | 1 | 1 RP5-890O15.3    | K02981 |
| ENSG00000215452 | 5.13E-15 | -2.63127 | 1 | 1 ZNF663P         | K09228 |
| ENSG00000215454 | 5.13E-15 | -2.63127 | 1 | 1 KRTAP10-4       | -      |
| ENSG00000215455 | 5.13E-15 | -2.63127 | 1 | 1 KRTAP10-1       | -      |
| ENSG00000215457 | 5.13E-15 | -2.63127 | 1 | 1 RPS8P3          | K02995 |
| ENSG00000215462 | 5.13E-15 | -2.63127 | 1 | 1 AL136218.1      | -      |
| ENSG00000215464 | 5.13E-15 | -2.63127 | 1 | 1 AP000354.2      | K02947 |
| ENSG00000215467 | 5.13E-15 | -2.63127 | 1 | 1 RPL27AP         | K02900 |
| ENSG00000215474 | 5.13E-15 | -2.63127 | 1 | 1 SKOR2           | -      |
| ENSG00000215475 | 5.13E-15 | -2.63127 | 1 | 1 SIAH3           | K05255 |
| ENSG00000215477 | 5.13E-15 | -2.63127 | 1 | 1 RCN1P1          | -      |
| ENSG00000215478 | 5.13E-15 | -2.63127 | 1 | 1 CES5AP1         | K15743 |
| ENSG00000215480 | 5.13E-15 | -2.63127 | 1 | 1 OR7E37P         | K04257 |
| ENSG00000215486 | 5.13E-15 | -2.63127 | 1 | 1 ARL2BPP3        | K16742 |
| ENSG00000215504 | 5.13E-15 | -2.63127 | 1 | 1 AP000974.1      | -      |
| ENSG00000215506 | 5.13E-15 | -2.63127 | 1 | 1 TPTE2P4         | K18079 |
| ENSG00000215507 | 5.13E-15 | -2.63127 | 1 | 1 RBMY2DP         | K12885 |
| ENSG00000215512 | 5.13E-15 | -2.63127 | 1 | 1 AP005901.1      | K17299 |
| ENSG00000215520 | 5.13E-15 | -2.63127 | 1 | 1 RPS4XP4         | K02987 |
| ENSG00000215537 | 5.13E-15 | -2.63127 | 1 | 1 ZNF736P11Y      | K09228 |
| ENSG00000215540 | 5.13E-15 | -2.63127 | 1 | 1 AC009947.3      | K12885 |
| ENSG00000215544 | 5.13E-15 | -2.63127 | 1 | 1 BCRP7           | K08878 |
| ENSG00000215545 | 5.13E-15 | -2.63127 | 1 | 1 DEFB116         | -      |
| ENSG00000215546 | 5.13E-15 | -2.63127 | 1 | 1 DKKL1P1         | -      |
| ENSG00000215547 | 5.13E-15 | -2.63127 | 1 | 1 DEFB115         | -      |
| ENSG00000215549 | 5.13E-15 | -2.63127 | 1 | 1 AL138815.1      | -      |
| ENSG00000215553 | 5.13E-15 | -2.63127 | 1 | 1 KRT18P3         | K07604 |
| ENSG00000215559 | 5.13E-15 | -2.63127 | 1 | 1 ANKRD20A11P     | K17299 |
| ENSG00000215560 | 5.13E-15 | -2.63127 | 1 | 1 TTTY5           | -      |

|                 |          |          |   |                 |        |
|-----------------|----------|----------|---|-----------------|--------|
| ENSG00000215562 | 5.13E-15 | -2.63127 | 1 | 1 CNN2P7        | K15411 |
| ENSG00000215565 | 5.13E-15 | -2.63127 | 1 | 1 AP003041.1    | K12581 |
| ENSG00000215567 | 5.13E-15 | -2.63127 | 1 | 1 RP11-79C23.1  | K17299 |
| ENSG00000215568 | 5.13E-15 | -2.63127 | 1 | 1 GAB4          | K08091 |
| ENSG00000215571 | 5.13E-15 | -2.63127 | 1 | 1 GRK6P1        | K08291 |
| ENSG00000215572 | 5.13E-15 | -2.63127 | 1 | 1 ESRRAP1       | K08552 |
| ENSG00000215580 | 5.13E-15 | -2.63127 | 1 | 1 BCORP1        | K11504 |
| ENSG00000215583 | 5.13E-15 | -2.63127 | 1 | 1 ASS1P6        | K01940 |
| ENSG00000215586 | 5.13E-15 | -2.63127 | 1 | 1 RP5-836E8.1   | K12900 |
| ENSG00000215589 | 5.13E-15 | -2.63127 | 1 | 1 RP5-967N21.2  | -      |
| ENSG00000215595 | 5.13E-15 | -2.63127 | 1 | 1 C20orf202     | -      |
| ENSG00000215601 | 5.13E-15 | -2.63127 | 1 | 1 TSPY24P       | -      |
| ENSG00000215603 | 5.13E-15 | -2.63127 | 1 | 1 ZNF92P1Y      | K09228 |
| ENSG00000215604 | 5.13E-15 | -2.63127 | 1 | 1 ZNF962P       | K09228 |
| ENSG00000215606 | 5.13E-15 | -2.63127 | 1 | 1 KRT18P35      | K07604 |
| ENSG00000215612 | 5.13E-15 | -2.63127 | 1 | 1 HMX1          | K09349 |
| ENSG00000215621 | 5.13E-15 | -2.63127 | 1 | 1 AC174470.1    | -      |
| ENSG00000215692 | 5.13E-15 | -2.63127 | 1 | 1 AC114730.8    | -      |
| ENSG00000215695 | 5.13E-15 | -2.63127 | 1 | 1 RSC1A1        | K11885 |
| ENSG00000215720 | 5.13E-15 | -2.63127 | 1 | 1 RP1-21O18.3   | -      |
| ENSG00000215734 | 5.13E-15 | -2.63127 | 1 | 1 MRPL20P1      | K02887 |
| ENSG00000215760 | 5.13E-15 | -2.63127 | 1 | 1 TAF9BP2       | -      |
| ENSG00000215765 | 5.13E-15 | -2.63127 | 1 | 1 CTB-61M7.1    | -      |
| ENSG00000215771 | 5.13E-15 | -2.63127 | 1 | 1 LRRC37A14P    | -      |
| ENSG00000215785 | 5.13E-15 | -2.63127 | 1 | 1 CFL1P6        | K05765 |
| ENSG00000215791 | 5.13E-15 | -2.63127 | 1 | 1 AL645728.2    | K12581 |
| ENSG00000215796 | 5.13E-15 | -2.63127 | 1 | 1 RP11-551G24.2 | K02684 |
| ENSG00000215800 | 5.13E-15 | -2.63127 | 1 | 1 RSL24D1P4     | K02896 |
| ENSG00000215802 | 5.13E-15 | -2.63127 | 1 | 1 RFKP1         | K00861 |
| ENSG00000215805 | 5.13E-15 | -2.63127 | 1 | 1 RP11-438O11.1 | K01641 |
| ENSG00000215807 | 5.13E-15 | -2.63127 | 1 | 1 KRT18P65      | K07604 |
| ENSG00000215812 | 5.13E-15 | -2.63127 | 1 | 1 ZNF847P       | K09228 |
| ENSG00000215819 | 5.13E-15 | -2.63127 | 1 | 1 KRT18P12      | K07604 |
| ENSG00000215833 | 5.13E-15 | -2.63127 | 1 | 1 QRSL1P1       | K02433 |
| ENSG00000215834 | 5.13E-15 | -2.63127 | 1 | 1 FMO9P         | K00485 |
| ENSG00000215837 | 5.13E-15 | -2.63127 | 1 | 1 SDHAP2        | K00234 |
| ENSG00000215846 | 5.13E-15 | -2.63127 | 1 | 1 MPTX1         | -      |
| ENSG00000215853 | 5.13E-15 | -2.63127 | 1 | 1 RPTN          | K18626 |
| ENSG00000215859 | 5.13E-15 | -2.63127 | 1 | 1 RP6-74O6.2    | -      |
| ENSG00000215860 | 5.13E-15 | -2.63127 | 1 | 1 PDZK1P1       | -      |
| ENSG00000215861 | 5.13E-15 | -2.63127 | 1 | 1 WI2-1896O14.1 | K16549 |
| ENSG00000215864 | 5.13E-15 | -2.63127 | 1 | 1 NBPF7         | -      |
| ENSG00000215867 | 5.13E-15 | -2.63127 | 1 | 1 KRT18P57      | K07604 |
| ENSG00000215869 | 5.13E-15 | -2.63127 | 1 | 1 RP11-364B6.1  | -      |
| ENSG00000215871 | 5.13E-15 | -2.63127 | 1 | 1 RP5-837M10.1  | -      |
| ENSG00000215873 | 5.13E-15 | -2.63127 | 1 | 1 FEN1P1        | K04799 |
| ENSG00000215874 | 5.13E-15 | -2.63127 | 1 | 1 CAPNS1P1      | K08583 |
| ENSG00000215875 | 5.13E-15 | -2.63127 | 1 | 1 ST13P20       | K09560 |
| ENSG00000215878 | 5.13E-15 | -2.63127 | 1 | 1 MARCKSL1P2    | K13536 |
| ENSG00000215881 | 5.13E-15 | -2.63127 | 1 | 1 RP11-65D24.1  | -      |
| ENSG00000215887 | 5.13E-15 | -2.63127 | 1 | 1 ZNF859P       | K09228 |
| ENSG00000215893 | 5.13E-15 | -2.63127 | 1 | 1 RP4-635E8.1   | K02893 |
| ENSG00000215895 | 5.13E-15 | -2.63127 | 1 | 1 RP11-334L9.1  | K09490 |
| ENSG00000215899 | 5.13E-15 | -2.63127 | 1 | 1 RP11-439L8.2  | K03231 |
| ENSG00000215900 | 5.13E-15 | -2.63127 | 1 | 1 SEPW1P        | -      |
| ENSG00000215905 | 5.13E-15 | -2.63127 | 1 | 1 RP11-4M23.7   | K02920 |
| ENSG00000215906 | 5.13E-15 | -2.63127 | 1 | 1 LACTBL1       | -      |
| ENSG00000215909 | 5.13E-15 | -2.63127 | 1 | 1 RP4-597A16.3  | K11798 |

|                 |          |          |   |              |    |
|-----------------|----------|----------|---|--------------|----|
| ENSG00000215921 | 5.13E-15 | -2.63127 | 1 | 1 AL731568.1 | -- |
| ENSG00000215922 | 5.13E-15 | -2.63127 | 1 | 1 AC092965.1 | -- |
| ENSG00000215923 | 5.13E-15 | -2.63127 | 1 | 1 AC007528.1 | -- |
| ENSG00000215924 | 5.13E-15 | -2.63127 | 1 | 1 BX284613.1 | -- |
| ENSG00000215925 | 5.13E-15 | -2.63127 | 1 | 1 AL157788.1 | -- |
| ENSG00000215930 | 5.13E-15 | -2.63127 | 1 | 1 MIR942     | -- |
| ENSG00000215933 | 5.13E-15 | -2.63127 | 1 | 1 BX119917.1 | -- |
| ENSG00000215934 | 5.13E-15 | -2.63127 | 1 | 1 AC013731.1 | -- |
| ENSG00000215938 | 5.13E-15 | -2.63127 | 1 | 1 MIR190B    | -- |
| ENSG00000215939 | 5.13E-15 | -2.63127 | 1 | 1 MIR873     | -- |
| ENSG00000215941 | 5.13E-15 | -2.63127 | 1 | 1 AC116038.1 | -- |
| ENSG00000215942 | 5.13E-15 | -2.63127 | 1 | 1 AP000866.1 | -- |
| ENSG00000215943 | 5.13E-15 | -2.63127 | 1 | 1 MIR892A    | -- |
| ENSG00000215945 | 5.13E-15 | -2.63127 | 1 | 1 AC021613.1 | -- |
| ENSG00000215946 | 5.13E-15 | -2.63127 | 1 | 1 MIR941-1   | -- |
| ENSG00000215948 | 5.13E-15 | -2.63127 | 1 | 1 AC055873.1 | -- |
| ENSG00000215952 | 5.13E-15 | -2.63127 | 1 | 1 MIR921     | -- |
| ENSG00000215953 | 5.13E-15 | -2.63127 | 1 | 1 AC026700.1 | -- |
| ENSG00000215954 | 5.13E-15 | -2.63127 | 1 | 1 AP002884.1 | -- |
| ENSG00000215957 | 5.13E-15 | -2.63127 | 1 | 1 MIR300     | -- |
| ENSG00000215958 | 5.13E-15 | -2.63127 | 1 | 1 AC021818.1 | -- |
| ENSG00000215960 | 5.13E-15 | -2.63127 | 1 | 1 AC068292.1 | -- |
| ENSG00000215961 | 5.13E-15 | -2.63127 | 1 | 1 MIR297     | -- |
| ENSG00000215964 | 5.13E-15 | -2.63127 | 1 | 1 AC055813.1 | -- |
| ENSG00000215966 | 5.13E-15 | -2.63127 | 1 | 1 MIR876     | -- |
| ENSG00000215968 | 5.13E-15 | -2.63127 | 1 | 1 AC007560.2 | -- |
| ENSG00000215972 | 5.13E-15 | -2.63127 | 1 | 1 AL360176.1 | -- |
| ENSG00000215976 | 5.13E-15 | -2.63127 | 1 | 1 AC078819.1 | -- |
| ENSG00000215977 | 5.13E-15 | -2.63127 | 1 | 1 AC130365.1 | -- |
| ENSG00000215979 | 5.13E-15 | -2.63127 | 1 | 1 AL021917.1 | -- |
| ENSG00000215983 | 5.13E-15 | -2.63127 | 1 | 1 AC092756.1 | -- |
| ENSG00000215984 | 5.13E-15 | -2.63127 | 1 | 1 AC110769.1 | -- |
| ENSG00000215991 | 5.13E-15 | -2.63127 | 1 | 1 MIR208B    | -- |
| ENSG00000215993 | 5.13E-15 | -2.63127 | 1 | 1 AC079603.1 | -- |
| ENSG00000215996 | 5.13E-15 | -2.63127 | 1 | 1 AC017084.1 | -- |
| ENSG00000215998 | 5.13E-15 | -2.63127 | 1 | 1 MIR935     | -- |
| ENSG00000215999 | 5.13E-15 | -2.63127 | 1 | 1 AC004052.1 | -- |
| ENSG00000216001 | 5.13E-15 | -2.63127 | 1 | 1 MIR450B    | -- |
| ENSG00000216002 | 5.13E-15 | -2.63127 | 1 | 1 AC092576.1 | -- |
| ENSG00000216004 | 5.13E-15 | -2.63127 | 1 | 1 AL359832.1 | -- |
| ENSG00000216005 | 5.13E-15 | -2.63127 | 1 | 1 MIR888     | -- |
| ENSG00000216009 | 5.13E-15 | -2.63127 | 1 | 1 MIR874     | -- |
| ENSG00000216011 | 5.13E-15 | -2.63127 | 1 | 1 AC007682.2 | -- |
| ENSG00000216014 | 5.13E-15 | -2.63127 | 1 | 1 AL512505.1 | -- |
| ENSG00000216015 | 5.13E-15 | -2.63127 | 1 | 1 AL354936.1 | -- |
| ENSG00000216017 | 5.13E-15 | -2.63127 | 1 | 1 AL139429.1 | -- |
| ENSG00000216020 | 5.13E-15 | -2.63127 | 1 | 1 AC026320.1 | -- |
| ENSG00000216022 | 5.13E-15 | -2.63127 | 1 | 1 AC068062.1 | -- |
| ENSG00000216027 | 5.13E-15 | -2.63127 | 1 | 1 AC095061.1 | -- |
| ENSG00000216032 | 5.13E-15 | -2.63127 | 1 | 1 AL445258.1 | -- |
| ENSG00000216035 | 5.13E-15 | -2.63127 | 1 | 1 MIR938     | -- |
| ENSG00000216037 | 5.13E-15 | -2.63127 | 1 | 1 AL356479.1 | -- |
| ENSG00000216042 | 5.13E-15 | -2.63127 | 1 | 1 MIR922     | -- |
| ENSG00000216045 | 5.13E-15 | -2.63127 | 1 | 1 AL356693.1 | -- |
| ENSG00000216047 | 5.13E-15 | -2.63127 | 1 | 1 AL135784.1 | -- |
| ENSG00000216054 | 5.13E-15 | -2.63127 | 1 | 1 AC019201.1 | -- |
| ENSG00000216055 | 5.13E-15 | -2.63127 | 1 | 1 AC097372.1 | -- |
| ENSG00000216056 | 5.13E-15 | -2.63127 | 1 | 1 MIR891A    | -- |

|                 |          |          |   |              |    |
|-----------------|----------|----------|---|--------------|----|
| ENSG00000216058 | 5.13E-15 | -2.63127 | 1 | 1 MIR944     | -- |
| ENSG00000216060 | 5.13E-15 | -2.63127 | 1 | 1 MIR934     | -- |
| ENSG00000216064 | 5.13E-15 | -2.63127 | 1 | 1 MIR891B    | -- |
| ENSG00000216067 | 5.13E-15 | -2.63127 | 1 | 1 AC104457.1 | -- |
| ENSG00000216069 | 5.13E-15 | -2.63127 | 1 | 1 MIR875     | -- |
| ENSG00000216070 | 5.13E-15 | -2.63127 | 1 | 1 AL158155.1 | -- |
| ENSG00000216072 | 5.13E-15 | -2.63127 | 1 | 1 AL589736.1 | -- |
| ENSG00000216073 | 5.13E-15 | -2.63127 | 1 | 1 AP003730.1 | -- |
| ENSG00000216075 | 5.13E-15 | -2.63127 | 1 | 1 MIR890     | -- |
| ENSG00000216076 | 5.13E-15 | -2.63127 | 1 | 1 AC002066.2 | -- |
| ENSG00000216077 | 5.13E-15 | -2.63127 | 1 | 1 MIR887     | -- |
| ENSG00000216081 | 5.13E-15 | -2.63127 | 1 | 1 AC010146.2 | -- |
| ENSG00000216083 | 5.13E-15 | -2.63127 | 1 | 1 MIR936     | -- |
| ENSG00000216084 | 5.13E-15 | -2.63127 | 1 | 1 AC131213.1 | -- |
| ENSG00000216085 | 5.13E-15 | -2.63127 | 1 | 1 AC005048.1 | -- |
| ENSG00000216088 | 5.13E-15 | -2.63127 | 1 | 1 AL157830.1 | -- |
| ENSG00000216089 | 5.13E-15 | -2.63127 | 1 | 1 AC105316.1 | -- |
| ENSG00000216090 | 5.13E-15 | -2.63127 | 1 | 1 MIR937     | -- |
| ENSG00000216093 | 5.13E-15 | -2.63127 | 1 | 1 AC009305.2 | -- |
| ENSG00000216097 | 5.13E-15 | -2.63127 | 1 | 1 AL357060.1 | -- |
| ENSG00000216098 | 5.13E-15 | -2.63127 | 1 | 1 MIR892B    | -- |
| ENSG00000216099 | 5.13E-15 | -2.63127 | 1 | 1 MIR889     | -- |
| ENSG00000216100 | 5.13E-15 | -2.63127 | 1 | 1 AC138710.1 | -- |
| ENSG00000216101 | 5.13E-15 | -2.63127 | 1 | 1 MIR877     | -- |
| ENSG00000216102 | 5.13E-15 | -2.63127 | 1 | 1 AC008752.1 | -- |
| ENSG00000216105 | 5.13E-15 | -2.63127 | 1 | 1 MIR943     | -- |
| ENSG00000216109 | 5.13E-15 | -2.63127 | 1 | 1 AL713999.1 | -- |
| ENSG00000216112 | 5.13E-15 | -2.63127 | 1 | 1 AC092675.1 | -- |
| ENSG00000216113 | 5.13E-15 | -2.63127 | 1 | 1 AP001572.1 | -- |
| ENSG00000216114 | 5.13E-15 | -2.63127 | 1 | 1 AL033403.1 | -- |
| ENSG00000216116 | 5.13E-15 | -2.63127 | 1 | 1 AC117479.1 | -- |
| ENSG00000216123 | 5.13E-15 | -2.63127 | 1 | 1 AC012119.1 | -- |
| ENSG00000216125 | 5.13E-15 | -2.63127 | 1 | 1 AC109496.1 | -- |
| ENSG00000216127 | 5.13E-15 | -2.63127 | 1 | 1 AC011407.1 | -- |
| ENSG00000216131 | 5.13E-15 | -2.63127 | 1 | 1 AC025284.1 | -- |
| ENSG00000216133 | 5.13E-15 | -2.63127 | 1 | 1 MIR939     | -- |
| ENSG00000216135 | 5.13E-15 | -2.63127 | 1 | 1 MIR885     | -- |
| ENSG00000216136 | 5.13E-15 | -2.63127 | 1 | 1 AC108697.1 | -- |
| ENSG00000216154 | 5.13E-15 | -2.63127 | 1 | 1 AC109357.1 | -- |
| ENSG00000216157 | 5.13E-15 | -2.63127 | 1 | 1 AL611946.1 | -- |
| ENSG00000216162 | 5.13E-15 | -2.63127 | 1 | 1 AL121988.1 | -- |
| ENSG00000216166 | 5.13E-15 | -2.63127 | 1 | 1 AC131160.1 | -- |
| ENSG00000216168 | 5.13E-15 | -2.63127 | 1 | 1 AC100832.1 | -- |
| ENSG00000216169 | 5.13E-15 | -2.63127 | 1 | 1 AC098650.1 | -- |
| ENSG00000216171 | 5.13E-15 | -2.63127 | 1 | 1 MIR513C    | -- |
| ENSG00000216173 | 5.13E-15 | -2.63127 | 1 | 1 AL132819.1 | -- |
| ENSG00000216179 | 5.13E-15 | -2.63127 | 1 | 1 MIR541     | -- |
| ENSG00000216181 | 5.13E-15 | -2.63127 | 1 | 1 AL391056.1 | -- |
| ENSG00000216182 | 5.13E-15 | -2.63127 | 1 | 1 AL137024.1 | -- |
| ENSG00000216184 | 5.13E-15 | -2.63127 | 1 | 1 AC048346.1 | -- |
| ENSG00000216191 | 5.13E-15 | -2.63127 | 1 | 1 AC009234.2 | -- |
| ENSG00000216192 | 5.13E-15 | -2.63127 | 1 | 1 MIR920     | -- |
| ENSG00000216194 | 5.13E-15 | -2.63127 | 1 | 1 AC130360.1 | -- |
| ENSG00000216195 | 5.13E-15 | -2.63127 | 1 | 1 MIR941-3   | -- |
| ENSG00000216197 | 5.13E-15 | -2.63127 | 1 | 1 AP001623.1 | -- |
| ENSG00000216204 | 5.13E-15 | -2.63127 | 1 | 1 AC018607.1 | -- |
| ENSG00000216205 | 5.13E-15 | -2.63127 | 1 | 1 AC036178.1 | -- |
| ENSG00000216206 | 5.13E-15 | -2.63127 | 1 | 1 AF228730.1 | -- |

|                 |          |          |   |                 |        |
|-----------------|----------|----------|---|-----------------|--------|
| ENSG00000216265 | 5.13E-15 | -2.63127 | 1 | 1 FABP12P1      | -      |
| ENSG00000216306 | 5.13E-15 | -2.63127 | 1 | 1 KRT19P2       | K07604 |
| ENSG00000216307 | 5.13E-15 | -2.63127 | 1 | 1 RP3-400B16.2  | -      |
| ENSG00000216316 | 5.13E-15 | -2.63127 | 1 | 1 RP3-354N19.3  | K02872 |
| ENSG00000216324 | 5.13E-15 | -2.63127 | 1 | 1 RP3-382I10.2  | K03127 |
| ENSG00000216347 | 5.13E-15 | -2.63127 | 1 | 1 RP3-334F4.2   | K02866 |
| ENSG00000216352 | 5.13E-15 | -2.63127 | 1 | 1 RP11-486E2.1  | K01647 |
| ENSG00000216360 | 5.13E-15 | -2.63127 | 1 | 1 RP1-182O16.2  | K00134 |
| ENSG00000216364 | 5.13E-15 | -2.63127 | 1 | 1 MRPL42P2      | K17423 |
| ENSG00000216365 | 5.13E-15 | -2.63127 | 1 | 1 RPL37P15      | K02922 |
| ENSG00000216368 | 5.13E-15 | -2.63127 | 1 | 1 RP3-486D24.1  | K02936 |
| ENSG00000216378 | 5.13E-15 | -2.63127 | 1 | 1 RP3-344J20.1  | K01476 |
| ENSG00000216425 | 5.13E-15 | -2.63127 | 1 | 1 AC004066.2    | -      |
| ENSG00000216436 | 5.13E-15 | -2.63127 | 1 | 1 HIST1H2APS1   | K11251 |
| ENSG00000216439 | 5.13E-15 | -2.63127 | 1 | 1 DUTP5         | K01520 |
| ENSG00000216444 | 5.13E-15 | -2.63127 | 1 | 1 RAET1M        | K07986 |
| ENSG00000216471 | 5.13E-15 | -2.63127 | 1 | 1 RPSAP43       | K02998 |
| ENSG00000216480 | 5.13E-15 | -2.63127 | 1 | 1 RP3-393E18.1  | K02889 |
| ENSG00000216516 | 5.13E-15 | -2.63127 | 1 | 1 RP11-317M22.1 | -      |
| ENSG00000216518 | 5.13E-15 | -2.63127 | 1 | 1 EEF1GP6       | -      |
| ENSG00000216519 | 5.13E-15 | -2.63127 | 1 | 1 RP3-406A7.1   | K03231 |
| ENSG00000216522 | 5.13E-15 | -2.63127 | 1 | 1 AC011718.1    | K18592 |
| ENSG00000216523 | 5.13E-15 | -2.63127 | 1 | 1 RP3-435K13.1  | -      |
| ENSG00000216548 | 5.13E-15 | -2.63127 | 1 | 1 RP11-471B18.1 | K02964 |
| ENSG00000216560 | 5.13E-15 | -2.63127 | 1 | 1 LINC00955     | -      |
| ENSG00000216616 | 5.13E-15 | -2.63127 | 1 | 1 RP11-550C4.4  | K02900 |
| ENSG00000216621 | 5.13E-15 | -2.63127 | 1 | 1 RP11-244K5.6  | -      |
| ENSG00000216629 | 5.13E-15 | -2.63127 | 1 | 1 OR2W4P        | K04257 |
| ENSG00000216639 | 5.13E-15 | -2.63127 | 1 | 1 RP3-355L5.3   | -      |
| ENSG00000216642 | 5.13E-15 | -2.63127 | 1 | 1 RP1-95L4.3    | K02910 |
| ENSG00000216649 | 5.13E-15 | -2.63127 | 1 | 1 GAGE12E       | -      |
| ENSG00000216663 | 5.13E-15 | -2.63127 | 1 | 1 RP11-506B6.5  | K11135 |
| ENSG00000216671 | 5.13E-15 | -2.63127 | 1 | 1 CCNYL3        | K18468 |
| ENSG00000216676 | 5.13E-15 | -2.63127 | 1 | 1 RP1-15D7.1    | K02938 |
| ENSG00000216687 | 5.13E-15 | -2.63127 | 1 | 1 RP11-278J20.2 | -      |
| ENSG00000216708 | 5.13E-15 | -2.63127 | 1 | 1 CIR1P3        | K06066 |
| ENSG00000216710 | 5.13E-15 | -2.63127 | 1 | 1 COX6A1P3      | K02266 |
| ENSG00000216713 | 5.13E-15 | -2.63127 | 1 | 1 MTND4P13      | K03881 |
| ENSG00000216718 | 5.13E-15 | -2.63127 | 1 | 1 RP3-522P13.1  | K02889 |
| ENSG00000216721 | 5.13E-15 | -2.63127 | 1 | 1 AC093850.1    | K03948 |
| ENSG00000216723 | 5.13E-15 | -2.63127 | 1 | 1 NUDT19P3      | K13355 |
| ENSG00000216740 | 5.13E-15 | -2.63127 | 1 | 1 ANXA2P3       | K17092 |
| ENSG00000216753 | 5.13E-15 | -2.63127 | 1 | 1 HMGA1P7       | K09282 |
| ENSG00000216754 | 5.13E-15 | -2.63127 | 1 | 1 RP1-190J20.2  | -      |
| ENSG00000216762 | 5.13E-15 | -2.63127 | 1 | 1 VN1R13P       | K04614 |
| ENSG00000216777 | 5.13E-15 | -2.63127 | 1 | 1 PRRC2CP1      | -      |
| ENSG00000216781 | 5.13E-15 | -2.63127 | 1 | 1 RP1-290I10.2  | -      |
| ENSG00000216802 | 5.13E-15 | -2.63127 | 1 | 1 RP11-390P2.2  | K17885 |
| ENSG00000216809 | 5.13E-15 | -2.63127 | 1 | 1 RP11-57K17.1  | K14805 |
| ENSG00000216811 | 5.13E-15 | -2.63127 | 1 | 1 RP1-69B13.2   | -      |
| ENSG00000216813 | 5.13E-15 | -2.63127 | 1 | 1 RP11-812I20.2 | K02951 |
| ENSG00000216817 | 5.13E-15 | -2.63127 | 1 | 1 R3HDM2P2      | -      |
| ENSG00000216819 | 5.13E-15 | -2.63127 | 1 | 1 TUBB2BP1      | K07375 |
| ENSG00000216824 | 5.13E-15 | -2.63127 | 1 | 1 ZNF736P10Y    | K09228 |
| ENSG00000216829 | 5.13E-15 | -2.63127 | 1 | 1 BX005214.1    | K04358 |
| ENSG00000216835 | 5.13E-15 | -2.63127 | 1 | 1 RBMXP1        | K12885 |
| ENSG00000216844 | 5.13E-15 | -2.63127 | 1 | 1 AC009494.3    | -      |
| ENSG00000216853 | 5.13E-15 | -2.63127 | 1 | 1 RP3-399J4.1   | -      |

|                 |          |          |   |                   |        |
|-----------------|----------|----------|---|-------------------|--------|
| ENSG00000216854 | 5.13E-15 | -2.63127 | 1 | 1 RPL17P26        | K02880 |
| ENSG00000216859 | 5.13E-15 | -2.63127 | 1 | 1 RP11-448N11.1   | K00287 |
| ENSG00000216902 | 5.13E-15 | -2.63127 | 1 | 1 RP1-161C16.1    | K02910 |
| ENSG00000216904 | 5.13E-15 | -2.63127 | 1 | 1 SOCS5P5         | K04698 |
| ENSG00000216913 | 5.13E-15 | -2.63127 | 1 | 1 RP4-753D5.3     | K15436 |
| ENSG00000216915 | 5.13E-15 | -2.63127 | 1 | 1 RP1-97D16.1     | -      |
| ENSG00000216917 | 5.13E-15 | -2.63127 | 1 | 1 RP5-988G15.1    | K02877 |
| ENSG00000216938 | 5.13E-15 | -2.63127 | 1 | 1 RPL7P58         | K02937 |
| ENSG00000216966 | 5.13E-15 | -2.63127 | 1 | 1 RP11-568A7.1    | -      |
| ENSG00000216977 | 5.13E-15 | -2.63127 | 1 | 1 RPL21P65        | K02889 |
| ENSG00000216990 | 5.13E-15 | -2.63127 | 1 | 1 HSPD1P10        | K04077 |
| ENSG00000216998 | 5.13E-15 | -2.63127 | 1 | 1 CYP2AC1P        | K17854 |
| ENSG00000217004 | 5.13E-15 | -2.63127 | 1 | 1 RP3-329A5.1     | -      |
| ENSG00000217026 | 5.13E-15 | -2.63127 | 1 | 1 RPL10P1         | K02866 |
| ENSG00000217030 | 5.13E-15 | -2.63127 | 1 | 1 RP11-428J1.2    | K02964 |
| ENSG00000217041 | 5.13E-15 | -2.63127 | 1 | 1 RP11-346C16.1   | K02969 |
| ENSG00000217044 | 5.13E-15 | -2.63127 | 1 | 1 RP11-331O9.4    | -      |
| ENSG00000217060 | 5.13E-15 | -2.63127 | 1 | 1 RP11-30P6.1     | -      |
| ENSG00000217067 | 5.13E-15 | -2.63127 | 1 | 1 RP11-448N11.2   | K02962 |
| ENSG00000217083 | 5.13E-15 | -2.63127 | 1 | 1 RP1-245M18.2    | -      |
| ENSG00000217085 | 5.13E-15 | -2.63127 | 1 | 1 HMGB3P19        | K11296 |
| ENSG00000217089 | 5.13E-15 | -2.63127 | 1 | 1 RPS29P13        | K02980 |
| ENSG00000217120 | 5.13E-15 | -2.63127 | 1 | 1 RP1-76C18.1     | -      |
| ENSG00000217135 | 5.13E-15 | -2.63127 | 1 | 1 RP1-140K8.3     | -      |
| ENSG00000217139 | 5.13E-15 | -2.63127 | 1 | 1 RP11-129H15.4   | K18749 |
| ENSG00000217159 | 5.13E-15 | -2.63127 | 1 | 1 LARP1P1         | -      |
| ENSG00000217160 | 5.13E-15 | -2.63127 | 1 | 1 RP11-331O9.1    | -      |
| ENSG00000217169 | 5.13E-15 | -2.63127 | 1 | 1 MTHFD2P2        | -      |
| ENSG00000217178 | 5.13E-15 | -2.63127 | 1 | 1 RP11-9G10.1     | -      |
| ENSG00000217179 | 5.13E-15 | -2.63127 | 1 | 1 MTCYBP2         | -      |
| ENSG00000217227 | 5.13E-15 | -2.63127 | 1 | 1 RP1-319M7.2     | K09292 |
| ENSG00000217228 | 5.13E-15 | -2.63127 | 1 | 1 RP1-152L7.1     | K00799 |
| ENSG00000217231 | 5.13E-15 | -2.63127 | 1 | 1 RP3-340H11.2    | K09573 |
| ENSG00000217239 | 5.13E-15 | -2.63127 | 1 | 1 RP1-182O16.1    | K02915 |
| ENSG00000217261 | 5.13E-15 | -2.63127 | 1 | 1 POM121L4P       | -      |
| ENSG00000217268 | 5.13E-15 | -2.63127 | 1 | 1 TXNP7           | K03671 |
| ENSG00000217272 | 5.13E-15 | -2.63127 | 1 | 1 RP1-263J7.2     | K07874 |
| ENSG00000217314 | 5.13E-15 | -2.63127 | 1 | 1 UQCRFS1P3       | K00411 |
| ENSG00000217315 | 5.13E-15 | -2.63127 | 1 | 1 OR2W2P          | K04257 |
| ENSG00000217327 | 5.13E-15 | -2.63127 | 1 | 1 RPS7P5          | K02993 |
| ENSG00000217330 | 5.13E-15 | -2.63127 | 1 | 1 SSXP10          | K15624 |
| ENSG00000217331 | 5.13E-15 | -2.63127 | 1 | 1 RP11-304C16.3   | -      |
| ENSG00000217334 | 5.13E-15 | -2.63127 | 1 | 1 RP11-33E24.3    | K04079 |
| ENSG00000217377 | 5.13E-15 | -2.63127 | 1 | 1 AK4P5           | K00939 |
| ENSG00000217379 | 5.13E-15 | -2.63127 | 1 | 1 RP11-254A17.1   | K02889 |
| ENSG00000217385 | 5.13E-15 | -2.63127 | 1 | 1 PSMC1P11        | K03062 |
| ENSG00000217404 | 5.13E-15 | -2.63127 | 1 | 1 RPS4XP9         | K02987 |
| ENSG00000217408 | 5.13E-15 | -2.63127 | 1 | 1 PRELID1P2       | -      |
| ENSG00000217414 | 5.13E-15 | -2.63127 | 1 | 1 RP11-528A10.2   | K13179 |
| ENSG00000217447 | 5.13E-15 | -2.63127 | 1 | 1 RP3-366N23.4    | K02537 |
| ENSG00000217455 | 5.13E-15 | -2.63127 | 1 | 1 AC091801.1      | -      |
| ENSG00000217477 | 5.13E-15 | -2.63127 | 1 | 1 RP11-184C23.1   | K07605 |
| ENSG00000217482 | 5.13E-15 | -2.63127 | 1 | 1 HMGB1P17        | K15413 |
| ENSG00000217483 | 5.13E-15 | -2.63127 | 1 | 1 RP11-135M8__A.1 | -      |
| ENSG00000217488 | 5.13E-15 | -2.63127 | 1 | 1 RP11-474L11.5   | -      |
| ENSG00000217495 | 5.13E-15 | -2.63127 | 1 | 1 RP1-95L4.2      | -      |
| ENSG00000217512 | 5.13E-15 | -2.63127 | 1 | 1 RP11-477E3.2    | K14312 |
| ENSG00000217514 | 5.13E-15 | -2.63127 | 1 | 1 RP3-495O10.1    | -      |

|                 |          |          |   |                 |        |
|-----------------|----------|----------|---|-----------------|--------|
| ENSG00000217539 | 5.13E-15 | -2.63127 | 1 | 1 IQCB2P        | K16774 |
| ENSG00000217557 | 5.13E-15 | -2.63127 | 1 | 1 RP11-157L10.1 | K02915 |
| ENSG00000217566 | 5.13E-15 | -2.63127 | 1 | 1 TDGF1P4       | -      |
| ENSG00000217576 | 5.13E-15 | -2.63127 | 1 | 1 RP11-248G5.8  | -      |
| ENSG00000217585 | 5.13E-15 | -2.63127 | 1 | 1 RP1-13D10.5   | K00025 |
| ENSG00000217612 | 5.13E-15 | -2.63127 | 1 | 1 RP1-28C20.1   | -      |
| ENSG00000217631 | 5.13E-15 | -2.63127 | 1 | 1 RP1-142O9.2   | -      |
| ENSG00000217643 | 5.13E-15 | -2.63127 | 1 | 1 PTGES3P2      | K15730 |
| ENSG00000217646 | 5.13E-15 | -2.63127 | 1 | 1 HIST1H2BPS2   | K11252 |
| ENSG00000217653 | 5.13E-15 | -2.63127 | 1 | 1 RP11-63K6.1   | -      |
| ENSG00000217680 | 5.13E-15 | -2.63127 | 1 | 1 RP11-415D17.1 | K10704 |
| ENSG00000217686 | 5.13E-15 | -2.63127 | 1 | 1 NUS1P4        | K19177 |
| ENSG00000217702 | 5.13E-15 | -2.63127 | 1 | 1 MGC10955      | -      |
| ENSG00000217707 | 5.13E-15 | -2.63127 | 1 | 1 SERPINB8P1    | K13963 |
| ENSG00000217718 | 5.13E-15 | -2.63127 | 1 | 1 AC064847.4    | K03960 |
| ENSG00000217767 | 5.13E-15 | -2.63127 | 1 | 1 RP11-160A9.2  | -      |
| ENSG00000217770 | 5.13E-15 | -2.63127 | 1 | 1 FEM1AP3       | -      |
| ENSG00000217776 | 5.13E-15 | -2.63127 | 1 | 1 RP11-156F23.2 | K02889 |
| ENSG00000217783 | 5.13E-15 | -2.63127 | 1 | 1 LDHAL6FP      | K00016 |
| ENSG00000217786 | 5.13E-15 | -2.63127 | 1 | 1 RP3-508D13.1  | K09512 |
| ENSG00000217791 | 5.13E-15 | -2.63127 | 1 | 1 ASS1P9        | K01940 |
| ENSG00000217805 | 5.13E-15 | -2.63127 | 1 | 1 RP11-191A15.2 | -      |
| ENSG00000217809 | 5.13E-15 | -2.63127 | 1 | 1 FAT1P1        | K16506 |
| ENSG00000217811 | 5.13E-15 | -2.63127 | 1 | 1 HNRNPDP2      | K19601 |
| ENSG00000217824 | 5.13E-15 | -2.63127 | 1 | 1 SNRPEP6       | K11097 |
| ENSG00000217825 | 5.13E-15 | -2.63127 | 1 | 1 AC099552.4    | -      |
| ENSG00000217835 | 5.13E-15 | -2.63127 | 1 | 1 RP6-159A1.2   | K12885 |
| ENSG00000217878 | 5.13E-15 | -2.63127 | 1 | 1 RP11-534P19.1 | K09230 |
| ENSG00000217889 | 5.13E-15 | -2.63127 | 1 | 1 KRT18P48      | K07604 |
| ENSG00000217896 | 5.13E-15 | -2.63127 | 1 | 1 ZNF839P1      | -      |
| ENSG00000217897 | 5.13E-15 | -2.63127 | 1 | 1 HSPE1P8       | K04078 |
| ENSG00000217929 | 5.13E-15 | -2.63127 | 1 | 1 CICP18        | K16941 |
| ENSG00000218014 | 5.13E-15 | -2.63127 | 1 | 1 KRT19P1       | K07604 |
| ENSG00000218016 | 5.13E-15 | -2.63127 | 1 | 1 ZNF192P2      | K09228 |
| ENSG00000218020 | 5.13E-15 | -2.63127 | 1 | 1 PRKRIRP5      | -      |
| ENSG00000218029 | 5.13E-15 | -2.63127 | 1 | 1 RP1-232L24.2  | K11300 |
| ENSG00000218049 | 5.13E-15 | -2.63127 | 1 | 1 RPL31P33      | K02910 |
| ENSG00000218089 | 5.13E-15 | -2.63127 | 1 | 1 DNAJA1P4      | K09502 |
| ENSG00000218107 | 5.13E-15 | -2.63127 | 1 | 1 RP1-261G23.4  | K12586 |
| ENSG00000218109 | 5.13E-15 | -2.63127 | 1 | 1 KIRREL3-AS3   | -      |
| ENSG00000218125 | 5.13E-15 | -2.63127 | 1 | 1 AP000567.27   | -      |
| ENSG00000218143 | 5.13E-15 | -2.63127 | 1 | 1 ERHP2         | -      |
| ENSG00000218153 | 5.13E-15 | -2.63127 | 1 | 1 KRT18P22      | K07604 |
| ENSG00000218173 | 5.13E-15 | -2.63127 | 1 | 1 RP11-427E4.1  | -      |
| ENSG00000218180 | 5.13E-15 | -2.63127 | 1 | 1 SLC25A5P7     | K05863 |
| ENSG00000218186 | 5.13E-15 | -2.63127 | 1 | 1 KRT8P43       | K07605 |
| ENSG00000218187 | 5.13E-15 | -2.63127 | 1 | 1 RP11-325O24.1 | -      |
| ENSG00000218189 | 5.13E-15 | -2.63127 | 1 | 1 POM121L14P    | -      |
| ENSG00000218194 | 5.13E-15 | -2.63127 | 1 | 1 HLFPI         | -      |
| ENSG00000218198 | 5.13E-15 | -2.63127 | 1 | 1 RPS20P32      | K02969 |
| ENSG00000218208 | 5.13E-15 | -2.63127 | 1 | 1 RP11-367G18.2 | K02977 |
| ENSG00000218213 | 5.13E-15 | -2.63127 | 1 | 1 FTH1P26       | -      |
| ENSG00000218233 | 5.13E-15 | -2.63127 | 1 | 1 NEPNP         | -      |
| ENSG00000218261 | 5.13E-15 | -2.63127 | 1 | 1 RP11-96J19.1  | K10740 |
| ENSG00000218265 | 5.13E-15 | -2.63127 | 1 | 1 RPS4XP7       | K02987 |
| ENSG00000218281 | 5.13E-15 | -2.63127 | 1 | 1 HIST1H2APS3   | -      |
| ENSG00000218300 | 5.13E-15 | -2.63127 | 1 | 1 RP11-63K6.4   | K02891 |
| ENSG00000218313 | 5.13E-15 | -2.63127 | 1 | 1 RP11-393I2.2  | K03004 |



|                 |          |          |   |                    |        |
|-----------------|----------|----------|---|--------------------|--------|
| ENSG00000218337 | 5.13E-15 | -2.63127 | 1 | 1 RP4-724P12.1     | K18084 |
| ENSG00000218346 | 5.13E-15 | -2.63127 | 1 | 1 VN1R14P          | -      |
| ENSG00000218347 | 5.13E-15 | -2.63127 | 1 | 1 HNRNPA1P1        | K12741 |
| ENSG00000218351 | 5.13E-15 | -2.63127 | 1 | 1 RPS3AP23         | -      |
| ENSG00000218357 | 5.13E-15 | -2.63127 | 1 | 1 LL22NC03-75H12.2 | -      |
| ENSG00000218359 | 5.13E-15 | -2.63127 | 1 | 1 SUMO2P13         | K12160 |
| ENSG00000218363 | 5.13E-15 | -2.63127 | 1 | 1 SLC25A20P1       | K15109 |
| ENSG00000218410 | 5.13E-15 | -2.63127 | 1 | 1 AC012078.2       | -      |
| ENSG00000218424 | 5.13E-15 | -2.63127 | 1 | 1 NDUFS5P1         | -      |
| ENSG00000218428 | 5.13E-15 | -2.63127 | 1 | 1 NIP7P3           | K07565 |
| ENSG00000218454 | 5.13E-15 | -2.63127 | 1 | 1 HNRNPA1P19       | K12741 |
| ENSG00000218459 | 5.13E-15 | -2.63127 | 1 | 1 RPS27P15         | K02978 |
| ENSG00000218472 | 5.13E-15 | -2.63127 | 1 | 1 RP1-140K8.2      | K02975 |
| ENSG00000218475 | 5.13E-15 | -2.63127 | 1 | 1 RP11-93K7.1      | K05692 |
| ENSG00000218476 | 5.13E-15 | -2.63127 | 1 | 1 RP11-108N13.1    | K02934 |
| ENSG00000218483 | 5.13E-15 | -2.63127 | 1 | 1 RP11-554D15.2    | K00415 |
| ENSG00000218490 | 5.13E-15 | -2.63127 | 1 | 1 FCF1P10          | K14566 |
| ENSG00000218499 | 5.13E-15 | -2.63127 | 1 | 1 RP3-422G23.3     | -      |
| ENSG00000218502 | 5.13E-15 | -2.63127 | 1 | 1 H2AFZP3          | K11251 |
| ENSG00000218512 | 5.13E-15 | -2.63127 | 1 | 1 SPTLC1P2         | K00654 |
| ENSG00000218521 | 5.13E-15 | -2.63127 | 1 | 1 RP11-420A21.1    | K06524 |
| ENSG00000218536 | 5.13E-15 | -2.63127 | 1 | 1 AP002530.2       | -      |
| ENSG00000218549 | 5.13E-15 | -2.63127 | 1 | 1 OR4K12P          | K04257 |
| ENSG00000218561 | 5.13E-15 | -2.63127 | 1 | 1 RP1-253B10.1     | K02905 |
| ENSG00000218565 | 5.13E-15 | -2.63127 | 1 | 1 RP11-12A2.1      | K09527 |
| ENSG00000218574 | 5.13E-15 | -2.63127 | 1 | 1 HNRNPA1P37       | K12741 |
| ENSG00000218577 | 5.13E-15 | -2.63127 | 1 | 1 RP3-416J7.1      | -      |
| ENSG00000218582 | 5.13E-15 | -2.63127 | 1 | 1 GAPDHP63         | K00134 |
| ENSG00000218586 | 5.13E-15 | -2.63127 | 1 | 1 RP4-791C19.1     | K13709 |
| ENSG00000218596 | 5.13E-15 | -2.63127 | 1 | 1 RP11-2J18.1      | K02957 |
| ENSG00000218617 | 5.13E-15 | -2.63127 | 1 | 1 RP3-407E4.2      | -      |
| ENSG00000218632 | 5.13E-15 | -2.63127 | 1 | 1 RPL7P28          | -      |
| ENSG00000218643 | 5.13E-15 | -2.63127 | 1 | 1 RPL5P20          | K02932 |
| ENSG00000218672 | 5.13E-15 | -2.63127 | 1 | 1 AC008060.7       | -      |
| ENSG00000218676 | 5.13E-15 | -2.63127 | 1 | 1 BRD7P4           | K11723 |
| ENSG00000218689 | 5.13E-15 | -2.63127 | 1 | 1 RPL5P21          | -      |
| ENSG00000218698 | 5.13E-15 | -2.63127 | 1 | 1 ST13P16          | K09560 |
| ENSG00000218713 | 5.13E-15 | -2.63127 | 1 | 1 RP1-34L19.1      | K11493 |
| ENSG00000218716 | 5.13E-15 | -2.63127 | 1 | 1 RPL12P23         | K02870 |
| ENSG00000218725 | 5.13E-15 | -2.63127 | 1 | 1 RP11-174C7.2     | K09654 |
| ENSG00000218728 | 5.13E-15 | -2.63127 | 1 | 1 KRT18P44         | K07604 |
| ENSG00000218730 | 5.13E-15 | -2.63127 | 1 | 1 RP3-453I5.2      | -      |
| ENSG00000218748 | 5.13E-15 | -2.63127 | 1 | 1 DBIP1            | K08762 |
| ENSG00000218749 | 5.13E-15 | -2.63127 | 1 | 1 RP3-340B19.5     | K02920 |
| ENSG00000218754 | 5.13E-15 | -2.63127 | 1 | 1 RPL18AP8         | K02882 |
| ENSG00000218757 | 5.13E-15 | -2.63127 | 1 | 1 RP3-472M2.2      | K02880 |
| ENSG00000218766 | 5.13E-15 | -2.63127 | 1 | 1 RP11-207F8.1     | K04392 |
| ENSG00000218776 | 5.13E-15 | -2.63127 | 1 | 1 RP11-331O9.3     | -      |
| ENSG00000218792 | 5.13E-15 | -2.63127 | 1 | 1 HSPD1P16         | K04077 |
| ENSG00000218803 | 5.13E-15 | -2.63127 | 1 | 1 GSTM2P1          | K00799 |
| ENSG00000218806 | 5.13E-15 | -2.63127 | 1 | 1 RP3-369A17.2     | K12399 |
| ENSG00000218809 | 5.13E-15 | -2.63127 | 1 | 1 RP1-229K20.5     | -      |
| ENSG00000218813 | 5.13E-15 | -2.63127 | 1 | 1 RP11-59D5__B.3   | -      |
| ENSG00000218819 | 5.13E-15 | -2.63127 | 1 | 1 TDRD15           | K18405 |
| ENSG00000218823 | 5.13E-15 | -2.63127 | 1 | 1 PAPOLB           | K14376 |
| ENSG00000218834 | 5.13E-15 | -2.63127 | 1 | 1 RP11-361F19.1    | -      |
| ENSG00000218839 | 5.13E-15 | -2.63127 | 1 | 1 FAM138C          | -      |
| ENSG00000218857 | 5.13E-15 | -2.63127 | 1 | 1 RP1-209B5.2      | K13196 |

|                 |          |          |   |                    |        |
|-----------------|----------|----------|---|--------------------|--------|
| ENSG00000218868 | 5.13E-15 | -2.63127 | 1 | 1 CNN3P1           | -      |
| ENSG00000218870 | 5.13E-15 | -2.63127 | 1 | 1 SLC25A6P6        | -      |
| ENSG00000218872 | 5.13E-15 | -2.63127 | 1 | 1 RP11-249L21.2    | -      |
| ENSG00000218893 | 5.13E-15 | -2.63127 | 1 | 1 SUMO2P12         | K12160 |
| ENSG00000218902 | 5.13E-15 | -2.63127 | 1 | 1 PTMAP3           | K13784 |
| ENSG00000218965 | 5.13E-15 | -2.63127 | 1 | 1 NACAP7           | K03626 |
| ENSG00000218976 | 5.13E-15 | -2.63127 | 1 | 1 RP11-528A10.1    | K00088 |
| ENSG00000218980 | 5.13E-15 | -2.63127 | 1 | 1 FTH1P15          | K00522 |
| ENSG00000218986 | 5.13E-15 | -2.63127 | 1 | 1 RP1-137F1.3      | -      |
| ENSG00000218991 | 5.13E-15 | -2.63127 | 1 | 1 CCNG1P1          | K10145 |
| ENSG00000219016 | 5.13E-15 | -2.63127 | 1 | 1 CTA-299D3.8      | -      |
| ENSG00000219023 | 5.13E-15 | -2.63127 | 1 | 1 RP3-340B19.2     | K02957 |
| ENSG00000219039 | 5.13E-15 | -2.63127 | 1 | 1 AC005102.1       | K12881 |
| ENSG00000219041 | 5.13E-15 | -2.63127 | 1 | 1 IGKV1OR2-118     | -      |
| ENSG00000219061 | 5.13E-15 | -2.63127 | 1 | 1 TRIM51FP         | K12019 |
| ENSG00000219073 | 5.13E-15 | -2.63127 | 1 | 1 CELA3B           | K01345 |
| ENSG00000219074 | 5.13E-15 | -2.63127 | 1 | 1 SOD1P1           | K04565 |
| ENSG00000219087 | 5.13E-15 | -2.63127 | 1 | 1 RP3-433F14.2     | -      |
| ENSG00000219088 | 5.13E-15 | -2.63127 | 1 | 1 RP3-359N14.1     | K10751 |
| ENSG00000219095 | 5.13E-15 | -2.63127 | 1 | 1 RP11-323I14__A.1 | K00287 |
| ENSG00000219102 | 5.13E-15 | -2.63127 | 1 | 1 HNRNPA3P12       | K12741 |
| ENSG00000219133 | 5.13E-15 | -2.63127 | 1 | 1 RP11-203F10.6    | K02889 |
| ENSG00000219135 | 5.13E-15 | -2.63127 | 1 | 1 RP11-129H15.3    | K02893 |
| ENSG00000219139 | 5.13E-15 | -2.63127 | 1 | 1 RP11-304C16.2    | -      |
| ENSG00000219146 | 5.13E-15 | -2.63127 | 1 | 1 RPS4XP8          | K02987 |
| ENSG00000219149 | 5.13E-15 | -2.63127 | 1 | 1 RP11-214N16.2    | K03767 |
| ENSG00000219150 | 5.13E-15 | -2.63127 | 1 | 1 RP11-569A2.2     | K02889 |
| ENSG00000219159 | 5.13E-15 | -2.63127 | 1 | 1 AC011298.2       | -      |
| ENSG00000219186 | 5.13E-15 | -2.63127 | 1 | 1 FTH1P19          | K00522 |
| ENSG00000219188 | 5.13E-15 | -2.63127 | 1 | 1 CACYBPP3         | -      |
| ENSG00000219190 | 5.13E-15 | -2.63127 | 1 | 1 RP1-253B10.2     | K18401 |
| ENSG00000219222 | 5.13E-15 | -2.63127 | 1 | 1 RP11-480N24.3    | K02870 |
| ENSG00000219240 | 5.13E-15 | -2.63127 | 1 | 1 RP11-63K6.5      | K12175 |
| ENSG00000219249 | 5.13E-15 | -2.63127 | 1 | 1 AMZ2P2           | K06974 |
| ENSG00000219253 | 5.13E-15 | -2.63127 | 1 | 1 RPS6P7           | K02991 |
| ENSG00000219257 | 5.13E-15 | -2.63127 | 1 | 1 NPM1P38          | K11276 |
| ENSG00000219262 | 5.13E-15 | -2.63127 | 1 | 1 OR2E1P           | K04257 |
| ENSG00000219273 | 5.13E-15 | -2.63127 | 1 | 1 RP1-217P22.2     | K09522 |
| ENSG00000219274 | 5.13E-15 | -2.63127 | 1 | 1 RPS20P2          | K02969 |
| ENSG00000219280 | 5.13E-15 | -2.63127 | 1 | 1 VN1R8P           | K04614 |
| ENSG00000219284 | 5.13E-15 | -2.63127 | 1 | 1 RP11-151M7.1     | -      |
| ENSG00000219294 | 5.13E-15 | -2.63127 | 1 | 1 PIP5K1P1         | K00889 |
| ENSG00000219297 | 5.13E-15 | -2.63127 | 1 | 1 MRPL42P3         | -      |
| ENSG00000219302 | 5.13E-15 | -2.63127 | 1 | 1 RP11-174C7.3     | -      |
| ENSG00000219314 | 5.13E-15 | -2.63127 | 1 | 1 RP1-273P12.1     | -      |
| ENSG00000219329 | 5.13E-15 | -2.63127 | 1 | 1 RP11-397G5.2     | -      |
| ENSG00000219361 | 5.13E-15 | -2.63127 | 1 | 1 RP11-250B2.2     | K02998 |
| ENSG00000219368 | 5.13E-15 | -2.63127 | 1 | 1 ZNF299P          | K09228 |
| ENSG00000219374 | 5.13E-15 | -2.63127 | 1 | 1 EEF1A1P42        | K03231 |
| ENSG00000219375 | 5.13E-15 | -2.63127 | 1 | 1 RP11-69L16.3     | K02128 |
| ENSG00000219384 | 5.13E-15 | -2.63127 | 1 | 1 RP11-491H9.3     | -      |
| ENSG00000219387 | 5.13E-15 | -2.63127 | 1 | 1 ATF1P1           | K09053 |
| ENSG00000219404 | 5.13E-15 | -2.63127 | 1 | 1 RP11-524C21.1    | -      |
| ENSG00000219409 | 5.13E-15 | -2.63127 | 1 | 1 RP11-106E7.1     | K09651 |
| ENSG00000219430 | 5.13E-15 | -2.63127 | 1 | 1 MBL3P            | K03991 |
| ENSG00000219438 | 5.13E-15 | -2.63127 | 1 | 1 FAM19A5          | -      |
| ENSG00000219445 | 5.13E-15 | -2.63127 | 1 | 1 RP11-3B12.3      | -      |
| ENSG00000219448 | 5.13E-15 | -2.63127 | 1 | 1 RP11-193H22.2    | K17985 |

|                 |          |          |   |                   |        |
|-----------------|----------|----------|---|-------------------|--------|
| ENSG00000219453 | 5.13E-15 | -2.63127 | 1 | 1 RP4-810F7.1     | -      |
| ENSG00000219463 | 5.13E-15 | -2.63127 | 1 | 1 RPSAP42         | K02998 |
| ENSG00000219487 | 5.13E-15 | -2.63127 | 1 | 1 RP11-365H23.1   | K11094 |
| ENSG00000219491 | 5.13E-15 | -2.63127 | 1 | 1 TPT1P8          | -      |
| ENSG00000219492 | 5.13E-15 | -2.63127 | 1 | 1 RP11-1396O13.13 | K09228 |
| ENSG00000219500 | 5.13E-15 | -2.63127 | 1 | 1 RP11-15J23.1    | -      |
| ENSG00000219532 | 5.13E-15 | -2.63127 | 1 | 1 RP3-323K23.3    | K09228 |
| ENSG00000219547 | 5.13E-15 | -2.63127 | 1 | 1 RPL17P25        | K02880 |
| ENSG00000219549 | 5.13E-15 | -2.63127 | 1 | 1 RP11-374I15.1   | -      |
| ENSG00000219559 | 5.13E-15 | -2.63127 | 1 | 1 RP11-346C16.4   | K02966 |
| ENSG00000219575 | 5.13E-15 | -2.63127 | 1 | 1 RP1-288M22.1    | -      |
| ENSG00000219582 | 5.13E-15 | -2.63127 | 1 | 1 HNRNPA1P58      | K12741 |
| ENSG00000219592 | 5.13E-15 | -2.63127 | 1 | 1 NCSTNP1         | -      |
| ENSG00000219604 | 5.13E-15 | -2.63127 | 1 | 1 RP11-132M7.2    | -      |
| ENSG00000219619 | 5.13E-15 | -2.63127 | 1 | 1 RP11-126M14.1   | K02140 |
| ENSG00000219622 | 5.13E-15 | -2.63127 | 1 | 1 RP11-291C6.1    | -      |
| ENSG00000219627 | 5.13E-15 | -2.63127 | 1 | 1 CYCSP17         | K08738 |
| ENSG00000219653 | 5.13E-15 | -2.63127 | 1 | 1 GCNT1P4         | -      |
| ENSG00000219665 | 5.13E-15 | -2.63127 | 1 | 1 CTD-2006C1.2    | -      |
| ENSG00000219666 | 5.13E-15 | -2.63127 | 1 | 1 RP11-174C7.1    | K12160 |
| ENSG00000219669 | 5.13E-15 | -2.63127 | 1 | 1 RP1-20N4.1      | -      |
| ENSG00000219681 | 5.13E-15 | -2.63127 | 1 | 1 RP11-191A15.4   | -      |
| ENSG00000219693 | 5.13E-15 | -2.63127 | 1 | 1 RP11-262H14.11  | K04358 |
| ENSG00000219700 | 5.13E-15 | -2.63127 | 1 | 1 PTCHD3P3        | -      |
| ENSG00000219702 | 5.13E-15 | -2.63127 | 1 | 1 RP5-991C6.2     | K02866 |
| ENSG00000219703 | 5.13E-15 | -2.63127 | 1 | 1 RP1-92C8.2      | K07836 |
| ENSG00000219722 | 5.13E-15 | -2.63127 | 1 | 1 RPL26P20        | K02898 |
| ENSG00000219738 | 5.13E-15 | -2.63127 | 1 | 1 XXbac-BPG34I8.3 | K06510 |
| ENSG00000219757 | 5.13E-15 | -2.63127 | 1 | 1 RP11-793L10.1   | -      |
| ENSG00000219758 | 5.13E-15 | -2.63127 | 1 | 1 RP1-249H1.3     | K02908 |
| ENSG00000219773 | 5.13E-15 | -2.63127 | 1 | 1 RP11-506B6.3    | K02998 |
| ENSG00000219776 | 5.13E-15 | -2.63127 | 1 | 1 RPL21P67        | K02889 |
| ENSG00000219784 | 5.13E-15 | -2.63127 | 1 | 1 RP1-172I22.1    | K11830 |
| ENSG00000219790 | 5.13E-15 | -2.63127 | 1 | 1 OSTCP6          | -      |
| ENSG00000219797 | 5.13E-15 | -2.63127 | 1 | 1 PPIAP9          | K03767 |
| ENSG00000219806 | 5.13E-15 | -2.63127 | 1 | 1 ATP5F1P6        | K02127 |
| ENSG00000219807 | 5.13E-15 | -2.63127 | 1 | 1 ARF1P1          | K07937 |
| ENSG00000219814 | 5.13E-15 | -2.63127 | 1 | 1 XX-C2158C6.2    | K02893 |
| ENSG00000219863 | 5.13E-15 | -2.63127 | 1 | 1 RPL31P28        | K02910 |
| ENSG00000219867 | 5.13E-15 | -2.63127 | 1 | 1 RP11-40G16.1    | K04513 |
| ENSG00000219870 | 5.13E-15 | -2.63127 | 1 | 1 RP11-430A19.2   | K05752 |
| ENSG00000219881 | 5.13E-15 | -2.63127 | 1 | 1 GAPDHP42        | K00134 |
| ENSG00000219902 | 5.13E-15 | -2.63127 | 1 | 1 RPL35P3         | K02918 |
| ENSG00000219926 | 5.13E-15 | -2.63127 | 1 | 1 RP11-394A14.2   | -      |
| ENSG00000219928 | 5.13E-15 | -2.63127 | 1 | 1 RP11-40C6.2     | K02980 |
| ENSG00000219930 | 5.13E-15 | -2.63127 | 1 | 1 GAPDHP67        | K00134 |
| ENSG00000219940 | 5.13E-15 | -2.63127 | 1 | 1 SPTLC1P3        | K00654 |
| ENSG00000219941 | 5.13E-15 | -2.63127 | 1 | 1 KRT18P50        | K07604 |
| ENSG00000219951 | 5.13E-15 | -2.63127 | 1 | 1 RP11-378G13.2   | K00134 |
| ENSG00000219993 | 5.13E-15 | -2.63127 | 1 | 1 RP11-288G3.3    | K02976 |
| ENSG00000220008 | 5.13E-15 | -2.63127 | 1 | 1 LINGO3          | -      |
| ENSG00000220030 | 5.13E-15 | -2.63127 | 1 | 1 RP1-91N13.1     | -      |
| ENSG00000220032 | 5.13E-15 | -2.63127 | 1 | 1 RP11-17M16.1    | -      |
| ENSG00000220069 | 5.13E-15 | -2.63127 | 1 | 1 RPL7P27         | K02937 |
| ENSG00000220076 | 5.13E-15 | -2.63127 | 1 | 1 RP1-207H1.2     | K02981 |
| ENSG00000220091 | 5.13E-15 | -2.63127 | 1 | 1 LAP3P1          | -      |
| ENSG00000220105 | 5.13E-15 | -2.63127 | 1 | 1 RP11-307I14.2   | K02989 |
| ENSG00000220110 | 5.13E-15 | -2.63127 | 1 | 1 RP1-6P5.2       | K02889 |

|                 |          |          |   |                 |        |
|-----------------|----------|----------|---|-----------------|--------|
| ENSG00000220113 | 5.13E-15 | -2.63127 | 1 | 1 MTCYBP4       | K00412 |
| ENSG00000220125 | 5.13E-15 | -2.63127 | 1 | 1 MRPL32P1      | -      |
| ENSG00000220130 | 5.13E-15 | -2.63127 | 1 | 1 RP1-72A23.3   | -      |
| ENSG00000220131 | 5.13E-15 | -2.63127 | 1 | 1 RP4-570O12.2  | K02955 |
| ENSG00000220132 | 5.13E-15 | -2.63127 | 1 | 1 AF238380.8    | -      |
| ENSG00000220139 | 5.13E-15 | -2.63127 | 1 | 1 RP3-354N19.1  | -      |
| ENSG00000220154 | 5.13E-15 | -2.63127 | 1 | 1 RP11-46B11.2  | K02964 |
| ENSG00000220161 | 5.13E-15 | -2.63127 | 1 | 1 RP1-37N7.3    | -      |
| ENSG00000220181 | 5.13E-15 | -2.63127 | 1 | 1 RP11-486M3.2  | -      |
| ENSG00000220184 | 5.13E-15 | -2.63127 | 1 | 1 HMGB3P18      | K11296 |
| ENSG00000220204 | 5.13E-15 | -2.63127 | 1 | 1 RP1-53C18.3   | K09503 |
| ENSG00000220212 | 5.13E-15 | -2.63127 | 1 | 1 OR4F1P        | K04257 |
| ENSG00000220237 | 5.13E-15 | -2.63127 | 1 | 1 RPS24P12      | -      |
| ENSG00000220240 | 5.13E-15 | -2.63127 | 1 | 1 RP11-76H14.5  | K07364 |
| ENSG00000220248 | 5.13E-15 | -2.63127 | 1 | 1 ZNF402P       | -      |
| ENSG00000220256 | 5.13E-15 | -2.63127 | 1 | 1 AC093802.1    | K06115 |
| ENSG00000220267 | 5.13E-15 | -2.63127 | 1 | 1 ACTBP8        | K05692 |
| ENSG00000220291 | 5.13E-15 | -2.63127 | 1 | 1 RP3-455E7.1   | -      |
| ENSG00000220311 | 5.13E-15 | -2.63127 | 1 | 1 RPL35AP18     | K02917 |
| ENSG00000220323 | 5.13E-15 | -2.63127 | 1 | 1 HIST2H2BD     | K11252 |
| ENSG00000220326 | 5.13E-15 | -2.63127 | 1 | 1 RP11-129H15.1 | K02268 |
| ENSG00000220340 | 5.13E-15 | -2.63127 | 1 | 1 RP3-433F14.1  | K02256 |
| ENSG00000220343 | 5.13E-15 | -2.63127 | 1 | 1 RP11-440K22.1 | K03767 |
| ENSG00000220347 | 5.13E-15 | -2.63127 | 1 | 1 RP11-230C9.1  | K11253 |
| ENSG00000220349 | 5.13E-15 | -2.63127 | 1 | 1 RP3-431A14.4  | -      |
| ENSG00000220370 | 5.13E-15 | -2.63127 | 1 | 1 RP3-399J4.2   | K02936 |
| ENSG00000220377 | 5.13E-15 | -2.63127 | 1 | 1 RP1-152L7.3   | K00799 |
| ENSG00000220412 | 5.13E-15 | -2.63127 | 1 | 1 RP11-95M15.2  | K07293 |
| ENSG00000220418 | 5.13E-15 | -2.63127 | 1 | 1 TUBB3P1       | K07375 |
| ENSG00000220446 | 5.13E-15 | -2.63127 | 1 | 1 RP3-520B18.1  | -      |
| ENSG00000220447 | 5.13E-15 | -2.63127 | 1 | 1 RP1-276J11.2  | K02957 |
| ENSG00000220483 | 5.13E-15 | -2.63127 | 1 | 1 SLC25A51P1    | -      |
| ENSG00000220494 | 5.13E-15 | -2.63127 | 1 | 1 YAPIP1        | K16687 |
| ENSG00000220505 | 5.13E-15 | -2.63127 | 1 | 1 EIF4EBP2P3    | K18644 |
| ENSG00000220514 | 5.13E-15 | -2.63127 | 1 | 1 RP11-331O9.6  | -      |
| ENSG00000220515 | 5.13E-15 | -2.63127 | 1 | 1 PGAM1P10      | K01834 |
| ENSG00000220517 | 5.13E-15 | -2.63127 | 1 | 1 ASS1P1        | K01940 |
| ENSG00000220522 | 5.13E-15 | -2.63127 | 1 | 1 RP1-177A13.1  | -      |
| ENSG00000220537 | 5.13E-15 | -2.63127 | 1 | 1 RP3-492P14.2  | -      |
| ENSG00000220540 | 5.13E-15 | -2.63127 | 1 | 1 RP1-298M8.1   | K09228 |
| ENSG00000220541 | 5.13E-15 | -2.63127 | 1 | 1 RP5-1170D6.1  | K09567 |
| ENSG00000220548 | 5.13E-15 | -2.63127 | 1 | 1 VIMP1         | K07606 |
| ENSG00000220553 | 5.13E-15 | -2.63127 | 1 | 1 RPL5P19       | -      |
| ENSG00000220556 | 5.13E-15 | -2.63127 | 1 | 1 RP1-202I21.3  | -      |
| ENSG00000220557 | 5.13E-15 | -2.63127 | 1 | 1 HMGB1P13      | K10802 |
| ENSG00000220575 | 5.13E-15 | -2.63127 | 1 | 1 HTR5A-AS1     | K04161 |
| ENSG00000220581 | 5.13E-15 | -2.63127 | 1 | 1 VN1R12P       | K04614 |
| ENSG00000220585 | 5.13E-15 | -2.63127 | 1 | 1 DDX18P6       | K13179 |
| ENSG00000220586 | 5.13E-15 | -2.63127 | 1 | 1 TUBBP9        | K07375 |
| ENSG00000220598 | 5.13E-15 | -2.63127 | 1 | 1 SSR1P1        | -      |
| ENSG00000220600 | 5.13E-15 | -2.63127 | 1 | 1 RP3-509I19.6  | K12160 |
| ENSG00000220614 | 5.13E-15 | -2.63127 | 1 | 1 RP11-480N24.4 | K02915 |
| ENSG00000220635 | 5.13E-15 | -2.63127 | 1 | 1 KRASP1        | K07827 |
| ENSG00000220643 | 5.13E-15 | -2.63127 | 1 | 1 RP3-391O22.1  | K02929 |
| ENSG00000220666 | 5.13E-15 | -2.63127 | 1 | 1 RCC2P7        | -      |
| ENSG00000220694 | 5.13E-15 | -2.63127 | 1 | 1 RP3-403A15.1  | K02880 |
| ENSG00000220721 | 5.13E-15 | -2.63127 | 1 | 1 OR1F12        | K04257 |
| ENSG00000220725 | 5.13E-15 | -2.63127 | 1 | 1 RP11-228O6.2  | -      |

|                 |          |          |   |                   |        |
|-----------------|----------|----------|---|-------------------|--------|
| ENSG00000220730 | 5.13E-15 | -2.63127 | 1 | 1 RP11-474L11.3   | K11253 |
| ENSG00000220733 | 5.13E-15 | -2.63127 | 1 | 1 RP11-331O9.5    | -      |
| ENSG00000220734 | 5.13E-15 | -2.63127 | 1 | 1 RP3-510O8.3     | K13800 |
| ENSG00000220739 | 5.13E-15 | -2.63127 | 1 | 1 RP11-277I20.3   | K01794 |
| ENSG00000220744 | 5.13E-15 | -2.63127 | 1 | 1 RPL5P18         | K02932 |
| ENSG00000220745 | 5.13E-15 | -2.63127 | 1 | 1 RP1-101K10.4    | -      |
| ENSG00000220748 | 5.13E-15 | -2.63127 | 1 | 1 RP1-59B16.1     | K18329 |
| ENSG00000220758 | 5.13E-15 | -2.63127 | 1 | 1 VN1R10P         | -      |
| ENSG00000220771 | 5.13E-15 | -2.63127 | 1 | 1 RP3-322L4.2     | -      |
| ENSG00000220831 | 5.13E-15 | -2.63127 | 1 | 1 NDUFA5P9        | K03949 |
| ENSG00000220867 | 5.13E-15 | -2.63127 | 1 | 1 HSPE1P26        | K04078 |
| ENSG00000220868 | 5.13E-15 | -2.63127 | 1 | 1 MRPL35P1        | K02916 |
| ENSG00000220871 | 5.13E-15 | -2.63127 | 1 | 1 DNAJC19P6       | K09539 |
| ENSG00000220884 | 5.13E-15 | -2.63127 | 1 | 1 MESTP1          | -      |
| ENSG00000220891 | 5.13E-15 | -2.63127 | 1 | 1 LL22NC03-63E9.3 | K12022 |
| ENSG00000220908 | 5.13E-15 | -2.63127 | 1 | 1 RP11-127B16.1   | -      |
| ENSG00000220913 | 5.13E-15 | -2.63127 | 1 | 1 RP11-235G24.2   | K09644 |
| ENSG00000220918 | 5.13E-15 | -2.63127 | 1 | 1 RP1-92C4.1      | -      |
| ENSG00000220924 | 5.13E-15 | -2.63127 | 1 | 1 OSTCP4          | -      |
| ENSG00000220948 | 5.13E-15 | -2.63127 | 1 | 1 TRIM51GP        | K12019 |
| ENSG00000220949 | 5.13E-15 | -2.63127 | 1 | 1 CTC-499B15.1    | K09228 |
| ENSG00000220960 | 5.13E-15 | -2.63127 | 1 | 1 RP1-72A23.1     | K12403 |
| ENSG00000220981 | 5.13E-15 | -2.63127 | 1 | 1 AL391384.1      | -      |
| ENSG00000220982 | 5.13E-15 | -2.63127 | 1 | 1 AC009784.1      | -      |
| ENSG00000220984 | 5.13E-15 | -2.63127 | 1 | 1 AC025674.1      | -      |
| ENSG00000220986 | 5.13E-15 | -2.63127 | 1 | 1 SNORA50         | -      |
| ENSG00000220987 | 5.13E-15 | -2.63127 | 1 | 1 AC084368.1      | -      |
| ENSG00000220988 | 5.13E-15 | -2.63127 | 1 | 1 SNORD88C        | -      |
| ENSG00000220989 | 5.13E-15 | -2.63127 | 1 | 1 AC063944.1      | -      |
| ENSG00000220990 | 5.13E-15 | -2.63127 | 1 | 1 AL450423.1      | -      |
| ENSG00000220992 | 5.13E-15 | -2.63127 | 1 | 1 AL158151.1      | -      |
| ENSG00000220993 | 5.13E-15 | -2.63127 | 1 | 1 AC007611.1      | -      |
| ENSG00000220996 | 5.13E-15 | -2.63127 | 1 | 1 AC034236.1      | -      |
| ENSG00000220997 | 5.13E-15 | -2.63127 | 1 | 1 AL161651.1      | -      |
| ENSG00000220999 | 5.13E-15 | -2.63127 | 1 | 1 AC012671.1      | -      |
| ENSG00000221000 | 5.13E-15 | -2.63127 | 1 | 1 AC116165.1      | -      |
| ENSG00000221002 | 5.13E-15 | -2.63127 | 1 | 1 AC022120.1      | -      |
| ENSG00000221003 | 5.13E-15 | -2.63127 | 1 | 1 AC131254.1      | -      |
| ENSG00000221005 | 5.13E-15 | -2.63127 | 1 | 1 AL161723.1      | -      |
| ENSG00000221007 | 5.13E-15 | -2.63127 | 1 | 1 AL354984.1      | -      |
| ENSG00000221008 | 5.13E-15 | -2.63127 | 1 | 1 AC136698.1      | -      |
| ENSG00000221010 | 5.13E-15 | -2.63127 | 1 | 1 AL008708.1      | -      |
| ENSG00000221011 | 5.13E-15 | -2.63127 | 1 | 1 AC079804.1      | -      |
| ENSG00000221015 | 5.13E-15 | -2.63127 | 1 | 1 RNU6ATAC29P     | -      |
| ENSG00000221016 | 5.13E-15 | -2.63127 | 1 | 1 AC002558.1      | -      |
| ENSG00000221017 | 5.13E-15 | -2.63127 | 1 | 1 MIR1323         | -      |
| ENSG00000221018 | 5.13E-15 | -2.63127 | 1 | 1 AC136365.1      | -      |
| ENSG00000221019 | 5.13E-15 | -2.63127 | 1 | 1 AC127526.1      | -      |
| ENSG00000221021 | 5.13E-15 | -2.63127 | 1 | 1 AL035697.1      | -      |
| ENSG00000221023 | 5.13E-15 | -2.63127 | 1 | 1 RNU6ATAC19P     | -      |
| ENSG00000221025 | 5.13E-15 | -2.63127 | 1 | 1 MIR1250         | -      |
| ENSG00000221026 | 5.13E-15 | -2.63127 | 1 | 1 AL592063.1      | -      |
| ENSG00000221027 | 5.13E-15 | -2.63127 | 1 | 1 AC068020.1      | -      |
| ENSG00000221028 | 5.13E-15 | -2.63127 | 1 | 1 MIR1231         | -      |
| ENSG00000221029 | 5.13E-15 | -2.63127 | 1 | 1 AC016194.1      | -      |
| ENSG00000221030 | 5.13E-15 | -2.63127 | 1 | 1 AC010930.1      | -      |
| ENSG00000221031 | 5.13E-15 | -2.63127 | 1 | 1 CoTC_ribozyme   | -      |
| ENSG00000221032 | 5.13E-15 | -2.63127 | 1 | 1 AL590683.1      | -      |

|                 |          |          |   |                  |    |
|-----------------|----------|----------|---|------------------|----|
| ENSG00000221033 | 5.13E-15 | -2.63127 | 1 | 1 MIR1272        | -- |
| ENSG00000221035 | 5.13E-15 | -2.63127 | 1 | 1 MIR486         | -- |
| ENSG00000221036 | 5.13E-15 | -2.63127 | 1 | 1 MIR1193        | -- |
| ENSG00000221037 | 5.13E-15 | -2.63127 | 1 | 1 AC090099.1     | -- |
| ENSG00000221038 | 5.13E-15 | -2.63127 | 1 | 1 RNU6ATAC7P     | -- |
| ENSG00000221039 | 5.13E-15 | -2.63127 | 1 | 1 MIR1286        | -- |
| ENSG00000221040 | 5.13E-15 | -2.63127 | 1 | 1 U3             | -- |
| ENSG00000221041 | 5.13E-15 | -2.63127 | 1 | 1 AP001537.1     | -- |
| ENSG00000221042 | 5.13E-15 | -2.63127 | 1 | 1 CPEB3_ribozyme | -- |
| ENSG00000221043 | 5.13E-15 | -2.63127 | 1 | 1 U3             | -- |
| ENSG00000221046 | 5.13E-15 | -2.63127 | 1 | 1 RNU6ATAC38P    | -- |
| ENSG00000221048 | 5.13E-15 | -2.63127 | 1 | 1 AC079781.1     | -- |
| ENSG00000221050 | 5.13E-15 | -2.63127 | 1 | 1 AC091304.1     | -- |
| ENSG00000221052 | 5.13E-15 | -2.63127 | 1 | 1 MIR1266        | -- |
| ENSG00000221053 | 5.13E-15 | -2.63127 | 1 | 1 AC115286.1     | -- |
| ENSG00000221055 | 5.13E-15 | -2.63127 | 1 | 1 MIR1302-3      | -- |
| ENSG00000221058 | 5.13E-15 | -2.63127 | 1 | 1 AC090666.1     | -- |
| ENSG00000221059 | 5.13E-15 | -2.63127 | 1 | 1 RNU6ATAC6P     | -- |
| ENSG00000221060 | 5.13E-15 | -2.63127 | 1 | 1 SNORA11        | -- |
| ENSG00000221062 | 5.13E-15 | -2.63127 | 1 | 1 MIR1292        | -- |
| ENSG00000221065 | 5.13E-15 | -2.63127 | 1 | 1 MIR1233-2      | -- |
| ENSG00000221066 | 5.13E-15 | -2.63127 | 1 | 1 SNORD111       | -- |
| ENSG00000221067 | 5.13E-15 | -2.63127 | 1 | 1 MIR1280        | -- |
| ENSG00000221069 | 5.13E-15 | -2.63127 | 1 | 1 AC000029.1     | -- |
| ENSG00000221070 | 5.13E-15 | -2.63127 | 1 | 1 AC008625.1     | -- |
| ENSG00000221072 | 5.13E-15 | -2.63127 | 1 | 1 AC124853.1     | -- |
| ENSG00000221073 | 5.13E-15 | -2.63127 | 1 | 1 AC112198.2     | -- |
| ENSG00000221074 | 5.13E-15 | -2.63127 | 1 | 1 AC078851.2     | -- |
| ENSG00000221075 | 5.13E-15 | -2.63127 | 1 | 1 AC119751.1     | -- |
| ENSG00000221077 | 5.13E-15 | -2.63127 | 1 | 1 AL117190.1     | -- |
| ENSG00000221079 | 5.13E-15 | -2.63127 | 1 | 1 AC083829.1     | -- |
| ENSG00000221081 | 5.13E-15 | -2.63127 | 1 | 1 MIR320D2       | -- |
| ENSG00000221082 | 5.13E-15 | -2.63127 | 1 | 1 AC119751.2     | -- |
| ENSG00000221083 | 5.13E-15 | -2.63127 | 1 | 1 SNORA77        | -- |
| ENSG00000221084 | 5.13E-15 | -2.63127 | 1 | 1 AP000547.1     | -- |
| ENSG00000221085 | 5.13E-15 | -2.63127 | 1 | 1 AC096664.3     | -- |
| ENSG00000221087 | 5.13E-15 | -2.63127 | 1 | 1 AC096546.1     | -- |
| ENSG00000221091 | 5.13E-15 | -2.63127 | 1 | 1 MIR1302-5      | -- |
| ENSG00000221093 | 5.13E-15 | -2.63127 | 1 | 1 SNORA3         | -- |
| ENSG00000221094 | 5.13E-15 | -2.63127 | 1 | 1 AL671972.1     | -- |
| ENSG00000221095 | 5.13E-15 | -2.63127 | 1 | 1 AC135995.1     | -- |
| ENSG00000221096 | 5.13E-15 | -2.63127 | 1 | 1 AC092757.1     | -- |
| ENSG00000221100 | 5.13E-15 | -2.63127 | 1 | 1 AL138706.1     | -- |
| ENSG00000221101 | 5.13E-15 | -2.63127 | 1 | 1 AL391417.1     | -- |
| ENSG00000221102 | 5.13E-15 | -2.63127 | 1 | 1 SNORA11B       | -- |
| ENSG00000221104 | 5.13E-15 | -2.63127 | 1 | 1 AC092865.1     | -- |
| ENSG00000221105 | 5.13E-15 | -2.63127 | 1 | 1 AL159997.1     | -- |
| ENSG00000221108 | 5.13E-15 | -2.63127 | 1 | 1 AL845259.1     | -- |
| ENSG00000221110 | 5.13E-15 | -2.63127 | 1 | 1 AL449083.1     | -- |
| ENSG00000221111 | 5.13E-15 | -2.63127 | 1 | 1 AL590726.2     | -- |
| ENSG00000221112 | 5.13E-15 | -2.63127 | 1 | 1 AP000908.1     | -- |
| ENSG00000221113 | 5.13E-15 | -2.63127 | 1 | 1 AC104133.1     | -- |
| ENSG00000221114 | 5.13E-15 | -2.63127 | 1 | 1 RNU6ATAC30P    | -- |
| ENSG00000221115 | 5.13E-15 | -2.63127 | 1 | 1 AC020910.1     | -- |
| ENSG00000221116 | 5.13E-15 | -2.63127 | 1 | 1 SNORD110       | -- |
| ENSG00000221118 | 5.13E-15 | -2.63127 | 1 | 1 AC112249.1     | -- |
| ENSG00000221120 | 5.13E-15 | -2.63127 | 1 | 1 MIR1224        | -- |
| ENSG00000221121 | 5.13E-15 | -2.63127 | 1 | 1 AC083811.1     | -- |

|                 |          |          |   |               |    |
|-----------------|----------|----------|---|---------------|----|
| ENSG00000221122 | 5.13E-15 | -2.63127 | 1 | 1 AC098869.1  | -- |
| ENSG00000221123 | 5.13E-15 | -2.63127 | 1 | 1 AC104417.1  | -- |
| ENSG00000221125 | 5.13E-15 | -2.63127 | 1 | 1 U3          | -- |
| ENSG00000221126 | 5.13E-15 | -2.63127 | 1 | 1 AC092265.1  | -- |
| ENSG00000221128 | 5.13E-15 | -2.63127 | 1 | 1 AC007450.1  | -- |
| ENSG00000221130 | 5.13E-15 | -2.63127 | 1 | 1 AP001482.1  | -- |
| ENSG00000221131 | 5.13E-15 | -2.63127 | 1 | 1 AC008410.1  | -- |
| ENSG00000221132 | 5.13E-15 | -2.63127 | 1 | 1 AL035422.1  | -- |
| ENSG00000221134 | 5.13E-15 | -2.63127 | 1 | 1 AC007339.1  | -- |
| ENSG00000221135 | 5.13E-15 | -2.63127 | 1 | 1 AC021078.1  | -- |
| ENSG00000221136 | 5.13E-15 | -2.63127 | 1 | 1 AC131094.1  | -- |
| ENSG00000221137 | 5.13E-15 | -2.63127 | 1 | 1 AC013751.1  | -- |
| ENSG00000221139 | 5.13E-15 | -2.63127 | 1 | 1 SNORD23     | -- |
| ENSG00000221141 | 5.13E-15 | -2.63127 | 1 | 1 AC126323.1  | -- |
| ENSG00000221142 | 5.13E-15 | -2.63127 | 1 | 1 AC104405.1  | -- |
| ENSG00000221145 | 5.13E-15 | -2.63127 | 1 | 1 AL136987.1  | -- |
| ENSG00000221147 | 5.13E-15 | -2.63127 | 1 | 1 MIR1270-2   | -- |
| ENSG00000221148 | 5.13E-15 | -2.63127 | 1 | 1 SNORA3      | -- |
| ENSG00000221156 | 5.13E-15 | -2.63127 | 1 | 1 AC007551.1  | -- |
| ENSG00000221157 | 5.13E-15 | -2.63127 | 1 | 1 AC009196.1  | -- |
| ENSG00000221160 | 5.13E-15 | -2.63127 | 1 | 1 MIR1281     | -- |
| ENSG00000221163 | 5.13E-15 | -2.63127 | 1 | 1 AL138963.1  | -- |
| ENSG00000221165 | 5.13E-15 | -2.63127 | 1 | 1 AL359983.1  | -- |
| ENSG00000221167 | 5.13E-15 | -2.63127 | 1 | 1 AC008397.1  | -- |
| ENSG00000221170 | 5.13E-15 | -2.63127 | 1 | 1 MIR1304     | -- |
| ENSG00000221172 | 5.13E-15 | -2.63127 | 1 | 1 AC091096.1  | -- |
| ENSG00000221173 | 5.13E-15 | -2.63127 | 1 | 1 AL161908.1  | -- |
| ENSG00000221174 | 5.13E-15 | -2.63127 | 1 | 1 AL050327.1  | -- |
| ENSG00000221175 | 5.13E-15 | -2.63127 | 1 | 1 AL391538.1  | -- |
| ENSG00000221176 | 5.13E-15 | -2.63127 | 1 | 1 MIR1207     | -- |
| ENSG00000221177 | 5.13E-15 | -2.63127 | 1 | 1 AC126339.1  | -- |
| ENSG00000221178 | 5.13E-15 | -2.63127 | 1 | 1 AC008045.1  | -- |
| ENSG00000221179 | 5.13E-15 | -2.63127 | 1 | 1 AC016670.1  | -- |
| ENSG00000221180 | 5.13E-15 | -2.63127 | 1 | 1 AB019440.1  | -- |
| ENSG00000221181 | 5.13E-15 | -2.63127 | 1 | 1 AC078899.5  | -- |
| ENSG00000221182 | 5.13E-15 | -2.63127 | 1 | 1 SNORD98     | -- |
| ENSG00000221183 | 5.13E-15 | -2.63127 | 1 | 1 AC093897.1  | -- |
| ENSG00000221185 | 5.13E-15 | -2.63127 | 1 | 1 AC103816.1  | -- |
| ENSG00000221186 | 5.13E-15 | -2.63127 | 1 | 1 AC114798.1  | -- |
| ENSG00000221187 | 5.13E-15 | -2.63127 | 1 | 1 MIR548M     | -- |
| ENSG00000221189 | 5.13E-15 | -2.63127 | 1 | 1 AC108211.1  | -- |
| ENSG00000221190 | 5.13E-15 | -2.63127 | 1 | 1 MIR1184-3   | -- |
| ENSG00000221191 | 5.13E-15 | -2.63127 | 1 | 1 AL662890.1  | -- |
| ENSG00000221192 | 5.13E-15 | -2.63127 | 1 | 1 AC004745.1  | -- |
| ENSG00000221195 | 5.13E-15 | -2.63127 | 1 | 1 AC008780.1  | -- |
| ENSG00000221198 | 5.13E-15 | -2.63127 | 1 | 1 AL138696.1  | -- |
| ENSG00000221199 | 5.13E-15 | -2.63127 | 1 | 1 AC114765.3  | -- |
| ENSG00000221200 | 5.13E-15 | -2.63127 | 1 | 1 MIR1253     | -- |
| ENSG00000221201 | 5.13E-15 | -2.63127 | 1 | 1 AL031655.1  | -- |
| ENSG00000221202 | 5.13E-15 | -2.63127 | 1 | 1 AC012050.1  | -- |
| ENSG00000221206 | 5.13E-15 | -2.63127 | 1 | 1 RNU6ATAC15P | -- |
| ENSG00000221210 | 5.13E-15 | -2.63127 | 1 | 1 AP001137.1  | -- |
| ENSG00000221211 | 5.13E-15 | -2.63127 | 1 | 1 AC078794.1  | -- |
| ENSG00000221214 | 5.13E-15 | -2.63127 | 1 | 1 MIR548E     | -- |
| ENSG00000221216 | 5.13E-15 | -2.63127 | 1 | 1 RNU6ATAC27P | -- |
| ENSG00000221217 | 5.13E-15 | -2.63127 | 1 | 1 AL359851.1  | -- |
| ENSG00000221218 | 5.13E-15 | -2.63127 | 1 | 1 AC009997.1  | -- |
| ENSG00000221219 | 5.13E-15 | -2.63127 | 1 | 1 AC110298.1  | -- |

|                 |          |          |   |   |             |    |
|-----------------|----------|----------|---|---|-------------|----|
| ENSG00000221220 | 5.13E-15 | -2.63127 | 1 | 1 | AL035045.1  | -- |
| ENSG00000221221 | 5.13E-15 | -2.63127 | 1 | 1 | AL139815.1  | -- |
| ENSG00000221222 | 5.13E-15 | -2.63127 | 1 | 1 | AL139139.1  | -- |
| ENSG00000221225 | 5.13E-15 | -2.63127 | 1 | 1 | AL138837.1  | -- |
| ENSG00000221226 | 5.13E-15 | -2.63127 | 1 | 1 | AC092724.1  | -- |
| ENSG00000221227 | 5.13E-15 | -2.63127 | 1 | 1 | MIR1305     | -- |
| ENSG00000221232 | 5.13E-15 | -2.63127 | 1 | 1 | AC012047.1  | -- |
| ENSG00000221233 | 5.13E-15 | -2.63127 | 1 | 1 | AC007842.1  | -- |
| ENSG00000221234 | 5.13E-15 | -2.63127 | 1 | 1 | AC009495.1  | -- |
| ENSG00000221235 | 5.13E-15 | -2.63127 | 1 | 1 | AC110813.1  | -- |
| ENSG00000221236 | 5.13E-15 | -2.63127 | 1 | 1 | AL137190.1  | -- |
| ENSG00000221237 | 5.13E-15 | -2.63127 | 1 | 1 | AC106736.1  | -- |
| ENSG00000221238 | 5.13E-15 | -2.63127 | 1 | 1 | MIR1285-2   | -- |
| ENSG00000221240 | 5.13E-15 | -2.63127 | 1 | 1 | MIR1258     | -- |
| ENSG00000221244 | 5.13E-15 | -2.63127 | 1 | 1 | AC116351.2  | -- |
| ENSG00000221245 | 5.13E-15 | -2.63127 | 1 | 1 | SNORA11     | -- |
| ENSG00000221246 | 5.13E-15 | -2.63127 | 1 | 1 | AC144522.1  | -- |
| ENSG00000221247 | 5.13E-15 | -2.63127 | 1 | 1 | AC136704.1  | -- |
| ENSG00000221249 | 5.13E-15 | -2.63127 | 1 | 1 | AC004980.1  | -- |
| ENSG00000221250 | 5.13E-15 | -2.63127 | 1 | 1 | AC120045.1  | -- |
| ENSG00000221251 | 5.13E-15 | -2.63127 | 1 | 1 | MIR1263     | -- |
| ENSG00000221252 | 5.13E-15 | -2.63127 | 1 | 1 | U3          | -- |
| ENSG00000221254 | 5.13E-15 | -2.63127 | 1 | 1 | AL163952.2  | -- |
| ENSG00000221255 | 5.13E-15 | -2.63127 | 1 | 1 | RNU6ATAC37P | -- |
| ENSG00000221257 | 5.13E-15 | -2.63127 | 1 | 1 | AC012175.1  | -- |
| ENSG00000221258 | 5.13E-15 | -2.63127 | 1 | 1 | AC011465.1  | -- |
| ENSG00000221259 | 5.13E-15 | -2.63127 | 1 | 1 | AC002978.1  | -- |
| ENSG00000221260 | 5.13E-15 | -2.63127 | 1 | 1 | AC083810.1  | -- |
| ENSG00000221262 | 5.13E-15 | -2.63127 | 1 | 1 | AC005159.1  | -- |
| ENSG00000221263 | 5.13E-15 | -2.63127 | 1 | 1 | MIR548P     | -- |
| ENSG00000221264 | 5.13E-15 | -2.63127 | 1 | 1 | MIR1284     | -- |
| ENSG00000221265 | 5.13E-15 | -2.63127 | 1 | 1 | MIR1255A    | -- |
| ENSG00000221266 | 5.13E-15 | -2.63127 | 1 | 1 | AC044860.1  | -- |
| ENSG00000221267 | 5.13E-15 | -2.63127 | 1 | 1 | MIR1236     | -- |
| ENSG00000221269 | 5.13E-15 | -2.63127 | 1 | 1 | MIR1302-8   | -- |
| ENSG00000221270 | 5.13E-15 | -2.63127 | 1 | 1 | AC130888.1  | -- |
| ENSG00000221273 | 5.13E-15 | -2.63127 | 1 | 1 | MIR1237     | -- |
| ENSG00000221275 | 5.13E-15 | -2.63127 | 1 | 1 | MIR548I2    | -- |
| ENSG00000221278 | 5.13E-15 | -2.63127 | 1 | 1 | AC003658.1  | -- |
| ENSG00000221279 | 5.13E-15 | -2.63127 | 1 | 1 | AC005161.1  | -- |
| ENSG00000221280 | 5.13E-15 | -2.63127 | 1 | 1 | AC026366.1  | -- |
| ENSG00000221281 | 5.13E-15 | -2.63127 | 1 | 1 | AC002485.1  | -- |
| ENSG00000221286 | 5.13E-15 | -2.63127 | 1 | 1 | AC092289.1  | -- |
| ENSG00000221287 | 5.13E-15 | -2.63127 | 1 | 1 | MIR1289-2   | -- |
| ENSG00000221288 | 5.13E-15 | -2.63127 | 1 | 1 | MIR663B     | -- |
| ENSG00000221289 | 5.13E-15 | -2.63127 | 1 | 1 | AC013406.1  | -- |
| ENSG00000221290 | 5.13E-15 | -2.63127 | 1 | 1 | MIR1182     | -- |
| ENSG00000221291 | 5.13E-15 | -2.63127 | 1 | 1 | AC090660.1  | -- |
| ENSG00000221293 | 5.13E-15 | -2.63127 | 1 | 1 | AC009987.1  | -- |
| ENSG00000221294 | 5.13E-15 | -2.63127 | 1 | 1 | AL021394.1  | -- |
| ENSG00000221295 | 5.13E-15 | -2.63127 | 1 | 1 | AC134698.1  | -- |
| ENSG00000221296 | 5.13E-15 | -2.63127 | 1 | 1 | MIR548T     | -- |
| ENSG00000221297 | 5.13E-15 | -2.63127 | 1 | 1 | AL590708.1  | -- |
| ENSG00000221300 | 5.13E-15 | -2.63127 | 1 | 1 | SNORD75     | -- |
| ENSG00000221301 | 5.13E-15 | -2.63127 | 1 | 1 | AC116562.1  | -- |
| ENSG00000221302 | 5.13E-15 | -2.63127 | 1 | 1 | AC018628.1  | -- |
| ENSG00000221303 | 5.13E-15 | -2.63127 | 1 | 1 | SNORA79     | -- |
| ENSG00000221304 | 5.13E-15 | -2.63127 | 1 | 1 | AC068706.1  | -- |



|                 |          |          |   |               |    |
|-----------------|----------|----------|---|---------------|----|
| ENSG00000221305 | 5.13E-15 | -2.63127 | 1 | 1 MIR548I3    | -- |
| ENSG00000221307 | 5.13E-15 | -2.63127 | 1 | 1 AC092745.1  | -- |
| ENSG00000221309 | 5.13E-15 | -2.63127 | 1 | 1 AC091167.1  | -- |
| ENSG00000221310 | 5.13E-15 | -2.63127 | 1 | 1 AC008967.1  | -- |
| ENSG00000221312 | 5.13E-15 | -2.63127 | 1 | 1 AL109922.1  | -- |
| ENSG00000221313 | 5.13E-15 | -2.63127 | 1 | 1 AC010207.1  | -- |
| ENSG00000221314 | 5.13E-15 | -2.63127 | 1 | 1 AC093700.1  | -- |
| ENSG00000221316 | 5.13E-15 | -2.63127 | 1 | 1 AL445204.1  | -- |
| ENSG00000221317 | 5.13E-15 | -2.63127 | 1 | 1 AL513487.1  | -- |
| ENSG00000221318 | 5.13E-15 | -2.63127 | 1 | 1 AC135983.1  | -- |
| ENSG00000221319 | 5.13E-15 | -2.63127 | 1 | 1 AL441988.1  | -- |
| ENSG00000221320 | 5.13E-15 | -2.63127 | 1 | 1 AC023385.1  | -- |
| ENSG00000221321 | 5.13E-15 | -2.63127 | 1 | 1 AC016764.1  | -- |
| ENSG00000221322 | 5.13E-15 | -2.63127 | 1 | 1 AC116533.1  | -- |
| ENSG00000221323 | 5.13E-15 | -2.63127 | 1 | 1 MIR1178     | -- |
| ENSG00000221324 | 5.13E-15 | -2.63127 | 1 | 1 AL590787.1  | -- |
| ENSG00000221325 | 5.13E-15 | -2.63127 | 1 | 1 MIR1200     | -- |
| ENSG00000221326 | 5.13E-15 | -2.63127 | 1 | 1 AL121652.1  | -- |
| ENSG00000221328 | 5.13E-15 | -2.63127 | 1 | 1 AL117333.1  | -- |
| ENSG00000221330 | 5.13E-15 | -2.63127 | 1 | 1 AC009159.1  | -- |
| ENSG00000221331 | 5.13E-15 | -2.63127 | 1 | 1 MIR548Q     | -- |
| ENSG00000221332 | 5.13E-15 | -2.63127 | 1 | 1 U3          | -- |
| ENSG00000221333 | 5.13E-15 | -2.63127 | 1 | 1 MIR548K     | -- |
| ENSG00000221334 | 5.13E-15 | -2.63127 | 1 | 1 AC119751.3  | -- |
| ENSG00000221335 | 5.13E-15 | -2.63127 | 1 | 1 AP000745.1  | -- |
| ENSG00000221336 | 5.13E-15 | -2.63127 | 1 | 1 AL356137.1  | -- |
| ENSG00000221337 | 5.13E-15 | -2.63127 | 1 | 1 AC099537.1  | -- |
| ENSG00000221343 | 5.13E-15 | -2.63127 | 1 | 1 AC010422.1  | -- |
| ENSG00000221344 | 5.13E-15 | -2.63127 | 1 | 1 AC068946.1  | -- |
| ENSG00000221345 | 5.13E-15 | -2.63127 | 1 | 1 U3          | -- |
| ENSG00000221346 | 5.13E-15 | -2.63127 | 1 | 1 AL356458.1  | -- |
| ENSG00000221347 | 5.13E-15 | -2.63127 | 1 | 1 AC096649.4  | -- |
| ENSG00000221348 | 5.13E-15 | -2.63127 | 1 | 1 MIR548F5    | -- |
| ENSG00000221351 | 5.13E-15 | -2.63127 | 1 | 1 AC068570.1  | -- |
| ENSG00000221352 | 5.13E-15 | -2.63127 | 1 | 1 AL356214.1  | -- |
| ENSG00000221354 | 5.13E-15 | -2.63127 | 1 | 1 AC131280.1  | -- |
| ENSG00000221355 | 5.13E-15 | -2.63127 | 1 | 1 MIR1288     | -- |
| ENSG00000221356 | 5.13E-15 | -2.63127 | 1 | 1 AC004492.1  | -- |
| ENSG00000221357 | 5.13E-15 | -2.63127 | 1 | 1 AC104387.1  | -- |
| ENSG00000221358 | 5.13E-15 | -2.63127 | 1 | 1 AC026150.1  | -- |
| ENSG00000221359 | 5.13E-15 | -2.63127 | 1 | 1 AL355512.1  | -- |
| ENSG00000221362 | 5.13E-15 | -2.63127 | 1 | 1 AC106860.1  | -- |
| ENSG00000221363 | 5.13E-15 | -2.63127 | 1 | 1 RNU6ATAC20P | -- |
| ENSG00000221365 | 5.13E-15 | -2.63127 | 1 | 1 MIR1228     | -- |
| ENSG00000221366 | 5.13E-15 | -2.63127 | 1 | 1 MIR1306     | -- |
| ENSG00000221369 | 5.13E-15 | -2.63127 | 1 | 1 MIR548G     | -- |
| ENSG00000221371 | 5.13E-15 | -2.63127 | 1 | 1 MIR1265     | -- |
| ENSG00000221372 | 5.13E-15 | -2.63127 | 1 | 1 AC010739.1  | -- |
| ENSG00000221373 | 5.13E-15 | -2.63127 | 1 | 1 AC010297.1  | -- |
| ENSG00000221374 | 5.13E-15 | -2.63127 | 1 | 1 AC007242.1  | -- |
| ENSG00000221375 | 5.13E-15 | -2.63127 | 1 | 1 RNU6ATAC23P | -- |
| ENSG00000221376 | 5.13E-15 | -2.63127 | 1 | 1 SNORA77     | -- |
| ENSG00000221377 | 5.13E-15 | -2.63127 | 1 | 1 AC073255.1  | -- |
| ENSG00000221378 | 5.13E-15 | -2.63127 | 1 | 1 AL096864.1  | -- |
| ENSG00000221379 | 5.13E-15 | -2.63127 | 1 | 1 AC004460.1  | -- |
| ENSG00000221380 | 5.13E-15 | -2.63127 | 1 | 1 AC108696.1  | -- |
| ENSG00000221381 | 5.13E-15 | -2.63127 | 1 | 1 SNORD88B    | -- |
| ENSG00000221382 | 5.13E-15 | -2.63127 | 1 | 1 AC096971.1  | -- |

|                 |          |          |   |               |    |
|-----------------|----------|----------|---|---------------|----|
| ENSG00000221383 | 5.13E-15 | -2.63127 | 1 | 1 AC016907.1  | -- |
| ENSG00000221384 | 5.13E-15 | -2.63127 | 1 | 1 AC023798.1  | -- |
| ENSG00000221385 | 5.13E-15 | -2.63127 | 1 | 1 AL354984.2  | -- |
| ENSG00000221386 | 5.13E-15 | -2.63127 | 1 | 1 AC002979.1  | -- |
| ENSG00000221388 | 5.13E-15 | -2.63127 | 1 | 1 AC093865.1  | -- |
| ENSG00000221389 | 5.13E-15 | -2.63127 | 1 | 1 AC010754.1  | -- |
| ENSG00000221390 | 5.13E-15 | -2.63127 | 1 | 1 MIR1295A    | -- |
| ENSG00000221391 | 5.13E-15 | -2.63127 | 1 | 1 AC013489.1  | -- |
| ENSG00000221392 | 5.13E-15 | -2.63127 | 1 | 1 Z73964.1    | -- |
| ENSG00000221393 | 5.13E-15 | -2.63127 | 1 | 1 MIR1302-6   | -- |
| ENSG00000221394 | 5.13E-15 | -2.63127 | 1 | 1 MIR1229     | -- |
| ENSG00000221395 | 5.13E-15 | -2.63127 | 1 | 1 AC099506.1  | -- |
| ENSG00000221396 | 5.13E-15 | -2.63127 | 1 | 1 AF064863.1  | -- |
| ENSG00000221398 | 5.13E-15 | -2.63127 | 1 | 1 SNORA11     | -- |
| ENSG00000221400 | 5.13E-15 | -2.63127 | 1 | 1 U3          | -- |
| ENSG00000221401 | 5.13E-15 | -2.63127 | 1 | 1 AC025594.1  | -- |
| ENSG00000221402 | 5.13E-15 | -2.63127 | 1 | 1 AL353664.1  | -- |
| ENSG00000221403 | 5.13E-15 | -2.63127 | 1 | 1 AC096633.1  | -- |
| ENSG00000221405 | 5.13E-15 | -2.63127 | 1 | 1 AC123768.2  | -- |
| ENSG00000221407 | 5.13E-15 | -2.63127 | 1 | 1 U85056.4    | -- |
| ENSG00000221409 | 5.13E-15 | -2.63127 | 1 | 1 AC068506.1  | -- |
| ENSG00000221410 | 5.13E-15 | -2.63127 | 1 | 1 MIR1238     | -- |
| ENSG00000221411 | 5.13E-15 | -2.63127 | 1 | 1 MIR1227     | -- |
| ENSG00000221412 | 5.13E-15 | -2.63127 | 1 | 1 AC124861.2  | -- |
| ENSG00000221413 | 5.13E-15 | -2.63127 | 1 | 1 AC023593.1  | -- |
| ENSG00000221415 | 5.13E-15 | -2.63127 | 1 | 1 AC118282.1  | -- |
| ENSG00000221416 | 5.13E-15 | -2.63127 | 1 | 1 AL133232.1  | -- |
| ENSG00000221417 | 5.13E-15 | -2.63127 | 1 | 1 MIR1257     | -- |
| ENSG00000221418 | 5.13E-15 | -2.63127 | 1 | 1 AC003968.1  | -- |
| ENSG00000221419 | 5.13E-15 | -2.63127 | 1 | 1 MIR1287     | -- |
| ENSG00000221420 | 5.13E-15 | -2.63127 | 1 | 1 SNORA81     | -- |
| ENSG00000221421 | 5.13E-15 | -2.63127 | 1 | 1 MIR1283-1   | -- |
| ENSG00000221423 | 5.13E-15 | -2.63127 | 1 | 1 AL031602.1  | -- |
| ENSG00000221424 | 5.13E-15 | -2.63127 | 1 | 1 AC090954.1  | -- |
| ENSG00000221425 | 5.13E-15 | -2.63127 | 1 | 1 AL157904.1  | -- |
| ENSG00000221427 | 5.13E-15 | -2.63127 | 1 | 1 AL121819.1  | -- |
| ENSG00000221428 | 5.13E-15 | -2.63127 | 1 | 1 AC006150.2  | -- |
| ENSG00000221430 | 5.13E-15 | -2.63127 | 1 | 1 MIR1294     | -- |
| ENSG00000221431 | 5.13E-15 | -2.63127 | 1 | 1 AC092925.1  | -- |
| ENSG00000221432 | 5.13E-15 | -2.63127 | 1 | 1 AC079834.2  | -- |
| ENSG00000221434 | 5.13E-15 | -2.63127 | 1 | 1 AL132671.1  | -- |
| ENSG00000221436 | 5.13E-15 | -2.63127 | 1 | 1 MIR548F3    | -- |
| ENSG00000221437 | 5.13E-15 | -2.63127 | 1 | 1 AC068058.1  | -- |
| ENSG00000221438 | 5.13E-15 | -2.63127 | 1 | 1 AC114877.1  | -- |
| ENSG00000221440 | 5.13E-15 | -2.63127 | 1 | 1 RNU6ATAC31P | -- |
| ENSG00000221442 | 5.13E-15 | -2.63127 | 1 | 1 MIR548F4    | -- |
| ENSG00000221443 | 5.13E-15 | -2.63127 | 1 | 1 AC017083.3  | -- |
| ENSG00000221444 | 5.13E-15 | -2.63127 | 1 | 1 AC139426.1  | -- |
| ENSG00000221445 | 5.13E-15 | -2.63127 | 1 | 1 MIR1301     | -- |
| ENSG00000221446 | 5.13E-15 | -2.63127 | 1 | 1 AC099805.1  | -- |
| ENSG00000221447 | 5.13E-15 | -2.63127 | 1 | 1 AL591415.1  | -- |
| ENSG00000221448 | 5.13E-15 | -2.63127 | 1 | 1 AL118509.1  | -- |
| ENSG00000221449 | 5.13E-15 | -2.63127 | 1 | 1 AL109618.1  | -- |
| ENSG00000221450 | 5.13E-15 | -2.63127 | 1 | 1 AL589675.1  | -- |
| ENSG00000221451 | 5.13E-15 | -2.63127 | 1 | 1 AL354984.3  | -- |
| ENSG00000221454 | 5.13E-15 | -2.63127 | 1 | 1 AC005631.1  | -- |
| ENSG00000221455 | 5.13E-15 | -2.63127 | 1 | 1 U3          | -- |
| ENSG00000221456 | 5.13E-15 | -2.63127 | 1 | 1 MIR1202     | -- |

|                 |          |          |   |               |    |
|-----------------|----------|----------|---|---------------|----|
| ENSG00000221457 | 5.13E-15 | -2.63127 | 1 | 1 AC092958.1  | -- |
| ENSG00000221458 | 5.13E-15 | -2.63127 | 1 | 1 AP003498.1  | -- |
| ENSG00000221459 | 5.13E-15 | -2.63127 | 1 | 1 SNORA11C    | -- |
| ENSG00000221461 | 5.13E-15 | -2.63127 | 1 | 1 U3          | -- |
| ENSG00000221463 | 5.13E-15 | -2.63127 | 1 | 1 MIR1277     | -- |
| ENSG00000221464 | 5.13E-15 | -2.63127 | 1 | 1 MIR1271     | -- |
| ENSG00000221465 | 5.13E-15 | -2.63127 | 1 | 1 AL162502.1  | -- |
| ENSG00000221466 | 5.13E-15 | -2.63127 | 1 | 1 MIR548AJ2   | -- |
| ENSG00000221467 | 5.13E-15 | -2.63127 | 1 | 1 AC132803.1  | -- |
| ENSG00000221468 | 5.13E-15 | -2.63127 | 1 | 1 RNU6ATAC11P | -- |
| ENSG00000221469 | 5.13E-15 | -2.63127 | 1 | 1 AL133260.1  | -- |
| ENSG00000221470 | 5.13E-15 | -2.63127 | 1 | 1 AL132875.1  | -- |
| ENSG00000221471 | 5.13E-15 | -2.63127 | 1 | 1 AC098847.1  | -- |
| ENSG00000221473 | 5.13E-15 | -2.63127 | 1 | 1 AL138710.1  | -- |
| ENSG00000221474 | 5.13E-15 | -2.63127 | 1 | 1 AC068754.1  | -- |
| ENSG00000221475 | 5.13E-15 | -2.63127 | 1 | 1 SNORA11D    | -- |
| ENSG00000221476 | 5.13E-15 | -2.63127 | 1 | 1 MIR1827     | -- |
| ENSG00000221477 | 5.13E-15 | -2.63127 | 1 | 1 AC108739.1  | -- |
| ENSG00000221478 | 5.13E-15 | -2.63127 | 1 | 1 AC092329.1  | -- |
| ENSG00000221479 | 5.13E-15 | -2.63127 | 1 | 1 MIR1251     | -- |
| ENSG00000221484 | 5.13E-15 | -2.63127 | 1 | 1 AC027807.1  | -- |
| ENSG00000221486 | 5.13E-15 | -2.63127 | 1 | 1 AC000003.1  | -- |
| ENSG00000221488 | 5.13E-15 | -2.63127 | 1 | 1 AC092017.1  | -- |
| ENSG00000221489 | 5.13E-15 | -2.63127 | 1 | 1 AC007358.1  | -- |
| ENSG00000221492 | 5.13E-15 | -2.63127 | 1 | 1 AL162430.1  | -- |
| ENSG00000221493 | 5.13E-15 | -2.63127 | 1 | 1 MIR320C1    | -- |
| ENSG00000221494 | 5.13E-15 | -2.63127 | 1 | 1 MIR548I4    | -- |
| ENSG00000221495 | 5.13E-15 | -2.63127 | 1 | 1 AC098680.1  | -- |
| ENSG00000221496 | 5.13E-15 | -2.63127 | 1 | 1 U3          | -- |
| ENSG00000221497 | 5.13E-15 | -2.63127 | 1 | 1 AL034449.1  | -- |
| ENSG00000221498 | 5.13E-15 | -2.63127 | 1 | 1 SNORA77     | -- |
| ENSG00000221499 | 5.13E-15 | -2.63127 | 1 | 1 AC078881.1  | -- |
| ENSG00000221502 | 5.13E-15 | -2.63127 | 1 | 1 MIR1245A    | -- |
| ENSG00000221504 | 5.13E-15 | -2.63127 | 1 | 1 AC011456.1  | -- |
| ENSG00000221505 | 5.13E-15 | -2.63127 | 1 | 1 AL030997.1  | -- |
| ENSG00000221506 | 5.13E-15 | -2.63127 | 1 | 1 AC092038.1  | -- |
| ENSG00000221507 | 5.13E-15 | -2.63127 | 1 | 1 RNU6ATAC40P | -- |
| ENSG00000221510 | 5.13E-15 | -2.63127 | 1 | 1 MIR548O     | -- |
| ENSG00000221511 | 5.13E-15 | -2.63127 | 1 | 1 AC090825.1  | -- |
| ENSG00000221514 | 5.13E-15 | -2.63127 | 1 | 1 SNORD111B   | -- |
| ENSG00000221515 | 5.13E-15 | -2.63127 | 1 | 1 AC007333.1  | -- |
| ENSG00000221516 | 5.13E-15 | -2.63127 | 1 | 1 AP002806.1  | -- |
| ENSG00000221517 | 5.13E-15 | -2.63127 | 1 | 1 AC010724.1  | -- |
| ENSG00000221518 | 5.13E-15 | -2.63127 | 1 | 1 RNU6ATAC16P | -- |
| ENSG00000221519 | 5.13E-15 | -2.63127 | 1 | 1 AL390071.1  | -- |
| ENSG00000221521 | 5.13E-15 | -2.63127 | 1 | 1 AL158151.2  | -- |
| ENSG00000221523 | 5.13E-15 | -2.63127 | 1 | 1 AC079080.1  | -- |
| ENSG00000221524 | 5.13E-15 | -2.63127 | 1 | 1 AC074391.2  | -- |
| ENSG00000221525 | 5.13E-15 | -2.63127 | 1 | 1 MIR1185-1   | -- |
| ENSG00000221526 | 5.13E-15 | -2.63127 | 1 | 1 AC040162.1  | -- |
| ENSG00000221527 | 5.13E-15 | -2.63127 | 1 | 1 RNU6ATAC41P | -- |
| ENSG00000221528 | 5.13E-15 | -2.63127 | 1 | 1 AC016597.1  | -- |
| ENSG00000221529 | 5.13E-15 | -2.63127 | 1 | 1 AC105227.1  | -- |
| ENSG00000221530 | 5.13E-15 | -2.63127 | 1 | 1 AC005037.2  | -- |
| ENSG00000221531 | 5.13E-15 | -2.63127 | 1 | 1 AC074091.1  | -- |
| ENSG00000221532 | 5.13E-15 | -2.63127 | 1 | 1 AC007353.1  | -- |
| ENSG00000221533 | 5.13E-15 | -2.63127 | 1 | 1 MIR1184-1   | -- |
| ENSG00000221534 | 5.13E-15 | -2.63127 | 1 | 1 AC090079.1  | -- |

|                 |          |          |   |               |    |
|-----------------|----------|----------|---|---------------|----|
| ENSG00000221535 | 5.13E-15 | -2.63127 | 1 | 1 AC027319.1  | -- |
| ENSG00000221536 | 5.13E-15 | -2.63127 | 1 | 1 AC091643.1  | -- |
| ENSG00000221537 | 5.13E-15 | -2.63127 | 1 | 1 MIR548H1    | -- |
| ENSG00000221538 | 5.13E-15 | -2.63127 | 1 | 1 AL365361.1  | -- |
| ENSG00000221541 | 5.13E-15 | -2.63127 | 1 | 1 AC079753.1  | -- |
| ENSG00000221542 | 5.13E-15 | -2.63127 | 1 | 1 AC016405.2  | -- |
| ENSG00000221544 | 5.13E-15 | -2.63127 | 1 | 1 AL359709.1  | -- |
| ENSG00000221545 | 5.13E-15 | -2.63127 | 1 | 1 MIR1255B2   | -- |
| ENSG00000221547 | 5.13E-15 | -2.63127 | 1 | 1 AL359853.1  | -- |
| ENSG00000221548 | 5.13E-15 | -2.63127 | 1 | 1 MIR1283-2   | -- |
| ENSG00000221550 | 5.13E-15 | -2.63127 | 1 | 1 AL645859.1  | -- |
| ENSG00000221551 | 5.13E-15 | -2.63127 | 1 | 1 AP000478.1  | -- |
| ENSG00000221552 | 5.13E-15 | -2.63127 | 1 | 1 MIR1303     | -- |
| ENSG00000221553 | 5.13E-15 | -2.63127 | 1 | 1 AC004924.1  | -- |
| ENSG00000221556 | 5.13E-15 | -2.63127 | 1 | 1 AC103794.1  | -- |
| ENSG00000221558 | 5.13E-15 | -2.63127 | 1 | 1 AC024082.1  | -- |
| ENSG00000221559 | 5.13E-15 | -2.63127 | 1 | 1 AL357519.1  | -- |
| ENSG00000221560 | 5.13E-15 | -2.63127 | 1 | 1 MIR1302-1   | -- |
| ENSG00000221561 | 5.13E-15 | -2.63127 | 1 | 1 AC087069.1  | -- |
| ENSG00000221562 | 5.13E-15 | -2.63127 | 1 | 1 RNU6ATAC10P | -- |
| ENSG00000221563 | 5.13E-15 | -2.63127 | 1 | 1 MIR1269A    | -- |
| ENSG00000221564 | 5.13E-15 | -2.63127 | 1 | 1 RNU6ATAC42P | -- |
| ENSG00000221565 | 5.13E-15 | -2.63127 | 1 | 1 AP004242.1  | -- |
| ENSG00000221566 | 5.13E-15 | -2.63127 | 1 | 1 MIR1181     | -- |
| ENSG00000221567 | 5.13E-15 | -2.63127 | 1 | 1 AF228730.2  | -- |
| ENSG00000221568 | 5.13E-15 | -2.63127 | 1 | 1 AC026797.1  | -- |
| ENSG00000221573 | 5.13E-15 | -2.63127 | 1 | 1 AC099535.1  | -- |
| ENSG00000221574 | 5.13E-15 | -2.63127 | 1 | 1 RNU6ATAC33P | -- |
| ENSG00000221576 | 5.13E-15 | -2.63127 | 1 | 1 AC004543.1  | -- |
| ENSG00000221578 | 5.13E-15 | -2.63127 | 1 | 1 AL049798.1  | -- |
| ENSG00000221579 | 5.13E-15 | -2.63127 | 1 | 1 AC093162.1  | -- |
| ENSG00000221580 | 5.13E-15 | -2.63127 | 1 | 1 AC116553.1  | -- |
| ENSG00000221581 | 5.13E-15 | -2.63127 | 1 | 1 AL353707.1  | -- |
| ENSG00000221583 | 5.13E-15 | -2.63127 | 1 | 1 RNU6ATAC21P | -- |
| ENSG00000221584 | 5.13E-15 | -2.63127 | 1 | 1 AC008747.1  | -- |
| ENSG00000221585 | 5.13E-15 | -2.63127 | 1 | 1 MIR1226     | -- |
| ENSG00000221586 | 5.13E-15 | -2.63127 | 1 | 1 MIR1261     | -- |
| ENSG00000221589 | 5.13E-15 | -2.63127 | 1 | 1 AC100817.1  | -- |
| ENSG00000221590 | 5.13E-15 | -2.63127 | 1 | 1 AC009299.1  | -- |
| ENSG00000221591 | 5.13E-15 | -2.63127 | 1 | 1 AL161740.1  | -- |
| ENSG00000221593 | 5.13E-15 | -2.63127 | 1 | 1 AC026150.2  | -- |
| ENSG00000221594 | 5.13E-15 | -2.63127 | 1 | 1 MIR548F1    | -- |
| ENSG00000221595 | 5.13E-15 | -2.63127 | 1 | 1 AC010458.1  | -- |
| ENSG00000221599 | 5.13E-15 | -2.63127 | 1 | 1 AL136446.1  | -- |
| ENSG00000221601 | 5.13E-15 | -2.63127 | 1 | 1 RNU4ATAC2P  | -- |
| ENSG00000221602 | 5.13E-15 | -2.63127 | 1 | 1 AC133041.1  | -- |
| ENSG00000221603 | 5.13E-15 | -2.63127 | 1 | 1 MIR1184-2   | -- |
| ENSG00000221604 | 5.13E-15 | -2.63127 | 1 | 1 MIR1293     | -- |
| ENSG00000221606 | 5.13E-15 | -2.63127 | 1 | 1 AL356131.1  | -- |
| ENSG00000221607 | 5.13E-15 | -2.63127 | 1 | 1 AP005718.1  | -- |
| ENSG00000221608 | 5.13E-15 | -2.63127 | 1 | 1 AC079235.1  | -- |
| ENSG00000221610 | 5.13E-15 | -2.63127 | 1 | 1 AC107890.1  | -- |
| ENSG00000221611 | 5.13E-15 | -2.63127 | 1 | 1 SNORD88     | -- |
| ENSG00000221612 | 5.13E-15 | -2.63127 | 1 | 1 AC106775.1  | -- |
| ENSG00000221613 | 5.13E-15 | -2.63127 | 1 | 1 AL161452.1  | -- |
| ENSG00000221614 | 5.13E-15 | -2.63127 | 1 | 1 MIR1185-2   | -- |
| ENSG00000221615 | 5.13E-15 | -2.63127 | 1 | 1 AC140132.1  | -- |
| ENSG00000221616 | 5.13E-15 | -2.63127 | 1 | 1 MIR548H4    | -- |

|                 |          |          |   |              |    |
|-----------------|----------|----------|---|--------------|----|
| ENSG00000221617 | 5.13E-15 | -2.63127 | 1 | 1 AC138123.1 | -- |
| ENSG00000221618 | 5.13E-15 | -2.63127 | 1 | 1 AC093817.1 | -- |
| ENSG00000221619 | 5.13E-15 | -2.63127 | 1 | 1 AC012671.3 | -- |
| ENSG00000221621 | 5.13E-15 | -2.63127 | 1 | 1 AC009835.1 | -- |
| ENSG00000221623 | 5.13E-15 | -2.63127 | 1 | 1 AC090150.1 | -- |
| ENSG00000221628 | 5.13E-15 | -2.63127 | 1 | 1 MIR1302-4  | -- |
| ENSG00000221629 | 5.13E-15 | -2.63127 | 1 | 1 AL162614.1 | -- |
| ENSG00000221630 | 5.13E-15 | -2.63127 | 1 | 1 MIR1179    | -- |
| ENSG00000221631 | 5.13E-15 | -2.63127 | 1 | 1 AP000897.1 | -- |
| ENSG00000221633 | 5.13E-15 | -2.63127 | 1 | 1 U3         | -- |
| ENSG00000221634 | 5.13E-15 | -2.63127 | 1 | 1 MIR1276    | -- |
| ENSG00000221635 | 5.13E-15 | -2.63127 | 1 | 1 BX255972.1 | -- |
| ENSG00000221637 | 5.13E-15 | -2.63127 | 1 | 1 AC105252.1 | -- |
| ENSG00000221638 | 5.13E-15 | -2.63127 | 1 | 1 U3         | -- |
| ENSG00000221639 | 5.13E-15 | -2.63127 | 1 | 1 SNORA3     | -- |
| ENSG00000221641 | 5.13E-15 | -2.63127 | 1 | 1 MIR1268A   | -- |
| ENSG00000221644 | 5.13E-15 | -2.63127 | 1 | 1 AC027238.1 | -- |
| ENSG00000221645 | 5.13E-15 | -2.63127 | 1 | 1 AL157791.1 | -- |
| ENSG00000221649 | 5.13E-15 | -2.63127 | 1 | 1 MIR1233-1  | -- |
| ENSG00000221650 | 5.13E-15 | -2.63127 | 1 | 1 MIR1267    | -- |
| ENSG00000221653 | 5.13E-15 | -2.63127 | 1 | 1 AC007131.3 | -- |
| ENSG00000221654 | 5.13E-15 | -2.63127 | 1 | 1 AC013402.1 | -- |
| ENSG00000221655 | 5.13E-15 | -2.63127 | 1 | 1 AL354978.1 | -- |
| ENSG00000221656 | 5.13E-15 | -2.63127 | 1 | 1 MIR1225    | -- |
| ENSG00000221657 | 5.13E-15 | -2.63127 | 1 | 1 AC097455.1 | -- |
| ENSG00000221659 | 5.13E-15 | -2.63127 | 1 | 1 AC104441.1 | -- |
| ENSG00000221660 | 5.13E-15 | -2.63127 | 1 | 1 AC022861.1 | -- |
| ENSG00000221662 | 5.13E-15 | -2.63127 | 1 | 1 MIR1290    | -- |
| ENSG00000221664 | 5.13E-15 | -2.63127 | 1 | 1 AC095030.1 | -- |
| ENSG00000221665 | 5.13E-15 | -2.63127 | 1 | 1 AL591708.1 | -- |
| ENSG00000221667 | 5.13E-15 | -2.63127 | 1 | 1 MIR1825    | -- |
| ENSG00000221669 | 5.13E-15 | -2.63127 | 1 | 1 MIR548N    | -- |
| ENSG00000221670 | 5.13E-15 | -2.63127 | 1 | 1 AL596092.1 | -- |
| ENSG00000221672 | 5.13E-15 | -2.63127 | 1 | 1 Z97351.1   | -- |
| ENSG00000221673 | 5.13E-15 | -2.63127 | 1 | 1 U3         | -- |
| ENSG00000221676 | 5.13E-15 | -2.63127 | 1 | 1 RNU6ATAC   | -- |
| ENSG00000221677 | 5.13E-15 | -2.63127 | 1 | 1 AL161898.1 | -- |
| ENSG00000221679 | 5.13E-15 | -2.63127 | 1 | 1 AC087237.1 | -- |
| ENSG00000221680 | 5.13E-15 | -2.63127 | 1 | 1 MIR1278    | -- |
| ENSG00000221683 | 5.13E-15 | -2.63127 | 1 | 1 AC104837.1 | -- |
| ENSG00000221684 | 5.13E-15 | -2.63127 | 1 | 1 BX276092.1 | -- |
| ENSG00000221685 | 5.13E-15 | -2.63127 | 1 | 1 AL354775.1 | -- |
| ENSG00000221686 | 5.13E-15 | -2.63127 | 1 | 1 AC096579.1 | -- |
| ENSG00000221689 | 5.13E-15 | -2.63127 | 1 | 1 AC092646.3 | -- |
| ENSG00000221690 | 5.13E-15 | -2.63127 | 1 | 1 AC004875.1 | -- |
| ENSG00000221691 | 5.13E-15 | -2.63127 | 1 | 1 AC090825.2 | -- |
| ENSG00000221693 | 5.13E-15 | -2.63127 | 1 | 1 AL590226.1 | -- |
| ENSG00000221695 | 5.13E-15 | -2.63127 | 1 | 1 AL390335.1 | -- |
| ENSG00000221696 | 5.13E-15 | -2.63127 | 1 | 1 AL157884.1 | -- |
| ENSG00000221697 | 5.13E-15 | -2.63127 | 1 | 1 MIR1275    | -- |
| ENSG00000221698 | 5.13E-15 | -2.63127 | 1 | 1 MIR548H3   | -- |
| ENSG00000221699 | 5.13E-15 | -2.63127 | 1 | 1 AC024610.1 | -- |
| ENSG00000221701 | 5.13E-15 | -2.63127 | 1 | 1 AC005284.1 | -- |
| ENSG00000221702 | 5.13E-15 | -2.63127 | 1 | 1 AL356270.1 | -- |
| ENSG00000221703 | 5.13E-15 | -2.63127 | 1 | 1 MIR302E    | -- |
| ENSG00000221704 | 5.13E-15 | -2.63127 | 1 | 1 AC012305.1 | -- |
| ENSG00000221705 | 5.13E-15 | -2.63127 | 1 | 1 SNORA11E   | -- |
| ENSG00000221706 | 5.13E-15 | -2.63127 | 1 | 1 AC090573.1 | -- |

|                 |          |          |   |   |             |    |
|-----------------|----------|----------|---|---|-------------|----|
| ENSG00000221707 | 5.13E-15 | -2.63127 | 1 | 1 | AL592294.1  | -- |
| ENSG00000221708 | 5.13E-15 | -2.63127 | 1 | 1 | AL353733.1  | -- |
| ENSG00000221710 | 5.13E-15 | -2.63127 | 1 | 1 | MIR1298     | -- |
| ENSG00000221711 | 5.13E-15 | -2.63127 | 1 | 1 | SNORD75     | -- |
| ENSG00000221714 | 5.13E-15 | -2.63127 | 1 | 1 | AC130352.1  | -- |
| ENSG00000221717 | 5.13E-15 | -2.63127 | 1 | 1 | AL583860.1  | -- |
| ENSG00000221718 | 5.13E-15 | -2.63127 | 1 | 1 | AC046143.1  | -- |
| ENSG00000221719 | 5.13E-15 | -2.63127 | 1 | 1 | SNORA3      | -- |
| ENSG00000221720 | 5.13E-15 | -2.63127 | 1 | 1 | AC096951.1  | -- |
| ENSG00000221721 | 5.13E-15 | -2.63127 | 1 | 1 | AC010455.1  | -- |
| ENSG00000221723 | 5.13E-15 | -2.63127 | 1 | 1 | AC019322.1  | -- |
| ENSG00000221724 | 5.13E-15 | -2.63127 | 1 | 1 | AC078855.1  | -- |
| ENSG00000221725 | 5.13E-15 | -2.63127 | 1 | 1 | RNU6ATAC25P | -- |
| ENSG00000221726 | 5.13E-15 | -2.63127 | 1 | 1 | AL031653.1  | -- |
| ENSG00000221729 | 5.13E-15 | -2.63127 | 1 | 1 | AL590285.1  | -- |
| ENSG00000221730 | 5.13E-15 | -2.63127 | 1 | 1 | AL162419.1  | -- |
| ENSG00000221731 | 5.13E-15 | -2.63127 | 1 | 1 | AC091321.1  | -- |
| ENSG00000221732 | 5.13E-15 | -2.63127 | 1 | 1 | AC006452.1  | -- |
| ENSG00000221733 | 5.13E-15 | -2.63127 | 1 | 1 | AL109843.1  | -- |
| ENSG00000221734 | 5.13E-15 | -2.63127 | 1 | 1 | AL390240.1  | -- |
| ENSG00000221736 | 5.13E-15 | -2.63127 | 1 | 1 | AC003681.1  | -- |
| ENSG00000221737 | 5.13E-15 | -2.63127 | 1 | 1 | MIR548I1    | -- |
| ENSG00000221739 | 5.13E-15 | -2.63127 | 1 | 1 | MIR1203     | -- |
| ENSG00000221741 | 5.13E-15 | -2.63127 | 1 | 1 | AC093304.1  | -- |
| ENSG00000221744 | 5.13E-15 | -2.63127 | 1 | 1 | AL512635.1  | -- |
| ENSG00000221745 | 5.13E-15 | -2.63127 | 1 | 1 | MIR1197     | -- |
| ENSG00000221746 | 5.13E-15 | -2.63127 | 1 | 1 | AL645730.1  | -- |
| ENSG00000221747 | 5.13E-15 | -2.63127 | 1 | 1 | AC118282.2  | -- |
| ENSG00000221748 | 5.13E-15 | -2.63127 | 1 | 1 | AL049647.1  | -- |
| ENSG00000221749 | 5.13E-15 | -2.63127 | 1 | 1 | AC107020.1  | -- |
| ENSG00000221750 | 5.13E-15 | -2.63127 | 1 | 1 | SNORA11     | -- |
| ENSG00000221751 | 5.13E-15 | -2.63127 | 1 | 1 | AC006380.1  | -- |
| ENSG00000221753 | 5.13E-15 | -2.63127 | 1 | 1 | MIR1273A    | -- |
| ENSG00000221754 | 5.13E-15 | -2.63127 | 1 | 1 | MIR1260A    | -- |
| ENSG00000221755 | 5.13E-15 | -2.63127 | 1 | 1 | MIR720      | -- |
| ENSG00000221756 | 5.13E-15 | -2.63127 | 1 | 1 | AL159977.1  | -- |
| ENSG00000221760 | 5.13E-15 | -2.63127 | 1 | 1 | MIR548J     | -- |
| ENSG00000221762 | 5.13E-15 | -2.63127 | 1 | 1 | AC092786.1  | -- |
| ENSG00000221763 | 5.13E-15 | -2.63127 | 1 | 1 | MIR1289-1   | -- |
| ENSG00000221764 | 5.13E-15 | -2.63127 | 1 | 1 | AC107068.1  | -- |
| ENSG00000221766 | 5.13E-15 | -2.63127 | 1 | 1 | AC084872.1  | -- |
| ENSG00000221767 | 5.13E-15 | -2.63127 | 1 | 1 | MIR1307     | -- |
| ENSG00000221768 | 5.13E-15 | -2.63127 | 1 | 1 | AL356309.1  | -- |
| ENSG00000221770 | 5.13E-15 | -2.63127 | 1 | 1 | AC010203.1  | -- |
| ENSG00000221771 | 5.13E-15 | -2.63127 | 1 | 1 | MIR1205     | -- |
| ENSG00000221772 | 5.13E-15 | -2.63127 | 1 | 1 | AL353141.1  | -- |
| ENSG00000221774 | 5.13E-15 | -2.63127 | 1 | 1 | AC016821.1  | -- |
| ENSG00000221777 | 5.13E-15 | -2.63127 | 1 | 1 | AL160056.1  | -- |
| ENSG00000221778 | 5.13E-15 | -2.63127 | 1 | 1 | AC034236.2  | -- |
| ENSG00000221779 | 5.13E-15 | -2.63127 | 1 | 1 | AL590403.1  | -- |
| ENSG00000221781 | 5.13E-15 | -2.63127 | 1 | 1 | AL359815.1  | -- |
| ENSG00000221782 | 5.13E-15 | -2.63127 | 1 | 1 | MIR548F2    | -- |
| ENSG00000221783 | 5.13E-15 | -2.63127 | 1 | 1 | MIR1183     | -- |
| ENSG00000221785 | 5.13E-15 | -2.63127 | 1 | 1 | AC120045.2  | -- |
| ENSG00000221786 | 5.13E-15 | -2.63127 | 1 | 1 | AC004673.1  | -- |
| ENSG00000221788 | 5.13E-15 | -2.63127 | 1 | 1 | MIR1252     | -- |
| ENSG00000221789 | 5.13E-15 | -2.63127 | 1 | 1 | AC130462.1  | -- |
| ENSG00000221790 | 5.13E-15 | -2.63127 | 1 | 1 | AC011467.1  | -- |

|                 |          |          |   |                 |        |
|-----------------|----------|----------|---|-----------------|--------|
| ENSG00000221792 | 5.13E-15 | -2.63127 | 1 | 1 MIR1282       | -      |
| ENSG00000221793 | 5.13E-15 | -2.63127 | 1 | 1 AC103863.1    | -      |
| ENSG00000221795 | 5.13E-15 | -2.63127 | 1 | 1 MIR1324       | -      |
| ENSG00000221796 | 5.13E-15 | -2.63127 | 1 | 1 AL356739.1    | -      |
| ENSG00000221798 | 5.13E-15 | -2.63127 | 1 | 1 AC092812.1    | -      |
| ENSG00000221799 | 5.13E-15 | -2.63127 | 1 | 1 AC132068.1    | -      |
| ENSG00000221801 | 5.13E-15 | -2.63127 | 1 | 1 MIR548H2      | -      |
| ENSG00000221802 | 5.13E-15 | -2.63127 | 1 | 1 MIR1234       | -      |
| ENSG00000221803 | 5.13E-15 | -2.63127 | 1 | 1 SNORD23       | -      |
| ENSG00000221804 | 5.13E-15 | -2.63127 | 1 | 1 AC021749.1    | -      |
| ENSG00000221806 | 5.13E-15 | -2.63127 | 1 | 1 RNU6ATAC34P   | -      |
| ENSG00000221807 | 5.13E-15 | -2.63127 | 1 | 1 AC069227.1    | -      |
| ENSG00000221808 | 5.13E-15 | -2.63127 | 1 | 1 MIR1256       | -      |
| ENSG00000221809 | 5.13E-15 | -2.63127 | 1 | 1 AC074051.1    | -      |
| ENSG00000221810 | 5.13E-15 | -2.63127 | 1 | 1 AC026781.1    | -      |
| ENSG00000221813 | 5.13E-15 | -2.63127 | 1 | 1 OR6B1         | K04257 |
| ENSG00000221818 | 5.13E-15 | -2.63127 | 1 | 1 EBF2          | K09103 |
| ENSG00000221836 | 5.13E-15 | -2.63127 | 1 | 1 OR2A5         | K04257 |
| ENSG00000221837 | 5.13E-15 | -2.63127 | 1 | 1 KRTAP10-9     | -      |
| ENSG00000221840 | 5.13E-15 | -2.63127 | 1 | 1 OR4A5         | K04257 |
| ENSG00000221844 | 5.13E-15 | -2.63127 | 1 | 1 RP11-404E6.1  | K01277 |
| ENSG00000221849 | 5.13E-15 | -2.63127 | 1 | 1 AC018880.1    | K09228 |
| ENSG00000221852 | 5.13E-15 | -2.63127 | 1 | 1 KRTAP1-5      | -      |
| ENSG00000221855 | 5.13E-15 | -2.63127 | 1 | 1 TAS2R41       | K08474 |
| ENSG00000221857 | 5.13E-15 | -2.63127 | 1 | 1 CTD-2527I21.4 | -      |
| ENSG00000221858 | 5.13E-15 | -2.63127 | 1 | 1 OR2A12        | K04257 |
| ENSG00000221859 | 5.13E-15 | -2.63127 | 1 | 1 KRTAP10-10    | -      |
| ENSG00000221864 | 5.13E-15 | -2.63127 | 1 | 1 KRTAP12-2     | -      |
| ENSG00000221866 | 5.13E-15 | -2.63127 | 1 | 1 PLXNA4        | K06820 |
| ENSG00000221870 | 5.13E-15 | -2.63127 | 1 | 1 TMEM257       | -      |
| ENSG00000221874 | 5.13E-15 | -2.63127 | 1 | 1 ZNF321P       | K09228 |
| ENSG00000221879 | 5.13E-15 | -2.63127 | 1 | 1 MRPS21P3      | K02970 |
| ENSG00000221880 | 5.13E-15 | -2.63127 | 1 | 1 KRTAP1-3      | -      |
| ENSG00000221882 | 5.13E-15 | -2.63127 | 1 | 1 OR3A2         | K04257 |
| ENSG00000221887 | 5.13E-15 | -2.63127 | 1 | 1 HMSD          | K13963 |
| ENSG00000221888 | 5.13E-15 | -2.63127 | 1 | 1 OR1C1         | K04257 |
| ENSG00000221891 | 5.13E-15 | -2.63127 | 1 | 1 FAM218BP      | -      |
| ENSG00000221900 | 5.13E-15 | -2.63127 | 1 | 1 POM121L12     | -      |
| ENSG00000221910 | 5.13E-15 | -2.63127 | 1 | 1 OR2F2         | K04257 |
| ENSG00000221923 | 5.13E-15 | -2.63127 | 1 | 1 ZNF880        | K09228 |
| ENSG00000221931 | 5.13E-15 | -2.63127 | 1 | 1 OR6X1         | K04257 |
| ENSG00000221932 | 5.13E-15 | -2.63127 | 1 | 1 HEPN1         | -      |
| ENSG00000221933 | 5.13E-15 | -2.63127 | 1 | 1 OR2A25        | K04257 |
| ENSG00000221938 | 5.13E-15 | -2.63127 | 1 | 1 OR2A14        | K04257 |
| ENSG00000221947 | 5.13E-15 | -2.63127 | 1 | 1 XKR9          | -      |
| ENSG00000221953 | 5.13E-15 | -2.63127 | 1 | 1 C1orf229      | K17985 |
| ENSG00000221954 | 5.13E-15 | -2.63127 | 1 | 1 OR4C12        | K04257 |
| ENSG00000221957 | 5.13E-15 | -2.63127 | 1 | 1 KIR2DS4       | K07981 |
| ENSG00000221961 | 5.13E-15 | -2.63127 | 1 | 1 PRR21         | -      |
| ENSG00000221962 | 5.13E-15 | -2.63127 | 1 | 1 TMEM14E       | -      |
| ENSG00000221970 | 5.13E-15 | -2.63127 | 1 | 1 OR2A1         | K04257 |
| ENSG00000221972 | 5.13E-15 | -2.63127 | 1 | 1 C3orf36       | -      |
| ENSG00000221977 | 5.13E-15 | -2.63127 | 1 | 1 OR4E2         | K04257 |
| ENSG00000221986 | 5.13E-15 | -2.63127 | 1 | 1 MYBPHL        | -      |
| ENSG00000221988 | 5.13E-15 | -2.63127 | 1 | 1 PPT2          | K01074 |
| ENSG00000221989 | 5.13E-15 | -2.63127 | 1 | 1 OR2A2         | K04257 |
| ENSG00000221994 | 5.13E-15 | -2.63127 | 1 | 1 ZNF630        | K09228 |
| ENSG00000221996 | 5.13E-15 | -2.63127 | 1 | 1 OR52B4        | K04257 |

|                 |          |          |   |              |        |
|-----------------|----------|----------|---|--------------|--------|
| ENSG00000222000 | 5.13E-15 | -2.63127 | 1 | 1 AC092675.3 | -      |
| ENSG00000222001 | 5.13E-15 | -2.63127 | 1 | 1 AC106876.2 | -      |
| ENSG00000222004 | 5.13E-15 | -2.63127 | 1 | 1 C7orf71    | K01974 |
| ENSG00000222007 | 5.13E-15 | -2.63127 | 1 | 1 AC064874.1 | -      |
| ENSG00000222012 | 5.13E-15 | -2.63127 | 1 | 1 AC005481.5 | -      |
| ENSG00000222014 | 5.13E-15 | -2.63127 | 1 | 1 RAB6C      | K07895 |
| ENSG00000222017 | 5.13E-15 | -2.63127 | 1 | 1 AC011997.1 | -      |
| ENSG00000222022 | 5.13E-15 | -2.63127 | 1 | 1 AC112721.1 | -      |
| ENSG00000222024 | 5.13E-15 | -2.63127 | 1 | 1 AC004945.1 | -      |
| ENSG00000222028 | 5.13E-15 | -2.63127 | 1 | 1 PSMB11     | K11598 |
| ENSG00000222030 | 5.13E-15 | -2.63127 | 1 | 1 AC007131.1 | -      |
| ENSG00000222031 | 5.13E-15 | -2.63127 | 1 | 1 AC023469.1 | -      |
| ENSG00000222032 | 5.13E-15 | -2.63127 | 1 | 1 AC112721.2 | -      |
| ENSG00000222033 | 5.13E-15 | -2.63127 | 1 | 1 LINC01124  | -      |
| ENSG00000222036 | 5.13E-15 | -2.63127 | 1 | 1 POTEK      | K17299 |
| ENSG00000222037 | 5.13E-15 | -2.63127 | 1 | 1 IGLC6      | K06554 |
| ENSG00000222038 | 5.13E-15 | -2.63127 | 1 | 1 POTEJ      | K17299 |
| ENSG00000222042 | 5.13E-15 | -2.63127 | 1 | 1 AP000233.4 | -      |
| ENSG00000222051 | 5.13E-15 | -2.63127 | 1 | 1 RNU6-1165P | -      |
| ENSG00000222054 | 5.13E-15 | -2.63127 | 1 | 1 RNA5SP177  | -      |
| ENSG00000222055 | 5.13E-15 | -2.63127 | 1 | 1 AC092117.1 | -      |
| ENSG00000222057 | 5.13E-15 | -2.63127 | 1 | 1 RNU4-62P   | -      |
| ENSG00000222064 | 5.13E-15 | -2.63127 | 1 | 1 AC108137.1 | -      |
| ENSG00000222066 | 5.13E-15 | -2.63127 | 1 | 1 AL163760.1 | -      |
| ENSG00000222067 | 5.13E-15 | -2.63127 | 1 | 1 RNU4-86P   | -      |
| ENSG00000222068 | 5.13E-15 | -2.63127 | 1 | 1 RN7SKP154  | -      |
| ENSG00000222070 | 5.13E-15 | -2.63127 | 1 | 1 AC010150.2 | -      |
| ENSG00000222072 | 5.13E-15 | -2.63127 | 1 | 1 Y_RNA      | -      |
| ENSG00000222076 | 5.13E-15 | -2.63127 | 1 | 1 RNU2-3P    | -      |
| ENSG00000222078 | 5.13E-15 | -2.63127 | 1 | 1 RN7SKP110  | -      |
| ENSG00000222079 | 5.13E-15 | -2.63127 | 1 | 1 AC020636.1 | -      |
| ENSG00000222080 | 5.13E-15 | -2.63127 | 1 | 1 AL356310.1 | -      |
| ENSG00000222084 | 5.13E-15 | -2.63127 | 1 | 1 AL445074.1 | -      |
| ENSG00000222085 | 5.13E-15 | -2.63127 | 1 | 1 AC024568.1 | -      |
| ENSG00000222086 | 5.13E-15 | -2.63127 | 1 | 1 AC010609.1 | -      |
| ENSG00000222087 | 5.13E-15 | -2.63127 | 1 | 1 RNU6-721P  | -      |
| ENSG00000222094 | 5.13E-15 | -2.63127 | 1 | 1 RNU2-65P   | -      |
| ENSG00000222095 | 5.13E-15 | -2.63127 | 1 | 1 SNORD113   | -      |
| ENSG00000222096 | 5.13E-15 | -2.63127 | 1 | 1 AC019051.1 | -      |
| ENSG00000222099 | 5.13E-15 | -2.63127 | 1 | 1 RN7SKP32   | -      |
| ENSG00000222101 | 5.13E-15 | -2.63127 | 1 | 1 AC091705.2 | -      |
| ENSG00000222102 | 5.13E-15 | -2.63127 | 1 | 1 RN7SKP232  | -      |
| ENSG00000222107 | 5.13E-15 | -2.63127 | 1 | 1 RN7SKP117  | -      |
| ENSG00000222108 | 5.13E-15 | -2.63127 | 1 | 1 RNA5SP317  | -      |
| ENSG00000222109 | 5.13E-15 | -2.63127 | 1 | 1 AC093515.1 | -      |
| ENSG00000222111 | 5.13E-15 | -2.63127 | 1 | 1 RN7SKP148  | -      |
| ENSG00000222112 | 5.13E-15 | -2.63127 | 1 | 1 RN7SKP16   | -      |
| ENSG00000222114 | 5.13E-15 | -2.63127 | 1 | 1 RNU6-985P  | -      |
| ENSG00000222117 | 5.13E-15 | -2.63127 | 1 | 1 AL391867.1 | -      |
| ENSG00000222118 | 5.13E-15 | -2.63127 | 1 | 1 RNA5SP487  | -      |
| ENSG00000222120 | 5.13E-15 | -2.63127 | 1 | 1 RNA5SP81   | -      |
| ENSG00000222122 | 5.13E-15 | -2.63127 | 1 | 1 RNU6-648P  | -      |
| ENSG00000222123 | 5.13E-15 | -2.63127 | 1 | 1 RNA5SP390  | -      |
| ENSG00000222126 | 5.13E-15 | -2.63127 | 1 | 1 RNU2-9P    | -      |
| ENSG00000222129 | 5.13E-15 | -2.63127 | 1 | 1 RNA5SP36   | -      |
| ENSG00000222133 | 5.13E-15 | -2.63127 | 1 | 1 AC003666.1 | -      |
| ENSG00000222139 | 5.13E-15 | -2.63127 | 1 | 1 RNU6-380P  | -      |
| ENSG00000222145 | 5.13E-15 | -2.63127 | 1 | 1 SNORA73    | -      |



|                 |          |          |   |              |    |
|-----------------|----------|----------|---|--------------|----|
| ENSG00000222146 | 5.13E-15 | -2.63127 | 1 | 1 RNU4-37P   | -- |
| ENSG00000222148 | 5.13E-15 | -2.63127 | 1 | 1 RNY4P30    | -- |
| ENSG00000222150 | 5.13E-15 | -2.63127 | 1 | 1 RNA5SP239  | -- |
| ENSG00000222152 | 5.13E-15 | -2.63127 | 1 | 1 RNU6-1166P | -- |
| ENSG00000222154 | 5.13E-15 | -2.63127 | 1 | 1 RN7SKP218  | -- |
| ENSG00000222158 | 5.13E-15 | -2.63127 | 1 | 1 AP003471.2 | -- |
| ENSG00000222160 | 5.13E-15 | -2.63127 | 1 | 1 Y_RNA      | -- |
| ENSG00000222161 | 5.13E-15 | -2.63127 | 1 | 1 Z97356.1   | -- |
| ENSG00000222162 | 5.13E-15 | -2.63127 | 1 | 1 RN7SKP151  | -- |
| ENSG00000222164 | 5.13E-15 | -2.63127 | 1 | 1 RN7SKP266  | -- |
| ENSG00000222168 | 5.13E-15 | -2.63127 | 1 | 1 Y_RNA      | -- |
| ENSG00000222169 | 5.13E-15 | -2.63127 | 1 | 1 AL162590.1 | -- |
| ENSG00000222170 | 5.13E-15 | -2.63127 | 1 | 1 RNU6-257P  | -- |
| ENSG00000222174 | 5.13E-15 | -2.63127 | 1 | 1 RN7SKP146  | -- |
| ENSG00000222178 | 5.13E-15 | -2.63127 | 1 | 1 RNA5SP181  | -- |
| ENSG00000222179 | 5.13E-15 | -2.63127 | 1 | 1 RN7SKP26   | -- |
| ENSG00000222182 | 5.13E-15 | -2.63127 | 1 | 1 RNA5SP156  | -- |
| ENSG00000222185 | 5.13E-15 | -2.63127 | 1 | 1 SNORD113   | -- |
| ENSG00000222192 | 5.13E-15 | -2.63127 | 1 | 1 Y_RNA      | -- |
| ENSG00000222196 | 5.13E-15 | -2.63127 | 1 | 1 AC121157.1 | -- |
| ENSG00000222197 | 5.13E-15 | -2.63127 | 1 | 1 AL359836.1 | -- |
| ENSG00000222202 | 5.13E-15 | -2.63127 | 1 | 1 RNU4-26P   | -- |
| ENSG00000222203 | 5.13E-15 | -2.63127 | 1 | 1 Y_RNA      | -- |
| ENSG00000222205 | 5.13E-15 | -2.63127 | 1 | 1 RNA5SP266  | -- |
| ENSG00000222206 | 5.13E-15 | -2.63127 | 1 | 1 Y_RNA      | -- |
| ENSG00000222207 | 5.13E-15 | -2.63127 | 1 | 1 RNA5SP407  | -- |
| ENSG00000222208 | 5.13E-15 | -2.63127 | 1 | 1 RNA5SP129  | -- |
| ENSG00000222209 | 5.13E-15 | -2.63127 | 1 | 1 RNA5SP56   | -- |
| ENSG00000222210 | 5.13E-15 | -2.63127 | 1 | 1 RN7SKP65   | -- |
| ENSG00000222213 | 5.13E-15 | -2.63127 | 1 | 1 RNU6-588P  | -- |
| ENSG00000222219 | 5.13E-15 | -2.63127 | 1 | 1 AC091736.1 | -- |
| ENSG00000222220 | 5.13E-15 | -2.63127 | 1 | 1 RN7SKP129  | -- |
| ENSG00000222222 | 5.13E-15 | -2.63127 | 1 | 1 RNU2-17P   | -- |
| ENSG00000222224 | 5.13E-15 | -2.63127 | 1 | 1 Y_RNA      | -- |
| ENSG00000222225 | 5.13E-15 | -2.63127 | 1 | 1 RNU6-447P  | -- |
| ENSG00000222226 | 5.13E-15 | -2.63127 | 1 | 1 AC006926.1 | -- |
| ENSG00000222230 | 5.13E-15 | -2.63127 | 1 | 1 RNA5SP158  | -- |
| ENSG00000222231 | 5.13E-15 | -2.63127 | 1 | 1 RNU2-54P   | -- |
| ENSG00000222232 | 5.13E-15 | -2.63127 | 1 | 1 RNA5SP89   | -- |
| ENSG00000222235 | 5.13E-15 | -2.63127 | 1 | 1 AL157392.1 | -- |
| ENSG00000222236 | 5.13E-15 | -2.63127 | 1 | 1 RNA5SP163  | -- |
| ENSG00000222238 | 5.13E-15 | -2.63127 | 1 | 1 RNU2-43P   | -- |
| ENSG00000222240 | 5.13E-15 | -2.63127 | 1 | 1 RN7SKP156  | -- |
| ENSG00000222244 | 5.13E-15 | -2.63127 | 1 | 1 RNA5SP431  | -- |
| ENSG00000222246 | 5.13E-15 | -2.63127 | 1 | 1 MIR1471    | -- |
| ENSG00000222248 | 5.13E-15 | -2.63127 | 1 | 1 RNA5SP201  | -- |
| ENSG00000222249 | 5.13E-15 | -2.63127 | 1 | 1 RNU6-262P  | -- |
| ENSG00000222251 | 5.13E-15 | -2.63127 | 1 | 1 RNA5SP95   | -- |
| ENSG00000222255 | 5.13E-15 | -2.63127 | 1 | 1 RNU6-101P  | -- |
| ENSG00000222257 | 5.13E-15 | -2.63127 | 1 | 1 RN7SKP199  | -- |
| ENSG00000222259 | 5.13E-15 | -2.63127 | 1 | 1 RN7SKP114  | -- |
| ENSG00000222262 | 5.13E-15 | -2.63127 | 1 | 1 AC092846.1 | -- |
| ENSG00000222266 | 5.13E-15 | -2.63127 | 1 | 1 RNU6-757P  | -- |
| ENSG00000222267 | 5.13E-15 | -2.63127 | 1 | 1 RNU6-892P  | -- |
| ENSG00000222268 | 5.13E-15 | -2.63127 | 1 | 1 RNA5SP425  | -- |
| ENSG00000222274 | 5.13E-15 | -2.63127 | 1 | 1 AC018690.1 | -- |
| ENSG00000222276 | 5.13E-15 | -2.63127 | 1 | 1 RNU2-33P   | -- |
| ENSG00000222281 | 5.13E-15 | -2.63127 | 1 | 1 RN7SKP111  | -- |

|                 |          |          |   |              |    |
|-----------------|----------|----------|---|--------------|----|
| ENSG00000222285 | 5.13E-15 | -2.63127 | 1 | 1 RNA5SP193  | -- |
| ENSG00000222287 | 5.13E-15 | -2.63127 | 1 | 1 RNU6-1043P | -- |
| ENSG00000222293 | 5.13E-15 | -2.63127 | 1 | 1 RNU2-36P   | -- |
| ENSG00000222296 | 5.13E-15 | -2.63127 | 1 | 1 Y_RNA      | -- |
| ENSG00000222297 | 5.13E-15 | -2.63127 | 1 | 1 RNU6-1156P | -- |
| ENSG00000222298 | 5.13E-15 | -2.63127 | 1 | 1 AL031655.2 | -- |
| ENSG00000222299 | 5.13E-15 | -2.63127 | 1 | 1 AC009142.1 | -- |
| ENSG00000222300 | 5.13E-15 | -2.63127 | 1 | 1 RNU2-21P   | -- |
| ENSG00000222302 | 5.13E-15 | -2.63127 | 1 | 1 RNA5SP371  | -- |
| ENSG00000222303 | 5.13E-15 | -2.63127 | 1 | 1 RNU6-935P  | -- |
| ENSG00000222305 | 5.13E-15 | -2.63127 | 1 | 1 Y_RNA      | -- |
| ENSG00000222308 | 5.13E-15 | -2.63127 | 1 | 1 RNA5SP198  | -- |
| ENSG00000222309 | 5.13E-15 | -2.63127 | 1 | 1 AL391839.1 | -- |
| ENSG00000222311 | 5.13E-15 | -2.63127 | 1 | 1 AC084882.1 | -- |
| ENSG00000222312 | 5.13E-15 | -2.63127 | 1 | 1 RNA5SP178  | -- |
| ENSG00000222313 | 5.13E-15 | -2.63127 | 1 | 1 RN7SKP267  | -- |
| ENSG00000222314 | 5.13E-15 | -2.63127 | 1 | 1 RNU6-1118P | -- |
| ENSG00000222316 | 5.13E-15 | -2.63127 | 1 | 1 AC008581.1 | -- |
| ENSG00000222317 | 5.13E-15 | -2.63127 | 1 | 1 RNA5SP118  | -- |
| ENSG00000222320 | 5.13E-15 | -2.63127 | 1 | 1 RNU6-1050P | -- |
| ENSG00000222321 | 5.13E-15 | -2.63127 | 1 | 1 MIR1912    | -- |
| ENSG00000222326 | 5.13E-15 | -2.63127 | 1 | 1 MIR1908    | -- |
| ENSG00000222327 | 5.13E-15 | -2.63127 | 1 | 1 RNU6-855P  | -- |
| ENSG00000222328 | 5.13E-15 | -2.63127 | 1 | 1 RNU2-2P    | -- |
| ENSG00000222329 | 5.13E-15 | -2.63127 | 1 | 1 RNU6-1076P | -- |
| ENSG00000222331 | 5.13E-15 | -2.63127 | 1 | 1 AC104434.1 | -- |
| ENSG00000222333 | 5.13E-15 | -2.63127 | 1 | 1 AC093680.1 | -- |
| ENSG00000222334 | 5.13E-15 | -2.63127 | 1 | 1 AC105242.1 | -- |
| ENSG00000222335 | 5.13E-15 | -2.63127 | 1 | 1 Y_RNA      | -- |
| ENSG00000222337 | 5.13E-15 | -2.63127 | 1 | 1 RN7SKP225  | -- |
| ENSG00000222338 | 5.13E-15 | -2.63127 | 1 | 1 RNU6-174P  | -- |
| ENSG00000222339 | 5.13E-15 | -2.63127 | 1 | 1 AP000807.2 | -- |
| ENSG00000222343 | 5.13E-15 | -2.63127 | 1 | 1 RN7SKP139  | -- |
| ENSG00000222344 | 5.13E-15 | -2.63127 | 1 | 1 RNU6-613P  | -- |
| ENSG00000222346 | 5.13E-15 | -2.63127 | 1 | 1 RNA5SP237  | -- |
| ENSG00000222348 | 5.13E-15 | -2.63127 | 1 | 1 RNU6-814P  | -- |
| ENSG00000222351 | 5.13E-15 | -2.63127 | 1 | 1 Y_RNA      | -- |
| ENSG00000222352 | 5.13E-15 | -2.63127 | 1 | 1 RN7SKP221  | -- |
| ENSG00000222355 | 5.13E-15 | -2.63127 | 1 | 1 RNU2-29P   | -- |
| ENSG00000222356 | 5.13E-15 | -2.63127 | 1 | 1 RNU6-710P  | -- |
| ENSG00000222357 | 5.13E-15 | -2.63127 | 1 | 1 RNU2-20P   | -- |
| ENSG00000222359 | 5.13E-15 | -2.63127 | 1 | 1 RNU6-355P  | -- |
| ENSG00000222361 | 5.13E-15 | -2.63127 | 1 | 1 RNU6-1186P | -- |
| ENSG00000222363 | 5.13E-15 | -2.63127 | 1 | 1 RNU4-34P   | -- |
| ENSG00000222364 | 5.13E-15 | -2.63127 | 1 | 1 RNU6-96P   | -- |
| ENSG00000222373 | 5.13E-15 | -2.63127 | 1 | 1 RNY5P5     | -- |
| ENSG00000222374 | 5.13E-15 | -2.63127 | 1 | 1 AC022021.1 | -- |
| ENSG00000222375 | 5.13E-15 | -2.63127 | 1 | 1 RN7SKP127  | -- |
| ENSG00000222376 | 5.13E-15 | -2.63127 | 1 | 1 RN7SKP152  | -- |
| ENSG00000222383 | 5.13E-15 | -2.63127 | 1 | 1 RNA5SP203  | -- |
| ENSG00000222385 | 5.13E-15 | -2.63127 | 1 | 1 RN7SKP158  | -- |
| ENSG00000222386 | 5.13E-15 | -2.63127 | 1 | 1 RN7SKP86   | -- |
| ENSG00000222391 | 5.13E-15 | -2.63127 | 1 | 1 AL137118.1 | -- |
| ENSG00000222394 | 5.13E-15 | -2.63127 | 1 | 1 Y_RNA      | -- |
| ENSG00000222395 | 5.13E-15 | -2.63127 | 1 | 1 Y_RNA      | -- |
| ENSG00000222397 | 5.13E-15 | -2.63127 | 1 | 1 RN7SKP229  | -- |
| ENSG00000222398 | 5.13E-15 | -2.63127 | 1 | 1 RNU6-554P  | -- |
| ENSG00000222399 | 5.13E-15 | -2.63127 | 1 | 1 RNU6-791P  | -- |

|                 |          |          |   |              |    |
|-----------------|----------|----------|---|--------------|----|
| ENSG00000222404 | 5.13E-15 | -2.63127 | 1 | 1 RN7SKP281  | -- |
| ENSG00000222405 | 5.13E-15 | -2.63127 | 1 | 1 RNU4-65P   | -- |
| ENSG00000222406 | 5.13E-15 | -2.63127 | 1 | 1 RNA5SP314  | -- |
| ENSG00000222407 | 5.13E-15 | -2.63127 | 1 | 1 RNA5SP80   | -- |
| ENSG00000222408 | 5.13E-15 | -2.63127 | 1 | 1 AL160279.1 | -- |
| ENSG00000222409 | 5.13E-15 | -2.63127 | 1 | 1 AC103996.1 | -- |
| ENSG00000222411 | 5.13E-15 | -2.63127 | 1 | 1 RNY5P3     | -- |
| ENSG00000222412 | 5.13E-15 | -2.63127 | 1 | 1 Y_RNA      | -- |
| ENSG00000222413 | 5.13E-15 | -2.63127 | 1 | 1 RN7SKP125  | -- |
| ENSG00000222414 | 5.13E-15 | -2.63127 | 1 | 1 RNU2-59P   | -- |
| ENSG00000222416 | 5.13E-15 | -2.63127 | 1 | 1 RNA5SP274  | -- |
| ENSG00000222418 | 5.13E-15 | -2.63127 | 1 | 1 RNA5SP113  | -- |
| ENSG00000222419 | 5.13E-15 | -2.63127 | 1 | 1 RNA5SP511  | -- |
| ENSG00000222421 | 5.13E-15 | -2.63127 | 1 | 1 Y_RNA      | -- |
| ENSG00000222426 | 5.13E-15 | -2.63127 | 1 | 1 RNU2-50P   | -- |
| ENSG00000222427 | 5.13E-15 | -2.63127 | 1 | 1 RNA5SP338  | -- |
| ENSG00000222428 | 5.13E-15 | -2.63127 | 1 | 1 RNA5SP231  | -- |
| ENSG00000222429 | 5.13E-15 | -2.63127 | 1 | 1 RNU6-955P  | -- |
| ENSG00000222430 | 5.13E-15 | -2.63127 | 1 | 1 Y_RNA      | -- |
| ENSG00000222431 | 5.13E-15 | -2.63127 | 1 | 1 RNU6-141P  | -- |
| ENSG00000222432 | 5.13E-15 | -2.63127 | 1 | 1 Y_RNA      | -- |
| ENSG00000222436 | 5.13E-15 | -2.63127 | 1 | 1 RN7SKP278  | -- |
| ENSG00000222437 | 5.13E-15 | -2.63127 | 1 | 1 AC118282.3 | -- |
| ENSG00000222438 | 5.13E-15 | -2.63127 | 1 | 1 RNU6-1077P | -- |
| ENSG00000222439 | 5.13E-15 | -2.63127 | 1 | 1 RNU6-994P  | -- |
| ENSG00000222440 | 5.13E-15 | -2.63127 | 1 | 1 RNU2-26P   | -- |
| ENSG00000222445 | 5.13E-15 | -2.63127 | 1 | 1 RN7SKP56   | -- |
| ENSG00000222449 | 5.13E-15 | -2.63127 | 1 | 1 RNU6-1140P | -- |
| ENSG00000222451 | 5.13E-15 | -2.63127 | 1 | 1 RN7SKP143  | -- |
| ENSG00000222452 | 5.13E-15 | -2.63127 | 1 | 1 RN7SKP59   | -- |
| ENSG00000222455 | 5.13E-15 | -2.63127 | 1 | 1 RNA5SP296  | -- |
| ENSG00000222457 | 5.13E-15 | -2.63127 | 1 | 1 RNU6-121P  | -- |
| ENSG00000222459 | 5.13E-15 | -2.63127 | 1 | 1 RNA5SP293  | -- |
| ENSG00000222463 | 5.13E-15 | -2.63127 | 1 | 1 AP005138.1 | -- |
| ENSG00000222465 | 5.13E-15 | -2.63127 | 1 | 1 RNU2-5P    | -- |
| ENSG00000222467 | 5.13E-15 | -2.63127 | 1 | 1 Y_RNA      | -- |
| ENSG00000222468 | 5.13E-15 | -2.63127 | 1 | 1 RNA5SP261  | -- |
| ENSG00000222472 | 5.13E-15 | -2.63127 | 1 | 1 RN7SKP7    | -- |
| ENSG00000222477 | 5.13E-15 | -2.63127 | 1 | 1 RNU2-23P   | -- |
| ENSG00000222481 | 5.13E-15 | -2.63127 | 1 | 1 AC012150.1 | -- |
| ENSG00000222482 | 5.13E-15 | -2.63127 | 1 | 1 AC005071.1 | -- |
| ENSG00000222486 | 5.13E-15 | -2.63127 | 1 | 1 RNU6-77P   | -- |
| ENSG00000222488 | 5.13E-15 | -2.63127 | 1 | 1 RNU6-285P  | -- |
| ENSG00000222490 | 5.13E-15 | -2.63127 | 1 | 1 RNU6-712P  | -- |
| ENSG00000222492 | 5.13E-15 | -2.63127 | 1 | 1 AC092069.1 | -- |
| ENSG00000222494 | 5.13E-15 | -2.63127 | 1 | 1 AC091178.1 | -- |
| ENSG00000222496 | 5.13E-15 | -2.63127 | 1 | 1 RN7SKP200  | -- |
| ENSG00000222499 | 5.13E-15 | -2.63127 | 1 | 1 RN7SKP177  | -- |
| ENSG00000222500 | 5.13E-15 | -2.63127 | 1 | 1 RNA5SP475  | -- |
| ENSG00000222501 | 5.13E-15 | -2.63127 | 1 | 1 RNU4-25P   | -- |
| ENSG00000222506 | 5.13E-15 | -2.63127 | 1 | 1 Y_RNA      | -- |
| ENSG00000222509 | 5.13E-15 | -2.63127 | 1 | 1 Y_RNA      | -- |
| ENSG00000222511 | 5.13E-15 | -2.63127 | 1 | 1 Y_RNA      | -- |
| ENSG00000222512 | 5.13E-15 | -2.63127 | 1 | 1 AL137019.1 | -- |
| ENSG00000222514 | 5.13E-15 | -2.63127 | 1 | 1 RN7SKP223  | -- |
| ENSG00000222515 | 5.13E-15 | -2.63127 | 1 | 1 RN7SKP240  | -- |
| ENSG00000222518 | 5.13E-15 | -2.63127 | 1 | 1 AL645819.1 | -- |
| ENSG00000222520 | 5.13E-15 | -2.63127 | 1 | 1 RNA5SP451  | -- |

|                 |          |          |   |              |    |
|-----------------|----------|----------|---|--------------|----|
| ENSG00000222521 | 5.13E-15 | -2.63127 | 1 | 1 AC026956.1 | -- |
| ENSG00000222522 | 5.13E-15 | -2.63127 | 1 | 1 RNU6-519P  | -- |
| ENSG00000222524 | 5.13E-15 | -2.63127 | 1 | 1 RN7SKP109  | -- |
| ENSG00000222526 | 5.13E-15 | -2.63127 | 1 | 1 AC060835.1 | -- |
| ENSG00000222529 | 5.13E-15 | -2.63127 | 1 | 1 Y_RNA      | -- |
| ENSG00000222532 | 5.13E-15 | -2.63127 | 1 | 1 MIR1468    | -- |
| ENSG00000222536 | 5.13E-15 | -2.63127 | 1 | 1 RNU2-39P   | -- |
| ENSG00000222543 | 5.13E-15 | -2.63127 | 1 | 1 RN7SKP220  | -- |
| ENSG00000222544 | 5.13E-15 | -2.63127 | 1 | 1 RNU6-735P  | -- |
| ENSG00000222545 | 5.13E-15 | -2.63127 | 1 | 1 AC080037.1 | -- |
| ENSG00000222546 | 5.13E-15 | -2.63127 | 1 | 1 RNA5SP251  | -- |
| ENSG00000222548 | 5.13E-15 | -2.63127 | 1 | 1 AC006534.1 | -- |
| ENSG00000222551 | 5.13E-15 | -2.63127 | 1 | 1 AC106732.1 | -- |
| ENSG00000222552 | 5.13E-15 | -2.63127 | 1 | 1 RNA5SP60   | -- |
| ENSG00000222558 | 5.13E-15 | -2.63127 | 1 | 1 RNU6-1064P | -- |
| ENSG00000222560 | 5.13E-15 | -2.63127 | 1 | 1 RNU4-43P   | -- |
| ENSG00000222561 | 5.13E-15 | -2.63127 | 1 | 1 RNU6-1025P | -- |
| ENSG00000222563 | 5.13E-15 | -2.63127 | 1 | 1 RNU6-305P  | -- |
| ENSG00000222570 | 5.13E-15 | -2.63127 | 1 | 1 AF216667.1 | -- |
| ENSG00000222574 | 5.13E-15 | -2.63127 | 1 | 1 RN7SKP61   | -- |
| ENSG00000222578 | 5.13E-15 | -2.63127 | 1 | 1 RNA5SP345  | -- |
| ENSG00000222579 | 5.13E-15 | -2.63127 | 1 | 1 Y_RNA      | -- |
| ENSG00000222581 | 5.13E-15 | -2.63127 | 1 | 1 RNU2-47P   | -- |
| ENSG00000222582 | 5.13E-15 | -2.63127 | 1 | 1 RNU2-66P   | -- |
| ENSG00000222583 | 5.13E-15 | -2.63127 | 1 | 1 RN7SKP222  | -- |
| ENSG00000222585 | 5.13E-15 | -2.63127 | 1 | 1 RNA5SP494  | -- |
| ENSG00000222586 | 5.13E-15 | -2.63127 | 1 | 1 AC010999.1 | -- |
| ENSG00000222588 | 5.13E-15 | -2.63127 | 1 | 1 SNORA19    | -- |
| ENSG00000222589 | 5.13E-15 | -2.63127 | 1 | 1 RN7SKP159  | -- |
| ENSG00000222591 | 5.13E-15 | -2.63127 | 1 | 1 AC118345.2 | -- |
| ENSG00000222592 | 5.13E-15 | -2.63127 | 1 | 1 RNU6-887P  | -- |
| ENSG00000222594 | 5.13E-15 | -2.63127 | 1 | 1 RN7SKP235  | -- |
| ENSG00000222596 | 5.13E-15 | -2.63127 | 1 | 1 AL445523.1 | -- |
| ENSG00000222598 | 5.13E-15 | -2.63127 | 1 | 1 RNU2-49P   | -- |
| ENSG00000222601 | 5.13E-15 | -2.63127 | 1 | 1 Y_RNA      | -- |
| ENSG00000222602 | 5.13E-15 | -2.63127 | 1 | 1 AL136160.1 | -- |
| ENSG00000222604 | 5.13E-15 | -2.63127 | 1 | 1 SNORA7     | -- |
| ENSG00000222607 | 5.13E-15 | -2.63127 | 1 | 1 RNU6-628P  | -- |
| ENSG00000222608 | 5.13E-15 | -2.63127 | 1 | 1 RNA5SP504  | -- |
| ENSG00000222609 | 5.13E-15 | -2.63127 | 1 | 1 RNU4-69P   | -- |
| ENSG00000222611 | 5.13E-15 | -2.63127 | 1 | 1 AL355388.1 | -- |
| ENSG00000222612 | 5.13E-15 | -2.63127 | 1 | 1 RNU2-52P   | -- |
| ENSG00000222613 | 5.13E-15 | -2.63127 | 1 | 1 Y_RNA      | -- |
| ENSG00000222614 | 5.13E-15 | -2.63127 | 1 | 1 Y_RNA      | -- |
| ENSG00000222615 | 5.13E-15 | -2.63127 | 1 | 1 AC134025.1 | -- |
| ENSG00000222616 | 5.13E-15 | -2.63127 | 1 | 1 RN7SKP27   | -- |
| ENSG00000222617 | 5.13E-15 | -2.63127 | 1 | 1 RN7SKP254  | -- |
| ENSG00000222623 | 5.13E-15 | -2.63127 | 1 | 1 RNU6-1100P | -- |
| ENSG00000222624 | 5.13E-15 | -2.63127 | 1 | 1 RNU2-15P   | -- |
| ENSG00000222626 | 5.13E-15 | -2.63127 | 1 | 1 RNU2-48P   | -- |
| ENSG00000222627 | 5.13E-15 | -2.63127 | 1 | 1 RNU2-37P   | -- |
| ENSG00000222629 | 5.13E-15 | -2.63127 | 1 | 1 RNU2-42P   | -- |
| ENSG00000222630 | 5.13E-15 | -2.63127 | 1 | 1 RN7SKP41   | -- |
| ENSG00000222631 | 5.13E-15 | -2.63127 | 1 | 1 AC025426.1 | -- |
| ENSG00000222635 | 5.13E-15 | -2.63127 | 1 | 1 RNU6-1203P | -- |
| ENSG00000222636 | 5.13E-15 | -2.63127 | 1 | 1 RN7SKP54   | -- |
| ENSG00000222640 | 5.13E-15 | -2.63127 | 1 | 1 RNU2-51P   | -- |
| ENSG00000222643 | 5.13E-15 | -2.63127 | 1 | 1 AL603632.1 | -- |

|                 |          |          |   |              |    |
|-----------------|----------|----------|---|--------------|----|
| ENSG00000222644 | 5.13E-15 | -2.63127 | 1 | 1 RNU2-16P   | -- |
| ENSG00000222647 | 5.13E-15 | -2.63127 | 1 | 1 AC002070.1 | -- |
| ENSG00000222649 | 5.13E-15 | -2.63127 | 1 | 1 Y_RNA      | -- |
| ENSG00000222650 | 5.13E-15 | -2.63127 | 1 | 1 RNU2-70P   | -- |
| ENSG00000222651 | 5.13E-15 | -2.63127 | 1 | 1 MIR1469    | -- |
| ENSG00000222652 | 5.13E-15 | -2.63127 | 1 | 1 RNU6-248P  | -- |
| ENSG00000222658 | 5.13E-15 | -2.63127 | 1 | 1 Y_RNA      | -- |
| ENSG00000222659 | 5.13E-15 | -2.63127 | 1 | 1 RNU2-8P    | -- |
| ENSG00000222663 | 5.13E-15 | -2.63127 | 1 | 1 RNU4-55P   | -- |
| ENSG00000222664 | 5.13E-15 | -2.63127 | 1 | 1 RN7SKP123  | -- |
| ENSG00000222666 | 5.13E-15 | -2.63127 | 1 | 1 U3         | -- |
| ENSG00000222667 | 5.13E-15 | -2.63127 | 1 | 1 RNU6-394P  | -- |
| ENSG00000222675 | 5.13E-15 | -2.63127 | 1 | 1 RNA5SP146  | -- |
| ENSG00000222677 | 5.13E-15 | -2.63127 | 1 | 1 AL513123.1 | -- |
| ENSG00000222678 | 5.13E-15 | -2.63127 | 1 | 1 RN7SKP213  | -- |
| ENSG00000222679 | 5.13E-15 | -2.63127 | 1 | 1 RNU6-1267P | -- |
| ENSG00000222682 | 5.13E-15 | -2.63127 | 1 | 1 RNA5SP38   | -- |
| ENSG00000222683 | 5.13E-15 | -2.63127 | 1 | 1 AC093004.1 | -- |
| ENSG00000222685 | 5.13E-15 | -2.63127 | 1 | 1 RN7SKP119  | -- |
| ENSG00000222686 | 5.13E-15 | -2.63127 | 1 | 1 RNU4-72P   | -- |
| ENSG00000222691 | 5.13E-15 | -2.63127 | 1 | 1 RNU6-733P  | -- |
| ENSG00000222692 | 5.13E-15 | -2.63127 | 1 | 1 AC007402.1 | -- |
| ENSG00000222693 | 5.13E-15 | -2.63127 | 1 | 1 RN7SKP120  | -- |
| ENSG00000222698 | 5.13E-15 | -2.63127 | 1 | 1 Y_RNA      | -- |
| ENSG00000222701 | 5.13E-15 | -2.63127 | 1 | 1 Y_RNA      | -- |
| ENSG00000222704 | 5.13E-15 | -2.63127 | 1 | 1 RN7SKP182  | -- |
| ENSG00000222706 | 5.13E-15 | -2.63127 | 1 | 1 RN7SKP89   | -- |
| ENSG00000222713 | 5.13E-15 | -2.63127 | 1 | 1 RN7SKP51   | -- |
| ENSG00000222714 | 5.13E-15 | -2.63127 | 1 | 1 RN7SKP38   | -- |
| ENSG00000222715 | 5.13E-15 | -2.63127 | 1 | 1 MIR1911    | -- |
| ENSG00000222717 | 5.13E-15 | -2.63127 | 1 | 1 AC016553.1 | -- |
| ENSG00000222719 | 5.13E-15 | -2.63127 | 1 | 1 AC116038.2 | -- |
| ENSG00000222720 | 5.13E-15 | -2.63127 | 1 | 1 AC027307.1 | -- |
| ENSG00000222721 | 5.13E-15 | -2.63127 | 1 | 1 RN7SKP188  | -- |
| ENSG00000222722 | 5.13E-15 | -2.63127 | 1 | 1 AL161790.1 | -- |
| ENSG00000222726 | 5.13E-15 | -2.63127 | 1 | 1 RNU2-7P    | -- |
| ENSG00000222727 | 5.13E-15 | -2.63127 | 1 | 1 RNU4-64P   | -- |
| ENSG00000222729 | 5.13E-15 | -2.63127 | 1 | 1 RNU2-67P   | -- |
| ENSG00000222730 | 5.13E-15 | -2.63127 | 1 | 1 AC092296.1 | -- |
| ENSG00000222732 | 5.13E-15 | -2.63127 | 1 | 1 AC008671.1 | -- |
| ENSG00000222733 | 5.13E-15 | -2.63127 | 1 | 1 RNY4P29    | -- |
| ENSG00000222736 | 5.13E-15 | -2.63127 | 1 | 1 RNU4-6P    | -- |
| ENSG00000222740 | 5.13E-15 | -2.63127 | 1 | 1 RNA5SP328  | -- |
| ENSG00000222741 | 5.13E-15 | -2.63127 | 1 | 1 RNA5SP229  | -- |
| ENSG00000222743 | 5.13E-15 | -2.63127 | 1 | 1 RNU6-1190P | -- |
| ENSG00000222744 | 5.13E-15 | -2.63127 | 1 | 1 RN7SKP166  | -- |
| ENSG00000222747 | 5.13E-15 | -2.63127 | 1 | 1 RNA5SP25   | -- |
| ENSG00000222749 | 5.13E-15 | -2.63127 | 1 | 1 AL021398.1 | -- |
| ENSG00000222750 | 5.13E-15 | -2.63127 | 1 | 1 RNU4-46P   | -- |
| ENSG00000222755 | 5.13E-15 | -2.63127 | 1 | 1 RN7SKP206  | -- |
| ENSG00000222760 | 5.13E-15 | -2.63127 | 1 | 1 RNU4-53P   | -- |
| ENSG00000222761 | 5.13E-15 | -2.63127 | 1 | 1 RNU6-684P  | -- |
| ENSG00000222764 | 5.13E-15 | -2.63127 | 1 | 1 RN7SKP106  | -- |
| ENSG00000222765 | 5.13E-15 | -2.63127 | 1 | 1 RNU2-40P   | -- |
| ENSG00000222767 | 5.13E-15 | -2.63127 | 1 | 1 Y_RNA      | -- |
| ENSG00000222770 | 5.13E-15 | -2.63127 | 1 | 1 AC138761.1 | -- |
| ENSG00000222774 | 5.13E-15 | -2.63127 | 1 | 1 RN7SKP121  | -- |
| ENSG00000222776 | 5.13E-15 | -2.63127 | 1 | 1 AE000659.1 | -- |

|                 |          |          |   |              |    |
|-----------------|----------|----------|---|--------------|----|
| ENSG00000222777 | 5.13E-15 | -2.63127 | 1 | 1 RNU6-233P  | -- |
| ENSG00000222778 | 5.13E-15 | -2.63127 | 1 | 1 RNA5SP144  | -- |
| ENSG00000222783 | 5.13E-15 | -2.63127 | 1 | 1 RN7SKP212  | -- |
| ENSG00000222784 | 5.13E-15 | -2.63127 | 1 | 1 RN7SKP91   | -- |
| ENSG00000222787 | 5.13E-15 | -2.63127 | 1 | 1 AL645944.1 | -- |
| ENSG00000222788 | 5.13E-15 | -2.63127 | 1 | 1 RNU2-38P   | -- |
| ENSG00000222790 | 5.13E-15 | -2.63127 | 1 | 1 RNU4-14P   | -- |
| ENSG00000222791 | 5.13E-15 | -2.63127 | 1 | 1 RNU6-67P   | -- |
| ENSG00000222792 | 5.13E-15 | -2.63127 | 1 | 1 RNU6-860P  | -- |
| ENSG00000222795 | 5.13E-15 | -2.63127 | 1 | 1 RNU4-83P   | -- |
| ENSG00000222796 | 5.13E-15 | -2.63127 | 1 | 1 RNU6-383P  | -- |
| ENSG00000222805 | 5.13E-15 | -2.63127 | 1 | 1 AC010319.1 | -- |
| ENSG00000222806 | 5.13E-15 | -2.63127 | 1 | 1 RNA5SP225  | -- |
| ENSG00000222810 | 5.13E-15 | -2.63127 | 1 | 1 RNU2-68P   | -- |
| ENSG00000222821 | 5.13E-15 | -2.63127 | 1 | 1 RNU4-27P   | -- |
| ENSG00000222826 | 5.13E-15 | -2.63127 | 1 | 1 RN7SKP286  | -- |
| ENSG00000222831 | 5.13E-15 | -2.63127 | 1 | 1 MIR1537    | -- |
| ENSG00000222832 | 5.13E-15 | -2.63127 | 1 | 1 RNA5SP120  | -- |
| ENSG00000222833 | 5.13E-15 | -2.63127 | 1 | 1 AC069067.1 | -- |
| ENSG00000222834 | 5.13E-15 | -2.63127 | 1 | 1 AC074035.1 | -- |
| ENSG00000222835 | 5.13E-15 | -2.63127 | 1 | 1 RNA5SP100  | -- |
| ENSG00000222838 | 5.13E-15 | -2.63127 | 1 | 1 RNA5SP136  | -- |
| ENSG00000222842 | 5.13E-15 | -2.63127 | 1 | 1 RN7SKP168  | -- |
| ENSG00000222844 | 5.13E-15 | -2.63127 | 1 | 1 RNU6-321P  | -- |
| ENSG00000222845 | 5.13E-15 | -2.63127 | 1 | 1 RN7SKP42   | -- |
| ENSG00000222849 | 5.13E-15 | -2.63127 | 1 | 1 RNA5SP21   | -- |
| ENSG00000222852 | 5.13E-15 | -2.63127 | 1 | 1 Y_RNA      | -- |
| ENSG00000222854 | 5.13E-15 | -2.63127 | 1 | 1 RNA5SP59   | -- |
| ENSG00000222858 | 5.13E-15 | -2.63127 | 1 | 1 RNU6-920P  | -- |
| ENSG00000222859 | 5.13E-15 | -2.63127 | 1 | 1 RN7SKP136  | -- |
| ENSG00000222861 | 5.13E-15 | -2.63127 | 1 | 1 RNY5P4     | -- |
| ENSG00000222862 | 5.13E-15 | -2.63127 | 1 | 1 RNU6-1086P | -- |
| ENSG00000222864 | 5.13E-15 | -2.63127 | 1 | 1 AL596268.1 | -- |
| ENSG00000222869 | 5.13E-15 | -2.63127 | 1 | 1 RNU6-565P  | -- |
| ENSG00000222870 | 5.13E-15 | -2.63127 | 1 | 1 RNU6-1328P | -- |
| ENSG00000222872 | 5.13E-15 | -2.63127 | 1 | 1 RNU4-78P   | -- |
| ENSG00000222874 | 5.13E-15 | -2.63127 | 1 | 1 RN7SKP33   | -- |
| ENSG00000222880 | 5.13E-15 | -2.63127 | 1 | 1 RN7SKP261  | -- |
| ENSG00000222883 | 5.13E-15 | -2.63127 | 1 | 1 Y_RNA      | -- |
| ENSG00000222884 | 5.13E-15 | -2.63127 | 1 | 1 AC023513.1 | -- |
| ENSG00000222888 | 5.13E-15 | -2.63127 | 1 | 1 AC012467.1 | -- |
| ENSG00000222889 | 5.13E-15 | -2.63127 | 1 | 1 RN7SKP29   | -- |
| ENSG00000222890 | 5.13E-15 | -2.63127 | 1 | 1 RNU6-1068P | -- |
| ENSG00000222894 | 5.13E-15 | -2.63127 | 1 | 1 AL662800.1 | -- |
| ENSG00000222895 | 5.13E-15 | -2.63127 | 1 | 1 RNU6-1133P | -- |
| ENSG00000222899 | 5.13E-15 | -2.63127 | 1 | 1 AL110292.1 | -- |
| ENSG00000222909 | 5.13E-15 | -2.63127 | 1 | 1 RNU6-193P  | -- |
| ENSG00000222915 | 5.13E-15 | -2.63127 | 1 | 1 RNU6-564P  | -- |
| ENSG00000222920 | 5.13E-15 | -2.63127 | 1 | 1 RNA5SP29   | -- |
| ENSG00000222921 | 5.13E-15 | -2.63127 | 1 | 1 RNA5SP104  | -- |
| ENSG00000222922 | 5.13E-15 | -2.63127 | 1 | 1 RNA5SP501  | -- |
| ENSG00000222923 | 5.13E-15 | -2.63127 | 1 | 1 RNU2-41P   | -- |
| ENSG00000222924 | 5.13E-15 | -2.63127 | 1 | 1 RNU6-1148P | -- |
| ENSG00000222931 | 5.13E-15 | -2.63127 | 1 | 1 RN7SKP205  | -- |
| ENSG00000222932 | 5.13E-15 | -2.63127 | 1 | 1 RNU6-172P  | -- |
| ENSG00000222934 | 5.13E-15 | -2.63127 | 1 | 1 RN7SKP284  | -- |
| ENSG00000222939 | 5.13E-15 | -2.63127 | 1 | 1 AC079467.1 | -- |
| ENSG00000222940 | 5.13E-15 | -2.63127 | 1 | 1 RNU6-370P  | -- |

|                 |          |          |   |              |    |
|-----------------|----------|----------|---|--------------|----|
| ENSG00000222941 | 5.13E-15 | -2.63127 | 1 | 1 Y_RNA      | -- |
| ENSG00000222942 | 5.13E-15 | -2.63127 | 1 | 1 RN7SKP58   | -- |
| ENSG00000222945 | 5.13E-15 | -2.63127 | 1 | 1 AC091866.1 | -- |
| ENSG00000222950 | 5.13E-15 | -2.63127 | 1 | 1 RN7SKP262  | -- |
| ENSG00000222952 | 5.13E-15 | -2.63127 | 1 | 1 RNA5SP41   | -- |
| ENSG00000222954 | 5.13E-15 | -2.63127 | 1 | 1 AC110611.1 | -- |
| ENSG00000222955 | 5.13E-15 | -2.63127 | 1 | 1 RNA5SP265  | -- |
| ENSG00000222958 | 5.13E-15 | -2.63127 | 1 | 1 MIR1913    | -- |
| ENSG00000222960 | 5.13E-15 | -2.63127 | 1 | 1 RNU6-272P  | -- |
| ENSG00000222961 | 5.13E-15 | -2.63127 | 1 | 1 AC008949.1 | -- |
| ENSG00000222966 | 5.13E-15 | -2.63127 | 1 | 1 SNORA40    | -- |
| ENSG00000222969 | 5.13E-15 | -2.63127 | 1 | 1 RN7SKP8    | -- |
| ENSG00000222971 | 5.13E-15 | -2.63127 | 1 | 1 RNA5SP222  | -- |
| ENSG00000222972 | 5.13E-15 | -2.63127 | 1 | 1 RNU6-651P  | -- |
| ENSG00000222973 | 5.13E-15 | -2.63127 | 1 | 1 RNU2-25P   | -- |
| ENSG00000222974 | 5.13E-15 | -2.63127 | 1 | 1 RN7SKP228  | -- |
| ENSG00000222976 | 5.13E-15 | -2.63127 | 1 | 1 RN7SKP94   | -- |
| ENSG00000222978 | 5.13E-15 | -2.63127 | 1 | 1 Y_RNA      | -- |
| ENSG00000222979 | 5.13E-15 | -2.63127 | 1 | 1 RN7SKP167  | -- |
| ENSG00000222982 | 5.13E-15 | -2.63127 | 1 | 1 RN7SKP216  | -- |
| ENSG00000222983 | 5.13E-15 | -2.63127 | 1 | 1 RNA5SP127  | -- |
| ENSG00000222985 | 5.13E-15 | -2.63127 | 1 | 1 RNU2-14P   | -- |
| ENSG00000222986 | 5.13E-15 | -2.63127 | 1 | 1 RNU5A-5P   | -- |
| ENSG00000222987 | 5.13E-15 | -2.63127 | 1 | 1 RN7SKP68   | -- |
| ENSG00000222990 | 5.13E-15 | -2.63127 | 1 | 1 RNU4-22P   | -- |
| ENSG00000222994 | 5.13E-15 | -2.63127 | 1 | 1 AC006322.1 | -- |
| ENSG00000222997 | 5.13E-15 | -2.63127 | 1 | 1 Y_RNA      | -- |
| ENSG00000222998 | 5.13E-15 | -2.63127 | 1 | 1 RN7SKP259  | -- |
| ENSG00000222999 | 5.13E-15 | -2.63127 | 1 | 1 AC105247.1 | -- |
| ENSG00000223001 | 5.13E-15 | -2.63127 | 1 | 1 RNU2-61P   | -- |
| ENSG00000223004 | 5.13E-15 | -2.63127 | 1 | 1 SNORD29    | -- |
| ENSG00000223006 | 5.13E-15 | -2.63127 | 1 | 1 RN7SKP137  | -- |
| ENSG00000223007 | 5.13E-15 | -2.63127 | 1 | 1 RN7SKP73   | -- |
| ENSG00000223009 | 5.13E-15 | -2.63127 | 1 | 1 AL138930.1 | -- |
| ENSG00000223012 | 5.13E-15 | -2.63127 | 1 | 1 RN7SKP264  | -- |
| ENSG00000223013 | 5.13E-15 | -2.63127 | 1 | 1 RNA5SP344  | -- |
| ENSG00000223015 | 5.13E-15 | -2.63127 | 1 | 1 RNU6-1135P | -- |
| ENSG00000223018 | 5.13E-15 | -2.63127 | 1 | 1 AL096700.1 | -- |
| ENSG00000223019 | 5.13E-15 | -2.63127 | 1 | 1 RNA5SP306  | -- |
| ENSG00000223023 | 5.13E-15 | -2.63127 | 1 | 1 Y_RNA      | -- |
| ENSG00000223024 | 5.13E-15 | -2.63127 | 1 | 1 RNU6-55P   | -- |
| ENSG00000223026 | 5.13E-15 | -2.63127 | 1 | 1 RN7SKP247  | -- |
| ENSG00000223027 | 5.13E-15 | -2.63127 | 1 | 1 SNORA57    | -- |
| ENSG00000223029 | 5.13E-15 | -2.63127 | 1 | 1 AC004969.1 | -- |
| ENSG00000223030 | 5.13E-15 | -2.63127 | 1 | 1 AC091697.1 | -- |
| ENSG00000223036 | 5.13E-15 | -2.63127 | 1 | 1 AC024158.1 | -- |
| ENSG00000223037 | 5.13E-15 | -2.63127 | 1 | 1 RNU6-284P  | -- |
| ENSG00000223039 | 5.13E-15 | -2.63127 | 1 | 1 RN7SKP268  | -- |
| ENSG00000223040 | 5.13E-15 | -2.63127 | 1 | 1 RN7SKP144  | -- |
| ENSG00000223042 | 5.13E-15 | -2.63127 | 1 | 1 RN7SKP161  | -- |
| ENSG00000223044 | 5.13E-15 | -2.63127 | 1 | 1 RNU6-130P  | -- |
| ENSG00000223046 | 5.13E-15 | -2.63127 | 1 | 1 RNA5SP369  | -- |
| ENSG00000223047 | 5.13E-15 | -2.63127 | 1 | 1 RNU6-847P  | -- |
| ENSG00000223052 | 5.13E-15 | -2.63127 | 1 | 1 AC007096.1 | -- |
| ENSG00000223053 | 5.13E-15 | -2.63127 | 1 | 1 AC022142.1 | -- |
| ENSG00000223056 | 5.13E-15 | -2.63127 | 1 | 1 RN7SKP169  | -- |
| ENSG00000223059 | 5.13E-15 | -2.63127 | 1 | 1 AL354896.1 | -- |
| ENSG00000223062 | 5.13E-15 | -2.63127 | 1 | 1 RNU6-1245P | -- |

|                 |          |          |   |              |    |
|-----------------|----------|----------|---|--------------|----|
| ENSG00000223063 | 5.13E-15 | -2.63127 | 1 | 1 AL157823.1 | -- |
| ENSG00000223064 | 5.13E-15 | -2.63127 | 1 | 1 RNU6-325P  | -- |
| ENSG00000223070 | 5.13E-15 | -2.63127 | 1 | 1 AC006377.1 | -- |
| ENSG00000223075 | 5.13E-15 | -2.63127 | 1 | 1 RN7SKP126  | -- |
| ENSG00000223076 | 5.13E-15 | -2.63127 | 1 | 1 RNA5SP31   | -- |
| ENSG00000223078 | 5.13E-15 | -2.63127 | 1 | 1 RNU2-55P   | -- |
| ENSG00000223080 | 5.13E-15 | -2.63127 | 1 | 1 Y_RNA      | -- |
| ENSG00000223082 | 5.13E-15 | -2.63127 | 1 | 1 AC121336.1 | -- |
| ENSG00000223086 | 5.13E-15 | -2.63127 | 1 | 1 RNA5SP155  | -- |
| ENSG00000223087 | 5.13E-15 | -2.63127 | 1 | 1 RNU6-602P  | -- |
| ENSG00000223088 | 5.13E-15 | -2.63127 | 1 | 1 RMRPP5     | -- |
| ENSG00000223091 | 5.13E-15 | -2.63127 | 1 | 1 RNU6-981P  | -- |
| ENSG00000223092 | 5.13E-15 | -2.63127 | 1 | 1 RNA5SP115  | -- |
| ENSG00000223096 | 5.13E-15 | -2.63127 | 1 | 1 RNU5E-9P   | -- |
| ENSG00000223099 | 5.13E-15 | -2.63127 | 1 | 1 AC119751.4 | -- |
| ENSG00000223101 | 5.13E-15 | -2.63127 | 1 | 1 AP002364.1 | -- |
| ENSG00000223107 | 5.13E-15 | -2.63127 | 1 | 1 RNU2-72P   | -- |
| ENSG00000223109 | 5.13E-15 | -2.63127 | 1 | 1 MIR1538    | -- |
| ENSG00000223111 | 5.13E-15 | -2.63127 | 1 | 1 SNORA74    | -- |
| ENSG00000223116 | 5.13E-15 | -2.63127 | 1 | 1 AL157931.1 | -- |
| ENSG00000223118 | 5.13E-15 | -2.63127 | 1 | 1 RN7SKP102  | -- |
| ENSG00000223119 | 5.13E-15 | -2.63127 | 1 | 1 RNU6-1139P | -- |
| ENSG00000223120 | 5.13E-15 | -2.63127 | 1 | 1 RN7SKP181  | -- |
| ENSG00000223123 | 5.13E-15 | -2.63127 | 1 | 1 AC010546.1 | -- |
| ENSG00000223125 | 5.13E-15 | -2.63127 | 1 | 1 RNU2-32P   | -- |
| ENSG00000223126 | 5.13E-15 | -2.63127 | 1 | 1 RN7SKP263  | -- |
| ENSG00000223128 | 5.13E-15 | -2.63127 | 1 | 1 RN7SKP140  | -- |
| ENSG00000223131 | 5.13E-15 | -2.63127 | 1 | 1 RNA5SP304  | -- |
| ENSG00000223134 | 5.13E-15 | -2.63127 | 1 | 1 AL122015.1 | -- |
| ENSG00000223136 | 5.13E-15 | -2.63127 | 1 | 1 RN7SKP207  | -- |
| ENSG00000223142 | 5.13E-15 | -2.63127 | 1 | 1 RN7SKP252  | -- |
| ENSG00000223145 | 5.13E-15 | -2.63127 | 1 | 1 RN7SKP112  | -- |
| ENSG00000223148 | 5.13E-15 | -2.63127 | 1 | 1 AC011478.1 | -- |
| ENSG00000223149 | 5.13E-15 | -2.63127 | 1 | 1 AC010376.1 | -- |
| ENSG00000223152 | 5.13E-15 | -2.63127 | 1 | 1 RNU4-88P   | -- |
| ENSG00000223156 | 5.13E-15 | -2.63127 | 1 | 1 RNU2-18P   | -- |
| ENSG00000223158 | 5.13E-15 | -2.63127 | 1 | 1 RNY1P3     | -- |
| ENSG00000223162 | 5.13E-15 | -2.63127 | 1 | 1 RNA5SP280  | -- |
| ENSG00000223164 | 5.13E-15 | -2.63127 | 1 | 1 AL445384.1 | -- |
| ENSG00000223168 | 5.13E-15 | -2.63127 | 1 | 1 RN7SKP142  | -- |
| ENSG00000223169 | 5.13E-15 | -2.63127 | 1 | 1 RNA5SP209  | -- |
| ENSG00000223174 | 5.13E-15 | -2.63127 | 1 | 1 RN7SKP17   | -- |
| ENSG00000223175 | 5.13E-15 | -2.63127 | 1 | 1 RNU4-61P   | -- |
| ENSG00000223177 | 5.13E-15 | -2.63127 | 1 | 1 RNA5SP39   | -- |
| ENSG00000223179 | 5.13E-15 | -2.63127 | 1 | 1 RNU6-373P  | -- |
| ENSG00000223180 | 5.13E-15 | -2.63127 | 1 | 1 AC087738.1 | -- |
| ENSG00000223181 | 5.13E-15 | -2.63127 | 1 | 1 RNU6-1199P | -- |
| ENSG00000223182 | 5.13E-15 | -2.63127 | 1 | 1 SNORA74    | -- |
| ENSG00000223189 | 5.13E-15 | -2.63127 | 1 | 1 RNU6-177P  | -- |
| ENSG00000223190 | 5.13E-15 | -2.63127 | 1 | 1 RN7SKP100  | -- |
| ENSG00000223191 | 5.13E-15 | -2.63127 | 1 | 1 RNU6-293P  | -- |
| ENSG00000223192 | 5.13E-15 | -2.63127 | 1 | 1 Y_RNA      | -- |
| ENSG00000223197 | 5.13E-15 | -2.63127 | 1 | 1 RNU6-1001P | -- |
| ENSG00000223200 | 5.13E-15 | -2.63127 | 1 | 1 AC008836.1 | -- |
| ENSG00000223201 | 5.13E-15 | -2.63127 | 1 | 1 AC004699.1 | -- |
| ENSG00000223202 | 5.13E-15 | -2.63127 | 1 | 1 RN7SKP297  | -- |
| ENSG00000223203 | 5.13E-15 | -2.63127 | 1 | 1 RNA5SP221  | -- |
| ENSG00000223208 | 5.13E-15 | -2.63127 | 1 | 1 RNU6-1217P | -- |



|                 |          |          |   |              |    |
|-----------------|----------|----------|---|--------------|----|
| ENSG00000223211 | 5.13E-15 | -2.63127 | 1 | 1 AL158150.1 | -- |
| ENSG00000223212 | 5.13E-15 | -2.63127 | 1 | 1 RNU4-74P   | -- |
| ENSG00000223213 | 5.13E-15 | -2.63127 | 1 | 1 SNORD81    | -- |
| ENSG00000223214 | 5.13E-15 | -2.63127 | 1 | 1 AC091559.1 | -- |
| ENSG00000223215 | 5.13E-15 | -2.63127 | 1 | 1 RNU6-607P  | -- |
| ENSG00000223217 | 5.13E-15 | -2.63127 | 1 | 1 RNU6-938P  | -- |
| ENSG00000223220 | 5.13E-15 | -2.63127 | 1 | 1 Y_RNA      | -- |
| ENSG00000223223 | 5.13E-15 | -2.63127 | 1 | 1 RN7SKP192  | -- |
| ENSG00000223224 | 5.13E-15 | -2.63127 | 1 | 1 SNORD71    | -- |
| ENSG00000223225 | 5.13E-15 | -2.63127 | 1 | 1 RNU6-1054P | -- |
| ENSG00000223229 | 5.13E-15 | -2.63127 | 1 | 1 RN7SKP270  | -- |
| ENSG00000223231 | 5.13E-15 | -2.63127 | 1 | 1 AL035706.1 | -- |
| ENSG00000223235 | 5.13E-15 | -2.63127 | 1 | 1 AP003498.2 | -- |
| ENSG00000223238 | 5.13E-15 | -2.63127 | 1 | 1 RNA5SP294  | -- |
| ENSG00000223243 | 5.13E-15 | -2.63127 | 1 | 1 AC074323.1 | -- |
| ENSG00000223244 | 5.13E-15 | -2.63127 | 1 | 1 MIR1909    | -- |
| ENSG00000223245 | 5.13E-15 | -2.63127 | 1 | 1 RNU4-63P   | -- |
| ENSG00000223247 | 5.13E-15 | -2.63127 | 1 | 1 RNU2-64P   | -- |
| ENSG00000223249 | 5.13E-15 | -2.63127 | 1 | 1 Y_RNA      | -- |
| ENSG00000223253 | 5.13E-15 | -2.63127 | 1 | 1 AC022872.1 | -- |
| ENSG00000223255 | 5.13E-15 | -2.63127 | 1 | 1 RN7SKP274  | -- |
| ENSG00000223256 | 5.13E-15 | -2.63127 | 1 | 1 RNU6-785P  | -- |
| ENSG00000223258 | 5.13E-15 | -2.63127 | 1 | 1 RNU6-575P  | -- |
| ENSG00000223259 | 5.13E-15 | -2.63127 | 1 | 1 RNA5SP508  | -- |
| ENSG00000223260 | 5.13E-15 | -2.63127 | 1 | 1 RN7SKP194  | -- |
| ENSG00000223262 | 5.13E-15 | -2.63127 | 1 | 1 RNA5SP492  | -- |
| ENSG00000223265 | 5.13E-15 | -2.63127 | 1 | 1 RNU6-592P  | -- |
| ENSG00000223269 | 5.13E-15 | -2.63127 | 1 | 1 RN7SKP53   | -- |
| ENSG00000223271 | 5.13E-15 | -2.63127 | 1 | 1 Y_RNA      | -- |
| ENSG00000223273 | 5.13E-15 | -2.63127 | 1 | 1 RN7SKP172  | -- |
| ENSG00000223274 | 5.13E-15 | -2.63127 | 1 | 1 RNA5SP498  | -- |
| ENSG00000223275 | 5.13E-15 | -2.63127 | 1 | 1 AC006026.1 | -- |
| ENSG00000223280 | 5.13E-15 | -2.63127 | 1 | 1 RNU6-57P   | -- |
| ENSG00000223281 | 5.13E-15 | -2.63127 | 1 | 1 RN7SKP85   | -- |
| ENSG00000223282 | 5.13E-15 | -2.63127 | 1 | 1 RN7SKP165  | -- |
| ENSG00000223286 | 5.13E-15 | -2.63127 | 1 | 1 AL121952.1 | -- |
| ENSG00000223287 | 5.13E-15 | -2.63127 | 1 | 1 RNU6-954P  | -- |
| ENSG00000223290 | 5.13E-15 | -2.63127 | 1 | 1 RNA5SP107  | -- |
| ENSG00000223291 | 5.13E-15 | -2.63127 | 1 | 1 AL354680.1 | -- |
| ENSG00000223293 | 5.13E-15 | -2.63127 | 1 | 1 RNA5SP270  | -- |
| ENSG00000223294 | 5.13E-15 | -2.63127 | 1 | 1 SNORD83    | -- |
| ENSG00000223297 | 5.13E-15 | -2.63127 | 1 | 1 AC116154.1 | -- |
| ENSG00000223299 | 5.13E-15 | -2.63127 | 1 | 1 RN7SKP108  | -- |
| ENSG00000223302 | 5.13E-15 | -2.63127 | 1 | 1 Y_RNA      | -- |
| ENSG00000223305 | 5.13E-15 | -2.63127 | 1 | 1 RN7SKP30   | -- |
| ENSG00000223306 | 5.13E-15 | -2.63127 | 1 | 1 RNU6-1304P | -- |
| ENSG00000223307 | 5.13E-15 | -2.63127 | 1 | 1 AC119674.1 | -- |
| ENSG00000223308 | 5.13E-15 | -2.63127 | 1 | 1 RN7SKP101  | -- |
| ENSG00000223309 | 5.13E-15 | -2.63127 | 1 | 1 RNU6-722P  | -- |
| ENSG00000223315 | 5.13E-15 | -2.63127 | 1 | 1 RN7SKP279  | -- |
| ENSG00000223316 | 5.13E-15 | -2.63127 | 1 | 1 AC027281.1 | -- |
| ENSG00000223318 | 5.13E-15 | -2.63127 | 1 | 1 RNA5SP111  | -- |
| ENSG00000223321 | 5.13E-15 | -2.63127 | 1 | 1 RN7SKP293  | -- |
| ENSG00000223322 | 5.13E-15 | -2.63127 | 1 | 1 AL033378.1 | -- |
| ENSG00000223324 | 5.13E-15 | -2.63127 | 1 | 1 RN7SKP273  | -- |
| ENSG00000223327 | 5.13E-15 | -2.63127 | 1 | 1 RNU2-71P   | -- |
| ENSG00000223330 | 5.13E-15 | -2.63127 | 1 | 1 RNU6-1052P | -- |
| ENSG00000223335 | 5.13E-15 | -2.63127 | 1 | 1 RNU6-603P  | -- |

|                 |          |          |   |                 |        |
|-----------------|----------|----------|---|-----------------|--------|
| ENSG00000223336 | 5.13E-15 | -2.63127 | 1 | 1 RNU2-6P       | -      |
| ENSG00000223341 | 5.13E-15 | -2.63127 | 1 | 1 RN7SKP3       | -      |
| ENSG00000223342 | 5.13E-15 | -2.63127 | 1 | 1 RP3-429O6.1   | -      |
| ENSG00000223343 | 5.13E-15 | -2.63127 | 1 | 1 RP13-131K19.2 | -      |
| ENSG00000223344 | 5.13E-15 | -2.63127 | 1 | 1 RP11-541F9.1  | -      |
| ENSG00000223345 | 5.13E-15 | -2.63127 | 1 | 1 HIST2H2BA     | K11252 |
| ENSG00000223349 | 5.13E-15 | -2.63127 | 1 | 1 KLF2P3        | K17845 |
| ENSG00000223350 | 5.13E-15 | -2.63127 | 1 | 1 IGLV9-49      | K06553 |
| ENSG00000223351 | 5.13E-15 | -2.63127 | 1 | 1 ZNF385D-AS2   | -      |
| ENSG00000223353 | 5.13E-15 | -2.63127 | 1 | 1 RP11-290P14.2 | -      |
| ENSG00000223358 | 5.13E-15 | -2.63127 | 1 | 1 EHHADH-AS1    | -      |
| ENSG00000223360 | 5.13E-15 | -2.63127 | 1 | 1 AC096559.2    | -      |
| ENSG00000223362 | 5.13E-15 | -2.63127 | 1 | 1 CDY15P        | K00653 |
| ENSG00000223368 | 5.13E-15 | -2.63127 | 1 | 1 RP11-401G5.1  | K18165 |
| ENSG00000223373 | 5.13E-15 | -2.63127 | 1 | 1 AC108066.1    | -      |
| ENSG00000223375 | 5.13E-15 | -2.63127 | 1 | 1 RP11-224O19.5 | K02976 |
| ENSG00000223377 | 5.13E-15 | -2.63127 | 1 | 1 RP5-1014O16.1 | -      |
| ENSG00000223379 | 5.13E-15 | -2.63127 | 1 | 1 RP11-374M1.4  | -      |
| ENSG00000223381 | 5.13E-15 | -2.63127 | 1 | 1 RP11-655H13.2 | -      |
| ENSG00000223382 | 5.13E-15 | -2.63127 | 1 | 1 RP1-65J11.1   | -      |
| ENSG00000223383 | 5.13E-15 | -2.63127 | 1 | 1 HIST1H2APS6   | -      |
| ENSG00000223387 | 5.13E-15 | -2.63127 | 1 | 1 RP11-408H1.3  | -      |
| ENSG00000223389 | 5.13E-15 | -2.63127 | 1 | 1 SDCBP2P1      | -      |
| ENSG00000223391 | 5.13E-15 | -2.63127 | 1 | 1 GS1-309P15.3  | K05762 |
| ENSG00000223392 | 5.13E-15 | -2.63127 | 1 | 1 CLDN10-AS1    | -      |
| ENSG00000223393 | 5.13E-15 | -2.63127 | 1 | 1 RP5-858B6.3   | -      |
| ENSG00000223394 | 5.13E-15 | -2.63127 | 1 | 1 TRBV29OR9-2   | -      |
| ENSG00000223395 | 5.13E-15 | -2.63127 | 1 | 1 RBM22P7       | -      |
| ENSG00000223398 | 5.13E-15 | -2.63127 | 1 | 1 AC027124.2    | -      |
| ENSG00000223400 | 5.13E-15 | -2.63127 | 1 | 1 AP006748.1    | -      |
| ENSG00000223402 | 5.13E-15 | -2.63127 | 1 | 1 AC074121.4    | K02976 |
| ENSG00000223403 | 5.13E-15 | -2.63127 | 1 | 1 MEG9          | -      |
| ENSG00000223406 | 5.13E-15 | -2.63127 | 1 | 1 XKRYP5        | -      |
| ENSG00000223407 | 5.13E-15 | -2.63127 | 1 | 1 USP9YP18      | -      |
| ENSG00000223408 | 5.13E-15 | -2.63127 | 1 | 1 RP11-38P6.1   | -      |
| ENSG00000223409 | 5.13E-15 | -2.63127 | 1 | 1 RPL17P17      | K02880 |
| ENSG00000223410 | 5.13E-15 | -2.63127 | 1 | 1 RP1-191L6.2   | -      |
| ENSG00000223417 | 5.13E-15 | -2.63127 | 1 | 1 TRIM49D1      | K12019 |
| ENSG00000223418 | 5.13E-15 | -2.63127 | 1 | 1 GS1-590J6.2   | K05744 |
| ENSG00000223419 | 5.13E-15 | -2.63127 | 1 | 1 AC006022.4    | -      |
| ENSG00000223421 | 5.13E-15 | -2.63127 | 1 | 1 RP11-572H4.1  | -      |
| ENSG00000223422 | 5.13E-15 | -2.63127 | 1 | 1 AC007274.2    | -      |
| ENSG00000223427 | 5.13E-15 | -2.63127 | 1 | 1 AC016716.1    | K13188 |
| ENSG00000223428 | 5.13E-15 | -2.63127 | 1 | 1 RP11-399K21.5 | -      |
| ENSG00000223429 | 5.13E-15 | -2.63127 | 1 | 1 RP4-800M22.2  | K12897 |
| ENSG00000223430 | 5.13E-15 | -2.63127 | 1 | 1 AC011243.1    | -      |
| ENSG00000223431 | 5.13E-15 | -2.63127 | 1 | 1 MTND6P21      | -      |
| ENSG00000223433 | 5.13E-15 | -2.63127 | 1 | 1 AC079767.3    | K02980 |
| ENSG00000223436 | 5.13E-15 | -2.63127 | 1 | 1 AC011625.1    | -      |
| ENSG00000223437 | 5.13E-15 | -2.63127 | 1 | 1 TMSB4XP3      | -      |
| ENSG00000223438 | 5.13E-15 | -2.63127 | 1 | 1 RP1-171K16.5  | -      |
| ENSG00000223440 | 5.13E-15 | -2.63127 | 1 | 1 RP11-555J4.4  | -      |
| ENSG00000223443 | 5.13E-15 | -2.63127 | 1 | 1 USP17L2       | K11845 |
| ENSG00000223445 | 5.13E-15 | -2.63127 | 1 | 1 RPL6P21       | K02934 |
| ENSG00000223446 | 5.13E-15 | -2.63127 | 1 | 1 RP11-274J16.5 | -      |
| ENSG00000223449 | 5.13E-15 | -2.63127 | 1 | 1 RP11-93P10.2  | -      |
| ENSG00000223450 | 5.13E-15 | -2.63127 | 1 | 1 RP11-52I18.1  | K02974 |
| ENSG00000223452 | 5.13E-15 | -2.63127 | 1 | 1 HMGN2P18      | K11300 |

|                 |          |          |   |                 |        |
|-----------------|----------|----------|---|-----------------|--------|
| ENSG00000223455 | 5.13E-15 | -2.63127 | 1 | 1 RP11-781P14.3 | K02925 |
| ENSG00000223457 | 5.13E-15 | -2.63127 | 1 | 1 HTATSF1P      | K13093 |
| ENSG00000223458 | 5.13E-15 | -2.63127 | 1 | 1 RP11-332E3.2  | -      |
| ENSG00000223460 | 5.13E-15 | -2.63127 | 1 | 1 GAPDHP69      | K00134 |
| ENSG00000223467 | 5.13E-15 | -2.63127 | 1 | 1 CALM1P1       | K02183 |
| ENSG00000223469 | 5.13E-15 | -2.63127 | 1 | 1 RP11-344J7.2  | -      |
| ENSG00000223470 | 5.13E-15 | -2.63127 | 1 | 1 RP11-490O24.2 | -      |
| ENSG00000223475 | 5.13E-15 | -2.63127 | 1 | 1 RP11-310H4.1  | -      |
| ENSG00000223476 | 5.13E-15 | -2.63127 | 1 | 1 VN1R42P       | -      |
| ENSG00000223479 | 5.13E-15 | -2.63127 | 1 | 1 RP4-788P17.1  | -      |
| ENSG00000223484 | 5.13E-15 | -2.63127 | 1 | 1 TRPC6P        | K04969 |
| ENSG00000223487 | 5.13E-15 | -2.63127 | 1 | 1 FRMPD4-AS1    | -      |
| ENSG00000223488 | 5.13E-15 | -2.63127 | 1 | 1 MAPK6PS2      | K06855 |
| ENSG00000223489 | 5.13E-15 | -2.63127 | 1 | 1 NEFHP1        | K04574 |
| ENSG00000223490 | 5.13E-15 | -2.63127 | 1 | 1 CHCHD2P5      | -      |
| ENSG00000223491 | 5.13E-15 | -2.63127 | 1 | 1 RP3-328E19.4  | -      |
| ENSG00000223495 | 5.13E-15 | -2.63127 | 1 | 1 RP11-763B22.7 | K14958 |
| ENSG00000223497 | 5.13E-15 | -2.63127 | 1 | 1 AC063979.1    | K11252 |
| ENSG00000223498 | 5.13E-15 | -2.63127 | 1 | 1 RP11-716A19.3 | K15280 |
| ENSG00000223500 | 5.13E-15 | -2.63127 | 1 | 1 AC083862.6    | K11971 |
| ENSG00000223501 | 5.13E-15 | -2.63127 | 1 | 1 VPS52         | -      |
| ENSG00000223502 | 5.13E-15 | -2.63127 | 1 | 1 RP11-96B5.3   | -      |
| ENSG00000223503 | 5.13E-15 | -2.63127 | 1 | 1 RP11-29H23.6  | K06087 |
| ENSG00000223504 | 5.13E-15 | -2.63127 | 1 | 1 RP11-542F9.1  | -      |
| ENSG00000223506 | 5.13E-15 | -2.63127 | 1 | 1 SLC20A1P1     | K14640 |
| ENSG00000223512 | 5.13E-15 | -2.63127 | 1 | 1 BX649597.3    | -      |
| ENSG00000223513 | 5.13E-15 | -2.63127 | 1 | 1 ATP6V0E1P2    | K02153 |
| ENSG00000223514 | 5.13E-15 | -2.63127 | 1 | 1 AC004866.1    | -      |
| ENSG00000223516 | 5.13E-15 | -2.63127 | 1 | 1 AFF2-IT1      | -      |
| ENSG00000223517 | 5.13E-15 | -2.63127 | 1 | 1 AC010723.1    | -      |
| ENSG00000223518 | 5.13E-15 | -2.63127 | 1 | 1 CSNK1A1P1     | K08957 |
| ENSG00000223523 | 5.13E-15 | -2.63127 | 1 | 1 AC079613.1    | -      |
| ENSG00000223524 | 5.13E-15 | -2.63127 | 1 | 1 REXO1L11P     | K14570 |
| ENSG00000223525 | 5.13E-15 | -2.63127 | 1 | 1 RABGAP1L-IT1  | -      |
| ENSG00000223529 | 5.13E-15 | -2.63127 | 1 | 1 EEF1A1P8      | K03231 |
| ENSG00000223530 | 5.13E-15 | -2.63127 | 1 | 1 AC012506.1    | -      |
| ENSG00000223534 | 5.13E-15 | -2.63127 | 1 | 1 HLA-DQB1-AS1  | -      |
| ENSG00000223535 | 5.13E-15 | -2.63127 | 1 | 1 FAM90A17P     | -      |
| ENSG00000223536 | 5.13E-15 | -2.63127 | 1 | 1 AC008069.1    | -      |
| ENSG00000223537 | 5.13E-15 | -2.63127 | 1 | 1 RP5-919F19.5  | -      |
| ENSG00000223538 | 5.13E-15 | -2.63127 | 1 | 1 RP11-216P16.6 | K02866 |
| ENSG00000223539 | 5.13E-15 | -2.63127 | 1 | 1 AC011431.1    | -      |
| ENSG00000223540 | 5.13E-15 | -2.63127 | 1 | 1 RPS15AP5      | K02957 |
| ENSG00000223542 | 5.13E-15 | -2.63127 | 1 | 1 RP1-283K11.3  | -      |
| ENSG00000223543 | 5.13E-15 | -2.63127 | 1 | 1 TCEAL4P1      | -      |
| ENSG00000223544 | 5.13E-15 | -2.63127 | 1 | 1 AC005838.2    | K02257 |
| ENSG00000223547 | 5.13E-15 | -2.63127 | 1 | 1 ZNF844        | K09228 |
| ENSG00000223548 | 5.13E-15 | -2.63127 | 1 | 1 AC034228.3    | -      |
| ENSG00000223549 | 5.13E-15 | -2.63127 | 1 | 1 MTND5P28      | K03883 |
| ENSG00000223550 | 5.13E-15 | -2.63127 | 1 | 1 SNRPBP1       | K11086 |
| ENSG00000223553 | 5.13E-15 | -2.63127 | 1 | 1 SMPD4P1       | K12353 |
| ENSG00000223554 | 5.13E-15 | -2.63127 | 1 | 1 AC078851.1    | -      |
| ENSG00000223555 | 5.13E-15 | -2.63127 | 1 | 1 USP9YP23      | -      |
| ENSG00000223558 | 5.13E-15 | -2.63127 | 1 | 1 TRIM60P17     | K12029 |
| ENSG00000223561 | 5.13E-15 | -2.63127 | 1 | 1 AC003090.1    | -      |
| ENSG00000223562 | 5.13E-15 | -2.63127 | 1 | 1 RP11-543B16.3 | -      |
| ENSG00000223563 | 5.13E-15 | -2.63127 | 1 | 1 AP001601.2    | -      |
| ENSG00000223564 | 5.13E-15 | -2.63127 | 1 | 1 CYP4F32P      | K17730 |

|                 |          |          |   |                 |        |
|-----------------|----------|----------|---|-----------------|--------|
| ENSG00000223565 | 5.13E-15 | -2.63127 | 1 | 1 RP11-344L13.1 | -      |
| ENSG00000223566 | 5.13E-15 | -2.63127 | 1 | 1 TNRC18P2      | -      |
| ENSG00000223568 | 5.13E-15 | -2.63127 | 1 | 1 RPL3P11       | K02925 |
| ENSG00000223569 | 5.13E-15 | -2.63127 | 1 | 1 USP17L15      | K11845 |
| ENSG00000223570 | 5.13E-15 | -2.63127 | 1 | 1 RP11-275I14.2 | K02915 |
| ENSG00000223574 | 5.13E-15 | -2.63127 | 1 | 1 TPMTP4        | K00569 |
| ENSG00000223576 | 5.13E-15 | -2.63127 | 1 | 1 RP11-61K9.2   | -      |
| ENSG00000223579 | 5.13E-15 | -2.63127 | 1 | 1 AC011718.2    | -      |
| ENSG00000223581 | 5.13E-15 | -2.63127 | 1 | 1 RP11-393K12.2 | -      |
| ENSG00000223583 | 5.13E-15 | -2.63127 | 1 | 1 RP3-476K8.4   | K02880 |
| ENSG00000223584 | 5.13E-15 | -2.63127 | 1 | 1 TVP23CP1      | -      |
| ENSG00000223586 | 5.13E-15 | -2.63127 | 1 | 1 RP4-662A9.2   | -      |
| ENSG00000223587 | 5.13E-15 | -2.63127 | 1 | 1 AY269186.1    | -      |
| ENSG00000223588 | 5.13E-15 | -2.63127 | 1 | 1 AC103564.9    | -      |
| ENSG00000223589 | 5.13E-15 | -2.63127 | 1 | 1 RP5-884C9.3   | K09570 |
| ENSG00000223591 | 5.13E-15 | -2.63127 | 1 | 1 CENPVP1       | -      |
| ENSG00000223592 | 5.13E-15 | -2.63127 | 1 | 1 FNDC3CP       | -      |
| ENSG00000223593 | 5.13E-15 | -2.63127 | 1 | 1 AL356806.3    | K16949 |
| ENSG00000223595 | 5.13E-15 | -2.63127 | 1 | 1 LYPLA1P1      | K06128 |
| ENSG00000223597 | 5.13E-15 | -2.63127 | 1 | 1 CTD-2296D1.5  | -      |
| ENSG00000223598 | 5.13E-15 | -2.63127 | 1 | 1 RP1-292B18.4  | -      |
| ENSG00000223599 | 5.13E-15 | -2.63127 | 1 | 1 RP11-216N14.7 | K17284 |
| ENSG00000223600 | 5.13E-15 | -2.63127 | 1 | 1 EEF1A1P41     | -      |
| ENSG00000223601 | 5.13E-15 | -2.63127 | 1 | 1 EBLN1         | -      |
| ENSG00000223602 | 5.13E-15 | -2.63127 | 1 | 1 AC125634.1    | K17299 |
| ENSG00000223603 | 5.13E-15 | -2.63127 | 1 | 1 CRPP1         | K16143 |
| ENSG00000223604 | 5.13E-15 | -2.63127 | 1 | 1 AC007394.3    | -      |
| ENSG00000223605 | 5.13E-15 | -2.63127 | 1 | 1 AC107399.1    | -      |
| ENSG00000223608 | 5.13E-15 | -2.63127 | 1 | 1 DSCR4-IT1     | -      |
| ENSG00000223609 | 5.13E-15 | -2.63127 | 1 | 1 HBD           | K16151 |
| ENSG00000223611 | 5.13E-15 | -2.63127 | 1 | 1 SUPT20HL2     | -      |
| ENSG00000223612 | 5.13E-15 | -2.63127 | 1 | 1 RP11-289I10.2 | -      |
| ENSG00000223614 | 5.13E-15 | -2.63127 | 1 | 1 RP11-468B6.1  | K09228 |
| ENSG00000223615 | 5.13E-15 | -2.63127 | 1 | 1 RP11-196I18.2 | -      |
| ENSG00000223619 | 5.13E-15 | -2.63127 | 1 | 1 AC009960.1    | K02256 |
| ENSG00000223620 | 5.13E-15 | -2.63127 | 1 | 1 RBM48P1       | -      |
| ENSG00000223621 | 5.13E-15 | -2.63127 | 1 | 1 AK4P4         | K00939 |
| ENSG00000223622 | 5.13E-15 | -2.63127 | 1 | 1 GSTA6P        | K00799 |
| ENSG00000223623 | 5.13E-15 | -2.63127 | 1 | 1 RP3-425P12.1  | -      |
| ENSG00000223624 | 5.13E-15 | -2.63127 | 1 | 1 RP1-125I3.4   | K02924 |
| ENSG00000223625 | 5.13E-15 | -2.63127 | 1 | 1 CYCSP32       | K08738 |
| ENSG00000223626 | 5.13E-15 | -2.63127 | 1 | 1 LINC01044     | -      |
| ENSG00000223628 | 5.13E-15 | -2.63127 | 1 | 1 AC023449.2    | K02924 |
| ENSG00000223629 | 5.13E-15 | -2.63127 | 1 | 1 DEFA8P        | K05230 |
| ENSG00000223631 | 5.13E-15 | -2.63127 | 1 | 1 LINC01120     | -      |
| ENSG00000223633 | 5.13E-15 | -2.63127 | 1 | 1 RP11-143A22.1 | -      |
| ENSG00000223636 | 5.13E-15 | -2.63127 | 1 | 1 UBE2Q2P5Y     | K10582 |
| ENSG00000223637 | 5.13E-15 | -2.63127 | 1 | 1 RBMY2EP       | K12885 |
| ENSG00000223638 | 5.13E-15 | -2.63127 | 1 | 1 RFPL4A        | -      |
| ENSG00000223640 | 5.13E-15 | -2.63127 | 1 | 1 RPL30P3       | K02908 |
| ENSG00000223641 | 5.13E-15 | -2.63127 | 1 | 1 TTTY17C       | -      |
| ENSG00000223642 | 5.13E-15 | -2.63127 | 1 | 1 AC008277.1    | -      |
| ENSG00000223643 | 5.13E-15 | -2.63127 | 1 | 1 RP11-108M9.1  | -      |
| ENSG00000223646 | 5.13E-15 | -2.63127 | 1 | 1 AC002463.3    | -      |
| ENSG00000223647 | 5.13E-15 | -2.63127 | 1 | 1 AL133249.1    | -      |
| ENSG00000223648 | 5.13E-15 | -2.63127 | 1 | 1 IGHV3-64      | K06856 |
| ENSG00000223649 | 5.13E-15 | -2.63127 | 1 | 1 RP11-359E8.3  | -      |
| ENSG00000223650 | 5.13E-15 | -2.63127 | 1 | 1 UHRF2P1       | K15713 |

|                 |          |          |   |                 |        |
|-----------------|----------|----------|---|-----------------|--------|
| ENSG00000223651 | 5.13E-15 | -2.63127 | 1 | 1 RP5-1121H13.1 | K04574 |
| ENSG00000223655 | 5.13E-15 | -2.63127 | 1 | 1 RAB9AP3       | K07899 |
| ENSG00000223657 | 5.13E-15 | -2.63127 | 1 | 1 KRT8P51       | K07605 |
| ENSG00000223658 | 5.13E-15 | -2.63127 | 1 | 1 AC011242.6    | K09653 |
| ENSG00000223659 | 5.13E-15 | -2.63127 | 1 | 1 RP5-857K21.5  | -      |
| ENSG00000223660 | 5.13E-15 | -2.63127 | 1 | 1 AC012314.20   | -      |
| ENSG00000223662 | 5.13E-15 | -2.63127 | 1 | 1 SAMSN1-AS1    | -      |
| ENSG00000223663 | 5.13E-15 | -2.63127 | 1 | 1 RP5-890O3.3   | K03960 |
| ENSG00000223664 | 5.13E-15 | -2.63127 | 1 | 1 AL162415.4    | -      |
| ENSG00000223665 | 5.13E-15 | -2.63127 | 1 | 1 CTB-111F10.1  | -      |
| ENSG00000223668 | 5.13E-15 | -2.63127 | 1 | 1 EEF1A1P24     | K03231 |
| ENSG00000223671 | 5.13E-15 | -2.63127 | 1 | 1 RPL34P3       | K02915 |
| ENSG00000223672 | 5.13E-15 | -2.63127 | 1 | 1 RP11-272P10.3 | -      |
| ENSG00000223675 | 5.13E-15 | -2.63127 | 1 | 1 RP11-86H7.6   | -      |
| ENSG00000223676 | 5.13E-15 | -2.63127 | 1 | 1 RPL34P26      | K02915 |
| ENSG00000223677 | 5.13E-15 | -2.63127 | 1 | 1 OR2AD1P       | K04257 |
| ENSG00000223679 | 5.13E-15 | -2.63127 | 1 | 1 AP000362.1    | -      |
| ENSG00000223683 | 5.13E-15 | -2.63127 | 1 | 1 AL138935.1    | K02998 |
| ENSG00000223684 | 5.13E-15 | -2.63127 | 1 | 1 IFNWP18       | K05440 |
| ENSG00000223685 | 5.13E-15 | -2.63127 | 1 | 1 LINC00571     | -      |
| ENSG00000223688 | 5.13E-15 | -2.63127 | 1 | 1 RPS24P14      | K02974 |
| ENSG00000223691 | 5.13E-15 | -2.63127 | 1 | 1 AC068044.1    | K01557 |
| ENSG00000223694 | 5.13E-15 | -2.63127 | 1 | 1 ADH5P3        | K00121 |
| ENSG00000223698 | 5.13E-15 | -2.63127 | 1 | 1 GOLGA6L11P    | K10595 |
| ENSG00000223700 | 5.13E-15 | -2.63127 | 1 | 1 AC104395.1    | -      |
| ENSG00000223702 | 5.13E-15 | -2.63127 | 1 | 1 ZDHHC20P2     | -      |
| ENSG00000223707 | 5.13E-15 | -2.63127 | 1 | 1 RP1-93L7.3    | -      |
| ENSG00000223709 | 5.13E-15 | -2.63127 | 1 | 1 TRIM64EP      | K12019 |
| ENSG00000223710 | 5.13E-15 | -2.63127 | 1 | 1 CRYGGP        | -      |
| ENSG00000223715 | 5.13E-15 | -2.63127 | 1 | 1 RP11-71G7.1   | -      |
| ENSG00000223716 | 5.13E-15 | -2.63127 | 1 | 1 RP11-113O24.3 | -      |
| ENSG00000223717 | 5.13E-15 | -2.63127 | 1 | 1 DNAJA1P1      | K09502 |
| ENSG00000223719 | 5.13E-15 | -2.63127 | 1 | 1 AC024162.2    | -      |
| ENSG00000223720 | 5.13E-15 | -2.63127 | 1 | 1 RP5-1024N4.2  | -      |
| ENSG00000223721 | 5.13E-15 | -2.63127 | 1 | 1 UQCRFS1P2     | K00411 |
| ENSG00000223723 | 5.13E-15 | -2.63127 | 1 | 1 BX842568.2    | K04683 |
| ENSG00000223725 | 5.13E-15 | -2.63127 | 1 | 1 AC007879.5    | -      |
| ENSG00000223726 | 5.13E-15 | -2.63127 | 1 | 1 CTA-929C8.7   | -      |
| ENSG00000223727 | 5.13E-15 | -2.63127 | 1 | 1 AC026188.1    | -      |
| ENSG00000223728 | 5.13E-15 | -2.63127 | 1 | 1 RP11-314N2.2  | -      |
| ENSG00000223729 | 5.13E-15 | -2.63127 | 1 | 1 RP11-145E17.2 | -      |
| ENSG00000223730 | 5.13E-15 | -2.63127 | 1 | 1 RP1-127B20.4  | K02934 |
| ENSG00000223731 | 5.13E-15 | -2.63127 | 1 | 1 SUPT20HL1     | -      |
| ENSG00000223732 | 5.13E-15 | -2.63127 | 1 | 1 RP11-321C24.1 | -      |
| ENSG00000223733 | 5.13E-15 | -2.63127 | 1 | 1 RPL18AP14     | K02882 |
| ENSG00000223735 | 5.13E-15 | -2.63127 | 1 | 1 OR51B3P       | K04257 |
| ENSG00000223738 | 5.13E-15 | -2.63127 | 1 | 1 RP11-781E19.1 | K04079 |
| ENSG00000223739 | 5.13E-15 | -2.63127 | 1 | 1 AC007389.2    | K02957 |
| ENSG00000223740 | 5.13E-15 | -2.63127 | 1 | 1 RP11-760D2.4  | -      |
| ENSG00000223741 | 5.13E-15 | -2.63127 | 1 | 1 PSMD4P1       | K03029 |
| ENSG00000223742 | 5.13E-15 | -2.63127 | 1 | 1 RP11-149B9.2  | -      |
| ENSG00000223744 | 5.13E-15 | -2.63127 | 1 | 1 RBMY2GP       | K12885 |
| ENSG00000223746 | 5.13E-15 | -2.63127 | 1 | 1 TCEB1P30      | K03872 |
| ENSG00000223750 | 5.13E-15 | -2.63127 | 1 | 1 SIRPB3P       | K06551 |
| ENSG00000223751 | 5.13E-15 | -2.63127 | 1 | 1 AC116609.2    | -      |
| ENSG00000223753 | 5.13E-15 | -2.63127 | 1 | 1 GHc-602D8.2   | -      |
| ENSG00000223754 | 5.13E-15 | -2.63127 | 1 | 1 AC008073.9    | -      |
| ENSG00000223758 | 5.13E-15 | -2.63127 | 1 | 1 RP11-347J14.4 | -      |

|                 |          |          |   |                 |        |
|-----------------|----------|----------|---|-----------------|--------|
| ENSG00000223759 | 5.13E-15 | -2.63127 | 1 | 1 RP11-353N4.4  | —      |
| ENSG00000223760 | 5.13E-15 | -2.63127 | 1 | 1 MED15P9       | K04613 |
| ENSG00000223761 | 5.13E-15 | -2.63127 | 1 | 1 RP11-57C13.4  | —      |
| ENSG00000223765 | 5.13E-15 | -2.63127 | 1 | 1 RP1-288M22.2  | —      |
| ENSG00000223770 | 5.13E-15 | -2.63127 | 1 | 1 MIR1255B1     | —      |
| ENSG00000223772 | 5.13E-15 | -2.63127 | 1 | 1 GEMIN8P3      | K13136 |
| ENSG00000223774 | 5.13E-15 | -2.63127 | 1 | 1 RP11-307B6.3  | —      |
| ENSG00000223776 | 5.13E-15 | -2.63127 | 1 | 1 LGALS8-AS1    | —      |
| ENSG00000223777 | 5.13E-15 | -2.63127 | 1 | 1 AC092162.2    | K02905 |
| ENSG00000223780 | 5.13E-15 | -2.63127 | 1 | 1 MEP1AP2       | K01395 |
| ENSG00000223781 | 5.13E-15 | -2.63127 | 1 | 1 RP11-95K23.6  | —      |
| ENSG00000223782 | 5.13E-15 | -2.63127 | 1 | 1 RPS21P8       | —      |
| ENSG00000223783 | 5.13E-15 | -2.63127 | 1 | 1 AC124944.5    | —      |
| ENSG00000223786 | 5.13E-15 | -2.63127 | 1 | 1 RP11-554D15.1 | —      |
| ENSG00000223788 | 5.13E-15 | -2.63127 | 1 | 1 DIS3L2P1      | K18758 |
| ENSG00000223794 | 5.13E-15 | -2.63127 | 1 | 1 COX5BP8       | —      |
| ENSG00000223795 | 5.13E-15 | -2.63127 | 1 | 1 RP11-473E2.2  | —      |
| ENSG00000223800 | 5.13E-15 | -2.63127 | 1 | 1 RP11-598C10.2 | —      |
| ENSG00000223807 | 5.13E-15 | -2.63127 | 1 | 1 RP11-562M8.4  | —      |
| ENSG00000223808 | 5.13E-15 | -2.63127 | 1 | 1 RP11-428L9.2  | —      |
| ENSG00000223809 | 5.13E-15 | -2.63127 | 1 | 1 RP11-85L21.6  | —      |
| ENSG00000223810 | 5.13E-15 | -2.63127 | 1 | 1 KRT8P28       | K07605 |
| ENSG00000223811 | 5.13E-15 | -2.63127 | 1 | 1 RP11-437J19.1 | —      |
| ENSG00000223812 | 5.13E-15 | -2.63127 | 1 | 1 RP11-197K6.1  | —      |
| ENSG00000223813 | 5.13E-15 | -2.63127 | 1 | 1 AC007255.8    | —      |
| ENSG00000223814 | 5.13E-15 | -2.63127 | 1 | 1 RP11-543D5.2  | —      |
| ENSG00000223815 | 5.13E-15 | -2.63127 | 1 | 1 DIAPH3-AS2    | —      |
| ENSG00000223816 | 5.13E-15 | -2.63127 | 1 | 1 IGKV1OR2-2    | —      |
| ENSG00000223817 | 5.13E-15 | -2.63127 | 1 | 1 CDH23-AS1     | —      |
| ENSG00000223819 | 5.13E-15 | -2.63127 | 1 | 1 RP3-347M6.1   | K03767 |
| ENSG00000223822 | 5.13E-15 | -2.63127 | 1 | 1 EEF1A1P1      | K03231 |
| ENSG00000223823 | 5.13E-15 | -2.63127 | 1 | 1 RP11-465B22.5 | —      |
| ENSG00000223824 | 5.13E-15 | -2.63127 | 1 | 1 AC019178.3    | K11110 |
| ENSG00000223826 | 5.13E-15 | -2.63127 | 1 | 1 AC092570.2    | —      |
| ENSG00000223828 | 5.13E-15 | -2.63127 | 1 | 1 BANF1P4       | —      |
| ENSG00000223831 | 5.13E-15 | -2.63127 | 1 | 1 RP1-56J10.8   | —      |
| ENSG00000223834 | 5.13E-15 | -2.63127 | 1 | 1 RP11-472N13.2 | —      |
| ENSG00000223836 | 5.13E-15 | -2.63127 | 1 | 1 RP11-548K12.2 | —      |
| ENSG00000223837 | 5.13E-15 | -2.63127 | 1 | 1 BRD2-IT1      | —      |
| ENSG00000223838 | 5.13E-15 | -2.63127 | 1 | 1 AC007091.1    | —      |
| ENSG00000223839 | 5.13E-15 | -2.63127 | 1 | 1 FAM95B1       | —      |
| ENSG00000223841 | 5.13E-15 | -2.63127 | 1 | 1 RP11-448K10.1 | K04404 |
| ENSG00000223842 | 5.13E-15 | -2.63127 | 1 | 1 RP11-135J2.3  | —      |
| ENSG00000223843 | 5.13E-15 | -2.63127 | 1 | 1 EFCAB6-AS1    | —      |
| ENSG00000223845 | 5.13E-15 | -2.63127 | 1 | 1 VN1R40P       | K04614 |
| ENSG00000223847 | 5.13E-15 | -2.63127 | 1 | 1 RP5-925F19.1  | —      |
| ENSG00000223850 | 5.13E-15 | -2.63127 | 1 | 1 MYCNUN        | —      |
| ENSG00000223856 | 5.13E-15 | -2.63127 | 1 | 1 RAB9AP2       | —      |
| ENSG00000223859 | 5.13E-15 | -2.63127 | 1 | 1 AC007403.3    | —      |
| ENSG00000223861 | 5.13E-15 | -2.63127 | 1 | 1 RP11-74C1.2   | K02947 |
| ENSG00000223863 | 5.13E-15 | -2.63127 | 1 | 1 AC008074.4    | —      |
| ENSG00000223865 | 5.13E-15 | -2.63127 | 1 | 1 HLA-DPB1      | K06752 |
| ENSG00000223866 | 5.13E-15 | -2.63127 | 1 | 1 AC002486.3    | —      |
| ENSG00000223869 | 5.13E-15 | -2.63127 | 1 | 1 RP11-323K10.1 | —      |
| ENSG00000223870 | 5.13E-15 | -2.63127 | 1 | 1 AP000233.3    | —      |
| ENSG00000223872 | 5.13E-15 | -2.63127 | 1 | 1 AC006372.5    | —      |
| ENSG00000223874 | 5.13E-15 | -2.63127 | 1 | 1 AC007557.1    | —      |
| ENSG00000223875 | 5.13E-15 | -2.63127 | 1 | 1 NBEAP3        | —      |

|                 |          |          |   |                 |        |
|-----------------|----------|----------|---|-----------------|--------|
| ENSG00000223876 | 5.13E-15 | -2.63127 | 1 | 1 RPS27P1       | K02978 |
| ENSG00000223877 | 5.13E-15 | -2.63127 | 1 | 1 RP11-2F9.3    | K02995 |
| ENSG00000223880 | 5.13E-15 | -2.63127 | 1 | 1 LINC01078     | -      |
| ENSG00000223881 | 5.13E-15 | -2.63127 | 1 | 1 RP11-553K8.2  | -      |
| ENSG00000223882 | 5.13E-15 | -2.63127 | 1 | 1 ABCC5-AS1     | -      |
| ENSG00000223883 | 5.13E-15 | -2.63127 | 1 | 1 RP11-424D14.1 | -      |
| ENSG00000223884 | 5.13E-15 | -2.63127 | 1 | 1 AC019048.1    | -      |
| ENSG00000223885 | 5.13E-15 | -2.63127 | 1 | 1 FAM90A13P     | -      |
| ENSG00000223889 | 5.13E-15 | -2.63127 | 1 | 1 RP11-73B2.3   | -      |
| ENSG00000223890 | 5.13E-15 | -2.63127 | 1 | 1 AC008171.1    | K10422 |
| ENSG00000223893 | 5.13E-15 | -2.63127 | 1 | 1 AC096568.3    | K14537 |
| ENSG00000223896 | 5.13E-15 | -2.63127 | 1 | 1 CCNJP2        | -      |
| ENSG00000223897 | 5.13E-15 | -2.63127 | 1 | 1 AC069157.1    | -      |
| ENSG00000223899 | 5.13E-15 | -2.63127 | 1 | 1 SEC13P1       | K14004 |
| ENSG00000223903 | 5.13E-15 | -2.63127 | 1 | 1 RPL23P4       | -      |
| ENSG00000223904 | 5.13E-15 | -2.63127 | 1 | 1 HMGB1P12      | K10802 |
| ENSG00000223905 | 5.13E-15 | -2.63127 | 1 | 1 RP11-335E14.1 | -      |
| ENSG00000223906 | 5.13E-15 | -2.63127 | 1 | 1 RP5-837M10.2  | -      |
| ENSG00000223907 | 5.13E-15 | -2.63127 | 1 | 1 RP11-439L8.4  | -      |
| ENSG00000223908 | 5.13E-15 | -2.63127 | 1 | 1 AC068657.2    | -      |
| ENSG00000223910 | 5.13E-15 | -2.63127 | 1 | 1 ZNF32-AS3     | -      |
| ENSG00000223911 | 5.13E-15 | -2.63127 | 1 | 1 AC009480.3    | -      |
| ENSG00000223912 | 5.13E-15 | -2.63127 | 1 | 1 EEF1A1P36     | K03231 |
| ENSG00000223914 | 5.13E-15 | -2.63127 | 1 | 1 AC079630.2    | -      |
| ENSG00000223915 | 5.13E-15 | -2.63127 | 1 | 1 DPPA2P1       | -      |
| ENSG00000223916 | 5.13E-15 | -2.63127 | 1 | 1 RP11-353H3.1  | K02882 |
| ENSG00000223917 | 5.13E-15 | -2.63127 | 1 | 1 AC009237.2    | K12019 |
| ENSG00000223918 | 5.13E-15 | -2.63127 | 1 | 1 RP13-461N9.2  | -      |
| ENSG00000223920 | 5.13E-15 | -2.63127 | 1 | 1 RP11-430G17.1 | K00072 |
| ENSG00000223921 | 5.13E-15 | -2.63127 | 1 | 1 MTND1P27      | K03878 |
| ENSG00000223925 | 5.13E-15 | -2.63127 | 1 | 1 SLC25A15P4    | K15101 |
| ENSG00000223928 | 5.13E-15 | -2.63127 | 1 | 1 RP11-183E9.2  | K14313 |
| ENSG00000223929 | 5.13E-15 | -2.63127 | 1 | 1 AC007381.2    | -      |
| ENSG00000223930 | 5.13E-15 | -2.63127 | 1 | 1 RP11-33A14.1  | -      |
| ENSG00000223931 | 5.13E-15 | -2.63127 | 1 | 1 AC142381.1    | K06856 |
| ENSG00000223940 | 5.13E-15 | -2.63127 | 1 | 1 KRT8P8        | K07605 |
| ENSG00000223941 | 5.13E-15 | -2.63127 | 1 | 1 LINC01014     | -      |
| ENSG00000223942 | 5.13E-15 | -2.63127 | 1 | 1 RP11-252P19.2 | -      |
| ENSG00000223944 | 5.13E-15 | -2.63127 | 1 | 1 RP5-1180C18.1 | -      |
| ENSG00000223945 | 5.13E-15 | -2.63127 | 1 | 1 RP11-458I7.1  | K02934 |
| ENSG00000223946 | 5.13E-15 | -2.63127 | 1 | 1 RP11-533O20.2 | -      |
| ENSG00000223948 | 5.13E-15 | -2.63127 | 1 | 1 RP11-421N10.1 | -      |
| ENSG00000223949 | 5.13E-15 | -2.63127 | 1 | 1 RP11-24J23.2  | -      |
| ENSG00000223951 | 5.13E-15 | -2.63127 | 1 | 1 AL133244.1    | K11251 |
| ENSG00000223953 | 5.13E-15 | -2.63127 | 1 | 1 C1QTNF5       | -      |
| ENSG00000223955 | 5.13E-15 | -2.63127 | 1 | 1 MTND6P1       | -      |
| ENSG00000223958 | 5.13E-15 | -2.63127 | 1 | 1 RP11-552J9.12 | K00819 |
| ENSG00000223962 | 5.13E-15 | -2.63127 | 1 | 1 UBBP3         | K04551 |
| ENSG00000223963 | 5.13E-15 | -2.63127 | 1 | 1 PRKRIRP8      | -      |
| ENSG00000223965 | 5.13E-15 | -2.63127 | 1 | 1 ZNF587P1      | K09228 |
| ENSG00000223966 | 5.13E-15 | -2.63127 | 1 | 1 RP11-141J10.2 | -      |
| ENSG00000223967 | 5.13E-15 | -2.63127 | 1 | 1 RP11-505P4.5  | -      |
| ENSG00000223968 | 5.13E-15 | -2.63127 | 1 | 1 AC098614.1    | K02978 |
| ENSG00000223969 | 5.13E-15 | -2.63127 | 1 | 1 AC002456.2    | -      |
| ENSG00000223970 | 5.13E-15 | -2.63127 | 1 | 1 RP11-598O8.1  | K14000 |
| ENSG00000223973 | 5.13E-15 | -2.63127 | 1 | 1 AC068491.3    | K16794 |
| ENSG00000223974 | 5.13E-15 | -2.63127 | 1 | 1 RP11-561N12.4 | K15464 |
| ENSG00000223976 | 5.13E-15 | -2.63127 | 1 | 1 EXTL2P1       | K02369 |

|                 |          |          |   |                    |        |
|-----------------|----------|----------|---|--------------------|--------|
| ENSG00000223977 | 5.13E-15 | -2.63127 | 1 | 1 AC138623.1       | K09228 |
| ENSG00000223978 | 5.13E-15 | -2.63127 | 1 | 1 ZNF736P1Y        | K09228 |
| ENSG00000223981 | 5.13E-15 | -2.63127 | 1 | 1 PHBP6            | -      |
| ENSG00000223982 | 5.13E-15 | -2.63127 | 1 | 1 SNRPD2P2         | K11096 |
| ENSG00000223983 | 5.13E-15 | -2.63127 | 1 | 1 RP11-12A20.8     | -      |
| ENSG00000223985 | 5.13E-15 | -2.63127 | 1 | 1 AC093326.1       | -      |
| ENSG00000223986 | 5.13E-15 | -2.63127 | 1 | 1 RP11-528A4.3     | K02266 |
| ENSG00000223987 | 5.13E-15 | -2.63127 | 1 | 1 RP11-445P17.5    | K02898 |
| ENSG00000223989 | 5.13E-15 | -2.63127 | 1 | 1 RP11-84A14.5     | -      |
| ENSG00000223991 | 5.13E-15 | -2.63127 | 1 | 1 AC104809.2       | -      |
| ENSG00000223993 | 5.13E-15 | -2.63127 | 1 | 1 RP11-475D12.1    | -      |
| ENSG00000223995 | 5.13E-15 | -2.63127 | 1 | 1 RPL32P35         | -      |
| ENSG00000223997 | 5.13E-15 | -2.63127 | 1 | 1 TRDD1            | -      |
| ENSG00000223999 | 5.13E-15 | -2.63127 | 1 | 1 LL22NC03-102D1.1 | -      |
| ENSG00000224000 | 5.13E-15 | -2.63127 | 1 | 1 RP3-471M13.2     | -      |
| ENSG00000224002 | 5.13E-15 | -2.63127 | 1 | 1 AC090099.2       | -      |
| ENSG00000224003 | 5.13E-15 | -2.63127 | 1 | 1 CTA-407F11.6     | K05705 |
| ENSG00000224004 | 5.13E-15 | -2.63127 | 1 | 1 ATP5C1P1         | K02136 |
| ENSG00000224007 | 5.13E-15 | -2.63127 | 1 | 1 AC019070.1       | K11842 |
| ENSG00000224008 | 5.13E-15 | -2.63127 | 1 | 1 RP5-1010E17.2    | -      |
| ENSG00000224011 | 5.13E-15 | -2.63127 | 1 | 1 AC111155.1       | K02929 |
| ENSG00000224012 | 5.13E-15 | -2.63127 | 1 | 1 RP11-756G12.1    | K10374 |
| ENSG00000224015 | 5.13E-15 | -2.63127 | 1 | 1 AC063976.3       | -      |
| ENSG00000224016 | 5.13E-15 | -2.63127 | 1 | 1 RP11-728K20.1    | K18584 |
| ENSG00000224017 | 5.13E-15 | -2.63127 | 1 | 1 AC005022.1       | -      |
| ENSG00000224018 | 5.13E-15 | -2.63127 | 1 | 1 AP000470.2       | -      |
| ENSG00000224019 | 5.13E-15 | -2.63127 | 1 | 1 RPL21P32         | K02889 |
| ENSG00000224025 | 5.13E-15 | -2.63127 | 1 | 1 RP11-274B18.3    | K01794 |
| ENSG00000224027 | 5.13E-15 | -2.63127 | 1 | 1 RP1-231P7P.1     | -      |
| ENSG00000224028 | 5.13E-15 | -2.63127 | 1 | 1 AC073928.2       | -      |
| ENSG00000224029 | 5.13E-15 | -2.63127 | 1 | 1 RP11-136K14.2    | -      |
| ENSG00000224031 | 5.13E-15 | -2.63127 | 1 | 1 TCEAL3-AS1       | -      |
| ENSG00000224033 | 5.13E-15 | -2.63127 | 1 | 1 CDY8P            | K00653 |
| ENSG00000224034 | 5.13E-15 | -2.63127 | 1 | 1 RP11-445P17.8    | -      |
| ENSG00000224035 | 5.13E-15 | -2.63127 | 1 | 1 SFPQP1           | K13219 |
| ENSG00000224036 | 5.13E-15 | -2.63127 | 1 | 1 CTSLP2           | K01365 |
| ENSG00000224037 | 5.13E-15 | -2.63127 | 1 | 1 RP4-781K5.7      | -      |
| ENSG00000224038 | 5.13E-15 | -2.63127 | 1 | 1 RP11-347J14.8    | -      |
| ENSG00000224039 | 5.13E-15 | -2.63127 | 1 | 1 AC091493.1       | K00653 |
| ENSG00000224040 | 5.13E-15 | -2.63127 | 1 | 1 HMGN1P4          | K11299 |
| ENSG00000224041 | 5.13E-15 | -2.63127 | 1 | 1 IGKV3D-15        | -      |
| ENSG00000224042 | 5.13E-15 | -2.63127 | 1 | 1 MTND4P6          | K03881 |
| ENSG00000224045 | 5.13E-15 | -2.63127 | 1 | 1 RP11-98L5.4      | -      |
| ENSG00000224048 | 5.13E-15 | -2.63127 | 1 | 1 AC104777.4       | -      |
| ENSG00000224050 | 5.13E-15 | -2.63127 | 1 | 1 RP1-90G24.6      | -      |
| ENSG00000224054 | 5.13E-15 | -2.63127 | 1 | 1 RP4-551E13.2     | K17492 |
| ENSG00000224055 | 5.13E-15 | -2.63127 | 1 | 1 GAPDHP55         | K00134 |
| ENSG00000224058 | 5.13E-15 | -2.63127 | 1 | 1 AC006509.7       | K09228 |
| ENSG00000224059 | 5.13E-15 | -2.63127 | 1 | 1 HSPA8P16         | K03283 |
| ENSG00000224060 | 5.13E-15 | -2.63127 | 1 | 1 ARSEP1           | K18222 |
| ENSG00000224061 | 5.13E-15 | -2.63127 | 1 | 1 AC092106.1       | K12892 |
| ENSG00000224062 | 5.13E-15 | -2.63127 | 1 | 1 TUBB4BP5         | K07375 |
| ENSG00000224064 | 5.13E-15 | -2.63127 | 1 | 1 RP11-344H11.5    | K02912 |
| ENSG00000224065 | 5.13E-15 | -2.63127 | 1 | 1 SRIP2            | -      |
| ENSG00000224069 | 5.13E-15 | -2.63127 | 1 | 1 CTD-2183H9.7     | -      |
| ENSG00000224070 | 5.13E-15 | -2.63127 | 1 | 1 HMGN1P6          | -      |
| ENSG00000224071 | 5.13E-15 | -2.63127 | 1 | 1 AC009474.1       | K17398 |
| ENSG00000224074 | 5.13E-15 | -2.63127 | 1 | 1 LINC00691        | -      |



|                 |          |          |   |                 |        |
|-----------------|----------|----------|---|-----------------|--------|
| ENSG00000224075 | 5.13E-15 | -2.63127 | 1 | 1 TTTY22        | -      |
| ENSG00000224076 | 5.13E-15 | -2.63127 | 1 | 1 AC009487.4    | -      |
| ENSG00000224082 | 5.13E-15 | -2.63127 | 1 | 1 UBTFL8        | K09273 |
| ENSG00000224087 | 5.13E-15 | -2.63127 | 1 | 1 AC018804.3    | -      |
| ENSG00000224089 | 5.13E-15 | -2.63127 | 1 | 1 CT47A10       | -      |
| ENSG00000224090 | 5.13E-15 | -2.63127 | 1 | 1 AC097468.4    | -      |
| ENSG00000224091 | 5.13E-15 | -2.63127 | 1 | 1 AC104389.16   | -      |
| ENSG00000224092 | 5.13E-15 | -2.63127 | 1 | 1 RP11-443B9.1  | -      |
| ENSG00000224095 | 5.13E-15 | -2.63127 | 1 | 1 AC108051.1    | -      |
| ENSG00000224099 | 5.13E-15 | -2.63127 | 1 | 1 AC064834.1    | -      |
| ENSG00000224101 | 5.13E-15 | -2.63127 | 1 | 1 ELMO1-AS1     | -      |
| ENSG00000224104 | 5.13E-15 | -2.63127 | 1 | 1 AC079809.2    | K12160 |
| ENSG00000224106 | 5.13E-15 | -2.63127 | 1 | 1 CYP4F25P      | K17726 |
| ENSG00000224107 | 5.13E-15 | -2.63127 | 1 | 1 LINC00633     | -      |
| ENSG00000224109 | 5.13E-15 | -2.63127 | 1 | 1 CENPVP3       | -      |
| ENSG00000224110 | 5.13E-15 | -2.63127 | 1 | 1 RP11-274M4.1  | K02835 |
| ENSG00000224114 | 5.13E-15 | -2.63127 | 1 | 1 RP11-343H5.4  | K02955 |
| ENSG00000224116 | 5.13E-15 | -2.63127 | 1 | 1 INHBA-AS1     | -      |
| ENSG00000224117 | 5.13E-15 | -2.63127 | 1 | 1 PTPN2P2       | K18026 |
| ENSG00000224121 | 5.13E-15 | -2.63127 | 1 | 1 ATG12P2       | K08336 |
| ENSG00000224122 | 5.13E-15 | -2.63127 | 1 | 1 POU6F2-AS1    | -      |
| ENSG00000224127 | 5.13E-15 | -2.63127 | 1 | 1 RP11-510C10.2 | -      |
| ENSG00000224128 | 5.13E-15 | -2.63127 | 1 | 1 AC107057.2    | -      |
| ENSG00000224129 | 5.13E-15 | -2.63127 | 1 | 1 DPPA2P2       | -      |
| ENSG00000224130 | 5.13E-15 | -2.63127 | 1 | 1 AP001652.1    | -      |
| ENSG00000224134 | 5.13E-15 | -2.63127 | 1 | 1 AC004866.3    | -      |
| ENSG00000224136 | 5.13E-15 | -2.63127 | 1 | 1 AC007568.1    | K12892 |
| ENSG00000224137 | 5.13E-15 | -2.63127 | 1 | 1 AC079767.4    | -      |
| ENSG00000224141 | 5.13E-15 | -2.63127 | 1 | 1 AL109763.2    | -      |
| ENSG00000224142 | 5.13E-15 | -2.63127 | 1 | 1 AMMECR1-IT1   | -      |
| ENSG00000224144 | 5.13E-15 | -2.63127 | 1 | 1 ASH2LP1       | K14964 |
| ENSG00000224149 | 5.13E-15 | -2.63127 | 1 | 1 RP11-510C10.3 | -      |
| ENSG00000224151 | 5.13E-15 | -2.63127 | 1 | 1 USP9YP28      | K11840 |
| ENSG00000224153 | 5.13E-15 | -2.63127 | 1 | 1 RP11-433C9.2  | -      |
| ENSG00000224157 | 5.13E-15 | -2.63127 | 1 | 1 HCG14         | -      |
| ENSG00000224159 | 5.13E-15 | -2.63127 | 1 | 1 HMGB1P9       | K10802 |
| ENSG00000224160 | 5.13E-15 | -2.63127 | 1 | 1 CICP10        | -      |
| ENSG00000224161 | 5.13E-15 | -2.63127 | 1 | 1 RPS26P54      | K02976 |
| ENSG00000224162 | 5.13E-15 | -2.63127 | 1 | 1 UQCRHP3       | K00416 |
| ENSG00000224163 | 5.13E-15 | -2.63127 | 1 | 1 RP11-309L24.6 | K04437 |
| ENSG00000224164 | 5.13E-15 | -2.63127 | 1 | 1 RP3-369A17.4  | -      |
| ENSG00000224166 | 5.13E-15 | -2.63127 | 1 | 1 PRYP1         | -      |
| ENSG00000224167 | 5.13E-15 | -2.63127 | 1 | 1 RP3-522D1.1   | -      |
| ENSG00000224169 | 5.13E-15 | -2.63127 | 1 | 1 HSFY6P        | -      |
| ENSG00000224172 | 5.13E-15 | -2.63127 | 1 | 1 RP11-416N13.1 | K06770 |
| ENSG00000224173 | 5.13E-15 | -2.63127 | 1 | 1 AC007422.1    | -      |
| ENSG00000224174 | 5.13E-15 | -2.63127 | 1 | 1 RP4-798A10.4  | -      |
| ENSG00000224184 | 5.13E-15 | -2.63127 | 1 | 1 AC096559.1    | -      |
| ENSG00000224185 | 5.13E-15 | -2.63127 | 1 | 1 SNX18P9       | K17923 |
| ENSG00000224187 | 5.13E-15 | -2.63127 | 1 | 1 RP11-132N15.3 | -      |
| ENSG00000224188 | 5.13E-15 | -2.63127 | 1 | 1 UBE2D3P4      | K06689 |
| ENSG00000224189 | 5.13E-15 | -2.63127 | 1 | 1 HOXD-AS1      | -      |
| ENSG00000224190 | 5.13E-15 | -2.63127 | 1 | 1 RP11-442O18.2 | -      |
| ENSG00000224192 | 5.13E-15 | -2.63127 | 1 | 1 RP11-259P1.1  | -      |
| ENSG00000224194 | 5.13E-15 | -2.63127 | 1 | 1 AC008278.3    | -      |
| ENSG00000224196 | 5.13E-15 | -2.63127 | 1 | 1 OR5AK4P       | -      |
| ENSG00000224198 | 5.13E-15 | -2.63127 | 1 | 1 RP4-604K5.2   | -      |
| ENSG00000224199 | 5.13E-15 | -2.63127 | 1 | 1 WI2-2994D6.1  | -      |

|                 |          |          |   |                 |        |
|-----------------|----------|----------|---|-----------------|--------|
| ENSG00000224201 | 5.13E-15 | -2.63127 | 1 | 1 PNMA6A        | -      |
| ENSG00000224203 | 5.13E-15 | -2.63127 | 1 | 1 RPS23P10      | K02973 |
| ENSG00000224204 | 5.13E-15 | -2.63127 | 1 | 1 PHEX-AS1      | -      |
| ENSG00000224205 | 5.13E-15 | -2.63127 | 1 | 1 AP000351.4    | K00799 |
| ENSG00000224207 | 5.13E-15 | -2.63127 | 1 | 1 RP11-10L12.1  | -      |
| ENSG00000224208 | 5.13E-15 | -2.63127 | 1 | 1 AL590762.6    | K13154 |
| ENSG00000224210 | 5.13E-15 | -2.63127 | 1 | 1 TRIM60P5Y     | -      |
| ENSG00000224215 | 5.13E-15 | -2.63127 | 1 | 1 RP11-371A19.2 | -      |
| ENSG00000224216 | 5.13E-15 | -2.63127 | 1 | 1 RP13-228J13.1 | -      |
| ENSG00000224217 | 5.13E-15 | -2.63127 | 1 | 1 RP11-232D9.1  | K08827 |
| ENSG00000224218 | 5.13E-15 | -2.63127 | 1 | 1 RP11-359D14.3 | -      |
| ENSG00000224219 | 5.13E-15 | -2.63127 | 1 | 1 AC074290.1    | K07342 |
| ENSG00000224220 | 5.13E-15 | -2.63127 | 1 | 1 AC104699.1    | -      |
| ENSG00000224222 | 5.13E-15 | -2.63127 | 1 | 1 RP11-262I2.2  | -      |
| ENSG00000224223 | 5.13E-15 | -2.63127 | 1 | 1 GS1-18A18.1   | -      |
| ENSG00000224224 | 5.13E-15 | -2.63127 | 1 | 1 HAUS1P2       | K16584 |
| ENSG00000224226 | 5.13E-15 | -2.63127 | 1 | 1 TBC1D3B       | K11837 |
| ENSG00000224227 | 5.13E-15 | -2.63127 | 1 | 1 OR2L1P        | K04257 |
| ENSG00000224228 | 5.13E-15 | -2.63127 | 1 | 1 RP1-15D23.2   | -      |
| ENSG00000224231 | 5.13E-15 | -2.63127 | 1 | 1 AC069394.1    | -      |
| ENSG00000224233 | 5.13E-15 | -2.63127 | 1 | 1 OR2J4P        | K04257 |
| ENSG00000224235 | 5.13E-15 | -2.63127 | 1 | 1 RP5-1027O11.1 | -      |
| ENSG00000224236 | 5.13E-15 | -2.63127 | 1 | 1 MRRFP1        | K02838 |
| ENSG00000224237 | 5.13E-15 | -2.63127 | 1 | 1 MINOS1P3      | K17784 |
| ENSG00000224239 | 5.13E-15 | -2.63127 | 1 | 1 AC090044.2    | -      |
| ENSG00000224240 | 5.13E-15 | -2.63127 | 1 | 1 CYCSP49       | K08738 |
| ENSG00000224243 | 5.13E-15 | -2.63127 | 1 | 1 LINC00403     | -      |
| ENSG00000224244 | 5.13E-15 | -2.63127 | 1 | 1 AC090283.3    | -      |
| ENSG00000224245 | 5.13E-15 | -2.63127 | 1 | 1 RP11-533K9.3  | K13539 |
| ENSG00000224247 | 5.13E-15 | -2.63127 | 1 | 1 AJ009632.3    | -      |
| ENSG00000224250 | 5.13E-15 | -2.63127 | 1 | 1 RP11-78A18.2  | -      |
| ENSG00000224251 | 5.13E-15 | -2.63127 | 1 | 1 RP11-499O7.7  | -      |
| ENSG00000224252 | 5.13E-15 | -2.63127 | 1 | 1 AC113618.2    | -      |
| ENSG00000224254 | 5.13E-15 | -2.63127 | 1 | 1 AC025627.4    | K02256 |
| ENSG00000224255 | 5.13E-15 | -2.63127 | 1 | 1 PDCL3P6       | -      |
| ENSG00000224256 | 5.13E-15 | -2.63127 | 1 | 1 CTA-292E10.7  | -      |
| ENSG00000224257 | 5.13E-15 | -2.63127 | 1 | 1 VWC2L-IT1     | -      |
| ENSG00000224260 | 5.13E-15 | -2.63127 | 1 | 1 RP1-272L16.1  | -      |
| ENSG00000224263 | 5.13E-15 | -2.63127 | 1 | 1 CYCSP12       | K08738 |
| ENSG00000224265 | 5.13E-15 | -2.63127 | 1 | 1 RP11-168L22.2 | -      |
| ENSG00000224267 | 5.13E-15 | -2.63127 | 1 | 1 RP11-149F8.5  | -      |
| ENSG00000224273 | 5.13E-15 | -2.63127 | 1 | 1 AC005077.7    | -      |
| ENSG00000224274 | 5.13E-15 | -2.63127 | 1 | 1 ENSAP1        | -      |
| ENSG00000224277 | 5.13E-15 | -2.63127 | 1 | 1 AP000345.2    | -      |
| ENSG00000224278 | 5.13E-15 | -2.63127 | 1 | 1 RP11-405P11.1 | K18655 |
| ENSG00000224279 | 5.13E-15 | -2.63127 | 1 | 1 RP1-199H16.6  | K02980 |
| ENSG00000224280 | 5.13E-15 | -2.63127 | 1 | 1 AC005014.5    | -      |
| ENSG00000224282 | 5.13E-15 | -2.63127 | 1 | 1 CTD-2290C23.1 | K02940 |
| ENSG00000224286 | 5.13E-15 | -2.63127 | 1 | 1 LINC01142     | -      |
| ENSG00000224288 | 5.13E-15 | -2.63127 | 1 | 1 AC013437.2    | K00412 |
| ENSG00000224289 | 5.13E-15 | -2.63127 | 1 | 1 IFIT6P        | K14217 |
| ENSG00000224291 | 5.13E-15 | -2.63127 | 1 | 1 AC012671.2    | K02923 |
| ENSG00000224292 | 5.13E-15 | -2.63127 | 1 | 1 AF196972.9    | -      |
| ENSG00000224295 | 5.13E-15 | -2.63127 | 1 | 1 AC087380.14   | -      |
| ENSG00000224296 | 5.13E-15 | -2.63127 | 1 | 1 MRPL49P1      | K17430 |
| ENSG00000224297 | 5.13E-15 | -2.63127 | 1 | 1 RP11-197P3.1  | -      |
| ENSG00000224298 | 5.13E-15 | -2.63127 | 1 | 1 AC069363.1    | -      |
| ENSG00000224299 | 5.13E-15 | -2.63127 | 1 | 1 AC007282.6    | -      |

|                 |          |          |   |                 |        |
|-----------------|----------|----------|---|-----------------|--------|
| ENSG00000224300 | 5.13E-15 | -2.63127 | 1 | 1 OR51P1P       | K04257 |
| ENSG00000224301 | 5.13E-15 | -2.63127 | 1 | 1 RP11-144G16.1 | -      |
| ENSG00000224302 | 5.13E-15 | -2.63127 | 1 | 1 RP11-302K17.3 | K03094 |
| ENSG00000224303 | 5.13E-15 | -2.63127 | 1 | 1 RP11-327I22.5 | -      |
| ENSG00000224307 | 5.13E-15 | -2.63127 | 1 | 1 RP11-344B5.2  | -      |
| ENSG00000224308 | 5.13E-15 | -2.63127 | 1 | 1 RP1-13P20.6   | -      |
| ENSG00000224309 | 5.13E-15 | -2.63127 | 1 | 1 ANKRD30BP2    | K17299 |
| ENSG00000224310 | 5.13E-15 | -2.63127 | 1 | 1 AC012317.1    | -      |
| ENSG00000224311 | 5.13E-15 | -2.63127 | 1 | 1 RP11-40H20.4  | -      |
| ENSG00000224312 | 5.13E-15 | -2.63127 | 1 | 1 MCCD1P2       | -      |
| ENSG00000224314 | 5.13E-15 | -2.63127 | 1 | 1 RP3-378P9.2   | -      |
| ENSG00000224316 | 5.13E-15 | -2.63127 | 1 | 1 RP11-479O9.2  | K03121 |
| ENSG00000224318 | 5.13E-15 | -2.63127 | 1 | 1 CHL1-AS2      | -      |
| ENSG00000224322 | 5.13E-15 | -2.63127 | 1 | 1 AC004009.3    | -      |
| ENSG00000224323 | 5.13E-15 | -2.63127 | 1 | 1 DPRXP1        | -      |
| ENSG00000224326 | 5.13E-15 | -2.63127 | 1 | 1 RP11-115A15.1 | -      |
| ENSG00000224328 | 5.13E-15 | -2.63127 | 1 | 1 MDC1-AS1      | -      |
| ENSG00000224329 | 5.13E-15 | -2.63127 | 1 | 1 LINC00297     | -      |
| ENSG00000224330 | 5.13E-15 | -2.63127 | 1 | 1 AC005019.3    | -      |
| ENSG00000224331 | 5.13E-15 | -2.63127 | 1 | 1 AC019181.3    | K02866 |
| ENSG00000224333 | 5.13E-15 | -2.63127 | 1 | 1 GAPDHP20      | K00134 |
| ENSG00000224334 | 5.13E-15 | -2.63127 | 1 | 1 AP000357.4    | K17260 |
| ENSG00000224335 | 5.13E-15 | -2.63127 | 1 | 1 RP11-301M17.2 | -      |
| ENSG00000224336 | 5.13E-15 | -2.63127 | 1 | 1 FAM197Y1      | -      |
| ENSG00000224337 | 5.13E-15 | -2.63127 | 1 | 1 FAM8A3P       | -      |
| ENSG00000224338 | 5.13E-15 | -2.63127 | 1 | 1 RP11-149P14.1 | K00412 |
| ENSG00000224339 | 5.13E-15 | -2.63127 | 1 | 1 AL121578.5    | K07750 |
| ENSG00000224340 | 5.13E-15 | -2.63127 | 1 | 1 RP11-496H15.2 | K02889 |
| ENSG00000224341 | 5.13E-15 | -2.63127 | 1 | 1 RP4-562J12.1  | K15303 |
| ENSG00000224342 | 5.13E-15 | -2.63127 | 1 | 1 AC007879.1    | -      |
| ENSG00000224344 | 5.13E-15 | -2.63127 | 1 | 1 KNOP1P3       | -      |
| ENSG00000224346 | 5.13E-15 | -2.63127 | 1 | 1 AC005037.1    | K18739 |
| ENSG00000224347 | 5.13E-15 | -2.63127 | 1 | 1 SCCEL-AS1     | -      |
| ENSG00000224348 | 5.13E-15 | -2.63127 | 1 | 1 RP11-306K13.1 | K02920 |
| ENSG00000224351 | 5.13E-15 | -2.63127 | 1 | 1 CDKN2AIPNLP3  | -      |
| ENSG00000224352 | 5.13E-15 | -2.63127 | 1 | 1 AC132479.4    | K08955 |
| ENSG00000224353 | 5.13E-15 | -2.63127 | 1 | 1 ACE3P         | K01283 |
| ENSG00000224354 | 5.13E-15 | -2.63127 | 1 | 1 MTND2P5       | K03879 |
| ENSG00000224357 | 5.13E-15 | -2.63127 | 1 | 1 ATG3P1        | -      |
| ENSG00000224359 | 5.13E-15 | -2.63127 | 1 | 1 RP11-467I20.2 | -      |
| ENSG00000224361 | 5.13E-15 | -2.63127 | 1 | 1 AC011239.1    | -      |
| ENSG00000224363 | 5.13E-15 | -2.63127 | 1 | 1 RP11-289H16.1 | -      |
| ENSG00000224365 | 5.13E-15 | -2.63127 | 1 | 1 RP11-252P18.1 | K05357 |
| ENSG00000224366 | 5.13E-15 | -2.63127 | 1 | 1 AC138472.4    | K06499 |
| ENSG00000224367 | 5.13E-15 | -2.63127 | 1 | 1 OACYLP        | -      |
| ENSG00000224368 | 5.13E-15 | -2.63127 | 1 | 1 RP11-73B2.5   | K08845 |
| ENSG00000224370 | 5.13E-15 | -2.63127 | 1 | 1 RP11-814E24.3 | -      |
| ENSG00000224371 | 5.13E-15 | -2.63127 | 1 | 1 RP11-235G24.1 | -      |
| ENSG00000224372 | 5.13E-15 | -2.63127 | 1 | 1 HLA-N         | K06751 |
| ENSG00000224373 | 5.13E-15 | -2.63127 | 1 | 1 IGHV4-59      | K06856 |
| ENSG00000224374 | 5.13E-15 | -2.63127 | 1 | 1 RP1-32B1.4    | -      |
| ENSG00000224375 | 5.13E-15 | -2.63127 | 1 | 1 AC009276.4    | -      |
| ENSG00000224382 | 5.13E-15 | -2.63127 | 1 | 1 LINC00703     | -      |
| ENSG00000224384 | 5.13E-15 | -2.63127 | 1 | 1 RP3-417O22.3  | -      |
| ENSG00000224387 | 5.13E-15 | -2.63127 | 1 | 1 RP3-395M20.2  | -      |
| ENSG00000224389 | 5.13E-15 | -2.63127 | 1 | 1 C4B           | K03989 |
| ENSG00000224391 | 5.13E-15 | -2.63127 | 1 | 1 AC073321.3    | -      |
| ENSG00000224394 | 5.13E-15 | -2.63127 | 1 | 1 GPC6-AS2      | -      |

|                 |          |          |   |                   |        |
|-----------------|----------|----------|---|-------------------|--------|
| ENSG00000224396 | 5.13E-15 | -2.63127 | 1 | 1 METTL15P3       | -      |
| ENSG00000224400 | 5.13E-15 | -2.63127 | 1 | 1 AC010880.1      | -      |
| ENSG00000224401 | 5.13E-15 | -2.63127 | 1 | 1 RPL7P57         | -      |
| ENSG00000224402 | 5.13E-15 | -2.63127 | 1 | 1 OR6D1P          | K04257 |
| ENSG00000224403 | 5.13E-15 | -2.63127 | 1 | 1 DPPA2P3         | -      |
| ENSG00000224404 | 5.13E-15 | -2.63127 | 1 | 1 LL22NC03-13G6.2 | -      |
| ENSG00000224405 | 5.13E-15 | -2.63127 | 1 | 1 LINC00572       | -      |
| ENSG00000224406 | 5.13E-15 | -2.63127 | 1 | 1 RP11-48F14.1    | -      |
| ENSG00000224407 | 5.13E-15 | -2.63127 | 1 | 1 RP5-956O18.3    | -      |
| ENSG00000224408 | 5.13E-15 | -2.63127 | 1 | 1 USP9YP22        | -      |
| ENSG00000224409 | 5.13E-15 | -2.63127 | 1 | 1 RP11-114B7.6    | -      |
| ENSG00000224410 | 5.13E-15 | -2.63127 | 1 | 1 AC097499.2      | K11424 |
| ENSG00000224412 | 5.13E-15 | -2.63127 | 1 | 1 RP11-351O1.3    | -      |
| ENSG00000224413 | 5.13E-15 | -2.63127 | 1 | 1 AP001476.2      | -      |
| ENSG00000224414 | 5.13E-15 | -2.63127 | 1 | 1 AC010886.2      | K16467 |
| ENSG00000224415 | 5.13E-15 | -2.63127 | 1 | 1 RPL19P12        | K02885 |
| ENSG00000224416 | 5.13E-15 | -2.63127 | 1 | 1 IFNA22P         | K05414 |
| ENSG00000224417 | 5.13E-15 | -2.63127 | 1 | 1 RP11-503C24.6   | -      |
| ENSG00000224419 | 5.13E-15 | -2.63127 | 1 | 1 KRT18P27        | K07604 |
| ENSG00000224421 | 5.13E-15 | -2.63127 | 1 | 1 ATP5J2LP        | K02130 |
| ENSG00000224425 | 5.13E-15 | -2.63127 | 1 | 1 AC073869.2      | -      |
| ENSG00000224426 | 5.13E-15 | -2.63127 | 1 | 1 SLC31A1P1       | K14686 |
| ENSG00000224427 | 5.13E-15 | -2.63127 | 1 | 1 AP000281.1      | K02866 |
| ENSG00000224430 | 5.13E-15 | -2.63127 | 1 | 1 MKRN5P          | K15687 |
| ENSG00000224435 | 5.13E-15 | -2.63127 | 1 | 1 NF1P6           | K08052 |
| ENSG00000224436 | 5.13E-15 | -2.63127 | 1 | 1 RP11-284L19.1   | -      |
| ENSG00000224438 | 5.13E-15 | -2.63127 | 1 | 1 RP4-816N1.1     | K02893 |
| ENSG00000224439 | 5.13E-15 | -2.63127 | 1 | 1 RP11-351M16.1   | K02998 |
| ENSG00000224440 | 5.13E-15 | -2.63127 | 1 | 1 CXorf51A        | -      |
| ENSG00000224441 | 5.13E-15 | -2.63127 | 1 | 1 AC068831.3      | -      |
| ENSG00000224442 | 5.13E-15 | -2.63127 | 1 | 1 AC017035.2      | K02930 |
| ENSG00000224443 | 5.13E-15 | -2.63127 | 1 | 1 AC006509.4      | -      |
| ENSG00000224445 | 5.13E-15 | -2.63127 | 1 | 1 RP11-413P11.1   | -      |
| ENSG00000224447 | 5.13E-15 | -2.63127 | 1 | 1 HIST1H1PS2      | -      |
| ENSG00000224448 | 5.13E-15 | -2.63127 | 1 | 1 GS1-259H13.7    | K07941 |
| ENSG00000224458 | 5.13E-15 | -2.63127 | 1 | 1 GUSBP6          | K04614 |
| ENSG00000224463 | 5.13E-15 | -2.63127 | 1 | 1 AC079354.6      | K02924 |
| ENSG00000224464 | 5.13E-15 | -2.63127 | 1 | 1 PGAM1P6         | K01834 |
| ENSG00000224465 | 5.13E-15 | -2.63127 | 1 | 1 SOCS2P2         | K04695 |
| ENSG00000224466 | 5.13E-15 | -2.63127 | 1 | 1 RP4-651E10.3    | -      |
| ENSG00000224467 | 5.13E-15 | -2.63127 | 1 | 1 AC009313.1      | -      |
| ENSG00000224469 | 5.13E-15 | -2.63127 | 1 | 1 AC009517.2      | K02883 |
| ENSG00000224471 | 5.13E-15 | -2.63127 | 1 | 1 RP11-522L3.6    | -      |
| ENSG00000224474 | 5.13E-15 | -2.63127 | 1 | 1 AL355490.1      | -      |
| ENSG00000224475 | 5.13E-15 | -2.63127 | 1 | 1 AC073900.4      | K02936 |
| ENSG00000224476 | 5.13E-15 | -2.63127 | 1 | 1 RPL36P16        | K02920 |
| ENSG00000224477 | 5.13E-15 | -2.63127 | 1 | 1 RP1-81D8.3      | -      |
| ENSG00000224478 | 5.13E-15 | -2.63127 | 1 | 1 RP11-13P5.1     | -      |
| ENSG00000224481 | 5.13E-15 | -2.63127 | 1 | 1 RP11-495P10.3   | -      |
| ENSG00000224482 | 5.13E-15 | -2.63127 | 1 | 1 HSFY4P          | -      |
| ENSG00000224484 | 5.13E-15 | -2.63127 | 1 | 1 RP11-548K12.4   | -      |
| ENSG00000224485 | 5.13E-15 | -2.63127 | 1 | 1 USP9YP7         | -      |
| ENSG00000224486 | 5.13E-15 | -2.63127 | 1 | 1 HCG19P          | -      |
| ENSG00000224488 | 5.13E-15 | -2.63127 | 1 | 1 RP11-492A12.2   | K07277 |
| ENSG00000224493 | 5.13E-15 | -2.63127 | 1 | 1 RP11-87O11.1    | -      |
| ENSG00000224494 | 5.13E-15 | -2.63127 | 1 | 1 HNRNPA3P14      | K12741 |
| ENSG00000224497 | 5.13E-15 | -2.63127 | 1 | 1 RPL36P4         | K02920 |
| ENSG00000224498 | 5.13E-15 | -2.63127 | 1 | 1 MAPKAPK5P1      | -      |

|                 |          |          |   |                  |        |
|-----------------|----------|----------|---|------------------|--------|
| ENSG00000224500 | 5.13E-15 | -2.63127 | 1 | 1 RP11-328K22.1  | -      |
| ENSG00000224503 | 5.13E-15 | -2.63127 | 1 | 1 AC104438.1     | K05610 |
| ENSG00000224504 | 5.13E-15 | -2.63127 | 1 | 1 RP11-475D12.2  | -      |
| ENSG00000224506 | 5.13E-15 | -2.63127 | 1 | 1 RP1-293L8.2    | -      |
| ENSG00000224509 | 5.13E-15 | -2.63127 | 1 | 1 AC010884.1     | -      |
| ENSG00000224510 | 5.13E-15 | -2.63127 | 1 | 1 POLR2KP2       | -      |
| ENSG00000224511 | 5.13E-15 | -2.63127 | 1 | 1 LINC00365      | -      |
| ENSG00000224512 | 5.13E-15 | -2.63127 | 1 | 1 AC021593.1     | -      |
| ENSG00000224513 | 5.13E-15 | -2.63127 | 1 | 1 AC109309.4     | -      |
| ENSG00000224515 | 5.13E-15 | -2.63127 | 1 | 1 RP11-5K23.5    | -      |
| ENSG00000224516 | 5.13E-15 | -2.63127 | 1 | 1 AC068134.8     | -      |
| ENSG00000224517 | 5.13E-15 | -2.63127 | 1 | 1 HTR2A-AS1      | -      |
| ENSG00000224518 | 5.13E-15 | -2.63127 | 1 | 1 AC006989.2     | K08738 |
| ENSG00000224519 | 5.13E-15 | -2.63127 | 1 | 1 HMGN1P19       | K11299 |
| ENSG00000224521 | 5.13E-15 | -2.63127 | 1 | 1 RP11-438F14.3  | -      |
| ENSG00000224523 | 5.13E-15 | -2.63127 | 1 | 1 RP13-52K8.1    | K14722 |
| ENSG00000224524 | 5.13E-15 | -2.63127 | 1 | 1 CYCSP42        | K08738 |
| ENSG00000224525 | 5.13E-15 | -2.63127 | 1 | 1 RP11-561I11.3  | -      |
| ENSG00000224529 | 5.13E-15 | -2.63127 | 1 | 1 AC093698.4     | K10755 |
| ENSG00000224530 | 5.13E-15 | -2.63127 | 1 | 1 PPIAP10        | K03767 |
| ENSG00000224532 | 5.13E-15 | -2.63127 | 1 | 1 RP3-470L22.1   | -      |
| ENSG00000224535 | 5.13E-15 | -2.63127 | 1 | 1 RP11-61J19.2   | -      |
| ENSG00000224537 | 5.13E-15 | -2.63127 | 1 | 1 MEP1AP4        | K01395 |
| ENSG00000224539 | 5.13E-15 | -2.63127 | 1 | 1 RP11-432N13.3  | -      |
| ENSG00000224540 | 5.13E-15 | -2.63127 | 1 | 1 RP11-385M4.3   | K04683 |
| ENSG00000224545 | 5.13E-15 | -2.63127 | 1 | 1 AC008264.4     | K02910 |
| ENSG00000224547 | 5.13E-15 | -2.63127 | 1 | 1 AC023669.2     | K09228 |
| ENSG00000224548 | 5.13E-15 | -2.63127 | 1 | 1 RP1-107N3.2    | -      |
| ENSG00000224551 | 5.13E-15 | -2.63127 | 1 | 1 HMGB3P21       | -      |
| ENSG00000224553 | 5.13E-15 | -2.63127 | 1 | 1 AC008065.1     | K02976 |
| ENSG00000224555 | 5.13E-15 | -2.63127 | 1 | 1 RP11-438N5.2   | K11299 |
| ENSG00000224556 | 5.13E-15 | -2.63127 | 1 | 1 RP11-485B17.3  | -      |
| ENSG00000224557 | 5.13E-15 | -2.63127 | 1 | 1 HLA-DPB2       | K06752 |
| ENSG00000224560 | 5.13E-15 | -2.63127 | 1 | 1 RP11-270L13.1  | -      |
| ENSG00000224565 | 5.13E-15 | -2.63127 | 1 | 1 RP1-148H17.1   | -      |
| ENSG00000224566 | 5.13E-15 | -2.63127 | 1 | 1 FAM96AP2       | -      |
| ENSG00000224567 | 5.13E-15 | -2.63127 | 1 | 1 AC129778.5     | K12019 |
| ENSG00000224568 | 5.13E-15 | -2.63127 | 1 | 1 AC096669.3     | -      |
| ENSG00000224570 | 5.13E-15 | -2.63127 | 1 | 1 RP11-430H12.2  | K00710 |
| ENSG00000224571 | 5.13E-15 | -2.63127 | 1 | 1 USP9YP13       | K11840 |
| ENSG00000224573 | 5.13E-15 | -2.63127 | 1 | 1 AC083863.5     | K02936 |
| ENSG00000224574 | 5.13E-15 | -2.63127 | 1 | 1 COL18A1-AS2    | -      |
| ENSG00000224577 | 5.13E-15 | -2.63127 | 1 | 1 LINC01117      | -      |
| ENSG00000224579 | 5.13E-15 | -2.63127 | 1 | 1 AC012314.19    | -      |
| ENSG00000224581 | 5.13E-15 | -2.63127 | 1 | 1 XX-FW84067D5.2 | -      |
| ENSG00000224582 | 5.13E-15 | -2.63127 | 1 | 1 LINC01015      | -      |
| ENSG00000224583 | 5.13E-15 | -2.63127 | 1 | 1 RP11-554D15.4  | -      |
| ENSG00000224584 | 5.13E-15 | -2.63127 | 1 | 1 RP11-365D23.2  | K10704 |
| ENSG00000224585 | 5.13E-15 | -2.63127 | 1 | 1 AC103563.5     | K06856 |
| ENSG00000224586 | 5.13E-15 | -2.63127 | 1 | 1 GPX5           | K00432 |
| ENSG00000224589 | 5.13E-15 | -2.63127 | 1 | 1 RP11-12D5.6    | -      |
| ENSG00000224590 | 5.13E-15 | -2.63127 | 1 | 1 AC007163.10    | -      |
| ENSG00000224592 | 5.13E-15 | -2.63127 | 1 | 1 RP5-884C9.2    | -      |
| ENSG00000224593 | 5.13E-15 | -2.63127 | 1 | 1 RP11-30B1.1    | K02889 |
| ENSG00000224594 | 5.13E-15 | -2.63127 | 1 | 1 RPL29P19       | K02905 |
| ENSG00000224598 | 5.13E-15 | -2.63127 | 1 | 1 RPS5P2         | K02989 |
| ENSG00000224599 | 5.13E-15 | -2.63127 | 1 | 1 BMS1P12        | K14569 |
| ENSG00000224600 | 5.13E-15 | -2.63127 | 1 | 1 RP4-612B18.1   | K02942 |

|                 |          |          |   |                   |        |
|-----------------|----------|----------|---|-------------------|--------|
| ENSG00000224602 | 5.13E-15 | -2.63127 | 1 | 1 RPS26P5         | -      |
| ENSG00000224603 | 5.13E-15 | -2.63127 | 1 | 1 RP11-96J15.1    | -      |
| ENSG00000224604 | 5.13E-15 | -2.63127 | 1 | 1 AC008069.2      | K07375 |
| ENSG00000224605 | 5.13E-15 | -2.63127 | 1 | 1 RP1-177I10.1    | -      |
| ENSG00000224606 | 5.13E-15 | -2.63127 | 1 | 1 TGFA-IT1        | -      |
| ENSG00000224607 | 5.13E-15 | -2.63127 | 1 | 1 IGKV1D-27       | -      |
| ENSG00000224609 | 5.13E-15 | -2.63127 | 1 | 1 RP11-470E16.1   | -      |
| ENSG00000224610 | 5.13E-15 | -2.63127 | 1 | 1 RP11-265P11.1   | -      |
| ENSG00000224611 | 5.13E-15 | -2.63127 | 1 | 1 AC007919.18     | K03120 |
| ENSG00000224612 | 5.13E-15 | -2.63127 | 1 | 1 AC011901.2      | -      |
| ENSG00000224613 | 5.13E-15 | -2.63127 | 1 | 1 RP11-153F1.1    | -      |
| ENSG00000224615 | 5.13E-15 | -2.63127 | 1 | 1 RP11-34H11.1    | -      |
| ENSG00000224617 | 5.13E-15 | -2.63127 | 1 | 1 RP11-402P6.5    | -      |
| ENSG00000224618 | 5.13E-15 | -2.63127 | 1 | 1 AC096921.2      | -      |
| ENSG00000224620 | 5.13E-15 | -2.63127 | 1 | 1 MEF2AP1         | K09260 |
| ENSG00000224622 | 5.13E-15 | -2.63127 | 1 | 1 OR9R1P          | K04257 |
| ENSG00000224623 | 5.13E-15 | -2.63127 | 1 | 1 RP11-247I13.8   | -      |
| ENSG00000224625 | 5.13E-15 | -2.63127 | 1 | 1 TUBB8P6         | K07375 |
| ENSG00000224626 | 5.13E-15 | -2.63127 | 1 | 1 AC106053.1      | -      |
| ENSG00000224627 | 5.13E-15 | -2.63127 | 1 | 1 RPL37P10        | K02922 |
| ENSG00000224628 | 5.13E-15 | -2.63127 | 1 | 1 RP5-854E16.2    | -      |
| ENSG00000224630 | 5.13E-15 | -2.63127 | 1 | 1 RP1-169P22.2    | -      |
| ENSG00000224632 | 5.13E-15 | -2.63127 | 1 | 1 LLOXNC01-73E8.1 | K13355 |
| ENSG00000224634 | 5.13E-15 | -2.63127 | 1 | 1 ZNF736P6Y       | K09228 |
| ENSG00000224637 | 5.13E-15 | -2.63127 | 1 | 1 AC019129.2      | K12504 |
| ENSG00000224638 | 5.13E-15 | -2.63127 | 1 | 1 AC106900.6      | -      |
| ENSG00000224640 | 5.13E-15 | -2.63127 | 1 | 1 SRSF1P1         | K12890 |
| ENSG00000224643 | 5.13E-15 | -2.63127 | 1 | 1 AC064871.3      | -      |
| ENSG00000224645 | 5.13E-15 | -2.63127 | 1 | 1 RP11-126K1.8    | -      |
| ENSG00000224649 | 5.13E-15 | -2.63127 | 1 | 1 AF124730.4      | -      |
| ENSG00000224650 | 5.13E-15 | -2.63127 | 1 | 1 IGHV3-74        | K06856 |
| ENSG00000224653 | 5.13E-15 | -2.63127 | 1 | 1 RP11-548K12.10  | -      |
| ENSG00000224655 | 5.13E-15 | -2.63127 | 1 | 1 AC018737.3      | -      |
| ENSG00000224656 | 5.13E-15 | -2.63127 | 1 | 1 RP1-212G6.4     | K00802 |
| ENSG00000224657 | 5.13E-15 | -2.63127 | 1 | 1 RBMY2BP         | K12885 |
| ENSG00000224658 | 5.13E-15 | -2.63127 | 1 | 1 RP11-631F7.1    | -      |
| ENSG00000224659 | 5.13E-15 | -2.63127 | 1 | 1 GAGE12J         | -      |
| ENSG00000224661 | 5.13E-15 | -2.63127 | 1 | 1 AC010907.5      | -      |
| ENSG00000224662 | 5.13E-15 | -2.63127 | 1 | 1 ATP6V1G1P3      | K02152 |
| ENSG00000224664 | 5.13E-15 | -2.63127 | 1 | 1 RPL36AP53       | K02929 |
| ENSG00000224666 | 5.13E-15 | -2.63127 | 1 | 1 RP1-50J22.4     | -      |
| ENSG00000224667 | 5.13E-15 | -2.63127 | 1 | 1 AC013470.8      | -      |
| ENSG00000224668 | 5.13E-15 | -2.63127 | 1 | 1 IPO8P1          | -      |
| ENSG00000224669 | 5.13E-15 | -2.63127 | 1 | 1 RP11-561N12.1   | K02437 |
| ENSG00000224670 | 5.13E-15 | -2.63127 | 1 | 1 AC068135.1      | -      |
| ENSG00000224671 | 5.13E-15 | -2.63127 | 1 | 1 RP11-335O13.8   | -      |
| ENSG00000224672 | 5.13E-15 | -2.63127 | 1 | 1 AC007272.3      | K02880 |
| ENSG00000224674 | 5.13E-15 | -2.63127 | 1 | 1 EIF3EP2         | K17985 |
| ENSG00000224675 | 5.13E-15 | -2.63127 | 1 | 1 AC009227.2      | -      |
| ENSG00000224678 | 5.13E-15 | -2.63127 | 1 | 1 GAPDHP46        | K00134 |
| ENSG00000224679 | 5.13E-15 | -2.63127 | 1 | 1 MED15P4         | K15157 |
| ENSG00000224681 | 5.13E-15 | -2.63127 | 1 | 1 RP11-146D12.5   | K09228 |
| ENSG00000224683 | 5.13E-15 | -2.63127 | 1 | 1 RPL36AP29       | K02929 |
| ENSG00000224685 | 5.13E-15 | -2.63127 | 1 | 1 RP11-84O12.3    | K02929 |
| ENSG00000224686 | 5.13E-15 | -2.63127 | 1 | 1 TCEB1P23        | -      |
| ENSG00000224689 | 5.13E-15 | -2.63127 | 1 | 1 ZNF812          | K09228 |
| ENSG00000224690 | 5.13E-15 | -2.63127 | 1 | 1 UBE2D3P3        | K06689 |
| ENSG00000224691 | 5.13E-15 | -2.63127 | 1 | 1 GS1-174L6.4     | -      |

|                 |          |          |   |   |                   |        |
|-----------------|----------|----------|---|---|-------------------|--------|
| ENSG00000224692 | 5.13E-15 | -2.63127 | 1 | 1 | LL0XNC01-177E8.2_ |        |
| ENSG00000224695 | 5.13E-15 | -2.63127 | 1 | 1 | MTND6P7           | -      |
| ENSG00000224697 | 5.13E-15 | -2.63127 | 1 | 1 | NEFMP1            | K04573 |
| ENSG00000224698 | 5.13E-15 | -2.63127 | 1 | 1 | RP11-131J3.1      | -      |
| ENSG00000224700 | 5.13E-15 | -2.63127 | 1 | 1 | RP11-697E14.2     | -      |
| ENSG00000224701 | 5.13E-15 | -2.63127 | 1 | 1 | MED28P4           | K15141 |
| ENSG00000224702 | 5.13E-15 | -2.63127 | 1 | 1 | RP11-38C18.2      | -      |
| ENSG00000224706 | 5.13E-15 | -2.63127 | 1 | 1 | RPS17P13          | K02962 |
| ENSG00000224709 | 5.13E-15 | -2.63127 | 1 | 1 | OR11M1P           | K04257 |
| ENSG00000224710 | 5.13E-15 | -2.63127 | 1 | 1 | FAM90A8P          | -      |
| ENSG00000224711 | 5.13E-15 | -2.63127 | 1 | 1 | RP5-988G17.1      | -      |
| ENSG00000224713 | 5.13E-15 | -2.63127 | 1 | 1 | AC025165.8        | -      |
| ENSG00000224714 | 5.13E-15 | -2.63127 | 1 | 1 | RP11-179K3.2      | -      |
| ENSG00000224717 | 5.13E-15 | -2.63127 | 1 | 1 | RP11-576D8.4      | -      |
| ENSG00000224718 | 5.13E-15 | -2.63127 | 1 | 1 | RP11-222A5.1      | -      |
| ENSG00000224719 | 5.13E-15 | -2.63127 | 1 | 1 | AC009237.6        | K14592 |
| ENSG00000224723 | 5.13E-15 | -2.63127 | 1 | 1 | GUSBP10           | K01195 |
| ENSG00000224727 | 5.13E-15 | -2.63127 | 1 | 1 | FCF1P7            | K14566 |
| ENSG00000224730 | 5.13E-15 | -2.63127 | 1 | 1 | AC009892.10       | -      |
| ENSG00000224731 | 5.13E-15 | -2.63127 | 1 | 1 | AC016716.2        | -      |
| ENSG00000224732 | 5.13E-15 | -2.63127 | 1 | 1 | MAGEA7P           | -      |
| ENSG00000224735 | 5.13E-15 | -2.63127 | 1 | 1 | RP11-272G22.1     | K19028 |
| ENSG00000224743 | 5.13E-15 | -2.63127 | 1 | 1 | TEX26-AS1         | -      |
| ENSG00000224747 | 5.13E-15 | -2.63127 | 1 | 1 | AP001065.7        | -      |
| ENSG00000224751 | 5.13E-15 | -2.63127 | 1 | 1 | SHMT1P1           | K00600 |
| ENSG00000224752 | 5.13E-15 | -2.63127 | 1 | 1 | VN1R21P           | K04614 |
| ENSG00000224755 | 5.13E-15 | -2.63127 | 1 | 1 | HMGN1P34          | -      |
| ENSG00000224758 | 5.13E-15 | -2.63127 | 1 | 1 | LINC01167         | -      |
| ENSG00000224760 | 5.13E-15 | -2.63127 | 1 | 1 | C1DP3             | K12592 |
| ENSG00000224761 | 5.13E-15 | -2.63127 | 1 | 1 | RP11-508N22.8     | -      |
| ENSG00000224762 | 5.13E-15 | -2.63127 | 1 | 1 | CR769776.3        | K09228 |
| ENSG00000224764 | 5.13E-15 | -2.63127 | 1 | 1 | RP11-54O15.3      | -      |
| ENSG00000224765 | 5.13E-15 | -2.63127 | 1 | 1 | RP1-137H15.2      | -      |
| ENSG00000224769 | 5.13E-15 | -2.63127 | 1 | 1 | AC069213.1        | -      |
| ENSG00000224771 | 5.13E-15 | -2.63127 | 1 | 1 | ATP2B2-IT2        | -      |
| ENSG00000224773 | 5.13E-15 | -2.63127 | 1 | 1 | HSPA8P7           | K03283 |
| ENSG00000224775 | 5.13E-15 | -2.63127 | 1 | 1 | BRAFP1            | K04365 |
| ENSG00000224776 | 5.13E-15 | -2.63127 | 1 | 1 | RP11-361A21.1     | K02998 |
| ENSG00000224778 | 5.13E-15 | -2.63127 | 1 | 1 | CENPIP1           | K11501 |
| ENSG00000224781 | 5.13E-15 | -2.63127 | 1 | 1 | EIF4A2P4          | K03257 |
| ENSG00000224783 | 5.13E-15 | -2.63127 | 1 | 1 | MIPEPP2           | K01410 |
| ENSG00000224784 | 5.13E-15 | -2.63127 | 1 | 1 | AL591704.7        | -      |
| ENSG00000224785 | 5.13E-15 | -2.63127 | 1 | 1 | AC006026.9        | K06174 |
| ENSG00000224788 | 5.13E-15 | -2.63127 | 1 | 1 | RP5-933E2.1       | -      |
| ENSG00000224789 | 5.13E-15 | -2.63127 | 1 | 1 | AC012363.4        | -      |
| ENSG00000224791 | 5.13E-15 | -2.63127 | 1 | 1 | KRT18P39          | K07604 |
| ENSG00000224792 | 5.13E-15 | -2.63127 | 1 | 1 | RP11-314A5.3      | -      |
| ENSG00000224795 | 5.13E-15 | -2.63127 | 1 | 1 | AP003039.3        | -      |
| ENSG00000224796 | 5.13E-15 | -2.63127 | 1 | 1 | RPL32P1           | K02912 |
| ENSG00000224797 | 5.13E-15 | -2.63127 | 1 | 1 | RP11-57C19.6      | K02922 |
| ENSG00000224802 | 5.13E-15 | -2.63127 | 1 | 1 | TUBB4BP2          | K07375 |
| ENSG00000224804 | 5.13E-15 | -2.63127 | 1 | 1 | AC004878.2        | -      |
| ENSG00000224806 | 5.13E-15 | -2.63127 | 1 | 1 | ARL5AP4           | K07949 |
| ENSG00000224807 | 5.13E-15 | -2.63127 | 1 | 1 | DUX4L9            | -      |
| ENSG00000224808 | 5.13E-15 | -2.63127 | 1 | 1 | SRGAP3-AS1        | -      |
| ENSG00000224809 | 5.13E-15 | -2.63127 | 1 | 1 | BEND3P2           | -      |
| ENSG00000224810 | 5.13E-15 | -2.63127 | 1 | 1 | RP11-538D16.2     | -      |
| ENSG00000224812 | 5.13E-15 | -2.63127 | 1 | 1 | TMEM72-AS1        | -      |

|                 |          |          |   |                  |        |
|-----------------|----------|----------|---|------------------|--------|
| ENSG00000224813 | 5.13E-15 | -2.63127 | 1 | 1 RP4-669L17.4   | K16941 |
| ENSG00000224814 | 5.13E-15 | -2.63127 | 1 | 1 AC114812.8     | -      |
| ENSG00000224815 | 5.13E-15 | -2.63127 | 1 | 1 RP11-307E17.9  | K18751 |
| ENSG00000224816 | 5.13E-15 | -2.63127 | 1 | 1 NAP1L4P2       | -      |
| ENSG00000224819 | 5.13E-15 | -2.63127 | 1 | 1 AC093843.1     | -      |
| ENSG00000224821 | 5.13E-15 | -2.63127 | 1 | 1 COL4A2-AS2     | -      |
| ENSG00000224822 | 5.13E-15 | -2.63127 | 1 | 1 THRB-IT1       | -      |
| ENSG00000224825 | 5.13E-15 | -2.63127 | 1 | 1 RP11-171A24.3  | -      |
| ENSG00000224826 | 5.13E-15 | -2.63127 | 1 | 1 AC019109.1     | K11833 |
| ENSG00000224827 | 5.13E-15 | -2.63127 | 1 | 1 LINC00265-2P   | -      |
| ENSG00000224828 | 5.13E-15 | -2.63127 | 1 | 1 RP11-186G6.5   | K07915 |
| ENSG00000224829 | 5.13E-15 | -2.63127 | 1 | 1 CTD-2589O24.1  | K17770 |
| ENSG00000224830 | 5.13E-15 | -2.63127 | 1 | 1 OR2X1P         | -      |
| ENSG00000224832 | 5.13E-15 | -2.63127 | 1 | 1 AP000469.2     | -      |
| ENSG00000224834 | 5.13E-15 | -2.63127 | 1 | 1 BTF3P9         | K01527 |
| ENSG00000224836 | 5.13E-15 | -2.63127 | 1 | 1 RP11-341G2.3   | -      |
| ENSG00000224842 | 5.13E-15 | -2.63127 | 1 | 1 RP11-123K19.1  | -      |
| ENSG00000224844 | 5.13E-15 | -2.63127 | 1 | 1 AC107079.1     | -      |
| ENSG00000224848 | 5.13E-15 | -2.63127 | 1 | 1 RP11-535M15.1  | -      |
| ENSG00000224849 | 5.13E-15 | -2.63127 | 1 | 1 RP1-104O17.1   | -      |
| ENSG00000224850 | 5.13E-15 | -2.63127 | 1 | 1 AC108051.3     | -      |
| ENSG00000224851 | 5.13E-15 | -2.63127 | 1 | 1 LINC00502      | -      |
| ENSG00000224852 | 5.13E-15 | -2.63127 | 1 | 1 MTND5P24       | -      |
| ENSG00000224856 | 5.13E-15 | -2.63127 | 1 | 1 RP4-796I17.5   | K02917 |
| ENSG00000224857 | 5.13E-15 | -2.63127 | 1 | 1 RP11-344P13.1  | -      |
| ENSG00000224860 | 5.13E-15 | -2.63127 | 1 | 1 GXYLT1P2       | K13676 |
| ENSG00000224863 | 5.13E-15 | -2.63127 | 1 | 1 RP5-1109J22.2  | -      |
| ENSG00000224864 | 5.13E-15 | -2.63127 | 1 | 1 CTC-260E6.2    | K02960 |
| ENSG00000224865 | 5.13E-15 | -2.63127 | 1 | 1 AC009518.4     | -      |
| ENSG00000224866 | 5.13E-15 | -2.63127 | 1 | 1 USP9YP25       | -      |
| ENSG00000224867 | 5.13E-15 | -2.63127 | 1 | 1 AC096644.1     | -      |
| ENSG00000224869 | 5.13E-15 | -2.63127 | 1 | 1 AC062016.1     | -      |
| ENSG00000224871 | 5.13E-15 | -2.63127 | 1 | 1 XX-FW81066F1.2 | -      |
| ENSG00000224873 | 5.13E-15 | -2.63127 | 1 | 1 CDY13P         | -      |
| ENSG00000224875 | 5.13E-15 | -2.63127 | 1 | 1 AC083949.1     | -      |
| ENSG00000224876 | 5.13E-15 | -2.63127 | 1 | 1 RP11-49G10.3   | -      |
| ENSG00000224879 | 5.13E-15 | -2.63127 | 1 | 1 AC011754.1     | -      |
| ENSG00000224880 | 5.13E-15 | -2.63127 | 1 | 1 RP11-1217F2.7  | -      |
| ENSG00000224881 | 5.13E-15 | -2.63127 | 1 | 1 AC068279.3     | -      |
| ENSG00000224883 | 5.13E-15 | -2.63127 | 1 | 1 CTA-250D10.19  | -      |
| ENSG00000224884 | 5.13E-15 | -2.63127 | 1 | 1 AC034187.2     | -      |
| ENSG00000224887 | 5.13E-15 | -2.63127 | 1 | 1 RP11-276H19.4  | K08066 |
| ENSG00000224891 | 5.13E-15 | -2.63127 | 1 | 1 AC007899.3     | -      |
| ENSG00000224893 | 5.13E-15 | -2.63127 | 1 | 1 RP1-200K18.1   | -      |
| ENSG00000224895 | 5.13E-15 | -2.63127 | 1 | 1 VPS26BP1       | K18466 |
| ENSG00000224896 | 5.13E-15 | -2.63127 | 1 | 1 SIGLEC30P      | K06749 |
| ENSG00000224901 | 5.13E-15 | -2.63127 | 1 | 1 RP11-448G4.4   | -      |
| ENSG00000224902 | 5.13E-15 | -2.63127 | 1 | 1 GAGE12H        | -      |
| ENSG00000224904 | 5.13E-15 | -2.63127 | 1 | 1 RP5-934G17.6   | K18061 |
| ENSG00000224906 | 5.13E-15 | -2.63127 | 1 | 1 RP1-102E24.9   | K03104 |
| ENSG00000224907 | 5.13E-15 | -2.63127 | 1 | 1 RP11-451M19.2  | K02889 |
| ENSG00000224908 | 5.13E-15 | -2.63127 | 1 | 1 TIMM8BP2       | K17780 |
| ENSG00000224911 | 5.13E-15 | -2.63127 | 1 | 1 AC015936.3     | -      |
| ENSG00000224916 | 5.13E-15 | -2.63127 | 1 | 1 APOC4-APOC2    | K09228 |
| ENSG00000224917 | 5.13E-15 | -2.63127 | 1 | 1 AC016694.2     | -      |
| ENSG00000224918 | 5.13E-15 | -2.63127 | 1 | 1 AY269186.2     | -      |
| ENSG00000224919 | 5.13E-15 | -2.63127 | 1 | 1 RP11-144G6.4   | -      |
| ENSG00000224920 | 5.13E-15 | -2.63127 | 1 | 1 TACC1P1        | K14281 |



|                 |          |          |   |                    |        |
|-----------------|----------|----------|---|--------------------|--------|
| ENSG00000224922 | 5.13E-15 | -2.63127 | 1 | 1 AL050303.7       | -      |
| ENSG00000224924 | 5.13E-15 | -2.63127 | 1 | 1 LINC00320        | -      |
| ENSG00000224927 | 5.13E-15 | -2.63127 | 1 | 1 NDUFA5P10        | K03949 |
| ENSG00000224931 | 5.13E-15 | -2.63127 | 1 | 1 AC152010.1       | -      |
| ENSG00000224932 | 5.13E-15 | -2.63127 | 1 | 1 AC107399.2       | -      |
| ENSG00000224933 | 5.13E-15 | -2.63127 | 1 | 1 LINC01034        | -      |
| ENSG00000224935 | 5.13E-15 | -2.63127 | 1 | 1 RP11-74C3.1      | -      |
| ENSG00000224936 | 5.13E-15 | -2.63127 | 1 | 1 SUCLA2P1         | K01900 |
| ENSG00000224937 | 5.13E-15 | -2.63127 | 1 | 1 RP11-34H11.6     | -      |
| ENSG00000224939 | 5.13E-15 | -2.63127 | 1 | 1 LINC00184        | -      |
| ENSG00000224942 | 5.13E-15 | -2.63127 | 1 | 1 RP11-51C14.1     | K11462 |
| ENSG00000224943 | 5.13E-15 | -2.63127 | 1 | 1 RP11-180D21.3    | -      |
| ENSG00000224944 | 5.13E-15 | -2.63127 | 1 | 1 CASC6            | -      |
| ENSG00000224946 | 5.13E-15 | -2.63127 | 1 | 1 AC007312.3       | K11366 |
| ENSG00000224947 | 5.13E-15 | -2.63127 | 1 | 1 VN1R25P          | K04614 |
| ENSG00000224948 | 5.13E-15 | -2.63127 | 1 | 1 ATP5G1P8         | K02128 |
| ENSG00000224949 | 5.13E-15 | -2.63127 | 1 | 1 RP11-161N3.3     | K02922 |
| ENSG00000224953 | 5.13E-15 | -2.63127 | 1 | 1 SRIP3            | -      |
| ENSG00000224955 | 5.13E-15 | -2.63127 | 1 | 1 RP11-32I2.1      | -      |
| ENSG00000224957 | 5.13E-15 | -2.63127 | 1 | 1 AC090044.1       | -      |
| ENSG00000224958 | 5.13E-15 | -2.63127 | 1 | 1 PGM5-AS1         | -      |
| ENSG00000224961 | 5.13E-15 | -2.63127 | 1 | 1 RP1-278O22.1     | -      |
| ENSG00000224962 | 5.13E-15 | -2.63127 | 1 | 1 PSAT1P4          | K00831 |
| ENSG00000224963 | 5.13E-15 | -2.63127 | 1 | 1 U82695.9         | -      |
| ENSG00000224964 | 5.13E-15 | -2.63127 | 1 | 1 TRAPPC2P3        | -      |
| ENSG00000224966 | 5.13E-15 | -2.63127 | 1 | 1 TBC1D3P6         | K11837 |
| ENSG00000224967 | 5.13E-15 | -2.63127 | 1 | 1 AC009303.3       | K05638 |
| ENSG00000224968 | 5.13E-15 | -2.63127 | 1 | 1 RP1-35C21.1      | -      |
| ENSG00000224970 | 5.13E-15 | -2.63127 | 1 | 1 RP11-114L10.2    | -      |
| ENSG00000224972 | 5.13E-15 | -2.63127 | 1 | 1 RP11-403H13.1    | -      |
| ENSG00000224973 | 5.13E-15 | -2.63127 | 1 | 1 LARGE-AS1        | -      |
| ENSG00000224975 | 5.13E-15 | -2.63127 | 1 | 1 INE1             | -      |
| ENSG00000224976 | 5.13E-15 | -2.63127 | 1 | 1 PARP4P2          | K10798 |
| ENSG00000224977 | 5.13E-15 | -2.63127 | 1 | 1 RP11-160H22.3    | -      |
| ENSG00000224978 | 5.13E-15 | -2.63127 | 1 | 1 RP13-228J13.9    | -      |
| ENSG00000224980 | 5.13E-15 | -2.63127 | 1 | 1 RP11-377K22.3    | K02893 |
| ENSG00000224981 | 5.13E-15 | -2.63127 | 1 | 1 AC000367.1       | K17045 |
| ENSG00000224982 | 5.13E-15 | -2.63127 | 1 | 1 TMEM233          | -      |
| ENSG00000224986 | 5.13E-15 | -2.63127 | 1 | 1 PPP1R8P1         | K13216 |
| ENSG00000224987 | 5.13E-15 | -2.63127 | 1 | 1 RP1-191J18.65    | K02875 |
| ENSG00000224988 | 5.13E-15 | -2.63127 | 1 | 1 RP11-409K20.7    | -      |
| ENSG00000224989 | 5.13E-15 | -2.63127 | 1 | 1 FAM41AY1         | -      |
| ENSG00000224992 | 5.13E-15 | -2.63127 | 1 | 1 RP11-295G24.5    | -      |
| ENSG00000224995 | 5.13E-15 | -2.63127 | 1 | 1 RP5-991C6.3      | -      |
| ENSG00000224999 | 5.13E-15 | -2.63127 | 1 | 1 XXyac-YX65C7_A.4 | -      |
| ENSG00000225000 | 5.13E-15 | -2.63127 | 1 | 1 AC010082.2       | -      |
| ENSG00000225003 | 5.13E-15 | -2.63127 | 1 | 1 OR51A5P          | K04257 |
| ENSG00000225005 | 5.13E-15 | -2.63127 | 1 | 1 RP11-483G21.3    | K02936 |
| ENSG00000225006 | 5.13E-15 | -2.63127 | 1 | 1 RP11-669M2.1     | -      |
| ENSG00000225007 | 5.13E-15 | -2.63127 | 1 | 1 AC000067.1       | -      |
| ENSG00000225008 | 5.13E-15 | -2.63127 | 1 | 1 RP13-228J13.6    | K08870 |
| ENSG00000225011 | 5.13E-15 | -2.63127 | 1 | 1 RP11-810H18.1    | K16662 |
| ENSG00000225012 | 5.13E-15 | -2.63127 | 1 | 1 RP13-348B13.2    | -      |
| ENSG00000225014 | 5.13E-15 | -2.63127 | 1 | 1 KCTD9P1          | -      |
| ENSG00000225015 | 5.13E-15 | -2.63127 | 1 | 1 SNX18P15         | K17299 |
| ENSG00000225016 | 5.13E-15 | -2.63127 | 1 | 1 LINC00328-2P     | -      |
| ENSG00000225017 | 5.13E-15 | -2.63127 | 1 | 1 AP004289.1       | K01681 |
| ENSG00000225018 | 5.13E-15 | -2.63127 | 1 | 1 RP11-419M24.5    | K04393 |

|                 |          |          |   |                    |        |
|-----------------|----------|----------|---|--------------------|--------|
| ENSG00000225024 | 5.13E-15 | -2.63127 | 1 | 1 AC015977.5       | K02922 |
| ENSG00000225025 | 5.13E-15 | -2.63127 | 1 | 1 KIF4CP           | K10395 |
| ENSG00000225026 | 5.13E-15 | -2.63127 | 1 | 1 AC091492.2       | K09548 |
| ENSG00000225027 | 5.13E-15 | -2.63127 | 1 | 1 IFNWP4           | K05414 |
| ENSG00000225036 | 5.13E-15 | -2.63127 | 1 | 1 RP11-414B7.1     | K02089 |
| ENSG00000225044 | 5.13E-15 | -2.63127 | 1 | 1 RP11-204C23.1    | -      |
| ENSG00000225045 | 5.13E-15 | -2.63127 | 1 | 1 MTND5P27         | K03883 |
| ENSG00000225046 | 5.13E-15 | -2.63127 | 1 | 1 RP1-20I3.3       | -      |
| ENSG00000225049 | 5.13E-15 | -2.63127 | 1 | 1 AC068279.2       | -      |
| ENSG00000225050 | 5.13E-15 | -2.63127 | 1 | 1 RP11-349E4.1     | -      |
| ENSG00000225055 | 5.13E-15 | -2.63127 | 1 | 1 RP11-344N17.9    | K00819 |
| ENSG00000225056 | 5.13E-15 | -2.63127 | 1 | 1 RP11-218C14.5    | -      |
| ENSG00000225057 | 5.13E-15 | -2.63127 | 1 | 1 AC096574.4       | -      |
| ENSG00000225058 | 5.13E-15 | -2.63127 | 1 | 1 RP11-132N15.1    | -      |
| ENSG00000225063 | 5.13E-15 | -2.63127 | 1 | 1 RP11-383G10.5    | -      |
| ENSG00000225064 | 5.13E-15 | -2.63127 | 1 | 1 AC007879.6       | -      |
| ENSG00000225066 | 5.13E-15 | -2.63127 | 1 | 1 RP1-272E8.1      | K10127 |
| ENSG00000225069 | 5.13E-15 | -2.63127 | 1 | 1 RP5-1025A1.2     | K06747 |
| ENSG00000225070 | 5.13E-15 | -2.63127 | 1 | 1 LL22NC03-23C6.13 | -      |
| ENSG00000225072 | 5.13E-15 | -2.63127 | 1 | 1 OR7E116P         | K04257 |
| ENSG00000225076 | 5.13E-15 | -2.63127 | 1 | 1 WWC3-AS1         | -      |
| ENSG00000225079 | 5.13E-15 | -2.63127 | 1 | 1 FTH1P22          | -      |
| ENSG00000225080 | 5.13E-15 | -2.63127 | 1 | 1 PFN1P4           | K05759 |
| ENSG00000225082 | 5.13E-15 | -2.63127 | 1 | 1 DAP3P1           | K17408 |
| ENSG00000225084 | 5.13E-15 | -2.63127 | 1 | 1 AL450226.2       | -      |
| ENSG00000225085 | 5.13E-15 | -2.63127 | 1 | 1 RP11-15B24.1     | -      |
| ENSG00000225087 | 5.13E-15 | -2.63127 | 1 | 1 RP4-660H19.1     | -      |
| ENSG00000225094 | 5.13E-15 | -2.63127 | 1 | 1 SETP20           | K11290 |
| ENSG00000225100 | 5.13E-15 | -2.63127 | 1 | 1 RP11-479O17.7    | -      |
| ENSG00000225101 | 5.13E-15 | -2.63127 | 1 | 1 OR52K3P          | K04257 |
| ENSG00000225102 | 5.13E-15 | -2.63127 | 1 | 1 RP11-456H18.1    | -      |
| ENSG00000225105 | 5.13E-15 | -2.63127 | 1 | 1 LINC01076        | -      |
| ENSG00000225106 | 5.13E-15 | -2.63127 | 1 | 1 RP11-429E11.2    | -      |
| ENSG00000225107 | 5.13E-15 | -2.63127 | 1 | 1 AC092484.1       | -      |
| ENSG00000225110 | 5.13E-15 | -2.63127 | 1 | 1 LL0XNC01-16G2.1  | -      |
| ENSG00000225112 | 5.13E-15 | -2.63127 | 1 | 1 RP11-295P9.6     | -      |
| ENSG00000225116 | 5.13E-15 | -2.63127 | 1 | 1 RP11-137F15.1    | -      |
| ENSG00000225117 | 5.13E-15 | -2.63127 | 1 | 1 ARSDP1           | K12374 |
| ENSG00000225118 | 5.13E-15 | -2.63127 | 1 | 1 RP11-477L16.2    | -      |
| ENSG00000225121 | 5.13E-15 | -2.63127 | 1 | 1 EEF1B2P5         | K03232 |
| ENSG00000225122 | 5.13E-15 | -2.63127 | 1 | 1 RP11-408E1.1     | K03245 |
| ENSG00000225124 | 5.13E-15 | -2.63127 | 1 | 1 AC023271.2       | -      |
| ENSG00000225126 | 5.13E-15 | -2.63127 | 1 | 1 RP4-549F15.1     | -      |
| ENSG00000225127 | 5.13E-15 | -2.63127 | 1 | 1 LINC00237        | -      |
| ENSG00000225128 | 5.13E-15 | -2.63127 | 1 | 1 LINC00972        | -      |
| ENSG00000225129 | 5.13E-15 | -2.63127 | 1 | 1 RP4-614C15.2     | -      |
| ENSG00000225136 | 5.13E-15 | -2.63127 | 1 | 1 PGBD4P5          | -      |
| ENSG00000225140 | 5.13E-15 | -2.63127 | 1 | 1 RP11-809C18.3    | -      |
| ENSG00000225142 | 5.13E-15 | -2.63127 | 1 | 1 RP11-490K7.1     | K02889 |
| ENSG00000225144 | 5.13E-15 | -2.63127 | 1 | 1 AC018643.4       | -      |
| ENSG00000225147 | 5.13E-15 | -2.63127 | 1 | 1 RPS12P10         | -      |
| ENSG00000225148 | 5.13E-15 | -2.63127 | 1 | 1 RP5-899B16.2     | -      |
| ENSG00000225152 | 5.13E-15 | -2.63127 | 1 | 1 RP11-338O1.2     | -      |
| ENSG00000225154 | 5.13E-15 | -2.63127 | 1 | 1 RP11-184J23.2    | K07374 |
| ENSG00000225155 | 5.13E-15 | -2.63127 | 1 | 1 TOMM2P5          | K17769 |
| ENSG00000225156 | 5.13E-15 | -2.63127 | 1 | 1 AC012354.6       | -      |
| ENSG00000225157 | 5.13E-15 | -2.63127 | 1 | 1 AC005779.1       | K13194 |
| ENSG00000225158 | 5.13E-15 | -2.63127 | 1 | 1 HSPE1P24         | K04078 |

|                 |          |          |   |                    |        |
|-----------------|----------|----------|---|--------------------|--------|
| ENSG00000225165 | 5.13E-15 | -2.63127 | 1 | 1 CTD-2538A21.1    | K15433 |
| ENSG00000225167 | 5.13E-15 | -2.63127 | 1 | 1 TXNP2            | K03671 |
| ENSG00000225170 | 5.13E-15 | -2.63127 | 1 | 1 RP5-828K20.1     | -      |
| ENSG00000225172 | 5.13E-15 | -2.63127 | 1 | 1 RP11-16L9.2      | -      |
| ENSG00000225173 | 5.13E-15 | -2.63127 | 1 | 1 XXbac-BPG308K3.5 | -      |
| ENSG00000225174 | 5.13E-15 | -2.63127 | 1 | 1 OSTM1-AS1        | -      |
| ENSG00000225175 | 5.13E-15 | -2.63127 | 1 | 1 RP11-795A2.2     | -      |
| ENSG00000225176 | 5.13E-15 | -2.63127 | 1 | 1 ATP5LP4          | K02140 |
| ENSG00000225178 | 5.13E-15 | -2.63127 | 1 | 1 RPSAP56          | K02998 |
| ENSG00000225179 | 5.13E-15 | -2.63127 | 1 | 1 LINC00457        | -      |
| ENSG00000225180 | 5.13E-15 | -2.63127 | 1 | 1 AATK-AS1         | -      |
| ENSG00000225181 | 5.13E-15 | -2.63127 | 1 | 1 RP11-388K2.1     | -      |
| ENSG00000225182 | 5.13E-15 | -2.63127 | 1 | 1 AC092601.1       | -      |
| ENSG00000225183 | 5.13E-15 | -2.63127 | 1 | 1 RP4-758J24.4     | K02271 |
| ENSG00000225185 | 5.13E-15 | -2.63127 | 1 | 1 RP11-481K9.4     | K03767 |
| ENSG00000225187 | 5.13E-15 | -2.63127 | 1 | 1 AC073283.7       | -      |
| ENSG00000225189 | 5.13E-15 | -2.63127 | 1 | 1 REREP1Y          | K05628 |
| ENSG00000225191 | 5.13E-15 | -2.63127 | 1 | 1 RP11-97C18.1     | K11825 |
| ENSG00000225192 | 5.13E-15 | -2.63127 | 1 | 1 ZNF33BP1         | K09228 |
| ENSG00000225194 | 5.13E-15 | -2.63127 | 1 | 1 LINC00092        | -      |
| ENSG00000225196 | 5.13E-15 | -2.63127 | 1 | 1 RP5-1118D24.2    | K02866 |
| ENSG00000225198 | 5.13E-15 | -2.63127 | 1 | 1 SSXP3            | K15625 |
| ENSG00000225200 | 5.13E-15 | -2.63127 | 1 | 1 AB019441.29      | K02995 |
| ENSG00000225208 | 5.13E-15 | -2.63127 | 1 | 1 RP11-107I14.2    | -      |
| ENSG00000225209 | 5.13E-15 | -2.63127 | 1 | 1 RP11-358M3.1     | -      |
| ENSG00000225212 | 5.13E-15 | -2.63127 | 1 | 1 AKR1B1P6         | K00011 |
| ENSG00000225214 | 5.13E-15 | -2.63127 | 1 | 1 AC079790.2       | -      |
| ENSG00000225215 | 5.13E-15 | -2.63127 | 1 | 1 SMARCE1P1        | K11651 |
| ENSG00000225216 | 5.13E-15 | -2.63127 | 1 | 1 AC007362.3       | -      |
| ENSG00000225217 | 5.13E-15 | -2.63127 | 1 | 1 HSPA7            | K03283 |
| ENSG00000225221 | 5.13E-15 | -2.63127 | 1 | 1 PLA2G12AP2       | -      |
| ENSG00000225222 | 5.13E-15 | -2.63127 | 1 | 1 CHCHD4P5         | K17782 |
| ENSG00000225224 | 5.13E-15 | -2.63127 | 1 | 1 RP4-814D15.2     | K02977 |
| ENSG00000225225 | 5.13E-15 | -2.63127 | 1 | 1 ARL2BPP10        | -      |
| ENSG00000225226 | 5.13E-15 | -2.63127 | 1 | 1 AC007250.4       | -      |
| ENSG00000225231 | 5.13E-15 | -2.63127 | 1 | 1 AC091814.2       | -      |
| ENSG00000225233 | 5.13E-15 | -2.63127 | 1 | 1 RP11-554K11.2    | -      |
| ENSG00000225235 | 5.13E-15 | -2.63127 | 1 | 1 DDX26B-AS1       | -      |
| ENSG00000225236 | 5.13E-15 | -2.63127 | 1 | 1 AP000936.5       | K14397 |
| ENSG00000225238 | 5.13E-15 | -2.63127 | 1 | 1 RP1-169I5.4      | K13135 |
| ENSG00000225239 | 5.13E-15 | -2.63127 | 1 | 1 RPL21P107        | K02889 |
| ENSG00000225240 | 5.13E-15 | -2.63127 | 1 | 1 AC117490.2       | -      |
| ENSG00000225242 | 5.13E-15 | -2.63127 | 1 | 1 COX6B1P7         | -      |
| ENSG00000225243 | 5.13E-15 | -2.63127 | 1 | 1 RP1-127D3.4      | -      |
| ENSG00000225244 | 5.13E-15 | -2.63127 | 1 | 1 RP11-220H4.2     | K03323 |
| ENSG00000225246 | 5.13E-15 | -2.63127 | 1 | 1 RPS2P1           | K02981 |
| ENSG00000225249 | 5.13E-15 | -2.63127 | 1 | 1 LINC00378        | -      |
| ENSG00000225251 | 5.13E-15 | -2.63127 | 1 | 1 RPL5P25          | K02932 |
| ENSG00000225253 | 5.13E-15 | -2.63127 | 1 | 1 AC011225.1       | K09131 |
| ENSG00000225254 | 5.13E-15 | -2.63127 | 1 | 1 RP11-403F21.1    | -      |
| ENSG00000225255 | 5.13E-15 | -2.63127 | 1 | 1 LA16c-83F12.6    | -      |
| ENSG00000225256 | 5.13E-15 | -2.63127 | 1 | 1 TRAPPC2P5        | -      |
| ENSG00000225258 | 5.13E-15 | -2.63127 | 1 | 1 AC009478.1       | -      |
| ENSG00000225261 | 5.13E-15 | -2.63127 | 1 | 1 RP5-937E21.8     | -      |
| ENSG00000225267 | 5.13E-15 | -2.63127 | 1 | 1 RPL8P2           | K02938 |
| ENSG00000225269 | 5.13E-15 | -2.63127 | 1 | 1 LINC00705        | -      |
| ENSG00000225270 | 5.13E-15 | -2.63127 | 1 | 1 CICP12           | K16941 |
| ENSG00000225271 | 5.13E-15 | -2.63127 | 1 | 1 RP11-66N5.2      | -      |

|                 |          |          |   |                 |        |
|-----------------|----------|----------|---|-----------------|--------|
| ENSG00000225272 | 5.13E-15 | -2.63127 | 1 | 1 RP11-466F5.4  | K02889 |
| ENSG00000225275 | 5.13E-15 | -2.63127 | 1 | 1 NUP210P2      | K14314 |
| ENSG00000225276 | 5.13E-15 | -2.63127 | 1 | 1 MTND1P18      | K03878 |
| ENSG00000225279 | 5.13E-15 | -2.63127 | 1 | 1 RP11-536C5.2  | -      |
| ENSG00000225282 | 5.13E-15 | -2.63127 | 1 | 1 AP000350.6    | K10442 |
| ENSG00000225284 | 5.13E-15 | -2.63127 | 1 | 1 AC018693.6    | -      |
| ENSG00000225285 | 5.13E-15 | -2.63127 | 1 | 1 RP4-758J18.10 | -      |
| ENSG00000225286 | 5.13E-15 | -2.63127 | 1 | 1 AC005105.2    | -      |
| ENSG00000225287 | 5.13E-15 | -2.63127 | 1 | 1 OFD1P13Y      | K16480 |
| ENSG00000225289 | 5.13E-15 | -2.63127 | 1 | 1 RPL29P29      | -      |
| ENSG00000225292 | 5.13E-15 | -2.63127 | 1 | 1 RP11-57H14.3  | -      |
| ENSG00000225293 | 5.13E-15 | -2.63127 | 1 | 1 ABCD1P4       | K05675 |
| ENSG00000225294 | 5.13E-15 | -2.63127 | 1 | 1 OSTCP2        | -      |
| ENSG00000225295 | 5.13E-15 | -2.63127 | 1 | 1 MTND4P4       | K03881 |
| ENSG00000225297 | 5.13E-15 | -2.63127 | 1 | 1 RP4-612C19.2  | -      |
| ENSG00000225298 | 5.13E-15 | -2.63127 | 1 | 1 LINC00113     | -      |
| ENSG00000225299 | 5.13E-15 | -2.63127 | 1 | 1 RP11-344A5.1  | -      |
| ENSG00000225300 | 5.13E-15 | -2.63127 | 1 | 1 RP11-439E19.1 | -      |
| ENSG00000225302 | 5.13E-15 | -2.63127 | 1 | 1 RP11-539I5.1  | -      |
| ENSG00000225303 | 5.13E-15 | -2.63127 | 1 | 1 RP11-512N4.2  | -      |
| ENSG00000225304 | 5.13E-15 | -2.63127 | 1 | 1 AC106901.1    | -      |
| ENSG00000225308 | 5.13E-15 | -2.63127 | 1 | 1 ASS1P11       | K01940 |
| ENSG00000225310 | 5.13E-15 | -2.63127 | 1 | 1 DNAJC19P4     | -      |
| ENSG00000225311 | 5.13E-15 | -2.63127 | 1 | 1 RP1-91J24.3   | -      |
| ENSG00000225314 | 5.13E-15 | -2.63127 | 1 | 1 AC018634.9    | -      |
| ENSG00000225316 | 5.13E-15 | -2.63127 | 1 | 1 LINC00350     | -      |
| ENSG00000225321 | 5.13E-15 | -2.63127 | 1 | 1 RP5-828K20.2  | -      |
| ENSG00000225322 | 5.13E-15 | -2.63127 | 1 | 1 RP11-472D17.1 | -      |
| ENSG00000225323 | 5.13E-15 | -2.63127 | 1 | 1 Z84721.4      | -      |
| ENSG00000225325 | 5.13E-15 | -2.63127 | 1 | 1 RP11-479J7.1  | -      |
| ENSG00000225326 | 5.13E-15 | -2.63127 | 1 | 1 USP9YP19      | K11840 |
| ENSG00000225327 | 5.13E-15 | -2.63127 | 1 | 1 USP17L3       | K11845 |
| ENSG00000225328 | 5.13E-15 | -2.63127 | 1 | 1 AC019100.3    | -      |
| ENSG00000225329 | 5.13E-15 | -2.63127 | 1 | 1 RP11-325F22.5 | -      |
| ENSG00000225330 | 5.13E-15 | -2.63127 | 1 | 1 AF064860.5    | -      |
| ENSG00000225333 | 5.13E-15 | -2.63127 | 1 | 1 RP1-144F13.4  | -      |
| ENSG00000225334 | 5.13E-15 | -2.63127 | 1 | 1 RP11-449J1.1  | -      |
| ENSG00000225336 | 5.13E-15 | -2.63127 | 1 | 1 HMGB3P1       | K11296 |
| ENSG00000225337 | 5.13E-15 | -2.63127 | 1 | 1 RP11-561O23.7 | -      |
| ENSG00000225338 | 5.13E-15 | -2.63127 | 1 | 1 RP11-384C4.3  | K02893 |
| ENSG00000225339 | 5.13E-15 | -2.63127 | 1 | 1 RP11-513I15.6 | -      |
| ENSG00000225341 | 5.13E-15 | -2.63127 | 1 | 1 AC013269.4    | -      |
| ENSG00000225342 | 5.13E-15 | -2.63127 | 1 | 1 AC079630.4    | -      |
| ENSG00000225343 | 5.13E-15 | -2.63127 | 1 | 1 RPL21P66      | K02889 |
| ENSG00000225344 | 5.13E-15 | -2.63127 | 1 | 1 RP4-738P15.4  | -      |
| ENSG00000225347 | 5.13E-15 | -2.63127 | 1 | 1 SLC25A5P8     | K05863 |
| ENSG00000225349 | 5.13E-15 | -2.63127 | 1 | 1 RP11-820K3.2  | K09488 |
| ENSG00000225350 | 5.13E-15 | -2.63127 | 1 | 1 FREM2-AS1     | -      |
| ENSG00000225352 | 5.13E-15 | -2.63127 | 1 | 1 RPL31P53      | -      |
| ENSG00000225354 | 5.13E-15 | -2.63127 | 1 | 1 RP11-400G3.3  | K02936 |
| ENSG00000225355 | 5.13E-15 | -2.63127 | 1 | 1 ARL6IP1P2     | -      |
| ENSG00000225356 | 5.13E-15 | -2.63127 | 1 | 1 RP11-433O3.1  | K06737 |
| ENSG00000225357 | 5.13E-15 | -2.63127 | 1 | 1 RPF2P1        | K14847 |
| ENSG00000225358 | 5.13E-15 | -2.63127 | 1 | 1 MIPEPP1       | K01410 |
| ENSG00000225359 | 5.13E-15 | -2.63127 | 1 | 1 RP11-540K16.2 | -      |
| ENSG00000225360 | 5.13E-15 | -2.63127 | 1 | 1 RP11-149F8.4  | -      |
| ENSG00000225365 | 5.13E-15 | -2.63127 | 1 | 1 AC078942.1    | -      |
| ENSG00000225366 | 5.13E-15 | -2.63127 | 1 | 1 TDGF1P3       | -      |

|                 |          |          |   |                 |        |
|-----------------|----------|----------|---|-----------------|--------|
| ENSG00000225369 | 5.13E-15 | -2.63127 | 1 | 1 AC009506.2    | K10364 |
| ENSG00000225370 | 5.13E-15 | -2.63127 | 1 | 1 AC011515.2    | K06512 |
| ENSG00000225371 | 5.13E-15 | -2.63127 | 1 | 1 CICIP8        | K16941 |
| ENSG00000225376 | 5.13E-15 | -2.63127 | 1 | 1 RP11-490D19.6 | -      |
| ENSG00000225378 | 5.13E-15 | -2.63127 | 1 | 1 AC015977.6    | -      |
| ENSG00000225380 | 5.13E-15 | -2.63127 | 1 | 1 IGKV1OR9-2    | -      |
| ENSG00000225381 | 5.13E-15 | -2.63127 | 1 | 1 RPS5P7        | K02989 |
| ENSG00000225383 | 5.13E-15 | -2.63127 | 1 | 1 SFTA1P        | -      |
| ENSG00000225384 | 5.13E-15 | -2.63127 | 1 | 1 RP13-643D4.1  | K14376 |
| ENSG00000225386 | 5.13E-15 | -2.63127 | 1 | 1 AC099754.1    | -      |
| ENSG00000225387 | 5.13E-15 | -2.63127 | 1 | 1 RP11-422P22.1 | -      |
| ENSG00000225391 | 5.13E-15 | -2.63127 | 1 | 1 RP11-55K22.5  | -      |
| ENSG00000225393 | 5.13E-15 | -2.63127 | 1 | 1 RP11-218L14.4 | -      |
| ENSG00000225394 | 5.13E-15 | -2.63127 | 1 | 1 AC106883.1    | -      |
| ENSG00000225396 | 5.13E-15 | -2.63127 | 1 | 1 RP11-69A21.2  | -      |
| ENSG00000225397 | 5.13E-15 | -2.63127 | 1 | 1 RP11-552J9.13 | K00819 |
| ENSG00000225398 | 5.13E-15 | -2.63127 | 1 | 1 RP11-395L14.5 | K15636 |
| ENSG00000225399 | 5.13E-15 | -2.63127 | 1 | 1 RP11-3B7.1    | K04613 |
| ENSG00000225402 | 5.13E-15 | -2.63127 | 1 | 1 AC010878.3    | K13137 |
| ENSG00000225404 | 5.13E-15 | -2.63127 | 1 | 1 RPL26P34      | K02898 |
| ENSG00000225405 | 5.13E-15 | -2.63127 | 1 | 1 RP11-84A1.1   | K02957 |
| ENSG00000225406 | 5.13E-15 | -2.63127 | 1 | 1 AC080125.1    | K09428 |
| ENSG00000225407 | 5.13E-15 | -2.63127 | 1 | 1 CTD-2384B11.2 | -      |
| ENSG00000225410 | 5.13E-15 | -2.63127 | 1 | 1 AC107016.1    | K07604 |
| ENSG00000225411 | 5.13E-15 | -2.63127 | 1 | 1 RP11-764K9.1  | -      |
| ENSG00000225413 | 5.13E-15 | -2.63127 | 1 | 1 AP000345.4    | -      |
| ENSG00000225414 | 5.13E-15 | -2.63127 | 1 | 1 RP11-746P2.1  | -      |
| ENSG00000225415 | 5.13E-15 | -2.63127 | 1 | 1 RP3-509I19.1  | K04186 |
| ENSG00000225416 | 5.13E-15 | -2.63127 | 1 | 1 AC104843.3    | K02929 |
| ENSG00000225417 | 5.13E-15 | -2.63127 | 1 | 1 RP5-1178H5.2  | -      |
| ENSG00000225418 | 5.13E-15 | -2.63127 | 1 | 1 AKR1C5P       | K00037 |
| ENSG00000225421 | 5.13E-15 | -2.63127 | 1 | 1 AC019330.1    | -      |
| ENSG00000225423 | 5.13E-15 | -2.63127 | 1 | 1 TNPO1P1       | K18752 |
| ENSG00000225424 | 5.13E-15 | -2.63127 | 1 | 1 RP11-168C9.1  | -      |
| ENSG00000225427 | 5.13E-15 | -2.63127 | 1 | 1 LINC00331     | -      |
| ENSG00000225428 | 5.13E-15 | -2.63127 | 1 | 1 AC108479.1    | K03960 |
| ENSG00000225433 | 5.13E-15 | -2.63127 | 1 | 1 MTND1P12      | -      |
| ENSG00000225437 | 5.13E-15 | -2.63127 | 1 | 1 RP1-257A15.1  | -      |
| ENSG00000225438 | 5.13E-15 | -2.63127 | 1 | 1 KRT41P        | K07604 |
| ENSG00000225443 | 5.13E-15 | -2.63127 | 1 | 1 AC004938.5    | K02929 |
| ENSG00000225444 | 5.13E-15 | -2.63127 | 1 | 1 AC087073.1    | -      |
| ENSG00000225446 | 5.13E-15 | -2.63127 | 1 | 1 RP4-665J23.2  | -      |
| ENSG00000225448 | 5.13E-15 | -2.63127 | 1 | 1 AC009477.7    | -      |
| ENSG00000225449 | 5.13E-15 | -2.63127 | 1 | 1 RAB6C-AS1     | -      |
| ENSG00000225451 | 5.13E-15 | -2.63127 | 1 | 1 RP11-340I6.5  | K09228 |
| ENSG00000225455 | 5.13E-15 | -2.63127 | 1 | 1 TPI1P4        | K01803 |
| ENSG00000225457 | 5.13E-15 | -2.63127 | 1 | 1 RP11-736E3.1  | -      |
| ENSG00000225458 | 5.13E-15 | -2.63127 | 1 | 1 RP5-1121H13.4 | -      |
| ENSG00000225460 | 5.13E-15 | -2.63127 | 1 | 1 RP13-93L13.1  | K10704 |
| ENSG00000225462 | 5.13E-15 | -2.63127 | 1 | 1 FDPSP1        | K00787 |
| ENSG00000225463 | 5.13E-15 | -2.63127 | 1 | 1 ZNF70P1       | -      |
| ENSG00000225466 | 5.13E-15 | -2.63127 | 1 | 1 OFD1P10Y      | K16480 |
| ENSG00000225469 | 5.13E-15 | -2.63127 | 1 | 1 RP3-406C18.2  | -      |
| ENSG00000225471 | 5.13E-15 | -2.63127 | 1 | 1 RP11-262D11.2 | -      |
| ENSG00000225473 | 5.13E-15 | -2.63127 | 1 | 1 ATP13A4-AS1   | -      |
| ENSG00000225475 | 5.13E-15 | -2.63127 | 1 | 1 RP11-377K22.2 | K02981 |
| ENSG00000225476 | 5.13E-15 | -2.63127 | 1 | 1 AC013437.6    | K02262 |
| ENSG00000225477 | 5.13E-15 | -2.63127 | 1 | 1 CTD-2302A16.2 | K00030 |

|                 |          |          |   |                    |        |
|-----------------|----------|----------|---|--------------------|--------|
| ENSG00000225478 | 5.13E-15 | -2.63127 | 1 | 1 RP1-8B22.2       | K03878 |
| ENSG00000225479 | 5.13E-15 | -2.63127 | 1 | 1 PLCB1-IT1        | -      |
| ENSG00000225480 | 5.13E-15 | -2.63127 | 1 | 1 AC006548.19      | K01301 |
| ENSG00000225482 | 5.13E-15 | -2.63127 | 1 | 1 RP11-542E6.3     | -      |
| ENSG00000225483 | 5.13E-15 | -2.63127 | 1 | 1 RP11-38J22.2     | K02891 |
| ENSG00000225487 | 5.13E-15 | -2.63127 | 1 | 1 RP11-403P14.1    | K02917 |
| ENSG00000225488 | 5.13E-15 | -2.63127 | 1 | 1 RP11-760D2.1     | -      |
| ENSG00000225489 | 5.13E-15 | -2.63127 | 1 | 1 RP11-390F4.3     | -      |
| ENSG00000225490 | 5.13E-15 | -2.63127 | 1 | 1 RP4-610C12.3     | -      |
| ENSG00000225491 | 5.13E-15 | -2.63127 | 1 | 1 UBE2Q2P4Y        | K10582 |
| ENSG00000225492 | 5.13E-15 | -2.63127 | 1 | 1 GBP1P1           | -      |
| ENSG00000225493 | 5.13E-15 | -2.63127 | 1 | 1 LINC01107        | -      |
| ENSG00000225496 | 5.13E-15 | -2.63127 | 1 | 1 AC104651.2       | K15433 |
| ENSG00000225497 | 5.13E-15 | -2.63127 | 1 | 1 RP11-180I22.2    | -      |
| ENSG00000225498 | 5.13E-15 | -2.63127 | 1 | 1 AC002064.5       | -      |
| ENSG00000225499 | 5.13E-15 | -2.63127 | 1 | 1 RPL15P4          | K02877 |
| ENSG00000225501 | 5.13E-15 | -2.63127 | 1 | 1 SNRPF3           | K11098 |
| ENSG00000225502 | 5.13E-15 | -2.63127 | 1 | 1 GAPDHP16         | -      |
| ENSG00000225508 | 5.13E-15 | -2.63127 | 1 | 1 SSXP5            | K15624 |
| ENSG00000225509 | 5.13E-15 | -2.63127 | 1 | 1 AIFM1P1          | K04727 |
| ENSG00000225510 | 5.13E-15 | -2.63127 | 1 | 1 PCDH8P1          | K16499 |
| ENSG00000225513 | 5.13E-15 | -2.63127 | 1 | 1 RP11-165N19.2    | K02905 |
| ENSG00000225516 | 5.13E-15 | -2.63127 | 1 | 1 AC006156.1       | -      |
| ENSG00000225519 | 5.13E-15 | -2.63127 | 1 | 1 RP11-236B18.2    | -      |
| ENSG00000225520 | 5.13E-15 | -2.63127 | 1 | 1 TTTY16           | -      |
| ENSG00000225521 | 5.13E-15 | -2.63127 | 1 | 1 AC005237.4       | -      |
| ENSG00000225522 | 5.13E-15 | -2.63127 | 1 | 1 RP11-203F10.1    | -      |
| ENSG00000225523 | 5.13E-15 | -2.63127 | 1 | 1 IGKV6D-21        | -      |
| ENSG00000225528 | 5.13E-15 | -2.63127 | 1 | 1 RP3-370M22.8     | -      |
| ENSG00000225529 | 5.13E-15 | -2.63127 | 1 | 1 BX088645.3       | -      |
| ENSG00000225530 | 5.13E-15 | -2.63127 | 1 | 1 SP3P             | K09193 |
| ENSG00000225532 | 5.13E-15 | -2.63127 | 1 | 1 XX-C2158C6.3     | -      |
| ENSG00000225533 | 5.13E-15 | -2.63127 | 1 | 1 PAWRP1           | -      |
| ENSG00000225536 | 5.13E-15 | -2.63127 | 1 | 1 RP6-145B8.3      | K09553 |
| ENSG00000225537 | 5.13E-15 | -2.63127 | 1 | 1 AC073325.1       | -      |
| ENSG00000225538 | 5.13E-15 | -2.63127 | 1 | 1 OR5BE1P          | -      |
| ENSG00000225539 | 5.13E-15 | -2.63127 | 1 | 1 AC018799.1       | -      |
| ENSG00000225542 | 5.13E-15 | -2.63127 | 1 | 1 ZNF385D-AS1      | -      |
| ENSG00000225545 | 5.13E-15 | -2.63127 | 1 | 1 RP11-545I10.2    | -      |
| ENSG00000225546 | 5.13E-15 | -2.63127 | 1 | 1 RP11-328J2.1     | -      |
| ENSG00000225548 | 5.13E-15 | -2.63127 | 1 | 1 AC098973.2       | -      |
| ENSG00000225549 | 5.13E-15 | -2.63127 | 1 | 1 RP11-210H10__A.1 | -      |
| ENSG00000225551 | 5.13E-15 | -2.63127 | 1 | 1 RP11-19J3.5      | -      |
| ENSG00000225552 | 5.13E-15 | -2.63127 | 1 | 1 NAALADL2-AS1     | -      |
| ENSG00000225554 | 5.13E-15 | -2.63127 | 1 | 1 RP11-527D7.1     | -      |
| ENSG00000225557 | 5.13E-15 | -2.63127 | 1 | 1 Z95114.6         | -      |
| ENSG00000225558 | 5.13E-15 | -2.63127 | 1 | 1 UBE2D3P2         | K06689 |
| ENSG00000225559 | 5.13E-15 | -2.63127 | 1 | 1 AC083867.4       | -      |
| ENSG00000225560 | 5.13E-15 | -2.63127 | 1 | 1 FAM197Y8         | -      |
| ENSG00000225563 | 5.13E-15 | -2.63127 | 1 | 1 AC006076.1       | -      |
| ENSG00000225564 | 5.13E-15 | -2.63127 | 1 | 1 RP11-341A22.2    | -      |
| ENSG00000225569 | 5.13E-15 | -2.63127 | 1 | 1 CCT4P2           | K09496 |
| ENSG00000225570 | 5.13E-15 | -2.63127 | 1 | 1 AC013733.4       | -      |
| ENSG00000225574 | 5.13E-15 | -2.63127 | 1 | 1 DRAXINP1         | -      |
| ENSG00000225579 | 5.13E-15 | -2.63127 | 1 | 1 EDNRB-AS1        | -      |
| ENSG00000225581 | 5.13E-15 | -2.63127 | 1 | 1 TRIM53AP         | K12019 |
| ENSG00000225582 | 5.13E-15 | -2.63127 | 1 | 1 AC011193.1       | -      |
| ENSG00000225583 | 5.13E-15 | -2.63127 | 1 | 1 RP4-630C24.1     | -      |

|                 |          |          |   |                    |        |
|-----------------|----------|----------|---|--------------------|--------|
| ENSG00000225585 | 5.13E-15 | -2.63127 | 1 | 1 IPPKP1           | K10572 |
| ENSG00000225588 | 5.13E-15 | -2.63127 | 1 | 1 AC096669.1       | -      |
| ENSG00000225594 | 5.13E-15 | -2.63127 | 1 | 1 AC098826.4       | K09228 |
| ENSG00000225595 | 5.13E-15 | -2.63127 | 1 | 1 XXbac-BPG308K3.6 | -      |
| ENSG00000225597 | 5.13E-15 | -2.63127 | 1 | 1 FAM74A1          | -      |
| ENSG00000225598 | 5.13E-15 | -2.63127 | 1 | 1 RP11-339D23.1    | -      |
| ENSG00000225602 | 5.13E-15 | -2.63127 | 1 | 1 MTOR-AS1         | -      |
| ENSG00000225603 | 5.13E-15 | -2.63127 | 1 | 1 RP11-325P15.1    | K17392 |
| ENSG00000225605 | 5.13E-15 | -2.63127 | 1 | 1 RP11-550H2.1     | -      |
| ENSG00000225606 | 5.13E-15 | -2.63127 | 1 | 1 AC005281.2       | -      |
| ENSG00000225609 | 5.13E-15 | -2.63127 | 1 | 1 CDY20P           | K00653 |
| ENSG00000225610 | 5.13E-15 | -2.63127 | 1 | 1 AC007679.3       | -      |
| ENSG00000225611 | 5.13E-15 | -2.63127 | 1 | 1 RP11-70C1.1      | -      |
| ENSG00000225612 | 5.13E-15 | -2.63127 | 1 | 1 AC099552.2       | -      |
| ENSG00000225613 | 5.13E-15 | -2.63127 | 1 | 1 MIR133BHG        | -      |
| ENSG00000225614 | 5.13E-15 | -2.63127 | 1 | 1 ZNF469           | -      |
| ENSG00000225615 | 5.13E-15 | -2.63127 | 1 | 1 RBMY2UP          | -      |
| ENSG00000225616 | 5.13E-15 | -2.63127 | 1 | 1 RP4-604A21.1     | K02901 |
| ENSG00000225619 | 5.13E-15 | -2.63127 | 1 | 1 MYT1L-AS1        | -      |
| ENSG00000225620 | 5.13E-15 | -2.63127 | 1 | 1 RP11-569A11.2    | -      |
| ENSG00000225622 | 5.13E-15 | -2.63127 | 1 | 1 PPIAP17          | -      |
| ENSG00000225623 | 5.13E-15 | -2.63127 | 1 | 1 AGBL4-IT1        | -      |
| ENSG00000225624 | 5.13E-15 | -2.63127 | 1 | 1 TBL1YP1          | K04508 |
| ENSG00000225625 | 5.13E-15 | -2.63127 | 1 | 1 RP11-31H5.1      | -      |
| ENSG00000225626 | 5.13E-15 | -2.63127 | 1 | 1 C9orf135-AS1     | -      |
| ENSG00000225636 | 5.13E-15 | -2.63127 | 1 | 1 HNRNPA3P15       | K12741 |
| ENSG00000225638 | 5.13E-15 | -2.63127 | 1 | 1 PABPC1P12        | K13126 |
| ENSG00000225640 | 5.13E-15 | -2.63127 | 1 | 1 RP5-1022P6.4     | -      |
| ENSG00000225642 | 5.13E-15 | -2.63127 | 1 | 1 SNRPEP5          | K11097 |
| ENSG00000225644 | 5.13E-15 | -2.63127 | 1 | 1 RPL35AP4         | K02917 |
| ENSG00000225646 | 5.13E-15 | -2.63127 | 1 | 1 AC015815.7       | K04135 |
| ENSG00000225647 | 5.13E-15 | -2.63127 | 1 | 1 AC005487.2       | -      |
| ENSG00000225649 | 5.13E-15 | -2.63127 | 1 | 1 AC064875.2       | -      |
| ENSG00000225650 | 5.13E-15 | -2.63127 | 1 | 1 EIF2S2P5         | K03238 |
| ENSG00000225652 | 5.13E-15 | -2.63127 | 1 | 1 RP11-619F23.2    | -      |
| ENSG00000225653 | 5.13E-15 | -2.63127 | 1 | 1 RNF19BPY         | K11973 |
| ENSG00000225655 | 5.13E-15 | -2.63127 | 1 | 1 RP11-143M1.2     | -      |
| ENSG00000225656 | 5.13E-15 | -2.63127 | 1 | 1 RP5-858B6.1      | -      |
| ENSG00000225657 | 5.13E-15 | -2.63127 | 1 | 1 RP5-843L14.1     | -      |
| ENSG00000225658 | 5.13E-15 | -2.63127 | 1 | 1 TAF13P2          | -      |
| ENSG00000225660 | 5.13E-15 | -2.63127 | 1 | 1 RP1-73A14.1      | K14191 |
| ENSG00000225661 | 5.13E-15 | -2.63127 | 1 | 1 RPL14P5          | K02875 |
| ENSG00000225662 | 5.13E-15 | -2.63127 | 1 | 1 RP11-1036F1.1    | K02875 |
| ENSG00000225664 | 5.13E-15 | -2.63127 | 1 | 1 YWHAZP8          | K16197 |
| ENSG00000225665 | 5.13E-15 | -2.63127 | 1 | 1 SAR1P3           | K07953 |
| ENSG00000225669 | 5.13E-15 | -2.63127 | 1 | 1 AC068535.5       | K02893 |
| ENSG00000225670 | 5.13E-15 | -2.63127 | 1 | 1 CTA-134P22.2     | -      |
| ENSG00000225671 | 5.13E-15 | -2.63127 | 1 | 1 FCF1P6           | K14566 |
| ENSG00000225672 | 5.13E-15 | -2.63127 | 1 | 1 CCNT2P1          | K15188 |
| ENSG00000225673 | 5.13E-15 | -2.63127 | 1 | 1 RP11-641C17.3    | K14809 |
| ENSG00000225675 | 5.13E-15 | -2.63127 | 1 | 1 RP4-784A16.5     | -      |
| ENSG00000225676 | 5.13E-15 | -2.63127 | 1 | 1 RP3-438O4.4      | -      |
| ENSG00000225678 | 5.13E-15 | -2.63127 | 1 | 1 AP000619.5       | -      |
| ENSG00000225679 | 5.13E-15 | -2.63127 | 1 | 1 RP11-216M21.6    | K08458 |
| ENSG00000225680 | 5.13E-15 | -2.63127 | 1 | 1 AL163953.2       | -      |
| ENSG00000225681 | 5.13E-15 | -2.63127 | 1 | 1 AC005730.2       | -      |
| ENSG00000225683 | 5.13E-15 | -2.63127 | 1 | 1 AL078585.1       | -      |
| ENSG00000225684 | 5.13E-15 | -2.63127 | 1 | 1 FAM225B          | -      |

|                 |          |          |   |                    |        |
|-----------------|----------|----------|---|--------------------|--------|
| ENSG00000225685 | 5.13E-15 | -2.63127 | 1 | 1 TSPY5P           | K11284 |
| ENSG00000225689 | 5.13E-15 | -2.63127 | 1 | 1 RP1-30E17.2      | -      |
| ENSG00000225690 | 5.13E-15 | -2.63127 | 1 | 1 TREML5P          | K14364 |
| ENSG00000225698 | 5.13E-15 | -2.63127 | 1 | 1 IGHV3-72         | K06856 |
| ENSG00000225701 | 5.13E-15 | -2.63127 | 1 | 1 EIF4A1P13        | K03257 |
| ENSG00000225703 | 5.13E-15 | -2.63127 | 1 | 1 AC005522.7       | -      |
| ENSG00000225704 | 5.13E-15 | -2.63127 | 1 | 1 RP4-798A17.5     | K03104 |
| ENSG00000225705 | 5.13E-15 | -2.63127 | 1 | 1 AC004899.3       | K06639 |
| ENSG00000225706 | 5.13E-15 | -2.63127 | 1 | 1 RP11-75C9.1      | -      |
| ENSG00000225708 | 5.13E-15 | -2.63127 | 1 | 1 RP13-379L11.1    | -      |
| ENSG00000225710 | 5.13E-15 | -2.63127 | 1 | 1 RP5-875O13.6     | K16549 |
| ENSG00000225712 | 5.13E-15 | -2.63127 | 1 | 1 ATP5G2P1         | K02128 |
| ENSG00000225713 | 5.13E-15 | -2.63127 | 1 | 1 RPL30P1          | K02908 |
| ENSG00000225716 | 5.13E-15 | -2.63127 | 1 | 1 TCEB1P13         | K03872 |
| ENSG00000225719 | 5.13E-15 | -2.63127 | 1 | 1 NMNAT1P2         | K06210 |
| ENSG00000225720 | 5.13E-15 | -2.63127 | 1 | 1 RP4-742C19.12    | -      |
| ENSG00000225722 | 5.13E-15 | -2.63127 | 1 | 1 RP11-706O15.8    | K02896 |
| ENSG00000225723 | 5.13E-15 | -2.63127 | 1 | 1 MTND6P15         | -      |
| ENSG00000225724 | 5.13E-15 | -2.63127 | 1 | 1 LL22NC03-80A10.1 | K14964 |
| ENSG00000225725 | 5.13E-15 | -2.63127 | 1 | 1 FAM66E           | -      |
| ENSG00000225726 | 5.13E-15 | -2.63127 | 1 | 1 AC007000.10      | -      |
| ENSG00000225727 | 5.13E-15 | -2.63127 | 1 | 1 RP11-71C5.2      | -      |
| ENSG00000225728 | 5.13E-15 | -2.63127 | 1 | 1 RP6-191P20.3     | -      |
| ENSG00000225730 | 5.13E-15 | -2.63127 | 1 | 1 RP3-365O12.2     | -      |
| ENSG00000225735 | 5.13E-15 | -2.63127 | 1 | 1 NEK4P1           | K08857 |
| ENSG00000225738 | 5.13E-15 | -2.63127 | 1 | 1 NRG3-AS1         | -      |
| ENSG00000225739 | 5.13E-15 | -2.63127 | 1 | 1 NPM1P18          | K11276 |
| ENSG00000225740 | 5.13E-15 | -2.63127 | 1 | 1 TCEB1P6          | -      |
| ENSG00000225741 | 5.13E-15 | -2.63127 | 1 | 1 LL22NC03-88E1.17 | -      |
| ENSG00000225742 | 5.13E-15 | -2.63127 | 1 | 1 RP11-513G11.4    | -      |
| ENSG00000225746 | 5.13E-15 | -2.63127 | 1 | 1 AL132709.5       | -      |
| ENSG00000225750 | 5.13E-15 | -2.63127 | 1 | 1 RP11-242O24.3    | -      |
| ENSG00000225752 | 5.13E-15 | -2.63127 | 1 | 1 RP1-45I4.2       | -      |
| ENSG00000225755 | 5.13E-15 | -2.63127 | 1 | 1 RP11-267N12.2    | K00974 |
| ENSG00000225758 | 5.13E-15 | -2.63127 | 1 | 1 RPS17P17         | -      |
| ENSG00000225759 | 5.13E-15 | -2.63127 | 1 | 1 LINC00489        | -      |
| ENSG00000225761 | 5.13E-15 | -2.63127 | 1 | 1 RP11-417O11.5    | -      |
| ENSG00000225765 | 5.13E-15 | -2.63127 | 1 | 1 AC068535.3       | -      |
| ENSG00000225767 | 5.13E-15 | -2.63127 | 1 | 1 RP5-850O15.3     | -      |
| ENSG00000225769 | 5.13E-15 | -2.63127 | 1 | 1 CROCCP1          | K16469 |
| ENSG00000225770 | 5.13E-15 | -2.63127 | 1 | 1 AC092933.3       | K02980 |
| ENSG00000225774 | 5.13E-15 | -2.63127 | 1 | 1 SIRPAP1          | K06551 |
| ENSG00000225775 | 5.13E-15 | -2.63127 | 1 | 1 RP11-354I10.1    | -      |
| ENSG00000225777 | 5.13E-15 | -2.63127 | 1 | 1 DDX39AP1         | K13182 |
| ENSG00000225779 | 5.13E-15 | -2.63127 | 1 | 1 RP4-603I14.3     | -      |
| ENSG00000225781 | 5.13E-15 | -2.63127 | 1 | 1 OR6V1            | K04257 |
| ENSG00000225782 | 5.13E-15 | -2.63127 | 1 | 1 RP11-322F10.2    | -      |
| ENSG00000225784 | 5.13E-15 | -2.63127 | 1 | 1 RP11-592B15.4    | K07759 |
| ENSG00000225785 | 5.13E-15 | -2.63127 | 1 | 1 RP4-583K8.1      | -      |
| ENSG00000225786 | 5.13E-15 | -2.63127 | 1 | 1 AL590639.1       | K04613 |
| ENSG00000225787 | 5.13E-15 | -2.63127 | 1 | 1 LSM3P3           | K12622 |
| ENSG00000225790 | 5.13E-15 | -2.63127 | 1 | 1 RP11-2L8.1       | -      |
| ENSG00000225794 | 5.13E-15 | -2.63127 | 1 | 1 AC073321.4       | -      |
| ENSG00000225795 | 5.13E-15 | -2.63127 | 1 | 1 RP11-395G17.1    | K13708 |
| ENSG00000225796 | 5.13E-15 | -2.63127 | 1 | 1 MTND4P23         | K03881 |
| ENSG00000225797 | 5.13E-15 | -2.63127 | 1 | 1 UBDP1            | K12157 |
| ENSG00000225801 | 5.13E-15 | -2.63127 | 1 | 1 RABEPKP1         | -      |
| ENSG00000225802 | 5.13E-15 | -2.63127 | 1 | 1 RP11-1036E20.10  | -      |



|                 |          |          |   |                  |        |
|-----------------|----------|----------|---|------------------|--------|
| ENSG00000225803 | 5.13E-15 | -2.63127 | 1 | 1 MRPS11P1       | K02948 |
| ENSG00000225807 | 5.13E-15 | -2.63127 | 1 | 1 RP11-44M6.1    | -      |
| ENSG00000225809 | 5.13E-15 | -2.63127 | 1 | 1 RBMY2KP        | K12885 |
| ENSG00000225811 | 5.13E-15 | -2.63127 | 1 | 1 RP11-547I7.1   | -      |
| ENSG00000225812 | 5.13E-15 | -2.63127 | 1 | 1 RP11-157L3.3   | -      |
| ENSG00000225813 | 5.13E-15 | -2.63127 | 1 | 1 AC009299.4     | K09228 |
| ENSG00000225814 | 5.13E-15 | -2.63127 | 1 | 1 GRPEL2P2       | K03687 |
| ENSG00000225815 | 5.13E-15 | -2.63127 | 1 | 1 AC092669.6     | -      |
| ENSG00000225816 | 5.13E-15 | -2.63127 | 1 | 1 AC006045.3     | K09191 |
| ENSG00000225818 | 5.13E-15 | -2.63127 | 1 | 1 AC118653.2     | -      |
| ENSG00000225819 | 5.13E-15 | -2.63127 | 1 | 1 AC013269.3     | -      |
| ENSG00000225823 | 5.13E-15 | -2.63127 | 1 | 1 RPL7P45        | K02937 |
| ENSG00000225825 | 5.13E-15 | -2.63127 | 1 | 1 IGHD6-25       | -      |
| ENSG00000225827 | 5.13E-15 | -2.63127 | 1 | 1 SFTPA3P        | K10067 |
| ENSG00000225832 | 5.13E-15 | -2.63127 | 1 | 1 RP3-348I23.3   | K02929 |
| ENSG00000225836 | 5.13E-15 | -2.63127 | 1 | 1 RP11-80H5.6    | -      |
| ENSG00000225839 | 5.13E-15 | -2.63127 | 1 | 1 TRMT2B-AS1     | -      |
| ENSG00000225840 | 5.13E-15 | -2.63127 | 1 | 1 AC010970.2     | K01979 |
| ENSG00000225842 | 5.13E-15 | -2.63127 | 1 | 1 AC139712.1     | K00682 |
| ENSG00000225843 | 5.13E-15 | -2.63127 | 1 | 1 NIPA2P1        | -      |
| ENSG00000225846 | 5.13E-15 | -2.63127 | 1 | 1 RP11-630D6.1   | K02920 |
| ENSG00000225849 | 5.13E-15 | -2.63127 | 1 | 1 MKRN7P         | K15687 |
| ENSG00000225851 | 5.13E-15 | -2.63127 | 1 | 1 HLA-S          | -      |
| ENSG00000225856 | 5.13E-15 | -2.63127 | 1 | 1 PCNPP2         | -      |
| ENSG00000225857 | 5.13E-15 | -2.63127 | 1 | 1 RP11-46A10.2   | -      |
| ENSG00000225858 | 5.13E-15 | -2.63127 | 1 | 1 RP1-172N19.3   | K13213 |
| ENSG00000225860 | 5.13E-15 | -2.63127 | 1 | 1 RP11-1018N14.2 | -      |
| ENSG00000225864 | 5.13E-15 | -2.63127 | 1 | 1 HCG4P11        | K06751 |
| ENSG00000225867 | 5.13E-15 | -2.63127 | 1 | 1 RP5-1177I5.3   | -      |
| ENSG00000225868 | 5.13E-15 | -2.63127 | 1 | 1 AC016582.2     | -      |
| ENSG00000225869 | 5.13E-15 | -2.63127 | 1 | 1 CTB-70D19.1    | K09848 |
| ENSG00000225870 | 5.13E-15 | -2.63127 | 1 | 1 LINC00368      | -      |
| ENSG00000225872 | 5.13E-15 | -2.63127 | 1 | 1 AC002398.5     | -      |
| ENSG00000225873 | 5.13E-15 | -2.63127 | 1 | 1 LINC00694      | -      |
| ENSG00000225876 | 5.13E-15 | -2.63127 | 1 | 1 AC024067.1     | -      |
| ENSG00000225878 | 5.13E-15 | -2.63127 | 1 | 1 SERBP1P2       | K13199 |
| ENSG00000225879 | 5.13E-15 | -2.63127 | 1 | 1 RP3-495K2.3    | -      |
| ENSG00000225881 | 5.13E-15 | -2.63127 | 1 | 1 AC009365.4     | -      |
| ENSG00000225882 | 5.13E-15 | -2.63127 | 1 | 1 RP3-410B11.1   | -      |
| ENSG00000225884 | 5.13E-15 | -2.63127 | 1 | 1 AC098872.3     | -      |
| ENSG00000225885 | 5.13E-15 | -2.63127 | 1 | 1 AC023590.1     | -      |
| ENSG00000225886 | 5.13E-15 | -2.63127 | 1 | 1 RP11-288L9.4   | -      |
| ENSG00000225889 | 5.13E-15 | -2.63127 | 1 | 1 AC074289.1     | -      |
| ENSG00000225891 | 5.13E-15 | -2.63127 | 1 | 1 RP3-476K8.3    | -      |
| ENSG00000225893 | 5.13E-15 | -2.63127 | 1 | 1 RP11-6J24.3    | K02991 |
| ENSG00000225894 | 5.13E-15 | -2.63127 | 1 | 1 PPP1R26P2      | K17565 |
| ENSG00000225895 | 5.13E-15 | -2.63127 | 1 | 1 TRAPPC2P8      | -      |
| ENSG00000225896 | 5.13E-15 | -2.63127 | 1 | 1 AC007742.3     | -      |
| ENSG00000225898 | 5.13E-15 | -2.63127 | 1 | 1 AC002075.3     | -      |
| ENSG00000225899 | 5.13E-15 | -2.63127 | 1 | 1 FRG2B          | -      |
| ENSG00000225900 | 5.13E-15 | -2.63127 | 1 | 1 HSPE1P13       | K04078 |
| ENSG00000225901 | 5.13E-15 | -2.63127 | 1 | 1 MTND2P9        | K03879 |
| ENSG00000225903 | 5.13E-15 | -2.63127 | 1 | 1 RP1-144F13.3   | -      |
| ENSG00000225904 | 5.13E-15 | -2.63127 | 1 | 1 MORF4L1P7      | -      |
| ENSG00000225905 | 5.13E-15 | -2.63127 | 1 | 1 RP4-758J18.7   | -      |
| ENSG00000225906 | 5.13E-15 | -2.63127 | 1 | 1 AP000949.1     | -      |
| ENSG00000225907 | 5.13E-15 | -2.63127 | 1 | 1 RPS27P16       | K02978 |
| ENSG00000225911 | 5.13E-15 | -2.63127 | 1 | 1 AC009310.1     | -      |

|                 |          |          |   |                    |        |
|-----------------|----------|----------|---|--------------------|--------|
| ENSG00000225914 | 5.13E-15 | -2.63127 | 1 | 1 XXbac-BPG154L12. | _      |
| ENSG00000225916 | 5.13E-15 | -2.63127 | 1 | 1 AC007879.4       | -      |
| ENSG00000225918 | 5.13E-15 | -2.63127 | 1 | 1 RPL7P59          | K02937 |
| ENSG00000225919 | 5.13E-15 | -2.63127 | 1 | 1 RP11-66A2.1      | -      |
| ENSG00000225922 | 5.13E-15 | -2.63127 | 1 | 1 RP11-57G10.1     | K02889 |
| ENSG00000225923 | 5.13E-15 | -2.63127 | 1 | 1 RP4-736I12.1     | -      |
| ENSG00000225924 | 5.13E-15 | -2.63127 | 1 | 1 RP1-111D6.2      | -      |
| ENSG00000225925 | 5.13E-15 | -2.63127 | 1 | 1 RP13-313G19.2    | K16739 |
| ENSG00000225928 | 5.13E-15 | -2.63127 | 1 | 1 CACYBPP1         | K04507 |
| ENSG00000225929 | 5.13E-15 | -2.63127 | 1 | 1 AC000036.4       | -      |
| ENSG00000225930 | 5.13E-15 | -2.63127 | 1 | 1 AC026150.5       | -      |
| ENSG00000225931 | 5.13E-15 | -2.63127 | 1 | 1 RP3-395M20.7     | -      |
| ENSG00000225932 | 5.13E-15 | -2.63127 | 1 | 1 CTAGE4           | -      |
| ENSG00000225933 | 5.13E-15 | -2.63127 | 1 | 1 AC133965.1       | K02955 |
| ENSG00000225934 | 5.13E-15 | -2.63127 | 1 | 1 RP4-566D2.1      | -      |
| ENSG00000225935 | 5.13E-15 | -2.63127 | 1 | 1 BANF1P5          | -      |
| ENSG00000225936 | 5.13E-15 | -2.63127 | 1 | 1 RP11-501J20.5    | -      |
| ENSG00000225937 | 5.13E-15 | -2.63127 | 1 | 1 PCA3             | -      |
| ENSG00000225938 | 5.13E-15 | -2.63127 | 1 | 1 RP4-575N6.4      | -      |
| ENSG00000225940 | 5.13E-15 | -2.63127 | 1 | 1 AC022431.2       | -      |
| ENSG00000225942 | 5.13E-15 | -2.63127 | 1 | 1 AC093326.2       | -      |
| ENSG00000225943 | 5.13E-15 | -2.63127 | 1 | 1 AC016907.2       | -      |
| ENSG00000225944 | 5.13E-15 | -2.63127 | 1 | 1 RIOK3P1          | K08872 |
| ENSG00000225947 | 5.13E-15 | -2.63127 | 1 | 1 RP11-313E4.1     | K02951 |
| ENSG00000225948 | 5.13E-15 | -2.63127 | 1 | 1 RP11-554I8.1     | -      |
| ENSG00000225949 | 5.13E-15 | -2.63127 | 1 | 1 RP3-358H7.1      | -      |
| ENSG00000225952 | 5.13E-15 | -2.63127 | 1 | 1 RP11-69E9.1      | -      |
| ENSG00000225956 | 5.13E-15 | -2.63127 | 1 | 1 RP5-1077I2.3     | -      |
| ENSG00000225957 | 5.13E-15 | -2.63127 | 1 | 1 CTD-2267G17.2    | -      |
| ENSG00000225959 | 5.13E-15 | -2.63127 | 1 | 1 MTND4P3          | -      |
| ENSG00000225960 | 5.13E-15 | -2.63127 | 1 | 1 RP11-360A18.1    | -      |
| ENSG00000225962 | 5.13E-15 | -2.63127 | 1 | 1 RP11-459A10.2    | -      |
| ENSG00000225965 | 5.13E-15 | -2.63127 | 1 | 1 RP11-508N22.6    | -      |
| ENSG00000225970 | 5.13E-15 | -2.63127 | 1 | 1 RP3-526F5.2      | -      |
| ENSG00000225971 | 5.13E-15 | -2.63127 | 1 | 1 CTA-85E5.6       | K02984 |
| ENSG00000225974 | 5.13E-15 | -2.63127 | 1 | 1 AC005550.5       | -      |
| ENSG00000225978 | 5.13E-15 | -2.63127 | 1 | 1 HAR1A            | -      |
| ENSG00000225979 | 5.13E-15 | -2.63127 | 1 | 1 AC010746.3       | -      |
| ENSG00000225980 | 5.13E-15 | -2.63127 | 1 | 1 OR7E19P          | K04257 |
| ENSG00000225982 | 5.13E-15 | -2.63127 | 1 | 1 RP11-538D16.3    | -      |
| ENSG00000225984 | 5.13E-15 | -2.63127 | 1 | 1 HMGB1P26         | K10802 |
| ENSG00000225986 | 5.13E-15 | -2.63127 | 1 | 1 UBXM10-AS1       | -      |
| ENSG00000225988 | 5.13E-15 | -2.63127 | 1 | 1 RP5-1119D9.4     | -      |
| ENSG00000225990 | 5.13E-15 | -2.63127 | 1 | 1 SNRPEP7          | K11097 |
| ENSG00000225991 | 5.13E-15 | -2.63127 | 1 | 1 RP11-731I19.1    | K02893 |
| ENSG00000225992 | 5.13E-15 | -2.63127 | 1 | 1 TRGVA            | -      |
| ENSG00000225995 | 5.13E-15 | -2.63127 | 1 | 1 ATP5A1P9         | K02132 |
| ENSG00000225996 | 5.13E-15 | -2.63127 | 1 | 1 AL356356.1       | K15225 |
| ENSG00000225997 | 5.13E-15 | -2.63127 | 1 | 1 OR4A8P           | K04257 |
| ENSG00000225999 | 5.13E-15 | -2.63127 | 1 | 1 NDUFA12P1        | -      |
| ENSG00000226003 | 5.13E-15 | -2.63127 | 1 | 1 RP11-312J18.3    | K03767 |
| ENSG00000226004 | 5.13E-15 | -2.63127 | 1 | 1 RP11-10J5.1      | -      |
| ENSG00000226005 | 5.13E-15 | -2.63127 | 1 | 1 RP11-464C19.3    | -      |
| ENSG00000226007 | 5.13E-15 | -2.63127 | 1 | 1 RP11-211N8.2     | -      |
| ENSG00000226010 | 5.13E-15 | -2.63127 | 1 | 1 RP11-403E24.1    | K09228 |
| ENSG00000226011 | 5.13E-15 | -2.63127 | 1 | 1 OFD1P1Y          | K16480 |
| ENSG00000226012 | 5.13E-15 | -2.63127 | 1 | 1 AP001434.2       | -      |
| ENSG00000226013 | 5.13E-15 | -2.63127 | 1 | 1 MRPS18BP1        | -      |

|                 |          |          |   |                 |        |
|-----------------|----------|----------|---|-----------------|--------|
| ENSG00000226014 | 5.13E-15 | -2.63127 | 1 | 1 RP11-467I20.4 | _      |
| ENSG00000226016 | 5.13E-15 | -2.63127 | 1 | 1 RPL36AP55     | K02929 |
| ENSG00000226020 | 5.13E-15 | -2.63127 | 1 | 1 CDK2AP2P3     | _      |
| ENSG00000226022 | 5.13E-15 | -2.63127 | 1 | 1 AC026167.1    | _      |
| ENSG00000226023 | 5.13E-15 | -2.63127 | 1 | 1 CT47A6        | _      |
| ENSG00000226024 | 5.13E-15 | -2.63127 | 1 | 1 COX5BP7       | _      |
| ENSG00000226025 | 5.13E-15 | -2.63127 | 1 | 1 LGALS17A      | K13334 |
| ENSG00000226028 | 5.13E-15 | -2.63127 | 1 | 1 PFN1P12       | K05759 |
| ENSG00000226030 | 5.13E-15 | -2.63127 | 1 | 1 HLA-DQB3      | K06752 |
| ENSG00000226031 | 5.13E-15 | -2.63127 | 1 | 1 FGF13-AS1     | _      |
| ENSG00000226032 | 5.13E-15 | -2.63127 | 1 | 1 RP1-111C20.3  | _      |
| ENSG00000226034 | 5.13E-15 | -2.63127 | 1 | 1 NANOGNBP1     | _      |
| ENSG00000226036 | 5.13E-15 | -2.63127 | 1 | 1 RP11-338C15.2 | _      |
| ENSG00000226037 | 5.13E-15 | -2.63127 | 1 | 1 LINC01040     | _      |
| ENSG00000226038 | 5.13E-15 | -2.63127 | 1 | 1 PPIAP21       | K03767 |
| ENSG00000226041 | 5.13E-15 | -2.63127 | 1 | 1 AC010745.1    | _      |
| ENSG00000226042 | 5.13E-15 | -2.63127 | 1 | 1 CDY10P        | K00653 |
| ENSG00000226043 | 5.13E-15 | -2.63127 | 1 | 1 AP000705.7    | _      |
| ENSG00000226044 | 5.13E-15 | -2.63127 | 1 | 1 RP11-463P17.1 | _      |
| ENSG00000226045 | 5.13E-15 | -2.63127 | 1 | 1 AC009274.6    | K02435 |
| ENSG00000226046 | 5.13E-15 | -2.63127 | 1 | 1 AC007316.3    | K12394 |
| ENSG00000226047 | 5.13E-15 | -2.63127 | 1 | 1 RP11-196I18.4 | _      |
| ENSG00000226048 | 5.13E-15 | -2.63127 | 1 | 1 YBX1P8        | _      |
| ENSG00000226051 | 5.13E-15 | -2.63127 | 1 | 1 ZNF503-AS1    | _      |
| ENSG00000226053 | 5.13E-15 | -2.63127 | 1 | 1 RP5-1070A16.1 | _      |
| ENSG00000226056 | 5.13E-15 | -2.63127 | 1 | 1 MTND4P32      | _      |
| ENSG00000226057 | 5.13E-15 | -2.63127 | 1 | 1 PHF2P2        | K19414 |
| ENSG00000226059 | 5.13E-15 | -2.63127 | 1 | 1 HMGB3P20      | K11296 |
| ENSG00000226061 | 5.13E-15 | -2.63127 | 1 | 1 PCMTD1P1      | _      |
| ENSG00000226063 | 5.13E-15 | -2.63127 | 1 | 1 AC009531.2    | _      |
| ENSG00000226064 | 5.13E-15 | -2.63127 | 1 | 1 PGBD4P6       | _      |
| ENSG00000226066 | 5.13E-15 | -2.63127 | 1 | 1 AC009541.1    | _      |
| ENSG00000226067 | 5.13E-15 | -2.63127 | 1 | 1 LINC00869     | _      |
| ENSG00000226068 | 5.13E-15 | -2.63127 | 1 | 1 HNRNPA3P4     | K12741 |
| ENSG00000226070 | 5.13E-15 | -2.63127 | 1 | 1 RP11-552E20.4 | _      |
| ENSG00000226072 | 5.13E-15 | -2.63127 | 1 | 1 AC016772.4    | _      |
| ENSG00000226075 | 5.13E-15 | -2.63127 | 1 | 1 PHKG1P1       | K00871 |
| ENSG00000226078 | 5.13E-15 | -2.63127 | 1 | 1 RP11-205K6.2  | _      |
| ENSG00000226079 | 5.13E-15 | -2.63127 | 1 | 1 RP3-399L15.2  | _      |
| ENSG00000226080 | 5.13E-15 | -2.63127 | 1 | 1 RP11-345J13.1 | K02934 |
| ENSG00000226081 | 5.13E-15 | -2.63127 | 1 | 1 USP12PX       | K11842 |
| ENSG00000226082 | 5.13E-15 | -2.63127 | 1 | 1 RP11-24H1.1   | K02947 |
| ENSG00000226083 | 5.13E-15 | -2.63127 | 1 | 1 SLC39A12-AS1  | _      |
| ENSG00000226086 | 5.13E-15 | -2.63127 | 1 | 1 EIF3LP3       | K15029 |
| ENSG00000226087 | 5.13E-15 | -2.63127 | 1 | 1 AC106869.2    | _      |
| ENSG00000226089 | 5.13E-15 | -2.63127 | 1 | 1 RP1-300G12.2  | _      |
| ENSG00000226091 | 5.13E-15 | -2.63127 | 1 | 1 LINC00937     | _      |
| ENSG00000226092 | 5.13E-15 | -2.63127 | 1 | 1 RBMY2AP       | K12885 |
| ENSG00000226093 | 5.13E-15 | -2.63127 | 1 | 1 RPS28P8       | _      |
| ENSG00000226094 | 5.13E-15 | -2.63127 | 1 | 1 RPL7P3        | _      |
| ENSG00000226096 | 5.13E-15 | -2.63127 | 1 | 1 AC087499.9    | _      |
| ENSG00000226097 | 5.13E-15 | -2.63127 | 1 | 1 AC099342.1    | _      |
| ENSG00000226098 | 5.13E-15 | -2.63127 | 1 | 1 RP11-53M11.2  | K13280 |
| ENSG00000226101 | 5.13E-15 | -2.63127 | 1 | 1 AC007461.2    | _      |
| ENSG00000226102 | 5.13E-15 | -2.63127 | 1 | 1 SEPT7P3       | K16944 |
| ENSG00000226107 | 5.13E-15 | -2.63127 | 1 | 1 AC004383.3    | K02929 |
| ENSG00000226108 | 5.13E-15 | -2.63127 | 1 | 1 RP11-104G3.5  | K07915 |
| ENSG00000226110 | 5.13E-15 | -2.63127 | 1 | 1 RP11-272G22.2 | K02953 |

|                 |          |          |   |                 |        |
|-----------------|----------|----------|---|-----------------|--------|
| ENSG00000226112 | 5.13E-15 | -2.63127 | 1 | 1 FCF1P4        | K14566 |
| ENSG00000226113 | 5.13E-15 | -2.63127 | 1 | 1 RP11-672F9.1  | -      |
| ENSG00000226114 | 5.13E-15 | -2.63127 | 1 | 1 AC111200.8    | K03960 |
| ENSG00000226115 | 5.13E-15 | -2.63127 | 1 | 1 AP001476.3    | -      |
| ENSG00000226116 | 5.13E-15 | -2.63127 | 1 | 1 USP9YP6       | K11840 |
| ENSG00000226117 | 5.13E-15 | -2.63127 | 1 | 1 AC079199.2    | K02924 |
| ENSG00000226118 | 5.13E-15 | -2.63127 | 1 | 1 MTND3P1       | -      |
| ENSG00000226119 | 5.13E-15 | -2.63127 | 1 | 1 RP1-197J16.2  | -      |
| ENSG00000226122 | 5.13E-15 | -2.63127 | 1 | 1 AC018705.5    | -      |
| ENSG00000226125 | 5.13E-15 | -2.63127 | 1 | 1 AC098823.3    | -      |
| ENSG00000226126 | 5.13E-15 | -2.63127 | 1 | 1 PSMC1P12      | K03062 |
| ENSG00000226128 | 5.13E-15 | -2.63127 | 1 | 1 RPL26P9       | -      |
| ENSG00000226129 | 5.13E-15 | -2.63127 | 1 | 1 RP11-157L3.5  | -      |
| ENSG00000226130 | 5.13E-15 | -2.63127 | 1 | 1 AC013248.2    | -      |
| ENSG00000226131 | 5.13E-15 | -2.63127 | 1 | 1 AC073465.3    | K03767 |
| ENSG00000226132 | 5.13E-15 | -2.63127 | 1 | 1 RPS3AP46      | -      |
| ENSG00000226133 | 5.13E-15 | -2.63127 | 1 | 1 RP4-683M8.2   | -      |
| ENSG00000226134 | 5.13E-15 | -2.63127 | 1 | 1 RP11-120E13.1 | -      |
| ENSG00000226138 | 5.13E-15 | -2.63127 | 1 | 1 RP1-228P16.7  | K02151 |
| ENSG00000226140 | 5.13E-15 | -2.63127 | 1 | 1 RP11-461K13.1 | -      |
| ENSG00000226142 | 5.13E-15 | -2.63127 | 1 | 1 RPL35P8       | K02918 |
| ENSG00000226143 | 5.13E-15 | -2.63127 | 1 | 1 RP1-138B7.5   | -      |
| ENSG00000226144 | 5.13E-15 | -2.63127 | 1 | 1 RPS27AP3      | K02977 |
| ENSG00000226147 | 5.13E-15 | -2.63127 | 1 | 1 TUBBP10       | K07375 |
| ENSG00000226149 | 5.13E-15 | -2.63127 | 1 | 1 RP1-69D17.4   | -      |
| ENSG00000226157 | 5.13E-15 | -2.63127 | 1 | 1 OR52E3P       | K04257 |
| ENSG00000226158 | 5.13E-15 | -2.63127 | 1 | 1 CLCP2         | K13334 |
| ENSG00000226159 | 5.13E-15 | -2.63127 | 1 | 1 RP11-478K7.2  | -      |
| ENSG00000226160 | 5.13E-15 | -2.63127 | 1 | 1 LA16c-17H1.3  | -      |
| ENSG00000226161 | 5.13E-15 | -2.63127 | 1 | 1 EIF4A1P5      | K03257 |
| ENSG00000226163 | 5.13E-15 | -2.63127 | 1 | 1 RP11-167P22.3 | -      |
| ENSG00000226164 | 5.13E-15 | -2.63127 | 1 | 1 FGFR3P6       | -      |
| ENSG00000226166 | 5.13E-15 | -2.63127 | 1 | 1 RP11-474O21.2 | -      |
| ENSG00000226168 | 5.13E-15 | -2.63127 | 1 | 1 RP11-564C4.4  | -      |
| ENSG00000226169 | 5.13E-15 | -2.63127 | 1 | 1 RP11-375H17.1 | -      |
| ENSG00000226170 | 5.13E-15 | -2.63127 | 1 | 1 U82671.12     | -      |
| ENSG00000226172 | 5.13E-15 | -2.63127 | 1 | 1 RP4-712E4.1   | -      |
| ENSG00000226174 | 5.13E-15 | -2.63127 | 1 | 1 TEX22         | K11660 |
| ENSG00000226181 | 5.13E-15 | -2.63127 | 1 | 1 RP1-92C8.3    | -      |
| ENSG00000226183 | 5.13E-15 | -2.63127 | 1 | 1 RANP7         | K07936 |
| ENSG00000226185 | 5.13E-15 | -2.63127 | 1 | 1 TRIM64FP      | K12019 |
| ENSG00000226186 | 5.13E-15 | -2.63127 | 1 | 1 TCEB1P21      | K03872 |
| ENSG00000226188 | 5.13E-15 | -2.63127 | 1 | 1 HNRNPA1P3     | K12741 |
| ENSG00000226191 | 5.13E-15 | -2.63127 | 1 | 1 RP11-438H8.8  | K08823 |
| ENSG00000226194 | 5.13E-15 | -2.63127 | 1 | 1 RP1-137D17.1  | -      |
| ENSG00000226196 | 5.13E-15 | -2.63127 | 1 | 1 RP11-373J16.2 | K00134 |
| ENSG00000226197 | 5.13E-15 | -2.63127 | 1 | 1 RP11-536O18.1 | -      |
| ENSG00000226199 | 5.13E-15 | -2.63127 | 1 | 1 RP11-12D5.2   | -      |
| ENSG00000226202 | 5.13E-15 | -2.63127 | 1 | 1 RP11-328D5.1  | -      |
| ENSG00000226204 | 5.13E-15 | -2.63127 | 1 | 1 AL157359.3    | -      |
| ENSG00000226205 | 5.13E-15 | -2.63127 | 1 | 1 AC007790.4    | K02984 |
| ENSG00000226206 | 5.13E-15 | -2.63127 | 1 | 1 RP5-1050E16.2 | -      |
| ENSG00000226207 | 5.13E-15 | -2.63127 | 1 | 1 RP1-104O17.3  | -      |
| ENSG00000226208 | 5.13E-15 | -2.63127 | 1 | 1 RP11-99H8.1   | -      |
| ENSG00000226209 | 5.13E-15 | -2.63127 | 1 | 1 AL138764.1    | -      |
| ENSG00000226211 | 5.13E-15 | -2.63127 | 1 | 1 RP11-453O22.1 | K18708 |
| ENSG00000226212 | 5.13E-15 | -2.63127 | 1 | 1 TRGV6         | -      |
| ENSG00000226213 | 5.13E-15 | -2.63127 | 1 | 1 UBQLN4P2      | K04523 |

|                 |          |          |   |                   |        |
|-----------------|----------|----------|---|-------------------|--------|
| ENSG00000226216 | 5.13E-15 | -2.63127 | 1 | 1 RPS12P5         | K02951 |
| ENSG00000226217 | 5.13E-15 | -2.63127 | 1 | 1 RPL19P1         | K02885 |
| ENSG00000226218 | 5.13E-15 | -2.63127 | 1 | 1 AC079163.1      | –      |
| ENSG00000226222 | 5.13E-15 | -2.63127 | 1 | 1 RP11-753E22.3   | K11252 |
| ENSG00000226223 | 5.13E-15 | -2.63127 | 1 | 1 TSPY16P         | K11284 |
| ENSG00000226226 | 5.13E-15 | -2.63127 | 1 | 1 SLMO2P1         | –      |
| ENSG00000226229 | 5.13E-15 | -2.63127 | 1 | 1 RPLPOP1         | –      |
| ENSG00000226230 | 5.13E-15 | -2.63127 | 1 | 1 AC007237.2      | K12165 |
| ENSG00000226233 | 5.13E-15 | -2.63127 | 1 | 1 RP1-151B14.9    | K02924 |
| ENSG00000226234 | 5.13E-15 | -2.63127 | 1 | 1 KRT18P24        | K07604 |
| ENSG00000226235 | 5.13E-15 | -2.63127 | 1 | 1 LEMD1-AS1       | –      |
| ENSG00000226238 | 5.13E-15 | -2.63127 | 1 | 1 AC132807.1      | –      |
| ENSG00000226240 | 5.13E-15 | -2.63127 | 1 | 1 LINC00381       | –      |
| ENSG00000226242 | 5.13E-15 | -2.63127 | 1 | 1 RPS17P8         | K02962 |
| ENSG00000226246 | 5.13E-15 | -2.63127 | 1 | 1 KRT18P36        | K07604 |
| ENSG00000226249 | 5.13E-15 | -2.63127 | 1 | 1 RP11-307P5.2    | –      |
| ENSG00000226250 | 5.13E-15 | -2.63127 | 1 | 1 LINC00408       | –      |
| ENSG00000226252 | 5.13E-15 | -2.63127 | 1 | 1 RP1-18D14.7     | –      |
| ENSG00000226254 | 5.13E-15 | -2.63127 | 1 | 1 PTP4A1P3        | –      |
| ENSG00000226255 | 5.13E-15 | -2.63127 | 1 | 1 UBE2V2P1        | K10704 |
| ENSG00000226261 | 5.13E-15 | -2.63127 | 1 | 1 AC064836.3      | –      |
| ENSG00000226263 | 5.13E-15 | -2.63127 | 1 | 1 ISM1-AS1        | –      |
| ENSG00000226270 | 5.13E-15 | -2.63127 | 1 | 1 ZNF736P2Y       | K09228 |
| ENSG00000226272 | 5.13E-15 | -2.63127 | 1 | 1 ARHGAP26-AS1    | –      |
| ENSG00000226273 | 5.13E-15 | -2.63127 | 1 | 1 AC079305.5      | K09561 |
| ENSG00000226276 | 5.13E-15 | -2.63127 | 1 | 1 AC093382.1      | –      |
| ENSG00000226277 | 5.13E-15 | -2.63127 | 1 | 1 AC105393.2      | –      |
| ENSG00000226279 | 5.13E-15 | -2.63127 | 1 | 1 AC005682.7      | K02870 |
| ENSG00000226280 | 5.13E-15 | -2.63127 | 1 | 1 RP6-22P16.1     | K09228 |
| ENSG00000226284 | 5.13E-15 | -2.63127 | 1 | 1 ARPC3P1         | K05756 |
| ENSG00000226285 | 5.13E-15 | -2.63127 | 1 | 1 AC091813.2      | K14313 |
| ENSG00000226286 | 5.13E-15 | -2.63127 | 1 | 1 RP1-163G9.2     | –      |
| ENSG00000226288 | 5.13E-15 | -2.63127 | 1 | 1 OR52I2          | K04257 |
| ENSG00000226289 | 5.13E-15 | -2.63127 | 1 | 1 RP11-57I17.3    | –      |
| ENSG00000226292 | 5.13E-15 | -2.63127 | 1 | 1 RP11-7G12.1     | K02984 |
| ENSG00000226296 | 5.13E-15 | -2.63127 | 1 | 1 RP11-71J2.1     | –      |
| ENSG00000226297 | 5.13E-15 | -2.63127 | 1 | 1 AC007677.2      | K02880 |
| ENSG00000226298 | 5.13E-15 | -2.63127 | 1 | 1 RAD23BLP        | –      |
| ENSG00000226299 | 5.13E-15 | -2.63127 | 1 | 1 RP6-29D12.4     | K02998 |
| ENSG00000226301 | 5.13E-15 | -2.63127 | 1 | 1 PDCL3P1         | –      |
| ENSG00000226302 | 5.13E-15 | -2.63127 | 1 | 1 RP11-528N21.1   | –      |
| ENSG00000226304 | 5.13E-15 | -2.63127 | 1 | 1 RP11-435M3.2    | –      |
| ENSG00000226307 | 5.13E-15 | -2.63127 | 1 | 1 HNRNPDLP1       | –      |
| ENSG00000226308 | 5.13E-15 | -2.63127 | 1 | 1 RP4-813D12.3    | –      |
| ENSG00000226309 | 5.13E-15 | -2.63127 | 1 | 1 SMARCE1P2       | K11651 |
| ENSG00000226313 | 5.13E-15 | -2.63127 | 1 | 1 RP11-585K14.2   | K00412 |
| ENSG00000226317 | 5.13E-15 | -2.63127 | 1 | 1 LINC00351       | –      |
| ENSG00000226320 | 5.13E-15 | -2.63127 | 1 | 1 AC018359.1      | –      |
| ENSG00000226323 | 5.13E-15 | -2.63127 | 1 | 1 AC006150.1      | –      |
| ENSG00000226324 | 5.13E-15 | -2.63127 | 1 | 1 RP11-115M14.1   | –      |
| ENSG00000226327 | 5.13E-15 | -2.63127 | 1 | 1 RP11-350G13.1   | K02998 |
| ENSG00000226331 | 5.13E-15 | -2.63127 | 1 | 1 AC009302.4      | K02893 |
| ENSG00000226334 | 5.13E-15 | -2.63127 | 1 | 1 RP11-217B7.2    | –      |
| ENSG00000226335 | 5.13E-15 | -2.63127 | 1 | 1 XXyac-YX155B6.6 | –      |
| ENSG00000226336 | 5.13E-15 | -2.63127 | 1 | 1 MRPS16P3        | –      |
| ENSG00000226337 | 5.13E-15 | -2.63127 | 1 | 1 RP11-274B18.4   | –      |
| ENSG00000226338 | 5.13E-15 | -2.63127 | 1 | 1 AC079150.2      | –      |
| ENSG00000226339 | 5.13E-15 | -2.63127 | 1 | 1 RPS26P56        | K02976 |

|                 |          |          |   |                 |        |
|-----------------|----------|----------|---|-----------------|--------|
| ENSG00000226340 | 5.13E-15 | -2.63127 | 1 | 1 AC105402.3    | K11839 |
| ENSG00000226341 | 5.13E-15 | -2.63127 | 1 | 1 AC062016.2    | -      |
| ENSG00000226342 | 5.13E-15 | -2.63127 | 1 | 1 NMD3P1        | K07562 |
| ENSG00000226344 | 5.13E-15 | -2.63127 | 1 | 1 CST12P        | -      |
| ENSG00000226345 | 5.13E-15 | -2.63127 | 1 | 1 AC083822.2    | -      |
| ENSG00000226348 | 5.13E-15 | -2.63127 | 1 | 1 VN2R10P       | -      |
| ENSG00000226349 | 5.13E-15 | -2.63127 | 1 | 1 RP11-145A3.2  | -      |
| ENSG00000226353 | 5.13E-15 | -2.63127 | 1 | 1 TAF9P1        | K18532 |
| ENSG00000226355 | 5.13E-15 | -2.63127 | 1 | 1 RP11-65J3.2   | -      |
| ENSG00000226356 | 5.13E-15 | -2.63127 | 1 | 1 RPS6P20       | K02991 |
| ENSG00000226358 | 5.13E-15 | -2.63127 | 1 | 1 KRT8P38       | K07605 |
| ENSG00000226361 | 5.13E-15 | -2.63127 | 1 | 1 TERF1P5       | K11110 |
| ENSG00000226362 | 5.13E-15 | -2.63127 | 1 | 1 FAM41AY2      | -      |
| ENSG00000226363 | 5.13E-15 | -2.63127 | 1 | 1 AC009336.24   | -      |
| ENSG00000226366 | 5.13E-15 | -2.63127 | 1 | 1 AC097463.1    | K12871 |
| ENSG00000226367 | 5.13E-15 | -2.63127 | 1 | 1 ST7-AS2       | -      |
| ENSG00000226368 | 5.13E-15 | -2.63127 | 1 | 1 BX088645.2    | -      |
| ENSG00000226369 | 5.13E-15 | -2.63127 | 1 | 1 USP9YP11      | -      |
| ENSG00000226370 | 5.13E-15 | -2.63127 | 1 | 1 LINC00375     | -      |
| ENSG00000226372 | 5.13E-15 | -2.63127 | 1 | 1 DCAF8L1       | K11804 |
| ENSG00000226374 | 5.13E-15 | -2.63127 | 1 | 1 RP13-614K11.2 | -      |
| ENSG00000226375 | 5.13E-15 | -2.63127 | 1 | 1 RP3-395P12.2  | -      |
| ENSG00000226376 | 5.13E-15 | -2.63127 | 1 | 1 RP11-29B9.1   | -      |
| ENSG00000226377 | 5.13E-15 | -2.63127 | 1 | 1 AC084809.2    | -      |
| ENSG00000226380 | 5.13E-15 | -2.63127 | 1 | 1 MIR29A        | -      |
| ENSG00000226383 | 5.13E-15 | -2.63127 | 1 | 1 AC093375.1    | -      |
| ENSG00000226387 | 5.13E-15 | -2.63127 | 1 | 1 SORCS3-AS1    | -      |
| ENSG00000226388 | 5.13E-15 | -2.63127 | 1 | 1 ELL2P4        | K15183 |
| ENSG00000226389 | 5.13E-15 | -2.63127 | 1 | 1 RP11-507K13.4 | K06855 |
| ENSG00000226390 | 5.13E-15 | -2.63127 | 1 | 1 RP11-358D14.2 | -      |
| ENSG00000226392 | 5.13E-15 | -2.63127 | 1 | 1 RP4-736H5.1   | -      |
| ENSG00000226393 | 5.13E-15 | -2.63127 | 1 | 1 IFNA20P       | -      |
| ENSG00000226394 | 5.13E-15 | -2.63127 | 1 | 1 RP11-413E1.2  | K03948 |
| ENSG00000226395 | 5.13E-15 | -2.63127 | 1 | 1 RP11-218D6.3  | -      |
| ENSG00000226397 | 5.13E-15 | -2.63127 | 1 | 1 C12orf77      | K08834 |
| ENSG00000226398 | 5.13E-15 | -2.63127 | 1 | 1 AC013480.2    | -      |
| ENSG00000226400 | 5.13E-15 | -2.63127 | 1 | 1 CTD-2269E23.2 | K17608 |
| ENSG00000226401 | 5.13E-15 | -2.63127 | 1 | 1 RP5-965K10.3  | K03323 |
| ENSG00000226405 | 5.13E-15 | -2.63127 | 1 | 1 RP5-984P4.1   | K10251 |
| ENSG00000226406 | 5.13E-15 | -2.63127 | 1 | 1 RBMX2P1       | K13107 |
| ENSG00000226407 | 5.13E-15 | -2.63127 | 1 | 1 RPL23P11      | K02894 |
| ENSG00000226409 | 5.13E-15 | -2.63127 | 1 | 1 RP11-735G4.1  | -      |
| ENSG00000226410 | 5.13E-15 | -2.63127 | 1 | 1 AC104058.1    | -      |
| ENSG00000226411 | 5.13E-15 | -2.63127 | 1 | 1 CTD-2526L21.2 | K00871 |
| ENSG00000226412 | 5.13E-15 | -2.63127 | 1 | 1 RP11-476F14.1 | -      |
| ENSG00000226414 | 5.13E-15 | -2.63127 | 1 | 1 RP11-375A20.1 | K00412 |
| ENSG00000226420 | 5.13E-15 | -2.63127 | 1 | 1 IGLV3-4       | -      |
| ENSG00000226421 | 5.13E-15 | -2.63127 | 1 | 1 SLC25A5P5     | K05863 |
| ENSG00000226425 | 5.13E-15 | -2.63127 | 1 | 1 RP11-348J12.2 | -      |
| ENSG00000226426 | 5.13E-15 | -2.63127 | 1 | 1 RP11-174J11.1 | -      |
| ENSG00000226427 | 5.13E-15 | -2.63127 | 1 | 1 HMGN2P7       | K11300 |
| ENSG00000226429 | 5.13E-15 | -2.63127 | 1 | 1 RP11-111F5.6  | -      |
| ENSG00000226430 | 5.13E-15 | -2.63127 | 1 | 1 USP17L7       | K11845 |
| ENSG00000226431 | 5.13E-15 | -2.63127 | 1 | 1 RP11-416N2.3  | -      |
| ENSG00000226433 | 5.13E-15 | -2.63127 | 1 | 1 AP000290.7    | -      |
| ENSG00000226434 | 5.13E-15 | -2.63127 | 1 | 1 RP11-1L9.1    | -      |
| ENSG00000226435 | 5.13E-15 | -2.63127 | 1 | 1 ANKRD18DP     | -      |
| ENSG00000226436 | 5.13E-15 | -2.63127 | 1 | 1 RP1-22N22.1   | K11253 |

|                 |          |          |   |                    |        |
|-----------------|----------|----------|---|--------------------|--------|
| ENSG00000226439 | 5.13E-15 | -2.63127 | 1 | 1 RP11-621K7.1     | K02951 |
| ENSG00000226441 | 5.13E-15 | -2.63127 | 1 | 1 PLCL2-AS1        | -      |
| ENSG00000226442 | 5.13E-15 | -2.63127 | 1 | 1 AC006037.2       | -      |
| ENSG00000226443 | 5.13E-15 | -2.63127 | 1 | 1 GAPDHP32         | K00134 |
| ENSG00000226444 | 5.13E-15 | -2.63127 | 1 | 1 ACTR3BP6         | K18584 |
| ENSG00000226446 | 5.13E-15 | -2.63127 | 1 | 1 NOTCH2P1         | K02599 |
| ENSG00000226447 | 5.13E-15 | -2.63127 | 1 | 1 RP11-393J16.4    | -      |
| ENSG00000226448 | 5.13E-15 | -2.63127 | 1 | 1 RP11-93L14.1     | K02936 |
| ENSG00000226449 | 5.13E-15 | -2.63127 | 1 | 1 CDY5P            | -      |
| ENSG00000226454 | 5.13E-15 | -2.63127 | 1 | 1 RP3-462C17.1     | -      |
| ENSG00000226455 | 5.13E-15 | -2.63127 | 1 | 1 RP3-512E2.2      | -      |
| ENSG00000226457 | 5.13E-15 | -2.63127 | 1 | 1 RP11-430L17.1    | K02891 |
| ENSG00000226461 | 5.13E-15 | -2.63127 | 1 | 1 OR10G5P          | K04257 |
| ENSG00000226466 | 5.13E-15 | -2.63127 | 1 | 1 RPA2P2           | K10739 |
| ENSG00000226468 | 5.13E-15 | -2.63127 | 1 | 1 AC018641.7       | K00948 |
| ENSG00000226470 | 5.13E-15 | -2.63127 | 1 | 1 RP11-132E11.3    | -      |
| ENSG00000226473 | 5.13E-15 | -2.63127 | 1 | 1 AC079807.1       | K03767 |
| ENSG00000226474 | 5.13E-15 | -2.63127 | 1 | 1 LA16c-2F2.5      | K13241 |
| ENSG00000226476 | 5.13E-15 | -2.63127 | 1 | 1 RP11-776H12.1    | -      |
| ENSG00000226477 | 5.13E-15 | -2.63127 | 1 | 1 LL22NC03-84E4.11 | -      |
| ENSG00000226480 | 5.13E-15 | -2.63127 | 1 | 1 OR7H1P           | K04257 |
| ENSG00000226481 | 5.13E-15 | -2.63127 | 1 | 1 ACTR3BP2         | K18584 |
| ENSG00000226482 | 5.13E-15 | -2.63127 | 1 | 1 ADIPOQ-AS1       | -      |
| ENSG00000226483 | 5.13E-15 | -2.63127 | 1 | 1 RP5-964H19.2     | -      |
| ENSG00000226484 | 5.13E-15 | -2.63127 | 1 | 1 RP11-87M18.2     | -      |
| ENSG00000226485 | 5.13E-15 | -2.63127 | 1 | 1 RBM22P3          | K12872 |
| ENSG00000226486 | 5.13E-15 | -2.63127 | 1 | 1 LINC01035        | -      |
| ENSG00000226487 | 5.13E-15 | -2.63127 | 1 | 1 RP4-749H3.2      | -      |
| ENSG00000226488 | 5.13E-15 | -2.63127 | 1 | 1 AC021021.2       | -      |
| ENSG00000226489 | 5.13E-15 | -2.63127 | 1 | 1 AC104308.2       | K02929 |
| ENSG00000226490 | 5.13E-15 | -2.63127 | 1 | 1 AC138647.1       | -      |
| ENSG00000226491 | 5.13E-15 | -2.63127 | 1 | 1 FTOP1            | K19469 |
| ENSG00000226498 | 5.13E-15 | -2.63127 | 1 | 1 RP11-182B22.2    | K02998 |
| ENSG00000226500 | 5.13E-15 | -2.63127 | 1 | 1 RP11-196G18.1    | K06689 |
| ENSG00000226501 | 5.13E-15 | -2.63127 | 1 | 1 USF1P1           | K09106 |
| ENSG00000226502 | 5.13E-15 | -2.63127 | 1 | 1 KRT8P27          | K07605 |
| ENSG00000226504 | 5.13E-15 | -2.63127 | 1 | 1 TMEM167AP1       | -      |
| ENSG00000226506 | 5.13E-15 | -2.63127 | 1 | 1 AC007463.2       | -      |
| ENSG00000226507 | 5.13E-15 | -2.63127 | 1 | 1 IPMKP1           | K00915 |
| ENSG00000226508 | 5.13E-15 | -2.63127 | 1 | 1 AC104655.3       | -      |
| ENSG00000226509 | 5.13E-15 | -2.63127 | 1 | 1 AC005588.2       | -      |
| ENSG00000226510 | 5.13E-15 | -2.63127 | 1 | 1 UPK1A-AS1        | -      |
| ENSG00000226515 | 5.13E-15 | -2.63127 | 1 | 1 AC004386.3       | K02924 |
| ENSG00000226516 | 5.13E-15 | -2.63127 | 1 | 1 FAM138B          | -      |
| ENSG00000226519 | 5.13E-15 | -2.63127 | 1 | 1 LINC00390        | -      |
| ENSG00000226521 | 5.13E-15 | -2.63127 | 1 | 1 AC126365.1       | K04688 |
| ENSG00000226522 | 5.13E-15 | -2.63127 | 1 | 1 AC004744.3       | -      |
| ENSG00000226523 | 5.13E-15 | -2.63127 | 1 | 1 AC074375.1       | -      |
| ENSG00000226526 | 5.13E-15 | -2.63127 | 1 | 1 RP1-37C10.3      | -      |
| ENSG00000226527 | 5.13E-15 | -2.63127 | 1 | 1 AP000289.6       | -      |
| ENSG00000226529 | 5.13E-15 | -2.63127 | 1 | 1 MTND1P1          | -      |
| ENSG00000226530 | 5.13E-15 | -2.63127 | 1 | 1 RP11-348F1.2     | -      |
| ENSG00000226532 | 5.13E-15 | -2.63127 | 1 | 1 RP5-1052M9.1     | K02942 |
| ENSG00000226533 | 5.13E-15 | -2.63127 | 1 | 1 BTBD9-AS1        | -      |
| ENSG00000226534 | 5.13E-15 | -2.63127 | 1 | 1 KB-1183D5.16     | -      |
| ENSG00000226535 | 5.13E-15 | -2.63127 | 1 | 1 RP11-417L14.1    | K15043 |
| ENSG00000226536 | 5.13E-15 | -2.63127 | 1 | 1 SETP15           | K11290 |
| ENSG00000226537 | 5.13E-15 | -2.63127 | 1 | 1 OR7E33P          | K04257 |

|                 |          |          |   |                 |        |
|-----------------|----------|----------|---|-----------------|--------|
| ENSG00000226540 | 5.13E-15 | -2.63127 | 1 | 1 GAPDHP73      | K00134 |
| ENSG00000226541 | 5.13E-15 | -2.63127 | 1 | 1 RP11-795J1.2  | -      |
| ENSG00000226542 | 5.13E-15 | -2.63127 | 1 | 1 AC114814.4    | -      |
| ENSG00000226543 | 5.13E-15 | -2.63127 | 1 | 1 MYL6P1        | K12751 |
| ENSG00000226545 | 5.13E-15 | -2.63127 | 1 | 1 RP4-633I8.3   | K02901 |
| ENSG00000226546 | 5.13E-15 | -2.63127 | 1 | 1 RP11-34H11.5  | -      |
| ENSG00000226547 | 5.13E-15 | -2.63127 | 1 | 1 SSU72P1       | K15544 |
| ENSG00000226552 | 5.13E-15 | -2.63127 | 1 | 1 RP5-1092L12.2 | K10770 |
| ENSG00000226553 | 5.13E-15 | -2.63127 | 1 | 1 AC018735.1    | K00088 |
| ENSG00000226554 | 5.13E-15 | -2.63127 | 1 | 1 SOGA2P1       | -      |
| ENSG00000226555 | 5.13E-15 | -2.63127 | 1 | 1 AGKP1         | K09881 |
| ENSG00000226556 | 5.13E-15 | -2.63127 | 1 | 1 NPM1P49       | K11276 |
| ENSG00000226557 | 5.13E-15 | -2.63127 | 1 | 1 TRAF6P1       | K03175 |
| ENSG00000226558 | 5.13E-15 | -2.63127 | 1 | 1 RP11-213N20.1 | -      |
| ENSG00000226565 | 5.13E-15 | -2.63127 | 1 | 1 RP11-164O23.5 | -      |
| ENSG00000226566 | 5.13E-15 | -2.63127 | 1 | 1 RP11-436F21.1 | -      |
| ENSG00000226567 | 5.13E-15 | -2.63127 | 1 | 1 LINC00606     | -      |
| ENSG00000226570 | 5.13E-15 | -2.63127 | 1 | 1 RP11-505O17.1 | K06741 |
| ENSG00000226571 | 5.13E-15 | -2.63127 | 1 | 1 RP11-445F6.2  | -      |
| ENSG00000226572 | 5.13E-15 | -2.63127 | 1 | 1 SNORD57       | -      |
| ENSG00000226573 | 5.13E-15 | -2.63127 | 1 | 1 CTA-85E5.7    | K02920 |
| ENSG00000226574 | 5.13E-15 | -2.63127 | 1 | 1 SPANXA2-OT1   | -      |
| ENSG00000226576 | 5.13E-15 | -2.63127 | 1 | 1 RP11-523O18.1 | -      |
| ENSG00000226577 | 5.13E-15 | -2.63127 | 1 | 1 MICC          | K07985 |
| ENSG00000226578 | 5.13E-15 | -2.63127 | 1 | 1 RP11-258F22.1 | -      |
| ENSG00000226579 | 5.13E-15 | -2.63127 | 1 | 1 RP11-351K23.3 | K00412 |
| ENSG00000226581 | 5.13E-15 | -2.63127 | 1 | 1 RP11-340I6.8  | -      |
| ENSG00000226582 | 5.13E-15 | -2.63127 | 1 | 1 UBE2V1P5      | K10704 |
| ENSG00000226587 | 5.13E-15 | -2.63127 | 1 | 1 RP5-905H7.9   | -      |
| ENSG00000226590 | 5.13E-15 | -2.63127 | 1 | 1 UBE2V1P10     | K10704 |
| ENSG00000226592 | 5.13E-15 | -2.63127 | 1 | 1 AC004911.2    | -      |
| ENSG00000226594 | 5.13E-15 | -2.63127 | 1 | 1 RP11-550C4.6  | -      |
| ENSG00000226595 | 5.13E-15 | -2.63127 | 1 | 1 KB-288A10.19  | -      |
| ENSG00000226597 | 5.13E-15 | -2.63127 | 1 | 1 IFNWP9        | K05440 |
| ENSG00000226598 | 5.13E-15 | -2.63127 | 1 | 1 AC017060.1    | -      |
| ENSG00000226599 | 5.13E-15 | -2.63127 | 1 | 1 RP11-136K14.3 | -      |
| ENSG00000226600 | 5.13E-15 | -2.63127 | 1 | 1 CT47A9        | -      |
| ENSG00000226601 | 5.13E-15 | -2.63127 | 1 | 1 RP11-239E10.3 | -      |
| ENSG00000226605 | 5.13E-15 | -2.63127 | 1 | 1 AC007098.1    | -      |
| ENSG00000226611 | 5.13E-15 | -2.63127 | 1 | 1 OFD1P2Y       | K16480 |
| ENSG00000226613 | 5.13E-15 | -2.63127 | 1 | 1 GHc-1077H7.2  | -      |
| ENSG00000226615 | 5.13E-15 | -2.63127 | 1 | 1 AC018696.1    | K14958 |
| ENSG00000226616 | 5.13E-15 | -2.63127 | 1 | 1 OR52M2P       | K04257 |
| ENSG00000226617 | 5.13E-15 | -2.63127 | 1 | 1 RPL21P110     | K02889 |
| ENSG00000226619 | 5.13E-15 | -2.63127 | 1 | 1 RP11-301J16.7 | -      |
| ENSG00000226620 | 5.13E-15 | -2.63127 | 1 | 1 LINC00343     | -      |
| ENSG00000226621 | 5.13E-15 | -2.63127 | 1 | 1 AC083855.5    | K02872 |
| ENSG00000226622 | 5.13E-15 | -2.63127 | 1 | 1 AC092155.4    | -      |
| ENSG00000226624 | 5.13E-15 | -2.63127 | 1 | 1 CTA-351J1.1   | K02872 |
| ENSG00000226625 | 5.13E-15 | -2.63127 | 1 | 1 RP11-290L7.2  | K12840 |
| ENSG00000226626 | 5.13E-15 | -2.63127 | 1 | 1 RP11-315I14.5 | K14564 |
| ENSG00000226627 | 5.13E-15 | -2.63127 | 1 | 1 SHANK2-AS1    | -      |
| ENSG00000226629 | 5.13E-15 | -2.63127 | 1 | 1 LINC00974     | -      |
| ENSG00000226631 | 5.13E-15 | -2.63127 | 1 | 1 SLC9A3P3      | K12040 |
| ENSG00000226632 | 5.13E-15 | -2.63127 | 1 | 1 UBE2V1P1      | K10704 |
| ENSG00000226633 | 5.13E-15 | -2.63127 | 1 | 1 PPIAP28       | K03767 |
| ENSG00000226636 | 5.13E-15 | -2.63127 | 1 | 1 RP5-1049N15.2 | -      |
| ENSG00000226637 | 5.13E-15 | -2.63127 | 1 | 1 RP6-206I17.3  | -      |



|                 |          |          |   |                 |        |
|-----------------|----------|----------|---|-----------------|--------|
| ENSG00000226640 | 5.13E-15 | -2.63127 | 1 | 1 RP11-21J7.1   | -      |
| ENSG00000226641 | 5.13E-15 | -2.63127 | 1 | 1 RP13-13A3.1   | K10135 |
| ENSG00000226642 | 5.13E-15 | -2.63127 | 1 | 1 ACTG1P12      | K05692 |
| ENSG00000226643 | 5.13E-15 | -2.63127 | 1 | 1 RP11-358H9.1  | -      |
| ENSG00000226644 | 5.13E-15 | -2.63127 | 1 | 1 RP11-128M1.1  | -      |
| ENSG00000226646 | 5.13E-15 | -2.63127 | 1 | 1 RPL7P37       | K02937 |
| ENSG00000226648 | 5.13E-15 | -2.63127 | 1 | 1 RP1-1J6.2     | -      |
| ENSG00000226649 | 5.13E-15 | -2.63127 | 1 | 1 AC019118.4    | -      |
| ENSG00000226653 | 5.13E-15 | -2.63127 | 1 | 1 OR13Z1P       | K04257 |
| ENSG00000226655 | 5.13E-15 | -2.63127 | 1 | 1 AC096732.2    | -      |
| ENSG00000226658 | 5.13E-15 | -2.63127 | 1 | 1 AC005037.4    | K02893 |
| ENSG00000226659 | 5.13E-15 | -2.63127 | 1 | 1 RP11-137H2.4  | -      |
| ENSG00000226660 | 5.13E-15 | -2.63127 | 1 | 1 TRBV2         | -      |
| ENSG00000226661 | 5.13E-15 | -2.63127 | 1 | 1 RP5-1139I1.2  | -      |
| ENSG00000226662 | 5.13E-15 | -2.63127 | 1 | 1 CHMP1AP1      | K12197 |
| ENSG00000226663 | 5.13E-15 | -2.63127 | 1 | 1 MTND4P10      | -      |
| ENSG00000226664 | 5.13E-15 | -2.63127 | 1 | 1 RP4-745E8.2   | -      |
| ENSG00000226665 | 5.13E-15 | -2.63127 | 1 | 1 SSR1P2        | -      |
| ENSG00000226667 | 5.13E-15 | -2.63127 | 1 | 1 RP11-292F22.5 | -      |
| ENSG00000226668 | 5.13E-15 | -2.63127 | 1 | 1 RP11-526D8.7  | -      |
| ENSG00000226669 | 5.13E-15 | -2.63127 | 1 | 1 RP11-509J21.4 | -      |
| ENSG00000226670 | 5.13E-15 | -2.63127 | 1 | 1 BCAS2P3       | K12861 |
| ENSG00000226671 | 5.13E-15 | -2.63127 | 1 | 1 AC005008.3    | -      |
| ENSG00000226674 | 5.13E-15 | -2.63127 | 1 | 1 TEX41         | -      |
| ENSG00000226675 | 5.13E-15 | -2.63127 | 1 | 1 RP11-666A1.3  | -      |
| ENSG00000226676 | 5.13E-15 | -2.63127 | 1 | 1 RP11-589B3.6  | -      |
| ENSG00000226677 | 5.13E-15 | -2.63127 | 1 | 1 IGBP1P1       | K17606 |
| ENSG00000226679 | 5.13E-15 | -2.63127 | 1 | 1 RP13-43E11.1  | -      |
| ENSG00000226680 | 5.13E-15 | -2.63127 | 1 | 1 RP11-61D3.1   | -      |
| ENSG00000226681 | 5.13E-15 | -2.63127 | 1 | 1 AC020595.1    | -      |
| ENSG00000226683 | 5.13E-15 | -2.63127 | 1 | 1 PWWP2AP1      | -      |
| ENSG00000226684 | 5.13E-15 | -2.63127 | 1 | 1 RP3-418C23.2  | -      |
| ENSG00000226685 | 5.13E-15 | -2.63127 | 1 | 1 CT47A12       | -      |
| ENSG00000226693 | 5.13E-15 | -2.63127 | 1 | 1 RP11-412H9.1  | K17609 |
| ENSG00000226695 | 5.13E-15 | -2.63127 | 1 | 1 ANKRD20A10P   | -      |
| ENSG00000226696 | 5.13E-15 | -2.63127 | 1 | 1 LENG8-AS1     | -      |
| ENSG00000226698 | 5.13E-15 | -2.63127 | 1 | 1 RP1-50O24.6   | -      |
| ENSG00000226699 | 5.13E-15 | -2.63127 | 1 | 1 RP11-122K13.7 | -      |
| ENSG00000226700 | 5.13E-15 | -2.63127 | 1 | 1 MTND4P25      | -      |
| ENSG00000226702 | 5.13E-15 | -2.63127 | 1 | 1 AC011306.2    | -      |
| ENSG00000226703 | 5.13E-15 | -2.63127 | 1 | 1 NPM1P4        | K11276 |
| ENSG00000226707 | 5.13E-15 | -2.63127 | 1 | 1 RP11-719J20.1 | -      |
| ENSG00000226708 | 5.13E-15 | -2.63127 | 1 | 1 AC073409.1    | -      |
| ENSG00000226709 | 5.13E-15 | -2.63127 | 1 | 1 FGF12-AS3     | -      |
| ENSG00000226711 | 5.13E-15 | -2.63127 | 1 | 1 FAM66C        | -      |
| ENSG00000226715 | 5.13E-15 | -2.63127 | 1 | 1 RP11-411H5.1  | -      |
| ENSG00000226716 | 5.13E-15 | -2.63127 | 1 | 1 AL589986.2    | -      |
| ENSG00000226717 | 5.13E-15 | -2.63127 | 1 | 1 RP11-87N24.2  | -      |
| ENSG00000226718 | 5.13E-15 | -2.63127 | 1 | 1 SNRPGP8       | K11099 |
| ENSG00000226721 | 5.13E-15 | -2.63127 | 1 | 1 EEF1DP2       | K15410 |
| ENSG00000226722 | 5.13E-15 | -2.63127 | 1 | 1 LINC00424     | -      |
| ENSG00000226723 | 5.13E-15 | -2.63127 | 1 | 1 RP11-142L4.3  | K06174 |
| ENSG00000226724 | 5.13E-15 | -2.63127 | 1 | 1 RP11-795A2.3  | -      |
| ENSG00000226725 | 5.13E-15 | -2.63127 | 1 | 1 RP11-493K23.1 | -      |
| ENSG00000226726 | 5.13E-15 | -2.63127 | 1 | 1 TMEM256P2     | -      |
| ENSG00000226729 | 5.13E-15 | -2.63127 | 1 | 1 RPL35AP30     | K02917 |
| ENSG00000226733 | 5.13E-15 | -2.63127 | 1 | 1 RP11-397G17.1 | -      |
| ENSG00000226734 | 5.13E-15 | -2.63127 | 1 | 1 SNRPGP12      | -      |

|                 |          |          |   |                 |        |
|-----------------|----------|----------|---|-----------------|--------|
| ENSG00000226739 | 5.13E-15 | -2.63127 | 1 | 1 RP11-347L18.1 | -      |
| ENSG00000226740 | 5.13E-15 | -2.63127 | 1 | 1 RP11-31L23.3  | -      |
| ENSG00000226741 | 5.13E-15 | -2.63127 | 1 | 1 CTA-929C8.6   | -      |
| ENSG00000226744 | 5.13E-15 | -2.63127 | 1 | 1 AC079781.5    | K01953 |
| ENSG00000226745 | 5.13E-15 | -2.63127 | 1 | 1 RP11-115D7.3  | K16548 |
| ENSG00000226746 | 5.13E-15 | -2.63127 | 1 | 1 SMCR5         | -      |
| ENSG00000226747 | 5.13E-15 | -2.63127 | 1 | 1 AC007966.1    | -      |
| ENSG00000226750 | 5.13E-15 | -2.63127 | 1 | 1 RP11-513D4.3  | K10843 |
| ENSG00000226751 | 5.13E-15 | -2.63127 | 1 | 1 AF127936.5    | -      |
| ENSG00000226753 | 5.13E-15 | -2.63127 | 1 | 1 RP11-212D3.2  | -      |
| ENSG00000226755 | 5.13E-15 | -2.63127 | 1 | 1 VPS25P1       | K12189 |
| ENSG00000226757 | 5.13E-15 | -2.63127 | 1 | 1 AC079341.1    | -      |
| ENSG00000226758 | 5.13E-15 | -2.63127 | 1 | 1 DISC1-IT1     | -      |
| ENSG00000226759 | 5.13E-15 | -2.63127 | 1 | 1 DAB1-AS1      | -      |
| ENSG00000226761 | 5.13E-15 | -2.63127 | 1 | 1 TAS2R46       | K08474 |
| ENSG00000226762 | 5.13E-15 | -2.63127 | 1 | 1 RP11-298E9.6  | -      |
| ENSG00000226764 | 5.13E-15 | -2.63127 | 1 | 1 AC010145.4    | -      |
| ENSG00000226765 | 5.13E-15 | -2.63127 | 1 | 1 RP11-694D5.1  | K02998 |
| ENSG00000226766 | 5.13E-15 | -2.63127 | 1 | 1 FABP7P1       | K08756 |
| ENSG00000226767 | 5.13E-15 | -2.63127 | 1 | 1 RP11-328P23.3 | K14958 |
| ENSG00000226769 | 5.13E-15 | -2.63127 | 1 | 1 GAPDHP54      | -      |
| ENSG00000226770 | 5.13E-15 | -2.63127 | 1 | 1 AC000124.1    | -      |
| ENSG00000226772 | 5.13E-15 | -2.63127 | 1 | 1 CTA-747E2.10  | -      |
| ENSG00000226773 | 5.13E-15 | -2.63127 | 1 | 1 RP4-775D17.1  | K09228 |
| ENSG00000226774 | 5.13E-15 | -2.63127 | 1 | 1 RP11-654E17.2 | -      |
| ENSG00000226776 | 5.13E-15 | -2.63127 | 1 | 1 KRTAP3-4P     | -      |
| ENSG00000226777 | 5.13E-15 | -2.63127 | 1 | 1 KIAA0125      | -      |
| ENSG00000226779 | 5.13E-15 | -2.63127 | 1 | 1 NAALADL2-AS2  | -      |
| ENSG00000226780 | 5.13E-15 | -2.63127 | 1 | 1 RP11-38J22.3  | -      |
| ENSG00000226782 | 5.13E-15 | -2.63127 | 1 | 1 RP11-706D8.3  | -      |
| ENSG00000226783 | 5.13E-15 | -2.63127 | 1 | 1 TLK1P1        | K08864 |
| ENSG00000226785 | 5.13E-15 | -2.63127 | 1 | 1 AC073218.1    | -      |
| ENSG00000226786 | 5.13E-15 | -2.63127 | 1 | 1 RP1-167F1.2   | -      |
| ENSG00000226790 | 5.13E-15 | -2.63127 | 1 | 1 HNRNPA3P1     | K12741 |
| ENSG00000226791 | 5.13E-15 | -2.63127 | 1 | 1 AC109826.1    | -      |
| ENSG00000226792 | 5.13E-15 | -2.63127 | 1 | 1 LINC00371     | -      |
| ENSG00000226794 | 5.13E-15 | -2.63127 | 1 | 1 MTND1P20      | K03878 |
| ENSG00000226797 | 5.13E-15 | -2.63127 | 1 | 1 AC015923.1    | -      |
| ENSG00000226798 | 5.13E-15 | -2.63127 | 1 | 1 RP11-289F5.1  | -      |
| ENSG00000226801 | 5.13E-15 | -2.63127 | 1 | 1 OSTCP8        | -      |
| ENSG00000226802 | 5.13E-15 | -2.63127 | 1 | 1 RP11-72I18.1  | K11338 |
| ENSG00000226804 | 5.13E-15 | -2.63127 | 1 | 1 RP4-675G8.3   | K09228 |
| ENSG00000226806 | 5.13E-15 | -2.63127 | 1 | 1 AC011893.3    | -      |
| ENSG00000226807 | 5.13E-15 | -2.63127 | 1 | 1 MROH5         | -      |
| ENSG00000226810 | 5.13E-15 | -2.63127 | 1 | 1 RP11-45H22.1  | K09228 |
| ENSG00000226814 | 5.13E-15 | -2.63127 | 1 | 1 RP3-419C19.2  | -      |
| ENSG00000226816 | 5.13E-15 | -2.63127 | 1 | 1 AC005082.12   | -      |
| ENSG00000226818 | 5.13E-15 | -2.63127 | 1 | 1 SLC6A6P1      | K05039 |
| ENSG00000226819 | 5.13E-15 | -2.63127 | 1 | 1 MEIS1-AS3     | -      |
| ENSG00000226822 | 5.13E-15 | -2.63127 | 1 | 1 RP11-356N1.2  | -      |
| ENSG00000226825 | 5.13E-15 | -2.63127 | 1 | 1 RP11-363D24.1 | -      |
| ENSG00000226827 | 5.13E-15 | -2.63127 | 1 | 1 NPM1P11       | K11276 |
| ENSG00000226828 | 5.13E-15 | -2.63127 | 1 | 1 RP11-278H7.1  | -      |
| ENSG00000226829 | 5.13E-15 | -2.63127 | 1 | 1 RP5-945F2.3   | -      |
| ENSG00000226831 | 5.13E-15 | -2.63127 | 1 | 1 MED15P3       | -      |
| ENSG00000226835 | 5.13E-15 | -2.63127 | 1 | 1 RP11-148B18.3 | -      |
| ENSG00000226836 | 5.13E-15 | -2.63127 | 1 | 1 RP11-77B22.1  | K02912 |
| ENSG00000226837 | 5.13E-15 | -2.63127 | 1 | 1 HMGB1P32      | K10802 |

|                 |          |          |   |                  |        |
|-----------------|----------|----------|---|------------------|--------|
| ENSG00000226838 | 5.13E-15 | -2.63127 | 1 | 1 AC096582.8     | K16941 |
| ENSG00000226839 | 5.13E-15 | -2.63127 | 1 | 1 MTND6P11       | -      |
| ENSG00000226840 | 5.13E-15 | -2.63127 | 1 | 1 PAICSP3        | K01587 |
| ENSG00000226842 | 5.13E-15 | -2.63127 | 1 | 1 RP11-166N17.3  | -      |
| ENSG00000226843 | 5.13E-15 | -2.63127 | 1 | 1 RP11-2P2.1     | K13044 |
| ENSG00000226845 | 5.13E-15 | -2.63127 | 1 | 1 EEF1GP3        | K03233 |
| ENSG00000226846 | 5.13E-15 | -2.63127 | 1 | 1 LINC00348      | -      |
| ENSG00000226847 | 5.13E-15 | -2.63127 | 1 | 1 PRPS1P1        | -      |
| ENSG00000226852 | 5.13E-15 | -2.63127 | 1 | 1 RP1-212P9.2    | -      |
| ENSG00000226854 | 5.13E-15 | -2.63127 | 1 | 1 RP11-212D3.4   | -      |
| ENSG00000226855 | 5.13E-15 | -2.63127 | 1 | 1 RP11-350G8.3   | K02998 |
| ENSG00000226857 | 5.13E-15 | -2.63127 | 1 | 1 DUTP3          | K01520 |
| ENSG00000226860 | 5.13E-15 | -2.63127 | 1 | 1 AC109638.1     | -      |
| ENSG00000226861 | 5.13E-15 | -2.63127 | 1 | 1 RP5-1119O21.2  | -      |
| ENSG00000226862 | 5.13E-15 | -2.63127 | 1 | 1 RP11-569A11.1  | -      |
| ENSG00000226863 | 5.13E-15 | -2.63127 | 1 | 1 SHROOM2P1      | K18625 |
| ENSG00000226867 | 5.13E-15 | -2.63127 | 1 | 1 RP13-77O11.8   | K15624 |
| ENSG00000226868 | 5.13E-15 | -2.63127 | 1 | 1 RP11-122M14.3  | -      |
| ENSG00000226870 | 5.13E-15 | -2.63127 | 1 | 1 BX276092.2     | -      |
| ENSG00000226871 | 5.13E-15 | -2.63127 | 1 | 1 AC135178.7     | -      |
| ENSG00000226873 | 5.13E-15 | -2.63127 | 1 | 1 CDY14P         | -      |
| ENSG00000226875 | 5.13E-15 | -2.63127 | 1 | 1 ZNF877P        | -      |
| ENSG00000226876 | 5.13E-15 | -2.63127 | 1 | 1 RP11-36N20.1   | -      |
| ENSG00000226880 | 5.13E-15 | -2.63127 | 1 | 1 XX-2136C48.7   | -      |
| ENSG00000226881 | 5.13E-15 | -2.63127 | 1 | 1 H3F3AP5        | K11253 |
| ENSG00000226883 | 5.13E-15 | -2.63127 | 1 | 1 RP4-782L23.2   | -      |
| ENSG00000226884 | 5.13E-15 | -2.63127 | 1 | 1 AC016727.3     | K02980 |
| ENSG00000226885 | 5.13E-15 | -2.63127 | 1 | 1 KB-1183D5.9    | K09390 |
| ENSG00000226886 | 5.13E-15 | -2.63127 | 1 | 1 AC093787.1     | K14958 |
| ENSG00000226888 | 5.13E-15 | -2.63127 | 1 | 1 RP11-561G1.3   | -      |
| ENSG00000226890 | 5.13E-15 | -2.63127 | 1 | 1 LA16c-395F10.1 | -      |
| ENSG00000226894 | 5.13E-15 | -2.63127 | 1 | 1 Tmprss11bnl    | K09751 |
| ENSG00000226897 | 5.13E-15 | -2.63127 | 1 | 1 RP11-435B5.6   | -      |
| ENSG00000226899 | 5.13E-15 | -2.63127 | 1 | 1 RP11-298J20.3  | -      |
| ENSG00000226900 | 5.13E-15 | -2.63127 | 1 | 1 RP11-432J24.5  | -      |
| ENSG00000226902 | 5.13E-15 | -2.63127 | 1 | 1 CHCHD2P1       | -      |
| ENSG00000226903 | 5.13E-15 | -2.63127 | 1 | 1 LINC00354      | -      |
| ENSG00000226904 | 5.13E-15 | -2.63127 | 1 | 1 RP11-561O23.8  | -      |
| ENSG00000226905 | 5.13E-15 | -2.63127 | 1 | 1 AC005040.3     | K12019 |
| ENSG00000226906 | 5.13E-15 | -2.63127 | 1 | 1 TTTY4          | -      |
| ENSG00000226907 | 5.13E-15 | -2.63127 | 1 | 1 CT45A6         | -      |
| ENSG00000226908 | 5.13E-15 | -2.63127 | 1 | 1 HIST1H2BPS3    | K11252 |
| ENSG00000226912 | 5.13E-15 | -2.63127 | 1 | 1 ISCA2P1        | -      |
| ENSG00000226915 | 5.13E-15 | -2.63127 | 1 | 1 AC068137.13    | K02885 |
| ENSG00000226918 | 5.13E-15 | -2.63127 | 1 | 1 AC010086.1     | K12885 |
| ENSG00000226921 | 5.13E-15 | -2.63127 | 1 | 1 LINC00454      | -      |
| ENSG00000226925 | 5.13E-15 | -2.63127 | 1 | 1 AC007271.3     | -      |
| ENSG00000226927 | 5.13E-15 | -2.63127 | 1 | 1 RP11-302I18.3  | -      |
| ENSG00000226928 | 5.13E-15 | -2.63127 | 1 | 1 RPS14P4        | K02955 |
| ENSG00000226929 | 5.13E-15 | -2.63127 | 1 | 1 CT47A11        | -      |
| ENSG00000226930 | 5.13E-15 | -2.63127 | 1 | 1 GTF2IP2        | K03121 |
| ENSG00000226933 | 5.13E-15 | -2.63127 | 1 | 1 NRBF2P2        | -      |
| ENSG00000226935 | 5.13E-15 | -2.63127 | 1 | 1 LINC00161      | -      |
| ENSG00000226937 | 5.13E-15 | -2.63127 | 1 | 1 CEP164P1       | K04264 |
| ENSG00000226938 | 5.13E-15 | -2.63127 | 1 | 1 RP11-117D22.1  | -      |
| ENSG00000226939 | 5.13E-15 | -2.63127 | 1 | 1 AC062021.1     | -      |
| ENSG00000226941 | 5.13E-15 | -2.63127 | 1 | 1 RBMY1J         | K12885 |
| ENSG00000226942 | 5.13E-15 | -2.63127 | 1 | 1 IL9RP3         | K05073 |

|                 |          |          |   |                 |        |
|-----------------|----------|----------|---|-----------------|--------|
| ENSG00000226943 | 5.13E-15 | -2.63127 | 1 | 1 ALG1L5P       | K03842 |
| ENSG00000226945 | 5.13E-15 | -2.63127 | 1 | 1 RP11-564A8.4  | K02872 |
| ENSG00000226946 | 5.13E-15 | -2.63127 | 1 | 1 AC062022.1    | -      |
| ENSG00000226947 | 5.13E-15 | -2.63127 | 1 | 1 RP1-52J10.9   | K05498 |
| ENSG00000226949 | 5.13E-15 | -2.63127 | 1 | 1 OR6K5P        | K04257 |
| ENSG00000226952 | 5.13E-15 | -2.63127 | 1 | 1 RP4-714D9.4   | -      |
| ENSG00000226953 | 5.13E-15 | -2.63127 | 1 | 1 AC010890.1    | -      |
| ENSG00000226954 | 5.13E-15 | -2.63127 | 1 | 1 RP5-983L19.2  | -      |
| ENSG00000226955 | 5.13E-15 | -2.63127 | 1 | 1 AC104306.4    | K03506 |
| ENSG00000226956 | 5.13E-15 | -2.63127 | 1 | 1 AP000432.2    | -      |
| ENSG00000226960 | 5.13E-15 | -2.63127 | 1 | 1 RP5-837O21.1  | -      |
| ENSG00000226961 | 5.13E-15 | -2.63127 | 1 | 1 AC018463.5    | K03767 |
| ENSG00000226962 | 5.13E-15 | -2.63127 | 1 | 1 RAC1P6        | -      |
| ENSG00000226967 | 5.13E-15 | -2.63127 | 1 | 1 HAUS4P1       | K16587 |
| ENSG00000226968 | 5.13E-15 | -2.63127 | 1 | 1 LINC00423     | -      |
| ENSG00000226969 | 5.13E-15 | -2.63127 | 1 | 1 RP11-547D24.3 | -      |
| ENSG00000226970 | 5.13E-15 | -2.63127 | 1 | 1 RP11-82H13.2  | K12158 |
| ENSG00000226971 | 5.13E-15 | -2.63127 | 1 | 1 AF196972.4    | K00819 |
| ENSG00000226972 | 5.13E-15 | -2.63127 | 1 | 1 AC013717.3    | K02870 |
| ENSG00000226974 | 5.13E-15 | -2.63127 | 1 | 1 AL445989.1    | -      |
| ENSG00000226975 | 5.13E-15 | -2.63127 | 1 | 1 AC006987.6    | -      |
| ENSG00000226977 | 5.13E-15 | -2.63127 | 1 | 1 HMG1P24       | K11299 |
| ENSG00000226978 | 5.13E-15 | -2.63127 | 1 | 1 MAGI2-AS2     | -      |
| ENSG00000226979 | 5.13E-15 | -2.63127 | 1 | 1 LTA           | K05468 |
| ENSG00000226982 | 5.13E-15 | -2.63127 | 1 | 1 CENPCP1       | K11497 |
| ENSG00000226983 | 5.13E-15 | -2.63127 | 1 | 1 AP000235.2    | -      |
| ENSG00000226984 | 5.13E-15 | -2.63127 | 1 | 1 RP4-591B8.2   | K02898 |
| ENSG00000226985 | 5.13E-15 | -2.63127 | 1 | 1 RP11-142G7.2  | -      |
| ENSG00000226989 | 5.13E-15 | -2.63127 | 1 | 1 AL049758.2    | K18173 |
| ENSG00000226990 | 5.13E-15 | -2.63127 | 1 | 1 RP11-543F8.2  | -      |
| ENSG00000226992 | 5.13E-15 | -2.63127 | 1 | 1 AC144525.1    | -      |
| ENSG00000226994 | 5.13E-15 | -2.63127 | 1 | 1 AC012593.1    | -      |
| ENSG00000226995 | 5.13E-15 | -2.63127 | 1 | 1 LINC00658     | -      |
| ENSG00000226996 | 5.13E-15 | -2.63127 | 1 | 1 AP000477.3    | -      |
| ENSG00000226998 | 5.13E-15 | -2.63127 | 1 | 1 RP11-291J9.1  | -      |
| ENSG00000226999 | 5.13E-15 | -2.63127 | 1 | 1 AC073325.2    | K08770 |
| ENSG00000227000 | 5.13E-15 | -2.63127 | 1 | 1 HSPD1P14      | -      |
| ENSG00000227001 | 5.13E-15 | -2.63127 | 1 | 1 NBPF2P        | -      |
| ENSG00000227002 | 5.13E-15 | -2.63127 | 1 | 1 SNRPEP10      | K11097 |
| ENSG00000227004 | 5.13E-15 | -2.63127 | 1 | 1 AC108032.1    | -      |
| ENSG00000227005 | 5.13E-15 | -2.63127 | 1 | 1 AC011718.3    | -      |
| ENSG00000227007 | 5.13E-15 | -2.63127 | 1 | 1 AC105253.1    | -      |
| ENSG00000227009 | 5.13E-15 | -2.63127 | 1 | 1 FUNDC2P4      | -      |
| ENSG00000227011 | 5.13E-15 | -2.63127 | 1 | 1 C17orf112     | -      |
| ENSG00000227012 | 5.13E-15 | -2.63127 | 1 | 1 RP1-97J1.2    | -      |
| ENSG00000227013 | 5.13E-15 | -2.63127 | 1 | 1 OR7E96P       | K04257 |
| ENSG00000227014 | 5.13E-15 | -2.63127 | 1 | 1 AC007285.6    | -      |
| ENSG00000227015 | 5.13E-15 | -2.63127 | 1 | 1 RP11-548K12.6 | -      |
| ENSG00000227016 | 5.13E-15 | -2.63127 | 1 | 1 RP11-262K1.1  | -      |
| ENSG00000227017 | 5.13E-15 | -2.63127 | 1 | 1 AC007036.6    | -      |
| ENSG00000227018 | 5.13E-15 | -2.63127 | 1 | 1 IL6STP1       | K05060 |
| ENSG00000227019 | 5.13E-15 | -2.63127 | 1 | 1 OR7E101P      | K04257 |
| ENSG00000227021 | 5.13E-15 | -2.63127 | 1 | 1 AC007557.3    | -      |
| ENSG00000227023 | 5.13E-15 | -2.63127 | 1 | 1 OR51A3P       | K04257 |
| ENSG00000227028 | 5.13E-15 | -2.63127 | 1 | 1 SLC8A1-AS1    | -      |
| ENSG00000227029 | 5.13E-15 | -2.63127 | 1 | 1 RP11-168P8.3  | -      |
| ENSG00000227032 | 5.13E-15 | -2.63127 | 1 | 1 RP11-34E5.4   | K02981 |
| ENSG00000227033 | 5.13E-15 | -2.63127 | 1 | 1 AC105461.1    | -      |

|                 |          |          |   |                 |        |
|-----------------|----------|----------|---|-----------------|--------|
| ENSG00000227034 | 5.13E-15 | -2.63127 | 1 | 1 RP11-234N17.1 | K02932 |
| ENSG00000227035 | 5.13E-15 | -2.63127 | 1 | 1 RP11-3N2.8    | K02126 |
| ENSG00000227040 | 5.13E-15 | -2.63127 | 1 | 1 RP11-533F5.2  | -      |
| ENSG00000227042 | 5.13E-15 | -2.63127 | 1 | 1 RP6-1O2.1     | -      |
| ENSG00000227043 | 5.13E-15 | -2.63127 | 1 | 1 RP11-286M16.1 | -      |
| ENSG00000227047 | 5.13E-15 | -2.63127 | 1 | 1 AC012065.4    | -      |
| ENSG00000227048 | 5.13E-15 | -2.63127 | 1 | 1 RP11-134G8.2  | K09579 |
| ENSG00000227050 | 5.13E-15 | -2.63127 | 1 | 1 RP11-460I13.2 | -      |
| ENSG00000227051 | 5.13E-15 | -2.63127 | 1 | 1 C14orf132     | K02927 |
| ENSG00000227053 | 5.13E-15 | -2.63127 | 1 | 1 RP11-395B7.4  | -      |
| ENSG00000227054 | 5.13E-15 | -2.63127 | 1 | 1 FDX1P2        | -      |
| ENSG00000227055 | 5.13E-15 | -2.63127 | 1 | 1 AC009961.5    | K16762 |
| ENSG00000227056 | 5.13E-15 | -2.63127 | 1 | 1 RPL6P2        | K02934 |
| ENSG00000227058 | 5.13E-15 | -2.63127 | 1 | 1 RP13-34L8.7   | -      |
| ENSG00000227059 | 5.13E-15 | -2.63127 | 1 | 1 ANHX          | -      |
| ENSG00000227061 | 5.13E-15 | -2.63127 | 1 | 1 AC079779.7    | -      |
| ENSG00000227062 | 5.13E-15 | -2.63127 | 1 | 1 RP11-115A15.4 | K10704 |
| ENSG00000227064 | 5.13E-15 | -2.63127 | 1 | 1 RP3-363L9.1   | -      |
| ENSG00000227066 | 5.13E-15 | -2.63127 | 1 | 1 RP3-340N1.2   | -      |
| ENSG00000227067 | 5.13E-15 | -2.63127 | 1 | 1 DPPA3P1       | -      |
| ENSG00000227068 | 5.13E-15 | -2.63127 | 1 | 1 RP11-12A16.3  | -      |
| ENSG00000227069 | 5.13E-15 | -2.63127 | 1 | 1 CNN2P2        | -      |
| ENSG00000227072 | 5.13E-15 | -2.63127 | 1 | 1 RP3-466I7.1   | -      |
| ENSG00000227075 | 5.13E-15 | -2.63127 | 1 | 1 AP000472.3    | -      |
| ENSG00000227077 | 5.13E-15 | -2.63127 | 1 | 1 AC107983.4    | K02979 |
| ENSG00000227078 | 5.13E-15 | -2.63127 | 1 | 1 AC004448.2    | -      |
| ENSG00000227080 | 5.13E-15 | -2.63127 | 1 | 1 CTD-2021A8.3  | -      |
| ENSG00000227083 | 5.13E-15 | -2.63127 | 1 | 1 L29074.3      | -      |
| ENSG00000227084 | 5.13E-15 | -2.63127 | 1 | 1 RP11-144A16.5 | -      |
| ENSG00000227087 | 5.13E-15 | -2.63127 | 1 | 1 RBMX2P5       | K13107 |
| ENSG00000227088 | 5.13E-15 | -2.63127 | 1 | 1 AC084149.2    | -      |
| ENSG00000227089 | 5.13E-15 | -2.63127 | 1 | 1 RP1-135L22.1  | -      |
| ENSG00000227090 | 5.13E-15 | -2.63127 | 1 | 1 AP000402.3    | -      |
| ENSG00000227091 | 5.13E-15 | -2.63127 | 1 | 1 RP5-1028L10.1 | -      |
| ENSG00000227094 | 5.13E-15 | -2.63127 | 1 | 1 RP11-565P22.2 | -      |
| ENSG00000227096 | 5.13E-15 | -2.63127 | 1 | 1 HMGB3P8       | K11296 |
| ENSG00000227098 | 5.13E-15 | -2.63127 | 1 | 1 AC073636.1    | -      |
| ENSG00000227101 | 5.13E-15 | -2.63127 | 1 | 1 RP11-433J20.2 | -      |
| ENSG00000227102 | 5.13E-15 | -2.63127 | 1 | 1 OR2AS1P       | -      |
| ENSG00000227104 | 5.13E-15 | -2.63127 | 1 | 1 PIGQP1        | K03860 |
| ENSG00000227105 | 5.13E-15 | -2.63127 | 1 | 1 PARP1P1       | K10798 |
| ENSG00000227107 | 5.13E-15 | -2.63127 | 1 | 1 AC096574.5    | -      |
| ENSG00000227108 | 5.13E-15 | -2.63127 | 1 | 1 IGHD1-14      | -      |
| ENSG00000227109 | 5.13E-15 | -2.63127 | 1 | 1 CRIP1P3       | -      |
| ENSG00000227110 | 5.13E-15 | -2.63127 | 1 | 1 LMCD1-AS1     | -      |
| ENSG00000227112 | 5.13E-15 | -2.63127 | 1 | 1 RP1-86D1.4    | -      |
| ENSG00000227114 | 5.13E-15 | -2.63127 | 1 | 1 AC018696.3    | K17608 |
| ENSG00000227115 | 5.13E-15 | -2.63127 | 1 | 1 RP11-267C16.1 | -      |
| ENSG00000227117 | 5.13E-15 | -2.63127 | 1 | 1 CTA-85E5.10   | -      |
| ENSG00000227118 | 5.13E-15 | -2.63127 | 1 | 1 BTF3P13       | K01527 |
| ENSG00000227120 | 5.13E-15 | -2.63127 | 1 | 1 AC009238.7    | -      |
| ENSG00000227121 | 5.13E-15 | -2.63127 | 1 | 1 RP11-319F12.2 | -      |
| ENSG00000227123 | 5.13E-15 | -2.63127 | 1 | 1 RPL12P44      | K02870 |
| ENSG00000227125 | 5.13E-15 | -2.63127 | 1 | 1 AP002856.6    | -      |
| ENSG00000227128 | 5.13E-15 | -2.63127 | 1 | 1 LBX1-AS1      | -      |
| ENSG00000227131 | 5.13E-15 | -2.63127 | 1 | 1 RP11-552E20.1 | -      |
| ENSG00000227133 | 5.13E-15 | -2.63127 | 1 | 1 AC011742.5    | -      |
| ENSG00000227134 | 5.13E-15 | -2.63127 | 1 | 1 AC093084.1    | -      |

|                 |          |          |   |                    |        |
|-----------------|----------|----------|---|--------------------|--------|
| ENSG00000227135 | 5.13E-15 | -2.63127 | 1 | 1 GCSAML-AS1       | -      |
| ENSG00000227136 | 5.13E-15 | -2.63127 | 1 | 1 LINC00595        | -      |
| ENSG00000227138 | 5.13E-15 | -2.63127 | 1 | 1 RP11-421B23.2    | K02984 |
| ENSG00000227139 | 5.13E-15 | -2.63127 | 1 | 1 RP11-533N14.3    | -      |
| ENSG00000227140 | 5.13E-15 | -2.63127 | 1 | 1 USP17L5          | K11845 |
| ENSG00000227143 | 5.13E-15 | -2.63127 | 1 | 1 LINC01153        | -      |
| ENSG00000227148 | 5.13E-15 | -2.63127 | 1 | 1 RP11-196D18.1    | -      |
| ENSG00000227149 | 5.13E-15 | -2.63127 | 1 | 1 AC092156.3       | -      |
| ENSG00000227151 | 5.13E-15 | -2.63127 | 1 | 1 PRR20D           | -      |
| ENSG00000227152 | 5.13E-15 | -2.63127 | 1 | 1 OR2T7            | K04257 |
| ENSG00000227154 | 5.13E-15 | -2.63127 | 1 | 1 MKRNP2           | K10892 |
| ENSG00000227157 | 5.13E-15 | -2.63127 | 1 | 1 AC068535.2       | -      |
| ENSG00000227159 | 5.13E-15 | -2.63127 | 1 | 1 DDX11L16         | K11273 |
| ENSG00000227160 | 5.13E-15 | -2.63127 | 1 | 1 RP1-65P5.1       | -      |
| ENSG00000227161 | 5.13E-15 | -2.63127 | 1 | 1 AC092755.4       | -      |
| ENSG00000227164 | 5.13E-15 | -2.63127 | 1 | 1 AL354993.1       | -      |
| ENSG00000227165 | 5.13E-15 | -2.63127 | 1 | 1 WDR11-AS1        | -      |
| ENSG00000227166 | 5.13E-15 | -2.63127 | 1 | 1 STSP1            | K01131 |
| ENSG00000227167 | 5.13E-15 | -2.63127 | 1 | 1 RP11-570H19.2    | -      |
| ENSG00000227169 | 5.13E-15 | -2.63127 | 1 | 1 RP1-37J18.1      | -      |
| ENSG00000227170 | 5.13E-15 | -2.63127 | 1 | 1 AF178030.2       | -      |
| ENSG00000227173 | 5.13E-15 | -2.63127 | 1 | 1 MYL6P3           | K12751 |
| ENSG00000227175 | 5.13E-15 | -2.63127 | 1 | 1 RP11-214D15.2    | -      |
| ENSG00000227176 | 5.13E-15 | -2.63127 | 1 | 1 AC092641.2       | K14842 |
| ENSG00000227177 | 5.13E-15 | -2.63127 | 1 | 1 AIMP1P2          | K15437 |
| ENSG00000227179 | 5.13E-15 | -2.63127 | 1 | 1 PGCP1            | K01377 |
| ENSG00000227180 | 5.13E-15 | -2.63127 | 1 | 1 AC013467.1       | -      |
| ENSG00000227181 | 5.13E-15 | -2.63127 | 1 | 1 RP11-317P15.3    | -      |
| ENSG00000227182 | 5.13E-15 | -2.63127 | 1 | 1 VN1R28P          | K04614 |
| ENSG00000227183 | 5.13E-15 | -2.63127 | 1 | 1 HDGFP1           | K16641 |
| ENSG00000227185 | 5.13E-15 | -2.63127 | 1 | 1 RP11-544D21.1    | -      |
| ENSG00000227186 | 5.13E-15 | -2.63127 | 1 | 1 RP11-77G23.5     | -      |
| ENSG00000227187 | 5.13E-15 | -2.63127 | 1 | 1 RP11-6C10.1      | K02889 |
| ENSG00000227188 | 5.13E-15 | -2.63127 | 1 | 1 RP5-1104E15.6    | -      |
| ENSG00000227189 | 5.13E-15 | -2.63127 | 1 | 1 AC092535.3       | -      |
| ENSG00000227192 | 5.13E-15 | -2.63127 | 1 | 1 RP1-45I4.3       | -      |
| ENSG00000227193 | 5.13E-15 | -2.63127 | 1 | 1 RP11-439A17.4    | -      |
| ENSG00000227194 | 5.13E-15 | -2.63127 | 1 | 1 GLUD1P7          | K00261 |
| ENSG00000227195 | 5.13E-15 | -2.63127 | 1 | 1 MIR663A          | -      |
| ENSG00000227196 | 5.13E-15 | -2.63127 | 1 | 1 IGHD4-23         | -      |
| ENSG00000227198 | 5.13E-15 | -2.63127 | 1 | 1 C6orf47-AS1      | -      |
| ENSG00000227204 | 5.13E-15 | -2.63127 | 1 | 1 RBMY2JP          | K12885 |
| ENSG00000227205 | 5.13E-15 | -2.63127 | 1 | 1 PFN1P9           | K05759 |
| ENSG00000227206 | 5.13E-15 | -2.63127 | 1 | 1 XXbac-BCX196D17  | -      |
| ENSG00000227207 | 5.13E-15 | -2.63127 | 1 | 1 RPL31P12         | K02910 |
| ENSG00000227208 | 5.13E-15 | -2.63127 | 1 | 1 LINC00552        | -      |
| ENSG00000227209 | 5.13E-15 | -2.63127 | 1 | 1 WARS2P1          | -      |
| ENSG00000227211 | 5.13E-15 | -2.63127 | 1 | 1 RP5-1100E15.4    | K11253 |
| ENSG00000227212 | 5.13E-15 | -2.63127 | 1 | 1 PFN1P7           | K05759 |
| ENSG00000227213 | 5.13E-15 | -2.63127 | 1 | 1 SPATA13-AS1      | -      |
| ENSG00000227214 | 5.13E-15 | -2.63127 | 1 | 1 HCG15            | -      |
| ENSG00000227215 | 5.13E-15 | -2.63127 | 1 | 1 RP11-445L13__B.3 | -      |
| ENSG00000227216 | 5.13E-15 | -2.63127 | 1 | 1 PFN1P5           | K05759 |
| ENSG00000227217 | 5.13E-15 | -2.63127 | 1 | 1 RP11-367J7.3     | -      |
| ENSG00000227224 | 5.13E-15 | -2.63127 | 1 | 1 RP11-72H11.1     | K02975 |
| ENSG00000227225 | 5.13E-15 | -2.63127 | 1 | 1 MTND1P14         | K03878 |
| ENSG00000227227 | 5.13E-15 | -2.63127 | 1 | 1 AC017101.10      | -      |
| ENSG00000227233 | 5.13E-15 | -2.63127 | 1 | 1 CICIP17          | K16941 |

|                 |          |          |   |                 |        |
|-----------------|----------|----------|---|-----------------|--------|
| ENSG00000227236 | 5.13E-15 | -2.63127 | 1 | 1 RP11-365D9.1  | K14720 |
| ENSG00000227238 | 5.13E-15 | -2.63127 | 1 | 1 TTC39DP       | -      |
| ENSG00000227239 | 5.13E-15 | -2.63127 | 1 | 1 AL121985.1    | -      |
| ENSG00000227240 | 5.13E-15 | -2.63127 | 1 | 1 RP11-563D10.1 | -      |
| ENSG00000227241 | 5.13E-15 | -2.63127 | 1 | 1 AC011998.4    | K11187 |
| ENSG00000227242 | 5.13E-15 | -2.63127 | 1 | 1 NBPF13P       | K16549 |
| ENSG00000227243 | 5.13E-15 | -2.63127 | 1 | 1 SLAMF6P1      | K16852 |
| ENSG00000227244 | 5.13E-15 | -2.63127 | 1 | 1 LINC00845     | -      |
| ENSG00000227245 | 5.13E-15 | -2.63127 | 1 | 1 RP11-136C24.2 | -      |
| ENSG00000227247 | 5.13E-15 | -2.63127 | 1 | 1 TRIM60P13     | -      |
| ENSG00000227248 | 5.13E-15 | -2.63127 | 1 | 1 FAM155A-IT1   | -      |
| ENSG00000227249 | 5.13E-15 | -2.63127 | 1 | 1 AC000374.1    | -      |
| ENSG00000227251 | 5.13E-15 | -2.63127 | 1 | 1 TRIM60P9Y     | K12029 |
| ENSG00000227254 | 5.13E-15 | -2.63127 | 1 | 1 VDAC1P12      | K05862 |
| ENSG00000227255 | 5.13E-15 | -2.63127 | 1 | 1 CDRT15P2      | -      |
| ENSG00000227257 | 5.13E-15 | -2.63127 | 1 | 1 RP11-330M2.3  | K18751 |
| ENSG00000227259 | 5.13E-15 | -2.63127 | 1 | 1 HMGN2P22      | K11300 |
| ENSG00000227260 | 5.13E-15 | -2.63127 | 1 | 1 AC116035.1    | -      |
| ENSG00000227261 | 5.13E-15 | -2.63127 | 1 | 1 YWHAZP7       | K16197 |
| ENSG00000227262 | 5.13E-15 | -2.63127 | 1 | 1 HCG4B         | K06751 |
| ENSG00000227264 | 5.13E-15 | -2.63127 | 1 | 1 ACTR3BP5      | K18584 |
| ENSG00000227265 | 5.13E-15 | -2.63127 | 1 | 1 AC073464.4    | K13676 |
| ENSG00000227267 | 5.13E-15 | -2.63127 | 1 | 1 RP11-305O4.2  | -      |
| ENSG00000227269 | 5.13E-15 | -2.63127 | 1 | 1 RP11-96L7.2   | -      |
| ENSG00000227270 | 5.13E-15 | -2.63127 | 1 | 1 AC009963.4    | K03348 |
| ENSG00000227271 | 5.13E-15 | -2.63127 | 1 | 1 RPL39P25      | K02924 |
| ENSG00000227274 | 5.13E-15 | -2.63127 | 1 | 1 AC005358.3    | -      |
| ENSG00000227275 | 5.13E-15 | -2.63127 | 1 | 1 MTND6P10      | -      |
| ENSG00000227278 | 5.13E-15 | -2.63127 | 1 | 1 RP11-656D10.5 | -      |
| ENSG00000227279 | 5.13E-15 | -2.63127 | 1 | 1 AC015933.2    | -      |
| ENSG00000227282 | 5.13E-15 | -2.63127 | 1 | 1 RP11-164D18.2 | -      |
| ENSG00000227283 | 5.13E-15 | -2.63127 | 1 | 1 RPL35AP12     | -      |
| ENSG00000227284 | 5.13E-15 | -2.63127 | 1 | 1 MARK2P10      | -      |
| ENSG00000227289 | 5.13E-15 | -2.63127 | 1 | 1 HSFY3P        | -      |
| ENSG00000227291 | 5.13E-15 | -2.63127 | 1 | 1 AC092170.1    | -      |
| ENSG00000227293 | 5.13E-15 | -2.63127 | 1 | 1 AC118345.1    | -      |
| ENSG00000227294 | 5.13E-15 | -2.63127 | 1 | 1 AC016994.2    | -      |
| ENSG00000227297 | 5.13E-15 | -2.63127 | 1 | 1 RP4-718J7.4   | -      |
| ENSG00000227298 | 5.13E-15 | -2.63127 | 1 | 1 RP5-905H7.5   | K08845 |
| ENSG00000227300 | 5.13E-15 | -2.63127 | 1 | 1 KRT16P2       | K07604 |
| ENSG00000227301 | 5.13E-15 | -2.63127 | 1 | 1 RP11-384P7.5  | -      |
| ENSG00000227302 | 5.13E-15 | -2.63127 | 1 | 1 SSXP9         | K15624 |
| ENSG00000227303 | 5.13E-15 | -2.63127 | 1 | 1 GS1-256O22.5  | -      |
| ENSG00000227304 | 5.13E-15 | -2.63127 | 1 | 1 RP11-791G16.2 | K02991 |
| ENSG00000227305 | 5.13E-15 | -2.63127 | 1 | 1 RP11-340I6.3  | -      |
| ENSG00000227306 | 5.13E-15 | -2.63127 | 1 | 1 AP006285.6    | -      |
| ENSG00000227308 | 5.13E-15 | -2.63127 | 1 | 1 AC009502.4    | -      |
| ENSG00000227309 | 5.13E-15 | -2.63127 | 1 | 1 AC140076.1    | K02910 |
| ENSG00000227310 | 5.13E-15 | -2.63127 | 1 | 1 RP11-144G6.10 | -      |
| ENSG00000227311 | 5.13E-15 | -2.63127 | 1 | 1 RP1-228H13.1  | K02889 |
| ENSG00000227312 | 5.13E-15 | -2.63127 | 1 | 1 RP11-496D1.2  | -      |
| ENSG00000227313 | 5.13E-15 | -2.63127 | 1 | 1 RP11-309N24.1 | -      |
| ENSG00000227318 | 5.13E-15 | -2.63127 | 1 | 1 RP11-282E4.1  | K09228 |
| ENSG00000227319 | 5.13E-15 | -2.63127 | 1 | 1 RBM22P6       | K12872 |
| ENSG00000227325 | 5.13E-15 | -2.63127 | 1 | 1 AC021106.1    | K06635 |
| ENSG00000227329 | 5.13E-15 | -2.63127 | 1 | 1 RP11-258C19.4 | K11419 |
| ENSG00000227330 | 5.13E-15 | -2.63127 | 1 | 1 AP000998.2    | -      |
| ENSG00000227331 | 5.13E-15 | -2.63127 | 1 | 1 AC005042.2    | K02936 |

|                 |          |          |   |                 |        |
|-----------------|----------|----------|---|-----------------|--------|
| ENSG00000227332 | 5.13E-15 | -2.63127 | 1 | 1 RP11-38M15.11 | -      |
| ENSG00000227335 | 5.13E-15 | -2.63127 | 1 | 1 IGHJ1P        | -      |
| ENSG00000227336 | 5.13E-15 | -2.63127 | 1 | 1 LINC00434     | -      |
| ENSG00000227337 | 5.13E-15 | -2.63127 | 1 | 1 AC139452.2    | K02893 |
| ENSG00000227338 | 5.13E-15 | -2.63127 | 1 | 1 RP11-195B3.1  | -      |
| ENSG00000227339 | 5.13E-15 | -2.63127 | 1 | 1 THRAP3P1      | K13112 |
| ENSG00000227342 | 5.13E-15 | -2.63127 | 1 | 1 LINC00307     | -      |
| ENSG00000227343 | 5.13E-15 | -2.63127 | 1 | 1 RPL15P1       | K02877 |
| ENSG00000227348 | 5.13E-15 | -2.63127 | 1 | 1 MTND5P25      | K03883 |
| ENSG00000227349 | 5.13E-15 | -2.63127 | 1 | 1 CEACAMP7      | K06500 |
| ENSG00000227350 | 5.13E-15 | -2.63127 | 1 | 1 RP11-438P9.2  | K03767 |
| ENSG00000227351 | 5.13E-15 | -2.63127 | 1 | 1 NANOGP6       | -      |
| ENSG00000227352 | 5.13E-15 | -2.63127 | 1 | 1 ARHGEF7-AS1   | -      |
| ENSG00000227353 | 5.13E-15 | -2.63127 | 1 | 1 RP11-475I24.6 | K07915 |
| ENSG00000227355 | 5.13E-15 | -2.63127 | 1 | 1 RP11-162D16.2 | -      |
| ENSG00000227356 | 5.13E-15 | -2.63127 | 1 | 1 LINC00866     | -      |
| ENSG00000227358 | 5.13E-15 | -2.63127 | 1 | 1 RP11-180I4.1  | -      |
| ENSG00000227360 | 5.13E-15 | -2.63127 | 1 | 1 RP11-518I13.1 | -      |
| ENSG00000227361 | 5.13E-15 | -2.63127 | 1 | 1 RPS24P7       | K02974 |
| ENSG00000227363 | 5.13E-15 | -2.63127 | 1 | 1 AC019172.2    | -      |
| ENSG00000227364 | 5.13E-15 | -2.63127 | 1 | 1 AC018685.2    | -      |
| ENSG00000227365 | 5.13E-15 | -2.63127 | 1 | 1 AC008060.5    | -      |
| ENSG00000227367 | 5.13E-15 | -2.63127 | 1 | 1 SLC9B1P4      | -      |
| ENSG00000227370 | 5.13E-15 | -2.63127 | 1 | 1 RP4-669P10.19 | -      |
| ENSG00000227371 | 5.13E-15 | -2.63127 | 1 | 1 RP11-3L10.2   | -      |
| ENSG00000227374 | 5.13E-15 | -2.63127 | 1 | 1 RP11-109A6.3  | -      |
| ENSG00000227379 | 5.13E-15 | -2.63127 | 1 | 1 PPIAP2        | K03767 |
| ENSG00000227382 | 5.13E-15 | -2.63127 | 1 | 1 EIF4A2P2      | K03257 |
| ENSG00000227383 | 5.13E-15 | -2.63127 | 1 | 1 RP11-571F15.2 | K02917 |
| ENSG00000227386 | 5.13E-15 | -2.63127 | 1 | 1 AC091705.1    | -      |
| ENSG00000227391 | 5.13E-15 | -2.63127 | 1 | 1 SALL1P1       | -      |
| ENSG00000227392 | 5.13E-15 | -2.63127 | 1 | 1 HPN-AS1       | -      |
| ENSG00000227393 | 5.13E-15 | -2.63127 | 1 | 1 RP6-127F18.2  | -      |
| ENSG00000227394 | 5.13E-15 | -2.63127 | 1 | 1 AC007386.3    | K02868 |
| ENSG00000227395 | 5.13E-15 | -2.63127 | 1 | 1 EIF2AP4       | K15026 |
| ENSG00000227397 | 5.13E-15 | -2.63127 | 1 | 1 CTD-2526L21.3 | K05357 |
| ENSG00000227399 | 5.13E-15 | -2.63127 | 1 | 1 RP11-118F2.2  | K02889 |
| ENSG00000227400 | 5.13E-15 | -2.63127 | 1 | 1 AC012501.2    | -      |
| ENSG00000227401 | 5.13E-15 | -2.63127 | 1 | 1 RPL37P1       | K02922 |
| ENSG00000227404 | 5.13E-15 | -2.63127 | 1 | 1 KRT8P20       | K07605 |
| ENSG00000227406 | 5.13E-15 | -2.63127 | 1 | 1 RNF6P1        | -      |
| ENSG00000227407 | 5.13E-15 | -2.63127 | 1 | 1 AC008746.3    | -      |
| ENSG00000227408 | 5.13E-15 | -2.63127 | 1 | 1 AMYP1         | K01176 |
| ENSG00000227409 | 5.13E-15 | -2.63127 | 1 | 1 ZMYM4-AS1     | -      |
| ENSG00000227411 | 5.13E-15 | -2.63127 | 1 | 1 BAATP1        | K00659 |
| ENSG00000227412 | 5.13E-15 | -2.63127 | 1 | 1 STK33P1       | -      |
| ENSG00000227415 | 5.13E-15 | -2.63127 | 1 | 1 RP1-91G5.3    | -      |
| ENSG00000227416 | 5.13E-15 | -2.63127 | 1 | 1 RP11-109P14.2 | -      |
| ENSG00000227417 | 5.13E-15 | -2.63127 | 1 | 1 RP11-397P13.6 | K12198 |
| ENSG00000227418 | 5.13E-15 | -2.63127 | 1 | 1 PCGEM1        | -      |
| ENSG00000227421 | 5.13E-15 | -2.63127 | 1 | 1 RP11-476B1.1  | -      |
| ENSG00000227423 | 5.13E-15 | -2.63127 | 1 | 1 OR10U1P       | K04257 |
| ENSG00000227425 | 5.13E-15 | -2.63127 | 1 | 1 MRPS21P2      | K02970 |
| ENSG00000227426 | 5.13E-15 | -2.63127 | 1 | 1 VN1R33P       | K04614 |
| ENSG00000227427 | 5.13E-15 | -2.63127 | 1 | 1 RP1-49C23.1   | K00025 |
| ENSG00000227430 | 5.13E-15 | -2.63127 | 1 | 1 AC019185.2    | K11253 |
| ENSG00000227432 | 5.13E-15 | -2.63127 | 1 | 1 AC053503.11   | -      |
| ENSG00000227433 | 5.13E-15 | -2.63127 | 1 | 1 AC069213.4    | K02910 |



|                 |          |          |   |                 |        |
|-----------------|----------|----------|---|-----------------|--------|
| ENSG00000227434 | 5.13E-15 | -2.63127 | 1 | 1 RNF19BPX      | -      |
| ENSG00000227436 | 5.13E-15 | -2.63127 | 1 | 1 FCF1P1        | K14566 |
| ENSG00000227437 | 5.13E-15 | -2.63127 | 1 | 1 RP11-179H18.5 | K02995 |
| ENSG00000227438 | 5.13E-15 | -2.63127 | 1 | 1 AP001471.1    | -      |
| ENSG00000227439 | 5.13E-15 | -2.63127 | 1 | 1 TTTY17B       | -      |
| ENSG00000227443 | 5.13E-15 | -2.63127 | 1 | 1 RP11-344A7.1  | -      |
| ENSG00000227444 | 5.13E-15 | -2.63127 | 1 | 1 AC007322.5    | -      |
| ENSG00000227445 | 5.13E-15 | -2.63127 | 1 | 1 OR10R1P       | K04257 |
| ENSG00000227447 | 5.13E-15 | -2.63127 | 1 | 1 XGPY          | -      |
| ENSG00000227449 | 5.13E-15 | -2.63127 | 1 | 1 RP11-111F5.5  | K04358 |
| ENSG00000227453 | 5.13E-15 | -2.63127 | 1 | 1 HNRNPA1P63    | K12741 |
| ENSG00000227454 | 5.13E-15 | -2.63127 | 1 | 1 MTND4P30      | K04613 |
| ENSG00000227455 | 5.13E-15 | -2.63127 | 1 | 1 RP11-300M24.1 | -      |
| ENSG00000227456 | 5.13E-15 | -2.63127 | 1 | 1 LINC00310     | -      |
| ENSG00000227462 | 5.13E-15 | -2.63127 | 1 | 1 RP11-108B14.4 | K06697 |
| ENSG00000227465 | 5.13E-15 | -2.63127 | 1 | 1 GPN3P1        | K06883 |
| ENSG00000227466 | 5.13E-15 | -2.63127 | 1 | 1 RP11-397C12.1 | -      |
| ENSG00000227468 | 5.13E-15 | -2.63127 | 1 | 1 AL928742.12   | -      |
| ENSG00000227469 | 5.13E-15 | -2.63127 | 1 | 1 RBM22P8       | K12872 |
| ENSG00000227474 | 5.13E-15 | -2.63127 | 1 | 1 RP11-295P9.2  | K02934 |
| ENSG00000227475 | 5.13E-15 | -2.63127 | 1 | 1 RP11-810B23.1 | -      |
| ENSG00000227480 | 5.13E-15 | -2.63127 | 1 | 1 CCDC148-AS1   | -      |
| ENSG00000227481 | 5.13E-15 | -2.63127 | 1 | 1 RP11-89N17.2  | -      |
| ENSG00000227482 | 5.13E-15 | -2.63127 | 1 | 1 RP11-18B16.2  | -      |
| ENSG00000227484 | 5.13E-15 | -2.63127 | 1 | 1 XX-C283C717.1 | -      |
| ENSG00000227485 | 5.13E-15 | -2.63127 | 1 | 1 RP11-5P4.2    | -      |
| ENSG00000227486 | 5.13E-15 | -2.63127 | 1 | 1 RP13-188A5.1  | -      |
| ENSG00000227487 | 5.13E-15 | -2.63127 | 1 | 1 NCAM1-AS1     | -      |
| ENSG00000227488 | 5.13E-15 | -2.63127 | 1 | 1 GAGE12D       | -      |
| ENSG00000227489 | 5.13E-15 | -2.63127 | 1 | 1 AC006458.3    | -      |
| ENSG00000227490 | 5.13E-15 | -2.63127 | 1 | 1 RP11-157L3.6  | -      |
| ENSG00000227491 | 5.13E-15 | -2.63127 | 1 | 1 CCNJP1        | -      |
| ENSG00000227493 | 5.13E-15 | -2.63127 | 1 | 1 RP11-104D21.1 | -      |
| ENSG00000227494 | 5.13E-15 | -2.63127 | 1 | 1 USP9YP14      | K11840 |
| ENSG00000227497 | 5.13E-15 | -2.63127 | 1 | 1 PABPC1P6      | K13126 |
| ENSG00000227498 | 5.13E-15 | -2.63127 | 1 | 1 AC018359.3    | -      |
| ENSG00000227499 | 5.13E-15 | -2.63127 | 1 | 1 RP11-419M24.4 | K04393 |
| ENSG00000227505 | 5.13E-15 | -2.63127 | 1 | 1 RP11-434J24.2 | -      |
| ENSG00000227507 | 5.13E-15 | -2.63127 | 1 | 1 LTB           | K03157 |
| ENSG00000227508 | 5.13E-15 | -2.63127 | 1 | 1 RP5-894D12.3  | -      |
| ENSG00000227509 | 5.13E-15 | -2.63127 | 1 | 1 EIF2B5-IT1    | -      |
| ENSG00000227510 | 5.13E-15 | -2.63127 | 1 | 1 RP11-196P2.1  | -      |
| ENSG00000227511 | 5.13E-15 | -2.63127 | 1 | 1 GS1-466O4.2   | -      |
| ENSG00000227512 | 5.13E-15 | -2.63127 | 1 | 1 RP11-413M3.4  | -      |
| ENSG00000227513 | 5.13E-15 | -2.63127 | 1 | 1 AC114755.3    | -      |
| ENSG00000227514 | 5.13E-15 | -2.63127 | 1 | 1 RP11-709P2.1  | K02883 |
| ENSG00000227515 | 5.13E-15 | -2.63127 | 1 | 1 C1DP4         | K12592 |
| ENSG00000227516 | 5.13E-15 | -2.63127 | 1 | 1 RP5-973N23.4  | -      |
| ENSG00000227517 | 5.13E-15 | -2.63127 | 1 | 1 AC003051.1    | -      |
| ENSG00000227518 | 5.13E-15 | -2.63127 | 1 | 1 MIR1302-9     | -      |
| ENSG00000227519 | 5.13E-15 | -2.63127 | 1 | 1 CTA-342B11.1  | -      |
| ENSG00000227521 | 5.13E-15 | -2.63127 | 1 | 1 RP13-213K19.1 | -      |
| ENSG00000227523 | 5.13E-15 | -2.63127 | 1 | 1 RPS20P15      | K02969 |
| ENSG00000227525 | 5.13E-15 | -2.63127 | 1 | 1 RPL7P6        | K02937 |
| ENSG00000227531 | 5.13E-15 | -2.63127 | 1 | 1 RP11-202G18.1 | -      |
| ENSG00000227532 | 5.13E-15 | -2.63127 | 1 | 1 AC002542.2    | -      |
| ENSG00000227534 | 5.13E-15 | -2.63127 | 1 | 1 RP3-323B6.1   | K12393 |
| ENSG00000227535 | 5.13E-15 | -2.63127 | 1 | 1 RP11-809N15.2 | -      |

|                 |          |          |   |                 |        |
|-----------------|----------|----------|---|-----------------|--------|
| ENSG00000227537 | 5.13E-15 | -2.63127 | 1 | 1 RP11-215C7.3  | —      |
| ENSG00000227538 | 5.13E-15 | -2.63127 | 1 | 1 HNRNPPFP1     | K12898 |
| ENSG00000227541 | 5.13E-15 | -2.63127 | 1 | 1 RP3-525N14.2  | —      |
| ENSG00000227544 | 5.13E-15 | -2.63127 | 1 | 1 AC018647.3    | —      |
| ENSG00000227545 | 5.13E-15 | -2.63127 | 1 | 1 RP5-905H7.10  | K15100 |
| ENSG00000227547 | 5.13E-15 | -2.63127 | 1 | 1 OR4A2P        | K04257 |
| ENSG00000227549 | 5.13E-15 | -2.63127 | 1 | 1 AC116035.2    | —      |
| ENSG00000227550 | 5.13E-15 | -2.63127 | 1 | 1 TRBV7-5       | K10785 |
| ENSG00000227551 | 5.13E-15 | -2.63127 | 1 | 1 USP17L12      | K11845 |
| ENSG00000227552 | 5.13E-15 | -2.63127 | 1 | 1 RP11-417J8.1  | —      |
| ENSG00000227554 | 5.13E-15 | -2.63127 | 1 | 1 RP11-444D13.1 | —      |
| ENSG00000227555 | 5.13E-15 | -2.63127 | 1 | 1 RP11-406A20.4 | —      |
| ENSG00000227556 | 5.13E-15 | -2.63127 | 1 | 1 RP11-472F19.1 | K14191 |
| ENSG00000227557 | 5.13E-15 | -2.63127 | 1 | 1 MTND3P9       | —      |
| ENSG00000227560 | 5.13E-15 | -2.63127 | 1 | 1 RP11-139K1.2  | K04491 |
| ENSG00000227562 | 5.13E-15 | -2.63127 | 1 | 1 RP11-796I2.1  | —      |
| ENSG00000227563 | 5.13E-15 | -2.63127 | 1 | 1 RNF11B        | K11980 |
| ENSG00000227564 | 5.13E-15 | -2.63127 | 1 | 1 LINC00376     | —      |
| ENSG00000227568 | 5.13E-15 | -2.63127 | 1 | 1 SNX18P26      | K17299 |
| ENSG00000227569 | 5.13E-15 | -2.63127 | 1 | 1 RP11-266E16.1 | —      |
| ENSG00000227573 | 5.13E-15 | -2.63127 | 1 | 1 RP5-1166A24.1 | K04735 |
| ENSG00000227574 | 5.13E-15 | -2.63127 | 1 | 1 RP13-1039J1.3 | —      |
| ENSG00000227578 | 5.13E-15 | -2.63127 | 1 | 1 RPS3AP53      | K02984 |
| ENSG00000227579 | 5.13E-15 | -2.63127 | 1 | 1 RP1-35C21.2   | —      |
| ENSG00000227583 | 5.13E-15 | -2.63127 | 1 | 1 RP11-119F7.3  | K02984 |
| ENSG00000227584 | 5.13E-15 | -2.63127 | 1 | 1 MTND4P5       | —      |
| ENSG00000227585 | 5.13E-15 | -2.63127 | 1 | 1 RP11-103C3.2  | K15285 |
| ENSG00000227586 | 5.13E-15 | -2.63127 | 1 | 1 RP11-162A23.5 | K02976 |
| ENSG00000227588 | 5.13E-15 | -2.63127 | 1 | 1 CNTN4-AS2     | —      |
| ENSG00000227589 | 5.13E-15 | -2.63127 | 1 | 1 RP5-1092A11.5 | —      |
| ENSG00000227590 | 5.13E-15 | -2.63127 | 1 | 1 ATP5G1P5      | K02128 |
| ENSG00000227592 | 5.13E-15 | -2.63127 | 1 | 1 PIGFP3        | K05287 |
| ENSG00000227593 | 5.13E-15 | -2.63127 | 1 | 1 RP11-715G18.3 | K17080 |
| ENSG00000227597 | 5.13E-15 | -2.63127 | 1 | 1 AC019100.7    | K05753 |
| ENSG00000227598 | 5.13E-15 | -2.63127 | 1 | 1 RP1-167A14.2  | —      |
| ENSG00000227599 | 5.13E-15 | -2.63127 | 1 | 1 RP4-753D4.2   | —      |
| ENSG00000227602 | 5.13E-15 | -2.63127 | 1 | 1 RP3-445N2.1   | —      |
| ENSG00000227604 | 5.13E-15 | -2.63127 | 1 | 1 TOMM22P3      | K17769 |
| ENSG00000227607 | 5.13E-15 | -2.63127 | 1 | 1 SUMO2P2       | K12160 |
| ENSG00000227609 | 5.13E-15 | -2.63127 | 1 | 1 TMEM183AP1    | —      |
| ENSG00000227610 | 5.13E-15 | -2.63127 | 1 | 1 FRMPD3-AS1    | —      |
| ENSG00000227611 | 5.13E-15 | -2.63127 | 1 | 1 LINC01074     | —      |
| ENSG00000227613 | 5.13E-15 | -2.63127 | 1 | 1 QRSL1P2       | K02433 |
| ENSG00000227616 | 5.13E-15 | -2.63127 | 1 | 1 AC063976.1    | —      |
| ENSG00000227617 | 5.13E-15 | -2.63127 | 1 | 1 CERS6-AS1     | —      |
| ENSG00000227621 | 5.13E-15 | -2.63127 | 1 | 1 PHBP11        | K17080 |
| ENSG00000227623 | 5.13E-15 | -2.63127 | 1 | 1 AC073987.2    | —      |
| ENSG00000227624 | 5.13E-15 | -2.63127 | 1 | 1 SNRPEP3       | K11097 |
| ENSG00000227625 | 5.13E-15 | -2.63127 | 1 | 1 RP11-520H14.1 | —      |
| ENSG00000227627 | 5.13E-15 | -2.63127 | 1 | 1 RP1-101K10.6  | —      |
| ENSG00000227628 | 5.13E-15 | -2.63127 | 1 | 1 RP11-472D17.3 | —      |
| ENSG00000227629 | 5.13E-15 | -2.63127 | 1 | 1 SLC25A15P1    | K15101 |
| ENSG00000227633 | 5.13E-15 | -2.63127 | 1 | 1 RBMY2YP       | K12885 |
| ENSG00000227634 | 5.13E-15 | -2.63127 | 1 | 1 RP11-431K24.3 | —      |
| ENSG00000227635 | 5.13E-15 | -2.63127 | 1 | 1 USP9YP21      | —      |
| ENSG00000227637 | 5.13E-15 | -2.63127 | 1 | 1 RP11-242O24.5 | —      |
| ENSG00000227640 | 5.13E-15 | -2.63127 | 1 | 1 SOX21-AS1     | —      |
| ENSG00000227644 | 5.13E-15 | -2.63127 | 1 | 1 HIGD1AP11     | —      |

|                 |          |          |   |                    |        |
|-----------------|----------|----------|---|--------------------|--------|
| ENSG00000227645 | 5.13E-15 | -2.63127 | 1 | 1 RPL7P54          | K02937 |
| ENSG00000227646 | 5.13E-15 | -2.63127 | 1 | 1 STEAP2-AS1       | -      |
| ENSG00000227649 | 5.13E-15 | -2.63127 | 1 | 1 RP11-522L3.9     | -      |
| ENSG00000227657 | 5.13E-15 | -2.63127 | 1 | 1 RP13-483F6.1     | -      |
| ENSG00000227658 | 5.13E-15 | -2.63127 | 1 | 1 AC005160.3       | -      |
| ENSG00000227660 | 5.13E-15 | -2.63127 | 1 | 1 RP11-162J8.2     | -      |
| ENSG00000227661 | 5.13E-15 | -2.63127 | 1 | 1 AC073869.10      | -      |
| ENSG00000227663 | 5.13E-15 | -2.63127 | 1 | 1 RPL7P2           | K02937 |
| ENSG00000227667 | 5.13E-15 | -2.63127 | 1 | 1 RP11-331H2.3     | K02271 |
| ENSG00000227673 | 5.13E-15 | -2.63127 | 1 | 1 RP11-243J18.2    | -      |
| ENSG00000227674 | 5.13E-15 | -2.63127 | 1 | 1 LINC00355        | -      |
| ENSG00000227675 | 5.13E-15 | -2.63127 | 1 | 1 GS1-256O22.1     | -      |
| ENSG00000227678 | 5.13E-15 | -2.63127 | 1 | 1 RP11-73O6.3      | -      |
| ENSG00000227679 | 5.13E-15 | -2.63127 | 1 | 1 RP11-453N3.1     | K12019 |
| ENSG00000227680 | 5.13E-15 | -2.63127 | 1 | 1 AC108051.2       | -      |
| ENSG00000227681 | 5.13E-15 | -2.63127 | 1 | 1 RP11-307P5.1     | -      |
| ENSG00000227682 | 5.13E-15 | -2.63127 | 1 | 1 ATP5A1P2         | K02132 |
| ENSG00000227683 | 5.13E-15 | -2.63127 | 1 | 1 RP11-445N18.5    | -      |
| ENSG00000227685 | 5.13E-15 | -2.63127 | 1 | 1 AC087499.10      | -      |
| ENSG00000227687 | 5.13E-15 | -2.63127 | 1 | 1 RP4-681L3.2      | -      |
| ENSG00000227688 | 5.13E-15 | -2.63127 | 1 | 1 HNRNPA3P2        | K12741 |
| ENSG00000227689 | 5.13E-15 | -2.63127 | 1 | 1 SRP68P2          | K03107 |
| ENSG00000227691 | 5.13E-15 | -2.63127 | 1 | 1 CYCSP41          | K08738 |
| ENSG00000227693 | 5.13E-15 | -2.63127 | 1 | 1 GSTM3P1          | K00799 |
| ENSG00000227695 | 5.13E-15 | -2.63127 | 1 | 1 DNMBP-AS1        | -      |
| ENSG00000227700 | 5.13E-15 | -2.63127 | 1 | 1 RP11-301M17.1    | -      |
| ENSG00000227702 | 5.13E-15 | -2.63127 | 1 | 1 LINC00111        | -      |
| ENSG00000227704 | 5.13E-15 | -2.63127 | 1 | 1 RP1-266L20.4     | -      |
| ENSG00000227705 | 5.13E-15 | -2.63127 | 1 | 1 RP11-15M15.2     | -      |
| ENSG00000227706 | 5.13E-15 | -2.63127 | 1 | 1 RP11-301G19.1    | -      |
| ENSG00000227707 | 5.13E-15 | -2.63127 | 1 | 1 SDAD1P3          | -      |
| ENSG00000227708 | 5.13E-15 | -2.63127 | 1 | 1 AC079150.3       | -      |
| ENSG00000227709 | 5.13E-15 | -2.63127 | 1 | 1 RP11-118D22.3    | K12857 |
| ENSG00000227710 | 5.13E-15 | -2.63127 | 1 | 1 LL22NC03-30E12.1 | -      |
| ENSG00000227711 | 5.13E-15 | -2.63127 | 1 | 1 RP11-275O4.3     | -      |
| ENSG00000227713 | 5.13E-15 | -2.63127 | 1 | 1 AC116609.1       | -      |
| ENSG00000227714 | 5.13E-15 | -2.63127 | 1 | 1 MTND6P18         | -      |
| ENSG00000227716 | 5.13E-15 | -2.63127 | 1 | 1 AP000459.7       | -      |
| ENSG00000227717 | 5.13E-15 | -2.63127 | 1 | 1 RP11-578F21.4    | -      |
| ENSG00000227718 | 5.13E-15 | -2.63127 | 1 | 1 AC016730.1       | -      |
| ENSG00000227721 | 5.13E-15 | -2.63127 | 1 | 1 RPSAP64          | K02998 |
| ENSG00000227722 | 5.13E-15 | -2.63127 | 1 | 1 RP5-1059H15.1    | K10427 |
| ENSG00000227723 | 5.13E-15 | -2.63127 | 1 | 1 CTA-31J9.2       | -      |
| ENSG00000227726 | 5.13E-15 | -2.63127 | 1 | 1 AP001271.3       | -      |
| ENSG00000227728 | 5.13E-15 | -2.63127 | 1 | 1 RP11-690C23.4    | K11837 |
| ENSG00000227730 | 5.13E-15 | -2.63127 | 1 | 1 MTND6P5          | -      |
| ENSG00000227733 | 5.13E-15 | -2.63127 | 1 | 1 RP4-565E6.1      | -      |
| ENSG00000227734 | 5.13E-15 | -2.63127 | 1 | 1 RP11-49L2.1      | -      |
| ENSG00000227735 | 5.13E-15 | -2.63127 | 1 | 1 CYCSP5           | K08738 |
| ENSG00000227736 | 5.13E-15 | -2.63127 | 1 | 1 AC007163.9       | -      |
| ENSG00000227737 | 5.13E-15 | -2.63127 | 1 | 1 OR8B1P           | K04257 |
| ENSG00000227738 | 5.13E-15 | -2.63127 | 1 | 1 AC092646.2       | K03030 |
| ENSG00000227743 | 5.13E-15 | -2.63127 | 1 | 1 RP4-745K6.1      | -      |
| ENSG00000227745 | 5.13E-15 | -2.63127 | 1 | 1 AC098826.5       | K17299 |
| ENSG00000227747 | 5.13E-15 | -2.63127 | 1 | 1 RP11-16L9.1      | K02981 |
| ENSG00000227748 | 5.13E-15 | -2.63127 | 1 | 1 RP11-497D6.3     | -      |
| ENSG00000227751 | 5.13E-15 | -2.63127 | 1 | 1 RP1-20B21.4      | -      |
| ENSG00000227753 | 5.13E-15 | -2.63127 | 1 | 1 RP11-216N21.1    | K02929 |

|                 |          |          |   |                   |        |
|-----------------|----------|----------|---|-------------------|--------|
| ENSG00000227755 | 5.13E-15 | -2.63127 | 1 | 1 AP000344.4      | K06638 |
| ENSG00000227757 | 5.13E-15 | -2.63127 | 1 | 1 AP000282.2      | -      |
| ENSG00000227758 | 5.13E-15 | -2.63127 | 1 | 1 HCG9P5          | -      |
| ENSG00000227759 | 5.13E-15 | -2.63127 | 1 | 1 VTI1BP4         | K08493 |
| ENSG00000227760 | 5.13E-15 | -2.63127 | 1 | 1 RP11-298E10.1   | -      |
| ENSG00000227762 | 5.13E-15 | -2.63127 | 1 | 1 GUSBP8          | K01195 |
| ENSG00000227766 | 5.13E-15 | -2.63127 | 1 | 1 HCG4P5          | K06751 |
| ENSG00000227769 | 5.13E-15 | -2.63127 | 1 | 1 AC072062.3      | -      |
| ENSG00000227770 | 5.13E-15 | -2.63127 | 1 | 1 RPL7P12         | K02937 |
| ENSG00000227773 | 5.13E-15 | -2.63127 | 1 | 1 ASH1L-IT1       | -      |
| ENSG00000227776 | 5.13E-15 | -2.63127 | 1 | 1 AKR1D1P1        | K00251 |
| ENSG00000227777 | 5.13E-15 | -2.63127 | 1 | 1 RP4-738P11.3    | K02936 |
| ENSG00000227778 | 5.13E-15 | -2.63127 | 1 | 1 XXyac-YX155B6.2 | K16549 |
| ENSG00000227779 | 5.13E-15 | -2.63127 | 1 | 1 GS1-164F24.1    | K03959 |
| ENSG00000227781 | 5.13E-15 | -2.63127 | 1 | 1 GLUD1P2         | K00261 |
| ENSG00000227782 | 5.13E-15 | -2.63127 | 1 | 1 AC002553.1      | -      |
| ENSG00000227784 | 5.13E-15 | -2.63127 | 1 | 1 ZNF965P         | K09228 |
| ENSG00000227785 | 5.13E-15 | -2.63127 | 1 | 1 AC092013.1      | -      |
| ENSG00000227788 | 5.13E-15 | -2.63127 | 1 | 1 AC012363.8      | K02262 |
| ENSG00000227789 | 5.13E-15 | -2.63127 | 1 | 1 AC098817.3      | K00412 |
| ENSG00000227790 | 5.13E-15 | -2.63127 | 1 | 1 AC015922.5      | -      |
| ENSG00000227791 | 5.13E-15 | -2.63127 | 1 | 1 AC007365.4      | K02947 |
| ENSG00000227792 | 5.13E-15 | -2.63127 | 1 | 1 RP13-210D15.6   | -      |
| ENSG00000227795 | 5.13E-15 | -2.63127 | 1 | 1 AC092796.1      | K03882 |
| ENSG00000227800 | 5.13E-15 | -2.63127 | 1 | 1 IGHD4-17        | -      |
| ENSG00000227802 | 5.13E-15 | -2.63127 | 1 | 1 DNAJB3          | K09509 |
| ENSG00000227803 | 5.13E-15 | -2.63127 | 1 | 1 RP11-239H6.2    | -      |
| ENSG00000227805 | 5.13E-15 | -2.63127 | 1 | 1 RP11-248J23.5   | K02889 |
| ENSG00000227806 | 5.13E-15 | -2.63127 | 1 | 1 OR5W1P          | K04257 |
| ENSG00000227809 | 5.13E-15 | -2.63127 | 1 | 1 RP11-171A24.2   | -      |
| ENSG00000227813 | 5.13E-15 | -2.63127 | 1 | 1 RP1-180M12.1    | K11368 |
| ENSG00000227814 | 5.13E-15 | -2.63127 | 1 | 1 MRPS17P9        | K02961 |
| ENSG00000227815 | 5.13E-15 | -2.63127 | 1 | 1 RP11-195C7.3    | K07059 |
| ENSG00000227817 | 5.13E-15 | -2.63127 | 1 | 1 ARHGAP42P1      | -      |
| ENSG00000227818 | 5.13E-15 | -2.63127 | 1 | 1 RP11-227F8.2    | -      |
| ENSG00000227824 | 5.13E-15 | -2.63127 | 1 | 1 AC122136.2      | -      |
| ENSG00000227825 | 5.13E-15 | -2.63127 | 1 | 1 SLC9A7P1        | K12041 |
| ENSG00000227830 | 5.13E-15 | -2.63127 | 1 | 1 TRIM60P3Y       | -      |
| ENSG00000227832 | 5.13E-15 | -2.63127 | 1 | 1 ST13P21         | K09560 |
| ENSG00000227834 | 5.13E-15 | -2.63127 | 1 | 1 AP003385.2      | -      |
| ENSG00000227835 | 5.13E-15 | -2.63127 | 1 | 1 CARM1P1         | K05931 |
| ENSG00000227836 | 5.13E-15 | -2.63127 | 1 | 1 AC008850.3      | K02969 |
| ENSG00000227837 | 5.13E-15 | -2.63127 | 1 | 1 TRIM60P11Y      | K12029 |
| ENSG00000227839 | 5.13E-15 | -2.63127 | 1 | 1 AL645730.2      | -      |
| ENSG00000227840 | 5.13E-15 | -2.63127 | 1 | 1 KRTAP8-3P       | -      |
| ENSG00000227841 | 5.13E-15 | -2.63127 | 1 | 1 MTND5P31        | -      |
| ENSG00000227842 | 5.13E-15 | -2.63127 | 1 | 1 AC093166.2      | -      |
| ENSG00000227846 | 5.13E-15 | -2.63127 | 1 | 1 UGT1A11P        | K00699 |
| ENSG00000227847 | 5.13E-15 | -2.63127 | 1 | 1 RP11-420H19.2   | K03767 |
| ENSG00000227850 | 5.13E-15 | -2.63127 | 1 | 1 SEPT2P1         | K16942 |
| ENSG00000227851 | 5.13E-15 | -2.63127 | 1 | 1 RP11-381K7.1    | -      |
| ENSG00000227854 | 5.13E-15 | -2.63127 | 1 | 1 RP11-307O1.1    | K02924 |
| ENSG00000227860 | 5.13E-15 | -2.63127 | 1 | 1 MTND5P18        | K03883 |
| ENSG00000227862 | 5.13E-15 | -2.63127 | 1 | 1 HNRNPA1P31      | K12741 |
| ENSG00000227863 | 5.13E-15 | -2.63127 | 1 | 1 AC002383.2      | -      |
| ENSG00000227864 | 5.13E-15 | -2.63127 | 1 | 1 ARL5AP1         | K07949 |
| ENSG00000227867 | 5.13E-15 | -2.63127 | 1 | 1 TCEB1P11        | -      |
| ENSG00000227869 | 5.13E-15 | -2.63127 | 1 | 1 RP11-807H17.1   | -      |

|                 |          |          |   |                 |        |
|-----------------|----------|----------|---|-----------------|--------|
| ENSG00000227871 | 5.13E-15 | -2.63127 | 1 | 1 USP9YP12      | -      |
| ENSG00000227873 | 5.13E-15 | -2.63127 | 1 | 1 RP3-389A20.2  | -      |
| ENSG00000227874 | 5.13E-15 | -2.63127 | 1 | 1 GRAMD4P1      | -      |
| ENSG00000227875 | 5.13E-15 | -2.63127 | 1 | 1 RP11-426M1.2  | K02893 |
| ENSG00000227878 | 5.13E-15 | -2.63127 | 1 | 1 AC114760.1    | K00799 |
| ENSG00000227880 | 5.13E-15 | -2.63127 | 1 | 1 RP11-46E17.6  | -      |
| ENSG00000227881 | 5.13E-15 | -2.63127 | 1 | 1 ASS1P5        | K01940 |
| ENSG00000227882 | 5.13E-15 | -2.63127 | 1 | 1 PRKRIRP6      | -      |
| ENSG00000227883 | 5.13E-15 | -2.63127 | 1 | 1 ATP6V0E1P4    | K02153 |
| ENSG00000227885 | 5.13E-15 | -2.63127 | 1 | 1 RP11-79N23.1  | -      |
| ENSG00000227887 | 5.13E-15 | -2.63127 | 1 | 1 RPS26P13      | K02976 |
| ENSG00000227888 | 5.13E-15 | -2.63127 | 1 | 1 FAM66A        | -      |
| ENSG00000227890 | 5.13E-15 | -2.63127 | 1 | 1 PSMA2P3       | K02726 |
| ENSG00000227892 | 5.13E-15 | -2.63127 | 1 | 1 OR5P4P        | K04257 |
| ENSG00000227893 | 5.13E-15 | -2.63127 | 1 | 1 LINC00352     | -      |
| ENSG00000227895 | 5.13E-15 | -2.63127 | 1 | 1 RP1-272J12.1  | -      |
| ENSG00000227902 | 5.13E-15 | -2.63127 | 1 | 1 AC062032.1    | -      |
| ENSG00000227905 | 5.13E-15 | -2.63127 | 1 | 1 MED6P1        | K15128 |
| ENSG00000227907 | 5.13E-15 | -2.63127 | 1 | 1 RP11-102C16.3 | -      |
| ENSG00000227911 | 5.13E-15 | -2.63127 | 1 | 1 RP11-141M1.1  | -      |
| ENSG00000227912 | 5.13E-15 | -2.63127 | 1 | 1 RP11-69C17.3  | -      |
| ENSG00000227913 | 5.13E-15 | -2.63127 | 1 | 1 KRT8P44       | K07605 |
| ENSG00000227914 | 5.13E-15 | -2.63127 | 1 | 1 RP11-130C19.3 | -      |
| ENSG00000227915 | 5.13E-15 | -2.63127 | 1 | 1 TCEB1P16      | -      |
| ENSG00000227917 | 5.13E-15 | -2.63127 | 1 | 1 RP11-143M1.3  | -      |
| ENSG00000227919 | 5.13E-15 | -2.63127 | 1 | 1 AL353997.11   | K06630 |
| ENSG00000227920 | 5.13E-15 | -2.63127 | 1 | 1 RP1-153P14.5  | -      |
| ENSG00000227921 | 5.13E-15 | -2.63127 | 1 | 1 AL353791.1    | -      |
| ENSG00000227922 | 5.13E-15 | -2.63127 | 1 | 1 SPTLC1P5      | K00654 |
| ENSG00000227923 | 5.13E-15 | -2.63127 | 1 | 1 RP5-905H7.7   | -      |
| ENSG00000227924 | 5.13E-15 | -2.63127 | 1 | 1 RBPJP6        | K06053 |
| ENSG00000227925 | 5.13E-15 | -2.63127 | 1 | 1 RP11-191N8.2  | -      |
| ENSG00000227927 | 5.13E-15 | -2.63127 | 1 | 1 MACROD2-IT1   | -      |
| ENSG00000227929 | 5.13E-15 | -2.63127 | 1 | 1 SRGAP3-AS3    | -      |
| ENSG00000227930 | 5.13E-15 | -2.63127 | 1 | 1 AC009508.1    | -      |
| ENSG00000227932 | 5.13E-15 | -2.63127 | 1 | 1 RP13-16H11.2  | -      |
| ENSG00000227933 | 5.13E-15 | -2.63127 | 1 | 1 RP11-331F9.4  | -      |
| ENSG00000227935 | 5.13E-15 | -2.63127 | 1 | 1 RP6-102O10.1  | -      |
| ENSG00000227937 | 5.13E-15 | -2.63127 | 1 | 1 MTND2P30      | K03879 |
| ENSG00000227938 | 5.13E-15 | -2.63127 | 1 | 1 AC104695.4    | -      |
| ENSG00000227939 | 5.13E-15 | -2.63127 | 1 | 1 RPL3P2        | K02925 |
| ENSG00000227940 | 5.13E-15 | -2.63127 | 1 | 1 RP11-372M18.1 | -      |
| ENSG00000227942 | 5.13E-15 | -2.63127 | 1 | 1 FRMD8P1       | K18047 |
| ENSG00000227945 | 5.13E-15 | -2.63127 | 1 | 1 RP11-103C16.2 | -      |
| ENSG00000227947 | 5.13E-15 | -2.63127 | 1 | 1 RP11-543D5.1  | -      |
| ENSG00000227949 | 5.13E-15 | -2.63127 | 1 | 1 CYCSP46       | K08738 |
| ENSG00000227950 | 5.13E-15 | -2.63127 | 1 | 1 RP11-312B8.2  | K02922 |
| ENSG00000227952 | 5.13E-15 | -2.63127 | 1 | 1 RPL18AP17     | -      |
| ENSG00000227958 | 5.13E-15 | -2.63127 | 1 | 1 RP11-399H11.3 | -      |
| ENSG00000227960 | 5.13E-15 | -2.63127 | 1 | 1 RP5-837I24.6  | -      |
| ENSG00000227964 | 5.13E-15 | -2.63127 | 1 | 1 RP5-1112F19.2 | -      |
| ENSG00000227965 | 5.13E-15 | -2.63127 | 1 | 1 AC098592.6    | -      |
| ENSG00000227968 | 5.13E-15 | -2.63127 | 1 | 1 AC004014.4    | K02180 |
| ENSG00000227969 | 5.13E-15 | -2.63127 | 1 | 1 NPM1P22       | K11276 |
| ENSG00000227970 | 5.13E-15 | -2.63127 | 1 | 1 NR1H5P        | K08538 |
| ENSG00000227971 | 5.13E-15 | -2.63127 | 1 | 1 RP11-600G3.1  | K12900 |
| ENSG00000227972 | 5.13E-15 | -2.63127 | 1 | 1 PRKRIRP3      | -      |
| ENSG00000227979 | 5.13E-15 | -2.63127 | 1 | 1 AC002127.2    | -      |

|                 |          |          |   |                 |        |
|-----------------|----------|----------|---|-----------------|--------|
| ENSG00000227981 | 5.13E-15 | -2.63127 | 1 | 1 AC012668.3    | -      |
| ENSG00000227982 | 5.13E-15 | -2.63127 | 1 | 1 RPL7P30       | K02937 |
| ENSG00000227983 | 5.13E-15 | -2.63127 | 1 | 1 BRK1P2        | -      |
| ENSG00000227987 | 5.13E-15 | -2.63127 | 1 | 1 AC092675.4    | -      |
| ENSG00000227988 | 5.13E-15 | -2.63127 | 1 | 1 TDGF1P1       | -      |
| ENSG00000227989 | 5.13E-15 | -2.63127 | 1 | 1 AC010141.8    | -      |
| ENSG00000227994 | 5.13E-15 | -2.63127 | 1 | 1 RP5-891H21.1  | -      |
| ENSG00000227995 | 5.13E-15 | -2.63127 | 1 | 1 RAB11AP1      | K07904 |
| ENSG00000227997 | 5.13E-15 | -2.63127 | 1 | 1 CENPVP2       | -      |
| ENSG00000228000 | 5.13E-15 | -2.63127 | 1 | 1 RPL7AP65      | K02936 |
| ENSG00000228002 | 5.13E-15 | -2.63127 | 1 | 1 DHX9P1        | K13184 |
| ENSG00000228004 | 5.13E-15 | -2.63127 | 1 | 1 MYCLP2        | K09110 |
| ENSG00000228005 | 5.13E-15 | -2.63127 | 1 | 1 AC020743.2    | -      |
| ENSG00000228012 | 5.13E-15 | -2.63127 | 1 | 1 RP11-393M18.1 | -      |
| ENSG00000228013 | 5.13E-15 | -2.63127 | 1 | 1 RP11-350G8.5  | -      |
| ENSG00000228014 | 5.13E-15 | -2.63127 | 1 | 1 RP11-321E8.5  | K09228 |
| ENSG00000228015 | 5.13E-15 | -2.63127 | 1 | 1 AC074338.5    | K01081 |
| ENSG00000228016 | 5.13E-15 | -2.63127 | 1 | 1 RAPGEF4-AS1   | -      |
| ENSG00000228019 | 5.13E-15 | -2.63127 | 1 | 1 RP11-166O4.4  | K02905 |
| ENSG00000228020 | 5.13E-15 | -2.63127 | 1 | 1 HNRNPA1P46    | K12741 |
| ENSG00000228022 | 5.13E-15 | -2.63127 | 1 | 1 HCG20         | -      |
| ENSG00000228024 | 5.13E-15 | -2.63127 | 1 | 1 CYP1D1P       | K17813 |
| ENSG00000228027 | 5.13E-15 | -2.63127 | 1 | 1 RP1-251M9.3   | -      |
| ENSG00000228030 | 5.13E-15 | -2.63127 | 1 | 1 AC019084.7    | K02889 |
| ENSG00000228031 | 5.13E-15 | -2.63127 | 1 | 1 AC078842.3    | -      |
| ENSG00000228034 | 5.13E-15 | -2.63127 | 1 | 1 HMGN2P21      | K11300 |
| ENSG00000228035 | 5.13E-15 | -2.63127 | 1 | 1 RP4-663N10.1  | -      |
| ENSG00000228036 | 5.13E-15 | -2.63127 | 1 | 1 HSPD1P9       | K04077 |
| ENSG00000228038 | 5.13E-15 | -2.63127 | 1 | 1 VN1R51P       | -      |
| ENSG00000228039 | 5.13E-15 | -2.63127 | 1 | 1 KB-1125A3.10  | K00799 |
| ENSG00000228041 | 5.13E-15 | -2.63127 | 1 | 1 RP4-581F12.1  | K03245 |
| ENSG00000228042 | 5.13E-15 | -2.63127 | 1 | 1 RP11-441A11.1 | K10089 |
| ENSG00000228045 | 5.13E-15 | -2.63127 | 1 | 1 DNAJA1P6      | -      |
| ENSG00000228046 | 5.13E-15 | -2.63127 | 1 | 1 RP11-15B24.2  | K02262 |
| ENSG00000228048 | 5.13E-15 | -2.63127 | 1 | 1 RP11-598C10.1 | -      |
| ENSG00000228051 | 5.13E-15 | -2.63127 | 1 | 1 RP11-325E14.2 | K12866 |
| ENSG00000228053 | 5.13E-15 | -2.63127 | 1 | 1 RP11-151F5.2  | K02889 |
| ENSG00000228054 | 5.13E-15 | -2.63127 | 1 | 1 RANP5         | K07936 |
| ENSG00000228055 | 5.13E-15 | -2.63127 | 1 | 1 LINC00864     | -      |
| ENSG00000228058 | 5.13E-15 | -2.63127 | 1 | 1 RP11-552D4.1  | -      |
| ENSG00000228061 | 5.13E-15 | -2.63127 | 1 | 1 Z83001.1      | -      |
| ENSG00000228064 | 5.13E-15 | -2.63127 | 1 | 1 AC023469.2    | -      |
| ENSG00000228065 | 5.13E-15 | -2.63127 | 1 | 1 RP11-222A11.1 | -      |
| ENSG00000228067 | 5.13E-15 | -2.63127 | 1 | 1 RP11-61J19.3  | -      |
| ENSG00000228071 | 5.13E-15 | -2.63127 | 1 | 1 RPL7P47       | K02937 |
| ENSG00000228073 | 5.13E-15 | -2.63127 | 1 | 1 AC133106.2    | -      |
| ENSG00000228074 | 5.13E-15 | -2.63127 | 1 | 1 UBBP5         | K08770 |
| ENSG00000228075 | 5.13E-15 | -2.63127 | 1 | 1 BOD1L2        | -      |
| ENSG00000228076 | 5.13E-15 | -2.63127 | 1 | 1 RP11-475E11.2 | K01097 |
| ENSG00000228078 | 5.13E-15 | -2.63127 | 1 | 1 HLA-U         | K06751 |
| ENSG00000228081 | 5.13E-15 | -2.63127 | 1 | 1 RP11-385M4.2  | K04364 |
| ENSG00000228082 | 5.13E-15 | -2.63127 | 1 | 1 RP1-121G13.2  | -      |
| ENSG00000228083 | 5.13E-15 | -2.63127 | 1 | 1 IFNA14        | K05414 |
| ENSG00000228085 | 5.13E-15 | -2.63127 | 1 | 1 AC004920.2    | K02924 |
| ENSG00000228092 | 5.13E-15 | -2.63127 | 1 | 1 COX6CP15      | K02268 |
| ENSG00000228095 | 5.13E-15 | -2.63127 | 1 | 1 RP11-361M4.1  | -      |
| ENSG00000228097 | 5.13E-15 | -2.63127 | 1 | 1 RP11-39K24.12 | K02126 |
| ENSG00000228098 | 5.13E-15 | -2.63127 | 1 | 1 AC110620.1    | -      |

|                 |          |          |   |                    |        |
|-----------------|----------|----------|---|--------------------|--------|
| ENSG00000228105 | 5.13E-15 | -2.63127 | 1 | 1 RP3-340N1.6      | -      |
| ENSG00000228108 | 5.13E-15 | -2.63127 | 1 | 1 AC092839.3       | -      |
| ENSG00000228111 | 5.13E-15 | -2.63127 | 1 | 1 TPT1P2           | -      |
| ENSG00000228112 | 5.13E-15 | -2.63127 | 1 | 1 AC112220.2       | K06566 |
| ENSG00000228118 | 5.13E-15 | -2.63127 | 1 | 1 LOC124685        | K12751 |
| ENSG00000228121 | 5.13E-15 | -2.63127 | 1 | 1 PHBP3            | K17080 |
| ENSG00000228122 | 5.13E-15 | -2.63127 | 1 | 1 MTND1P17         | -      |
| ENSG00000228123 | 5.13E-15 | -2.63127 | 1 | 1 RP11-15B24.3     | -      |
| ENSG00000228124 | 5.13E-15 | -2.63127 | 1 | 1 RP1-122O8.7      | -      |
| ENSG00000228127 | 5.13E-15 | -2.63127 | 1 | 1 RP11-12L8.1      | -      |
| ENSG00000228131 | 5.13E-15 | -2.63127 | 1 | 1 IGHD6-6          | -      |
| ENSG00000228132 | 5.13E-15 | -2.63127 | 1 | 1 RP11-279E1.1     | K02437 |
| ENSG00000228133 | 5.13E-15 | -2.63127 | 1 | 1 AC099684.1       | -      |
| ENSG00000228134 | 5.13E-15 | -2.63127 | 1 | 1 AC092578.1       | K10704 |
| ENSG00000228135 | 5.13E-15 | -2.63127 | 1 | 1 AC073128.10      | -      |
| ENSG00000228136 | 5.13E-15 | -2.63127 | 1 | 1 RP11-216M21.5    | -      |
| ENSG00000228139 | 5.13E-15 | -2.63127 | 1 | 1 GS1-421I3.4      | -      |
| ENSG00000228141 | 5.13E-15 | -2.63127 | 1 | 1 AC105339.1       | -      |
| ENSG00000228142 | 5.13E-15 | -2.63127 | 1 | 1 RP11-180I4.2     | -      |
| ENSG00000228143 | 5.13E-15 | -2.63127 | 1 | 1 RP11-308N19.5    | K10143 |
| ENSG00000228144 | 5.13E-15 | -2.63127 | 1 | 1 TMBIM4           | K06890 |
| ENSG00000228151 | 5.13E-15 | -2.63127 | 1 | 1 AC004941.3       | -      |
| ENSG00000228154 | 5.13E-15 | -2.63127 | 1 | 1 RP11-302F12.2    | K03094 |
| ENSG00000228155 | 5.13E-15 | -2.63127 | 1 | 1 AL589685.1       | K18047 |
| ENSG00000228156 | 5.13E-15 | -2.63127 | 1 | 1 RP11-410N8.1     | -      |
| ENSG00000228159 | 5.13E-15 | -2.63127 | 1 | 1 AP001465.5       | -      |
| ENSG00000228160 | 5.13E-15 | -2.63127 | 1 | 1 RP13-57D9.3      | -      |
| ENSG00000228161 | 5.13E-15 | -2.63127 | 1 | 1 LL22NC03-23C6.15 | -      |
| ENSG00000228162 | 5.13E-15 | -2.63127 | 1 | 1 AC097713.3       | -      |
| ENSG00000228165 | 5.13E-15 | -2.63127 | 1 | 1 RP11-125K10.5    | -      |
| ENSG00000228166 | 5.13E-15 | -2.63127 | 1 | 1 MTND1P11         | -      |
| ENSG00000228167 | 5.13E-15 | -2.63127 | 1 | 1 RP11-489C13.1    | K17795 |
| ENSG00000228168 | 5.13E-15 | -2.63127 | 1 | 1 HNRNPA1P21       | K12741 |
| ENSG00000228170 | 5.13E-15 | -2.63127 | 1 | 1 RP1-40E16.11     | -      |
| ENSG00000228171 | 5.13E-15 | -2.63127 | 1 | 1 AC121251.1       | -      |
| ENSG00000228173 | 5.13E-15 | -2.63127 | 1 | 1 AC091770.3       | -      |
| ENSG00000228174 | 5.13E-15 | -2.63127 | 1 | 1 RP11-244N9.6     | -      |
| ENSG00000228176 | 5.13E-15 | -2.63127 | 1 | 1 RP4-656G21.1     | -      |
| ENSG00000228181 | 5.13E-15 | -2.63127 | 1 | 1 RP11-455B2.9     | K03948 |
| ENSG00000228182 | 5.13E-15 | -2.63127 | 1 | 1 MTND2P25         | -      |
| ENSG00000228184 | 5.13E-15 | -2.63127 | 1 | 1 SNX19P1          | K17930 |
| ENSG00000228189 | 5.13E-15 | -2.63127 | 1 | 1 RP13-60M5.2      | -      |
| ENSG00000228190 | 5.13E-15 | -2.63127 | 1 | 1 RP11-104D3.1     | K02893 |
| ENSG00000228191 | 5.13E-15 | -2.63127 | 1 | 1 RP11-345I18.6    | K02924 |
| ENSG00000228193 | 5.13E-15 | -2.63127 | 1 | 1 TCEB1P14         | -      |
| ENSG00000228194 | 5.13E-15 | -2.63127 | 1 | 1 CTA-415G2.2      | -      |
| ENSG00000228195 | 5.13E-15 | -2.63127 | 1 | 1 RPL5P27          | K02932 |
| ENSG00000228198 | 5.13E-15 | -2.63127 | 1 | 1 OR2M3            | K04257 |
| ENSG00000228203 | 5.13E-15 | -2.63127 | 1 | 1 RNF144A-AS1      | -      |
| ENSG00000228206 | 5.13E-15 | -2.63127 | 1 | 1 AC016717.1       | -      |
| ENSG00000228207 | 5.13E-15 | -2.63127 | 1 | 1 AC007967.2       | -      |
| ENSG00000228209 | 5.13E-15 | -2.63127 | 1 | 1 AC073091.2       | K03783 |
| ENSG00000228210 | 5.13E-15 | -2.63127 | 1 | 1 RPL7AL2          | K02936 |
| ENSG00000228211 | 5.13E-15 | -2.63127 | 1 | 1 HYALP1           | K01197 |
| ENSG00000228213 | 5.13E-15 | -2.63127 | 1 | 1 NLGN1-AS1        | -      |
| ENSG00000228214 | 5.13E-15 | -2.63127 | 1 | 1 LINC00693        | -      |
| ENSG00000228215 | 5.13E-15 | -2.63127 | 1 | 1 RP11-541F9.2     | -      |
| ENSG00000228216 | 5.13E-15 | -2.63127 | 1 | 1 RP11-367F23.1    | -      |

|                 |          |          |   |                  |        |
|-----------------|----------|----------|---|------------------|--------|
| ENSG00000228219 | 5.13E-15 | -2.63127 | 1 | 1 NPM1P30        | K11276 |
| ENSG00000228222 | 5.13E-15 | -2.63127 | 1 | 1 AC074363.1     | -      |
| ENSG00000228224 | 5.13E-15 | -2.63127 | 1 | 1 NACAP1         | K03626 |
| ENSG00000228225 | 5.13E-15 | -2.63127 | 1 | 1 AC016908.1     | -      |
| ENSG00000228226 | 5.13E-15 | -2.63127 | 1 | 1 AC074019.1     | -      |
| ENSG00000228229 | 5.13E-15 | -2.63127 | 1 | 1 RP11-219C24.10 | -      |
| ENSG00000228231 | 5.13E-15 | -2.63127 | 1 | 1 RP11-124I4.2   | -      |
| ENSG00000228234 | 5.13E-15 | -2.63127 | 1 | 1 GLRXP          | K03676 |
| ENSG00000228235 | 5.13E-15 | -2.63127 | 1 | 1 AP001476.4     | -      |
| ENSG00000228236 | 5.13E-15 | -2.63127 | 1 | 1 TXNP5          | K03671 |
| ENSG00000228238 | 5.13E-15 | -2.63127 | 1 | 1 GS1-304P7.2    | K09228 |
| ENSG00000228239 | 5.13E-15 | -2.63127 | 1 | 1 RP11-85G21.1   | -      |
| ENSG00000228240 | 5.13E-15 | -2.63127 | 1 | 1 TTTY17A        | -      |
| ENSG00000228241 | 5.13E-15 | -2.63127 | 1 | 1 MOB1AP1        | K06685 |
| ENSG00000228243 | 5.13E-15 | -2.63127 | 1 | 1 RP11-436G20.1  | K02936 |
| ENSG00000228247 | 5.13E-15 | -2.63127 | 1 | 1 UBBP2          | K04551 |
| ENSG00000228248 | 5.13E-15 | -2.63127 | 1 | 1 RP11-111E2.1   | -      |
| ENSG00000228252 | 5.13E-15 | -2.63127 | 1 | 1 COL6A4P2       | -      |
| ENSG00000228255 | 5.13E-15 | -2.63127 | 1 | 1 RP11-323I1.1   | -      |
| ENSG00000228257 | 5.13E-15 | -2.63127 | 1 | 1 AC010141.6     | -      |
| ENSG00000228262 | 5.13E-15 | -2.63127 | 1 | 1 AC073218.2     | -      |
| ENSG00000228272 | 5.13E-15 | -2.63127 | 1 | 1 AC106874.1     | -      |
| ENSG00000228273 | 5.13E-15 | -2.63127 | 1 | 1 MUC3A          | -      |
| ENSG00000228275 | 5.13E-15 | -2.63127 | 1 | 1 ARMCX3-AS1     | -      |
| ENSG00000228277 | 5.13E-15 | -2.63127 | 1 | 1 AC112518.3     | -      |
| ENSG00000228280 | 5.13E-15 | -2.63127 | 1 | 1 RP11-367B6.2   | -      |
| ENSG00000228285 | 5.13E-15 | -2.63127 | 1 | 1 LYPLA2P1       | K06130 |
| ENSG00000228286 | 5.13E-15 | -2.63127 | 1 | 1 AP000593.5     | K14752 |
| ENSG00000228289 | 5.13E-15 | -2.63127 | 1 | 1 RP4-640E24.1   | -      |
| ENSG00000228290 | 5.13E-15 | -2.63127 | 1 | 1 RP11-132M7.3   | -      |
| ENSG00000228291 | 5.13E-15 | -2.63127 | 1 | 1 RP11-445P17.6  | K07945 |
| ENSG00000228293 | 5.13E-15 | -2.63127 | 1 | 1 RP4-686C3.7    | -      |
| ENSG00000228295 | 5.13E-15 | -2.63127 | 1 | 1 LINC00392      | -      |
| ENSG00000228296 | 5.13E-15 | -2.63127 | 1 | 1 TTTY4C         | -      |
| ENSG00000228301 | 5.13E-15 | -2.63127 | 1 | 1 RPL7P55        | K02937 |
| ENSG00000228303 | 5.13E-15 | -2.63127 | 1 | 1 RP11-10F11.2   | K09228 |
| ENSG00000228304 | 5.13E-15 | -2.63127 | 1 | 1 OR4K6P         | K04257 |
| ENSG00000228308 | 5.13E-15 | -2.63127 | 1 | 1 RP11-255G21.1  | -      |
| ENSG00000228309 | 5.13E-15 | -2.63127 | 1 | 1 GS1-204I12.1   | -      |
| ENSG00000228312 | 5.13E-15 | -2.63127 | 1 | 1 GAPDHP45       | K00134 |
| ENSG00000228314 | 5.13E-15 | -2.63127 | 1 | 1 CYP4F29P       | -      |
| ENSG00000228316 | 5.13E-15 | -2.63127 | 1 | 1 RP11-522L3.5   | -      |
| ENSG00000228318 | 5.13E-15 | -2.63127 | 1 | 1 AP001610.5     | -      |
| ENSG00000228319 | 5.13E-15 | -2.63127 | 1 | 1 SPATA2P1       | -      |
| ENSG00000228322 | 5.13E-15 | -2.63127 | 1 | 1 RP11-358M14.2  | -      |
| ENSG00000228325 | 5.13E-15 | -2.63127 | 1 | 1 RP11-685N3.1   | -      |
| ENSG00000228326 | 5.13E-15 | -2.63127 | 1 | 1 RP11-109G10.2  | K02893 |
| ENSG00000228329 | 5.13E-15 | -2.63127 | 1 | 1 AC097495.3     | -      |
| ENSG00000228331 | 5.13E-15 | -2.63127 | 1 | 1 RPL17P43       | K02880 |
| ENSG00000228334 | 5.13E-15 | -2.63127 | 1 | 1 AC024028.1     | -      |
| ENSG00000228336 | 5.13E-15 | -2.63127 | 1 | 1 OR9H1P         | K04257 |
| ENSG00000228337 | 5.13E-15 | -2.63127 | 1 | 1 RP11-804H8.5   | K03767 |
| ENSG00000228338 | 5.13E-15 | -2.63127 | 1 | 1 RP5-845O24.8   | -      |
| ENSG00000228339 | 5.13E-15 | -2.63127 | 1 | 1 AMD1P1         | K01611 |
| ENSG00000228340 | 5.13E-15 | -2.63127 | 1 | 1 RP5-1043L13.1  | -      |
| ENSG00000228341 | 5.13E-15 | -2.63127 | 1 | 1 CTB-20D2.1     | -      |
| ENSG00000228343 | 5.13E-15 | -2.63127 | 1 | 1 RP11-1148L6.5  | -      |
| ENSG00000228345 | 5.13E-15 | -2.63127 | 1 | 1 RP11-12D5.4    | -      |



|                 |          |          |   |                 |        |
|-----------------|----------|----------|---|-----------------|--------|
| ENSG00000228347 | 5.13E-15 | -2.63127 | 1 | 1 FTLP17        | K13625 |
| ENSG00000228348 | 5.13E-15 | -2.63127 | 1 | 1 EFCAB14P1     | -      |
| ENSG00000228349 | 5.13E-15 | -2.63127 | 1 | 1 RPS26P4       | K02976 |
| ENSG00000228350 | 5.13E-15 | -2.63127 | 1 | 1 RP11-148G20.1 | -      |
| ENSG00000228351 | 5.13E-15 | -2.63127 | 1 | 1 AC018832.1    | -      |
| ENSG00000228353 | 5.13E-15 | -2.63127 | 1 | 1 RP11-184A2.2  | -      |
| ENSG00000228354 | 5.13E-15 | -2.63127 | 1 | 1 RP11-552J9.9  | K00819 |
| ENSG00000228355 | 5.13E-15 | -2.63127 | 1 | 1 BX322559.3    | -      |
| ENSG00000228358 | 5.13E-15 | -2.63127 | 1 | 1 AC113617.1    | -      |
| ENSG00000228361 | 5.13E-15 | -2.63127 | 1 | 1 RP11-503C24.3 | -      |
| ENSG00000228364 | 5.13E-15 | -2.63127 | 1 | 1 SAR1P1        | K07953 |
| ENSG00000228365 | 5.13E-15 | -2.63127 | 1 | 1 RP1-90J20.2   | -      |
| ENSG00000228367 | 5.13E-15 | -2.63127 | 1 | 1 RP11-524L6.2  | K01681 |
| ENSG00000228368 | 5.13E-15 | -2.63127 | 1 | 1 AC106873.4    | -      |
| ENSG00000228372 | 5.13E-15 | -2.63127 | 1 | 1 RP11-85L21.4  | -      |
| ENSG00000228373 | 5.13E-15 | -2.63127 | 1 | 1 RP11-497K15.1 | K03948 |
| ENSG00000228374 | 5.13E-15 | -2.63127 | 1 | 1 AC012497.2    | -      |
| ENSG00000228375 | 5.13E-15 | -2.63127 | 1 | 1 RPS20P25      | -      |
| ENSG00000228376 | 5.13E-15 | -2.63127 | 1 | 1 RP11-520B13.4 | -      |
| ENSG00000228379 | 5.13E-15 | -2.63127 | 1 | 1 AC010891.2    | -      |
| ENSG00000228380 | 5.13E-15 | -2.63127 | 1 | 1 AC016697.2    | K12751 |
| ENSG00000228382 | 5.13E-15 | -2.63127 | 1 | 1 ITPKB-IT1     | -      |
| ENSG00000228383 | 5.13E-15 | -2.63127 | 1 | 1 FAM197Y7      | -      |
| ENSG00000228384 | 5.13E-15 | -2.63127 | 1 | 1 AC007040.6    | -      |
| ENSG00000228386 | 5.13E-15 | -2.63127 | 1 | 1 RP5-1125A11.4 | -      |
| ENSG00000228391 | 5.13E-15 | -2.63127 | 1 | 1 AC011995.3    | -      |
| ENSG00000228392 | 5.13E-15 | -2.63127 | 1 | 1 RP11-343J18.1 | -      |
| ENSG00000228397 | 5.13E-15 | -2.63127 | 1 | 1 RP1-224A6.3   | -      |
| ENSG00000228398 | 5.13E-15 | -2.63127 | 1 | 1 HMGN2P25      | K11300 |
| ENSG00000228399 | 5.13E-15 | -2.63127 | 1 | 1 RP4-575N6.2   | K02969 |
| ENSG00000228400 | 5.13E-15 | -2.63127 | 1 | 1 AC079154.1    | -      |
| ENSG00000228401 | 5.13E-15 | -2.63127 | 1 | 1 RP11-251M1.1  | -      |
| ENSG00000228403 | 5.13E-15 | -2.63127 | 1 | 1 RP11-563N6.6  | -      |
| ENSG00000228408 | 5.13E-15 | -2.63127 | 1 | 1 RP1-111D6.3   | -      |
| ENSG00000228410 | 5.13E-15 | -2.63127 | 1 | 1 TCEB1P24      | -      |
| ENSG00000228411 | 5.13E-15 | -2.63127 | 1 | 1 CDY4P         | K00653 |
| ENSG00000228412 | 5.13E-15 | -2.63127 | 1 | 1 RP4-625H18.2  | -      |
| ENSG00000228413 | 5.13E-15 | -2.63127 | 1 | 1 AC024937.2    | -      |
| ENSG00000228415 | 5.13E-15 | -2.63127 | 1 | 1 PTMAP1        | K13784 |
| ENSG00000228417 | 5.13E-15 | -2.63127 | 1 | 1 RP11-549L6.3  | -      |
| ENSG00000228418 | 5.13E-15 | -2.63127 | 1 | 1 CTSLP3        | K01365 |
| ENSG00000228421 | 5.13E-15 | -2.63127 | 1 | 1 AC005013.5    | -      |
| ENSG00000228423 | 5.13E-15 | -2.63127 | 1 | 1 RP4-633I8.4   | -      |
| ENSG00000228426 | 5.13E-15 | -2.63127 | 1 | 1 RP11-402L1.11 | -      |
| ENSG00000228427 | 5.13E-15 | -2.63127 | 1 | 1 RP5-1091N2.9  | -      |
| ENSG00000228429 | 5.13E-15 | -2.63127 | 1 | 1 RP5-859M6.1   | K02889 |
| ENSG00000228430 | 5.13E-15 | -2.63127 | 1 | 1 RP11-15B24.5  | -      |
| ENSG00000228431 | 5.13E-15 | -2.63127 | 1 | 1 ARL5AP3       | -      |
| ENSG00000228432 | 5.13E-15 | -2.63127 | 1 | 1 DHFRP2        | K00287 |
| ENSG00000228433 | 5.13E-15 | -2.63127 | 1 | 1 OR7E23P       | K04257 |
| ENSG00000228437 | 5.13E-15 | -2.63127 | 1 | 1 RP11-400N13.2 | -      |
| ENSG00000228438 | 5.13E-15 | -2.63127 | 1 | 1 RP5-859I17.2  | -      |
| ENSG00000228440 | 5.13E-15 | -2.63127 | 1 | 1 MTND5P6       | K03883 |
| ENSG00000228445 | 5.13E-15 | -2.63127 | 1 | 1 UGT1A2P       | K00699 |
| ENSG00000228450 | 5.13E-15 | -2.63127 | 1 | 1 RP1-154J13.3  | K19409 |
| ENSG00000228453 | 5.13E-15 | -2.63127 | 1 | 1 RPS15AP9      | K02957 |
| ENSG00000228459 | 5.13E-15 | -2.63127 | 1 | 1 CXorf28       | -      |
| ENSG00000228460 | 5.13E-15 | -2.63127 | 1 | 1 CYP2C59P      | K17720 |

|                 |          |          |   |                   |        |
|-----------------|----------|----------|---|-------------------|--------|
| ENSG00000228462 | 5.13E-15 | -2.63127 | 1 | 1 RP11-445N18.3   | K02966 |
| ENSG00000228464 | 5.13E-15 | -2.63127 | 1 | 1 RP11-617O8.1    | -      |
| ENSG00000228465 | 5.13E-15 | -2.63127 | 1 | 1 TRAPPC2P10      | -      |
| ENSG00000228466 | 5.13E-15 | -2.63127 | 1 | 1 TUBB4AP1        | K07375 |
| ENSG00000228467 | 5.13E-15 | -2.63127 | 1 | 1 RP11-402N8.1    | -      |
| ENSG00000228471 | 5.13E-15 | -2.63127 | 1 | 1 AC018865.11     | K14565 |
| ENSG00000228473 | 5.13E-15 | -2.63127 | 1 | 1 LIN28AP2        | -      |
| ENSG00000228476 | 5.13E-15 | -2.63127 | 1 | 1 CSTP1           | K13898 |
| ENSG00000228480 | 5.13E-15 | -2.63127 | 1 | 1 AC130464.1      | -      |
| ENSG00000228481 | 5.13E-15 | -2.63127 | 1 | 1 U51244.2        | -      |
| ENSG00000228482 | 5.13E-15 | -2.63127 | 1 | 1 RP5-859D4.3     | -      |
| ENSG00000228484 | 5.13E-15 | -2.63127 | 1 | 1 RP11-106M7.1    | -      |
| ENSG00000228487 | 5.13E-15 | -2.63127 | 1 | 1 RP13-225O21.2   | -      |
| ENSG00000228488 | 5.13E-15 | -2.63127 | 1 | 1 AC092168.4      | -      |
| ENSG00000228489 | 5.13E-15 | -2.63127 | 1 | 1 RPL21P50        | K02889 |
| ENSG00000228495 | 5.13E-15 | -2.63127 | 1 | 1 LINC01013       | -      |
| ENSG00000228499 | 5.13E-15 | -2.63127 | 1 | 1 TMSB10P1        | K13785 |
| ENSG00000228501 | 5.13E-15 | -2.63127 | 1 | 1 RPL15P18        | K02877 |
| ENSG00000228503 | 5.13E-15 | -2.63127 | 1 | 1 RP11-347D21.2   | -      |
| ENSG00000228504 | 5.13E-15 | -2.63127 | 1 | 1 RP4-586O15.1    | -      |
| ENSG00000228505 | 5.13E-15 | -2.63127 | 1 | 1 AC011897.2      | -      |
| ENSG00000228509 | 5.13E-15 | -2.63127 | 1 | 1 AC006460.2      | -      |
| ENSG00000228512 | 5.13E-15 | -2.63127 | 1 | 1 RP11-281A20.2   | -      |
| ENSG00000228513 | 5.13E-15 | -2.63127 | 1 | 1 AC023271.1      | K09228 |
| ENSG00000228517 | 5.13E-15 | -2.63127 | 1 | 1 CT47A7          | -      |
| ENSG00000228518 | 5.13E-15 | -2.63127 | 1 | 1 SURF6P1         | -      |
| ENSG00000228521 | 5.13E-15 | -2.63127 | 1 | 1 AC099552.3      | -      |
| ENSG00000228522 | 5.13E-15 | -2.63127 | 1 | 1 RP11-236F9.2    | K13402 |
| ENSG00000228523 | 5.13E-15 | -2.63127 | 1 | 1 RP4-763G1.1     | K09512 |
| ENSG00000228526 | 5.13E-15 | -2.63127 | 1 | 1 RP3-510D11.1    | -      |
| ENSG00000228527 | 5.13E-15 | -2.63127 | 1 | 1 RP11-179B15.5   | -      |
| ENSG00000228528 | 5.13E-15 | -2.63127 | 1 | 1 AC068057.1      | -      |
| ENSG00000228530 | 5.13E-15 | -2.63127 | 1 | 1 RP11-567B20.1   | K03948 |
| ENSG00000228532 | 5.13E-15 | -2.63127 | 1 | 1 RP1-241P17.4    | K12160 |
| ENSG00000228534 | 5.13E-15 | -2.63127 | 1 | 1 RP11-95H8.5     | -      |
| ENSG00000228536 | 5.13E-15 | -2.63127 | 1 | 1 RP11-392O17.1   | -      |
| ENSG00000228537 | 5.13E-15 | -2.63127 | 1 | 1 AL353608.1      | -      |
| ENSG00000228538 | 5.13E-15 | -2.63127 | 1 | 1 AC009411.1      | -      |
| ENSG00000228539 | 5.13E-15 | -2.63127 | 1 | 1 RP11-526K17.2   | -      |
| ENSG00000228541 | 5.13E-15 | -2.63127 | 1 | 1 AC093159.1      | -      |
| ENSG00000228543 | 5.13E-15 | -2.63127 | 1 | 1 GS1-519E5.1     | -      |
| ENSG00000228547 | 5.13E-15 | -2.63127 | 1 | 1 OR7E26P         | K04257 |
| ENSG00000228548 | 5.13E-15 | -2.63127 | 1 | 1 ITPKB-AS1       | -      |
| ENSG00000228550 | 5.13E-15 | -2.63127 | 1 | 1 RP11-483M24.2   | -      |
| ENSG00000228551 | 5.13E-15 | -2.63127 | 1 | 1 SNRPGP9         | K11099 |
| ENSG00000228553 | 5.13E-15 | -2.63127 | 1 | 1 RP11-391J2.3    | -      |
| ENSG00000228557 | 5.13E-15 | -2.63127 | 1 | 1 HSPA8P17        | -      |
| ENSG00000228559 | 5.13E-15 | -2.63127 | 1 | 1 RP3-340B19.3    | -      |
| ENSG00000228561 | 5.13E-15 | -2.63127 | 1 | 1 RP11-114M1.1    | -      |
| ENSG00000228563 | 5.13E-15 | -2.63127 | 1 | 1 AL133247.2      | -      |
| ENSG00000228564 | 5.13E-15 | -2.63127 | 1 | 1 LINC01005       | -      |
| ENSG00000228566 | 5.13E-15 | -2.63127 | 1 | 1 RP11-170M17.1   | -      |
| ENSG00000228567 | 5.13E-15 | -2.63127 | 1 | 1 VN1R4           | K04614 |
| ENSG00000228568 | 5.13E-15 | -2.63127 | 1 | 1 AC006461.2      | K02957 |
| ENSG00000228569 | 5.13E-15 | -2.63127 | 1 | 1 AC073133.2      | -      |
| ENSG00000228571 | 5.13E-15 | -2.63127 | 1 | 1 HSFY7P          | -      |
| ENSG00000228572 | 5.13E-15 | -2.63127 | 1 | 1 LL0YNC03-29C1.1 | -      |
| ENSG00000228573 | 5.13E-15 | -2.63127 | 1 | 1 RP11-279N8.1    | -      |

|                 |          |          |   |                 |        |
|-----------------|----------|----------|---|-----------------|--------|
| ENSG00000228577 | 5.13E-15 | -2.63127 | 1 | 1 AC010731.2    | -      |
| ENSG00000228578 | 5.13E-15 | -2.63127 | 1 | 1 TUBB1P2       | K07375 |
| ENSG00000228585 | 5.13E-15 | -2.63127 | 1 | 1 AC073143.1    | -      |
| ENSG00000228586 | 5.13E-15 | -2.63127 | 1 | 1 AC005042.5    | -      |
| ENSG00000228587 | 5.13E-15 | -2.63127 | 1 | 1 RP1-41P2.7    | -      |
| ENSG00000228590 | 5.13E-15 | -2.63127 | 1 | 1 AC007381.3    | -      |
| ENSG00000228592 | 5.13E-15 | -2.63127 | 1 | 1 AP000459.4    | -      |
| ENSG00000228593 | 5.13E-15 | -2.63127 | 1 | 1 CFTRP1        | K05031 |
| ENSG00000228594 | 5.13E-15 | -2.63127 | 1 | 1 C1orf233      | -      |
| ENSG00000228595 | 5.13E-15 | -2.63127 | 1 | 1 PAICSP2       | K01587 |
| ENSG00000228596 | 5.13E-15 | -2.63127 | 1 | 1 AC013436.6    | -      |
| ENSG00000228597 | 5.13E-15 | -2.63127 | 1 | 1 MTND4P1       | -      |
| ENSG00000228598 | 5.13E-15 | -2.63127 | 1 | 1 MACC1-AS1     | -      |
| ENSG00000228599 | 5.13E-15 | -2.63127 | 1 | 1 RPL7P52       | K02937 |
| ENSG00000228600 | 5.13E-15 | -2.63127 | 1 | 1 POLR2CP       | K03011 |
| ENSG00000228601 | 5.13E-15 | -2.63127 | 1 | 1 RPL39P        | K02924 |
| ENSG00000228607 | 5.13E-15 | -2.63127 | 1 | 1 CLDN25        | K06087 |
| ENSG00000228610 | 5.13E-15 | -2.63127 | 1 | 1 GS1-590J15.1  | -      |
| ENSG00000228611 | 5.13E-15 | -2.63127 | 1 | 1 HNF4GP1       | K08037 |
| ENSG00000228613 | 5.13E-15 | -2.63127 | 1 | 1 AC144450.1    | -      |
| ENSG00000228615 | 5.13E-15 | -2.63127 | 1 | 1 AC093166.3    | K11506 |
| ENSG00000228616 | 5.13E-15 | -2.63127 | 1 | 1 RP11-66N11.7  | -      |
| ENSG00000228617 | 5.13E-15 | -2.63127 | 1 | 1 RP11-157L3.2  | -      |
| ENSG00000228618 | 5.13E-15 | -2.63127 | 1 | 1 AC012462.3    | -      |
| ENSG00000228622 | 5.13E-15 | -2.63127 | 1 | 1 RP1-302D9.1   | -      |
| ENSG00000228623 | 5.13E-15 | -2.63127 | 1 | 1 ZNF883        | -      |
| ENSG00000228626 | 5.13E-15 | -2.63127 | 1 | 1 RP11-495P10.9 | -      |
| ENSG00000228627 | 5.13E-15 | -2.63127 | 1 | 1 GS1-278J22.2  | -      |
| ENSG00000228629 | 5.13E-15 | -2.63127 | 1 | 1 AC092295.4    | -      |
| ENSG00000228634 | 5.13E-15 | -2.63127 | 1 | 1 RP4-534N18.2  | -      |
| ENSG00000228636 | 5.13E-15 | -2.63127 | 1 | 1 RP5-1051H14.2 | -      |
| ENSG00000228639 | 5.13E-15 | -2.63127 | 1 | 1 AC005152.3    | -      |
| ENSG00000228643 | 5.13E-15 | -2.63127 | 1 | 1 AC079779.4    | -      |
| ENSG00000228645 | 5.13E-15 | -2.63127 | 1 | 1 PHKG1P2       | K00871 |
| ENSG00000228646 | 5.13E-15 | -2.63127 | 1 | 1 RPL31P13      | K02910 |
| ENSG00000228648 | 5.13E-15 | -2.63127 | 1 | 1 RP11-568A7.2  | -      |
| ENSG00000228650 | 5.13E-15 | -2.63127 | 1 | 1 AC008940.1    | -      |
| ENSG00000228651 | 5.13E-15 | -2.63127 | 1 | 1 RP11-556E13.1 | -      |
| ENSG00000228655 | 5.13E-15 | -2.63127 | 1 | 1 AC096558.1    | -      |
| ENSG00000228656 | 5.13E-15 | -2.63127 | 1 | 1 MYO5BP3       | K10357 |
| ENSG00000228657 | 5.13E-15 | -2.63127 | 1 | 1 RP11-170J3.2  | K02893 |
| ENSG00000228658 | 5.13E-15 | -2.63127 | 1 | 1 RP11-791O21.5 | -      |
| ENSG00000228659 | 5.13E-15 | -2.63127 | 1 | 1 RP1-23K20.2   | -      |
| ENSG00000228660 | 5.13E-15 | -2.63127 | 1 | 1 VN1R35P       | K04614 |
| ENSG00000228661 | 5.13E-15 | -2.63127 | 1 | 1 AC090587.5    | -      |
| ENSG00000228663 | 5.13E-15 | -2.63127 | 1 | 1 PSMD10P1      | K06694 |
| ENSG00000228664 | 5.13E-15 | -2.63127 | 1 | 1 RP11-416K24.1 | -      |
| ENSG00000228665 | 5.13E-15 | -2.63127 | 1 | 1 RP11-20O24.1  | K02978 |
| ENSG00000228666 | 5.13E-15 | -2.63127 | 1 | 1 KRT18P1       | K07604 |
| ENSG00000228667 | 5.13E-15 | -2.63127 | 1 | 1 RP11-129O7.2  | -      |
| ENSG00000228668 | 5.13E-15 | -2.63127 | 1 | 1 TRGV5P        | -      |
| ENSG00000228669 | 5.13E-15 | -2.63127 | 1 | 1 LINC00448     | -      |
| ENSG00000228670 | 5.13E-15 | -2.63127 | 1 | 1 NANOGP2       | K10164 |
| ENSG00000228674 | 5.13E-15 | -2.63127 | 1 | 1 CTB-147C22.3  | K03767 |
| ENSG00000228675 | 5.13E-15 | -2.63127 | 1 | 1 AC006482.1    | -      |
| ENSG00000228680 | 5.13E-15 | -2.63127 | 1 | 1 AC004692.4    | -      |
| ENSG00000228681 | 5.13E-15 | -2.63127 | 1 | 1 AC008072.1    | K02977 |
| ENSG00000228682 | 5.13E-15 | -2.63127 | 1 | 1 RP11-439L8.3  | -      |

|                 |          |          |   |                 |        |
|-----------------|----------|----------|---|-----------------|--------|
| ENSG00000228683 | 5.13E-15 | -2.63127 | 1 | 1 RP11-31E13.2  | -      |
| ENSG00000228685 | 5.13E-15 | -2.63127 | 1 | 1 RP11-336A10.7 | -      |
| ENSG00000228687 | 5.13E-15 | -2.63127 | 1 | 1 RP3-419C19.3  | -      |
| ENSG00000228688 | 5.13E-15 | -2.63127 | 1 | 1 COL11A2P1     | K06236 |
| ENSG00000228689 | 5.13E-15 | -2.63127 | 1 | 1 RP3-335N17.2  | -      |
| ENSG00000228692 | 5.13E-15 | -2.63127 | 1 | 1 RP5-826L7.1   | -      |
| ENSG00000228694 | 5.13E-15 | -2.63127 | 1 | 1 MTND4P18      | K03881 |
| ENSG00000228697 | 5.13E-15 | -2.63127 | 1 | 1 RP5-968D22.1  | -      |
| ENSG00000228703 | 5.13E-15 | -2.63127 | 1 | 1 RP5-1160K1.6  | -      |
| ENSG00000228704 | 5.13E-15 | -2.63127 | 1 | 1 RP11-138M12.1 | -      |
| ENSG00000228708 | 5.13E-15 | -2.63127 | 1 | 1 AL109763.1    | -      |
| ENSG00000228711 | 5.13E-15 | -2.63127 | 1 | 1 AC004006.2    | K06172 |
| ENSG00000228714 | 5.13E-15 | -2.63127 | 1 | 1 RP11-284G10.1 | -      |
| ENSG00000228721 | 5.13E-15 | -2.63127 | 1 | 1 AC016909.2    | K03111 |
| ENSG00000228723 | 5.13E-15 | -2.63127 | 1 | 1 SRGAP3-AS2    | -      |
| ENSG00000228725 | 5.13E-15 | -2.63127 | 1 | 1 MTND2P12      | K17985 |
| ENSG00000228727 | 5.13E-15 | -2.63127 | 1 | 1 SAPCD1        | -      |
| ENSG00000228728 | 5.13E-15 | -2.63127 | 1 | 1 RP11-316K19.3 | K03767 |
| ENSG00000228730 | 5.13E-15 | -2.63127 | 1 | 1 RP11-95L3.2   | -      |
| ENSG00000228733 | 5.13E-15 | -2.63127 | 1 | 1 AC015815.8    | K00237 |
| ENSG00000228734 | 5.13E-15 | -2.63127 | 1 | 1 RP11-335E6.3  | -      |
| ENSG00000228735 | 5.13E-15 | -2.63127 | 1 | 1 GS1-18A18.2   | -      |
| ENSG00000228739 | 5.13E-15 | -2.63127 | 1 | 1 RP11-218I7.2  | -      |
| ENSG00000228740 | 5.13E-15 | -2.63127 | 1 | 1 AC136896.1    | -      |
| ENSG00000228741 | 5.13E-15 | -2.63127 | 1 | 1 RP11-309I15.1 | -      |
| ENSG00000228744 | 5.13E-15 | -2.63127 | 1 | 1 RPS3AP30      | K02984 |
| ENSG00000228745 | 5.13E-15 | -2.63127 | 1 | 1 CTSLP5        | K01365 |
| ENSG00000228750 | 5.13E-15 | -2.63127 | 1 | 1 RP11-242F24.1 | -      |
| ENSG00000228751 | 5.13E-15 | -2.63127 | 1 | 1 AC004022.8    | -      |
| ENSG00000228753 | 5.13E-15 | -2.63127 | 1 | 1 EIF4BP2       | K03258 |
| ENSG00000228754 | 5.13E-15 | -2.63127 | 1 | 1 RP11-534L6.3  | K02872 |
| ENSG00000228755 | 5.13E-15 | -2.63127 | 1 | 1 PABPC1P8      | K13126 |
| ENSG00000228757 | 5.13E-15 | -2.63127 | 1 | 1 AB019438.66   | K06856 |
| ENSG00000228763 | 5.13E-15 | -2.63127 | 1 | 1 AC010095.5    | -      |
| ENSG00000228764 | 5.13E-15 | -2.63127 | 1 | 1 ZNF885P       | -      |
| ENSG00000228767 | 5.13E-15 | -2.63127 | 1 | 1 KRT8P18       | K07605 |
| ENSG00000228769 | 5.13E-15 | -2.63127 | 1 | 1 ABCF2P2       | K06185 |
| ENSG00000228770 | 5.13E-15 | -2.63127 | 1 | 1 AC007327.6    | -      |
| ENSG00000228771 | 5.13E-15 | -2.63127 | 1 | 1 RP11-552J9.1  | -      |
| ENSG00000228772 | 5.13E-15 | -2.63127 | 1 | 1 RP1-309H15.2  | -      |
| ENSG00000228775 | 5.13E-15 | -2.63127 | 1 | 1 WEE2-AS1      | -      |
| ENSG00000228776 | 5.13E-15 | -2.63127 | 1 | 1 RP11-319C21.1 | K02889 |
| ENSG00000228777 | 5.13E-15 | -2.63127 | 1 | 1 RP11-282C5.1  | -      |
| ENSG00000228778 | 5.13E-15 | -2.63127 | 1 | 1 RP11-129J12.1 | -      |
| ENSG00000228779 | 5.13E-15 | -2.63127 | 1 | 1 Z69666.2      | -      |
| ENSG00000228780 | 5.13E-15 | -2.63127 | 1 | 1 RP1-50A13.1   | K02987 |
| ENSG00000228781 | 5.13E-15 | -2.63127 | 1 | 1 RP11-336N8.3  | K02889 |
| ENSG00000228783 | 5.13E-15 | -2.63127 | 1 | 1 RP11-147I11.1 | K11253 |
| ENSG00000228784 | 5.13E-15 | -2.63127 | 1 | 1 LINC00954     | -      |
| ENSG00000228786 | 5.13E-15 | -2.63127 | 1 | 1 LINC00266-4P  | -      |
| ENSG00000228787 | 5.13E-15 | -2.63127 | 1 | 1 NLGN4Y-AS1    | -      |
| ENSG00000228789 | 5.13E-15 | -2.63127 | 1 | 1 HCG22         | -      |
| ENSG00000228790 | 5.13E-15 | -2.63127 | 1 | 1 AC098784.1    | -      |
| ENSG00000228800 | 5.13E-15 | -2.63127 | 1 | 1 RP11-253D19.1 | -      |
| ENSG00000228803 | 5.13E-15 | -2.63127 | 1 | 1 AC073072.6    | K00412 |
| ENSG00000228804 | 5.13E-15 | -2.63127 | 1 | 1 RP11-211G3.3  | K15618 |
| ENSG00000228806 | 5.13E-15 | -2.63127 | 1 | 1 AC092628.3    | -      |
| ENSG00000228807 | 5.13E-15 | -2.63127 | 1 | 1 MRPS18CP6     | K02963 |

|                 |          |          |   |                  |        |
|-----------------|----------|----------|---|------------------|--------|
| ENSG00000228809 | 5.13E-15 | -2.63127 | 1 | 1 RP4-705D16.3   | -      |
| ENSG00000228814 | 5.13E-15 | -2.63127 | 1 | 1 RP11-119H12.5  | K12741 |
| ENSG00000228815 | 5.13E-15 | -2.63127 | 1 | 1 MARK2P13       | -      |
| ENSG00000228819 | 5.13E-15 | -2.63127 | 1 | 1 RP1-305B16.3   | K09881 |
| ENSG00000228820 | 5.13E-15 | -2.63127 | 1 | 1 RPSAP1         | K02998 |
| ENSG00000228823 | 5.13E-15 | -2.63127 | 1 | 1 RP11-293F5.8   | K16549 |
| ENSG00000228825 | 5.13E-15 | -2.63127 | 1 | 1 LAMTOR3P1      | K04370 |
| ENSG00000228826 | 5.13E-15 | -2.63127 | 1 | 1 RP11-344P13.4  | -      |
| ENSG00000228827 | 5.13E-15 | -2.63127 | 1 | 1 RP11-234P3.2   | K19028 |
| ENSG00000228830 | 5.13E-15 | -2.63127 | 1 | 1 RP4-781K5.2    | -      |
| ENSG00000228833 | 5.13E-15 | -2.63127 | 1 | 1 RP5-1014O16.9  | -      |
| ENSG00000228835 | 5.13E-15 | -2.63127 | 1 | 1 AC012123.1     | K10451 |
| ENSG00000228836 | 5.13E-15 | -2.63127 | 1 | 1 CT45A4         | -      |
| ENSG00000228837 | 5.13E-15 | -2.63127 | 1 | 1 CBX3P6         | K11586 |
| ENSG00000228839 | 5.13E-15 | -2.63127 | 1 | 1 RP3-400N23.6   | -      |
| ENSG00000228842 | 5.13E-15 | -2.63127 | 1 | 1 PCDH9-AS2      | -      |
| ENSG00000228843 | 5.13E-15 | -2.63127 | 1 | 1 RP11-112J3.15  | -      |
| ENSG00000228844 | 5.13E-15 | -2.63127 | 1 | 1 RP11-467I20.3  | K02949 |
| ENSG00000228847 | 5.13E-15 | -2.63127 | 1 | 1 ATP5G2P4       | K02128 |
| ENSG00000228848 | 5.13E-15 | -2.63127 | 1 | 1 AC105402.2     | K02969 |
| ENSG00000228850 | 5.13E-15 | -2.63127 | 1 | 1 CDY12P         | -      |
| ENSG00000228851 | 5.13E-15 | -2.63127 | 1 | 1 RP11-1217F2.10 | K02262 |
| ENSG00000228853 | 5.13E-15 | -2.63127 | 1 | 1 NEGR1-IT1      | -      |
| ENSG00000228855 | 5.13E-15 | -2.63127 | 1 | 1 RP3-433G13.1   | -      |
| ENSG00000228856 | 5.13E-15 | -2.63127 | 1 | 1 USP17L30       | K11845 |
| ENSG00000228857 | 5.13E-15 | -2.63127 | 1 | 1 AC104653.1     | -      |
| ENSG00000228858 | 5.13E-15 | -2.63127 | 1 | 1 RP11-95K23.5   | -      |
| ENSG00000228860 | 5.13E-15 | -2.63127 | 1 | 1 RP11-565H13.3  | -      |
| ENSG00000228861 | 5.13E-15 | -2.63127 | 1 | 1 RPL23AP12      | K02893 |
| ENSG00000228862 | 5.13E-15 | -2.63127 | 1 | 1 RP11-91I20.3   | -      |
| ENSG00000228863 | 5.13E-15 | -2.63127 | 1 | 1 RP11-404F10.2  | -      |
| ENSG00000228865 | 5.13E-15 | -2.63127 | 1 | 1 RP11-463P17.3  | -      |
| ENSG00000228868 | 5.13E-15 | -2.63127 | 1 | 1 MYLKP1         | K00907 |
| ENSG00000228869 | 5.13E-15 | -2.63127 | 1 | 1 COX4I1P2       | K06115 |
| ENSG00000228871 | 5.13E-15 | -2.63127 | 1 | 1 MEP1AP1        | K01395 |
| ENSG00000228872 | 5.13E-15 | -2.63127 | 1 | 1 AC096664.2     | K01647 |
| ENSG00000228874 | 5.13E-15 | -2.63127 | 1 | 1 AC090954.5     | K02974 |
| ENSG00000228876 | 5.13E-15 | -2.63127 | 1 | 1 AC010745.2     | -      |
| ENSG00000228877 | 5.13E-15 | -2.63127 | 1 | 1 RP11-473E2.4   | -      |
| ENSG00000228879 | 5.13E-15 | -2.63127 | 1 | 1 RP11-439E19.6  | K02917 |
| ENSG00000228882 | 5.13E-15 | -2.63127 | 1 | 1 C1CP9          | K16941 |
| ENSG00000228884 | 5.13E-15 | -2.63127 | 1 | 1 AC104634.2     | K02893 |
| ENSG00000228886 | 5.13E-15 | -2.63127 | 1 | 1 RP11-290D2.3   | -      |
| ENSG00000228888 | 5.13E-15 | -2.63127 | 1 | 1 RP4-764O22.2   | -      |
| ENSG00000228890 | 5.13E-15 | -2.63127 | 1 | 1 TTTY21         | -      |
| ENSG00000228897 | 5.13E-15 | -2.63127 | 1 | 1 CTD-2021A8.2   | -      |
| ENSG00000228898 | 5.13E-15 | -2.63127 | 1 | 1 AC012365.3     | -      |
| ENSG00000228901 | 5.13E-15 | -2.63127 | 1 | 1 HMGN2P36       | K11300 |
| ENSG00000228902 | 5.13E-15 | -2.63127 | 1 | 1 ST6GALNAC2P1   | -      |
| ENSG00000228909 | 5.13E-15 | -2.63127 | 1 | 1 AC008281.1     | -      |
| ENSG00000228914 | 5.13E-15 | -2.63127 | 1 | 1 OR1H1P         | K04257 |
| ENSG00000228918 | 5.13E-15 | -2.63127 | 1 | 1 GS1-122H1.2    | -      |
| ENSG00000228920 | 5.13E-15 | -2.63127 | 1 | 1 AL162415.1     | -      |
| ENSG00000228922 | 5.13E-15 | -2.63127 | 1 | 1 RP13-210D15.1  | -      |
| ENSG00000228923 | 5.13E-15 | -2.63127 | 1 | 1 AP000355.2     | -      |
| ENSG00000228927 | 5.13E-15 | -2.63127 | 1 | 1 TSPY3          | K11284 |
| ENSG00000228928 | 5.13E-15 | -2.63127 | 1 | 1 AC002069.5     | K15043 |
| ENSG00000228930 | 5.13E-15 | -2.63127 | 1 | 1 MTCO1P3        | K02256 |

|                 |          |          |   |                  |        |
|-----------------|----------|----------|---|------------------|--------|
| ENSG00000228935 | 5.13E-15 | -2.63127 | 1 | 1 RP11-189G24.2  | _      |
| ENSG00000228937 | 5.13E-15 | -2.63127 | 1 | 1 AC005539.2     | K11660 |
| ENSG00000228938 | 5.13E-15 | -2.63127 | 1 | 1 SNRPD2P1       | K11096 |
| ENSG00000228939 | 5.13E-15 | -2.63127 | 1 | 1 AKT3-IT1       | _      |
| ENSG00000228941 | 5.13E-15 | -2.63127 | 1 | 1 UBE3AP2        | K10587 |
| ENSG00000228943 | 5.13E-15 | -2.63127 | 1 | 1 RP5-1053E7.2   | K03948 |
| ENSG00000228944 | 5.13E-15 | -2.63127 | 1 | 1 AC004485.3     | _      |
| ENSG00000228945 | 5.13E-15 | -2.63127 | 1 | 1 CLUHP2         | _      |
| ENSG00000228948 | 5.13E-15 | -2.63127 | 1 | 1 SLC25A6P5      | _      |
| ENSG00000228951 | 5.13E-15 | -2.63127 | 1 | 1 RP11-336A10.4  | _      |
| ENSG00000228952 | 5.13E-15 | -2.63127 | 1 | 1 RP11-567G11.1  | _      |
| ENSG00000228953 | 5.13E-15 | -2.63127 | 1 | 1 AC006026.12    | _      |
| ENSG00000228955 | 5.13E-15 | -2.63127 | 1 | 1 RP11-452J6.2   | K02936 |
| ENSG00000228956 | 5.13E-15 | -2.63127 | 1 | 1 AC144521.1     | _      |
| ENSG00000228957 | 5.13E-15 | -2.63127 | 1 | 1 RP11-23J9.3    | _      |
| ENSG00000228958 | 5.13E-15 | -2.63127 | 1 | 1 PIGPP3         | K03861 |
| ENSG00000228959 | 5.13E-15 | -2.63127 | 1 | 1 RP5-1121H13.3  | _      |
| ENSG00000228961 | 5.13E-15 | -2.63127 | 1 | 1 AP000282.3     | _      |
| ENSG00000228962 | 5.13E-15 | -2.63127 | 1 | 1 HCG23          | _      |
| ENSG00000228963 | 5.13E-15 | -2.63127 | 1 | 1 OR7E93P        | K04257 |
| ENSG00000228965 | 5.13E-15 | -2.63127 | 1 | 1 RP11-1007I13.2 | K02998 |
| ENSG00000228966 | 5.13E-15 | -2.63127 | 1 | 1 HOMER2P1       | K15010 |
| ENSG00000228968 | 5.13E-15 | -2.63127 | 1 | 1 AC096554.1     | _      |
| ENSG00000228970 | 5.13E-15 | -2.63127 | 1 | 1 UBTFL6         | _      |
| ENSG00000228971 | 5.13E-15 | -2.63127 | 1 | 1 RP11-286B14.1  | _      |
| ENSG00000228973 | 5.13E-15 | -2.63127 | 1 | 1 AC009955.8     | _      |
| ENSG00000228974 | 5.13E-15 | -2.63127 | 1 | 1 AC006483.5     | _      |
| ENSG00000228979 | 5.13E-15 | -2.63127 | 1 | 1 CTD-2501B8.5   | K03767 |
| ENSG00000228980 | 5.13E-15 | -2.63127 | 1 | 1 RP11-702L6.4   | _      |
| ENSG00000228981 | 5.13E-15 | -2.63127 | 1 | 1 RP11-364L4.1   | K02981 |
| ENSG00000228982 | 5.13E-15 | -2.63127 | 1 | 1 RP11-107G24.3  | _      |
| ENSG00000228984 | 5.13E-15 | -2.63127 | 1 | 1 RP11-101E19.8  | K09228 |
| ENSG00000228985 | 5.13E-15 | -2.63127 | 1 | 1 TRDD3          | _      |
| ENSG00000228986 | 5.13E-15 | -2.63127 | 1 | 1 RP13-228J13.8  | _      |
| ENSG00000228988 | 5.13E-15 | -2.63127 | 1 | 1 RP4-677H15.4   | _      |
| ENSG00000228991 | 5.13E-15 | -2.63127 | 1 | 1 RP11-318K12.1  | K17299 |
| ENSG00000228992 | 5.13E-15 | -2.63127 | 1 | 1 RPL5P32        | K02932 |
| ENSG00000228995 | 5.13E-15 | -2.63127 | 1 | 1 MTND1P9        | K03878 |
| ENSG00000228997 | 5.13E-15 | -2.63127 | 1 | 1 RP1-186E20.1   | _      |
| ENSG00000228999 | 5.13E-15 | -2.63127 | 1 | 1 AC068490.1     | _      |
| ENSG00000229000 | 5.13E-15 | -2.63127 | 1 | 1 SEPT7P8        | K16944 |
| ENSG00000229001 | 5.13E-15 | -2.63127 | 1 | 1 ACTBP14        | K05692 |
| ENSG00000229002 | 5.13E-15 | -2.63127 | 1 | 1 RP11-666A1.4   | _      |
| ENSG00000229005 | 5.13E-15 | -2.63127 | 1 | 1 HNF4A-AS1      | _      |
| ENSG00000229009 | 5.13E-15 | -2.63127 | 1 | 1 TMPRSS11GP     | K18769 |
| ENSG00000229010 | 5.13E-15 | -2.63127 | 1 | 1 RP5-979D14.1   | _      |
| ENSG00000229011 | 5.13E-15 | -2.63127 | 1 | 1 LINC01038      | _      |
| ENSG00000229012 | 5.13E-15 | -2.63127 | 1 | 1 GS1-542M4.4    | _      |
| ENSG00000229013 | 5.13E-15 | -2.63127 | 1 | 1 AC083939.1     | K17265 |
| ENSG00000229014 | 5.13E-15 | -2.63127 | 1 | 1 RPL30P13       | K02908 |
| ENSG00000229015 | 5.13E-15 | -2.63127 | 1 | 1 RP11-265D19.6  | _      |
| ENSG00000229017 | 5.13E-15 | -2.63127 | 1 | 1 RP11-439L18.3  | _      |
| ENSG00000229019 | 5.13E-15 | -2.63127 | 1 | 1 RP11-88I18.3   | _      |
| ENSG00000229022 | 5.13E-15 | -2.63127 | 1 | 1 RP11-553N16.1  | K02934 |
| ENSG00000229023 | 5.13E-15 | -2.63127 | 1 | 1 AC067945.3     | K07874 |
| ENSG00000229025 | 5.13E-15 | -2.63127 | 1 | 1 AP001595.1     | _      |
| ENSG00000229027 | 5.13E-15 | -2.63127 | 1 | 1 HSFY1P1        | _      |
| ENSG00000229029 | 5.13E-15 | -2.63127 | 1 | 1 RP11-408A13.1  | _      |

|                 |          |          |   |                   |        |
|-----------------|----------|----------|---|-------------------|--------|
| ENSG00000229030 | 5.13E-15 | -2.63127 | 1 | 1 RP11-402P6.6    | K03948 |
| ENSG00000229031 | 5.13E-15 | -2.63127 | 1 | 1 RP11-666G4.1    | K02256 |
| ENSG00000229032 | 5.13E-15 | -2.63127 | 1 | 1 RP11-91A18.1    | K02976 |
| ENSG00000229035 | 5.13E-15 | -2.63127 | 1 | 1 SPRR2C          | -      |
| ENSG00000229037 | 5.13E-15 | -2.63127 | 1 | 1 RP11-272G22.3   | K02911 |
| ENSG00000229042 | 5.13E-15 | -2.63127 | 1 | 1 RP1-232N11.2    | -      |
| ENSG00000229046 | 5.13E-15 | -2.63127 | 1 | 1 HMGN1P2         | K11299 |
| ENSG00000229047 | 5.13E-15 | -2.63127 | 1 | 1 AF127577.10     | -      |
| ENSG00000229051 | 5.13E-15 | -2.63127 | 1 | 1 RP5-952N6.1     | -      |
| ENSG00000229054 | 5.13E-15 | -2.63127 | 1 | 1 AC074338.4      | -      |
| ENSG00000229055 | 5.13E-15 | -2.63127 | 1 | 1 AC034110.1      | -      |
| ENSG00000229056 | 5.13E-15 | -2.63127 | 1 | 1 AC020571.3      | -      |
| ENSG00000229057 | 5.13E-15 | -2.63127 | 1 | 1 RP11-106A1.3    | K02984 |
| ENSG00000229060 | 5.13E-15 | -2.63127 | 1 | 1 RP11-20P5.2     | -      |
| ENSG00000229063 | 5.13E-15 | -2.63127 | 1 | 1 TRBV23OR9-2     | -      |
| ENSG00000229064 | 5.13E-15 | -2.63127 | 1 | 1 RP11-746P2.5    | -      |
| ENSG00000229065 | 5.13E-15 | -2.63127 | 1 | 1 RP11-80I15.4    | -      |
| ENSG00000229066 | 5.13E-15 | -2.63127 | 1 | 1 AC096649.3      | -      |
| ENSG00000229067 | 5.13E-15 | -2.63127 | 1 | 1 RP11-91I11.1    | K02924 |
| ENSG00000229068 | 5.13E-15 | -2.63127 | 1 | 1 TMPOP1          | -      |
| ENSG00000229072 | 5.13E-15 | -2.63127 | 1 | 1 HMGN2P24        | K11300 |
| ENSG00000229079 | 5.13E-15 | -2.63127 | 1 | 1 CR848007.5      | K09228 |
| ENSG00000229080 | 5.13E-15 | -2.63127 | 1 | 1 RP11-291J9.2    | -      |
| ENSG00000229083 | 5.13E-15 | -2.63127 | 1 | 1 PSMA6P2         | K02730 |
| ENSG00000229084 | 5.13E-15 | -2.63127 | 1 | 1 LINC00226       | -      |
| ENSG00000229086 | 5.13E-15 | -2.63127 | 1 | 1 C21orf54        | -      |
| ENSG00000229087 | 5.13E-15 | -2.63127 | 1 | 1 RP11-32P22.1    | K02976 |
| ENSG00000229088 | 5.13E-15 | -2.63127 | 1 | 1 MTND1P10        | K08857 |
| ENSG00000229089 | 5.13E-15 | -2.63127 | 1 | 1 ANKRD20A8P      | K17299 |
| ENSG00000229090 | 5.13E-15 | -2.63127 | 1 | 1 RP1-232L22__A.1 | K09228 |
| ENSG00000229091 | 5.13E-15 | -2.63127 | 1 | 1 HSPA8P8         | K03283 |
| ENSG00000229093 | 5.13E-15 | -2.63127 | 1 | 1 OR51AB1P        | -      |
| ENSG00000229101 | 5.13E-15 | -2.63127 | 1 | 1 TCEB1P20        | K03872 |
| ENSG00000229102 | 5.13E-15 | -2.63127 | 1 | 1 RP11-360P21.2   | -      |
| ENSG00000229104 | 5.13E-15 | -2.63127 | 1 | 1 YY1P2           | K09201 |
| ENSG00000229106 | 5.13E-15 | -2.63127 | 1 | 1 RP11-4M23.2     | K10478 |
| ENSG00000229108 | 5.13E-15 | -2.63127 | 1 | 1 AC005550.4      | -      |
| ENSG00000229109 | 5.13E-15 | -2.63127 | 1 | 1 RP11-439K3.1    | -      |
| ENSG00000229110 | 5.13E-15 | -2.63127 | 1 | 1 AC006355.3      | K12741 |
| ENSG00000229112 | 5.13E-15 | -2.63127 | 1 | 1 RP11-690C23.3   | K07752 |
| ENSG00000229115 | 5.13E-15 | -2.63127 | 1 | 1 RP11-417B4.3    | K12624 |
| ENSG00000229116 | 5.13E-15 | -2.63127 | 1 | 1 RP11-20J15.3    | -      |
| ENSG00000229118 | 5.13E-15 | -2.63127 | 1 | 1 AC068491.2      | -      |
| ENSG00000229120 | 5.13E-15 | -2.63127 | 1 | 1 CYCSP4          | K08738 |
| ENSG00000229129 | 5.13E-15 | -2.63127 | 1 | 1 ACTG1P2         | K05692 |
| ENSG00000229131 | 5.13E-15 | -2.63127 | 1 | 1 AC016710.1      | -      |
| ENSG00000229133 | 5.13E-15 | -2.63127 | 1 | 1 RPS7P4          | K02993 |
| ENSG00000229137 | 5.13E-15 | -2.63127 | 1 | 1 RP11-101P17.11  | -      |
| ENSG00000229138 | 5.13E-15 | -2.63127 | 1 | 1 CDY6P           | K00653 |
| ENSG00000229140 | 5.13E-15 | -2.63127 | 1 | 1 CCDC26          | -      |
| ENSG00000229142 | 5.13E-15 | -2.63127 | 1 | 1 HCG4P8          | K06751 |
| ENSG00000229143 | 5.13E-15 | -2.63127 | 1 | 1 AC009480.4      | K02898 |
| ENSG00000229145 | 5.13E-15 | -2.63127 | 1 | 1 ACTBP1          | K05692 |
| ENSG00000229146 | 5.13E-15 | -2.63127 | 1 | 1 SNX18P5         | K17923 |
| ENSG00000229147 | 5.13E-15 | -2.63127 | 1 | 1 SMPD4P2         | K12353 |
| ENSG00000229150 | 5.13E-15 | -2.63127 | 1 | 1 CRYGEP          | -      |
| ENSG00000229151 | 5.13E-15 | -2.63127 | 1 | 1 RP11-348F1.3    | -      |
| ENSG00000229154 | 5.13E-15 | -2.63127 | 1 | 1 KCNQ5-AS1       | -      |

|                 |          |          |   |                  |        |
|-----------------|----------|----------|---|------------------|--------|
| ENSG00000229155 | 5.13E-15 | -2.63127 | 1 | 1 RP11-528A4.2   | -      |
| ENSG00000229156 | 5.13E-15 | -2.63127 | 1 | 1 RP11-250H24.2  | -      |
| ENSG00000229159 | 5.13E-15 | -2.63127 | 1 | 1 TSPY23P        | -      |
| ENSG00000229163 | 5.13E-15 | -2.63127 | 1 | 1 NAP1L1P2       | K11279 |
| ENSG00000229164 | 5.13E-15 | -2.63127 | 1 | 1 TRAC           | -      |
| ENSG00000229165 | 5.13E-15 | -2.63127 | 1 | 1 GDI2P1         | K17255 |
| ENSG00000229169 | 5.13E-15 | -2.63127 | 1 | 1 RP11-247I13.6  | -      |
| ENSG00000229172 | 5.13E-15 | -2.63127 | 1 | 1 AC073065.3     | K04613 |
| ENSG00000229173 | 5.13E-15 | -2.63127 | 1 | 1 AC108059.4     | K00797 |
| ENSG00000229175 | 5.13E-15 | -2.63127 | 1 | 1 LINC00382      | -      |
| ENSG00000229177 | 5.13E-15 | -2.63127 | 1 | 1 AC008154.5     | -      |
| ENSG00000229182 | 5.13E-15 | -2.63127 | 1 | 1 MRPS16P1       | K02959 |
| ENSG00000229183 | 5.13E-15 | -2.63127 | 1 | 1 PGA4           | K06002 |
| ENSG00000229188 | 5.13E-15 | -2.63127 | 1 | 1 RP4-553F4.2    | -      |
| ENSG00000229190 | 5.13E-15 | -2.63127 | 1 | 1 RP11-390B4.3   | -      |
| ENSG00000229192 | 5.13E-15 | -2.63127 | 1 | 1 AC004870.3     | -      |
| ENSG00000229195 | 5.13E-15 | -2.63127 | 1 | 1 AC009495.4     | -      |
| ENSG00000229196 | 5.13E-15 | -2.63127 | 1 | 1 RP11-775D22.2  | -      |
| ENSG00000229197 | 5.13E-15 | -2.63127 | 1 | 1 RP11-227H15.7  | K02957 |
| ENSG00000229198 | 5.13E-15 | -2.63127 | 1 | 1 RP11-12A20.4   | -      |
| ENSG00000229200 | 5.13E-15 | -2.63127 | 1 | 1 TRBV7-8        | -      |
| ENSG00000229201 | 5.13E-15 | -2.63127 | 1 | 1 RP5-827O9.1    | -      |
| ENSG00000229203 | 5.13E-15 | -2.63127 | 1 | 1 AC103564.7     | -      |
| ENSG00000229205 | 5.13E-15 | -2.63127 | 1 | 1 LINC00200      | -      |
| ENSG00000229206 | 5.13E-15 | -2.63127 | 1 | 1 RP11-397O4.1   | -      |
| ENSG00000229208 | 5.13E-15 | -2.63127 | 1 | 1 RBMY2NP        | K12885 |
| ENSG00000229209 | 5.13E-15 | -2.63127 | 1 | 1 AC073987.1     | -      |
| ENSG00000229211 | 5.13E-15 | -2.63127 | 1 | 1 RP11-363L24.2  | -      |
| ENSG00000229213 | 5.13E-15 | -2.63127 | 1 | 1 RP1-118J21.24  | -      |
| ENSG00000229217 | 5.13E-15 | -2.63127 | 1 | 1 CYCSP11        | K08738 |
| ENSG00000229220 | 5.13E-15 | -2.63127 | 1 | 1 RP11-47A17.2   | K16630 |
| ENSG00000229224 | 5.13E-15 | -2.63127 | 1 | 1 AC105398.3     | -      |
| ENSG00000229225 | 5.13E-15 | -2.63127 | 1 | 1 RP11-5P4.3     | -      |
| ENSG00000229226 | 5.13E-15 | -2.63127 | 1 | 1 BTF3L4P4       | K01527 |
| ENSG00000229227 | 5.13E-15 | -2.63127 | 1 | 1 RP11-38L15.2   | -      |
| ENSG00000229229 | 5.13E-15 | -2.63127 | 1 | 1 AC022201.4     | -      |
| ENSG00000229230 | 5.13E-15 | -2.63127 | 1 | 1 MT1P3          | K14739 |
| ENSG00000229231 | 5.13E-15 | -2.63127 | 1 | 1 FEM1AP1        | -      |
| ENSG00000229232 | 5.13E-15 | -2.63127 | 1 | 1 KRT18P53       | K07604 |
| ENSG00000229233 | 5.13E-15 | -2.63127 | 1 | 1 AC011891.5     | -      |
| ENSG00000229234 | 5.13E-15 | -2.63127 | 1 | 1 RBMY1KP        | K12885 |
| ENSG00000229236 | 5.13E-15 | -2.63127 | 1 | 1 TTTY10         | -      |
| ENSG00000229237 | 5.13E-15 | -2.63127 | 1 | 1 HMGNI1P37      | K11299 |
| ENSG00000229238 | 5.13E-15 | -2.63127 | 1 | 1 PPP1R12BP1     | K12329 |
| ENSG00000229239 | 5.13E-15 | -2.63127 | 1 | 1 RP11-223J15.2  | K03231 |
| ENSG00000229240 | 5.13E-15 | -2.63127 | 1 | 1 LINC00710      | -      |
| ENSG00000229241 | 5.13E-15 | -2.63127 | 1 | 1 PNPT1P1        | K00962 |
| ENSG00000229242 | 5.13E-15 | -2.63127 | 1 | 1 RP5-1111A8.3   | -      |
| ENSG00000229243 | 5.13E-15 | -2.63127 | 1 | 1 AC098973.1     | -      |
| ENSG00000229245 | 5.13E-15 | -2.63127 | 1 | 1 RP11-542K23.7  | -      |
| ENSG00000229246 | 5.13E-15 | -2.63127 | 1 | 1 RP11-521J24.1  | -      |
| ENSG00000229247 | 5.13E-15 | -2.63127 | 1 | 1 RP11-492M19.3  | -      |
| ENSG00000229248 | 5.13E-15 | -2.63127 | 1 | 1 WBP2P1         | -      |
| ENSG00000229249 | 5.13E-15 | -2.63127 | 1 | 1 LINC00446      | -      |
| ENSG00000229250 | 5.13E-15 | -2.63127 | 1 | 1 USP9YP31       | K11840 |
| ENSG00000229254 | 5.13E-15 | -2.63127 | 1 | 1 OR8C1P         | K04257 |
| ENSG00000229255 | 5.13E-15 | -2.63127 | 1 | 1 RP11-407H12.8  | -      |
| ENSG00000229257 | 5.13E-15 | -2.63127 | 1 | 1 RP11-229P13.22 | -      |



|                 |          |          |   |                    |        |
|-----------------|----------|----------|---|--------------------|--------|
| ENSG00000229258 | 5.13E-15 | -2.63127 | 1 | 1 RP11-552D8.1     | --     |
| ENSG00000229259 | 5.13E-15 | -2.63127 | 1 | 1 LRRC37A12P       | --     |
| ENSG00000229262 | 5.13E-15 | -2.63127 | 1 | 1 RP4-726N1.2      | --     |
| ENSG00000229263 | 5.13E-15 | -2.63127 | 1 | 1 AC004691.5       | --     |
| ENSG00000229266 | 5.13E-15 | -2.63127 | 1 | 1 POM121L8P        | --     |
| ENSG00000229268 | 5.13E-15 | -2.63127 | 1 | 1 PES1P2           | K14843 |
| ENSG00000229269 | 5.13E-15 | -2.63127 | 1 | 1 RP11-298A8.2     | --     |
| ENSG00000229271 | 5.13E-15 | -2.63127 | 1 | 1 AC091493.2       | --     |
| ENSG00000229272 | 5.13E-15 | -2.63127 | 1 | 1 RP11-498J9.2     | --     |
| ENSG00000229273 | 5.13E-15 | -2.63127 | 1 | 1 RP11-104G3.2     | --     |
| ENSG00000229274 | 5.13E-15 | -2.63127 | 1 | 1 XXbac-BPG13B8.1C | --     |
| ENSG00000229275 | 5.13E-15 | -2.63127 | 1 | 1 LL22NC03-121E8.3 | --     |
| ENSG00000229276 | 5.13E-15 | -2.63127 | 1 | 1 REV3L-IT1        | --     |
| ENSG00000229280 | 5.13E-15 | -2.63127 | 1 | 1 RP11-374C13.1    | K15410 |
| ENSG00000229281 | 5.13E-15 | -2.63127 | 1 | 1 GPR53P           | K04324 |
| ENSG00000229283 | 5.13E-15 | -2.63127 | 1 | 1 RP5-1125M8.2     | --     |
| ENSG00000229286 | 5.13E-15 | -2.63127 | 1 | 1 LA16c-4G1.4      | --     |
| ENSG00000229287 | 5.13E-15 | -2.63127 | 1 | 1 FABP5P4          | K08754 |
| ENSG00000229288 | 5.13E-15 | -2.63127 | 1 | 1 RP11-1E11.2      | K06030 |
| ENSG00000229289 | 5.13E-15 | -2.63127 | 1 | 1 AP000431.2       | --     |
| ENSG00000229291 | 5.13E-15 | -2.63127 | 1 | 1 RP4-580N22.2     | --     |
| ENSG00000229292 | 5.13E-15 | -2.63127 | 1 | 1 RFPL4AL1         | --     |
| ENSG00000229294 | 5.13E-15 | -2.63127 | 1 | 1 RP5-1044H5.1     | --     |
| ENSG00000229297 | 5.13E-15 | -2.63127 | 1 | 1 RP11-540H22.2    | --     |
| ENSG00000229299 | 5.13E-15 | -2.63127 | 1 | 1 RP4-583P15.10    | --     |
| ENSG00000229301 | 5.13E-15 | -2.63127 | 1 | 1 RP5-905H7.8      | --     |
| ENSG00000229302 | 5.13E-15 | -2.63127 | 1 | 1 TAF9P2           | K18532 |
| ENSG00000229303 | 5.13E-15 | -2.63127 | 1 | 1 PPIAP25          | K03767 |
| ENSG00000229305 | 5.13E-15 | -2.63127 | 1 | 1 RP11-431K24.2    | K03242 |
| ENSG00000229306 | 5.13E-15 | -2.63127 | 1 | 1 AP001464.4       | --     |
| ENSG00000229307 | 5.13E-15 | -2.63127 | 1 | 1 LINC00459        | --     |
| ENSG00000229308 | 5.13E-15 | -2.63127 | 1 | 1 AC010084.1       | --     |
| ENSG00000229309 | 5.13E-15 | -2.63127 | 1 | 1 RP11-452B18.2    | --     |
| ENSG00000229310 | 5.13E-15 | -2.63127 | 1 | 1 RPP40P1          | K14530 |
| ENSG00000229311 | 5.13E-15 | -2.63127 | 1 | 1 RP11-475I24.8    | --     |
| ENSG00000229312 | 5.13E-15 | -2.63127 | 1 | 1 RP11-470P21.2    | --     |
| ENSG00000229313 | 5.13E-15 | -2.63127 | 1 | 1 RP3-425P12.5     | --     |
| ENSG00000229314 | 5.13E-15 | -2.63127 | 1 | 1 ORM1             | K17308 |
| ENSG00000229315 | 5.13E-15 | -2.63127 | 1 | 1 MCHR2-AS1        | --     |
| ENSG00000229316 | 5.13E-15 | -2.63127 | 1 | 1 HMGB1P45         | K10802 |
| ENSG00000229321 | 5.13E-15 | -2.63127 | 1 | 1 AC008269.2       | --     |
| ENSG00000229322 | 5.13E-15 | -2.63127 | 1 | 1 RP5-937E21.1     | --     |
| ENSG00000229323 | 5.13E-15 | -2.63127 | 1 | 1 RP11-175B12.2    | --     |
| ENSG00000229324 | 5.13E-15 | -2.63127 | 1 | 1 RP5-1091N2.3     | --     |
| ENSG00000229326 | 5.13E-15 | -2.63127 | 1 | 1 AC069154.4       | K02880 |
| ENSG00000229330 | 5.13E-15 | -2.63127 | 1 | 1 AC006947.1       | --     |
| ENSG00000229331 | 5.13E-15 | -2.63127 | 1 | 1 GK-IT1           | --     |
| ENSG00000229332 | 5.13E-15 | -2.63127 | 1 | 1 PGBD4P8          | --     |
| ENSG00000229335 | 5.13E-15 | -2.63127 | 1 | 1 RP1-241P17.1     | --     |
| ENSG00000229336 | 5.13E-15 | -2.63127 | 1 | 1 AP000568.2       | --     |
| ENSG00000229337 | 5.13E-15 | -2.63127 | 1 | 1 AC079305.8       | --     |
| ENSG00000229338 | 5.13E-15 | -2.63127 | 1 | 1 RP11-92C4.4      | K00940 |
| ENSG00000229339 | 5.13E-15 | -2.63127 | 1 | 1 RP11-193I22.2    | --     |
| ENSG00000229343 | 5.13E-15 | -2.63127 | 1 | 1 CDY22P           | K00653 |
| ENSG00000229345 | 5.13E-15 | -2.63127 | 1 | 1 RP11-332M4.1     | --     |
| ENSG00000229347 | 5.13E-15 | -2.63127 | 1 | 1 RP11-504E21.1    | --     |
| ENSG00000229349 | 5.13E-15 | -2.63127 | 1 | 1 ACTG1P9          | K05692 |
| ENSG00000229351 | 5.13E-15 | -2.63127 | 1 | 1 KRTAP9-11P       | --     |

|                 |          |          |   |                 |        |
|-----------------|----------|----------|---|-----------------|--------|
| ENSG00000229352 | 5.13E-15 | -2.63127 | 1 | 1 AC007563.3    | -      |
| ENSG00000229357 | 5.13E-15 | -2.63127 | 1 | 1 CYCSP51       | K08738 |
| ENSG00000229359 | 5.13E-15 | -2.63127 | 1 | 1 PIN1P1        | K09578 |
| ENSG00000229360 | 5.13E-15 | -2.63127 | 1 | 1 PPP1R2P5      | K16833 |
| ENSG00000229361 | 5.13E-15 | -2.63127 | 1 | 1 UBTFL7        | -      |
| ENSG00000229365 | 5.13E-15 | -2.63127 | 1 | 1 RP4-639J15.2  | -      |
| ENSG00000229367 | 5.13E-15 | -2.63127 | 1 | 1 HMGN2P19      | K11300 |
| ENSG00000229369 | 5.13E-15 | -2.63127 | 1 | 1 RP13-225O21.5 | -      |
| ENSG00000229370 | 5.13E-15 | -2.63127 | 1 | 1 AC092635.1    | -      |
| ENSG00000229373 | 5.13E-15 | -2.63127 | 1 | 1 LINC00452     | -      |
| ENSG00000229375 | 5.13E-15 | -2.63127 | 1 | 1 USP24P1       | K11840 |
| ENSG00000229376 | 5.13E-15 | -2.63127 | 1 | 1 CICP3         | K16941 |
| ENSG00000229379 | 5.13E-15 | -2.63127 | 1 | 1 AC006041.1    | -      |
| ENSG00000229380 | 5.13E-15 | -2.63127 | 1 | 1 AC147651.5    | -      |
| ENSG00000229384 | 5.13E-15 | -2.63127 | 1 | 1 HMGB1P16      | K10802 |
| ENSG00000229385 | 5.13E-15 | -2.63127 | 1 | 1 AC010975.1    | -      |
| ENSG00000229386 | 5.13E-15 | -2.63127 | 1 | 1 OR8B9P        | K04257 |
| ENSG00000229387 | 5.13E-15 | -2.63127 | 1 | 1 AC103801.2    | K10893 |
| ENSG00000229389 | 5.13E-15 | -2.63127 | 1 | 1 CTD-2022H16.1 | -      |
| ENSG00000229390 | 5.13E-15 | -2.63127 | 1 | 1 MICD          | K07985 |
| ENSG00000229391 | 5.13E-15 | -2.63127 | 1 | 1 HLA-DRB6      | K06752 |
| ENSG00000229395 | 5.13E-15 | -2.63127 | 1 | 1 AC013401.1    | -      |
| ENSG00000229398 | 5.13E-15 | -2.63127 | 1 | 1 RP4-620E11.5  | -      |
| ENSG00000229399 | 5.13E-15 | -2.63127 | 1 | 1 RP11-378J18.6 | K04797 |
| ENSG00000229400 | 5.13E-15 | -2.63127 | 1 | 1 RP11-3L21.2   | -      |
| ENSG00000229402 | 5.13E-15 | -2.63127 | 1 | 1 AL162151.4    | -      |
| ENSG00000229403 | 5.13E-15 | -2.63127 | 1 | 1 RP4-718N17.2  | -      |
| ENSG00000229404 | 5.13E-15 | -2.63127 | 1 | 1 LINC00858     | -      |
| ENSG00000229405 | 5.13E-15 | -2.63127 | 1 | 1 AC092580.1    | K02732 |
| ENSG00000229406 | 5.13E-15 | -2.63127 | 1 | 1 OFD1P4Y       | K16480 |
| ENSG00000229407 | 5.13E-15 | -2.63127 | 1 | 1 RP11-12M5.3   | -      |
| ENSG00000229413 | 5.13E-15 | -2.63127 | 1 | 1 AC018638.1    | -      |
| ENSG00000229415 | 5.13E-15 | -2.63127 | 1 | 1 SFTA3         | -      |
| ENSG00000229416 | 5.13E-15 | -2.63127 | 1 | 1 USP9YP8       | -      |
| ENSG00000229417 | 5.13E-15 | -2.63127 | 1 | 1 NPM1P25       | K11276 |
| ENSG00000229418 | 5.13E-15 | -2.63127 | 1 | 1 RP11-35J23.1  | -      |
| ENSG00000229420 | 5.13E-15 | -2.63127 | 1 | 1 RP11-782C8.7  | -      |
| ENSG00000229421 | 5.13E-15 | -2.63127 | 1 | 1 AC133141.1    | K11253 |
| ENSG00000229422 | 5.13E-15 | -2.63127 | 1 | 1 RP11-262H14.5 | -      |
| ENSG00000229423 | 5.13E-15 | -2.63127 | 1 | 1 RPL27AP8      | K02900 |
| ENSG00000229424 | 5.13E-15 | -2.63127 | 1 | 1 AC007349.4    | -      |
| ENSG00000229433 | 5.13E-15 | -2.63127 | 1 | 1 RP11-329B9.1  | -      |
| ENSG00000229434 | 5.13E-15 | -2.63127 | 1 | 1 AC017048.1    | -      |
| ENSG00000229435 | 5.13E-15 | -2.63127 | 1 | 1 PIP5K1P2      | K00889 |
| ENSG00000229436 | 5.13E-15 | -2.63127 | 1 | 1 AC073850.6    | K04683 |
| ENSG00000229437 | 5.13E-15 | -2.63127 | 1 | 1 LINC00366     | -      |
| ENSG00000229440 | 5.13E-15 | -2.63127 | 1 | 1 RP5-1033K19.2 | K08504 |
| ENSG00000229442 | 5.13E-15 | -2.63127 | 1 | 1 THEMIS3P      | -      |
| ENSG00000229443 | 5.13E-15 | -2.63127 | 1 | 1 LINC00433     | -      |
| ENSG00000229444 | 5.13E-15 | -2.63127 | 1 | 1 RP11-184I16.4 | -      |
| ENSG00000229452 | 5.13E-15 | -2.63127 | 1 | 1 AC005162.4    | -      |
| ENSG00000229453 | 5.13E-15 | -2.63127 | 1 | 1 SPINK8        | -      |
| ENSG00000229454 | 5.13E-15 | -2.63127 | 1 | 1 RP11-202I11.2 | -      |
| ENSG00000229455 | 5.13E-15 | -2.63127 | 1 | 1 RPS10P18      | K02947 |
| ENSG00000229456 | 5.13E-15 | -2.63127 | 1 | 1 RLIMP1        | -      |
| ENSG00000229457 | 5.13E-15 | -2.63127 | 1 | 1 AC006227.1    | -      |
| ENSG00000229458 | 5.13E-15 | -2.63127 | 1 | 1 RP11-202D18.2 | -      |
| ENSG00000229459 | 5.13E-15 | -2.63127 | 1 | 1 AC023669.1    | -      |

|                 |          |          |   |                 |        |
|-----------------|----------|----------|---|-----------------|--------|
| ENSG00000229462 | 5.13E-15 | -2.63127 | 1 | 1 AC127383.1    | K15443 |
| ENSG00000229463 | 5.13E-15 | -2.63127 | 1 | 1 LYST-AS1      | -      |
| ENSG00000229464 | 5.13E-15 | -2.63127 | 1 | 1 RP11-481A12.6 | K02917 |
| ENSG00000229465 | 5.13E-15 | -2.63127 | 1 | 1 ACTG1P11      | K05692 |
| ENSG00000229466 | 5.13E-15 | -2.63127 | 1 | 1 RP11-56I23.1  | -      |
| ENSG00000229468 | 5.13E-15 | -2.63127 | 1 | 1 AC097635.5    | K02924 |
| ENSG00000229471 | 5.13E-15 | -2.63127 | 1 | 1 RP11-95K23.7  | -      |
| ENSG00000229477 | 5.13E-15 | -2.63127 | 1 | 1 FAM90A16P     | -      |
| ENSG00000229478 | 5.13E-15 | -2.63127 | 1 | 1 ROBO2P1       | K06754 |
| ENSG00000229481 | 5.13E-15 | -2.63127 | 1 | 1 CTD-2554C21.3 | -      |
| ENSG00000229483 | 5.13E-15 | -2.63127 | 1 | 1 LINC00362     | -      |
| ENSG00000229484 | 5.13E-15 | -2.63127 | 1 | 1 RP5-888M10.2  | -      |
| ENSG00000229485 | 5.13E-15 | -2.63127 | 1 | 1 KSR1P1        | K14958 |
| ENSG00000229486 | 5.13E-15 | -2.63127 | 1 | 1 RP4-552O12.1  | K05638 |
| ENSG00000229489 | 5.13E-15 | -2.63127 | 1 | 1 ATP5A1P5      | K02132 |
| ENSG00000229492 | 5.13E-15 | -2.63127 | 1 | 1 AC004019.10   | K11113 |
| ENSG00000229494 | 5.13E-15 | -2.63127 | 1 | 1 AC012494.1    | -      |
| ENSG00000229495 | 5.13E-15 | -2.63127 | 1 | 1 RP11-173D14.3 | -      |
| ENSG00000229498 | 5.13E-15 | -2.63127 | 1 | 1 AC105053.3    | -      |
| ENSG00000229500 | 5.13E-15 | -2.63127 | 1 | 1 RPL17P1       | K02880 |
| ENSG00000229502 | 5.13E-15 | -2.63127 | 1 | 1 RP11-52J3.2   | -      |
| ENSG00000229503 | 5.13E-15 | -2.63127 | 1 | 1 AC092155.1    | K02889 |
| ENSG00000229505 | 5.13E-15 | -2.63127 | 1 | 1 RP4-682E18.1  | -      |
| ENSG00000229508 | 5.13E-15 | -2.63127 | 1 | 1 PHKG1P4       | K00871 |
| ENSG00000229509 | 5.13E-15 | -2.63127 | 1 | 1 RP11-421E17.4 | -      |
| ENSG00000229511 | 5.13E-15 | -2.63127 | 1 | 1 RP11-392E22.1 | -      |
| ENSG00000229513 | 5.13E-15 | -2.63127 | 1 | 1 EIF4EBP1P2    | K07205 |
| ENSG00000229515 | 5.13E-15 | -2.63127 | 1 | 1 FLT1P1        | K05096 |
| ENSG00000229518 | 5.13E-15 | -2.63127 | 1 | 1 UBE2V1P3      | K10704 |
| ENSG00000229520 | 5.13E-15 | -2.63127 | 1 | 1 LINC00404     | -      |
| ENSG00000229521 | 5.13E-15 | -2.63127 | 1 | 1 MYCBP2-AS2    | -      |
| ENSG00000229522 | 5.13E-15 | -2.63127 | 1 | 1 RP11-347D21.4 | -      |
| ENSG00000229531 | 5.13E-15 | -2.63127 | 1 | 1 RP1-102G20.5  | -      |
| ENSG00000229532 | 5.13E-15 | -2.63127 | 1 | 1 AC105443.2    | -      |
| ENSG00000229533 | 5.13E-15 | -2.63127 | 1 | 1 AC003986.5    | -      |
| ENSG00000229534 | 5.13E-15 | -2.63127 | 1 | 1 HNRNPA1P53    | K12741 |
| ENSG00000229536 | 5.13E-15 | -2.63127 | 1 | 1 AC079776.1    | -      |
| ENSG00000229537 | 5.13E-15 | -2.63127 | 1 | 1 RP11-5P4.1    | -      |
| ENSG00000229541 | 5.13E-15 | -2.63127 | 1 | 1 GAPDHP26      | K00134 |
| ENSG00000229542 | 5.13E-15 | -2.63127 | 1 | 1 SSU72P7       | K15544 |
| ENSG00000229543 | 5.13E-15 | -2.63127 | 1 | 1 RP11-90J7.2   | -      |
| ENSG00000229544 | 5.13E-15 | -2.63127 | 1 | 1 NKX1-2        | K09309 |
| ENSG00000229546 | 5.13E-15 | -2.63127 | 1 | 1 LINC00428     | -      |
| ENSG00000229547 | 5.13E-15 | -2.63127 | 1 | 1 UBE2DNL       | K06689 |
| ENSG00000229549 | 5.13E-15 | -2.63127 | 1 | 1 TSPY8         | K11284 |
| ENSG00000229550 | 5.13E-15 | -2.63127 | 1 | 1 AC012445.1    | -      |
| ENSG00000229551 | 5.13E-15 | -2.63127 | 1 | 1 GAPDHP17      | -      |
| ENSG00000229553 | 5.13E-15 | -2.63127 | 1 | 1 USP9YP17      | -      |
| ENSG00000229554 | 5.13E-15 | -2.63127 | 1 | 1 RPL21P24      | K02889 |
| ENSG00000229556 | 5.13E-15 | -2.63127 | 1 | 1 RP11-363G2.4  | -      |
| ENSG00000229557 | 5.13E-15 | -2.63127 | 1 | 1 LINC00379     | -      |
| ENSG00000229558 | 5.13E-15 | -2.63127 | 1 | 1 SACS-AS1      | -      |
| ENSG00000229559 | 5.13E-15 | -2.63127 | 1 | 1 RP1-153P14.3  | K02969 |
| ENSG00000229560 | 5.13E-15 | -2.63127 | 1 | 1 AC105761.1    | -      |
| ENSG00000229562 | 5.13E-15 | -2.63127 | 1 | 1 ZFYVE9P1      | K04679 |
| ENSG00000229565 | 5.13E-15 | -2.63127 | 1 | 1 AC108056.1    | -      |
| ENSG00000229568 | 5.13E-15 | -2.63127 | 1 | 1 AC010146.1    | K06675 |
| ENSG00000229570 | 5.13E-15 | -2.63127 | 1 | 1 GAPDHP58      | K00134 |

|                 |          |          |   |                  |        |
|-----------------|----------|----------|---|------------------|--------|
| ENSG00000229571 | 5.13E-15 | -2.63127 | 1 | 1 PRAMEF26       | -      |
| ENSG00000229572 | 5.13E-15 | -2.63127 | 1 | 1 EIF4BP4        | K03258 |
| ENSG00000229578 | 5.13E-15 | -2.63127 | 1 | 1 LINC00358      | -      |
| ENSG00000229579 | 5.13E-15 | -2.63127 | 1 | 1 USP17L26       | K11845 |
| ENSG00000229582 | 5.13E-15 | -2.63127 | 1 | 1 RP11-423C15.3  | -      |
| ENSG00000229583 | 5.13E-15 | -2.63127 | 1 | 1 RP1-172N19.1   | -      |
| ENSG00000229585 | 5.13E-15 | -2.63127 | 1 | 1 RPL21P44       | K02889 |
| ENSG00000229586 | 5.13E-15 | -2.63127 | 1 | 1 RP11-434D2.6   | K18752 |
| ENSG00000229588 | 5.13E-15 | -2.63127 | 1 | 1 RP11-479J7.2   | -      |
| ENSG00000229590 | 5.13E-15 | -2.63127 | 1 | 1 MSX2P1         | K09341 |
| ENSG00000229593 | 5.13E-15 | -2.63127 | 1 | 1 SUCLA2P3       | K01900 |
| ENSG00000229594 | 5.13E-15 | -2.63127 | 1 | 1 RP11-167P23.4  | -      |
| ENSG00000229595 | 5.13E-15 | -2.63127 | 1 | 1 RP5-1097F14.1  | K03767 |
| ENSG00000229596 | 5.13E-15 | -2.63127 | 1 | 1 MYL8P          | K12757 |
| ENSG00000229599 | 5.13E-15 | -2.63127 | 1 | 1 LINC00411      | -      |
| ENSG00000229600 | 5.13E-15 | -2.63127 | 1 | 1 RP11-524K14.1  | -      |
| ENSG00000229601 | 5.13E-15 | -2.63127 | 1 | 1 AL590762.10    | -      |
| ENSG00000229603 | 5.13E-15 | -2.63127 | 1 | 1 AC004014.3     | -      |
| ENSG00000229604 | 5.13E-15 | -2.63127 | 1 | 1 MTATP8P2       | K02125 |
| ENSG00000229606 | 5.13E-15 | -2.63127 | 1 | 1 RP5-827L5.1    | -      |
| ENSG00000229607 | 5.13E-15 | -2.63127 | 1 | 1 RP5-1125N11.1  | -      |
| ENSG00000229608 | 5.13E-15 | -2.63127 | 1 | 1 GOLGA2P4       | -      |
| ENSG00000229609 | 5.13E-15 | -2.63127 | 1 | 1 LINC01079      | -      |
| ENSG00000229611 | 5.13E-15 | -2.63127 | 1 | 1 RP11-390F4.10  | -      |
| ENSG00000229612 | 5.13E-15 | -2.63127 | 1 | 1 SUMO1P2        | K12160 |
| ENSG00000229613 | 5.13E-15 | -2.63127 | 1 | 1 RP11-555F9.2   | -      |
| ENSG00000229615 | 5.13E-15 | -2.63127 | 1 | 1 AC111200.1     | -      |
| ENSG00000229616 | 5.13E-15 | -2.63127 | 1 | 1 RP11-369J21.11 | -      |
| ENSG00000229618 | 5.13E-15 | -2.63127 | 1 | 1 AC011288.2     | -      |
| ENSG00000229620 | 5.13E-15 | -2.63127 | 1 | 1 AF196972.2     | K00819 |
| ENSG00000229621 | 5.13E-15 | -2.63127 | 1 | 1 AC018742.1     | -      |
| ENSG00000229622 | 5.13E-15 | -2.63127 | 1 | 1 MTND5P2        | -      |
| ENSG00000229623 | 5.13E-15 | -2.63127 | 1 | 1 METTL21AP1     | -      |
| ENSG00000229625 | 5.13E-15 | -2.63127 | 1 | 1 RP11-44N12.2   | -      |
| ENSG00000229626 | 5.13E-15 | -2.63127 | 1 | 1 PIGCP2         | K03859 |
| ENSG00000229627 | 5.13E-15 | -2.63127 | 1 | 1 RP11-368M16.4  | -      |
| ENSG00000229629 | 5.13E-15 | -2.63127 | 1 | 1 RP11-302K17.4  | K03094 |
| ENSG00000229630 | 5.13E-15 | -2.63127 | 1 | 1 RP11-124O11.2  | -      |
| ENSG00000229636 | 5.13E-15 | -2.63127 | 1 | 1 KRT8P21        | K07605 |
| ENSG00000229639 | 5.13E-15 | -2.63127 | 1 | 1 RP3-380B4.1    | -      |
| ENSG00000229641 | 5.13E-15 | -2.63127 | 1 | 1 CYP2C56P       | K17719 |
| ENSG00000229642 | 5.13E-15 | -2.63127 | 1 | 1 AC027119.1     | -      |
| ENSG00000229643 | 5.13E-15 | -2.63127 | 1 | 1 LINC00280      | -      |
| ENSG00000229646 | 5.13E-15 | -2.63127 | 1 | 1 RP11-330A16.1  | -      |
| ENSG00000229649 | 5.13E-15 | -2.63127 | 1 | 1 RP11-107I14.4  | -      |
| ENSG00000229652 | 5.13E-15 | -2.63127 | 1 | 1 RP11-435P24.2  | -      |
| ENSG00000229654 | 5.13E-15 | -2.63127 | 1 | 1 RP1-60O19.2    | -      |
| ENSG00000229657 | 5.13E-15 | -2.63127 | 1 | 1 RP11-494K3.2   | K02872 |
| ENSG00000229658 | 5.13E-15 | -2.63127 | 1 | 1 PABPC1P9       | K13126 |
| ENSG00000229661 | 5.13E-15 | -2.63127 | 1 | 1 RP11-145B3.2   | K12873 |
| ENSG00000229662 | 5.13E-15 | -2.63127 | 1 | 1 RP11-552E4.5   | K00819 |
| ENSG00000229663 | 5.13E-15 | -2.63127 | 1 | 1 AL672296.1     | -      |
| ENSG00000229664 | 5.13E-15 | -2.63127 | 1 | 1 RP11-536K7.5   | -      |
| ENSG00000229665 | 5.13E-15 | -2.63127 | 1 | 1 PRR20C         | -      |
| ENSG00000229667 | 5.13E-15 | -2.63127 | 1 | 1 UBE2V1P9       | K10704 |
| ENSG00000229668 | 5.13E-15 | -2.63127 | 1 | 1 RP11-317F20.2  | K11094 |
| ENSG00000229670 | 5.13E-15 | -2.63127 | 1 | 1 PKP4P1         | -      |
| ENSG00000229671 | 5.13E-15 | -2.63127 | 1 | 1 LINC01150      | -      |

|                 |          |          |   |                    |        |
|-----------------|----------|----------|---|--------------------|--------|
| ENSG00000229672 | 5.13E-15 | -2.63127 | 1 | 1 RP11-184A2.3     | -      |
| ENSG00000229673 | 5.13E-15 | -2.63127 | 1 | 1 LL22NC01-116C6.1 | -      |
| ENSG00000229674 | 5.13E-15 | -2.63127 | 1 | 1 AL121578.7       | K11251 |
| ENSG00000229679 | 5.13E-15 | -2.63127 | 1 | 1 AC007327.5       | -      |
| ENSG00000229682 | 5.13E-15 | -2.63127 | 1 | 1 AC114755.5       | K02976 |
| ENSG00000229686 | 5.13E-15 | -2.63127 | 1 | 1 SNORD56          | -      |
| ENSG00000229687 | 5.13E-15 | -2.63127 | 1 | 1 RP4-654H19.2     | K02922 |
| ENSG00000229688 | 5.13E-15 | -2.63127 | 1 | 1 ISPD-AS1         | -      |
| ENSG00000229689 | 5.13E-15 | -2.63127 | 1 | 1 AC009237.8       | K09228 |
| ENSG00000229690 | 5.13E-15 | -2.63127 | 1 | 1 MTCO2P1          | K02261 |
| ENSG00000229693 | 5.13E-15 | -2.63127 | 1 | 1 RP11-25C15.1     | K03875 |
| ENSG00000229695 | 5.13E-15 | -2.63127 | 1 | 1 AC011242.5       | -      |
| ENSG00000229696 | 5.13E-15 | -2.63127 | 1 | 1 KARSP1           | K04567 |
| ENSG00000229697 | 5.13E-15 | -2.63127 | 1 | 1 RP11-374M1.3     | -      |
| ENSG00000229699 | 5.13E-15 | -2.63127 | 1 | 1 RP1-140J1.1      | -      |
| ENSG00000229700 | 5.13E-15 | -2.63127 | 1 | 1 RP1-130G2.1      | K02905 |
| ENSG00000229701 | 5.13E-15 | -2.63127 | 1 | 1 MTND2P20         | K14220 |
| ENSG00000229702 | 5.13E-15 | -2.63127 | 1 | 1 RP1-274L7.1      | -      |
| ENSG00000229704 | 5.13E-15 | -2.63127 | 1 | 1 EIF2S2P2         | K03238 |
| ENSG00000229707 | 5.13E-15 | -2.63127 | 1 | 1 RP11-100J16.4    | K03094 |
| ENSG00000229708 | 5.13E-15 | -2.63127 | 1 | 1 MARK2P12         | -      |
| ENSG00000229709 | 5.13E-15 | -2.63127 | 1 | 1 USP9YP36         | K11840 |
| ENSG00000229711 | 5.13E-15 | -2.63127 | 1 | 1 RP11-449O16.2    | -      |
| ENSG00000229713 | 5.13E-15 | -2.63127 | 1 | 1 RP1-43O17.1      | -      |
| ENSG00000229716 | 5.13E-15 | -2.63127 | 1 | 1 RP11-185B14.1    | K02893 |
| ENSG00000229717 | 5.13E-15 | -2.63127 | 1 | 1 RP11-556N4.1     | -      |
| ENSG00000229719 | 5.13E-15 | -2.63127 | 1 | 1 MIR194-2         | -      |
| ENSG00000229720 | 5.13E-15 | -2.63127 | 1 | 1 RP3-495K2.2      | -      |
| ENSG00000229721 | 5.13E-15 | -2.63127 | 1 | 1 RP11-252I14.1    | K02995 |
| ENSG00000229722 | 5.13E-15 | -2.63127 | 1 | 1 RP11-557H15.5    | -      |
| ENSG00000229723 | 5.13E-15 | -2.63127 | 1 | 1 LINC01054        | -      |
| ENSG00000229724 | 5.13E-15 | -2.63127 | 1 | 1 OR2AQ1P          | -      |
| ENSG00000229725 | 5.13E-15 | -2.63127 | 1 | 1 AC007322.1       | -      |
| ENSG00000229727 | 5.13E-15 | -2.63127 | 1 | 1 AC013460.1       | -      |
| ENSG00000229730 | 5.13E-15 | -2.63127 | 1 | 1 AC013268.4       | K09228 |
| ENSG00000229731 | 5.13E-15 | -2.63127 | 1 | 1 RP11-501H19.2    | -      |
| ENSG00000229732 | 5.13E-15 | -2.63127 | 1 | 1 AC019349.5       | -      |
| ENSG00000229733 | 5.13E-15 | -2.63127 | 1 | 1 RP5-1189B24.1    | K03948 |
| ENSG00000229735 | 5.13E-15 | -2.63127 | 1 | 1 FTLP16           | K13625 |
| ENSG00000229738 | 5.13E-15 | -2.63127 | 1 | 1 AC010240.3       | K12846 |
| ENSG00000229739 | 5.13E-15 | -2.63127 | 1 | 1 RP11-295K2.3     | -      |
| ENSG00000229740 | 5.13E-15 | -2.63127 | 1 | 1 U91324.1         | -      |
| ENSG00000229742 | 5.13E-15 | -2.63127 | 1 | 1 RP11-365O16.5    | K02889 |
| ENSG00000229743 | 5.13E-15 | -2.63127 | 1 | 1 LINC01159        | -      |
| ENSG00000229744 | 5.13E-15 | -2.63127 | 1 | 1 AC011998.2       | K00237 |
| ENSG00000229745 | 5.13E-15 | -2.63127 | 1 | 1 BPY2DP           | -      |
| ENSG00000229746 | 5.13E-15 | -2.63127 | 1 | 1 FAM74A4          | -      |
| ENSG00000229747 | 5.13E-15 | -2.63127 | 1 | 1 RP11-567B20.2    | -      |
| ENSG00000229749 | 5.13E-15 | -2.63127 | 1 | 1 COTL1P1          | -      |
| ENSG00000229751 | 5.13E-15 | -2.63127 | 1 | 1 RP11-142M10.2    | -      |
| ENSG00000229752 | 5.13E-15 | -2.63127 | 1 | 1 RPL7P10          | K02937 |
| ENSG00000229753 | 5.13E-15 | -2.63127 | 1 | 1 RP11-28P17.3     | K02977 |
| ENSG00000229754 | 5.13E-15 | -2.63127 | 1 | 1 CXCR2P1          | K05050 |
| ENSG00000229755 | 5.13E-15 | -2.63127 | 1 | 1 RP5-827L5.2      | -      |
| ENSG00000229756 | 5.13E-15 | -2.63127 | 1 | 1 RPL31P20         | -      |
| ENSG00000229757 | 5.13E-15 | -2.63127 | 1 | 1 RP4-738P11.4     | K02936 |
| ENSG00000229759 | 5.13E-15 | -2.63127 | 1 | 1 MRPS18AP1        | K02963 |
| ENSG00000229760 | 5.13E-15 | -2.63127 | 1 | 1 RP11-266I3.5     | -      |

|                 |          |          |   |                    |        |
|-----------------|----------|----------|---|--------------------|--------|
| ENSG00000229761 | 5.13E-15 | -2.63127 | 1 | 1 RPS20P1          | -      |
| ENSG00000229762 | 5.13E-15 | -2.63127 | 1 | 1 RP11-419M24.1    | K11514 |
| ENSG00000229765 | 5.13E-15 | -2.63127 | 1 | 1 RP11-339A7.1     | K02889 |
| ENSG00000229769 | 5.13E-15 | -2.63127 | 1 | 1 TRBV10-2         | K10785 |
| ENSG00000229770 | 5.13E-15 | -2.63127 | 1 | 1 CTA-796E4.4      | -      |
| ENSG00000229771 | 5.13E-15 | -2.63127 | 1 | 1 RP4-644L1.2      | -      |
| ENSG00000229774 | 5.13E-15 | -2.63127 | 1 | 1 AC018866.1       | -      |
| ENSG00000229775 | 5.13E-15 | -2.63127 | 1 | 1 RP11-298H24.1    | -      |
| ENSG00000229776 | 5.13E-15 | -2.63127 | 1 | 1 C4B-AS1          | -      |
| ENSG00000229779 | 5.13E-15 | -2.63127 | 1 | 1 AC016751.2       | -      |
| ENSG00000229782 | 5.13E-15 | -2.63127 | 1 | 1 AC118754.4       | -      |
| ENSG00000229785 | 5.13E-15 | -2.63127 | 1 | 1 SLC25A38P1       | K15118 |
| ENSG00000229788 | 5.13E-15 | -2.63127 | 1 | 1 LINC00388        | -      |
| ENSG00000229791 | 5.13E-15 | -2.63127 | 1 | 1 RP11-385E5.5     | -      |
| ENSG00000229792 | 5.13E-15 | -2.63127 | 1 | 1 LINC00399        | -      |
| ENSG00000229794 | 5.13E-15 | -2.63127 | 1 | 1 RP11-522L3.11    | -      |
| ENSG00000229796 | 5.13E-15 | -2.63127 | 1 | 1 RP5-1077H22.1    | -      |
| ENSG00000229797 | 5.13E-15 | -2.63127 | 1 | 1 AC140481.8       | -      |
| ENSG00000229798 | 5.13E-15 | -2.63127 | 1 | 1 KRT18P26         | K07604 |
| ENSG00000229801 | 5.13E-15 | -2.63127 | 1 | 1 RP11-353N4.1     | -      |
| ENSG00000229805 | 5.13E-15 | -2.63127 | 1 | 1 AC011306.1       | -      |
| ENSG00000229806 | 5.13E-15 | -2.63127 | 1 | 1 RPS15P5          | K02958 |
| ENSG00000229807 | 5.13E-15 | -2.63127 | 1 | 1 XIST             | -      |
| ENSG00000229814 | 5.13E-15 | -2.63127 | 1 | 1 RPL35AP21        | K02917 |
| ENSG00000229815 | 5.13E-15 | -2.63127 | 1 | 1 CCNB1IP1P1       | K10639 |
| ENSG00000229816 | 5.13E-15 | -2.63127 | 1 | 1 DDX50P1          | K13183 |
| ENSG00000229817 | 5.13E-15 | -2.63127 | 1 | 1 RP11-78H18.2     | K08827 |
| ENSG00000229818 | 5.13E-15 | -2.63127 | 1 | 1 RP11-459A10.3    | -      |
| ENSG00000229820 | 5.13E-15 | -2.63127 | 1 | 1 RP1-308E4.1      | K09528 |
| ENSG00000229822 | 5.13E-15 | -2.63127 | 1 | 1 RP5-1174J21.2    | K02957 |
| ENSG00000229824 | 5.13E-15 | -2.63127 | 1 | 1 RPL12P34         | -      |
| ENSG00000229825 | 5.13E-15 | -2.63127 | 1 | 1 RP5-1052M9.4     | -      |
| ENSG00000229826 | 5.13E-15 | -2.63127 | 1 | 1 RP11-552J9.14    | K00819 |
| ENSG00000229827 | 5.13E-15 | -2.63127 | 1 | 1 AC093899.3       | -      |
| ENSG00000229828 | 5.13E-15 | -2.63127 | 1 | 1 RP11-94I2.1      | K16549 |
| ENSG00000229829 | 5.13E-15 | -2.63127 | 1 | 1 DUTP4            | -      |
| ENSG00000229830 | 5.13E-15 | -2.63127 | 1 | 1 RP11-341A22.1    | -      |
| ENSG00000229831 | 5.13E-15 | -2.63127 | 1 | 1 AC108039.3       | K12741 |
| ENSG00000229834 | 5.13E-15 | -2.63127 | 1 | 1 RP11-48L13.1     | -      |
| ENSG00000229835 | 5.13E-15 | -2.63127 | 1 | 1 KHSRPP1          | K13210 |
| ENSG00000229836 | 5.13E-15 | -2.63127 | 1 | 1 XXbac-BPG248L24. | -      |
| ENSG00000229839 | 5.13E-15 | -2.63127 | 1 | 1 AC018462.2       | -      |
| ENSG00000229840 | 5.13E-15 | -2.63127 | 1 | 1 ISCA1P2          | K13628 |
| ENSG00000229842 | 5.13E-15 | -2.63127 | 1 | 1 RP5-837O21.4     | -      |
| ENSG00000229846 | 5.13E-15 | -2.63127 | 1 | 1 RP11-141A19.1    | -      |
| ENSG00000229847 | 5.13E-15 | -2.63127 | 1 | 1 EMX2OS           | -      |
| ENSG00000229848 | 5.13E-15 | -2.63127 | 1 | 1 RP13-766D20.2    | -      |
| ENSG00000229849 | 5.13E-15 | -2.63127 | 1 | 1 RP11-393K10.1    | -      |
| ENSG00000229851 | 5.13E-15 | -2.63127 | 1 | 1 ARSD-AS1         | -      |
| ENSG00000229853 | 5.13E-15 | -2.63127 | 1 | 1 RP5-1049G16.4    | -      |
| ENSG00000229854 | 5.13E-15 | -2.63127 | 1 | 1 RP11-524G24.2    | -      |
| ENSG00000229855 | 5.13E-15 | -2.63127 | 1 | 1 CTC-546K23.1     | -      |
| ENSG00000229857 | 5.13E-15 | -2.63127 | 1 | 1 RP11-159H20.3    | K03245 |
| ENSG00000229858 | 5.13E-15 | -2.63127 | 1 | 1 AC016831.5       | -      |
| ENSG00000229859 | 5.13E-15 | -2.63127 | 1 | 1 PGA3             | K06002 |
| ENSG00000229863 | 5.13E-15 | -2.63127 | 1 | 1 RP11-157F20.1    | K02885 |
| ENSG00000229865 | 5.13E-15 | -2.63127 | 1 | 1 RPL31P54         | K02910 |
| ENSG00000229871 | 5.13E-15 | -2.63127 | 1 | 1 RP4-710M16.1     | K02998 |

|                 |          |          |   |                 |        |
|-----------------|----------|----------|---|-----------------|--------|
| ENSG00000229874 | 5.13E-15 | -2.63127 | 1 | 1 RP11-312O7.2  | _      |
| ENSG00000229875 | 5.13E-15 | -2.63127 | 1 | 1 RP11-130C19.1 | K03113 |
| ENSG00000229876 | 5.13E-15 | -2.63127 | 1 | 1 CASC20        | _      |
| ENSG00000229877 | 5.13E-15 | -2.63127 | 1 | 1 PAICSP5       | K01587 |
| ENSG00000229878 | 5.13E-15 | -2.63127 | 1 | 1 RP11-479G22.7 | K05719 |
| ENSG00000229880 | 5.13E-15 | -2.63127 | 1 | 1 IMMTP1        | K17785 |
| ENSG00000229881 | 5.13E-15 | -2.63127 | 1 | 1 RP11-321E8.4  | _      |
| ENSG00000229882 | 5.13E-15 | -2.63127 | 1 | 1 RP13-30A9.2   | _      |
| ENSG00000229885 | 5.13E-15 | -2.63127 | 1 | 1 RP13-77O11.12 | _      |
| ENSG00000229886 | 5.13E-15 | -2.63127 | 1 | 1 RP5-1132H15.3 | _      |
| ENSG00000229887 | 5.13E-15 | -2.63127 | 1 | 1 HNRNPA1P6     | K12741 |
| ENSG00000229890 | 5.13E-15 | -2.63127 | 1 | 1 AC023672.1    | K05692 |
| ENSG00000229892 | 5.13E-15 | -2.63127 | 1 | 1 RP4-730D4.1   | _      |
| ENSG00000229897 | 5.13E-15 | -2.63127 | 1 | 1 SEPT7P7       | K16944 |
| ENSG00000229899 | 5.13E-15 | -2.63127 | 1 | 1 AC084290.2    | _      |
| ENSG00000229900 | 5.13E-15 | -2.63127 | 1 | 1 HSPD1P21      | _      |
| ENSG00000229905 | 5.13E-15 | -2.63127 | 1 | 1 RP11-206L10.4 | _      |
| ENSG00000229906 | 5.13E-15 | -2.63127 | 1 | 1 SNRPGP11      | K11099 |
| ENSG00000229907 | 5.13E-15 | -2.63127 | 1 | 1 DEFB108P1     | _      |
| ENSG00000229909 | 5.13E-15 | -2.63127 | 1 | 1 TRIM60P16     | K12029 |
| ENSG00000229910 | 5.13E-15 | -2.63127 | 1 | 1 HNRNPA1P18    | K12741 |
| ENSG00000229911 | 5.13E-15 | -2.63127 | 1 | 1 RP4-630J13.1  | _      |
| ENSG00000229912 | 5.13E-15 | -2.63127 | 1 | 1 AC128709.4    | _      |
| ENSG00000229913 | 5.13E-15 | -2.63127 | 1 | 1 RP11-378I13.1 | _      |
| ENSG00000229914 | 5.13E-15 | -2.63127 | 1 | 1 RP11-404O13.4 | K02947 |
| ENSG00000229917 | 5.13E-15 | -2.63127 | 1 | 1 RPL7P46       | _      |
| ENSG00000229918 | 5.13E-15 | -2.63127 | 1 | 1 DOCK9-AS1     | _      |
| ENSG00000229919 | 5.13E-15 | -2.63127 | 1 | 1 TCEB1P3       | K03872 |
| ENSG00000229921 | 5.13E-15 | -2.63127 | 1 | 1 KIF25-AS1     | _      |
| ENSG00000229922 | 5.13E-15 | -2.63127 | 1 | 1 RP11-240M16.1 | _      |
| ENSG00000229923 | 5.13E-15 | -2.63127 | 1 | 1 RP11-102N11.1 | _      |
| ENSG00000229924 | 5.13E-15 | -2.63127 | 1 | 1 FAM90A26      | _      |
| ENSG00000229928 | 5.13E-15 | -2.63127 | 1 | 1 LINC00400     | _      |
| ENSG00000229935 | 5.13E-15 | -2.63127 | 1 | 1 AC092662.6    | _      |
| ENSG00000229936 | 5.13E-15 | -2.63127 | 1 | 1 RBM22P9       | _      |
| ENSG00000229937 | 5.13E-15 | -2.63127 | 1 | 1 PRPS1L1       | K00948 |
| ENSG00000229938 | 5.13E-15 | -2.63127 | 1 | 1 MYO16-AS2     | _      |
| ENSG00000229940 | 5.13E-15 | -2.63127 | 1 | 1 TSPY22P       | _      |
| ENSG00000229941 | 5.13E-15 | -2.63127 | 1 | 1 AC012499.1    | _      |
| ENSG00000229943 | 5.13E-15 | -2.63127 | 1 | 1 RP11-93N20.1  | _      |
| ENSG00000229946 | 5.13E-15 | -2.63127 | 1 | 1 RP11-368G3.1  | K00741 |
| ENSG00000229947 | 5.13E-15 | -2.63127 | 1 | 1 RP13-766D20.1 | _      |
| ENSG00000229948 | 5.13E-15 | -2.63127 | 1 | 1 AC092431.2    | K00719 |
| ENSG00000229949 | 5.13E-15 | -2.63127 | 1 | 1 AC005094.2    | K02910 |
| ENSG00000229952 | 5.13E-15 | -2.63127 | 1 | 1 RP6-74O6.3    | _      |
| ENSG00000229957 | 5.13E-15 | -2.63127 | 1 | 1 RP5-998H6.2   | _      |
| ENSG00000229960 | 5.13E-15 | -2.63127 | 1 | 1 RP11-278H7.4  | _      |
| ENSG00000229961 | 5.13E-15 | -2.63127 | 1 | 1 RP11-71G12.1  | _      |
| ENSG00000229962 | 5.13E-15 | -2.63127 | 1 | 1 AP000221.1    | _      |
| ENSG00000229965 | 5.13E-15 | -2.63127 | 1 | 1 RP11-118H4.1  | K02984 |
| ENSG00000229967 | 5.13E-15 | -2.63127 | 1 | 1 RP11-366F6.2  | _      |
| ENSG00000229968 | 5.13E-15 | -2.63127 | 1 | 1 RP3-393P12.1  | K09228 |
| ENSG00000229969 | 5.13E-15 | -2.63127 | 1 | 1 RP11-96C23.10 | _      |
| ENSG00000229970 | 5.13E-15 | -2.63127 | 1 | 1 AC007128.1    | _      |
| ENSG00000229971 | 5.13E-15 | -2.63127 | 1 | 1 RP5-1119A7.10 | _      |
| ENSG00000229972 | 5.13E-15 | -2.63127 | 1 | 1 IQCF3         | _      |
| ENSG00000229974 | 5.13E-15 | -2.63127 | 1 | 1 AC083862.1    | _      |
| ENSG00000229975 | 5.13E-15 | -2.63127 | 1 | 1 LIPT1P1       | K10105 |

|                 |          |          |   |                 |        |
|-----------------|----------|----------|---|-----------------|--------|
| ENSG00000229976 | 5.13E-15 | -2.63127 | 1 | 1 RP5-1031J8.1  | -      |
| ENSG00000229977 | 5.13E-15 | -2.63127 | 1 | 1 AC073264.10   | K02898 |
| ENSG00000229978 | 5.13E-15 | -2.63127 | 1 | 1 RP13-221M14.3 | -      |
| ENSG00000229979 | 5.13E-15 | -2.63127 | 1 | 1 U82670.9      | K11300 |
| ENSG00000229981 | 5.13E-15 | -2.63127 | 1 | 1 RP11-215N21.1 | -      |
| ENSG00000229982 | 5.13E-15 | -2.63127 | 1 | 1 RP11-515K14.1 | K09191 |
| ENSG00000229985 | 5.13E-15 | -2.63127 | 1 | 1 RP11-40H20.5  | K02882 |
| ENSG00000229986 | 5.13E-15 | -2.63127 | 1 | 1 AP001042.1    | -      |
| ENSG00000229988 | 5.13E-15 | -2.63127 | 1 | 1 HBBP1         | K13825 |
| ENSG00000229991 | 5.13E-15 | -2.63127 | 1 | 1 AKR1B1P1      | K00011 |
| ENSG00000229996 | 5.13E-15 | -2.63127 | 1 | 1 AC093585.6    | -      |
| ENSG00000230000 | 5.13E-15 | -2.63127 | 1 | 1 AC006455.1    | K15100 |
| ENSG00000230001 | 5.13E-15 | -2.63127 | 1 | 1 RP11-70J12.1  | -      |
| ENSG00000230003 | 5.13E-15 | -2.63127 | 1 | 1 RP11-217F16.1 | -      |
| ENSG00000230006 | 5.13E-15 | -2.63127 | 1 | 1 ANKRD36BP2    | K17299 |
| ENSG00000230009 | 5.13E-15 | -2.63127 | 1 | 1 MTCO2P3       | K02261 |
| ENSG00000230010 | 5.13E-15 | -2.63127 | 1 | 1 RP4-568F9.6   | -      |
| ENSG00000230011 | 5.13E-15 | -2.63127 | 1 | 1 CTSLP4        | K01365 |
| ENSG00000230013 | 5.13E-15 | -2.63127 | 1 | 1 RP11-217B7.3  | -      |
| ENSG00000230014 | 5.13E-15 | -2.63127 | 1 | 1 LINC00709     | -      |
| ENSG00000230015 | 5.13E-15 | -2.63127 | 1 | 1 RP11-80B9.4   | -      |
| ENSG00000230018 | 5.13E-15 | -2.63127 | 1 | 1 RP11-481H12.1 | K03767 |
| ENSG00000230019 | 5.13E-15 | -2.63127 | 1 | 1 YWHAQP9       | -      |
| ENSG00000230022 | 5.13E-15 | -2.63127 | 1 | 1 FNTAP2        | K05955 |
| ENSG00000230023 | 5.13E-15 | -2.63127 | 1 | 1 RP11-10N16.2  | -      |
| ENSG00000230024 | 5.13E-15 | -2.63127 | 1 | 1 RP11-95P13.1  | -      |
| ENSG00000230025 | 5.13E-15 | -2.63127 | 1 | 1 AC007967.4    | -      |
| ENSG00000230026 | 5.13E-15 | -2.63127 | 1 | 1 RP11-382D8.5  | K05626 |
| ENSG00000230027 | 5.13E-15 | -2.63127 | 1 | 1 RP11-550H2.2  | -      |
| ENSG00000230029 | 5.13E-15 | -2.63127 | 1 | 1 CDY11P        | K00653 |
| ENSG00000230030 | 5.13E-15 | -2.63127 | 1 | 1 RP11-505C13.1 | -      |
| ENSG00000230031 | 5.13E-15 | -2.63127 | 1 | 1 POTE2         | K17299 |
| ENSG00000230033 | 5.13E-15 | -2.63127 | 1 | 1 RP5-1121A15.3 | -      |
| ENSG00000230035 | 5.13E-15 | -2.63127 | 1 | 1 RP11-174G17   | -      |
| ENSG00000230036 | 5.13E-15 | -2.63127 | 1 | 1 AL596137.1    | -      |
| ENSG00000230039 | 5.13E-15 | -2.63127 | 1 | 1 RP11-314A15.2 | -      |
| ENSG00000230040 | 5.13E-15 | -2.63127 | 1 | 1 LINC00364     | -      |
| ENSG00000230043 | 5.13E-15 | -2.63127 | 1 | 1 TMSB4XP6      | K05764 |
| ENSG00000230044 | 5.13E-15 | -2.63127 | 1 | 1 AC110754.3    | K04212 |
| ENSG00000230045 | 5.13E-15 | -2.63127 | 1 | 1 FAM90A15P     | -      |
| ENSG00000230046 | 5.13E-15 | -2.63127 | 1 | 1 BIRC6-AS1     | -      |
| ENSG00000230051 | 5.13E-15 | -2.63127 | 1 | 1 CTA-929C8.8   | -      |
| ENSG00000230052 | 5.13E-15 | -2.63127 | 1 | 1 MTND3P2       | -      |
| ENSG00000230053 | 5.13E-15 | -2.63127 | 1 | 1 RP11-76N22.1  | K15501 |
| ENSG00000230056 | 5.13E-15 | -2.63127 | 1 | 1 DDX6P1        | K12614 |
| ENSG00000230062 | 5.13E-15 | -2.63127 | 1 | 1 ANKRD66       | -      |
| ENSG00000230063 | 5.13E-15 | -2.63127 | 1 | 1 RP11-384C4.6  | -      |
| ENSG00000230064 | 5.13E-15 | -2.63127 | 1 | 1 RP11-244N20.7 | K02889 |
| ENSG00000230065 | 5.13E-15 | -2.63127 | 1 | 1 AC010974.3    | -      |
| ENSG00000230066 | 5.13E-15 | -2.63127 | 1 | 1 FAM197Y3      | -      |
| ENSG00000230067 | 5.13E-15 | -2.63127 | 1 | 1 HSPD1P6       | K04077 |
| ENSG00000230073 | 5.13E-15 | -2.63127 | 1 | 1 AC009947.2    | -      |
| ENSG00000230077 | 5.13E-15 | -2.63127 | 1 | 1 MTAPP2        | K00772 |
| ENSG00000230079 | 5.13E-15 | -2.63127 | 1 | 1 RP11-535K18.2 | K08838 |
| ENSG00000230080 | 5.13E-15 | -2.63127 | 1 | 1 AC139143.2    | K05692 |
| ENSG00000230081 | 5.13E-15 | -2.63127 | 1 | 1 HSPE1P28      | K04078 |
| ENSG00000230083 | 5.13E-15 | -2.63127 | 1 | 1 AC009237.13   | K12019 |
| ENSG00000230086 | 5.13E-15 | -2.63127 | 1 | 1 VN1R96P       | K04614 |



|                 |          |          |   |                 |        |
|-----------------|----------|----------|---|-----------------|--------|
| ENSG00000230087 | 5.13E-15 | -2.63127 | 1 | 1 AC104389.31   | K12562 |
| ENSG00000230088 | 5.13E-15 | -2.63127 | 1 | 1 KRT16P5       | K07604 |
| ENSG00000230090 | 5.13E-15 | -2.63127 | 1 | 1 AC108025.2    | -      |
| ENSG00000230096 | 5.13E-15 | -2.63127 | 1 | 1 RP11-34C15.2  | -      |
| ENSG00000230097 | 5.13E-15 | -2.63127 | 1 | 1 RP11-460C6.1  | K00027 |
| ENSG00000230099 | 5.13E-15 | -2.63127 | 1 | 1 TRBV5-4       | K10785 |
| ENSG00000230100 | 5.13E-15 | -2.63127 | 1 | 1 RP11-344N17.8 | -      |
| ENSG00000230101 | 5.13E-15 | -2.63127 | 1 | 1 TUBB3P2       | K07375 |
| ENSG00000230104 | 5.13E-15 | -2.63127 | 1 | 1 AC018712.2    | K18710 |
| ENSG00000230105 | 5.13E-15 | -2.63127 | 1 | 1 RP11-431N15.2 | -      |
| ENSG00000230106 | 5.13E-15 | -2.63127 | 1 | 1 AF228730.7    | K11095 |
| ENSG00000230110 | 5.13E-15 | -2.63127 | 1 | 1 AC005086.1    | K12795 |
| ENSG00000230111 | 5.13E-15 | -2.63127 | 1 | 1 AC115283.1    | K11253 |
| ENSG00000230112 | 5.13E-15 | -2.63127 | 1 | 1 RP11-56H7.2   | -      |
| ENSG00000230113 | 5.13E-15 | -2.63127 | 1 | 1 AC091177.1    | -      |
| ENSG00000230114 | 5.13E-15 | -2.63127 | 1 | 1 RP11-141A19.2 | -      |
| ENSG00000230115 | 5.13E-15 | -2.63127 | 1 | 1 TPRG1-AS2     | -      |
| ENSG00000230116 | 5.13E-15 | -2.63127 | 1 | 1 RP11-163G10.2 | K02984 |
| ENSG00000230118 | 5.13E-15 | -2.63127 | 1 | 1 AC092569.2    | K02877 |
| ENSG00000230119 | 5.13E-15 | -2.63127 | 1 | 1 AC123900.2    | K08738 |
| ENSG00000230120 | 5.13E-15 | -2.63127 | 1 | 1 RP1-90G24.8   | -      |
| ENSG00000230121 | 5.13E-15 | -2.63127 | 1 | 1 RP11-385N23.1 | -      |
| ENSG00000230122 | 5.13E-15 | -2.63127 | 1 | 1 ECEL1P3       | K09610 |
| ENSG00000230123 | 5.13E-15 | -2.63127 | 1 | 1 DLEC1P1       | -      |
| ENSG00000230125 | 5.13E-15 | -2.63127 | 1 | 1 EEF1A1P39     | -      |
| ENSG00000230126 | 5.13E-15 | -2.63127 | 1 | 1 FGF12-AS2     | -      |
| ENSG00000230130 | 5.13E-15 | -2.63127 | 1 | 1 RP5-1189K21.2 | -      |
| ENSG00000230131 | 5.13E-15 | -2.63127 | 1 | 1 RP11-282I1.1  | -      |
| ENSG00000230132 | 5.13E-15 | -2.63127 | 1 | 1 RP5-1193P9.2  | -      |
| ENSG00000230137 | 5.13E-15 | -2.63127 | 1 | 1 RP4-539M6.18  | K14709 |
| ENSG00000230138 | 5.13E-15 | -2.63127 | 1 | 1 RP11-117D22.2 | -      |
| ENSG00000230140 | 5.13E-15 | -2.63127 | 1 | 1 AC016738.3    | -      |
| ENSG00000230142 | 5.13E-15 | -2.63127 | 1 | 1 LINC01075     | -      |
| ENSG00000230147 | 5.13E-15 | -2.63127 | 1 | 1 RP11-305L7.5  | K03767 |
| ENSG00000230153 | 5.13E-15 | -2.63127 | 1 | 1 AF003626.1    | -      |
| ENSG00000230155 | 5.13E-15 | -2.63127 | 1 | 1 RP3-477O4.14  | -      |
| ENSG00000230156 | 5.13E-15 | -2.63127 | 1 | 1 LINC00443     | -      |
| ENSG00000230157 | 5.13E-15 | -2.63127 | 1 | 1 ATP5G1P1      | K02128 |
| ENSG00000230158 | 5.13E-15 | -2.63127 | 1 | 1 MTND1P28      | -      |
| ENSG00000230159 | 5.13E-15 | -2.63127 | 1 | 1 RP11-232D9.3  | -      |
| ENSG00000230160 | 5.13E-15 | -2.63127 | 1 | 1 AC004854.5    | K17402 |
| ENSG00000230161 | 5.13E-15 | -2.63127 | 1 | 1 RP11-62L10.1  | -      |
| ENSG00000230162 | 5.13E-15 | -2.63127 | 1 | 1 RP11-97N5.2   | -      |
| ENSG00000230164 | 5.13E-15 | -2.63127 | 1 | 1 MAS1LP1       | K04324 |
| ENSG00000230165 | 5.13E-15 | -2.63127 | 1 | 1 CTB-1144G6.5  | K11481 |
| ENSG00000230166 | 5.13E-15 | -2.63127 | 1 | 1 RP11-526K21.2 | K02917 |
| ENSG00000230169 | 5.13E-15 | -2.63127 | 1 | 1 RPL30P16      | K02908 |
| ENSG00000230170 | 5.13E-15 | -2.63127 | 1 | 1 HNRNPA1P28    | K12741 |
| ENSG00000230171 | 5.13E-15 | -2.63127 | 1 | 1 RPL22P18      | K02891 |
| ENSG00000230172 | 5.13E-15 | -2.63127 | 1 | 1 AC090957.2    | -      |
| ENSG00000230173 | 5.13E-15 | -2.63127 | 1 | 1 AC006196.1    | -      |
| ENSG00000230174 | 5.13E-15 | -2.63127 | 1 | 1 LINC01149     | -      |
| ENSG00000230175 | 5.13E-15 | -2.63127 | 1 | 1 RP11-466F5.3  | K02953 |
| ENSG00000230178 | 5.13E-15 | -2.63127 | 1 | 1 OR4F3         | K04257 |
| ENSG00000230180 | 5.13E-15 | -2.63127 | 1 | 1 CTD-2542O7.2  | K02870 |
| ENSG00000230182 | 5.13E-15 | -2.63127 | 1 | 1 RNF10P1       | -      |
| ENSG00000230184 | 5.13E-15 | -2.63127 | 1 | 1 SMYD3-IT1     | -      |
| ENSG00000230186 | 5.13E-15 | -2.63127 | 1 | 1 RP5-998N21.7  | -      |

|                 |          |          |   |                 |        |
|-----------------|----------|----------|---|-----------------|--------|
| ENSG00000230187 | 5.13E-15 | -2.63127 | 1 | 1 RP11-291O7.1  | -      |
| ENSG00000230188 | 5.13E-15 | -2.63127 | 1 | 1 RP11-405L18.4 | K02889 |
| ENSG00000230190 | 5.13E-15 | -2.63127 | 1 | 1 AC005518.2    | -      |
| ENSG00000230191 | 5.13E-15 | -2.63127 | 1 | 1 RP4-725G10.3  | K06566 |
| ENSG00000230192 | 5.13E-15 | -2.63127 | 1 | 1 AC073387.2    | K11867 |
| ENSG00000230194 | 5.13E-15 | -2.63127 | 1 | 1 AC000081.2    | K02915 |
| ENSG00000230196 | 5.13E-15 | -2.63127 | 1 | 1 AC010091.4    | K17043 |
| ENSG00000230197 | 5.13E-15 | -2.63127 | 1 | 1 RP11-160E2.17 | -      |
| ENSG00000230198 | 5.13E-15 | -2.63127 | 1 | 1 RPL37P4       | K02922 |
| ENSG00000230199 | 5.13E-15 | -2.63127 | 1 | 1 RP11-331N16.1 | K02928 |
| ENSG00000230203 | 5.13E-15 | -2.63127 | 1 | 1 CTB-1048E9.7  | K02984 |
| ENSG00000230205 | 5.13E-15 | -2.63127 | 1 | 1 RP11-631F7.2  | -      |
| ENSG00000230208 | 5.13E-15 | -2.63127 | 1 | 1 IFNNP1        | K05414 |
| ENSG00000230210 | 5.13E-15 | -2.63127 | 1 | 1 FAM35EP       | -      |
| ENSG00000230213 | 5.13E-15 | -2.63127 | 1 | 1 OR8V1P        | K04257 |
| ENSG00000230214 | 5.13E-15 | -2.63127 | 1 | 1 FTLP18        | -      |
| ENSG00000230215 | 5.13E-15 | -2.63127 | 1 | 1 EIF2B5-AS1    | -      |
| ENSG00000230216 | 5.13E-15 | -2.63127 | 1 | 1 HSPB1P2       | K04455 |
| ENSG00000230219 | 5.13E-15 | -2.63127 | 1 | 1 FAM92A1P2     | -      |
| ENSG00000230221 | 5.13E-15 | -2.63127 | 1 | 1 RP11-173G21.1 | -      |
| ENSG00000230223 | 5.13E-15 | -2.63127 | 1 | 1 ATXN8OS       | -      |
| ENSG00000230225 | 5.13E-15 | -2.63127 | 1 | 1 MTND5P14      | K03883 |
| ENSG00000230226 | 5.13E-15 | -2.63127 | 1 | 1 RP4-697K14.3  | -      |
| ENSG00000230227 | 5.13E-15 | -2.63127 | 1 | 1 SIAH1P1       | K04506 |
| ENSG00000230228 | 5.13E-15 | -2.63127 | 1 | 1 RP11-4M23.4   | K11253 |
| ENSG00000230229 | 5.13E-15 | -2.63127 | 1 | 1 RP11-90J7.4   | -      |
| ENSG00000230231 | 5.13E-15 | -2.63127 | 1 | 1 FMO7P         | -      |
| ENSG00000230233 | 5.13E-15 | -2.63127 | 1 | 1 AF240627.2    | -      |
| ENSG00000230237 | 5.13E-15 | -2.63127 | 1 | 1 AC010975.2    | K04639 |
| ENSG00000230239 | 5.13E-15 | -2.63127 | 1 | 1 RP11-108M9.2  | -      |
| ENSG00000230240 | 5.13E-15 | -2.63127 | 1 | 1 RP11-241I20.1 | -      |
| ENSG00000230241 | 5.13E-15 | -2.63127 | 1 | 1 RP11-38O23.3  | -      |
| ENSG00000230243 | 5.13E-15 | -2.63127 | 1 | 1 FKBP1AP3      | K09568 |
| ENSG00000230244 | 5.13E-15 | -2.63127 | 1 | 1 RAD23BP2      | K10839 |
| ENSG00000230245 | 5.13E-15 | -2.63127 | 1 | 1 RP11-475I24.7 | K04613 |
| ENSG00000230246 | 5.13E-15 | -2.63127 | 1 | 1 SPATA31C1     | -      |
| ENSG00000230247 | 5.13E-15 | -2.63127 | 1 | 1 HNRNPH3P1     | K12898 |
| ENSG00000230248 | 5.13E-15 | -2.63127 | 1 | 1 RP1-128O3.4   | -      |
| ENSG00000230249 | 5.13E-15 | -2.63127 | 1 | 1 RP13-824C8.2  | K02974 |
| ENSG00000230250 | 5.13E-15 | -2.63127 | 1 | 1 RP11-90C4.2   | -      |
| ENSG00000230252 | 5.13E-15 | -2.63127 | 1 | 1 MTND2P4       | -      |
| ENSG00000230255 | 5.13E-15 | -2.63127 | 1 | 1 RP11-423O2.1  | K02256 |
| ENSG00000230256 | 5.13E-15 | -2.63127 | 1 | 1 FGFR10P2P1    | -      |
| ENSG00000230258 | 5.13E-15 | -2.63127 | 1 | 1 AC002539.1    | -      |
| ENSG00000230259 | 5.13E-15 | -2.63127 | 1 | 1 AC008738.1    | K09055 |
| ENSG00000230261 | 5.13E-15 | -2.63127 | 1 | 1 OR52J2P       | K04257 |
| ENSG00000230262 | 5.13E-15 | -2.63127 | 1 | 1 MIRLET7DHG    | -      |
| ENSG00000230265 | 5.13E-15 | -2.63127 | 1 | 1 RP11-702C7.1  | -      |
| ENSG00000230266 | 5.13E-15 | -2.63127 | 1 | 1 XXYLT1-AS2    | -      |
| ENSG00000230268 | 5.13E-15 | -2.63127 | 1 | 1 SSU72P8       | K15544 |
| ENSG00000230269 | 5.13E-15 | -2.63127 | 1 | 1 RP1-40E16.9   | -      |
| ENSG00000230271 | 5.13E-15 | -2.63127 | 1 | 1 RP11-548K12.5 | -      |
| ENSG00000230273 | 5.13E-15 | -2.63127 | 1 | 1 AC087163.3    | K09699 |
| ENSG00000230274 | 5.13E-15 | -2.63127 | 1 | 1 PGAM1P3       | K01834 |
| ENSG00000230275 | 5.13E-15 | -2.63127 | 1 | 1 SERBP1P4      | K13199 |
| ENSG00000230276 | 5.13E-15 | -2.63127 | 1 | 1 RP11-373A6.1  | -      |
| ENSG00000230281 | 5.13E-15 | -2.63127 | 1 | 1 AL590812.3    | -      |
| ENSG00000230282 | 5.13E-15 | -2.63127 | 1 | 1 RPL7P61       | K02937 |

|                 |          |          |   |                    |        |
|-----------------|----------|----------|---|--------------------|--------|
| ENSG00000230283 | 5.13E-15 | -2.63127 | 1 | 1 RPS12P24         | -      |
| ENSG00000230284 | 5.13E-15 | -2.63127 | 1 | 1 RP11-402G3.4     | K02937 |
| ENSG00000230285 | 5.13E-15 | -2.63127 | 1 | 1 RP11-290M5.2     | -      |
| ENSG00000230286 | 5.13E-15 | -2.63127 | 1 | 1 AC013472.4       | -      |
| ENSG00000230290 | 5.13E-15 | -2.63127 | 1 | 1 ARMC2-AS1        | -      |
| ENSG00000230292 | 5.13E-15 | -2.63127 | 1 | 1 NAALADL2-AS3     | -      |
| ENSG00000230294 | 5.13E-15 | -2.63127 | 1 | 1 RP13-507P19.2    | -      |
| ENSG00000230298 | 5.13E-15 | -2.63127 | 1 | 1 RP11-253D19.2    | -      |
| ENSG00000230299 | 5.13E-15 | -2.63127 | 1 | 1 AC093162.3       | K11097 |
| ENSG00000230300 | 5.13E-15 | -2.63127 | 1 | 1 STARD13-IT1      | -      |
| ENSG00000230301 | 5.13E-15 | -2.63127 | 1 | 1 OR5H6            | K04257 |
| ENSG00000230302 | 5.13E-15 | -2.63127 | 1 | 1 MTND3P4          | -      |
| ENSG00000230307 | 5.13E-15 | -2.63127 | 1 | 1 OR6C5P           | K04257 |
| ENSG00000230309 | 5.13E-15 | -2.63127 | 1 | 1 RP3-390M24.1     | -      |
| ENSG00000230312 | 5.13E-15 | -2.63127 | 1 | 1 LL0XNC01-116E7.4 | -      |
| ENSG00000230313 | 5.13E-15 | -2.63127 | 1 | 1 HCG24            | -      |
| ENSG00000230314 | 5.13E-15 | -2.63127 | 1 | 1 ELOVL2-AS1       | -      |
| ENSG00000230316 | 5.13E-15 | -2.63127 | 1 | 1 FEZF1-AS1        | -      |
| ENSG00000230317 | 5.13E-15 | -2.63127 | 1 | 1 RP11-104D21.3    | -      |
| ENSG00000230318 | 5.13E-15 | -2.63127 | 1 | 1 XRCC6P3          | K10884 |
| ENSG00000230320 | 5.13E-15 | -2.63127 | 1 | 1 RP4-769N13.2     | -      |
| ENSG00000230322 | 5.13E-15 | -2.63127 | 1 | 1 RP3-323N1.2      | -      |
| ENSG00000230323 | 5.13E-15 | -2.63127 | 1 | 1 LINC00159        | -      |
| ENSG00000230324 | 5.13E-15 | -2.63127 | 1 | 1 RP4-705O1.1      | -      |
| ENSG00000230326 | 5.13E-15 | -2.63127 | 1 | 1 HMG1N1P33        | -      |
| ENSG00000230327 | 5.13E-15 | -2.63127 | 1 | 1 AC009234.1       | K02256 |
| ENSG00000230328 | 5.13E-15 | -2.63127 | 1 | 1 RP11-35N6.6      | K10497 |
| ENSG00000230331 | 5.13E-15 | -2.63127 | 1 | 1 RP5-1068B5.1     | K02889 |
| ENSG00000230333 | 5.13E-15 | -2.63127 | 1 | 1 AC004538.3       | -      |
| ENSG00000230335 | 5.13E-15 | -2.63127 | 1 | 1 RP11-159H20.1    | -      |
| ENSG00000230338 | 5.13E-15 | -2.63127 | 1 | 1 MTND4P19         | -      |
| ENSG00000230339 | 5.13E-15 | -2.63127 | 1 | 1 RP11-434D2.8     | -      |
| ENSG00000230342 | 5.13E-15 | -2.63127 | 1 | 1 FANCD2P2         | K10891 |
| ENSG00000230343 | 5.13E-15 | -2.63127 | 1 | 1 AC018892.8       | K12019 |
| ENSG00000230347 | 5.13E-15 | -2.63127 | 1 | 1 CT47A8           | -      |
| ENSG00000230350 | 5.13E-15 | -2.63127 | 1 | 1 RPL35AP3         | K02917 |
| ENSG00000230352 | 5.13E-15 | -2.63127 | 1 | 1 RP4-614C15.3     | -      |
| ENSG00000230353 | 5.13E-15 | -2.63127 | 1 | 1 AC114755.2       | -      |
| ENSG00000230355 | 5.13E-15 | -2.63127 | 1 | 1 AC009474.2       | K02928 |
| ENSG00000230356 | 5.13E-15 | -2.63127 | 1 | 1 NCAPD2P1         | K06677 |
| ENSG00000230360 | 5.13E-15 | -2.63127 | 1 | 1 DDX10P2          | K14776 |
| ENSG00000230361 | 5.13E-15 | -2.63127 | 1 | 1 VN1R32P          | -      |
| ENSG00000230362 | 5.13E-15 | -2.63127 | 1 | 1 RP11-809F4.2     | K05692 |
| ENSG00000230364 | 5.13E-15 | -2.63127 | 1 | 1 RPL4P3           | K02930 |
| ENSG00000230365 | 5.13E-15 | -2.63127 | 1 | 1 RP11-23D5.1      | -      |
| ENSG00000230366 | 5.13E-15 | -2.63127 | 1 | 1 DSCR9            | -      |
| ENSG00000230370 | 5.13E-15 | -2.63127 | 1 | 1 AC005007.3       | K02893 |
| ENSG00000230371 | 5.13E-15 | -2.63127 | 1 | 1 KARSP2           | -      |
| ENSG00000230372 | 5.13E-15 | -2.63127 | 1 | 1 RP3-425P12.2     | -      |
| ENSG00000230375 | 5.13E-15 | -2.63127 | 1 | 1 RP11-392A23.4    | K00799 |
| ENSG00000230376 | 5.13E-15 | -2.63127 | 1 | 1 MEMO1P4          | -      |
| ENSG00000230377 | 5.13E-15 | -2.63127 | 1 | 1 TCEB1P7          | -      |
| ENSG00000230379 | 5.13E-15 | -2.63127 | 1 | 1 AP000146.2       | -      |
| ENSG00000230381 | 5.13E-15 | -2.63127 | 1 | 1 RP4-655J12.5     | -      |
| ENSG00000230384 | 5.13E-15 | -2.63127 | 1 | 1 AC016739.1       | K02998 |
| ENSG00000230385 | 5.13E-15 | -2.63127 | 1 | 1 AC012507.4       | -      |
| ENSG00000230386 | 5.13E-15 | -2.63127 | 1 | 1 RP13-157F18.2    | K04608 |
| ENSG00000230390 | 5.13E-15 | -2.63127 | 1 | 1 LINC01048        | -      |

|                 |          |          |   |                  |        |
|-----------------|----------|----------|---|------------------|--------|
| ENSG00000230391 | 5.13E-15 | -2.63127 | 1 | 1 RPSAP23        | K02998 |
| ENSG00000230392 | 5.13E-15 | -2.63127 | 1 | 1 RP5-1139I1.1   | --     |
| ENSG00000230393 | 5.13E-15 | -2.63127 | 1 | 1 AC092667.2     | --     |
| ENSG00000230398 | 5.13E-15 | -2.63127 | 1 | 1 AC026882.1     | --     |
| ENSG00000230400 | 5.13E-15 | -2.63127 | 1 | 1 RP11-359G22.2  | --     |
| ENSG00000230401 | 5.13E-15 | -2.63127 | 1 | 1 AC090505.4     | --     |
| ENSG00000230402 | 5.13E-15 | -2.63127 | 1 | 1 RP11-84O12.4   | --     |
| ENSG00000230403 | 5.13E-15 | -2.63127 | 1 | 1 LINC01066      | --     |
| ENSG00000230404 | 5.13E-15 | -2.63127 | 1 | 1 RP5-855F14.2   | --     |
| ENSG00000230405 | 5.13E-15 | -2.63127 | 1 | 1 RPS3AP52       | K02984 |
| ENSG00000230406 | 5.13E-15 | -2.63127 | 1 | 1 AC079834.1     | K02894 |
| ENSG00000230407 | 5.13E-15 | -2.63127 | 1 | 1 AC018717.2     | --     |
| ENSG00000230408 | 5.13E-15 | -2.63127 | 1 | 1 AC007163.6     | --     |
| ENSG00000230410 | 5.13E-15 | -2.63127 | 1 | 1 XXbac-B33L19.6 | --     |
| ENSG00000230411 | 5.13E-15 | -2.63127 | 1 | 1 OR3D1P         | --     |
| ENSG00000230412 | 5.13E-15 | -2.63127 | 1 | 1 TCEB1P12       | --     |
| ENSG00000230416 | 5.13E-15 | -2.63127 | 1 | 1 OR5M4P         | K04257 |
| ENSG00000230417 | 5.13E-15 | -2.63127 | 1 | 1 LINC00856      | --     |
| ENSG00000230418 | 5.13E-15 | -2.63127 | 1 | 1 ARL2BPP7       | K16742 |
| ENSG00000230423 | 5.13E-15 | -2.63127 | 1 | 1 XX-C2158C6.1   | --     |
| ENSG00000230425 | 5.13E-15 | -2.63127 | 1 | 1 RSU1P1         | --     |
| ENSG00000230427 | 5.13E-15 | -2.63127 | 1 | 1 RP11-313A24.1  | --     |
| ENSG00000230428 | 5.13E-15 | -2.63127 | 1 | 1 RP1-196A12.1   | --     |
| ENSG00000230430 | 5.13E-15 | -2.63127 | 1 | 1 USP17L25       | K11845 |
| ENSG00000230434 | 5.13E-15 | -2.63127 | 1 | 1 RP11-14O19.1   | --     |
| ENSG00000230435 | 5.13E-15 | -2.63127 | 1 | 1 AC004160.4     | --     |
| ENSG00000230437 | 5.13E-15 | -2.63127 | 1 | 1 RP11-102J14.1  | --     |
| ENSG00000230440 | 5.13E-15 | -2.63127 | 1 | 1 RP13-329D4.3   | --     |
| ENSG00000230442 | 5.13E-15 | -2.63127 | 1 | 1 RP11-390E23.3  | --     |
| ENSG00000230445 | 5.13E-15 | -2.63127 | 1 | 1 LRRC37A6P      | --     |
| ENSG00000230446 | 5.13E-15 | -2.63127 | 1 | 1 RP11-423O2.3   | K03880 |
| ENSG00000230447 | 5.13E-15 | -2.63127 | 1 | 1 CTF2P          | --     |
| ENSG00000230448 | 5.13E-15 | -2.63127 | 1 | 1 LINC00276      | --     |
| ENSG00000230449 | 5.13E-15 | -2.63127 | 1 | 1 RPL7P4         | K02937 |
| ENSG00000230450 | 5.13E-15 | -2.63127 | 1 | 1 NEK2P4         | K08857 |
| ENSG00000230451 | 5.13E-15 | -2.63127 | 1 | 1 RPS29P6        | K02980 |
| ENSG00000230452 | 5.13E-15 | -2.63127 | 1 | 1 AC012457.2     | --     |
| ENSG00000230455 | 5.13E-15 | -2.63127 | 1 | 1 BMS1P14        | K14569 |
| ENSG00000230458 | 5.13E-15 | -2.63127 | 1 | 1 GPM6BP1        | --     |
| ENSG00000230461 | 5.13E-15 | -2.63127 | 1 | 1 PROX1-AS1      | --     |
| ENSG00000230465 | 5.13E-15 | -2.63127 | 1 | 1 VENTXP4        | K08834 |
| ENSG00000230469 | 5.13E-15 | -2.63127 | 1 | 1 RPL5P26        | K02932 |
| ENSG00000230470 | 5.13E-15 | -2.63127 | 1 | 1 GS1-115G20.1   | --     |
| ENSG00000230471 | 5.13E-15 | -2.63127 | 1 | 1 LA16c-2F2.8    | --     |
| ENSG00000230472 | 5.13E-15 | -2.63127 | 1 | 1 RP1-28O17.1    | --     |
| ENSG00000230474 | 5.13E-15 | -2.63127 | 1 | 1 ATP6V1G1P7     | --     |
| ENSG00000230476 | 5.13E-15 | -2.63127 | 1 | 1 OFD1P9Y        | K16480 |
| ENSG00000230477 | 5.13E-15 | -2.63127 | 1 | 1 AC005034.2     | K09303 |
| ENSG00000230478 | 5.13E-15 | -2.63127 | 1 | 1 RP1-52D1.1     | K00134 |
| ENSG00000230480 | 5.13E-15 | -2.63127 | 1 | 1 AC093142.2     | K02915 |
| ENSG00000230481 | 5.13E-15 | -2.63127 | 1 | 1 IGKV1OR22-5    | --     |
| ENSG00000230482 | 5.13E-15 | -2.63127 | 1 | 1 ATP5G2P3       | K02128 |
| ENSG00000230483 | 5.13E-15 | -2.63127 | 1 | 1 AC124057.5     | --     |
| ENSG00000230484 | 5.13E-15 | -2.63127 | 1 | 1 OR51A10P       | K04257 |
| ENSG00000230485 | 5.13E-15 | -2.63127 | 1 | 1 AC000077.2     | --     |
| ENSG00000230489 | 5.13E-15 | -2.63127 | 1 | 1 VAV3-AS1       | --     |
| ENSG00000230490 | 5.13E-15 | -2.63127 | 1 | 1 RP11-141M1.3   | --     |
| ENSG00000230491 | 5.13E-15 | -2.63127 | 1 | 1 RP13-228J13.10 | --     |

|                 |          |          |   |                  |        |
|-----------------|----------|----------|---|------------------|--------|
| ENSG00000230492 | 5.13E-15 | -2.63127 | 1 | 1 RP4-753D10.5   | -      |
| ENSG00000230493 | 5.13E-15 | -2.63127 | 1 | 1 AC106017.1     | -      |
| ENSG00000230496 | 5.13E-15 | -2.63127 | 1 | 1 AC068137.6     | -      |
| ENSG00000230497 | 5.13E-15 | -2.63127 | 1 | 1 RP11-432A8.2   | K03232 |
| ENSG00000230498 | 5.13E-15 | -2.63127 | 1 | 1 RP4-564M11.2   | -      |
| ENSG00000230501 | 5.13E-15 | -2.63127 | 1 | 1 ANKRD30BP3     | K17299 |
| ENSG00000230502 | 5.13E-15 | -2.63127 | 1 | 1 CTD-2230M5.1   | K15436 |
| ENSG00000230506 | 5.13E-15 | -2.63127 | 1 | 1 RP11-416N4.4   | -      |
| ENSG00000230507 | 5.13E-15 | -2.63127 | 1 | 1 RPL7AP8        | K02936 |
| ENSG00000230508 | 5.13E-15 | -2.63127 | 1 | 1 RPL19P21       | K02885 |
| ENSG00000230515 | 5.13E-15 | -2.63127 | 1 | 1 AC092580.3     | -      |
| ENSG00000230519 | 5.13E-15 | -2.63127 | 1 | 1 RP11-1060J15.5 | K10802 |
| ENSG00000230520 | 5.13E-15 | -2.63127 | 1 | 1 RP11-533K11.1  | K03246 |
| ENSG00000230521 | 5.13E-15 | -2.63127 | 1 | 1 HCG4P7         | K06751 |
| ENSG00000230522 | 5.13E-15 | -2.63127 | 1 | 1 MBD3L2         | -      |
| ENSG00000230523 | 5.13E-15 | -2.63127 | 1 | 1 RP3-437I16.1   | -      |
| ENSG00000230524 | 5.13E-15 | -2.63127 | 1 | 1 COL6A4P1       | K06238 |
| ENSG00000230525 | 5.13E-15 | -2.63127 | 1 | 1 AC007403.2     | -      |
| ENSG00000230529 | 5.13E-15 | -2.63127 | 1 | 1 CEACAMP9       | K06500 |
| ENSG00000230531 | 5.13E-15 | -2.63127 | 1 | 1 MTND5P7        | K03883 |
| ENSG00000230532 | 5.13E-15 | -2.63127 | 1 | 1 AC091133.1     | -      |
| ENSG00000230535 | 5.13E-15 | -2.63127 | 1 | 1 BASP1P1        | K17272 |
| ENSG00000230536 | 5.13E-15 | -2.63127 | 1 | 1 RP11-379C10.4  | -      |
| ENSG00000230538 | 5.13E-15 | -2.63127 | 1 | 1 RP3-428A13.1   | K16815 |
| ENSG00000230539 | 5.13E-15 | -2.63127 | 1 | 1 AOAH-IT1       | -      |
| ENSG00000230542 | 5.13E-15 | -2.63127 | 1 | 1 LINC00102      | -      |
| ENSG00000230543 | 5.13E-15 | -2.63127 | 1 | 1 SNX3P1X        | K17918 |
| ENSG00000230546 | 5.13E-15 | -2.63127 | 1 | 1 RP11-393I23.3  | -      |
| ENSG00000230547 | 5.13E-15 | -2.63127 | 1 | 1 HMGB1P11       | K10802 |
| ENSG00000230548 | 5.13E-15 | -2.63127 | 1 | 1 MTND4P27       | -      |
| ENSG00000230549 | 5.13E-15 | -2.63127 | 1 | 1 USP17L1P       | K11845 |
| ENSG00000230552 | 5.13E-15 | -2.63127 | 1 | 1 AC092162.1     | -      |
| ENSG00000230553 | 5.13E-15 | -2.63127 | 1 | 1 RP11-481A12.2  | K08732 |
| ENSG00000230556 | 5.13E-15 | -2.63127 | 1 | 1 AC073264.6     | -      |
| ENSG00000230558 | 5.13E-15 | -2.63127 | 1 | 1 CEACAMP2       | K06499 |
| ENSG00000230559 | 5.13E-15 | -2.63127 | 1 | 1 RPL17P12       | K02880 |
| ENSG00000230563 | 5.13E-15 | -2.63127 | 1 | 1 RP5-828H9.1    | -      |
| ENSG00000230564 | 5.13E-15 | -2.63127 | 1 | 1 CALM1P2        | K02183 |
| ENSG00000230569 | 5.13E-15 | -2.63127 | 1 | 1 AC114763.1     | -      |
| ENSG00000230571 | 5.13E-15 | -2.63127 | 1 | 1 CTD-2533K21.3  | -      |
| ENSG00000230572 | 5.13E-15 | -2.63127 | 1 | 1 AC027612.3     | K09188 |
| ENSG00000230573 | 5.13E-15 | -2.63127 | 1 | 1 RP11-464C19.2  | -      |
| ENSG00000230575 | 5.13E-15 | -2.63127 | 1 | 1 RP11-369F10.2  | -      |
| ENSG00000230576 | 5.13E-15 | -2.63127 | 1 | 1 OR6R1P         | K04257 |
| ENSG00000230578 | 5.13E-15 | -2.63127 | 1 | 1 RP13-228J13.5  | K00474 |
| ENSG00000230580 | 5.13E-15 | -2.63127 | 1 | 1 AC021016.7     | K02885 |
| ENSG00000230582 | 5.13E-15 | -2.63127 | 1 | 1 PPIAL4F        | K12738 |
| ENSG00000230583 | 5.13E-15 | -2.63127 | 1 | 1 GTF2IRD1P1     | K03121 |
| ENSG00000230584 | 5.13E-15 | -2.63127 | 1 | 1 CCT5P2         | K09497 |
| ENSG00000230589 | 5.13E-15 | -2.63127 | 1 | 1 IMP3P1         | -      |
| ENSG00000230594 | 5.13E-15 | -2.63127 | 1 | 1 CT47A4         | -      |
| ENSG00000230595 | 5.13E-15 | -2.63127 | 1 | 1 RSL24D1P2      | K02896 |
| ENSG00000230596 | 5.13E-15 | -2.63127 | 1 | 1 AC112229.4     | K05289 |
| ENSG00000230597 | 5.13E-15 | -2.63127 | 1 | 1 RP3-331H24.4   | -      |
| ENSG00000230598 | 5.13E-15 | -2.63127 | 1 | 1 OR2H4P         | K04257 |
| ENSG00000230599 | 5.13E-15 | -2.63127 | 1 | 1 AC018495.3     | -      |
| ENSG00000230600 | 5.13E-15 | -2.63127 | 1 | 1 RP11-73B2.2    | -      |
| ENSG00000230603 | 5.13E-15 | -2.63127 | 1 | 1 AC011753.6     | K02971 |

|                 |          |          |   |                   |        |
|-----------------|----------|----------|---|-------------------|--------|
| ENSG00000230605 | 5.13E-15 | -2.63127 | 1 | 1 AC006326.5      | -      |
| ENSG00000230607 | 5.13E-15 | -2.63127 | 1 | 1 AC005722.4      | -      |
| ENSG00000230609 | 5.13E-15 | -2.63127 | 1 | 1 RP11-167P22.4   | K02272 |
| ENSG00000230610 | 5.13E-15 | -2.63127 | 1 | 1 AL929472.1      | -      |
| ENSG00000230611 | 5.13E-15 | -2.63127 | 1 | 1 HMGB1P27        | K10802 |
| ENSG00000230612 | 5.13E-15 | -2.63127 | 1 | 1 AC004237.1      | -      |
| ENSG00000230614 | 5.13E-15 | -2.63127 | 1 | 1 AC073958.2      | K10418 |
| ENSG00000230617 | 5.13E-15 | -2.63127 | 1 | 1 AC079987.2      | K02737 |
| ENSG00000230618 | 5.13E-15 | -2.63127 | 1 | 1 H3F3AP3         | K11253 |
| ENSG00000230621 | 5.13E-15 | -2.63127 | 1 | 1 AC080002.1      | K12898 |
| ENSG00000230622 | 5.13E-15 | -2.63127 | 1 | 1 UQCRHP1         | K00416 |
| ENSG00000230627 | 5.13E-15 | -2.63127 | 1 | 1 RP1-155D22.1    | -      |
| ENSG00000230630 | 5.13E-15 | -2.63127 | 1 | 1 DN3M3OS         | -      |
| ENSG00000230633 | 5.13E-15 | -2.63127 | 1 | 1 RP11-37E23.5    | -      |
| ENSG00000230634 | 5.13E-15 | -2.63127 | 1 | 1 RP5-996D20.3    | -      |
| ENSG00000230635 | 5.13E-15 | -2.63127 | 1 | 1 CYP4F60P        | K17726 |
| ENSG00000230636 | 5.13E-15 | -2.63127 | 1 | 1 RPL36P1         | K02920 |
| ENSG00000230638 | 5.13E-15 | -2.63127 | 1 | 1 RP11-486B10.4   | -      |
| ENSG00000230639 | 5.13E-15 | -2.63127 | 1 | 1 VN1R36P         | K04614 |
| ENSG00000230643 | 5.13E-15 | -2.63127 | 1 | 1 LA16c-60G3.5    | -      |
| ENSG00000230645 | 5.13E-15 | -2.63127 | 1 | 1 AC016682.1      | -      |
| ENSG00000230646 | 5.13E-15 | -2.63127 | 1 | 1 KLF2P2          | K14443 |
| ENSG00000230647 | 5.13E-15 | -2.63127 | 1 | 1 AC022816.2      | -      |
| ENSG00000230648 | 5.13E-15 | -2.63127 | 1 | 1 RP3-406P24.3    | -      |
| ENSG00000230649 | 5.13E-15 | -2.63127 | 1 | 1 AC024084.1      | -      |
| ENSG00000230651 | 5.13E-15 | -2.63127 | 1 | 1 RGP4D-AS1       | -      |
| ENSG00000230654 | 5.13E-15 | -2.63127 | 1 | 1 RP11-666G4.2    | K02261 |
| ENSG00000230655 | 5.13E-15 | -2.63127 | 1 | 1 OR7E55P         | K04257 |
| ENSG00000230657 | 5.13E-15 | -2.63127 | 1 | 1 PRB4            | K13911 |
| ENSG00000230659 | 5.13E-15 | -2.63127 | 1 | 1 RP11-466F5.9    | K02898 |
| ENSG00000230661 | 5.13E-15 | -2.63127 | 1 | 1 YY1P1           | K09201 |
| ENSG00000230662 | 5.13E-15 | -2.63127 | 1 | 1 TNPO1P2         | K18752 |
| ENSG00000230663 | 5.13E-15 | -2.63127 | 1 | 1 FAM224B         | -      |
| ENSG00000230665 | 5.13E-15 | -2.63127 | 1 | 1 PRKRIRP1        | -      |
| ENSG00000230668 | 5.13E-15 | -2.63127 | 1 | 1 XXyac-YR29IB3.1 | -      |
| ENSG00000230671 | 5.13E-15 | -2.63127 | 1 | 1 NDUFS5P5        | K03938 |
| ENSG00000230680 | 5.13E-15 | -2.63127 | 1 | 1 AC004869.2      | -      |
| ENSG00000230681 | 5.13E-15 | -2.63127 | 1 | 1 CEACAMP4        | K06499 |
| ENSG00000230682 | 5.13E-15 | -2.63127 | 1 | 1 GRPEL2P3        | K03687 |
| ENSG00000230683 | 5.13E-15 | -2.63127 | 1 | 1 DDTP1           | K10028 |
| ENSG00000230686 | 5.13E-15 | -2.63127 | 1 | 1 AC067945.2      | -      |
| ENSG00000230687 | 5.13E-15 | -2.63127 | 1 | 1 RP5-1114G22.2   | -      |
| ENSG00000230690 | 5.13E-15 | -2.63127 | 1 | 1 AC013402.5      | -      |
| ENSG00000230691 | 5.13E-15 | -2.63127 | 1 | 1 MRPL35P4        | K02916 |
| ENSG00000230695 | 5.13E-15 | -2.63127 | 1 | 1 AC012462.1      | -      |
| ENSG00000230698 | 5.13E-15 | -2.63127 | 1 | 1 CTD-2330K9.2    | -      |
| ENSG00000230702 | 5.13E-15 | -2.63127 | 1 | 1 RP11-681L4.1    | K02910 |
| ENSG00000230703 | 5.13E-15 | -2.63127 | 1 | 1 RP11-293P20.4   | -      |
| ENSG00000230704 | 5.13E-15 | -2.63127 | 1 | 1 RP1-117P20.3    | -      |
| ENSG00000230706 | 5.13E-15 | -2.63127 | 1 | 1 RP5-998G20.1    | -      |
| ENSG00000230707 | 5.13E-15 | -2.63127 | 1 | 1 RP11-364B14.3   | -      |
| ENSG00000230709 | 5.13E-15 | -2.63127 | 1 | 1 AC104024.1      | -      |
| ENSG00000230710 | 5.13E-15 | -2.63127 | 1 | 1 LINC00332       | -      |
| ENSG00000230711 | 5.13E-15 | -2.63127 | 1 | 1 CTAGE13P        | -      |
| ENSG00000230714 | 5.13E-15 | -2.63127 | 1 | 1 RP11-152L7.1    | -      |
| ENSG00000230716 | 5.13E-15 | -2.63127 | 1 | 1 KRT8P7          | K07605 |
| ENSG00000230718 | 5.13E-15 | -2.63127 | 1 | 1 RP11-272L13.2   | -      |
| ENSG00000230720 | 5.13E-15 | -2.63127 | 1 | 1 RP11-14C22.6    | -      |

|                 |          |          |   |                 |        |
|-----------------|----------|----------|---|-----------------|--------|
| ENSG00000230721 | 5.13E-15 | -2.63127 | 1 | 1 RP4-612B15.2  | K02880 |
| ENSG00000230725 | 5.13E-15 | -2.63127 | 1 | 1 RP4-738P15.1  | -      |
| ENSG00000230727 | 5.13E-15 | -2.63127 | 1 | 1 RBMY2WP       | K12885 |
| ENSG00000230728 | 5.13E-15 | -2.63127 | 1 | 1 RP11-240D10.4 | -      |
| ENSG00000230729 | 5.13E-15 | -2.63127 | 1 | 1 RP11-296L22.8 | -      |
| ENSG00000230730 | 5.13E-15 | -2.63127 | 1 | 1 AC074011.2    | -      |
| ENSG00000230735 | 5.13E-15 | -2.63127 | 1 | 1 RP11-413E1.4  | -      |
| ENSG00000230737 | 5.13E-15 | -2.63127 | 1 | 1 AC106870.1    | -      |
| ENSG00000230739 | 5.13E-15 | -2.63127 | 1 | 1 RP11-331H2.4  | K13373 |
| ENSG00000230741 | 5.13E-15 | -2.63127 | 1 | 1 SC22CB-1D7.1  | -      |
| ENSG00000230746 | 5.13E-15 | -2.63127 | 1 | 1 AC006007.1    | -      |
| ENSG00000230748 | 5.13E-15 | -2.63127 | 1 | 1 RP11-541H12.1 | -      |
| ENSG00000230749 | 5.13E-15 | -2.63127 | 1 | 1 MEIS1-AS2     | -      |
| ENSG00000230750 | 5.13E-15 | -2.63127 | 1 | 1 SDAD1P2       | K14856 |
| ENSG00000230751 | 5.13E-15 | -2.63127 | 1 | 1 AC007036.4    | -      |
| ENSG00000230755 | 5.13E-15 | -2.63127 | 1 | 1 RP11-343J3.7  | -      |
| ENSG00000230757 | 5.13E-15 | -2.63127 | 1 | 1 NFU1P1        | -      |
| ENSG00000230759 | 5.13E-15 | -2.63127 | 1 | 1 RP11-153F1.2  | -      |
| ENSG00000230761 | 5.13E-15 | -2.63127 | 1 | 1 RP11-342C24.8 | -      |
| ENSG00000230764 | 5.13E-15 | -2.63127 | 1 | 1 MTND1P4       | K03878 |
| ENSG00000230768 | 5.13E-15 | -2.63127 | 1 | 1 RP11-251P6.1  | -      |
| ENSG00000230769 | 5.13E-15 | -2.63127 | 1 | 1 RP3-408N23.4  | K00861 |
| ENSG00000230772 | 5.13E-15 | -2.63127 | 1 | 1 VN1R108P      | K04614 |
| ENSG00000230777 | 5.13E-15 | -2.63127 | 1 | 1 RP11-318C24.1 | K02980 |
| ENSG00000230779 | 5.13E-15 | -2.63127 | 1 | 1 RP1-140J1.4   | K02941 |
| ENSG00000230781 | 5.13E-15 | -2.63127 | 1 | 1 RP1-215K18.4  | -      |
| ENSG00000230782 | 5.13E-15 | -2.63127 | 1 | 1 RP11-508N12.2 | -      |
| ENSG00000230783 | 5.13E-15 | -2.63127 | 1 | 1 AC009961.2    | K02984 |
| ENSG00000230785 | 5.13E-15 | -2.63127 | 1 | 1 AC006326.3    | -      |
| ENSG00000230788 | 5.13E-15 | -2.63127 | 1 | 1 RP11-560L11.1 | K17616 |
| ENSG00000230789 | 5.13E-15 | -2.63127 | 1 | 1 ARHGAP26-IT1  | -      |
| ENSG00000230790 | 5.13E-15 | -2.63127 | 1 | 1 AC012456.4    | -      |
| ENSG00000230794 | 5.13E-15 | -2.63127 | 1 | 1 AF015720.3    | -      |
| ENSG00000230795 | 5.13E-15 | -2.63127 | 1 | 1 HLA-K         | K06751 |
| ENSG00000230796 | 5.13E-15 | -2.63127 | 1 | 1 RP11-368M16.9 | -      |
| ENSG00000230799 | 5.13E-15 | -2.63127 | 1 | 1 AC007279.2    | K02981 |
| ENSG00000230801 | 5.13E-15 | -2.63127 | 1 | 1 RP11-243J16.8 | -      |
| ENSG00000230803 | 5.13E-15 | -2.63127 | 1 | 1 AC097532.2    | -      |
| ENSG00000230804 | 5.13E-15 | -2.63127 | 1 | 1 RP11-216M21.2 | -      |
| ENSG00000230805 | 5.13E-15 | -2.63127 | 1 | 1 AL132709.1    | -      |
| ENSG00000230806 | 5.13E-15 | -2.63127 | 1 | 1 RP11-343N15.1 | -      |
| ENSG00000230809 | 5.13E-15 | -2.63127 | 1 | 1 RP11-309P22.1 | K02991 |
| ENSG00000230813 | 5.13E-15 | -2.63127 | 1 | 1 RP11-690C23.5 | K05150 |
| ENSG00000230814 | 5.13E-15 | -2.63127 | 1 | 1 USP9YP24      | -      |
| ENSG00000230815 | 5.13E-15 | -2.63127 | 1 | 1 RP11-490I4.3  | -      |
| ENSG00000230817 | 5.13E-15 | -2.63127 | 1 | 1 RP4-601K24.1  | -      |
| ENSG00000230818 | 5.13E-15 | -2.63127 | 1 | 1 MTND2P16      | K03879 |
| ENSG00000230819 | 5.13E-15 | -2.63127 | 1 | 1 ZNF736P5Y     | K09228 |
| ENSG00000230820 | 5.13E-15 | -2.63127 | 1 | 1 AC000362.1    | -      |
| ENSG00000230821 | 5.13E-15 | -2.63127 | 1 | 1 KB-288A10.17  | K14964 |
| ENSG00000230823 | 5.13E-15 | -2.63127 | 1 | 1 CBX1P1        | K11585 |
| ENSG00000230826 | 5.13E-15 | -2.63127 | 1 | 1 RP11-417B4.2  | -      |
| ENSG00000230828 | 5.13E-15 | -2.63127 | 1 | 1 RP11-492I2.1  | -      |
| ENSG00000230829 | 5.13E-15 | -2.63127 | 1 | 1 CTD-2186M15.1 | K02901 |
| ENSG00000230830 | 5.13E-15 | -2.63127 | 1 | 1 ARPP21-AS1    | -      |
| ENSG00000230831 | 5.13E-15 | -2.63127 | 1 | 1 AC007349.7    | -      |
| ENSG00000230833 | 5.13E-15 | -2.63127 | 1 | 1 RPEP3         | K01783 |
| ENSG00000230834 | 5.13E-15 | -2.63127 | 1 | 1 AC068580.7    | -      |

|                 |          |          |   |                   |        |
|-----------------|----------|----------|---|-------------------|--------|
| ENSG00000230837 | 5.13E-15 | -2.63127 | 1 | 1 RPL31P2         | K02910 |
| ENSG00000230838 | 5.13E-15 | -2.63127 | 1 | 1 AC093850.2      | -      |
| ENSG00000230839 | 5.13E-15 | -2.63127 | 1 | 1 RP5-968J1.1     | -      |
| ENSG00000230840 | 5.13E-15 | -2.63127 | 1 | 1 AC097463.2      | -      |
| ENSG00000230841 | 5.13E-15 | -2.63127 | 1 | 1 RP5-915N17.3    | K02893 |
| ENSG00000230843 | 5.13E-15 | -2.63127 | 1 | 1 RP11-380D15.3   | -      |
| ENSG00000230845 | 5.13E-15 | -2.63127 | 1 | 1 RP11-392A23.5   | K00799 |
| ENSG00000230846 | 5.13E-15 | -2.63127 | 1 | 1 RP11-383M4.2    | -      |
| ENSG00000230847 | 5.13E-15 | -2.63127 | 1 | 1 RP11-195E2.1    | K06088 |
| ENSG00000230848 | 5.13E-15 | -2.63127 | 1 | 1 RP11-379C10.1   | -      |
| ENSG00000230851 | 5.13E-15 | -2.63127 | 1 | 1 AP006294.2      | K04257 |
| ENSG00000230852 | 5.13E-15 | -2.63127 | 1 | 1 RP11-51G5.1     | -      |
| ENSG00000230853 | 5.13E-15 | -2.63127 | 1 | 1 AC004159.1      | K02866 |
| ENSG00000230854 | 5.13E-15 | -2.63127 | 1 | 1 USP9YP20        | K11840 |
| ENSG00000230856 | 5.13E-15 | -2.63127 | 1 | 1 AC138649.1      | -      |
| ENSG00000230857 | 5.13E-15 | -2.63127 | 1 | 1 RP11-318K12.2   | -      |
| ENSG00000230859 | 5.13E-15 | -2.63127 | 1 | 1 YRDPC3          | -      |
| ENSG00000230860 | 5.13E-15 | -2.63127 | 1 | 1 CCNB1IP1P2      | K10639 |
| ENSG00000230863 | 5.13E-15 | -2.63127 | 1 | 1 RP4-595K12.2    | K13024 |
| ENSG00000230864 | 5.13E-15 | -2.63127 | 1 | 1 RP5-936J12.1    | -      |
| ENSG00000230865 | 5.13E-15 | -2.63127 | 1 | 1 TSEN15P1        | K15324 |
| ENSG00000230866 | 5.13E-15 | -2.63127 | 1 | 1 CTA-342B11.2    | -      |
| ENSG00000230867 | 5.13E-15 | -2.63127 | 1 | 1 RP11-462B18.1   | K02949 |
| ENSG00000230871 | 5.13E-15 | -2.63127 | 1 | 1 RPS6P23         | -      |
| ENSG00000230873 | 5.13E-15 | -2.63127 | 1 | 1 STMND1          | -      |
| ENSG00000230876 | 5.13E-15 | -2.63127 | 1 | 1 LINC00486       | -      |
| ENSG00000230879 | 5.13E-15 | -2.63127 | 1 | 1 RBMX2P4         | -      |
| ENSG00000230881 | 5.13E-15 | -2.63127 | 1 | 1 RP11-486B10.3   | -      |
| ENSG00000230886 | 5.13E-15 | -2.63127 | 1 | 1 HMGB1P25        | K10802 |
| ENSG00000230889 | 5.13E-15 | -2.63127 | 1 | 1 SHC1P1          | K06279 |
| ENSG00000230891 | 5.13E-15 | -2.63127 | 1 | 1 LINC00692       | -      |
| ENSG00000230898 | 5.13E-15 | -2.63127 | 1 | 1 RP11-9L18.3     | -      |
| ENSG00000230899 | 5.13E-15 | -2.63127 | 1 | 1 MAGEA8-AS1      | -      |
| ENSG00000230904 | 5.13E-15 | -2.63127 | 1 | 1 XKRYP2          | -      |
| ENSG00000230906 | 5.13E-15 | -2.63127 | 1 | 1 AC023115.1      | -      |
| ENSG00000230908 | 5.13E-15 | -2.63127 | 1 | 1 XXyac-YX60D10.1 | -      |
| ENSG00000230910 | 5.13E-15 | -2.63127 | 1 | 1 RP3-525N10.2    | -      |
| ENSG00000230911 | 5.13E-15 | -2.63127 | 1 | 1 PPIHP1          | K09567 |
| ENSG00000230913 | 5.13E-15 | -2.63127 | 1 | 1 NPM1P51         | K11276 |
| ENSG00000230916 | 5.13E-15 | -2.63127 | 1 | 1 RP11-10B2.1     | K02256 |
| ENSG00000230918 | 5.13E-15 | -2.63127 | 1 | 1 AC008063.2      | -      |
| ENSG00000230920 | 5.13E-15 | -2.63127 | 1 | 1 RP11-527D15.1   | -      |
| ENSG00000230921 | 5.13E-15 | -2.63127 | 1 | 1 HAO2-IT1        | -      |
| ENSG00000230922 | 5.13E-15 | -2.63127 | 1 | 1 RP4-753M9.1     | -      |
| ENSG00000230923 | 5.13E-15 | -2.63127 | 1 | 1 LINC00309       | -      |
| ENSG00000230925 | 5.13E-15 | -2.63127 | 1 | 1 RP11-176F3.7    | -      |
| ENSG00000230926 | 5.13E-15 | -2.63127 | 1 | 1 RP11-104D21.2   | K01896 |
| ENSG00000230928 | 5.13E-15 | -2.63127 | 1 | 1 RP11-34A14.3    | -      |
| ENSG00000230931 | 5.13E-15 | -2.63127 | 1 | 1 GXYLT1P1        | K13676 |
| ENSG00000230932 | 5.13E-15 | -2.63127 | 1 | 1 RP5-947P14.2    | K06097 |
| ENSG00000230934 | 5.13E-15 | -2.63127 | 1 | 1 RP11-402P6.2    | -      |
| ENSG00000230935 | 5.13E-15 | -2.63127 | 1 | 1 RPS3P1          | K02985 |
| ENSG00000230936 | 5.13E-15 | -2.63127 | 1 | 1 RP11-775L16.1   | K14570 |
| ENSG00000230937 | 5.13E-15 | -2.63127 | 1 | 1 MIR205HG        | -      |
| ENSG00000230940 | 5.13E-15 | -2.63127 | 1 | 1 RP11-32B11.2    | -      |
| ENSG00000230941 | 5.13E-15 | -2.63127 | 1 | 1 AC002386.1      | -      |
| ENSG00000230942 | 5.13E-15 | -2.63127 | 1 | 1 HMGN1P5         | -      |
| ENSG00000230944 | 5.13E-15 | -2.63127 | 1 | 1 AC026202.5      | -      |



|                 |          |          |   |                  |        |
|-----------------|----------|----------|---|------------------|--------|
| ENSG00000230945 | 5.13E-15 | -2.63127 | 1 | 1 RP11-394O9.1   | -      |
| ENSG00000230947 | 5.13E-15 | -2.63127 | 1 | 1 AP000356.2     | -      |
| ENSG00000230948 | 5.13E-15 | -2.63127 | 1 | 1 AP001331.1     | K11479 |
| ENSG00000230950 | 5.13E-15 | -2.63127 | 1 | 1 MTND2P21       | K03879 |
| ENSG00000230951 | 5.13E-15 | -2.63127 | 1 | 1 RP11-573D15.6  | K15307 |
| ENSG00000230955 | 5.13E-15 | -2.63127 | 1 | 1 RP11-109P14.10 | -      |
| ENSG00000230956 | 5.13E-15 | -2.63127 | 1 | 1 RP3-452M16.1   | K10364 |
| ENSG00000230958 | 5.13E-15 | -2.63127 | 1 | 1 AC093166.4     | K02976 |
| ENSG00000230960 | 5.13E-15 | -2.63127 | 1 | 1 RP5-1086L22.1  | -      |
| ENSG00000230962 | 5.13E-15 | -2.63127 | 1 | 1 RP11-113E21.1  | -      |
| ENSG00000230965 | 5.13E-15 | -2.63127 | 1 | 1 SNX18P13       | K17923 |
| ENSG00000230967 | 5.13E-15 | -2.63127 | 1 | 1 RP11-107I14.5  | -      |
| ENSG00000230968 | 5.13E-15 | -2.63127 | 1 | 1 AC084149.1     | -      |
| ENSG00000230969 | 5.13E-15 | -2.63127 | 1 | 1 AC104024.2     | -      |
| ENSG00000230970 | 5.13E-15 | -2.63127 | 1 | 1 HHATL-AS1      | -      |
| ENSG00000230971 | 5.13E-15 | -2.63127 | 1 | 1 AC005703.3     | -      |
| ENSG00000230972 | 5.13E-15 | -2.63127 | 1 | 1 AP001255.2     | -      |
| ENSG00000230973 | 5.13E-15 | -2.63127 | 1 | 1 RP1-154J13.2   | -      |
| ENSG00000230975 | 5.13E-15 | -2.63127 | 1 | 1 AC084193.1     | -      |
| ENSG00000230977 | 5.13E-15 | -2.63127 | 1 | 1 AC023274.6     | -      |
| ENSG00000230980 | 5.13E-15 | -2.63127 | 1 | 1 RPL36AP39      | K02929 |
| ENSG00000230981 | 5.13E-15 | -2.63127 | 1 | 1 AC006035.1     | -      |
| ENSG00000230986 | 5.13E-15 | -2.63127 | 1 | 1 DDX3YP2        | K11594 |
| ENSG00000230987 | 5.13E-15 | -2.63127 | 1 | 1 RP11-113I24.1  | K18995 |
| ENSG00000230988 | 5.13E-15 | -2.63127 | 1 | 1 RP11-661D19.1  | K02893 |
| ENSG00000230990 | 5.13E-15 | -2.63127 | 1 | 1 RP4-734C18.1   | -      |
| ENSG00000230991 | 5.13E-15 | -2.63127 | 1 | 1 AC092625.1     | -      |
| ENSG00000230992 | 5.13E-15 | -2.63127 | 1 | 1 FAM201B        | -      |
| ENSG00000230993 | 5.13E-15 | -2.63127 | 1 | 1 RPL12P15       | K02870 |
| ENSG00000230994 | 5.13E-15 | -2.63127 | 1 | 1 FGFR3P1        | K05094 |
| ENSG00000230997 | 5.13E-15 | -2.63127 | 1 | 1 RAB42P1        | K07929 |
| ENSG00000230998 | 5.13E-15 | -2.63127 | 1 | 1 RP11-14C22.3   | -      |
| ENSG00000230999 | 5.13E-15 | -2.63127 | 1 | 1 MTND5P8        | K03883 |
| ENSG00000231001 | 5.13E-15 | -2.63127 | 1 | 1 CCNB1IP1P3     | K10639 |
| ENSG00000231004 | 5.13E-15 | -2.63127 | 1 | 1 CECR9          | -      |
| ENSG00000231005 | 5.13E-15 | -2.63127 | 1 | 1 RP3-481F12.1   | K02924 |
| ENSG00000231009 | 5.13E-15 | -2.63127 | 1 | 1 CUBNP1         | K14616 |
| ENSG00000231011 | 5.13E-15 | -2.63127 | 1 | 1 RP11-494I9.1   | -      |
| ENSG00000231013 | 5.13E-15 | -2.63127 | 1 | 1 AC013275.2     | -      |
| ENSG00000231015 | 5.13E-15 | -2.63127 | 1 | 1 RP5-860P4.2    | -      |
| ENSG00000231017 | 5.13E-15 | -2.63127 | 1 | 1 AC013404.1     | K02978 |
| ENSG00000231018 | 5.13E-15 | -2.63127 | 1 | 1 EIF4A1P3       | K03257 |
| ENSG00000231019 | 5.13E-15 | -2.63127 | 1 | 1 RP11-545P6.2   | -      |
| ENSG00000231020 | 5.13E-15 | -2.63127 | 1 | 1 RP11-357J22.1  | -      |
| ENSG00000231022 | 5.13E-15 | -2.63127 | 1 | 1 RPS3AP9        | K02984 |
| ENSG00000231023 | 5.13E-15 | -2.63127 | 1 | 1 LINC00326      | -      |
| ENSG00000231024 | 5.13E-15 | -2.63127 | 1 | 1 AC092431.3     | -      |
| ENSG00000231026 | 5.13E-15 | -2.63127 | 1 | 1 XKRYP4         | -      |
| ENSG00000231029 | 5.13E-15 | -2.63127 | 1 | 1 RP3-455J7.3    | K02964 |
| ENSG00000231031 | 5.13E-15 | -2.63127 | 1 | 1 AC008271.1     | -      |
| ENSG00000231032 | 5.13E-15 | -2.63127 | 1 | 1 AC114814.2     | K16801 |
| ENSG00000231034 | 5.13E-15 | -2.63127 | 1 | 1 RP11-346K17.3  | -      |
| ENSG00000231039 | 5.13E-15 | -2.63127 | 1 | 1 RP11-445P17.3  | -      |
| ENSG00000231040 | 5.13E-15 | -2.63127 | 1 | 1 AC103881.1     | -      |
| ENSG00000231046 | 5.13E-15 | -2.63127 | 1 | 1 RP11-428F8.2   | -      |
| ENSG00000231047 | 5.13E-15 | -2.63127 | 1 | 1 GCNT1P3        | -      |
| ENSG00000231049 | 5.13E-15 | -2.63127 | 1 | 1 OR52B5P        | K04257 |
| ENSG00000231051 | 5.13E-15 | -2.63127 | 1 | 1 USP17L28       | K11845 |

|                 |          |          |   |                 |        |
|-----------------|----------|----------|---|-----------------|--------|
| ENSG00000231052 | 5.13E-15 | -2.63127 | 1 | 1 RP11-91N2.3   | --     |
| ENSG00000231054 | 5.13E-15 | -2.63127 | 1 | 1 AC009236.2    | --     |
| ENSG00000231056 | 5.13E-15 | -2.63127 | 1 | 1 RP1-290I10.5  | --     |
| ENSG00000231058 | 5.13E-15 | -2.63127 | 1 | 1 MSANTD2P1     | --     |
| ENSG00000231060 | 5.13E-15 | -2.63127 | 1 | 1 FARSBP1       | K01890 |
| ENSG00000231061 | 5.13E-15 | -2.63127 | 1 | 1 LINC00395     | --     |
| ENSG00000231062 | 5.13E-15 | -2.63127 | 1 | 1 AC103563.9    | --     |
| ENSG00000231063 | 5.13E-15 | -2.63127 | 1 | 1 AC006994.1    | K02934 |
| ENSG00000231068 | 5.13E-15 | -2.63127 | 1 | 1 KRTAP21-3     | --     |
| ENSG00000231069 | 5.13E-15 | -2.63127 | 1 | 1 BX842568.4    | --     |
| ENSG00000231070 | 5.13E-15 | -2.63127 | 1 | 1 OR52Y1P       | --     |
| ENSG00000231071 | 5.13E-15 | -2.63127 | 1 | 1 RP5-1068H6.1  | K01823 |
| ENSG00000231072 | 5.13E-15 | -2.63127 | 1 | 1 GAPDHP64      | K00134 |
| ENSG00000231074 | 5.13E-15 | -2.63127 | 1 | 1 HCG18         | --     |
| ENSG00000231078 | 5.13E-15 | -2.63127 | 1 | 1 RP11-560A15.4 | --     |
| ENSG00000231079 | 5.13E-15 | -2.63127 | 1 | 1 AC105402.4    | --     |
| ENSG00000231080 | 5.13E-15 | -2.63127 | 1 | 1 RP11-342H21.2 | --     |
| ENSG00000231081 | 5.13E-15 | -2.63127 | 1 | 1 RP4-760C5.3   | --     |
| ENSG00000231082 | 5.13E-15 | -2.63127 | 1 | 1 RP11-514F8.2  | --     |
| ENSG00000231083 | 5.13E-15 | -2.63127 | 1 | 1 AC011747.6    | --     |
| ENSG00000231086 | 5.13E-15 | -2.63127 | 1 | 1 TSSK1A        | K08811 |
| ENSG00000231087 | 5.13E-15 | -2.63127 | 1 | 1 FDPSP7        | K00787 |
| ENSG00000231090 | 5.13E-15 | -2.63127 | 1 | 1 RP11-101C11.1 | --     |
| ENSG00000231091 | 5.13E-15 | -2.63127 | 1 | 1 AC138783.13   | --     |
| ENSG00000231092 | 5.13E-15 | -2.63127 | 1 | 1 AC012513.6    | --     |
| ENSG00000231093 | 5.13E-15 | -2.63127 | 1 | 1 RP13-150K15.1 | K00555 |
| ENSG00000231095 | 5.13E-15 | -2.63127 | 1 | 1 GYG1P3        | K00750 |
| ENSG00000231096 | 5.13E-15 | -2.63127 | 1 | 1 AC015726.1    | K03960 |
| ENSG00000231098 | 5.13E-15 | -2.63127 | 1 | 1 AC008154.4    | --     |
| ENSG00000231099 | 5.13E-15 | -2.63127 | 1 | 1 BMS1P19       | K14569 |
| ENSG00000231100 | 5.13E-15 | -2.63127 | 1 | 1 RP11-740C1.2  | --     |
| ENSG00000231102 | 5.13E-15 | -2.63127 | 1 | 1 RP11-298J23.5 | --     |
| ENSG00000231103 | 5.13E-15 | -2.63127 | 1 | 1 RP5-845O24.3  | --     |
| ENSG00000231106 | 5.13E-15 | -2.63127 | 1 | 1 AP000688.8    | --     |
| ENSG00000231107 | 5.13E-15 | -2.63127 | 1 | 1 RP11-389K14.3 | --     |
| ENSG00000231108 | 5.13E-15 | -2.63127 | 1 | 1 RP11-390F4.9  | --     |
| ENSG00000231110 | 5.13E-15 | -2.63127 | 1 | 1 AC004070.1    | --     |
| ENSG00000231112 | 5.13E-15 | -2.63127 | 1 | 1 MTHFD2P3      | K13403 |
| ENSG00000231114 | 5.13E-15 | -2.63127 | 1 | 1 AC078842.4    | --     |
| ENSG00000231120 | 5.13E-15 | -2.63127 | 1 | 1 BTF3P10       | K01527 |
| ENSG00000231121 | 5.13E-15 | -2.63127 | 1 | 1 RP1-34H18.1   | --     |
| ENSG00000231122 | 5.13E-15 | -2.63127 | 1 | 1 FAM25E        | --     |
| ENSG00000231123 | 5.13E-15 | -2.63127 | 1 | 1 SPATA20P1     | --     |
| ENSG00000231124 | 5.13E-15 | -2.63127 | 1 | 1 UBE2V1P11     | K10704 |
| ENSG00000231128 | 5.13E-15 | -2.63127 | 1 | 1 RP5-1073O3.2  | --     |
| ENSG00000231130 | 5.13E-15 | -2.63127 | 1 | 1 HLA-T         | K06751 |
| ENSG00000231132 | 5.13E-15 | -2.63127 | 1 | 1 RP11-40C11.2  | --     |
| ENSG00000231133 | 5.13E-15 | -2.63127 | 1 | 1 HAR1B         | --     |
| ENSG00000231136 | 5.13E-15 | -2.63127 | 1 | 1 AP000705.6    | K11973 |
| ENSG00000231137 | 5.13E-15 | -2.63127 | 1 | 1 RBM22P5       | K12872 |
| ENSG00000231138 | 5.13E-15 | -2.63127 | 1 | 1 RP11-391M7.3  | --     |
| ENSG00000231139 | 5.13E-15 | -2.63127 | 1 | 1 AC104843.4    | K02969 |
| ENSG00000231140 | 5.13E-15 | -2.63127 | 1 | 1 RP11-347J14.7 | --     |
| ENSG00000231141 | 5.13E-15 | -2.63127 | 1 | 1 TTTY3         | --     |
| ENSG00000231143 | 5.13E-15 | -2.63127 | 1 | 1 RP3-463P15.1  | --     |
| ENSG00000231144 | 5.13E-15 | -2.63127 | 1 | 1 EEF1A1P40     | K03231 |
| ENSG00000231145 | 5.13E-15 | -2.63127 | 1 | 1 AC013468.1    | --     |
| ENSG00000231147 | 5.13E-15 | -2.63127 | 1 | 1 ARHGAP42P2    | --     |

|                 |          |          |   |                 |        |
|-----------------|----------|----------|---|-----------------|--------|
| ENSG00000231148 | 5.13E-15 | -2.63127 | 1 | 1 HMGB1P7       | K10802 |
| ENSG00000231149 | 5.13E-15 | -2.63127 | 1 | 1 RP11-10J18.3  | -      |
| ENSG00000231150 | 5.13E-15 | -2.63127 | 1 | 1 RP1-207H1.3   | -      |
| ENSG00000231152 | 5.13E-15 | -2.63127 | 1 | 1 MTND2P15      | -      |
| ENSG00000231153 | 5.13E-15 | -2.63127 | 1 | 1 AC002429.4    | -      |
| ENSG00000231156 | 5.13E-15 | -2.63127 | 1 | 1 AC093702.1    | -      |
| ENSG00000231158 | 5.13E-15 | -2.63127 | 1 | 1 PTP4A1P1      | K18041 |
| ENSG00000231159 | 5.13E-15 | -2.63127 | 1 | 1 OFD1P8Y       | K16480 |
| ENSG00000231162 | 5.13E-15 | -2.63127 | 1 | 1 COX11P1       | K02258 |
| ENSG00000231163 | 5.13E-15 | -2.63127 | 1 | 1 RP5-1007G16.1 | -      |
| ENSG00000231164 | 5.13E-15 | -2.63127 | 1 | 1 RPL7P56       | K02937 |
| ENSG00000231165 | 5.13E-15 | -2.63127 | 1 | 1 TRBV26OR9-2   | -      |
| ENSG00000231166 | 5.13E-15 | -2.63127 | 1 | 1 TUBB4BP6      | K07375 |
| ENSG00000231169 | 5.13E-15 | -2.63127 | 1 | 1 EEF1B2P1      | K03232 |
| ENSG00000231175 | 5.13E-15 | -2.63127 | 1 | 1 RP11-463J7.2  | -      |
| ENSG00000231178 | 5.13E-15 | -2.63127 | 1 | 1 RP11-125D12.1 | -      |
| ENSG00000231182 | 5.13E-15 | -2.63127 | 1 | 1 RP11-423O2.7  | -      |
| ENSG00000231183 | 5.13E-15 | -2.63127 | 1 | 1 AC007003.1    | -      |
| ENSG00000231184 | 5.13E-15 | -2.63127 | 1 | 1 FAM58DP       | -      |
| ENSG00000231189 | 5.13E-15 | -2.63127 | 1 | 1 AC013448.1    | -      |
| ENSG00000231192 | 5.13E-15 | -2.63127 | 1 | 1 OR5H1         | K04257 |
| ENSG00000231194 | 5.13E-15 | -2.63127 | 1 | 1 FARP1-AS1     | -      |
| ENSG00000231195 | 5.13E-15 | -2.63127 | 1 | 1 IFNA11P       | -      |
| ENSG00000231196 | 5.13E-15 | -2.63127 | 1 | 1 RP11-495P10.8 | -      |
| ENSG00000231198 | 5.13E-15 | -2.63127 | 1 | 1 AC004987.10   | -      |
| ENSG00000231199 | 5.13E-15 | -2.63127 | 1 | 1 MTND5P19      | K03883 |
| ENSG00000231200 | 5.13E-15 | -2.63127 | 1 | 1 AC068490.2    | -      |
| ENSG00000231201 | 5.13E-15 | -2.63127 | 1 | 1 AF127577.11   | -      |
| ENSG00000231202 | 5.13E-15 | -2.63127 | 1 | 1 TRGVB         | -      |
| ENSG00000231204 | 5.13E-15 | -2.63127 | 1 | 1 AC011752.1    | -      |
| ENSG00000231205 | 5.13E-15 | -2.63127 | 1 | 1 ZNF826P       | K09228 |
| ENSG00000231206 | 5.13E-15 | -2.63127 | 1 | 1 HNRNPA1P25    | K12741 |
| ENSG00000231207 | 5.13E-15 | -2.63127 | 1 | 1 RP1-144C9.2   | K02974 |
| ENSG00000231208 | 5.13E-15 | -2.63127 | 1 | 1 RP4-583P15.11 | -      |
| ENSG00000231209 | 5.13E-15 | -2.63127 | 1 | 1 GLUD1P6       | K00261 |
| ENSG00000231210 | 5.13E-15 | -2.63127 | 1 | 1 AC006159.3    | -      |
| ENSG00000231211 | 5.13E-15 | -2.63127 | 1 | 1 RPL17P49      | K02880 |
| ENSG00000231212 | 5.13E-15 | -2.63127 | 1 | 1 RP11-111F5.3  | -      |
| ENSG00000231213 | 5.13E-15 | -2.63127 | 1 | 1 PLSCR5        | -      |
| ENSG00000231216 | 5.13E-15 | -2.63127 | 1 | 1 GS1-600G8.3   | -      |
| ENSG00000231217 | 5.13E-15 | -2.63127 | 1 | 1 RP11-1M18.1   | -      |
| ENSG00000231219 | 5.13E-15 | -2.63127 | 1 | 1 RP11-219C24.8 | -      |
| ENSG00000231221 | 5.13E-15 | -2.63127 | 1 | 1 AC023672.2    | -      |
| ENSG00000231222 | 5.13E-15 | -2.63127 | 1 | 1 ARF4P4        | K07939 |
| ENSG00000231226 | 5.13E-15 | -2.63127 | 1 | 1 TRIM31-AS1    | -      |
| ENSG00000231227 | 5.13E-15 | -2.63127 | 1 | 1 RP11-85O21.4  | -      |
| ENSG00000231228 | 5.13E-15 | -2.63127 | 1 | 1 CTD-2593A12.4 | -      |
| ENSG00000231231 | 5.13E-15 | -2.63127 | 1 | 1 AP001422.3    | -      |
| ENSG00000231232 | 5.13E-15 | -2.63127 | 1 | 1 RP11-548K12.1 | -      |
| ENSG00000231235 | 5.13E-15 | -2.63127 | 1 | 1 RP11-75A9.1   | K12864 |
| ENSG00000231236 | 5.13E-15 | -2.63127 | 1 | 1 AP001604.3    | -      |
| ENSG00000231237 | 5.13E-15 | -2.63127 | 1 | 1 OR6K1P        | K12870 |
| ENSG00000231238 | 5.13E-15 | -2.63127 | 1 | 1 LINC00349     | -      |
| ENSG00000231241 | 5.13E-15 | -2.63127 | 1 | 1 RPS3AP3       | K02984 |
| ENSG00000231242 | 5.13E-15 | -2.63127 | 1 | 1 RP11-87H9.3   | -      |
| ENSG00000231243 | 5.13E-15 | -2.63127 | 1 | 1 RP11-134J21.1 | -      |
| ENSG00000231244 | 5.13E-15 | -2.63127 | 1 | 1 PSMC1P3       | K03062 |
| ENSG00000231246 | 5.13E-15 | -2.63127 | 1 | 1 RP5-965F6.2   | -      |

|                 |          |          |   |                 |        |
|-----------------|----------|----------|---|-----------------|--------|
| ENSG00000231248 | 5.13E-15 | -2.63127 | 1 | 1 RP11-160N1.9  | -      |
| ENSG00000231251 | 5.13E-15 | -2.63127 | 1 | 1 RP3-357I16.1  | K13120 |
| ENSG00000231252 | 5.13E-15 | -2.63127 | 1 | 1 RP11-436K8.1  | -      |
| ENSG00000231253 | 5.13E-15 | -2.63127 | 1 | 1 RP1-302D9.2   | -      |
| ENSG00000231254 | 5.13E-15 | -2.63127 | 1 | 1 PCED1CP       | -      |
| ENSG00000231255 | 5.13E-15 | -2.63127 | 1 | 1 AC005009.1    | -      |
| ENSG00000231258 | 5.13E-15 | -2.63127 | 1 | 1 ZSWIM5P2      | K05060 |
| ENSG00000231261 | 5.13E-15 | -2.63127 | 1 | 1 HMGN2P10      | K11300 |
| ENSG00000231264 | 5.13E-15 | -2.63127 | 1 | 1 RP11-73B2.7   | K08845 |
| ENSG00000231265 | 5.13E-15 | -2.63127 | 1 | 1 TRERNA1       | -      |
| ENSG00000231266 | 5.13E-15 | -2.63127 | 1 | 1 AC010745.3    | -      |
| ENSG00000231267 | 5.13E-15 | -2.63127 | 1 | 1 PPIAL4E       | K12738 |
| ENSG00000231270 | 5.13E-15 | -2.63127 | 1 | 1 RP13-347D8.1  | K18623 |
| ENSG00000231271 | 5.13E-15 | -2.63127 | 1 | 1 AP000350.8    | K00799 |
| ENSG00000231272 | 5.13E-15 | -2.63127 | 1 | 1 RP4-799P18.4  | -      |
| ENSG00000231273 | 5.13E-15 | -2.63127 | 1 | 1 RP11-343D24.2 | -      |
| ENSG00000231276 | 5.13E-15 | -2.63127 | 1 | 1 E2F4P1        | K04682 |
| ENSG00000231278 | 5.13E-15 | -2.63127 | 1 | 1 OR9S24P       | K04257 |
| ENSG00000231280 | 5.13E-15 | -2.63127 | 1 | 1 SALL4P6       | -      |
| ENSG00000231283 | 5.13E-15 | -2.63127 | 1 | 1 RP11-472D17.6 | -      |
| ENSG00000231290 | 5.13E-15 | -2.63127 | 1 | 1 APCDD1L-AS1   | -      |
| ENSG00000231291 | 5.13E-15 | -2.63127 | 1 | 1 RP11-445O3.1  | -      |
| ENSG00000231292 | 5.13E-15 | -2.63127 | 1 | 1 IGKV1OR2-108  | -      |
| ENSG00000231293 | 5.13E-15 | -2.63127 | 1 | 1 RPL36AP6      | K02929 |
| ENSG00000231294 | 5.13E-15 | -2.63127 | 1 | 1 AC006994.2    | -      |
| ENSG00000231295 | 5.13E-15 | -2.63127 | 1 | 1 RP4-797C5.2   | -      |
| ENSG00000231297 | 5.13E-15 | -2.63127 | 1 | 1 SNORD45       | -      |
| ENSG00000231299 | 5.13E-15 | -2.63127 | 1 | 1 RP11-419M24.6 | K16941 |
| ENSG00000231300 | 5.13E-15 | -2.63127 | 1 | 1 EZH2P1        | K11430 |
| ENSG00000231301 | 5.13E-15 | -2.63127 | 1 | 1 RPL13AP       | K02872 |
| ENSG00000231302 | 5.13E-15 | -2.63127 | 1 | 1 RPL36P2       | K02920 |
| ENSG00000231304 | 5.13E-15 | -2.63127 | 1 | 1 AC107622.1    | -      |
| ENSG00000231307 | 5.13E-15 | -2.63127 | 1 | 1 RPS3P2        | K02985 |
| ENSG00000231310 | 5.13E-15 | -2.63127 | 1 | 1 TBL1XR1-AS1   | -      |
| ENSG00000231311 | 5.13E-15 | -2.63127 | 1 | 1 PRYP2         | -      |
| ENSG00000231315 | 5.13E-15 | -2.63127 | 1 | 1 AC107613.1    | K11804 |
| ENSG00000231316 | 5.13E-15 | -2.63127 | 1 | 1 RP11-134L4.2  | -      |
| ENSG00000231317 | 5.13E-15 | -2.63127 | 1 | 1 RP11-310H4.6  | K17299 |
| ENSG00000231322 | 5.13E-15 | -2.63127 | 1 | 1 RPL13AP17     | K02872 |
| ENSG00000231326 | 5.13E-15 | -2.63127 | 1 | 1 RP11-69C17.4  | -      |
| ENSG00000231327 | 5.13E-15 | -2.63127 | 1 | 1 AC016700.5    | -      |
| ENSG00000231328 | 5.13E-15 | -2.63127 | 1 | 1 TPT1P7        | -      |
| ENSG00000231329 | 5.13E-15 | -2.63127 | 1 | 1 RP1-225E12.2  | -      |
| ENSG00000231331 | 5.13E-15 | -2.63127 | 1 | 1 AC103563.2    | -      |
| ENSG00000231332 | 5.13E-15 | -2.63127 | 1 | 1 OOEP-AS1      | -      |
| ENSG00000231334 | 5.13E-15 | -2.63127 | 1 | 1 AC104781.1    | -      |
| ENSG00000231336 | 5.13E-15 | -2.63127 | 1 | 1 AC017006.3    | -      |
| ENSG00000231340 | 5.13E-15 | -2.63127 | 1 | 1 ACTG1P10      | K05692 |
| ENSG00000231342 | 5.13E-15 | -2.63127 | 1 | 1 ATF4P2        | K04374 |
| ENSG00000231349 | 5.13E-15 | -2.63127 | 1 | 1 RP11-444C12.1 | -      |
| ENSG00000231353 | 5.13E-15 | -2.63127 | 1 | 1 RP11-5P18.3   | K07752 |
| ENSG00000231355 | 5.13E-15 | -2.63127 | 1 | 1 AP000302.58   | -      |
| ENSG00000231356 | 5.13E-15 | -2.63127 | 1 | 1 RP13-238N7.2  | -      |
| ENSG00000231357 | 5.13E-15 | -2.63127 | 1 | 1 AC006028.11   | K09550 |
| ENSG00000231358 | 5.13E-15 | -2.63127 | 1 | 1 RP11-442J17.3 | -      |
| ENSG00000231359 | 5.13E-15 | -2.63127 | 1 | 1 AC072052.7    | K10949 |
| ENSG00000231361 | 5.13E-15 | -2.63127 | 1 | 1 CTD-3105H18.5 | K02980 |
| ENSG00000231362 | 5.13E-15 | -2.63127 | 1 | 1 RP11-715I4.1  | K02924 |

|                 |          |          |   |                    |        |
|-----------------|----------|----------|---|--------------------|--------|
| ENSG00000231363 | 5.13E-15 | -2.63127 | 1 | 1 RP11-148B18.1    | -      |
| ENSG00000231364 | 5.13E-15 | -2.63127 | 1 | 1 RP11-413G15.1    | -      |
| ENSG00000231366 | 5.13E-15 | -2.63127 | 1 | 1 RP11-399N22.3    | K02976 |
| ENSG00000231368 | 5.13E-15 | -2.63127 | 1 | 1 RP11-461H3.2     | K02998 |
| ENSG00000231371 | 5.13E-15 | -2.63127 | 1 | 1 AKR1B1P8         | K00011 |
| ENSG00000231373 | 5.13E-15 | -2.63127 | 1 | 1 RP11-466A17.1    | -      |
| ENSG00000231375 | 5.13E-15 | -2.63127 | 1 | 1 CDY17P           | K00653 |
| ENSG00000231376 | 5.13E-15 | -2.63127 | 1 | 1 HMGN2P16         | K11300 |
| ENSG00000231378 | 5.13E-15 | -2.63127 | 1 | 1 NDUFAF4P4        | K18161 |
| ENSG00000231379 | 5.13E-15 | -2.63127 | 1 | 1 RP11-237M21.1    | -      |
| ENSG00000231381 | 5.13E-15 | -2.63127 | 1 | 1 RNF2P1           | K10695 |
| ENSG00000231382 | 5.13E-15 | -2.63127 | 1 | 1 NBPF21P          | -      |
| ENSG00000231384 | 5.13E-15 | -2.63127 | 1 | 1 AC007919.19      | -      |
| ENSG00000231386 | 5.13E-15 | -2.63127 | 1 | 1 AC007395.4       | -      |
| ENSG00000231388 | 5.13E-15 | -2.63127 | 1 | 1 RP11-702C7.2     | K02184 |
| ENSG00000231389 | 5.13E-15 | -2.63127 | 1 | 1 HLA-DPA1         | K06752 |
| ENSG00000231390 | 5.13E-15 | -2.63127 | 1 | 1 SNX18P8          | K17923 |
| ENSG00000231391 | 5.13E-15 | -2.63127 | 1 | 1 RP11-95K23.3     | -      |
| ENSG00000231392 | 5.13E-15 | -2.63127 | 1 | 1 LL22NC03-24A12.8 | -      |
| ENSG00000231394 | 5.13E-15 | -2.63127 | 1 | 1 RP11-310H4.3     | -      |
| ENSG00000231395 | 5.13E-15 | -2.63127 | 1 | 1 AC124914.3       | K07945 |
| ENSG00000231396 | 5.13E-15 | -2.63127 | 1 | 1 USP17L10         | K11845 |
| ENSG00000231397 | 5.13E-15 | -2.63127 | 1 | 1 AC004941.5       | K14293 |
| ENSG00000231398 | 5.13E-15 | -2.63127 | 1 | 1 RP11-375N9.2     | -      |
| ENSG00000231399 | 5.13E-15 | -2.63127 | 1 | 1 SNRPEP8          | -      |
| ENSG00000231401 | 5.13E-15 | -2.63127 | 1 | 1 AC023481.1       | -      |
| ENSG00000231402 | 5.13E-15 | -2.63127 | 1 | 1 WASF5P           | K06083 |
| ENSG00000231404 | 5.13E-15 | -2.63127 | 1 | 1 RAC1P3           | K04392 |
| ENSG00000231405 | 5.13E-15 | -2.63127 | 1 | 1 CTA-992D9.7      | -      |
| ENSG00000231411 | 5.13E-15 | -2.63127 | 1 | 1 AC006987.7       | -      |
| ENSG00000231413 | 5.13E-15 | -2.63127 | 1 | 1 RP11-193P11.3    | -      |
| ENSG00000231417 | 5.13E-15 | -2.63127 | 1 | 1 IRX1P1           | -      |
| ENSG00000231418 | 5.13E-15 | -2.63127 | 1 | 1 AC006380.3       | -      |
| ENSG00000231420 | 5.13E-15 | -2.63127 | 1 | 1 AC113610.1       | -      |
| ENSG00000231421 | 5.13E-15 | -2.63127 | 1 | 1 AC006050.2       | -      |
| ENSG00000231422 | 5.13E-15 | -2.63127 | 1 | 1 RP11-80K21.3     | -      |
| ENSG00000231423 | 5.13E-15 | -2.63127 | 1 | 1 RAB9AP5          | -      |
| ENSG00000231424 | 5.13E-15 | -2.63127 | 1 | 1 RP1-45C12.1      | -      |
| ENSG00000231426 | 5.13E-15 | -2.63127 | 1 | 1 RP5-899B16.1     | -      |
| ENSG00000231427 | 5.13E-15 | -2.63127 | 1 | 1 RP11-436F9.1     | -      |
| ENSG00000231428 | 5.13E-15 | -2.63127 | 1 | 1 LINC00396        | -      |
| ENSG00000231429 | 5.13E-15 | -2.63127 | 1 | 1 RP11-343N15.2    | -      |
| ENSG00000231431 | 5.13E-15 | -2.63127 | 1 | 1 FAR2P4           | K13356 |
| ENSG00000231434 | 5.13E-15 | -2.63127 | 1 | 1 RP11-144L1.8     | K04079 |
| ENSG00000231436 | 5.13E-15 | -2.63127 | 1 | 1 RBMY3AP          | K12885 |
| ENSG00000231437 | 5.13E-15 | -2.63127 | 1 | 1 RP11-88H9.2      | -      |
| ENSG00000231439 | 5.13E-15 | -2.63127 | 1 | 1 WASIR2           | -      |
| ENSG00000231440 | 5.13E-15 | -2.63127 | 1 | 1 RP11-467I20.6    | -      |
| ENSG00000231442 | 5.13E-15 | -2.63127 | 1 | 1 LARP1BP1         | K18757 |
| ENSG00000231445 | 5.13E-15 | -2.63127 | 1 | 1 TIMM8AP1         | K17780 |
| ENSG00000231447 | 5.13E-15 | -2.63127 | 1 | 1 RP1-14D6.7       | -      |
| ENSG00000231448 | 5.13E-15 | -2.63127 | 1 | 1 RP11-763B22.9    | K09188 |
| ENSG00000231449 | 5.13E-15 | -2.63127 | 1 | 1 AC097359.2       | -      |
| ENSG00000231453 | 5.13E-15 | -2.63127 | 1 | 1 AC018470.4       | -      |
| ENSG00000231454 | 5.13E-15 | -2.63127 | 1 | 1 RP11-160N1.8     | -      |
| ENSG00000231457 | 5.13E-15 | -2.63127 | 1 | 1 RBM22P11         | K12872 |
| ENSG00000231458 | 5.13E-15 | -2.63127 | 1 | 1 RNASEH1P2        | K03469 |
| ENSG00000231461 | 5.13E-15 | -2.63127 | 1 | 1 HLA-DPA2         | K06752 |

|                 |          |          |   |                   |        |
|-----------------|----------|----------|---|-------------------|--------|
| ENSG00000231465 | 5.13E-15 | -2.63127 | 1 | 1 RP11-542K23.9   | -      |
| ENSG00000231467 | 5.13E-15 | -2.63127 | 1 | 1 RP5-1170K4.7    | -      |
| ENSG00000231468 | 5.13E-15 | -2.63127 | 1 | 1 PRDX3P2         | K03386 |
| ENSG00000231470 | 5.13E-15 | -2.63127 | 1 | 1 HMGB3P2         | K11296 |
| ENSG00000231471 | 5.13E-15 | -2.63127 | 1 | 1 HMGN2P34        | K11300 |
| ENSG00000231473 | 5.13E-15 | -2.63127 | 1 | 1 LINC00441       | -      |
| ENSG00000231475 | 5.13E-15 | -2.63127 | 1 | 1 IGHV4-31        | K06856 |
| ENSG00000231476 | 5.13E-15 | -2.63127 | 1 | 1 AC074389.5      | -      |
| ENSG00000231477 | 5.13E-15 | -2.63127 | 1 | 1 CTB-187M2.1     | -      |
| ENSG00000231478 | 5.13E-15 | -2.63127 | 1 | 1 FCF1P9          | -      |
| ENSG00000231480 | 5.13E-15 | -2.63127 | 1 | 1 SNRPGP13        | K11099 |
| ENSG00000231481 | 5.13E-15 | -2.63127 | 1 | 1 RP11-292F9.2    | -      |
| ENSG00000231482 | 5.13E-15 | -2.63127 | 1 | 1 AC141930.2      | -      |
| ENSG00000231483 | 5.13E-15 | -2.63127 | 1 | 1 RP11-336A10.5   | -      |
| ENSG00000231484 | 5.13E-15 | -2.63127 | 1 | 1 RP11-548K12.12  | -      |
| ENSG00000231485 | 5.13E-15 | -2.63127 | 1 | 1 RP4-535B20.1    | -      |
| ENSG00000231486 | 5.13E-15 | -2.63127 | 1 | 1 AC096579.7      | -      |
| ENSG00000231487 | 5.13E-15 | -2.63127 | 1 | 1 AP006285.7      | -      |
| ENSG00000231489 | 5.13E-15 | -2.63127 | 1 | 1 AF196972.10     | K00819 |
| ENSG00000231490 | 5.13E-15 | -2.63127 | 1 | 1 RPL7L1P2        | -      |
| ENSG00000231491 | 5.13E-15 | -2.63127 | 1 | 1 RP11-71E22.1    | -      |
| ENSG00000231492 | 5.13E-15 | -2.63127 | 1 | 1 AP003774.5      | -      |
| ENSG00000231494 | 5.13E-15 | -2.63127 | 1 | 1 AC104634.3      | K02889 |
| ENSG00000231495 | 5.13E-15 | -2.63127 | 1 | 1 RP1-213J1P__B.2 | -      |
| ENSG00000231496 | 5.13E-15 | -2.63127 | 1 | 1 RP1-251M9.2     | -      |
| ENSG00000231501 | 5.13E-15 | -2.63127 | 1 | 1 MTND4LP1        | K03882 |
| ENSG00000231504 | 5.13E-15 | -2.63127 | 1 | 1 NMD3P2          | K07562 |
| ENSG00000231505 | 5.13E-15 | -2.63127 | 1 | 1 AC108868.5      | -      |
| ENSG00000231507 | 5.13E-15 | -2.63127 | 1 | 1 RP11-134P9.3    | -      |
| ENSG00000231508 | 5.13E-15 | -2.63127 | 1 | 1 RP11-452K12.6   | K02915 |
| ENSG00000231509 | 5.13E-15 | -2.63127 | 1 | 1 RP11-574F11.3   | -      |
| ENSG00000231510 | 5.13E-15 | -2.63127 | 1 | 1 RP11-542C10.1   | -      |
| ENSG00000231511 | 5.13E-15 | -2.63127 | 1 | 1 RP11-45O22.3    | -      |
| ENSG00000231512 | 5.13E-15 | -2.63127 | 1 | 1 RP11-261C10.2   | -      |
| ENSG00000231513 | 5.13E-15 | -2.63127 | 1 | 1 RP11-274K13.5   | -      |
| ENSG00000231514 | 5.13E-15 | -2.63127 | 1 | 1 FAM58CP         | -      |
| ENSG00000231515 | 5.13E-15 | -2.63127 | 1 | 1 AC006003.3      | -      |
| ENSG00000231516 | 5.13E-15 | -2.63127 | 1 | 1 CBX1P5          | K11585 |
| ENSG00000231517 | 5.13E-15 | -2.63127 | 1 | 1 RP11-7G23.5     | -      |
| ENSG00000231521 | 5.13E-15 | -2.63127 | 1 | 1 RP11-244N9.4    | -      |
| ENSG00000231523 | 5.13E-15 | -2.63127 | 1 | 1 RP11-196D18.5   | K16941 |
| ENSG00000231525 | 5.13E-15 | -2.63127 | 1 | 1 AC002486.2      | K07834 |
| ENSG00000231529 | 5.13E-15 | -2.63127 | 1 | 1 RP11-410C4.4    | -      |
| ENSG00000231531 | 5.13E-15 | -2.63127 | 1 | 1 HINT1P1         | K02503 |
| ENSG00000231532 | 5.13E-15 | -2.63127 | 1 | 1 AC022311.1      | -      |
| ENSG00000231533 | 5.13E-15 | -2.63127 | 1 | 1 RP1-232L24.3    | -      |
| ENSG00000231534 | 5.13E-15 | -2.63127 | 1 | 1 FBXO36-IT1      | -      |
| ENSG00000231535 | 5.13E-15 | -2.63127 | 1 | 1 LINC00278       | -      |
| ENSG00000231537 | 5.13E-15 | -2.63127 | 1 | 1 RP11-1217F2.3   | K02262 |
| ENSG00000231538 | 5.13E-15 | -2.63127 | 1 | 1 DPP10-AS3       | -      |
| ENSG00000231539 | 5.13E-15 | -2.63127 | 1 | 1 AC010132.10     | -      |
| ENSG00000231540 | 5.13E-15 | -2.63127 | 1 | 1 TCEB1P9         | -      |
| ENSG00000231541 | 5.13E-15 | -2.63127 | 1 | 1 RPS6P2          | K02991 |
| ENSG00000231542 | 5.13E-15 | -2.63127 | 1 | 1 TAB3-AS1        | -      |
| ENSG00000231546 | 5.13E-15 | -2.63127 | 1 | 1 RPL3P5          | K02925 |
| ENSG00000231547 | 5.13E-15 | -2.63127 | 1 | 1 RP11-38O14.6    | -      |
| ENSG00000231548 | 5.13E-15 | -2.63127 | 1 | 1 OR55B1P         | K04257 |
| ENSG00000231549 | 5.13E-15 | -2.63127 | 1 | 1 USMG5P1         | K18194 |

|                 |          |          |   |                   |        |
|-----------------|----------|----------|---|-------------------|--------|
| ENSG00000231550 | 5.13E-15 | -2.63127 | 1 | 1 PTCHD3P2        | -      |
| ENSG00000231551 | 5.13E-15 | -2.63127 | 1 | 1 RP11-495P10.1   | -      |
| ENSG00000231552 | 5.13E-15 | -2.63127 | 1 | 1 IGBP1P3         | K17606 |
| ENSG00000231553 | 5.13E-15 | -2.63127 | 1 | 1 RNMTL1P1        | -      |
| ENSG00000231556 | 5.13E-15 | -2.63127 | 1 | 1 RSL24D1P3       | K02896 |
| ENSG00000231557 | 5.13E-15 | -2.63127 | 1 | 1 AC018717.1      | -      |
| ENSG00000231559 | 5.13E-15 | -2.63127 | 1 | 1 RP3-354J5.3     | -      |
| ENSG00000231560 | 5.13E-15 | -2.63127 | 1 | 1 AC091814.3      | -      |
| ENSG00000231561 | 5.13E-15 | -2.63127 | 1 | 1 CEACAMP5        | K06499 |
| ENSG00000231562 | 5.13E-15 | -2.63127 | 1 | 1 RP11-508N12.3   | K02936 |
| ENSG00000231565 | 5.13E-15 | -2.63127 | 1 | 1 NEK2P2          | K08857 |
| ENSG00000231566 | 5.13E-15 | -2.63127 | 1 | 1 RP5-1158E12.3   | -      |
| ENSG00000231567 | 5.13E-15 | -2.63127 | 1 | 1 MTND2P19        | K03879 |
| ENSG00000231568 | 5.13E-15 | -2.63127 | 1 | 1 RP11-552E4.4    | -      |
| ENSG00000231569 | 5.13E-15 | -2.63127 | 1 | 1 RP11-399L7.3    | -      |
| ENSG00000231570 | 5.13E-15 | -2.63127 | 1 | 1 AC008173.1      | K03767 |
| ENSG00000231575 | 5.13E-15 | -2.63127 | 1 | 1 RP11-162K11.4   | -      |
| ENSG00000231576 | 5.13E-15 | -2.63127 | 1 | 1 Z95114.3        | -      |
| ENSG00000231582 | 5.13E-15 | -2.63127 | 1 | 1 RP11-293G6__B.4 | -      |
| ENSG00000231583 | 5.13E-15 | -2.63127 | 1 | 1 AC108938.3      | K06047 |
| ENSG00000231585 | 5.13E-15 | -2.63127 | 1 | 1 AC034228.2      | -      |
| ENSG00000231586 | 5.13E-15 | -2.63127 | 1 | 1 RPS23P9         | K02973 |
| ENSG00000231588 | 5.13E-15 | -2.63127 | 1 | 1 RP11-50E11.2    | K14764 |
| ENSG00000231589 | 5.13E-15 | -2.63127 | 1 | 1 AC009110.1      | -      |
| ENSG00000231590 | 5.13E-15 | -2.63127 | 1 | 1 RP11-353J17.3   | -      |
| ENSG00000231593 | 5.13E-15 | -2.63127 | 1 | 1 RP13-34L8.8     | -      |
| ENSG00000231597 | 5.13E-15 | -2.63127 | 1 | 1 AC007557.4      | -      |
| ENSG00000231599 | 5.13E-15 | -2.63127 | 1 | 1 LINC01037       | -      |
| ENSG00000231600 | 5.13E-15 | -2.63127 | 1 | 1 AC151960.1      | K10501 |
| ENSG00000231601 | 5.13E-15 | -2.63127 | 1 | 1 RP11-164C1.2    | -      |
| ENSG00000231603 | 5.13E-15 | -2.63127 | 1 | 1 RP11-344N17.12  | K00819 |
| ENSG00000231604 | 5.13E-15 | -2.63127 | 1 | 1 RP5-897D18.1    | -      |
| ENSG00000231605 | 5.13E-15 | -2.63127 | 1 | 1 RP11-277B15.2   | -      |
| ENSG00000231606 | 5.13E-15 | -2.63127 | 1 | 1 RP11-344F13.1   | -      |
| ENSG00000231610 | 5.13E-15 | -2.63127 | 1 | 1 AC021021.1      | K00922 |
| ENSG00000231612 | 5.13E-15 | -2.63127 | 1 | 1 RP11-522M21.3   | -      |
| ENSG00000231613 | 5.13E-15 | -2.63127 | 1 | 1 RP5-943J3.1     | -      |
| ENSG00000231615 | 5.13E-15 | -2.63127 | 1 | 1 RP11-296O14.2   | K16762 |
| ENSG00000231619 | 5.13E-15 | -2.63127 | 1 | 1 GS1-542M4.3     | -      |
| ENSG00000231620 | 5.13E-15 | -2.63127 | 1 | 1 AP000855.4      | -      |
| ENSG00000231621 | 5.13E-15 | -2.63127 | 1 | 1 AC013264.2      | -      |
| ENSG00000231622 | 5.13E-15 | -2.63127 | 1 | 1 RP4-700A9.1     | K02980 |
| ENSG00000231625 | 5.13E-15 | -2.63127 | 1 | 1 CTD-2104P17.1   | K03327 |
| ENSG00000231626 | 5.13E-15 | -2.63127 | 1 | 1 AC013402.4      | -      |
| ENSG00000231630 | 5.13E-15 | -2.63127 | 1 | 1 RP11-740P5.3    | -      |
| ENSG00000231632 | 5.13E-15 | -2.63127 | 1 | 1 RP11-82L18.4    | -      |
| ENSG00000231633 | 5.13E-15 | -2.63127 | 1 | 1 LINC00283       | -      |
| ENSG00000231635 | 5.13E-15 | -2.63127 | 1 | 1 ATP5BP1         | K02133 |
| ENSG00000231636 | 5.13E-15 | -2.63127 | 1 | 1 AGBL5-AS1       | -      |
| ENSG00000231637 | 5.13E-15 | -2.63127 | 1 | 1 USP17L29        | K11845 |
| ENSG00000231643 | 5.13E-15 | -2.63127 | 1 | 1 GHc-210E9.2     | K16197 |
| ENSG00000231646 | 5.13E-15 | -2.63127 | 1 | 1 AC008174.3      | -      |
| ENSG00000231648 | 5.13E-15 | -2.63127 | 1 | 1 RP11-372M18.2   | -      |
| ENSG00000231649 | 5.13E-15 | -2.63127 | 1 | 1 SPATA31B1       | -      |
| ENSG00000231650 | 5.13E-15 | -2.63127 | 1 | 1 RFESDP1         | -      |
| ENSG00000231653 | 5.13E-15 | -2.63127 | 1 | 1 AC010731.3      | -      |
| ENSG00000231654 | 5.13E-15 | -2.63127 | 1 | 1 RPS6KA2-AS1     | -      |
| ENSG00000231655 | 5.13E-15 | -2.63127 | 1 | 1 AC011742.3      | K08341 |

|                 |          |          |   |                    |        |
|-----------------|----------|----------|---|--------------------|--------|
| ENSG00000231656 | 5.13E-15 | -2.63127 | 1 | 1 FAM90A18P        | -      |
| ENSG00000231660 | 5.13E-15 | -2.63127 | 1 | 1 RPS8P6           | K02995 |
| ENSG00000231662 | 5.13E-15 | -2.63127 | 1 | 1 RP11-686D16.1    | -      |
| ENSG00000231666 | 5.13E-15 | -2.63127 | 1 | 1 RP11-404O13.1    | -      |
| ENSG00000231667 | 5.13E-15 | -2.63127 | 1 | 1 OR7E111P         | K04257 |
| ENSG00000231668 | 5.13E-15 | -2.63127 | 1 | 1 PPP2R2DP1        | K04354 |
| ENSG00000231671 | 5.13E-15 | -2.63127 | 1 | 1 RP11-157N3.1     | -      |
| ENSG00000231674 | 5.13E-15 | -2.63127 | 1 | 1 LINC00410        | -      |
| ENSG00000231675 | 5.13E-15 | -2.63127 | 1 | 1 AC005042.3       | K14971 |
| ENSG00000231678 | 5.13E-15 | -2.63127 | 1 | 1 RP11-339N8.1     | -      |
| ENSG00000231680 | 5.13E-15 | -2.63127 | 1 | 1 AP003774.6       | -      |
| ENSG00000231681 | 5.13E-15 | -2.63127 | 1 | 1 AC020743.3       | -      |
| ENSG00000231682 | 5.13E-15 | -2.63127 | 1 | 1 AC097713.4       | -      |
| ENSG00000231683 | 5.13E-15 | -2.63127 | 1 | 1 RP1-27K12.2      | -      |
| ENSG00000231684 | 5.13E-15 | -2.63127 | 1 | 1 RP11-416K24.2    | K03113 |
| ENSG00000231688 | 5.13E-15 | -2.63127 | 1 | 1 RPL21P43         | K02889 |
| ENSG00000231689 | 5.13E-15 | -2.63127 | 1 | 1 LINC01090        | -      |
| ENSG00000231690 | 5.13E-15 | -2.63127 | 1 | 1 LINC00574        | -      |
| ENSG00000231691 | 5.13E-15 | -2.63127 | 1 | 1 RP11-203F10.5    | -      |
| ENSG00000231694 | 5.13E-15 | -2.63127 | 1 | 1 RP5-1014O16.10   | -      |
| ENSG00000231698 | 5.13E-15 | -2.63127 | 1 | 1 AP002856.5       | -      |
| ENSG00000231699 | 5.13E-15 | -2.63127 | 1 | 1 AC020550.7       | K02924 |
| ENSG00000231700 | 5.13E-15 | -2.63127 | 1 | 1 RP11-367J7.4     | K13172 |
| ENSG00000231701 | 5.13E-15 | -2.63127 | 1 | 1 BMS1P13          | K14569 |
| ENSG00000231706 | 5.13E-15 | -2.63127 | 1 | 1 CYCSP43          | K08738 |
| ENSG00000231707 | 5.13E-15 | -2.63127 | 1 | 1 PABPC1P1         | K13126 |
| ENSG00000231712 | 5.13E-15 | -2.63127 | 1 | 1 AC104698.2       | K11253 |
| ENSG00000231713 | 5.13E-15 | -2.63127 | 1 | 1 AF064860.7       | -      |
| ENSG00000231714 | 5.13E-15 | -2.63127 | 1 | 1 RP11-476H20.1    | -      |
| ENSG00000231715 | 5.13E-15 | -2.63127 | 1 | 1 COX6CP2          | K02268 |
| ENSG00000231716 | 5.13E-15 | -2.63127 | 1 | 1 CDY23P           | -      |
| ENSG00000231718 | 5.13E-15 | -2.63127 | 1 | 1 RP11-382E9.1     | -      |
| ENSG00000231720 | 5.13E-15 | -2.63127 | 1 | 1 RP11-568A7.3     | -      |
| ENSG00000231722 | 5.13E-15 | -2.63127 | 1 | 1 AC012075.1       | K12194 |
| ENSG00000231723 | 5.13E-15 | -2.63127 | 1 | 1 AC018880.2       | K10365 |
| ENSG00000231725 | 5.13E-15 | -2.63127 | 1 | 1 VN1R110P         | K04614 |
| ENSG00000231728 | 5.13E-15 | -2.63127 | 1 | 1 LLOXNC01-116E7.2 | -      |
| ENSG00000231729 | 5.13E-15 | -2.63127 | 1 | 1 ARHGEF9-IT1      | -      |
| ENSG00000231734 | 5.13E-15 | -2.63127 | 1 | 1 RP6-206I17.2     | -      |
| ENSG00000231735 | 5.13E-15 | -2.63127 | 1 | 1 RP11-1O7.1       | K02981 |
| ENSG00000231738 | 5.13E-15 | -2.63127 | 1 | 1 TSPAN19          | K17358 |
| ENSG00000231739 | 5.13E-15 | -2.63127 | 1 | 1 GAPDHP59         | K00134 |
| ENSG00000231740 | 5.13E-15 | -2.63127 | 1 | 1 RP11-63G10.2     | -      |
| ENSG00000231741 | 5.13E-15 | -2.63127 | 1 | 1 RP11-213G2.5     | K14775 |
| ENSG00000231743 | 5.13E-15 | -2.63127 | 1 | 1 RP11-89K18.1     | -      |
| ENSG00000231744 | 5.13E-15 | -2.63127 | 1 | 1 RP11-164H5.1     | K15306 |
| ENSG00000231748 | 5.13E-15 | -2.63127 | 1 | 1 RP11-227H15.5    | -      |
| ENSG00000231749 | 5.13E-15 | -2.63127 | 1 | 1 ABCA9-AS1        | -      |
| ENSG00000231750 | 5.13E-15 | -2.63127 | 1 | 1 NANOGP10         | K10164 |
| ENSG00000231752 | 5.13E-15 | -2.63127 | 1 | 1 EMBP1            | -      |
| ENSG00000231754 | 5.13E-15 | -2.63127 | 1 | 1 RP11-204E9.1     | -      |
| ENSG00000231755 | 5.13E-15 | -2.63127 | 1 | 1 CHODL-AS1        | -      |
| ENSG00000231756 | 5.13E-15 | -2.63127 | 1 | 1 RP11-183I6.2     | -      |
| ENSG00000231757 | 5.13E-15 | -2.63127 | 1 | 1 FAM74A2          | -      |
| ENSG00000231758 | 5.13E-15 | -2.63127 | 1 | 1 AC092652.1       | -      |
| ENSG00000231762 | 5.13E-15 | -2.63127 | 1 | 1 RP11-354K4.1     | K04613 |
| ENSG00000231763 | 5.13E-15 | -2.63127 | 1 | 1 PQLC1P1          | -      |
| ENSG00000231764 | 5.13E-15 | -2.63127 | 1 | 1 DLX6-AS1         | -      |



|                 |          |          |   |                  |        |
|-----------------|----------|----------|---|------------------|--------|
| ENSG00000231765 | 5.13E-15 | -2.63127 | 1 | 1 PPP1R11P2      | --     |
| ENSG00000231766 | 5.13E-15 | -2.63127 | 1 | 1 AC013437.7     | --     |
| ENSG00000231769 | 5.13E-15 | -2.63127 | 1 | 1 RP1-8B1.4      | --     |
| ENSG00000231772 | 5.13E-15 | -2.63127 | 1 | 1 RP1-154K9.2    | --     |
| ENSG00000231774 | 5.13E-15 | -2.63127 | 1 | 1 RP11-402P6.11  | --     |
| ENSG00000231775 | 5.13E-15 | -2.63127 | 1 | 1 RP11-472D17.4  | --     |
| ENSG00000231776 | 5.13E-15 | -2.63127 | 1 | 1 RP1-90L14.1    | --     |
| ENSG00000231777 | 5.13E-15 | -2.63127 | 1 | 1 MTND4P21       | --     |
| ENSG00000231780 | 5.13E-15 | -2.63127 | 1 | 1 AC090960.1     | --     |
| ENSG00000231781 | 5.13E-15 | -2.63127 | 1 | 1 AC079896.1     | --     |
| ENSG00000231782 | 5.13E-15 | -2.63127 | 1 | 1 LINC00575      | --     |
| ENSG00000231787 | 5.13E-15 | -2.63127 | 1 | 1 RP11-370B6.1   | --     |
| ENSG00000231788 | 5.13E-15 | -2.63127 | 1 | 1 RPL31P50       | K02910 |
| ENSG00000231791 | 5.13E-15 | -2.63127 | 1 | 1 RP11-382D12.1  | --     |
| ENSG00000231794 | 5.13E-15 | -2.63127 | 1 | 1 AC009542.2     | --     |
| ENSG00000231795 | 5.13E-15 | -2.63127 | 1 | 1 ITCH-IT1       | --     |
| ENSG00000231799 | 5.13E-15 | -2.63127 | 1 | 1 RP13-93L13.2   | --     |
| ENSG00000231801 | 5.13E-15 | -2.63127 | 1 | 1 ANP32BP2       | K18647 |
| ENSG00000231802 | 5.13E-15 | -2.63127 | 1 | 1 AC009502.1     | K09512 |
| ENSG00000231808 | 5.13E-15 | -2.63127 | 1 | 1 RP11-143M1.4   | --     |
| ENSG00000231809 | 5.13E-15 | -2.63127 | 1 | 1 NANOGP9        | K10164 |
| ENSG00000231810 | 5.13E-15 | -2.63127 | 1 | 1 RPL36AP35      | --     |
| ENSG00000231812 | 5.13E-15 | -2.63127 | 1 | 1 AC005326.2     | K11095 |
| ENSG00000231814 | 5.13E-15 | -2.63127 | 1 | 1 LINC00210      | --     |
| ENSG00000231815 | 5.13E-15 | -2.63127 | 1 | 1 AC007179.1     | --     |
| ENSG00000231817 | 5.13E-15 | -2.63127 | 1 | 1 RP11-189B4.6   | --     |
| ENSG00000231821 | 5.13E-15 | -2.63127 | 1 | 1 NPM1P48        | K11276 |
| ENSG00000231824 | 5.13E-15 | -2.63127 | 1 | 1 C18orf42       | --     |
| ENSG00000231827 | 5.13E-15 | -2.63127 | 1 | 1 RP11-216N14.5  | --     |
| ENSG00000231829 | 5.13E-15 | -2.63127 | 1 | 1 RP11-310E22.5  | --     |
| ENSG00000231830 | 5.13E-15 | -2.63127 | 1 | 1 XX-FW83128A1.2 | --     |
| ENSG00000231837 | 5.13E-15 | -2.63127 | 1 | 1 RPS7P2         | --     |
| ENSG00000231838 | 5.13E-15 | -2.63127 | 1 | 1 RP11-449H15.2  | --     |
| ENSG00000231839 | 5.13E-15 | -2.63127 | 1 | 1 AC073055.2     | --     |
| ENSG00000231840 | 5.13E-15 | -2.63127 | 1 | 1 AC073342.12    | --     |
| ENSG00000231846 | 5.13E-15 | -2.63127 | 1 | 1 RP11-494I9.2   | --     |
| ENSG00000231848 | 5.13E-15 | -2.63127 | 1 | 1 AC012354.8     | --     |
| ENSG00000231849 | 5.13E-15 | -2.63127 | 1 | 1 UBE2V2P4       | K10704 |
| ENSG00000231850 | 5.13E-15 | -2.63127 | 1 | 1 GAGE2B         | --     |
| ENSG00000231852 | 5.13E-15 | -2.63127 | 1 | 1 CYP21A2        | K00513 |
| ENSG00000231855 | 5.13E-15 | -2.63127 | 1 | 1 GLUDP5         | K00261 |
| ENSG00000231857 | 5.13E-15 | -2.63127 | 1 | 1 MORF4L1P5      | K11339 |
| ENSG00000231858 | 5.13E-15 | -2.63127 | 1 | 1 AC067945.4     | --     |
| ENSG00000231859 | 5.13E-15 | -2.63127 | 1 | 1 AC007875.2     | --     |
| ENSG00000231861 | 5.13E-15 | -2.63127 | 1 | 1 OR5K2          | K04257 |
| ENSG00000231863 | 5.13E-15 | -2.63127 | 1 | 1 RP3-428L16.1   | --     |
| ENSG00000231864 | 5.13E-15 | -2.63127 | 1 | 1 RP11-229P13.23 | --     |
| ENSG00000231866 | 5.13E-15 | -2.63127 | 1 | 1 RP4-631H13.4   | K18193 |
| ENSG00000231867 | 5.13E-15 | -2.63127 | 1 | 1 AP001625.5     | --     |
| ENSG00000231870 | 5.13E-15 | -2.63127 | 1 | 1 KRT17P3        | K07604 |
| ENSG00000231873 | 5.13E-15 | -2.63127 | 1 | 1 RP11-761N21.1  | --     |
| ENSG00000231874 | 5.13E-15 | -2.63127 | 1 | 1 TSPY18P        | K11284 |
| ENSG00000231875 | 5.13E-15 | -2.63127 | 1 | 1 RP11-346E8.1   | --     |
| ENSG00000231876 | 5.13E-15 | -2.63127 | 1 | 1 AC009158.1     | --     |
| ENSG00000231877 | 5.13E-15 | -2.63127 | 1 | 1 RP11-177F15.1  | --     |
| ENSG00000231879 | 5.13E-15 | -2.63127 | 1 | 1 TXNL1P1        | --     |
| ENSG00000231880 | 5.13E-15 | -2.63127 | 1 | 1 KBTBD4         | K10472 |
| ENSG00000231882 | 5.13E-15 | -2.63127 | 1 | 1 F10-AS1        | --     |

|                 |          |          |   |                 |        |
|-----------------|----------|----------|---|-----------------|--------|
| ENSG00000231883 | 5.13E-15 | -2.63127 | 1 | 1 RP1-297M16.2  | —      |
| ENSG00000231884 | 5.13E-15 | -2.63127 | 1 | 1 NDUFB1P1      | K03957 |
| ENSG00000231887 | 5.13E-15 | -2.63127 | 1 | 1 PRH1          | K13910 |
| ENSG00000231892 | 5.13E-15 | -2.63127 | 1 | 1 AC073316.2    | —      |
| ENSG00000231894 | 5.13E-15 | -2.63127 | 1 | 1 WDR95P        | —      |
| ENSG00000231896 | 5.13E-15 | -2.63127 | 1 | 1 AC019185.4    | —      |
| ENSG00000231897 | 5.13E-15 | -2.63127 | 1 | 1 MARK2P14      | —      |
| ENSG00000231898 | 5.13E-15 | -2.63127 | 1 | 1 AC012594.1    | —      |
| ENSG00000231900 | 5.13E-15 | -2.63127 | 1 | 1 GOT2P1        | K14455 |
| ENSG00000231901 | 5.13E-15 | -2.63127 | 1 | 1 RP11-281A20.1 | —      |
| ENSG00000231902 | 5.13E-15 | -2.63127 | 1 | 1 RP11-29B9.2   | —      |
| ENSG00000231903 | 5.13E-15 | -2.63127 | 1 | 1 AC079354.5    | —      |
| ENSG00000231906 | 5.13E-15 | -2.63127 | 1 | 1 RP11-541M12.3 | —      |
| ENSG00000231907 | 5.13E-15 | -2.63127 | 1 | 1 GAPDHP37      | K00134 |
| ENSG00000231909 | 5.13E-15 | -2.63127 | 1 | 1 RP11-363E7.3  | K10435 |
| ENSG00000231910 | 5.13E-15 | -2.63127 | 1 | 1 GAMTP2        | K00542 |
| ENSG00000231911 | 5.13E-15 | -2.63127 | 1 | 1 TPRKBP1       | K15901 |
| ENSG00000231912 | 5.13E-15 | -2.63127 | 1 | 1 RP1-249H1.2   | —      |
| ENSG00000231913 | 5.13E-15 | -2.63127 | 1 | 1 RARRES2P3     | K10044 |
| ENSG00000231914 | 5.13E-15 | -2.63127 | 1 | 1 LINC00387     | —      |
| ENSG00000231915 | 5.13E-15 | -2.63127 | 1 | 1 SALL4P5       | —      |
| ENSG00000231916 | 5.13E-15 | -2.63127 | 1 | 1 AC006033.22   | —      |
| ENSG00000231918 | 5.13E-15 | -2.63127 | 1 | 1 AC007682.1    | —      |
| ENSG00000231922 | 5.13E-15 | -2.63127 | 1 | 1 AL138479.3    | —      |
| ENSG00000231923 | 5.13E-15 | -2.63127 | 1 | 1 AC024082.3    | K13989 |
| ENSG00000231926 | 5.13E-15 | -2.63127 | 1 | 1 SEPHS1P7      | K01008 |
| ENSG00000231930 | 5.13E-15 | -2.63127 | 1 | 1 AF228730.5    | K02974 |
| ENSG00000231931 | 5.13E-15 | -2.63127 | 1 | 1 AC024082.4    | —      |
| ENSG00000231933 | 5.13E-15 | -2.63127 | 1 | 1 CTA-125H2.2   | —      |
| ENSG00000231934 | 5.13E-15 | -2.63127 | 1 | 1 RP4-610C12.1  | —      |
| ENSG00000231937 | 5.13E-15 | -2.63127 | 1 | 1 RP11-329E24.6 | —      |
| ENSG00000231942 | 5.13E-15 | -2.63127 | 1 | 1 HNRNPA1P36    | K12741 |
| ENSG00000231943 | 5.13E-15 | -2.63127 | 1 | 1 RP11-395L14.4 | —      |
| ENSG00000231944 | 5.13E-15 | -2.63127 | 1 | 1 PHKA1-AS1     | —      |
| ENSG00000231947 | 5.13E-15 | -2.63127 | 1 | 1 MTND2P24      | —      |
| ENSG00000231948 | 5.13E-15 | -2.63127 | 1 | 1 HS1BP3-IT1    | —      |
| ENSG00000231949 | 5.13E-15 | -2.63127 | 1 | 1 RP4-591L5.2   | —      |
| ENSG00000231951 | 5.13E-15 | -2.63127 | 1 | 1 AC004837.4    | —      |
| ENSG00000231953 | 5.13E-15 | -2.63127 | 1 | 1 RP4-706G24.1  | —      |
| ENSG00000231954 | 5.13E-15 | -2.63127 | 1 | 1 MTND2P22      | K03879 |
| ENSG00000231955 | 5.13E-15 | -2.63127 | 1 | 1 AC007383.4    | —      |
| ENSG00000231956 | 5.13E-15 | -2.63127 | 1 | 1 HNRNPA1P9     | K12741 |
| ENSG00000231957 | 5.13E-15 | -2.63127 | 1 | 1 GNAI2P2       | —      |
| ENSG00000231961 | 5.13E-15 | -2.63127 | 1 | 1 RP5-967N21.7  | K02256 |
| ENSG00000231962 | 5.13E-15 | -2.63127 | 1 | 1 VN1R7P        | K04614 |
| ENSG00000231963 | 5.13E-15 | -2.63127 | 1 | 1 RP11-493K23.4 | —      |
| ENSG00000231964 | 5.13E-15 | -2.63127 | 1 | 1 RP11-67C2.2   | —      |
| ENSG00000231965 | 5.13E-15 | -2.63127 | 1 | 1 AF131215.1    | K02880 |
| ENSG00000231967 | 5.13E-15 | -2.63127 | 1 | 1 RP11-12D24.6  | —      |
| ENSG00000231969 | 5.13E-15 | -2.63127 | 1 | 1 AC144449.1    | —      |
| ENSG00000231970 | 5.13E-15 | -2.63127 | 1 | 1 RP11-452K12.7 | —      |
| ENSG00000231976 | 5.13E-15 | -2.63127 | 1 | 1 LINC00202-2   | —      |
| ENSG00000231977 | 5.13E-15 | -2.63127 | 1 | 1 RP5-963E22.4  | —      |
| ENSG00000231978 | 5.13E-15 | -2.63127 | 1 | 1 RP11-132G19.3 | —      |
| ENSG00000231979 | 5.13E-15 | -2.63127 | 1 | 1 RP11-35L17.3  | —      |
| ENSG00000231980 | 5.13E-15 | -2.63127 | 1 | 1 AC011899.10   | —      |
| ENSG00000231981 | 5.13E-15 | -2.63127 | 1 | 1 RPL7L1P12     | —      |
| ENSG00000231983 | 5.13E-15 | -2.63127 | 1 | 1 LINC00415     | —      |

|                 |          |          |   |                    |        |
|-----------------|----------|----------|---|--------------------|--------|
| ENSG00000231984 | 5.13E-15 | -2.63127 | 1 | 1 RP11-2L13.1      | -      |
| ENSG00000231985 | 5.13E-15 | -2.63127 | 1 | 1 RP11-82L20.1     | -      |
| ENSG00000231986 | 5.13E-15 | -2.63127 | 1 | 1 AP000474.1       | -      |
| ENSG00000231987 | 5.13E-15 | -2.63127 | 1 | 1 RP5-898J17.1     | -      |
| ENSG00000231988 | 5.13E-15 | -2.63127 | 1 | 1 OFD1P3Y          | K16480 |
| ENSG00000231990 | 5.13E-15 | -2.63127 | 1 | 1 RP11-53B5.1      | -      |
| ENSG00000231995 | 5.13E-15 | -2.63127 | 1 | 1 RP11-111F5.2     | K02936 |
| ENSG00000231996 | 5.13E-15 | -2.63127 | 1 | 1 RP4-581O6.1      | K02924 |
| ENSG00000231997 | 5.13E-15 | -2.63127 | 1 | 1 FAM27D1          | -      |
| ENSG00000231999 | 5.13E-15 | -2.63127 | 1 | 1 RP5-1007M22.2    | -      |
| ENSG00000232000 | 5.13E-15 | -2.63127 | 1 | 1 RP11-54D18.3     | K05012 |
| ENSG00000232001 | 5.13E-15 | -2.63127 | 1 | 1 AC108868.6       | -      |
| ENSG00000232003 | 5.13E-15 | -2.63127 | 1 | 1 ZNF736P12Y       | K09228 |
| ENSG00000232006 | 5.13E-15 | -2.63127 | 1 | 1 AC005537.2       | -      |
| ENSG00000232009 | 5.13E-15 | -2.63127 | 1 | 1 RP11-571E6.4     | -      |
| ENSG00000232014 | 5.13E-15 | -2.63127 | 1 | 1 MTND1P13         | -      |
| ENSG00000232015 | 5.13E-15 | -2.63127 | 1 | 1 HSPE1P25         | K04078 |
| ENSG00000232018 | 5.13E-15 | -2.63127 | 1 | 1 AL132709.8       | -      |
| ENSG00000232021 | 5.13E-15 | -2.63127 | 1 | 1 LEF1-AS1         | -      |
| ENSG00000232023 | 5.13E-15 | -2.63127 | 1 | 1 AC009410.1       | -      |
| ENSG00000232025 | 5.13E-15 | -2.63127 | 1 | 1 RP1-218B13.1     | -      |
| ENSG00000232029 | 5.13E-15 | -2.63127 | 1 | 1 TCEB1P15         | -      |
| ENSG00000232030 | 5.13E-15 | -2.63127 | 1 | 1 MAGEB6P1         | -      |
| ENSG00000232032 | 5.13E-15 | -2.63127 | 1 | 1 AC079781.7       | -      |
| ENSG00000232035 | 5.13E-15 | -2.63127 | 1 | 1 RP11-87N24.3     | -      |
| ENSG00000232036 | 5.13E-15 | -2.63127 | 1 | 1 GS1-115G20.2     | K15331 |
| ENSG00000232037 | 5.13E-15 | -2.63127 | 1 | 1 RP11-26H16.1     | K02889 |
| ENSG00000232039 | 5.13E-15 | -2.63127 | 1 | 1 DEFT1P2          | K05230 |
| ENSG00000232040 | 5.13E-15 | -2.63127 | 1 | 1 SCAND3           | K09230 |
| ENSG00000232041 | 5.13E-15 | -2.63127 | 1 | 1 PSMD10P3         | K06694 |
| ENSG00000232042 | 5.13E-15 | -2.63127 | 1 | 1 RP11-45J1.1      | K09550 |
| ENSG00000232044 | 5.13E-15 | -2.63127 | 1 | 1 LINC01105        | -      |
| ENSG00000232048 | 5.13E-15 | -2.63127 | 1 | 1 HNRNPCP9         | K12884 |
| ENSG00000232050 | 5.13E-15 | -2.63127 | 1 | 1 CTA-125H2.3      | K10584 |
| ENSG00000232053 | 5.13E-15 | -2.63127 | 1 | 1 AC009784.3       | -      |
| ENSG00000232054 | 5.13E-15 | -2.63127 | 1 | 1 NPM1P34          | K11276 |
| ENSG00000232056 | 5.13E-15 | -2.63127 | 1 | 1 AC092687.4       | -      |
| ENSG00000232058 | 5.13E-15 | -2.63127 | 1 | 1 AC005772.2       | -      |
| ENSG00000232064 | 5.13E-15 | -2.63127 | 1 | 1 USP9YP33         | -      |
| ENSG00000232068 | 5.13E-15 | -2.63127 | 1 | 1 AF003529.2       | -      |
| ENSG00000232069 | 5.13E-15 | -2.63127 | 1 | 1 RPS29P28         | K02980 |
| ENSG00000232072 | 5.13E-15 | -2.63127 | 1 | 1 AC004901.1       | -      |
| ENSG00000232073 | 5.13E-15 | -2.63127 | 1 | 1 RP1-302D9.3      | -      |
| ENSG00000232077 | 5.13E-15 | -2.63127 | 1 | 1 LINC01031        | -      |
| ENSG00000232079 | 5.13E-15 | -2.63127 | 1 | 1 AL035610.1       | -      |
| ENSG00000232080 | 5.13E-15 | -2.63127 | 1 | 1 XXbac-BPG254F23. | -      |
| ENSG00000232081 | 5.13E-15 | -2.63127 | 1 | 1 LARGE-IT1        | -      |
| ENSG00000232082 | 5.13E-15 | -2.63127 | 1 | 1 RPS6KA2-IT1      | -      |
| ENSG00000232083 | 5.13E-15 | -2.63127 | 1 | 1 RPL31P7          | K02910 |
| ENSG00000232084 | 5.13E-15 | -2.63127 | 1 | 1 LINC01104        | -      |
| ENSG00000232085 | 5.13E-15 | -2.63127 | 1 | 1 RP11-261C10.4    | -      |
| ENSG00000232086 | 5.13E-15 | -2.63127 | 1 | 1 RP11-141J10.1    | -      |
| ENSG00000232087 | 5.13E-15 | -2.63127 | 1 | 1 HCFC2P1          | -      |
| ENSG00000232089 | 5.13E-15 | -2.63127 | 1 | 1 AC011233.2       | -      |
| ENSG00000232090 | 5.13E-15 | -2.63127 | 1 | 1 AC016724.6       | K03012 |
| ENSG00000232091 | 5.13E-15 | -2.63127 | 1 | 1 PNLIPP1          | K09228 |
| ENSG00000232096 | 5.13E-15 | -2.63127 | 1 | 1 GS1-122H1.3      | -      |
| ENSG00000232097 | 5.13E-15 | -2.63127 | 1 | 1 AC079781.8       | K04257 |

|                 |          |          |   |                 |        |
|-----------------|----------|----------|---|-----------------|--------|
| ENSG00000232100 | 5.13E-15 | -2.63127 | 1 | 1 RP11-152L7.2  | -      |
| ENSG00000232101 | 5.13E-15 | -2.63127 | 1 | 1 AC108059.2    | K07604 |
| ENSG00000232102 | 5.13E-15 | -2.63127 | 1 | 1 MTCO3P2       | -      |
| ENSG00000232105 | 5.13E-15 | -2.63127 | 1 | 1 RPL32P28      | -      |
| ENSG00000232109 | 5.13E-15 | -2.63127 | 1 | 1 AL022344.2    | K04614 |
| ENSG00000232111 | 5.13E-15 | -2.63127 | 1 | 1 RP11-126O22.1 | K00653 |
| ENSG00000232113 | 5.13E-15 | -2.63127 | 1 | 1 RP11-360D2.1  | -      |
| ENSG00000232114 | 5.13E-15 | -2.63127 | 1 | 1 AC018693.5    | K01639 |
| ENSG00000232115 | 5.13E-15 | -2.63127 | 1 | 1 RP11-123G9.1  | -      |
| ENSG00000232116 | 5.13E-15 | -2.63127 | 1 | 1 RP11-187C18.2 | -      |
| ENSG00000232117 | 5.13E-15 | -2.63127 | 1 | 1 LINC00384     | -      |
| ENSG00000232120 | 5.13E-15 | -2.63127 | 1 | 1 RP11-349P19.1 | -      |
| ENSG00000232121 | 5.13E-15 | -2.63127 | 1 | 1 RP13-30A9.1   | -      |
| ENSG00000232125 | 5.13E-15 | -2.63127 | 1 | 1 DYTN          | -      |
| ENSG00000232128 | 5.13E-15 | -2.63127 | 1 | 1 AC097374.4    | -      |
| ENSG00000232130 | 5.13E-15 | -2.63127 | 1 | 1 RP11-143P4.2  | -      |
| ENSG00000232132 | 5.13E-15 | -2.63127 | 1 | 1 NDFIP2-AS1    | -      |
| ENSG00000232135 | 5.13E-15 | -2.63127 | 1 | 1 RP3-461P17.6  | K02268 |
| ENSG00000232136 | 5.13E-15 | -2.63127 | 1 | 1 DUXAP7        | K12479 |
| ENSG00000232138 | 5.13E-15 | -2.63127 | 1 | 1 IFNWP5        | K05440 |
| ENSG00000232139 | 5.13E-15 | -2.63127 | 1 | 1 LINC00867     | -      |
| ENSG00000232140 | 5.13E-15 | -2.63127 | 1 | 1 AC073257.1    | -      |
| ENSG00000232142 | 5.13E-15 | -2.63127 | 1 | 1 RP11-367H5.8  | K02975 |
| ENSG00000232144 | 5.13E-15 | -2.63127 | 1 | 1 PSAT1P2       | K00831 |
| ENSG00000232145 | 5.13E-15 | -2.63127 | 1 | 1 RP11-307I2.1  | K02898 |
| ENSG00000232148 | 5.13E-15 | -2.63127 | 1 | 1 FMO11P        | -      |
| ENSG00000232151 | 5.13E-15 | -2.63127 | 1 | 1 RP11-353N4.8  | -      |
| ENSG00000232153 | 5.13E-15 | -2.63127 | 1 | 1 AC073218.3    | -      |
| ENSG00000232154 | 5.13E-15 | -2.63127 | 1 | 1 RP11-193H5.5  | -      |
| ENSG00000232155 | 5.13E-15 | -2.63127 | 1 | 1 AF277315.19   | -      |
| ENSG00000232158 | 5.13E-15 | -2.63127 | 1 | 1 RP11-252O2.2  | -      |
| ENSG00000232159 | 5.13E-15 | -2.63127 | 1 | 1 RAB9BP1       | K07899 |
| ENSG00000232161 | 5.13E-15 | -2.63127 | 1 | 1 RP11-548K12.7 | -      |
| ENSG00000232163 | 5.13E-15 | -2.63127 | 1 | 1 RPLP1P13      | K02942 |
| ENSG00000232164 | 5.13E-15 | -2.63127 | 1 | 1 AC092669.3    | -      |
| ENSG00000232165 | 5.13E-15 | -2.63127 | 1 | 1 RP5-905H7.6   | K04614 |
| ENSG00000232167 | 5.13E-15 | -2.63127 | 1 | 1 AC137675.1    | -      |
| ENSG00000232168 | 5.13E-15 | -2.63127 | 1 | 1 RP11-180D15.1 | K04274 |
| ENSG00000232170 | 5.13E-15 | -2.63127 | 1 | 1 LINC00708     | -      |
| ENSG00000232172 | 5.13E-15 | -2.63127 | 1 | 1 RP11-57C19.2  | K02885 |
| ENSG00000232173 | 5.13E-15 | -2.63127 | 1 | 1 OR2H5P        | K04257 |
| ENSG00000232174 | 5.13E-15 | -2.63127 | 1 | 1 CTB-164L20.1  | K02865 |
| ENSG00000232175 | 5.13E-15 | -2.63127 | 1 | 1 RP4-659I19.1  | -      |
| ENSG00000232177 | 5.13E-15 | -2.63127 | 1 | 1 MTND4P24      | K03881 |
| ENSG00000232179 | 5.13E-15 | -2.63127 | 1 | 1 RP11-100G15.2 | -      |
| ENSG00000232183 | 5.13E-15 | -2.63127 | 1 | 1 RP6-27P15.2   | -      |
| ENSG00000232184 | 5.13E-15 | -2.63127 | 1 | 1 RP11-370K11.1 | -      |
| ENSG00000232185 | 5.13E-15 | -2.63127 | 1 | 1 CNOT7P2       | K12581 |
| ENSG00000232188 | 5.13E-15 | -2.63127 | 1 | 1 RP11-312J18.6 | -      |
| ENSG00000232190 | 5.13E-15 | -2.63127 | 1 | 1 RP11-134D3.1  | -      |
| ENSG00000232192 | 5.13E-15 | -2.63127 | 1 | 1 RP11-62I21.1  | -      |
| ENSG00000232193 | 5.13E-15 | -2.63127 | 1 | 1 AL157359.4    | -      |
| ENSG00000232195 | 5.13E-15 | -2.63127 | 1 | 1 TOMM22P2      | K17769 |
| ENSG00000232196 | 5.13E-15 | -2.63127 | 1 | 1 MTRNR2L4      | K01982 |
| ENSG00000232197 | 5.13E-15 | -2.63127 | 1 | 1 RP11-302L19.1 | -      |
| ENSG00000232198 | 5.13E-15 | -2.63127 | 1 | 1 RP4-633H17.2  | -      |
| ENSG00000232199 | 5.13E-15 | -2.63127 | 1 | 1 RPL3P8        | K02925 |
| ENSG00000232200 | 5.13E-15 | -2.63127 | 1 | 1 RP4-564O4.1   | -      |

|                 |          |          |   |                   |        |
|-----------------|----------|----------|---|-------------------|--------|
| ENSG00000232202 | 5.13E-15 | -2.63127 | 1 | 1 AC098824.6      | K16729 |
| ENSG00000232203 | 5.13E-15 | -2.63127 | 1 | 1 SLC25A6P2       | K05863 |
| ENSG00000232204 | 5.13E-15 | -2.63127 | 1 | 1 TET1P1          | K13097 |
| ENSG00000232205 | 5.13E-15 | -2.63127 | 1 | 1 CDY18P          | K00653 |
| ENSG00000232208 | 5.13E-15 | -2.63127 | 1 | 1 RP3-477M7.5     | K09230 |
| ENSG00000232210 | 5.13E-15 | -2.63127 | 1 | 1 PHBP15          | -      |
| ENSG00000232211 | 5.13E-15 | -2.63127 | 1 | 1 RP11-395D3.1    | -      |
| ENSG00000232212 | 5.13E-15 | -2.63127 | 1 | 1 RP11-398M15.1   | -      |
| ENSG00000232215 | 5.13E-15 | -2.63127 | 1 | 1 OR2L6P          | K04257 |
| ENSG00000232217 | 5.13E-15 | -2.63127 | 1 | 1 FTLP8           | K13625 |
| ENSG00000232220 | 5.13E-15 | -2.63127 | 1 | 1 AC008440.5      | -      |
| ENSG00000232222 | 5.13E-15 | -2.63127 | 1 | 1 RP3-434O14.8    | -      |
| ENSG00000232223 | 5.13E-15 | -2.63127 | 1 | 1 CNN2P10         | -      |
| ENSG00000232225 | 5.13E-15 | -2.63127 | 1 | 1 LINC01047       | -      |
| ENSG00000232226 | 5.13E-15 | -2.63127 | 1 | 1 ARSFP1          | K12374 |
| ENSG00000232227 | 5.13E-15 | -2.63127 | 1 | 1 AC013401.2      | -      |
| ENSG00000232230 | 5.13E-15 | -2.63127 | 1 | 1 TPM4P1          | K10375 |
| ENSG00000232234 | 5.13E-15 | -2.63127 | 1 | 1 RP11-203H2.1    | -      |
| ENSG00000232235 | 5.13E-15 | -2.63127 | 1 | 1 CDY3P           | K00653 |
| ENSG00000232238 | 5.13E-15 | -2.63127 | 1 | 1 AC017080.1      | K02980 |
| ENSG00000232239 | 5.13E-15 | -2.63127 | 1 | 1 RBPJP5          | K06053 |
| ENSG00000232240 | 5.13E-15 | -2.63127 | 1 | 1 RP5-1125M8.3    | -      |
| ENSG00000232241 | 5.13E-15 | -2.63127 | 1 | 1 DYNLT3P1        | K10420 |
| ENSG00000232242 | 5.13E-15 | -2.63127 | 1 | 1 ZYG11AP1        | -      |
| ENSG00000232243 | 5.13E-15 | -2.63127 | 1 | 1 RP11-408E5.5    | -      |
| ENSG00000232245 | 5.13E-15 | -2.63127 | 1 | 1 RP4-705F19.1    | -      |
| ENSG00000232249 | 5.13E-15 | -2.63127 | 1 | 1 LL0XNC01-37G1.2 | K01787 |
| ENSG00000232252 | 5.13E-15 | -2.63127 | 1 | 1 RP11-30L8.1     | -      |
| ENSG00000232254 | 5.13E-15 | -2.63127 | 1 | 1 CSF2RBP1        | K04738 |
| ENSG00000232258 | 5.13E-15 | -2.63127 | 1 | 1 TMEM114         | -      |
| ENSG00000232261 | 5.13E-15 | -2.63127 | 1 | 1 RP4-560B9.5     | -      |
| ENSG00000232263 | 5.13E-15 | -2.63127 | 1 | 1 KRTAP25-1       | -      |
| ENSG00000232264 | 5.13E-15 | -2.63127 | 1 | 1 USP17L24        | K11845 |
| ENSG00000232265 | 5.13E-15 | -2.63127 | 1 | 1 XXyac-YX155B6.5 | -      |
| ENSG00000232267 | 5.13E-15 | -2.63127 | 1 | 1 ACTR3P2         | K18584 |
| ENSG00000232268 | 5.13E-15 | -2.63127 | 1 | 1 OR52I1          | K04257 |
| ENSG00000232271 | 5.13E-15 | -2.63127 | 1 | 1 RP4-764O22.1    | -      |
| ENSG00000232273 | 5.13E-15 | -2.63127 | 1 | 1 FTH1P1          | K00522 |
| ENSG00000232277 | 5.13E-15 | -2.63127 | 1 | 1 AC104651.3      | K14693 |
| ENSG00000232281 | 5.13E-15 | -2.63127 | 1 | 1 IFNWP15         | K05440 |
| ENSG00000232282 | 5.13E-15 | -2.63127 | 1 | 1 MTND1P32        | K03878 |
| ENSG00000232283 | 5.13E-15 | -2.63127 | 1 | 1 RP11-240L7.4    | -      |
| ENSG00000232285 | 5.13E-15 | -2.63127 | 1 | 1 TCEB2P3         | -      |
| ENSG00000232286 | 5.13E-15 | -2.63127 | 1 | 1 RP11-80K6.2     | -      |
| ENSG00000232287 | 5.13E-15 | -2.63127 | 1 | 1 SLC6A1-AS1      | -      |
| ENSG00000232290 | 5.13E-15 | -2.63127 | 1 | 1 RP1-292B18.3    | -      |
| ENSG00000232292 | 5.13E-15 | -2.63127 | 1 | 1 ALDH7A1P2       | K14085 |
| ENSG00000232293 | 5.13E-15 | -2.63127 | 1 | 1 PAICSP7         | K01587 |
| ENSG00000232294 | 5.13E-15 | -2.63127 | 1 | 1 RP4-715N11.2    | -      |
| ENSG00000232296 | 5.13E-15 | -2.63127 | 1 | 1 RP11-510N19.2   | K12622 |
| ENSG00000232298 | 5.13E-15 | -2.63127 | 1 | 1 RP11-10N16.3    | -      |
| ENSG00000232299 | 5.13E-15 | -2.63127 | 1 | 1 RP1-105O18.1    | -      |
| ENSG00000232300 | 5.13E-15 | -2.63127 | 1 | 1 FAM215B         | -      |
| ENSG00000232301 | 5.13E-15 | -2.63127 | 1 | 1 RP11-132A1.3    | -      |
| ENSG00000232305 | 5.13E-15 | -2.63127 | 1 | 1 CLCP1           | -      |
| ENSG00000232306 | 5.13E-15 | -2.63127 | 1 | 1 AC012485.2      | -      |
| ENSG00000232307 | 5.13E-15 | -2.63127 | 1 | 1 DAOA-AS1        | -      |
| ENSG00000232309 | 5.13E-15 | -2.63127 | 1 | 1 GS1-122H1.1     | -      |

|                 |          |          |   |                    |        |
|-----------------|----------|----------|---|--------------------|--------|
| ENSG00000232311 | 5.13E-15 | -2.63127 | 1 | 1 RP1-249I4.2      | —      |
| ENSG00000232314 | 5.13E-15 | -2.63127 | 1 | 1 PSMC1P13         | K03062 |
| ENSG00000232325 | 5.13E-15 | -2.63127 | 1 | 1 AC093627.7       | —      |
| ENSG00000232327 | 5.13E-15 | -2.63127 | 1 | 1 RP11-395C17.1    | —      |
| ENSG00000232328 | 5.13E-15 | -2.63127 | 1 | 1 AC011286.1       | —      |
| ENSG00000232332 | 5.13E-15 | -2.63127 | 1 | 1 RP3-481A17.1     | K07949 |
| ENSG00000232333 | 5.13E-15 | -2.63127 | 1 | 1 RPS27AP2         | K02977 |
| ENSG00000232334 | 5.13E-15 | -2.63127 | 1 | 1 RP11-47G11.2     | —      |
| ENSG00000232335 | 5.13E-15 | -2.63127 | 1 | 1 RP11-435D7.3     | —      |
| ENSG00000232337 | 5.13E-15 | -2.63127 | 1 | 1 AC009313.2       | K13179 |
| ENSG00000232341 | 5.13E-15 | -2.63127 | 1 | 1 RPL4P2           | K02930 |
| ENSG00000232342 | 5.13E-15 | -2.63127 | 1 | 1 RP11-46O21.2     | —      |
| ENSG00000232344 | 5.13E-15 | -2.63127 | 1 | 1 AC087163.2       | K02981 |
| ENSG00000232347 | 5.13E-15 | -2.63127 | 1 | 1 RP11-488L18.8    | —      |
| ENSG00000232348 | 5.13E-15 | -2.63127 | 1 | 1 LINC00279        | —      |
| ENSG00000232349 | 5.13E-15 | -2.63127 | 1 | 1 YBX1P7           | —      |
| ENSG00000232350 | 5.13E-15 | -2.63127 | 1 | 1 LL22NC03-102D1.1 | —      |
| ENSG00000232353 | 5.13E-15 | -2.63127 | 1 | 1 RP11-655G22.1    | —      |
| ENSG00000232354 | 5.13E-15 | -2.63127 | 1 | 1 VIPR1-AS1        | —      |
| ENSG00000232358 | 5.13E-15 | -2.63127 | 1 | 1 RP5-955M13.4     | —      |
| ENSG00000232359 | 5.13E-15 | -2.63127 | 1 | 1 AC104777.1       | —      |
| ENSG00000232360 | 5.13E-15 | -2.63127 | 1 | 1 AP000281.2       | —      |
| ENSG00000232361 | 5.13E-15 | -2.63127 | 1 | 1 RP11-632K21.3    | K04969 |
| ENSG00000232363 | 5.13E-15 | -2.63127 | 1 | 1 RP1-102D24.5     | —      |
| ENSG00000232366 | 5.13E-15 | -2.63127 | 1 | 1 VDAC1P9          | K05862 |
| ENSG00000232368 | 5.13E-15 | -2.63127 | 1 | 1 FTLP2            | K13625 |
| ENSG00000232369 | 5.13E-15 | -2.63127 | 1 | 1 RP5-882O7.4      | K03767 |
| ENSG00000232370 | 5.13E-15 | -2.63127 | 1 | 1 AF241726.2       | K09555 |
| ENSG00000232373 | 5.13E-15 | -2.63127 | 1 | 1 MTCYBP3          | K00412 |
| ENSG00000232374 | 5.13E-15 | -2.63127 | 1 | 1 GPR79            | K08377 |
| ENSG00000232375 | 5.13E-15 | -2.63127 | 1 | 1 RP11-136C24.1    | —      |
| ENSG00000232377 | 5.13E-15 | -2.63127 | 1 | 1 AC016910.1       | —      |
| ENSG00000232378 | 5.13E-15 | -2.63127 | 1 | 1 RPL29P28         | K02905 |
| ENSG00000232379 | 5.13E-15 | -2.63127 | 1 | 1 RP11-308D16.1    | K02891 |
| ENSG00000232380 | 5.13E-15 | -2.63127 | 1 | 1 ZDHHC20P4        | K18932 |
| ENSG00000232381 | 5.13E-15 | -2.63127 | 1 | 1 OR52U1P          | K04257 |
| ENSG00000232382 | 5.13E-15 | -2.63127 | 1 | 1 OR5K1            | K04257 |
| ENSG00000232383 | 5.13E-15 | -2.63127 | 1 | 1 AC010677.5       | K02894 |
| ENSG00000232384 | 5.13E-15 | -2.63127 | 1 | 1 RP11-204I15.1    | —      |
| ENSG00000232390 | 5.13E-15 | -2.63127 | 1 | 1 NDUFA5P1         | K03949 |
| ENSG00000232391 | 5.13E-15 | -2.63127 | 1 | 1 RANP2            | K07936 |
| ENSG00000232392 | 5.13E-15 | -2.63127 | 1 | 1 AC002366.3       | K14455 |
| ENSG00000232393 | 5.13E-15 | -2.63127 | 1 | 1 RPL5P6           | K02932 |
| ENSG00000232394 | 5.13E-15 | -2.63127 | 1 | 1 AC090696.2       | —      |
| ENSG00000232395 | 5.13E-15 | -2.63127 | 1 | 1 RP3-399L15.1     | —      |
| ENSG00000232399 | 5.13E-15 | -2.63127 | 1 | 1 USP17L13         | K11845 |
| ENSG00000232400 | 5.13E-15 | -2.63127 | 1 | 1 RAD17P1          | K06662 |
| ENSG00000232401 | 5.13E-15 | -2.63127 | 1 | 1 LINC00112        | —      |
| ENSG00000232403 | 5.13E-15 | -2.63127 | 1 | 1 RP11-511I11.1    | —      |
| ENSG00000232407 | 5.13E-15 | -2.63127 | 1 | 1 RP11-641C17.2    | K03767 |
| ENSG00000232408 | 5.13E-15 | -2.63127 | 1 | 1 AC140481.4       | —      |
| ENSG00000232409 | 5.13E-15 | -2.63127 | 1 | 1 AC019185.3       | —      |
| ENSG00000232411 | 5.13E-15 | -2.63127 | 1 | 1 AC009495.3       | —      |
| ENSG00000232413 | 5.13E-15 | -2.63127 | 1 | 1 RP11-343J18.2    | —      |
| ENSG00000232415 | 5.13E-15 | -2.63127 | 1 | 1 CTB-51J22.1      | —      |
| ENSG00000232416 | 5.13E-15 | -2.63127 | 1 | 1 BPESC1           | —      |
| ENSG00000232417 | 5.13E-15 | -2.63127 | 1 | 1 CT45A3           | —      |
| ENSG00000232418 | 5.13E-15 | -2.63127 | 1 | 1 RP11-678B3.1     | K04728 |

|                 |          |          |   |                    |        |
|-----------------|----------|----------|---|--------------------|--------|
| ENSG00000232419 | 5.13E-15 | -2.63127 | 1 | 1 TTTY19           | _      |
| ENSG00000232420 | 5.13E-15 | -2.63127 | 1 | 1 IL9RP2           | K05073 |
| ENSG00000232422 | 5.13E-15 | -2.63127 | 1 | 1 KNOP1P4          | _      |
| ENSG00000232423 | 5.13E-15 | -2.63127 | 1 | 1 PRAMEF6          | _      |
| ENSG00000232424 | 5.13E-15 | -2.63127 | 1 | 1 USP9YP29         | K11840 |
| ENSG00000232426 | 5.13E-15 | -2.63127 | 1 | 1 RP11-508M1.7     | _      |
| ENSG00000232429 | 5.13E-15 | -2.63127 | 1 | 1 RPL21P131        | K02889 |
| ENSG00000232430 | 5.13E-15 | -2.63127 | 1 | 1 RPL31P15         | K02910 |
| ENSG00000232431 | 5.13E-15 | -2.63127 | 1 | 1 RP11-578F21.10   | K08657 |
| ENSG00000232433 | 5.13E-15 | -2.63127 | 1 | 1 RP11-341A11.2    | K13676 |
| ENSG00000232436 | 5.13E-15 | -2.63127 | 1 | 1 RP11-103C3.1     | _      |
| ENSG00000232437 | 5.13E-15 | -2.63127 | 1 | 1 RP11-487I5.4     | _      |
| ENSG00000232438 | 5.13E-15 | -2.63127 | 1 | 1 CTSLP7           | K01365 |
| ENSG00000232444 | 5.13E-15 | -2.63127 | 1 | 1 AC010745.4       | _      |
| ENSG00000232446 | 5.13E-15 | -2.63127 | 1 | 1 RP13-60P5.2      | _      |
| ENSG00000232447 | 5.13E-15 | -2.63127 | 1 | 1 MTND5P3          | K03883 |
| ENSG00000232455 | 5.13E-15 | -2.63127 | 1 | 1 LARS2-AS1        | _      |
| ENSG00000232458 | 5.13E-15 | -2.63127 | 1 | 1 AC005029.1       | _      |
| ENSG00000232459 | 5.13E-15 | -2.63127 | 1 | 1 OR4F14P          | K04257 |
| ENSG00000232461 | 5.13E-15 | -2.63127 | 1 | 1 RP11-644C3.1     | _      |
| ENSG00000232462 | 5.13E-15 | -2.63127 | 1 | 1 RP11-13E1.5      | _      |
| ENSG00000232463 | 5.13E-15 | -2.63127 | 1 | 1 RP11-195C7.2     | K02873 |
| ENSG00000232464 | 5.13E-15 | -2.63127 | 1 | 1 CTA-125H2.1      | _      |
| ENSG00000232465 | 5.13E-15 | -2.63127 | 1 | 1 RP5-1022J11.2    | _      |
| ENSG00000232466 | 5.13E-15 | -2.63127 | 1 | 1 RP11-337A23.5    | K11253 |
| ENSG00000232467 | 5.13E-15 | -2.63127 | 1 | 1 TMA16P2          | K14860 |
| ENSG00000232471 | 5.13E-15 | -2.63127 | 1 | 1 RP11-241F15.7    | K17299 |
| ENSG00000232474 | 5.13E-15 | -2.63127 | 1 | 1 NCKAP5-IT1       | _      |
| ENSG00000232475 | 5.13E-15 | -2.63127 | 1 | 1 HSFY5P           | _      |
| ENSG00000232478 | 5.13E-15 | -2.63127 | 1 | 1 CT45A1           | _      |
| ENSG00000232482 | 5.13E-15 | -2.63127 | 1 | 1 RP4-654C18.1     | K03111 |
| ENSG00000232489 | 5.13E-15 | -2.63127 | 1 | 1 MFAP1P1          | K13110 |
| ENSG00000232492 | 5.13E-15 | -2.63127 | 1 | 1 NPM1P13          | K11276 |
| ENSG00000232493 | 5.13E-15 | -2.63127 | 1 | 1 RPL12P11         | K02870 |
| ENSG00000232494 | 5.13E-15 | -2.63127 | 1 | 1 RP11-403N16.2    | _      |
| ENSG00000232495 | 5.13E-15 | -2.63127 | 1 | 1 AC069287.1       | _      |
| ENSG00000232496 | 5.13E-15 | -2.63127 | 1 | 1 RPL3P12          | K02925 |
| ENSG00000232497 | 5.13E-15 | -2.63127 | 1 | 1 ADIPOR1P1        | K07297 |
| ENSG00000232498 | 5.13E-15 | -2.63127 | 1 | 1 RP5-1011O1.2     | _      |
| ENSG00000232500 | 5.13E-15 | -2.63127 | 1 | 1 AP005273.1       | _      |
| ENSG00000232502 | 5.13E-15 | -2.63127 | 1 | 1 AC073464.7       | _      |
| ENSG00000232503 | 5.13E-15 | -2.63127 | 1 | 1 CYCSP8           | _      |
| ENSG00000232505 | 5.13E-15 | -2.63127 | 1 | 1 XXbac-BPG308J9.3 | _      |
| ENSG00000232508 | 5.13E-15 | -2.63127 | 1 | 1 MRPL45P1         | K17426 |
| ENSG00000232511 | 5.13E-15 | -2.63127 | 1 | 1 OR2AH1P          | K04257 |
| ENSG00000232512 | 5.13E-15 | -2.63127 | 1 | 1 7SK              | _      |
| ENSG00000232514 | 5.13E-15 | -2.63127 | 1 | 1 RP11-329A14.2    | K02889 |
| ENSG00000232515 | 5.13E-15 | -2.63127 | 1 | 1 LL22NC03-75A1.9  | _      |
| ENSG00000232517 | 5.13E-15 | -2.63127 | 1 | 1 AC112198.1       | K08115 |
| ENSG00000232518 | 5.13E-15 | -2.63127 | 1 | 1 AC074366.3       | _      |
| ENSG00000232520 | 5.13E-15 | -2.63127 | 1 | 1 AC012507.3       | _      |
| ENSG00000232522 | 5.13E-15 | -2.63127 | 1 | 1 ZNF886P          | K09228 |
| ENSG00000232524 | 5.13E-15 | -2.63127 | 1 | 1 RP11-332K15.1    | _      |
| ENSG00000232525 | 5.13E-15 | -2.63127 | 1 | 1 SS18L2P1         | _      |
| ENSG00000232528 | 5.13E-15 | -2.63127 | 1 | 1 RP4-673D20.3     | _      |
| ENSG00000232529 | 5.13E-15 | -2.63127 | 1 | 1 RP1-257I9.2      | _      |
| ENSG00000232530 | 5.13E-15 | -2.63127 | 1 | 1 RP1-102K2.6      | _      |
| ENSG00000232532 | 5.13E-15 | -2.63127 | 1 | 1 RP11-63K6.7      | _      |

|                 |          |          |   |                    |        |
|-----------------|----------|----------|---|--------------------|--------|
| ENSG00000232535 | 5.13E-15 | -2.63127 | 1 | 1 OR5H8P           | K04257 |
| ENSG00000232537 | 5.13E-15 | -2.63127 | 1 | 1 RP11-385M4.1     | -      |
| ENSG00000232539 | 5.13E-15 | -2.63127 | 1 | 1 LINC00945        | -      |
| ENSG00000232542 | 5.13E-15 | -2.63127 | 1 | 1 DPYD-IT1         | -      |
| ENSG00000232543 | 5.13E-15 | -2.63127 | 1 | 1 IGHD4-11         | -      |
| ENSG00000232548 | 5.13E-15 | -2.63127 | 1 | 1 AC010744.1       | -      |
| ENSG00000232549 | 5.13E-15 | -2.63127 | 1 | 1 SRD5A1P1         | K12343 |
| ENSG00000232551 | 5.13E-15 | -2.63127 | 1 | 1 RP11-233E12.2    | K02256 |
| ENSG00000232554 | 5.13E-15 | -2.63127 | 1 | 1 RSU1P2           | -      |
| ENSG00000232556 | 5.13E-15 | -2.63127 | 1 | 1 AC092570.4       | K01285 |
| ENSG00000232557 | 5.13E-15 | -2.63127 | 1 | 1 RP11-4M23.3      | -      |
| ENSG00000232558 | 5.13E-15 | -2.63127 | 1 | 1 KCND3-IT1        | -      |
| ENSG00000232562 | 5.13E-15 | -2.63127 | 1 | 1 TPMTP3           | K00569 |
| ENSG00000232563 | 5.13E-15 | -2.63127 | 1 | 1 AC026214.2       | -      |
| ENSG00000232567 | 5.13E-15 | -2.63127 | 1 | 1 GLUD1P8          | K00261 |
| ENSG00000232576 | 5.13E-15 | -2.63127 | 1 | 1 RP11-137D19.1    | K06689 |
| ENSG00000232579 | 5.13E-15 | -2.63127 | 1 | 1 CTD-3105H18.10   | -      |
| ENSG00000232581 | 5.13E-15 | -2.63127 | 1 | 1 AC079742.4       | -      |
| ENSG00000232582 | 5.13E-15 | -2.63127 | 1 | 1 RP11-85L21.5     | -      |
| ENSG00000232583 | 5.13E-15 | -2.63127 | 1 | 1 GPR143P          | -      |
| ENSG00000232585 | 5.13E-15 | -2.63127 | 1 | 1 OFD1P12Y         | K16480 |
| ENSG00000232590 | 5.13E-15 | -2.63127 | 1 | 1 RP11-128I7.1     | -      |
| ENSG00000232591 | 5.13E-15 | -2.63127 | 1 | 1 RP5-1031D4.2     | -      |
| ENSG00000232593 | 5.13E-15 | -2.63127 | 1 | 1 LINC01155        | -      |
| ENSG00000232594 | 5.13E-15 | -2.63127 | 1 | 1 AC103563.3       | -      |
| ENSG00000232595 | 5.13E-15 | -2.63127 | 1 | 1 CST2P1           | -      |
| ENSG00000232596 | 5.13E-15 | -2.63127 | 1 | 1 RP1-37J18.2      | -      |
| ENSG00000232597 | 5.13E-15 | -2.63127 | 1 | 1 AC013727.1       | -      |
| ENSG00000232598 | 5.13E-15 | -2.63127 | 1 | 1 RP1-90K10.4      | -      |
| ENSG00000232599 | 5.13E-15 | -2.63127 | 1 | 1 RP1-161N10.1     | -      |
| ENSG00000232601 | 5.13E-15 | -2.63127 | 1 | 1 RP11-393N4.1     | -      |
| ENSG00000232603 | 5.13E-15 | -2.63127 | 1 | 1 LL22NC03-22A12.1 | -      |
| ENSG00000232604 | 5.13E-15 | -2.63127 | 1 | 1 AC010967.3       | -      |
| ENSG00000232605 | 5.13E-15 | -2.63127 | 1 | 1 HMGN2P11         | K11300 |
| ENSG00000232606 | 5.13E-15 | -2.63127 | 1 | 1 AC010090.1       | -      |
| ENSG00000232610 | 5.13E-15 | -2.63127 | 1 | 1 CCT6P4           | K09498 |
| ENSG00000232612 | 5.13E-15 | -2.63127 | 1 | 1 RPL31P35         | K02910 |
| ENSG00000232613 | 5.13E-15 | -2.63127 | 1 | 1 AC007386.4       | -      |
| ENSG00000232614 | 5.13E-15 | -2.63127 | 1 | 1 USP9YP9          | -      |
| ENSG00000232617 | 5.13E-15 | -2.63127 | 1 | 1 AC017019.1       | K12885 |
| ENSG00000232620 | 5.13E-15 | -2.63127 | 1 | 1 TSPY17P          | K11284 |
| ENSG00000232622 | 5.13E-15 | -2.63127 | 1 | 1 RP11-484D4.3     | K02978 |
| ENSG00000232624 | 5.13E-15 | -2.63127 | 1 | 1 RP11-478H13.3    | -      |
| ENSG00000232625 | 5.13E-15 | -2.63127 | 1 | 1 AC009974.11      | K02893 |
| ENSG00000232626 | 5.13E-15 | -2.63127 | 1 | 1 RP11-175B9.2     | K09574 |
| ENSG00000232629 | 5.13E-15 | -2.63127 | 1 | 1 HLA-DQB2         | K06752 |
| ENSG00000232631 | 5.13E-15 | -2.63127 | 1 | 1 MTND2P23         | -      |
| ENSG00000232633 | 5.13E-15 | -2.63127 | 1 | 1 CTD-2201G3.1     | -      |
| ENSG00000232634 | 5.13E-15 | -2.63127 | 1 | 1 NEFLP1           | -      |
| ENSG00000232636 | 5.13E-15 | -2.63127 | 1 | 1 RP11-342C20.2    | -      |
| ENSG00000232638 | 5.13E-15 | -2.63127 | 1 | 1 RP11-379F12.4    | -      |
| ENSG00000232642 | 5.13E-15 | -2.63127 | 1 | 1 AC008073.7       | -      |
| ENSG00000232643 | 5.13E-15 | -2.63127 | 1 | 1 LINC00385        | -      |
| ENSG00000232644 | 5.13E-15 | -2.63127 | 1 | 1 GS1-466O4.3      | -      |
| ENSG00000232647 | 5.13E-15 | -2.63127 | 1 | 1 POLR3KP1         | K03019 |
| ENSG00000232653 | 5.13E-15 | -2.63127 | 1 | 1 GOLGA8N          | K10595 |
| ENSG00000232654 | 5.13E-15 | -2.63127 | 1 | 1 FAM136BP         | -      |
| ENSG00000232655 | 5.13E-15 | -2.63127 | 1 | 1 CTA-397C4.2      | -      |



|                 |          |          |   |                   |        |
|-----------------|----------|----------|---|-------------------|--------|
| ENSG00000232658 | 5.13E-15 | -2.63127 | 1 | 1 AC092638.1      | K15282 |
| ENSG00000232661 | 5.13E-15 | -2.63127 | 1 | 1 AC000111.3      | -      |
| ENSG00000232663 | 5.13E-15 | -2.63127 | 1 | 1 RP3-477M7.6     | K02261 |
| ENSG00000232664 | 5.13E-15 | -2.63127 | 1 | 1 LARP1BP3        | K18757 |
| ENSG00000232665 | 5.13E-15 | -2.63127 | 1 | 1 PHBP10          | K17080 |
| ENSG00000232667 | 5.13E-15 | -2.63127 | 1 | 1 AC004862.6      | -      |
| ENSG00000232668 | 5.13E-15 | -2.63127 | 1 | 1 AC010967.1      | -      |
| ENSG00000232672 | 5.13E-15 | -2.63127 | 1 | 1 RP4-706L14.2    | K05692 |
| ENSG00000232675 | 5.13E-15 | -2.63127 | 1 | 1 RP4-718D20.3    | -      |
| ENSG00000232676 | 5.13E-15 | -2.63127 | 1 | 1 ADH5P2          | K00121 |
| ENSG00000232678 | 5.13E-15 | -2.63127 | 1 | 1 SPTLC1P4        | K00654 |
| ENSG00000232679 | 5.13E-15 | -2.63127 | 1 | 1 RP11-400N13.3   | -      |
| ENSG00000232680 | 5.13E-15 | -2.63127 | 1 | 1 AC002511.3      | -      |
| ENSG00000232682 | 5.13E-15 | -2.63127 | 1 | 1 RP11-388P9.2    | -      |
| ENSG00000232685 | 5.13E-15 | -2.63127 | 1 | 1 LINC00442       | -      |
| ENSG00000232686 | 5.13E-15 | -2.63127 | 1 | 1 ARID4B-IT1      | -      |
| ENSG00000232687 | 5.13E-15 | -2.63127 | 1 | 1 RPL12P9         | -      |
| ENSG00000232688 | 5.13E-15 | -2.63127 | 1 | 1 AC007403.1      | -      |
| ENSG00000232690 | 5.13E-15 | -2.63127 | 1 | 1 HSPE1P9         | K04078 |
| ENSG00000232694 | 5.13E-15 | -2.63127 | 1 | 1 XX-CR54.3       | -      |
| ENSG00000232695 | 5.13E-15 | -2.63127 | 1 | 1 TCEB1P17        | -      |
| ENSG00000232696 | 5.13E-15 | -2.63127 | 1 | 1 AC017006.2      | -      |
| ENSG00000232698 | 5.13E-15 | -2.63127 | 1 | 1 AP001058.3      | -      |
| ENSG00000232701 | 5.13E-15 | -2.63127 | 1 | 1 RPL21P108       | K02889 |
| ENSG00000232706 | 5.13E-15 | -2.63127 | 1 | 1 NUTM2HP         | -      |
| ENSG00000232707 | 5.13E-15 | -2.63127 | 1 | 1 AP1B1P2         | K12392 |
| ENSG00000232710 | 5.13E-15 | -2.63127 | 1 | 1 RP4-669P10.16   | -      |
| ENSG00000232714 | 5.13E-15 | -2.63127 | 1 | 1 MTND3P8         | -      |
| ENSG00000232715 | 5.13E-15 | -2.63127 | 1 | 1 LINC01022       | -      |
| ENSG00000232716 | 5.13E-15 | -2.63127 | 1 | 1 AC016831.6      | -      |
| ENSG00000232717 | 5.13E-15 | -2.63127 | 1 | 1 TRIM51JP        | K12019 |
| ENSG00000232718 | 5.13E-15 | -2.63127 | 1 | 1 GAPDHP48        | K00134 |
| ENSG00000232719 | 5.13E-15 | -2.63127 | 1 | 1 RP11-13J8.1     | -      |
| ENSG00000232721 | 5.13E-15 | -2.63127 | 1 | 1 RP11-403I13.5   | -      |
| ENSG00000232722 | 5.13E-15 | -2.63127 | 1 | 1 MROH4P          | -      |
| ENSG00000232723 | 5.13E-15 | -2.63127 | 1 | 1 AC013399.3      | K02962 |
| ENSG00000232728 | 5.13E-15 | -2.63127 | 1 | 1 PHB2P1          | K17081 |
| ENSG00000232729 | 5.13E-15 | -2.63127 | 1 | 1 AC083884.8      | -      |
| ENSG00000232730 | 5.13E-15 | -2.63127 | 1 | 1 FAM8A4P         | -      |
| ENSG00000232732 | 5.13E-15 | -2.63127 | 1 | 1 AC073043.1      | -      |
| ENSG00000232734 | 5.13E-15 | -2.63127 | 1 | 1 ATP5G1P7        | K02128 |
| ENSG00000232735 | 5.13E-15 | -2.63127 | 1 | 1 ATG4AP1         | K08342 |
| ENSG00000232736 | 5.13E-15 | -2.63127 | 1 | 1 AC007551.2      | K02437 |
| ENSG00000232738 | 5.13E-15 | -2.63127 | 1 | 1 RP5-986I17.2    | -      |
| ENSG00000232739 | 5.13E-15 | -2.63127 | 1 | 1 RP11-25G10.2    | -      |
| ENSG00000232740 | 5.13E-15 | -2.63127 | 1 | 1 AC062020.1      | -      |
| ENSG00000232743 | 5.13E-15 | -2.63127 | 1 | 1 XXyac-YM21GA2.1 | K09428 |
| ENSG00000232744 | 5.13E-15 | -2.63127 | 1 | 1 USP9YP16        | -      |
| ENSG00000232746 | 5.13E-15 | -2.63127 | 1 | 1 RP11-767C1.1    | -      |
| ENSG00000232747 | 5.13E-15 | -2.63127 | 1 | 1 IGKV1D-35       | -      |
| ENSG00000232748 | 5.13E-15 | -2.63127 | 1 | 1 ZNF668          | -      |
| ENSG00000232749 | 5.13E-15 | -2.63127 | 1 | 1 RP11-15B24.4    | -      |
| ENSG00000232750 | 5.13E-15 | -2.63127 | 1 | 1 RP11-177A2.5    | K02976 |
| ENSG00000232751 | 5.13E-15 | -2.63127 | 1 | 1 RP11-296O14.1   | K02898 |
| ENSG00000232752 | 5.13E-15 | -2.63127 | 1 | 1 RP5-837O21.5    | -      |
| ENSG00000232753 | 5.13E-15 | -2.63127 | 1 | 1 RP11-347K2.1    | -      |
| ENSG00000232754 | 5.13E-15 | -2.63127 | 1 | 1 RP1-85F18.6     | -      |
| ENSG00000232756 | 5.13E-15 | -2.63127 | 1 | 1 RP5-1185I7.1    | -      |

|                 |          |          |   |                   |        |
|-----------------|----------|----------|---|-------------------|--------|
| ENSG00000232757 | 5.13E-15 | -2.63127 | 1 | 1 ETF1P1          | K03265 |
| ENSG00000232760 | 5.13E-15 | -2.63127 | 1 | 1 AC103564.6      | -      |
| ENSG00000232764 | 5.13E-15 | -2.63127 | 1 | 1 TRIM60P8Y       | K12029 |
| ENSG00000232765 | 5.13E-15 | -2.63127 | 1 | 1 RP11-382F24.2   | -      |
| ENSG00000232766 | 5.13E-15 | -2.63127 | 1 | 1 AC098614.3      | -      |
| ENSG00000232767 | 5.13E-15 | -2.63127 | 1 | 1 RP11-498B4.5    | -      |
| ENSG00000232771 | 5.13E-15 | -2.63127 | 1 | 1 PPP1R26P5       | K17565 |
| ENSG00000232772 | 5.13E-15 | -2.63127 | 1 | 1 MTND4P22        | K03881 |
| ENSG00000232773 | 5.13E-15 | -2.63127 | 1 | 1 RP11-1396O13.15 | -      |
| ENSG00000232778 | 5.13E-15 | -2.63127 | 1 | 1 RPL23AP50       | K02893 |
| ENSG00000232780 | 5.13E-15 | -2.63127 | 1 | 1 RP5-871G17.5    | K00134 |
| ENSG00000232783 | 5.13E-15 | -2.63127 | 1 | 1 AC073135.3      | -      |
| ENSG00000232784 | 5.13E-15 | -2.63127 | 1 | 1 AC067961.1      | -      |
| ENSG00000232786 | 5.13E-15 | -2.63127 | 1 | 1 TIMM9P3         | K17777 |
| ENSG00000232787 | 5.13E-15 | -2.63127 | 1 | 1 OR7L1P          | -      |
| ENSG00000232788 | 5.13E-15 | -2.63127 | 1 | 1 AC078883.3      | -      |
| ENSG00000232789 | 5.13E-15 | -2.63127 | 1 | 1 AC053503.2      | K07817 |
| ENSG00000232790 | 5.13E-15 | -2.63127 | 1 | 1 LINC01162       | -      |
| ENSG00000232791 | 5.13E-15 | -2.63127 | 1 | 1 OR11I1P         | K04257 |
| ENSG00000232793 | 5.13E-15 | -2.63127 | 1 | 1 DNAJC19P8       | K09539 |
| ENSG00000232794 | 5.13E-15 | -2.63127 | 1 | 1 HNRNPDP1        | K13044 |
| ENSG00000232795 | 5.13E-15 | -2.63127 | 1 | 1 SCAND3P1        | -      |
| ENSG00000232797 | 5.13E-15 | -2.63127 | 1 | 1 FAM207CP        | -      |
| ENSG00000232798 | 5.13E-15 | -2.63127 | 1 | 1 RP11-204M4.1    | -      |
| ENSG00000232799 | 5.13E-15 | -2.63127 | 1 | 1 CRYGFP          | -      |
| ENSG00000232800 | 5.13E-15 | -2.63127 | 1 | 1 SLC7A15P        | -      |
| ENSG00000232801 | 5.13E-15 | -2.63127 | 1 | 1 SDCBPP3         | K17254 |
| ENSG00000232805 | 5.13E-15 | -2.63127 | 1 | 1 NIP7P1          | K07565 |
| ENSG00000232806 | 5.13E-15 | -2.63127 | 1 | 1 AP001610.9      | -      |
| ENSG00000232808 | 5.13E-15 | -2.63127 | 1 | 1 TTTY20          | -      |
| ENSG00000232809 | 5.13E-15 | -2.63127 | 1 | 1 VDAC1P10        | K05862 |
| ENSG00000232810 | 5.13E-15 | -2.63127 | 1 | 1 TNF             | K03156 |
| ENSG00000232812 | 5.13E-15 | -2.63127 | 1 | 1 RP11-459K23.2   | -      |
| ENSG00000232813 | 5.13E-15 | -2.63127 | 1 | 1 RP11-344N17.2   | -      |
| ENSG00000232815 | 5.13E-15 | -2.63127 | 1 | 1 LINC00537       | -      |
| ENSG00000232817 | 5.13E-15 | -2.63127 | 1 | 1 RP11-73B2.4     | -      |
| ENSG00000232821 | 5.13E-15 | -2.63127 | 1 | 1 AC003986.6      | -      |
| ENSG00000232823 | 5.13E-15 | -2.63127 | 1 | 1 TXNP1           | K03671 |
| ENSG00000232824 | 5.13E-15 | -2.63127 | 1 | 1 RP11-401A10.2   | -      |
| ENSG00000232825 | 5.13E-15 | -2.63127 | 1 | 1 RP5-896L10.1    | -      |
| ENSG00000232827 | 5.13E-15 | -2.63127 | 1 | 1 RP11-211N8.7    | -      |
| ENSG00000232828 | 5.13E-15 | -2.63127 | 1 | 1 AF196970.3      | -      |
| ENSG00000232829 | 5.13E-15 | -2.63127 | 1 | 1 GSTO3P          | K00799 |
| ENSG00000232830 | 5.13E-15 | -2.63127 | 1 | 1 RP11-144C15.1   | -      |
| ENSG00000232832 | 5.13E-15 | -2.63127 | 1 | 1 LMLN-AS1        | -      |
| ENSG00000232834 | 5.13E-15 | -2.63127 | 1 | 1 RP11-12D5.3     | K17284 |
| ENSG00000232835 | 5.13E-15 | -2.63127 | 1 | 1 AC107057.1      | -      |
| ENSG00000232837 | 5.13E-15 | -2.63127 | 1 | 1 AF064858.7      | -      |
| ENSG00000232841 | 5.13E-15 | -2.63127 | 1 | 1 AC098592.8      | -      |
| ENSG00000232842 | 5.13E-15 | -2.63127 | 1 | 1 RP5-961K14.1    | K11307 |
| ENSG00000232843 | 5.13E-15 | -2.63127 | 1 | 1 SNX18P2         | K17299 |
| ENSG00000232845 | 5.13E-15 | -2.63127 | 1 | 1 TRAPPC2P9       | -      |
| ENSG00000232846 | 5.13E-15 | -2.63127 | 1 | 1 SLC25A6P3       | -      |
| ENSG00000232848 | 5.13E-15 | -2.63127 | 1 | 1 CTA-215D11.4    | K02936 |
| ENSG00000232849 | 5.13E-15 | -2.63127 | 1 | 1 LINC00363       | -      |
| ENSG00000232851 | 5.13E-15 | -2.63127 | 1 | 1 ATP5J2P3        | K02130 |
| ENSG00000232852 | 5.13E-15 | -2.63127 | 1 | 1 CICP4           | K16941 |
| ENSG00000232853 | 5.13E-15 | -2.63127 | 1 | 1 LUZP4P1         | -      |

|                 |          |          |   |                 |        |
|-----------------|----------|----------|---|-----------------|--------|
| ENSG00000232855 | 5.13E-15 | -2.63127 | 1 | 1 AF131217.1    | -      |
| ENSG00000232857 | 5.13E-15 | -2.63127 | 1 | 1 KATNBL1P2     | -      |
| ENSG00000232858 | 5.13E-15 | -2.63127 | 1 | 1 RPL34P27      | K02915 |
| ENSG00000232863 | 5.13E-15 | -2.63127 | 1 | 1 RP11-327I22.1 | -      |
| ENSG00000232864 | 5.13E-15 | -2.63127 | 1 | 1 CTD-2090I13.2 | -      |
| ENSG00000232866 | 5.13E-15 | -2.63127 | 1 | 1 AL513478.1    | -      |
| ENSG00000232867 | 5.13E-15 | -2.63127 | 1 | 1 RP11-179D22.1 | K02929 |
| ENSG00000232869 | 5.13E-15 | -2.63127 | 1 | 1 TRBV29-1      | -      |
| ENSG00000232871 | 5.13E-15 | -2.63127 | 1 | 1 SEC1P         | K00718 |
| ENSG00000232873 | 5.13E-15 | -2.63127 | 1 | 1 AC046143.6    | K02893 |
| ENSG00000232875 | 5.13E-15 | -2.63127 | 1 | 1 HMGN2P35      | K11300 |
| ENSG00000232878 | 5.13E-15 | -2.63127 | 1 | 1 DPYD-AS1      | -      |
| ENSG00000232879 | 5.13E-15 | -2.63127 | 1 | 1 RP11-544M22.3 | K07390 |
| ENSG00000232880 | 5.13E-15 | -2.63127 | 1 | 1 RP3-453C12.8  | K03960 |
| ENSG00000232881 | 5.13E-15 | -2.63127 | 1 | 1 RPS10P21      | -      |
| ENSG00000232883 | 5.13E-15 | -2.63127 | 1 | 1 RP11-302I18.1 | K02941 |
| ENSG00000232884 | 5.13E-15 | -2.63127 | 1 | 1 AF127936.3    | -      |
| ENSG00000232885 | 5.13E-15 | -2.63127 | 1 | 1 GPC5-AS2      | -      |
| ENSG00000232886 | 5.13E-15 | -2.63127 | 1 | 1 AF212831.2    | -      |
| ENSG00000232887 | 5.13E-15 | -2.63127 | 1 | 1 AC006466.5    | -      |
| ENSG00000232889 | 5.13E-15 | -2.63127 | 1 | 1 AC087499.4    | K17287 |
| ENSG00000232891 | 5.13E-15 | -2.63127 | 1 | 1 RP11-136K14.1 | -      |
| ENSG00000232892 | 5.13E-15 | -2.63127 | 1 | 1 RP11-267N12.1 | -      |
| ENSG00000232893 | 5.13E-15 | -2.63127 | 1 | 1 AC019068.2    | -      |
| ENSG00000232894 | 5.13E-15 | -2.63127 | 1 | 1 MRPS31P2      | K17410 |
| ENSG00000232895 | 5.13E-15 | -2.63127 | 1 | 1 RP4-543J13.1  | -      |
| ENSG00000232896 | 5.13E-15 | -2.63127 | 1 | 1 RP11-410K21.2 | -      |
| ENSG00000232897 | 5.13E-15 | -2.63127 | 1 | 1 RP11-191L9.5  | K02937 |
| ENSG00000232899 | 5.13E-15 | -2.63127 | 1 | 1 CDY9P         | -      |
| ENSG00000232900 | 5.13E-15 | -2.63127 | 1 | 1 RP4-697P8.3   | -      |
| ENSG00000232903 | 5.13E-15 | -2.63127 | 1 | 1 LINC01166     | -      |
| ENSG00000232905 | 5.13E-15 | -2.63127 | 1 | 1 RP11-534I8.1  | K14801 |
| ENSG00000232906 | 5.13E-15 | -2.63127 | 1 | 1 RP11-746P2.3  | K09228 |
| ENSG00000232908 | 5.13E-15 | -2.63127 | 1 | 1 HSD17B7P1     | K13373 |
| ENSG00000232910 | 5.13E-15 | -2.63127 | 1 | 1 RAB9AP1       | K07899 |
| ENSG00000232913 | 5.13E-15 | -2.63127 | 1 | 1 RP11-429H9.4  | -      |
| ENSG00000232914 | 5.13E-15 | -2.63127 | 1 | 1 TRAPPC2P4     | -      |
| ENSG00000232915 | 5.13E-15 | -2.63127 | 1 | 1 AC097721.1    | K11971 |
| ENSG00000232916 | 5.13E-15 | -2.63127 | 1 | 1 HMGN2P27      | K11300 |
| ENSG00000232917 | 5.13E-15 | -2.63127 | 1 | 1 HSPE1P6       | K04078 |
| ENSG00000232918 | 5.13E-15 | -2.63127 | 1 | 1 RP11-366L18.1 | K02889 |
| ENSG00000232920 | 5.13E-15 | -2.63127 | 1 | 1 RP11-465M18.1 | -      |
| ENSG00000232922 | 5.13E-15 | -2.63127 | 1 | 1 AC004112.5    | -      |
| ENSG00000232924 | 5.13E-15 | -2.63127 | 1 | 1 TCEB1P4       | -      |
| ENSG00000232925 | 5.13E-15 | -2.63127 | 1 | 1 MRPS16P2      | K02959 |
| ENSG00000232927 | 5.13E-15 | -2.63127 | 1 | 1 USP12PY       | K11842 |
| ENSG00000232928 | 5.13E-15 | -2.63127 | 1 | 1 DDX3YP1       | K17642 |
| ENSG00000232930 | 5.13E-15 | -2.63127 | 1 | 1 AC083864.3    | -      |
| ENSG00000232934 | 5.13E-15 | -2.63127 | 1 | 1 RP11-324O2.3  | -      |
| ENSG00000232935 | 5.13E-15 | -2.63127 | 1 | 1 RP11-223P11.2 | -      |
| ENSG00000232937 | 5.13E-15 | -2.63127 | 1 | 1 RP11-98D18.2  | -      |
| ENSG00000232939 | 5.13E-15 | -2.63127 | 1 | 1 RP11-406O23.2 | -      |
| ENSG00000232940 | 5.13E-15 | -2.63127 | 1 | 1 HCG25         | -      |
| ENSG00000232941 | 5.13E-15 | -2.63127 | 1 | 1 AC090186.1    | -      |
| ENSG00000232943 | 5.13E-15 | -2.63127 | 1 | 1 RP4-717M23.2  | K00682 |
| ENSG00000232944 | 5.13E-15 | -2.63127 | 1 | 1 RP13-492C18.1 | -      |
| ENSG00000232946 | 5.13E-15 | -2.63127 | 1 | 1 RP11-390F4.2  | K02917 |
| ENSG00000232947 | 5.13E-15 | -2.63127 | 1 | 1 RP11-401E14.2 | -      |

|                 |          |          |   |                 |        |
|-----------------|----------|----------|---|-----------------|--------|
| ENSG00000232948 | 5.13E-15 | -2.63127 | 1 | 1 DEFB130       | —      |
| ENSG00000232950 | 5.13E-15 | -2.63127 | 1 | 1 RP11-36D19.4  | K09228 |
| ENSG00000232951 | 5.13E-15 | -2.63127 | 1 | 1 IPO7P1        | —      |
| ENSG00000232952 | 5.13E-15 | -2.63127 | 1 | 1 RP11-90H3.1   | K13213 |
| ENSG00000232953 | 5.13E-15 | -2.63127 | 1 | 1 HSPA8P18      | K03283 |
| ENSG00000232954 | 5.13E-15 | -2.63127 | 1 | 1 LINC00374     | —      |
| ENSG00000232958 | 5.13E-15 | -2.63127 | 1 | 1 AC091069.1    | —      |
| ENSG00000232959 | 5.13E-15 | -2.63127 | 1 | 1 RP11-332H17.1 | —      |
| ENSG00000232963 | 5.13E-15 | -2.63127 | 1 | 1 HMGN2P20      | K11300 |
| ENSG00000232964 | 5.13E-15 | -2.63127 | 1 | 1 RP11-543E8.1  | —      |
| ENSG00000232965 | 5.13E-15 | -2.63127 | 1 | 1 RPS12P18      | K02951 |
| ENSG00000232968 | 5.13E-15 | -2.63127 | 1 | 1 AC008163.6    | —      |
| ENSG00000232969 | 5.13E-15 | -2.63127 | 1 | 1 AP001062.9    | —      |
| ENSG00000232970 | 5.13E-15 | -2.63127 | 1 | 1 POLHP1        | K03509 |
| ENSG00000232971 | 5.13E-15 | -2.63127 | 1 | 1 RP11-293A10.3 | —      |
| ENSG00000232975 | 5.13E-15 | -2.63127 | 1 | 1 RP5-945F2.1   | K02256 |
| ENSG00000232976 | 5.13E-15 | -2.63127 | 1 | 1 TRIM60P10Y    | K12029 |
| ENSG00000232977 | 5.13E-15 | -2.63127 | 1 | 1 LINC00327     | —      |
| ENSG00000232978 | 5.13E-15 | -2.63127 | 1 | 1 RP11-146N23.4 | —      |
| ENSG00000232979 | 5.13E-15 | -2.63127 | 1 | 1 AC092580.2    | —      |
| ENSG00000232981 | 5.13E-15 | -2.63127 | 1 | 1 RP11-117O7.2  | K02256 |
| ENSG00000232982 | 5.13E-15 | -2.63127 | 1 | 1 AC092662.2    | —      |
| ENSG00000232983 | 5.13E-15 | -2.63127 | 1 | 1 RP11-296L22.7 | —      |
| ENSG00000232985 | 5.13E-15 | -2.63127 | 1 | 1 RP11-442O18.1 | —      |
| ENSG00000232986 | 5.13E-15 | -2.63127 | 1 | 1 RP11-179A7.2  | —      |
| ENSG00000232989 | 5.13E-15 | -2.63127 | 1 | 1 RP11-136B18.1 | —      |
| ENSG00000232990 | 5.13E-15 | -2.63127 | 1 | 1 MTATP6P7      | —      |
| ENSG00000232991 | 5.13E-15 | -2.63127 | 1 | 1 GACAT1        | —      |
| ENSG00000232992 | 5.13E-15 | -2.63127 | 1 | 1 AHCYP4        | K01251 |
| ENSG00000232993 | 5.13E-15 | -2.63127 | 1 | 1 RP11-334A14.5 | —      |
| ENSG00000232994 | 5.13E-15 | -2.63127 | 1 | 1 RPL7P14       | —      |
| ENSG00000232998 | 5.13E-15 | -2.63127 | 1 | 1 VPS13A-AS1    | —      |
| ENSG00000232999 | 5.13E-15 | -2.63127 | 1 | 1 RP1-90J20.10  | —      |
| ENSG00000233002 | 5.13E-15 | -2.63127 | 1 | 1 AC005324.6    | —      |
| ENSG00000233003 | 5.13E-15 | -2.63127 | 1 | 1 CICP26        | K16941 |
| ENSG00000233005 | 5.13E-15 | -2.63127 | 1 | 1 AC067959.1    | —      |
| ENSG00000233007 | 5.13E-15 | -2.63127 | 1 | 1 AF241726.4    | K09273 |
| ENSG00000233008 | 5.13E-15 | -2.63127 | 1 | 1 RP11-475O6.1  | —      |
| ENSG00000233009 | 5.13E-15 | -2.63127 | 1 | 1 NALCN-AS1     | —      |
| ENSG00000233011 | 5.13E-15 | -2.63127 | 1 | 1 SLC9A3P1      | K12040 |
| ENSG00000233012 | 5.13E-15 | -2.63127 | 1 | 1 HDAC1P2       | K06067 |
| ENSG00000233013 | 5.13E-15 | -2.63127 | 1 | 1 FAM157B       | —      |
| ENSG00000233014 | 5.13E-15 | -2.63127 | 1 | 1 TBC1D3P7      | —      |
| ENSG00000233015 | 5.13E-15 | -2.63127 | 1 | 1 SLC25A6P1     | K05863 |
| ENSG00000233017 | 5.13E-15 | -2.63127 | 1 | 1 RP5-908M14.5  | —      |
| ENSG00000233020 | 5.13E-15 | -2.63127 | 1 | 1 RP11-42O15.2  | K16729 |
| ENSG00000233021 | 5.13E-15 | -2.63127 | 1 | 1 RP11-490E15.2 | —      |
| ENSG00000233022 | 5.13E-15 | -2.63127 | 1 | 1 RP11-118H15.1 | —      |
| ENSG00000233026 | 5.13E-15 | -2.63127 | 1 | 1 AC026166.2    | —      |
| ENSG00000233028 | 5.13E-15 | -2.63127 | 1 | 1 RP4-725G10.4  | K01166 |
| ENSG00000233029 | 5.13E-15 | -2.63127 | 1 | 1 RP11-439A17.9 | —      |
| ENSG00000233030 | 5.13E-15 | -2.63127 | 1 | 1 RP11-196G18.3 | —      |
| ENSG00000233031 | 5.13E-15 | -2.63127 | 1 | 1 AC125238.3    | K03948 |
| ENSG00000233033 | 5.13E-15 | -2.63127 | 1 | 1 CASK-AS1      | —      |
| ENSG00000233036 | 5.13E-15 | -2.63127 | 1 | 1 KRTAP8-2P     | —      |
| ENSG00000233037 | 5.13E-15 | -2.63127 | 1 | 1 AC009237.10   | K12019 |
| ENSG00000233038 | 5.13E-15 | -2.63127 | 1 | 1 AC011899.9    | —      |
| ENSG00000233039 | 5.13E-15 | -2.63127 | 1 | 1 MTND5P30      | K03883 |

|                 |          |          |   |                    |        |
|-----------------|----------|----------|---|--------------------|--------|
| ENSG00000233041 | 5.13E-15 | -2.63127 | 1 | 1 PHGR1            | -      |
| ENSG00000233044 | 5.13E-15 | -2.63127 | 1 | 1 RP1-137K2.2      | -      |
| ENSG00000233047 | 5.13E-15 | -2.63127 | 1 | 1 RP11-24P14.1     | -      |
| ENSG00000233048 | 5.13E-15 | -2.63127 | 1 | 1 RP5-1069C8.2     | -      |
| ENSG00000233050 | 5.13E-15 | -2.63127 | 1 | 1 DEFB130          | -      |
| ENSG00000233055 | 5.13E-15 | -2.63127 | 1 | 1 RP11-490D19.8    | K03948 |
| ENSG00000233057 | 5.13E-15 | -2.63127 | 1 | 1 EEF1A1P14        | K03231 |
| ENSG00000233060 | 5.13E-15 | -2.63127 | 1 | 1 AC016700.2       | -      |
| ENSG00000233061 | 5.13E-15 | -2.63127 | 1 | 1 TTLL7-IT1        | -      |
| ENSG00000233063 | 5.13E-15 | -2.63127 | 1 | 1 SAR1AP4          | K07953 |
| ENSG00000233064 | 5.13E-15 | -2.63127 | 1 | 1 RP3-380B8.4      | -      |
| ENSG00000233067 | 5.13E-15 | -2.63127 | 1 | 1 RP11-40F8.2      | -      |
| ENSG00000233069 | 5.13E-15 | -2.63127 | 1 | 1 RP5-930J4.2      | -      |
| ENSG00000233070 | 5.13E-15 | -2.63127 | 1 | 1 ZFY-AS1          | -      |
| ENSG00000233071 | 5.13E-15 | -2.63127 | 1 | 1 RP4-635G19.1     | K02998 |
| ENSG00000233073 | 5.13E-15 | -2.63127 | 1 | 1 AC005009.2       | -      |
| ENSG00000233074 | 5.13E-15 | -2.63127 | 1 | 1 RP11-327I22.6    | -      |
| ENSG00000233075 | 5.13E-15 | -2.63127 | 1 | 1 AL023583.1       | K12606 |
| ENSG00000233078 | 5.13E-15 | -2.63127 | 1 | 1 RP11-5P18.5      | -      |
| ENSG00000233079 | 5.13E-15 | -2.63127 | 1 | 1 RP11-90C4.3      | -      |
| ENSG00000233080 | 5.13E-15 | -2.63127 | 1 | 1 CTA-714B7.5      | -      |
| ENSG00000233082 | 5.13E-15 | -2.63127 | 1 | 1 AC073094.4       | -      |
| ENSG00000233083 | 5.13E-15 | -2.63127 | 1 | 1 FTH1P6           | -      |
| ENSG00000233084 | 5.13E-15 | -2.63127 | 1 | 1 AL672183.2       | K02893 |
| ENSG00000233085 | 5.13E-15 | -2.63127 | 1 | 1 XXYac-YX65C7_A.1 | -      |
| ENSG00000233086 | 5.13E-15 | -2.63127 | 1 | 1 RP11-375O18.2    | -      |
| ENSG00000233090 | 5.13E-15 | -2.63127 | 1 | 1 AC015922.7       | K17287 |
| ENSG00000233093 | 5.13E-15 | -2.63127 | 1 | 1 LINC00892        | -      |
| ENSG00000233099 | 5.13E-15 | -2.63127 | 1 | 1 RP11-375A5.1     | -      |
| ENSG00000233103 | 5.13E-15 | -2.63127 | 1 | 1 RP11-524P6.1     | -      |
| ENSG00000233105 | 5.13E-15 | -2.63127 | 1 | 1 AC103563.4       | K06856 |
| ENSG00000233106 | 5.13E-15 | -2.63127 | 1 | 1 RPL12P3          | -      |
| ENSG00000233107 | 5.13E-15 | -2.63127 | 1 | 1 SUCLA2P2         | K01900 |
| ENSG00000233109 | 5.13E-15 | -2.63127 | 1 | 1 RP11-22C8.1      | -      |
| ENSG00000233111 | 5.13E-15 | -2.63127 | 1 | 1 RAB1C            | K07875 |
| ENSG00000233114 | 5.13E-15 | -2.63127 | 1 | 1 RP4-533D7.3      | K02271 |
| ENSG00000233115 | 5.13E-15 | -2.63127 | 1 | 1 FAM90A11P        | -      |
| ENSG00000233118 | 5.13E-15 | -2.63127 | 1 | 1 UBE2V1P8         | K10704 |
| ENSG00000233120 | 5.13E-15 | -2.63127 | 1 | 1 USP9YP15         | -      |
| ENSG00000233121 | 5.13E-15 | -2.63127 | 1 | 1 VN1R20P          | K04614 |
| ENSG00000233123 | 5.13E-15 | -2.63127 | 1 | 1 LINC01007        | -      |
| ENSG00000233124 | 5.13E-15 | -2.63127 | 1 | 1 LINC00456        | -      |
| ENSG00000233126 | 5.13E-15 | -2.63127 | 1 | 1 ZNF736P3Y        | K09228 |
| ENSG00000233128 | 5.13E-15 | -2.63127 | 1 | 1 AC007317.1       | -      |
| ENSG00000233129 | 5.13E-15 | -2.63127 | 1 | 1 RP5-837O21.2     | -      |
| ENSG00000233131 | 5.13E-15 | -2.63127 | 1 | 1 AC096649.1       | K02957 |
| ENSG00000233132 | 5.13E-15 | -2.63127 | 1 | 1 FAM90A3P         | -      |
| ENSG00000233133 | 5.13E-15 | -2.63127 | 1 | 1 AC104451.2       | K08776 |
| ENSG00000233134 | 5.13E-15 | -2.63127 | 1 | 1 AC009960.7       | -      |
| ENSG00000233135 | 5.13E-15 | -2.63127 | 1 | 1 RPS27P18         | -      |
| ENSG00000233136 | 5.13E-15 | -2.63127 | 1 | 1 USP17L11         | K11845 |
| ENSG00000233138 | 5.13E-15 | -2.63127 | 1 | 1 RP1-67K17.3      | -      |
| ENSG00000233139 | 5.13E-15 | -2.63127 | 1 | 1 RP11-38O23.4     | K00819 |
| ENSG00000233143 | 5.13E-15 | -2.63127 | 1 | 1 AC009492.1       | -      |
| ENSG00000233144 | 5.13E-15 | -2.63127 | 1 | 1 RP11-537A6.9     | -      |
| ENSG00000233145 | 5.13E-15 | -2.63127 | 1 | 1 RP11-364B14.1    | -      |
| ENSG00000233146 | 5.13E-15 | -2.63127 | 1 | 1 BPIFB5P          | -      |
| ENSG00000233147 | 5.13E-15 | -2.63127 | 1 | 1 RP11-90C4.1      | -      |

|                 |          |          |   |                 |        |
|-----------------|----------|----------|---|-----------------|--------|
| ENSG00000233148 | 5.13E-15 | -2.63127 | 1 | 1 SYF2P2        | -      |
| ENSG00000233153 | 5.13E-15 | -2.63127 | 1 | 1 UBE2E2-AS1    | -      |
| ENSG00000233154 | 5.13E-15 | -2.63127 | 1 | 1 RP4-655J12.4  | -      |
| ENSG00000233155 | 5.13E-15 | -2.63127 | 1 | 1 HMGA1P8       | K09282 |
| ENSG00000233156 | 5.13E-15 | -2.63127 | 1 | 1 HSFY8P        | -      |
| ENSG00000233157 | 5.13E-15 | -2.63127 | 1 | 1 RP3-388M5.8   | -      |
| ENSG00000233158 | 5.13E-15 | -2.63127 | 1 | 1 RPS24P6       | K02974 |
| ENSG00000233159 | 5.13E-15 | -2.63127 | 1 | 1 AC007390.4    | K02910 |
| ENSG00000233162 | 5.13E-15 | -2.63127 | 1 | 1 MORF4L1P6     | K11339 |
| ENSG00000233163 | 5.13E-15 | -2.63127 | 1 | 1 RP11-259F16.3 | K02951 |
| ENSG00000233167 | 5.13E-15 | -2.63127 | 1 | 1 EEF1A1P26     | K03231 |
| ENSG00000233171 | 5.13E-15 | -2.63127 | 1 | 1 RP11-459O16.3 | K09228 |
| ENSG00000233172 | 5.13E-15 | -2.63127 | 1 | 1 RP11-12A20.6  | -      |
| ENSG00000233173 | 5.13E-15 | -2.63127 | 1 | 1 VN1R34P       | K04614 |
| ENSG00000233176 | 5.13E-15 | -2.63127 | 1 | 1 OR7E157P      | K04257 |
| ENSG00000233178 | 5.13E-15 | -2.63127 | 1 | 1 RP11-88I18.2  | -      |
| ENSG00000233179 | 5.13E-15 | -2.63127 | 1 | 1 RP11-536P6.3  | -      |
| ENSG00000233183 | 5.13E-15 | -2.63127 | 1 | 1 RP3-468B3.2   | -      |
| ENSG00000233189 | 5.13E-15 | -2.63127 | 1 | 1 RPL12P29      | K02870 |
| ENSG00000233190 | 5.13E-15 | -2.63127 | 1 | 1 RPS24P13      | K02974 |
| ENSG00000233191 | 5.13E-15 | -2.63127 | 1 | 1 AC006372.6    | -      |
| ENSG00000233193 | 5.13E-15 | -2.63127 | 1 | 1 AC005324.7    | -      |
| ENSG00000233196 | 5.13E-15 | -2.63127 | 1 | 1 GS1-304P7.1   | -      |
| ENSG00000233197 | 5.13E-15 | -2.63127 | 1 | 1 TMEM256P1     | -      |
| ENSG00000233200 | 5.13E-15 | -2.63127 | 1 | 1 RP11-324I22.2 | -      |
| ENSG00000233204 | 5.13E-15 | -2.63127 | 1 | 1 MAPRE1P3      | -      |
| ENSG00000233206 | 5.13E-15 | -2.63127 | 1 | 1 RPS3AP1       | K02984 |
| ENSG00000233207 | 5.13E-15 | -2.63127 | 1 | 1 RP11-216M21.7 | -      |
| ENSG00000233208 | 5.13E-15 | -2.63127 | 1 | 1 LINC00642     | -      |
| ENSG00000233211 | 5.13E-15 | -2.63127 | 1 | 1 GRPEL2P1      | K03687 |
| ENSG00000233213 | 5.13E-15 | -2.63127 | 1 | 1 KCNJ6-IT1     | -      |
| ENSG00000233214 | 5.13E-15 | -2.63127 | 1 | 1 AC002511.2    | -      |
| ENSG00000233215 | 5.13E-15 | -2.63127 | 1 | 1 AP000472.2    | -      |
| ENSG00000233216 | 5.13E-15 | -2.63127 | 1 | 1 RP11-414C16.1 | K05357 |
| ENSG00000233217 | 5.13E-15 | -2.63127 | 1 | 1 MROH3P        | -      |
| ENSG00000233218 | 5.13E-15 | -2.63127 | 1 | 1 SNX18P16      | K17299 |
| ENSG00000233222 | 5.13E-15 | -2.63127 | 1 | 1 RP11-216N14.9 | -      |
| ENSG00000233228 | 5.13E-15 | -2.63127 | 1 | 1 LPCAT2BP      | K13510 |
| ENSG00000233229 | 5.13E-15 | -2.63127 | 1 | 1 CNOT7P1       | K12581 |
| ENSG00000233234 | 5.13E-15 | -2.63127 | 1 | 1 RP11-740P5.2  | -      |
| ENSG00000233235 | 5.13E-15 | -2.63127 | 1 | 1 RP5-908D6.1   | -      |
| ENSG00000233236 | 5.13E-15 | -2.63127 | 1 | 1 AP001171.1    | -      |
| ENSG00000233238 | 5.13E-15 | -2.63127 | 1 | 1 DEFA9P        | -      |
| ENSG00000233243 | 5.13E-15 | -2.63127 | 1 | 1 RP11-12D5.5   | K05357 |
| ENSG00000233244 | 5.13E-15 | -2.63127 | 1 | 1 CYP4F59P      | -      |
| ENSG00000233248 | 5.13E-15 | -2.63127 | 1 | 1 MTND6P9       | -      |
| ENSG00000233251 | 5.13E-15 | -2.63127 | 1 | 1 AC007743.1    | -      |
| ENSG00000233252 | 5.13E-15 | -2.63127 | 1 | 1 CRIP1P1       | -      |
| ENSG00000233254 | 5.13E-15 | -2.63127 | 1 | 1 RPL21P134     | K02889 |
| ENSG00000233255 | 5.13E-15 | -2.63127 | 1 | 1 AC019181.2    | -      |
| ENSG00000233256 | 5.13E-15 | -2.63127 | 1 | 1 RP11-445K13.2 | -      |
| ENSG00000233258 | 5.13E-15 | -2.63127 | 1 | 1 RP11-219F10.1 | -      |
| ENSG00000233259 | 5.13E-15 | -2.63127 | 1 | 1 FABP3P2       | K08752 |
| ENSG00000233260 | 5.13E-15 | -2.63127 | 1 | 1 RPSAP63       | K02998 |
| ENSG00000233261 | 5.13E-15 | -2.63127 | 1 | 1 LINC00264     | -      |
| ENSG00000233262 | 5.13E-15 | -2.63127 | 1 | 1 RP11-380F14.2 | -      |
| ENSG00000233263 | 5.13E-15 | -2.63127 | 1 | 1 AC009518.2    | K10364 |
| ENSG00000233265 | 5.13E-15 | -2.63127 | 1 | 1 MICF          | K07985 |

|                 |          |          |   |                 |        |
|-----------------|----------|----------|---|-----------------|--------|
| ENSG00000233268 | 5.13E-15 | -2.63127 | 1 | 1 RP11-558F24.2 | -      |
| ENSG00000233271 | 5.13E-15 | -2.63127 | 1 | 1 RP11-12C17.2  | -      |
| ENSG00000233272 | 5.13E-15 | -2.63127 | 1 | 1 PNPT1P2       | -      |
| ENSG00000233273 | 5.13E-15 | -2.63127 | 1 | 1 AMMECR1LP1    | -      |
| ENSG00000233275 | 5.13E-15 | -2.63127 | 1 | 1 AC009238.8    | -      |
| ENSG00000233277 | 5.13E-15 | -2.63127 | 1 | 1 RP5-1030M6.3  | -      |
| ENSG00000233278 | 5.13E-15 | -2.63127 | 1 | 1 RPS26P2       | K02976 |
| ENSG00000233285 | 5.13E-15 | -2.63127 | 1 | 1 AC073869.13   | -      |
| ENSG00000233286 | 5.13E-15 | -2.63127 | 1 | 1 MTND3P10      | K03880 |
| ENSG00000233287 | 5.13E-15 | -2.63127 | 1 | 1 AC009362.2    | K02901 |
| ENSG00000233288 | 5.13E-15 | -2.63127 | 1 | 1 RP11-760D2.5  | -      |
| ENSG00000233290 | 5.13E-15 | -2.63127 | 1 | 1 RP11-147G16.1 | -      |
| ENSG00000233291 | 5.13E-15 | -2.63127 | 1 | 1 RPL7AP61      | K02936 |
| ENSG00000233292 | 5.13E-15 | -2.63127 | 1 | 1 RP11-341B24.3 | K13203 |
| ENSG00000233293 | 5.13E-15 | -2.63127 | 1 | 1 RP11-410N8.3  | -      |
| ENSG00000233295 | 5.13E-15 | -2.63127 | 1 | 1 FAM90A20P     | -      |
| ENSG00000233296 | 5.13E-15 | -2.63127 | 1 | 1 AC092159.2    | -      |
| ENSG00000233299 | 5.13E-15 | -2.63127 | 1 | 1 HIGD1AP4      | -      |
| ENSG00000233300 | 5.13E-15 | -2.63127 | 1 | 1 EIF4A1P1      | K03257 |
| ENSG00000233301 | 5.13E-15 | -2.63127 | 1 | 1 OR4C14P       | K04257 |
| ENSG00000233303 | 5.13E-15 | -2.63127 | 1 | 1 XXYLT1-AS1    | -      |
| ENSG00000233304 | 5.13E-15 | -2.63127 | 1 | 1 RP13-614K11.1 | -      |
| ENSG00000233306 | 5.13E-15 | -2.63127 | 1 | 1 TRGV2         | -      |
| ENSG00000233307 | 5.13E-15 | -2.63127 | 1 | 1 AC109815.2    | K12892 |
| ENSG00000233308 | 5.13E-15 | -2.63127 | 1 | 1 OSTN-AS1      | -      |
| ENSG00000233309 | 5.13E-15 | -2.63127 | 1 | 1 RPS6P12       | -      |
| ENSG00000233311 | 5.13E-15 | -2.63127 | 1 | 1 AC009960.3    | K02256 |
| ENSG00000233313 | 5.13E-15 | -2.63127 | 1 | 1 HMGA1P5       | K09282 |
| ENSG00000233316 | 5.13E-15 | -2.63127 | 1 | 1 DSCR10        | -      |
| ENSG00000233318 | 5.13E-15 | -2.63127 | 1 | 1 RP11-573G6.2  | K02910 |
| ENSG00000233320 | 5.13E-15 | -2.63127 | 1 | 1 H2BFXP        | K11252 |
| ENSG00000233321 | 5.13E-15 | -2.63127 | 1 | 1 RP11-482E14.1 | -      |
| ENSG00000233324 | 5.13E-15 | -2.63127 | 1 | 1 EEF1A1P34     | K03231 |
| ENSG00000233329 | 5.13E-15 | -2.63127 | 1 | 1 AC068287.1    | K02960 |
| ENSG00000233333 | 5.13E-15 | -2.63127 | 1 | 1 RNFT1P2       | -      |
| ENSG00000233335 | 5.13E-15 | -2.63127 | 1 | 1 AC016696.1    | -      |
| ENSG00000233336 | 5.13E-15 | -2.63127 | 1 | 1 RP13-221M14.2 | -      |
| ENSG00000233338 | 5.13E-15 | -2.63127 | 1 | 1 TLR8-AS1      | -      |
| ENSG00000233339 | 5.13E-15 | -2.63127 | 1 | 1 AC018878.3    | -      |
| ENSG00000233340 | 5.13E-15 | -2.63127 | 1 | 1 RP11-25C19.3  | -      |
| ENSG00000233342 | 5.13E-15 | -2.63127 | 1 | 1 RP11-235G24.3 | -      |
| ENSG00000233349 | 5.13E-15 | -2.63127 | 1 | 1 LINC00333     | -      |
| ENSG00000233351 | 5.13E-15 | -2.63127 | 1 | 1 RP1-69D17.3   | -      |
| ENSG00000233352 | 5.13E-15 | -2.63127 | 1 | 1 RP1-300I2.3   | -      |
| ENSG00000233353 | 5.13E-15 | -2.63127 | 1 | 1 RPS7P9        | K02993 |
| ENSG00000233354 | 5.13E-15 | -2.63127 | 1 | 1 LINC00028     | -      |
| ENSG00000233355 | 5.13E-15 | -2.63127 | 1 | 1 CHRM3-AS2     | -      |
| ENSG00000233357 | 5.13E-15 | -2.63127 | 1 | 1 RPL30P15      | K02908 |
| ENSG00000233358 | 5.13E-15 | -2.63127 | 1 | 1 RP1-209A6.1   | -      |
| ENSG00000233359 | 5.13E-15 | -2.63127 | 1 | 1 RP11-202K23.1 | -      |
| ENSG00000233363 | 5.13E-15 | -2.63127 | 1 | 1 AC006019.4    | -      |
| ENSG00000233365 | 5.13E-15 | -2.63127 | 1 | 1 RP4-655C5.4   | -      |
| ENSG00000233366 | 5.13E-15 | -2.63127 | 1 | 1 ZNF90P2       | K09228 |
| ENSG00000233368 | 5.13E-15 | -2.63127 | 1 | 1 RP11-277L2.3  | -      |
| ENSG00000233370 | 5.13E-15 | -2.63127 | 1 | 1 AC092664.1    | K16575 |
| ENSG00000233372 | 5.13E-15 | -2.63127 | 1 | 1 RP5-893G23.1  | -      |
| ENSG00000233373 | 5.13E-15 | -2.63127 | 1 | 1 AC106874.3    | -      |
| ENSG00000233376 | 5.13E-15 | -2.63127 | 1 | 1 RP5-881L22.6  | -      |

|                 |          |          |   |                   |        |
|-----------------|----------|----------|---|-------------------|--------|
| ENSG00000233377 | 5.13E-15 | -2.63127 | 1 | 1 MTND4P20        | -      |
| ENSG00000233378 | 5.13E-15 | -2.63127 | 1 | 1 USP9YP34        | K11840 |
| ENSG00000233379 | 5.13E-15 | -2.63127 | 1 | 1 RP11-318G21.4   | -      |
| ENSG00000233380 | 5.13E-15 | -2.63127 | 1 | 1 RPS2P48         | K02981 |
| ENSG00000233383 | 5.13E-15 | -2.63127 | 1 | 1 RP11-324F21.1   | -      |
| ENSG00000233384 | 5.13E-15 | -2.63127 | 1 | 1 RP11-100E13.1   | -      |
| ENSG00000233385 | 5.13E-15 | -2.63127 | 1 | 1 RP11-3N2.9      | -      |
| ENSG00000233387 | 5.13E-15 | -2.63127 | 1 | 1 RP11-342D11.3   | -      |
| ENSG00000233388 | 5.13E-15 | -2.63127 | 1 | 1 RP4-569D19.5    | K15430 |
| ENSG00000233393 | 5.13E-15 | -2.63127 | 1 | 1 AP000688.29     | -      |
| ENSG00000233394 | 5.13E-15 | -2.63127 | 1 | 1 RP11-248D7.2    | -      |
| ENSG00000233395 | 5.13E-15 | -2.63127 | 1 | 1 LINC00841       | -      |
| ENSG00000233397 | 5.13E-15 | -2.63127 | 1 | 1 AC008063.3      | -      |
| ENSG00000233399 | 5.13E-15 | -2.63127 | 1 | 1 RP11-111I12.1   | -      |
| ENSG00000233402 | 5.13E-15 | -2.63127 | 1 | 1 TARDBPP1        | -      |
| ENSG00000233403 | 5.13E-15 | -2.63127 | 1 | 1 RP11-86A5.1     | -      |
| ENSG00000233405 | 5.13E-15 | -2.63127 | 1 | 1 LINC01046       | -      |
| ENSG00000233407 | 5.13E-15 | -2.63127 | 1 | 1 RP11-567C20.3   | -      |
| ENSG00000233408 | 5.13E-15 | -2.63127 | 1 | 1 LA16c-23H5.4    | -      |
| ENSG00000233409 | 5.13E-15 | -2.63127 | 1 | 1 FANK1-AS1       | -      |
| ENSG00000233410 | 5.13E-15 | -2.63127 | 1 | 1 RP11-16L9.3     | -      |
| ENSG00000233411 | 5.13E-15 | -2.63127 | 1 | 1 RP11-104L21.2   | -      |
| ENSG00000233412 | 5.13E-15 | -2.63127 | 1 | 1 OR5H15          | K04257 |
| ENSG00000233414 | 5.13E-15 | -2.63127 | 1 | 1 CNN2P5          | -      |
| ENSG00000233415 | 5.13E-15 | -2.63127 | 1 | 1 RP11-101E14.3   | -      |
| ENSG00000233416 | 5.13E-15 | -2.63127 | 1 | 1 AC012065.5      | -      |
| ENSG00000233417 | 5.13E-15 | -2.63127 | 1 | 1 RP4-742N3.1     | -      |
| ENSG00000233419 | 5.13E-15 | -2.63127 | 1 | 1 RP4-781L3.1     | K06566 |
| ENSG00000233420 | 5.13E-15 | -2.63127 | 1 | 1 AC002127.4      | -      |
| ENSG00000233421 | 5.13E-15 | -2.63127 | 1 | 1 U1              | -      |
| ENSG00000233423 | 5.13E-15 | -2.63127 | 1 | 1 RP4-736H5.3     | -      |
| ENSG00000233424 | 5.13E-15 | -2.63127 | 1 | 1 RP11-175I6.5    | -      |
| ENSG00000233425 | 5.13E-15 | -2.63127 | 1 | 1 KRT18P67        | K07604 |
| ENSG00000233427 | 5.13E-15 | -2.63127 | 1 | 1 RP1-212P9.3     | -      |
| ENSG00000233428 | 5.13E-15 | -2.63127 | 1 | 1 AC019050.1      | K03767 |
| ENSG00000233430 | 5.13E-15 | -2.63127 | 1 | 1 RP11-403I13.9   | -      |
| ENSG00000233432 | 5.13E-15 | -2.63127 | 1 | 1 RP11-344P13.3   | K02519 |
| ENSG00000233433 | 5.13E-15 | -2.63127 | 1 | 1 RP1-296G17.3    | K17985 |
| ENSG00000233434 | 5.13E-15 | -2.63127 | 1 | 1 BX649567.1      | -      |
| ENSG00000233435 | 5.13E-15 | -2.63127 | 1 | 1 AGGF1P2         | -      |
| ENSG00000233437 | 5.13E-15 | -2.63127 | 1 | 1 RP13-580B18.1   | K00871 |
| ENSG00000233438 | 5.13E-15 | -2.63127 | 1 | 1 AC109829.1      | -      |
| ENSG00000233440 | 5.13E-15 | -2.63127 | 1 | 1 HMGA1P6         | K09282 |
| ENSG00000233441 | 5.13E-15 | -2.63127 | 1 | 1 CYP2AB1P        | K17857 |
| ENSG00000233442 | 5.13E-15 | -2.63127 | 1 | 1 PPP6R2P1        | K15500 |
| ENSG00000233444 | 5.13E-15 | -2.63127 | 1 | 1 AC013262.1      | K02261 |
| ENSG00000233445 | 5.13E-15 | -2.63127 | 1 | 1 RPL17P11        | K02880 |
| ENSG00000233446 | 5.13E-15 | -2.63127 | 1 | 1 XXyac-YR12DB5.1 | -      |
| ENSG00000233447 | 5.13E-15 | -2.63127 | 1 | 1 AC103563.6      | -      |
| ENSG00000233448 | 5.13E-15 | -2.63127 | 1 | 1 PMS2P9          | K10858 |
| ENSG00000233449 | 5.13E-15 | -2.63127 | 1 | 1 RP11-233E12.4   | -      |
| ENSG00000233451 | 5.13E-15 | -2.63127 | 1 | 1 RP11-301N24.3   | -      |
| ENSG00000233454 | 5.13E-15 | -2.63127 | 1 | 1 RP11-196D18.2   | K01079 |
| ENSG00000233456 | 5.13E-15 | -2.63127 | 1 | 1 LINC01077       | -      |
| ENSG00000233457 | 5.13E-15 | -2.63127 | 1 | 1 RP11-336N8.1    | -      |
| ENSG00000233459 | 5.13E-15 | -2.63127 | 1 | 1 AC125238.2      | -      |
| ENSG00000233460 | 5.13E-15 | -2.63127 | 1 | 1 RPL35AP31       | K02917 |
| ENSG00000233464 | 5.13E-15 | -2.63127 | 1 | 1 RP11-133I21.2   | -      |



|                 |          |          |   |                 |        |
|-----------------|----------|----------|---|-----------------|--------|
| ENSG00000233467 | 5.13E-15 | -2.63127 | 1 | 1 U40455.1      | K16220 |
| ENSG00000233470 | 5.13E-15 | -2.63127 | 1 | 1 RP11-524K22.1 | -      |
| ENSG00000233471 | 5.13E-15 | -2.63127 | 1 | 1 KRT18P62      | K07604 |
| ENSG00000233472 | 5.13E-15 | -2.63127 | 1 | 1 RP11-218D6.4  | -      |
| ENSG00000233473 | 5.13E-15 | -2.63127 | 1 | 1 RAD1P2        | K02830 |
| ENSG00000233477 | 5.13E-15 | -2.63127 | 1 | 1 RP11-45P22.2  | K03767 |
| ENSG00000233479 | 5.13E-15 | -2.63127 | 1 | 1 AC017074.1    | -      |
| ENSG00000233480 | 5.13E-15 | -2.63127 | 1 | 1 AP000946.2    | -      |
| ENSG00000233482 | 5.13E-15 | -2.63127 | 1 | 1 RP11-78O9.1   | -      |
| ENSG00000233484 | 5.13E-15 | -2.63127 | 1 | 1 RP11-74B21.1  | K00412 |
| ENSG00000233485 | 5.13E-15 | -2.63127 | 1 | 1 RP3-467K16.2  | -      |
| ENSG00000233487 | 5.13E-15 | -2.63127 | 1 | 1 AC011322.1    | K02998 |
| ENSG00000233489 | 5.13E-15 | -2.63127 | 1 | 1 AC091652.2    | K13211 |
| ENSG00000233492 | 5.13E-15 | -2.63127 | 1 | 1 RP5-984P4.4   | -      |
| ENSG00000233494 | 5.13E-15 | -2.63127 | 1 | 1 AC009963.3    | K01315 |
| ENSG00000233496 | 5.13E-15 | -2.63127 | 1 | 1 SYNJ2-IT1     | -      |
| ENSG00000233497 | 5.13E-15 | -2.63127 | 1 | 1 HNRNPA1P60    | K12741 |
| ENSG00000233499 | 5.13E-15 | -2.63127 | 1 | 1 OR5B1P        | K04257 |
| ENSG00000233501 | 5.13E-15 | -2.63127 | 1 | 1 SRGAP2-AS1    | -      |
| ENSG00000233502 | 5.13E-15 | -2.63127 | 1 | 1 AC104794.4    | -      |
| ENSG00000233503 | 5.13E-15 | -2.63127 | 1 | 1 HNRNPLP1      | K13159 |
| ENSG00000233508 | 5.13E-15 | -2.63127 | 1 | 1 RP1-269M15.3  | -      |
| ENSG00000233511 | 5.13E-15 | -2.63127 | 1 | 1 RP1-128O3.5   | -      |
| ENSG00000233515 | 5.13E-15 | -2.63127 | 1 | 1 AL022344.4    | -      |
| ENSG00000233516 | 5.13E-15 | -2.63127 | 1 | 1 RP11-388N2.1  | -      |
| ENSG00000233517 | 5.13E-15 | -2.63127 | 1 | 1 AC005162.5    | -      |
| ENSG00000233519 | 5.13E-15 | -2.63127 | 1 | 1 RP11-177F11.1 | -      |
| ENSG00000233522 | 5.13E-15 | -2.63127 | 1 | 1 FAM224A       | -      |
| ENSG00000233523 | 5.13E-15 | -2.63127 | 1 | 1 PHBP5         | -      |
| ENSG00000233524 | 5.13E-15 | -2.63127 | 1 | 1 RANP8         | K07936 |
| ENSG00000233526 | 5.13E-15 | -2.63127 | 1 | 1 RP11-490H9.1  | -      |
| ENSG00000233528 | 5.13E-15 | -2.63127 | 1 | 1 LINC00430     | -      |
| ENSG00000233529 | 5.13E-15 | -2.63127 | 1 | 1 HCG21         | -      |
| ENSG00000233531 | 5.13E-15 | -2.63127 | 1 | 1 DEFA10P       | K05230 |
| ENSG00000233532 | 5.13E-15 | -2.63127 | 1 | 1 LINC00460     | -      |
| ENSG00000233533 | 5.13E-15 | -2.63127 | 1 | 1 MKNK2P1       | K04372 |
| ENSG00000233534 | 5.13E-15 | -2.63127 | 1 | 1 RP1-38C16.2   | -      |
| ENSG00000233535 | 5.13E-15 | -2.63127 | 1 | 1 RP1-122K4.2   | -      |
| ENSG00000233536 | 5.13E-15 | -2.63127 | 1 | 1 RP11-867G2.5  | -      |
| ENSG00000233537 | 5.13E-15 | -2.63127 | 1 | 1 TEDDM1P1      | -      |
| ENSG00000233539 | 5.13E-15 | -2.63127 | 1 | 1 AC011294.3    | K00757 |
| ENSG00000233540 | 5.13E-15 | -2.63127 | 1 | 1 DN3-IT1       | -      |
| ENSG00000233541 | 5.13E-15 | -2.63127 | 1 | 1 RPL31P47      | K02910 |
| ENSG00000233542 | 5.13E-15 | -2.63127 | 1 | 1 RP11-547D24.1 | -      |
| ENSG00000233543 | 5.13E-15 | -2.63127 | 1 | 1 CHTF8P1       | -      |
| ENSG00000233544 | 5.13E-15 | -2.63127 | 1 | 1 EIF3KP2       | K15028 |
| ENSG00000233545 | 5.13E-15 | -2.63127 | 1 | 1 CYCSP33       | K08738 |
| ENSG00000233546 | 5.13E-15 | -2.63127 | 1 | 1 PRYP5         | -      |
| ENSG00000233548 | 5.13E-15 | -2.63127 | 1 | 1 CYCSP44       | K08738 |
| ENSG00000233549 | 5.13E-15 | -2.63127 | 1 | 1 CYCSP35       | K08738 |
| ENSG00000233550 | 5.13E-15 | -2.63127 | 1 | 1 AC068137.11   | -      |
| ENSG00000233551 | 5.13E-15 | -2.63127 | 1 | 1 RP11-335H2.2  | K12620 |
| ENSG00000233553 | 5.13E-15 | -2.63127 | 1 | 1 AC108462.1    | -      |
| ENSG00000233555 | 5.13E-15 | -2.63127 | 1 | 1 RP11-452D2.1  | K02936 |
| ENSG00000233557 | 5.13E-15 | -2.63127 | 1 | 1 NFU1P2        | -      |
| ENSG00000233559 | 5.13E-15 | -2.63127 | 1 | 1 AC016831.7    | -      |
| ENSG00000233562 | 5.13E-15 | -2.63127 | 1 | 1 RP11-548N1.1  | K02984 |
| ENSG00000233563 | 5.13E-15 | -2.63127 | 1 | 1 OR52E7P       | K04257 |

|                 |          |          |   |                  |        |
|-----------------|----------|----------|---|------------------|--------|
| ENSG00000233565 | 5.13E-15 | -2.63127 | 1 | 1 RP11-42D20.1   | K02905 |
| ENSG00000233569 | 5.13E-15 | -2.63127 | 1 | 1 RP11-500B12.1  | —      |
| ENSG00000233570 | 5.13E-15 | -2.63127 | 1 | 1 LINC00690      | —      |
| ENSG00000233571 | 5.13E-15 | -2.63127 | 1 | 1 RP11-545D19.1  | —      |
| ENSG00000233574 | 5.13E-15 | -2.63127 | 1 | 1 CTA-929C8.5    | —      |
| ENSG00000233575 | 5.13E-15 | -2.63127 | 1 | 1 RP11-459D20.1  | K03123 |
| ENSG00000233576 | 5.13E-15 | -2.63127 | 1 | 1 RP11-778D9.9   | K04819 |
| ENSG00000233577 | 5.13E-15 | -2.63127 | 1 | 1 RP3-462D8.2    | —      |
| ENSG00000233579 | 5.13E-15 | -2.63127 | 1 | 1 KRT8P15        | K07605 |
| ENSG00000233581 | 5.13E-15 | -2.63127 | 1 | 1 AC069155.1     | —      |
| ENSG00000233583 | 5.13E-15 | -2.63127 | 1 | 1 RP4-635A23.3   | —      |
| ENSG00000233585 | 5.13E-15 | -2.63127 | 1 | 1 AC115617.2     | K07508 |
| ENSG00000233586 | 5.13E-15 | -2.63127 | 1 | 1 RP11-763B22.3  | —      |
| ENSG00000233587 | 5.13E-15 | -2.63127 | 1 | 1 AC096570.1     | —      |
| ENSG00000233594 | 5.13E-15 | -2.63127 | 1 | 1 BTF3P5         | K01527 |
| ENSG00000233595 | 5.13E-15 | -2.63127 | 1 | 1 MTND2P29       | K03879 |
| ENSG00000233597 | 5.13E-15 | -2.63127 | 1 | 1 RP11-343B5.1   | K02885 |
| ENSG00000233603 | 5.13E-15 | -2.63127 | 1 | 1 JTBP1          | —      |
| ENSG00000233605 | 5.13E-15 | -2.63127 | 1 | 1 AC073628.1     | —      |
| ENSG00000233606 | 5.13E-15 | -2.63127 | 1 | 1 OR6C66P        | K04257 |
| ENSG00000233607 | 5.13E-15 | -2.63127 | 1 | 1 AC068610.5     | —      |
| ENSG00000233609 | 5.13E-15 | -2.63127 | 1 | 1 RP11-62H7.2    | —      |
| ENSG00000233610 | 5.13E-15 | -2.63127 | 1 | 1 LINC00462      | —      |
| ENSG00000233615 | 5.13E-15 | -2.63127 | 1 | 1 HNRNPA1P42     | K12741 |
| ENSG00000233616 | 5.13E-15 | -2.63127 | 1 | 1 RP11-542K23.10 | —      |
| ENSG00000233619 | 5.13E-15 | -2.63127 | 1 | 1 AC006328.9     | —      |
| ENSG00000233620 | 5.13E-15 | -2.63127 | 1 | 1 RP11-22M7.2    | —      |
| ENSG00000233625 | 5.13E-15 | -2.63127 | 1 | 1 RP5-905G11.3   | —      |
| ENSG00000233627 | 5.13E-15 | -2.63127 | 1 | 1 C4A-AS1        | —      |
| ENSG00000233628 | 5.13E-15 | -2.63127 | 1 | 1 VN2R5P         | —      |
| ENSG00000233630 | 5.13E-15 | -2.63127 | 1 | 1 FAM138F        | —      |
| ENSG00000233632 | 5.13E-15 | -2.63127 | 1 | 1 RP1-302D9.5    | —      |
| ENSG00000233633 | 5.13E-15 | -2.63127 | 1 | 1 AC093326.3     | —      |
| ENSG00000233634 | 5.13E-15 | -2.63127 | 1 | 1 GOT2P5         | K14455 |
| ENSG00000233639 | 5.13E-15 | -2.63127 | 1 | 1 LINC01158      | —      |
| ENSG00000233640 | 5.13E-15 | -2.63127 | 1 | 1 KRTAP13-5P     | —      |
| ENSG00000233642 | 5.13E-15 | -2.63127 | 1 | 1 GPR158-AS1     | —      |
| ENSG00000233643 | 5.13E-15 | -2.63127 | 1 | 1 RP11-491H19.1  | —      |
| ENSG00000233644 | 5.13E-15 | -2.63127 | 1 | 1 ARHGEF7-IT1    | —      |
| ENSG00000233645 | 5.13E-15 | -2.63127 | 1 | 1 RP11-431K24.4  | —      |
| ENSG00000233646 | 5.13E-15 | -2.63127 | 1 | 1 OR52T1P        | K04257 |
| ENSG00000233648 | 5.13E-15 | -2.63127 | 1 | 1 AC010095.6     | K02271 |
| ENSG00000233651 | 5.13E-15 | -2.63127 | 1 | 1 RP11-111F5.8   | —      |
| ENSG00000233652 | 5.13E-15 | -2.63127 | 1 | 1 CICIP1         | K16941 |
| ENSG00000233653 | 5.13E-15 | -2.63127 | 1 | 1 CICIP7         | K16941 |
| ENSG00000233655 | 5.13E-15 | -2.63127 | 1 | 1 IGHD4-4        | —      |
| ENSG00000233656 | 5.13E-15 | -2.63127 | 1 | 1 RP11-716O23.1  | —      |
| ENSG00000233659 | 5.13E-15 | -2.63127 | 1 | 1 NDUFA5P4       | K03949 |
| ENSG00000233661 | 5.13E-15 | -2.63127 | 1 | 1 SPIN4-AS1      | —      |
| ENSG00000233662 | 5.13E-15 | -2.63127 | 1 | 1 CALM2P4        | K02183 |
| ENSG00000233663 | 5.13E-15 | -2.63127 | 1 | 1 RP11-497J7.1   | —      |
| ENSG00000233664 | 5.13E-15 | -2.63127 | 1 | 1 NDUFS5P3       | K03938 |
| ENSG00000233665 | 5.13E-15 | -2.63127 | 1 | 1 RP11-523O18.5  | —      |
| ENSG00000233670 | 5.13E-15 | -2.63127 | 1 | 1 PIRT           | —      |
| ENSG00000233674 | 5.13E-15 | -2.63127 | 1 | 1 RP11-184I16.3  | K12160 |
| ENSG00000233676 | 5.13E-15 | -2.63127 | 1 | 1 FDPSP6         | K00787 |
| ENSG00000233677 | 5.13E-15 | -2.63127 | 1 | 1 DDX39BP1       | —      |
| ENSG00000233680 | 5.13E-15 | -2.63127 | 1 | 1 HNRNPA1P27     | K12741 |

|                 |          |          |   |                    |        |
|-----------------|----------|----------|---|--------------------|--------|
| ENSG00000233681 | 5.13E-15 | -2.63127 | 1 | 1 CEACAMP1         | K06499 |
| ENSG00000233682 | 5.13E-15 | -2.63127 | 1 | 1 RP11-13P5.2      | -      |
| ENSG00000233683 | 5.13E-15 | -2.63127 | 1 | 1 RP5-1106H14.1    | K02934 |
| ENSG00000233685 | 5.13E-15 | -2.63127 | 1 | 1 OR6L1P           | K04257 |
| ENSG00000233686 | 5.13E-15 | -2.63127 | 1 | 1 PIEZO1P1         | -      |
| ENSG00000233688 | 5.13E-15 | -2.63127 | 1 | 1 CTD-2183H9.3     | K14816 |
| ENSG00000233689 | 5.13E-15 | -2.63127 | 1 | 1 RP11-123O1.1     | -      |
| ENSG00000233691 | 5.13E-15 | -2.63127 | 1 | 1 RP11-312J18.7    | K14810 |
| ENSG00000233693 | 5.13E-15 | -2.63127 | 1 | 1 RP11-506O24.1    | -      |
| ENSG00000233699 | 5.13E-15 | -2.63127 | 1 | 1 TTTY18           | -      |
| ENSG00000233701 | 5.13E-15 | -2.63127 | 1 | 1 PRR23C           | -      |
| ENSG00000233702 | 5.13E-15 | -2.63127 | 1 | 1 AC107083.1       | -      |
| ENSG00000233703 | 5.13E-15 | -2.63127 | 1 | 1 RP11-20E23.1     | -      |
| ENSG00000233705 | 5.13E-15 | -2.63127 | 1 | 1 SLC26A4-AS1      | -      |
| ENSG00000233706 | 5.13E-15 | -2.63127 | 1 | 1 RP5-1087E8.3     | -      |
| ENSG00000233707 | 5.13E-15 | -2.63127 | 1 | 1 RPL22P11         | K02891 |
| ENSG00000233708 | 5.13E-15 | -2.63127 | 1 | 1 RP11-342M1.7     | -      |
| ENSG00000233709 | 5.13E-15 | -2.63127 | 1 | 1 MTND4P28         | -      |
| ENSG00000233710 | 5.13E-15 | -2.63127 | 1 | 1 RP4-808O4.2      | K14396 |
| ENSG00000233711 | 5.13E-15 | -2.63127 | 1 | 1 EIF4EBP2P1       | K18644 |
| ENSG00000233712 | 5.13E-15 | -2.63127 | 1 | 1 RP4-801G22.3     | K06727 |
| ENSG00000233713 | 5.13E-15 | -2.63127 | 1 | 1 RP11-379P1.4     | -      |
| ENSG00000233714 | 5.13E-15 | -2.63127 | 1 | 1 AC012506.2       | -      |
| ENSG00000233716 | 5.13E-15 | -2.63127 | 1 | 1 AC074367.1       | -      |
| ENSG00000233717 | 5.13E-15 | -2.63127 | 1 | 1 RP11-68I18.2     | K02980 |
| ENSG00000233718 | 5.13E-15 | -2.63127 | 1 | 1 MYCNOS           | -      |
| ENSG00000233719 | 5.13E-15 | -2.63127 | 1 | 1 GOT2P3           | K14455 |
| ENSG00000233720 | 5.13E-15 | -2.63127 | 1 | 1 LL22NC03-30E12.1 | -      |
| ENSG00000233721 | 5.13E-15 | -2.63127 | 1 | 1 RP11-205K6.1     | -      |
| ENSG00000233723 | 5.13E-15 | -2.63127 | 1 | 1 LINC01122        | -      |
| ENSG00000233724 | 5.13E-15 | -2.63127 | 1 | 1 RP11-252C24.2    | K05633 |
| ENSG00000233727 | 5.13E-15 | -2.63127 | 1 | 1 RP11-380I20.2    | -      |
| ENSG00000233728 | 5.13E-15 | -2.63127 | 1 | 1 RP11-109P14.9    | -      |
| ENSG00000233729 | 5.13E-15 | -2.63127 | 1 | 1 AC016909.1       | -      |
| ENSG00000233730 | 5.13E-15 | -2.63127 | 1 | 1 RP4-666F24.3     | -      |
| ENSG00000233732 | 5.13E-15 | -2.63127 | 1 | 1 IGHV3OR16-10     | K06856 |
| ENSG00000233733 | 5.13E-15 | -2.63127 | 1 | 1 H2AFZP6          | K11251 |
| ENSG00000233735 | 5.13E-15 | -2.63127 | 1 | 1 RP11-567G24.3    | -      |
| ENSG00000233737 | 5.13E-15 | -2.63127 | 1 | 1 RP11-573M3.4     | K18193 |
| ENSG00000233739 | 5.13E-15 | -2.63127 | 1 | 1 RP5-1039K5.13    | -      |
| ENSG00000233740 | 5.13E-15 | -2.63127 | 1 | 1 CICIP2           | K16941 |
| ENSG00000233741 | 5.13E-15 | -2.63127 | 1 | 1 AC016691.2       | K02901 |
| ENSG00000233742 | 5.13E-15 | -2.63127 | 1 | 1 RP11-472D17.2    | -      |
| ENSG00000233746 | 5.13E-15 | -2.63127 | 1 | 1 LINC00656        | -      |
| ENSG00000233747 | 5.13E-15 | -2.63127 | 1 | 1 RPL36AP13        | K02929 |
| ENSG00000233750 | 5.13E-15 | -2.63127 | 1 | 1 CICIP27          | K12581 |
| ENSG00000233751 | 5.13E-15 | -2.63127 | 1 | 1 AC104772.1       | K07830 |
| ENSG00000233752 | 5.13E-15 | -2.63127 | 1 | 1 AC009414.1       | K02889 |
| ENSG00000233754 | 5.13E-15 | -2.63127 | 1 | 1 AP001628.7       | -      |
| ENSG00000233755 | 5.13E-15 | -2.63127 | 1 | 1 RP4-799D16.1     | -      |
| ENSG00000233756 | 5.13E-15 | -2.63127 | 1 | 1 DSCAM-IT1        | -      |
| ENSG00000233757 | 5.13E-15 | -2.63127 | 1 | 1 AC092835.2       | -      |
| ENSG00000233760 | 5.13E-15 | -2.63127 | 1 | 1 AC004947.2       | -      |
| ENSG00000233764 | 5.13E-15 | -2.63127 | 1 | 1 Z95114.4         | -      |
| ENSG00000233765 | 5.13E-15 | -2.63127 | 1 | 1 RP11-154P18.2    | -      |
| ENSG00000233766 | 5.13E-15 | -2.63127 | 1 | 1 AC098617.1       | -      |
| ENSG00000233767 | 5.13E-15 | -2.63127 | 1 | 1 PSMA6P3          | -      |
| ENSG00000233771 | 5.13E-15 | -2.63127 | 1 | 1 CICIP5           | K16941 |

|                 |          |          |   |                 |        |
|-----------------|----------|----------|---|-----------------|--------|
| ENSG00000233774 | 5.13E-15 | -2.63127 | 1 | 1 MED14P1       | —      |
| ENSG00000233778 | 5.13E-15 | -2.63127 | 1 | 1 RP11-777J24.1 | K02976 |
| ENSG00000233780 | 5.13E-15 | -2.63127 | 1 | 1 HNRNPA1P30    | K12741 |
| ENSG00000233782 | 5.13E-15 | -2.63127 | 1 | 1 ZNF90P3       | K09228 |
| ENSG00000233786 | 5.13E-15 | -2.63127 | 1 | 1 CDC27P1       | K03350 |
| ENSG00000233787 | 5.13E-15 | -2.63127 | 1 | 1 CTD-2057J6.1  | K10841 |
| ENSG00000233788 | 5.13E-15 | -2.63127 | 1 | 1 SPATA31A5     | —      |
| ENSG00000233791 | 5.13E-15 | -2.63127 | 1 | 1 LINC01136     | —      |
| ENSG00000233792 | 5.13E-15 | -2.63127 | 1 | 1 HDHD1P2       | K17623 |
| ENSG00000233796 | 5.13E-15 | -2.63127 | 1 | 1 AC089999.1    | K14808 |
| ENSG00000233798 | 5.13E-15 | -2.63127 | 1 | 1 RP11-417J8.2  | —      |
| ENSG00000233800 | 5.13E-15 | -2.63127 | 1 | 1 RP11-295G24.4 | —      |
| ENSG00000233802 | 5.13E-15 | -2.63127 | 1 | 1 TRIM49D2P     | K12019 |
| ENSG00000233803 | 5.13E-15 | -2.63127 | 1 | 1 TSPY4         | K11284 |
| ENSG00000233805 | 5.13E-15 | -2.63127 | 1 | 1 RP11-449J3.3  | K18441 |
| ENSG00000233807 | 5.13E-15 | -2.63127 | 1 | 1 RP11-268G12.2 | —      |
| ENSG00000233810 | 5.13E-15 | -2.63127 | 1 | 1 MOB1AP2       | —      |
| ENSG00000233812 | 5.13E-15 | -2.63127 | 1 | 1 AC139426.2    | —      |
| ENSG00000233814 | 5.13E-15 | -2.63127 | 1 | 1 RP11-66C24.1  | —      |
| ENSG00000233816 | 5.13E-15 | -2.63127 | 1 | 1 IFNA13        | K05414 |
| ENSG00000233817 | 5.13E-15 | -2.63127 | 1 | 1 RP11-168K11.3 | —      |
| ENSG00000233819 | 5.13E-15 | -2.63127 | 1 | 1 RP1-43O17.2   | —      |
| ENSG00000233820 | 5.13E-15 | -2.63127 | 1 | 1 RP11-535M15.2 | K15687 |
| ENSG00000233823 | 5.13E-15 | -2.63127 | 1 | 1 RP3-443C4.2   | —      |
| ENSG00000233824 | 5.13E-15 | -2.63127 | 1 | 1 AC003985.1    | —      |
| ENSG00000233828 | 5.13E-15 | -2.63127 | 1 | 1 AC008394.1    | —      |
| ENSG00000233829 | 5.13E-15 | -2.63127 | 1 | 1 AC017078.1    | K02898 |
| ENSG00000233832 | 5.13E-15 | -2.63127 | 1 | 1 RP11-96F8.1   | K01301 |
| ENSG00000233833 | 5.13E-15 | -2.63127 | 1 | 1 ETF1P3        | K03265 |
| ENSG00000233834 | 5.13E-15 | -2.63127 | 1 | 1 AC005083.1    | —      |
| ENSG00000233835 | 5.13E-15 | -2.63127 | 1 | 1 RP1-92C4.2    | —      |
| ENSG00000233836 | 5.13E-15 | -2.63127 | 1 | 1 RP11-255H23.2 | K09228 |
| ENSG00000233837 | 5.13E-15 | -2.63127 | 1 | 1 EIF3LP2       | K15029 |
| ENSG00000233839 | 5.13E-15 | -2.63127 | 1 | 1 RP11-389O22.4 | K02966 |
| ENSG00000233840 | 5.13E-15 | -2.63127 | 1 | 1 PCDH9-AS4     | —      |
| ENSG00000233842 | 5.13E-15 | -2.63127 | 1 | 1 AC062031.1    | —      |
| ENSG00000233843 | 5.13E-15 | -2.63127 | 1 | 1 CYCSP48       | K08738 |
| ENSG00000233844 | 5.13E-15 | -2.63127 | 1 | 1 KCNQ5-IT1     | —      |
| ENSG00000233848 | 5.13E-15 | -2.63127 | 1 | 1 RP3-348I23.2  | —      |
| ENSG00000233849 | 5.13E-15 | -2.63127 | 1 | 1 AC022201.5    | —      |
| ENSG00000233850 | 5.13E-15 | -2.63127 | 1 | 1 AC103563.8    | —      |
| ENSG00000233852 | 5.13E-15 | -2.63127 | 1 | 1 AC005304.1    | —      |
| ENSG00000233854 | 5.13E-15 | -2.63127 | 1 | 1 POU6F2-AS2    | —      |
| ENSG00000233858 | 5.13E-15 | -2.63127 | 1 | 1 AC026904.1    | —      |
| ENSG00000233860 | 5.13E-15 | -2.63127 | 1 | 1 RP11-359D14.2 | —      |
| ENSG00000233861 | 5.13E-15 | -2.63127 | 1 | 1 RP13-36C9.4   | K00736 |
| ENSG00000233862 | 5.13E-15 | -2.63127 | 1 | 1 AC016907.3    | —      |
| ENSG00000233863 | 5.13E-15 | -2.63127 | 1 | 1 AC012215.1    | —      |
| ENSG00000233864 | 5.13E-15 | -2.63127 | 1 | 1 TTTY15        | —      |
| ENSG00000233866 | 5.13E-15 | -2.63127 | 1 | 1 LA16c-4G1.3   | —      |
| ENSG00000233867 | 5.13E-15 | -2.63127 | 1 | 1 SLC9B1P3      | —      |
| ENSG00000233869 | 5.13E-15 | -2.63127 | 1 | 1 AC016697.1    | K02998 |
| ENSG00000233870 | 5.13E-15 | -2.63127 | 1 | 1 AC007881.4    | K00884 |
| ENSG00000233872 | 5.13E-15 | -2.63127 | 1 | 1 AC005033.6    | —      |
| ENSG00000233873 | 5.13E-15 | -2.63127 | 1 | 1 RPL7P44       | K02937 |
| ENSG00000233874 | 5.13E-15 | -2.63127 | 1 | 1 RP1-136J15.5  | K06030 |
| ENSG00000233875 | 5.13E-15 | -2.63127 | 1 | 1 RP11-61L14.6  | —      |
| ENSG00000233876 | 5.13E-15 | -2.63127 | 1 | 1 GAPDHP68      | K00134 |

|                 |          |          |   |                   |        |
|-----------------|----------|----------|---|-------------------|--------|
| ENSG00000233878 | 5.13E-15 | -2.63127 | 1 | 1 AC073133.1      | —      |
| ENSG00000233880 | 5.13E-15 | -2.63127 | 1 | 1 RP11-497J7.2    | K08066 |
| ENSG00000233882 | 5.13E-15 | -2.63127 | 1 | 1 RP11-309H21.2   | —      |
| ENSG00000233884 | 5.13E-15 | -2.63127 | 1 | 1 XXyac-YM21GA2.3 | —      |
| ENSG00000233887 | 5.13E-15 | -2.63127 | 1 | 1 ERVWE2          | —      |
| ENSG00000233888 | 5.13E-15 | -2.63127 | 1 | 1 AC009960.2      | —      |
| ENSG00000233889 | 5.13E-15 | -2.63127 | 1 | 1 AL353698.1      | —      |
| ENSG00000233891 | 5.13E-15 | -2.63127 | 1 | 1 AC007131.2      | —      |
| ENSG00000233892 | 5.13E-15 | -2.63127 | 1 | 1 PAIP1P1         | K14322 |
| ENSG00000233893 | 5.13E-15 | -2.63127 | 1 | 1 EZR-AS1         | —      |
| ENSG00000233894 | 5.13E-15 | -2.63127 | 1 | 1 RP4-650F12.2    | —      |
| ENSG00000233895 | 5.13E-15 | -2.63127 | 1 | 1 RP1-122P22.2    | —      |
| ENSG00000233896 | 5.13E-15 | -2.63127 | 1 | 1 RP4-684O24.5    | —      |
| ENSG00000233900 | 5.13E-15 | -2.63127 | 1 | 1 RPL17P35        | —      |
| ENSG00000233902 | 5.13E-15 | -2.63127 | 1 | 1 XXbac-BPG181B23 | K06751 |
| ENSG00000233905 | 5.13E-15 | -2.63127 | 1 | 1 LONRF2P2        | —      |
| ENSG00000233906 | 5.13E-15 | -2.63127 | 1 | 1 RP11-315I14.2   | —      |
| ENSG00000233907 | 5.13E-15 | -2.63127 | 1 | 1 RP4-617C6.1     | —      |
| ENSG00000233908 | 5.13E-15 | -2.63127 | 1 | 1 RP11-425D10.1   | K07910 |
| ENSG00000233909 | 5.13E-15 | -2.63127 | 1 | 1 UBE2V1P4        | K10704 |
| ENSG00000233910 | 5.13E-15 | -2.63127 | 1 | 1 GTF2F2P2        | —      |
| ENSG00000233915 | 5.13E-15 | -2.63127 | 1 | 1 UBE2Q2P10       | K10582 |
| ENSG00000233916 | 5.13E-15 | -2.63127 | 1 | 1 ZDHHC20P1       | K18932 |
| ENSG00000233917 | 5.13E-15 | -2.63127 | 1 | 1 POTE B          | K17299 |
| ENSG00000233918 | 5.13E-15 | -2.63127 | 1 | 1 RP11-715L17.1   | K14958 |
| ENSG00000233919 | 5.13E-15 | -2.63127 | 1 | 1 RP11-372H2.1    | —      |
| ENSG00000233920 | 5.13E-15 | -2.63127 | 1 | 1 RP5-1061H20.5   | —      |
| ENSG00000233921 | 5.13E-15 | -2.63127 | 1 | 1 RPS15AP40       | K02957 |
| ENSG00000233924 | 5.13E-15 | -2.63127 | 1 | 1 AL160471.6      | K02998 |
| ENSG00000233926 | 5.13E-15 | -2.63127 | 1 | 1 RP11-154D17.1   | —      |
| ENSG00000233928 | 5.13E-15 | -2.63127 | 1 | 1 RP11-305F18.1   | —      |
| ENSG00000233932 | 5.13E-15 | -2.63127 | 1 | 1 CTXN2           | —      |
| ENSG00000233933 | 5.13E-15 | -2.63127 | 1 | 1 RP11-63P12.2    | K00940 |
| ENSG00000233934 | 5.13E-15 | -2.63127 | 1 | 1 RPL21P38        | K02889 |
| ENSG00000233936 | 5.13E-15 | -2.63127 | 1 | 1 RP11-399H11.2   | —      |
| ENSG00000233938 | 5.13E-15 | -2.63127 | 1 | 1 PPP1R26P3       | K17565 |
| ENSG00000233939 | 5.13E-15 | -2.63127 | 1 | 1 AC114755.4      | K02900 |
| ENSG00000233940 | 5.13E-15 | -2.63127 | 1 | 1 RP11-248I9.2    | K02870 |
| ENSG00000233941 | 5.13E-15 | -2.63127 | 1 | 1 RP11-404H14.1   | —      |
| ENSG00000233942 | 5.13E-15 | -2.63127 | 1 | 1 AC004012.1      | —      |
| ENSG00000233943 | 5.13E-15 | -2.63127 | 1 | 1 AC114973.1      | K11094 |
| ENSG00000233944 | 5.13E-15 | -2.63127 | 1 | 1 LINC00265-3P    | —      |
| ENSG00000233945 | 5.13E-15 | -2.63127 | 1 | 1 RP11-344L13.2   | —      |
| ENSG00000233946 | 5.13E-15 | -2.63127 | 1 | 1 RP5-1114G22.1   | —      |
| ENSG00000233947 | 5.13E-15 | -2.63127 | 1 | 1 RP11-336N8.2    | K01940 |
| ENSG00000233951 | 5.13E-15 | -2.63127 | 1 | 1 RCC2P3          | —      |
| ENSG00000233952 | 5.13E-15 | -2.63127 | 1 | 1 FTLP15          | K13625 |
| ENSG00000233953 | 5.13E-15 | -2.63127 | 1 | 1 AC009970.1      | —      |
| ENSG00000233955 | 5.13E-15 | -2.63127 | 1 | 1 AHCYP3          | K01251 |
| ENSG00000233960 | 5.13E-15 | -2.63127 | 1 | 1 RP11-153N17.1   | —      |
| ENSG00000233962 | 5.13E-15 | -2.63127 | 1 | 1 RP11-368M16.8   | —      |
| ENSG00000233968 | 5.13E-15 | -2.63127 | 1 | 1 RP11-354E11.2   | —      |
| ENSG00000233969 | 5.13E-15 | -2.63127 | 1 | 1 RP5-1006K12.1   | —      |
| ENSG00000233970 | 5.13E-15 | -2.63127 | 1 | 1 AC092159.3      | —      |
| ENSG00000233971 | 5.13E-15 | -2.63127 | 1 | 1 RPS20P10        | K02969 |
| ENSG00000233973 | 5.13E-15 | -2.63127 | 1 | 1 RP4-598G3.1     | —      |
| ENSG00000233975 | 5.13E-15 | -2.63127 | 1 | 1 RP11-288L9.1    | —      |
| ENSG00000233977 | 5.13E-15 | -2.63127 | 1 | 1 RP11-310H4.2    | —      |

|                 |          |          |   |                    |        |
|-----------------|----------|----------|---|--------------------|--------|
| ENSG00000233979 | 5.13E-15 | -2.63127 | 1 | 1 AC002553.4       | K02891 |
| ENSG00000233980 | 5.13E-15 | -2.63127 | 1 | 1 FDPSP2           | K00787 |
| ENSG00000233981 | 5.13E-15 | -2.63127 | 1 | 1 RP3-380E11.2     | -      |
| ENSG00000233983 | 5.13E-15 | -2.63127 | 1 | 1 RP4-735N21.1     | -      |
| ENSG00000233984 | 5.13E-15 | -2.63127 | 1 | 1 RPSAP14          | K02998 |
| ENSG00000233985 | 5.13E-15 | -2.63127 | 1 | 1 RP11-297H3.3     | -      |
| ENSG00000233987 | 5.13E-15 | -2.63127 | 1 | 1 AC106706.1       | -      |
| ENSG00000233988 | 5.13E-15 | -2.63127 | 1 | 1 ADAM6            | -      |
| ENSG00000233990 | 5.13E-15 | -2.63127 | 1 | 1 RP11-401E9.3     | K02873 |
| ENSG00000233991 | 5.13E-15 | -2.63127 | 1 | 1 AC116050.1       | -      |
| ENSG00000233993 | 5.13E-15 | -2.63127 | 1 | 1 RP11-379J5.5     | -      |
| ENSG00000233995 | 5.13E-15 | -2.63127 | 1 | 1 KB-67B5.12       | K00922 |
| ENSG00000233997 | 5.13E-15 | -2.63127 | 1 | 1 AP000475.2       | -      |
| ENSG00000233999 | 5.13E-15 | -2.63127 | 1 | 1 IGKV3OR2-268     | -      |
| ENSG00000234001 | 5.13E-15 | -2.63127 | 1 | 1 AC000111.5       | -      |
| ENSG00000234005 | 5.13E-15 | -2.63127 | 1 | 1 GAPDHP22         | -      |
| ENSG00000234006 | 5.13E-15 | -2.63127 | 1 | 1 DDX39B-AS1       | -      |
| ENSG00000234007 | 5.13E-15 | -2.63127 | 1 | 1 AC020601.1       | -      |
| ENSG00000234008 | 5.13E-15 | -2.63127 | 1 | 1 PPP1R2P2         | K16833 |
| ENSG00000234011 | 5.13E-15 | -2.63127 | 1 | 1 RP3-461P17.10    | -      |
| ENSG00000234015 | 5.13E-15 | -2.63127 | 1 | 1 RP11-125M16.1    | -      |
| ENSG00000234016 | 5.13E-15 | -2.63127 | 1 | 1 GNG10P1          | K04545 |
| ENSG00000234019 | 5.13E-15 | -2.63127 | 1 | 1 RP11-236P24.3    | -      |
| ENSG00000234020 | 5.13E-15 | -2.63127 | 1 | 1 CHIAP3           | -      |
| ENSG00000234021 | 5.13E-15 | -2.63127 | 1 | 1 RP11-75C9.2      | -      |
| ENSG00000234022 | 5.13E-15 | -2.63127 | 1 | 1 AC008278.2       | -      |
| ENSG00000234025 | 5.13E-15 | -2.63127 | 1 | 1 RP11-257K9.3     | -      |
| ENSG00000234026 | 5.13E-15 | -2.63127 | 1 | 1 RP11-310E22.4    | -      |
| ENSG00000234031 | 5.13E-15 | -2.63127 | 1 | 1 RPS3AP44         | K02984 |
| ENSG00000234033 | 5.13E-15 | -2.63127 | 1 | 1 RAC1P8           | -      |
| ENSG00000234034 | 5.13E-15 | -2.63127 | 1 | 1 AP000959.2       | -      |
| ENSG00000234036 | 5.13E-15 | -2.63127 | 1 | 1 TXNP6            | K03671 |
| ENSG00000234037 | 5.13E-15 | -2.63127 | 1 | 1 RP11-347K2.2     | -      |
| ENSG00000234038 | 5.13E-15 | -2.63127 | 1 | 1 AC123768.3       | -      |
| ENSG00000234039 | 5.13E-15 | -2.63127 | 1 | 1 NDUFA5P7         | -      |
| ENSG00000234040 | 5.13E-15 | -2.63127 | 1 | 1 RP11-254B13.4    | K02866 |
| ENSG00000234042 | 5.13E-15 | -2.63127 | 1 | 1 RP11-452D2.2     | -      |
| ENSG00000234044 | 5.13E-15 | -2.63127 | 1 | 1 AC108059.1       | K11368 |
| ENSG00000234047 | 5.13E-15 | -2.63127 | 1 | 1 AC113612.1       | K17985 |
| ENSG00000234048 | 5.13E-15 | -2.63127 | 1 | 1 FAM96AP1         | -      |
| ENSG00000234050 | 5.13E-15 | -2.63127 | 1 | 1 LL0XNC01-237H1.3 | -      |
| ENSG00000234052 | 5.13E-15 | -2.63127 | 1 | 1 AP001607.1       | -      |
| ENSG00000234055 | 5.13E-15 | -2.63127 | 1 | 1 RP11-247A12.1    | -      |
| ENSG00000234056 | 5.13E-15 | -2.63127 | 1 | 1 AMER2-AS1        | -      |
| ENSG00000234059 | 5.13E-15 | -2.63127 | 1 | 1 CASKP1           | -      |
| ENSG00000234060 | 5.13E-15 | -2.63127 | 1 | 1 AC016906.1       | -      |
| ENSG00000234061 | 5.13E-15 | -2.63127 | 1 | 1 AC007969.4       | K12162 |
| ENSG00000234064 | 5.13E-15 | -2.63127 | 1 | 1 RP11-450I1.2     | -      |
| ENSG00000234066 | 5.13E-15 | -2.63127 | 1 | 1 TAS2R62P         | K08474 |
| ENSG00000234067 | 5.13E-15 | -2.63127 | 1 | 1 RPL5P10          | K02932 |
| ENSG00000234068 | 5.13E-15 | -2.63127 | 1 | 1 PAGE2            | -      |
| ENSG00000234069 | 5.13E-15 | -2.63127 | 1 | 1 GAPDHP53         | -      |
| ENSG00000234070 | 5.13E-15 | -2.63127 | 1 | 1 SPATA17-AS1      | -      |
| ENSG00000234071 | 5.13E-15 | -2.63127 | 1 | 1 RP11-420H19.1    | K17776 |
| ENSG00000234073 | 5.13E-15 | -2.63127 | 1 | 1 AC011816.1       | K11586 |
| ENSG00000234075 | 5.13E-15 | -2.63127 | 1 | 1 RPL35AP          | -      |
| ENSG00000234080 | 5.13E-15 | -2.63127 | 1 | 1 RP11-183G22.1    | K02981 |
| ENSG00000234081 | 5.13E-15 | -2.63127 | 1 | 1 TCEB1P10         | -      |

|                 |          |          |   |   |                |        |
|-----------------|----------|----------|---|---|----------------|--------|
| ENSG00000234083 | 5.13E-15 | -2.63127 | 1 | 1 | AJ006995.3     | -      |
| ENSG00000234085 | 5.13E-15 | -2.63127 | 1 | 1 | RP11-368M16.7  | -      |
| ENSG00000234086 | 5.13E-15 | -2.63127 | 1 | 1 | AL391994.1     | -      |
| ENSG00000234087 | 5.13E-15 | -2.63127 | 1 | 1 | CTD-3216D2.4   | -      |
| ENSG00000234088 | 5.13E-15 | -2.63127 | 1 | 1 | RPS15AP7       | K02957 |
| ENSG00000234089 | 5.13E-15 | -2.63127 | 1 | 1 | RP11-1217F2.15 | -      |
| ENSG00000234091 | 5.13E-15 | -2.63127 | 1 | 1 | RP11-353M9.1   | -      |
| ENSG00000234099 | 5.13E-15 | -2.63127 | 1 | 1 | MTND4P11       | -      |
| ENSG00000234102 | 5.13E-15 | -2.63127 | 1 | 1 | KRT19P4        | K07604 |
| ENSG00000234104 | 5.13E-15 | -2.63127 | 1 | 1 | RP5-1177M21.1  | -      |
| ENSG00000234105 | 5.13E-15 | -2.63127 | 1 | 1 | GS1-278J22.1   | -      |
| ENSG00000234106 | 5.13E-15 | -2.63127 | 1 | 1 | RP11-288E14.2  | K03104 |
| ENSG00000234107 | 5.13E-15 | -2.63127 | 1 | 1 | TPT1P1         | -      |
| ENSG00000234108 | 5.13E-15 | -2.63127 | 1 | 1 | RP11-115A15.2  | K02266 |
| ENSG00000234109 | 5.13E-15 | -2.63127 | 1 | 1 | RPL7P36        | K02937 |
| ENSG00000234110 | 5.13E-15 | -2.63127 | 1 | 1 | TSPY25P        | -      |
| ENSG00000234111 | 5.13E-15 | -2.63127 | 1 | 1 | RP11-364P22.1  | -      |
| ENSG00000234112 | 5.13E-15 | -2.63127 | 1 | 1 | RP11-145A3.4   | K04668 |
| ENSG00000234113 | 5.13E-15 | -2.63127 | 1 | 1 | AC008163.4     | -      |
| ENSG00000234115 | 5.13E-15 | -2.63127 | 1 | 1 | RP11-288G3.4   | K00031 |
| ENSG00000234116 | 5.13E-15 | -2.63127 | 1 | 1 | RP11-261C10.1  | -      |
| ENSG00000234117 | 5.13E-15 | -2.63127 | 1 | 1 | RP11-259P20.1  | -      |
| ENSG00000234119 | 5.13E-15 | -2.63127 | 1 | 1 | AC079248.1     | K01265 |
| ENSG00000234120 | 5.13E-15 | -2.63127 | 1 | 1 | AF228730.8     | K02974 |
| ENSG00000234121 | 5.13E-15 | -2.63127 | 1 | 1 | GPM6BP3        | -      |
| ENSG00000234122 | 5.13E-15 | -2.63127 | 1 | 1 | TRBV22OR9-2    | K10785 |
| ENSG00000234123 | 5.13E-15 | -2.63127 | 1 | 1 | RHBDF1P1       | -      |
| ENSG00000234124 | 5.13E-15 | -2.63127 | 1 | 1 | CSN1S2AP       | -      |
| ENSG00000234125 | 5.13E-15 | -2.63127 | 1 | 1 | EEF1GP8        | K03233 |
| ENSG00000234127 | 5.13E-15 | -2.63127 | 1 | 1 | TRIM26         | K12008 |
| ENSG00000234130 | 5.13E-15 | -2.63127 | 1 | 1 | RP13-88F20.1   | K11825 |
| ENSG00000234131 | 5.13E-15 | -2.63127 | 1 | 1 | TCEB1P8        | -      |
| ENSG00000234132 | 5.13E-15 | -2.63127 | 1 | 1 | RP11-168O16.2  | -      |
| ENSG00000234135 | 5.13E-15 | -2.63127 | 1 | 1 | RPL23AP83      | K02893 |
| ENSG00000234138 | 5.13E-15 | -2.63127 | 1 | 1 | RP11-144A16.1  | -      |
| ENSG00000234139 | 5.13E-15 | -2.63127 | 1 | 1 | RP4-550H1.4    | -      |
| ENSG00000234142 | 5.13E-15 | -2.63127 | 1 | 1 | RP11-276E17.2  | -      |
| ENSG00000234143 | 5.13E-15 | -2.63127 | 1 | 1 | UGT1A13P       | K00699 |
| ENSG00000234145 | 5.13E-15 | -2.63127 | 1 | 1 | NAP1L4P3       | K11279 |
| ENSG00000234146 | 5.13E-15 | -2.63127 | 1 | 1 | RP11-109M17.1  | K16525 |
| ENSG00000234149 | 5.13E-15 | -2.63127 | 1 | 1 | RP11-77G23.2   | -      |
| ENSG00000234152 | 5.13E-15 | -2.63127 | 1 | 1 | TCEB2P1        | K03873 |
| ENSG00000234156 | 5.13E-15 | -2.63127 | 1 | 1 | RP11-64P14.7   | -      |
| ENSG00000234158 | 5.13E-15 | -2.63127 | 1 | 1 | RPEP2          | K01783 |
| ENSG00000234159 | 5.13E-15 | -2.63127 | 1 | 1 | RBPMSLP        | -      |
| ENSG00000234161 | 5.13E-15 | -2.63127 | 1 | 1 | PABPC5-AS1     | -      |
| ENSG00000234162 | 5.13E-15 | -2.63127 | 1 | 1 | AC009505.4     | -      |
| ENSG00000234163 | 5.13E-15 | -2.63127 | 1 | 1 | RP11-479G22.6  | -      |
| ENSG00000234165 | 5.13E-15 | -2.63127 | 1 | 1 | AC114877.3     | -      |
| ENSG00000234166 | 5.13E-15 | -2.63127 | 1 | 1 | ARHGEF19-AS1   | -      |
| ENSG00000234167 | 5.13E-15 | -2.63127 | 1 | 1 | TCEB2P4        | -      |
| ENSG00000234168 | 5.13E-15 | -2.63127 | 1 | 1 | LINC01039      | -      |
| ENSG00000234169 | 5.13E-15 | -2.63127 | 1 | 1 | AC092168.3     | -      |
| ENSG00000234170 | 5.13E-15 | -2.63127 | 1 | 1 | RP11-446F3.2   | -      |
| ENSG00000234172 | 5.13E-15 | -2.63127 | 1 | 1 | AC093639.1     | -      |
| ENSG00000234173 | 5.13E-15 | -2.63127 | 1 | 1 | RP11-257I14.1  | -      |
| ENSG00000234174 | 5.13E-15 | -2.63127 | 1 | 1 | AC016683.5     | -      |
| ENSG00000234176 | 5.13E-15 | -2.63127 | 1 | 1 | HSPA8P1        | K03283 |

|                 |          |          |   |                 |        |
|-----------------|----------|----------|---|-----------------|--------|
| ENSG00000234177 | 5.13E-15 | -2.63127 | 1 | 1 LINC01114     | -      |
| ENSG00000234178 | 5.13E-15 | -2.63127 | 1 | 1 DEFA11P       | -      |
| ENSG00000234179 | 5.13E-15 | -2.63127 | 1 | 1 MTCYBP1       | -      |
| ENSG00000234181 | 5.13E-15 | -2.63127 | 1 | 1 RP11-182N22.8 | -      |
| ENSG00000234182 | 5.13E-15 | -2.63127 | 1 | 1 RP11-118K6.2  | -      |
| ENSG00000234184 | 5.13E-15 | -2.63127 | 1 | 1 RP5-887A10.1  | -      |
| ENSG00000234186 | 5.13E-15 | -2.63127 | 1 | 1 C16orf82      | -      |
| ENSG00000234187 | 5.13E-15 | -2.63127 | 1 | 1 AIMP1P1       | K15437 |
| ENSG00000234188 | 5.13E-15 | -2.63127 | 1 | 1 AL121963.1    | K19479 |
| ENSG00000234189 | 5.13E-15 | -2.63127 | 1 | 1 AC099799.1    | -      |
| ENSG00000234190 | 5.13E-15 | -2.63127 | 1 | 1 RP11-433J22.3 | -      |
| ENSG00000234191 | 5.13E-15 | -2.63127 | 1 | 1 RP11-157D23.2 | -      |
| ENSG00000234192 | 5.13E-15 | -2.63127 | 1 | 1 RP11-57C13.5  | K02976 |
| ENSG00000234199 | 5.13E-15 | -2.63127 | 1 | 1 AC010982.1    | -      |
| ENSG00000234200 | 5.13E-15 | -2.63127 | 1 | 1 U82671.8      | -      |
| ENSG00000234201 | 5.13E-15 | -2.63127 | 1 | 1 RP11-383C12.2 | K11459 |
| ENSG00000234202 | 5.13E-15 | -2.63127 | 1 | 1 RP11-330C7.4  | K11253 |
| ENSG00000234204 | 5.13E-15 | -2.63127 | 1 | 1 PIGPP2        | K03861 |
| ENSG00000234206 | 5.13E-15 | -2.63127 | 1 | 1 RP1-67A8.3    | -      |
| ENSG00000234207 | 5.13E-15 | -2.63127 | 1 | 1 AC096570.2    | -      |
| ENSG00000234208 | 5.13E-15 | -2.63127 | 1 | 1 CTA-256D12.11 | -      |
| ENSG00000234210 | 5.13E-15 | -2.63127 | 1 | 1 AC006372.4    | -      |
| ENSG00000234211 | 5.13E-15 | -2.63127 | 1 | 1 RP11-25K21.1  | -      |
| ENSG00000234213 | 5.13E-15 | -2.63127 | 1 | 1 FHP1          | K01679 |
| ENSG00000234214 | 5.13E-15 | -2.63127 | 1 | 1 SPATA31A4     | -      |
| ENSG00000234215 | 5.13E-15 | -2.63127 | 1 | 1 RP5-942I16.1  | -      |
| ENSG00000234217 | 5.13E-15 | -2.63127 | 1 | 1 RBPJP7        | K06053 |
| ENSG00000234219 | 5.13E-15 | -2.63127 | 1 | 1 RP11-454L1.2  | -      |
| ENSG00000234223 | 5.13E-15 | -2.63127 | 1 | 1 AC003988.1    | -      |
| ENSG00000234224 | 5.13E-15 | -2.63127 | 1 | 1 TMEM229A      | -      |
| ENSG00000234225 | 5.13E-15 | -2.63127 | 1 | 1 RP4-704D21.2  | -      |
| ENSG00000234226 | 5.13E-15 | -2.63127 | 1 | 1 NDUFS5P2      | K03938 |
| ENSG00000234227 | 5.13E-15 | -2.63127 | 1 | 1 RPL7L1P1      | -      |
| ENSG00000234228 | 5.13E-15 | -2.63127 | 1 | 1 NCLP2         | K11294 |
| ENSG00000234229 | 5.13E-15 | -2.63127 | 1 | 1 RP11-308N19.4 | -      |
| ENSG00000234232 | 5.13E-15 | -2.63127 | 1 | 1 RP11-353N4.5  | -      |
| ENSG00000234233 | 5.13E-15 | -2.63127 | 1 | 1 KCNH1-IT1     | -      |
| ENSG00000234234 | 5.13E-15 | -2.63127 | 1 | 1 RP11-3N2.7    | -      |
| ENSG00000234235 | 5.13E-15 | -2.63127 | 1 | 1 BOK-AS1       | -      |
| ENSG00000234237 | 5.13E-15 | -2.63127 | 1 | 1 AL162431.1    | K15696 |
| ENSG00000234238 | 5.13E-15 | -2.63127 | 1 | 1 RP11-430L16.1 | -      |
| ENSG00000234239 | 5.13E-15 | -2.63127 | 1 | 1 CFL1P8        | -      |
| ENSG00000234241 | 5.13E-15 | -2.63127 | 1 | 1 RP4-775C13.1  | K13160 |
| ENSG00000234244 | 5.13E-15 | -2.63127 | 1 | 1 RP11-139J15.5 | -      |
| ENSG00000234247 | 5.13E-15 | -2.63127 | 1 | 1 RP11-100E13.3 | K09512 |
| ENSG00000234248 | 5.13E-15 | -2.63127 | 1 | 1 RP11-799O21.2 | -      |
| ENSG00000234253 | 5.13E-15 | -2.63127 | 1 | 1 RPL7P13       | K02937 |
| ENSG00000234255 | 5.13E-15 | -2.63127 | 1 | 1 AC012370.3    | -      |
| ENSG00000234256 | 5.13E-15 | -2.63127 | 1 | 1 PTCO2P2       | K17711 |
| ENSG00000234257 | 5.13E-15 | -2.63127 | 1 | 1 SOD2P1        | -      |
| ENSG00000234259 | 5.13E-15 | -2.63127 | 1 | 1 CTC-507E12.1  | K02864 |
| ENSG00000234261 | 5.13E-15 | -2.63127 | 1 | 1 RP11-146I2.1  | -      |
| ENSG00000234262 | 5.13E-15 | -2.63127 | 1 | 1 RP1-20N18.4   | -      |
| ENSG00000234265 | 5.13E-15 | -2.63127 | 1 | 1 RP11-157E14.1 | -      |
| ENSG00000234267 | 5.13E-15 | -2.63127 | 1 | 1 TULP3P1       | -      |
| ENSG00000234269 | 5.13E-15 | -2.63127 | 1 | 1 RP11-338N12.1 | -      |
| ENSG00000234270 | 5.13E-15 | -2.63127 | 1 | 1 RPL36P20      | -      |
| ENSG00000234271 | 5.13E-15 | -2.63127 | 1 | 1 RP1-138B7.4   | -      |



|                 |          |          |   |                    |        |
|-----------------|----------|----------|---|--------------------|--------|
| ENSG00000234272 | 5.13E-15 | -2.63127 | 1 | 1 RPL30P2          | K02908 |
| ENSG00000234273 | 5.13E-15 | -2.63127 | 1 | 1 AC073071.1       | -      |
| ENSG00000234274 | 5.13E-15 | -2.63127 | 1 | 1 COX7BP2          | K02271 |
| ENSG00000234275 | 5.13E-15 | -2.63127 | 1 | 1 AC017053.1       | -      |
| ENSG00000234276 | 5.13E-15 | -2.63127 | 1 | 1 BX664724.4       | -      |
| ENSG00000234277 | 5.13E-15 | -2.63127 | 1 | 1 CTD-2090I13.1    | -      |
| ENSG00000234278 | 5.13E-15 | -2.63127 | 1 | 1 PRR20E           | -      |
| ENSG00000234279 | 5.13E-15 | -2.63127 | 1 | 1 AC113618.1       | -      |
| ENSG00000234282 | 5.13E-15 | -2.63127 | 1 | 1 RP4-673D20.4     | -      |
| ENSG00000234283 | 5.13E-15 | -2.63127 | 1 | 1 RP11-495P10.6    | -      |
| ENSG00000234284 | 5.13E-15 | -2.63127 | 1 | 1 ZNF879           | K09228 |
| ENSG00000234285 | 5.13E-15 | -2.63127 | 1 | 1 GAPDHP49         | -      |
| ENSG00000234286 | 5.13E-15 | -2.63127 | 1 | 1 AC006026.13      | -      |
| ENSG00000234288 | 5.13E-15 | -2.63127 | 1 | 1 OR1AA1P          | K04257 |
| ENSG00000234293 | 5.13E-15 | -2.63127 | 1 | 1 BACH1-IT3        | -      |
| ENSG00000234296 | 5.13E-15 | -2.63127 | 1 | 1 RP13-16H11.7     | -      |
| ENSG00000234298 | 5.13E-15 | -2.63127 | 1 | 1 TCEB3CL          | K15076 |
| ENSG00000234299 | 5.13E-15 | -2.63127 | 1 | 1 CDK2AP2P1        | -      |
| ENSG00000234300 | 5.13E-15 | -2.63127 | 1 | 1 LINC00229        | -      |
| ENSG00000234303 | 5.13E-15 | -2.63127 | 1 | 1 CLYBL-AS1        | -      |
| ENSG00000234304 | 5.13E-15 | -2.63127 | 1 | 1 RP11-398K14.1    | K11580 |
| ENSG00000234306 | 5.13E-15 | -2.63127 | 1 | 1 RP11-271F18.1    | -      |
| ENSG00000234308 | 5.13E-15 | -2.63127 | 1 | 1 AC093381.2       | -      |
| ENSG00000234309 | 5.13E-15 | -2.63127 | 1 | 1 SLC25A18P1       | -      |
| ENSG00000234312 | 5.13E-15 | -2.63127 | 1 | 1 RP11-196D18.4    | -      |
| ENSG00000234315 | 5.13E-15 | -2.63127 | 1 | 1 OSTCP5           | -      |
| ENSG00000234318 | 5.13E-15 | -2.63127 | 1 | 1 RP4-771M4.3      | -      |
| ENSG00000234320 | 5.13E-15 | -2.63127 | 1 | 1 RP11-381O7.6     | -      |
| ENSG00000234323 | 5.13E-15 | -2.63127 | 1 | 1 RP11-308N19.1    | -      |
| ENSG00000234325 | 5.13E-15 | -2.63127 | 1 | 1 MRPS10P2         | -      |
| ENSG00000234333 | 5.13E-15 | -2.63127 | 1 | 1 CYCSP53          | -      |
| ENSG00000234340 | 5.13E-15 | -2.63127 | 1 | 1 AP000705.8       | -      |
| ENSG00000234344 | 5.13E-15 | -2.63127 | 1 | 1 MEP1AP3          | K01395 |
| ENSG00000234345 | 5.13E-15 | -2.63127 | 1 | 1 LL0XNC01-116E7.1 | K09428 |
| ENSG00000234349 | 5.13E-15 | -2.63127 | 1 | 1 GLUD1P9          | K08575 |
| ENSG00000234350 | 5.13E-15 | -2.63127 | 1 | 1 AC007405.4       | -      |
| ENSG00000234352 | 5.13E-15 | -2.63127 | 1 | 1 hsa-mir-490      | -      |
| ENSG00000234355 | 5.13E-15 | -2.63127 | 1 | 1 FTH1P27          | K00522 |
| ENSG00000234356 | 5.13E-15 | -2.63127 | 1 | 1 AC009945.4       | -      |
| ENSG00000234358 | 5.13E-15 | -2.63127 | 1 | 1 AC003080.4       | K02936 |
| ENSG00000234359 | 5.13E-15 | -2.63127 | 1 | 1 ELK1P1           | K04375 |
| ENSG00000234360 | 5.13E-15 | -2.63127 | 1 | 1 RP11-87N24.1     | K02951 |
| ENSG00000234361 | 5.13E-15 | -2.63127 | 1 | 1 RP11-52J3.3      | -      |
| ENSG00000234363 | 5.13E-15 | -2.63127 | 1 | 1 PPIAP27          | K03767 |
| ENSG00000234367 | 5.13E-15 | -2.63127 | 1 | 1 PFN1P3           | K05759 |
| ENSG00000234375 | 5.13E-15 | -2.63127 | 1 | 1 VN2R4P           | -      |
| ENSG00000234376 | 5.13E-15 | -2.63127 | 1 | 1 UBTFL2           | -      |
| ENSG00000234379 | 5.13E-15 | -2.63127 | 1 | 1 HMGB1P48         | K10802 |
| ENSG00000234381 | 5.13E-15 | -2.63127 | 1 | 1 MED15P7          | K15157 |
| ENSG00000234385 | 5.13E-15 | -2.63127 | 1 | 1 RCC2P1           | -      |
| ENSG00000234386 | 5.13E-15 | -2.63127 | 1 | 1 OR7E162P         | K04257 |
| ENSG00000234387 | 5.13E-15 | -2.63127 | 1 | 1 RP11-340I6.1     | -      |
| ENSG00000234388 | 5.13E-15 | -2.63127 | 1 | 1 TXNP3            | K03671 |
| ENSG00000234389 | 5.13E-15 | -2.63127 | 1 | 1 AC007278.3       | -      |
| ENSG00000234390 | 5.13E-15 | -2.63127 | 1 | 1 USP27X-AS1       | -      |
| ENSG00000234391 | 5.13E-15 | -2.63127 | 1 | 1 RP11-344N17.6    | K00819 |
| ENSG00000234394 | 5.13E-15 | -2.63127 | 1 | 1 RP11-561O23.5    | -      |
| ENSG00000234397 | 5.13E-15 | -2.63127 | 1 | 1 RP11-415K20.1    | K03767 |

|                 |          |          |   |                  |        |
|-----------------|----------|----------|---|------------------|--------|
| ENSG00000234398 | 5.13E-15 | -2.63127 | 1 | 1 AC134915.1     | -      |
| ENSG00000234399 | 5.13E-15 | -2.63127 | 1 | 1 RBMY2XP        | K12885 |
| ENSG00000234402 | 5.13E-15 | -2.63127 | 1 | 1 ELK2BP         | K04375 |
| ENSG00000234404 | 5.13E-15 | -2.63127 | 1 | 1 BX682235.1     | -      |
| ENSG00000234407 | 5.13E-15 | -2.63127 | 1 | 1 FAM74A6        | -      |
| ENSG00000234413 | 5.13E-15 | -2.63127 | 1 | 1 RP6-29D12.2    | K13348 |
| ENSG00000234414 | 5.13E-15 | -2.63127 | 1 | 1 RBMY1A1        | K12885 |
| ENSG00000234415 | 5.13E-15 | -2.63127 | 1 | 1 RPL5P7         | K02932 |
| ENSG00000234416 | 5.13E-15 | -2.63127 | 1 | 1 SNX18P4        | K17299 |
| ENSG00000234418 | 5.13E-15 | -2.63127 | 1 | 1 RP11-560I19.1  | -      |
| ENSG00000234419 | 5.13E-15 | -2.63127 | 1 | 1 CICP13         | K16941 |
| ENSG00000234421 | 5.13E-15 | -2.63127 | 1 | 1 SLC25A5P4      | K05863 |
| ENSG00000234422 | 5.13E-15 | -2.63127 | 1 | 1 UBE2WP1        | K10688 |
| ENSG00000234425 | 5.13E-15 | -2.63127 | 1 | 1 RP11-528G1.2   | -      |
| ENSG00000234426 | 5.13E-15 | -2.63127 | 1 | 1 RP11-459O1.2   | -      |
| ENSG00000234429 | 5.13E-15 | -2.63127 | 1 | 1 AC105342.1     | -      |
| ENSG00000234430 | 5.13E-15 | -2.63127 | 1 | 1 SNX18P6        | K17923 |
| ENSG00000234431 | 5.13E-15 | -2.63127 | 1 | 1 AC007283.5     | -      |
| ENSG00000234432 | 5.13E-15 | -2.63127 | 1 | 1 RP11-1275H24.1 | -      |
| ENSG00000234435 | 5.13E-15 | -2.63127 | 1 | 1 RP11-125P18.1  | -      |
| ENSG00000234436 | 5.13E-15 | -2.63127 | 1 | 1 AC008984.7     | K06512 |
| ENSG00000234437 | 5.13E-15 | -2.63127 | 1 | 1 RP1-206D15.3   | -      |
| ENSG00000234438 | 5.13E-15 | -2.63127 | 1 | 1 KBTBD13        | -      |
| ENSG00000234439 | 5.13E-15 | -2.63127 | 1 | 1 KRT18P2        | K07604 |
| ENSG00000234441 | 5.13E-15 | -2.63127 | 1 | 1 RP5-1108M17.5  | K01176 |
| ENSG00000234442 | 5.13E-15 | -2.63127 | 1 | 1 BX276092.3     | -      |
| ENSG00000234445 | 5.13E-15 | -2.63127 | 1 | 1 FGF14-AS1      | -      |
| ENSG00000234446 | 5.13E-15 | -2.63127 | 1 | 1 AC068489.1     | -      |
| ENSG00000234448 | 5.13E-15 | -2.63127 | 1 | 1 RP11-344N17.13 | K00819 |
| ENSG00000234450 | 5.13E-15 | -2.63127 | 1 | 1 AC005534.6     | K02898 |
| ENSG00000234451 | 5.13E-15 | -2.63127 | 1 | 1 RP11-211N8.6   | -      |
| ENSG00000234452 | 5.13E-15 | -2.63127 | 1 | 1 RP11-168O10.6  | -      |
| ENSG00000234453 | 5.13E-15 | -2.63127 | 1 | 1 RP11-488L4.1   | -      |
| ENSG00000234454 | 5.13E-15 | -2.63127 | 1 | 1 RP1-14D6.2     | -      |
| ENSG00000234455 | 5.13E-15 | -2.63127 | 1 | 1 AC067960.1     | -      |
| ENSG00000234456 | 5.13E-15 | -2.63127 | 1 | 1 MAGI2-AS3      | -      |
| ENSG00000234457 | 5.13E-15 | -2.63127 | 1 | 1 AC006960.5     | K02924 |
| ENSG00000234458 | 5.13E-15 | -2.63127 | 1 | 1 OR7E130P       | K04257 |
| ENSG00000234459 | 5.13E-15 | -2.63127 | 1 | 1 AC002064.4     | -      |
| ENSG00000234463 | 5.13E-15 | -2.63127 | 1 | 1 COX6CP12       | K02268 |
| ENSG00000234464 | 5.13E-15 | -2.63127 | 1 | 1 RP11-136B18.2  | -      |
| ENSG00000234466 | 5.13E-15 | -2.63127 | 1 | 1 RP11-266I3.1   | K17985 |
| ENSG00000234467 | 5.13E-15 | -2.63127 | 1 | 1 SLC25A1P2      | K15100 |
| ENSG00000234469 | 5.13E-15 | -2.63127 | 1 | 1 AC002365.1     | -      |
| ENSG00000234474 | 5.13E-15 | -2.63127 | 1 | 1 RP11-501J20.2  | -      |
| ENSG00000234477 | 5.13E-15 | -2.63127 | 1 | 1 AC004231.2     | -      |
| ENSG00000234479 | 5.13E-15 | -2.63127 | 1 | 1 AP1B1P1        | K12392 |
| ENSG00000234480 | 5.13E-15 | -2.63127 | 1 | 1 AC073869.8     | -      |
| ENSG00000234481 | 5.13E-15 | -2.63127 | 1 | 1 RP4-614N24.1   | -      |
| ENSG00000234482 | 5.13E-15 | -2.63127 | 1 | 1 RP11-433J22.2  | -      |
| ENSG00000234484 | 5.13E-15 | -2.63127 | 1 | 1 RP1-55C23.7    | -      |
| ENSG00000234485 | 5.13E-15 | -2.63127 | 1 | 1 OR7E46P        | K04257 |
| ENSG00000234488 | 5.13E-15 | -2.63127 | 1 | 1 AC096664.1     | K02901 |
| ENSG00000234489 | 5.13E-15 | -2.63127 | 1 | 1 ALDH7A1P4      | K14085 |
| ENSG00000234491 | 5.13E-15 | -2.63127 | 1 | 1 HNRNPA1P51     | K12741 |
| ENSG00000234492 | 5.13E-15 | -2.63127 | 1 | 1 RPL34-AS1      | -      |
| ENSG00000234493 | 5.13E-15 | -2.63127 | 1 | 1 GS1-421I3.2    | -      |
| ENSG00000234496 | 5.13E-15 | -2.63127 | 1 | 1 MRPS21P1       | K02970 |

|                 |          |          |   |                 |        |
|-----------------|----------|----------|---|-----------------|--------|
| ENSG00000234497 | 5.13E-15 | -2.63127 | 1 | 1 RP4-612J11.1  | -      |
| ENSG00000234502 | 5.13E-15 | -2.63127 | 1 | 1 FYTTD1P1      | -      |
| ENSG00000234503 | 5.13E-15 | -2.63127 | 1 | 1 KB-1592A4.14  | -      |
| ENSG00000234504 | 5.13E-15 | -2.63127 | 1 | 1 RP11-285G1.2  | -      |
| ENSG00000234506 | 5.13E-15 | -2.63127 | 1 | 1 RP11-274B18.2 | -      |
| ENSG00000234511 | 5.13E-15 | -2.63127 | 1 | 1 C5orf58       | -      |
| ENSG00000234512 | 5.13E-15 | -2.63127 | 1 | 1 TLR12P        | K18807 |
| ENSG00000234513 | 5.13E-15 | -2.63127 | 1 | 1 AC073072.7    | K02976 |
| ENSG00000234515 | 5.13E-15 | -2.63127 | 1 | 1 PPP1R2P1      | K16833 |
| ENSG00000234519 | 5.13E-15 | -2.63127 | 1 | 1 RP3-495K2.1   | -      |
| ENSG00000234521 | 5.13E-15 | -2.63127 | 1 | 1 AC005041.11   | -      |
| ENSG00000234522 | 5.13E-15 | -2.63127 | 1 | 1 RP11-572P18.2 | -      |
| ENSG00000234524 | 5.13E-15 | -2.63127 | 1 | 1 RPL12P43      | K02870 |
| ENSG00000234527 | 5.13E-15 | -2.63127 | 1 | 1 PCDH9-AS1     | -      |
| ENSG00000234529 | 5.13E-15 | -2.63127 | 1 | 1 GAPDHP19      | K00134 |
| ENSG00000234531 | 5.13E-15 | -2.63127 | 1 | 1 RP11-288G11.3 | -      |
| ENSG00000234534 | 5.13E-15 | -2.63127 | 1 | 1 RP11-39K24.2  | K08958 |
| ENSG00000234538 | 5.13E-15 | -2.63127 | 1 | 1 ZNF114P1      | K09228 |
| ENSG00000234540 | 5.13E-15 | -2.63127 | 1 | 1 RP3-448I9.1   | -      |
| ENSG00000234541 | 5.13E-15 | -2.63127 | 1 | 1 CHEK2P5       | K06641 |
| ENSG00000234542 | 5.13E-15 | -2.63127 | 1 | 1 RP11-282I1.2  | -      |
| ENSG00000234544 | 5.13E-15 | -2.63127 | 1 | 1 PTGES3P5      | -      |
| ENSG00000234551 | 5.13E-15 | -2.63127 | 1 | 1 RP11-123H22.1 | -      |
| ENSG00000234557 | 5.13E-15 | -2.63127 | 1 | 1 RP1-164F3.8   | K03767 |
| ENSG00000234558 | 5.13E-15 | -2.63127 | 1 | 1 API5P1        | -      |
| ENSG00000234559 | 5.13E-15 | -2.63127 | 1 | 1 AC079776.4    | K02891 |
| ENSG00000234560 | 5.13E-15 | -2.63127 | 1 | 1 OR10G8        | K04257 |
| ENSG00000234564 | 5.13E-15 | -2.63127 | 1 | 1 HSPA8P20      | K03283 |
| ENSG00000234565 | 5.13E-15 | -2.63127 | 1 | 1 COX6B1P1      | K02267 |
| ENSG00000234566 | 5.13E-15 | -2.63127 | 1 | 1 RPL7AP71      | K02936 |
| ENSG00000234568 | 5.13E-15 | -2.63127 | 1 | 1 BIN2P1        | -      |
| ENSG00000234569 | 5.13E-15 | -2.63127 | 1 | 1 RAD1P1        | K02830 |
| ENSG00000234570 | 5.13E-15 | -2.63127 | 1 | 1 ZFRP1         | K13203 |
| ENSG00000234571 | 5.13E-15 | -2.63127 | 1 | 1 RP5-998N21.4  | -      |
| ENSG00000234572 | 5.13E-15 | -2.63127 | 1 | 1 AC007880.1    | -      |
| ENSG00000234573 | 5.13E-15 | -2.63127 | 1 | 1 RP5-1116H23.1 | -      |
| ENSG00000234575 | 5.13E-15 | -2.63127 | 1 | 1 CTSLP8        | K01365 |
| ENSG00000234576 | 5.13E-15 | -2.63127 | 1 | 1 MTND1P26      | -      |
| ENSG00000234577 | 5.13E-15 | -2.63127 | 1 | 1 SYNE1-AS1     | -      |
| ENSG00000234578 | 5.13E-15 | -2.63127 | 1 | 1 RP4-784A16.1  | -      |
| ENSG00000234579 | 5.13E-15 | -2.63127 | 1 | 1 AC009305.1    | -      |
| ENSG00000234580 | 5.13E-15 | -2.63127 | 1 | 1 RP11-733D4.1  | -      |
| ENSG00000234583 | 5.13E-15 | -2.63127 | 1 | 1 TSPY19P       | K11284 |
| ENSG00000234584 | 5.13E-15 | -2.63127 | 1 | 1 AC019186.1    | -      |
| ENSG00000234586 | 5.13E-15 | -2.63127 | 1 | 1 RP11-382H24.2 | K11090 |
| ENSG00000234587 | 5.13E-15 | -2.63127 | 1 | 1 MRPL50P1      | -      |
| ENSG00000234588 | 5.13E-15 | -2.63127 | 1 | 1 FABP5P14      | -      |
| ENSG00000234590 | 5.13E-15 | -2.63127 | 1 | 1 GNG5P5        | K04542 |
| ENSG00000234592 | 5.13E-15 | -2.63127 | 1 | 1 RP11-41L14.1  | K06105 |
| ENSG00000234593 | 5.13E-15 | -2.63127 | 1 | 1 RP4-704D23.1  | -      |
| ENSG00000234594 | 5.13E-15 | -2.63127 | 1 | 1 RP11-263C16.2 | K02256 |
| ENSG00000234595 | 5.13E-15 | -2.63127 | 1 | 1 AC013733.3    | -      |
| ENSG00000234597 | 5.13E-15 | -2.63127 | 1 | 1 AC010096.1    | -      |
| ENSG00000234601 | 5.13E-15 | -2.63127 | 1 | 1 CHRM3-AS1     | -      |
| ENSG00000234603 | 5.13E-15 | -2.63127 | 1 | 1 AL356740.1    | -      |
| ENSG00000234604 | 5.13E-15 | -2.63127 | 1 | 1 RP1-206D15.5  | K02125 |
| ENSG00000234607 | 5.13E-15 | -2.63127 | 1 | 1 RP11-5P18.1   | -      |
| ENSG00000234611 | 5.13E-15 | -2.63127 | 1 | 1 OR2AT2P       | K04257 |

|                 |          |          |   |                  |        |
|-----------------|----------|----------|---|------------------|--------|
| ENSG00000234612 | 5.13E-15 | -2.63127 | 1 | 1 H2AFZP5        | -      |
| ENSG00000234613 | 5.13E-15 | -2.63127 | 1 | 1 RP5-1158E12.1  | -      |
| ENSG00000234617 | 5.13E-15 | -2.63127 | 1 | 1 SNRK-AS1       | -      |
| ENSG00000234619 | 5.13E-15 | -2.63127 | 1 | 1 RPL7P11        | K02937 |
| ENSG00000234620 | 5.13E-15 | -2.63127 | 1 | 1 HDHD1P1        | K17623 |
| ENSG00000234622 | 5.13E-15 | -2.63127 | 1 | 1 RP13-297E16.5  | -      |
| ENSG00000234624 | 5.13E-15 | -2.63127 | 1 | 1 AC016894.1     | K02866 |
| ENSG00000234625 | 5.13E-15 | -2.63127 | 1 | 1 LINC00380      | -      |
| ENSG00000234626 | 5.13E-15 | -2.63127 | 1 | 1 RP1-149A16.12  | -      |
| ENSG00000234627 | 5.13E-15 | -2.63127 | 1 | 1 NUS1P3         | K19177 |
| ENSG00000234629 | 5.13E-15 | -2.63127 | 1 | 1 WDR82P1        | K14962 |
| ENSG00000234631 | 5.13E-15 | -2.63127 | 1 | 1 AL162407.1     | -      |
| ENSG00000234632 | 5.13E-15 | -2.63127 | 1 | 1 NECAP1P2       | K13857 |
| ENSG00000234634 | 5.13E-15 | -2.63127 | 1 | 1 AC003664.1     | -      |
| ENSG00000234637 | 5.13E-15 | -2.63127 | 1 | 1 RPS19P6        | -      |
| ENSG00000234638 | 5.13E-15 | -2.63127 | 1 | 1 AC053503.6     | -      |
| ENSG00000234639 | 5.13E-15 | -2.63127 | 1 | 1 AC009263.2     | K11584 |
| ENSG00000234640 | 5.13E-15 | -2.63127 | 1 | 1 RP11-264E18.1  | -      |
| ENSG00000234643 | 5.13E-15 | -2.63127 | 1 | 1 EIF3FP1        | K03249 |
| ENSG00000234644 | 5.13E-15 | -2.63127 | 1 | 1 RP11-360J12.1  | -      |
| ENSG00000234645 | 5.13E-15 | -2.63127 | 1 | 1 YWHAEP5        | K06630 |
| ENSG00000234646 | 5.13E-15 | -2.63127 | 1 | 1 RP4-753D10.3   | -      |
| ENSG00000234647 | 5.13E-15 | -2.63127 | 1 | 1 RP11-503C24.4  | -      |
| ENSG00000234652 | 5.13E-15 | -2.63127 | 1 | 1 AGPAT5P1       | K19007 |
| ENSG00000234653 | 5.13E-15 | -2.63127 | 1 | 1 AC079117.1     | -      |
| ENSG00000234654 | 5.13E-15 | -2.63127 | 1 | 1 RP11-782C8.8   | K03880 |
| ENSG00000234655 | 5.13E-15 | -2.63127 | 1 | 1 OR7E155P       | K04257 |
| ENSG00000234658 | 5.13E-15 | -2.63127 | 1 | 1 AC013429.4     | K02889 |
| ENSG00000234660 | 5.13E-15 | -2.63127 | 1 | 1 LINC00440      | -      |
| ENSG00000234661 | 5.13E-15 | -2.63127 | 1 | 1 CHL1-AS1       | -      |
| ENSG00000234663 | 5.13E-15 | -2.63127 | 1 | 1 AC104820.2     | -      |
| ENSG00000234667 | 5.13E-15 | -2.63127 | 1 | 1 ACTBP13        | K11447 |
| ENSG00000234670 | 5.13E-15 | -2.63127 | 1 | 1 OR6C64P        | K04257 |
| ENSG00000234671 | 5.13E-15 | -2.63127 | 1 | 1 RP11-1217F2.13 | K00412 |
| ENSG00000234675 | 5.13E-15 | -2.63127 | 1 | 1 RP11-242F11.2  | -      |
| ENSG00000234676 | 5.13E-15 | -2.63127 | 1 | 1 RP11-337A23.3  | -      |
| ENSG00000234677 | 5.13E-15 | -2.63127 | 1 | 1 RP11-285A18.2  | -      |
| ENSG00000234680 | 5.13E-15 | -2.63127 | 1 | 1 VN2R3P         | -      |
| ENSG00000234682 | 5.13E-15 | -2.63127 | 1 | 1 AC110620.2     | -      |
| ENSG00000234683 | 5.13E-15 | -2.63127 | 1 | 1 RP5-837I24.5   | K02969 |
| ENSG00000234685 | 5.13E-15 | -2.63127 | 1 | 1 NUS1P2         | K19177 |
| ENSG00000234686 | 5.13E-15 | -2.63127 | 1 | 1 AC010971.1     | -      |
| ENSG00000234688 | 5.13E-15 | -2.63127 | 1 | 1 RP1-293L6.1    | -      |
| ENSG00000234689 | 5.13E-15 | -2.63127 | 1 | 1 LINC00444      | -      |
| ENSG00000234690 | 5.13E-15 | -2.63127 | 1 | 1 AC073283.4     | -      |
| ENSG00000234692 | 5.13E-15 | -2.63127 | 1 | 1 RP11-445L6.3   | -      |
| ENSG00000234695 | 5.13E-15 | -2.63127 | 1 | 1 AC002076.10    | -      |
| ENSG00000234696 | 5.13E-15 | -2.63127 | 1 | 1 GPR50-AS1      | -      |
| ENSG00000234700 | 5.13E-15 | -2.63127 | 1 | 1 RP11-3N2.5     | -      |
| ENSG00000234701 | 5.13E-15 | -2.63127 | 1 | 1 PRDX3P3        | K03386 |
| ENSG00000234702 | 5.13E-15 | -2.63127 | 1 | 1 VDACP3         | K05862 |
| ENSG00000234703 | 5.13E-15 | -2.63127 | 1 | 1 AF015262.2     | -      |
| ENSG00000234706 | 5.13E-15 | -2.63127 | 1 | 1 PRUNEP1        | K01514 |
| ENSG00000234707 | 5.13E-15 | -2.63127 | 1 | 1 RP11-745C15.2  | -      |
| ENSG00000234710 | 5.13E-15 | -2.63127 | 1 | 1 AC060834.3     | -      |
| ENSG00000234712 | 5.13E-15 | -2.63127 | 1 | 1 RP11-143G3.1   | -      |
| ENSG00000234713 | 5.13E-15 | -2.63127 | 1 | 1 RP11-726G23.10 | -      |
| ENSG00000234714 | 5.13E-15 | -2.63127 | 1 | 1 AC009965.2     | -      |

|                 |          |          |   |                    |        |
|-----------------|----------|----------|---|--------------------|--------|
| ENSG00000234715 | 5.13E-15 | -2.63127 | 1 | 1 CTB-107G13.1     | -      |
| ENSG00000234716 | 5.13E-15 | -2.63127 | 1 | 1 RP11-760D2.9     | K09228 |
| ENSG00000234717 | 5.13E-15 | -2.63127 | 1 | 1 TMEM212-AS1      | -      |
| ENSG00000234720 | 5.13E-15 | -2.63127 | 1 | 1 ATP5A1P8         | K02132 |
| ENSG00000234721 | 5.13E-15 | -2.63127 | 1 | 1 AC125421.1       | -      |
| ENSG00000234722 | 5.13E-15 | -2.63127 | 1 | 1 AC073236.3       | -      |
| ENSG00000234723 | 5.13E-15 | -2.63127 | 1 | 1 AC092421.1       | -      |
| ENSG00000234724 | 5.13E-15 | -2.63127 | 1 | 1 HDAC1P1          | K06067 |
| ENSG00000234725 | 5.13E-15 | -2.63127 | 1 | 1 RP11-157L3.1     | -      |
| ENSG00000234726 | 5.13E-15 | -2.63127 | 1 | 1 LL22NC03-123E1.5 | -      |
| ENSG00000234730 | 5.13E-15 | -2.63127 | 1 | 1 AF241725.4       | -      |
| ENSG00000234731 | 5.13E-15 | -2.63127 | 1 | 1 AC007163.11      | -      |
| ENSG00000234732 | 5.13E-15 | -2.63127 | 1 | 1 RPEP5            | -      |
| ENSG00000234734 | 5.13E-15 | -2.63127 | 1 | 1 SPATA31A7        | -      |
| ENSG00000234735 | 5.13E-15 | -2.63127 | 1 | 1 AL022237.3       | K02975 |
| ENSG00000234736 | 5.13E-15 | -2.63127 | 1 | 1 FAM170B-AS1      | -      |
| ENSG00000234737 | 5.13E-15 | -2.63127 | 1 | 1 KRT18P15         | K07604 |
| ENSG00000234744 | 5.13E-15 | -2.63127 | 1 | 1 USP9YP26         | -      |
| ENSG00000234745 | 5.13E-15 | -2.63127 | 1 | 1 HLA-B            | K06751 |
| ENSG00000234748 | 5.13E-15 | -2.63127 | 1 | 1 RP11-183K14.1    | K07949 |
| ENSG00000234749 | 5.13E-15 | -2.63127 | 1 | 1 FAM90A21P        | -      |
| ENSG00000234751 | 5.13E-15 | -2.63127 | 1 | 1 AP002381.2       | K02877 |
| ENSG00000234752 | 5.13E-15 | -2.63127 | 1 | 1 RP11-428L9.1     | -      |
| ENSG00000234756 | 5.13E-15 | -2.63127 | 1 | 1 RP11-120C12.3    | -      |
| ENSG00000234757 | 5.13E-15 | -2.63127 | 1 | 1 CA15P2           | K01672 |
| ENSG00000234758 | 5.13E-15 | -2.63127 | 1 | 1 AC034228.4       | -      |
| ENSG00000234761 | 5.13E-15 | -2.63127 | 1 | 1 RP11-38O14.5     | -      |
| ENSG00000234763 | 5.13E-15 | -2.63127 | 1 | 1 RP11-203H2.2     | -      |
| ENSG00000234765 | 5.13E-15 | -2.63127 | 1 | 1 ELL2P3           | K15183 |
| ENSG00000234766 | 5.13E-15 | -2.63127 | 1 | 1 RP11-56H2.2      | -      |
| ENSG00000234767 | 5.13E-15 | -2.63127 | 1 | 1 LINC01052        | -      |
| ENSG00000234768 | 5.13E-15 | -2.63127 | 1 | 1 RP11-503C24.1    | -      |
| ENSG00000234770 | 5.13E-15 | -2.63127 | 1 | 1 GULOP            | K00103 |
| ENSG00000234775 | 5.13E-15 | -2.63127 | 1 | 1 RP11-335O13.7    | -      |
| ENSG00000234776 | 5.13E-15 | -2.63127 | 1 | 1 C11orf94         | -      |
| ENSG00000234777 | 5.13E-15 | -2.63127 | 1 | 1 RP11-125D12.2    | -      |
| ENSG00000234780 | 5.13E-15 | -2.63127 | 1 | 1 RP11-552E4.2     | K00819 |
| ENSG00000234781 | 5.13E-15 | -2.63127 | 1 | 1 LINC01103        | -      |
| ENSG00000234784 | 5.13E-15 | -2.63127 | 1 | 1 RP11-182I10.1    | K03948 |
| ENSG00000234785 | 5.13E-15 | -2.63127 | 1 | 1 EEF1GP5          | K03233 |
| ENSG00000234787 | 5.13E-15 | -2.63127 | 1 | 1 LINC00458        | -      |
| ENSG00000234789 | 5.13E-15 | -2.63127 | 1 | 1 RP11-483H20.4    | -      |
| ENSG00000234790 | 5.13E-15 | -2.63127 | 1 | 1 RP11-426L16.7    | -      |
| ENSG00000234791 | 5.13E-15 | -2.63127 | 1 | 1 AC108448.3       | -      |
| ENSG00000234792 | 5.13E-15 | -2.63127 | 1 | 1 RP11-552J9.6     | K00819 |
| ENSG00000234795 | 5.13E-15 | -2.63127 | 1 | 1 RFTN1P1          | K09513 |
| ENSG00000234800 | 5.13E-15 | -2.63127 | 1 | 1 PCMTD1P3         | -      |
| ENSG00000234803 | 5.13E-15 | -2.63127 | 1 | 1 FAM197Y2         | -      |
| ENSG00000234810 | 5.13E-15 | -2.63127 | 1 | 1 RP11-466L17.1    | -      |
| ENSG00000234811 | 5.13E-15 | -2.63127 | 1 | 1 RP11-241I20.5    | K07910 |
| ENSG00000234812 | 5.13E-15 | -2.63127 | 1 | 1 RP11-146D12.6    | -      |
| ENSG00000234813 | 5.13E-15 | -2.63127 | 1 | 1 RP11-288D15.1    | K03083 |
| ENSG00000234816 | 5.13E-15 | -2.63127 | 1 | 1 U91328.2         | K11251 |
| ENSG00000234818 | 5.13E-15 | -2.63127 | 1 | 1 AC092687.5       | -      |
| ENSG00000234819 | 5.13E-15 | -2.63127 | 1 | 1 RP11-336N8.4     | K02219 |
| ENSG00000234821 | 5.13E-15 | -2.63127 | 1 | 1 MRPS33P4         | -      |
| ENSG00000234825 | 5.13E-15 | -2.63127 | 1 | 1 XRCC6P2          | K10884 |
| ENSG00000234828 | 5.13E-15 | -2.63127 | 1 | 1 RP11-526A4.1     | -      |

|                 |          |          |   |                 |        |
|-----------------|----------|----------|---|-----------------|--------|
| ENSG00000234829 | 5.13E-15 | -2.63127 | 1 | 1 IFNA17        | K05414 |
| ENSG00000234830 | 5.13E-15 | -2.63127 | 1 | 1 FAM197Y9      | -      |
| ENSG00000234835 | 5.13E-15 | -2.63127 | 1 | 1 PHBP13        | K17080 |
| ENSG00000234837 | 5.13E-15 | -2.63127 | 1 | 1 AC073464.6    | K09228 |
| ENSG00000234838 | 5.13E-15 | -2.63127 | 1 | 1 RP11-5P22.1   | K03767 |
| ENSG00000234839 | 5.13E-15 | -2.63127 | 1 | 1 RPS26P30      | K02976 |
| ENSG00000234841 | 5.13E-15 | -2.63127 | 1 | 1 RP11-119H12.4 | K03129 |
| ENSG00000234842 | 5.13E-15 | -2.63127 | 1 | 1 AC007163.8    | -      |
| ENSG00000234844 | 5.13E-15 | -2.63127 | 1 | 1 CDC42P2       | K04393 |
| ENSG00000234848 | 5.13E-15 | -2.63127 | 1 | 1 CTD-3105H18.7 | -      |
| ENSG00000234850 | 5.13E-15 | -2.63127 | 1 | 1 MTND2P3       | -      |
| ENSG00000234853 | 5.13E-15 | -2.63127 | 1 | 1 NDUFA5P3      | K03949 |
| ENSG00000234854 | 5.13E-15 | -2.63127 | 1 | 1 LINC00676     | -      |
| ENSG00000234855 | 5.13E-15 | -2.63127 | 1 | 1 RP11-453E2.2  | -      |
| ENSG00000234859 | 5.13E-15 | -2.63127 | 1 | 1 AC003958.2    | -      |
| ENSG00000234860 | 5.13E-15 | -2.63127 | 1 | 1 RP11-547C13.1 | -      |
| ENSG00000234861 | 5.13E-15 | -2.63127 | 1 | 1 ATP5A1P6      | K02132 |
| ENSG00000234862 | 5.13E-15 | -2.63127 | 1 | 1 RP5-1097P24.1 | -      |
| ENSG00000234863 | 5.13E-15 | -2.63127 | 1 | 1 RP11-410C4.2  | -      |
| ENSG00000234864 | 5.13E-15 | -2.63127 | 1 | 1 AL022344.5    | -      |
| ENSG00000234865 | 5.13E-15 | -2.63127 | 1 | 1 CTD-2138O14.1 | K00121 |
| ENSG00000234872 | 5.13E-15 | -2.63127 | 1 | 1 RP11-467I20.5 | -      |
| ENSG00000234877 | 5.13E-15 | -2.63127 | 1 | 1 AC092660.1    | -      |
| ENSG00000234878 | 5.13E-15 | -2.63127 | 1 | 1 HSPE1P1       | K04078 |
| ENSG00000234881 | 5.13E-15 | -2.63127 | 1 | 1 PIGFP2        | K05287 |
| ENSG00000234882 | 5.13E-15 | -2.63127 | 1 | 1 EIF3EP1       | K03250 |
| ENSG00000234883 | 5.13E-15 | -2.63127 | 1 | 1 MIR155HG      | -      |
| ENSG00000234884 | 5.13E-15 | -2.63127 | 1 | 1 CTA-407F11.8  | -      |
| ENSG00000234886 | 5.13E-15 | -2.63127 | 1 | 1 MTND5P26      | -      |
| ENSG00000234888 | 5.13E-15 | -2.63127 | 1 | 1 OFD1P15Y      | K16480 |
| ENSG00000234889 | 5.13E-15 | -2.63127 | 1 | 1 RP13-130D24.1 | K01557 |
| ENSG00000234890 | 5.13E-15 | -2.63127 | 1 | 1 HNRNPDLP2     | K13044 |
| ENSG00000234891 | 5.13E-15 | -2.63127 | 1 | 1 RP1-288L1.5   | -      |
| ENSG00000234892 | 5.13E-15 | -2.63127 | 1 | 1 Z82214.2      | -      |
| ENSG00000234894 | 5.13E-15 | -2.63127 | 1 | 1 RP11-408E5.6  | -      |
| ENSG00000234895 | 5.13E-15 | -2.63127 | 1 | 1 OR52X1P       | K04257 |
| ENSG00000234896 | 5.13E-15 | -2.63127 | 1 | 1 OR7E62P       | K04257 |
| ENSG00000234898 | 5.13E-15 | -2.63127 | 1 | 1 CHEK2P3       | K06641 |
| ENSG00000234899 | 5.13E-15 | -2.63127 | 1 | 1 SOX9-AS1      | -      |
| ENSG00000234900 | 5.13E-15 | -2.63127 | 1 | 1 RP1-278O22.2  | -      |
| ENSG00000234901 | 5.13E-15 | -2.63127 | 1 | 1 MTND6P13      | -      |
| ENSG00000234903 | 5.13E-15 | -2.63127 | 1 | 1 AC133104.2    | K12019 |
| ENSG00000234906 | 5.13E-15 | -2.63127 | 1 | 1 APOC2         | -      |
| ENSG00000234907 | 5.13E-15 | -2.63127 | 1 | 1 RP11-415H23.4 | K02924 |
| ENSG00000234910 | 5.13E-15 | -2.63127 | 1 | 1 IL6RPI        | K05055 |
| ENSG00000234915 | 5.13E-15 | -2.63127 | 1 | 1 RP11-384C4.7  | -      |
| ENSG00000234918 | 5.13E-15 | -2.63127 | 1 | 1 RP11-20F24.2  | -      |
| ENSG00000234922 | 5.13E-15 | -2.63127 | 1 | 1 TSEN15P3      | -      |
| ENSG00000234927 | 5.13E-15 | -2.63127 | 1 | 1 HMGN1P18      | K11299 |
| ENSG00000234928 | 5.13E-15 | -2.63127 | 1 | 1 AP000344.3    | -      |
| ENSG00000234929 | 5.13E-15 | -2.63127 | 1 | 1 AC018685.1    | -      |
| ENSG00000234931 | 5.13E-15 | -2.63127 | 1 | 1 MARK2P15      | -      |
| ENSG00000234932 | 5.13E-15 | -2.63127 | 1 | 1 AC009969.1    | K15687 |
| ENSG00000234933 | 5.13E-15 | -2.63127 | 1 | 1 CDC42P1       | K04393 |
| ENSG00000234934 | 5.13E-15 | -2.63127 | 1 | 1 MTND5P29      | K03883 |
| ENSG00000234938 | 5.13E-15 | -2.63127 | 1 | 1 AC012668.1    | -      |
| ENSG00000234939 | 5.13E-15 | -2.63127 | 1 | 1 MTND2P18      | K03879 |
| ENSG00000234940 | 5.13E-15 | -2.63127 | 1 | 1 AC023128.1    | -      |

|                 |          |          |   |                  |        |
|-----------------|----------|----------|---|------------------|--------|
| ENSG00000234941 | 5.13E-15 | -2.63127 | 1 | 1 RP11-508N22.11 | K10843 |
| ENSG00000234942 | 5.13E-15 | -2.63127 | 1 | 1 RP11-93H12.2   | -      |
| ENSG00000234943 | 5.13E-15 | -2.63127 | 1 | 1 AC092839.4     | -      |
| ENSG00000234944 | 5.13E-15 | -2.63127 | 1 | 1 RP11-124O11.1  | -      |
| ENSG00000234946 | 5.13E-15 | -2.63127 | 1 | 1 SDHCP3         | K00236 |
| ENSG00000234948 | 5.13E-15 | -2.63127 | 1 | 1 RP4-723E3.1    | -      |
| ENSG00000234950 | 5.13E-15 | -2.63127 | 1 | 1 RBMY2OP        | -      |
| ENSG00000234952 | 5.13E-15 | -2.63127 | 1 | 1 RP11-328K15.1  | -      |
| ENSG00000234953 | 5.13E-15 | -2.63127 | 1 | 1 RP5-837I24.2   | -      |
| ENSG00000234956 | 5.13E-15 | -2.63127 | 1 | 1 RP11-356I2.1   | -      |
| ENSG00000234958 | 5.13E-15 | -2.63127 | 1 | 1 FABP5P13       | K08754 |
| ENSG00000234964 | 5.13E-15 | -2.63127 | 1 | 1 FABP5P7        | K08754 |
| ENSG00000234965 | 5.13E-15 | -2.63127 | 1 | 1 SHISA8         | -      |
| ENSG00000234967 | 5.13E-15 | -2.63127 | 1 | 1 RP11-347D21.1  | -      |
| ENSG00000234972 | 5.13E-15 | -2.63127 | 1 | 1 TBC1D3C        | K11837 |
| ENSG00000234977 | 5.13E-15 | -2.63127 | 1 | 1 AC074389.7     | -      |
| ENSG00000234979 | 5.13E-15 | -2.63127 | 1 | 1 CITF22-24E5.1  | -      |
| ENSG00000234981 | 5.13E-15 | -2.63127 | 1 | 1 RP11-534L20.4  | K02936 |
| ENSG00000234982 | 5.13E-15 | -2.63127 | 1 | 1 RP11-280O24.3  | K02936 |
| ENSG00000234983 | 5.13E-15 | -2.63127 | 1 | 1 AC010132.11    | K13137 |
| ENSG00000234984 | 5.13E-15 | -2.63127 | 1 | 1 FMO10P         | K00485 |
| ENSG00000234985 | 5.13E-15 | -2.63127 | 1 | 1 RP11-3L10.3    | K09056 |
| ENSG00000234988 | 5.13E-15 | -2.63127 | 1 | 1 AC068538.4     | -      |
| ENSG00000234993 | 5.13E-15 | -2.63127 | 1 | 1 CUBNP2         | K14616 |
| ENSG00000234995 | 5.13E-15 | -2.63127 | 1 | 1 AC013429.5     | K02984 |
| ENSG00000234997 | 5.13E-15 | -2.63127 | 1 | 1 AC016745.3     | -      |
| ENSG00000234998 | 5.13E-15 | -2.63127 | 1 | 1 RP11-439A17.10 | -      |
| ENSG00000235002 | 5.13E-15 | -2.63127 | 1 | 1 RP11-157D18.2  | K02957 |
| ENSG00000235003 | 5.13E-15 | -2.63127 | 1 | 1 RP11-459O16.7  | -      |
| ENSG00000235004 | 5.13E-15 | -2.63127 | 1 | 1 USP9YP30       | -      |
| ENSG00000235007 | 5.13E-15 | -2.63127 | 1 | 1 RP11-344B5.4   | -      |
| ENSG00000235009 | 5.13E-15 | -2.63127 | 1 | 1 AC093822.1     | -      |
| ENSG00000235010 | 5.13E-15 | -2.63127 | 1 | 1 RP11-140A10.3  | -      |
| ENSG00000235011 | 5.13E-15 | -2.63127 | 1 | 1 RP4-726F1.1    | -      |
| ENSG00000235012 | 5.13E-15 | -2.63127 | 1 | 1 AF121897.4     | -      |
| ENSG00000235013 | 5.13E-15 | -2.63127 | 1 | 1 COX20P2        | K18184 |
| ENSG00000235014 | 5.13E-15 | -2.63127 | 1 | 1 REREP2Y        | K05628 |
| ENSG00000235015 | 5.13E-15 | -2.63127 | 1 | 1 RP11-216N14.1  | K13130 |
| ENSG00000235018 | 5.13E-15 | -2.63127 | 1 | 1 RP11-11M20.2   | K02880 |
| ENSG00000235020 | 5.13E-15 | -2.63127 | 1 | 1 RP11-109I13.2  | -      |
| ENSG00000235024 | 5.13E-15 | -2.63127 | 1 | 1 AC097468.7     | -      |
| ENSG00000235026 | 5.13E-15 | -2.63127 | 1 | 1 DPP10-AS1      | -      |
| ENSG00000235032 | 5.13E-15 | -2.63127 | 1 | 1 RP4-813D12.2   | -      |
| ENSG00000235033 | 5.13E-15 | -2.63127 | 1 | 1 RP11-61I13.3   | -      |
| ENSG00000235035 | 5.13E-15 | -2.63127 | 1 | 1 AC007395.3     | -      |
| ENSG00000235037 | 5.13E-15 | -2.63127 | 1 | 1 RP11-187C18.5  | -      |
| ENSG00000235038 | 5.13E-15 | -2.63127 | 1 | 1 RP11-393I23.4  | -      |
| ENSG00000235039 | 5.13E-15 | -2.63127 | 1 | 1 MTND6P12       | -      |
| ENSG00000235040 | 5.13E-15 | -2.63127 | 1 | 1 MTCO3P1        | K02262 |
| ENSG00000235042 | 5.13E-15 | -2.63127 | 1 | 1 AC098820.2     | -      |
| ENSG00000235047 | 5.13E-15 | -2.63127 | 1 | 1 AC016751.3     | -      |
| ENSG00000235049 | 5.13E-15 | -2.63127 | 1 | 1 LINC00940      | -      |
| ENSG00000235050 | 5.13E-15 | -2.63127 | 1 | 1 MLIP-AS1       | -      |
| ENSG00000235051 | 5.13E-15 | -2.63127 | 1 | 1 RP11-637O19.2  | -      |
| ENSG00000235054 | 5.13E-15 | -2.63127 | 1 | 1 RP5-1166F10.1  | -      |
| ENSG00000235055 | 5.13E-15 | -2.63127 | 1 | 1 RP4-609E1.2    | K11415 |
| ENSG00000235056 | 5.13E-15 | -2.63127 | 1 | 1 AC010983.1     | -      |
| ENSG00000235058 | 5.13E-15 | -2.63127 | 1 | 1 ZMYND10-AS1    | -      |

|                 |          |          |   |                  |        |
|-----------------|----------|----------|---|------------------|--------|
| ENSG00000235059 | 5.13E-15 | -2.63127 | 1 | 1 AC008175.1     | -      |
| ENSG00000235060 | 5.13E-15 | -2.63127 | 1 | 1 VDAC1P4        | K05862 |
| ENSG00000235061 | 5.13E-15 | -2.63127 | 1 | 1 UBE2V1P7       | -      |
| ENSG00000235064 | 5.13E-15 | -2.63127 | 1 | 1 SLC25A5P2      | K05863 |
| ENSG00000235069 | 5.13E-15 | -2.63127 | 1 | 1 RP4-785J1.1    | -      |
| ENSG00000235071 | 5.13E-15 | -2.63127 | 1 | 1 RP11-759L5.2   | K04079 |
| ENSG00000235073 | 5.13E-15 | -2.63127 | 1 | 1 RBM22P10       | K12872 |
| ENSG00000235076 | 5.13E-15 | -2.63127 | 1 | 1 GAPDHP52       | K00134 |
| ENSG00000235077 | 5.13E-15 | -2.63127 | 1 | 1 AC073842.19    | -      |
| ENSG00000235080 | 5.13E-15 | -2.63127 | 1 | 1 MTND5P23       | K03883 |
| ENSG00000235081 | 5.13E-15 | -2.63127 | 1 | 1 AC010492.2     | K18749 |
| ENSG00000235083 | 5.13E-15 | -2.63127 | 1 | 1 RP11-669M2.2   | -      |
| ENSG00000235086 | 5.13E-15 | -2.63127 | 1 | 1 FNDC1-IT1      | -      |
| ENSG00000235088 | 5.13E-15 | -2.63127 | 1 | 1 RP4-620E11.4   | -      |
| ENSG00000235089 | 5.13E-15 | -2.63127 | 1 | 1 RP3-445O10.1   | K02865 |
| ENSG00000235090 | 5.13E-15 | -2.63127 | 1 | 1 RPL7LIP3       | -      |
| ENSG00000235091 | 5.13E-15 | -2.63127 | 1 | 1 WI2-85898F10.1 | -      |
| ENSG00000235094 | 5.13E-15 | -2.63127 | 1 | 1 AC006335.10    | -      |
| ENSG00000235095 | 5.13E-15 | -2.63127 | 1 | 1 RP11-1217F2.1  | K18695 |
| ENSG00000235096 | 5.13E-15 | -2.63127 | 1 | 1 RP11-83A16.1   | -      |
| ENSG00000235097 | 5.13E-15 | -2.63127 | 1 | 1 LINC00330      | -      |
| ENSG00000235098 | 5.13E-15 | -2.63127 | 1 | 1 ANKRD65        | -      |
| ENSG00000235099 | 5.13E-15 | -2.63127 | 1 | 1 RP1-23E21.2    | -      |
| ENSG00000235101 | 5.13E-15 | -2.63127 | 1 | 1 SETP9          | K11290 |
| ENSG00000235102 | 5.13E-15 | -2.63127 | 1 | 1 RP3-450M14.1   | -      |
| ENSG00000235108 | 5.13E-15 | -2.63127 | 1 | 1 IFNA12P        | -      |
| ENSG00000235110 | 5.13E-15 | -2.63127 | 1 | 1 RP11-8J23.1    | K02962 |
| ENSG00000235112 | 5.13E-15 | -2.63127 | 1 | 1 HSPE1P27       | -      |
| ENSG00000235113 | 5.13E-15 | -2.63127 | 1 | 1 RP11-241I20.4  | -      |
| ENSG00000235115 | 5.13E-15 | -2.63127 | 1 | 1 CHCHD2P8       | -      |
| ENSG00000235117 | 5.13E-15 | -2.63127 | 1 | 1 RP11-229P13.20 | -      |
| ENSG00000235118 | 5.13E-15 | -2.63127 | 1 | 1 AC010731.4     | -      |
| ENSG00000235119 | 5.13E-15 | -2.63127 | 1 | 1 RP11-9M16.2    | -      |
| ENSG00000235120 | 5.13E-15 | -2.63127 | 1 | 1 BSN-AS1        | -      |
| ENSG00000235122 | 5.13E-15 | -2.63127 | 1 | 1 RP3-417L20.4   | -      |
| ENSG00000235124 | 5.13E-15 | -2.63127 | 1 | 1 KRT8P17        | K07605 |
| ENSG00000235126 | 5.13E-15 | -2.63127 | 1 | 1 AC128709.3     | -      |
| ENSG00000235127 | 5.13E-15 | -2.63127 | 1 | 1 AC068286.1     | -      |
| ENSG00000235128 | 5.13E-15 | -2.63127 | 1 | 1 AC013474.4     | K12022 |
| ENSG00000235130 | 5.13E-15 | -2.63127 | 1 | 1 MYO5BP1        | K10357 |
| ENSG00000235131 | 5.13E-15 | -2.63127 | 1 | 1 RP5-1092A11.2  | -      |
| ENSG00000235133 | 5.13E-15 | -2.63127 | 1 | 1 RPL35AP22      | K02917 |
| ENSG00000235136 | 5.13E-15 | -2.63127 | 1 | 1 RP13-146A14.1  | -      |
| ENSG00000235137 | 5.13E-15 | -2.63127 | 1 | 1 HSP90AB6P      | K04079 |
| ENSG00000235139 | 5.13E-15 | -2.63127 | 1 | 1 AC003984.1     | -      |
| ENSG00000235140 | 5.13E-15 | -2.63127 | 1 | 1 RP11-135D11.2  | -      |
| ENSG00000235141 | 5.13E-15 | -2.63127 | 1 | 1 COX6CP17       | K02268 |
| ENSG00000235142 | 5.13E-15 | -2.63127 | 1 | 1 RP1-60O19.1    | -      |
| ENSG00000235143 | 5.13E-15 | -2.63127 | 1 | 1 RP1-65J11.5    | -      |
| ENSG00000235145 | 5.13E-15 | -2.63127 | 1 | 1 RP11-533E19.3  | K02998 |
| ENSG00000235146 | 5.13E-15 | -2.63127 | 1 | 1 RP5-857K21.2   | -      |
| ENSG00000235147 | 5.13E-15 | -2.63127 | 1 | 1 AC128677.3     | K12019 |
| ENSG00000235148 | 5.13E-15 | -2.63127 | 1 | 1 HMGB3P23       | K11296 |
| ENSG00000235149 | 5.13E-15 | -2.63127 | 1 | 1 RP11-45I20.1   | -      |
| ENSG00000235150 | 5.13E-15 | -2.63127 | 1 | 1 RCBTB2P1       | K11494 |
| ENSG00000235151 | 5.13E-15 | -2.63127 | 1 | 1 AC114730.2     | -      |
| ENSG00000235152 | 5.13E-15 | -2.63127 | 1 | 1 RP5-865N13.2   | -      |
| ENSG00000235154 | 5.13E-15 | -2.63127 | 1 | 1 CTA-280A3__B.2 | -      |



|                 |          |          |   |                 |        |
|-----------------|----------|----------|---|-----------------|--------|
| ENSG00000235158 | 5.13E-15 | -2.63127 | 1 | 1 AC087430.1    | -      |
| ENSG00000235160 | 5.13E-15 | -2.63127 | 1 | 1 AC009878.2    | -      |
| ENSG00000235163 | 5.13E-15 | -2.63127 | 1 | 1 RP11-410C4.1  | K02936 |
| ENSG00000235165 | 5.13E-15 | -2.63127 | 1 | 1 AC016405.1    | K02090 |
| ENSG00000235166 | 5.13E-15 | -2.63127 | 1 | 1 RP5-1010E17.1 | -      |
| ENSG00000235168 | 5.13E-15 | -2.63127 | 1 | 1 RP1-12G14.5   | -      |
| ENSG00000235170 | 5.13E-15 | -2.63127 | 1 | 1 MTND1P31      | -      |
| ENSG00000235175 | 5.13E-15 | -2.63127 | 1 | 1 RPL26P37      | K02898 |
| ENSG00000235181 | 5.13E-15 | -2.63127 | 1 | 1 AC009892.2    | K06512 |
| ENSG00000235182 | 5.13E-15 | -2.63127 | 1 | 1 RP11-348H3.4  | -      |
| ENSG00000235183 | 5.13E-15 | -2.63127 | 1 | 1 RP11-613C6.4  | K03104 |
| ENSG00000235186 | 5.13E-15 | -2.63127 | 1 | 1 AC103563.7    | -      |
| ENSG00000235189 | 5.13E-15 | -2.63127 | 1 | 1 RP4-537K23.4  | -      |
| ENSG00000235190 | 5.13E-15 | -2.63127 | 1 | 1 RP1-197O17.3  | K12160 |
| ENSG00000235191 | 5.13E-15 | -2.63127 | 1 | 1 NUCB1-AS1     | -      |
| ENSG00000235192 | 5.13E-15 | -2.63127 | 1 | 1 AC009495.2    | -      |
| ENSG00000235193 | 5.13E-15 | -2.63127 | 1 | 1 AC006987.4    | -      |
| ENSG00000235196 | 5.13E-15 | -2.63127 | 1 | 1 RP1-3E10.2    | K09228 |
| ENSG00000235197 | 5.13E-15 | -2.63127 | 1 | 1 ZNF33AP1      | K09228 |
| ENSG00000235198 | 5.13E-15 | -2.63127 | 1 | 1 CTA-109P11.1  | -      |
| ENSG00000235199 | 5.13E-15 | -2.63127 | 1 | 1 CYP2C58P      | -      |
| ENSG00000235200 | 5.13E-15 | -2.63127 | 1 | 1 RP4-763G1.2   | -      |
| ENSG00000235201 | 5.13E-15 | -2.63127 | 1 | 1 RP11-127L21.1 | -      |
| ENSG00000235202 | 5.13E-15 | -2.63127 | 1 | 1 RP11-39H13.1  | -      |
| ENSG00000235203 | 5.13E-15 | -2.63127 | 1 | 1 TBC1D3P3      | K11837 |
| ENSG00000235205 | 5.13E-15 | -2.63127 | 1 | 1 TATDN2P3      | K03424 |
| ENSG00000235207 | 5.13E-15 | -2.63127 | 1 | 1 TUBBP6        | K07375 |
| ENSG00000235208 | 5.13E-15 | -2.63127 | 1 | 1 RPL7AL3       | -      |
| ENSG00000235209 | 5.13E-15 | -2.63127 | 1 | 1 CTA-150C2.13  | -      |
| ENSG00000235211 | 5.13E-15 | -2.63127 | 1 | 1 TMSB10P2      | -      |
| ENSG00000235215 | 5.13E-15 | -2.63127 | 1 | 1 RP11-145M4.2  | -      |
| ENSG00000235218 | 5.13E-15 | -2.63127 | 1 | 1 AC092638.2    | K09537 |
| ENSG00000235219 | 5.13E-15 | -2.63127 | 1 | 1 CTC-233O10.1  | -      |
| ENSG00000235221 | 5.13E-15 | -2.63127 | 1 | 1 LINC00401     | -      |
| ENSG00000235224 | 5.13E-15 | -2.63127 | 1 | 1 RP11-236P24.1 | K02901 |
| ENSG00000235225 | 5.13E-15 | -2.63127 | 1 | 1 AC016712.2    | K02910 |
| ENSG00000235226 | 5.13E-15 | -2.63127 | 1 | 1 RP11-419N10.5 | K02901 |
| ENSG00000235227 | 5.13E-15 | -2.63127 | 1 | 1 VN1R38P       | K04614 |
| ENSG00000235232 | 5.13E-15 | -2.63127 | 1 | 1 MRPS18BP2     | K16174 |
| ENSG00000235235 | 5.13E-15 | -2.63127 | 1 | 1 IGKV1OR-1     | -      |
| ENSG00000235238 | 5.13E-15 | -2.63127 | 1 | 1 SUMO2P1       | K12160 |
| ENSG00000235239 | 5.13E-15 | -2.63127 | 1 | 1 RP1-203C2.4   | -      |
| ENSG00000235240 | 5.13E-15 | -2.63127 | 1 | 1 AC026185.1    | K08789 |
| ENSG00000235241 | 5.13E-15 | -2.63127 | 1 | 1 RP11-108M9.5  | -      |
| ENSG00000235242 | 5.13E-15 | -2.63127 | 1 | 1 AC010982.2    | -      |
| ENSG00000235243 | 5.13E-15 | -2.63127 | 1 | 1 AC093716.1    | K09228 |
| ENSG00000235244 | 5.13E-15 | -2.63127 | 1 | 1 RP11-761E20.1 | -      |
| ENSG00000235246 | 5.13E-15 | -2.63127 | 1 | 1 RP1-5O6.5     | -      |
| ENSG00000235248 | 5.13E-15 | -2.63127 | 1 | 1 OR13C1P       | K04257 |
| ENSG00000235249 | 5.13E-15 | -2.63127 | 1 | 1 OR4F29        | K04257 |
| ENSG00000235251 | 5.13E-15 | -2.63127 | 1 | 1 RP11-384B12.2 | K10685 |
| ENSG00000235253 | 5.13E-15 | -2.63127 | 1 | 1 AC010240.2    | K03231 |
| ENSG00000235256 | 5.13E-15 | -2.63127 | 1 | 1 BX664724.1    | K09571 |
| ENSG00000235258 | 5.13E-15 | -2.63127 | 1 | 1 AC115115.3    | K03960 |
| ENSG00000235261 | 5.13E-15 | -2.63127 | 1 | 1 NICN1-AS1     | -      |
| ENSG00000235262 | 5.13E-15 | -2.63127 | 1 | 1 KDM5C-IT1     | -      |
| ENSG00000235264 | 5.13E-15 | -2.63127 | 1 | 1 RPL5P28       | K02932 |
| ENSG00000235265 | 5.13E-15 | -2.63127 | 1 | 1 LA16c-4G1.5   | -      |

|                 |          |          |   |                 |        |
|-----------------|----------|----------|---|-----------------|--------|
| ENSG00000235266 | 5.13E-15 | -2.63127 | 1 | 1 RP11-753C18.8 | K02891 |
| ENSG00000235267 | 5.13E-15 | -2.63127 | 1 | 1 AC074117.13   | K02957 |
| ENSG00000235268 | 5.13E-15 | -2.63127 | 1 | 1 KDM4E         | K06709 |
| ENSG00000235269 | 5.13E-15 | -2.63127 | 1 | 1 AL162759.1    | -      |
| ENSG00000235271 | 5.13E-15 | -2.63127 | 1 | 1 RP1-90L6.3    | -      |
| ENSG00000235274 | 5.13E-15 | -2.63127 | 1 | 1 RP1-107N3.1   | K10393 |
| ENSG00000235275 | 5.13E-15 | -2.63127 | 1 | 1 KRT18P16      | K07604 |
| ENSG00000235277 | 5.13E-15 | -2.63127 | 1 | 1 AF127577.8    | -      |
| ENSG00000235278 | 5.13E-15 | -2.63127 | 1 | 1 ZNF652P1      | K10518 |
| ENSG00000235279 | 5.13E-15 | -2.63127 | 1 | 1 RP11-539E19.2 | -      |
| ENSG00000235280 | 5.13E-15 | -2.63127 | 1 | 1 MCF2L-AS1     | -      |
| ENSG00000235281 | 5.13E-15 | -2.63127 | 1 | 1 RP11-526P5.2  | -      |
| ENSG00000235282 | 5.13E-15 | -2.63127 | 1 | 1 RP1-8B22.1    | K10418 |
| ENSG00000235283 | 5.13E-15 | -2.63127 | 1 | 1 RP11-395E19.5 | -      |
| ENSG00000235286 | 5.13E-15 | -2.63127 | 1 | 1 AP000925.2    | K07605 |
| ENSG00000235288 | 5.13E-15 | -2.63127 | 1 | 1 RP11-70C1.3   | -      |
| ENSG00000235289 | 5.13E-15 | -2.63127 | 1 | 1 BRD7P6        | -      |
| ENSG00000235290 | 5.13E-15 | -2.63127 | 1 | 1 HLA-W         | K06751 |
| ENSG00000235292 | 5.13E-15 | -2.63127 | 1 | 1 RP4-796I8.1   | -      |
| ENSG00000235293 | 5.13E-15 | -2.63127 | 1 | 1 AC114814.3    | -      |
| ENSG00000235294 | 5.13E-15 | -2.63127 | 1 | 1 RPL7AP25      | K02936 |
| ENSG00000235296 | 5.13E-15 | -2.63127 | 1 | 1 AC137723.5    | -      |
| ENSG00000235299 | 5.13E-15 | -2.63127 | 1 | 1 MRPL53P1      | -      |
| ENSG00000235300 | 5.13E-15 | -2.63127 | 1 | 1 AC090627.1    | -      |
| ENSG00000235301 | 5.13E-15 | -2.63127 | 1 | 1 HLA-Z         | -      |
| ENSG00000235303 | 5.13E-15 | -2.63127 | 1 | 1 RP1-79C4.1    | -      |
| ENSG00000235304 | 5.13E-15 | -2.63127 | 1 | 1 RP11-265P11.2 | -      |
| ENSG00000235306 | 5.13E-15 | -2.63127 | 1 | 1 GAPDHP34      | -      |
| ENSG00000235308 | 5.13E-15 | -2.63127 | 1 | 1 RP11-82K18.2  | -      |
| ENSG00000235310 | 5.13E-15 | -2.63127 | 1 | 1 RP11-250H24.4 | K13676 |
| ENSG00000235312 | 5.13E-15 | -2.63127 | 1 | 1 KRTAP19-10P   | -      |
| ENSG00000235315 | 5.13E-15 | -2.63127 | 1 | 1 RPL23AP69     | K02893 |
| ENSG00000235318 | 5.13E-15 | -2.63127 | 1 | 1 AC005037.6    | K03882 |
| ENSG00000235319 | 5.13E-15 | -2.63127 | 1 | 1 AC012360.4    | -      |
| ENSG00000235323 | 5.13E-15 | -2.63127 | 1 | 1 COTL1P2       | -      |
| ENSG00000235325 | 5.13E-15 | -2.63127 | 1 | 1 AC009963.6    | K12892 |
| ENSG00000235326 | 5.13E-15 | -2.63127 | 1 | 1 RP11-509J21.3 | -      |
| ENSG00000235327 | 5.13E-15 | -2.63127 | 1 | 1 CYP4F61P      | K17730 |
| ENSG00000235329 | 5.13E-15 | -2.63127 | 1 | 1 RP5-1168A5.1  | -      |
| ENSG00000235332 | 5.13E-15 | -2.63127 | 1 | 1 RP11-366O20.5 | K02998 |
| ENSG00000235333 | 5.13E-15 | -2.63127 | 1 | 1 PVRIG2P       | -      |
| ENSG00000235334 | 5.13E-15 | -2.63127 | 1 | 1 RP1-203C2.3   | -      |
| ENSG00000235335 | 5.13E-15 | -2.63127 | 1 | 1 AC016723.4    | -      |
| ENSG00000235337 | 5.13E-15 | -2.63127 | 1 | 1 AC114765.2    | -      |
| ENSG00000235338 | 5.13E-15 | -2.63127 | 1 | 1 DUSP5P2       | K04459 |
| ENSG00000235339 | 5.13E-15 | -2.63127 | 1 | 1 RP11-626A1.1  | K13130 |
| ENSG00000235343 | 5.13E-15 | -2.63127 | 1 | 1 AC005301.8    | -      |
| ENSG00000235347 | 5.13E-15 | -2.63127 | 1 | 1 RP1-37M3.8    | K00974 |
| ENSG00000235349 | 5.13E-15 | -2.63127 | 1 | 1 RP11-561N12.6 | -      |
| ENSG00000235350 | 5.13E-15 | -2.63127 | 1 | 1 AF196972.3    | K15625 |
| ENSG00000235352 | 5.13E-15 | -2.63127 | 1 | 1 AC023128.2    | -      |
| ENSG00000235355 | 5.13E-15 | -2.63127 | 1 | 1 RP11-381O7.4  | -      |
| ENSG00000235356 | 5.13E-15 | -2.63127 | 1 | 1 RP11-428G2.1  | -      |
| ENSG00000235357 | 5.13E-15 | -2.63127 | 1 | 1 RP1-159G19.1  | -      |
| ENSG00000235358 | 5.13E-15 | -2.63127 | 1 | 1 RP11-399E6.1  | -      |
| ENSG00000235361 | 5.13E-15 | -2.63127 | 1 | 1 AC016292.1    | -      |
| ENSG00000235366 | 5.13E-15 | -2.63127 | 1 | 1 LINC01055     | -      |
| ENSG00000235368 | 5.13E-15 | -2.63127 | 1 | 1 RP11-114G11.2 | -      |

|                 |          |          |   |                    |        |
|-----------------|----------|----------|---|--------------------|--------|
| ENSG00000235369 | 5.13E-15 | -2.63127 | 1 | 1 RPL36AP15        | K02929 |
| ENSG00000235370 | 5.13E-15 | -2.63127 | 1 | 1 DNMI1P51         | K08115 |
| ENSG00000235371 | 5.13E-15 | -2.63127 | 1 | 1 RP4-764D2.1      | K01681 |
| ENSG00000235373 | 5.13E-15 | -2.63127 | 1 | 1 RP11-206L10.3    | -      |
| ENSG00000235377 | 5.13E-15 | -2.63127 | 1 | 1 RP11-388B24.4    | K02981 |
| ENSG00000235378 | 5.13E-15 | -2.63127 | 1 | 1 MRPS10P1         | K02946 |
| ENSG00000235379 | 5.13E-15 | -2.63127 | 1 | 1 RPL7P31          | K02937 |
| ENSG00000235382 | 5.13E-15 | -2.63127 | 1 | 1 MTND4P31         | -      |
| ENSG00000235386 | 5.13E-15 | -2.63127 | 1 | 1 RP11-397A15.4    | -      |
| ENSG00000235388 | 5.13E-15 | -2.63127 | 1 | 1 AC018696.7       | -      |
| ENSG00000235389 | 5.13E-15 | -2.63127 | 1 | 1 RP11-134K1.3     | -      |
| ENSG00000235390 | 5.13E-15 | -2.63127 | 1 | 1 CTD-2651B20.5    | K11300 |
| ENSG00000235397 | 5.13E-15 | -2.63127 | 1 | 1 EPN2-AS1         | -      |
| ENSG00000235399 | 5.13E-15 | -2.63127 | 1 | 1 RP11-204P2.3     | -      |
| ENSG00000235400 | 5.13E-15 | -2.63127 | 1 | 1 RP4-641G12.4     | K06063 |
| ENSG00000235403 | 5.13E-15 | -2.63127 | 1 | 1 AC114808.3       | -      |
| ENSG00000235407 | 5.13E-15 | -2.63127 | 1 | 1 RP11-470L19.2    | -      |
| ENSG00000235410 | 5.13E-15 | -2.63127 | 1 | 1 RP11-397C18.2    | -      |
| ENSG00000235412 | 5.13E-15 | -2.63127 | 1 | 1 TTTY4B           | -      |
| ENSG00000235414 | 5.13E-15 | -2.63127 | 1 | 1 AC016737.1       | K02998 |
| ENSG00000235415 | 5.13E-15 | -2.63127 | 1 | 1 AC005808.3       | -      |
| ENSG00000235416 | 5.13E-15 | -2.63127 | 1 | 1 RP3-339A18.3     | K10904 |
| ENSG00000235419 | 5.13E-15 | -2.63127 | 1 | 1 AC010149.4       | -      |
| ENSG00000235420 | 5.13E-15 | -2.63127 | 1 | 1 RPL29P30         | K02905 |
| ENSG00000235421 | 5.13E-15 | -2.63127 | 1 | 1 RP11-667F9.1     | K13141 |
| ENSG00000235424 | 5.13E-15 | -2.63127 | 1 | 1 SUMO2P10         | K12160 |
| ENSG00000235425 | 5.13E-15 | -2.63127 | 1 | 1 RPS7P13          | K02993 |
| ENSG00000235427 | 5.13E-15 | -2.63127 | 1 | 1 AC006159.5       | -      |
| ENSG00000235428 | 5.13E-15 | -2.63127 | 1 | 1 WI2-2998D17.2    | K10486 |
| ENSG00000235429 | 5.13E-15 | -2.63127 | 1 | 1 AC083875.2       | K02957 |
| ENSG00000235430 | 5.13E-15 | -2.63127 | 1 | 1 ZSWIM5P1         | -      |
| ENSG00000235431 | 5.13E-15 | -2.63127 | 1 | 1 AC006373.1       | -      |
| ENSG00000235432 | 5.13E-15 | -2.63127 | 1 | 1 RP5-930J4.5      | -      |
| ENSG00000235433 | 5.13E-15 | -2.63127 | 1 | 1 AC009960.4       | K02126 |
| ENSG00000235434 | 5.13E-15 | -2.63127 | 1 | 1 RP11-91K11.2     | -      |
| ENSG00000235435 | 5.13E-15 | -2.63127 | 1 | 1 AC064865.1       | -      |
| ENSG00000235436 | 5.13E-15 | -2.63127 | 1 | 1 DPY19L2P4        | -      |
| ENSG00000235438 | 5.13E-15 | -2.63127 | 1 | 1 ESRRAP2          | -      |
| ENSG00000235440 | 5.13E-15 | -2.63127 | 1 | 1 RP11-214J9.1     | K02981 |
| ENSG00000235444 | 5.13E-15 | -2.63127 | 1 | 1 PSMB3P2          | K02735 |
| ENSG00000235445 | 5.13E-15 | -2.63127 | 1 | 1 XXbac-B476C20.14 | -      |
| ENSG00000235446 | 5.13E-15 | -2.63127 | 1 | 1 RP11-74K19.1     | -      |
| ENSG00000235447 | 5.13E-15 | -2.63127 | 1 | 1 RP1-279N11.1     | -      |
| ENSG00000235449 | 5.13E-15 | -2.63127 | 1 | 1 RP11-480I12.2    | K02272 |
| ENSG00000235450 | 5.13E-15 | -2.63127 | 1 | 1 RP11-142A5.1     | -      |
| ENSG00000235451 | 5.13E-15 | -2.63127 | 1 | 1 PNPLA4P1         | -      |
| ENSG00000235455 | 5.13E-15 | -2.63127 | 1 | 1 IQCF5-AS1        | -      |
| ENSG00000235459 | 5.13E-15 | -2.63127 | 1 | 1 RPS26P31         | K02976 |
| ENSG00000235461 | 5.13E-15 | -2.63127 | 1 | 1 RP5-928E24.2     | -      |
| ENSG00000235462 | 5.13E-15 | -2.63127 | 1 | 1 TAB3P1           | K12793 |
| ENSG00000235463 | 5.13E-15 | -2.63127 | 1 | 1 AC078974.2       | -      |
| ENSG00000235464 | 5.13E-15 | -2.63127 | 1 | 1 AC007652.1       | -      |
| ENSG00000235467 | 5.13E-15 | -2.63127 | 1 | 1 RP11-513D4.2     | K02865 |
| ENSG00000235469 | 5.13E-15 | -2.63127 | 1 | 1 MRPL50P4         | K17431 |
| ENSG00000235470 | 5.13E-15 | -2.63127 | 1 | 1 RP11-225H22.5    | -      |
| ENSG00000235472 | 5.13E-15 | -2.63127 | 1 | 1 EIF4A1P7         | K03257 |
| ENSG00000235476 | 5.13E-15 | -2.63127 | 1 | 1 AF254982.2       | -      |
| ENSG00000235478 | 5.13E-15 | -2.63127 | 1 | 1 AC006946.15      | -      |

|                 |          |          |   |                  |        |
|-----------------|----------|----------|---|------------------|--------|
| ENSG00000235479 | 5.13E-15 | -2.63127 | 1 | 1 RAB9AP4        | K07899 |
| ENSG00000235481 | 5.13E-15 | -2.63127 | 1 | 1 RP11-133O22.6  | -      |
| ENSG00000235482 | 5.13E-15 | -2.63127 | 1 | 1 RPL21P135      | K02889 |
| ENSG00000235483 | 5.13E-15 | -2.63127 | 1 | 1 GYG2-AS1       | -      |
| ENSG00000235485 | 5.13E-15 | -2.63127 | 1 | 1 RP1-101G11.2   | K01681 |
| ENSG00000235486 | 5.13E-15 | -2.63127 | 1 | 1 AC114755.7     | K03348 |
| ENSG00000235491 | 5.13E-15 | -2.63127 | 1 | 1 AC097499.1     | -      |
| ENSG00000235492 | 5.13E-15 | -2.63127 | 1 | 1 RP11-16L9.4    | -      |
| ENSG00000235493 | 5.13E-15 | -2.63127 | 1 | 1 AC092415.1     | -      |
| ENSG00000235494 | 5.13E-15 | -2.63127 | 1 | 1 RP11-498P14.4  | -      |
| ENSG00000235495 | 5.13E-15 | -2.63127 | 1 | 1 AC010987.5     | -      |
| ENSG00000235496 | 5.13E-15 | -2.63127 | 1 | 1 RP11-101E5.2   | -      |
| ENSG00000235497 | 5.13E-15 | -2.63127 | 1 | 1 AC012506.4     | -      |
| ENSG00000235500 | 5.13E-15 | -2.63127 | 1 | 1 SNX19P2        | K17930 |
| ENSG00000235501 | 5.13E-15 | -2.63127 | 1 | 1 RP4-639F20.1   | -      |
| ENSG00000235503 | 5.13E-15 | -2.63127 | 1 | 1 AC079799.2     | -      |
| ENSG00000235504 | 5.13E-15 | -2.63127 | 1 | 1 RP3-453D15.1   | -      |
| ENSG00000235505 | 5.13E-15 | -2.63127 | 1 | 1 RP11-693N9.2   | K04394 |
| ENSG00000235506 | 5.13E-15 | -2.63127 | 1 | 1 SLC20A1P2      | -      |
| ENSG00000235508 | 5.13E-15 | -2.63127 | 1 | 1 RPS2P7         | K02981 |
| ENSG00000235510 | 5.13E-15 | -2.63127 | 1 | 1 BX842568.1     | -      |
| ENSG00000235511 | 5.13E-15 | -2.63127 | 1 | 1 OFD1P18Y       | K16480 |
| ENSG00000235512 | 5.13E-15 | -2.63127 | 1 | 1 TAB3-AS2       | -      |
| ENSG00000235514 | 5.13E-15 | -2.63127 | 1 | 1 AP000226.9     | -      |
| ENSG00000235518 | 5.13E-15 | -2.63127 | 1 | 1 AC011196.3     | -      |
| ENSG00000235519 | 5.13E-15 | -2.63127 | 1 | 1 AC012075.2     | -      |
| ENSG00000235521 | 5.13E-15 | -2.63127 | 1 | 1 USP9YP27       | -      |
| ENSG00000235522 | 5.13E-15 | -2.63127 | 1 | 1 AC009505.2     | -      |
| ENSG00000235524 | 5.13E-15 | -2.63127 | 1 | 1 RP11-343J3.5   | K02256 |
| ENSG00000235525 | 5.13E-15 | -2.63127 | 1 | 1 FTLP1          | K13625 |
| ENSG00000235526 | 5.13E-15 | -2.63127 | 1 | 1 RP5-1028L10.2  | -      |
| ENSG00000235532 | 5.13E-15 | -2.63127 | 1 | 1 LINC00402      | -      |
| ENSG00000235533 | 5.13E-15 | -2.63127 | 1 | 1 RP11-284P20.3  | -      |
| ENSG00000235534 | 5.13E-15 | -2.63127 | 1 | 1 FECHP1         | K01772 |
| ENSG00000235535 | 5.13E-15 | -2.63127 | 1 | 1 RP11-532N4.2   | -      |
| ENSG00000235537 | 5.13E-15 | -2.63127 | 1 | 1 AC009411.2     | -      |
| ENSG00000235538 | 5.13E-15 | -2.63127 | 1 | 1 RP1-230L10.1   | -      |
| ENSG00000235539 | 5.13E-15 | -2.63127 | 1 | 1 MTND1P33       | -      |
| ENSG00000235544 | 5.13E-15 | -2.63127 | 1 | 1 RPS11P1        | K02949 |
| ENSG00000235546 | 5.13E-15 | -2.63127 | 1 | 1 AC087499.5     | -      |
| ENSG00000235547 | 5.13E-15 | -2.63127 | 1 | 1 NDUFB11P1      | K11351 |
| ENSG00000235548 | 5.13E-15 | -2.63127 | 1 | 1 AC073551.1     | K09488 |
| ENSG00000235549 | 5.13E-15 | -2.63127 | 1 | 1 RP11-781D11.1  | K03113 |
| ENSG00000235550 | 5.13E-15 | -2.63127 | 1 | 1 ANKRD26P2      | -      |
| ENSG00000235555 | 5.13E-15 | -2.63127 | 1 | 1 SUMO1P4        | K12160 |
| ENSG00000235558 | 5.13E-15 | -2.63127 | 1 | 1 RP11-1198D22.1 | K01195 |
| ENSG00000235559 | 5.13E-15 | -2.63127 | 1 | 1 NOL5BP         | K14564 |
| ENSG00000235563 | 5.13E-15 | -2.63127 | 1 | 1 RP11-334A14.8  | -      |
| ENSG00000235564 | 5.13E-15 | -2.63127 | 1 | 1 AP000477.2     | -      |
| ENSG00000235566 | 5.13E-15 | -2.63127 | 1 | 1 RP11-435B5.7   | -      |
| ENSG00000235570 | 5.13E-15 | -2.63127 | 1 | 1 LINC00533      | -      |
| ENSG00000235571 | 5.13E-15 | -2.63127 | 1 | 1 SNX18P14       | K17299 |
| ENSG00000235572 | 5.13E-15 | -2.63127 | 1 | 1 RP11-555H7.2   | -      |
| ENSG00000235573 | 5.13E-15 | -2.63127 | 1 | 1 RP3-412A9.12   | K02957 |
| ENSG00000235575 | 5.13E-15 | -2.63127 | 1 | 1 RP4-800F24.1   | -      |
| ENSG00000235576 | 5.13E-15 | -2.63127 | 1 | 1 AC092580.4     | -      |
| ENSG00000235578 | 5.13E-15 | -2.63127 | 1 | 1 XXbac-B33L19.4 | -      |
| ENSG00000235579 | 5.13E-15 | -2.63127 | 1 | 1 AC007283.4     | K02923 |

|                 |          |          |   |                    |        |
|-----------------|----------|----------|---|--------------------|--------|
| ENSG00000235581 | 5.13E-15 | -2.63127 | 1 | 1 GS1-111G14.1     | K02979 |
| ENSG00000235582 | 5.13E-15 | -2.63127 | 1 | 1 RP11-448G4.2     | K02896 |
| ENSG00000235583 | 5.13E-15 | -2.63127 | 1 | 1 AC007562.1       | K10582 |
| ENSG00000235584 | 5.13E-15 | -2.63127 | 1 | 1 AC008268.1       | -      |
| ENSG00000235587 | 5.13E-15 | -2.63127 | 1 | 1 GAPDHP65         | K00134 |
| ENSG00000235592 | 5.13E-15 | -2.63127 | 1 | 1 GS1-600G8.4      | -      |
| ENSG00000235593 | 5.13E-15 | -2.63127 | 1 | 1 RBMS3-AS1        | -      |
| ENSG00000235594 | 5.13E-15 | -2.63127 | 1 | 1 RP11-380D15.2    | -      |
| ENSG00000235595 | 5.13E-15 | -2.63127 | 1 | 1 GAPDHP23         | K00134 |
| ENSG00000235597 | 5.13E-15 | -2.63127 | 1 | 1 LINC01102        | -      |
| ENSG00000235598 | 5.13E-15 | -2.63127 | 1 | 1 RRM2P4           | K10808 |
| ENSG00000235602 | 5.13E-15 | -2.63127 | 1 | 1 POU5F1P3         | K09367 |
| ENSG00000235604 | 5.13E-15 | -2.63127 | 1 | 1 SPANXB1          | -      |
| ENSG00000235606 | 5.13E-15 | -2.63127 | 1 | 1 AK4P6            | K00939 |
| ENSG00000235608 | 5.13E-15 | -2.63127 | 1 | 1 NKX1-1           | K09309 |
| ENSG00000235610 | 5.13E-15 | -2.63127 | 1 | 1 AC013448.2       | -      |
| ENSG00000235612 | 5.13E-15 | -2.63127 | 1 | 1 RP1-158P9.1      | -      |
| ENSG00000235615 | 5.13E-15 | -2.63127 | 1 | 1 AJ239322.1       | -      |
| ENSG00000235616 | 5.13E-15 | -2.63127 | 1 | 1 ST13P2           | K09560 |
| ENSG00000235617 | 5.13E-15 | -2.63127 | 1 | 1 XXbac-B476C20.10 | K07377 |
| ENSG00000235618 | 5.13E-15 | -2.63127 | 1 | 1 RP11-324H6.5     | K18462 |
| ENSG00000235619 | 5.13E-15 | -2.63127 | 1 | 1 RPL36AP33        | K02929 |
| ENSG00000235620 | 5.13E-15 | -2.63127 | 1 | 1 AC020743.4       | -      |
| ENSG00000235621 | 5.13E-15 | -2.63127 | 1 | 1 LINC00494        | -      |
| ENSG00000235623 | 5.13E-15 | -2.63127 | 1 | 1 OR7E110P         | K04257 |
| ENSG00000235625 | 5.13E-15 | -2.63127 | 1 | 1 RP11-203P2.2     | -      |
| ENSG00000235626 | 5.13E-15 | -2.63127 | 1 | 1 KRT18P66         | K07604 |
| ENSG00000235627 | 5.13E-15 | -2.63127 | 1 | 1 SNRPP4           | -      |
| ENSG00000235628 | 5.13E-15 | -2.63127 | 1 | 1 TNR-IT1          | -      |
| ENSG00000235629 | 5.13E-15 | -2.63127 | 1 | 1 AC090952.5       | -      |
| ENSG00000235631 | 5.13E-15 | -2.63127 | 1 | 1 RNF148           | -      |
| ENSG00000235635 | 5.13E-15 | -2.63127 | 1 | 1 AC016644.1       | -      |
| ENSG00000235637 | 5.13E-15 | -2.63127 | 1 | 1 RP11-457D2.3     | -      |
| ENSG00000235638 | 5.13E-15 | -2.63127 | 1 | 1 MTND6P14         | -      |
| ENSG00000235639 | 5.13E-15 | -2.63127 | 1 | 1 AC002069.6       | -      |
| ENSG00000235640 | 5.13E-15 | -2.63127 | 1 | 1 AC092646.1       | K15076 |
| ENSG00000235641 | 5.13E-15 | -2.63127 | 1 | 1 LINC00484        | -      |
| ENSG00000235642 | 5.13E-15 | -2.63127 | 1 | 1 PTP4A1P5         | K18041 |
| ENSG00000235644 | 5.13E-15 | -2.63127 | 1 | 1 AC010095.7       | K02866 |
| ENSG00000235645 | 5.13E-15 | -2.63127 | 1 | 1 RP11-242G20.1    | -      |
| ENSG00000235646 | 5.13E-15 | -2.63127 | 1 | 1 MTND1P2          | K03878 |
| ENSG00000235647 | 5.13E-15 | -2.63127 | 1 | 1 RP1-172B20.6     | -      |
| ENSG00000235649 | 5.13E-15 | -2.63127 | 1 | 1 MXRA5P1          | -      |
| ENSG00000235653 | 5.13E-15 | -2.63127 | 1 | 1 AC007253.1       | K09228 |
| ENSG00000235656 | 5.13E-15 | -2.63127 | 1 | 1 RPL36P18         | K02920 |
| ENSG00000235659 | 5.13E-15 | -2.63127 | 1 | 1 RP11-374M1.5     | -      |
| ENSG00000235661 | 5.13E-15 | -2.63127 | 1 | 1 MIR670HG         | -      |
| ENSG00000235663 | 5.13E-15 | -2.63127 | 1 | 1 SAPCD1-AS1       | -      |
| ENSG00000235665 | 5.13E-15 | -2.63127 | 1 | 1 LINC00298        | -      |
| ENSG00000235669 | 5.13E-15 | -2.63127 | 1 | 1 AC004593.3       | -      |
| ENSG00000235672 | 5.13E-15 | -2.63127 | 1 | 1 AC090286.2       | K15306 |
| ENSG00000235673 | 5.13E-15 | -2.63127 | 1 | 1 RP11-109P14.8    | K02981 |
| ENSG00000235675 | 5.13E-15 | -2.63127 | 1 | 1 AC151961.1       | -      |
| ENSG00000235678 | 5.13E-15 | -2.63127 | 1 | 1 OR5AN2P          | K04257 |
| ENSG00000235679 | 5.13E-15 | -2.63127 | 1 | 1 RP11-449I17.9    | K11644 |
| ENSG00000235681 | 5.13E-15 | -2.63127 | 1 | 1 AC008746.5       | -      |
| ENSG00000235683 | 5.13E-15 | -2.63127 | 1 | 1 AC018442.1       | K17800 |
| ENSG00000235685 | 5.13E-15 | -2.63127 | 1 | 1 RP11-126D17.1    | K02969 |

|                 |          |          |   |                   |        |
|-----------------|----------|----------|---|-------------------|--------|
| ENSG00000235686 | 5.13E-15 | -2.63127 | 1 | 1 PPIAP20         | K03767 |
| ENSG00000235687 | 5.13E-15 | -2.63127 | 1 | 1 LINC00993       | -      |
| ENSG00000235688 | 5.13E-15 | -2.63127 | 1 | 1 AC116614.1      | -      |
| ENSG00000235689 | 5.13E-15 | -2.63127 | 1 | 1 AP000351.13     | -      |
| ENSG00000235690 | 5.13E-15 | -2.63127 | 1 | 1 CUBNP3          | K14616 |
| ENSG00000235691 | 5.13E-15 | -2.63127 | 1 | 1 AC006987.5      | -      |
| ENSG00000235695 | 5.13E-15 | -2.63127 | 1 | 1 RP11-395P16.1   | -      |
| ENSG00000235699 | 5.13E-15 | -2.63127 | 1 | 1 CXorf51B        | -      |
| ENSG00000235702 | 5.13E-15 | -2.63127 | 1 | 1 WI2-925H4.1     | -      |
| ENSG00000235705 | 5.13E-15 | -2.63127 | 1 | 1 AL133481.1      | K01896 |
| ENSG00000235707 | 5.13E-15 | -2.63127 | 1 | 1 RP11-323A7.1    | -      |
| ENSG00000235710 | 5.13E-15 | -2.63127 | 1 | 1 RP5-1097F14.3   | -      |
| ENSG00000235711 | 5.13E-15 | -2.63127 | 1 | 1 ANKRD34C        | -      |
| ENSG00000235713 | 5.13E-15 | -2.63127 | 1 | 1 RP4-604G5.3     | K07628 |
| ENSG00000235716 | 5.13E-15 | -2.63127 | 1 | 1 KRT18P46        | K07604 |
| ENSG00000235717 | 5.13E-15 | -2.63127 | 1 | 1 DPP10-AS2       | -      |
| ENSG00000235718 | 5.13E-15 | -2.63127 | 1 | 1 MFRP            | -      |
| ENSG00000235719 | 5.13E-15 | -2.63127 | 1 | 1 AC010141.1      | -      |
| ENSG00000235725 | 5.13E-15 | -2.63127 | 1 | 1 AC007389.3      | -      |
| ENSG00000235726 | 5.13E-15 | -2.63127 | 1 | 1 AC010148.1      | -      |
| ENSG00000235728 | 5.13E-15 | -2.63127 | 1 | 1 AC007349.5      | -      |
| ENSG00000235729 | 5.13E-15 | -2.63127 | 1 | 1 RP11-29O6.2     | K02993 |
| ENSG00000235730 | 5.13E-15 | -2.63127 | 1 | 1 OR2AF1P         | K04257 |
| ENSG00000235731 | 5.13E-15 | -2.63127 | 1 | 1 AC124997.1      | -      |
| ENSG00000235735 | 5.13E-15 | -2.63127 | 1 | 1 RPL7AP72        | -      |
| ENSG00000235736 | 5.13E-15 | -2.63127 | 1 | 1 RP1-10C16.1     | -      |
| ENSG00000235737 | 5.13E-15 | -2.63127 | 1 | 1 TRIM60P19       | -      |
| ENSG00000235738 | 5.13E-15 | -2.63127 | 1 | 1 RP11-419M24.2   | -      |
| ENSG00000235741 | 5.13E-15 | -2.63127 | 1 | 1 RP5-866L20.1    | -      |
| ENSG00000235742 | 5.13E-15 | -2.63127 | 1 | 1 RP11-5G18.2     | -      |
| ENSG00000235743 | 5.13E-15 | -2.63127 | 1 | 1 RP11-439H9.1    | -      |
| ENSG00000235749 | 5.13E-15 | -2.63127 | 1 | 1 RP11-634B7.4    | -      |
| ENSG00000235751 | 5.13E-15 | -2.63127 | 1 | 1 MAGI2-IT1       | -      |
| ENSG00000235756 | 5.13E-15 | -2.63127 | 1 | 1 RP11-339A11.1   | K13199 |
| ENSG00000235759 | 5.13E-15 | -2.63127 | 1 | 1 ARHGAP42P3      | -      |
| ENSG00000235761 | 5.13E-15 | -2.63127 | 1 | 1 RP11-293G6__B.2 | K02262 |
| ENSG00000235763 | 5.13E-15 | -2.63127 | 1 | 1 SNRPGP5         | K11099 |
| ENSG00000235768 | 5.13E-15 | -2.63127 | 1 | 1 BRD7P5          | K11723 |
| ENSG00000235770 | 5.13E-15 | -2.63127 | 1 | 1 LINC00607       | -      |
| ENSG00000235775 | 5.13E-15 | -2.63127 | 1 | 1 AC063976.2      | -      |
| ENSG00000235777 | 5.13E-15 | -2.63127 | 1 | 1 DPYD-AS2        | -      |
| ENSG00000235778 | 5.13E-15 | -2.63127 | 1 | 1 AC130360.8      | K11845 |
| ENSG00000235779 | 5.13E-15 | -2.63127 | 1 | 1 AC079779.5      | -      |
| ENSG00000235780 | 5.13E-15 | -2.63127 | 1 | 1 USP17L27        | K11845 |
| ENSG00000235781 | 5.13E-15 | -2.63127 | 1 | 1 XXbac-BPG249D20 | -      |
| ENSG00000235782 | 5.13E-15 | -2.63127 | 1 | 1 RP3-333A15.1    | -      |
| ENSG00000235784 | 5.13E-15 | -2.63127 | 1 | 1 HNRNPA1P29      | K12741 |
| ENSG00000235785 | 5.13E-15 | -2.63127 | 1 | 1 AL109767.1      | -      |
| ENSG00000235787 | 5.13E-15 | -2.63127 | 1 | 1 RP11-219I21.1   | K02917 |
| ENSG00000235794 | 5.13E-15 | -2.63127 | 1 | 1 RP5-837O21.6    | -      |
| ENSG00000235797 | 5.13E-15 | -2.63127 | 1 | 1 RP11-402G3.6    | K18584 |
| ENSG00000235802 | 5.13E-15 | -2.63127 | 1 | 1 HCFC1-AS1       | -      |
| ENSG00000235803 | 5.13E-15 | -2.63127 | 1 | 1 RP11-343J3.6    | K02261 |
| ENSG00000235804 | 5.13E-15 | -2.63127 | 1 | 1 RP4-535B20.2    | K02974 |
| ENSG00000235805 | 5.13E-15 | -2.63127 | 1 | 1 SOCS5P3         | K04698 |
| ENSG00000235808 | 5.13E-15 | -2.63127 | 1 | 1 MYL6P2          | K12751 |
| ENSG00000235810 | 5.13E-15 | -2.63127 | 1 | 1 RP11-550A9.1    | -      |
| ENSG00000235811 | 5.13E-15 | -2.63127 | 1 | 1 RP11-510N19.3   | K02153 |

|                 |          |          |   |                 |        |
|-----------------|----------|----------|---|-----------------|--------|
| ENSG00000235812 | 5.13E-15 | -2.63127 | 1 | 1 ADAM21P1      | K08610 |
| ENSG00000235813 | 5.13E-15 | -2.63127 | 1 | 1 RP11-308B5.2  | -      |
| ENSG00000235815 | 5.13E-15 | -2.63127 | 1 | 1 RP1-125N5.2   | -      |
| ENSG00000235816 | 5.13E-15 | -2.63127 | 1 | 1 PRELID1P3     | -      |
| ENSG00000235817 | 5.13E-15 | -2.63127 | 1 | 1 RP11-543E8.2  | K02974 |
| ENSG00000235818 | 5.13E-15 | -2.63127 | 1 | 1 VN1R17P       | K04614 |
| ENSG00000235819 | 5.13E-15 | -2.63127 | 1 | 1 RP11-359J6.1  | -      |
| ENSG00000235820 | 5.13E-15 | -2.63127 | 1 | 1 RP5-1022P6.5  | -      |
| ENSG00000235821 | 5.13E-15 | -2.63127 | 1 | 1 IFITM4P       | K06566 |
| ENSG00000235822 | 5.13E-15 | -2.63127 | 1 | 1 LINC01073     | -      |
| ENSG00000235824 | 5.13E-15 | -2.63127 | 1 | 1 LINC00837     | -      |
| ENSG00000235825 | 5.13E-15 | -2.63127 | 1 | 1 FAM90A9P      | -      |
| ENSG00000235827 | 5.13E-15 | -2.63127 | 1 | 1 TUBB8P9       | K07375 |
| ENSG00000235828 | 5.13E-15 | -2.63127 | 1 | 1 RPL36AP26     | K02929 |
| ENSG00000235829 | 5.13E-15 | -2.63127 | 1 | 1 TBCAP2        | K17292 |
| ENSG00000235830 | 5.13E-15 | -2.63127 | 1 | 1 SRGAP3-AS4    | -      |
| ENSG00000235832 | 5.13E-15 | -2.63127 | 1 | 1 CNN2P3        | -      |
| ENSG00000235833 | 5.13E-15 | -2.63127 | 1 | 1 AC159540.14   | -      |
| ENSG00000235836 | 5.13E-15 | -2.63127 | 1 | 1 AC124944.4    | K10394 |
| ENSG00000235838 | 5.13E-15 | -2.63127 | 1 | 1 HSP90AB7P     | K04079 |
| ENSG00000235845 | 5.13E-15 | -2.63127 | 1 | 1 RP11-272D20.2 | -      |
| ENSG00000235849 | 5.13E-15 | -2.63127 | 1 | 1 HS6ST2-AS1    | -      |
| ENSG00000235855 | 5.13E-15 | -2.63127 | 1 | 1 RP11-655M14.6 | K04257 |
| ENSG00000235857 | 5.13E-15 | -2.63127 | 1 | 1 CTBP2P1       | K04496 |
| ENSG00000235858 | 5.13E-15 | -2.63127 | 1 | 1 RP11-36D19.8  | -      |
| ENSG00000235863 | 5.13E-15 | -2.63127 | 1 | 1 B3GALT4       | K00715 |
| ENSG00000235864 | 5.13E-15 | -2.63127 | 1 | 1 HSPA8P6       | K03283 |
| ENSG00000235868 | 5.13E-15 | -2.63127 | 1 | 1 GAPDHP31      | K00134 |
| ENSG00000235869 | 5.13E-15 | -2.63127 | 1 | 1 RP1-102G20.4  | K02976 |
| ENSG00000235871 | 5.13E-15 | -2.63127 | 1 | 1 AC062016.3    | -      |
| ENSG00000235872 | 5.13E-15 | -2.63127 | 1 | 1 RP11-335O4.3  | -      |
| ENSG00000235875 | 5.13E-15 | -2.63127 | 1 | 1 ARHGEF7-AS2   | -      |
| ENSG00000235876 | 5.13E-15 | -2.63127 | 1 | 1 FEM1AP4       | -      |
| ENSG00000235879 | 5.13E-15 | -2.63127 | 1 | 1 FAR1P1        | K13356 |
| ENSG00000235880 | 5.13E-15 | -2.63127 | 1 | 1 RP11-59O6.3   | -      |
| ENSG00000235881 | 5.13E-15 | -2.63127 | 1 | 1 AC114776.3    | -      |
| ENSG00000235883 | 5.13E-15 | -2.63127 | 1 | 1 AC012379.1    | K17449 |
| ENSG00000235886 | 5.13E-15 | -2.63127 | 1 | 1 RP4-672N11.1  | -      |
| ENSG00000235887 | 5.13E-15 | -2.63127 | 1 | 1 RP11-763B22.6 | -      |
| ENSG00000235890 | 5.13E-15 | -2.63127 | 1 | 1 TSPEAR-AS1    | -      |
| ENSG00000235892 | 5.13E-15 | -2.63127 | 1 | 1 PKMP2         | K00873 |
| ENSG00000235893 | 5.13E-15 | -2.63127 | 1 | 1 RP11-460E7.8  | -      |
| ENSG00000235895 | 5.13E-15 | -2.63127 | 1 | 1 AC010154.2    | K12885 |
| ENSG00000235896 | 5.13E-15 | -2.63127 | 1 | 1 IGKV3D-7      | -      |
| ENSG00000235899 | 5.13E-15 | -2.63127 | 1 | 1 RP11-345L23.1 | -      |
| ENSG00000235901 | 5.13E-15 | -2.63127 | 1 | 1 RP11-342F21.1 | -      |
| ENSG00000235902 | 5.13E-15 | -2.63127 | 1 | 1 RP11-626E13.1 | -      |
| ENSG00000235910 | 5.13E-15 | -2.63127 | 1 | 1 APOA1-AS      | -      |
| ENSG00000235911 | 5.13E-15 | -2.63127 | 1 | 1 AC019055.1    | -      |
| ENSG00000235914 | 5.13E-15 | -2.63127 | 1 | 1 MACROD2-AS1   | -      |
| ENSG00000235916 | 5.13E-15 | -2.63127 | 1 | 1 RP13-444K19.1 | K02963 |
| ENSG00000235917 | 5.13E-15 | -2.63127 | 1 | 1 RP11-39K24.14 | -      |
| ENSG00000235920 | 5.13E-15 | -2.63127 | 1 | 1 AC073109.2    | K13112 |
| ENSG00000235922 | 5.13E-15 | -2.63127 | 1 | 1 RP11-323C15.1 | -      |
| ENSG00000235924 | 5.13E-15 | -2.63127 | 1 | 1 ZNRF2P3       | -      |
| ENSG00000235926 | 5.13E-15 | -2.63127 | 1 | 1 RP13-650G11.1 | -      |
| ENSG00000235929 | 5.13E-15 | -2.63127 | 1 | 1 TPT1P14       | -      |
| ENSG00000235930 | 5.13E-15 | -2.63127 | 1 | 1 HSPE1P12      | K04078 |

|                 |          |          |   |                    |        |
|-----------------|----------|----------|---|--------------------|--------|
| ENSG00000235931 | 5.13E-15 | -2.63127 | 1 | 1 C10orf40         | -      |
| ENSG00000235932 | 5.13E-15 | -2.63127 | 1 | 1 RP11-250H24.6    | K12019 |
| ENSG00000235933 | 5.13E-15 | -2.63127 | 1 | 1 RP5-1185H19.2    | -      |
| ENSG00000235934 | 5.13E-15 | -2.63127 | 1 | 1 AC007405.8       | -      |
| ENSG00000235937 | 5.13E-15 | -2.63127 | 1 | 1 AC008280.1       | K02889 |
| ENSG00000235938 | 5.13E-15 | -2.63127 | 1 | 1 RP11-157L3.4     | -      |
| ENSG00000235939 | 5.13E-15 | -2.63127 | 1 | 1 RP11-123B3.2     | -      |
| ENSG00000235942 | 5.13E-15 | -2.63127 | 1 | 1 LCE6A            | -      |
| ENSG00000235943 | 5.13E-15 | -2.63127 | 1 | 1 TMEM212-IT1      | -      |
| ENSG00000235945 | 5.13E-15 | -2.63127 | 1 | 1 AC002543.2       | -      |
| ENSG00000235946 | 5.13E-15 | -2.63127 | 1 | 1 LL0XNC01-240C2.1 | K11252 |
| ENSG00000235949 | 5.13E-15 | -2.63127 | 1 | 1 AC061961.2       | -      |
| ENSG00000235950 | 5.13E-15 | -2.63127 | 1 | 1 DUX4L15          | -      |
| ENSG00000235951 | 5.13E-15 | -2.63127 | 1 | 1 AC009965.1       | -      |
| ENSG00000235955 | 5.13E-15 | -2.63127 | 1 | 1 C1CP20           | K16941 |
| ENSG00000235959 | 5.13E-15 | -2.63127 | 1 | 1 AC009237.17      | -      |
| ENSG00000235961 | 5.13E-15 | -2.63127 | 1 | 1 PNMA6C           | -      |
| ENSG00000235962 | 5.13E-15 | -2.63127 | 1 | 1 RP11-462L8.2     | K02936 |
| ENSG00000235963 | 5.13E-15 | -2.63127 | 1 | 1 MCCD1P1          | -      |
| ENSG00000235964 | 5.13E-15 | -2.63127 | 1 | 1 FXYD6P2          | K13363 |
| ENSG00000235965 | 5.13E-15 | -2.63127 | 1 | 1 AP000431.1       | -      |
| ENSG00000235967 | 5.13E-15 | -2.63127 | 1 | 1 COX5BP3          | -      |
| ENSG00000235968 | 5.13E-15 | -2.63127 | 1 | 1 AC079112.1       | K10278 |
| ENSG00000235969 | 5.13E-15 | -2.63127 | 1 | 1 CHEK2P4          | K06641 |
| ENSG00000235972 | 5.13E-15 | -2.63127 | 1 | 1 RP11-472G23.10   | -      |
| ENSG00000235974 | 5.13E-15 | -2.63127 | 1 | 1 VN2R19P          | -      |
| ENSG00000235975 | 5.13E-15 | -2.63127 | 1 | 1 RP1-106C24.1     | -      |
| ENSG00000235976 | 5.13E-15 | -2.63127 | 1 | 1 RP1-197J16.1     | -      |
| ENSG00000235979 | 5.13E-15 | -2.63127 | 1 | 1 AC004448.5       | -      |
| ENSG00000235981 | 5.13E-15 | -2.63127 | 1 | 1 AC023274.4       | K10582 |
| ENSG00000235982 | 5.13E-15 | -2.63127 | 1 | 1 AC007875.3       | K05725 |
| ENSG00000235984 | 5.13E-15 | -2.63127 | 1 | 1 GPC5-AS1         | -      |
| ENSG00000235988 | 5.13E-15 | -2.63127 | 1 | 1 RP11-495P10.4    | -      |
| ENSG00000235991 | 5.13E-15 | -2.63127 | 1 | 1 RP11-143H17.1    | -      |
| ENSG00000235992 | 5.13E-15 | -2.63127 | 1 | 1 GRAMD4P2         | -      |
| ENSG00000235993 | 5.13E-15 | -2.63127 | 1 | 1 AC007559.1       | -      |
| ENSG00000235994 | 5.13E-15 | -2.63127 | 1 | 1 RP3-470B24.5     | -      |
| ENSG00000235995 | 5.13E-15 | -2.63127 | 1 | 1 UBE2V1P6         | K10704 |
| ENSG00000235996 | 5.13E-15 | -2.63127 | 1 | 1 RP11-97N19.2     | -      |
| ENSG00000235997 | 5.13E-15 | -2.63127 | 1 | 1 AC109642.1       | -      |
| ENSG00000235998 | 5.13E-15 | -2.63127 | 1 | 1 TAAR7P           | -      |
| ENSG00000235999 | 5.13E-15 | -2.63127 | 1 | 1 RP11-403I13.8    | -      |
| ENSG00000236002 | 5.13E-15 | -2.63127 | 1 | 1 CTB-75G16.1      | K02981 |
| ENSG00000236003 | 5.13E-15 | -2.63127 | 1 | 1 AC007050.17      | -      |
| ENSG00000236004 | 5.13E-15 | -2.63127 | 1 | 1 RP4-800M22.4     | K02940 |
| ENSG00000236005 | 5.13E-15 | -2.63127 | 1 | 1 RP11-438P9.1     | K02960 |
| ENSG00000236007 | 5.13E-15 | -2.63127 | 1 | 1 AC105921.5       | K02256 |
| ENSG00000236009 | 5.13E-15 | -2.63127 | 1 | 1 RP11-293F5.1     | -      |
| ENSG00000236012 | 5.13E-15 | -2.63127 | 1 | 1 HIGD1AP12        | -      |
| ENSG00000236016 | 5.13E-15 | -2.63127 | 1 | 1 RP1-3J17.3       | -      |
| ENSG00000236021 | 5.13E-15 | -2.63127 | 1 | 1 RP11-195C7.1     | -      |
| ENSG00000236025 | 5.13E-15 | -2.63127 | 1 | 1 RP11-463J7.1     | -      |
| ENSG00000236026 | 5.13E-15 | -2.63127 | 1 | 1 AC009237.14      | K12019 |
| ENSG00000236027 | 5.13E-15 | -2.63127 | 1 | 1 PATE3            | -      |
| ENSG00000236028 | 5.13E-15 | -2.63127 | 1 | 1 RP11-323C15.2    | -      |
| ENSG00000236029 | 5.13E-15 | -2.63127 | 1 | 1 AL953854.2       | -      |
| ENSG00000236030 | 5.13E-15 | -2.63127 | 1 | 1 LINC01036        | -      |
| ENSG00000236031 | 5.13E-15 | -2.63127 | 1 | 1 RP11-269F20.1    | -      |



|                 |          |          |   |                     |        |
|-----------------|----------|----------|---|---------------------|--------|
| ENSG00000236032 | 5.13E-15 | -2.63127 | 1 | 1 OR5H14            | K04257 |
| ENSG00000236035 | 5.13E-15 | -2.63127 | 1 | 1 RP11-90O23.1      | K14842 |
| ENSG00000236036 | 5.13E-15 | -2.63127 | 1 | 1 LINC00445         | -      |
| ENSG00000236039 | 5.13E-15 | -2.63127 | 1 | 1 AC019117.2        | -      |
| ENSG00000236040 | 5.13E-15 | -2.63127 | 1 | 1 CHIAP1            | K01183 |
| ENSG00000236041 | 5.13E-15 | -2.63127 | 1 | 1 COX6CP18          | -      |
| ENSG00000236042 | 5.13E-15 | -2.63127 | 1 | 1 RP1-203C2.2       | -      |
| ENSG00000236044 | 5.13E-15 | -2.63127 | 1 | 1 FABP5P2           | K08754 |
| ENSG00000236046 | 5.13E-15 | -2.63127 | 1 | 1 AC004920.3        | -      |
| ENSG00000236047 | 5.13E-15 | -2.63127 | 1 | 1 AC073410.1        | K02872 |
| ENSG00000236051 | 5.13E-15 | -2.63127 | 1 | 1 MYCBP2-AS1        | -      |
| ENSG00000236052 | 5.13E-15 | -2.63127 | 1 | 1 LL22NC03-86D4.1   | -      |
| ENSG00000236053 | 5.13E-15 | -2.63127 | 1 | 1 LINC01067         | -      |
| ENSG00000236058 | 5.13E-15 | -2.63127 | 1 | 1 RP11-215A21.2     | K02880 |
| ENSG00000236062 | 5.13E-15 | -2.63127 | 1 | 1 GSTM5P1           | K00799 |
| ENSG00000236064 | 5.13E-15 | -2.63127 | 1 | 1 RP6-191P20.4      | -      |
| ENSG00000236068 | 5.13E-15 | -2.63127 | 1 | 1 AC016561.1        | K01081 |
| ENSG00000236069 | 5.13E-15 | -2.63127 | 1 | 1 RP5-1011O1.3      | -      |
| ENSG00000236072 | 5.13E-15 | -2.63127 | 1 | 1 RP11-281B1.2      | K12891 |
| ENSG00000236073 | 5.13E-15 | -2.63127 | 1 | 1 RP11-487E1.2      | K02915 |
| ENSG00000236075 | 5.13E-15 | -2.63127 | 1 | 1 RP11-121P10.1     | -      |
| ENSG00000236076 | 5.13E-15 | -2.63127 | 1 | 1 LINC01072         | -      |
| ENSG00000236077 | 5.13E-15 | -2.63127 | 1 | 1 RP11-232D9.2      | K05038 |
| ENSG00000236078 | 5.13E-15 | -2.63127 | 1 | 1 AC095067.1        | -      |
| ENSG00000236079 | 5.13E-15 | -2.63127 | 1 | 1 RP1-321I0.11      | -      |
| ENSG00000236080 | 5.13E-15 | -2.63127 | 1 | 1 YAP1P2            | K16687 |
| ENSG00000236082 | 5.13E-15 | -2.63127 | 1 | 1 RP11-217L21.1     | -      |
| ENSG00000236083 | 5.13E-15 | -2.63127 | 1 | 1 OR13E1P           | K04257 |
| ENSG00000236085 | 5.13E-15 | -2.63127 | 1 | 1 ACTG1P4           | K05692 |
| ENSG00000236094 | 5.13E-15 | -2.63127 | 1 | 1 LINC00545         | -      |
| ENSG00000236097 | 5.13E-15 | -2.63127 | 1 | 1 BNIP3P2           | -      |
| ENSG00000236098 | 5.13E-15 | -2.63127 | 1 | 1 RP11-148B18.4     | -      |
| ENSG00000236099 | 5.13E-15 | -2.63127 | 1 | 1 AC013403.13       | K14386 |
| ENSG00000236101 | 5.13E-15 | -2.63127 | 1 | 1 RAC1P7            | -      |
| ENSG00000236102 | 5.13E-15 | -2.63127 | 1 | 1 RP4-639J15.1      | -      |
| ENSG00000236104 | 5.13E-15 | -2.63127 | 1 | 1 ZBTB22            | K10502 |
| ENSG00000236105 | 5.13E-15 | -2.63127 | 1 | 1 AC000110.1        | -      |
| ENSG00000236106 | 5.13E-15 | -2.63127 | 1 | 1 AC010729.2        | -      |
| ENSG00000236107 | 5.13E-15 | -2.63127 | 1 | 1 AC010127.3        | -      |
| ENSG00000236108 | 5.13E-15 | -2.63127 | 1 | 1 RP11-383G10.1     | K12946 |
| ENSG00000236109 | 5.13E-15 | -2.63127 | 1 | 1 AC013402.3        | -      |
| ENSG00000236111 | 5.13E-15 | -2.63127 | 1 | 1 RP11-630I5.1      | K02934 |
| ENSG00000236114 | 5.13E-15 | -2.63127 | 1 | 1 RP11-517P14.7     | K09228 |
| ENSG00000236115 | 5.13E-15 | -2.63127 | 1 | 1 RP11-62C3.6       | -      |
| ENSG00000236116 | 5.13E-15 | -2.63127 | 1 | 1 AC064853.2        | -      |
| ENSG00000236117 | 5.13E-15 | -2.63127 | 1 | 1 RP4-754E20__A.5   | -      |
| ENSG00000236118 | 5.13E-15 | -2.63127 | 1 | 1 LL22NC03-30E12.10 | -      |
| ENSG00000236121 | 5.13E-15 | -2.63127 | 1 | 1 HAUS6P2           | K16589 |
| ENSG00000236124 | 5.13E-15 | -2.63127 | 1 | 1 HMG2P23           | K11300 |
| ENSG00000236125 | 5.13E-15 | -2.63127 | 1 | 1 USP17L4           | K11845 |
| ENSG00000236126 | 5.13E-15 | -2.63127 | 1 | 1 CT47A3            | -      |
| ENSG00000236129 | 5.13E-15 | -2.63127 | 1 | 1 AP002856.4        | -      |
| ENSG00000236130 | 5.13E-15 | -2.63127 | 1 | 1 RP11-23B15.1      | -      |
| ENSG00000236131 | 5.13E-15 | -2.63127 | 1 | 1 MED13P1           | K15164 |
| ENSG00000236132 | 5.13E-15 | -2.63127 | 1 | 1 CTA-440B3.1       | K02880 |
| ENSG00000236133 | 5.13E-15 | -2.63127 | 1 | 1 LINC01069         | -      |
| ENSG00000236136 | 5.13E-15 | -2.63127 | 1 | 1 ADORA2BP          | K04267 |
| ENSG00000236138 | 5.13E-15 | -2.63127 | 1 | 1 RP11-413E6.7      | -      |

|                 |          |          |   |                 |        |
|-----------------|----------|----------|---|-----------------|--------|
| ENSG00000236140 | 5.13E-15 | -2.63127 | 1 | 1 RP11-89F3.2   | -      |
| ENSG00000236141 | 5.13E-15 | -2.63127 | 1 | 1 AC013727.2    | -      |
| ENSG00000236145 | 5.13E-15 | -2.63127 | 1 | 1 AC079988.3    | -      |
| ENSG00000236146 | 5.13E-15 | -2.63127 | 1 | 1 RP11-65J3.6   | K10452 |
| ENSG00000236148 | 5.13E-15 | -2.63127 | 1 | 1 AC114752.2    | K02893 |
| ENSG00000236151 | 5.13E-15 | -2.63127 | 1 | 1 RP5-1100I6.1  | -      |
| ENSG00000236152 | 5.13E-15 | -2.63127 | 1 | 1 MRPS36P1      | K17414 |
| ENSG00000236153 | 5.13E-15 | -2.63127 | 1 | 1 AC104076.3    | -      |
| ENSG00000236154 | 5.13E-15 | -2.63127 | 1 | 1 RP11-343J3.2  | -      |
| ENSG00000236156 | 5.13E-15 | -2.63127 | 1 | 1 CHCHD4P3      | K17782 |
| ENSG00000236157 | 5.13E-15 | -2.63127 | 1 | 1 RP11-187C18.4 | -      |
| ENSG00000236158 | 5.13E-15 | -2.63127 | 1 | 1 RFC3P1        | K10756 |
| ENSG00000236160 | 5.13E-15 | -2.63127 | 1 | 1 GS1-541M1.2   | K12399 |
| ENSG00000236162 | 5.13E-15 | -2.63127 | 1 | 1 AC092687.3    | -      |
| ENSG00000236164 | 5.13E-15 | -2.63127 | 1 | 1 RP11-268F1.3  | -      |
| ENSG00000236165 | 5.13E-15 | -2.63127 | 1 | 1 PRADC1P1      | -      |
| ENSG00000236166 | 5.13E-15 | -2.63127 | 1 | 1 RP3-523C21.2  | -      |
| ENSG00000236167 | 5.13E-15 | -2.63127 | 1 | 1 GAPDHP57      | -      |
| ENSG00000236168 | 5.13E-15 | -2.63127 | 1 | 1 RP5-831C21.1  | K08878 |
| ENSG00000236169 | 5.13E-15 | -2.63127 | 1 | 1 LINC00418     | -      |
| ENSG00000236170 | 5.13E-15 | -2.63127 | 1 | 1 IGHD1-1       | -      |
| ENSG00000236171 | 5.13E-15 | -2.63127 | 1 | 1 RP11-501J20.3 | K02870 |
| ENSG00000236172 | 5.13E-15 | -2.63127 | 1 | 1 hsa-mir-7515  | -      |
| ENSG00000236173 | 5.13E-15 | -2.63127 | 1 | 1 RP1-182D15.2  | -      |
| ENSG00000236175 | 5.13E-15 | -2.63127 | 1 | 1 SSU72P6       | K15544 |
| ENSG00000236176 | 5.13E-15 | -2.63127 | 1 | 1 LINC00353     | -      |
| ENSG00000236179 | 5.13E-15 | -2.63127 | 1 | 1 RP13-221M14.4 | -      |
| ENSG00000236180 | 5.13E-15 | -2.63127 | 1 | 1 RP11-163G10.4 | -      |
| ENSG00000236182 | 5.13E-15 | -2.63127 | 1 | 1 RP11-297K7.1  | K09880 |
| ENSG00000236185 | 5.13E-15 | -2.63127 | 1 | 1 HNRNPDL3      | -      |
| ENSG00000236187 | 5.13E-15 | -2.63127 | 1 | 1 GJA6P         | K07372 |
| ENSG00000236188 | 5.13E-15 | -2.63127 | 1 | 1 PRKX-AS1      | -      |
| ENSG00000236189 | 5.13E-15 | -2.63127 | 1 | 1 RPL18AP15     | K02882 |
| ENSG00000236190 | 5.13E-15 | -2.63127 | 1 | 1 RP3-431C21.1  | -      |
| ENSG00000236191 | 5.13E-15 | -2.63127 | 1 | 1 RPS15AP25     | K02957 |
| ENSG00000236193 | 5.13E-15 | -2.63127 | 1 | 1 RP11-105N14.3 | -      |
| ENSG00000236195 | 5.13E-15 | -2.63127 | 1 | 1 RNMTL1P2      | -      |
| ENSG00000236198 | 5.13E-15 | -2.63127 | 1 | 1 AC104395.2    | -      |
| ENSG00000236202 | 5.13E-15 | -2.63127 | 1 | 1 GRM7-AS1      | -      |
| ENSG00000236205 | 5.13E-15 | -2.63127 | 1 | 1 RP3-406C18.1  | -      |
| ENSG00000236206 | 5.13E-15 | -2.63127 | 1 | 1 RP11-306I1.2  | -      |
| ENSG00000236208 | 5.13E-15 | -2.63127 | 1 | 1 C10orf71-AS1  | -      |
| ENSG00000236211 | 5.13E-15 | -2.63127 | 1 | 1 AC068137.5    | K02256 |
| ENSG00000236212 | 5.13E-15 | -2.63127 | 1 | 1 AC009262.2    | -      |
| ENSG00000236216 | 5.13E-15 | -2.63127 | 1 | 1 PPP1R11P1     | K17553 |
| ENSG00000236217 | 5.13E-15 | -2.63127 | 1 | 1 C1DP2         | K12592 |
| ENSG00000236230 | 5.13E-15 | -2.63127 | 1 | 1 RP11-400N13.1 | -      |
| ENSG00000236231 | 5.13E-15 | -2.63127 | 1 | 1 AC017048.2    | -      |
| ENSG00000236232 | 5.13E-15 | -2.63127 | 1 | 1 AC004112.7    | K00412 |
| ENSG00000236234 | 5.13E-15 | -2.63127 | 1 | 1 AC091132.1    | -      |
| ENSG00000236235 | 5.13E-15 | -2.63127 | 1 | 1 LA16c-13E4.3  | -      |
| ENSG00000236240 | 5.13E-15 | -2.63127 | 1 | 1 GPC5-IT1      | -      |
| ENSG00000236241 | 5.13E-15 | -2.63127 | 1 | 1 RP11-744O11.2 | -      |
| ENSG00000236243 | 5.13E-15 | -2.63127 | 1 | 1 RPL6P29       | K02934 |
| ENSG00000236244 | 5.13E-15 | -2.63127 | 1 | 1 RP4-799P18.3  | -      |
| ENSG00000236246 | 5.13E-15 | -2.63127 | 1 | 1 AC073135.4    | -      |
| ENSG00000236247 | 5.13E-15 | -2.63127 | 1 | 1 RP11-292B8.2  | K12840 |
| ENSG00000236248 | 5.13E-15 | -2.63127 | 1 | 1 AC104389.32   | -      |

|                 |          |          |   |                  |        |
|-----------------|----------|----------|---|------------------|--------|
| ENSG00000236249 | 5.13E-15 | -2.63127 | 1 | 1 GAGE2C         | -      |
| ENSG00000236252 | 5.13E-15 | -2.63127 | 1 | 1 RP11-15J10.8   | K12019 |
| ENSG00000236253 | 5.13E-15 | -2.63127 | 1 | 1 SLC25A3P1      | K15102 |
| ENSG00000236256 | 5.13E-15 | -2.63127 | 1 | 1 DIAPH2-AS1     | -      |
| ENSG00000236257 | 5.13E-15 | -2.63127 | 1 | 1 EI24P2         | K10134 |
| ENSG00000236259 | 5.13E-15 | -2.63127 | 1 | 1 AC017083.2     | K03767 |
| ENSG00000236261 | 5.13E-15 | -2.63127 | 1 | 1 RP11-368M16.6  | -      |
| ENSG00000236262 | 5.13E-15 | -2.63127 | 1 | 1 SHANK2-AS2     | -      |
| ENSG00000236263 | 5.13E-15 | -2.63127 | 1 | 1 RP11-263K19.6  | -      |
| ENSG00000236267 | 5.13E-15 | -2.63127 | 1 | 1 AP006216.5     | -      |
| ENSG00000236268 | 5.13E-15 | -2.63127 | 1 | 1 RP11-170N11.1  | -      |
| ENSG00000236272 | 5.13E-15 | -2.63127 | 1 | 1 Z82214.3       | -      |
| ENSG00000236274 | 5.13E-15 | -2.63127 | 1 | 1 RP4-728D4.3    | -      |
| ENSG00000236276 | 5.13E-15 | -2.63127 | 1 | 1 NDP-AS1        | -      |
| ENSG00000236277 | 5.13E-15 | -2.63127 | 1 | 1 NIPA2P5        | -      |
| ENSG00000236278 | 5.13E-15 | -2.63127 | 1 | 1 PEBP1P3        | -      |
| ENSG00000236279 | 5.13E-15 | -2.63127 | 1 | 1 CLEC2L         | -      |
| ENSG00000236280 | 5.13E-15 | -2.63127 | 1 | 1 AC114737.3     | K00787 |
| ENSG00000236281 | 5.13E-15 | -2.63127 | 1 | 1 AC093106.5     | K03965 |
| ENSG00000236283 | 5.13E-15 | -2.63127 | 1 | 1 AC013463.2     | -      |
| ENSG00000236284 | 5.13E-15 | -2.63127 | 1 | 1 VN1R31P        | K04614 |
| ENSG00000236285 | 5.13E-15 | -2.63127 | 1 | 1 NPM1P8         | K11276 |
| ENSG00000236289 | 5.13E-15 | -2.63127 | 1 | 1 AC130710.1     | -      |
| ENSG00000236290 | 5.13E-15 | -2.63127 | 1 | 1 EEF1GP7        | K03233 |
| ENSG00000236292 | 5.13E-15 | -2.63127 | 1 | 1 RP5-1099E6.3   | -      |
| ENSG00000236294 | 5.13E-15 | -2.63127 | 1 | 1 TSRM           | -      |
| ENSG00000236295 | 5.13E-15 | -2.63127 | 1 | 1 AC007563.1     | -      |
| ENSG00000236300 | 5.13E-15 | -2.63127 | 1 | 1 AC013437.4     | -      |
| ENSG00000236301 | 5.13E-15 | -2.63127 | 1 | 1 MRGPRG-AS1     | -      |
| ENSG00000236303 | 5.13E-15 | -2.63127 | 1 | 1 RP11-540N6.1   | -      |
| ENSG00000236304 | 5.13E-15 | -2.63127 | 1 | 1 AP001189.4     | -      |
| ENSG00000236306 | 5.13E-15 | -2.63127 | 1 | 1 RP11-33G16.1   | -      |
| ENSG00000236309 | 5.13E-15 | -2.63127 | 1 | 1 RP11-508N22.10 | K12491 |
| ENSG00000236310 | 5.13E-15 | -2.63127 | 1 | 1 AC005027.3     | -      |
| ENSG00000236311 | 5.13E-15 | -2.63127 | 1 | 1 TLX1NB         | -      |
| ENSG00000236312 | 5.13E-15 | -2.63127 | 1 | 1 RPL34P34       | K02915 |
| ENSG00000236313 | 5.13E-15 | -2.63127 | 1 | 1 VN1R53P        | K04614 |
| ENSG00000236316 | 5.13E-15 | -2.63127 | 1 | 1 OR7E109P       | K04257 |
| ENSG00000236319 | 5.13E-15 | -2.63127 | 1 | 1 CTD-2033D24.2  | K14213 |
| ENSG00000236320 | 5.13E-15 | -2.63127 | 1 | 1 SLFN14         | -      |
| ENSG00000236322 | 5.13E-15 | -2.63127 | 1 | 1 RP11-327I22.8  | -      |
| ENSG00000236323 | 5.13E-15 | -2.63127 | 1 | 1 BMP6P1         | K16620 |
| ENSG00000236325 | 5.13E-15 | -2.63127 | 1 | 1 AC005300.5     | K02912 |
| ENSG00000236326 | 5.13E-15 | -2.63127 | 1 | 1 RP3-486I3.5    | -      |
| ENSG00000236330 | 5.13E-15 | -2.63127 | 1 | 1 RPL5P9         | K02932 |
| ENSG00000236332 | 5.13E-15 | -2.63127 | 1 | 1 AP001605.4     | -      |
| ENSG00000236333 | 5.13E-15 | -2.63127 | 1 | 1 TRHDE-AS1      | -      |
| ENSG00000236334 | 5.13E-15 | -2.63127 | 1 | 1 PPIAL4G        | K12738 |
| ENSG00000236335 | 5.13E-15 | -2.63127 | 1 | 1 RP4-591L5.1    | -      |
| ENSG00000236336 | 5.13E-15 | -2.63127 | 1 | 1 RP3-430A16.1   | -      |
| ENSG00000236337 | 5.13E-15 | -2.63127 | 1 | 1 FMR1-IT1       | -      |
| ENSG00000236338 | 5.13E-15 | -2.63127 | 1 | 1 AC015987.2     | -      |
| ENSG00000236339 | 5.13E-15 | -2.63127 | 1 | 1 POM121L13P     | -      |
| ENSG00000236340 | 5.13E-15 | -2.63127 | 1 | 1 AC000099.1     | -      |
| ENSG00000236341 | 5.13E-15 | -2.63127 | 1 | 1 RP5-1103B4.3   | -      |
| ENSG00000236343 | 5.13E-15 | -2.63127 | 1 | 1 EI24P4         | K10134 |
| ENSG00000236347 | 5.13E-15 | -2.63127 | 1 | 1 RP11-346D19.1  | -      |
| ENSG00000236348 | 5.13E-15 | -2.63127 | 1 | 1 PSMC1P10       | K03062 |

|                 |          |          |   |                  |        |
|-----------------|----------|----------|---|------------------|--------|
| ENSG00000236352 | 5.13E-15 | -2.63127 | 1 | 1 AC005220.3     | --     |
| ENSG00000236354 | 5.13E-15 | -2.63127 | 1 | 1 LINC00437      | --     |
| ENSG00000236355 | 5.13E-15 | -2.63127 | 1 | 1 RP3-503A6.2    | --     |
| ENSG00000236356 | 5.13E-15 | -2.63127 | 1 | 1 AC079584.2     | --     |
| ENSG00000236357 | 5.13E-15 | -2.63127 | 1 | 1 EI24P1         | K10134 |
| ENSG00000236358 | 5.13E-15 | -2.63127 | 1 | 1 RP5-827C21.2   | --     |
| ENSG00000236359 | 5.13E-15 | -2.63127 | 1 | 1 OR51B8P        | K04257 |
| ENSG00000236361 | 5.13E-15 | -2.63127 | 1 | 1 RP11-395E19.7  | --     |
| ENSG00000236362 | 5.13E-15 | -2.63127 | 1 | 1 GAGE12F        | --     |
| ENSG00000236365 | 5.13E-15 | -2.63127 | 1 | 1 RP5-849L7.1    | K15030 |
| ENSG00000236366 | 5.13E-15 | -2.63127 | 1 | 1 RP11-440G9.1   | --     |
| ENSG00000236371 | 5.13E-15 | -2.63127 | 1 | 1 CT47A1         | --     |
| ENSG00000236372 | 5.13E-15 | -2.63127 | 1 | 1 RP5-865N13.1   | --     |
| ENSG00000236373 | 5.13E-15 | -2.63127 | 1 | 1 RP11-15K3.1    | --     |
| ENSG00000236376 | 5.13E-15 | -2.63127 | 1 | 1 RP11-470F18.1  | --     |
| ENSG00000236377 | 5.13E-15 | -2.63127 | 1 | 1 AC084809.3     | --     |
| ENSG00000236378 | 5.13E-15 | -2.63127 | 1 | 1 RP11-394G3.2   | --     |
| ENSG00000236379 | 5.13E-15 | -2.63127 | 1 | 1 ZNF736P4Y      | K09228 |
| ENSG00000236380 | 5.13E-15 | -2.63127 | 1 | 1 VENTXP7        | --     |
| ENSG00000236382 | 5.13E-15 | -2.63127 | 1 | 1 KRTAP10-13P    | --     |
| ENSG00000236384 | 5.13E-15 | -2.63127 | 1 | 1 LINC00479      | --     |
| ENSG00000236385 | 5.13E-15 | -2.63127 | 1 | 1 RP11-114M1.2   | --     |
| ENSG00000236386 | 5.13E-15 | -2.63127 | 1 | 1 AC009518.3     | --     |
| ENSG00000236387 | 5.13E-15 | -2.63127 | 1 | 1 RP11-307O10.1  | --     |
| ENSG00000236388 | 5.13E-15 | -2.63127 | 1 | 1 ITCH-AS1       | --     |
| ENSG00000236389 | 5.13E-15 | -2.63127 | 1 | 1 RP1-287H17.1   | --     |
| ENSG00000236390 | 5.13E-15 | -2.63127 | 1 | 1 RP11-25B7.1    | --     |
| ENSG00000236392 | 5.13E-15 | -2.63127 | 1 | 1 AC100848.1     | --     |
| ENSG00000236394 | 5.13E-15 | -2.63127 | 1 | 1 RP11-229P13.15 | --     |
| ENSG00000236395 | 5.13E-15 | -2.63127 | 1 | 1 AC093106.6     | K02957 |
| ENSG00000236396 | 5.13E-15 | -2.63127 | 1 | 1 RP11-677O4.3   | --     |
| ENSG00000236398 | 5.13E-15 | -2.63127 | 1 | 1 TAS2R39        | K08474 |
| ENSG00000236400 | 5.13E-15 | -2.63127 | 1 | 1 KRTAP21-4P     | --     |
| ENSG00000236401 | 5.13E-15 | -2.63127 | 1 | 1 RP11-393M18.4  | --     |
| ENSG00000236403 | 5.13E-15 | -2.63127 | 1 | 1 RP11-447M12.2  | --     |
| ENSG00000236405 | 5.13E-15 | -2.63127 | 1 | 1 UBQLN1P1       | --     |
| ENSG00000236407 | 5.13E-15 | -2.63127 | 1 | 1 HMGB1P18       | K10802 |
| ENSG00000236408 | 5.13E-15 | -2.63127 | 1 | 1 RP11-476H24.1  | --     |
| ENSG00000236411 | 5.13E-15 | -2.63127 | 1 | 1 NDUFAF4P3      | K18161 |
| ENSG00000236412 | 5.13E-15 | -2.63127 | 1 | 1 RP11-132N15.2  | --     |
| ENSG00000236413 | 5.13E-15 | -2.63127 | 1 | 1 RP13-24G8.2    | --     |
| ENSG00000236414 | 5.13E-15 | -2.63127 | 1 | 1 AC004535.2     | --     |
| ENSG00000236420 | 5.13E-15 | -2.63127 | 1 | 1 CHCHD3P1       | K17563 |
| ENSG00000236424 | 5.13E-15 | -2.63127 | 1 | 1 TSPY10         | K11284 |
| ENSG00000236429 | 5.13E-15 | -2.63127 | 1 | 1 GPM6BP2        | --     |
| ENSG00000236431 | 5.13E-15 | -2.63127 | 1 | 1 AC009237.11    | K12019 |
| ENSG00000236433 | 5.13E-15 | -2.63127 | 1 | 1 RPL37P21       | --     |
| ENSG00000236434 | 5.13E-15 | -2.63127 | 1 | 1 RP11-296A18.6  | --     |
| ENSG00000236435 | 5.13E-15 | -2.63127 | 1 | 1 TSPY12P        | K11284 |
| ENSG00000236436 | 5.13E-15 | -2.63127 | 1 | 1 AC012361.1     | --     |
| ENSG00000236437 | 5.13E-15 | -2.63127 | 1 | 1 AP001891.1     | --     |
| ENSG00000236440 | 5.13E-15 | -2.63127 | 1 | 1 AC117947.1     | --     |
| ENSG00000236442 | 5.13E-15 | -2.63127 | 1 | 1 ANKRD54P1      | --     |
| ENSG00000236444 | 5.13E-15 | -2.63127 | 1 | 1 UBE2L5P        | K04552 |
| ENSG00000236445 | 5.13E-15 | -2.63127 | 1 | 1 LINC00608      | --     |
| ENSG00000236446 | 5.13E-15 | -2.63127 | 1 | 1 CT47B1         | --     |
| ENSG00000236447 | 5.13E-15 | -2.63127 | 1 | 1 ATG10-IT1      | --     |
| ENSG00000236449 | 5.13E-15 | -2.63127 | 1 | 1 AC018890.6     | --     |

|                 |          |          |   |                 |        |
|-----------------|----------|----------|---|-----------------|--------|
| ENSG00000236450 | 5.13E-15 | -2.63127 | 1 | 1 RP11-111F5.1  | --     |
| ENSG00000236451 | 5.13E-15 | -2.63127 | 1 | 1 AC067956.1    | --     |
| ENSG00000236452 | 5.13E-15 | -2.63127 | 1 | 1 AC123023.1    | --     |
| ENSG00000236453 | 5.13E-15 | -2.63127 | 1 | 1 AC003092.1    | --     |
| ENSG00000236457 | 5.13E-15 | -2.63127 | 1 | 1 AC130689.5    | --     |
| ENSG00000236459 | 5.13E-15 | -2.63127 | 1 | 1 HNRNPA1P22    | K12741 |
| ENSG00000236460 | 5.13E-15 | -2.63127 | 1 | 1 SNX2P2        | --     |
| ENSG00000236461 | 5.13E-15 | -2.63127 | 1 | 1 RP11-523L1.2  | --     |
| ENSG00000236464 | 5.13E-15 | -2.63127 | 1 | 1 CTA-796E4.3   | --     |
| ENSG00000236466 | 5.13E-15 | -2.63127 | 1 | 1 RP11-795J1.1  | --     |
| ENSG00000236467 | 5.13E-15 | -2.63127 | 1 | 1 RP11-443A13.5 | --     |
| ENSG00000236468 | 5.13E-15 | -2.63127 | 1 | 1 RP11-104D3.2  | K03231 |
| ENSG00000236469 | 5.13E-15 | -2.63127 | 1 | 1 AC007040.8    | --     |
| ENSG00000236471 | 5.13E-15 | -2.63127 | 1 | 1 AF127577.12   | --     |
| ENSG00000236472 | 5.13E-15 | -2.63127 | 1 | 1 AC002401.1    | --     |
| ENSG00000236473 | 5.13E-15 | -2.63127 | 1 | 1 KRT43P        | K07604 |
| ENSG00000236474 | 5.13E-15 | -2.63127 | 1 | 1 GCNT1P1       | K00727 |
| ENSG00000236475 | 5.13E-15 | -2.63127 | 1 | 1 TRIM26BP      | K12008 |
| ENSG00000236476 | 5.13E-15 | -2.63127 | 1 | 1 RP11-8J9.5    | --     |
| ENSG00000236477 | 5.13E-15 | -2.63127 | 1 | 1 RPS24P1       | --     |
| ENSG00000236478 | 5.13E-15 | -2.63127 | 1 | 1 AC012513.4    | K12741 |
| ENSG00000236481 | 5.13E-15 | -2.63127 | 1 | 1 AC002331.1    | --     |
| ENSG00000236484 | 5.13E-15 | -2.63127 | 1 | 1 RRM2P2        | K10808 |
| ENSG00000236485 | 5.13E-15 | -2.63127 | 1 | 1 RP1-156L9.1   | --     |
| ENSG00000236487 | 5.13E-15 | -2.63127 | 1 | 1 RP11-753E22.2 | K02894 |
| ENSG00000236491 | 5.13E-15 | -2.63127 | 1 | 1 RP13-565O16.2 | --     |
| ENSG00000236494 | 5.13E-15 | -2.63127 | 1 | 1 RP11-89N17.4  | --     |
| ENSG00000236495 | 5.13E-15 | -2.63127 | 1 | 1 RP11-7C6.1    | --     |
| ENSG00000236496 | 5.13E-15 | -2.63127 | 1 | 1 RP11-255J3.2  | K15307 |
| ENSG00000236497 | 5.13E-15 | -2.63127 | 1 | 1 RP11-66A2.2   | --     |
| ENSG00000236500 | 5.13E-15 | -2.63127 | 1 | 1 RP4-680D5.4   | --     |
| ENSG00000236501 | 5.13E-15 | -2.63127 | 1 | 1 AC079305.11   | --     |
| ENSG00000236502 | 5.13E-15 | -2.63127 | 1 | 1 SIX3-AS1      | --     |
| ENSG00000236503 | 5.13E-15 | -2.63127 | 1 | 1 AC009784.4    | K04969 |
| ENSG00000236504 | 5.13E-15 | -2.63127 | 1 | 1 AC087499.7    | --     |
| ENSG00000236505 | 5.13E-15 | -2.63127 | 1 | 1 RP1-63P18.2   | --     |
| ENSG00000236507 | 5.13E-15 | -2.63127 | 1 | 1 RP5-1050E16.1 | --     |
| ENSG00000236508 | 5.13E-15 | -2.63127 | 1 | 1 ATP13A5-AS1   | --     |
| ENSG00000236509 | 5.13E-15 | -2.63127 | 1 | 1 RPL21P133     | K02889 |
| ENSG00000236510 | 5.13E-15 | -2.63127 | 1 | 1 AC011284.3    | --     |
| ENSG00000236511 | 5.13E-15 | -2.63127 | 1 | 1 RP11-32F11.2  | --     |
| ENSG00000236513 | 5.13E-15 | -2.63127 | 1 | 1 RP11-707P20.1 | --     |
| ENSG00000236514 | 5.13E-15 | -2.63127 | 1 | 1 RP11-162G10.5 | --     |
| ENSG00000236516 | 5.13E-15 | -2.63127 | 1 | 1 KLF2P4        | K16467 |
| ENSG00000236518 | 5.13E-15 | -2.63127 | 1 | 1 RP13-77O11.7  | --     |
| ENSG00000236520 | 5.13E-15 | -2.63127 | 1 | 1 GPC6-AS1      | --     |
| ENSG00000236521 | 5.13E-15 | -2.63127 | 1 | 1 NPAP1P4       | --     |
| ENSG00000236523 | 5.13E-15 | -2.63127 | 1 | 1 NPM1P40       | K11276 |
| ENSG00000236524 | 5.13E-15 | -2.63127 | 1 | 1 RP11-134F2.2  | --     |
| ENSG00000236525 | 5.13E-15 | -2.63127 | 1 | 1 AC007278.2    | --     |
| ENSG00000236528 | 5.13E-15 | -2.63127 | 1 | 1 RP1-125I3.2   | --     |
| ENSG00000236529 | 5.13E-15 | -2.63127 | 1 | 1 RP13-254B10.1 | --     |
| ENSG00000236530 | 5.13E-15 | -2.63127 | 1 | 1 AC097711.1    | K15043 |
| ENSG00000236531 | 5.13E-15 | -2.63127 | 1 | 1 RP5-945F2.2   | --     |
| ENSG00000236532 | 5.13E-15 | -2.63127 | 1 | 1 AL035610.2    | --     |
| ENSG00000236533 | 5.13E-15 | -2.63127 | 1 | 1 AC009413.2    | K02951 |
| ENSG00000236535 | 5.13E-15 | -2.63127 | 1 | 1 RC3H1-IT1     | --     |
| ENSG00000236536 | 5.13E-15 | -2.63127 | 1 | 1 AC003986.7    | --     |

|                 |          |          |   |                 |        |
|-----------------|----------|----------|---|-----------------|--------|
| ENSG00000236538 | 5.13E-15 | -2.63127 | 1 | 1 ZNF863P       | K09228 |
| ENSG00000236539 | 5.13E-15 | -2.63127 | 1 | 1 HNRNPA1P54    | K12741 |
| ENSG00000236541 | 5.13E-15 | -2.63127 | 1 | 1 VN2R9P        | -      |
| ENSG00000236543 | 5.13E-15 | -2.63127 | 1 | 1 RP11-98L5.5   | -      |
| ENSG00000236544 | 5.13E-15 | -2.63127 | 1 | 1 AC008060.8    | -      |
| ENSG00000236550 | 5.13E-15 | -2.63127 | 1 | 1 RP4-673D20.5  | K06551 |
| ENSG00000236555 | 5.13E-15 | -2.63127 | 1 | 1 AC115115.4    | K04385 |
| ENSG00000236556 | 5.13E-15 | -2.63127 | 1 | 1 RP11-443O13.3 | -      |
| ENSG00000236562 | 5.13E-15 | -2.63127 | 1 | 1 RP11-396M11.1 | K06566 |
| ENSG00000236564 | 5.13E-15 | -2.63127 | 1 | 1 YWHAQP5       | K01368 |
| ENSG00000236569 | 5.13E-15 | -2.63127 | 1 | 1 HNRNPA1P73    | K12741 |
| ENSG00000236570 | 5.13E-15 | -2.63127 | 1 | 1 RAD23BP1      | K10839 |
| ENSG00000236571 | 5.13E-15 | -2.63127 | 1 | 1 RP6-29D12.3   | K02953 |
| ENSG00000236572 | 5.13E-15 | -2.63127 | 1 | 1 AC006369.3    | -      |
| ENSG00000236574 | 5.13E-15 | -2.63127 | 1 | 1 RP11-340I6.4  | K13504 |
| ENSG00000236576 | 5.13E-15 | -2.63127 | 1 | 1 RP11-22B10.3  | -      |
| ENSG00000236580 | 5.13E-15 | -2.63127 | 1 | 1 RP11-95P9.1   | K02920 |
| ENSG00000236582 | 5.13E-15 | -2.63127 | 1 | 1 PRPF38AP2     | K12849 |
| ENSG00000236584 | 5.13E-15 | -2.63127 | 1 | 1 BX664726.3    | -      |
| ENSG00000236590 | 5.13E-15 | -2.63127 | 1 | 1 MTATP6P4      | -      |
| ENSG00000236592 | 5.13E-15 | -2.63127 | 1 | 1 S100A11P2     | -      |
| ENSG00000236594 | 5.13E-15 | -2.63127 | 1 | 1 RPS27AP14     | -      |
| ENSG00000236595 | 5.13E-15 | -2.63127 | 1 | 1 MED15P5       | -      |
| ENSG00000236596 | 5.13E-15 | -2.63127 | 1 | 1 AC092568.1    | -      |
| ENSG00000236597 | 5.13E-15 | -2.63127 | 1 | 1 IGHD7-27      | -      |
| ENSG00000236599 | 5.13E-15 | -2.63127 | 1 | 1 TCEB1P26      | -      |
| ENSG00000236601 | 5.13E-15 | -2.63127 | 1 | 1 RP4-669L17.2  | -      |
| ENSG00000236603 | 5.13E-15 | -2.63127 | 1 | 1 RANP1         | K07936 |
| ENSG00000236604 | 5.13E-15 | -2.63127 | 1 | 1 RP11-159H20.2 | K06130 |
| ENSG00000236605 | 5.13E-15 | -2.63127 | 1 | 1 AC023115.4    | -      |
| ENSG00000236606 | 5.13E-15 | -2.63127 | 1 | 1 RP11-93H12.3  | K14394 |
| ENSG00000236607 | 5.13E-15 | -2.63127 | 1 | 1 RP11-691L4.2  | K15410 |
| ENSG00000236608 | 5.13E-15 | -2.63127 | 1 | 1 EIF4A1P6      | K03257 |
| ENSG00000236610 | 5.13E-15 | -2.63127 | 1 | 1 SOCS5P1       | K04698 |
| ENSG00000236611 | 5.13E-15 | -2.63127 | 1 | 1 AP000343.2    | -      |
| ENSG00000236612 | 5.13E-15 | -2.63127 | 1 | 1 KRTAP19-11P   | -      |
| ENSG00000236615 | 5.13E-15 | -2.63127 | 1 | 1 AC010086.5    | -      |
| ENSG00000236617 | 5.13E-15 | -2.63127 | 1 | 1 RP11-46H11.12 | -      |
| ENSG00000236620 | 5.13E-15 | -2.63127 | 1 | 1 XKRYP3        | -      |
| ENSG00000236621 | 5.13E-15 | -2.63127 | 1 | 1 OR52E1        | K04257 |
| ENSG00000236626 | 5.13E-15 | -2.63127 | 1 | 1 MTND5P17      | K03883 |
| ENSG00000236634 | 5.13E-15 | -2.63127 | 1 | 1 AC016903.1    | -      |
| ENSG00000236635 | 5.13E-15 | -2.63127 | 1 | 1 RP11-35J1.1   | -      |
| ENSG00000236636 | 5.13E-15 | -2.63127 | 1 | 1 RP11-211A18.1 | K12164 |
| ENSG00000236637 | 5.13E-15 | -2.63127 | 1 | 1 IFNA4         | K05414 |
| ENSG00000236638 | 5.13E-15 | -2.63127 | 1 | 1 RP5-905H7.4   | -      |
| ENSG00000236646 | 5.13E-15 | -2.63127 | 1 | 1 LAMTOR5P1     | K16344 |
| ENSG00000236647 | 5.13E-15 | -2.63127 | 1 | 1 AC009947.5    | -      |
| ENSG00000236648 | 5.13E-15 | -2.63127 | 1 | 1 RP11-473A10.2 | -      |
| ENSG00000236653 | 5.13E-15 | -2.63127 | 1 | 1 AC005235.1    | -      |
| ENSG00000236656 | 5.13E-15 | -2.63127 | 1 | 1 RP11-144L1.4  | -      |
| ENSG00000236660 | 5.13E-15 | -2.63127 | 1 | 1 FAM90A7P      | -      |
| ENSG00000236663 | 5.13E-15 | -2.63127 | 1 | 1 AP001631.9    | -      |
| ENSG00000236664 | 5.13E-15 | -2.63127 | 1 | 1 AC011998.1    | -      |
| ENSG00000236665 | 5.13E-15 | -2.63127 | 1 | 1 AC114808.2    | -      |
| ENSG00000236666 | 5.13E-15 | -2.63127 | 1 | 1 POTEH-AS1     | -      |
| ENSG00000236667 | 5.13E-15 | -2.63127 | 1 | 1 AC104076.2    | K02900 |
| ENSG00000236668 | 5.13E-15 | -2.63127 | 1 | 1 RP11-85O21.2  | -      |

|                 |          |          |   |                  |        |
|-----------------|----------|----------|---|------------------|--------|
| ENSG00000236669 | 5.13E-15 | -2.63127 | 1 | 1 AC006372.1     | -      |
| ENSG00000236673 | 5.13E-15 | -2.63127 | 1 | 1 RP11-69I8.2    | -      |
| ENSG00000236674 | 5.13E-15 | -2.63127 | 1 | 1 RP4-792G4.3    | K09527 |
| ENSG00000236676 | 5.13E-15 | -2.63127 | 1 | 1 RP5-837I24.4   | -      |
| ENSG00000236679 | 5.13E-15 | -2.63127 | 1 | 1 RP4-669L17.1   | K02893 |
| ENSG00000236680 | 5.13E-15 | -2.63127 | 1 | 1 RP11-296P7.4   | K03065 |
| ENSG00000236681 | 5.13E-15 | -2.63127 | 1 | 1 DSTNP5         | K10363 |
| ENSG00000236683 | 5.13E-15 | -2.63127 | 1 | 1 HMGA1P1        | K09282 |
| ENSG00000236684 | 5.13E-15 | -2.63127 | 1 | 1 AL645728.3     | K04613 |
| ENSG00000236686 | 5.13E-15 | -2.63127 | 1 | 1 BZW1P1         | -      |
| ENSG00000236687 | 5.13E-15 | -2.63127 | 1 | 1 RP11-323H21.3  | -      |
| ENSG00000236689 | 5.13E-15 | -2.63127 | 1 | 1 RP5-837O21.3   | -      |
| ENSG00000236690 | 5.13E-15 | -2.63127 | 1 | 1 AC007274.5     | -      |
| ENSG00000236691 | 5.13E-15 | -2.63127 | 1 | 1 NDUFA4P2       | K03948 |
| ENSG00000236692 | 5.13E-15 | -2.63127 | 1 | 1 RP11-1217F2.9  | K02256 |
| ENSG00000236695 | 5.13E-15 | -2.63127 | 1 | 1 HNRNPA1P47     | K12741 |
| ENSG00000236701 | 5.13E-15 | -2.63127 | 1 | 1 RP11-549A6.1   | K12491 |
| ENSG00000236703 | 5.13E-15 | -2.63127 | 1 | 1 MYB-AS1        | -      |
| ENSG00000236704 | 5.13E-15 | -2.63127 | 1 | 1 CNOT4P1        | -      |
| ENSG00000236708 | 5.13E-15 | -2.63127 | 1 | 1 AC073316.1     | -      |
| ENSG00000236709 | 5.13E-15 | -2.63127 | 1 | 1 DAPK1-IT1      | -      |
| ENSG00000236711 | 5.13E-15 | -2.63127 | 1 | 1 SMAD9-AS1      | -      |
| ENSG00000236712 | 5.13E-15 | -2.63127 | 1 | 1 AC079448.1     | -      |
| ENSG00000236713 | 5.13E-15 | -2.63127 | 1 | 1 RP11-363I22.3  | -      |
| ENSG00000236714 | 5.13E-15 | -2.63127 | 1 | 1 AC005592.1     | -      |
| ENSG00000236716 | 5.13E-15 | -2.63127 | 1 | 1 RP11-478H13.1  | -      |
| ENSG00000236717 | 5.13E-15 | -2.63127 | 1 | 1 RP11-100G15.10 | -      |
| ENSG00000236718 | 5.13E-15 | -2.63127 | 1 | 1 RBMY2QP        | K12885 |
| ENSG00000236719 | 5.13E-15 | -2.63127 | 1 | 1 OVAAL          | -      |
| ENSG00000236720 | 5.13E-15 | -2.63127 | 1 | 1 RP11-63B19.1   | -      |
| ENSG00000236722 | 5.13E-15 | -2.63127 | 1 | 1 RP11-359I18.1  | K02901 |
| ENSG00000236723 | 5.13E-15 | -2.63127 | 1 | 1 RP5-1024G6.2   | -      |
| ENSG00000236724 | 5.13E-15 | -2.63127 | 1 | 1 RP11-252M18.3  | -      |
| ENSG00000236731 | 5.13E-15 | -2.63127 | 1 | 1 RP4-801G22.2   | K06727 |
| ENSG00000236732 | 5.13E-15 | -2.63127 | 1 | 1 AC094019.4     | K02889 |
| ENSG00000236734 | 5.13E-15 | -2.63127 | 1 | 1 GRIFIN         | -      |
| ENSG00000236735 | 5.13E-15 | -2.63127 | 1 | 1 RPL31P63       | K02910 |
| ENSG00000236736 | 5.13E-15 | -2.63127 | 1 | 1 UQCRC2P1       | K00415 |
| ENSG00000236737 | 5.13E-15 | -2.63127 | 1 | 1 GAGE12B        | -      |
| ENSG00000236740 | 5.13E-15 | -2.63127 | 1 | 1 RP11-411K7.1   | -      |
| ENSG00000236741 | 5.13E-15 | -2.63127 | 1 | 1 RP4-560B9.4    | -      |
| ENSG00000236742 | 5.13E-15 | -2.63127 | 1 | 1 CTD-2340F8.3   | -      |
| ENSG00000236743 | 5.13E-15 | -2.63127 | 1 | 1 RP5-857K21.15  | -      |
| ENSG00000236744 | 5.13E-15 | -2.63127 | 1 | 1 RP11-168O22.1  | -      |
| ENSG00000236745 | 5.13E-15 | -2.63127 | 1 | 1 YRDGP2         | -      |
| ENSG00000236747 | 5.13E-15 | -2.63127 | 1 | 1 RP11-157D23.1  | -      |
| ENSG00000236748 | 5.13E-15 | -2.63127 | 1 | 1 AC009500.2     | K02940 |
| ENSG00000236750 | 5.13E-15 | -2.63127 | 1 | 1 AC009237.16    | -      |
| ENSG00000236757 | 5.13E-15 | -2.63127 | 1 | 1 AC007251.2     | -      |
| ENSG00000236758 | 5.13E-15 | -2.63127 | 1 | 1 MTUS2-AS2      | -      |
| ENSG00000236762 | 5.13E-15 | -2.63127 | 1 | 1 RP11-159H3.1   | K02885 |
| ENSG00000236763 | 5.13E-15 | -2.63127 | 1 | 1 TRMT112P4      | K15448 |
| ENSG00000236764 | 5.13E-15 | -2.63127 | 1 | 1 COX7A2P2       | K02270 |
| ENSG00000236768 | 5.13E-15 | -2.63127 | 1 | 1 RP11-1029M24.1 | K02880 |
| ENSG00000236769 | 5.13E-15 | -2.63127 | 1 | 1 RP11-168P8.5   | -      |
| ENSG00000236770 | 5.13E-15 | -2.63127 | 1 | 1 AC079325.5     | K06719 |
| ENSG00000236772 | 5.13E-15 | -2.63127 | 1 | 1 RP5-1184F4.5   | -      |
| ENSG00000236775 | 5.13E-15 | -2.63127 | 1 | 1 RP11-551G24.3  | -      |

|                 |          |          |   |                  |        |
|-----------------|----------|----------|---|------------------|--------|
| ENSG00000236776 | 5.13E-15 | -2.63127 | 1 | 1 RPL21P23       | K02889 |
| ENSG00000236777 | 5.13E-15 | -2.63127 | 1 | 1 RP11-108B14.1  | K02905 |
| ENSG00000236779 | 5.13E-15 | -2.63127 | 1 | 1 RP11-430C7.2   | —      |
| ENSG00000236783 | 5.13E-15 | -2.63127 | 1 | 1 RPS15AP27      | K02957 |
| ENSG00000236785 | 5.13E-15 | -2.63127 | 1 | 1 AC007248.7     | —      |
| ENSG00000236786 | 5.13E-15 | -2.63127 | 1 | 1 TSPY15P        | K11284 |
| ENSG00000236787 | 5.13E-15 | -2.63127 | 1 | 1 RP11-592B15.6  | K02917 |
| ENSG00000236790 | 5.13E-15 | -2.63127 | 1 | 1 LINC00299      | —      |
| ENSG00000236791 | 5.13E-15 | -2.63127 | 1 | 1 OR2AI1P        | K04257 |
| ENSG00000236792 | 5.13E-15 | -2.63127 | 1 | 1 RP11-142L4.2   | K06174 |
| ENSG00000236794 | 5.13E-15 | -2.63127 | 1 | 1 BCRP8          | K08878 |
| ENSG00000236795 | 5.13E-15 | -2.63127 | 1 | 1 AC006004.1     | —      |
| ENSG00000236796 | 5.13E-15 | -2.63127 | 1 | 1 RP11-462B18.3  | —      |
| ENSG00000236797 | 5.13E-15 | -2.63127 | 1 | 1 SPA17P1        | —      |
| ENSG00000236799 | 5.13E-15 | -2.63127 | 1 | 1 RP11-383C6.2   | —      |
| ENSG00000236800 | 5.13E-15 | -2.63127 | 1 | 1 RP11-534L6.2   | —      |
| ENSG00000236803 | 5.13E-15 | -2.63127 | 1 | 1 SDAD1P4        | K14856 |
| ENSG00000236806 | 5.13E-15 | -2.63127 | 1 | 1 RP11-337C18.7  | K02936 |
| ENSG00000236807 | 5.13E-15 | -2.63127 | 1 | 1 AC092066.6     | —      |
| ENSG00000236809 | 5.13E-15 | -2.63127 | 1 | 1 SNX25P1        | K17887 |
| ENSG00000236813 | 5.13E-15 | -2.63127 | 1 | 1 BTF3P8         | K01527 |
| ENSG00000236816 | 5.13E-15 | -2.63127 | 1 | 1 ANKRD20A7P     | K17299 |
| ENSG00000236817 | 5.13E-15 | -2.63127 | 1 | 1 RP11-978I15.10 | —      |
| ENSG00000236818 | 5.13E-15 | -2.63127 | 1 | 1 ARL5AP2        | K07949 |
| ENSG00000236819 | 5.13E-15 | -2.63127 | 1 | 1 AC087393.1     | —      |
| ENSG00000236822 | 5.13E-15 | -2.63127 | 1 | 1 RP11-137J7.2   | —      |
| ENSG00000236823 | 5.13E-15 | -2.63127 | 1 | 1 RP1-249F5.3    | —      |
| ENSG00000236825 | 5.13E-15 | -2.63127 | 1 | 1 RP11-211N8.5   | K07915 |
| ENSG00000236827 | 5.13E-15 | -2.63127 | 1 | 1 LINC00529      | —      |
| ENSG00000236828 | 5.13E-15 | -2.63127 | 1 | 1 DMD-AS3        | —      |
| ENSG00000236831 | 5.13E-15 | -2.63127 | 1 | 1 YME1L1P1       | K08955 |
| ENSG00000236832 | 5.13E-15 | -2.63127 | 1 | 1 AC073465.2     | —      |
| ENSG00000236834 | 5.13E-15 | -2.63127 | 1 | 1 LINC00421      | —      |
| ENSG00000236836 | 5.13E-15 | -2.63127 | 1 | 1 PCYT1B-AS1     | —      |
| ENSG00000236837 | 5.13E-15 | -2.63127 | 1 | 1 AC139712.4     | —      |
| ENSG00000236838 | 5.13E-15 | -2.63127 | 1 | 1 AC090617.1     | —      |
| ENSG00000236839 | 5.13E-15 | -2.63127 | 1 | 1 RP11-3P22.1    | —      |
| ENSG00000236842 | 5.13E-15 | -2.63127 | 1 | 1 RP11-399K21.10 | —      |
| ENSG00000236846 | 5.13E-15 | -2.63127 | 1 | 1 RP11-239E10.2  | —      |
| ENSG00000236847 | 5.13E-15 | -2.63127 | 1 | 1 AC018892.3     | K12019 |
| ENSG00000236848 | 5.13E-15 | -2.63127 | 1 | 1 RP11-401L13.5  | K02893 |
| ENSG00000236849 | 5.13E-15 | -2.63127 | 1 | 1 RP11-151D14.1  | —      |
| ENSG00000236852 | 5.13E-15 | -2.63127 | 1 | 1 RP11-3D23.1    | K11090 |
| ENSG00000236853 | 5.13E-15 | -2.63127 | 1 | 1 OR2R1P         | K04257 |
| ENSG00000236854 | 5.13E-15 | -2.63127 | 1 | 1 AL121656.5     | —      |
| ENSG00000236857 | 5.13E-15 | -2.63127 | 1 | 1 RP11-503K16.2  | K07836 |
| ENSG00000236858 | 5.13E-15 | -2.63127 | 1 | 1 CTA-992D9.6    | —      |
| ENSG00000236860 | 5.13E-15 | -2.63127 | 1 | 1 RPL39P29       | K02924 |
| ENSG00000236862 | 5.13E-15 | -2.63127 | 1 | 1 RPS20P24       | K02969 |
| ENSG00000236863 | 5.13E-15 | -2.63127 | 1 | 1 RPL23AP23      | —      |
| ENSG00000236864 | 5.13E-15 | -2.63127 | 1 | 1 RP11-44H4.1    | —      |
| ENSG00000236870 | 5.13E-15 | -2.63127 | 1 | 1 RP1-223D17.1   | K11599 |
| ENSG00000236872 | 5.13E-15 | -2.63127 | 1 | 1 RP11-291L19.1  | K03767 |
| ENSG00000236874 | 5.13E-15 | -2.63127 | 1 | 1 RP1-66N13.1    | —      |
| ENSG00000236875 | 5.13E-15 | -2.63127 | 1 | 1 DDX11L5        | K11273 |
| ENSG00000236877 | 5.13E-15 | -2.63127 | 1 | 1 RP11-443K8.2   | K05302 |
| ENSG00000236878 | 5.13E-15 | -2.63127 | 1 | 1 AC012363.7     | K02126 |
| ENSG00000236880 | 5.13E-15 | -2.63127 | 1 | 1 RP3-384D21.2   | K02976 |



|                 |          |          |   |                    |        |
|-----------------|----------|----------|---|--------------------|--------|
| ENSG00000236883 | 5.13E-15 | -2.63127 | 1 | 1 AP001615.9       | -      |
| ENSG00000236885 | 5.13E-15 | -2.63127 | 1 | 1 AC018731.3       | -      |
| ENSG00000236886 | 5.13E-15 | -2.63127 | 1 | 1 AC007563.5       | -      |
| ENSG00000236887 | 5.13E-15 | -2.63127 | 1 | 1 RP11-389O22.5    | K02958 |
| ENSG00000236888 | 5.13E-15 | -2.63127 | 1 | 1 RPS20P5          | K02969 |
| ENSG00000236889 | 5.13E-15 | -2.63127 | 1 | 1 RP11-38J22.1     | -      |
| ENSG00000236890 | 5.13E-15 | -2.63127 | 1 | 1 XXbac-B476C20.11 | -      |
| ENSG00000236893 | 5.13E-15 | -2.63127 | 1 | 1 ASS1P7           | K01940 |
| ENSG00000236894 | 5.13E-15 | -2.63127 | 1 | 1 RP11-128B16.3    | -      |
| ENSG00000236897 | 5.13E-15 | -2.63127 | 1 | 1 AC113331.9       | -      |
| ENSG00000236900 | 5.13E-15 | -2.63127 | 1 | 1 TIMM9P1          | K17777 |
| ENSG00000236907 | 5.13E-15 | -2.63127 | 1 | 1 RP11-548K12.3    | -      |
| ENSG00000236908 | 5.13E-15 | -2.63127 | 1 | 1 RP5-1063M23.2    | -      |
| ENSG00000236909 | 5.13E-15 | -2.63127 | 1 | 1 OR2P1P           | K04257 |
| ENSG00000236911 | 5.13E-15 | -2.63127 | 1 | 1 RP11-78B10.2     | -      |
| ENSG00000236913 | 5.13E-15 | -2.63127 | 1 | 1 AC025750.5       | K02953 |
| ENSG00000236914 | 5.13E-15 | -2.63127 | 1 | 1 RP11-1008C21.2   | -      |
| ENSG00000236915 | 5.13E-15 | -2.63127 | 1 | 1 RP4-651E10.4     | -      |
| ENSG00000236917 | 5.13E-15 | -2.63127 | 1 | 1 DNAJA1P2         | K09502 |
| ENSG00000236919 | 5.13E-15 | -2.63127 | 1 | 1 RP11-347H15.6    | K00871 |
| ENSG00000236920 | 5.13E-15 | -2.63127 | 1 | 1 RP11-111D3.2     | -      |
| ENSG00000236922 | 5.13E-15 | -2.63127 | 1 | 1 AC092661.1       | -      |
| ENSG00000236928 | 5.13E-15 | -2.63127 | 1 | 1 RP11-792A8.1     | K03687 |
| ENSG00000236929 | 5.13E-15 | -2.63127 | 1 | 1 RP11-699A7.1     | K02917 |
| ENSG00000236930 | 5.13E-15 | -2.63127 | 1 | 1 RP11-852E15.1    | K00237 |
| ENSG00000236931 | 5.13E-15 | -2.63127 | 1 | 1 BX664608.1       | K03094 |
| ENSG00000236936 | 5.13E-15 | -2.63127 | 1 | 1 RP3-329E20.2     | -      |
| ENSG00000236938 | 5.13E-15 | -2.63127 | 1 | 1 AC003092.2       | -      |
| ENSG00000236939 | 5.13E-15 | -2.63127 | 1 | 1 C8orf56          | -      |
| ENSG00000236940 | 5.13E-15 | -2.63127 | 1 | 1 RP11-98D18.7     | -      |
| ENSG00000236941 | 5.13E-15 | -2.63127 | 1 | 1 RP11-366M4.8     | K12029 |
| ENSG00000236944 | 5.13E-15 | -2.63127 | 1 | 1 CCDC58P2         | K16741 |
| ENSG00000236946 | 5.13E-15 | -2.63127 | 1 | 1 HNRNPA1P70       | K12741 |
| ENSG00000236948 | 5.13E-15 | -2.63127 | 1 | 1 RP11-154H17.1    | -      |
| ENSG00000236950 | 5.13E-15 | -2.63127 | 1 | 1 RP5-1051D14.1    | -      |
| ENSG00000236951 | 5.13E-15 | -2.63127 | 1 | 1 AC007359.6       | -      |
| ENSG00000236956 | 5.13E-15 | -2.63127 | 1 | 1 NF1P8            | K08052 |
| ENSG00000236957 | 5.13E-15 | -2.63127 | 1 | 1 RP11-451O13.1    | K13912 |
| ENSG00000236958 | 5.13E-15 | -2.63127 | 1 | 1 RP11-264A11.1    | -      |
| ENSG00000236959 | 5.13E-15 | -2.63127 | 1 | 1 SULT1D1P         | K01016 |
| ENSG00000236960 | 5.13E-15 | -2.63127 | 1 | 1 RP11-265G8.3     | K05853 |
| ENSG00000236961 | 5.13E-15 | -2.63127 | 1 | 1 RP1-261G23.5     | -      |
| ENSG00000236963 | 5.13E-15 | -2.63127 | 1 | 1 LINC01141        | -      |
| ENSG00000236965 | 5.13E-15 | -2.63127 | 1 | 1 OR52N3P          | K04257 |
| ENSG00000236966 | 5.13E-15 | -2.63127 | 1 | 1 RP11-216M21.4    | -      |
| ENSG00000236968 | 5.13E-15 | -2.63127 | 1 | 1 RP11-298E9.5     | -      |
| ENSG00000236972 | 5.13E-15 | -2.63127 | 1 | 1 FABP5P1          | K08754 |
| ENSG00000236973 | 5.13E-15 | -2.63127 | 1 | 1 GAPDHP51         | K00134 |
| ENSG00000236976 | 5.13E-15 | -2.63127 | 1 | 1 RP11-165H4.2     | K02934 |
| ENSG00000236978 | 5.13E-15 | -2.63127 | 1 | 1 RP11-575M4.1     | -      |
| ENSG00000236980 | 5.13E-15 | -2.63127 | 1 | 1 C3orf84          | -      |
| ENSG00000236981 | 5.13E-15 | -2.63127 | 1 | 1 OR10G9           | K04257 |
| ENSG00000236982 | 5.13E-15 | -2.63127 | 1 | 1 RP13-100A9.2     | K16750 |
| ENSG00000236983 | 5.13E-15 | -2.63127 | 1 | 1 LINC00614        | -      |
| ENSG00000236984 | 5.13E-15 | -2.63127 | 1 | 1 XXbac-B33L19.10  | -      |
| ENSG00000236985 | 5.13E-15 | -2.63127 | 1 | 1 RP5-1195D24.1    | -      |
| ENSG00000236987 | 5.13E-15 | -2.63127 | 1 | 1 NDUFA5P8         | K03949 |
| ENSG00000236988 | 5.13E-15 | -2.63127 | 1 | 1 RP11-402K9.1     | K17616 |

|                 |          |          |   |                 |        |
|-----------------|----------|----------|---|-----------------|--------|
| ENSG00000236989 | 5.13E-15 | -2.63127 | 1 | 1 AC142119.1    | -      |
| ENSG00000236990 | 5.13E-15 | -2.63127 | 1 | 1 RP11-433J20.1 | -      |
| ENSG00000236993 | 5.13E-15 | -2.63127 | 1 | 1 GAPDHP21      | K00134 |
| ENSG00000236994 | 5.13E-15 | -2.63127 | 1 | 1 YBX1P9        | -      |
| ENSG00000236996 | 5.13E-15 | -2.63127 | 1 | 1 MLIP-IT1      | -      |
| ENSG00000236999 | 5.13E-15 | -2.63127 | 1 | 1 ATP2B2-IT1    | -      |
| ENSG00000237000 | 5.13E-15 | -2.63127 | 1 | 1 PTMAP6        | -      |
| ENSG00000237001 | 5.13E-15 | -2.63127 | 1 | 1 WASF3-AS1     | -      |
| ENSG00000237002 | 5.13E-15 | -2.63127 | 1 | 1 SNORA40       | -      |
| ENSG00000237003 | 5.13E-15 | -2.63127 | 1 | 1 RP4-612C19.1  | K02929 |
| ENSG00000237005 | 5.13E-15 | -2.63127 | 1 | 1 HIGD1AP15     | -      |
| ENSG00000237007 | 5.13E-15 | -2.63127 | 1 | 1 KRT18P52      | K07604 |
| ENSG00000237008 | 5.13E-15 | -2.63127 | 1 | 1 AL591704.5    | K12387 |
| ENSG00000237009 | 5.13E-15 | -2.63127 | 1 | 1 GLIS3-AS1     | -      |
| ENSG00000237011 | 5.13E-15 | -2.63127 | 1 | 1 RP11-98G13.1  | -      |
| ENSG00000237013 | 5.13E-15 | -2.63127 | 1 | 1 AC010987.6    | -      |
| ENSG00000237014 | 5.13E-15 | -2.63127 | 1 | 1 AC004074.4    | -      |
| ENSG00000237016 | 5.13E-15 | -2.63127 | 1 | 1 AC013410.1    | K04079 |
| ENSG00000237017 | 5.13E-15 | -2.63127 | 1 | 1 AC012314.8    | -      |
| ENSG00000237019 | 5.13E-15 | -2.63127 | 1 | 1 GS1-433O24.1  | -      |
| ENSG00000237020 | 5.13E-15 | -2.63127 | 1 | 1 IGHD1-20      | -      |
| ENSG00000237023 | 5.13E-15 | -2.63127 | 1 | 1 USP9YP3       | K11840 |
| ENSG00000237024 | 5.13E-15 | -2.63127 | 1 | 1 AC010733.7    | K02889 |
| ENSG00000237025 | 5.13E-15 | -2.63127 | 1 | 1 RP1-315G1.1   | K06093 |
| ENSG00000237026 | 5.13E-15 | -2.63127 | 1 | 1 RP11-328P23.2 | -      |
| ENSG00000237027 | 5.13E-15 | -2.63127 | 1 | 1 RP11-16C18.3  | -      |
| ENSG00000237031 | 5.13E-15 | -2.63127 | 1 | 1 AC008067.2    | -      |
| ENSG00000237032 | 5.13E-15 | -2.63127 | 1 | 1 RP11-398C13.2 | K02998 |
| ENSG00000237033 | 5.13E-15 | -2.63127 | 1 | 1 CASP3P1       | K02187 |
| ENSG00000237035 | 5.13E-15 | -2.63127 | 1 | 1 AC109589.1    | -      |
| ENSG00000237038 | 5.13E-15 | -2.63127 | 1 | 1 USP17L8       | K11845 |
| ENSG00000237039 | 5.13E-15 | -2.63127 | 1 | 1 AC018738.2    | K02979 |
| ENSG00000237040 | 5.13E-15 | -2.63127 | 1 | 1 DPH3P2        | -      |
| ENSG00000237041 | 5.13E-15 | -2.63127 | 1 | 1 AC007679.4    | K02901 |
| ENSG00000237042 | 5.13E-15 | -2.63127 | 1 | 1 MICG          | K07985 |
| ENSG00000237048 | 5.13E-15 | -2.63127 | 1 | 1 TTTY12        | -      |
| ENSG00000237049 | 5.13E-15 | -2.63127 | 1 | 1 RPL34P1       | K02915 |
| ENSG00000237053 | 5.13E-15 | -2.63127 | 1 | 1 FUCA1P1       | K01206 |
| ENSG00000237055 | 5.13E-15 | -2.63127 | 1 | 1 AC097374.3    | K02256 |
| ENSG00000237057 | 5.13E-15 | -2.63127 | 1 | 1 AC015922.6    | -      |
| ENSG00000237058 | 5.13E-15 | -2.63127 | 1 | 1 RP13-436F16.1 | -      |
| ENSG00000237062 | 5.13E-15 | -2.63127 | 1 | 1 RP11-308N19.3 | -      |
| ENSG00000237063 | 5.13E-15 | -2.63127 | 1 | 1 RP4-550H1.5   | -      |
| ENSG00000237064 | 5.13E-15 | -2.63127 | 1 | 1 EIF3IP1       | K03246 |
| ENSG00000237065 | 5.13E-15 | -2.63127 | 1 | 1 NANOGP4       | K10164 |
| ENSG00000237068 | 5.13E-15 | -2.63127 | 1 | 1 RPL5P2        | K02932 |
| ENSG00000237069 | 5.13E-15 | -2.63127 | 1 | 1 TTTY23B       | -      |
| ENSG00000237070 | 5.13E-15 | -2.63127 | 1 | 1 AC005550.3    | -      |
| ENSG00000237072 | 5.13E-15 | -2.63127 | 1 | 1 RP11-232A1.2  | -      |
| ENSG00000237073 | 5.13E-15 | -2.63127 | 1 | 1 RP11-168K11.2 | -      |
| ENSG00000237075 | 5.13E-15 | -2.63127 | 1 | 1 RP11-497H16.2 | -      |
| ENSG00000237076 | 5.13E-15 | -2.63127 | 1 | 1 RP5-836J3.1   | -      |
| ENSG00000237077 | 5.13E-15 | -2.63127 | 1 | 1 AC105399.2    | K02923 |
| ENSG00000237078 | 5.13E-15 | -2.63127 | 1 | 1 AC007272.1    | -      |
| ENSG00000237080 | 5.13E-15 | -2.63127 | 1 | 1 EHMT2-AS1     | -      |
| ENSG00000237083 | 5.13E-15 | -2.63127 | 1 | 1 RP11-132E11.4 | K02910 |
| ENSG00000237085 | 5.13E-15 | -2.63127 | 1 | 1 AC127391.3    | -      |
| ENSG00000237086 | 5.13E-15 | -2.63127 | 1 | 1 RBPJP2        | K06053 |

|                 |          |          |   |                   |        |
|-----------------|----------|----------|---|-------------------|--------|
| ENSG00000237087 | 5.13E-15 | -2.63127 | 1 | 1 AC068134.6      | -      |
| ENSG00000237089 | 5.13E-15 | -2.63127 | 1 | 1 PCNPP4          | -      |
| ENSG00000237090 | 5.13E-15 | -2.63127 | 1 | 1 RP11-342M1.6    | K15687 |
| ENSG00000237092 | 5.13E-15 | -2.63127 | 1 | 1 LINC01065       | -      |
| ENSG00000237094 | 5.13E-15 | -2.63127 | 1 | 1 RP4-669L17.10   | -      |
| ENSG00000237096 | 5.13E-15 | -2.63127 | 1 | 1 RP4-782G3.1     | -      |
| ENSG00000237099 | 5.13E-15 | -2.63127 | 1 | 1 GYG1P2          | K00750 |
| ENSG00000237102 | 5.13E-15 | -2.63127 | 1 | 1 AC040160.1      | K10275 |
| ENSG00000237104 | 5.13E-15 | -2.63127 | 1 | 1 AC018890.4      | -      |
| ENSG00000237106 | 5.13E-15 | -2.63127 | 1 | 1 FABP5P15        | -      |
| ENSG00000237107 | 5.13E-15 | -2.63127 | 1 | 1 RP11-256G5.1    | K02929 |
| ENSG00000237109 | 5.13E-15 | -2.63127 | 1 | 1 RPL21P111       | K02889 |
| ENSG00000237110 | 5.13E-15 | -2.63127 | 1 | 1 TAAR9           | K05051 |
| ENSG00000237111 | 5.13E-15 | -2.63127 | 1 | 1 IGHJ3P          | -      |
| ENSG00000237115 | 5.13E-15 | -2.63127 | 1 | 1 RP1-131F15.2    | -      |
| ENSG00000237121 | 5.13E-15 | -2.63127 | 1 | 1 PIEZO1P2        | -      |
| ENSG00000237122 | 5.13E-15 | -2.63127 | 1 | 1 FAM90A19P       | -      |
| ENSG00000237124 | 5.13E-15 | -2.63127 | 1 | 1 MTND2P11        | -      |
| ENSG00000237125 | 5.13E-15 | -2.63127 | 1 | 1 HAND2-AS1       | -      |
| ENSG00000237127 | 5.13E-15 | -2.63127 | 1 | 1 LL22NC03-84E4.8 | -      |
| ENSG00000237128 | 5.13E-15 | -2.63127 | 1 | 1 RP11-351M16.3   | -      |
| ENSG00000237129 | 5.13E-15 | -2.63127 | 1 | 1 Z95114.7        | -      |
| ENSG00000237130 | 5.13E-15 | -2.63127 | 1 | 1 MRPS6P2         | K02990 |
| ENSG00000237131 | 5.13E-15 | -2.63127 | 1 | 1 RP1-69E11.3     | K03948 |
| ENSG00000237132 | 5.13E-15 | -2.63127 | 1 | 1 VN2R6P          | -      |
| ENSG00000237133 | 5.13E-15 | -2.63127 | 1 | 1 AC020594.5      | -      |
| ENSG00000237137 | 5.13E-15 | -2.63127 | 1 | 1 RP11-408A13.2   | -      |
| ENSG00000237138 | 5.13E-15 | -2.63127 | 1 | 1 HUNK-AS1        | -      |
| ENSG00000237140 | 5.13E-15 | -2.63127 | 1 | 1 HSPE1P16        | K04078 |
| ENSG00000237141 | 5.13E-15 | -2.63127 | 1 | 1 DNAJC19P1       | K09539 |
| ENSG00000237148 | 5.13E-15 | -2.63127 | 1 | 1 HIGD1AP2        | -      |
| ENSG00000237152 | 5.13E-15 | -2.63127 | 1 | 1 DLEU7-AS1       | -      |
| ENSG00000237153 | 5.13E-15 | -2.63127 | 1 | 1 RP11-132E11.2   | -      |
| ENSG00000237154 | 5.13E-15 | -2.63127 | 1 | 1 MCFD2P1         | -      |
| ENSG00000237158 | 5.13E-15 | -2.63127 | 1 | 1 RP11-472F14.4   | -      |
| ENSG00000237159 | 5.13E-15 | -2.63127 | 1 | 1 CNTFR-AS1       | -      |
| ENSG00000237160 | 5.13E-15 | -2.63127 | 1 | 1 AC004022.7      | -      |
| ENSG00000237161 | 5.13E-15 | -2.63127 | 1 | 1 RP11-32B5.1     | K04410 |
| ENSG00000237162 | 5.13E-15 | -2.63127 | 1 | 1 RP11-443F16.1   | K02969 |
| ENSG00000237163 | 5.13E-15 | -2.63127 | 1 | 1 RP4-771M4.2     | -      |
| ENSG00000237164 | 5.13E-15 | -2.63127 | 1 | 1 SLC25A15P2      | K15101 |
| ENSG00000237167 | 5.13E-15 | -2.63127 | 1 | 1 AC128709.2      | -      |
| ENSG00000237168 | 5.13E-15 | -2.63127 | 1 | 1 RP11-353N4.3    | K12845 |
| ENSG00000237169 | 5.13E-15 | -2.63127 | 1 | 1 RP11-452K12.3   | K02870 |
| ENSG00000237170 | 5.13E-15 | -2.63127 | 1 | 1 RPS7P15         | K02993 |
| ENSG00000237171 | 5.13E-15 | -2.63127 | 1 | 1 GS1-466O4.5     | -      |
| ENSG00000237173 | 5.13E-15 | -2.63127 | 1 | 1 RP5-866L20.2    | K00616 |
| ENSG00000237175 | 5.13E-15 | -2.63127 | 1 | 1 NME1P1          | -      |
| ENSG00000237176 | 5.13E-15 | -2.63127 | 1 | 1 RP11-813P10.2   | K13126 |
| ENSG00000237179 | 5.13E-15 | -2.63127 | 1 | 1 AC007392.4      | -      |
| ENSG00000237180 | 5.13E-15 | -2.63127 | 1 | 1 CYP46A4P        | K07440 |
| ENSG00000237181 | 5.13E-15 | -2.63127 | 1 | 1 AC147651.4      | -      |
| ENSG00000237182 | 5.13E-15 | -2.63127 | 1 | 1 RP11-402P6.3    | K03948 |
| ENSG00000237183 | 5.13E-15 | -2.63127 | 1 | 1 KRTAP9-10P      | -      |
| ENSG00000237184 | 5.13E-15 | -2.63127 | 1 | 1 AC091199.1      | -      |
| ENSG00000237185 | 5.13E-15 | -2.63127 | 1 | 1 VN1R66P         | K04614 |
| ENSG00000237186 | 5.13E-15 | -2.63127 | 1 | 1 RP11-229A12.2   | K02995 |
| ENSG00000237188 | 5.13E-15 | -2.63127 | 1 | 1 RP11-337C18.8   | -      |

|                 |          |          |   |                    |        |
|-----------------|----------|----------|---|--------------------|--------|
| ENSG00000237189 | 5.13E-15 | -2.63127 | 1 | 1 RP11-85G21.2     | -      |
| ENSG00000237191 | 5.13E-15 | -2.63127 | 1 | 1 RP11-120E5.2     | K07915 |
| ENSG00000237193 | 5.13E-15 | -2.63127 | 1 | 1 RP11-275O4.4     | -      |
| ENSG00000237194 | 5.13E-15 | -2.63127 | 1 | 1 SNAI1P1          | K05707 |
| ENSG00000237195 | 5.13E-15 | -2.63127 | 1 | 1 DLGAP5P1         | K16804 |
| ENSG00000237197 | 5.13E-15 | -2.63127 | 1 | 1 IGHD1-7          | -      |
| ENSG00000237202 | 5.13E-15 | -2.63127 | 1 | 1 AJ239321.3       | K15464 |
| ENSG00000237205 | 5.13E-15 | -2.63127 | 1 | 1 RPL7P34          | K02937 |
| ENSG00000237206 | 5.13E-15 | -2.63127 | 1 | 1 IMPDH1P4         | K00088 |
| ENSG00000237207 | 5.13E-15 | -2.63127 | 1 | 1 RP11-24B13.1     | K12840 |
| ENSG00000237208 | 5.13E-15 | -2.63127 | 1 | 1 RP11-13E5.2      | -      |
| ENSG00000237210 | 5.13E-15 | -2.63127 | 1 | 1 RP11-339F13.2    | K14610 |
| ENSG00000237211 | 5.13E-15 | -2.63127 | 1 | 1 SETP4            | K11290 |
| ENSG00000237213 | 5.13E-15 | -2.63127 | 1 | 1 RPL23AP22        | K02893 |
| ENSG00000237215 | 5.13E-15 | -2.63127 | 1 | 1 ABC12-47043100G1 | K10803 |
| ENSG00000237217 | 5.13E-15 | -2.63127 | 1 | 1 AC008074.5       | -      |
| ENSG00000237220 | 5.13E-15 | -2.63127 | 1 | 1 AC104777.3       | -      |
| ENSG00000237221 | 5.13E-15 | -2.63127 | 1 | 1 PPEF1-AS1        | -      |
| ENSG00000237222 | 5.13E-15 | -2.63127 | 1 | 1 AC090505.6       | -      |
| ENSG00000237223 | 5.13E-15 | -2.63127 | 1 | 1 SULT1C2P1        | K01025 |
| ENSG00000237224 | 5.13E-15 | -2.63127 | 1 | 1 RP11-109A6.2     | -      |
| ENSG00000237225 | 5.13E-15 | -2.63127 | 1 | 1 OR13K1P          | K04257 |
| ENSG00000237226 | 5.13E-15 | -2.63127 | 1 | 1 RPS3AP39         | K02984 |
| ENSG00000237227 | 5.13E-15 | -2.63127 | 1 | 1 RP5-1155K23.4    | K02920 |
| ENSG00000237230 | 5.13E-15 | -2.63127 | 1 | 1 KRTAP2-5P        | -      |
| ENSG00000237234 | 5.13E-15 | -2.63127 | 1 | 1 RP1-142L7.5      | -      |
| ENSG00000237235 | 5.13E-15 | -2.63127 | 1 | 1 TRDD2            | -      |
| ENSG00000237236 | 5.13E-15 | -2.63127 | 1 | 1 RP11-548K12.11   | -      |
| ENSG00000237242 | 5.13E-15 | -2.63127 | 1 | 1 BTF3P15          | -      |
| ENSG00000237247 | 5.13E-15 | -2.63127 | 1 | 1 MBD3L5           | -      |
| ENSG00000237249 | 5.13E-15 | -2.63127 | 1 | 1 RP1-102G20.2     | -      |
| ENSG00000237250 | 5.13E-15 | -2.63127 | 1 | 1 RP11-193H5.1     | -      |
| ENSG00000237251 | 5.13E-15 | -2.63127 | 1 | 1 AC072061.2       | K17299 |
| ENSG00000237252 | 5.13E-15 | -2.63127 | 1 | 1 RP11-322A17.1    | -      |
| ENSG00000237253 | 5.13E-15 | -2.63127 | 1 | 1 RP11-666A1.5     | -      |
| ENSG00000237254 | 5.13E-15 | -2.63127 | 1 | 1 TRBV30           | -      |
| ENSG00000237256 | 5.13E-15 | -2.63127 | 1 | 1 PGAM3P           | K01834 |
| ENSG00000237257 | 5.13E-15 | -2.63127 | 1 | 1 MTND2P8          | -      |
| ENSG00000237259 | 5.13E-15 | -2.63127 | 1 | 1 RP4-568F9.3      | -      |
| ENSG00000237261 | 5.13E-15 | -2.63127 | 1 | 1 AC233263.1       | -      |
| ENSG00000237262 | 5.13E-15 | -2.63127 | 1 | 1 AC068492.1       | -      |
| ENSG00000237265 | 5.13E-15 | -2.63127 | 1 | 1 RP11-402P6.9     | -      |
| ENSG00000237266 | 5.13E-15 | -2.63127 | 1 | 1 AC010729.3       | -      |
| ENSG00000237267 | 5.13E-15 | -2.63127 | 1 | 1 RP11-181F12.1    | -      |
| ENSG00000237269 | 5.13E-15 | -2.63127 | 1 | 1 RBMY2TP          | K12885 |
| ENSG00000237272 | 5.13E-15 | -2.63127 | 1 | 1 OR51R1P          | K04257 |
| ENSG00000237273 | 5.13E-15 | -2.63127 | 1 | 1 RSL24D1P8        | K02896 |
| ENSG00000237274 | 5.13E-15 | -2.63127 | 1 | 1 RP11-575C20.1    | K09191 |
| ENSG00000237275 | 5.13E-15 | -2.63127 | 1 | 1 RP11-552J9.11    | -      |
| ENSG00000237278 | 5.13E-15 | -2.63127 | 1 | 1 RLIMP2           | -      |
| ENSG00000237279 | 5.13E-15 | -2.63127 | 1 | 1 RP4-631H13.5     | K11253 |
| ENSG00000237282 | 5.13E-15 | -2.63127 | 1 | 1 LINC00851        | -      |
| ENSG00000237285 | 5.13E-15 | -2.63127 | 1 | 1 HNRNPA1P2        | K12741 |
| ENSG00000237286 | 5.13E-15 | -2.63127 | 1 | 1 AC004906.3       | -      |
| ENSG00000237290 | 5.13E-15 | -2.63127 | 1 | 1 RP11-214L19.1    | -      |
| ENSG00000237293 | 5.13E-15 | -2.63127 | 1 | 1 AC007099.2       | -      |
| ENSG00000237294 | 5.13E-15 | -2.63127 | 1 | 1 EIF4BP9          | K03258 |
| ENSG00000237297 | 5.13E-15 | -2.63127 | 1 | 1 RP11-631M21.6    | -      |

|                 |          |          |   |                  |        |
|-----------------|----------|----------|---|------------------|--------|
| ENSG00000237299 | 5.13E-15 | -2.63127 | 1 | 1 LA16c-60G3.6   | K13356 |
| ENSG00000237300 | 5.13E-15 | -2.63127 | 1 | 1 RP11-522L3.3   | -      |
| ENSG00000237302 | 5.13E-15 | -2.63127 | 1 | 1 OFD1P11Y       | K16480 |
| ENSG00000237303 | 5.13E-15 | -2.63127 | 1 | 1 HIGD1AP8       | -      |
| ENSG00000237306 | 5.13E-15 | -2.63127 | 1 | 1 HSPE1P22       | K04078 |
| ENSG00000237307 | 5.13E-15 | -2.63127 | 1 | 1 SRRM1P3        | K13171 |
| ENSG00000237308 | 5.13E-15 | -2.63127 | 1 | 1 AC009237.5     | K12019 |
| ENSG00000237309 | 5.13E-15 | -2.63127 | 1 | 1 MTND2P6        | -      |
| ENSG00000237311 | 5.13E-15 | -2.63127 | 1 | 1 RP6-159A1.3    | -      |
| ENSG00000237312 | 5.13E-15 | -2.63127 | 1 | 1 RP11-475C16.2  | -      |
| ENSG00000237314 | 5.13E-15 | -2.63127 | 1 | 1 RPL12P39       | K02870 |
| ENSG00000237316 | 5.13E-15 | -2.63127 | 1 | 1 RP1-288L1.4    | -      |
| ENSG00000237317 | 5.13E-15 | -2.63127 | 1 | 1 RP4-809F4.1    | -      |
| ENSG00000237319 | 5.13E-15 | -2.63127 | 1 | 1 RP1-136J15.1   | -      |
| ENSG00000237320 | 5.13E-15 | -2.63127 | 1 | 1 AC019064.1     | -      |
| ENSG00000237321 | 5.13E-15 | -2.63127 | 1 | 1 RP11-374A22.1  | -      |
| ENSG00000237322 | 5.13E-15 | -2.63127 | 1 | 1 RPL7L1P10      | -      |
| ENSG00000237323 | 5.13E-15 | -2.63127 | 1 | 1 AC009892.9     | K06725 |
| ENSG00000237324 | 5.13E-15 | -2.63127 | 1 | 1 RP11-439H8.4   | -      |
| ENSG00000237325 | 5.13E-15 | -2.63127 | 1 | 1 AP000563.2     | -      |
| ENSG00000237326 | 5.13E-15 | -2.63127 | 1 | 1 AC113608.1     | -      |
| ENSG00000237327 | 5.13E-15 | -2.63127 | 1 | 1 UPP2-IT1       | -      |
| ENSG00000237329 | 5.13E-15 | -2.63127 | 1 | 1 RP11-201O14.1  | K18532 |
| ENSG00000237332 | 5.13E-15 | -2.63127 | 1 | 1 RP5-878I13.1   | K07374 |
| ENSG00000237336 | 5.13E-15 | -2.63127 | 1 | 1 RP11-230L22.4  | -      |
| ENSG00000237337 | 5.13E-15 | -2.63127 | 1 | 1 RP11-567C20.2  | -      |
| ENSG00000237338 | 5.13E-15 | -2.63127 | 1 | 1 FTCD-AS1       | -      |
| ENSG00000237339 | 5.13E-15 | -2.63127 | 1 | 1 RP11-98L5.2    | -      |
| ENSG00000237341 | 5.13E-15 | -2.63127 | 1 | 1 SYP-AS1        | -      |
| ENSG00000237342 | 5.13E-15 | -2.63127 | 1 | 1 AL132796.1     | -      |
| ENSG00000237343 | 5.13E-15 | -2.63127 | 1 | 1 RP11-763B22.4  | -      |
| ENSG00000237345 | 5.13E-15 | -2.63127 | 1 | 1 RP11-344N17.11 | K00819 |
| ENSG00000237346 | 5.13E-15 | -2.63127 | 1 | 1 RP3-448I9.2    | -      |
| ENSG00000237347 | 5.13E-15 | -2.63127 | 1 | 1 AC004461.4     | K02903 |
| ENSG00000237349 | 5.13E-15 | -2.63127 | 1 | 1 RP5-1065J22.2  | K03959 |
| ENSG00000237351 | 5.13E-15 | -2.63127 | 1 | 1 CTD-2522E6.4   | K00913 |
| ENSG00000237352 | 5.13E-15 | -2.63127 | 1 | 1 RP11-145M4.3   | -      |
| ENSG00000237353 | 5.13E-15 | -2.63127 | 1 | 1 PATE4          | -      |
| ENSG00000237354 | 5.13E-15 | -2.63127 | 1 | 1 OR52S1P        | K04257 |
| ENSG00000237357 | 5.13E-15 | -2.63127 | 1 | 1 RP11-475I24.3  | -      |
| ENSG00000237358 | 5.13E-15 | -2.63127 | 1 | 1 AC007064.25    | K12019 |
| ENSG00000237359 | 5.13E-15 | -2.63127 | 1 | 1 RP11-509J21.2  | -      |
| ENSG00000237360 | 5.13E-15 | -2.63127 | 1 | 1 CHCHD4P2       | K17782 |
| ENSG00000237363 | 5.13E-15 | -2.63127 | 1 | 1 AP006288.1     | -      |
| ENSG00000237365 | 5.13E-15 | -2.63127 | 1 | 1 RP11-334N17.1  | -      |
| ENSG00000237370 | 5.13E-15 | -2.63127 | 1 | 1 AC010907.2     | -      |
| ENSG00000237372 | 5.13E-15 | -2.63127 | 1 | 1 RP11-316P17.2  | -      |
| ENSG00000237373 | 5.13E-15 | -2.63127 | 1 | 1 BRWD1-IT1      | -      |
| ENSG00000237374 | 5.13E-15 | -2.63127 | 1 | 1 AC007680.2     | -      |
| ENSG00000237378 | 5.13E-15 | -2.63127 | 1 | 1 RP11-473M10.3  | -      |
| ENSG00000237381 | 5.13E-15 | -2.63127 | 1 | 1 RP3-455H14.1   | -      |
| ENSG00000237382 | 5.13E-15 | -2.63127 | 1 | 1 RPL21P121      | K02889 |
| ENSG00000237383 | 5.13E-15 | -2.63127 | 1 | 1 CNN2P11        | -      |
| ENSG00000237385 | 5.13E-15 | -2.63127 | 1 | 1 RP11-165J3.5   | -      |
| ENSG00000237387 | 5.13E-15 | -2.63127 | 1 | 1 CTA-407F11.7   | -      |
| ENSG00000237388 | 5.13E-15 | -2.63127 | 1 | 1 OR4A47         | K04257 |
| ENSG00000237389 | 5.13E-15 | -2.63127 | 1 | 1 RP11-402L1.4   | -      |
| ENSG00000237390 | 5.13E-15 | -2.63127 | 1 | 1 RP11-139I14.2  | -      |

|                 |          |          |   |                    |        |
|-----------------|----------|----------|---|--------------------|--------|
| ENSG00000237393 | 5.13E-15 | -2.63127 | 1 | 1 SLC9A3P4         | K12040 |
| ENSG00000237396 | 5.13E-15 | -2.63127 | 1 | 1 RP4-788L20.3     | -      |
| ENSG00000237398 | 5.13E-15 | -2.63127 | 1 | 1 HLA-DPA3         | K06752 |
| ENSG00000237400 | 5.13E-15 | -2.63127 | 1 | 1 AC006960.7       | -      |
| ENSG00000237401 | 5.13E-15 | -2.63127 | 1 | 1 AC107070.1       | -      |
| ENSG00000237402 | 5.13E-15 | -2.63127 | 1 | 1 CAMTA1-IT1       | -      |
| ENSG00000237406 | 5.13E-15 | -2.63127 | 1 | 1 NDUFA9P1         | K03953 |
| ENSG00000237407 | 5.13E-15 | -2.63127 | 1 | 1 KB-1183D5.14     | -      |
| ENSG00000237408 | 5.13E-15 | -2.63127 | 1 | 1 AP005019.3       | K00775 |
| ENSG00000237409 | 5.13E-15 | -2.63127 | 1 | 1 RP11-226L15.1    | K02900 |
| ENSG00000237410 | 5.13E-15 | -2.63127 | 1 | 1 AP001092.4       | -      |
| ENSG00000237413 | 5.13E-15 | -2.63127 | 1 | 1 RP11-183M13.1    | -      |
| ENSG00000237414 | 5.13E-15 | -2.63127 | 1 | 1 RP11-321L2.2     | -      |
| ENSG00000237415 | 5.13E-15 | -2.63127 | 1 | 1 NRBF2P3          | -      |
| ENSG00000237417 | 5.13E-15 | -2.63127 | 1 | 1 XRCC6P1          | K10884 |
| ENSG00000237419 | 5.13E-15 | -2.63127 | 1 | 1 RP11-885N19.6    | -      |
| ENSG00000237422 | 5.13E-15 | -2.63127 | 1 | 1 RP11-305L7.3     | -      |
| ENSG00000237423 | 5.13E-15 | -2.63127 | 1 | 1 RP11-347D21.3    | -      |
| ENSG00000237425 | 5.13E-15 | -2.63127 | 1 | 1 RPSAP2           | K02998 |
| ENSG00000237426 | 5.13E-15 | -2.63127 | 1 | 1 ZIK1P1           | K09228 |
| ENSG00000237427 | 5.13E-15 | -2.63127 | 1 | 1 TOMM22P1         | K17769 |
| ENSG00000237428 | 5.13E-15 | -2.63127 | 1 | 1 LL22NC03-22A12.9 | K14964 |
| ENSG00000237429 | 5.13E-15 | -2.63127 | 1 | 1 RP1-159A19.4     | -      |
| ENSG00000237432 | 5.13E-15 | -2.63127 | 1 | 1 RPS7P12          | K02993 |
| ENSG00000237433 | 5.13E-15 | -2.63127 | 1 | 1 AC097639.8       | K02998 |
| ENSG00000237434 | 5.13E-15 | -2.63127 | 1 | 1 RP11-15P13.1     | K13129 |
| ENSG00000237435 | 5.13E-15 | -2.63127 | 1 | 1 RP11-147C23.1    | -      |
| ENSG00000237439 | 5.13E-15 | -2.63127 | 1 | 1 RP1-127L4.10     | -      |
| ENSG00000237440 | 5.13E-15 | -2.63127 | 1 | 1 ZNF737           | K09228 |
| ENSG00000237441 | 5.13E-15 | -2.63127 | 1 | 1 RGL2             | K17636 |
| ENSG00000237442 | 5.13E-15 | -2.63127 | 1 | 1 HNRNPA1P57       | K12741 |
| ENSG00000237443 | 5.13E-15 | -2.63127 | 1 | 1 OR13D2P          | K04257 |
| ENSG00000237444 | 5.13E-15 | -2.63127 | 1 | 1 AP001342.1       | -      |
| ENSG00000237445 | 5.13E-15 | -2.63127 | 1 | 1 CTA-520D8.2      | -      |
| ENSG00000237446 | 5.13E-15 | -2.63127 | 1 | 1 RHEBP3           | -      |
| ENSG00000237447 | 5.13E-15 | -2.63127 | 1 | 1 CDC27P2          | K03350 |
| ENSG00000237449 | 5.13E-15 | -2.63127 | 1 | 1 TAAR4P           | K05051 |
| ENSG00000237450 | 5.13E-15 | -2.63127 | 1 | 1 RP11-671J11.1    | K02893 |
| ENSG00000237451 | 5.13E-15 | -2.63127 | 1 | 1 CDK2AP2P2        | -      |
| ENSG00000237453 | 5.13E-15 | -2.63127 | 1 | 1 RP11-67L3.2      | -      |
| ENSG00000237456 | 5.13E-15 | -2.63127 | 1 | 1 RP11-154D3.1     | K17693 |
| ENSG00000237458 | 5.13E-15 | -2.63127 | 1 | 1 TUBB4BP3         | K07375 |
| ENSG00000237460 | 5.13E-15 | -2.63127 | 1 | 1 RP11-233E12.1    | -      |
| ENSG00000237461 | 5.13E-15 | -2.63127 | 1 | 1 RP11-554F20.1    | -      |
| ENSG00000237463 | 5.13E-15 | -2.63127 | 1 | 1 RP11-280O1.2     | -      |
| ENSG00000237464 | 5.13E-15 | -2.63127 | 1 | 1 RP3-461P17.9     | -      |
| ENSG00000237466 | 5.13E-15 | -2.63127 | 1 | 1 RP4-736H5.2      | -      |
| ENSG00000237467 | 5.13E-15 | -2.63127 | 1 | 1 USP9YP35         | -      |
| ENSG00000237468 | 5.13E-15 | -2.63127 | 1 | 1 RP11-715G15.1    | -      |
| ENSG00000237469 | 5.13E-15 | -2.63127 | 1 | 1 TUBB8P10         | K07375 |
| ENSG00000237470 | 5.13E-15 | -2.63127 | 1 | 1 DCLRE1CP1        | K10887 |
| ENSG00000237472 | 5.13E-15 | -2.63127 | 1 | 1 AP000361.2       | K02131 |
| ENSG00000237473 | 5.13E-15 | -2.63127 | 1 | 1 RP11-324C10.1    | -      |
| ENSG00000237474 | 5.13E-15 | -2.63127 | 1 | 1 AC233263.2       | K17985 |
| ENSG00000237475 | 5.13E-15 | -2.63127 | 1 | 1 RPL7P53          | K02937 |
| ENSG00000237476 | 5.13E-15 | -2.63127 | 1 | 1 XXbac-B135H6.15  | -      |
| ENSG00000237477 | 5.13E-15 | -2.63127 | 1 | 1 AC093911.1       | -      |
| ENSG00000237478 | 5.13E-15 | -2.63127 | 1 | 1 RP5-926E3.1      | -      |

|                 |          |          |   |                 |        |
|-----------------|----------|----------|---|-----------------|--------|
| ENSG00000237479 | 5.13E-15 | -2.63127 | 1 | 1 AC007557.2    | --     |
| ENSG00000237480 | 5.13E-15 | -2.63127 | 1 | 1 RP5-947P14.1  | --     |
| ENSG00000237481 | 5.13E-15 | -2.63127 | 1 | 1 RP4-803J11.2  | --     |
| ENSG00000237484 | 5.13E-15 | -2.63127 | 1 | 1 AP000476.1    | --     |
| ENSG00000237485 | 5.13E-15 | -2.63127 | 1 | 1 SGOL1-AS1     | --     |
| ENSG00000237487 | 5.13E-15 | -2.63127 | 1 | 1 VN1R48P       | --     |
| ENSG00000237490 | 5.13E-15 | -2.63127 | 1 | 1 RP13-926M18.1 | K02977 |
| ENSG00000237492 | 5.13E-15 | -2.63127 | 1 | 1 OR2L9P        | K04257 |
| ENSG00000237494 | 5.13E-15 | -2.63127 | 1 | 1 RP11-753B14.1 | --     |
| ENSG00000237498 | 5.13E-15 | -2.63127 | 1 | 1 AC010105.1    | --     |
| ENSG00000237500 | 5.13E-15 | -2.63127 | 1 | 1 RP11-526P5.1  | --     |
| ENSG00000237501 | 5.13E-15 | -2.63127 | 1 | 1 RP11-816B4.1  | K14618 |
| ENSG00000237502 | 5.13E-15 | -2.63127 | 1 | 1 RP1-12G14.6   | --     |
| ENSG00000237503 | 5.13E-15 | -2.63127 | 1 | 1 RP5-998N21.3  | K06689 |
| ENSG00000237510 | 5.13E-15 | -2.63127 | 1 | 1 AC008268.2    | K00629 |
| ENSG00000237513 | 5.13E-15 | -2.63127 | 1 | 1 RP11-325F22.2 | --     |
| ENSG00000237514 | 5.13E-15 | -2.63127 | 1 | 1 PTP4A1P7      | K18041 |
| ENSG00000237515 | 5.13E-15 | -2.63127 | 1 | 1 SHISA9        | K12581 |
| ENSG00000237520 | 5.13E-15 | -2.63127 | 1 | 1 RP11-443B7.2  | --     |
| ENSG00000237521 | 5.13E-15 | -2.63127 | 1 | 1 OR7E24        | K04257 |
| ENSG00000237524 | 5.13E-15 | -2.63127 | 1 | 1 AC114783.1    | --     |
| ENSG00000237525 | 5.13E-15 | -2.63127 | 1 | 1 AC012668.2    | --     |
| ENSG00000237527 | 5.13E-15 | -2.63127 | 1 | 1 AF241725.6    | --     |
| ENSG00000237528 | 5.13E-15 | -2.63127 | 1 | 1 RP11-234P3.4  | K00419 |
| ENSG00000237529 | 5.13E-15 | -2.63127 | 1 | 1 RP11-439K3.3  | --     |
| ENSG00000237530 | 5.13E-15 | -2.63127 | 1 | 1 RP3-449H6.1   | --     |
| ENSG00000237531 | 5.13E-15 | -2.63127 | 1 | 1 RP11-309M23.1 | --     |
| ENSG00000237532 | 5.13E-15 | -2.63127 | 1 | 1 AC012451.1    | --     |
| ENSG00000237533 | 5.13E-15 | -2.63127 | 1 | 1 PFN1P6        | K05759 |
| ENSG00000237534 | 5.13E-15 | -2.63127 | 1 | 1 LINC00383     | --     |
| ENSG00000237539 | 5.13E-15 | -2.63127 | 1 | 1 GS1-594A7.5   | K01672 |
| ENSG00000237540 | 5.13E-15 | -2.63127 | 1 | 1 RP11-730A19.7 | K02929 |
| ENSG00000237541 | 5.13E-15 | -2.63127 | 1 | 1 HLA-DQA2      | K06752 |
| ENSG00000237542 | 5.13E-15 | -2.63127 | 1 | 1 AC009960.5    | --     |
| ENSG00000237546 | 5.13E-15 | -2.63127 | 1 | 1 XKRYP6        | --     |
| ENSG00000237547 | 5.13E-15 | -2.63127 | 1 | 1 IGHJ2P        | --     |
| ENSG00000237549 | 5.13E-15 | -2.63127 | 1 | 1 AC092570.3    | K02991 |
| ENSG00000237552 | 5.13E-15 | -2.63127 | 1 | 1 RP11-415A20.1 | --     |
| ENSG00000237553 | 5.13E-15 | -2.63127 | 1 | 1 RP11-140C18.2 | K05255 |
| ENSG00000237555 | 5.13E-15 | -2.63127 | 1 | 1 RP5-862K6.4   | --     |
| ENSG00000237556 | 5.13E-15 | -2.63127 | 1 | 1 KCND3-AS1     | --     |
| ENSG00000237557 | 5.13E-15 | -2.63127 | 1 | 1 RP13-198D9.3  | K16197 |
| ENSG00000237558 | 5.13E-15 | -2.63127 | 1 | 1 CDY7P         | K00653 |
| ENSG00000237560 | 5.13E-15 | -2.63127 | 1 | 1 AC004562.1    | --     |
| ENSG00000237563 | 5.13E-15 | -2.63127 | 1 | 1 TTTY21B       | --     |
| ENSG00000237565 | 5.13E-15 | -2.63127 | 1 | 1 SSU72P5       | K15544 |
| ENSG00000237566 | 5.13E-15 | -2.63127 | 1 | 1 AC090955.5    | --     |
| ENSG00000237568 | 5.13E-15 | -2.63127 | 1 | 1 RP4-620F22.2  | --     |
| ENSG00000237569 | 5.13E-15 | -2.63127 | 1 | 1 TUBAP         | K07374 |
| ENSG00000237571 | 5.13E-15 | -2.63127 | 1 | 1 AC073284.4    | --     |
| ENSG00000237572 | 5.13E-15 | -2.63127 | 1 | 1 RP11-373D7.1  | K11141 |
| ENSG00000237574 | 5.13E-15 | -2.63127 | 1 | 1 AC079776.3    | --     |
| ENSG00000237576 | 5.13E-15 | -2.63127 | 1 | 1 AC097495.2    | --     |
| ENSG00000237578 | 5.13E-15 | -2.63127 | 1 | 1 RP11-174M13.1 | --     |
| ENSG00000237579 | 5.13E-15 | -2.63127 | 1 | 1 RP11-324L3.1  | --     |
| ENSG00000237580 | 5.13E-15 | -2.63127 | 1 | 1 GCSHP3        | K02437 |
| ENSG00000237581 | 5.13E-15 | -2.63127 | 1 | 1 AC005538.5    | --     |
| ENSG00000237583 | 5.13E-15 | -2.63127 | 1 | 1 AC093166.1    | K02915 |

|                 |          |          |   |                 |        |
|-----------------|----------|----------|---|-----------------|--------|
| ENSG00000237584 | 5.13E-15 | -2.63127 | 1 | 1 RAC1P4        | K04392 |
| ENSG00000237585 | 5.13E-15 | -2.63127 | 1 | 1 LINC00407     | —      |
| ENSG00000237586 | 5.13E-15 | -2.63127 | 1 | 1 RP11-383J24.2 | K16796 |
| ENSG00000237587 | 5.13E-15 | -2.63127 | 1 | 1 RP11-327I22.4 | —      |
| ENSG00000237589 | 5.13E-15 | -2.63127 | 1 | 1 HMGN1P32      | K11299 |
| ENSG00000237590 | 5.13E-15 | -2.63127 | 1 | 1 RP11-20J15.2  | —      |
| ENSG00000237592 | 5.13E-15 | -2.63127 | 1 | 1 IGKV1OR10-1   | —      |
| ENSG00000237593 | 5.13E-15 | -2.63127 | 1 | 1 RP11-317B3.2  | K02880 |
| ENSG00000237594 | 5.13E-15 | -2.63127 | 1 | 1 AP000251.3    | —      |
| ENSG00000237597 | 5.13E-15 | -2.63127 | 1 | 1 GAGE13        | —      |
| ENSG00000237601 | 5.13E-15 | -2.63127 | 1 | 1 AP000358.5    | K15522 |
| ENSG00000237603 | 5.13E-15 | -2.63127 | 1 | 1 HMGB3P12      | K11296 |
| ENSG00000237604 | 5.13E-15 | -2.63127 | 1 | 1 AP001056.1    | —      |
| ENSG00000237605 | 5.13E-15 | -2.63127 | 1 | 1 RP11-343H5.6  | —      |
| ENSG00000237606 | 5.13E-15 | -2.63127 | 1 | 1 RP11-203P23.2 | —      |
| ENSG00000237610 | 5.13E-15 | -2.63127 | 1 | 1 OR4C50P       | K04257 |
| ENSG00000237612 | 5.13E-15 | -2.63127 | 1 | 1 AP002856.7    | —      |
| ENSG00000237613 | 5.13E-15 | -2.63127 | 1 | 1 FAM138A       | —      |
| ENSG00000237614 | 5.13E-15 | -2.63127 | 1 | 1 AC073257.2    | —      |
| ENSG00000237616 | 5.13E-15 | -2.63127 | 1 | 1 USP9YP32      | —      |
| ENSG00000237617 | 5.13E-15 | -2.63127 | 1 | 1 AC013410.2    | —      |
| ENSG00000237618 | 5.13E-15 | -2.63127 | 1 | 1 BTBD7P2       | K10479 |
| ENSG00000237619 | 5.13E-15 | -2.63127 | 1 | 1 OR3B1P        | K04257 |
| ENSG00000237620 | 5.13E-15 | -2.63127 | 1 | 1 GCNT1P5       | K00727 |
| ENSG00000237621 | 5.13E-15 | -2.63127 | 1 | 1 OR9A1P        | K04257 |
| ENSG00000237622 | 5.13E-15 | -2.63127 | 1 | 1 TCEB1P18      | K03872 |
| ENSG00000237623 | 5.13E-15 | -2.63127 | 1 | 1 RP11-571E6.1  | K16607 |
| ENSG00000237625 | 5.13E-15 | -2.63127 | 1 | 1 RP11-144A16.2 | —      |
| ENSG00000237626 | 5.13E-15 | -2.63127 | 1 | 1 RP11-406A20.1 | —      |
| ENSG00000237628 | 5.13E-15 | -2.63127 | 1 | 1 RP11-522L3.4  | —      |
| ENSG00000237629 | 5.13E-15 | -2.63127 | 1 | 1 UQCRHP2       | K00416 |
| ENSG00000237630 | 5.13E-15 | -2.63127 | 1 | 1 NIFKP9        | K14838 |
| ENSG00000237631 | 5.13E-15 | -2.63127 | 1 | 1 RP11-72B4.2   | K05687 |
| ENSG00000237632 | 5.13E-15 | -2.63127 | 1 | 1 S100A11P1     | —      |
| ENSG00000237633 | 5.13E-15 | -2.63127 | 1 | 1 AC104623.2    | —      |
| ENSG00000237635 | 5.13E-15 | -2.63127 | 1 | 1 XX-2136C48.8  | —      |
| ENSG00000237636 | 5.13E-15 | -2.63127 | 1 | 1 ANKRD26P3     | —      |
| ENSG00000237637 | 5.13E-15 | -2.63127 | 1 | 1 FRY-AS1       | —      |
| ENSG00000237638 | 5.13E-15 | -2.63127 | 1 | 1 AC007386.2    | —      |
| ENSG00000237639 | 5.13E-15 | -2.63127 | 1 | 1 RP11-368M16.5 | —      |
| ENSG00000237640 | 5.13E-15 | -2.63127 | 1 | 1 RP4-604G5.1   | —      |
| ENSG00000237642 | 5.13E-15 | -2.63127 | 1 | 1 HMGB3P5       | K11296 |
| ENSG00000237643 | 5.13E-15 | -2.63127 | 1 | 1 RP11-462G2.1  | —      |
| ENSG00000237645 | 5.13E-15 | -2.63127 | 1 | 1 RP11-521A24.1 | —      |
| ENSG00000237646 | 5.13E-15 | -2.63127 | 1 | 1 HLCS-IT1      | —      |
| ENSG00000237647 | 5.13E-15 | -2.63127 | 1 | 1 ERICH1-AS1    | —      |
| ENSG00000237650 | 5.13E-15 | -2.63127 | 1 | 1 OR11Q1P       | K04257 |
| ENSG00000237653 | 5.13E-15 | -2.63127 | 1 | 1 RP11-655G22.2 | K10136 |
| ENSG00000237654 | 5.13E-15 | -2.63127 | 1 | 1 AP003025.2    | —      |
| ENSG00000237655 | 5.13E-15 | -2.63127 | 1 | 1 AC073834.3    | —      |
| ENSG00000237658 | 5.13E-15 | -2.63127 | 1 | 1 RP5-968D22.3  | —      |
| ENSG00000237659 | 5.13E-15 | -2.63127 | 1 | 1 RNASEH2CP1    | K10745 |
| ENSG00000237661 | 5.13E-15 | -2.63127 | 1 | 1 RP11-169L17.5 | —      |
| ENSG00000237662 | 5.13E-15 | -2.63127 | 1 | 1 SOCS2P1       | K04695 |
| ENSG00000237665 | 5.13E-15 | -2.63127 | 1 | 1 GRM7-AS2      | —      |
| ENSG00000237666 | 5.13E-15 | -2.63127 | 1 | 1 AC108868.3    | K03348 |
| ENSG00000237667 | 5.13E-15 | -2.63127 | 1 | 1 LINC01115     | —      |
| ENSG00000237670 | 5.13E-15 | -2.63127 | 1 | 1 AC080094.1    | —      |



|                 |          |          |   |                   |        |
|-----------------|----------|----------|---|-------------------|--------|
| ENSG00000237671 | 5.13E-15 | -2.63127 | 1 | 1 GAGE12C         | -      |
| ENSG00000237672 | 5.13E-15 | -2.63127 | 1 | 1 KRR1P1          | K06961 |
| ENSG00000237674 | 5.13E-15 | -2.63127 | 1 | 1 GSTA7P          | K00799 |
| ENSG00000237675 | 5.13E-15 | -2.63127 | 1 | 1 TEX36-AS1       | -      |
| ENSG00000237676 | 5.13E-15 | -2.63127 | 1 | 1 RPL30P4         | K02908 |
| ENSG00000237677 | 5.13E-15 | -2.63127 | 1 | 1 AC113612.2      | -      |
| ENSG00000237679 | 5.13E-15 | -2.63127 | 1 | 1 VDAC1P11        | K05862 |
| ENSG00000237682 | 5.13E-15 | -2.63127 | 1 | 1 RP3-514P16.1    | K06069 |
| ENSG00000237684 | 5.13E-15 | -2.63127 | 1 | 1 RPSAP35         | K02998 |
| ENSG00000237687 | 5.13E-15 | -2.63127 | 1 | 1 LINC00686       | -      |
| ENSG00000237693 | 5.13E-15 | -2.63127 | 1 | 1 IRGM            | K14139 |
| ENSG00000237697 | 5.13E-15 | -2.63127 | 1 | 1 LINC00312       | -      |
| ENSG00000237699 | 5.13E-15 | -2.63127 | 1 | 1 RP11-199F6.4    | -      |
| ENSG00000237700 | 5.13E-15 | -2.63127 | 1 | 1 RP11-219C24.6   | -      |
| ENSG00000237701 | 5.13E-15 | -2.63127 | 1 | 1 ATP5JP1         | K02131 |
| ENSG00000237702 | 5.13E-15 | -2.63127 | 1 | 1 TRBV3-1         | -      |
| ENSG00000237705 | 5.13E-15 | -2.63127 | 1 | 1 AC008937.2      | -      |
| ENSG00000237706 | 5.13E-15 | -2.63127 | 1 | 1 TRIM51EP        | K12019 |
| ENSG00000237707 | 5.13E-15 | -2.63127 | 1 | 1 RP5-1018K9.1    | -      |
| ENSG00000237708 | 5.13E-15 | -2.63127 | 1 | 1 RP11-445O16.2   | -      |
| ENSG00000237709 | 5.13E-15 | -2.63127 | 1 | 1 EEF1A1P28       | K03231 |
| ENSG00000237711 | 5.13E-15 | -2.63127 | 1 | 1 RP11-39K24.13   | -      |
| ENSG00000237713 | 5.13E-15 | -2.63127 | 1 | 1 AC006000.5      | -      |
| ENSG00000237716 | 5.13E-15 | -2.63127 | 1 | 1 RP3-400B16.3    | -      |
| ENSG00000237717 | 5.13E-15 | -2.63127 | 1 | 1 RP11-402P6.4    | K03948 |
| ENSG00000237718 | 5.13E-15 | -2.63127 | 1 | 1 AC009095.4      | -      |
| ENSG00000237719 | 5.13E-15 | -2.63127 | 1 | 1 RP1-179N16.3    | K13987 |
| ENSG00000237720 | 5.13E-15 | -2.63127 | 1 | 1 AC011995.1      | -      |
| ENSG00000237722 | 5.13E-15 | -2.63127 | 1 | 1 MTND1P29        | K03878 |
| ENSG00000237726 | 5.13E-15 | -2.63127 | 1 | 1 RP11-386O9.2    | -      |
| ENSG00000237728 | 5.13E-15 | -2.63127 | 1 | 1 RP3-453P22.2    | -      |
| ENSG00000237730 | 5.13E-15 | -2.63127 | 1 | 1 RP11-459A10.1   | K02989 |
| ENSG00000237731 | 5.13E-15 | -2.63127 | 1 | 1 RNGTHP1         | -      |
| ENSG00000237734 | 5.13E-15 | -2.63127 | 1 | 1 RP11-298E2.2    | -      |
| ENSG00000237735 | 5.13E-15 | -2.63127 | 1 | 1 AP000473.6      | -      |
| ENSG00000237736 | 5.13E-15 | -2.63127 | 1 | 1 U82670.4        | -      |
| ENSG00000237738 | 5.13E-15 | -2.63127 | 1 | 1 RNF216-IT1      | -      |
| ENSG00000237740 | 5.13E-15 | -2.63127 | 1 | 1 NPAP1P3         | K13506 |
| ENSG00000237741 | 5.13E-15 | -2.63127 | 1 | 1 AC002368.4      | -      |
| ENSG00000237743 | 5.13E-15 | -2.63127 | 1 | 1 XXyac-YM21GA2.6 | K03841 |
| ENSG00000237745 | 5.13E-15 | -2.63127 | 1 | 1 AC009963.5      | K02891 |
| ENSG00000237746 | 5.13E-15 | -2.63127 | 1 | 1 ZNF101P1        | K09228 |
| ENSG00000237747 | 5.13E-15 | -2.63127 | 1 | 1 RP11-65B23.3    | K03245 |
| ENSG00000237749 | 5.13E-15 | -2.63127 | 1 | 1 RP3-423B22.5    | K02978 |
| ENSG00000237750 | 5.13E-15 | -2.63127 | 1 | 1 AC007740.1      | -      |
| ENSG00000237751 | 5.13E-15 | -2.63127 | 1 | 1 LINC01143       | -      |
| ENSG00000237752 | 5.13E-15 | -2.63127 | 1 | 1 RP13-75G22.1    | K05750 |
| ENSG00000237754 | 5.13E-15 | -2.63127 | 1 | 1 RP11-521C10.1   | -      |
| ENSG00000237756 | 5.13E-15 | -2.63127 | 1 | 1 RP11-77M5.1     | -      |
| ENSG00000237757 | 5.13E-15 | -2.63127 | 1 | 1 EEF1A1P30       | K03231 |
| ENSG00000237759 | 5.13E-15 | -2.63127 | 1 | 1 RP11-278H7.3    | -      |
| ENSG00000237760 | 5.13E-15 | -2.63127 | 1 | 1 AC092657.2      | -      |
| ENSG00000237761 | 5.13E-15 | -2.63127 | 1 | 1 RP11-127O4.2    | -      |
| ENSG00000237763 | 5.13E-15 | -2.63127 | 1 | 1 AMY1A           | K01176 |
| ENSG00000237764 | 5.13E-15 | -2.63127 | 1 | 1 RP11-3B12.2     | -      |
| ENSG00000237767 | 5.13E-15 | -2.63127 | 1 | 1 RP11-101E14.2   | -      |
| ENSG00000237770 | 5.13E-15 | -2.63127 | 1 | 1 SPATA31D2P      | -      |
| ENSG00000237774 | 5.13E-15 | -2.63127 | 1 | 1 RP11-129B9.1    | K02875 |

|                 |          |          |   |                 |        |
|-----------------|----------|----------|---|-----------------|--------|
| ENSG00000237775 | 5.13E-15 | -2.63127 | 1 | 1 DDR1-AS1      | -      |
| ENSG00000237782 | 5.13E-15 | -2.63127 | 1 | 1 RP1-192P9.1   | -      |
| ENSG00000237783 | 5.13E-15 | -2.63127 | 1 | 1 RP11-306I1.1  | K02981 |
| ENSG00000237784 | 5.13E-15 | -2.63127 | 1 | 1 AC097713.5    | K02969 |
| ENSG00000237787 | 5.13E-15 | -2.63127 | 1 | 1 C3orf79       | -      |
| ENSG00000237788 | 5.13E-15 | -2.63127 | 1 | 1 RP5-1041C10.3 | -      |
| ENSG00000237790 | 5.13E-15 | -2.63127 | 1 | 1 AC009499.2    | -      |
| ENSG00000237792 | 5.13E-15 | -2.63127 | 1 | 1 RP11-203I2.1  | -      |
| ENSG00000237793 | 5.13E-15 | -2.63127 | 1 | 1 RPL18AP16     | K02882 |
| ENSG00000237797 | 5.13E-15 | -2.63127 | 1 | 1 RP11-472N13.3 | -      |
| ENSG00000237798 | 5.13E-15 | -2.63127 | 1 | 1 AC010894.5    | -      |
| ENSG00000237799 | 5.13E-15 | -2.63127 | 1 | 1 CICP11        | K16941 |
| ENSG00000237801 | 5.13E-15 | -2.63127 | 1 | 1 AMDP1         | K01611 |
| ENSG00000237802 | 5.13E-15 | -2.63127 | 1 | 1 FAM197Y6      | -      |
| ENSG00000237803 | 5.13E-15 | -2.63127 | 1 | 1 LINC00211     | -      |
| ENSG00000237804 | 5.13E-15 | -2.63127 | 1 | 1 HNRNPA1P39    | K12741 |
| ENSG00000237806 | 5.13E-15 | -2.63127 | 1 | 1 FAUP2         | K02983 |
| ENSG00000237807 | 5.13E-15 | -2.63127 | 1 | 1 RP11-400K9.4  | -      |
| ENSG00000237810 | 5.13E-15 | -2.63127 | 1 | 1 CTD-2571E19.3 | K06631 |
| ENSG00000237816 | 5.13E-15 | -2.63127 | 1 | 1 RPL21P109     | K02889 |
| ENSG00000237818 | 5.13E-15 | -2.63127 | 1 | 1 RPS3AP29      | K02984 |
| ENSG00000237823 | 5.13E-15 | -2.63127 | 1 | 1 CDY19P        | K00653 |
| ENSG00000237824 | 5.13E-15 | -2.63127 | 1 | 1 AC010747.2    | K02893 |
| ENSG00000237831 | 5.13E-15 | -2.63127 | 1 | 1 RP11-499O7.4  | K04119 |
| ENSG00000237832 | 5.13E-15 | -2.63127 | 1 | 1 RP5-974N19.1  | -      |
| ENSG00000237833 | 5.13E-15 | -2.63127 | 1 | 1 RP11-432N13.2 | K02678 |
| ENSG00000237835 | 5.13E-15 | -2.63127 | 1 | 1 AC007064.22   | K09228 |
| ENSG00000237837 | 5.13E-15 | -2.63127 | 1 | 1 AC159540.3    | -      |
| ENSG00000237838 | 5.13E-15 | -2.63127 | 1 | 1 AC133680.1    | -      |
| ENSG00000237841 | 5.13E-15 | -2.63127 | 1 | 1 KRTAP19-9P    | -      |
| ENSG00000237843 | 5.13E-15 | -2.63127 | 1 | 1 AC016903.2    | -      |
| ENSG00000237844 | 5.13E-15 | -2.63127 | 1 | 1 AC092684.1    | -      |
| ENSG00000237845 | 5.13E-15 | -2.63127 | 1 | 1 RP5-940F7.2   | -      |
| ENSG00000237847 | 5.13E-15 | -2.63127 | 1 | 1 FAM231A       | -      |
| ENSG00000237849 | 5.13E-15 | -2.63127 | 1 | 1 NFYAP1        | K08064 |
| ENSG00000237850 | 5.13E-15 | -2.63127 | 1 | 1 RP11-483E23.2 | K09488 |
| ENSG00000237851 | 5.13E-15 | -2.63127 | 1 | 1 RP1-67K17.4   | -      |
| ENSG00000237853 | 5.13E-15 | -2.63127 | 1 | 1 RP5-833A20.1  | -      |
| ENSG00000237854 | 5.13E-15 | -2.63127 | 1 | 1 LINC00674     | K04678 |
| ENSG00000237856 | 5.13E-15 | -2.63127 | 1 | 1 AC062020.2    | -      |
| ENSG00000237859 | 5.13E-15 | -2.63127 | 1 | 1 EEF1A1P31     | K03231 |
| ENSG00000237860 | 5.13E-15 | -2.63127 | 1 | 1 RP11-232D9.4  | K05038 |
| ENSG00000237861 | 5.13E-15 | -2.63127 | 1 | 1 RP11-332L8.1  | K19514 |
| ENSG00000237863 | 5.13E-15 | -2.63127 | 1 | 1 RP6-24A23.3   | -      |
| ENSG00000237869 | 5.13E-15 | -2.63127 | 1 | 1 RP11-459O16.1 | K13676 |
| ENSG00000237872 | 5.13E-15 | -2.63127 | 1 | 1 POU5F1P4      | K09367 |
| ENSG00000237873 | 5.13E-15 | -2.63127 | 1 | 1 RP11-156J23.1 | K16804 |
| ENSG00000237874 | 5.13E-15 | -2.63127 | 1 | 1 RP3-393K13.1  | -      |
| ENSG00000237875 | 5.13E-15 | -2.63127 | 1 | 1 RP5-1174J21.1 | K02984 |
| ENSG00000237876 | 5.13E-15 | -2.63127 | 1 | 1 AKR1B1P4      | K00011 |
| ENSG00000237879 | 5.13E-15 | -2.63127 | 1 | 1 LINC00398     | -      |
| ENSG00000237880 | 5.13E-15 | -2.63127 | 1 | 1 AC096669.2    | -      |
| ENSG00000237882 | 5.13E-15 | -2.63127 | 1 | 1 PPIAP13       | K03767 |
| ENSG00000237885 | 5.13E-15 | -2.63127 | 1 | 1 RP11-208C17.4 | -      |
| ENSG00000237888 | 5.13E-15 | -2.63127 | 1 | 1 AC087650.1    | K02905 |
| ENSG00000237891 | 5.13E-15 | -2.63127 | 1 | 1 RP11-417D4.1  | K10704 |
| ENSG00000237892 | 5.13E-15 | -2.63127 | 1 | 1 KLF7-IT1      | -      |
| ENSG00000237896 | 5.13E-15 | -2.63127 | 1 | 1 AC005008.2    | -      |

|                 |          |          |   |                  |        |
|-----------------|----------|----------|---|------------------|--------|
| ENSG00000237897 | 5.13E-15 | -2.63127 | 1 | 1 RP11-90H3.2    | K13213 |
| ENSG00000237901 | 5.13E-15 | -2.63127 | 1 | 1 AC009161.1     | -      |
| ENSG00000237902 | 5.13E-15 | -2.63127 | 1 | 1 TSPY21P        | -      |
| ENSG00000237904 | 5.13E-15 | -2.63127 | 1 | 1 RP11-460E7.9   | K12019 |
| ENSG00000237906 | 5.13E-15 | -2.63127 | 1 | 1 MUPP           | -      |
| ENSG00000237907 | 5.13E-15 | -2.63127 | 1 | 1 RP5-1013A22.2  | -      |
| ENSG00000237910 | 5.13E-15 | -2.63127 | 1 | 1 AC073869.7     | K02256 |
| ENSG00000237911 | 5.13E-15 | -2.63127 | 1 | 1 SRP68P3        | K03107 |
| ENSG00000237913 | 5.13E-15 | -2.63127 | 1 | 1 FTLP19         | K13625 |
| ENSG00000237914 | 5.13E-15 | -2.63127 | 1 | 1 RP11-77C3.3    | -      |
| ENSG00000237917 | 5.13E-15 | -2.63127 | 1 | 1 PARP4P1        | K10798 |
| ENSG00000237919 | 5.13E-15 | -2.63127 | 1 | 1 RP11-181B18.1  | -      |
| ENSG00000237920 | 5.13E-15 | -2.63127 | 1 | 1 RP11-350G8.4   | K17411 |
| ENSG00000237921 | 5.13E-15 | -2.63127 | 1 | 1 AC004543.2     | -      |
| ENSG00000237922 | 5.13E-15 | -2.63127 | 1 | 1 RP11-478H16.1  | K09570 |
| ENSG00000237924 | 5.13E-15 | -2.63127 | 1 | 1 RPL21P112      | K02889 |
| ENSG00000237926 | 5.13E-15 | -2.63127 | 1 | 1 RP13-346H10.2  | -      |
| ENSG00000237929 | 5.13E-15 | -2.63127 | 1 | 1 RPL31P3        | K02910 |
| ENSG00000237930 | 5.13E-15 | -2.63127 | 1 | 1 AC007563.4     | K02910 |
| ENSG00000237931 | 5.13E-15 | -2.63127 | 1 | 1 RP11-469E19.1  | K05024 |
| ENSG00000237936 | 5.13E-15 | -2.63127 | 1 | 1 RP11-224P11.1  | K03111 |
| ENSG00000237937 | 5.13E-15 | -2.63127 | 1 | 1 AP000770.1     | -      |
| ENSG00000237938 | 5.13E-15 | -2.63127 | 1 | 1 RP11-288I21.1  | -      |
| ENSG00000237939 | 5.13E-15 | -2.63127 | 1 | 1 AC097523.3     | K01823 |
| ENSG00000237941 | 5.13E-15 | -2.63127 | 1 | 1 KCNQ1DN        | -      |
| ENSG00000237943 | 5.13E-15 | -2.63127 | 1 | 1 PRKCQ-AS1      | -      |
| ENSG00000237947 | 5.13E-15 | -2.63127 | 1 | 1 RP11-570K4.1   | -      |
| ENSG00000237948 | 5.13E-15 | -2.63127 | 1 | 1 Z95114.5       | -      |
| ENSG00000237949 | 5.13E-15 | -2.63127 | 1 | 1 LINC00844      | -      |
| ENSG00000237951 | 5.13E-15 | -2.63127 | 1 | 1 PPIL1P1        | K12733 |
| ENSG00000237952 | 5.13E-15 | -2.63127 | 1 | 1 RPL7AP73       | K02936 |
| ENSG00000237953 | 5.13E-15 | -2.63127 | 1 | 1 AC013267.1     | K02953 |
| ENSG00000237954 | 5.13E-15 | -2.63127 | 1 | 1 RP11-14O19.2   | -      |
| ENSG00000237955 | 5.13E-15 | -2.63127 | 1 | 1 AC008746.10    | -      |
| ENSG00000237956 | 5.13E-15 | -2.63127 | 1 | 1 TRIAP1P1       | -      |
| ENSG00000237957 | 5.13E-15 | -2.63127 | 1 | 1 CT47A5         | -      |
| ENSG00000237959 | 5.13E-15 | -2.63127 | 1 | 1 RPL36AP10      | K02929 |
| ENSG00000237961 | 5.13E-15 | -2.63127 | 1 | 1 RP11-1281K21.1 | K17299 |
| ENSG00000237963 | 5.13E-15 | -2.63127 | 1 | 1 RP11-151G12.2  | -      |
| ENSG00000237964 | 5.13E-15 | -2.63127 | 1 | 1 AC068042.1     | K10873 |
| ENSG00000237968 | 5.13E-15 | -2.63127 | 1 | 1 AC007322.7     | -      |
| ENSG00000237970 | 5.13E-15 | -2.63127 | 1 | 1 TMEM161BP1     | -      |
| ENSG00000237971 | 5.13E-15 | -2.63127 | 1 | 1 RP11-231N9.1   | -      |
| ENSG00000237974 | 5.13E-15 | -2.63127 | 1 | 1 AC000111.4     | -      |
| ENSG00000237975 | 5.13E-15 | -2.63127 | 1 | 1 FLG-AS1        | -      |
| ENSG00000237979 | 5.13E-15 | -2.63127 | 1 | 1 AC007389.1     | K09518 |
| ENSG00000237980 | 5.13E-15 | -2.63127 | 1 | 1 RP11-338C15.3  | -      |
| ENSG00000237986 | 5.13E-15 | -2.63127 | 1 | 1 CELF2-AS2      | -      |
| ENSG00000237987 | 5.13E-15 | -2.63127 | 1 | 1 RP11-503C24.2  | -      |
| ENSG00000237988 | 5.13E-15 | -2.63127 | 1 | 1 OR2I1P         | K04257 |
| ENSG00000237990 | 5.13E-15 | -2.63127 | 1 | 1 CNTN4-AS1      | -      |
| ENSG00000237991 | 5.13E-15 | -2.63127 | 1 | 1 RPL35P1        | K02918 |
| ENSG00000237992 | 5.13E-15 | -2.63127 | 1 | 1 AC010096.2     | -      |
| ENSG00000237993 | 5.13E-15 | -2.63127 | 1 | 1 RP11-159M11.2  | -      |
| ENSG00000237994 | 5.13E-15 | -2.63127 | 1 | 1 RP1-146A15.1   | -      |
| ENSG00000237997 | 5.13E-15 | -2.63127 | 1 | 1 RCC2P2         | -      |
| ENSG00000237998 | 5.13E-15 | -2.63127 | 1 | 1 RP11-432J9.5   | -      |
| ENSG00000237999 | 5.13E-15 | -2.63127 | 1 | 1 RP11-394D2.1   | K05692 |

|                 |          |          |   |                 |        |
|-----------------|----------|----------|---|-----------------|--------|
| ENSG00000238002 | 5.13E-15 | -2.63127 | 1 | 1 NPAP1P6       | -      |
| ENSG00000238003 | 5.13E-15 | -2.63127 | 1 | 1 RP11-465N4.2  | K02866 |
| ENSG00000238004 | 5.13E-15 | -2.63127 | 1 | 1 AC009227.3    | -      |
| ENSG00000238007 | 5.13E-15 | -2.63127 | 1 | 1 AC024619.2    | -      |
| ENSG00000238008 | 5.13E-15 | -2.63127 | 1 | 1 COX6CP10      | K02268 |
| ENSG00000238010 | 5.13E-15 | -2.63127 | 1 | 1 RP11-123K19.2 | -      |
| ENSG00000238012 | 5.13E-15 | -2.63127 | 1 | 1 AC114752.1    | -      |
| ENSG00000238013 | 5.13E-15 | -2.63127 | 1 | 1 RP11-427P5.2  | K02130 |
| ENSG00000238019 | 5.13E-15 | -2.63127 | 1 | 1 RP11-732M18.2 | -      |
| ENSG00000238020 | 5.13E-15 | -2.63127 | 1 | 1 HTR3E-AS1     | -      |
| ENSG00000238021 | 5.13E-15 | -2.63127 | 1 | 1 ARMC4P1       | -      |
| ENSG00000238022 | 5.13E-15 | -2.63127 | 1 | 1 RP11-38C18.3  | -      |
| ENSG00000238024 | 5.13E-15 | -2.63127 | 1 | 1 DDX39BP2      | -      |
| ENSG00000238025 | 5.13E-15 | -2.63127 | 1 | 1 ZDHHC4P1      | K18932 |
| ENSG00000238026 | 5.13E-15 | -2.63127 | 1 | 1 RP11-78E6.1   | -      |
| ENSG00000238029 | 5.13E-15 | -2.63127 | 1 | 1 AC012493.1    | K08773 |
| ENSG00000238031 | 5.13E-15 | -2.63127 | 1 | 1 AC090505.1    | -      |
| ENSG00000238032 | 5.13E-15 | -2.63127 | 1 | 1 RP11-38O23.7  | -      |
| ENSG00000238033 | 5.13E-15 | -2.63127 | 1 | 1 AC002480.2    | -      |
| ENSG00000238034 | 5.13E-15 | -2.63127 | 1 | 1 RP5-1185K9.1  | -      |
| ENSG00000238037 | 5.13E-15 | -2.63127 | 1 | 1 OOSP1P1       | -      |
| ENSG00000238038 | 5.13E-15 | -2.63127 | 1 | 1 ATP6V0E1P3    | K02153 |
| ENSG00000238039 | 5.13E-15 | -2.63127 | 1 | 1 AF011889.2    | -      |
| ENSG00000238040 | 5.13E-15 | -2.63127 | 1 | 1 SALL4P2       | -      |
| ENSG00000238042 | 5.13E-15 | -2.63127 | 1 | 1 RP11-815M8.1  | -      |
| ENSG00000238046 | 5.13E-15 | -2.63127 | 1 | 1 MTND5P22      | -      |
| ENSG00000238047 | 5.13E-15 | -2.63127 | 1 | 1 MTND1P30      | -      |
| ENSG00000238051 | 5.13E-15 | -2.63127 | 1 | 1 ISCUPI        | -      |
| ENSG00000238057 | 5.13E-15 | -2.63127 | 1 | 1 ZEB2-AS1      | -      |
| ENSG00000238062 | 5.13E-15 | -2.63127 | 1 | 1 SPATA3-AS1    | -      |
| ENSG00000238063 | 5.13E-15 | -2.63127 | 1 | 1 RP11-329N22.1 | -      |
| ENSG00000238065 | 5.13E-15 | -2.63127 | 1 | 1 AC010740.1    | -      |
| ENSG00000238066 | 5.13E-15 | -2.63127 | 1 | 1 RP3-378P9.1   | -      |
| ENSG00000238067 | 5.13E-15 | -2.63127 | 1 | 1 XKRYP1        | -      |
| ENSG00000238068 | 5.13E-15 | -2.63127 | 1 | 1 ZNF630-AS1    | -      |
| ENSG00000238069 | 5.13E-15 | -2.63127 | 1 | 1 RPLPOP7       | K02941 |
| ENSG00000238073 | 5.13E-15 | -2.63127 | 1 | 1 RBMY2HP       | K12885 |
| ENSG00000238074 | 5.13E-15 | -2.63127 | 1 | 1 TSPY6P        | K11284 |
| ENSG00000238075 | 5.13E-15 | -2.63127 | 1 | 1 AC087431.1    | K02998 |
| ENSG00000238076 | 5.13E-15 | -2.63127 | 1 | 1 MRPL48P1      | K17429 |
| ENSG00000238077 | 5.13E-15 | -2.63127 | 1 | 1 NMNAT1P3      | K06210 |
| ENSG00000238078 | 5.13E-15 | -2.63127 | 1 | 1 RP11-295M18.2 | -      |
| ENSG00000238079 | 5.13E-15 | -2.63127 | 1 | 1 RP11-72I2.1   | -      |
| ENSG00000238081 | 5.13E-15 | -2.63127 | 1 | 1 RP4-620F22.3  | -      |
| ENSG00000238082 | 5.13E-15 | -2.63127 | 1 | 1 AC009948.7    | -      |
| ENSG00000238085 | 5.13E-15 | -2.63127 | 1 | 1 RP11-435F13.2 | K02942 |
| ENSG00000238086 | 5.13E-15 | -2.63127 | 1 | 1 PPP1R26P1     | K17565 |
| ENSG00000238087 | 5.13E-15 | -2.63127 | 1 | 1 FMO8P         | K00485 |
| ENSG00000238088 | 5.13E-15 | -2.63127 | 1 | 1 OFD1P7Y       | K16480 |
| ENSG00000238090 | 5.13E-15 | -2.63127 | 1 | 1 AC006195.2    | K16779 |
| ENSG00000238091 | 5.13E-15 | -2.63127 | 1 | 1 AC016745.1    | -      |
| ENSG00000238092 | 5.13E-15 | -2.63127 | 1 | 1 CEACAMP6      | K06500 |
| ENSG00000238094 | 5.13E-15 | -2.63127 | 1 | 1 AC009892.5    | -      |
| ENSG00000238102 | 5.13E-15 | -2.63127 | 1 | 1 RP11-19D2.1   | -      |
| ENSG00000238106 | 5.13E-15 | -2.63127 | 1 | 1 RP11-402P6.7  | -      |
| ENSG00000238107 | 5.13E-15 | -2.63127 | 1 | 1 RP11-495P10.5 | -      |
| ENSG00000238108 | 5.13E-15 | -2.63127 | 1 | 1 RP11-463J7.3  | -      |
| ENSG00000238110 | 5.13E-15 | -2.63127 | 1 | 1 RP11-350E12.5 | -      |

|                 |          |          |   |                    |        |
|-----------------|----------|----------|---|--------------------|--------|
| ENSG00000238111 | 5.13E-15 | -2.63127 | 1 | 1 AC066692.3       | K02953 |
| ENSG00000238116 | 5.13E-15 | -2.63127 | 1 | 1 RP3-347M6.2      | K06670 |
| ENSG00000238117 | 5.13E-15 | -2.63127 | 1 | 1 AP004372.1       | -      |
| ENSG00000238118 | 5.13E-15 | -2.63127 | 1 | 1 SLC25A24P2       | K14684 |
| ENSG00000238121 | 5.13E-15 | -2.63127 | 1 | 1 LINC00426        | -      |
| ENSG00000238124 | 5.13E-15 | -2.63127 | 1 | 1 RP11-667F9.2     | -      |
| ENSG00000238125 | 5.13E-15 | -2.63127 | 1 | 1 SLC9A3P2         | K12040 |
| ENSG00000238127 | 5.13E-15 | -2.63127 | 1 | 1 RP11-552J9.15    | K00819 |
| ENSG00000238129 | 5.13E-15 | -2.63127 | 1 | 1 RP3-410C9.2      | -      |
| ENSG00000238131 | 5.13E-15 | -2.63127 | 1 | 1 RP11-806J6.1     | -      |
| ENSG00000238132 | 5.13E-15 | -2.63127 | 1 | 1 CASC4P1          | -      |
| ENSG00000238135 | 5.13E-15 | -2.63127 | 1 | 1 USP9YP10         | -      |
| ENSG00000238137 | 5.13E-15 | -2.63127 | 1 | 1 ARPC3P2          | K05756 |
| ENSG00000238138 | 5.13E-15 | -2.63127 | 1 | 1 AC027124.3       | -      |
| ENSG00000238139 | 5.13E-15 | -2.63127 | 1 | 1 RP11-393N21.1    | K13126 |
| ENSG00000238141 | 5.13E-15 | -2.63127 | 1 | 1 BRWD1-AS1        | -      |
| ENSG00000238142 | 5.13E-15 | -2.63127 | 1 | 1 RP11-108M9.4     | -      |
| ENSG00000238143 | 5.13E-15 | -2.63127 | 1 | 1 RP11-70K10.2     | K04969 |
| ENSG00000238145 | 5.13E-15 | -2.63127 | 1 | 1 RP11-346M5.1     | K07374 |
| ENSG00000238149 | 5.13E-15 | -2.63127 | 1 | 1 AC104978.1       | K02957 |
| ENSG00000238150 | 5.13E-15 | -2.63127 | 1 | 1 AC008753.3       | K02942 |
| ENSG00000238151 | 5.13E-15 | -2.63127 | 1 | 1 MLLT10P1         | -      |
| ENSG00000238152 | 5.13E-15 | -2.63127 | 1 | 1 OR7E140P         | K04257 |
| ENSG00000238153 | 5.13E-15 | -2.63127 | 1 | 1 CTA-714B7.4      | K12465 |
| ENSG00000238154 | 5.13E-15 | -2.63127 | 1 | 1 USP9YP4          | K11840 |
| ENSG00000238156 | 5.13E-15 | -2.63127 | 1 | 1 RP11-415D17.4    | -      |
| ENSG00000238158 | 5.13E-15 | -2.63127 | 1 | 1 RP11-420L9.4     | -      |
| ENSG00000238161 | 5.13E-15 | -2.63127 | 1 | 1 OR7E117P         | K04257 |
| ENSG00000238162 | 5.13E-15 | -2.63127 | 1 | 1 AC009237.4       | K12019 |
| ENSG00000238166 | 5.13E-15 | -2.63127 | 1 | 1 RP11-160C18.4    | -      |
| ENSG00000238168 | 5.13E-15 | -2.63127 | 1 | 1 RP11-686G8.1     | K06566 |
| ENSG00000238169 | 5.13E-15 | -2.63127 | 1 | 1 LINC01053        | -      |
| ENSG00000238172 | 5.13E-15 | -2.63127 | 1 | 1 RPS2P35          | K02981 |
| ENSG00000238173 | 5.13E-15 | -2.63127 | 1 | 1 RPL39P6          | K02924 |
| ENSG00000238176 | 5.13E-15 | -2.63127 | 1 | 1 RP11-322I2.1     | -      |
| ENSG00000238180 | 5.13E-15 | -2.63127 | 1 | 1 AC017079.4       | K02889 |
| ENSG00000238183 | 5.13E-15 | -2.63127 | 1 | 1 RPS27P5          | K02978 |
| ENSG00000238185 | 5.13E-15 | -2.63127 | 1 | 1 RP11-252M21.6    | -      |
| ENSG00000238186 | 5.13E-15 | -2.63127 | 1 | 1 RP11-656D10.6    | -      |
| ENSG00000238188 | 5.13E-15 | -2.63127 | 1 | 1 RP5-875H3.2      | -      |
| ENSG00000238189 | 5.13E-15 | -2.63127 | 1 | 1 ENOX1-AS2        | -      |
| ENSG00000238190 | 5.13E-15 | -2.63127 | 1 | 1 HMGB1P15         | K10802 |
| ENSG00000238191 | 5.13E-15 | -2.63127 | 1 | 1 CLUHP1           | -      |
| ENSG00000238192 | 5.13E-15 | -2.63127 | 1 | 1 LL22NC03-121E8.4 | -      |
| ENSG00000238193 | 5.13E-15 | -2.63127 | 1 | 1 RP11-555H23.1    | K07509 |
| ENSG00000238194 | 5.13E-15 | -2.63127 | 1 | 1 RP4-719C8.1      | -      |
| ENSG00000238195 | 5.13E-15 | -2.63127 | 1 | 1 CTA-503F6.2      | -      |
| ENSG00000238200 | 5.13E-15 | -2.63127 | 1 | 1 RP13-36C9.5      | K00736 |
| ENSG00000238201 | 5.13E-15 | -2.63127 | 1 | 1 AC114752.3       | -      |
| ENSG00000238202 | 5.13E-15 | -2.63127 | 1 | 1 AC002465.2       | -      |
| ENSG00000238205 | 5.13E-15 | -2.63127 | 1 | 1 MPC1L            | -      |
| ENSG00000238207 | 5.13E-15 | -2.63127 | 1 | 1 AC009312.1       | -      |
| ENSG00000238208 | 5.13E-15 | -2.63127 | 1 | 1 RP11-112N13.1    | -      |
| ENSG00000238210 | 5.13E-15 | -2.63127 | 1 | 1 RP13-210D15.4    | -      |
| ENSG00000238211 | 5.13E-15 | -2.63127 | 1 | 1 POLR2LP          | K03007 |
| ENSG00000238212 | 5.13E-15 | -2.63127 | 1 | 1 AC005863.2       | -      |
| ENSG00000238213 | 5.13E-15 | -2.63127 | 1 | 1 TARDBPP2         | -      |
| ENSG00000238215 | 5.13E-15 | -2.63127 | 1 | 1 RP11-167P22.5    | -      |

|                 |          |          |   |                 |        |
|-----------------|----------|----------|---|-----------------|--------|
| ENSG00000238217 | 5.13E-15 | -2.63127 | 1 | 1 AC093590.1    | -      |
| ENSG00000238223 | 5.13E-15 | -2.63127 | 1 | 1 RP6-204F4.2   | K09228 |
| ENSG00000238224 | 5.13E-15 | -2.63127 | 1 | 1 RP11-522M21.2 | -      |
| ENSG00000238225 | 5.13E-15 | -2.63127 | 1 | 1 CRIP1P2       | -      |
| ENSG00000238228 | 5.13E-15 | -2.63127 | 1 | 1 OR7E7P        | K04257 |
| ENSG00000238230 | 5.13E-15 | -2.63127 | 1 | 1 LINC00391     | -      |
| ENSG00000238232 | 5.13E-15 | -2.63127 | 1 | 1 RP11-95P13.2  | -      |
| ENSG00000238235 | 5.13E-15 | -2.63127 | 1 | 1 TSPY11P       | K11284 |
| ENSG00000238236 | 5.13E-15 | -2.63127 | 1 | 1 RP4-534P7.2   | -      |
| ENSG00000238240 | 5.13E-15 | -2.63127 | 1 | 1 RP4-740C4.5   | K11100 |
| ENSG00000238241 | 5.13E-15 | -2.63127 | 1 | 1 CCR12P        | K04305 |
| ENSG00000238242 | 5.13E-15 | -2.63127 | 1 | 1 RP11-575B7.3  | -      |
| ENSG00000238243 | 5.13E-15 | -2.63127 | 1 | 1 OR2W3         | K04257 |
| ENSG00000238246 | 5.13E-15 | -2.63127 | 1 | 1 RP11-575A19.2 | -      |
| ENSG00000238247 | 5.13E-15 | -2.63127 | 1 | 1 GS1-309P15.4  | K05762 |
| ENSG00000238249 | 5.13E-15 | -2.63127 | 1 | 1 HMGN2P17      | K11300 |
| ENSG00000238250 | 5.13E-15 | -2.63127 | 1 | 1 ST6GAL2-IT1   | -      |
| ENSG00000238254 | 5.13E-15 | -2.63127 | 1 | 1 CTC-431G16.3  | K02866 |
| ENSG00000238256 | 5.13E-15 | -2.63127 | 1 | 1 MTND5P20      | K03883 |
| ENSG00000238257 | 5.13E-15 | -2.63127 | 1 | 1 AP000244.11   | -      |
| ENSG00000238259 | 5.13E-15 | -2.63127 | 1 | 1 AC067940.1    | K12834 |
| ENSG00000238262 | 5.13E-15 | -2.63127 | 1 | 1 NTM-IT        | -      |
| ENSG00000238263 | 5.13E-15 | -2.63127 | 1 | 1 RP11-402L1.12 | K02889 |
| ENSG00000238265 | 5.13E-15 | -2.63127 | 1 | 1 LINC00317     | -      |
| ENSG00000238267 | 5.13E-15 | -2.63127 | 1 | 1 RP11-241K18.2 | K11508 |
| ENSG00000238270 | 5.13E-15 | -2.63127 | 1 | 1 RP11-445J9.1  | -      |
| ENSG00000238275 | 5.13E-15 | -2.63127 | 1 | 1 HOMER2P2      | K15010 |
| ENSG00000238276 | 5.13E-15 | -2.63127 | 1 | 1 RP11-245J24.1 | -      |
| ENSG00000238277 | 5.13E-15 | -2.63127 | 1 | 1 AC068483.1    | -      |
| ENSG00000238282 | 5.13E-15 | -2.63127 | 1 | 1 RP5-1164C1.2  | -      |
| ENSG00000238283 | 5.13E-15 | -2.63127 | 1 | 1 TBC1D3P1      | K11837 |
| ENSG00000238284 | 5.13E-15 | -2.63127 | 1 | 1 AC027269.2    | -      |
| ENSG00000238285 | 5.13E-15 | -2.63127 | 1 | 1 MRPL50P2      | K17431 |
| ENSG00000238286 | 5.13E-15 | -2.63127 | 1 | 1 SLC35E1P1     | K15283 |
| ENSG00000238287 | 5.13E-15 | -2.63127 | 1 | 1 RP11-656D10.3 | -      |
| ENSG00000238288 | 5.13E-15 | -2.63127 | 1 | 1 RP11-100G15.4 | K03880 |
| ENSG00000238290 | 5.13E-15 | -2.63127 | 1 | 1 RP11-431K24.1 | -      |
| ENSG00000238291 | 5.13E-15 | -2.63127 | 1 | 1 RP11-94M14.3  | -      |
| ENSG00000238294 | 5.13E-15 | -2.63127 | 1 | 1 snoU13        | -      |
| ENSG00000238295 | 5.13E-15 | -2.63127 | 1 | 1 snoU13        | -      |
| ENSG00000238296 | 5.13E-15 | -2.63127 | 1 | 1 snoU13        | -      |
| ENSG00000238297 | 5.13E-15 | -2.63127 | 1 | 1 U3            | -      |
| ENSG00000238300 | 5.13E-15 | -2.63127 | 1 | 1 SNORD121B     | -      |
| ENSG00000238301 | 5.13E-15 | -2.63127 | 1 | 1 snoU13        | -      |
| ENSG00000238302 | 5.13E-15 | -2.63127 | 1 | 1 RNU7-120P     | -      |
| ENSG00000238304 | 5.13E-15 | -2.63127 | 1 | 1 RNU7-50P      | -      |
| ENSG00000238306 | 5.13E-15 | -2.63127 | 1 | 1 snoU13        | -      |
| ENSG00000238309 | 5.13E-15 | -2.63127 | 1 | 1 snoU13        | -      |
| ENSG00000238310 | 5.13E-15 | -2.63127 | 1 | 1 RNU7-122P     | -      |
| ENSG00000238312 | 5.13E-15 | -2.63127 | 1 | 1 snoU13        | -      |
| ENSG00000238313 | 5.13E-15 | -2.63127 | 1 | 1 snoU13        | -      |
| ENSG00000238314 | 5.13E-15 | -2.63127 | 1 | 1 snoU13        | -      |
| ENSG00000238316 | 5.13E-15 | -2.63127 | 1 | 1 snoU13        | -      |
| ENSG00000238318 | 5.13E-15 | -2.63127 | 1 | 1 snoU13        | -      |
| ENSG00000238319 | 5.13E-15 | -2.63127 | 1 | 1 snoU13        | -      |
| ENSG00000238320 | 5.13E-15 | -2.63127 | 1 | 1 AC027612.2    | -      |
| ENSG00000238321 | 5.13E-15 | -2.63127 | 1 | 1 snoU13        | -      |
| ENSG00000238323 | 5.13E-15 | -2.63127 | 1 | 1 AC068587.1    | -      |

|                 |          |          |   |                 |    |
|-----------------|----------|----------|---|-----------------|----|
| ENSG00000238324 | 5.13E-15 | -2.63127 | 1 | 1 RN7SKP198     | -- |
| ENSG00000238325 | 5.13E-15 | -2.63127 | 1 | 1 snoU13        | -- |
| ENSG00000238326 | 5.13E-15 | -2.63127 | 1 | 1 snoU13        | -- |
| ENSG00000238327 | 5.13E-15 | -2.63127 | 1 | 1 snoU13        | -- |
| ENSG00000238328 | 5.13E-15 | -2.63127 | 1 | 1 snoU13        | -- |
| ENSG00000238330 | 5.13E-15 | -2.63127 | 1 | 1 snoU13        | -- |
| ENSG00000238331 | 5.13E-15 | -2.63127 | 1 | 1 AC100791.2    | -- |
| ENSG00000238333 | 5.13E-15 | -2.63127 | 1 | 1 RNU7-145P     | -- |
| ENSG00000238335 | 5.13E-15 | -2.63127 | 1 | 1 AC008869.1    | -- |
| ENSG00000238337 | 5.13E-15 | -2.63127 | 1 | 1 snoU13        | -- |
| ENSG00000238339 | 5.13E-15 | -2.63127 | 1 | 1 snoU13        | -- |
| ENSG00000238340 | 5.13E-15 | -2.63127 | 1 | 1 AC055876.2    | -- |
| ENSG00000238341 | 5.13E-15 | -2.63127 | 1 | 1 snoU13        | -- |
| ENSG00000238342 | 5.13E-15 | -2.63127 | 1 | 1 snoU13        | -- |
| ENSG00000238344 | 5.13E-15 | -2.63127 | 1 | 1 SNORD126      | -- |
| ENSG00000238345 | 5.13E-15 | -2.63127 | 1 | 1 snoU13        | -- |
| ENSG00000238347 | 5.13E-15 | -2.63127 | 1 | 1 AC100757.1    | -- |
| ENSG00000238348 | 5.13E-15 | -2.63127 | 1 | 1 snoU13        | -- |
| ENSG00000238351 | 5.13E-15 | -2.63127 | 1 | 1 snoU13        | -- |
| ENSG00000238352 | 5.13E-15 | -2.63127 | 1 | 1 snoU13        | -- |
| ENSG00000238354 | 5.13E-15 | -2.63127 | 1 | 1 snoU13        | -- |
| ENSG00000238355 | 5.13E-15 | -2.63127 | 1 | 1 snoU13        | -- |
| ENSG00000238357 | 5.13E-15 | -2.63127 | 1 | 1 RNU7-148P     | -- |
| ENSG00000238358 | 5.13E-15 | -2.63127 | 1 | 1 RP5-1121E10.2 | -- |
| ENSG00000238359 | 5.13E-15 | -2.63127 | 1 | 1 snoU13        | -- |
| ENSG00000238361 | 5.13E-15 | -2.63127 | 1 | 1 snoU13        | -- |
| ENSG00000238362 | 5.13E-15 | -2.63127 | 1 | 1 AL158147.1    | -- |
| ENSG00000238365 | 5.13E-15 | -2.63127 | 1 | 1 RNU7-57P      | -- |
| ENSG00000238366 | 5.13E-15 | -2.63127 | 1 | 1 Y_RNA         | -- |
| ENSG00000238367 | 5.13E-15 | -2.63127 | 1 | 1 MIR2113       | -- |
| ENSG00000238368 | 5.13E-15 | -2.63127 | 1 | 1 snoU13        | -- |
| ENSG00000238370 | 5.13E-15 | -2.63127 | 1 | 1 RNU7-103P     | -- |
| ENSG00000238371 | 5.13E-15 | -2.63127 | 1 | 1 snoU13        | -- |
| ENSG00000238372 | 5.13E-15 | -2.63127 | 1 | 1 snoU13        | -- |
| ENSG00000238374 | 5.13E-15 | -2.63127 | 1 | 1 RNU7-180P     | -- |
| ENSG00000238375 | 5.13E-15 | -2.63127 | 1 | 1 snoU13        | -- |
| ENSG00000238376 | 5.13E-15 | -2.63127 | 1 | 1 snoU13        | -- |
| ENSG00000238377 | 5.13E-15 | -2.63127 | 1 | 1 SNORD61       | -- |
| ENSG00000238379 | 5.13E-15 | -2.63127 | 1 | 1 RNA5SP103     | -- |
| ENSG00000238380 | 5.13E-15 | -2.63127 | 1 | 1 RNU7-165P     | -- |
| ENSG00000238382 | 5.13E-15 | -2.63127 | 1 | 1 RNU6-1211P    | -- |
| ENSG00000238383 | 5.13E-15 | -2.63127 | 1 | 1 snoU13        | -- |
| ENSG00000238384 | 5.13E-15 | -2.63127 | 1 | 1 snoU13        | -- |
| ENSG00000238385 | 5.13E-15 | -2.63127 | 1 | 1 AC004458.1    | -- |
| ENSG00000238387 | 5.13E-15 | -2.63127 | 1 | 1 snoU13        | -- |
| ENSG00000238388 | 5.13E-15 | -2.63127 | 1 | 1 snoU13        | -- |
| ENSG00000238389 | 5.13E-15 | -2.63127 | 1 | 1 snoU13        | -- |
| ENSG00000238391 | 5.13E-15 | -2.63127 | 1 | 1 RNA5SP233     | -- |
| ENSG00000238392 | 5.13E-15 | -2.63127 | 1 | 1 AC093668.1    | -- |
| ENSG00000238393 | 5.13E-15 | -2.63127 | 1 | 1 AC009009.1    | -- |
| ENSG00000238394 | 5.13E-15 | -2.63127 | 1 | 1 snoU13        | -- |
| ENSG00000238395 | 5.13E-15 | -2.63127 | 1 | 1 snoU13        | -- |
| ENSG00000238397 | 5.13E-15 | -2.63127 | 1 | 1 RNU6-368P     | -- |
| ENSG00000238398 | 5.13E-15 | -2.63127 | 1 | 1 snoU13        | -- |
| ENSG00000238399 | 5.13E-15 | -2.63127 | 1 | 1 MIR2053       | -- |
| ENSG00000238400 | 5.13E-15 | -2.63127 | 1 | 1 snoU13        | -- |
| ENSG00000238401 | 5.13E-15 | -2.63127 | 1 | 1 snoU13        | -- |
| ENSG00000238402 | 5.13E-15 | -2.63127 | 1 | 1 snoU13        | -- |

|                 |          |          |   |              |    |
|-----------------|----------|----------|---|--------------|----|
| ENSG00000238405 | 5.13E-15 | -2.63127 | 1 | 1 RNA5SP311  | -- |
| ENSG00000238407 | 5.13E-15 | -2.63127 | 1 | 1 snoU13     | -- |
| ENSG00000238408 | 5.13E-15 | -2.63127 | 1 | 1 snoU13     | -- |
| ENSG00000238409 | 5.13E-15 | -2.63127 | 1 | 1 snoU13     | -- |
| ENSG00000238410 | 5.13E-15 | -2.63127 | 1 | 1 snoU109    | -- |
| ENSG00000238411 | 5.13E-15 | -2.63127 | 1 | 1 CR381670.1 | -- |
| ENSG00000238412 | 5.13E-15 | -2.63127 | 1 | 1 AL589947.1 | -- |
| ENSG00000238413 | 5.13E-15 | -2.63127 | 1 | 1 Y_RNA      | -- |
| ENSG00000238414 | 5.13E-15 | -2.63127 | 1 | 1 snoU13     | -- |
| ENSG00000238415 | 5.13E-15 | -2.63127 | 1 | 1 RNU6-538P  | -- |
| ENSG00000238416 | 5.13E-15 | -2.63127 | 1 | 1 snoU13     | -- |
| ENSG00000238417 | 5.13E-15 | -2.63127 | 1 | 1 RNU7-63P   | -- |
| ENSG00000238418 | 5.13E-15 | -2.63127 | 1 | 1 snoU13     | -- |
| ENSG00000238419 | 5.13E-15 | -2.63127 | 1 | 1 RNU7-186P  | -- |
| ENSG00000238420 | 5.13E-15 | -2.63127 | 1 | 1 RNU6-437P  | -- |
| ENSG00000238422 | 5.13E-15 | -2.63127 | 1 | 1 snoU13     | -- |
| ENSG00000238423 | 5.13E-15 | -2.63127 | 1 | 1 SNORD42B   | -- |
| ENSG00000238424 | 5.13E-15 | -2.63127 | 1 | 1 AC190387.1 | -- |
| ENSG00000238425 | 5.13E-15 | -2.63127 | 1 | 1 snoU13     | -- |
| ENSG00000238426 | 5.13E-15 | -2.63127 | 1 | 1 Y_RNA      | -- |
| ENSG00000238427 | 5.13E-15 | -2.63127 | 1 | 1 RNU7-136P  | -- |
| ENSG00000238428 | 5.13E-15 | -2.63127 | 1 | 1 snoU13     | -- |
| ENSG00000238430 | 5.13E-15 | -2.63127 | 1 | 1 snoU13     | -- |
| ENSG00000238431 | 5.13E-15 | -2.63127 | 1 | 1 RNU7-157P  | -- |
| ENSG00000238433 | 5.13E-15 | -2.63127 | 1 | 1 snoU13     | -- |
| ENSG00000238436 | 5.13E-15 | -2.63127 | 1 | 1 snoU13     | -- |
| ENSG00000238437 | 5.13E-15 | -2.63127 | 1 | 1 snoU13     | -- |
| ENSG00000238438 | 5.13E-15 | -2.63127 | 1 | 1 snoU13     | -- |
| ENSG00000238440 | 5.13E-15 | -2.63127 | 1 | 1 snoU13     | -- |
| ENSG00000238441 | 5.13E-15 | -2.63127 | 1 | 1 RNU7-130P  | -- |
| ENSG00000238442 | 5.13E-15 | -2.63127 | 1 | 1 CR383657.1 | -- |
| ENSG00000238443 | 5.13E-15 | -2.63127 | 1 | 1 Y_RNA      | -- |
| ENSG00000238444 | 5.13E-15 | -2.63127 | 1 | 1 RNU6-893P  | -- |
| ENSG00000238445 | 5.13E-15 | -2.63127 | 1 | 1 snoU13     | -- |
| ENSG00000238446 | 5.13E-15 | -2.63127 | 1 | 1 RNU7-38P   | -- |
| ENSG00000238447 | 5.13E-15 | -2.63127 | 1 | 1 RNU7-134P  | -- |
| ENSG00000238448 | 5.13E-15 | -2.63127 | 1 | 1 AL121652.2 | -- |
| ENSG00000238449 | 5.13E-15 | -2.63127 | 1 | 1 AC019131.1 | -- |
| ENSG00000238450 | 5.13E-15 | -2.63127 | 1 | 1 snoU13     | -- |
| ENSG00000238451 | 5.13E-15 | -2.63127 | 1 | 1 snoU13     | -- |
| ENSG00000238452 | 5.13E-15 | -2.63127 | 1 | 1 RNU7-144P  | -- |
| ENSG00000238453 | 5.13E-15 | -2.63127 | 1 | 1 snoU13     | -- |
| ENSG00000238455 | 5.13E-15 | -2.63127 | 1 | 1 snoU13     | -- |
| ENSG00000238456 | 5.13E-15 | -2.63127 | 1 | 1 RNU6-1014P | -- |
| ENSG00000238457 | 5.13E-15 | -2.63127 | 1 | 1 RNU7-169P  | -- |
| ENSG00000238458 | 5.13E-15 | -2.63127 | 1 | 1 snoU13     | -- |
| ENSG00000238459 | 5.13E-15 | -2.63127 | 1 | 1 snoU13     | -- |
| ENSG00000238460 | 5.13E-15 | -2.63127 | 1 | 1 AC068587.2 | -- |
| ENSG00000238462 | 5.13E-15 | -2.63127 | 1 | 1 snoU13     | -- |
| ENSG00000238463 | 5.13E-15 | -2.63127 | 1 | 1 snoU13     | -- |
| ENSG00000238464 | 5.13E-15 | -2.63127 | 1 | 1 snoU13     | -- |
| ENSG00000238466 | 5.13E-15 | -2.63127 | 1 | 1 snoU13     | -- |
| ENSG00000238468 | 5.13E-15 | -2.63127 | 1 | 1 RNU7-14P   | -- |
| ENSG00000238469 | 5.13E-15 | -2.63127 | 1 | 1 AC091487.1 | -- |
| ENSG00000238470 | 5.13E-15 | -2.63127 | 1 | 1 AC097361.1 | -- |
| ENSG00000238472 | 5.13E-15 | -2.63127 | 1 | 1 snoU13     | -- |
| ENSG00000238473 | 5.13E-15 | -2.63127 | 1 | 1 snoU13     | -- |
| ENSG00000238474 | 5.13E-15 | -2.63127 | 1 | 1 snoU13     | -- |



|                 |          |          |   |              |    |
|-----------------|----------|----------|---|--------------|----|
| ENSG00000238478 | 5.13E-15 | -2.63127 | 1 | 1 RNU6-498P  | -- |
| ENSG00000238480 | 5.13E-15 | -2.63127 | 1 | 1 snoU13     | -- |
| ENSG00000238481 | 5.13E-15 | -2.63127 | 1 | 1 snoU13     | -- |
| ENSG00000238482 | 5.13E-15 | -2.63127 | 1 | 1 RNU6-1208P | -- |
| ENSG00000238483 | 5.13E-15 | -2.63127 | 1 | 1 snoU13     | -- |
| ENSG00000238484 | 5.13E-15 | -2.63127 | 1 | 1 snoU13     | -- |
| ENSG00000238485 | 5.13E-15 | -2.63127 | 1 | 1 snoU13     | -- |
| ENSG00000238486 | 5.13E-15 | -2.63127 | 1 | 1 snoU13     | -- |
| ENSG00000238487 | 5.13E-15 | -2.63127 | 1 | 1 RNU7-114P  | -- |
| ENSG00000238488 | 5.13E-15 | -2.63127 | 1 | 1 snoU13     | -- |
| ENSG00000238489 | 5.13E-15 | -2.63127 | 1 | 1 RNU6-749P  | -- |
| ENSG00000238490 | 5.13E-15 | -2.63127 | 1 | 1 Y_RNA      | -- |
| ENSG00000238491 | 5.13E-15 | -2.63127 | 1 | 1 snoU13     | -- |
| ENSG00000238492 | 5.13E-15 | -2.63127 | 1 | 1 snoU13     | -- |
| ENSG00000238493 | 5.13E-15 | -2.63127 | 1 | 1 RNU6-221P  | -- |
| ENSG00000238494 | 5.13E-15 | -2.63127 | 1 | 1 snoU13     | -- |
| ENSG00000238496 | 5.13E-15 | -2.63127 | 1 | 1 snoU13     | -- |
| ENSG00000238498 | 5.13E-15 | -2.63127 | 1 | 1 snoU13     | -- |
| ENSG00000238500 | 5.13E-15 | -2.63127 | 1 | 1 RNU7-87P   | -- |
| ENSG00000238501 | 5.13E-15 | -2.63127 | 1 | 1 snoU13     | -- |
| ENSG00000238502 | 5.13E-15 | -2.63127 | 1 | 1 snoU13     | -- |
| ENSG00000238503 | 5.13E-15 | -2.63127 | 1 | 1 SNORD18    | -- |
| ENSG00000238504 | 5.13E-15 | -2.63127 | 1 | 1 AP005638.1 | -- |
| ENSG00000238506 | 5.13E-15 | -2.63127 | 1 | 1 snoU13     | -- |
| ENSG00000238507 | 5.13E-15 | -2.63127 | 1 | 1 snoU13     | -- |
| ENSG00000238508 | 5.13E-15 | -2.63127 | 1 | 1 AC024569.1 | -- |
| ENSG00000238509 | 5.13E-15 | -2.63127 | 1 | 1 RNU6-104P  | -- |
| ENSG00000238511 | 5.13E-15 | -2.63127 | 1 | 1 snoU13     | -- |
| ENSG00000238512 | 5.13E-15 | -2.63127 | 1 | 1 AC117401.1 | -- |
| ENSG00000238513 | 5.13E-15 | -2.63127 | 1 | 1 snoU13     | -- |
| ENSG00000238514 | 5.13E-15 | -2.63127 | 1 | 1 snoU13     | -- |
| ENSG00000238515 | 5.13E-15 | -2.63127 | 1 | 1 snoU13     | -- |
| ENSG00000238516 | 5.13E-15 | -2.63127 | 1 | 1 Y_RNA      | -- |
| ENSG00000238517 | 5.13E-15 | -2.63127 | 1 | 1 MIR1270-1  | -- |
| ENSG00000238518 | 5.13E-15 | -2.63127 | 1 | 1 AC020900.1 | -- |
| ENSG00000238519 | 5.13E-15 | -2.63127 | 1 | 1 U8         | -- |
| ENSG00000238520 | 5.13E-15 | -2.63127 | 1 | 1 snoU13     | -- |
| ENSG00000238521 | 5.13E-15 | -2.63127 | 1 | 1 snoU13     | -- |
| ENSG00000238522 | 5.13E-15 | -2.63127 | 1 | 1 snoU13     | -- |
| ENSG00000238523 | 5.13E-15 | -2.63127 | 1 | 1 RNU7-107P  | -- |
| ENSG00000238525 | 5.13E-15 | -2.63127 | 1 | 1 snoU13     | -- |
| ENSG00000238526 | 5.13E-15 | -2.63127 | 1 | 1 snoU13     | -- |
| ENSG00000238529 | 5.13E-15 | -2.63127 | 1 | 1 RNU6-599P  | -- |
| ENSG00000238530 | 5.13E-15 | -2.63127 | 1 | 1 snoU13     | -- |
| ENSG00000238531 | 5.13E-15 | -2.63127 | 1 | 1 SNORD105B  | -- |
| ENSG00000238532 | 5.13E-15 | -2.63127 | 1 | 1 AL355794.1 | -- |
| ENSG00000238535 | 5.13E-15 | -2.63127 | 1 | 1 snoU13     | -- |
| ENSG00000238536 | 5.13E-15 | -2.63127 | 1 | 1 snoU13     | -- |
| ENSG00000238537 | 5.13E-15 | -2.63127 | 1 | 1 snoU13     | -- |
| ENSG00000238538 | 5.13E-15 | -2.63127 | 1 | 1 snoU13     | -- |
| ENSG00000238540 | 5.13E-15 | -2.63127 | 1 | 1 RNU7-93P   | -- |
| ENSG00000238542 | 5.13E-15 | -2.63127 | 1 | 1 RNU7-104P  | -- |
| ENSG00000238543 | 5.13E-15 | -2.63127 | 1 | 1 snoU13     | -- |
| ENSG00000238544 | 5.13E-15 | -2.63127 | 1 | 1 snoU13     | -- |
| ENSG00000238545 | 5.13E-15 | -2.63127 | 1 | 1 snoU13     | -- |
| ENSG00000238546 | 5.13E-15 | -2.63127 | 1 | 1 snoU13     | -- |
| ENSG00000238551 | 5.13E-15 | -2.63127 | 1 | 1 RNU6-1193P | -- |
| ENSG00000238552 | 5.13E-15 | -2.63127 | 1 | 1 snoU13     | -- |

|                 |          |          |   |               |    |
|-----------------|----------|----------|---|---------------|----|
| ENSG00000238553 | 5.13E-15 | -2.63127 | 1 | 1 AF213884.3  | -- |
| ENSG00000238554 | 5.13E-15 | -2.63127 | 1 | 1 RNU1-88P    | -- |
| ENSG00000238556 | 5.13E-15 | -2.63127 | 1 | 1 snoU13      | -- |
| ENSG00000238557 | 5.13E-15 | -2.63127 | 1 | 1 snoU13      | -- |
| ENSG00000238558 | 5.13E-15 | -2.63127 | 1 | 1 RNU7-21P    | -- |
| ENSG00000238559 | 5.13E-15 | -2.63127 | 1 | 1 snoU13      | -- |
| ENSG00000238560 | 5.13E-15 | -2.63127 | 1 | 1 Y_RNA       | -- |
| ENSG00000238561 | 5.13E-15 | -2.63127 | 1 | 1 RNU6ATAC28P | -- |
| ENSG00000238562 | 5.13E-15 | -2.63127 | 1 | 1 RNU7-159P   | -- |
| ENSG00000238563 | 5.13E-15 | -2.63127 | 1 | 1 snoU13      | -- |
| ENSG00000238564 | 5.13E-15 | -2.63127 | 1 | 1 snoU13      | -- |
| ENSG00000238565 | 5.13E-15 | -2.63127 | 1 | 1 snoU13      | -- |
| ENSG00000238566 | 5.13E-15 | -2.63127 | 1 | 1 snoU13      | -- |
| ENSG00000238567 | 5.13E-15 | -2.63127 | 1 | 1 snoU13      | -- |
| ENSG00000238568 | 5.13E-15 | -2.63127 | 1 | 1 snoU13      | -- |
| ENSG00000238570 | 5.13E-15 | -2.63127 | 1 | 1 snoU13      | -- |
| ENSG00000238571 | 5.13E-15 | -2.63127 | 1 | 1 snoU13      | -- |
| ENSG00000238572 | 5.13E-15 | -2.63127 | 1 | 1 snoU13      | -- |
| ENSG00000238575 | 5.13E-15 | -2.63127 | 1 | 1 snoU109     | -- |
| ENSG00000238576 | 5.13E-15 | -2.63127 | 1 | 1 snoU13      | -- |
| ENSG00000238577 | 5.13E-15 | -2.63127 | 1 | 1 snoU13      | -- |
| ENSG00000238578 | 5.13E-15 | -2.63127 | 1 | 1 SNORD4A     | -- |
| ENSG00000238579 | 5.13E-15 | -2.63127 | 1 | 1 snoU13      | -- |
| ENSG00000238581 | 5.13E-15 | -2.63127 | 1 | 1 snoU13      | -- |
| ENSG00000238582 | 5.13E-15 | -2.63127 | 1 | 1 snoU13      | -- |
| ENSG00000238584 | 5.13E-15 | -2.63127 | 1 | 1 RNU7-167P   | -- |
| ENSG00000238585 | 5.13E-15 | -2.63127 | 1 | 1 Y_RNA       | -- |
| ENSG00000238587 | 5.13E-15 | -2.63127 | 1 | 1 snoU13      | -- |
| ENSG00000238588 | 5.13E-15 | -2.63127 | 1 | 1 snoU13      | -- |
| ENSG00000238590 | 5.13E-15 | -2.63127 | 1 | 1 RNU7-54P    | -- |
| ENSG00000238591 | 5.13E-15 | -2.63127 | 1 | 1 snoU13      | -- |
| ENSG00000238592 | 5.13E-15 | -2.63127 | 1 | 1 snoU13      | -- |
| ENSG00000238593 | 5.13E-15 | -2.63127 | 1 | 1 AC078785.1  | -- |
| ENSG00000238594 | 5.13E-15 | -2.63127 | 1 | 1 snoU13      | -- |
| ENSG00000238595 | 5.13E-15 | -2.63127 | 1 | 1 snoU13      | -- |
| ENSG00000238596 | 5.13E-15 | -2.63127 | 1 | 1 snoU13      | -- |
| ENSG00000238597 | 5.13E-15 | -2.63127 | 1 | 1 SNORD4B     | -- |
| ENSG00000238598 | 5.13E-15 | -2.63127 | 1 | 1 snoU13      | -- |
| ENSG00000238601 | 5.13E-15 | -2.63127 | 1 | 1 AC040163.1  | -- |
| ENSG00000238603 | 5.13E-15 | -2.63127 | 1 | 1 RNVU1-1     | -- |
| ENSG00000238604 | 5.13E-15 | -2.63127 | 1 | 1 Y_RNA       | -- |
| ENSG00000238605 | 5.13E-15 | -2.63127 | 1 | 1 snoU13      | -- |
| ENSG00000238606 | 5.13E-15 | -2.63127 | 1 | 1 RNU7-7P     | -- |
| ENSG00000238607 | 5.13E-15 | -2.63127 | 1 | 1 AC138749.1  | -- |
| ENSG00000238608 | 5.13E-15 | -2.63127 | 1 | 1 snoU13      | -- |
| ENSG00000238609 | 5.13E-15 | -2.63127 | 1 | 1 RNU7-94P    | -- |
| ENSG00000238610 | 5.13E-15 | -2.63127 | 1 | 1 RNU7-26P    | -- |
| ENSG00000238611 | 5.13E-15 | -2.63127 | 1 | 1 snoU13      | -- |
| ENSG00000238612 | 5.13E-15 | -2.63127 | 1 | 1 snoU13      | -- |
| ENSG00000238615 | 5.13E-15 | -2.63127 | 1 | 1 snoU13      | -- |
| ENSG00000238616 | 5.13E-15 | -2.63127 | 1 | 1 RNU6-300P   | -- |
| ENSG00000238618 | 5.13E-15 | -2.63127 | 1 | 1 snoU13      | -- |
| ENSG00000238619 | 5.13E-15 | -2.63127 | 1 | 1 RNU6-775P   | -- |
| ENSG00000238620 | 5.13E-15 | -2.63127 | 1 | 1 snoU13      | -- |
| ENSG00000238621 | 5.13E-15 | -2.63127 | 1 | 1 TRNAI2      | -- |
| ENSG00000238622 | 5.13E-15 | -2.63127 | 1 | 1 SNORD97     | -- |
| ENSG00000238623 | 5.13E-15 | -2.63127 | 1 | 1 AC073597.1  | -- |
| ENSG00000238624 | 5.13E-15 | -2.63127 | 1 | 1 snoU13      | -- |

|                 |          |          |   |              |    |
|-----------------|----------|----------|---|--------------|----|
| ENSG00000238625 | 5.13E-15 | -2.63127 | 1 | 1 snoU13     | -- |
| ENSG00000238626 | 5.13E-15 | -2.63127 | 1 | 1 snoU13     | -- |
| ENSG00000238627 | 5.13E-15 | -2.63127 | 1 | 1 RNA5SP489  | -- |
| ENSG00000238628 | 5.13E-15 | -2.63127 | 1 | 1 snoU13     | -- |
| ENSG00000238629 | 5.13E-15 | -2.63127 | 1 | 1 snoU13     | -- |
| ENSG00000238630 | 5.13E-15 | -2.63127 | 1 | 1 snoU13     | -- |
| ENSG00000238631 | 5.13E-15 | -2.63127 | 1 | 1 snoU13     | -- |
| ENSG00000238632 | 5.13E-15 | -2.63127 | 1 | 1 RNU7-126P  | -- |
| ENSG00000238634 | 5.13E-15 | -2.63127 | 1 | 1 AE000660.1 | -- |
| ENSG00000238638 | 5.13E-15 | -2.63127 | 1 | 1 AL353626.1 | -- |
| ENSG00000238639 | 5.13E-15 | -2.63127 | 1 | 1 snoU13     | -- |
| ENSG00000238641 | 5.13E-15 | -2.63127 | 1 | 1 AC008122.1 | -- |
| ENSG00000238642 | 5.13E-15 | -2.63127 | 1 | 1 snoU13     | -- |
| ENSG00000238644 | 5.13E-15 | -2.63127 | 1 | 1 AL117380.1 | -- |
| ENSG00000238645 | 5.13E-15 | -2.63127 | 1 | 1 snoU13     | -- |
| ENSG00000238646 | 5.13E-15 | -2.63127 | 1 | 1 snoU13     | -- |
| ENSG00000238648 | 5.13E-15 | -2.63127 | 1 | 1 TRNAI6     | -- |
| ENSG00000238649 | 5.13E-15 | -2.63127 | 1 | 1 SNORD42A   | -- |
| ENSG00000238650 | 5.13E-15 | -2.63127 | 1 | 1 SNORD54    | -- |
| ENSG00000238652 | 5.13E-15 | -2.63127 | 1 | 1 snoU13     | -- |
| ENSG00000238653 | 5.13E-15 | -2.63127 | 1 | 1 RNU7-62P   | -- |
| ENSG00000238654 | 5.13E-15 | -2.63127 | 1 | 1 snoU13     | -- |
| ENSG00000238656 | 5.13E-15 | -2.63127 | 1 | 1 snoU13     | -- |
| ENSG00000238657 | 5.13E-15 | -2.63127 | 1 | 1 snoU13     | -- |
| ENSG00000238658 | 5.13E-15 | -2.63127 | 1 | 1 RNU6-625P  | -- |
| ENSG00000238660 | 5.13E-15 | -2.63127 | 1 | 1 AP001340.1 | -- |
| ENSG00000238661 | 5.13E-15 | -2.63127 | 1 | 1 snoU13     | -- |
| ENSG00000238662 | 5.13E-15 | -2.63127 | 1 | 1 snoU13     | -- |
| ENSG00000238663 | 5.13E-15 | -2.63127 | 1 | 1 snoU13     | -- |
| ENSG00000238666 | 5.13E-15 | -2.63127 | 1 | 1 snoU13     | -- |
| ENSG00000238669 | 5.13E-15 | -2.63127 | 1 | 1 RNU6-333P  | -- |
| ENSG00000238670 | 5.13E-15 | -2.63127 | 1 | 1 snoU13     | -- |
| ENSG00000238672 | 5.13E-15 | -2.63127 | 1 | 1 AC020626.1 | -- |
| ENSG00000238673 | 5.13E-15 | -2.63127 | 1 | 1 snoU13     | -- |
| ENSG00000238674 | 5.13E-15 | -2.63127 | 1 | 1 snoU13     | -- |
| ENSG00000238676 | 5.13E-15 | -2.63127 | 1 | 1 snoU13     | -- |
| ENSG00000238677 | 5.13E-15 | -2.63127 | 1 | 1 RNA5SP58   | -- |
| ENSG00000238679 | 5.13E-15 | -2.63127 | 1 | 1 snoU13     | -- |
| ENSG00000238680 | 5.13E-15 | -2.63127 | 1 | 1 RNU6-1037P | -- |
| ENSG00000238684 | 5.13E-15 | -2.63127 | 1 | 1 snoU13     | -- |
| ENSG00000238685 | 5.13E-15 | -2.63127 | 1 | 1 ACA64      | -- |
| ENSG00000238686 | 5.13E-15 | -2.63127 | 1 | 1 snoU13     | -- |
| ENSG00000238687 | 5.13E-15 | -2.63127 | 1 | 1 snoU13     | -- |
| ENSG00000238688 | 5.13E-15 | -2.63127 | 1 | 1 snoU13     | -- |
| ENSG00000238689 | 5.13E-15 | -2.63127 | 1 | 1 RNU7-166P  | -- |
| ENSG00000238690 | 5.13E-15 | -2.63127 | 1 | 1 snoU13     | -- |
| ENSG00000238691 | 5.13E-15 | -2.63127 | 1 | 1 snoU13     | -- |
| ENSG00000238692 | 5.13E-15 | -2.63127 | 1 | 1 snoU13     | -- |
| ENSG00000238693 | 5.13E-15 | -2.63127 | 1 | 1 snoU13     | -- |
| ENSG00000238694 | 5.13E-15 | -2.63127 | 1 | 1 snoU13     | -- |
| ENSG00000238695 | 5.13E-15 | -2.63127 | 1 | 1 snoU13     | -- |
| ENSG00000238696 | 5.13E-15 | -2.63127 | 1 | 1 snoU13     | -- |
| ENSG00000238697 | 5.13E-15 | -2.63127 | 1 | 1 RNU6-261P  | -- |
| ENSG00000238698 | 5.13E-15 | -2.63127 | 1 | 1 RNU7-147P  | -- |
| ENSG00000238699 | 5.13E-15 | -2.63127 | 1 | 1 snoU13     | -- |
| ENSG00000238701 | 5.13E-15 | -2.63127 | 1 | 1 snoU13     | -- |
| ENSG00000238702 | 5.13E-15 | -2.63127 | 1 | 1 snoU13     | -- |
| ENSG00000238703 | 5.13E-15 | -2.63127 | 1 | 1 snoU13     | -- |

|                 |          |          |   |                |    |
|-----------------|----------|----------|---|----------------|----|
| ENSG00000238704 | 5.13E-15 | -2.63127 | 1 | 1 RNU7-97P     | -- |
| ENSG00000238705 | 5.13E-15 | -2.63127 | 1 | 1 MIR1976      | -- |
| ENSG00000238707 | 5.13E-15 | -2.63127 | 1 | 1 SNORD2       | -- |
| ENSG00000238708 | 5.13E-15 | -2.63127 | 1 | 1 snoU13       | -- |
| ENSG00000238709 | 5.13E-15 | -2.63127 | 1 | 1 RNU7-56P     | -- |
| ENSG00000238712 | 5.13E-15 | -2.63127 | 1 | 1 snoU13       | -- |
| ENSG00000238713 | 5.13E-15 | -2.63127 | 1 | 1 Y_RNA        | -- |
| ENSG00000238714 | 5.13E-15 | -2.63127 | 1 | 1 snoU13       | -- |
| ENSG00000238716 | 5.13E-15 | -2.63127 | 1 | 1 AL031905.1   | -- |
| ENSG00000238717 | 5.13E-15 | -2.63127 | 1 | 1 snoU13       | -- |
| ENSG00000238718 | 5.13E-15 | -2.63127 | 1 | 1 snoU13       | -- |
| ENSG00000238719 | 5.13E-15 | -2.63127 | 1 | 1 RNU7-96P     | -- |
| ENSG00000238721 | 5.13E-15 | -2.63127 | 1 | 1 RNU7-194P    | -- |
| ENSG00000238722 | 5.13E-15 | -2.63127 | 1 | 1 snoU13       | -- |
| ENSG00000238723 | 5.13E-15 | -2.63127 | 1 | 1 Y_RNA        | -- |
| ENSG00000238724 | 5.13E-15 | -2.63127 | 1 | 1 snoU13       | -- |
| ENSG00000238726 | 5.13E-15 | -2.63127 | 1 | 1 AC073648.1   | -- |
| ENSG00000238727 | 5.13E-15 | -2.63127 | 1 | 1 AC099540.1   | -- |
| ENSG00000238728 | 5.13E-15 | -2.63127 | 1 | 1 MIR1972-1    | -- |
| ENSG00000238729 | 5.13E-15 | -2.63127 | 1 | 1 snoU13       | -- |
| ENSG00000238730 | 5.13E-15 | -2.63127 | 1 | 1 RNU7-164P    | -- |
| ENSG00000238731 | 5.13E-15 | -2.63127 | 1 | 1 RNU7-90P     | -- |
| ENSG00000238732 | 5.13E-15 | -2.63127 | 1 | 1 snoU13       | -- |
| ENSG00000238733 | 5.13E-15 | -2.63127 | 1 | 1 snoU13       | -- |
| ENSG00000238734 | 5.13E-15 | -2.63127 | 1 | 1 snoU13       | -- |
| ENSG00000238735 | 5.13E-15 | -2.63127 | 1 | 1 RNU7-113P    | -- |
| ENSG00000238736 | 5.13E-15 | -2.63127 | 1 | 1 snoU13       | -- |
| ENSG00000238737 | 5.13E-15 | -2.63127 | 1 | 1 AC100756.1   | -- |
| ENSG00000238738 | 5.13E-15 | -2.63127 | 1 | 1 AC116345.1   | -- |
| ENSG00000238739 | 5.13E-15 | -2.63127 | 1 | 1 snoU13       | -- |
| ENSG00000238740 | 5.13E-15 | -2.63127 | 1 | 1 snoU13       | -- |
| ENSG00000238742 | 5.13E-15 | -2.63127 | 1 | 1 MIR2110      | -- |
| ENSG00000238744 | 5.13E-15 | -2.63127 | 1 | 1 snoU13       | -- |
| ENSG00000238745 | 5.13E-15 | -2.63127 | 1 | 1 snoU13       | -- |
| ENSG00000238746 | 5.13E-15 | -2.63127 | 1 | 1 snoU13       | -- |
| ENSG00000238747 | 5.13E-15 | -2.63127 | 1 | 1 snoU13       | -- |
| ENSG00000238748 | 5.13E-15 | -2.63127 | 1 | 1 snoU13       | -- |
| ENSG00000238749 | 5.13E-15 | -2.63127 | 1 | 1 Y_RNA        | -- |
| ENSG00000238750 | 5.13E-15 | -2.63127 | 1 | 1 RNU7-27P     | -- |
| ENSG00000238752 | 5.13E-15 | -2.63127 | 1 | 1 snoU13       | -- |
| ENSG00000238753 | 5.13E-15 | -2.63127 | 1 | 1 snoU13       | -- |
| ENSG00000238755 | 5.13E-15 | -2.63127 | 1 | 1 RP11-23D24.2 | -- |
| ENSG00000238756 | 5.13E-15 | -2.63127 | 1 | 1 snoU13       | -- |
| ENSG00000238758 | 5.13E-15 | -2.63127 | 1 | 1 AL512791.1   | -- |
| ENSG00000238759 | 5.13E-15 | -2.63127 | 1 | 1 RNU7-155P    | -- |
| ENSG00000238760 | 5.13E-15 | -2.63127 | 1 | 1 snoU13       | -- |
| ENSG00000238761 | 5.13E-15 | -2.63127 | 1 | 1 snoU13       | -- |
| ENSG00000238763 | 5.13E-15 | -2.63127 | 1 | 1 snoU13       | -- |
| ENSG00000238764 | 5.13E-15 | -2.63127 | 1 | 1 snoU13       | -- |
| ENSG00000238765 | 5.13E-15 | -2.63127 | 1 | 1 RNA5SP57     | -- |
| ENSG00000238766 | 5.13E-15 | -2.63127 | 1 | 1 AL513185.1   | -- |
| ENSG00000238767 | 5.13E-15 | -2.63127 | 1 | 1 snoU13       | -- |
| ENSG00000238768 | 5.13E-15 | -2.63127 | 1 | 1 snoU13       | -- |
| ENSG00000238769 | 5.13E-15 | -2.63127 | 1 | 1 snoU13       | -- |
| ENSG00000238770 | 5.13E-15 | -2.63127 | 1 | 1 snoU13       | -- |
| ENSG00000238771 | 5.13E-15 | -2.63127 | 1 | 1 snoU13       | -- |
| ENSG00000238772 | 5.13E-15 | -2.63127 | 1 | 1 snoU13       | -- |
| ENSG00000238773 | 5.13E-15 | -2.63127 | 1 | 1 AL137855.1   | -- |

|                 |          |          |   |                 |    |
|-----------------|----------|----------|---|-----------------|----|
| ENSG00000238774 | 5.13E-15 | -2.63127 | 1 | 1 AC009121.1    | -- |
| ENSG00000238775 | 5.13E-15 | -2.63127 | 1 | 1 snoU13        | -- |
| ENSG00000238776 | 5.13E-15 | -2.63127 | 1 | 1 snoU13        | -- |
| ENSG00000238778 | 5.13E-15 | -2.63127 | 1 | 1 RNU7-80P      | -- |
| ENSG00000238781 | 5.13E-15 | -2.63127 | 1 | 1 snoU13        | -- |
| ENSG00000238782 | 5.13E-15 | -2.63127 | 1 | 1 RNU7-9P       | -- |
| ENSG00000238783 | 5.13E-15 | -2.63127 | 1 | 1 Y_RNA         | -- |
| ENSG00000238785 | 5.13E-15 | -2.63127 | 1 | 1 RNU7-92P      | -- |
| ENSG00000238787 | 5.13E-15 | -2.63127 | 1 | 1 AC093577.1    | -- |
| ENSG00000238788 | 5.13E-15 | -2.63127 | 1 | 1 RNU7-182P     | -- |
| ENSG00000238789 | 5.13E-15 | -2.63127 | 1 | 1 RNU7-152P     | -- |
| ENSG00000238790 | 5.13E-15 | -2.63127 | 1 | 1 snoU13        | -- |
| ENSG00000238792 | 5.13E-15 | -2.63127 | 1 | 1 snoU13        | -- |
| ENSG00000238795 | 5.13E-15 | -2.63127 | 1 | 1 SCARNA12      | -- |
| ENSG00000238796 | 5.13E-15 | -2.63127 | 1 | 1 snoU13        | -- |
| ENSG00000238797 | 5.13E-15 | -2.63127 | 1 | 1 Y_RNA         | -- |
| ENSG00000238798 | 5.13E-15 | -2.63127 | 1 | 1 snoU13        | -- |
| ENSG00000238799 | 5.13E-15 | -2.63127 | 1 | 1 snoU13        | -- |
| ENSG00000238800 | 5.13E-15 | -2.63127 | 1 | 1 snoU13        | -- |
| ENSG00000238801 | 5.13E-15 | -2.63127 | 1 | 1 snoU13        | -- |
| ENSG00000238802 | 5.13E-15 | -2.63127 | 1 | 1 snoU13        | -- |
| ENSG00000238803 | 5.13E-15 | -2.63127 | 1 | 1 AL732479.1    | -- |
| ENSG00000238804 | 5.13E-15 | -2.63127 | 1 | 1 snoU13        | -- |
| ENSG00000238805 | 5.13E-15 | -2.63127 | 1 | 1 snoU13        | -- |
| ENSG00000238806 | 5.13E-15 | -2.63127 | 1 | 1 snoU13        | -- |
| ENSG00000238807 | 5.13E-15 | -2.63127 | 1 | 1 snoU13        | -- |
| ENSG00000238808 | 5.13E-15 | -2.63127 | 1 | 1 RNU7-102P     | -- |
| ENSG00000238809 | 5.13E-15 | -2.63127 | 1 | 1 snoU13        | -- |
| ENSG00000238811 | 5.13E-15 | -2.63127 | 1 | 1 snoU13        | -- |
| ENSG00000238812 | 5.13E-15 | -2.63127 | 1 | 1 RNU7-127P     | -- |
| ENSG00000238813 | 5.13E-15 | -2.63127 | 1 | 1 Y_RNA         | -- |
| ENSG00000238815 | 5.13E-15 | -2.63127 | 1 | 1 snoU13        | -- |
| ENSG00000238816 | 5.13E-15 | -2.63127 | 1 | 1 snoU13        | -- |
| ENSG00000238818 | 5.13E-15 | -2.63127 | 1 | 1 snoU13        | -- |
| ENSG00000238819 | 5.13E-15 | -2.63127 | 1 | 1 SNORD11       | -- |
| ENSG00000238822 | 5.13E-15 | -2.63127 | 1 | 1 snoU13        | -- |
| ENSG00000238823 | 5.13E-15 | -2.63127 | 1 | 1 AC215219.1    | -- |
| ENSG00000238825 | 5.13E-15 | -2.63127 | 1 | 1 RNU1-13P      | -- |
| ENSG00000238826 | 5.13E-15 | -2.63127 | 1 | 1 AL359253.1    | -- |
| ENSG00000238827 | 5.13E-15 | -2.63127 | 1 | 1 AC093611.1    | -- |
| ENSG00000238830 | 5.13E-15 | -2.63127 | 1 | 1 RNU7-46P      | -- |
| ENSG00000238833 | 5.13E-15 | -2.63127 | 1 | 1 RNU1-131P     | -- |
| ENSG00000238836 | 5.13E-15 | -2.63127 | 1 | 1 AC074129.1    | -- |
| ENSG00000238837 | 5.13E-15 | -2.63127 | 1 | 1 RP11-646E18.2 | -- |
| ENSG00000238838 | 5.13E-15 | -2.63127 | 1 | 1 snoU13        | -- |
| ENSG00000238840 | 5.13E-15 | -2.63127 | 1 | 1 U8            | -- |
| ENSG00000238841 | 5.13E-15 | -2.63127 | 1 | 1 snoU13        | -- |
| ENSG00000238842 | 5.13E-15 | -2.63127 | 1 | 1 RNU7-106P     | -- |
| ENSG00000238843 | 5.13E-15 | -2.63127 | 1 | 1 snoU13        | -- |
| ENSG00000238844 | 5.13E-15 | -2.63127 | 1 | 1 AC083875.1    | -- |
| ENSG00000238845 | 5.13E-15 | -2.63127 | 1 | 1 Y_RNA         | -- |
| ENSG00000238849 | 5.13E-15 | -2.63127 | 1 | 1 snoU13        | -- |
| ENSG00000238851 | 5.13E-15 | -2.63127 | 1 | 1 snoU13        | -- |
| ENSG00000238852 | 5.13E-15 | -2.63127 | 1 | 1 snoU13        | -- |
| ENSG00000238853 | 5.13E-15 | -2.63127 | 1 | 1 snoU13        | -- |
| ENSG00000238854 | 5.13E-15 | -2.63127 | 1 | 1 SNORD5        | -- |
| ENSG00000238855 | 5.13E-15 | -2.63127 | 1 | 1 snoU13        | -- |
| ENSG00000238856 | 5.13E-15 | -2.63127 | 1 | 1 snoU13        | -- |

|                 |          |          |   |              |    |
|-----------------|----------|----------|---|--------------|----|
| ENSG00000238858 | 5.13E-15 | -2.63127 | 1 | 1 snoU13     | -- |
| ENSG00000238859 | 5.13E-15 | -2.63127 | 1 | 1 snoU13     | -- |
| ENSG00000238860 | 5.13E-15 | -2.63127 | 1 | 1 snoU13     | -- |
| ENSG00000238861 | 5.13E-15 | -2.63127 | 1 | 1 AP003064.1 | -- |
| ENSG00000238862 | 5.13E-15 | -2.63127 | 1 | 1 SNORD19B   | -- |
| ENSG00000238863 | 5.13E-15 | -2.63127 | 1 | 1 snoU13     | -- |
| ENSG00000238864 | 5.13E-15 | -2.63127 | 1 | 1 snoU13     | -- |
| ENSG00000238865 | 5.13E-15 | -2.63127 | 1 | 1 snoU13     | -- |
| ENSG00000238867 | 5.13E-15 | -2.63127 | 1 | 1 AL136967.1 | -- |
| ENSG00000238869 | 5.13E-15 | -2.63127 | 1 | 1 snoU13     | -- |
| ENSG00000238870 | 5.13E-15 | -2.63127 | 1 | 1 AC009677.1 | -- |
| ENSG00000238871 | 5.13E-15 | -2.63127 | 1 | 1 snoU13     | -- |
| ENSG00000238872 | 5.13E-15 | -2.63127 | 1 | 1 snoU13     | -- |
| ENSG00000238874 | 5.13E-15 | -2.63127 | 1 | 1 snoU13     | -- |
| ENSG00000238875 | 5.13E-15 | -2.63127 | 1 | 1 RN7SKP210  | -- |
| ENSG00000238876 | 5.13E-15 | -2.63127 | 1 | 1 AL391261.1 | -- |
| ENSG00000238878 | 5.13E-15 | -2.63127 | 1 | 1 snoU13     | -- |
| ENSG00000238880 | 5.13E-15 | -2.63127 | 1 | 1 RNU7-59P   | -- |
| ENSG00000238882 | 5.13E-15 | -2.63127 | 1 | 1 RNU6-329P  | -- |
| ENSG00000238883 | 5.13E-15 | -2.63127 | 1 | 1 AC114491.1 | -- |
| ENSG00000238884 | 5.13E-15 | -2.63127 | 1 | 1 RNU7-85P   | -- |
| ENSG00000238885 | 5.13E-15 | -2.63127 | 1 | 1 snoU13     | -- |
| ENSG00000238887 | 5.13E-15 | -2.63127 | 1 | 1 snoU13     | -- |
| ENSG00000238888 | 5.13E-15 | -2.63127 | 1 | 1 snoU13     | -- |
| ENSG00000238889 | 5.13E-15 | -2.63127 | 1 | 1 snoU13     | -- |
| ENSG00000238890 | 5.13E-15 | -2.63127 | 1 | 1 AC078917.1 | -- |
| ENSG00000238891 | 5.13E-15 | -2.63127 | 1 | 1 snoU13     | -- |
| ENSG00000238892 | 5.13E-15 | -2.63127 | 1 | 1 snoU13     | -- |
| ENSG00000238893 | 5.13E-15 | -2.63127 | 1 | 1 snoU13     | -- |
| ENSG00000238895 | 5.13E-15 | -2.63127 | 1 | 1 snoU13     | -- |
| ENSG00000238896 | 5.13E-15 | -2.63127 | 1 | 1 snoU13     | -- |
| ENSG00000238898 | 5.13E-15 | -2.63127 | 1 | 1 RNU1-80P   | -- |
| ENSG00000238899 | 5.13E-15 | -2.63127 | 1 | 1 snoU13     | -- |
| ENSG00000238900 | 5.13E-15 | -2.63127 | 1 | 1 snoU13     | -- |
| ENSG00000238901 | 5.13E-15 | -2.63127 | 1 | 1 snoU13     | -- |
| ENSG00000238902 | 5.13E-15 | -2.63127 | 1 | 1 snoU13     | -- |
| ENSG00000238904 | 5.13E-15 | -2.63127 | 1 | 1 RNU7-34P   | -- |
| ENSG00000238905 | 5.13E-15 | -2.63127 | 1 | 1 snoU13     | -- |
| ENSG00000238906 | 5.13E-15 | -2.63127 | 1 | 1 snoU13     | -- |
| ENSG00000238907 | 5.13E-15 | -2.63127 | 1 | 1 snoU13     | -- |
| ENSG00000238908 | 5.13E-15 | -2.63127 | 1 | 1 RNA5SP484  | -- |
| ENSG00000238909 | 5.13E-15 | -2.63127 | 1 | 1 AC068643.1 | -- |
| ENSG00000238910 | 5.13E-15 | -2.63127 | 1 | 1 snoU13     | -- |
| ENSG00000238911 | 5.13E-15 | -2.63127 | 1 | 1 AC026357.1 | -- |
| ENSG00000238912 | 5.13E-15 | -2.63127 | 1 | 1 Y_RNA      | -- |
| ENSG00000238913 | 5.13E-15 | -2.63127 | 1 | 1 RNU7-196P  | -- |
| ENSG00000238914 | 5.13E-15 | -2.63127 | 1 | 1 snoU13     | -- |
| ENSG00000238917 | 5.13E-15 | -2.63127 | 1 | 1 SNORD10    | -- |
| ENSG00000238918 | 5.13E-15 | -2.63127 | 1 | 1 snoU13     | -- |
| ENSG00000238919 | 5.13E-15 | -2.63127 | 1 | 1 AL353763.1 | -- |
| ENSG00000238921 | 5.13E-15 | -2.63127 | 1 | 1 AL360178.1 | -- |
| ENSG00000238923 | 5.13E-15 | -2.63127 | 1 | 1 RNU7-1     | -- |
| ENSG00000238925 | 5.13E-15 | -2.63127 | 1 | 1 snoU13     | -- |
| ENSG00000238926 | 5.13E-15 | -2.63127 | 1 | 1 Y_RNA      | -- |
| ENSG00000238929 | 5.13E-15 | -2.63127 | 1 | 1 snoU13     | -- |
| ENSG00000238930 | 5.13E-15 | -2.63127 | 1 | 1 Y_RNA      | -- |
| ENSG00000238931 | 5.13E-15 | -2.63127 | 1 | 1 snoU13     | -- |
| ENSG00000238932 | 5.13E-15 | -2.63127 | 1 | 1 snoU13     | -- |

|                 |          |          |   |              |    |
|-----------------|----------|----------|---|--------------|----|
| ENSG00000238933 | 5.13E-15 | -2.63127 | 1 | 1 Y_RNA      | -- |
| ENSG00000238935 | 5.13E-15 | -2.63127 | 1 | 1 snoU13     | -- |
| ENSG00000238936 | 5.13E-15 | -2.63127 | 1 | 1 SNORD65    | -- |
| ENSG00000238938 | 5.13E-15 | -2.63127 | 1 | 1 snoU13     | -- |
| ENSG00000238939 | 5.13E-15 | -2.63127 | 1 | 1 snoU13     | -- |
| ENSG00000238940 | 5.13E-15 | -2.63127 | 1 | 1 snoU13     | -- |
| ENSG00000238941 | 5.13E-15 | -2.63127 | 1 | 1 RNU6-953P  | -- |
| ENSG00000238942 | 5.13E-15 | -2.63127 | 1 | 1 SNORD2     | -- |
| ENSG00000238943 | 5.13E-15 | -2.63127 | 1 | 1 Y_RNA      | -- |
| ENSG00000238945 | 5.13E-15 | -2.63127 | 1 | 1 snoU13     | -- |
| ENSG00000238946 | 5.13E-15 | -2.63127 | 1 | 1 snoU13     | -- |
| ENSG00000238947 | 5.13E-15 | -2.63127 | 1 | 1 snoU13     | -- |
| ENSG00000238949 | 5.13E-15 | -2.63127 | 1 | 1 RNU7-66P   | -- |
| ENSG00000238950 | 5.13E-15 | -2.63127 | 1 | 1 RNU7-173P  | -- |
| ENSG00000238951 | 5.13E-15 | -2.63127 | 1 | 1 snoU13     | -- |
| ENSG00000238952 | 5.13E-15 | -2.63127 | 1 | 1 AC099757.1 | -- |
| ENSG00000238954 | 5.13E-15 | -2.63127 | 1 | 1 snoU13     | -- |
| ENSG00000238957 | 5.13E-15 | -2.63127 | 1 | 1 AL512640.1 | -- |
| ENSG00000238958 | 5.13E-15 | -2.63127 | 1 | 1 AC098649.1 | -- |
| ENSG00000238959 | 5.13E-15 | -2.63127 | 1 | 1 RNU7-19P   | -- |
| ENSG00000238960 | 5.13E-15 | -2.63127 | 1 | 1 snoU13     | -- |
| ENSG00000238962 | 5.13E-15 | -2.63127 | 1 | 1 RNU7-176P  | -- |
| ENSG00000238963 | 5.13E-15 | -2.63127 | 1 | 1 U8         | -- |
| ENSG00000238964 | 5.13E-15 | -2.63127 | 1 | 1 RNU7-125P  | -- |
| ENSG00000238965 | 5.13E-15 | -2.63127 | 1 | 1 RNA5SP351  | -- |
| ENSG00000238966 | 5.13E-15 | -2.63127 | 1 | 1 SNORD112   | -- |
| ENSG00000238969 | 5.13E-15 | -2.63127 | 1 | 1 snoU13     | -- |
| ENSG00000238970 | 5.13E-15 | -2.63127 | 1 | 1 snoU13     | -- |
| ENSG00000238971 | 5.13E-15 | -2.63127 | 1 | 1 AC093766.1 | -- |
| ENSG00000238972 | 5.13E-15 | -2.63127 | 1 | 1 snoU13     | -- |
| ENSG00000238974 | 5.13E-15 | -2.63127 | 1 | 1 snoU13     | -- |
| ENSG00000238976 | 5.13E-15 | -2.63127 | 1 | 1 AC004016.1 | -- |
| ENSG00000238978 | 5.13E-15 | -2.63127 | 1 | 1 snoU13     | -- |
| ENSG00000238979 | 5.13E-15 | -2.63127 | 1 | 1 snoU13     | -- |
| ENSG00000238980 | 5.13E-15 | -2.63127 | 1 | 1 AL354806.1 | -- |
| ENSG00000238981 | 5.13E-15 | -2.63127 | 1 | 1 snoU13     | -- |
| ENSG00000238982 | 5.13E-15 | -2.63127 | 1 | 1 snoU13     | -- |
| ENSG00000238983 | 5.13E-15 | -2.63127 | 1 | 1 snoU13     | -- |
| ENSG00000238984 | 5.13E-15 | -2.63127 | 1 | 1 snoU13     | -- |
| ENSG00000238985 | 5.13E-15 | -2.63127 | 1 | 1 snoU13     | -- |
| ENSG00000238986 | 5.13E-15 | -2.63127 | 1 | 1 snoU13     | -- |
| ENSG00000238988 | 5.13E-15 | -2.63127 | 1 | 1 snoU13     | -- |
| ENSG00000238991 | 5.13E-15 | -2.63127 | 1 | 1 snoU13     | -- |
| ENSG00000238992 | 5.13E-15 | -2.63127 | 1 | 1 snoU13     | -- |
| ENSG00000238996 | 5.13E-15 | -2.63127 | 1 | 1 snoU13     | -- |
| ENSG00000238997 | 5.13E-15 | -2.63127 | 1 | 1 AC105052.1 | -- |
| ENSG00000238998 | 5.13E-15 | -2.63127 | 1 | 1 RNU7-187P  | -- |
| ENSG00000238999 | 5.13E-15 | -2.63127 | 1 | 1 snoU13     | -- |
| ENSG00000239000 | 5.13E-15 | -2.63127 | 1 | 1 snoU13     | -- |
| ENSG00000239001 | 5.13E-15 | -2.63127 | 1 | 1 RNU6-420P  | -- |
| ENSG00000239003 | 5.13E-15 | -2.63127 | 1 | 1 RNU7-88P   | -- |
| ENSG00000239004 | 5.13E-15 | -2.63127 | 1 | 1 RNU7-76P   | -- |
| ENSG00000239005 | 5.13E-15 | -2.63127 | 1 | 1 ACA64      | -- |
| ENSG00000239006 | 5.13E-15 | -2.63127 | 1 | 1 AC105941.1 | -- |
| ENSG00000239007 | 5.13E-15 | -2.63127 | 1 | 1 RNU7-95P   | -- |
| ENSG00000239008 | 5.13E-15 | -2.63127 | 1 | 1 ACA64      | -- |
| ENSG00000239010 | 5.13E-15 | -2.63127 | 1 | 1 RNU7-74P   | -- |
| ENSG00000239011 | 5.13E-15 | -2.63127 | 1 | 1 snoU13     | -- |

|                 |          |          |   |              |    |
|-----------------|----------|----------|---|--------------|----|
| ENSG00000239012 | 5.13E-15 | -2.63127 | 1 | 1 AL583842.1 | -- |
| ENSG00000239013 | 5.13E-15 | -2.63127 | 1 | 1 snoU13     | -- |
| ENSG00000239014 | 5.13E-15 | -2.63127 | 1 | 1 SNORD108   | -- |
| ENSG00000239015 | 5.13E-15 | -2.63127 | 1 | 1 snoU13     | -- |
| ENSG00000239017 | 5.13E-15 | -2.63127 | 1 | 1 snoU13     | -- |
| ENSG00000239018 | 5.13E-15 | -2.63127 | 1 | 1 snoU13     | -- |
| ENSG00000239020 | 5.13E-15 | -2.63127 | 1 | 1 snoU13     | -- |
| ENSG00000239021 | 5.13E-15 | -2.63127 | 1 | 1 RNA5SP246  | -- |
| ENSG00000239022 | 5.13E-15 | -2.63127 | 1 | 1 AC069082.1 | -- |
| ENSG00000239023 | 5.13E-15 | -2.63127 | 1 | 1 RNU1-98P   | -- |
| ENSG00000239024 | 5.13E-15 | -2.63127 | 1 | 1 snoU13     | -- |
| ENSG00000239025 | 5.13E-15 | -2.63127 | 1 | 1 snoU13     | -- |
| ENSG00000239026 | 5.13E-15 | -2.63127 | 1 | 1 snoU13     | -- |
| ENSG00000239027 | 5.13E-15 | -2.63127 | 1 | 1 snoU13     | -- |
| ENSG00000239028 | 5.13E-15 | -2.63127 | 1 | 1 AL359955.1 | -- |
| ENSG00000239030 | 5.13E-15 | -2.63127 | 1 | 1 RNU6-956P  | -- |
| ENSG00000239031 | 5.13E-15 | -2.63127 | 1 | 1 snoU13     | -- |
| ENSG00000239034 | 5.13E-15 | -2.63127 | 1 | 1 snoU13     | -- |
| ENSG00000239036 | 5.13E-15 | -2.63127 | 1 | 1 AC010209.1 | -- |
| ENSG00000239037 | 5.13E-15 | -2.63127 | 1 | 1 snoU13     | -- |
| ENSG00000239038 | 5.13E-15 | -2.63127 | 1 | 1 snoU13     | -- |
| ENSG00000239039 | 5.13E-15 | -2.63127 | 1 | 1 SNORD13    | -- |
| ENSG00000239041 | 5.13E-15 | -2.63127 | 1 | 1 snoU13     | -- |
| ENSG00000239044 | 5.13E-15 | -2.63127 | 1 | 1 snoU13     | -- |
| ENSG00000239045 | 5.13E-15 | -2.63127 | 1 | 1 snoU13     | -- |
| ENSG00000239046 | 5.13E-15 | -2.63127 | 1 | 1 snoU13     | -- |
| ENSG00000239048 | 5.13E-15 | -2.63127 | 1 | 1 AC008706.1 | -- |
| ENSG00000239049 | 5.13E-15 | -2.63127 | 1 | 1 snoU13     | -- |
| ENSG00000239050 | 5.13E-15 | -2.63127 | 1 | 1 AL354741.1 | -- |
| ENSG00000239053 | 5.13E-15 | -2.63127 | 1 | 1 RNU7-138P  | -- |
| ENSG00000239054 | 5.13E-15 | -2.63127 | 1 | 1 snoU13     | -- |
| ENSG00000239055 | 5.13E-15 | -2.63127 | 1 | 1 snoU13     | -- |
| ENSG00000239056 | 5.13E-15 | -2.63127 | 1 | 1 snoU13     | -- |
| ENSG00000239057 | 5.13E-15 | -2.63127 | 1 | 1 MIR500B    | -- |
| ENSG00000239058 | 5.13E-15 | -2.63127 | 1 | 1 snoU13     | -- |
| ENSG00000239061 | 5.13E-15 | -2.63127 | 1 | 1 snoU13     | -- |
| ENSG00000239064 | 5.13E-15 | -2.63127 | 1 | 1 snoU13     | -- |
| ENSG00000239065 | 5.13E-15 | -2.63127 | 1 | 1 snoU13     | -- |
| ENSG00000239066 | 5.13E-15 | -2.63127 | 1 | 1 snoU13     | -- |
| ENSG00000239067 | 5.13E-15 | -2.63127 | 1 | 1 snoU13     | -- |
| ENSG00000239068 | 5.13E-15 | -2.63127 | 1 | 1 snoU13     | -- |
| ENSG00000239069 | 5.13E-15 | -2.63127 | 1 | 1 Y_RNA      | -- |
| ENSG00000239070 | 5.13E-15 | -2.63127 | 1 | 1 MIR1299    | -- |
| ENSG00000239072 | 5.13E-15 | -2.63127 | 1 | 1 snoU13     | -- |
| ENSG00000239073 | 5.13E-15 | -2.63127 | 1 | 1 snoU13     | -- |
| ENSG00000239075 | 5.13E-15 | -2.63127 | 1 | 1 RNU6-274P  | -- |
| ENSG00000239077 | 5.13E-15 | -2.63127 | 1 | 1 snoU13     | -- |
| ENSG00000239078 | 5.13E-15 | -2.63127 | 1 | 1 RNU7-55P   | -- |
| ENSG00000239080 | 5.13E-15 | -2.63127 | 1 | 1 snoU13     | -- |
| ENSG00000239081 | 5.13E-15 | -2.63127 | 1 | 1 RNU7-24P   | -- |
| ENSG00000239082 | 5.13E-15 | -2.63127 | 1 | 1 RNU7-170P  | -- |
| ENSG00000239083 | 5.13E-15 | -2.63127 | 1 | 1 snoU13     | -- |
| ENSG00000239084 | 5.13E-15 | -2.63127 | 1 | 1 snoU13     | -- |
| ENSG00000239086 | 5.13E-15 | -2.63127 | 1 | 1 snoU13     | -- |
| ENSG00000239087 | 5.13E-15 | -2.63127 | 1 | 1 snoU13     | -- |
| ENSG00000239089 | 5.13E-15 | -2.63127 | 1 | 1 snoU13     | -- |
| ENSG00000239090 | 5.13E-15 | -2.63127 | 1 | 1 Y_RNA      | -- |
| ENSG00000239093 | 5.13E-15 | -2.63127 | 1 | 1 snoU13     | -- |



|                 |          |          |   |              |    |
|-----------------|----------|----------|---|--------------|----|
| ENSG00000239094 | 5.13E-15 | -2.63127 | 1 | 1 snoU13     | -- |
| ENSG00000239095 | 5.13E-15 | -2.63127 | 1 | 1 snoU13     | -- |
| ENSG00000239098 | 5.13E-15 | -2.63127 | 1 | 1 snoU13     | -- |
| ENSG00000239099 | 5.13E-15 | -2.63127 | 1 | 1 RNU7-23P   | -- |
| ENSG00000239100 | 5.13E-15 | -2.63127 | 1 | 1 snoU13     | -- |
| ENSG00000239101 | 5.13E-15 | -2.63127 | 1 | 1 AL162430.2 | -- |
| ENSG00000239102 | 5.13E-15 | -2.63127 | 1 | 1 RNU7-185P  | -- |
| ENSG00000239105 | 5.13E-15 | -2.63127 | 1 | 1 RNU7-73P   | -- |
| ENSG00000239106 | 5.13E-15 | -2.63127 | 1 | 1 Y_RNA      | -- |
| ENSG00000239107 | 5.13E-15 | -2.63127 | 1 | 1 CR392039.1 | -- |
| ENSG00000239108 | 5.13E-15 | -2.63127 | 1 | 1 RNU6-1132P | -- |
| ENSG00000239111 | 5.13E-15 | -2.63127 | 1 | 1 snoU13     | -- |
| ENSG00000239112 | 5.13E-15 | -2.63127 | 1 | 1 SNORD123   | -- |
| ENSG00000239114 | 5.13E-15 | -2.63127 | 1 | 1 snoU13     | -- |
| ENSG00000239115 | 5.13E-15 | -2.63127 | 1 | 1 RNU7-67P   | -- |
| ENSG00000239116 | 5.13E-15 | -2.63127 | 1 | 1 snoU13     | -- |
| ENSG00000239117 | 5.13E-15 | -2.63127 | 1 | 1 AL161669.1 | -- |
| ENSG00000239118 | 5.13E-15 | -2.63127 | 1 | 1 MIR1972-2  | -- |
| ENSG00000239119 | 5.13E-15 | -2.63127 | 1 | 1 RNU7-119P  | -- |
| ENSG00000239120 | 5.13E-15 | -2.63127 | 1 | 1 AL121761.1 | -- |
| ENSG00000239121 | 5.13E-15 | -2.63127 | 1 | 1 snoU13     | -- |
| ENSG00000239123 | 5.13E-15 | -2.63127 | 1 | 1 snoU13     | -- |
| ENSG00000239124 | 5.13E-15 | -2.63127 | 1 | 1 AC091565.1 | -- |
| ENSG00000239126 | 5.13E-15 | -2.63127 | 1 | 1 snoU13     | -- |
| ENSG00000239128 | 5.13E-15 | -2.63127 | 1 | 1 snoU13     | -- |
| ENSG00000239129 | 5.13E-15 | -2.63127 | 1 | 1 snoU13     | -- |
| ENSG00000239130 | 5.13E-15 | -2.63127 | 1 | 1 snoU13     | -- |
| ENSG00000239131 | 5.13E-15 | -2.63127 | 1 | 1 AC016706.1 | -- |
| ENSG00000239132 | 5.13E-15 | -2.63127 | 1 | 1 snoU13     | -- |
| ENSG00000239134 | 5.13E-15 | -2.63127 | 1 | 1 snoU13     | -- |
| ENSG00000239135 | 5.13E-15 | -2.63127 | 1 | 1 snoU13     | -- |
| ENSG00000239136 | 5.13E-15 | -2.63127 | 1 | 1 snoU13     | -- |
| ENSG00000239137 | 5.13E-15 | -2.63127 | 1 | 1 snoU13     | -- |
| ENSG00000239138 | 5.13E-15 | -2.63127 | 1 | 1 AC023818.1 | -- |
| ENSG00000239140 | 5.13E-15 | -2.63127 | 1 | 1 snoU13     | -- |
| ENSG00000239141 | 5.13E-15 | -2.63127 | 1 | 1 snoU13     | -- |
| ENSG00000239142 | 5.13E-15 | -2.63127 | 1 | 1 U8         | -- |
| ENSG00000239143 | 5.13E-15 | -2.63127 | 1 | 1 Y_RNA      | -- |
| ENSG00000239144 | 5.13E-15 | -2.63127 | 1 | 1 snoU13     | -- |
| ENSG00000239145 | 5.13E-15 | -2.63127 | 1 | 1 snoU13     | -- |
| ENSG00000239146 | 5.13E-15 | -2.63127 | 1 | 1 snoU13     | -- |
| ENSG00000239148 | 5.13E-15 | -2.63127 | 1 | 1 U8         | -- |
| ENSG00000239151 | 5.13E-15 | -2.63127 | 1 | 1 RNU7-195P  | -- |
| ENSG00000239152 | 5.13E-15 | -2.63127 | 1 | 1 RNA5SP310  | -- |
| ENSG00000239153 | 5.13E-15 | -2.63127 | 1 | 1 snoU13     | -- |
| ENSG00000239154 | 5.13E-15 | -2.63127 | 1 | 1 snoU13     | -- |
| ENSG00000239155 | 5.13E-15 | -2.63127 | 1 | 1 snoU13     | -- |
| ENSG00000239157 | 5.13E-15 | -2.63127 | 1 | 1 snoU13     | -- |
| ENSG00000239158 | 5.13E-15 | -2.63127 | 1 | 1 AP001178.1 | -- |
| ENSG00000239159 | 5.13E-15 | -2.63127 | 1 | 1 snoU13     | -- |
| ENSG00000239160 | 5.13E-15 | -2.63127 | 1 | 1 AL109947.1 | -- |
| ENSG00000239161 | 5.13E-15 | -2.63127 | 1 | 1 snoU13     | -- |
| ENSG00000239163 | 5.13E-15 | -2.63127 | 1 | 1 AC007056.1 | -- |
| ENSG00000239164 | 5.13E-15 | -2.63127 | 1 | 1 RNU7-184P  | -- |
| ENSG00000239166 | 5.13E-15 | -2.63127 | 1 | 1 snoU13     | -- |
| ENSG00000239167 | 5.13E-15 | -2.63127 | 1 | 1 AC090841.1 | -- |
| ENSG00000239168 | 5.13E-15 | -2.63127 | 1 | 1 RNU7-197P  | -- |
| ENSG00000239169 | 5.13E-15 | -2.63127 | 1 | 1 SNORD109B  | -- |

|                 |          |          |   |                 |        |
|-----------------|----------|----------|---|-----------------|--------|
| ENSG00000239170 | 5.13E-15 | -2.63127 | 1 | 1 snoU13        | --     |
| ENSG00000239171 | 5.13E-15 | -2.63127 | 1 | 1 snoU13        | --     |
| ENSG00000239172 | 5.13E-15 | -2.63127 | 1 | 1 snoU13        | --     |
| ENSG00000239173 | 5.13E-15 | -2.63127 | 1 | 1 snoU13        | --     |
| ENSG00000239175 | 5.13E-15 | -2.63127 | 1 | 1 RNU6-1218P    | --     |
| ENSG00000239176 | 5.13E-15 | -2.63127 | 1 | 1 snoU13        | --     |
| ENSG00000239178 | 5.13E-15 | -2.63127 | 1 | 1 RNU6-671P     | --     |
| ENSG00000239179 | 5.13E-15 | -2.63127 | 1 | 1 CR392039.2    | --     |
| ENSG00000239180 | 5.13E-15 | -2.63127 | 1 | 1 Y_RNA         | --     |
| ENSG00000239181 | 5.13E-15 | -2.63127 | 1 | 1 AC092048.1    | --     |
| ENSG00000239182 | 5.13E-15 | -2.63127 | 1 | 1 SNORA35       | --     |
| ENSG00000239184 | 5.13E-15 | -2.63127 | 1 | 1 RNA5SP269     | --     |
| ENSG00000239185 | 5.13E-15 | -2.63127 | 1 | 1 RNU7-190P     | --     |
| ENSG00000239186 | 5.13E-15 | -2.63127 | 1 | 1 snoU13        | --     |
| ENSG00000239188 | 5.13E-15 | -2.63127 | 1 | 1 snoU13        | --     |
| ENSG00000239189 | 5.13E-15 | -2.63127 | 1 | 1 RNU6-634P     | --     |
| ENSG00000239190 | 5.13E-15 | -2.63127 | 1 | 1 RNU6-717P     | --     |
| ENSG00000239191 | 5.13E-15 | -2.63127 | 1 | 1 snoU13        | --     |
| ENSG00000239192 | 5.13E-15 | -2.63127 | 1 | 1 AC011363.1    | --     |
| ENSG00000239193 | 5.13E-15 | -2.63127 | 1 | 1 snoU13        | --     |
| ENSG00000239194 | 5.13E-15 | -2.63127 | 1 | 1 RNU1-123P     | --     |
| ENSG00000239195 | 5.13E-15 | -2.63127 | 1 | 1 SNORD5        | --     |
| ENSG00000239197 | 5.13E-15 | -2.63127 | 1 | 1 snoU109       | --     |
| ENSG00000239199 | 5.13E-15 | -2.63127 | 1 | 1 RPL21P6       | K02889 |
| ENSG00000239200 | 5.13E-15 | -2.63127 | 1 | 1 RP11-536C10.1 | K02891 |
| ENSG00000239201 | 5.13E-15 | -2.63127 | 1 | 1 RPL21P106     | K02889 |
| ENSG00000239202 | 5.13E-15 | -2.63127 | 1 | 1 RN7SL499P     | --     |
| ENSG00000239203 | 5.13E-15 | -2.63127 | 1 | 1 AC093484.4    | --     |
| ENSG00000239205 | 5.13E-15 | -2.63127 | 1 | 1 RP11-747D18.1 | --     |
| ENSG00000239207 | 5.13E-15 | -2.63127 | 1 | 1 GAPDHP39      | K00134 |
| ENSG00000239210 | 5.13E-15 | -2.63127 | 1 | 1 RPS26P55      | K02976 |
| ENSG00000239211 | 5.13E-15 | -2.63127 | 1 | 1 RN7SL563P     | --     |
| ENSG00000239212 | 5.13E-15 | -2.63127 | 1 | 1 RPL6P7        | K02934 |
| ENSG00000239215 | 5.13E-15 | -2.63127 | 1 | 1 RPL27P12      | K02901 |
| ENSG00000239216 | 5.13E-15 | -2.63127 | 1 | 1 RP4-712E4.2   | --     |
| ENSG00000239221 | 5.13E-15 | -2.63127 | 1 | 1 RN7SL442P     | --     |
| ENSG00000239223 | 5.13E-15 | -2.63127 | 1 | 1 RPL34P31      | K02915 |
| ENSG00000239224 | 5.13E-15 | -2.63127 | 1 | 1 RN7SL546P     | --     |
| ENSG00000239225 | 5.13E-15 | -2.63127 | 1 | 1 TTTY23        | --     |
| ENSG00000239226 | 5.13E-15 | -2.63127 | 1 | 1 MRPS17P3      | K02961 |
| ENSG00000239227 | 5.13E-15 | -2.63127 | 1 | 1 RP11-12K11.1  | K03875 |
| ENSG00000239228 | 5.13E-15 | -2.63127 | 1 | 1 RN7SL578P     | --     |
| ENSG00000239230 | 5.13E-15 | -2.63127 | 1 | 1 RN7SL95P      | --     |
| ENSG00000239238 | 5.13E-15 | -2.63127 | 1 | 1 MEMO1P3       | K06990 |
| ENSG00000239249 | 5.13E-15 | -2.63127 | 1 | 1 RN7SL757P     | --     |
| ENSG00000239250 | 5.13E-15 | -2.63127 | 1 | 1 RN7SL271P     | --     |
| ENSG00000239253 | 5.13E-15 | -2.63127 | 1 | 1 RPS4XP23      | K02987 |
| ENSG00000239255 | 5.13E-15 | -2.63127 | 1 | 1 RP11-145M9.2  | --     |
| ENSG00000239256 | 5.13E-15 | -2.63127 | 1 | 1 RPL35AP35     | K02917 |
| ENSG00000239257 | 5.13E-15 | -2.63127 | 1 | 1 RPL23AP1      | K02893 |
| ENSG00000239261 | 5.13E-15 | -2.63127 | 1 | 1 RPL31P41      | K02910 |
| ENSG00000239263 | 5.13E-15 | -2.63127 | 1 | 1 RBM43P1       | --     |
| ENSG00000239265 | 5.13E-15 | -2.63127 | 1 | 1 CLRN1-AS1     | --     |
| ENSG00000239268 | 5.13E-15 | -2.63127 | 1 | 1 RP11-384F7.2  | --     |
| ENSG00000239269 | 5.13E-15 | -2.63127 | 1 | 1 RPSAP4        | K02998 |
| ENSG00000239275 | 5.13E-15 | -2.63127 | 1 | 1 RP4-675G8.2   | --     |
| ENSG00000239279 | 5.13E-15 | -2.63127 | 1 | 1 RN7SL184P     | --     |
| ENSG00000239281 | 5.13E-15 | -2.63127 | 1 | 1 RPS29P2       | K02980 |

|                 |          |          |   |                 |        |
|-----------------|----------|----------|---|-----------------|--------|
| ENSG00000239288 | 5.13E-15 | -2.63127 | 1 | 1 RP11-59E19.3  | K11723 |
| ENSG00000239291 | 5.13E-15 | -2.63127 | 1 | 1 RP5-867C24.1  | K02981 |
| ENSG00000239293 | 5.13E-15 | -2.63127 | 1 | 1 OR9P1P        | K04257 |
| ENSG00000239304 | 5.13E-15 | -2.63127 | 1 | 1 DNM1P48       | K01528 |
| ENSG00000239311 | 5.13E-15 | -2.63127 | 1 | 1 RP11-615J4.3  | -      |
| ENSG00000239314 | 5.13E-15 | -2.63127 | 1 | 1 MORC1-AS1     | -      |
| ENSG00000239315 | 5.13E-15 | -2.63127 | 1 | 1 RPL19P13      | K02885 |
| ENSG00000239316 | 5.13E-15 | -2.63127 | 1 | 1 RN7SL11P      | -      |
| ENSG00000239317 | 5.13E-15 | -2.63127 | 1 | 1 RP11-449H3.2  | K02917 |
| ENSG00000239319 | 5.13E-15 | -2.63127 | 1 | 1 RN7SL854P     | -      |
| ENSG00000239320 | 5.13E-15 | -2.63127 | 1 | 1 RPS29P26      | -      |
| ENSG00000239322 | 5.13E-15 | -2.63127 | 1 | 1 AC007040.7    | -      |
| ENSG00000239323 | 5.13E-15 | -2.63127 | 1 | 1 CTD-2213F21.1 | K02940 |
| ENSG00000239327 | 5.13E-15 | -2.63127 | 1 | 1 RP11-14J7.1   | K02976 |
| ENSG00000239333 | 5.13E-15 | -2.63127 | 1 | 1 RN7SL658P     | -      |
| ENSG00000239334 | 5.13E-15 | -2.63127 | 1 | 1 GSTTP2        | K00799 |
| ENSG00000239344 | 5.13E-15 | -2.63127 | 1 | 1 RP11-771F20.1 | K02991 |
| ENSG00000239345 | 5.13E-15 | -2.63127 | 1 | 1 HNRNPA1P26    | K12741 |
| ENSG00000239350 | 5.13E-15 | -2.63127 | 1 | 1 RP11-398A8.2  | -      |
| ENSG00000239354 | 5.13E-15 | -2.63127 | 1 | 1 RPS17P15      | -      |
| ENSG00000239356 | 5.13E-15 | -2.63127 | 1 | 1 RN7SL309P     | -      |
| ENSG00000239365 | 5.13E-15 | -2.63127 | 1 | 1 RPS26P49      | -      |
| ENSG00000239367 | 5.13E-15 | -2.63127 | 1 | 1 RN7SL477P     | -      |
| ENSG00000239373 | 5.13E-15 | -2.63127 | 1 | 1 RN7SL425P     | -      |
| ENSG00000239374 | 5.13E-15 | -2.63127 | 1 | 1 RP11-407P2.1  | K02889 |
| ENSG00000239381 | 5.13E-15 | -2.63127 | 1 | 1 RP11-4B14.3   | -      |
| ENSG00000239383 | 5.13E-15 | -2.63127 | 1 | 1 RP11-413E6.2  | K04257 |
| ENSG00000239389 | 5.13E-15 | -2.63127 | 1 | 1 PCDHA13       | K16493 |
| ENSG00000239390 | 5.13E-15 | -2.63127 | 1 | 1 RN7SL87P      | -      |
| ENSG00000239392 | 5.13E-15 | -2.63127 | 1 | 1 RP11-537H15.4 | K00088 |
| ENSG00000239395 | 5.13E-15 | -2.63127 | 1 | 1 RP11-634B7.5  | -      |
| ENSG00000239396 | 5.13E-15 | -2.63127 | 1 | 1 RN7SL414P     | -      |
| ENSG00000239397 | 5.13E-15 | -2.63127 | 1 | 1 RP11-101K23.1 | -      |
| ENSG00000239398 | 5.13E-15 | -2.63127 | 1 | 1 RN7SL342P     | -      |
| ENSG00000239402 | 5.13E-15 | -2.63127 | 1 | 1 CYP4F62P      | K13356 |
| ENSG00000239408 | 5.13E-15 | -2.63127 | 1 | 1 RP11-278L15.4 | -      |
| ENSG00000239412 | 5.13E-15 | -2.63127 | 1 | 1 RPL21P71      | K02889 |
| ENSG00000239413 | 5.13E-15 | -2.63127 | 1 | 1 RPS27P23      | K02978 |
| ENSG00000239419 | 5.13E-15 | -2.63127 | 1 | 1 RN7SL535P     | -      |
| ENSG00000239426 | 5.13E-15 | -2.63127 | 1 | 1 OR8F1P        | K04257 |
| ENSG00000239428 | 5.13E-15 | -2.63127 | 1 | 1 GM2AP2        | K12383 |
| ENSG00000239429 | 5.13E-15 | -2.63127 | 1 | 1 RP11-45D17.1  | K09026 |
| ENSG00000239432 | 5.13E-15 | -2.63127 | 1 | 1 GS1-388B5.8   | K04257 |
| ENSG00000239435 | 5.13E-15 | -2.63127 | 1 | 1 KCNMB3P1      | K04939 |
| ENSG00000239437 | 5.13E-15 | -2.63127 | 1 | 1 RN7SL752P     | -      |
| ENSG00000239438 | 5.13E-15 | -2.63127 | 1 | 1 RP11-332E19.1 | -      |
| ENSG00000239439 | 5.13E-15 | -2.63127 | 1 | 1 RFKP2         | K00861 |
| ENSG00000239440 | 5.13E-15 | -2.63127 | 1 | 1 RP11-260O18.1 | -      |
| ENSG00000239443 | 5.13E-15 | -2.63127 | 1 | 1 PABPC1P10     | K13126 |
| ENSG00000239445 | 5.13E-15 | -2.63127 | 1 | 1 ST3GAL6-AS1   | -      |
| ENSG00000239446 | 5.13E-15 | -2.63127 | 1 | 1 RP1-76B20.12  | -      |
| ENSG00000239453 | 5.13E-15 | -2.63127 | 1 | 1 SIDT1-AS1     | -      |
| ENSG00000239454 | 5.13E-15 | -2.63127 | 1 | 1 RP11-508O18.1 | -      |
| ENSG00000239455 | 5.13E-15 | -2.63127 | 1 | 1 RP11-561O4.1  | K07293 |
| ENSG00000239462 | 5.13E-15 | -2.63127 | 1 | 1 CTD-2021J15.1 | -      |
| ENSG00000239464 | 5.13E-15 | -2.63127 | 1 | 1 RN7SL691P     | -      |
| ENSG00000239465 | 5.13E-15 | -2.63127 | 1 | 1 RP11-330L19.2 | K02889 |
| ENSG00000239466 | 5.13E-15 | -2.63127 | 1 | 1 RN7SL552P     | -      |

|                 |          |          |   |                 |        |
|-----------------|----------|----------|---|-----------------|--------|
| ENSG00000239467 | 5.13E-15 | -2.63127 | 1 | 1 AC007405.6    | -      |
| ENSG00000239468 | 5.13E-15 | -2.63127 | 1 | 1 RN7SL569P     | -      |
| ENSG00000239471 | 5.13E-15 | -2.63127 | 1 | 1 RN7SL584P     | -      |
| ENSG00000239472 | 5.13E-15 | -2.63127 | 1 | 1 RN7SL221P     | -      |
| ENSG00000239473 | 5.13E-15 | -2.63127 | 1 | 1 RPL7P38       | K02937 |
| ENSG00000239475 | 5.13E-15 | -2.63127 | 1 | 1 HYDIN2        | -      |
| ENSG00000239480 | 5.13E-15 | -2.63127 | 1 | 1 RP11-514P8.2  | -      |
| ENSG00000239481 | 5.13E-15 | -2.63127 | 1 | 1 RPS3AP41      | K02984 |
| ENSG00000239482 | 5.13E-15 | -2.63127 | 1 | 1 RP11-90K6.1   | -      |
| ENSG00000239483 | 5.13E-15 | -2.63127 | 1 | 1 RPS15AP16     | K02957 |
| ENSG00000239486 | 5.13E-15 | -2.63127 | 1 | 1 RP11-163E9.1  | K13055 |
| ENSG00000239490 | 5.13E-15 | -2.63127 | 1 | 1 RPS4XP18      | K02987 |
| ENSG00000239492 | 5.13E-15 | -2.63127 | 1 | 1 FAM25HP       | -      |
| ENSG00000239498 | 5.13E-15 | -2.63127 | 1 | 1 AC114765.1    | -      |
| ENSG00000239500 | 5.13E-15 | -2.63127 | 1 | 1 RP1-169K13.3  | K07375 |
| ENSG00000239503 | 5.13E-15 | -2.63127 | 1 | 1 MARK2P8       | -      |
| ENSG00000239504 | 5.13E-15 | -2.63127 | 1 | 1 RN7SL583P     | -      |
| ENSG00000239508 | 5.13E-15 | -2.63127 | 1 | 1 PLCH1-AS1     | -      |
| ENSG00000239510 | 5.13E-15 | -2.63127 | 1 | 1 RPL9P5        | K02940 |
| ENSG00000239511 | 5.13E-15 | -2.63127 | 1 | 1 POM121L7      | -      |
| ENSG00000239513 | 5.13E-15 | -2.63127 | 1 | 1 RP11-2A4.3    | -      |
| ENSG00000239516 | 5.13E-15 | -2.63127 | 1 | 1 FLYWCH1P1     | -      |
| ENSG00000239517 | 5.13E-15 | -2.63127 | 1 | 1 CTD-2503O16.1 | K02924 |
| ENSG00000239519 | 5.13E-15 | -2.63127 | 1 | 1 CADM2-AS1     | -      |
| ENSG00000239520 | 5.13E-15 | -2.63127 | 1 | 1 RPL17P42      | K02880 |
| ENSG00000239525 | 5.13E-15 | -2.63127 | 1 | 1 RPL30P5       | K06013 |
| ENSG00000239527 | 5.13E-15 | -2.63127 | 1 | 1 RPS23P7       | K02973 |
| ENSG00000239528 | 5.13E-15 | -2.63127 | 1 | 1 CTB-118N6.1   | K02955 |
| ENSG00000239532 | 5.13E-15 | -2.63127 | 1 | 1 RP11-9D8.1    | K02889 |
| ENSG00000239533 | 5.13E-15 | -2.63127 | 1 | 1 GOLGA2P2Y     | -      |
| ENSG00000239539 | 5.13E-15 | -2.63127 | 1 | 1 HMGN1P20      | K11299 |
| ENSG00000239542 | 5.13E-15 | -2.63127 | 1 | 1 RN7SL399P     | -      |
| ENSG00000239544 | 5.13E-15 | -2.63127 | 1 | 1 RP11-109N23.1 | -      |
| ENSG00000239545 | 5.13E-15 | -2.63127 | 1 | 1 RN7SL822P     | -      |
| ENSG00000239547 | 5.13E-15 | -2.63127 | 1 | 1 RN7SL843P     | -      |
| ENSG00000239552 | 5.13E-15 | -2.63127 | 1 | 1 HOXB-AS2      | -      |
| ENSG00000239555 | 5.13E-15 | -2.63127 | 1 | 1 RN7SL841P     | -      |
| ENSG00000239560 | 5.13E-15 | -2.63127 | 1 | 1 RN7SL479P     | -      |
| ENSG00000239568 | 5.13E-15 | -2.63127 | 1 | 1 RP11-654C22.1 | -      |
| ENSG00000239570 | 5.13E-15 | -2.63127 | 1 | 1 SETP11        | K11290 |
| ENSG00000239571 | 5.13E-15 | -2.63127 | 1 | 1 IGKV2D-30     | -      |
| ENSG00000239572 | 5.13E-15 | -2.63127 | 1 | 1 RP11-451B8.1  | -      |
| ENSG00000239576 | 5.13E-15 | -2.63127 | 1 | 1 COX6CP14      | K02268 |
| ENSG00000239577 | 5.13E-15 | -2.63127 | 1 | 1 RN7SL388P     | -      |
| ENSG00000239579 | 5.13E-15 | -2.63127 | 1 | 1 RN7SL325P     | -      |
| ENSG00000239580 | 5.13E-15 | -2.63127 | 1 | 1 RN7SL675P     | -      |
| ENSG00000239586 | 5.13E-15 | -2.63127 | 1 | 1 MTND1P16      | K03878 |
| ENSG00000239587 | 5.13E-15 | -2.63127 | 1 | 1 AC018730.4    | -      |
| ENSG00000239589 | 5.13E-15 | -2.63127 | 1 | 1 LINC00879     | -      |
| ENSG00000239590 | 5.13E-15 | -2.63127 | 1 | 1 OR1J4         | K04257 |
| ENSG00000239594 | 5.13E-15 | -2.63127 | 1 | 1 MIR18B        | -      |
| ENSG00000239595 | 5.13E-15 | -2.63127 | 1 | 1 RN7SL79P      | -      |
| ENSG00000239600 | 5.13E-15 | -2.63127 | 1 | 1 AP000797.2    | K02932 |
| ENSG00000239605 | 5.13E-15 | -2.63127 | 1 | 1 C2orf61       | -      |
| ENSG00000239607 | 5.13E-15 | -2.63127 | 1 | 1 RN7SL573P     | -      |
| ENSG00000239610 | 5.13E-15 | -2.63127 | 1 | 1 RN7SL13P      | -      |
| ENSG00000239615 | 5.13E-15 | -2.63127 | 1 | 1 CTD-2410N18.1 | K02953 |
| ENSG00000239620 | 5.13E-15 | -2.63127 | 1 | 1 RP11-88I21.1  | -      |

|                 |          |          |   |                 |        |
|-----------------|----------|----------|---|-----------------|--------|
| ENSG00000239622 | 5.13E-15 | -2.63127 | 1 | 1 CTA-242H14.1  | K02927 |
| ENSG00000239625 | 5.13E-15 | -2.63127 | 1 | 1 RN7SL241P     | -      |
| ENSG00000239626 | 5.13E-15 | -2.63127 | 1 | 1 RPSAP41       | K02998 |
| ENSG00000239628 | 5.13E-15 | -2.63127 | 1 | 1 RP11-543D10.2 | -      |
| ENSG00000239632 | 5.13E-15 | -2.63127 | 1 | 1 RP11-52L11.9  | -      |
| ENSG00000239640 | 5.13E-15 | -2.63127 | 1 | 1 RN7SL62P      | -      |
| ENSG00000239641 | 5.13E-15 | -2.63127 | 1 | 1 PLS1-AS1      | -      |
| ENSG00000239642 | 5.13E-15 | -2.63127 | 1 | 1 AC034228.7    | -      |
| ENSG00000239648 | 5.13E-15 | -2.63127 | 1 | 1 MTND1P3       | K03878 |
| ENSG00000239649 | 5.13E-15 | -2.63127 | 1 | 1 MYADML        | -      |
| ENSG00000239650 | 5.13E-15 | -2.63127 | 1 | 1 GUSBP4        | K01195 |
| ENSG00000239659 | 5.13E-15 | -2.63127 | 1 | 1 RPL9P31       | K02940 |
| ENSG00000239661 | 5.13E-15 | -2.63127 | 1 | 1 RP11-78O22.1  | -      |
| ENSG00000239664 | 5.13E-15 | -2.63127 | 1 | 1 RP5-857K21.3  | -      |
| ENSG00000239671 | 5.13E-15 | -2.63127 | 1 | 1 CTD-3193K9.1  | K02915 |
| ENSG00000239674 | 5.13E-15 | -2.63127 | 1 | 1 RP1-127L4.7   | -      |
| ENSG00000239677 | 5.13E-15 | -2.63127 | 1 | 1 PDZRN3-AS1    | -      |
| ENSG00000239679 | 5.13E-15 | -2.63127 | 1 | 1 RN7SL193P     | -      |
| ENSG00000239683 | 5.13E-15 | -2.63127 | 1 | 1 RP11-322E11.1 | K02936 |
| ENSG00000239684 | 5.13E-15 | -2.63127 | 1 | 1 PTGER4P3      | K04261 |
| ENSG00000239686 | 5.13E-15 | -2.63127 | 1 | 1 RP11-665C16.1 | K02915 |
| ENSG00000239689 | 5.13E-15 | -2.63127 | 1 | 1 RPL17P46      | K02880 |
| ENSG00000239690 | 5.13E-15 | -2.63127 | 1 | 1 RN7SL668P     | -      |
| ENSG00000239694 | 5.13E-15 | -2.63127 | 1 | 1 CTD-2156G10.1 | K02998 |
| ENSG00000239696 | 5.13E-15 | -2.63127 | 1 | 1 RP11-397J20.1 | K09229 |
| ENSG00000239697 | 5.13E-15 | -2.63127 | 1 | 1 TNFSF12       | K05474 |
| ENSG00000239699 | 5.13E-15 | -2.63127 | 1 | 1 HNRNPA3P8     | K12741 |
| ENSG00000239701 | 5.13E-15 | -2.63127 | 1 | 1 RP3-461F17.1  | -      |
| ENSG00000239702 | 5.13E-15 | -2.63127 | 1 | 1 RN7SL507P     | -      |
| ENSG00000239703 | 5.13E-15 | -2.63127 | 1 | 1 RN7SL568P     | -      |
| ENSG00000239705 | 5.13E-15 | -2.63127 | 1 | 1 RP11-65N13.8  | -      |
| ENSG00000239706 | 5.13E-15 | -2.63127 | 1 | 1 RP11-6F2.3    | K02832 |
| ENSG00000239708 | 5.13E-15 | -2.63127 | 1 | 1 RN7SL782P     | -      |
| ENSG00000239710 | 5.13E-15 | -2.63127 | 1 | 1 RN7SL692P     | -      |
| ENSG00000239713 | 5.13E-15 | -2.63127 | 1 | 1 APOBEC3G      | K18750 |
| ENSG00000239715 | 5.13E-15 | -2.63127 | 1 | 1 AC093627.11   | -      |
| ENSG00000239716 | 5.13E-15 | -2.63127 | 1 | 1 RP11-290K4.1  | -      |
| ENSG00000239718 | 5.13E-15 | -2.63127 | 1 | 1 HLTf-AS1      | -      |
| ENSG00000239719 | 5.13E-15 | -2.63127 | 1 | 1 RP4-800G7.1   | K02929 |
| ENSG00000239722 | 5.13E-15 | -2.63127 | 1 | 1 IMP3P2        | K14560 |
| ENSG00000239726 | 5.13E-15 | -2.63127 | 1 | 1 RN7SL688P     | -      |
| ENSG00000239732 | 5.13E-15 | -2.63127 | 1 | 1 TLR9          | K10161 |
| ENSG00000239736 | 5.13E-15 | -2.63127 | 1 | 1 CEACAMP3      | K09539 |
| ENSG00000239739 | 5.13E-15 | -2.63127 | 1 | 1 RP11-373E16.4 | -      |
| ENSG00000239742 | 5.13E-15 | -2.63127 | 1 | 1 RN7SL672P     | -      |
| ENSG00000239744 | 5.13E-15 | -2.63127 | 1 | 1 RN7SL63P      | -      |
| ENSG00000239745 | 5.13E-15 | -2.63127 | 1 | 1 RN7SL790P     | -      |
| ENSG00000239748 | 5.13E-15 | -2.63127 | 1 | 1 RN7SL795P     | -      |
| ENSG00000239767 | 5.13E-15 | -2.63127 | 1 | 1 RP11-789F5.1  | -      |
| ENSG00000239775 | 5.13E-15 | -2.63127 | 1 | 1 AC017116.11   | -      |
| ENSG00000239776 | 5.13E-15 | -2.63127 | 1 | 1 AC079949.1    | -      |
| ENSG00000239780 | 5.13E-15 | -2.63127 | 1 | 1 RPLP0P11      | K02941 |
| ENSG00000239783 | 5.13E-15 | -2.63127 | 1 | 1 RP5-1050K3.3  | K17620 |
| ENSG00000239792 | 5.13E-15 | -2.63127 | 1 | 1 RP11-255N24.1 | -      |
| ENSG00000239793 | 5.13E-15 | -2.63127 | 1 | 1 RP11-109G23.1 | K02971 |
| ENSG00000239794 | 5.13E-15 | -2.63127 | 1 | 1 RN7SL653P     | -      |
| ENSG00000239797 | 5.13E-15 | -2.63127 | 1 | 1 RPL21P39      | K02889 |
| ENSG00000239799 | 5.13E-15 | -2.63127 | 1 | 1 ITIH4-AS1     | -      |

|                 |          |          |   |                 |        |
|-----------------|----------|----------|---|-----------------|--------|
| ENSG00000239801 | 5.13E-15 | -2.63127 | 1 | 1 RP11-755B10.2 | -      |
| ENSG00000239804 | 5.13E-15 | -2.63127 | 1 | 1 RP11-379B18.1 | -      |
| ENSG00000239805 | 5.13E-15 | -2.63127 | 1 | 1 RP11-252O18.2 | K11877 |
| ENSG00000239808 | 5.13E-15 | -2.63127 | 1 | 1 RN7SL255P     | -      |
| ENSG00000239809 | 5.13E-15 | -2.63127 | 1 | 1 RP11-51L5.2   | K02943 |
| ENSG00000239810 | 5.13E-15 | -2.63127 | 1 | 1 WI2-3308P17.2 | -      |
| ENSG00000239819 | 5.13E-15 | -2.63127 | 1 | 1 IGKV1D-8      | -      |
| ENSG00000239820 | 5.13E-15 | -2.63127 | 1 | 1 RN7SL213P     | -      |
| ENSG00000239822 | 5.13E-15 | -2.63127 | 1 | 1 RN7SL754P     | -      |
| ENSG00000239825 | 5.13E-15 | -2.63127 | 1 | 1 RN7SL549P     | -      |
| ENSG00000239827 | 5.13E-15 | -2.63127 | 1 | 1 SUGT1P3       | K09228 |
| ENSG00000239829 | 5.13E-15 | -2.63127 | 1 | 1 KRT8P25       | K07605 |
| ENSG00000239831 | 5.13E-15 | -2.63127 | 1 | 1 RNF7P1        | K10611 |
| ENSG00000239835 | 5.13E-15 | -2.63127 | 1 | 1 RP11-767L7.1  | K09650 |
| ENSG00000239839 | 5.13E-15 | -2.63127 | 1 | 1 DEFA3         | K05230 |
| ENSG00000239840 | 5.13E-15 | -2.63127 | 1 | 1 RPL23AP72     | K02893 |
| ENSG00000239855 | 5.13E-15 | -2.63127 | 1 | 1 IGKV1-6       | -      |
| ENSG00000239856 | 5.13E-15 | -2.63127 | 1 | 1 RN7SL225P     | -      |
| ENSG00000239859 | 5.13E-15 | -2.63127 | 1 | 1 RN7SL281P     | -      |
| ENSG00000239861 | 5.13E-15 | -2.63127 | 1 | 1 RP11-690D19.1 | K02889 |
| ENSG00000239862 | 5.13E-15 | -2.63127 | 1 | 1 IGKV1-37      | -      |
| ENSG00000239870 | 5.13E-15 | -2.63127 | 1 | 1 RP11-83M16.1  | K02889 |
| ENSG00000239872 | 5.13E-15 | -2.63127 | 1 | 1 RPL35AP19     | K02917 |
| ENSG00000239873 | 5.13E-15 | -2.63127 | 1 | 1 GAPDHP27      | K00134 |
| ENSG00000239877 | 5.13E-15 | -2.63127 | 1 | 1 IGSF11-AS1    | -      |
| ENSG00000239880 | 5.13E-15 | -2.63127 | 1 | 1 RP11-420J11.1 | K08773 |
| ENSG00000239881 | 5.13E-15 | -2.63127 | 1 | 1 RPS27P25      | K02978 |
| ENSG00000239886 | 5.13E-15 | -2.63127 | 1 | 1 KRTAP9-2      | -      |
| ENSG00000239888 | 5.13E-15 | -2.63127 | 1 | 1 RN7SL792P     | -      |
| ENSG00000239891 | 5.13E-15 | -2.63127 | 1 | 1 RN7SL341P     | -      |
| ENSG00000239893 | 5.13E-15 | -2.63127 | 1 | 1 ZNF736P9Y     | K09228 |
| ENSG00000239898 | 5.13E-15 | -2.63127 | 1 | 1 RN7SL796P     | -      |
| ENSG00000239903 | 5.13E-15 | -2.63127 | 1 | 1 RP11-353N4.2  | -      |
| ENSG00000239906 | 5.13E-15 | -2.63127 | 1 | 1 RP11-34P13.14 | -      |
| ENSG00000239910 | 5.13E-15 | -2.63127 | 1 | 1 RN7SL530P     | -      |
| ENSG00000239917 | 5.13E-15 | -2.63127 | 1 | 1 RPS10P16      | K02947 |
| ENSG00000239920 | 5.13E-15 | -2.63127 | 1 | 1 AC015691.13   | -      |
| ENSG00000239921 | 5.13E-15 | -2.63127 | 1 | 1 RP11-59J16.1  | -      |
| ENSG00000239922 | 5.13E-15 | -2.63127 | 1 | 1 RP11-71N10.1  | -      |
| ENSG00000239923 | 5.13E-15 | -2.63127 | 1 | 1 RN7SL864P     | -      |
| ENSG00000239924 | 5.13E-15 | -2.63127 | 1 | 1 RPL29P22      | K08206 |
| ENSG00000239926 | 5.13E-15 | -2.63127 | 1 | 1 PRDX3P4       | K03386 |
| ENSG00000239930 | 5.13E-15 | -2.63127 | 1 | 1 AP001625.4    | -      |
| ENSG00000239932 | 5.13E-15 | -2.63127 | 1 | 1 RN7SL606P     | -      |
| ENSG00000239939 | 5.13E-15 | -2.63127 | 1 | 1 RPSAP34       | -      |
| ENSG00000239941 | 5.13E-15 | -2.63127 | 1 | 1 RP11-246A10.1 | -      |
| ENSG00000239942 | 5.13E-15 | -2.63127 | 1 | 1 RN7SL394P     | -      |
| ENSG00000239944 | 5.13E-15 | -2.63127 | 1 | 1 TRBV8-2       | -      |
| ENSG00000239945 | 5.13E-15 | -2.63127 | 1 | 1 RP11-34P13.8  | -      |
| ENSG00000239946 | 5.13E-15 | -2.63127 | 1 | 1 ZBTB20-AS3    | -      |
| ENSG00000239951 | 5.13E-15 | -2.63127 | 1 | 1 IGKV3-20      | -      |
| ENSG00000239953 | 5.13E-15 | -2.63127 | 1 | 1 RN7SL273P     | -      |
| ENSG00000239955 | 5.13E-15 | -2.63127 | 1 | 1 RN7SL673P     | -      |
| ENSG00000239958 | 5.13E-15 | -2.63127 | 1 | 1 RN7SL51P      | -      |
| ENSG00000239959 | 5.13E-15 | -2.63127 | 1 | 1 ENPP7P2       | K12354 |
| ENSG00000239961 | 5.13E-15 | -2.63127 | 1 | 1 LILRA4        | K06512 |
| ENSG00000239964 | 5.13E-15 | -2.63127 | 1 | 1 RN7SL748P     | -      |
| ENSG00000239967 | 5.13E-15 | -2.63127 | 1 | 1 OR2A41P       | K04257 |

|                 |          |          |   |                 |        |
|-----------------|----------|----------|---|-----------------|--------|
| ENSG00000239969 | 5.13E-15 | -2.63127 | 1 | 1 RP11-163E9.2  | K09228 |
| ENSG00000239975 | 5.13E-15 | -2.63127 | 1 | 1 IGKV1D-33     | -      |
| ENSG00000239978 | 5.13E-15 | -2.63127 | 1 | 1 OR7E53P       | K04257 |
| ENSG00000239981 | 5.13E-15 | -2.63127 | 1 | 1 OR2A15P       | K04257 |
| ENSG00000239983 | 5.13E-15 | -2.63127 | 1 | 1 RP11-79E3.1   | K02910 |
| ENSG00000239984 | 5.13E-15 | -2.63127 | 1 | 1 RN7SL420P     | -      |
| ENSG00000239985 | 5.13E-15 | -2.63127 | 1 | 1 RP11-460N20.3 | K05357 |
| ENSG00000239986 | 5.13E-15 | -2.63127 | 1 | 1 RP11-366N18.2 | -      |
| ENSG00000239988 | 5.13E-15 | -2.63127 | 1 | 1 RPL31P60      | -      |
| ENSG00000239989 | 5.13E-15 | -2.63127 | 1 | 1 AC008132.14   | K06522 |
| ENSG00000239991 | 5.13E-15 | -2.63127 | 1 | 1 RP11-889D3.1  | -      |
| ENSG00000239992 | 5.13E-15 | -2.63127 | 1 | 1 TRBVA         | -      |
| ENSG00000239994 | 5.13E-15 | -2.63127 | 1 | 1 RP11-169N13.4 | -      |
| ENSG00000239995 | 5.13E-15 | -2.63127 | 1 | 1 TPT1P11       | -      |
| ENSG00000239997 | 5.13E-15 | -2.63127 | 1 | 1 FCF1P3        | K14566 |
| ENSG00000239998 | 5.13E-15 | -2.63127 | 1 | 1 LILRA2        | K06512 |
| ENSG00000240002 | 5.13E-15 | -2.63127 | 1 | 1 YBX1P3        | K09276 |
| ENSG00000240003 | 5.13E-15 | -2.63127 | 1 | 1 RPL7P24       | K02937 |
| ENSG00000240012 | 5.13E-15 | -2.63127 | 1 | 1 SLC9A9-AS1    | -      |
| ENSG00000240014 | 5.13E-15 | -2.63127 | 1 | 1 RN7SL254P     | -      |
| ENSG00000240015 | 5.13E-15 | -2.63127 | 1 | 1 RP11-90P5.5   | -      |
| ENSG00000240023 | 5.13E-15 | -2.63127 | 1 | 1 RP11-561B11.1 | K02941 |
| ENSG00000240024 | 5.13E-15 | -2.63127 | 1 | 1 LINC00888     | -      |
| ENSG00000240027 | 5.13E-15 | -2.63127 | 1 | 1 RP11-415I12.1 | K02978 |
| ENSG00000240031 | 5.13E-15 | -2.63127 | 1 | 1 OR9A3P        | K04257 |
| ENSG00000240033 | 5.13E-15 | -2.63127 | 1 | 1 RP11-12K11.2  | -      |
| ENSG00000240034 | 5.13E-15 | -2.63127 | 1 | 1 MTND6P6       | -      |
| ENSG00000240040 | 5.13E-15 | -2.63127 | 1 | 1 AC096579.13   | -      |
| ENSG00000240041 | 5.13E-15 | -2.63127 | 1 | 1 IGHJ4         | -      |
| ENSG00000240042 | 5.13E-15 | -2.63127 | 1 | 1 AC098789.1    | K08955 |
| ENSG00000240043 | 5.13E-15 | -2.63127 | 1 | 1 RPS27P26      | K02978 |
| ENSG00000240045 | 5.13E-15 | -2.63127 | 1 | 1 RP11-451G4.2  | -      |
| ENSG00000240047 | 5.13E-15 | -2.63127 | 1 | 1 RPS3AP32      | K02984 |
| ENSG00000240050 | 5.13E-15 | -2.63127 | 1 | 1 RP1-93H18.1   | -      |
| ENSG00000240051 | 5.13E-15 | -2.63127 | 1 | 1 RPL23AP10     | K02893 |
| ENSG00000240052 | 5.13E-15 | -2.63127 | 1 | 1 RP11-289K10.1 | K02966 |
| ENSG00000240053 | 5.13E-15 | -2.63127 | 1 | 1 LY6G5B        | K17985 |
| ENSG00000240056 | 5.13E-15 | -2.63127 | 1 | 1 RP11-349J5.2  | -      |
| ENSG00000240058 | 5.13E-15 | -2.63127 | 1 | 1 ARGFXP1       | K16467 |
| ENSG00000240063 | 5.13E-15 | -2.63127 | 1 | 1 RP11-225N10.1 | -      |
| ENSG00000240065 | 5.13E-15 | -2.63127 | 1 | 1 PSMB9         | K02741 |
| ENSG00000240068 | 5.13E-15 | -2.63127 | 1 | 1 RPL21P42      | K02889 |
| ENSG00000240069 | 5.13E-15 | -2.63127 | 1 | 1 GPAA1P1       | K05289 |
| ENSG00000240083 | 5.13E-15 | -2.63127 | 1 | 1 RPS3AP22      | K02984 |
| ENSG00000240084 | 5.13E-15 | -2.63127 | 1 | 1 RP11-12N13.6  | K03882 |
| ENSG00000240086 | 5.13E-15 | -2.63127 | 1 | 1 RP11-657O9.1  | -      |
| ENSG00000240089 | 5.13E-15 | -2.63127 | 1 | 1 BMS1P3        | K14569 |
| ENSG00000240095 | 5.13E-15 | -2.63127 | 1 | 1 RP11-88H10.3  | -      |
| ENSG00000240096 | 5.13E-15 | -2.63127 | 1 | 1 RP11-85G20.1  | K02882 |
| ENSG00000240097 | 5.13E-15 | -2.63127 | 1 | 1 RP11-641C17.4 | K15031 |
| ENSG00000240098 | 5.13E-15 | -2.63127 | 1 | 1 RN7SL351P     | -      |
| ENSG00000240100 | 5.13E-15 | -2.63127 | 1 | 1 RP11-240G22.1 | -      |
| ENSG00000240103 | 5.13E-15 | -2.63127 | 1 | 1 RP11-846F4.6  | K02256 |
| ENSG00000240107 | 5.13E-15 | -2.63127 | 1 | 1 RP11-628J14.1 | K06085 |
| ENSG00000240108 | 5.13E-15 | -2.63127 | 1 | 1 NCOR1P1       | K04650 |
| ENSG00000240116 | 5.13E-15 | -2.63127 | 1 | 1 RN7SL303P     | -      |
| ENSG00000240121 | 5.13E-15 | -2.63127 | 1 | 1 RPS27P20      | K02978 |
| ENSG00000240122 | 5.13E-15 | -2.63127 | 1 | 1 FABP5P11      | K08754 |

|                 |          |          |   |                 |        |
|-----------------|----------|----------|---|-----------------|--------|
| ENSG00000240125 | 5.13E-15 | -2.63127 | 1 | 1 RP11-58O9.1   | K02893 |
| ENSG00000240128 | 5.13E-15 | -2.63127 | 1 | 1 KRT18P43      | K07604 |
| ENSG00000240131 | 5.13E-15 | -2.63127 | 1 | 1 RP11-124D2.1  | K02924 |
| ENSG00000240138 | 5.13E-15 | -2.63127 | 1 | 1 EEF1GP4       | K03233 |
| ENSG00000240143 | 5.13E-15 | -2.63127 | 1 | 1 RP4-753P9.3   | -      |
| ENSG00000240151 | 5.13E-15 | -2.63127 | 1 | 1 RN7SL826P     | -      |
| ENSG00000240152 | 5.13E-15 | -2.63127 | 1 | 1 RP11-16N2.1   | -      |
| ENSG00000240156 | 5.13E-15 | -2.63127 | 1 | 1 COX6CP6       | K02268 |
| ENSG00000240159 | 5.13E-15 | -2.63127 | 1 | 1 RP11-162O12.1 | -      |
| ENSG00000240165 | 5.13E-15 | -2.63127 | 1 | 1 RN7SL787P     | -      |
| ENSG00000240167 | 5.13E-15 | -2.63127 | 1 | 1 RPS7P7        | K02993 |
| ENSG00000240173 | 5.13E-15 | -2.63127 | 1 | 1 RN7SL771P     | -      |
| ENSG00000240174 | 5.13E-15 | -2.63127 | 1 | 1 RP11-851M3.1  | K02940 |
| ENSG00000240175 | 5.13E-15 | -2.63127 | 1 | 1 MAGI1-AS1     | -      |
| ENSG00000240179 | 5.13E-15 | -2.63127 | 1 | 1 RPL26P3       | K02898 |
| ENSG00000240180 | 5.13E-15 | -2.63127 | 1 | 1 RP11-318E3.4  | K02870 |
| ENSG00000240183 | 5.13E-15 | -2.63127 | 1 | 1 RN7SL297P     | -      |
| ENSG00000240184 | 5.13E-15 | -2.63127 | 1 | 1 PCDHGC3       | K16497 |
| ENSG00000240186 | 5.13E-15 | -2.63127 | 1 | 1 RN7SL633P     | -      |
| ENSG00000240189 | 5.13E-15 | -2.63127 | 1 | 1 RN7SL621P     | -      |
| ENSG00000240194 | 5.13E-15 | -2.63127 | 1 | 1 CYMP          | K01378 |
| ENSG00000240197 | 5.13E-15 | -2.63127 | 1 | 1 AC010518.3    | K06512 |
| ENSG00000240198 | 5.13E-15 | -2.63127 | 1 | 1 ARHGEF3-AS1   | -      |
| ENSG00000240199 | 5.13E-15 | -2.63127 | 1 | 1 RN7SL520P     | -      |
| ENSG00000240201 | 5.13E-15 | -2.63127 | 1 | 1 RP11-269C4.1  | K02991 |
| ENSG00000240202 | 5.13E-15 | -2.63127 | 1 | 1 RN7SL223P     | -      |
| ENSG00000240203 | 5.13E-15 | -2.63127 | 1 | 1 RN7SL567P     | -      |
| ENSG00000240205 | 5.13E-15 | -2.63127 | 1 | 1 RN7SL865P     | -      |
| ENSG00000240210 | 5.13E-15 | -2.63127 | 1 | 1 RP11-204K16.1 | K02936 |
| ENSG00000240215 | 5.13E-15 | -2.63127 | 1 | 1 TRBV25OR9-2   | -      |
| ENSG00000240221 | 5.13E-15 | -2.63127 | 1 | 1 RN7SL196P     | -      |
| ENSG00000240224 | 5.13E-15 | -2.63127 | 1 | 1 UGT1A5        | K00699 |
| ENSG00000240225 | 5.13E-15 | -2.63127 | 1 | 1 ZNF542        | K09228 |
| ENSG00000240231 | 5.13E-15 | -2.63127 | 1 | 1 RPS27P29      | K02978 |
| ENSG00000240235 | 5.13E-15 | -2.63127 | 1 | 1 RN7SL794P     | -      |
| ENSG00000240236 | 5.13E-15 | -2.63127 | 1 | 1 HNRNPA1P23    | K12741 |
| ENSG00000240237 | 5.13E-15 | -2.63127 | 1 | 1 CTD-2182N23.1 | K02889 |
| ENSG00000240238 | 5.13E-15 | -2.63127 | 1 | 1 RP11-112N19.2 | K02889 |
| ENSG00000240240 | 5.13E-15 | -2.63127 | 1 | 1 RP11-146D12.2 | K17299 |
| ENSG00000240241 | 5.13E-15 | -2.63127 | 1 | 1 RP11-314M24.1 | -      |
| ENSG00000240244 | 5.13E-15 | -2.63127 | 1 | 1 GAPDHP33      | K00134 |
| ENSG00000240246 | 5.13E-15 | -2.63127 | 1 | 1 RP11-167H9.1  | -      |
| ENSG00000240247 | 5.13E-15 | -2.63127 | 1 | 1 DEFA1B        | K05230 |
| ENSG00000240250 | 5.13E-15 | -2.63127 | 1 | 1 RN7SL541P     | -      |
| ENSG00000240253 | 5.13E-15 | -2.63127 | 1 | 1 FAR2P3        | K16467 |
| ENSG00000240254 | 5.13E-15 | -2.63127 | 1 | 1 B4GALT4-AS1   | -      |
| ENSG00000240255 | 5.13E-15 | -2.63127 | 1 | 1 PSMC1P6       | K03062 |
| ENSG00000240257 | 5.13E-15 | -2.63127 | 1 | 1 GAGE2D        | -      |
| ENSG00000240265 | 5.13E-15 | -2.63127 | 1 | 1 RP11-62G11.1  | -      |
| ENSG00000240268 | 5.13E-15 | -2.63127 | 1 | 1 MOXD2P        | -      |
| ENSG00000240270 | 5.13E-15 | -2.63127 | 1 | 1 RPL12P37      | K02870 |
| ENSG00000240271 | 5.13E-15 | -2.63127 | 1 | 1 RP11-200A13.2 | K02905 |
| ENSG00000240279 | 5.13E-15 | -2.63127 | 1 | 1 AL353997.4    | K07604 |
| ENSG00000240281 | 5.13E-15 | -2.63127 | 1 | 1 CTD-2062O1.1  | K02981 |
| ENSG00000240286 | 5.13E-15 | -2.63127 | 1 | 1 MEAF6P1       | K11344 |
| ENSG00000240292 | 5.13E-15 | -2.63127 | 1 | 1 RP11-298O21.2 | -      |
| ENSG00000240294 | 5.13E-15 | -2.63127 | 1 | 1 RN7SKP241     | -      |
| ENSG00000240296 | 5.13E-15 | -2.63127 | 1 | 1 AC010492.5    | K08955 |



|                 |          |          |   |                  |        |
|-----------------|----------|----------|---|------------------|--------|
| ENSG00000240298 | 5.13E-15 | -2.63127 | 1 | 1 RPL36AP40      | K02929 |
| ENSG00000240299 | 5.13E-15 | -2.63127 | 1 | 1 RN7SL187P      | -      |
| ENSG00000240302 | 5.13E-15 | -2.63127 | 1 | 1 RN7SL717P      | -      |
| ENSG00000240306 | 5.13E-15 | -2.63127 | 1 | 1 RN7SL100P      | -      |
| ENSG00000240309 | 5.13E-15 | -2.63127 | 1 | 1 RP11-91A15.1   | K02256 |
| ENSG00000240311 | 5.13E-15 | -2.63127 | 1 | 1 LA16c-306E5.1  | K02883 |
| ENSG00000240317 | 5.13E-15 | -2.63127 | 1 | 1 RN7SL764P      | -      |
| ENSG00000240320 | 5.13E-15 | -2.63127 | 1 | 1 AC006133.3     | -      |
| ENSG00000240327 | 5.13E-15 | -2.63127 | 1 | 1 RN7SL93P       | -      |
| ENSG00000240328 | 5.13E-15 | -2.63127 | 1 | 1 RP11-841C19.1  | K02915 |
| ENSG00000240341 | 5.13E-15 | -2.63127 | 1 | 1 AL162853.1     | -      |
| ENSG00000240347 | 5.13E-15 | -2.63127 | 1 | 1 RN7SL35P       | -      |
| ENSG00000240354 | 5.13E-15 | -2.63127 | 1 | 1 RP11-774I5.1   | -      |
| ENSG00000240355 | 5.13E-15 | -2.63127 | 1 | 1 AC004869.3     | -      |
| ENSG00000240359 | 5.13E-15 | -2.63127 | 1 | 1 UBL5P3         | -      |
| ENSG00000240361 | 5.13E-15 | -2.63127 | 1 | 1 OR4G11P        | K04257 |
| ENSG00000240370 | 5.13E-15 | -2.63127 | 1 | 1 RPL13P5        | K02873 |
| ENSG00000240371 | 5.13E-15 | -2.63127 | 1 | 1 RPS4XP13       | K02987 |
| ENSG00000240374 | 5.13E-15 | -2.63127 | 1 | 1 RN7SL503P      | -      |
| ENSG00000240375 | 5.13E-15 | -2.63127 | 1 | 1 VPS26AP1       | K18466 |
| ENSG00000240382 | 5.13E-15 | -2.63127 | 1 | 1 IGKV1-17       | -      |
| ENSG00000240386 | 5.13E-15 | -2.63127 | 1 | 1 LCE1F          | -      |
| ENSG00000240388 | 5.13E-15 | -2.63127 | 1 | 1 CTD-2061E19.1  | K02964 |
| ENSG00000240392 | 5.13E-15 | -2.63127 | 1 | 1 RPL9P3         | K02940 |
| ENSG00000240393 | 5.13E-15 | -2.63127 | 1 | 1 RP11-768G7.1   | -      |
| ENSG00000240403 | 5.13E-15 | -2.63127 | 1 | 1 KIR3DL2        | K07980 |
| ENSG00000240404 | 5.13E-15 | -2.63127 | 1 | 1 RP11-142L1.3   | K11290 |
| ENSG00000240405 | 5.13E-15 | -2.63127 | 1 | 1 RP11-460N16.1  | -      |
| ENSG00000240409 | 5.13E-15 | -2.63127 | 1 | 1 MTATP8P1       | K02125 |
| ENSG00000240411 | 5.13E-15 | -2.63127 | 1 | 1 RPL5P16        | -      |
| ENSG00000240412 | 5.13E-15 | -2.63127 | 1 | 1 RPL5P15        | K02932 |
| ENSG00000240416 | 5.13E-15 | -2.63127 | 1 | 1 CYCSP20        | K08738 |
| ENSG00000240419 | 5.13E-15 | -2.63127 | 1 | 1 RP11-545E8.1   | -      |
| ENSG00000240423 | 5.13E-15 | -2.63127 | 1 | 1 LINC00636      | -      |
| ENSG00000240424 | 5.13E-15 | -2.63127 | 1 | 1 RP11-158N24.1  | K02885 |
| ENSG00000240426 | 5.13E-15 | -2.63127 | 1 | 1 RP11-356M17.1  | K02929 |
| ENSG00000240427 | 5.13E-15 | -2.63127 | 1 | 1 RPS26P34       | K02976 |
| ENSG00000240432 | 5.13E-15 | -2.63127 | 1 | 1 KRTAP13-3      | -      |
| ENSG00000240435 | 5.13E-15 | -2.63127 | 1 | 1 RPS12P27       | K02951 |
| ENSG00000240438 | 5.13E-15 | -2.63127 | 1 | 1 OFD1P5Y        | K16480 |
| ENSG00000240439 | 5.13E-15 | -2.63127 | 1 | 1 RN7SL91P       | -      |
| ENSG00000240440 | 5.13E-15 | -2.63127 | 1 | 1 AC007879.3     | -      |
| ENSG00000240441 | 5.13E-15 | -2.63127 | 1 | 1 RP11-864J10.2  | K02880 |
| ENSG00000240443 | 5.13E-15 | -2.63127 | 1 | 1 RPS10P20       | K02947 |
| ENSG00000240450 | 5.13E-15 | -2.63127 | 1 | 1 CSPG4P1Y       | -      |
| ENSG00000240452 | 5.13E-15 | -2.63127 | 1 | 1 RP11-567P17.1  | K02256 |
| ENSG00000240453 | 5.13E-15 | -2.63127 | 1 | 1 RP11-206L10.10 | -      |
| ENSG00000240454 | 5.13E-15 | -2.63127 | 1 | 1 RPL39P26       | K02924 |
| ENSG00000240457 | 5.13E-15 | -2.63127 | 1 | 1 RN7SL472P      | -      |
| ENSG00000240458 | 5.13E-15 | -2.63127 | 1 | 1 RP11-450H5.3   | K03948 |
| ENSG00000240459 | 5.13E-15 | -2.63127 | 1 | 1 RP11-477G18.1  | K02951 |
| ENSG00000240466 | 5.13E-15 | -2.63127 | 1 | 1 RN7SL331P      | -      |
| ENSG00000240470 | 5.13E-15 | -2.63127 | 1 | 1 RN7SL346P      | -      |
| ENSG00000240471 | 5.13E-15 | -2.63127 | 1 | 1 PHBP8          | K17080 |
| ENSG00000240474 | 5.13E-15 | -2.63127 | 1 | 1 RN7SL116P      | -      |
| ENSG00000240477 | 5.13E-15 | -2.63127 | 1 | 1 RP11-63E16.1   | K03245 |
| ENSG00000240478 | 5.13E-15 | -2.63127 | 1 | 1 RP11-416O18.2  | -      |
| ENSG00000240480 | 5.13E-15 | -2.63127 | 1 | 1 RPL29P2        | K02905 |

|                 |          |          |   |                 |        |
|-----------------|----------|----------|---|-----------------|--------|
| ENSG00000240481 | 5.13E-15 | -2.63127 | 1 | 1 RN7SL38P      | -      |
| ENSG00000240484 | 5.13E-15 | -2.63127 | 1 | 1 RP11-386M24.1 | K02910 |
| ENSG00000240486 | 5.13E-15 | -2.63127 | 1 | 1 RPL23AP54     | K02893 |
| ENSG00000240487 | 5.13E-15 | -2.63127 | 1 | 1 RP11-553L6.3  | -      |
| ENSG00000240490 | 5.13E-15 | -2.63127 | 1 | 1 RN7SL277P     | -      |
| ENSG00000240494 | 5.13E-15 | -2.63127 | 1 | 1 RPS12P28      | -      |
| ENSG00000240499 | 5.13E-15 | -2.63127 | 1 | 1 RP5-1101C3.1  | -      |
| ENSG00000240502 | 5.13E-15 | -2.63127 | 1 | 1 RN7SL837P     | -      |
| ENSG00000240505 | 5.13E-15 | -2.63127 | 1 | 1 TNFRSF13B     | K05150 |
| ENSG00000240510 | 5.13E-15 | -2.63127 | 1 | 1 AL589765.1    | -      |
| ENSG00000240511 | 5.13E-15 | -2.63127 | 1 | 1 MED28P2       | -      |
| ENSG00000240513 | 5.13E-15 | -2.63127 | 1 | 1 RP11-829H16.1 | K02901 |
| ENSG00000240518 | 5.13E-15 | -2.63127 | 1 | 1 RP11-515C16.1 | K02920 |
| ENSG00000240519 | 5.13E-15 | -2.63127 | 1 | 1 RP11-384C12.1 | K02942 |
| ENSG00000240520 | 5.13E-15 | -2.63127 | 1 | 1 UOX           | K00365 |
| ENSG00000240521 | 5.13E-15 | -2.63127 | 1 | 1 RP11-680B3.2  | -      |
| ENSG00000240524 | 5.13E-15 | -2.63127 | 1 | 1 RP5-1061H20.3 | -      |
| ENSG00000240527 | 5.13E-15 | -2.63127 | 1 | 1 RP11-429G19.3 | -      |
| ENSG00000240531 | 5.13E-15 | -2.63127 | 1 | 1 RPL21P123     | K02889 |
| ENSG00000240533 | 5.13E-15 | -2.63127 | 1 | 1 RN7SL69P      | -      |
| ENSG00000240534 | 5.13E-15 | -2.63127 | 1 | 1 RPL34P17      | K02915 |
| ENSG00000240535 | 5.13E-15 | -2.63127 | 1 | 1 CTD-2313F11.1 | -      |
| ENSG00000240540 | 5.13E-15 | -2.63127 | 1 | 1 RPL3P9        | K02925 |
| ENSG00000240542 | 5.13E-15 | -2.63127 | 1 | 1 KRTAP9-1      | -      |
| ENSG00000240545 | 5.13E-15 | -2.63127 | 1 | 1 RN7SL492P     | -      |
| ENSG00000240554 | 5.13E-15 | -2.63127 | 1 | 1 RPL7AP58      | K02936 |
| ENSG00000240562 | 5.13E-15 | -2.63127 | 1 | 1 RP11-59J16.2  | -      |
| ENSG00000240563 | 5.13E-15 | -2.63127 | 1 | 1 L1TD1         | K17985 |
| ENSG00000240566 | 5.13E-15 | -2.63127 | 1 | 1 AC010153.3    | K09228 |
| ENSG00000240567 | 5.13E-15 | -2.63127 | 1 | 1 RP11-3P17.4   | -      |
| ENSG00000240568 | 5.13E-15 | -2.63127 | 1 | 1 RP11-1008M1.1 | -      |
| ENSG00000240572 | 5.13E-15 | -2.63127 | 1 | 1 RP11-121C1.1  | -      |
| ENSG00000240573 | 5.13E-15 | -2.63127 | 1 | 1 RP11-354H21.2 | -      |
| ENSG00000240577 | 5.13E-15 | -2.63127 | 1 | 1 RN7SL445P     | -      |
| ENSG00000240578 | 5.13E-15 | -2.63127 | 1 | 1 TRBV22-1      | -      |
| ENSG00000240579 | 5.13E-15 | -2.63127 | 1 | 1 RP11-20L24.1  | K13099 |
| ENSG00000240584 | 5.13E-15 | -2.63127 | 1 | 1 RN7SL547P     | -      |
| ENSG00000240589 | 5.13E-15 | -2.63127 | 1 | 1 RN7SL258P     | -      |
| ENSG00000240590 | 5.13E-15 | -2.63127 | 1 | 1 RP11-403P13.1 | K02998 |
| ENSG00000240596 | 5.13E-15 | -2.63127 | 1 | 1 KCNAB1-AS2    | -      |
| ENSG00000240601 | 5.13E-15 | -2.63127 | 1 | 1 RPL9P15       | K02940 |
| ENSG00000240602 | 5.13E-15 | -2.63127 | 1 | 1 RP11-64D22.2  | K13616 |
| ENSG00000240606 | 5.13E-15 | -2.63127 | 1 | 1 RN7SL564P     | -      |
| ENSG00000240611 | 5.13E-15 | -2.63127 | 1 | 1 CTB-49A3.1    | K02934 |
| ENSG00000240613 | 5.13E-15 | -2.63127 | 1 | 1 RN7SL98P      | -      |
| ENSG00000240618 | 5.13E-15 | -2.63127 | 1 | 1 RP11-206L10.5 | -      |
| ENSG00000240621 | 5.13E-15 | -2.63127 | 1 | 1 OR2AO1P       | K04257 |
| ENSG00000240622 | 5.13E-15 | -2.63127 | 1 | 1 RPL7P15       | K02937 |
| ENSG00000240624 | 5.13E-15 | -2.63127 | 1 | 1 RP11-45P15.2  | K02880 |
| ENSG00000240625 | 5.13E-15 | -2.63127 | 1 | 1 RN7SL403P     | -      |
| ENSG00000240626 | 5.13E-15 | -2.63127 | 1 | 1 RN7SL150P     | -      |
| ENSG00000240627 | 5.13E-15 | -2.63127 | 1 | 1 CTD-2312P21.1 | K02947 |
| ENSG00000240631 | 5.13E-15 | -2.63127 | 1 | 1 RPL30P12      | K02908 |
| ENSG00000240632 | 5.13E-15 | -2.63127 | 1 | 1 SPATA31D5P    | K17556 |
| ENSG00000240637 | 5.13E-15 | -2.63127 | 1 | 1 RN7SL808P     | -      |
| ENSG00000240639 | 5.13E-15 | -2.63127 | 1 | 1 RN7SL666P     | -      |
| ENSG00000240641 | 5.13E-15 | -2.63127 | 1 | 1 RN7SL580P     | -      |
| ENSG00000240647 | 5.13E-15 | -2.63127 | 1 | 1 RN7SL305P     | -      |

|                 |          |          |   |                 |        |
|-----------------|----------|----------|---|-----------------|--------|
| ENSG00000240651 | 5.13E-15 | -2.63127 | 1 | 1 SEPT7P4       | K16944 |
| ENSG00000240652 | 5.13E-15 | -2.63127 | 1 | 1 RP11-832N8.1  | K02943 |
| ENSG00000240654 | 5.13E-15 | -2.63127 | 1 | 1 C1QTNF9       | -      |
| ENSG00000240661 | 5.13E-15 | -2.63127 | 1 | 1 RP11-174O3.3  | -      |
| ENSG00000240663 | 5.13E-15 | -2.63127 | 1 | 1 RN7SL310P     | -      |
| ENSG00000240665 | 5.13E-15 | -2.63127 | 1 | 1 LSP1P2        | K14957 |
| ENSG00000240666 | 5.13E-15 | -2.63127 | 1 | 1 MME-AS1       | -      |
| ENSG00000240667 | 5.13E-15 | -2.63127 | 1 | 1 AL450992.6    | -      |
| ENSG00000240669 | 5.13E-15 | -2.63127 | 1 | 1 RP11-555K12.2 | K02955 |
| ENSG00000240671 | 5.13E-15 | -2.63127 | 1 | 1 IGKV1-8       | -      |
| ENSG00000240673 | 5.13E-15 | -2.63127 | 1 | 1 AC006539.2    | K02995 |
| ENSG00000240674 | 5.13E-15 | -2.63127 | 1 | 1 RP11-366M4.1  | K02889 |
| ENSG00000240677 | 5.13E-15 | -2.63127 | 1 | 1 MYL6P4        | K12751 |
| ENSG00000240680 | 5.13E-15 | -2.63127 | 1 | 1 AC016831.3    | -      |
| ENSG00000240685 | 5.13E-15 | -2.63127 | 1 | 1 RP11-286H14.6 | -      |
| ENSG00000240692 | 5.13E-15 | -2.63127 | 1 | 1 RN7SL538P     | -      |
| ENSG00000240698 | 5.13E-15 | -2.63127 | 1 | 1 RPS2P39       | K02981 |
| ENSG00000240704 | 5.13E-15 | -2.63127 | 1 | 1 KLF7P1        | K09207 |
| ENSG00000240707 | 5.13E-15 | -2.63127 | 1 | 1 LINC01168     | -      |
| ENSG00000240708 | 5.13E-15 | -2.63127 | 1 | 1 RP11-64C1.1   | -      |
| ENSG00000240713 | 5.13E-15 | -2.63127 | 1 | 1 RN7SL860P     | -      |
| ENSG00000240721 | 5.13E-15 | -2.63127 | 1 | 1 RPS4XP15      | K02987 |
| ENSG00000240729 | 5.13E-15 | -2.63127 | 1 | 1 CTD-2301A4.3  | K02889 |
| ENSG00000240730 | 5.13E-15 | -2.63127 | 1 | 1 RN7SL710P     | -      |
| ENSG00000240733 | 5.13E-15 | -2.63127 | 1 | 1 RN7SL502P     | -      |
| ENSG00000240738 | 5.13E-15 | -2.63127 | 1 | 1 RP1-273G13.1  | K02934 |
| ENSG00000240747 | 5.13E-15 | -2.63127 | 1 | 1 KRBOX1        | K09228 |
| ENSG00000240750 | 5.13E-15 | -2.63127 | 1 | 1 RN7SL559P     | -      |
| ENSG00000240752 | 5.13E-15 | -2.63127 | 1 | 1 RP11-588D3.1  | -      |
| ENSG00000240754 | 5.13E-15 | -2.63127 | 1 | 1 RP11-38J22.6  | -      |
| ENSG00000240755 | 5.13E-15 | -2.63127 | 1 | 1 ERLEC1P1      | -      |
| ENSG00000240759 | 5.13E-15 | -2.63127 | 1 | 1 RP11-25I15.1  | K02978 |
| ENSG00000240760 | 5.13E-15 | -2.63127 | 1 | 1 RPL31P56      | K02910 |
| ENSG00000240761 | 5.13E-15 | -2.63127 | 1 | 1 AC098831.4    | K11001 |
| ENSG00000240764 | 5.13E-15 | -2.63127 | 1 | 1 PCDHGC5       | K16497 |
| ENSG00000240766 | 5.13E-15 | -2.63127 | 1 | 1 PLCXD2-AS1    | -      |
| ENSG00000240767 | 5.13E-15 | -2.63127 | 1 | 1 RN7SL288P     | -      |
| ENSG00000240770 | 5.13E-15 | -2.63127 | 1 | 1 C21orf91-OT1  | -      |
| ENSG00000240772 | 5.13E-15 | -2.63127 | 1 | 1 RN7SL776P     | -      |
| ENSG00000240774 | 5.13E-15 | -2.63127 | 1 | 1 RP11-359H3.4  | -      |
| ENSG00000240776 | 5.13E-15 | -2.63127 | 1 | 1 RP11-435F17.1 | K02947 |
| ENSG00000240777 | 5.13E-15 | -2.63127 | 1 | 1 RP11-58O15.1  | -      |
| ENSG00000240785 | 5.13E-15 | -2.63127 | 1 | 1 RPL36AP21     | K02929 |
| ENSG00000240787 | 5.13E-15 | -2.63127 | 1 | 1 RP11-615J4.4  | K06531 |
| ENSG00000240790 | 5.13E-15 | -2.63127 | 1 | 1 AC073934.6    | -      |
| ENSG00000240791 | 5.13E-15 | -2.63127 | 1 | 1 RP11-100G15.5 | -      |
| ENSG00000240792 | 5.13E-15 | -2.63127 | 1 | 1 RP11-418B12.1 | -      |
| ENSG00000240796 | 5.13E-15 | -2.63127 | 1 | 1 MTND2P14      | -      |
| ENSG00000240800 | 5.13E-15 | -2.63127 | 1 | 1 ATP8A2P1      | K14802 |
| ENSG00000240801 | 5.13E-15 | -2.63127 | 1 | 1 AC132217.4    | -      |
| ENSG00000240803 | 5.13E-15 | -2.63127 | 1 | 1 RN7SL231P     | -      |
| ENSG00000240804 | 5.13E-15 | -2.63127 | 1 | 1 NPM1P28       | K11276 |
| ENSG00000240808 | 5.13E-15 | -2.63127 | 1 | 1 CTD-3236F5.1  | K02915 |
| ENSG00000240809 | 5.13E-15 | -2.63127 | 1 | 1 RP11-550F7.1  | K17261 |
| ENSG00000240813 | 5.13E-15 | -2.63127 | 1 | 1 RP11-963H4.2  | -      |
| ENSG00000240820 | 5.13E-15 | -2.63127 | 1 | 1 RN7SL695P     | -      |
| ENSG00000240821 | 5.13E-15 | -2.63127 | 1 | 1 RPL9P25       | K02940 |
| ENSG00000240824 | 5.13E-15 | -2.63127 | 1 | 1 MTND3P7       | -      |

|                 |          |          |   |                 |        |
|-----------------|----------|----------|---|-----------------|--------|
| ENSG00000240827 | 5.13E-15 | -2.63127 | 1 | 1 RP11-227H4.1  | —      |
| ENSG00000240828 | 5.13E-15 | -2.63127 | 1 | 1 RPL21P4       | K02889 |
| ENSG00000240834 | 5.13E-15 | -2.63127 | 1 | 1 IGKV1D-12     | —      |
| ENSG00000240837 | 5.13E-15 | -2.63127 | 1 | 1 RN7SL77P      | —      |
| ENSG00000240842 | 5.13E-15 | -2.63127 | 1 | 1 RP11-62G11.2  | —      |
| ENSG00000240846 | 5.13E-15 | -2.63127 | 1 | 1 RPS15P9       | K02958 |
| ENSG00000240847 | 5.13E-15 | -2.63127 | 1 | 1 RN7SL497P     | —      |
| ENSG00000240853 | 5.13E-15 | -2.63127 | 1 | 1 RN7SL328P     | —      |
| ENSG00000240854 | 5.13E-15 | -2.63127 | 1 | 1 RP11-64K7.1   | K03061 |
| ENSG00000240859 | 5.13E-15 | -2.63127 | 1 | 1 AC093627.10   | —      |
| ENSG00000240861 | 5.13E-15 | -2.63127 | 1 | 1 RP11-572F4.1  | K02947 |
| ENSG00000240863 | 5.13E-15 | -2.63127 | 1 | 1 RN7SL645P     | —      |
| ENSG00000240864 | 5.13E-15 | -2.63127 | 1 | 1 IGKV1-16      | —      |
| ENSG00000240868 | 5.13E-15 | -2.63127 | 1 | 1 C1QTNF9-AS1   | —      |
| ENSG00000240869 | 5.13E-15 | -2.63127 | 1 | 1 RN7SL128P     | —      |
| ENSG00000240870 | 5.13E-15 | -2.63127 | 1 | 1 RPL19P14      | K02885 |
| ENSG00000240871 | 5.13E-15 | -2.63127 | 1 | 1 KRTAP4-7      | —      |
| ENSG00000240873 | 5.13E-15 | -2.63127 | 1 | 1 RPS29P22      | K02980 |
| ENSG00000240874 | 5.13E-15 | -2.63127 | 1 | 1 CTD-2515H24.1 | K02953 |
| ENSG00000240881 | 5.13E-15 | -2.63127 | 1 | 1 RP11-713P14.1 | K02981 |
| ENSG00000240888 | 5.13E-15 | -2.63127 | 1 | 1 RP13-635I23.3 | —      |
| ENSG00000240890 | 5.13E-15 | -2.63127 | 1 | 1 RP11-65E22.2  | —      |
| ENSG00000240893 | 5.13E-15 | -2.63127 | 1 | 1 RP11-572C15.5 | —      |
| ENSG00000240895 | 5.13E-15 | -2.63127 | 1 | 1 RP11-119D18.1 | —      |
| ENSG00000240902 | 5.13E-15 | -2.63127 | 1 | 1 APOOP2        | —      |
| ENSG00000240907 | 5.13E-15 | -2.63127 | 1 | 1 BX255923.3    | —      |
| ENSG00000240912 | 5.13E-15 | -2.63127 | 1 | 1 RP11-274J15.2 | K11252 |
| ENSG00000240913 | 5.13E-15 | -2.63127 | 1 | 1 RN7SL856P     | —      |
| ENSG00000240914 | 5.13E-15 | -2.63127 | 1 | 1 RPL15P2       | K02877 |
| ENSG00000240919 | 5.13E-15 | -2.63127 | 1 | 1 RP11-400K9.1  | K02889 |
| ENSG00000240922 | 5.13E-15 | -2.63127 | 1 | 1 LSAMP-AS1     | —      |
| ENSG00000240925 | 5.13E-15 | -2.63127 | 1 | 1 RPS20P31      | K02969 |
| ENSG00000240927 | 5.13E-15 | -2.63127 | 1 | 1 RN7SL209P     | —      |
| ENSG00000240929 | 5.13E-15 | -2.63127 | 1 | 1 HIST2H2BB     | K11252 |
| ENSG00000240934 | 5.13E-15 | -2.63127 | 1 | 1 RP11-925D8.1  | K02903 |
| ENSG00000240935 | 5.13E-15 | -2.63127 | 1 | 1 PLGLA         | K01315 |
| ENSG00000240936 | 5.13E-15 | -2.63127 | 1 | 1 RN7SL554P     | —      |
| ENSG00000240940 | 5.13E-15 | -2.63127 | 1 | 1 RN7SL591P     | —      |
| ENSG00000240951 | 5.13E-15 | -2.63127 | 1 | 1 RP11-91A15.2  | —      |
| ENSG00000240954 | 5.13E-15 | -2.63127 | 1 | 1 RPL4P1        | K02930 |
| ENSG00000240959 | 5.13E-15 | -2.63127 | 1 | 1 ST13P14       | K09560 |
| ENSG00000240960 | 5.13E-15 | -2.63127 | 1 | 1 RP11-521D12.4 | —      |
| ENSG00000240961 | 5.13E-15 | -2.63127 | 1 | 1 RN7SL415P     | —      |
| ENSG00000240963 | 5.13E-15 | -2.63127 | 1 | 1 RP11-518L10.5 | —      |
| ENSG00000240970 | 5.13E-15 | -2.63127 | 1 | 1 RPL23AP64     | K02893 |
| ENSG00000240973 | 5.13E-15 | -2.63127 | 1 | 1 RP11-458K10.2 | —      |
| ENSG00000240977 | 5.13E-15 | -2.63127 | 1 | 1 RN7SL283P     | —      |
| ENSG00000240979 | 5.13E-15 | -2.63127 | 1 | 1 RP11-79D8.2   | —      |
| ENSG00000240980 | 5.13E-15 | -2.63127 | 1 | 1 RP11-734K21.4 | —      |
| ENSG00000240983 | 5.13E-15 | -2.63127 | 1 | 1 RP11-742D12.1 | K02971 |
| ENSG00000240992 | 5.13E-15 | -2.63127 | 1 | 1 RPS23P4       | —      |
| ENSG00000240993 | 5.13E-15 | -2.63127 | 1 | 1 RN7SL459P     | —      |
| ENSG00000240994 | 5.13E-15 | -2.63127 | 1 | 1 RN7SL61P      | —      |
| ENSG00000240995 | 5.13E-15 | -2.63127 | 1 | 1 RP11-708H21.1 | K02947 |
| ENSG00000240997 | 5.13E-15 | -2.63127 | 1 | 1 RN7SL183P     | —      |
| ENSG00000241002 | 5.13E-15 | -2.63127 | 1 | 1 RP11-119H12.1 | K02912 |
| ENSG00000241003 | 5.13E-15 | -2.63127 | 1 | 1 RP11-22C11.1  | K02957 |
| ENSG00000241008 | 5.13E-15 | -2.63127 | 1 | 1 RP11-494M8.1  | K02936 |

|                 |          |          |   |                 |        |
|-----------------|----------|----------|---|-----------------|--------|
| ENSG00000241018 | 5.13E-15 | -2.63127 | 1 | 1 RCC2P5        | —      |
| ENSG00000241020 | 5.13E-15 | -2.63127 | 1 | 1 RP11-727A23.1 | K02912 |
| ENSG00000241022 | 5.13E-15 | -2.63127 | 1 | 1 NIPA2P2       | —      |
| ENSG00000241032 | 5.13E-15 | -2.63127 | 1 | 1 RN7SL709P     | —      |
| ENSG00000241034 | 5.13E-15 | -2.63127 | 1 | 1 RN7SL545P     | —      |
| ENSG00000241037 | 5.13E-15 | -2.63127 | 1 | 1 RN7SL335P     | —      |
| ENSG00000241042 | 5.13E-15 | -2.63127 | 1 | 1 RP11-145M4.1  | —      |
| ENSG00000241045 | 5.13E-15 | -2.63127 | 1 | 1 RPL7P43       | K02937 |
| ENSG00000241048 | 5.13E-15 | -2.63127 | 1 | 1 RP11-167H9.5  | —      |
| ENSG00000241052 | 5.13E-15 | -2.63127 | 1 | 1 RP11-173D9.1  | K02893 |
| ENSG00000241054 | 5.13E-15 | -2.63127 | 1 | 1 RP5-1002M8.4  | —      |
| ENSG00000241059 | 5.13E-15 | -2.63127 | 1 | 1 CTD-2061E19.6 | —      |
| ENSG00000241061 | 5.13E-15 | -2.63127 | 1 | 1 RPL5P1        | K02932 |
| ENSG00000241064 | 5.13E-15 | -2.63127 | 1 | 1 RN7SL110P     | —      |
| ENSG00000241067 | 5.13E-15 | -2.63127 | 1 | 1 RPL17P40      | K02880 |
| ENSG00000241069 | 5.13E-15 | -2.63127 | 1 | 1 CTD-3141N22.1 | K02924 |
| ENSG00000241073 | 5.13E-15 | -2.63127 | 1 | 1 RP4-714D9.2   | —      |
| ENSG00000241074 | 5.13E-15 | -2.63127 | 1 | 1 RN7SL813P     | —      |
| ENSG00000241075 | 5.13E-15 | -2.63127 | 1 | 1 RN7SL719P     | —      |
| ENSG00000241082 | 5.13E-15 | -2.63127 | 1 | 1 RN7SL259P     | —      |
| ENSG00000241088 | 5.13E-15 | -2.63127 | 1 | 1 RPL17P44      | K02880 |
| ENSG00000241097 | 5.13E-15 | -2.63127 | 1 | 1 RP11-864N7.1  | K02929 |
| ENSG00000241098 | 5.13E-15 | -2.63127 | 1 | 1 RP11-139K4.1  | —      |
| ENSG00000241101 | 5.13E-15 | -2.63127 | 1 | 1 PRICKLE2-AS2  | —      |
| ENSG00000241102 | 5.13E-15 | -2.63127 | 1 | 1 RP11-286H14.2 | —      |
| ENSG00000241103 | 5.13E-15 | -2.63127 | 1 | 1 RP11-398J16.1 | K02917 |
| ENSG00000241105 | 5.13E-15 | -2.63127 | 1 | 1 RP11-333A23.2 | K02873 |
| ENSG00000241106 | 5.13E-15 | -2.63127 | 1 | 1 HLA-DOB       | K06752 |
| ENSG00000241112 | 5.13E-15 | -2.63127 | 1 | 1 RPL29P14      | K02905 |
| ENSG00000241114 | 5.13E-15 | -2.63127 | 1 | 1 AC008280.3    | K02976 |
| ENSG00000241119 | 5.13E-15 | -2.63127 | 1 | 1 UGT1A9        | K00699 |
| ENSG00000241123 | 5.13E-15 | -2.63127 | 1 | 1 KRTAP10-5     | —      |
| ENSG00000241125 | 5.13E-15 | -2.63127 | 1 | 1 RP11-508N22.9 | —      |
| ENSG00000241128 | 5.13E-15 | -2.63127 | 1 | 1 OR14A2        | K04257 |
| ENSG00000241129 | 5.13E-15 | -2.63127 | 1 | 1 RPL22P19      | K02891 |
| ENSG00000241130 | 5.13E-15 | -2.63127 | 1 | 1 RP11-507J18.1 | —      |
| ENSG00000241131 | 5.13E-15 | -2.63127 | 1 | 1 RP11-639B1.1  | —      |
| ENSG00000241134 | 5.13E-15 | -2.63127 | 1 | 1 RP5-1051J4.4  | K08504 |
| ENSG00000241135 | 5.13E-15 | -2.63127 | 1 | 1 LINC00881     | —      |
| ENSG00000241136 | 5.13E-15 | -2.63127 | 1 | 1 PAICSP6       | K01587 |
| ENSG00000241143 | 5.13E-15 | -2.63127 | 1 | 1 RPL32P9       | K02912 |
| ENSG00000241144 | 5.13E-15 | -2.63127 | 1 | 1 RN7SL728P     | —      |
| ENSG00000241149 | 5.13E-15 | -2.63127 | 1 | 1 RP11-561N12.2 | K09228 |
| ENSG00000241151 | 5.13E-15 | -2.63127 | 1 | 1 RP11-454C18.1 | —      |
| ENSG00000241152 | 5.13E-15 | -2.63127 | 1 | 1 RN7SL720P     | —      |
| ENSG00000241155 | 5.13E-15 | -2.63127 | 1 | 1 ARHGAP31-AS1  | —      |
| ENSG00000241156 | 5.13E-15 | -2.63127 | 1 | 1 RN7SL582P     | —      |
| ENSG00000241158 | 5.13E-15 | -2.63127 | 1 | 1 ADAMTS9-AS1   | —      |
| ENSG00000241159 | 5.13E-15 | -2.63127 | 1 | 1 RN7SL160P     | —      |
| ENSG00000241162 | 5.13E-15 | -2.63127 | 1 | 1 RN7SL617P     | —      |
| ENSG00000241163 | 5.13E-15 | -2.63127 | 1 | 1 LINC00877     | —      |
| ENSG00000241167 | 5.13E-15 | -2.63127 | 1 | 1 RN7SL469P     | —      |
| ENSG00000241168 | 5.13E-15 | -2.63127 | 1 | 1 RP11-10022.1  | —      |
| ENSG00000241169 | 5.13E-15 | -2.63127 | 1 | 1 RP4-752I6.1   | —      |
| ENSG00000241172 | 5.13E-15 | -2.63127 | 1 | 1 RN7SL70P      | —      |
| ENSG00000241174 | 5.13E-15 | -2.63127 | 1 | 1 RN7SL570P     | —      |
| ENSG00000241175 | 5.13E-15 | -2.63127 | 1 | 1 RN7SL494P     | —      |
| ENSG00000241179 | 5.13E-15 | -2.63127 | 1 | 1 CTB-2L9.1     | K02915 |

|                 |          |          |   |                    |        |
|-----------------|----------|----------|---|--------------------|--------|
| ENSG00000241183 | 5.13E-15 | -2.63127 | 1 | 1 RP11-106J23.1    | K02947 |
| ENSG00000241185 | 5.13E-15 | -2.63127 | 1 | 1 RPL21P122        | K04613 |
| ENSG00000241186 | 5.13E-15 | -2.63127 | 1 | 1 TDGF1            | -      |
| ENSG00000241187 | 5.13E-15 | -2.63127 | 1 | 1 CTC-209L16.1     | K02889 |
| ENSG00000241188 | 5.13E-15 | -2.63127 | 1 | 1 RN7SL165P        | -      |
| ENSG00000241198 | 5.13E-15 | -2.63127 | 1 | 1 RN7SL191P        | -      |
| ENSG00000241200 | 5.13E-15 | -2.63127 | 1 | 1 ZNF736P7Y        | K09228 |
| ENSG00000241202 | 5.13E-15 | -2.63127 | 1 | 1 ZIC4-AS1         | -      |
| ENSG00000241203 | 5.13E-15 | -2.63127 | 1 | 1 HMGN2P26         | -      |
| ENSG00000241204 | 5.13E-15 | -2.63127 | 1 | 1 RP11-333A23.1    | K02964 |
| ENSG00000241207 | 5.13E-15 | -2.63127 | 1 | 1 RP11-344N17.3    | K15625 |
| ENSG00000241211 | 5.13E-15 | -2.63127 | 1 | 1 IQCJ-SCHIP1-AS1  | -      |
| ENSG00000241213 | 5.13E-15 | -2.63127 | 1 | 1 RP11-768G7.2     | -      |
| ENSG00000241216 | 5.13E-15 | -2.63127 | 1 | 1 SNAPC5P1         | K15211 |
| ENSG00000241219 | 5.13E-15 | -2.63127 | 1 | 1 RP11-572M11.1    | -      |
| ENSG00000241220 | 5.13E-15 | -2.63127 | 1 | 1 RP11-292E.2.1    | -      |
| ENSG00000241221 | 5.13E-15 | -2.63127 | 1 | 1 AC009960.6       | -      |
| ENSG00000241223 | 5.13E-15 | -2.63127 | 1 | 1 RN7SL39P         | -      |
| ENSG00000241224 | 5.13E-15 | -2.63127 | 1 | 1 RP11-59E19.1     | -      |
| ENSG00000241225 | 5.13E-15 | -2.63127 | 1 | 1 TRNAS30P         | -      |
| ENSG00000241226 | 5.13E-15 | -2.63127 | 1 | 1 RN7SL836P        | -      |
| ENSG00000241227 | 5.13E-15 | -2.63127 | 1 | 1 RN7SL553P        | -      |
| ENSG00000241228 | 5.13E-15 | -2.63127 | 1 | 1 RP5-916O11.1     | K02870 |
| ENSG00000241229 | 5.13E-15 | -2.63127 | 1 | 1 RN7SL443P        | -      |
| ENSG00000241230 | 5.13E-15 | -2.63127 | 1 | 1 RN7SL801P        | -      |
| ENSG00000241231 | 5.13E-15 | -2.63127 | 1 | 1 RP11-275H4.1     | -      |
| ENSG00000241233 | 5.13E-15 | -2.63127 | 1 | 1 KRTAP5-8         | -      |
| ENSG00000241241 | 5.13E-15 | -2.63127 | 1 | 1 KRTAP4-16P       | -      |
| ENSG00000241243 | 5.13E-15 | -2.63127 | 1 | 1 RN7SL629P        | -      |
| ENSG00000241244 | 5.13E-15 | -2.63127 | 1 | 1 IGKV1D-16        | -      |
| ENSG00000241246 | 5.13E-15 | -2.63127 | 1 | 1 RN7SL302P        | -      |
| ENSG00000241248 | 5.13E-15 | -2.63127 | 1 | 1 RN7SL727P        | -      |
| ENSG00000241250 | 5.13E-15 | -2.63127 | 1 | 1 RPL17P20         | K02880 |
| ENSG00000241251 | 5.13E-15 | -2.63127 | 1 | 1 RP11-73B8.1      | K02889 |
| ENSG00000241254 | 5.13E-15 | -2.63127 | 1 | 1 AC092669.2       | -      |
| ENSG00000241257 | 5.13E-15 | -2.63127 | 1 | 1 RP11-397K18.1    | K02920 |
| ENSG00000241261 | 5.13E-15 | -2.63127 | 1 | 1 RPL17P19         | -      |
| ENSG00000241266 | 5.13E-15 | -2.63127 | 1 | 1 RN7SL82P         | -      |
| ENSG00000241273 | 5.13E-15 | -2.63127 | 1 | 1 RN7SL238P        | -      |
| ENSG00000241280 | 5.13E-15 | -2.63127 | 1 | 1 RP11-221J22.2    | -      |
| ENSG00000241281 | 5.13E-15 | -2.63127 | 1 | 1 RP11-364M6.1     | K02910 |
| ENSG00000241282 | 5.13E-15 | -2.63127 | 1 | 1 RPL34P33         | K02915 |
| ENSG00000241286 | 5.13E-15 | -2.63127 | 1 | 1 RPL29P25         | K02905 |
| ENSG00000241287 | 5.13E-15 | -2.63127 | 1 | 1 XXbac-BPG254F23. | -      |
| ENSG00000241291 | 5.13E-15 | -2.63127 | 1 | 1 RN7SL791P        | -      |
| ENSG00000241294 | 5.13E-15 | -2.63127 | 1 | 1 IGKV2-24         | -      |
| ENSG00000241295 | 5.13E-15 | -2.63127 | 1 | 1 ZBTB20-AS2       | -      |
| ENSG00000241305 | 5.13E-15 | -2.63127 | 1 | 1 ACTG1P13         | -      |
| ENSG00000241307 | 5.13E-15 | -2.63127 | 1 | 1 RP11-674E16.1    | -      |
| ENSG00000241317 | 5.13E-15 | -2.63127 | 1 | 1 RP11-342M3.1     | -      |
| ENSG00000241318 | 5.13E-15 | -2.63127 | 1 | 1 RP11-47K11.2     | K14962 |
| ENSG00000241319 | 5.13E-15 | -2.63127 | 1 | 1 SETP6            | K11290 |
| ENSG00000241324 | 5.13E-15 | -2.63127 | 1 | 1 RP5-921G16.2     | -      |
| ENSG00000241326 | 5.13E-15 | -2.63127 | 1 | 1 RP11-807G9.2     | -      |
| ENSG00000241328 | 5.13E-15 | -2.63127 | 1 | 1 RP11-331K15.1    | -      |
| ENSG00000241333 | 5.13E-15 | -2.63127 | 1 | 1 RN7SL385P        | -      |
| ENSG00000241334 | 5.13E-15 | -2.63127 | 1 | 1 RPL35AP33        | K02917 |
| ENSG00000241336 | 5.13E-15 | -2.63127 | 1 | 1 RP11-451G4.1     | -      |

|                 |          |          |   |                  |        |
|-----------------|----------|----------|---|------------------|--------|
| ENSG00000241341 | 5.13E-15 | -2.63127 | 1 | 1 RP11-395E19.2  | -      |
| ENSG00000241344 | 5.13E-15 | -2.63127 | 1 | 1 RPL21P47       | -      |
| ENSG00000241345 | 5.13E-15 | -2.63127 | 1 | 1 RP4-630C24.3   | -      |
| ENSG00000241346 | 5.13E-15 | -2.63127 | 1 | 1 RP11-379B18.3  | K11095 |
| ENSG00000241347 | 5.13E-15 | -2.63127 | 1 | 1 RN7SL466P      | -      |
| ENSG00000241350 | 5.13E-15 | -2.63127 | 1 | 1 PMS2P11        | K10858 |
| ENSG00000241351 | 5.13E-15 | -2.63127 | 1 | 1 IGKV3-11       | -      |
| ENSG00000241353 | 5.13E-15 | -2.63127 | 1 | 1 PPP1R2P4       | K16833 |
| ENSG00000241354 | 5.13E-15 | -2.63127 | 1 | 1 RP11-1042B17.2 | K02957 |
| ENSG00000241356 | 5.13E-15 | -2.63127 | 1 | 1 OR5G3          | K04257 |
| ENSG00000241357 | 5.13E-15 | -2.63127 | 1 | 1 RP11-758P17.2  | -      |
| ENSG00000241358 | 5.13E-15 | -2.63127 | 1 | 1 RP11-758I14.3  | -      |
| ENSG00000241359 | 5.13E-15 | -2.63127 | 1 | 1 SYNPR-AS1      | -      |
| ENSG00000241367 | 5.13E-15 | -2.63127 | 1 | 1 RPL7AP23       | K02936 |
| ENSG00000241370 | 5.13E-15 | -2.63127 | 1 | 1 RPP21          | K03540 |
| ENSG00000241383 | 5.13E-15 | -2.63127 | 1 | 1 RP11-152C17.1  | -      |
| ENSG00000241385 | 5.13E-15 | -2.63127 | 1 | 1 RP11-25D10.1   | K02883 |
| ENSG00000241388 | 5.13E-15 | -2.63127 | 1 | 1 HNF1A-AS1      | -      |
| ENSG00000241391 | 5.13E-15 | -2.63127 | 1 | 1 RN7SL234P      | -      |
| ENSG00000241392 | 5.13E-15 | -2.63127 | 1 | 1 RN7SL205P      | -      |
| ENSG00000241395 | 5.13E-15 | -2.63127 | 1 | 1 RN7SL344P      | -      |
| ENSG00000241397 | 5.13E-15 | -2.63127 | 1 | 1 LINC00903      | -      |
| ENSG00000241399 | 5.13E-15 | -2.63127 | 1 | 1 CD302          | K06722 |
| ENSG00000241400 | 5.13E-15 | -2.63127 | 1 | 1 RP11-764I5.1   | -      |
| ENSG00000241404 | 5.13E-15 | -2.63127 | 1 | 1 EGFL8          | K01074 |
| ENSG00000241406 | 5.13E-15 | -2.63127 | 1 | 1 RN7SL515P      | -      |
| ENSG00000241409 | 5.13E-15 | -2.63127 | 1 | 1 AC064852.4     | -      |
| ENSG00000241411 | 5.13E-15 | -2.63127 | 1 | 1 RP11-192C21.1  | K02981 |
| ENSG00000241420 | 5.13E-15 | -2.63127 | 1 | 1 RN7SL505P      | -      |
| ENSG00000241423 | 5.13E-15 | -2.63127 | 1 | 1 RPL21P103      | K02889 |
| ENSG00000241429 | 5.13E-15 | -2.63127 | 1 | 1 EEF1A1P25      | K03231 |
| ENSG00000241431 | 5.13E-15 | -2.63127 | 1 | 1 RP11-17A4.1    | K02922 |
| ENSG00000241434 | 5.13E-15 | -2.63127 | 1 | 1 CTD-2224J9.4   | K02924 |
| ENSG00000241438 | 5.13E-15 | -2.63127 | 1 | 1 TDGF1P6        | -      |
| ENSG00000241439 | 5.13E-15 | -2.63127 | 1 | 1 RP11-666A20.3  | -      |
| ENSG00000241449 | 5.13E-15 | -2.63127 | 1 | 1 RP11-545G3.1   | -      |
| ENSG00000241451 | 5.13E-15 | -2.63127 | 1 | 1 RPS27P22       | K02978 |
| ENSG00000241457 | 5.13E-15 | -2.63127 | 1 | 1 PLSCR5-AS1     | -      |
| ENSG00000241459 | 5.13E-15 | -2.63127 | 1 | 1 RN7SL185P      | -      |
| ENSG00000241461 | 5.13E-15 | -2.63127 | 1 | 1 RN7SL182P      | -      |
| ENSG00000241462 | 5.13E-15 | -2.63127 | 1 | 1 RP11-579O24.1  | K02951 |
| ENSG00000241465 | 5.13E-15 | -2.63127 | 1 | 1 GAGE12I        | -      |
| ENSG00000241469 | 5.13E-15 | -2.63127 | 1 | 1 LINC00635      | -      |
| ENSG00000241472 | 5.13E-15 | -2.63127 | 1 | 1 PTPRG-AS1      | -      |
| ENSG00000241473 | 5.13E-15 | -2.63127 | 1 | 1 RP11-259P15.3  | K05692 |
| ENSG00000241478 | 5.13E-15 | -2.63127 | 1 | 1 HSPA8P9        | K03283 |
| ENSG00000241479 | 5.13E-15 | -2.63127 | 1 | 1 RP11-641D5.2   | -      |
| ENSG00000241481 | 5.13E-15 | -2.63127 | 1 | 1 AC159540.2     | -      |
| ENSG00000241487 | 5.13E-15 | -2.63127 | 1 | 1 RN7SL586P      | -      |
| ENSG00000241490 | 5.13E-15 | -2.63127 | 1 | 1 RP11-553L6.2   | -      |
| ENSG00000241493 | 5.13E-15 | -2.63127 | 1 | 1 RP11-274B21.5  | K14568 |
| ENSG00000241499 | 5.13E-15 | -2.63127 | 1 | 1 RP11-85G20.2   | K02929 |
| ENSG00000241500 | 5.13E-15 | -2.63127 | 1 | 1 RN7SL256P      | -      |
| ENSG00000241505 | 5.13E-15 | -2.63127 | 1 | 1 RP11-161I10.1  | -      |
| ENSG00000241511 | 5.13E-15 | -2.63127 | 1 | 1 RPS15AP24      | K02957 |
| ENSG00000241524 | 5.13E-15 | -2.63127 | 1 | 1 RN7SL632P      | -      |
| ENSG00000241525 | 5.13E-15 | -2.63127 | 1 | 1 AC108004.3     | -      |
| ENSG00000241526 | 5.13E-15 | -2.63127 | 1 | 1 RP11-144C9.1   | K00134 |

|                 |          |          |   |                 |        |
|-----------------|----------|----------|---|-----------------|--------|
| ENSG00000241529 | 5.13E-15 | -2.63127 | 1 | 1 RN7SL767P     | -      |
| ENSG00000241532 | 5.13E-15 | -2.63127 | 1 | 1 AGGF1P3       | -      |
| ENSG00000241536 | 5.13E-15 | -2.63127 | 1 | 1 RP11-381G8.1  | K03094 |
| ENSG00000241537 | 5.13E-15 | -2.63127 | 1 | 1 RP11-624D20.1 | K12842 |
| ENSG00000241539 | 5.13E-15 | -2.63127 | 1 | 1 RP11-740N7.4  | -      |
| ENSG00000241542 | 5.13E-15 | -2.63127 | 1 | 1 RN7SL369P     | -      |
| ENSG00000241546 | 5.13E-15 | -2.63127 | 1 | 1 RP11-767L7.2  | K00861 |
| ENSG00000241550 | 5.13E-15 | -2.63127 | 1 | 1 RN7SL41P      | -      |
| ENSG00000241552 | 5.13E-15 | -2.63127 | 1 | 1 RN7SL58P      | -      |
| ENSG00000241560 | 5.13E-15 | -2.63127 | 1 | 1 ZBTB20-AS1    | -      |
| ENSG00000241562 | 5.13E-15 | -2.63127 | 1 | 1 RPL7P5        | K02937 |
| ENSG00000241566 | 5.13E-15 | -2.63127 | 1 | 1 IGKV2D-24     | -      |
| ENSG00000241571 | 5.13E-15 | -2.63127 | 1 | 1 ATP5A1P7      | K02132 |
| ENSG00000241572 | 5.13E-15 | -2.63127 | 1 | 1 PRICKLE2-AS1  | -      |
| ENSG00000241573 | 5.13E-15 | -2.63127 | 1 | 1 RP11-286H14.1 | K09228 |
| ENSG00000241577 | 5.13E-15 | -2.63127 | 1 | 1 RP11-523O18.7 | -      |
| ENSG00000241582 | 5.13E-15 | -2.63127 | 1 | 1 RP11-434O22.2 | K02893 |
| ENSG00000241587 | 5.13E-15 | -2.63127 | 1 | 1 RN7SL482P     | -      |
| ENSG00000241588 | 5.13E-15 | -2.63127 | 1 | 1 RN7SL484P     | -      |
| ENSG00000241590 | 5.13E-15 | -2.63127 | 1 | 1 RPL17P37      | K02880 |
| ENSG00000241592 | 5.13E-15 | -2.63127 | 1 | 1 RP11-372E1.7  | -      |
| ENSG00000241595 | 5.13E-15 | -2.63127 | 1 | 1 KRTAP9-4      | -      |
| ENSG00000241596 | 5.13E-15 | -2.63127 | 1 | 1 RP11-326J18.1 | -      |
| ENSG00000241597 | 5.13E-15 | -2.63127 | 1 | 1 CTD-2007H13.1 | -      |
| ENSG00000241598 | 5.13E-15 | -2.63127 | 1 | 1 KRTAP5-4      | -      |
| ENSG00000241599 | 5.13E-15 | -2.63127 | 1 | 1 RP11-34P13.9  | -      |
| ENSG00000241604 | 5.13E-15 | -2.63127 | 1 | 1 RN7SL340P     | -      |
| ENSG00000241607 | 5.13E-15 | -2.63127 | 1 | 1 RP11-357K9.2  | K00522 |
| ENSG00000241612 | 5.13E-15 | -2.63127 | 1 | 1 RP13-585F24.1 | K02889 |
| ENSG00000241613 | 5.13E-15 | -2.63127 | 1 | 1 RN7SL618P     | -      |
| ENSG00000241621 | 5.13E-15 | -2.63127 | 1 | 1 GOLGA2P6      | K10595 |
| ENSG00000241622 | 5.13E-15 | -2.63127 | 1 | 1 RARRES2P1     | K10044 |
| ENSG00000241625 | 5.13E-15 | -2.63127 | 1 | 1 RN7SL18P      | -      |
| ENSG00000241636 | 5.13E-15 | -2.63127 | 1 | 1 RP11-71H9.2   | -      |
| ENSG00000241640 | 5.13E-15 | -2.63127 | 1 | 1 RP11-59H7.1   | K02889 |
| ENSG00000241644 | 5.13E-15 | -2.63127 | 1 | 1 INMT          | K00562 |
| ENSG00000241648 | 5.13E-15 | -2.63127 | 1 | 1 CADM2-AS2     | -      |
| ENSG00000241651 | 5.13E-15 | -2.63127 | 1 | 1 RP11-214O14.1 | K02877 |
| ENSG00000241652 | 5.13E-15 | -2.63127 | 1 | 1 RN7SL253P     | -      |
| ENSG00000241654 | 5.13E-15 | -2.63127 | 1 | 1 RPL19P18      | K02885 |
| ENSG00000241656 | 5.13E-15 | -2.63127 | 1 | 1 UBA52P7       | K02927 |
| ENSG00000241657 | 5.13E-15 | -2.63127 | 1 | 1 TRBV11-2      | -      |
| ENSG00000241661 | 5.13E-15 | -2.63127 | 1 | 1 PPP1R2P6      | K16833 |
| ENSG00000241665 | 5.13E-15 | -2.63127 | 1 | 1 RN7SL418P     | -      |
| ENSG00000241666 | 5.13E-15 | -2.63127 | 1 | 1 RP3-455J7.4   | -      |
| ENSG00000241667 | 5.13E-15 | -2.63127 | 1 | 1 RP11-444P10.1 | -      |
| ENSG00000241668 | 5.13E-15 | -2.63127 | 1 | 1 RPL19P11      | K02885 |
| ENSG00000241669 | 5.13E-15 | -2.63127 | 1 | 1 RP11-576M8.2  | -      |
| ENSG00000241670 | 5.13E-15 | -2.63127 | 1 | 1 AP006222.1    | K02893 |
| ENSG00000241673 | 5.13E-15 | -2.63127 | 1 | 1 RPS27P12      | K02978 |
| ENSG00000241678 | 5.13E-15 | -2.63127 | 1 | 1 RP11-732A19.1 | K02889 |
| ENSG00000241679 | 5.13E-15 | -2.63127 | 1 | 1 RP11-80H8.4   | -      |
| ENSG00000241680 | 5.13E-15 | -2.63127 | 1 | 1 RPL31P49      | K02910 |
| ENSG00000241684 | 5.13E-15 | -2.63127 | 1 | 1 ADAMTS9-AS2   | -      |
| ENSG00000241690 | 5.13E-15 | -2.63127 | 1 | 1 TMMEM239      | -      |
| ENSG00000241693 | 5.13E-15 | -2.63127 | 1 | 1 RN7SL704P     | -      |
| ENSG00000241695 | 5.13E-15 | -2.63127 | 1 | 1 GM2AP1        | K12383 |
| ENSG00000241696 | 5.13E-15 | -2.63127 | 1 | 1 RP11-420J11.2 | -      |



|                 |          |          |   |                 |        |
|-----------------|----------|----------|---|-----------------|--------|
| ENSG00000241697 | 5.13E-15 | -2.63127 | 1 | 1 TMEFF1        | -      |
| ENSG00000241708 | 5.13E-15 | -2.63127 | 1 | 1 RN7SL129P     | -      |
| ENSG00000241709 | 5.13E-15 | -2.63127 | 1 | 1 RN7SL265P     | -      |
| ENSG00000241710 | 5.13E-15 | -2.63127 | 1 | 1 RN7SL10P      | -      |
| ENSG00000241717 | 5.13E-15 | -2.63127 | 1 | 1 VWFP1         | K03900 |
| ENSG00000241721 | 5.13E-15 | -2.63127 | 1 | 1 SUMO1P1       | K12160 |
| ENSG00000241722 | 5.13E-15 | -2.63127 | 1 | 1 RP11-255I10.1 | K02929 |
| ENSG00000241723 | 5.13E-15 | -2.63127 | 1 | 1 RP11-113A11.1 | K02877 |
| ENSG00000241728 | 5.13E-15 | -2.63127 | 1 | 1 AP001062.8    | -      |
| ENSG00000241732 | 5.13E-15 | -2.63127 | 1 | 1 RP11-38P22.2  | -      |
| ENSG00000241737 | 5.13E-15 | -2.63127 | 1 | 1 FAM90A23P     | -      |
| ENSG00000241739 | 5.13E-15 | -2.63127 | 1 | 1 CTD-2290C23.2 | K02889 |
| ENSG00000241743 | 5.13E-15 | -2.63127 | 1 | 1 RP5-964N17.1  | -      |
| ENSG00000241744 | 5.13E-15 | -2.63127 | 1 | 1 RP11-399D15.1 | K02991 |
| ENSG00000241746 | 5.13E-15 | -2.63127 | 1 | 1 RP11-941H19.1 | K02872 |
| ENSG00000241749 | 5.13E-15 | -2.63127 | 1 | 1 RPSAP52       | K02998 |
| ENSG00000241754 | 5.13E-15 | -2.63127 | 1 | 1 RP11-280H21.1 | -      |
| ENSG00000241755 | 5.13E-15 | -2.63127 | 1 | 1 IGKV1-9       | -      |
| ENSG00000241756 | 5.13E-15 | -2.63127 | 1 | 1 RN7SL83P      | -      |
| ENSG00000241757 | 5.13E-15 | -2.63127 | 1 | 1 RN7SL714P     | -      |
| ENSG00000241767 | 5.13E-15 | -2.63127 | 1 | 1 RP11-71H9.1   | -      |
| ENSG00000241774 | 5.13E-15 | -2.63127 | 1 | 1 RN7SL438P     | -      |
| ENSG00000241776 | 5.13E-15 | -2.63127 | 1 | 1 RP11-651J20.1 | -      |
| ENSG00000241777 | 5.13E-15 | -2.63127 | 1 | 1 RP11-148O7.2  | -      |
| ENSG00000241778 | 5.13E-15 | -2.63127 | 1 | 1 AC005077.9    | -      |
| ENSG00000241785 | 5.13E-15 | -2.63127 | 1 | 1 RN7SL390P     | -      |
| ENSG00000241787 | 5.13E-15 | -2.63127 | 1 | 1 MTND4P16      | -      |
| ENSG00000241788 | 5.13E-15 | -2.63127 | 1 | 1 COX6B1P2      | -      |
| ENSG00000241789 | 5.13E-15 | -2.63127 | 1 | 1 RN7SL504P     | -      |
| ENSG00000241790 | 5.13E-15 | -2.63127 | 1 | 1 ENO1P4        | K01689 |
| ENSG00000241791 | 5.13E-15 | -2.63127 | 1 | 1 RN7SL817P     | -      |
| ENSG00000241792 | 5.13E-15 | -2.63127 | 1 | 1 RP11-501O2.1  | -      |
| ENSG00000241794 | 5.13E-15 | -2.63127 | 1 | 1 SPRR2A        | -      |
| ENSG00000241804 | 5.13E-15 | -2.63127 | 1 | 1 RP11-719N22.1 | -      |
| ENSG00000241807 | 5.13E-15 | -2.63127 | 1 | 1 RN7SL319P     | -      |
| ENSG00000241808 | 5.13E-15 | -2.63127 | 1 | 1 RPS15AP34     | -      |
| ENSG00000241809 | 5.13E-15 | -2.63127 | 1 | 1 CTD-2207L17.1 | K02880 |
| ENSG00000241810 | 5.13E-15 | -2.63127 | 1 | 1 HMGN2P13      | K11300 |
| ENSG00000241815 | 5.13E-15 | -2.63127 | 1 | 1 RP11-124D9.1  | K10752 |
| ENSG00000241821 | 5.13E-15 | -2.63127 | 1 | 1 RN7SL170P     | -      |
| ENSG00000241825 | 5.13E-15 | -2.63127 | 1 | 1 RPL7P42       | K02937 |
| ENSG00000241828 | 5.13E-15 | -2.63127 | 1 | 1 RP11-277J24.1 | -      |
| ENSG00000241829 | 5.13E-15 | -2.63127 | 1 | 1 RPL21P54      | K02889 |
| ENSG00000241832 | 5.13E-15 | -2.63127 | 1 | 1 CECR3         | -      |
| ENSG00000241834 | 5.13E-15 | -2.63127 | 1 | 1 RN7SL149P     | -      |
| ENSG00000241838 | 5.13E-15 | -2.63127 | 1 | 1 LA16c-3G11.7  | K17299 |
| ENSG00000241840 | 5.13E-15 | -2.63127 | 1 | 1 RN7SL194P     | -      |
| ENSG00000241846 | 5.13E-15 | -2.63127 | 1 | 1 RP11-318G8.1  | K02924 |
| ENSG00000241847 | 5.13E-15 | -2.63127 | 1 | 1 VDACP8        | K05862 |
| ENSG00000241850 | 5.13E-15 | -2.63127 | 1 | 1 GSTTP1        | K00799 |
| ENSG00000241853 | 5.13E-15 | -2.63127 | 1 | 1 RP11-147K6.1  | K02910 |
| ENSG00000241859 | 5.13E-15 | -2.63127 | 1 | 1 KALP          | -      |
| ENSG00000241860 | 5.13E-15 | -2.63127 | 1 | 1 RP11-34P13.13 | -      |
| ENSG00000241861 | 5.13E-15 | -2.63127 | 1 | 1 GAPDHP50      | -      |
| ENSG00000241866 | 5.13E-15 | -2.63127 | 1 | 1 RN7SL401P     | -      |
| ENSG00000241868 | 5.13E-15 | -2.63127 | 1 | 1 RN7SL434P     | -      |
| ENSG00000241869 | 5.13E-15 | -2.63127 | 1 | 1 RN7SL363P     | -      |
| ENSG00000241870 | 5.13E-15 | -2.63127 | 1 | 1 CTB-14A14.1   | -      |

|                 |          |          |   |                  |        |
|-----------------|----------|----------|---|------------------|--------|
| ENSG00000241874 | 5.13E-15 | -2.63127 | 1 | 1 TOMM22P6       | -      |
| ENSG00000241877 | 5.13E-15 | -2.63127 | 1 | 1 RP11-84H6.1    | K02885 |
| ENSG00000241881 | 5.13E-15 | -2.63127 | 1 | 1 U66059.58      | -      |
| ENSG00000241882 | 5.13E-15 | -2.63127 | 1 | 1 RP11-637O11.2  | -      |
| ENSG00000241884 | 5.13E-15 | -2.63127 | 1 | 1 RP11-85I21.1   | -      |
| ENSG00000241886 | 5.13E-15 | -2.63127 | 1 | 1 RP11-242C19.2  | -      |
| ENSG00000241888 | 5.13E-15 | -2.63127 | 1 | 1 RPSAP37        | K02998 |
| ENSG00000241891 | 5.13E-15 | -2.63127 | 1 | 1 RP11-226P1.1   | -      |
| ENSG00000241899 | 5.13E-15 | -2.63127 | 1 | 1 TPT1P3         | -      |
| ENSG00000241905 | 5.13E-15 | -2.63127 | 1 | 1 RP11-305O4.1   | -      |
| ENSG00000241907 | 5.13E-15 | -2.63127 | 1 | 1 RPS20P4        | K02969 |
| ENSG00000241911 | 5.13E-15 | -2.63127 | 1 | 1 TRBVB          | -      |
| ENSG00000241912 | 5.13E-15 | -2.63127 | 1 | 1 RP11-292E2.2   | -      |
| ENSG00000241913 | 5.13E-15 | -2.63127 | 1 | 1 RP5-1073F15.1  | -      |
| ENSG00000241917 | 5.13E-15 | -2.63127 | 1 | 1 RP11-512N21.1  | -      |
| ENSG00000241921 | 5.13E-15 | -2.63127 | 1 | 1 AC000370.2     | -      |
| ENSG00000241923 | 5.13E-15 | -2.63127 | 1 | 1 RP11-425I13.1  | K02875 |
| ENSG00000241926 | 5.13E-15 | -2.63127 | 1 | 1 RP5-1154E9.7   | -      |
| ENSG00000241929 | 5.13E-15 | -2.63127 | 1 | 1 RP11-278L15.3  | -      |
| ENSG00000241932 | 5.13E-15 | -2.63127 | 1 | 1 RP11-14K2.1    | K02917 |
| ENSG00000241939 | 5.13E-15 | -2.63127 | 1 | 1 RN7SL517P      | -      |
| ENSG00000241941 | 5.13E-15 | -2.63127 | 1 | 1 RPL32P26       | K02912 |
| ENSG00000241942 | 5.13E-15 | -2.63127 | 1 | 1 RPS20P20       | -      |
| ENSG00000241943 | 5.13E-15 | -2.63127 | 1 | 1 RN7SL188P      | -      |
| ENSG00000241946 | 5.13E-15 | -2.63127 | 1 | 1 RP11-496B10.1  | K11877 |
| ENSG00000241950 | 5.13E-15 | -2.63127 | 1 | 1 RPL29P23       | K02905 |
| ENSG00000241956 | 5.13E-15 | -2.63127 | 1 | 1 CTC-340A15.2   | -      |
| ENSG00000241961 | 5.13E-15 | -2.63127 | 1 | 1 RP11-7F18.1    | K02880 |
| ENSG00000241963 | 5.13E-15 | -2.63127 | 1 | 1 RN7SL655P      | -      |
| ENSG00000241964 | 5.13E-15 | -2.63127 | 1 | 1 RN7SL135P      | -      |
| ENSG00000241965 | 5.13E-15 | -2.63127 | 1 | 1 RPS2P25        | -      |
| ENSG00000241981 | 5.13E-15 | -2.63127 | 1 | 1 AF224669.3     | K02889 |
| ENSG00000241983 | 5.13E-15 | -2.63127 | 1 | 1 RN7SL566P      | -      |
| ENSG00000241984 | 5.13E-15 | -2.63127 | 1 | 1 RPL7AP2        | K02936 |
| ENSG00000241985 | 5.13E-15 | -2.63127 | 1 | 1 WWTR1-IT1      | -      |
| ENSG00000241992 | 5.13E-15 | -2.63127 | 1 | 1 RN7SL831P      | -      |
| ENSG00000241993 | 5.13E-15 | -2.63127 | 1 | 1 RPL38P1        | K02923 |
| ENSG00000241997 | 5.13E-15 | -2.63127 | 1 | 1 RN7SL323P      | -      |
| ENSG00000242001 | 5.13E-15 | -2.63127 | 1 | 1 GS1-388B5.1    | K00907 |
| ENSG00000242009 | 5.13E-15 | -2.63127 | 1 | 1 RP11-359D24.1  | -      |
| ENSG00000242012 | 5.13E-15 | -2.63127 | 1 | 1 RP11-338L18.1  | -      |
| ENSG00000242013 | 5.13E-15 | -2.63127 | 1 | 1 USP27X         | K11366 |
| ENSG00000242014 | 5.13E-15 | -2.63127 | 1 | 1 RN7SL26P       | -      |
| ENSG00000242019 | 5.13E-15 | -2.63127 | 1 | 1 KIR3DL3        | K07980 |
| ENSG00000242020 | 5.13E-15 | -2.63127 | 1 | 1 RN7SL68P       | -      |
| ENSG00000242021 | 5.13E-15 | -2.63127 | 1 | 1 RP11-268G12.3  | -      |
| ENSG00000242029 | 5.13E-15 | -2.63127 | 1 | 1 RP11-457K10.1  | -      |
| ENSG00000242034 | 5.13E-15 | -2.63127 | 1 | 1 RP11-1396O13.1 | K02974 |
| ENSG00000242036 | 5.13E-15 | -2.63127 | 1 | 1 RP11-603B13.1  | K08738 |
| ENSG00000242037 | 5.13E-15 | -2.63127 | 1 | 1 RN7SL585P      | -      |
| ENSG00000242041 | 5.13E-15 | -2.63127 | 1 | 1 RP11-70F11.2   | K02917 |
| ENSG00000242042 | 5.13E-15 | -2.63127 | 1 | 1 RP11-690C23.2  | -      |
| ENSG00000242048 | 5.13E-15 | -2.63127 | 1 | 1 RP13-452N2.1   | -      |
| ENSG00000242049 | 5.13E-15 | -2.63127 | 1 | 1 DNAJB8-AS1     | -      |
| ENSG00000242052 | 5.13E-15 | -2.63127 | 1 | 1 RP11-190C22.1  | K02866 |
| ENSG00000242060 | 5.13E-15 | -2.63127 | 1 | 1 RPS3AP49       | K02984 |
| ENSG00000242061 | 5.13E-15 | -2.63127 | 1 | 1 CTD-2555K7.1   | K02898 |
| ENSG00000242062 | 5.13E-15 | -2.63127 | 1 | 1 MARK2P6        | -      |

|                 |          |          |   |                 |        |
|-----------------|----------|----------|---|-----------------|--------|
| ENSG00000242065 | 5.13E-15 | -2.63127 | 1 | 1 RN7SL291P     | -      |
| ENSG00000242066 | 5.13E-15 | -2.63127 | 1 | 1 RN7SL214P     | -      |
| ENSG00000242067 | 5.13E-15 | -2.63127 | 1 | 1 RPL9P28       | K02940 |
| ENSG00000242068 | 5.13E-15 | -2.63127 | 1 | 1 RP11-259P15.4 | K15692 |
| ENSG00000242070 | 5.13E-15 | -2.63127 | 1 | 1 NPM1P17       | K11276 |
| ENSG00000242072 | 5.13E-15 | -2.63127 | 1 | 1 RP11-458K10.1 | -      |
| ENSG00000242073 | 5.13E-15 | -2.63127 | 1 | 1 AC006014.7    | K09228 |
| ENSG00000242076 | 5.13E-15 | -2.63127 | 1 | 1 IGKV1-33      | -      |
| ENSG00000242079 | 5.13E-15 | -2.63127 | 1 | 1 RN7SL318P     | -      |
| ENSG00000242080 | 5.13E-15 | -2.63127 | 1 | 1 CTC-550M4.1   | K02929 |
| ENSG00000242082 | 5.13E-15 | -2.63127 | 1 | 1 RP1-90G24.10  | -      |
| ENSG00000242085 | 5.13E-15 | -2.63127 | 1 | 1 RPS20P33      | -      |
| ENSG00000242087 | 5.13E-15 | -2.63127 | 1 | 1 RPL36AP41     | K02929 |
| ENSG00000242088 | 5.13E-15 | -2.63127 | 1 | 1 AC090602.2    | K02978 |
| ENSG00000242097 | 5.13E-15 | -2.63127 | 1 | 1 RP11-64D22.1  | K00710 |
| ENSG00000242100 | 5.13E-15 | -2.63127 | 1 | 1 RPL9P32       | K02940 |
| ENSG00000242101 | 5.13E-15 | -2.63127 | 1 | 1 RN7SL416P     | -      |
| ENSG00000242102 | 5.13E-15 | -2.63127 | 1 | 1 RN7SL152P     | -      |
| ENSG00000242103 | 5.13E-15 | -2.63127 | 1 | 1 RP11-10G15.4  | -      |
| ENSG00000242107 | 5.13E-15 | -2.63127 | 1 | 1 LINC01100     | -      |
| ENSG00000242109 | 5.13E-15 | -2.63127 | 1 | 1 NPM1P23       | K11276 |
| ENSG00000242111 | 5.13E-15 | -2.63127 | 1 | 1 RP11-86L19.2  | -      |
| ENSG00000242113 | 5.13E-15 | -2.63127 | 1 | 1 RN7SL124P     | -      |
| ENSG00000242115 | 5.13E-15 | -2.63127 | 1 | 1 PRSS3P3       | K01312 |
| ENSG00000242118 | 5.13E-15 | -2.63127 | 1 | 1 RN7SL201P     | -      |
| ENSG00000242119 | 5.13E-15 | -2.63127 | 1 | 1 RP11-312P21.2 | -      |
| ENSG00000242120 | 5.13E-15 | -2.63127 | 1 | 1 RP11-231I13.2 | -      |
| ENSG00000242121 | 5.13E-15 | -2.63127 | 1 | 1 RN7SL267P     | -      |
| ENSG00000242123 | 5.13E-15 | -2.63127 | 1 | 1 RP11-51L5.1   | K02929 |
| ENSG00000242134 | 5.13E-15 | -2.63127 | 1 | 1 RPL5P13       | -      |
| ENSG00000242135 | 5.13E-15 | -2.63127 | 1 | 1 RPL17P2       | K02880 |
| ENSG00000242136 | 5.13E-15 | -2.63127 | 1 | 1 RP11-734K21.2 | -      |
| ENSG00000242137 | 5.13E-15 | -2.63127 | 1 | 1 RPL11P5       | K02868 |
| ENSG00000242140 | 5.13E-15 | -2.63127 | 1 | 1 RP11-262M14.2 | K13213 |
| ENSG00000242142 | 5.13E-15 | -2.63127 | 1 | 1 SERBP1P3      | K13199 |
| ENSG00000242145 | 5.13E-15 | -2.63127 | 1 | 1 RP11-520D19.1 | -      |
| ENSG00000242150 | 5.13E-15 | -2.63127 | 1 | 1 RP11-134G8.6  | K02947 |
| ENSG00000242151 | 5.13E-15 | -2.63127 | 1 | 1 CTD-2501O3.3  | K10418 |
| ENSG00000242152 | 5.13E-15 | -2.63127 | 1 | 1 RP11-639F1.3  | -      |
| ENSG00000242153 | 5.13E-15 | -2.63127 | 1 | 1 OFD1P6Y       | K16480 |
| ENSG00000242156 | 5.13E-15 | -2.63127 | 1 | 1 AC000041.8    | K12392 |
| ENSG00000242158 | 5.13E-15 | -2.63127 | 1 | 1 RN7SL361P     | -      |
| ENSG00000242159 | 5.13E-15 | -2.63127 | 1 | 1 ABCF2P1       | K06185 |
| ENSG00000242162 | 5.13E-15 | -2.63127 | 1 | 1 RP11-128A6.3  | K10956 |
| ENSG00000242163 | 5.13E-15 | -2.63127 | 1 | 1 RP11-299L17.1 | K02974 |
| ENSG00000242165 | 5.13E-15 | -2.63127 | 1 | 1 RN7SL222P     | -      |
| ENSG00000242169 | 5.13E-15 | -2.63127 | 1 | 1 RP11-219G10.1 | K02936 |
| ENSG00000242170 | 5.13E-15 | -2.63127 | 1 | 1 RN7SL329P     | -      |
| ENSG00000242175 | 5.13E-15 | -2.63127 | 1 | 1 RN7SL127P     | -      |
| ENSG00000242176 | 5.13E-15 | -2.63127 | 1 | 1 RPL39P31      | K02924 |
| ENSG00000242178 | 5.13E-15 | -2.63127 | 1 | 1 MTND4P17      | -      |
| ENSG00000242182 | 5.13E-15 | -2.63127 | 1 | 1 RN7SL745P     | -      |
| ENSG00000242185 | 5.13E-15 | -2.63127 | 1 | 1 CT45A2        | -      |
| ENSG00000242186 | 5.13E-15 | -2.63127 | 1 | 1 AC002523.1    | -      |
| ENSG00000242188 | 5.13E-15 | -2.63127 | 1 | 1 RN7SL428P     | -      |
| ENSG00000242190 | 5.13E-15 | -2.63127 | 1 | 1 RP11-142L1.1  | -      |
| ENSG00000242193 | 5.13E-15 | -2.63127 | 1 | 1 RP11-568K15.1 | -      |
| ENSG00000242195 | 5.13E-15 | -2.63127 | 1 | 1 SRRM1P2       | -      |

|                 |          |          |   |                 |        |
|-----------------|----------|----------|---|-----------------|--------|
| ENSG00000242197 | 5.13E-15 | -2.63127 | 1 | 1 RP11-588L15.1 | K02922 |
| ENSG00000242199 | 5.13E-15 | -2.63127 | 1 | 1 RP11-71H17.1  | -      |
| ENSG00000242201 | 5.13E-15 | -2.63127 | 1 | 1 RN7SL215P     | -      |
| ENSG00000242206 | 5.13E-15 | -2.63127 | 1 | 1 RPS26P35      | K02976 |
| ENSG00000242207 | 5.13E-15 | -2.63127 | 1 | 1 HOXB-AS4      | -      |
| ENSG00000242208 | 5.13E-15 | -2.63127 | 1 | 1 RPL5P29       | K02932 |
| ENSG00000242209 | 5.13E-15 | -2.63127 | 1 | 1 AC006445.6    | K02912 |
| ENSG00000242214 | 5.13E-15 | -2.63127 | 1 | 1 MTND3P6       | -      |
| ENSG00000242216 | 5.13E-15 | -2.63127 | 1 | 1 RN7SL97P      | -      |
| ENSG00000242222 | 5.13E-15 | -2.63127 | 1 | 1 RP11-237P21.1 | K00235 |
| ENSG00000242229 | 5.13E-15 | -2.63127 | 1 | 1 RPS3AP14      | K02984 |
| ENSG00000242236 | 5.13E-15 | -2.63127 | 1 | 1 RN7SL594P     | -      |
| ENSG00000242241 | 5.13E-15 | -2.63127 | 1 | 1 RN7SL306P     | -      |
| ENSG00000242242 | 5.13E-15 | -2.63127 | 1 | 1 PVRL3-AS1     | -      |
| ENSG00000242244 | 5.13E-15 | -2.63127 | 1 | 1 ATP5G1P3      | K02128 |
| ENSG00000242246 | 5.13E-15 | -2.63127 | 1 | 1 RP11-331O9.2  | -      |
| ENSG00000242248 | 5.13E-15 | -2.63127 | 1 | 1 RPL7AP57      | K02936 |
| ENSG00000242251 | 5.13E-15 | -2.63127 | 1 | 1 RN7SL20P      | -      |
| ENSG00000242255 | 5.13E-15 | -2.63127 | 1 | 1 RPL39P34      | K02924 |
| ENSG00000242256 | 5.13E-15 | -2.63127 | 1 | 1 RN7SL57P      | -      |
| ENSG00000242261 | 5.13E-15 | -2.63127 | 1 | 1 RP11-62J1.3   | -      |
| ENSG00000242262 | 5.13E-15 | -2.63127 | 1 | 1 RP11-100N21.1 | K02877 |
| ENSG00000242266 | 5.13E-15 | -2.63127 | 1 | 1 RN7SL456P     | -      |
| ENSG00000242268 | 5.13E-15 | -2.63127 | 1 | 1 RP11-368I23.2 | -      |
| ENSG00000242272 | 5.13E-15 | -2.63127 | 1 | 1 AK2P2         | K00939 |
| ENSG00000242276 | 5.13E-15 | -2.63127 | 1 | 1 RPL5P3        | K02932 |
| ENSG00000242278 | 5.13E-15 | -2.63127 | 1 | 1 RP11-382N13.1 | K02984 |
| ENSG00000242279 | 5.13E-15 | -2.63127 | 1 | 1 RP11-659G9.1  | K02936 |
| ENSG00000242280 | 5.13E-15 | -2.63127 | 1 | 1 SLC16A1P1     | K08179 |
| ENSG00000242281 | 5.13E-15 | -2.63127 | 1 | 1 RN7SL159P     | -      |
| ENSG00000242284 | 5.13E-15 | -2.63127 | 1 | 1 CT45A5        | -      |
| ENSG00000242285 | 5.13E-15 | -2.63127 | 1 | 1 RPL6P8        | K02934 |
| ENSG00000242290 | 5.13E-15 | -2.63127 | 1 | 1 RP11-197K3.1  | -      |
| ENSG00000242291 | 5.13E-15 | -2.63127 | 1 | 1 RPL36AP51     | K02929 |
| ENSG00000242292 | 5.13E-15 | -2.63127 | 1 | 1 CTD-2282P23.1 | K02924 |
| ENSG00000242293 | 5.13E-15 | -2.63127 | 1 | 1 RP11-226F19.1 | -      |
| ENSG00000242295 | 5.13E-15 | -2.63127 | 1 | 1 RP11-522B15.1 | K02910 |
| ENSG00000242296 | 5.13E-15 | -2.63127 | 1 | 1 DEFB109P1     | -      |
| ENSG00000242301 | 5.13E-15 | -2.63127 | 1 | 1 RP11-93P10.3  | K09571 |
| ENSG00000242307 | 5.13E-15 | -2.63127 | 1 | 1 RPS26P52      | K02976 |
| ENSG00000242308 | 5.13E-15 | -2.63127 | 1 | 1 RP11-572C15.3 | K00789 |
| ENSG00000242311 | 5.13E-15 | -2.63127 | 1 | 1 RN7SL21P      | -      |
| ENSG00000242314 | 5.13E-15 | -2.63127 | 1 | 1 RP11-428G5.2  | K02870 |
| ENSG00000242315 | 5.13E-15 | -2.63127 | 1 | 1 RN7SL685P     | -      |
| ENSG00000242317 | 5.13E-15 | -2.63127 | 1 | 1 RP11-875H7.5  | -      |
| ENSG00000242318 | 5.13E-15 | -2.63127 | 1 | 1 RP11-810D13.1 | -      |
| ENSG00000242320 | 5.13E-15 | -2.63127 | 1 | 1 RPL21P126     | K02889 |
| ENSG00000242321 | 5.13E-15 | -2.63127 | 1 | 1 RPL23AP40     | -      |
| ENSG00000242324 | 5.13E-15 | -2.63127 | 1 | 1 RP4-576H24.2  | K06551 |
| ENSG00000242326 | 5.13E-15 | -2.63127 | 1 | 1 RP11-12N13.2  | -      |
| ENSG00000242327 | 5.13E-15 | -2.63127 | 1 | 1 CTD-2184D3.1  | K02953 |
| ENSG00000242329 | 5.13E-15 | -2.63127 | 1 | 1 RP11-59H1.1   | K02921 |
| ENSG00000242330 | 5.13E-15 | -2.63127 | 1 | 1 RN7SL683P     | -      |
| ENSG00000242339 | 5.13E-15 | -2.63127 | 1 | 1 RP11-735B13.2 | -      |
| ENSG00000242341 | 5.13E-15 | -2.63127 | 1 | 1 RN7SL646P     | -      |
| ENSG00000242348 | 5.13E-15 | -2.63127 | 1 | 1 RN7SL561P     | -      |
| ENSG00000242352 | 5.13E-15 | -2.63127 | 1 | 1 RP11-403I13.6 | -      |
| ENSG00000242353 | 5.13E-15 | -2.63127 | 1 | 1 RP4-710M3.1   | K02870 |

|                 |          |          |   |                 |        |
|-----------------|----------|----------|---|-----------------|--------|
| ENSG00000242357 | 5.13E-15 | -2.63127 | 1 | 1 RP11-809C18.5 | -      |
| ENSG00000242358 | 5.13E-15 | -2.63127 | 1 | 1 RPS21P4       | K02971 |
| ENSG00000242360 | 5.13E-15 | -2.63127 | 1 | 1 RN7SL272P     | -      |
| ENSG00000242362 | 5.13E-15 | -2.63127 | 1 | 1 CT47A2        | -      |
| ENSG00000242364 | 5.13E-15 | -2.63127 | 1 | 1 RP11-451J24.1 | K11187 |
| ENSG00000242365 | 5.13E-15 | -2.63127 | 1 | 1 NDUFA5P5      | K03949 |
| ENSG00000242366 | 5.13E-15 | -2.63127 | 1 | 1 UGT1A1        | K00699 |
| ENSG00000242370 | 5.13E-15 | -2.63127 | 1 | 1 KCNAB1-AS1    | -      |
| ENSG00000242371 | 5.13E-15 | -2.63127 | 1 | 1 IGKV1-39      | -      |
| ENSG00000242379 | 5.13E-15 | -2.63127 | 1 | 1 RN7SL261P     | -      |
| ENSG00000242381 | 5.13E-15 | -2.63127 | 1 | 1 RN7SL741P     | -      |
| ENSG00000242384 | 5.13E-15 | -2.63127 | 1 | 1 TBC1D3H       | K11837 |
| ENSG00000242385 | 5.13E-15 | -2.63127 | 1 | 1 LINC00901     | -      |
| ENSG00000242387 | 5.13E-15 | -2.63127 | 1 | 1 HIST1H2APS2   | K12300 |
| ENSG00000242389 | 5.13E-15 | -2.63127 | 1 | 1 RBMY1E        | K12885 |
| ENSG00000242390 | 5.13E-15 | -2.63127 | 1 | 1 RPL6P9        | -      |
| ENSG00000242393 | 5.13E-15 | -2.63127 | 1 | 1 AC010141.4    | -      |
| ENSG00000242405 | 5.13E-15 | -2.63127 | 1 | 1 RP11-267J23.1 | K02889 |
| ENSG00000242407 | 5.13E-15 | -2.63127 | 1 | 1 CTD-2377D24.4 | -      |
| ENSG00000242411 | 5.13E-15 | -2.63127 | 1 | 1 CTD-2086L14.1 | K02873 |
| ENSG00000242417 | 5.13E-15 | -2.63127 | 1 | 1 RP11-286B5.1  | K02883 |
| ENSG00000242419 | 5.13E-15 | -2.63127 | 1 | 1 PCDHGC4       | K16497 |
| ENSG00000242421 | 5.13E-15 | -2.63127 | 1 | 1 RN7SL313P     | -      |
| ENSG00000242423 | 5.13E-15 | -2.63127 | 1 | 1 RP11-451N19.1 | K02870 |
| ENSG00000242425 | 5.13E-15 | -2.63127 | 1 | 1 RN7SL818P     | -      |
| ENSG00000242428 | 5.13E-15 | -2.63127 | 1 | 1 RP11-147N17.1 | -      |
| ENSG00000242429 | 5.13E-15 | -2.63127 | 1 | 1 RP11-19G24.2  | -      |
| ENSG00000242430 | 5.13E-15 | -2.63127 | 1 | 1 RN7SL274P     | -      |
| ENSG00000242431 | 5.13E-15 | -2.63127 | 1 | 1 RP11-731J8.1  | K02889 |
| ENSG00000242435 | 5.13E-15 | -2.63127 | 1 | 1 UPK3BP1       | -      |
| ENSG00000242436 | 5.13E-15 | -2.63127 | 1 | 1 RN7SL789P     | -      |
| ENSG00000242439 | 5.13E-15 | -2.63127 | 1 | 1 CTD-2349P21.1 | K02962 |
| ENSG00000242440 | 5.13E-15 | -2.63127 | 1 | 1 RP11-501O2.5  | -      |
| ENSG00000242441 | 5.13E-15 | -2.63127 | 1 | 1 GTF2A1L       | K03122 |
| ENSG00000242443 | 5.13E-15 | -2.63127 | 1 | 1 RN7SL759P     | -      |
| ENSG00000242444 | 5.13E-15 | -2.63127 | 1 | 1 RP11-320N7.1  | K02883 |
| ENSG00000242456 | 5.13E-15 | -2.63127 | 1 | 1 RP11-12N13.4  | K02262 |
| ENSG00000242457 | 5.13E-15 | -2.63127 | 1 | 1 RBBP4P2       | K10752 |
| ENSG00000242461 | 5.13E-15 | -2.63127 | 1 | 1 RPS15AP32     | K02957 |
| ENSG00000242463 | 5.13E-15 | -2.63127 | 1 | 1 RN7SL500P     | -      |
| ENSG00000242472 | 5.13E-15 | -2.63127 | 1 | 1 IGHJ5         | -      |
| ENSG00000242473 | 5.13E-15 | -2.63127 | 1 | 1 KIR2DP1       | K07980 |
| ENSG00000242479 | 5.13E-15 | -2.63127 | 1 | 1 RP11-383G6.4  | K16194 |
| ENSG00000242480 | 5.13E-15 | -2.63127 | 1 | 1 RN7SL286P     | -      |
| ENSG00000242482 | 5.13E-15 | -2.63127 | 1 | 1 RN7SL392P     | -      |
| ENSG00000242483 | 5.13E-15 | -2.63127 | 1 | 1 RN7SL293P     | -      |
| ENSG00000242486 | 5.13E-15 | -2.63127 | 1 | 1 RP1-104O17.2  | -      |
| ENSG00000242488 | 5.13E-15 | -2.63127 | 1 | 1 RP11-270M14.1 | K02981 |
| ENSG00000242493 | 5.13E-15 | -2.63127 | 1 | 1 RN7SL37P      | -      |
| ENSG00000242502 | 5.13E-15 | -2.63127 | 1 | 1 RN7SL536P     | -      |
| ENSG00000242507 | 5.13E-15 | -2.63127 | 1 | 1 RP3-477O4.5   | K00780 |
| ENSG00000242509 | 5.13E-15 | -2.63127 | 1 | 1 RN7SL156P     | -      |
| ENSG00000242510 | 5.13E-15 | -2.63127 | 1 | 1 NDUFB4P1      | K03960 |
| ENSG00000242512 | 5.13E-15 | -2.63127 | 1 | 1 RP11-416O18.1 | -      |
| ENSG00000242515 | 5.13E-15 | -2.63127 | 1 | 1 UGT1A10       | K00699 |
| ENSG00000242516 | 5.13E-15 | -2.63127 | 1 | 1 LINC00960     | -      |
| ENSG00000242520 | 5.13E-15 | -2.63127 | 1 | 1 MAGEA5        | -      |
| ENSG00000242522 | 5.13E-15 | -2.63127 | 1 | 1 KLHL6-AS1     | -      |

|                 |          |          |   |                  |        |
|-----------------|----------|----------|---|------------------|--------|
| ENSG00000242524 | 5.13E-15 | -2.63127 | 1 | 1 OR2U2P         | K04257 |
| ENSG00000242525 | 5.13E-15 | -2.63127 | 1 | 1 OR7E100P       | K04257 |
| ENSG00000242527 | 5.13E-15 | -2.63127 | 1 | 1 RP11-159H22.1  | K02921 |
| ENSG00000242529 | 5.13E-15 | -2.63127 | 1 | 1 AHCYP8         | K01251 |
| ENSG00000242531 | 5.13E-15 | -2.63127 | 1 | 1 RP11-299J3.6   | K14963 |
| ENSG00000242534 | 5.13E-15 | -2.63127 | 1 | 1 IGKV2D-28      | -      |
| ENSG00000242536 | 5.13E-15 | -2.63127 | 1 | 1 RP11-290K4.2   | -      |
| ENSG00000242537 | 5.13E-15 | -2.63127 | 1 | 1 RP11-294L13.1  | K10865 |
| ENSG00000242540 | 5.13E-15 | -2.63127 | 1 | 1 AC010729.1     | -      |
| ENSG00000242542 | 5.13E-15 | -2.63127 | 1 | 1 RN7SL489P      | -      |
| ENSG00000242545 | 5.13E-15 | -2.63127 | 1 | 1 RP11-719N22.2  | -      |
| ENSG00000242547 | 5.13E-15 | -2.63127 | 1 | 1 RN7SL169P      | -      |
| ENSG00000242550 | 5.13E-15 | -2.63127 | 1 | 1 SERPINB10      | K13963 |
| ENSG00000242552 | 5.13E-15 | -2.63127 | 1 | 1 MRPL42P4       | -      |
| ENSG00000242559 | 5.13E-15 | -2.63127 | 1 | 1 RN7SL144P      | -      |
| ENSG00000242560 | 5.13E-15 | -2.63127 | 1 | 1 RN7SL797P      | -      |
| ENSG00000242561 | 5.13E-15 | -2.63127 | 1 | 1 ATP5LP5        | -      |
| ENSG00000242562 | 5.13E-15 | -2.63127 | 1 | 1 DCAF13P1       | K11806 |
| ENSG00000242565 | 5.13E-15 | -2.63127 | 1 | 1 RN7SL372P      | -      |
| ENSG00000242568 | 5.13E-15 | -2.63127 | 1 | 1 RP11-875H7.1   | -      |
| ENSG00000242571 | 5.13E-15 | -2.63127 | 1 | 1 RPL21P11       | K02889 |
| ENSG00000242573 | 5.13E-15 | -2.63127 | 1 | 1 ACTR3P3        | K18584 |
| ENSG00000242574 | 5.13E-15 | -2.63127 | 1 | 1 HLA-DMB        | K06752 |
| ENSG00000242578 | 5.13E-15 | -2.63127 | 1 | 1 RP11-469J4.3   | -      |
| ENSG00000242580 | 5.13E-15 | -2.63127 | 1 | 1 IGKV1D-43      | -      |
| ENSG00000242583 | 5.13E-15 | -2.63127 | 1 | 1 RP11-379K17.9  | K11428 |
| ENSG00000242586 | 5.13E-15 | -2.63127 | 1 | 1 RP11-481N16.1  | K17570 |
| ENSG00000242590 | 5.13E-15 | -2.63127 | 1 | 1 RP11-5407.14   | -      |
| ENSG00000242595 | 5.13E-15 | -2.63127 | 1 | 1 RP11-648L3.1   | K02898 |
| ENSG00000242598 | 5.13E-15 | -2.63127 | 1 | 1 MED28P8        | K15141 |
| ENSG00000242600 | 5.13E-15 | -2.63127 | 1 | 1 MBL1P          | K03991 |
| ENSG00000242608 | 5.13E-15 | -2.63127 | 1 | 1 RPS23P5        | K02973 |
| ENSG00000242609 | 5.13E-15 | -2.63127 | 1 | 1 RP11-398A8.1   | -      |
| ENSG00000242610 | 5.13E-15 | -2.63127 | 1 | 1 OR5BH1P        | K04257 |
| ENSG00000242611 | 5.13E-15 | -2.63127 | 1 | 1 AC093627.8     | -      |
| ENSG00000242613 | 5.13E-15 | -2.63127 | 1 | 1 RP11-174O3.4   | -      |
| ENSG00000242614 | 5.13E-15 | -2.63127 | 1 | 1 RN7SL164P      | -      |
| ENSG00000242615 | 5.13E-15 | -2.63127 | 1 | 1 CTC-359D24.3   | -      |
| ENSG00000242618 | 5.13E-15 | -2.63127 | 1 | 1 RP11-433A10.2  | -      |
| ENSG00000242620 | 5.13E-15 | -2.63127 | 1 | 1 RN7SL736P      | -      |
| ENSG00000242628 | 5.13E-15 | -2.63127 | 1 | 1 AC009228.1     | -      |
| ENSG00000242631 | 5.13E-15 | -2.63127 | 1 | 1 RP11-508N12.4  | -      |
| ENSG00000242634 | 5.13E-15 | -2.63127 | 1 | 1 RPS24P16       | K02974 |
| ENSG00000242635 | 5.13E-15 | -2.63127 | 1 | 1 RPS14P7        | -      |
| ENSG00000242636 | 5.13E-15 | -2.63127 | 1 | 1 RPL21P129      | K02889 |
| ENSG00000242638 | 5.13E-15 | -2.63127 | 1 | 1 RN7SL294P      | -      |
| ENSG00000242640 | 5.13E-15 | -2.63127 | 1 | 1 RP11-302F12.1  | K02980 |
| ENSG00000242641 | 5.13E-15 | -2.63127 | 1 | 1 LINC00971      | -      |
| ENSG00000242650 | 5.13E-15 | -2.63127 | 1 | 1 RN7SL292P      | -      |
| ENSG00000242651 | 5.13E-15 | -2.63127 | 1 | 1 RN7SL862P      | -      |
| ENSG00000242653 | 5.13E-15 | -2.63127 | 1 | 1 RN7SL132P      | -      |
| ENSG00000242654 | 5.13E-15 | -2.63127 | 1 | 1 RPL32P14       | -      |
| ENSG00000242657 | 5.13E-15 | -2.63127 | 1 | 1 RN7SL581P      | -      |
| ENSG00000242659 | 5.13E-15 | -2.63127 | 1 | 1 RP11-271C24.2  | -      |
| ENSG00000242660 | 5.13E-15 | -2.63127 | 1 | 1 RP11-1094M14.1 | K02924 |
| ENSG00000242661 | 5.13E-15 | -2.63127 | 1 | 1 RPS3AP43       | K02984 |
| ENSG00000242663 | 5.13E-15 | -2.63127 | 1 | 1 RP11-196G18.21 | -      |
| ENSG00000242667 | 5.13E-15 | -2.63127 | 1 | 1 RP11-745A24.2  | K02947 |

|                 |          |          |   |                 |        |
|-----------------|----------|----------|---|-----------------|--------|
| ENSG00000242668 | 5.13E-15 | -2.63127 | 1 | 1 RN7SL317P     | —      |
| ENSG00000242670 | 5.13E-15 | -2.63127 | 1 | 1 RP11-601I15.1 | K02891 |
| ENSG00000242671 | 5.13E-15 | -2.63127 | 1 | 1 RP11-232M24.1 | —      |
| ENSG00000242673 | 5.13E-15 | -2.63127 | 1 | 1 RN7SL167P     | —      |
| ENSG00000242675 | 5.13E-15 | -2.63127 | 1 | 1 RPS16P9       | K02960 |
| ENSG00000242676 | 5.13E-15 | -2.63127 | 1 | 1 ANKRD20A12P   | K17299 |
| ENSG00000242683 | 5.13E-15 | -2.63127 | 1 | 1 CTB-46B19.1   | K02870 |
| ENSG00000242686 | 5.13E-15 | -2.63127 | 1 | 1 RP11-1191J2.2 | —      |
| ENSG00000242688 | 5.13E-15 | -2.63127 | 1 | 1 RN7SL304P     | —      |
| ENSG00000242692 | 5.13E-15 | -2.63127 | 1 | 1 RPS27AP1      | K02977 |
| ENSG00000242696 | 5.13E-15 | -2.63127 | 1 | 1 RN7SL40P      | —      |
| ENSG00000242697 | 5.13E-15 | -2.63127 | 1 | 1 RPL5P12       | K02932 |
| ENSG00000242699 | 5.13E-15 | -2.63127 | 1 | 1 RN7SL516P     | —      |
| ENSG00000242703 | 5.13E-15 | -2.63127 | 1 | 1 CCT4P1        | K09496 |
| ENSG00000242705 | 5.13E-15 | -2.63127 | 1 | 1 NARG2P2       | —      |
| ENSG00000242706 | 5.13E-15 | -2.63127 | 1 | 1 CTD-2015H6.2  | K02977 |
| ENSG00000242707 | 5.13E-15 | -2.63127 | 1 | 1 RN7SL362P     | —      |
| ENSG00000242709 | 5.13E-15 | -2.63127 | 1 | 1 RPL30P9       | K02908 |
| ENSG00000242712 | 5.13E-15 | -2.63127 | 1 | 1 RN7SL529P     | —      |
| ENSG00000242719 | 5.13E-15 | -2.63127 | 1 | 1 RN7SL806P     | —      |
| ENSG00000242727 | 5.13E-15 | -2.63127 | 1 | 1 RP11-123J14.1 | K02898 |
| ENSG00000242728 | 5.13E-15 | -2.63127 | 1 | 1 UQCRHP4       | K00416 |
| ENSG00000242729 | 5.13E-15 | -2.63127 | 1 | 1 RP11-124G5.1  | K02940 |
| ENSG00000242731 | 5.13E-15 | -2.63127 | 1 | 1 FAM86LP       | K12354 |
| ENSG00000242732 | 5.13E-15 | -2.63127 | 1 | 1 RGAG4         | —      |
| ENSG00000242735 | 5.13E-15 | -2.63127 | 1 | 1 AC018462.3    | K02998 |
| ENSG00000242736 | 5.13E-15 | -2.63127 | 1 | 1 TRBV1         | —      |
| ENSG00000242741 | 5.13E-15 | -2.63127 | 1 | 1 RP11-20B7.1   | —      |
| ENSG00000242747 | 5.13E-15 | -2.63127 | 1 | 1 RP11-30K9.1   | K02889 |
| ENSG00000242752 | 5.13E-15 | -2.63127 | 1 | 1 TRNAQ41P      | —      |
| ENSG00000242753 | 5.13E-15 | -2.63127 | 1 | 1 RP11-716O23.2 | —      |
| ENSG00000242757 | 5.13E-15 | -2.63127 | 1 | 1 CTD-2090I13.3 | K02964 |
| ENSG00000242764 | 5.13E-15 | -2.63127 | 1 | 1 RN7SL824P     | —      |
| ENSG00000242766 | 5.13E-15 | -2.63127 | 1 | 1 IGKV1D-17     | —      |
| ENSG00000242767 | 5.13E-15 | -2.63127 | 1 | 1 ZBTB20-AS4    | —      |
| ENSG00000242768 | 5.13E-15 | -2.63127 | 1 | 1 RP11-556G22.1 | K02910 |
| ENSG00000242769 | 5.13E-15 | -2.63127 | 1 | 1 RN7SL432P     | —      |
| ENSG00000242770 | 5.13E-15 | -2.63127 | 1 | 1 RP11-180K7.1  | —      |
| ENSG00000242771 | 5.13E-15 | -2.63127 | 1 | 1 TRBV5-2       | K10785 |
| ENSG00000242779 | 5.13E-15 | -2.63127 | 1 | 1 ZNF702P       | K09228 |
| ENSG00000242781 | 5.13E-15 | -2.63127 | 1 | 1 RP11-47P18.2  | —      |
| ENSG00000242790 | 5.13E-15 | -2.63127 | 1 | 1 RP11-451G4.3  | —      |
| ENSG00000242793 | 5.13E-15 | -2.63127 | 1 | 1 AC135999.2    | —      |
| ENSG00000242794 | 5.13E-15 | -2.63127 | 1 | 1 RN7SL299P     | —      |
| ENSG00000242795 | 5.13E-15 | -2.63127 | 1 | 1 RP11-3K16.2   | —      |
| ENSG00000242807 | 5.13E-15 | -2.63127 | 1 | 1 RPL26P31      | K02898 |
| ENSG00000242808 | 5.13E-15 | -2.63127 | 1 | 1 SOX2-OT       | —      |
| ENSG00000242810 | 5.13E-15 | -2.63127 | 1 | 1 MRPL42P6      | K17423 |
| ENSG00000242811 | 5.13E-15 | -2.63127 | 1 | 1 RN7SL229P     | —      |
| ENSG00000242814 | 5.13E-15 | -2.63127 | 1 | 1 RP11-436H11.1 | K02903 |
| ENSG00000242816 | 5.13E-15 | -2.63127 | 1 | 1 RP11-768G7.3  | —      |
| ENSG00000242818 | 5.13E-15 | -2.63127 | 1 | 1 RN7SL846P     | —      |
| ENSG00000242822 | 5.13E-15 | -2.63127 | 1 | 1 RN7SL575P     | —      |
| ENSG00000242828 | 5.13E-15 | -2.63127 | 1 | 1 RP11-47P18.1  | —      |
| ENSG00000242829 | 5.13E-15 | -2.63127 | 1 | 1 RPS26P21      | K02976 |
| ENSG00000242834 | 5.13E-15 | -2.63127 | 1 | 1 RPL7AP56      | K02936 |
| ENSG00000242836 | 5.13E-15 | -2.63127 | 1 | 1 RP11-52L11.7  | K02262 |
| ENSG00000242841 | 5.13E-15 | -2.63127 | 1 | 1 KRT8P35       | K07605 |

|                 |          |          |   |                 |        |
|-----------------|----------|----------|---|-----------------|--------|
| ENSG00000242849 | 5.13E-15 | -2.63127 | 1 | 1 ALDOAP1       | K01623 |
| ENSG00000242850 | 5.13E-15 | -2.63127 | 1 | 1 RPL23AP68     | -      |
| ENSG00000242854 | 5.13E-15 | -2.63127 | 1 | 1 DNMI1P24      | K01528 |
| ENSG00000242855 | 5.13E-15 | -2.63127 | 1 | 1 RN7SL496P     | -      |
| ENSG00000242856 | 5.13E-15 | -2.63127 | 1 | 1 VN1R105P      | K04614 |
| ENSG00000242858 | 5.13E-15 | -2.63127 | 1 | 1 CTC-484M2.1   | K02872 |
| ENSG00000242860 | 5.13E-15 | -2.63127 | 1 | 1 RN7SL180P     | -      |
| ENSG00000242863 | 5.13E-15 | -2.63127 | 1 | 1 RN7SL677P     | -      |
| ENSG00000242865 | 5.13E-15 | -2.63127 | 1 | 1 RN7SL244P     | -      |
| ENSG00000242871 | 5.13E-15 | -2.63127 | 1 | 1 RN7SL109P     | -      |
| ENSG00000242875 | 5.13E-15 | -2.63127 | 1 | 1 RBMY1B        | K12885 |
| ENSG00000242879 | 5.13E-15 | -2.63127 | 1 | 1 AC006335.11   | K03539 |
| ENSG00000242880 | 5.13E-15 | -2.63127 | 1 | 1 RP11-190P13.2 | -      |
| ENSG00000242887 | 5.13E-15 | -2.63127 | 1 | 1 IGHJ3         | -      |
| ENSG00000242889 | 5.13E-15 | -2.63127 | 1 | 1 RN7SL449P     | -      |
| ENSG00000242893 | 5.13E-15 | -2.63127 | 1 | 1 RN7SL413P     | -      |
| ENSG00000242894 | 5.13E-15 | -2.63127 | 1 | 1 RN7SL634P     | -      |
| ENSG00000242899 | 5.13E-15 | -2.63127 | 1 | 1 RPL7P16       | K02937 |
| ENSG00000242902 | 5.13E-15 | -2.63127 | 1 | 1 RP11-309L24.2 | -      |
| ENSG00000242908 | 5.13E-15 | -2.63127 | 1 | 1 RP11-454C18.2 | -      |
| ENSG00000242911 | 5.13E-15 | -2.63127 | 1 | 1 RP11-118N24.2 | -      |
| ENSG00000242912 | 5.13E-15 | -2.63127 | 1 | 1 RN7SL384P     | -      |
| ENSG00000242915 | 5.13E-15 | -2.63127 | 1 | 1 SNRPGP7       | -      |
| ENSG00000242922 | 5.13E-15 | -2.63127 | 1 | 1 RPL21P104     | K02889 |
| ENSG00000242924 | 5.13E-15 | -2.63127 | 1 | 1 RP11-298O21.6 | -      |
| ENSG00000242925 | 5.13E-15 | -2.63127 | 1 | 1 PLCH1-AS2     | -      |
| ENSG00000242928 | 5.13E-15 | -2.63127 | 1 | 1 RN7SL868P     | -      |
| ENSG00000242931 | 5.13E-15 | -2.63127 | 1 | 1 RPL7P49       | K02937 |
| ENSG00000242936 | 5.13E-15 | -2.63127 | 1 | 1 RPL30P6       | -      |
| ENSG00000242943 | 5.13E-15 | -2.63127 | 1 | 1 NKAIN1P1      | -      |
| ENSG00000242945 | 5.13E-15 | -2.63127 | 1 | 1 RPL29P32      | -      |
| ENSG00000242948 | 5.13E-15 | -2.63127 | 1 | 1 EPS15P1       | -      |
| ENSG00000242950 | 5.13E-15 | -2.63127 | 1 | 1 ERVW-1        | -      |
| ENSG00000242952 | 5.13E-15 | -2.63127 | 1 | 1 RP11-187O7.1  | K02998 |
| ENSG00000242953 | 5.13E-15 | -2.63127 | 1 | 1 RP11-803B1.3  | K17299 |
| ENSG00000242958 | 5.13E-15 | -2.63127 | 1 | 1 RP11-662B19.1 | -      |
| ENSG00000242962 | 5.13E-15 | -2.63127 | 1 | 1 RN7SL106P     | -      |
| ENSG00000242963 | 5.13E-15 | -2.63127 | 1 | 1 RP11-143E21.1 | -      |
| ENSG00000242970 | 5.13E-15 | -2.63127 | 1 | 1 AC068522.4    | K02976 |
| ENSG00000242971 | 5.13E-15 | -2.63127 | 1 | 1 RN7SL233P     | -      |
| ENSG00000242973 | 5.13E-15 | -2.63127 | 1 | 1 RP11-446F17.3 | -      |
| ENSG00000242976 | 5.13E-15 | -2.63127 | 1 | 1 RN7SL177P     | -      |
| ENSG00000242978 | 5.13E-15 | -2.63127 | 1 | 1 RP4-545C24.5  | K03767 |
| ENSG00000242979 | 5.13E-15 | -2.63127 | 1 | 1 RPS15AP18     | K02957 |
| ENSG00000242983 | 5.13E-15 | -2.63127 | 1 | 1 CABYRP1       | -      |
| ENSG00000242985 | 5.13E-15 | -2.63127 | 1 | 1 RN7SL50P      | -      |
| ENSG00000242986 | 5.13E-15 | -2.63127 | 1 | 1 RP11-1110J8.1 | K02889 |
| ENSG00000242989 | 5.13E-15 | -2.63127 | 1 | 1 RN7SL332P     | -      |
| ENSG00000242990 | 5.13E-15 | -2.63127 | 1 | 1 RP11-571M6.1  | K02872 |
| ENSG00000242991 | 5.13E-15 | -2.63127 | 1 | 1 RPL7P40       | -      |
| ENSG00000242993 | 5.13E-15 | -2.63127 | 1 | 1 RP11-697H10.1 | K02912 |
| ENSG00000242995 | 5.13E-15 | -2.63127 | 1 | 1 RP11-1085N6.1 | K02929 |
| ENSG00000242998 | 5.13E-15 | -2.63127 | 1 | 1 RN7SL379P     | -      |
| ENSG00000242999 | 5.13E-15 | -2.63127 | 1 | 1 RN7SL239P     | -      |
| ENSG00000243005 | 5.13E-15 | -2.63127 | 1 | 1 RN7SL16P      | -      |
| ENSG00000243007 | 5.13E-15 | -2.63127 | 1 | 1 RP11-106M3.1  | K02870 |
| ENSG00000243008 | 5.13E-15 | -2.63127 | 1 | 1 RP11-556N21.1 | -      |
| ENSG00000243011 | 5.13E-15 | -2.63127 | 1 | 1 RN7SL266P     | -      |



|                 |          |          |   |                 |        |
|-----------------|----------|----------|---|-----------------|--------|
| ENSG00000243012 | 5.13E-15 | -2.63127 | 1 | 1 RP11-292E2.4  | -      |
| ENSG00000243014 | 5.13E-15 | -2.63127 | 1 | 1 PTMAP8        | K13784 |
| ENSG00000243016 | 5.13E-15 | -2.63127 | 1 | 1 RP11-305F5.2  | -      |
| ENSG00000243020 | 5.13E-15 | -2.63127 | 1 | 1 RPL7P39       | K02937 |
| ENSG00000243022 | 5.13E-15 | -2.63127 | 1 | 1 RP11-221E20.4 | -      |
| ENSG00000243023 | 5.13E-15 | -2.63127 | 1 | 1 UBA52P3       | K02927 |
| ENSG00000243025 | 5.13E-15 | -2.63127 | 1 | 1 MTAPP1        | -      |
| ENSG00000243027 | 5.13E-15 | -2.63127 | 1 | 1 RN7SL354P     | -      |
| ENSG00000243029 | 5.13E-15 | -2.63127 | 1 | 1 RN7SL635P     | -      |
| ENSG00000243033 | 5.13E-15 | -2.63127 | 1 | 1 GAPDHP47      | K00134 |
| ENSG00000243035 | 5.13E-15 | -2.63127 | 1 | 1 RN7SL810P     | -      |
| ENSG00000243038 | 5.13E-15 | -2.63127 | 1 | 1 RP11-58E21.1  | K01557 |
| ENSG00000243039 | 5.13E-15 | -2.63127 | 1 | 1 RN7SL210P     | -      |
| ENSG00000243040 | 5.13E-15 | -2.63127 | 1 | 1 RBMY2FP       | K12885 |
| ENSG00000243044 | 5.13E-15 | -2.63127 | 1 | 1 RP13-526J3.1  | K09228 |
| ENSG00000243048 | 5.13E-15 | -2.63127 | 1 | 1 FTH1P18       | K00522 |
| ENSG00000243049 | 5.13E-15 | -2.63127 | 1 | 1 RN7SL33P      | -      |
| ENSG00000243050 | 5.13E-15 | -2.63127 | 1 | 1 RPL30P10      | K02908 |
| ENSG00000243051 | 5.13E-15 | -2.63127 | 1 | 1 RN7SL269P     | -      |
| ENSG00000243053 | 5.13E-15 | -2.63127 | 1 | 1 RPL31P58      | K02910 |
| ENSG00000243055 | 5.13E-15 | -2.63127 | 1 | 1 GK-AS1        | -      |
| ENSG00000243058 | 5.13E-15 | -2.63127 | 1 | 1 RPL39P33      | K02924 |
| ENSG00000243059 | 5.13E-15 | -2.63127 | 1 | 1 RN7SL400P     | -      |
| ENSG00000243062 | 5.13E-15 | -2.63127 | 1 | 1 RP11-12M5.1   | -      |
| ENSG00000243063 | 5.13E-15 | -2.63127 | 1 | 1 IGKV3-7       | -      |
| ENSG00000243064 | 5.13E-15 | -2.63127 | 1 | 1 ABCC13        | -      |
| ENSG00000243066 | 5.13E-15 | -2.63127 | 1 | 1 RN7SL842P     | -      |
| ENSG00000243069 | 5.13E-15 | -2.63127 | 1 | 1 ARHGFEF26-AS1 | -      |
| ENSG00000243072 | 5.13E-15 | -2.63127 | 1 | 1 GS1-388B5.2   | -      |
| ENSG00000243073 | 5.13E-15 | -2.63127 | 1 | 1 PRAMEF4       | -      |
| ENSG00000243075 | 5.13E-15 | -2.63127 | 1 | 1 RN7SL519P     | -      |
| ENSG00000243081 | 5.13E-15 | -2.63127 | 1 | 1 RP11-231E6.1  | -      |
| ENSG00000243083 | 5.13E-15 | -2.63127 | 1 | 1 LINC00870     | -      |
| ENSG00000243085 | 5.13E-15 | -2.63127 | 1 | 1 RP11-392E22.3 | -      |
| ENSG00000243095 | 5.13E-15 | -2.63127 | 1 | 1 RPL3P10       | K02925 |
| ENSG00000243099 | 5.13E-15 | -2.63127 | 1 | 1 AC020983.5    | K02880 |
| ENSG00000243101 | 5.13E-15 | -2.63127 | 1 | 1 RPS3P7        | K02985 |
| ENSG00000243103 | 5.13E-15 | -2.63127 | 1 | 1 RN7SL452P     | -      |
| ENSG00000243104 | 5.13E-15 | -2.63127 | 1 | 1 AC012363.10   | K03882 |
| ENSG00000243113 | 5.13E-15 | -2.63127 | 1 | 1 RP11-480I12.9 | K05692 |
| ENSG00000243115 | 5.13E-15 | -2.63127 | 1 | 1 RN7SL849P     | -      |
| ENSG00000243122 | 5.13E-15 | -2.63127 | 1 | 1 RP11-25H11.1  | K02958 |
| ENSG00000243124 | 5.13E-15 | -2.63127 | 1 | 1 RN7SL643P     | -      |
| ENSG00000243125 | 5.13E-15 | -2.63127 | 1 | 1 RN7SL807P     | -      |
| ENSG00000243129 | 5.13E-15 | -2.63127 | 1 | 1 RP11-377D9.1  | K02976 |
| ENSG00000243135 | 5.13E-15 | -2.63127 | 1 | 1 UGT1A3        | K00699 |
| ENSG00000243136 | 5.13E-15 | -2.63127 | 1 | 1 RN7SL22P      | -      |
| ENSG00000243141 | 5.13E-15 | -2.63127 | 1 | 1 RP11-757G14.1 | -      |
| ENSG00000243144 | 5.13E-15 | -2.63127 | 1 | 1 RP11-115N4.1  | -      |
| ENSG00000243149 | 5.13E-15 | -2.63127 | 1 | 1 RP11-543A18.1 | -      |
| ENSG00000243150 | 5.13E-15 | -2.63127 | 1 | 1 RP11-538P18.2 | -      |
| ENSG00000243154 | 5.13E-15 | -2.63127 | 1 | 1 CTD-2501O3.2  | -      |
| ENSG00000243160 | 5.13E-15 | -2.63127 | 1 | 1 RP11-342F17.2 | K02936 |
| ENSG00000243164 | 5.13E-15 | -2.63127 | 1 | 1 RP11-166B14.1 | K02910 |
| ENSG00000243165 | 5.13E-15 | -2.63127 | 1 | 1 RP11-79M21.3  | -      |
| ENSG00000243167 | 5.13E-15 | -2.63127 | 1 | 1 RPS10P28      | K02947 |
| ENSG00000243171 | 5.13E-15 | -2.63127 | 1 | 1 RP11-273P3.1  | K02880 |
| ENSG00000243173 | 5.13E-15 | -2.63127 | 1 | 1 RN7SL861P     | -      |

|                 |          |          |   |                  |        |
|-----------------|----------|----------|---|------------------|--------|
| ENSG00000243175 | 5.13E-15 | -2.63127 | 1 | 1 RP11-58H15.1   | K02998 |
| ENSG00000243179 | 5.13E-15 | -2.63127 | 1 | 1 AC110769.3     | -      |
| ENSG00000243181 | 5.13E-15 | -2.63127 | 1 | 1 RP11-734J24.1  | K02889 |
| ENSG00000243187 | 5.13E-15 | -2.63127 | 1 | 1 CCDC39-AS1     | -      |
| ENSG00000243188 | 5.13E-15 | -2.63127 | 1 | 1 HNRNPA1P17     | K12741 |
| ENSG00000243193 | 5.13E-15 | -2.63127 | 1 | 1 CTA-360L10.1   | -      |
| ENSG00000243195 | 5.13E-15 | -2.63127 | 1 | 1 TUBBP11        | -      |
| ENSG00000243197 | 5.13E-15 | -2.63127 | 1 | 1 TUSC7          | -      |
| ENSG00000243207 | 5.13E-15 | -2.63127 | 1 | 1 PPAN-P2RY11    | K14859 |
| ENSG00000243220 | 5.13E-15 | -2.63127 | 1 | 1 AC006159.4     | -      |
| ENSG00000243227 | 5.13E-15 | -2.63127 | 1 | 1 RN7SL55P       | -      |
| ENSG00000243230 | 5.13E-15 | -2.63127 | 1 | 1 RP11-286H14.8  | -      |
| ENSG00000243232 | 5.13E-15 | -2.63127 | 1 | 1 PCDHAC2        | K16493 |
| ENSG00000243234 | 5.13E-15 | -2.63127 | 1 | 1 CTD-2583A14.1  | K02885 |
| ENSG00000243236 | 5.13E-15 | -2.63127 | 1 | 1 RP1-214M20.2   | K00799 |
| ENSG00000243238 | 5.13E-15 | -2.63127 | 1 | 1 IGKV2-30       | -      |
| ENSG00000243250 | 5.13E-15 | -2.63127 | 1 | 1 RPS6P16        | K02991 |
| ENSG00000243254 | 5.13E-15 | -2.63127 | 1 | 1 RN7SL350P      | -      |
| ENSG00000243256 | 5.13E-15 | -2.63127 | 1 | 1 RPL30P14       | K02908 |
| ENSG00000243257 | 5.13E-15 | -2.63127 | 1 | 1 RP11-567P17.2  | -      |
| ENSG00000243260 | 5.13E-15 | -2.63127 | 1 | 1 RN7SL558P      | -      |
| ENSG00000243264 | 5.13E-15 | -2.63127 | 1 | 1 IGKV2D-29      | -      |
| ENSG00000243265 | 5.13E-15 | -2.63127 | 1 | 1 RP11-1149O23.1 | K02893 |
| ENSG00000243267 | 5.13E-15 | -2.63127 | 1 | 1 RN7SL614P      | -      |
| ENSG00000243268 | 5.13E-15 | -2.63127 | 1 | 1 ATP5A1P1       | K02132 |
| ENSG00000243273 | 5.13E-15 | -2.63127 | 1 | 1 RP11-166N6.2   | -      |
| ENSG00000243274 | 5.13E-15 | -2.63127 | 1 | 1 RN7SL571P      | -      |
| ENSG00000243276 | 5.13E-15 | -2.63127 | 1 | 1 RP11-384F7.1   | -      |
| ENSG00000243280 | 5.13E-15 | -2.63127 | 1 | 1 RP11-477G18.2  | K02929 |
| ENSG00000243287 | 5.13E-15 | -2.63127 | 1 | 1 RPS17P14       | K02962 |
| ENSG00000243289 | 5.13E-15 | -2.63127 | 1 | 1 CTGLF8P        | K12491 |
| ENSG00000243290 | 5.13E-15 | -2.63127 | 1 | 1 IGKV1-12       | -      |
| ENSG00000243295 | 5.13E-15 | -2.63127 | 1 | 1 CTD-2185K10.1  | -      |
| ENSG00000243296 | 5.13E-15 | -2.63127 | 1 | 1 RP11-779P15.1  | -      |
| ENSG00000243297 | 5.13E-15 | -2.63127 | 1 | 1 RPL31P61       | K02910 |
| ENSG00000243300 | 5.13E-15 | -2.63127 | 1 | 1 LINC00359      | -      |
| ENSG00000243303 | 5.13E-15 | -2.63127 | 1 | 1 RP11-268I9.1   | K02915 |
| ENSG00000243304 | 5.13E-15 | -2.63127 | 1 | 1 CTC-428G20.1   | K02981 |
| ENSG00000243305 | 5.13E-15 | -2.63127 | 1 | 1 RP11-362A9.3   | -      |
| ENSG00000243312 | 5.13E-15 | -2.63127 | 1 | 1 RP11-397E7.1   | K02934 |
| ENSG00000243313 | 5.13E-15 | -2.63127 | 1 | 1 RN7SL285P      | -      |
| ENSG00000243314 | 5.13E-15 | -2.63127 | 1 | 1 RP11-538P18.1  | K02951 |
| ENSG00000243316 | 5.13E-15 | -2.63127 | 1 | 1 GUCY2GP        | -      |
| ENSG00000243319 | 5.13E-15 | -2.63127 | 1 | 1 FGF14-IT1      | -      |
| ENSG00000243321 | 5.13E-15 | -2.63127 | 1 | 1 snoU13         | -      |
| ENSG00000243323 | 5.13E-15 | -2.63127 | 1 | 1 PTPRVP         | K18036 |
| ENSG00000243328 | 5.13E-15 | -2.63127 | 1 | 1 RP11-520P18.1  | K02976 |
| ENSG00000243338 | 5.13E-15 | -2.63127 | 1 | 1 RN7SL307P      | -      |
| ENSG00000243345 | 5.13E-15 | -2.63127 | 1 | 1 RP11-458K10.3  | -      |
| ENSG00000243346 | 5.13E-15 | -2.63127 | 1 | 1 RN7SL601P      | -      |
| ENSG00000243347 | 5.13E-15 | -2.63127 | 1 | 1 RP11-501O2.4   | -      |
| ENSG00000243349 | 5.13E-15 | -2.63127 | 1 | 1 RP11-445N18.7  | -      |
| ENSG00000243350 | 5.13E-15 | -2.63127 | 1 | 1 RP11-379F12.3  | -      |
| ENSG00000243352 | 5.13E-15 | -2.63127 | 1 | 1 RN7SL8P        | -      |
| ENSG00000243353 | 5.13E-15 | -2.63127 | 1 | 1 RP11-667M19.1  | -      |
| ENSG00000243355 | 5.13E-15 | -2.63127 | 1 | 1 RP11-57G22.1   | K02978 |
| ENSG00000243359 | 5.13E-15 | -2.63127 | 1 | 1 RN7SL815P      | -      |
| ENSG00000243365 | 5.13E-15 | -2.63127 | 1 | 1 RN7SL278P      | -      |

|                 |          |          |   |                 |        |
|-----------------|----------|----------|---|-----------------|--------|
| ENSG00000243366 | 5.13E-15 | -2.63127 | 1 | 1 RN7SL60P      | -      |
| ENSG00000243368 | 5.13E-15 | -2.63127 | 1 | 1 MCCC1-AS1     | -      |
| ENSG00000243370 | 5.13E-15 | -2.63127 | 1 | 1 RN7SL775P     | -      |
| ENSG00000243373 | 5.13E-15 | -2.63127 | 1 | 1 RN7SL173P     | -      |
| ENSG00000243374 | 5.13E-15 | -2.63127 | 1 | 1 RN7SL72P      | -      |
| ENSG00000243378 | 5.13E-15 | -2.63127 | 1 | 1 RP11-646E18.3 | K01047 |
| ENSG00000243382 | 5.13E-15 | -2.63127 | 1 | 1 ATP5A1P10     | K02132 |
| ENSG00000243383 | 5.13E-15 | -2.63127 | 1 | 1 RN7SL89P      | -      |
| ENSG00000243384 | 5.13E-15 | -2.63127 | 1 | 1 RP11-475O23.2 | -      |
| ENSG00000243396 | 5.13E-15 | -2.63127 | 1 | 1 RP11-454H13.1 | K02912 |
| ENSG00000243398 | 5.13E-15 | -2.63127 | 1 | 1 RN7SL141P     | -      |
| ENSG00000243403 | 5.13E-15 | -2.63127 | 1 | 1 RP11-330L19.1 | K02976 |
| ENSG00000243410 | 5.13E-15 | -2.63127 | 1 | 1 RP11-245J9.4  | -      |
| ENSG00000243417 | 5.13E-15 | -2.63127 | 1 | 1 RP11-555K12.1 | K02984 |
| ENSG00000243420 | 5.13E-15 | -2.63127 | 1 | 1 RN7SL734P     | -      |
| ENSG00000243422 | 5.13E-15 | -2.63127 | 1 | 1 RP11-413E6.1  | K02893 |
| ENSG00000243423 | 5.13E-15 | -2.63127 | 1 | 1 RP5-837J1.1   | K02922 |
| ENSG00000243424 | 5.13E-15 | -2.63127 | 1 | 1 RN7SL107P     | -      |
| ENSG00000243426 | 5.13E-15 | -2.63127 | 1 | 1 RN7SL454P     | -      |
| ENSG00000243429 | 5.13E-15 | -2.63127 | 1 | 1 OR7E29P       | K04257 |
| ENSG00000243431 | 5.13E-15 | -2.63127 | 1 | 1 RPL5P30       | K02932 |
| ENSG00000243437 | 5.13E-15 | -2.63127 | 1 | 1 RN7SL370P     | -      |
| ENSG00000243438 | 5.13E-15 | -2.63127 | 1 | 1 LARP1BP2      | K18757 |
| ENSG00000243439 | 5.13E-15 | -2.63127 | 1 | 1 RN7SL352P     | -      |
| ENSG00000243440 | 5.13E-15 | -2.63127 | 1 | 1 AF165138.7    | -      |
| ENSG00000243444 | 5.13E-15 | -2.63127 | 1 | 1 PALM2         | K16519 |
| ENSG00000243445 | 5.13E-15 | -2.63127 | 1 | 1 RP11-715J22.1 | K02960 |
| ENSG00000243446 | 5.13E-15 | -2.63127 | 1 | 1 RN7SL284P     | -      |
| ENSG00000243453 | 5.13E-15 | -2.63127 | 1 | 1 COX7BP1       | K02271 |
| ENSG00000243455 | 5.13E-15 | -2.63127 | 1 | 1 RPS18P13      | K02964 |
| ENSG00000243464 | 5.13E-15 | -2.63127 | 1 | 1 RN7SL410P     | -      |
| ENSG00000243466 | 5.13E-15 | -2.63127 | 1 | 1 IGKV1-5       | -      |
| ENSG00000243468 | 5.13E-15 | -2.63127 | 1 | 1 INGX          | K17985 |
| ENSG00000243469 | 5.13E-15 | -2.63127 | 1 | 1 RPL7P51       | K02937 |
| ENSG00000243478 | 5.13E-15 | -2.63127 | 1 | 1 AOX2P         | K00157 |
| ENSG00000243480 | 5.13E-15 | -2.63127 | 1 | 1 AMY2A         | K01176 |
| ENSG00000243483 | 5.13E-15 | -2.63127 | 1 | 1 RP11-572M11.2 | K09507 |
| ENSG00000243485 | 5.13E-15 | -2.63127 | 1 | 1 MIR1302-10    | -      |
| ENSG00000243486 | 5.13E-15 | -2.63127 | 1 | 1 RP11-217E22.5 | -      |
| ENSG00000243488 | 5.13E-15 | -2.63127 | 1 | 1 RN7SL337P     | -      |
| ENSG00000243489 | 5.13E-15 | -2.63127 | 1 | 1 KRTAP10-11    | -      |
| ENSG00000243491 | 5.13E-15 | -2.63127 | 1 | 1 RP11-521D12.5 | -      |
| ENSG00000243494 | 5.13E-15 | -2.63127 | 1 | 1 CTC-550B14.1  | K02929 |
| ENSG00000243495 | 5.13E-15 | -2.63127 | 1 | 1 GMFBP1        | -      |
| ENSG00000243498 | 5.13E-15 | -2.63127 | 1 | 1 UBA52P5       | K02927 |
| ENSG00000243499 | 5.13E-15 | -2.63127 | 1 | 1 RPS6P21       | K02991 |
| ENSG00000243500 | 5.13E-15 | -2.63127 | 1 | 1 RP11-364B6.2  | -      |
| ENSG00000243501 | 5.13E-15 | -2.63127 | 1 | 1 RP11-257K9.8  | -      |
| ENSG00000243503 | 5.13E-15 | -2.63127 | 1 | 1 AC090453.1    | K02898 |
| ENSG00000243505 | 5.13E-15 | -2.63127 | 1 | 1 RN7SL240P     | -      |
| ENSG00000243507 | 5.13E-15 | -2.63127 | 1 | 1 RP11-476M19.1 | K02976 |
| ENSG00000243509 | 5.13E-15 | -2.63127 | 1 | 1 TNFRSF6B      | K05143 |
| ENSG00000243510 | 5.13E-15 | -2.63127 | 1 | 1 RN7SL111P     | -      |
| ENSG00000243514 | 5.13E-15 | -2.63127 | 1 | 1 RPL32P33      | K02912 |
| ENSG00000243516 | 5.13E-15 | -2.63127 | 1 | 1 RP11-19F9.1   | K02870 |
| ENSG00000243518 | 5.13E-15 | -2.63127 | 1 | 1 RP11-639F1.2  | -      |
| ENSG00000243519 | 5.13E-15 | -2.63127 | 1 | 1 IGLVIVOR22-2  | K06553 |
| ENSG00000243521 | 5.13E-15 | -2.63127 | 1 | 1 RPL5P33       | K02932 |

|                 |          |          |   |                 |        |
|-----------------|----------|----------|---|-----------------|--------|
| ENSG00000243531 | 5.13E-15 | -2.63127 | 1 | 1 RP11-740N7.3  | --     |
| ENSG00000243532 | 5.13E-15 | -2.63127 | 1 | 1 RN7SL19P      | --     |
| ENSG00000243536 | 5.13E-15 | -2.63127 | 1 | 1 ANTXRLP1      | --     |
| ENSG00000243537 | 5.13E-15 | -2.63127 | 1 | 1 CTC-458A3.1   | K02912 |
| ENSG00000243538 | 5.13E-15 | -2.63127 | 1 | 1 CTB-55B8.1    | K02976 |
| ENSG00000243539 | 5.13E-15 | -2.63127 | 1 | 1 RN7SL649P     | --     |
| ENSG00000243541 | 5.13E-15 | -2.63127 | 1 | 1 RN7SL104P     | --     |
| ENSG00000243543 | 5.13E-15 | -2.63127 | 1 | 1 WFDC6         | --     |
| ENSG00000243544 | 5.13E-15 | -2.63127 | 1 | 1 RN7SL172P     | --     |
| ENSG00000243546 | 5.13E-15 | -2.63127 | 1 | 1 RN7SL108P     | --     |
| ENSG00000243548 | 5.13E-15 | -2.63127 | 1 | 1 RN7SL101P     | --     |
| ENSG00000243549 | 5.13E-15 | -2.63127 | 1 | 1 RN7SL705P     | --     |
| ENSG00000243558 | 5.13E-15 | -2.63127 | 1 | 1 RP11-181G12.5 | --     |
| ENSG00000243560 | 5.13E-15 | -2.63127 | 1 | 1 RN7SL364P     | --     |
| ENSG00000243562 | 5.13E-15 | -2.63127 | 1 | 1 RN7SL838P     | --     |
| ENSG00000243568 | 5.13E-15 | -2.63127 | 1 | 1 RP11-2I17.1   | K02889 |
| ENSG00000243572 | 5.13E-15 | -2.63127 | 1 | 1 RP11-889D3.2  | --     |
| ENSG00000243574 | 5.13E-15 | -2.63127 | 1 | 1 RP11-264K23.1 | --     |
| ENSG00000243581 | 5.13E-15 | -2.63127 | 1 | 1 RPS29P25      | --     |
| ENSG00000243583 | 5.13E-15 | -2.63127 | 1 | 1 RP4-669B10.3  | --     |
| ENSG00000243584 | 5.13E-15 | -2.63127 | 1 | 1 RP11-14I2.2   | K04511 |
| ENSG00000243591 | 5.13E-15 | -2.63127 | 1 | 1 RN7SL282P     | --     |
| ENSG00000243592 | 5.13E-15 | -2.63127 | 1 | 1 RPL17P22      | K02880 |
| ENSG00000243593 | 5.13E-15 | -2.63127 | 1 | 1 RP11-500K19.1 | --     |
| ENSG00000243596 | 5.13E-15 | -2.63127 | 1 | 1 RP11-758I14.2 | --     |
| ENSG00000243601 | 5.13E-15 | -2.63127 | 1 | 1 RP11-152P17.1 | --     |
| ENSG00000243609 | 5.13E-15 | -2.63127 | 1 | 1 RPS2P44       | K02981 |
| ENSG00000243613 | 5.13E-15 | -2.63127 | 1 | 1 RP11-216N14.8 | --     |
| ENSG00000243620 | 5.13E-15 | -2.63127 | 1 | 1 RP11-649A16.1 | --     |
| ENSG00000243621 | 5.13E-15 | -2.63127 | 1 | 1 AC003989.3    | K15441 |
| ENSG00000243627 | 5.13E-15 | -2.63127 | 1 | 1 AP000322.53   | --     |
| ENSG00000243629 | 5.13E-15 | -2.63127 | 1 | 1 LINC00880     | --     |
| ENSG00000243633 | 5.13E-15 | -2.63127 | 1 | 1 RN7SL542P     | --     |
| ENSG00000243635 | 5.13E-15 | -2.63127 | 1 | 1 RP11-281P11.1 | K08007 |
| ENSG00000243641 | 5.13E-15 | -2.63127 | 1 | 1 OR13C7P       | K04257 |
| ENSG00000243642 | 5.13E-15 | -2.63127 | 1 | 1 RN7SL526P     | --     |
| ENSG00000243643 | 5.13E-15 | -2.63127 | 1 | 1 TSPY20P       | --     |
| ENSG00000243648 | 5.13E-15 | -2.63127 | 1 | 1 RP11-215P8.1  | K02947 |
| ENSG00000243654 | 5.13E-15 | -2.63127 | 1 | 1 RN7SL295P     | --     |
| ENSG00000243655 | 5.13E-15 | -2.63127 | 1 | 1 RP11-846F4.12 | --     |
| ENSG00000243658 | 5.13E-15 | -2.63127 | 1 | 1 MTND5P16      | K03883 |
| ENSG00000243659 | 5.13E-15 | -2.63127 | 1 | 1 RP11-4K3__A.3 | K12160 |
| ENSG00000243661 | 5.13E-15 | -2.63127 | 1 | 1 WBP1LP1       | --     |
| ENSG00000243663 | 5.13E-15 | -2.63127 | 1 | 1 RPS4XP14      | K02987 |
| ENSG00000243664 | 5.13E-15 | -2.63127 | 1 | 1 RPS29P12      | K02980 |
| ENSG00000243669 | 5.13E-15 | -2.63127 | 1 | 1 RPL34P23      | K02915 |
| ENSG00000243671 | 5.13E-15 | -2.63127 | 1 | 1 RN7SL761P     | --     |
| ENSG00000243674 | 5.13E-15 | -2.63127 | 1 | 1 OR7E66P       | K04257 |
| ENSG00000243675 | 5.13E-15 | -2.63127 | 1 | 1 RP11-379F4.1  | K02917 |
| ENSG00000243680 | 5.13E-15 | -2.63127 | 1 | 1 RPL37P23      | K02922 |
| ENSG00000243686 | 5.13E-15 | -2.63127 | 1 | 1 RPLP1P11      | K02942 |
| ENSG00000243687 | 5.13E-15 | -2.63127 | 1 | 1 RP11-432B6.1  | K02917 |
| ENSG00000243694 | 5.13E-15 | -2.63127 | 1 | 1 RP11-6B4.1    | --     |
| ENSG00000243695 | 5.13E-15 | -2.63127 | 1 | 1 RP11-290L7.3  | --     |
| ENSG00000243700 | 5.13E-15 | -2.63127 | 1 | 1 RN7SL598P     | --     |
| ENSG00000243702 | 5.13E-15 | -2.63127 | 1 | 1 RN7SL638P     | --     |
| ENSG00000243704 | 5.13E-15 | -2.63127 | 1 | 1 RN7SL105P     | --     |
| ENSG00000243705 | 5.13E-15 | -2.63127 | 1 | 1 RP11-178L8.1  | K02924 |

|                 |          |          |   |                 |        |
|-----------------|----------|----------|---|-----------------|--------|
| ENSG00000243711 | 5.13E-15 | -2.63127 | 1 | 1 RPL21P116     | K02889 |
| ENSG00000243714 | 5.13E-15 | -2.63127 | 1 | 1 RN7SL696P     | -      |
| ENSG00000243715 | 5.13E-15 | -2.63127 | 1 | 1 CACNA2D3-AS1  | -      |
| ENSG00000243720 | 5.13E-15 | -2.63127 | 1 | 1 RPL21P127     | K02889 |
| ENSG00000243721 | 5.13E-15 | -2.63127 | 1 | 1 RP11-472I20.1 | K02893 |
| ENSG00000243723 | 5.13E-15 | -2.63127 | 1 | 1 RN7SL393P     | -      |
| ENSG00000243729 | 5.13E-15 | -2.63127 | 1 | 1 OR5V1         | K04257 |
| ENSG00000243730 | 5.13E-15 | -2.63127 | 1 | 1 RPL29P3       | K02905 |
| ENSG00000243733 | 5.13E-15 | -2.63127 | 1 | 1 RP11-80H8.3   | -      |
| ENSG00000243744 | 5.13E-15 | -2.63127 | 1 | 1 CTC-232H10.1  | K02905 |
| ENSG00000243745 | 5.13E-15 | -2.63127 | 1 | 1 RN7SL844P     | -      |
| ENSG00000243753 | 5.13E-15 | -2.63127 | 1 | 1 HLA-L         | K06751 |
| ENSG00000243758 | 5.13E-15 | -2.63127 | 1 | 1 RPL35AP15     | K02917 |
| ENSG00000243761 | 5.13E-15 | -2.63127 | 1 | 1 RP11-216N21.2 | K02912 |
| ENSG00000243762 | 5.13E-15 | -2.63127 | 1 | 1 AC006547.8    | -      |
| ENSG00000243770 | 5.13E-15 | -2.63127 | 1 | 1 RN7SL65P      | -      |
| ENSG00000243771 | 5.13E-15 | -2.63127 | 1 | 1 CTD-3131K8.1  | K02889 |
| ENSG00000243772 | 5.13E-15 | -2.63127 | 1 | 1 KIR2DL3       | K07981 |
| ENSG00000243775 | 5.13E-15 | -2.63127 | 1 | 1 OSTCP1        | -      |
| ENSG00000243779 | 5.13E-15 | -2.63127 | 1 | 1 RP11-681N23.1 | K02929 |
| ENSG00000243780 | 5.13E-15 | -2.63127 | 1 | 1 RP11-112N19.1 | K02889 |
| ENSG00000243781 | 5.13E-15 | -2.63127 | 1 | 1 RP11-193H5.2  | K05692 |
| ENSG00000243782 | 5.13E-15 | -2.63127 | 1 | 1 RN7SL78P      | -      |
| ENSG00000243790 | 5.13E-15 | -2.63127 | 1 | 1 RN7SL485P     | -      |
| ENSG00000243792 | 5.13E-15 | -2.63127 | 1 | 1 OR7E89P       | K04257 |
| ENSG00000243794 | 5.13E-15 | -2.63127 | 1 | 1 CTD-2026G6.2  | K11095 |
| ENSG00000243799 | 5.13E-15 | -2.63127 | 1 | 1 PEX5L-AS1     | -      |
| ENSG00000243801 | 5.13E-15 | -2.63127 | 1 | 1 RN7SL461P     | -      |
| ENSG00000243802 | 5.13E-15 | -2.63127 | 1 | 1 RP11-390K5.1  | K02969 |
| ENSG00000243806 | 5.13E-15 | -2.63127 | 1 | 1 RPL7P18       | K02937 |
| ENSG00000243810 | 5.13E-15 | -2.63127 | 1 | 1 RP5-1096J16.1 | -      |
| ENSG00000243813 | 5.13E-15 | -2.63127 | 1 | 1 RP11-678L1.1  | K09228 |
| ENSG00000243817 | 5.13E-15 | -2.63127 | 1 | 1 RN7SL189P     | -      |
| ENSG00000243818 | 5.13E-15 | -2.63127 | 1 | 1 RP11-372E1.4  | -      |
| ENSG00000243822 | 5.13E-15 | -2.63127 | 1 | 1 RP11-2G17.1   | K02975 |
| ENSG00000243828 | 5.13E-15 | -2.63127 | 1 | 1 RP11-307F22.2 | -      |
| ENSG00000243830 | 5.13E-15 | -2.63127 | 1 | 1 RP11-113C12.2 | K02877 |
| ENSG00000243831 | 5.13E-15 | -2.63127 | 1 | 1 RP1-81D8.4    | K01315 |
| ENSG00000243832 | 5.13E-15 | -2.63127 | 1 | 1 RP11-202A13.1 | -      |
| ENSG00000243836 | 5.13E-15 | -2.63127 | 1 | 1 WDR86-AS1     | -      |
| ENSG00000243838 | 5.13E-15 | -2.63127 | 1 | 1 PSMC1P7       | K03062 |
| ENSG00000243844 | 5.13E-15 | -2.63127 | 1 | 1 RPL17P33      | K02880 |
| ENSG00000243845 | 5.13E-15 | -2.63127 | 1 | 1 RN7SL30P      | -      |
| ENSG00000243847 | 5.13E-15 | -2.63127 | 1 | 1 RN7SL610P     | -      |
| ENSG00000243853 | 5.13E-15 | -2.63127 | 1 | 1 ALDH7A1P3     | K14085 |
| ENSG00000243854 | 5.13E-15 | -2.63127 | 1 | 1 RN7SL67P      | -      |
| ENSG00000243855 | 5.13E-15 | -2.63127 | 1 | 1 RP11-114O13.1 | K02870 |
| ENSG00000243856 | 5.13E-15 | -2.63127 | 1 | 1 RN7SL551P     | -      |
| ENSG00000243861 | 5.13E-15 | -2.63127 | 1 | 1 RP11-656A15.1 | -      |
| ENSG00000243864 | 5.13E-15 | -2.63127 | 1 | 1 RPS3AP50      | K02984 |
| ENSG00000243869 | 5.13E-15 | -2.63127 | 1 | 1 RN7SL56P      | -      |
| ENSG00000243872 | 5.13E-15 | -2.63127 | 1 | 1 RN7SL464P     | -      |
| ENSG00000243873 | 5.13E-15 | -2.63127 | 1 | 1 HMGB1P36      | K10802 |
| ENSG00000243877 | 5.13E-15 | -2.63127 | 1 | 1 HMGB1P38      | K10802 |
| ENSG00000243883 | 5.13E-15 | -2.63127 | 1 | 1 RN7SL419P     | -      |
| ENSG00000243886 | 5.13E-15 | -2.63127 | 1 | 1 RP11-575C1.1  | K17885 |
| ENSG00000243888 | 5.13E-15 | -2.63127 | 1 | 1 RP11-548B3.3  | -      |
| ENSG00000243889 | 5.13E-15 | -2.63127 | 1 | 1 TRBV8-1       | -      |

|                 |          |          |   |                  |        |
|-----------------|----------|----------|---|------------------|--------|
| ENSG00000243894 | 5.13E-15 | -2.63127 | 1 | 1 RP11-489M13.1  | K02984 |
| ENSG00000243899 | 5.13E-15 | -2.63127 | 1 | 1 BMS1P7         | K14569 |
| ENSG00000243900 | 5.13E-15 | -2.63127 | 1 | 1 RN7SL320P      | -      |
| ENSG00000243903 | 5.13E-15 | -2.63127 | 1 | 1 RP11-285B24.1  | -      |
| ENSG00000243904 | 5.13E-15 | -2.63127 | 1 | 1 RP11-600F24.1  | K02998 |
| ENSG00000243905 | 5.13E-15 | -2.63127 | 1 | 1 RN7SL679P      | -      |
| ENSG00000243911 | 5.13E-15 | -2.63127 | 1 | 1 RN7SL430P      | -      |
| ENSG00000243914 | 5.13E-15 | -2.63127 | 1 | 1 RPL5P14        | K02932 |
| ENSG00000243915 | 5.13E-15 | -2.63127 | 1 | 1 PRKRIRP2       | -      |
| ENSG00000243916 | 5.13E-15 | -2.63127 | 1 | 1 RP11-6K23.1    | K02981 |
| ENSG00000243918 | 5.13E-15 | -2.63127 | 1 | 1 EIF4BP8        | K03258 |
| ENSG00000243920 | 5.13E-15 | -2.63127 | 1 | 1 RPS26P24       | -      |
| ENSG00000243925 | 5.13E-15 | -2.63127 | 1 | 1 RPS24P18       | K02974 |
| ENSG00000243928 | 5.13E-15 | -2.63127 | 1 | 1 RN7SL628P      | -      |
| ENSG00000243929 | 5.13E-15 | -2.63127 | 1 | 1 RP11-61F5.1    | K02921 |
| ENSG00000243930 | 5.13E-15 | -2.63127 | 1 | 1 RPS12P21       | K02951 |
| ENSG00000243935 | 5.13E-15 | -2.63127 | 1 | 1 RP11-100J16.5  | K09228 |
| ENSG00000243939 | 5.13E-15 | -2.63127 | 1 | 1 RP11-200A13.1  | -      |
| ENSG00000243944 | 5.13E-15 | -2.63127 | 1 | 1 RP11-167H9.4   | -      |
| ENSG00000243945 | 5.13E-15 | -2.63127 | 1 | 1 RP11-696F10.1  | -      |
| ENSG00000243951 | 5.13E-15 | -2.63127 | 1 | 1 RN7SL308P      | -      |
| ENSG00000243953 | 5.13E-15 | -2.63127 | 1 | 1 RP11-439C8.2   | -      |
| ENSG00000243954 | 5.13E-15 | -2.63127 | 1 | 1 RN7SL743P      | -      |
| ENSG00000243955 | 5.13E-15 | -2.63127 | 1 | 1 GSTA1          | K00799 |
| ENSG00000243957 | 5.13E-15 | -2.63127 | 1 | 1 RN7SL647P      | -      |
| ENSG00000243967 | 5.13E-15 | -2.63127 | 1 | 1 NBPF5P         | -      |
| ENSG00000243968 | 5.13E-15 | -2.63127 | 1 | 1 RN7SL402P      | -      |
| ENSG00000243969 | 5.13E-15 | -2.63127 | 1 | 1 RP11-439C8.1   | -      |
| ENSG00000243974 | 5.13E-15 | -2.63127 | 1 | 1 VTI1BP1        | K08493 |
| ENSG00000243976 | 5.13E-15 | -2.63127 | 1 | 1 RN7SL523P      | -      |
| ENSG00000243980 | 5.13E-15 | -2.63127 | 1 | 1 RN7SL702P      | -      |
| ENSG00000243981 | 5.13E-15 | -2.63127 | 1 | 1 RP11-368M16.3  | -      |
| ENSG00000243986 | 5.13E-15 | -2.63127 | 1 | 1 ENO1P3         | K01689 |
| ENSG00000243991 | 5.13E-15 | -2.63127 | 1 | 1 RN7SL447P      | -      |
| ENSG00000243993 | 5.13E-15 | -2.63127 | 1 | 1 RP11-14D22.2   | -      |
| ENSG00000243995 | 5.13E-15 | -2.63127 | 1 | 1 RP1-300I2.2    | -      |
| ENSG00000244000 | 5.13E-15 | -2.63127 | 1 | 1 AC006366.3     | K09228 |
| ENSG00000244002 | 5.13E-15 | -2.63127 | 1 | 1 RP11-162K6.1   | K02998 |
| ENSG00000244003 | 5.13E-15 | -2.63127 | 1 | 1 RN7SL143P      | -      |
| ENSG00000244004 | 5.13E-15 | -2.63127 | 1 | 1 RP11-1396O13.2 | K02984 |
| ENSG00000244006 | 5.13E-15 | -2.63127 | 1 | 1 RN7SL799P      | -      |
| ENSG00000244009 | 5.13E-15 | -2.63127 | 1 | 1 RP11-227J5.3   | K10158 |
| ENSG00000244019 | 5.13E-15 | -2.63127 | 1 | 1 RPS2P24        | K02981 |
| ENSG00000244020 | 5.13E-15 | -2.63127 | 1 | 1 MT1HL1         | K14739 |
| ENSG00000244024 | 5.13E-15 | -2.63127 | 1 | 1 RP11-622L21.1  | K15191 |
| ENSG00000244025 | 5.13E-15 | -2.63127 | 1 | 1 KRTAP19-3      | -      |
| ENSG00000244030 | 5.13E-15 | -2.63127 | 1 | 1 AC090939.1     | -      |
| ENSG00000244031 | 5.13E-15 | -2.63127 | 1 | 1 RPS3AP17       | K02984 |
| ENSG00000244033 | 5.13E-15 | -2.63127 | 1 | 1 RN7SL228P      | -      |
| ENSG00000244034 | 5.13E-15 | -2.63127 | 1 | 1 RN7SL424P      | -      |
| ENSG00000244036 | 5.13E-15 | -2.63127 | 1 | 1 RP11-306G20.1  | -      |
| ENSG00000244039 | 5.13E-15 | -2.63127 | 1 | 1 RP11-379K17.2  | -      |
| ENSG00000244043 | 5.13E-15 | -2.63127 | 1 | 1 RPS27P27       | K02978 |
| ENSG00000244044 | 5.13E-15 | -2.63127 | 1 | 1 RN7SL735P      | -      |
| ENSG00000244048 | 5.13E-15 | -2.63127 | 1 | 1 RPS18P6        | K02964 |
| ENSG00000244050 | 5.13E-15 | -2.63127 | 1 | 1 RP11-266K4.1   | -      |
| ENSG00000244052 | 5.13E-15 | -2.63127 | 1 | 1 RPL5P24        | K02932 |
| ENSG00000244053 | 5.13E-15 | -2.63127 | 1 | 1 RPL13AP2       | K02872 |

|                 |          |          |   |                 |        |
|-----------------|----------|----------|---|-----------------|--------|
| ENSG00000244056 | 5.13E-15 | -2.63127 | 1 | 1 RN7SL417P     | -      |
| ENSG00000244057 | 5.13E-15 | -2.63127 | 1 | 1 LCE3C         | -      |
| ENSG00000244060 | 5.13E-15 | -2.63127 | 1 | 1 RPS2P41       | K02981 |
| ENSG00000244062 | 5.13E-15 | -2.63127 | 1 | 1 RP11-404G16.2 | K01897 |
| ENSG00000244065 | 5.13E-15 | -2.63127 | 1 | 1 RP11-221E20.5 | -      |
| ENSG00000244066 | 5.13E-15 | -2.63127 | 1 | 1 RN7SL148P     | -      |
| ENSG00000244067 | 5.13E-15 | -2.63127 | 1 | 1 GSTA2         | K00799 |
| ENSG00000244071 | 5.13E-15 | -2.63127 | 1 | 1 RPL9P33       | -      |
| ENSG00000244076 | 5.13E-15 | -2.63127 | 1 | 1 CTC-512J14.1  | K02924 |
| ENSG00000244078 | 5.13E-15 | -2.63127 | 1 | 1 RP11-431I8.1  | -      |
| ENSG00000244080 | 5.13E-15 | -2.63127 | 1 | 1 RN7SL833P     | -      |
| ENSG00000244081 | 5.13E-15 | -2.63127 | 1 | 1 RP11-350D23.4 | K12019 |
| ENSG00000244083 | 5.13E-15 | -2.63127 | 1 | 1 RP11-170N16.1 | K02915 |
| ENSG00000244086 | 5.13E-15 | -2.63127 | 1 | 1 RPS20P35      | K02969 |
| ENSG00000244088 | 5.13E-15 | -2.63127 | 1 | 1 RP11-510I6.1  | K02893 |
| ENSG00000244089 | 5.13E-15 | -2.63127 | 1 | 1 HMGB1P30      | K10802 |
| ENSG00000244091 | 5.13E-15 | -2.63127 | 1 | 1 RN7SL483P     | -      |
| ENSG00000244094 | 5.13E-15 | -2.63127 | 1 | 1 SPRR2F        | -      |
| ENSG00000244099 | 5.13E-15 | -2.63127 | 1 | 1 RPS23P3       | K02973 |
| ENSG00000244101 | 5.13E-15 | -2.63127 | 1 | 1 HMGNI1P10     | K04613 |
| ENSG00000244107 | 5.13E-15 | -2.63127 | 1 | 1 RN7SL250P     | -      |
| ENSG00000244112 | 5.13E-15 | -2.63127 | 1 | 1 RN7SL508P     | -      |
| ENSG00000244113 | 5.13E-15 | -2.63127 | 1 | 1 RP11-468H14.1 | K02940 |
| ENSG00000244115 | 5.13E-15 | -2.63127 | 1 | 1 DNAJC25-GNG10 | K19371 |
| ENSG00000244116 | 5.13E-15 | -2.63127 | 1 | 1 IGKV2-28      | -      |
| ENSG00000244125 | 5.13E-15 | -2.63127 | 1 | 1 AC078882.1    | -      |
| ENSG00000244130 | 5.13E-15 | -2.63127 | 1 | 1 UBE2Q2P9      | K10582 |
| ENSG00000244139 | 5.13E-15 | -2.63127 | 1 | 1 RN7SL397P     | -      |
| ENSG00000244142 | 5.13E-15 | -2.63127 | 1 | 1 ATP6V0CP2     | K02155 |
| ENSG00000244144 | 5.13E-15 | -2.63127 | 1 | 1 RP11-757F18.3 | -      |
| ENSG00000244146 | 5.13E-15 | -2.63127 | 1 | 1 RP11-366M4.2  | K02898 |
| ENSG00000244152 | 5.13E-15 | -2.63127 | 1 | 1 RN7SL59P      | -      |
| ENSG00000244153 | 5.13E-15 | -2.63127 | 1 | 1 WWP1P1        | K05633 |
| ENSG00000244155 | 5.13E-15 | -2.63127 | 1 | 1 CYP4F34P      | -      |
| ENSG00000244157 | 5.13E-15 | -2.63127 | 1 | 1 RP11-190P13.1 | K03259 |
| ENSG00000244158 | 5.13E-15 | -2.63127 | 1 | 1 RP1-93H18.6   | -      |
| ENSG00000244167 | 5.13E-15 | -2.63127 | 1 | 1 RP4-733B9.1   | K14557 |
| ENSG00000244169 | 5.13E-15 | -2.63127 | 1 | 1 RN7SL120P     | -      |
| ENSG00000244183 | 5.13E-15 | -2.63127 | 1 | 1 RP11-641C17.1 | K03767 |
| ENSG00000244192 | 5.13E-15 | -2.63127 | 1 | 1 RP11-114H7.1  | K02868 |
| ENSG00000244193 | 5.13E-15 | -2.63127 | 1 | 1 RP11-379K17.5 | K14365 |
| ENSG00000244194 | 5.13E-15 | -2.63127 | 1 | 1 RN7SL218P     | -      |
| ENSG00000244196 | 5.13E-15 | -2.63127 | 1 | 1 PPIAP15       | K03767 |
| ENSG00000244197 | 5.13E-15 | -2.63127 | 1 | 1 RN7SL766P     | -      |
| ENSG00000244199 | 5.13E-15 | -2.63127 | 1 | 1 RP11-139K4.4  | K03259 |
| ENSG00000244203 | 5.13E-15 | -2.63127 | 1 | 1 FOXP1-AS1     | -      |
| ENSG00000244211 | 5.13E-15 | -2.63127 | 1 | 1 PDZK1P2       | -      |
| ENSG00000244213 | 5.13E-15 | -2.63127 | 1 | 1 ZFAND6P1      | K01555 |
| ENSG00000244214 | 5.13E-15 | -2.63127 | 1 | 1 RP11-298O21.7 | -      |
| ENSG00000244215 | 5.13E-15 | -2.63127 | 1 | 1 RP11-88I21.2  | -      |
| ENSG00000244217 | 5.13E-15 | -2.63127 | 1 | 1 RPS4XP10      | K02987 |
| ENSG00000244222 | 5.13E-15 | -2.63127 | 1 | 1 OR7E121P      | K04257 |
| ENSG00000244226 | 5.13E-15 | -2.63127 | 1 | 1 ILF2P1        | K13089 |
| ENSG00000244227 | 5.13E-15 | -2.63127 | 1 | 1 RP11-298O21.5 | -      |
| ENSG00000244229 | 5.13E-15 | -2.63127 | 1 | 1 RPL26P35      | K02898 |
| ENSG00000244230 | 5.13E-15 | -2.63127 | 1 | 1 RN7SL151P     | -      |
| ENSG00000244231 | 5.13E-15 | -2.63127 | 1 | 1 CSPG4P2Y      | -      |
| ENSG00000244232 | 5.13E-15 | -2.63127 | 1 | 1 RN7SL698P     | -      |

|                 |          |          |   |                  |        |
|-----------------|----------|----------|---|------------------|--------|
| ENSG00000244234 | 5.13E-15 | -2.63127 | 1 | 1 GMCL1P1        | K10485 |
| ENSG00000244235 | 5.13E-15 | -2.63127 | 1 | 1 RP11-589C21.1  | -      |
| ENSG00000244237 | 5.13E-15 | -2.63127 | 1 | 1 RP11-1046B16.1 | K02896 |
| ENSG00000244239 | 5.13E-15 | -2.63127 | 1 | 1 AC007009.1     | -      |
| ENSG00000244244 | 5.13E-15 | -2.63127 | 1 | 1 RPS3AP42       | K02984 |
| ENSG00000244245 | 5.13E-15 | -2.63127 | 1 | 1 RP11-120B7.1   | K02969 |
| ENSG00000244246 | 5.13E-15 | -2.63127 | 1 | 1 ZNF736P8Y      | K09228 |
| ENSG00000244247 | 5.13E-15 | -2.63127 | 1 | 1 RP11-139K4.2   | -      |
| ENSG00000244249 | 5.13E-15 | -2.63127 | 1 | 1 RP11-441M10.1  | K02981 |
| ENSG00000244251 | 5.13E-15 | -2.63127 | 1 | 1 RP11-64K12.1   | K02940 |
| ENSG00000244252 | 5.13E-15 | -2.63127 | 1 | 1 RP11-495P10.7  | -      |
| ENSG00000244253 | 5.13E-15 | -2.63127 | 1 | 1 RPS29P24       | -      |
| ENSG00000244255 | 5.13E-15 | -2.63127 | 1 | 1 CFB            | K01335 |
| ENSG00000244259 | 5.13E-15 | -2.63127 | 1 | 1 AP000797.1     | K02877 |
| ENSG00000244260 | 5.13E-15 | -2.63127 | 1 | 1 RP11-521D12.2  | -      |
| ENSG00000244264 | 5.13E-15 | -2.63127 | 1 | 1 RN7SL597P      | -      |
| ENSG00000244266 | 5.13E-15 | -2.63127 | 1 | 1 RP11-112N23.1  | K02898 |
| ENSG00000244267 | 5.13E-15 | -2.63127 | 1 | 1 RPL34P22       | K02915 |
| ENSG00000244270 | 5.13E-15 | -2.63127 | 1 | 1 RPL32P29       | -      |
| ENSG00000244273 | 5.13E-15 | -2.63127 | 1 | 1 PGBD4P1        | -      |
| ENSG00000244278 | 5.13E-15 | -2.63127 | 1 | 1 AP000235.3     | -      |
| ENSG00000244281 | 5.13E-15 | -2.63127 | 1 | 1 RP11-564P9.1   | -      |
| ENSG00000244283 | 5.13E-15 | -2.63127 | 1 | 1 RPL23AP73      | K02893 |
| ENSG00000244286 | 5.13E-15 | -2.63127 | 1 | 1 ITGB5-AS1      | -      |
| ENSG00000244289 | 5.13E-15 | -2.63127 | 1 | 1 RPS3AP35       | K02984 |
| ENSG00000244292 | 5.13E-15 | -2.63127 | 1 | 1 OR9N1P         | -      |
| ENSG00000244294 | 5.13E-15 | -2.63127 | 1 | 1 RN7SL740P      | -      |
| ENSG00000244295 | 5.13E-15 | -2.63127 | 1 | 1 RPS20P21       | K02969 |
| ENSG00000244296 | 5.13E-15 | -2.63127 | 1 | 1 RN7SL168P      | -      |
| ENSG00000244297 | 5.13E-15 | -2.63127 | 1 | 1 RN7SL465P      | -      |
| ENSG00000244301 | 5.13E-15 | -2.63127 | 1 | 1 AOX3P          | K00157 |
| ENSG00000244302 | 5.13E-15 | -2.63127 | 1 | 1 PEX5L-AS2      | -      |
| ENSG00000244308 | 5.13E-15 | -2.63127 | 1 | 1 RN7SL762P      | -      |
| ENSG00000244310 | 5.13E-15 | -2.63127 | 1 | 1 RP11-734K21.3  | -      |
| ENSG00000244314 | 5.13E-15 | -2.63127 | 1 | 1 RN7SL36P       | -      |
| ENSG00000244318 | 5.13E-15 | -2.63127 | 1 | 1 RN7SL252P      | -      |
| ENSG00000244321 | 5.13E-15 | -2.63127 | 1 | 1 RP11-450H5.1   | -      |
| ENSG00000244326 | 5.13E-15 | -2.63127 | 1 | 1 RN7SL814P      | -      |
| ENSG00000244328 | 5.13E-15 | -2.63127 | 1 | 1 RN7SL845P      | -      |
| ENSG00000244329 | 5.13E-15 | -2.63127 | 1 | 1 UBA52P9        | -      |
| ENSG00000244331 | 5.13E-15 | -2.63127 | 1 | 1 CTB-47B8.1     | K02943 |
| ENSG00000244335 | 5.13E-15 | -2.63127 | 1 | 1 RN7SL687P      | -      |
| ENSG00000244337 | 5.13E-15 | -2.63127 | 1 | 1 AJ239322.3     | -      |
| ENSG00000244342 | 5.13E-15 | -2.63127 | 1 | 1 LINC00698      | -      |
| ENSG00000244345 | 5.13E-15 | -2.63127 | 1 | 1 RP11-654C22.2  | -      |
| ENSG00000244346 | 5.13E-15 | -2.63127 | 1 | 1 RP11-531F16.3  | K04613 |
| ENSG00000244349 | 5.13E-15 | -2.63127 | 1 | 1 HCG16          | -      |
| ENSG00000244355 | 5.13E-15 | -2.63127 | 1 | 1 LY6G6D         | K06846 |
| ENSG00000244356 | 5.13E-15 | -2.63127 | 1 | 1 RN7SL398P      | -      |
| ENSG00000244357 | 5.13E-15 | -2.63127 | 1 | 1 RN7SL145P      | -      |
| ENSG00000244358 | 5.13E-15 | -2.63127 | 1 | 1 RP11-88H10.2   | -      |
| ENSG00000244361 | 5.13E-15 | -2.63127 | 1 | 1 RPL30P7        | K02908 |
| ENSG00000244362 | 5.13E-15 | -2.63127 | 1 | 1 KRTAP19-7      | -      |
| ENSG00000244371 | 5.13E-15 | -2.63127 | 1 | 1 PFN1P8         | K05759 |
| ENSG00000244372 | 5.13E-15 | -2.63127 | 1 | 1 RN7SL423P      | -      |
| ENSG00000244376 | 5.13E-15 | -2.63127 | 1 | 1 RN7SL636P      | -      |
| ENSG00000244380 | 5.13E-15 | -2.63127 | 1 | 1 RP11-24C3.2    | -      |
| ENSG00000244381 | 5.13E-15 | -2.63127 | 1 | 1 RP11-3K16.1    | K00237 |



|                 |          |          |   |                 |        |
|-----------------|----------|----------|---|-----------------|--------|
| ENSG00000244382 | 5.13E-15 | -2.63127 | 1 | 1 RP11-373I8.1  | -      |
| ENSG00000244383 | 5.13E-15 | -2.63127 | 1 | 1 RP11-475O23.3 | -      |
| ENSG00000244384 | 5.13E-15 | -2.63127 | 1 | 1 RN7SL359P     | -      |
| ENSG00000244389 | 5.13E-15 | -2.63127 | 1 | 1 RN7SL242P     | -      |
| ENSG00000244390 | 5.13E-15 | -2.63127 | 1 | 1 RPS6P22       | K02991 |
| ENSG00000244391 | 5.13E-15 | -2.63127 | 1 | 1 RN7SL330P     | -      |
| ENSG00000244392 | 5.13E-15 | -2.63127 | 1 | 1 RN7SL869P     | -      |
| ENSG00000244395 | 5.13E-15 | -2.63127 | 1 | 1 RBMY1D        | K12885 |
| ENSG00000244400 | 5.13E-15 | -2.63127 | 1 | 1 RPS4XP12      | -      |
| ENSG00000244402 | 5.13E-15 | -2.63127 | 1 | 1 RN7SL314P     | -      |
| ENSG00000244404 | 5.13E-15 | -2.63127 | 1 | 1 RN7SL216P     | -      |
| ENSG00000244411 | 5.13E-15 | -2.63127 | 1 | 1 KRTAP5-7      | -      |
| ENSG00000244413 | 5.13E-15 | -2.63127 | 1 | 1 RP11-1057B8.1 | K02893 |
| ENSG00000244414 | 5.13E-15 | -2.63127 | 1 | 1 CFHR1         | K04004 |
| ENSG00000244422 | 5.13E-15 | -2.63127 | 1 | 1 RPL38P3       | K02923 |
| ENSG00000244424 | 5.13E-15 | -2.63127 | 1 | 1 RN7SL829P     | -      |
| ENSG00000244425 | 5.13E-15 | -2.63127 | 1 | 1 RN7SL268P     | -      |
| ENSG00000244427 | 5.13E-15 | -2.63127 | 1 | 1 RP11-52B19.1  | K02984 |
| ENSG00000244429 | 5.13E-15 | -2.63127 | 1 | 1 RP11-12N13.1  | K11090 |
| ENSG00000244432 | 5.13E-15 | -2.63127 | 1 | 1 RPL39P28      | K02924 |
| ENSG00000244433 | 5.13E-15 | -2.63127 | 1 | 1 PGBD4P7       | K15299 |
| ENSG00000244436 | 5.13E-15 | -2.63127 | 1 | 1 RP11-428G5.1  | -      |
| ENSG00000244437 | 5.13E-15 | -2.63127 | 1 | 1 IGKV3-15      | -      |
| ENSG00000244438 | 5.13E-15 | -2.63127 | 1 | 1 RN7SL327P     | -      |
| ENSG00000244451 | 5.13E-15 | -2.63127 | 1 | 1 RPL34P21      | K02915 |
| ENSG00000244456 | 5.13E-15 | -2.63127 | 1 | 1 AC090774.2    | -      |
| ENSG00000244457 | 5.13E-15 | -2.63127 | 1 | 1 ENO1P1        | K01689 |
| ENSG00000244461 | 5.13E-15 | -2.63127 | 1 | 1 RP11-354H21.1 | -      |
| ENSG00000244464 | 5.13E-15 | -2.63127 | 1 | 1 RP11-201E8.1  | -      |
| ENSG00000244470 | 5.13E-15 | -2.63127 | 1 | 1 RP11-395M19.1 | K02934 |
| ENSG00000244471 | 5.13E-15 | -2.63127 | 1 | 1 RP11-78J21.4  | -      |
| ENSG00000244474 | 5.13E-15 | -2.63127 | 1 | 1 UGT1A4        | K00699 |
| ENSG00000244482 | 5.13E-15 | -2.63127 | 1 | 1 LILRA6        | K06512 |
| ENSG00000244485 | 5.13E-15 | -2.63127 | 1 | 1 RPL18P13      | K02883 |
| ENSG00000244493 | 5.13E-15 | -2.63127 | 1 | 1 SLC9A9-AS2    | -      |
| ENSG00000244501 | 5.13E-15 | -2.63127 | 1 | 1 RN7SL623P     | -      |
| ENSG00000244502 | 5.13E-15 | -2.63127 | 1 | 1 HDAC11-AS1    | -      |
| ENSG00000244503 | 5.13E-15 | -2.63127 | 1 | 1 RP11-278L15.6 | K03231 |
| ENSG00000244510 | 5.13E-15 | -2.63127 | 1 | 1 GS1-124K5.7   | K03121 |
| ENSG00000244512 | 5.13E-15 | -2.63127 | 1 | 1 RN7SL28P      | -      |
| ENSG00000244514 | 5.13E-15 | -2.63127 | 1 | 1 RN7SL125P     | -      |
| ENSG00000244521 | 5.13E-15 | -2.63127 | 1 | 1 RN7SL700P     | -      |
| ENSG00000244522 | 5.13E-15 | -2.63127 | 1 | 1 AC092669.1    | -      |
| ENSG00000244528 | 5.13E-15 | -2.63127 | 1 | 1 AC134873.1    | K16941 |
| ENSG00000244532 | 5.13E-15 | -2.63127 | 1 | 1 RN7SL380P     | -      |
| ENSG00000244534 | 5.13E-15 | -2.63127 | 1 | 1 RN7SL211P     | -      |
| ENSG00000244537 | 5.13E-15 | -2.63127 | 1 | 1 KRTAP4-2      | -      |
| ENSG00000244538 | 5.13E-15 | -2.63127 | 1 | 1 RP11-10G12.1  | K02978 |
| ENSG00000244540 | 5.13E-15 | -2.63127 | 1 | 1 RP11-416A17.1 | K02917 |
| ENSG00000244541 | 5.13E-15 | -2.63127 | 1 | 1 RP11-167H9.6  | -      |
| ENSG00000244544 | 5.13E-15 | -2.63127 | 1 | 1 RN7SL446P     | -      |
| ENSG00000244545 | 5.13E-15 | -2.63127 | 1 | 1 RP11-788A4.1  | -      |
| ENSG00000244550 | 5.13E-15 | -2.63127 | 1 | 1 RP5-905H7.3   | -      |
| ENSG00000244551 | 5.13E-15 | -2.63127 | 1 | 1 RPL34P29      | -      |
| ENSG00000244559 | 5.13E-15 | -2.63127 | 1 | 1 CTD-2377D24.2 | K02940 |
| ENSG00000244561 | 5.13E-15 | -2.63127 | 1 | 1 RP11-702L6.1  | -      |
| ENSG00000244563 | 5.13E-15 | -2.63127 | 1 | 1 AC006011.4    | -      |
| ENSG00000244564 | 5.13E-15 | -2.63127 | 1 | 1 RP11-14D22.1  | -      |

|                 |          |          |   |                  |        |
|-----------------|----------|----------|---|------------------|--------|
| ENSG00000244565 | 5.13E-15 | -2.63127 | 1 | 1 RP11-222O23.1  | K03012 |
| ENSG00000244568 | 5.13E-15 | -2.63127 | 1 | 1 RN7SL654P      | -      |
| ENSG00000244571 | 5.13E-15 | -2.63127 | 1 | 1 RP11-535I24.2  | K02991 |
| ENSG00000244573 | 5.13E-15 | -2.63127 | 1 | 1 RPL30P11       | K02908 |
| ENSG00000244575 | 5.13E-15 | -2.63127 | 1 | 1 IGKV1-27       | -      |
| ENSG00000244582 | 5.13E-15 | -2.63127 | 1 | 1 RPL21P120      | K02889 |
| ENSG00000244585 | 5.13E-15 | -2.63127 | 1 | 1 RPL12P33       | K02870 |
| ENSG00000244593 | 5.13E-15 | -2.63127 | 1 | 1 RP11-685B14.1  | K02865 |
| ENSG00000244604 | 5.13E-15 | -2.63127 | 1 | 1 RP11-713H12.1  | K02976 |
| ENSG00000244609 | 5.13E-15 | -2.63127 | 1 | 1 RN7SL532P      | -      |
| ENSG00000244612 | 5.13E-15 | -2.63127 | 1 | 1 RN7SL429P      | -      |
| ENSG00000244615 | 5.13E-15 | -2.63127 | 1 | 1 PSPC1P2        | -      |
| ENSG00000244619 | 5.13E-15 | -2.63127 | 1 | 1 RP11-315I20.3  | -      |
| ENSG00000244620 | 5.13E-15 | -2.63127 | 1 | 1 AL122127.25    | -      |
| ENSG00000244621 | 5.13E-15 | -2.63127 | 1 | 1 RPS17P11       | K02962 |
| ENSG00000244623 | 5.13E-15 | -2.63127 | 1 | 1 OR2AE1         | K04257 |
| ENSG00000244624 | 5.13E-15 | -2.63127 | 1 | 1 KRTAP20-1      | -      |
| ENSG00000244630 | 5.13E-15 | -2.63127 | 1 | 1 RP11-241J12.1  | -      |
| ENSG00000244632 | 5.13E-15 | -2.63127 | 1 | 1 RN7SL863P      | -      |
| ENSG00000244640 | 5.13E-15 | -2.63127 | 1 | 1 RP11-436J20.1  | K02941 |
| ENSG00000244641 | 5.13E-15 | -2.63127 | 1 | 1 RPS26P43       | K02976 |
| ENSG00000244642 | 5.13E-15 | -2.63127 | 1 | 1 RN7SL396P      | -      |
| ENSG00000244646 | 5.13E-15 | -2.63127 | 1 | 1 AC024183.3     | -      |
| ENSG00000244649 | 5.13E-15 | -2.63127 | 1 | 1 CTD-2377D24.6  | -      |
| ENSG00000244650 | 5.13E-15 | -2.63127 | 1 | 1 RP11-501O2.3   | -      |
| ENSG00000244652 | 5.13E-15 | -2.63127 | 1 | 1 RP11-93B21.1   | -      |
| ENSG00000244653 | 5.13E-15 | -2.63127 | 1 | 1 UBFD1P1        | -      |
| ENSG00000244657 | 5.13E-15 | -2.63127 | 1 | 1 GS1-124K5.8    | K03121 |
| ENSG00000244661 | 5.13E-15 | -2.63127 | 1 | 1 TRBV12-1       | -      |
| ENSG00000244662 | 5.13E-15 | -2.63127 | 1 | 1 RP11-615I16.1  | K02889 |
| ENSG00000244666 | 5.13E-15 | -2.63127 | 1 | 1 RN7SL853P      | -      |
| ENSG00000244668 | 5.13E-15 | -2.63127 | 1 | 1 RP11-103G8.1   | K11095 |
| ENSG00000244669 | 5.13E-15 | -2.63127 | 1 | 1 RP11-158O16.1  | K02991 |
| ENSG00000244671 | 5.13E-15 | -2.63127 | 1 | 1 RN7SL280P      | -      |
| ENSG00000244674 | 5.13E-15 | -2.63127 | 1 | 1 RPS3AP15       | K02984 |
| ENSG00000244676 | 5.13E-15 | -2.63127 | 1 | 1 AL109761.5     | -      |
| ENSG00000244681 | 5.13E-15 | -2.63127 | 1 | 1 MTHFD2P1       | K13403 |
| ENSG00000244682 | 5.13E-15 | -2.63127 | 1 | 1 FCGR2C         | K16824 |
| ENSG00000244692 | 5.13E-15 | -2.63127 | 1 | 1 RN7SL724P      | -      |
| ENSG00000244694 | 5.13E-15 | -2.63127 | 1 | 1 PTCHD4         | K17985 |
| ENSG00000244699 | 5.13E-15 | -2.63127 | 1 | 1 RP11-803B1.2   | -      |
| ENSG00000244703 | 5.13E-15 | -2.63127 | 1 | 1 CD46P1         | K04007 |
| ENSG00000244705 | 5.13E-15 | -2.63127 | 1 | 1 RP11-133K1.1   | K02941 |
| ENSG00000244706 | 5.13E-15 | -2.63127 | 1 | 1 RP11-298O21.3  | -      |
| ENSG00000244708 | 5.13E-15 | -2.63127 | 1 | 1 RPL23P10       | -      |
| ENSG00000244710 | 5.13E-15 | -2.63127 | 1 | 1 RN7SL47P       | -      |
| ENSG00000244712 | 5.13E-15 | -2.63127 | 1 | 1 RP11-874G11.1  | K02905 |
| ENSG00000244717 | 5.13E-15 | -2.63127 | 1 | 1 RPS27P14       | K02978 |
| ENSG00000244720 | 5.13E-15 | -2.63127 | 1 | 1 RP11-402J7.2   | K01081 |
| ENSG00000244722 | 5.13E-15 | -2.63127 | 1 | 1 RP11-179A18.1  | K02998 |
| ENSG00000244730 | 5.13E-15 | -2.63127 | 1 | 1 RP13-1056D16.2 | K12834 |
| ENSG00000244731 | 5.13E-15 | -2.63127 | 1 | 1 C4A            | K03989 |
| ENSG00000244732 | 5.13E-15 | -2.63127 | 1 | 1 RN7SL870P      | -      |
| ENSG00000244734 | 5.13E-15 | -2.63127 | 1 | 1 HBB            | K13823 |
| ENSG00000244736 | 5.13E-15 | -2.63127 | 1 | 1 RN7SL495P      | -      |
| ENSG00000244738 | 5.13E-15 | -2.63127 | 1 | 1 RP11-373E16.3  | -      |
| ENSG00000244740 | 5.13E-15 | -2.63127 | 1 | 1 RP11-463H24.1  | K02910 |
| ENSG00000244743 | 5.13E-15 | -2.63127 | 1 | 1 RP11-8P13.1    | K02917 |

|                 |          |          |   |                  |        |
|-----------------|----------|----------|---|------------------|--------|
| ENSG00000244748 | 5.13E-15 | -2.63127 | 1 | 1 RN7SL153P      | -      |
| ENSG00000244753 | 5.13E-15 | -2.63127 | 1 | 1 RPL15P21       | K02877 |
| ENSG00000244756 | 5.13E-15 | -2.63127 | 1 | 1 RP11-1042B17.1 | K02922 |
| ENSG00000244757 | 5.13E-15 | -2.63127 | 1 | 1 RP11-45A16.4   | -      |
| ENSG00000244791 | 5.13E-15 | -2.63127 | 1 | 1 RP11-65D17.1   | -      |
| ENSG00000244953 | 5.13E-15 | -2.63127 | 1 | 1 RP11-613D13.8  | -      |
| ENSG00000245008 | 5.13E-15 | -2.63127 | 1 | 1 RP11-744N12.3  | -      |
| ENSG00000245080 | 5.13E-15 | -2.63127 | 1 | 1 MIR3150A       | -      |
| ENSG00000245112 | 5.13E-15 | -2.63127 | 1 | 1 SMARCA5-AS1    | -      |
| ENSG00000245164 | 5.13E-15 | -2.63127 | 1 | 1 LINC00861      | -      |
| ENSG00000245261 | 5.13E-15 | -2.63127 | 1 | 1 RP3-330M21.5   | -      |
| ENSG00000245322 | 5.13E-15 | -2.63127 | 1 | 1 RP11-15B17.1   | -      |
| ENSG00000245384 | 5.13E-15 | -2.63127 | 1 | 1 AC004053.1     | -      |
| ENSG00000245385 | 5.13E-15 | -2.63127 | 1 | 1 RP11-334E6.10  | -      |
| ENSG00000245466 | 5.13E-15 | -2.63127 | 1 | 1 CTD-2540L5.6   | -      |
| ENSG00000245468 | 5.13E-15 | -2.63127 | 1 | 1 RP11-367J11.3  | -      |
| ENSG00000245479 | 5.13E-15 | -2.63127 | 1 | 1 RP11-387D10.3  | -      |
| ENSG00000245482 | 5.13E-15 | -2.63127 | 1 | 1 RP11-847H18.2  | -      |
| ENSG00000245526 | 5.13E-15 | -2.63127 | 1 | 1 LINC00461      | -      |
| ENSG00000245662 | 5.13E-15 | -2.63127 | 1 | 1 RP11-184E9.1   | -      |
| ENSG00000245667 | 5.13E-15 | -2.63127 | 1 | 1 RP5-940J5.8    | -      |
| ENSG00000245685 | 5.13E-15 | -2.63127 | 1 | 1 AF146191.4     | -      |
| ENSG00000245688 | 5.13E-15 | -2.63127 | 1 | 1 CTB-26E19.1    | -      |
| ENSG00000245768 | 5.13E-15 | -2.63127 | 1 | 1 RP11-410D17.2  | -      |
| ENSG00000245832 | 5.13E-15 | -2.63127 | 1 | 1 RP11-179A16.1  | -      |
| ENSG00000245857 | 5.13E-15 | -2.63127 | 1 | 1 GS1-24F4.2     | -      |
| ENSG00000245864 | 5.13E-15 | -2.63127 | 1 | 1 CTC-467M3.1    | -      |
| ENSG00000245870 | 5.13E-15 | -2.63127 | 1 | 1 LINC00682      | -      |
| ENSG00000245928 | 5.13E-15 | -2.63127 | 1 | 1 RP11-630D6.5   | -      |
| ENSG00000246022 | 5.13E-15 | -2.63127 | 1 | 1 ALDH1L1-AS2    | -      |
| ENSG00000246082 | 5.13E-15 | -2.63127 | 1 | 1 NUDT16P1       | K16855 |
| ENSG00000246084 | 5.13E-15 | -2.63127 | 1 | 1 CTD-2506J14.1  | -      |
| ENSG00000246095 | 5.13E-15 | -2.63127 | 1 | 1 LINC01096      | -      |
| ENSG00000246100 | 5.13E-15 | -2.63127 | 1 | 1 LINC00900      | -      |
| ENSG00000246115 | 5.13E-15 | -2.63127 | 1 | 1 RP11-561P12.2  | K15171 |
| ENSG00000246214 | 5.13E-15 | -2.63127 | 1 | 1 RP11-260E18.1  | -      |
| ENSG00000246223 | 5.13E-15 | -2.63127 | 1 | 1 C14orf64       | K04613 |
| ENSG00000246225 | 5.13E-15 | -2.63127 | 1 | 1 RP11-17A1.3    | -      |
| ENSG00000246283 | 5.13E-15 | -2.63127 | 1 | 1 CTD-2036P10.3  | -      |
| ENSG00000246316 | 5.13E-15 | -2.63127 | 1 | 1 RP11-492A10.1  | -      |
| ENSG00000246331 | 5.13E-15 | -2.63127 | 1 | 1 RP11-77I22.2   | -      |
| ENSG00000246350 | 5.13E-15 | -2.63127 | 1 | 1 RP5-1186N24.3  | -      |
| ENSG00000246363 | 5.13E-15 | -2.63127 | 1 | 1 RP11-13A1.1    | -      |
| ENSG00000246375 | 5.13E-15 | -2.63127 | 1 | 1 RP11-10L7.1    | -      |
| ENSG00000246379 | 5.13E-15 | -2.63127 | 1 | 1 RP11-461O7.1   | -      |
| ENSG00000246394 | 5.13E-15 | -2.63127 | 1 | 1 RP11-386I8.6   | -      |
| ENSG00000246422 | 5.13E-15 | -2.63127 | 1 | 1 CTD-2024I7.13  | -      |
| ENSG00000246448 | 5.13E-15 | -2.63127 | 1 | 1 RP13-578N3.3   | -      |
| ENSG00000246528 | 5.13E-15 | -2.63127 | 1 | 1 RP11-159H10.3  | -      |
| ENSG00000246541 | 5.13E-15 | -2.63127 | 1 | 1 RP11-363G15.2  | -      |
| ENSG00000246548 | 5.13E-15 | -2.63127 | 1 | 1 RP11-7F17.5    | -      |
| ENSG00000246596 | 5.13E-15 | -2.63127 | 1 | 1 RP11-1277A3.2  | -      |
| ENSG00000246627 | 5.13E-15 | -2.63127 | 1 | 1 CACNA1C-AS1    | -      |
| ENSG00000246662 | 5.13E-15 | -2.63127 | 1 | 1 LINC00535      | -      |
| ENSG00000246774 | 5.13E-15 | -2.63127 | 1 | 1 AC004051.2     | -      |
| ENSG00000246790 | 5.13E-15 | -2.63127 | 1 | 1 RP11-730K11.1  | -      |
| ENSG00000246820 | 5.13E-15 | -2.63127 | 1 | 1 RP11-379P15.1  | -      |
| ENSG00000246876 | 5.13E-15 | -2.63127 | 1 | 1 RP11-519M16.1  | -      |

|                 |          |          |   |                 |        |
|-----------------|----------|----------|---|-----------------|--------|
| ENSG00000247033 | 5.13E-15 | -2.63127 | 1 | 1 RP11-252E2.1  | --     |
| ENSG00000247049 | 5.13E-15 | -2.63127 | 1 | 1 CTC-338M12.7  | --     |
| ENSG00000247130 | 5.13E-15 | -2.63127 | 1 | 1 RP11-366H4.3  | --     |
| ENSG00000247131 | 5.13E-15 | -2.63127 | 1 | 1 RP11-588G21.2 | --     |
| ENSG00000247157 | 5.13E-15 | -2.63127 | 1 | 1 RP11-434C1.1  | --     |
| ENSG00000247193 | 5.13E-15 | -2.63127 | 1 | 1 RP11-431M7.3  | --     |
| ENSG00000247213 | 5.13E-15 | -2.63127 | 1 | 1 RP11-13G14.4  | --     |
| ENSG00000247270 | 5.13E-15 | -2.63127 | 1 | 1 AC132186.1    | K09228 |
| ENSG00000247287 | 5.13E-15 | -2.63127 | 1 | 1 RP11-902B17.1 | --     |
| ENSG00000247315 | 5.13E-15 | -2.63127 | 1 | 1 AL034548.1    | --     |
| ENSG00000247381 | 5.13E-15 | -2.63127 | 1 | 1 PDX1-AS1      | --     |
| ENSG00000247402 | 5.13E-15 | -2.63127 | 1 | 1 CTD-2340E1.2  | --     |
| ENSG00000247416 | 5.13E-15 | -2.63127 | 1 | 1 RP11-629G13.1 | --     |
| ENSG00000247570 | 5.13E-15 | -2.63127 | 1 | 1 SDCBPP2       | K17254 |
| ENSG00000247699 | 5.13E-15 | -2.63127 | 1 | 1 CTB-127C13.1  | --     |
| ENSG00000247732 | 5.13E-15 | -2.63127 | 1 | 1 RP11-404K5.1  | K10595 |
| ENSG00000247746 | 5.13E-15 | -2.63127 | 1 | 1 USP51         | K11366 |
| ENSG00000247763 | 5.13E-15 | -2.63127 | 1 | 1 RP11-447H19.1 | K07374 |
| ENSG00000247765 | 5.13E-15 | -2.63127 | 1 | 1 RP11-32B5.7   | --     |
| ENSG00000247775 | 5.13E-15 | -2.63127 | 1 | 1 RP11-67M1.1   | --     |
| ENSG00000247810 | 5.13E-15 | -2.63127 | 1 | 1 RP11-103J17.1 | --     |
| ENSG00000247867 | 5.13E-15 | -2.63127 | 1 | 1 CTD-2530H12.1 | --     |
| ENSG00000247911 | 5.13E-15 | -2.63127 | 1 | 1 HMG11P12      | --     |
| ENSG00000247970 | 5.13E-15 | -2.63127 | 1 | 1 RP11-543C4.1  | --     |
| ENSG00000247993 | 5.13E-15 | -2.63127 | 1 | 1 RP11-79P5.2   | --     |
| ENSG00000248029 | 5.13E-15 | -2.63127 | 1 | 1 CTD-2313F11.3 | --     |
| ENSG00000248050 | 5.13E-15 | -2.63127 | 1 | 1 RP11-422N16.3 | --     |
| ENSG00000248100 | 5.13E-15 | -2.63127 | 1 | 1 RP11-709A23.1 | --     |
| ENSG00000248101 | 5.13E-15 | -2.63127 | 1 | 1 AC002116.8    | --     |
| ENSG00000248104 | 5.13E-15 | -2.63127 | 1 | 1 TARS2P1       | K01868 |
| ENSG00000248105 | 5.13E-15 | -2.63127 | 1 | 1 CTD-2218K11.3 | --     |
| ENSG00000248106 | 5.13E-15 | -2.63127 | 1 | 1 AC005609.2    | --     |
| ENSG00000248107 | 5.13E-15 | -2.63127 | 1 | 1 CTC-339D2.1   | --     |
| ENSG00000248112 | 5.13E-15 | -2.63127 | 1 | 1 RP11-78C3.1   | --     |
| ENSG00000248113 | 5.13E-15 | -2.63127 | 1 | 1 RP11-791G16.4 | K07293 |
| ENSG00000248114 | 5.13E-15 | -2.63127 | 1 | 1 AC114812.9    | --     |
| ENSG00000248115 | 5.13E-15 | -2.63127 | 1 | 1 RP11-752D24.2 | --     |
| ENSG00000248117 | 5.13E-15 | -2.63127 | 1 | 1 MINOS1P4      | --     |
| ENSG00000248118 | 5.13E-15 | -2.63127 | 1 | 1 LINC01019     | --     |
| ENSG00000248120 | 5.13E-15 | -2.63127 | 1 | 1 RP11-301A5.2  | K02932 |
| ENSG00000248122 | 5.13E-15 | -2.63127 | 1 | 1 APOOP4        | --     |
| ENSG00000248125 | 5.13E-15 | -2.63127 | 1 | 1 CTB-73N10.1   | --     |
| ENSG00000248127 | 5.13E-15 | -2.63127 | 1 | 1 CTC-235G5.3   | --     |
| ENSG00000248128 | 5.13E-15 | -2.63127 | 1 | 1 RP11-777B9.4  | --     |
| ENSG00000248132 | 5.13E-15 | -2.63127 | 1 | 1 CTD-2037L6.2  | --     |
| ENSG00000248133 | 5.13E-15 | -2.63127 | 1 | 1 RP11-302F12.7 | --     |
| ENSG00000248134 | 5.13E-15 | -2.63127 | 1 | 1 AC079395.1    | K12019 |
| ENSG00000248136 | 5.13E-15 | -2.63127 | 1 | 1 MTND6P8       | --     |
| ENSG00000248137 | 5.13E-15 | -2.63127 | 1 | 1 RP11-468D11.1 | --     |
| ENSG00000248138 | 5.13E-15 | -2.63127 | 1 | 1 RP11-446J8.1  | --     |
| ENSG00000248139 | 5.13E-15 | -2.63127 | 1 | 1 CUL4AP1       | K10609 |
| ENSG00000248143 | 5.13E-15 | -2.63127 | 1 | 1 RP11-324J13.2 | --     |
| ENSG00000248144 | 5.13E-15 | -2.63127 | 1 | 1 ADH1C         | K13951 |
| ENSG00000248145 | 5.13E-15 | -2.63127 | 1 | 1 CTC-305H11.1  | --     |
| ENSG00000248147 | 5.13E-15 | -2.63127 | 1 | 1 RP11-395P13.1 | --     |
| ENSG00000248148 | 5.13E-15 | -2.63127 | 1 | 1 RP11-357F12.1 | --     |
| ENSG00000248150 | 5.13E-15 | -2.63127 | 1 | 1 RP1-167G20.1  | --     |
| ENSG00000248152 | 5.13E-15 | -2.63127 | 1 | 1 RP11-650J17.1 | --     |

|                 |          |          |   |                 |        |
|-----------------|----------|----------|---|-----------------|--------|
| ENSG00000248155 | 5.13E-15 | -2.63127 | 1 | 1 WI2-89927D4.1 | K18622 |
| ENSG00000248159 | 5.13E-15 | -2.63127 | 1 | 1 HSPA8P11      | K03283 |
| ENSG00000248160 | 5.13E-15 | -2.63127 | 1 | 1 RP11-432M8.14 | -      |
| ENSG00000248162 | 5.13E-15 | -2.63127 | 1 | 1 RP11-294O2.1  | K16729 |
| ENSG00000248165 | 5.13E-15 | -2.63127 | 1 | 1 RP11-44F21.2  | -      |
| ENSG00000248166 | 5.13E-15 | -2.63127 | 1 | 1 AC008984.2    | -      |
| ENSG00000248167 | 5.13E-15 | -2.63127 | 1 | 1 TRIM39-RPP21  | K12015 |
| ENSG00000248170 | 5.13E-15 | -2.63127 | 1 | 1 RP11-1072N2.4 | -      |
| ENSG00000248173 | 5.13E-15 | -2.63127 | 1 | 1 RP11-659O3.1  | -      |
| ENSG00000248174 | 5.13E-15 | -2.63127 | 1 | 1 RP11-148L24.1 | -      |
| ENSG00000248176 | 5.13E-15 | -2.63127 | 1 | 1 RP11-472K22.1 | -      |
| ENSG00000248180 | 5.13E-15 | -2.63127 | 1 | 1 GAPDHP60      | K00134 |
| ENSG00000248184 | 5.13E-15 | -2.63127 | 1 | 1 RP11-231C18.1 | -      |
| ENSG00000248185 | 5.13E-15 | -2.63127 | 1 | 1 CTD-2049O17.1 | -      |
| ENSG00000248188 | 5.13E-15 | -2.63127 | 1 | 1 RP11-442P12.2 | K09548 |
| ENSG00000248191 | 5.13E-15 | -2.63127 | 1 | 1 PES1P1        | K14843 |
| ENSG00000248192 | 5.13E-15 | -2.63127 | 1 | 1 ATG10-AS1     | -      |
| ENSG00000248195 | 5.13E-15 | -2.63127 | 1 | 1 CTC-261N6.3   | -      |
| ENSG00000248197 | 5.13E-15 | -2.63127 | 1 | 1 LINC00290     | -      |
| ENSG00000248199 | 5.13E-15 | -2.63127 | 1 | 1 CTD-2244C20.2 | -      |
| ENSG00000248200 | 5.13E-15 | -2.63127 | 1 | 1 RP11-115A14.1 | K02880 |
| ENSG00000248202 | 5.13E-15 | -2.63127 | 1 | 1 RP11-455B3.1  | -      |
| ENSG00000248203 | 5.13E-15 | -2.63127 | 1 | 1 CTC-503K11.2  | -      |
| ENSG00000248205 | 5.13E-15 | -2.63127 | 1 | 1 RP11-321E2.11 | K11253 |
| ENSG00000248208 | 5.13E-15 | -2.63127 | 1 | 1 RP11-153M7.1  | -      |
| ENSG00000248209 | 5.13E-15 | -2.63127 | 1 | 1 RP11-18O11.1  | K03134 |
| ENSG00000248210 | 5.13E-15 | -2.63127 | 1 | 1 RP11-24I21.1  | -      |
| ENSG00000248211 | 5.13E-15 | -2.63127 | 1 | 1 TRPC7-AS1     | -      |
| ENSG00000248215 | 5.13E-15 | -2.63127 | 1 | 1 RP11-722M1.1  | -      |
| ENSG00000248216 | 5.13E-15 | -2.63127 | 1 | 1 RP11-648M2.2  | -      |
| ENSG00000248221 | 5.13E-15 | -2.63127 | 1 | 1 STX18-IT1     | -      |
| ENSG00000248222 | 5.13E-15 | -2.63127 | 1 | 1 CTB-174D11.1  | -      |
| ENSG00000248227 | 5.13E-15 | -2.63127 | 1 | 1 RP11-83C7.1   | -      |
| ENSG00000248228 | 5.13E-15 | -2.63127 | 1 | 1 SLIT2-IT1     | -      |
| ENSG00000248229 | 5.13E-15 | -2.63127 | 1 | 1 RP11-366M4.12 | -      |
| ENSG00000248231 | 5.13E-15 | -2.63127 | 1 | 1 KRT8P4        | K07605 |
| ENSG00000248236 | 5.13E-15 | -2.63127 | 1 | 1 CTD-2151A2.2  | -      |
| ENSG00000248237 | 5.13E-15 | -2.63127 | 1 | 1 RP11-593F5.1  | K02270 |
| ENSG00000248242 | 5.13E-15 | -2.63127 | 1 | 1 RP11-556I14.2 | -      |
| ENSG00000248243 | 5.13E-15 | -2.63127 | 1 | 1 RP11-93K22.13 | -      |
| ENSG00000248245 | 5.13E-15 | -2.63127 | 1 | 1 CTB-49A3.2    | -      |
| ENSG00000248249 | 5.13E-15 | -2.63127 | 1 | 1 RP11-598O12.1 | K16733 |
| ENSG00000248259 | 5.13E-15 | -2.63127 | 1 | 1 RP11-63H19.5  | -      |
| ENSG00000248261 | 5.13E-15 | -2.63127 | 1 | 1 CTD-2333K2.1  | -      |
| ENSG00000248262 | 5.13E-15 | -2.63127 | 1 | 1 RP11-1J7.1    | -      |
| ENSG00000248266 | 5.13E-15 | -2.63127 | 1 | 1 RP11-402C9.1  | -      |
| ENSG00000248268 | 5.13E-15 | -2.63127 | 1 | 1 CTC-499J9.1   | -      |
| ENSG00000248271 | 5.13E-15 | -2.63127 | 1 | 1 PGAM1P1       | K01834 |
| ENSG00000248279 | 5.13E-15 | -2.63127 | 1 | 1 CTD-2218G20.2 | -      |
| ENSG00000248281 | 5.13E-15 | -2.63127 | 1 | 1 RP11-174E22.2 | K01363 |
| ENSG00000248282 | 5.13E-15 | -2.63127 | 1 | 1 RP11-112L18.1 | -      |
| ENSG00000248283 | 5.13E-15 | -2.63127 | 1 | 1 RP11-473D24.1 | -      |
| ENSG00000248285 | 5.13E-15 | -2.63127 | 1 | 1 RP11-158J3.2  | -      |
| ENSG00000248286 | 5.13E-15 | -2.63127 | 1 | 1 RP11-811J10.1 | K00507 |
| ENSG00000248287 | 5.13E-15 | -2.63127 | 1 | 1 SCGB1D5P      | -      |
| ENSG00000248288 | 5.13E-15 | -2.63127 | 1 | 1 CTD-2194F4.2  | K02932 |
| ENSG00000248290 | 5.13E-15 | -2.63127 | 1 | 1 TNXA          | K06252 |
| ENSG00000248293 | 5.13E-15 | -2.63127 | 1 | 1 CTC-281M20.3  | K11644 |

|                 |          |          |   |                  |        |
|-----------------|----------|----------|---|------------------|--------|
| ENSG00000248294 | 5.13E-15 | -2.63127 | 1 | 1 CTD-2023N9.2   | -      |
| ENSG00000248295 | 5.13E-15 | -2.63127 | 1 | 1 CTC-555I19.1   | K17043 |
| ENSG00000248296 | 5.13E-15 | -2.63127 | 1 | 1 CTD-2308B18.3  | -      |
| ENSG00000248300 | 5.13E-15 | -2.63127 | 1 | 1 RP11-74M11.2   | -      |
| ENSG00000248302 | 5.13E-15 | -2.63127 | 1 | 1 Z95704.4       | K15464 |
| ENSG00000248305 | 5.13E-15 | -2.63127 | 1 | 1 RP11-310A13.2  | K17306 |
| ENSG00000248307 | 5.13E-15 | -2.63127 | 1 | 1 LINC00616      | -      |
| ENSG00000248308 | 5.13E-15 | -2.63127 | 1 | 1 RP11-697E23.1  | -      |
| ENSG00000248309 | 5.13E-15 | -2.63127 | 1 | 1 MEF2C-AS1      | -      |
| ENSG00000248311 | 5.13E-15 | -2.63127 | 1 | 1 CTD-2161F6.2   | -      |
| ENSG00000248313 | 5.13E-15 | -2.63127 | 1 | 1 CYP4F27P       | K17726 |
| ENSG00000248315 | 5.13E-15 | -2.63127 | 1 | 1 RP11-3N2.11    | -      |
| ENSG00000248317 | 5.13E-15 | -2.63127 | 1 | 1 RP11-463H12.2  | -      |
| ENSG00000248319 | 5.13E-15 | -2.63127 | 1 | 1 RP11-205M3.3   | -      |
| ENSG00000248320 | 5.13E-15 | -2.63127 | 1 | 1 PRKRIRP9       | -      |
| ENSG00000248322 | 5.13E-15 | -2.63127 | 1 | 1 RP4-559A3.6    | -      |
| ENSG00000248327 | 5.13E-15 | -2.63127 | 1 | 1 RP11-443J23.1  | -      |
| ENSG00000248328 | 5.13E-15 | -2.63127 | 1 | 1 RP11-63H19.6   | -      |
| ENSG00000248329 | 5.13E-15 | -2.63127 | 1 | 1 RP11-366M4.3   | -      |
| ENSG00000248330 | 5.13E-15 | -2.63127 | 1 | 1 LINC00613      | -      |
| ENSG00000248332 | 5.13E-15 | -2.63127 | 1 | 1 RP11-236J17.5  | -      |
| ENSG00000248335 | 5.13E-15 | -2.63127 | 1 | 1 RP11-102N12.2  | -      |
| ENSG00000248336 | 5.13E-15 | -2.63127 | 1 | 1 HMGN1P11       | K11299 |
| ENSG00000248337 | 5.13E-15 | -2.63127 | 1 | 1 RP11-432M8.18  | -      |
| ENSG00000248338 | 5.13E-15 | -2.63127 | 1 | 1 RP11-472K22.2  | -      |
| ENSG00000248339 | 5.13E-15 | -2.63127 | 1 | 1 RP11-717H13.1  | -      |
| ENSG00000248340 | 5.13E-15 | -2.63127 | 1 | 1 RP11-293A21.2  | -      |
| ENSG00000248341 | 5.13E-15 | -2.63127 | 1 | 1 AC115115.2     | -      |
| ENSG00000248343 | 5.13E-15 | -2.63127 | 1 | 1 RP11-556G22.2  | -      |
| ENSG00000248345 | 5.13E-15 | -2.63127 | 1 | 1 RP11-262D11.1  | -      |
| ENSG00000248347 | 5.13E-15 | -2.63127 | 1 | 1 RP11-1134I14.2 | K17299 |
| ENSG00000248349 | 5.13E-15 | -2.63127 | 1 | 1 RP11-79C6.1    | -      |
| ENSG00000248350 | 5.13E-15 | -2.63127 | 1 | 1 CTC-470E21.1   | K19765 |
| ENSG00000248351 | 5.13E-15 | -2.63127 | 1 | 1 HSPD1P18       | K04077 |
| ENSG00000248355 | 5.13E-15 | -2.63127 | 1 | 1 ARL2BPP6       | K16742 |
| ENSG00000248356 | 5.13E-15 | -2.63127 | 1 | 1 RP11-557J10.4  | -      |
| ENSG00000248358 | 5.13E-15 | -2.63127 | 1 | 1 AE000658.31    | -      |
| ENSG00000248359 | 5.13E-15 | -2.63127 | 1 | 1 CTC-537E7.2    | -      |
| ENSG00000248360 | 5.13E-15 | -2.63127 | 1 | 1 LINC00504      | -      |
| ENSG00000248362 | 5.13E-15 | -2.63127 | 1 | 1 CTC-327F10.5   | -      |
| ENSG00000248363 | 5.13E-15 | -2.63127 | 1 | 1 CTC-261N6.1    | -      |
| ENSG00000248364 | 5.13E-15 | -2.63127 | 1 | 1 OR7E86P        | K04257 |
| ENSG00000248365 | 5.13E-15 | -2.63127 | 1 | 1 POU5F1P7       | -      |
| ENSG00000248366 | 5.13E-15 | -2.63127 | 1 | 1 TRAJ51         | -      |
| ENSG00000248369 | 5.13E-15 | -2.63127 | 1 | 1 RP11-62N21.1   | -      |
| ENSG00000248371 | 5.13E-15 | -2.63127 | 1 | 1 CTC-347C20.2   | -      |
| ENSG00000248373 | 5.13E-15 | -2.63127 | 1 | 1 RP11-556I14.1  | -      |
| ENSG00000248374 | 5.13E-15 | -2.63127 | 1 | 1 RP11-501M7.1   | -      |
| ENSG00000248376 | 5.13E-15 | -2.63127 | 1 | 1 RP11-692E14.1  | K14563 |
| ENSG00000248378 | 5.13E-15 | -2.63127 | 1 | 1 RP11-5N11.5    | -      |
| ENSG00000248383 | 5.13E-15 | -2.63127 | 1 | 1 PCDHAC1        | K16493 |
| ENSG00000248385 | 5.13E-15 | -2.63127 | 1 | 1 TARM1          | K12022 |
| ENSG00000248387 | 5.13E-15 | -2.63127 | 1 | 1 RP11-781M16.1  | -      |
| ENSG00000248388 | 5.13E-15 | -2.63127 | 1 | 1 RP11-313E19.2  | -      |
| ENSG00000248391 | 5.13E-15 | -2.63127 | 1 | 1 CTD-2010I22.2  | -      |
| ENSG00000248393 | 5.13E-15 | -2.63127 | 1 | 1 CTD-2015A6.1   | -      |
| ENSG00000248396 | 5.13E-15 | -2.63127 | 1 | 1 TOMM22P4       | K17769 |
| ENSG00000248397 | 5.13E-15 | -2.63127 | 1 | 1 LINC00498      | -      |

|                 |          |          |   |                 |        |
|-----------------|----------|----------|---|-----------------|--------|
| ENSG00000248399 | 5.13E-15 | -2.63127 | 1 | 1 RP11-503N18.4 | -      |
| ENSG00000248400 | 5.13E-15 | -2.63127 | 1 | 1 ST13P12       | K09560 |
| ENSG00000248401 | 5.13E-15 | -2.63127 | 1 | 1 RP11-576N17.3 | K00605 |
| ENSG00000248403 | 5.13E-15 | -2.63127 | 1 | 1 NACAP6        | K03626 |
| ENSG00000248406 | 5.13E-15 | -2.63127 | 1 | 1 CTD-3105H18.4 | K09228 |
| ENSG00000248408 | 5.13E-15 | -2.63127 | 1 | 1 RP11-452C8.1  | -      |
| ENSG00000248409 | 5.13E-15 | -2.63127 | 1 | 1 KB-1269D1.8   | -      |
| ENSG00000248415 | 5.13E-15 | -2.63127 | 1 | 1 GAPDHP61      | K00134 |
| ENSG00000248417 | 5.13E-15 | -2.63127 | 1 | 1 RP11-802H3.2  | -      |
| ENSG00000248418 | 5.13E-15 | -2.63127 | 1 | 1 UBL5P1        | K13113 |
| ENSG00000248419 | 5.13E-15 | -2.63127 | 1 | 1 RP11-136I13.2 | -      |
| ENSG00000248420 | 5.13E-15 | -2.63127 | 1 | 1 MTATP6P9      | K02126 |
| ENSG00000248422 | 5.13E-15 | -2.63127 | 1 | 1 RP11-432M8.7  | -      |
| ENSG00000248423 | 5.13E-15 | -2.63127 | 1 | 1 RP11-235P11.1 | K04644 |
| ENSG00000248424 | 5.13E-15 | -2.63127 | 1 | 1 OR51K1P       | K04257 |
| ENSG00000248425 | 5.13E-15 | -2.63127 | 1 | 1 AC006296.2    | -      |
| ENSG00000248426 | 5.13E-15 | -2.63127 | 1 | 1 CTD-2533K21.2 | -      |
| ENSG00000248428 | 5.13E-15 | -2.63127 | 1 | 1 CTC-551A13.1  | -      |
| ENSG00000248429 | 5.13E-15 | -2.63127 | 1 | 1 RP11-597D13.9 | -      |
| ENSG00000248430 | 5.13E-15 | -2.63127 | 1 | 1 HMGB3P16      | K11296 |
| ENSG00000248431 | 5.13E-15 | -2.63127 | 1 | 1 AC005150.1    | -      |
| ENSG00000248434 | 5.13E-15 | -2.63127 | 1 | 1 RP11-553P9.2  | -      |
| ENSG00000248439 | 5.13E-15 | -2.63127 | 1 | 1 RP11-402J6.2  | K02893 |
| ENSG00000248440 | 5.13E-15 | -2.63127 | 1 | 1 RP11-231G15.1 | -      |
| ENSG00000248441 | 5.13E-15 | -2.63127 | 1 | 1 CTD-2536I1.1  | -      |
| ENSG00000248442 | 5.13E-15 | -2.63127 | 1 | 1 OR10J7P       | K04257 |
| ENSG00000248443 | 5.13E-15 | -2.63127 | 1 | 1 RP11-284A20.3 | -      |
| ENSG00000248444 | 5.13E-15 | -2.63127 | 1 | 1 HNRNPA1P65    | K12741 |
| ENSG00000248447 | 5.13E-15 | -2.63127 | 1 | 1 RP11-633G11.1 | K12037 |
| ENSG00000248448 | 5.13E-15 | -2.63127 | 1 | 1 COX5BP1       | K02265 |
| ENSG00000248449 | 5.13E-15 | -2.63127 | 1 | 1 PCDHGB8P      | K16495 |
| ENSG00000248452 | 5.13E-15 | -2.63127 | 1 | 1 RP11-324H7.1  | K09228 |
| ENSG00000248455 | 5.13E-15 | -2.63127 | 1 | 1 RP11-321E2.3  | -      |
| ENSG00000248456 | 5.13E-15 | -2.63127 | 1 | 1 RP11-553P9.3  | -      |
| ENSG00000248457 | 5.13E-15 | -2.63127 | 1 | 1 RP11-419C19.2 | -      |
| ENSG00000248458 | 5.13E-15 | -2.63127 | 1 | 1 AL139147.1    | -      |
| ENSG00000248459 | 5.13E-15 | -2.63127 | 1 | 1 RP11-93K22.1  | K02962 |
| ENSG00000248461 | 5.13E-15 | -2.63127 | 1 | 1 CTD-2207A17.1 | -      |
| ENSG00000248462 | 5.13E-15 | -2.63127 | 1 | 1 CTD-2042D5.1  | -      |
| ENSG00000248464 | 5.13E-15 | -2.63127 | 1 | 1 FGF10-AS1     | -      |
| ENSG00000248466 | 5.13E-15 | -2.63127 | 1 | 1 RP11-640B6.1  | -      |
| ENSG00000248467 | 5.13E-15 | -2.63127 | 1 | 1 CTD-2161F6.1  | -      |
| ENSG00000248468 | 5.13E-15 | -2.63127 | 1 | 1 RP11-517B11.4 | -      |
| ENSG00000248469 | 5.13E-15 | -2.63127 | 1 | 1 RP11-826N14.2 | -      |
| ENSG00000248471 | 5.13E-15 | -2.63127 | 1 | 1 RP11-432M8.15 | K03135 |
| ENSG00000248472 | 5.13E-15 | -2.63127 | 1 | 1 DDX11L9       | K11273 |
| ENSG00000248474 | 5.13E-15 | -2.63127 | 1 | 1 CTD-2292M14.1 | -      |
| ENSG00000248475 | 5.13E-15 | -2.63127 | 1 | 1 RP11-479O16.1 | -      |
| ENSG00000248477 | 5.13E-15 | -2.63127 | 1 | 1 RP11-848G14.2 | K12807 |
| ENSG00000248478 | 5.13E-15 | -2.63127 | 1 | 1 RP11-3G20.2   | -      |
| ENSG00000248480 | 5.13E-15 | -2.63127 | 1 | 1 RP11-313E19.1 | -      |
| ENSG00000248482 | 5.13E-15 | -2.63127 | 1 | 1 CTC-276P9.3   | -      |
| ENSG00000248483 | 5.13E-15 | -2.63127 | 1 | 1 POU5F2        | K17985 |
| ENSG00000248484 | 5.13E-15 | -2.63127 | 1 | 1 RP11-375B1.1  | -      |
| ENSG00000248485 | 5.13E-15 | -2.63127 | 1 | 1 PCP4L1        | -      |
| ENSG00000248486 | 5.13E-15 | -2.63127 | 1 | 1 RP1-137K24.1  | -      |
| ENSG00000248488 | 5.13E-15 | -2.63127 | 1 | 1 PGAM4P2       | K01834 |
| ENSG00000248490 | 5.13E-15 | -2.63127 | 1 | 1 CTD-3007L5.1  | -      |

|                 |          |          |   |                 |        |
|-----------------|----------|----------|---|-----------------|--------|
| ENSG00000248492 | 5.13E-15 | -2.63127 | 1 | 1 ZFAT-AS1      | --     |
| ENSG00000248493 | 5.13E-15 | -2.63127 | 1 | 1 AC005351.1    | --     |
| ENSG00000248494 | 5.13E-15 | -2.63127 | 1 | 1 LNX1-AS2      | --     |
| ENSG00000248503 | 5.13E-15 | -2.63127 | 1 | 1 RP5-1000K24.2 | --     |
| ENSG00000248505 | 5.13E-15 | -2.63127 | 1 | 1 RP11-319E12.1 | --     |
| ENSG00000248506 | 5.13E-15 | -2.63127 | 1 | 1 RP11-93I21.2  | K07374 |
| ENSG00000248507 | 5.13E-15 | -2.63127 | 1 | 1 OR5H4P        | K04257 |
| ENSG00000248510 | 5.13E-15 | -2.63127 | 1 | 1 RP11-145G20.1 | --     |
| ENSG00000248511 | 5.13E-15 | -2.63127 | 1 | 1 RP11-9B6.1    | --     |
| ENSG00000248516 | 5.13E-15 | -2.63127 | 1 | 1 RP11-265O12.1 | --     |
| ENSG00000248517 | 5.13E-15 | -2.63127 | 1 | 1 RP11-386B13.4 | --     |
| ENSG00000248518 | 5.13E-15 | -2.63127 | 1 | 1 RP11-231C18.2 | --     |
| ENSG00000248522 | 5.13E-15 | -2.63127 | 1 | 1 SBF1P1        | K18061 |
| ENSG00000248525 | 5.13E-15 | -2.63127 | 1 | 1 CTD-2001E22.1 | --     |
| ENSG00000248528 | 5.13E-15 | -2.63127 | 1 | 1 CTC-458G6.2   | --     |
| ENSG00000248529 | 5.13E-15 | -2.63127 | 1 | 1 RP11-2O17.2   | --     |
| ENSG00000248530 | 5.13E-15 | -2.63127 | 1 | 1 RP11-517B11.2 | --     |
| ENSG00000248531 | 5.13E-15 | -2.63127 | 1 | 1 NDUFA5P12     | K03949 |
| ENSG00000248532 | 5.13E-15 | -2.63127 | 1 | 1 RP11-241F15.5 | --     |
| ENSG00000248533 | 5.13E-15 | -2.63127 | 1 | 1 CTD-2130F23.1 | --     |
| ENSG00000248537 | 5.13E-15 | -2.63127 | 1 | 1 CTD-2201E9.4  | --     |
| ENSG00000248538 | 5.13E-15 | -2.63127 | 1 | 1 RP11-10A14.5  | --     |
| ENSG00000248539 | 5.13E-15 | -2.63127 | 1 | 1 CTD-2194L12.2 | --     |
| ENSG00000248540 | 5.13E-15 | -2.63127 | 1 | 1 RP11-247C2.2  | K15696 |
| ENSG00000248542 | 5.13E-15 | -2.63127 | 1 | 1 RP11-432M8.16 | K03135 |
| ENSG00000248543 | 5.13E-15 | -2.63127 | 1 | 1 NPM1P41       | K11276 |
| ENSG00000248544 | 5.13E-15 | -2.63127 | 1 | 1 CTB-47B11.3   | --     |
| ENSG00000248545 | 5.13E-15 | -2.63127 | 1 | 1 RP11-302F12.3 | --     |
| ENSG00000248547 | 5.13E-15 | -2.63127 | 1 | 1 RP11-468N14.6 | K10523 |
| ENSG00000248548 | 5.13E-15 | -2.63127 | 1 | 1 MTND4P8       | --     |
| ENSG00000248550 | 5.13E-15 | -2.63127 | 1 | 1 OTX2-AS1      | --     |
| ENSG00000248551 | 5.13E-15 | -2.63127 | 1 | 1 RP11-287F9.2  | --     |
| ENSG00000248552 | 5.13E-15 | -2.63127 | 1 | 1 RP11-138A23.1 | --     |
| ENSG00000248553 | 5.13E-15 | -2.63127 | 1 | 1 OR52H2P       | K04257 |
| ENSG00000248555 | 5.13E-15 | -2.63127 | 1 | 1 RP11-61G23.1  | --     |
| ENSG00000248557 | 5.13E-15 | -2.63127 | 1 | 1 RP11-390G14.1 | --     |
| ENSG00000248560 | 5.13E-15 | -2.63127 | 1 | 1 CTB-14A14.2   | --     |
| ENSG00000248564 | 5.13E-15 | -2.63127 | 1 | 1 RP11-478C6.2  | --     |
| ENSG00000248565 | 5.13E-15 | -2.63127 | 1 | 1 TECRP2        | K10258 |
| ENSG00000248567 | 5.13E-15 | -2.63127 | 1 | 1 RP11-545L5.1  | --     |
| ENSG00000248572 | 5.13E-15 | -2.63127 | 1 | 1 EGFLAM-AS2    | --     |
| ENSG00000248573 | 5.13E-15 | -2.63127 | 1 | 1 PRYP6         | --     |
| ENSG00000248574 | 5.13E-15 | -2.63127 | 1 | 1 ADAM20P2      | K08609 |
| ENSG00000248577 | 5.13E-15 | -2.63127 | 1 | 1 RP11-122C5.2  | K18157 |
| ENSG00000248578 | 5.13E-15 | -2.63127 | 1 | 1 NPM1P21       | K11276 |
| ENSG00000248583 | 5.13E-15 | -2.63127 | 1 | 1 RP11-241F15.1 | K17299 |
| ENSG00000248585 | 5.13E-15 | -2.63127 | 1 | 1 RP11-90P5.1   | --     |
| ENSG00000248586 | 5.13E-15 | -2.63127 | 1 | 1 CTD-2516K3.3  | K14799 |
| ENSG00000248587 | 5.13E-15 | -2.63127 | 1 | 1 GDNF-AS1      | --     |
| ENSG00000248591 | 5.13E-15 | -2.63127 | 1 | 1 CTD-2351A8.1  | --     |
| ENSG00000248593 | 5.13E-15 | -2.63127 | 1 | 1 DSTNP2        | K10363 |
| ENSG00000248594 | 5.13E-15 | -2.63127 | 1 | 1 AC003029.1    | K19526 |
| ENSG00000248596 | 5.13E-15 | -2.63127 | 1 | 1 RP11-844P9.2  | --     |
| ENSG00000248597 | 5.13E-15 | -2.63127 | 1 | 1 RP11-259O2.2  | --     |
| ENSG00000248600 | 5.13E-15 | -2.63127 | 1 | 1 CTD-2308B18.4 | --     |
| ENSG00000248601 | 5.13E-15 | -2.63127 | 1 | 1 RP11-310I9.1  | --     |
| ENSG00000248605 | 5.13E-15 | -2.63127 | 1 | 1 CTD-2306M5.1  | --     |
| ENSG00000248608 | 5.13E-15 | -2.63127 | 1 | 1 RP11-206P5.2  | K01858 |



|                 |          |          |   |                  |        |
|-----------------|----------|----------|---|------------------|--------|
| ENSG00000248610 | 5.13E-15 | -2.63127 | 1 | 1 HSPA8P4        | K03283 |
| ENSG00000248611 | 5.13E-15 | -2.63127 | 1 | 1 RP11-158C21.3  | K00602 |
| ENSG00000248613 | 5.13E-15 | -2.63127 | 1 | 1 RP11-468N14.7  | -      |
| ENSG00000248616 | 5.13E-15 | -2.63127 | 1 | 1 CTB-1I21.2     | -      |
| ENSG00000248618 | 5.13E-15 | -2.63127 | 1 | 1 ENPP7P3        | -      |
| ENSG00000248621 | 5.13E-15 | -2.63127 | 1 | 1 RP11-5K16.3    | -      |
| ENSG00000248624 | 5.13E-15 | -2.63127 | 1 | 1 RP11-5N11.2    | -      |
| ENSG00000248625 | 5.13E-15 | -2.63127 | 1 | 1 RP11-205M3.1   | K05019 |
| ENSG00000248626 | 5.13E-15 | -2.63127 | 1 | 1 GAPDHP40       | K00134 |
| ENSG00000248627 | 5.13E-15 | -2.63127 | 1 | 1 RP11-428L21.1  | -      |
| ENSG00000248629 | 5.13E-15 | -2.63127 | 1 | 1 RP11-154F14.2  | -      |
| ENSG00000248631 | 5.13E-15 | -2.63127 | 1 | 1 RP11-425E13.1  | -      |
| ENSG00000248632 | 5.13E-15 | -2.63127 | 1 | 1 RP11-366M4.11  | K12029 |
| ENSG00000248633 | 5.13E-15 | -2.63127 | 1 | 1 WRBP1          | -      |
| ENSG00000248634 | 5.13E-15 | -2.63127 | 1 | 1 CTC-573M9.1    | -      |
| ENSG00000248635 | 5.13E-15 | -2.63127 | 1 | 1 RP11-1267H10.4 | K00699 |
| ENSG00000248636 | 5.13E-15 | -2.63127 | 1 | 1 RP11-768F21.1  | -      |
| ENSG00000248637 | 5.13E-15 | -2.63127 | 1 | 1 RP11-485C11.1  | K10580 |
| ENSG00000248639 | 5.13E-15 | -2.63127 | 1 | 1 RP11-642E20.2  | K00699 |
| ENSG00000248640 | 5.13E-15 | -2.63127 | 1 | 1 HNRNPA1P56     | K12741 |
| ENSG00000248641 | 5.13E-15 | -2.63127 | 1 | 1 HMGA1P2        | K09282 |
| ENSG00000248642 | 5.13E-15 | -2.63127 | 1 | 1 OR10J2P        | K04257 |
| ENSG00000248645 | 5.13E-15 | -2.63127 | 1 | 1 RP11-366M4.6   | K12029 |
| ENSG00000248646 | 5.13E-15 | -2.63127 | 1 | 1 RP11-567N4.2   | -      |
| ENSG00000248647 | 5.13E-15 | -2.63127 | 1 | 1 RP11-331K21.1  | -      |
| ENSG00000248651 | 5.13E-15 | -2.63127 | 1 | 1 GCSHP1         | K02437 |
| ENSG00000248652 | 5.13E-15 | -2.63127 | 1 | 1 RP11-101B14.4  | -      |
| ENSG00000248654 | 5.13E-15 | -2.63127 | 1 | 1 RP11-302F12.5  | K02262 |
| ENSG00000248659 | 5.13E-15 | -2.63127 | 1 | 1 RP11-263I1.1   | -      |
| ENSG00000248660 | 5.13E-15 | -2.63127 | 1 | 1 SRIP1          | -      |
| ENSG00000248667 | 5.13E-15 | -2.63127 | 1 | 1 CTD-2331D11.2  | -      |
| ENSG00000248669 | 5.13E-15 | -2.63127 | 1 | 1 RP11-489M13.2  | K04257 |
| ENSG00000248672 | 5.13E-15 | -2.63127 | 1 | 1 LY75-CD302     | K06559 |
| ENSG00000248673 | 5.13E-15 | -2.63127 | 1 | 1 CTC-419K13.1   | -      |
| ENSG00000248674 | 5.13E-15 | -2.63127 | 1 | 1 RBBP4P6        | -      |
| ENSG00000248676 | 5.13E-15 | -2.63127 | 1 | 1 RP11-766F14.1  | -      |
| ENSG00000248682 | 5.13E-15 | -2.63127 | 1 | 1 ARHGAP22-IT1   | -      |
| ENSG00000248684 | 5.13E-15 | -2.63127 | 1 | 1 BIN2P2         | -      |
| ENSG00000248685 | 5.13E-15 | -2.63127 | 1 | 1 RP11-548L20.1  | -      |
| ENSG00000248686 | 5.13E-15 | -2.63127 | 1 | 1 RP11-557J10.5  | -      |
| ENSG00000248687 | 5.13E-15 | -2.63127 | 1 | 1 RP11-42L13.2   | -      |
| ENSG00000248692 | 5.13E-15 | -2.63127 | 1 | 1 RP11-84A1.3    | -      |
| ENSG00000248694 | 5.13E-15 | -2.63127 | 1 | 1 RP11-18D7.2    | -      |
| ENSG00000248697 | 5.13E-15 | -2.63127 | 1 | 1 TOX4P1         | -      |
| ENSG00000248699 | 5.13E-15 | -2.63127 | 1 | 1 CTD-2313D3.1   | K05692 |
| ENSG00000248701 | 5.13E-15 | -2.63127 | 1 | 1 CTC-493L21.2   | -      |
| ENSG00000248702 | 5.13E-15 | -2.63127 | 1 | 1 RP11-294J22.5  | K17274 |
| ENSG00000248703 | 5.13E-15 | -2.63127 | 1 | 1 RP11-495K9.3   | -      |
| ENSG00000248704 | 5.13E-15 | -2.63127 | 1 | 1 MTND4P2        | -      |
| ENSG00000248705 | 5.13E-15 | -2.63127 | 1 | 1 AC114812.10    | -      |
| ENSG00000248708 | 5.13E-15 | -2.63127 | 1 | 1 CTD-2316B1.2   | -      |
| ENSG00000248709 | 5.13E-15 | -2.63127 | 1 | 1 CTC-505O3.2    | -      |
| ENSG00000248710 | 5.13E-15 | -2.63127 | 1 | 1 RP11-432B6.3   | K19678 |
| ENSG00000248711 | 5.13E-15 | -2.63127 | 1 | 1 AC006023.8     | -      |
| ENSG00000248715 | 5.13E-15 | -2.63127 | 1 | 1 RP11-758B24.1  | -      |
| ENSG00000248716 | 5.13E-15 | -2.63127 | 1 | 1 RP11-362M19.1  | -      |
| ENSG00000248717 | 5.13E-15 | -2.63127 | 1 | 1 RP11-451H23.3  | -      |
| ENSG00000248719 | 5.13E-15 | -2.63127 | 1 | 1 RP11-377G16.2  | -      |

|                 |          |          |   |                 |        |
|-----------------|----------|----------|---|-----------------|--------|
| ENSG00000248720 | 5.13E-15 | -2.63127 | 1 | 1 RFPL4AP5      | --     |
| ENSG00000248722 | 5.13E-15 | -2.63127 | 1 | 1 AK3P4         | --     |
| ENSG00000248724 | 5.13E-15 | -2.63127 | 1 | 1 NPHP3-AS1     | --     |
| ENSG00000248725 | 5.13E-15 | -2.63127 | 1 | 1 RP11-218C23.1 | --     |
| ENSG00000248727 | 5.13E-15 | -2.63127 | 1 | 1 CTC-236F12.4  | --     |
| ENSG00000248730 | 5.13E-15 | -2.63127 | 1 | 1 EGFLAM-AS4    | --     |
| ENSG00000248731 | 5.13E-15 | -2.63127 | 1 | 1 AC090103.1    | K12581 |
| ENSG00000248733 | 5.13E-15 | -2.63127 | 1 | 1 CTD-2176I21.2 | --     |
| ENSG00000248735 | 5.13E-15 | -2.63127 | 1 | 1 R3HDM2P1      | --     |
| ENSG00000248736 | 5.13E-15 | -2.63127 | 1 | 1 RP11-35O7.1   | --     |
| ENSG00000248738 | 5.13E-15 | -2.63127 | 1 | 1 RP11-87E22.2  | --     |
| ENSG00000248739 | 5.13E-15 | -2.63127 | 1 | 1 RP11-654F3.1  | --     |
| ENSG00000248740 | 5.13E-15 | -2.63127 | 1 | 1 RP11-328K4.1  | --     |
| ENSG00000248744 | 5.13E-15 | -2.63127 | 1 | 1 RP11-362I1.1  | --     |
| ENSG00000248745 | 5.13E-15 | -2.63127 | 1 | 1 NMNAT1P4      | K06210 |
| ENSG00000248747 | 5.13E-15 | -2.63127 | 1 | 1 RP11-586L23.1 | --     |
| ENSG00000248748 | 5.13E-15 | -2.63127 | 1 | 1 MTND5P9       | K03883 |
| ENSG00000248749 | 5.13E-15 | -2.63127 | 1 | 1 RP11-42A4.1   | --     |
| ENSG00000248750 | 5.13E-15 | -2.63127 | 1 | 1 RP11-131K17.1 | K18405 |
| ENSG00000248755 | 5.13E-15 | -2.63127 | 1 | 1 RP11-384D10.1 | --     |
| ENSG00000248758 | 5.13E-15 | -2.63127 | 1 | 1 CTD-2215E18.2 | --     |
| ENSG00000248760 | 5.13E-15 | -2.63127 | 1 | 1 RP11-727M10.2 | --     |
| ENSG00000248761 | 5.13E-15 | -2.63127 | 1 | 1 CTD-2593A12.2 | --     |
| ENSG00000248762 | 5.13E-15 | -2.63127 | 1 | 1 RP11-31K23.2  | --     |
| ENSG00000248763 | 5.13E-15 | -2.63127 | 1 | 1 RP13-644M16.5 | --     |
| ENSG00000248764 | 5.13E-15 | -2.63127 | 1 | 1 RP11-292D4.2  | --     |
| ENSG00000248765 | 5.13E-15 | -2.63127 | 1 | 1 RP11-417J1.3  | --     |
| ENSG00000248766 | 5.13E-15 | -2.63127 | 1 | 1 RP11-61K20.1  | --     |
| ENSG00000248767 | 5.13E-15 | -2.63127 | 1 | 1 WI2-2373I1.2  | --     |
| ENSG00000248769 | 5.13E-15 | -2.63127 | 1 | 1 RP11-974F13.5 | --     |
| ENSG00000248770 | 5.13E-15 | -2.63127 | 1 | 1 RP11-665C14.1 | --     |
| ENSG00000248771 | 5.13E-15 | -2.63127 | 1 | 1 RP11-294O2.2  | --     |
| ENSG00000248772 | 5.13E-15 | -2.63127 | 1 | 1 RP11-639F1.1  | --     |
| ENSG00000248775 | 5.13E-15 | -2.63127 | 1 | 1 RP11-404K5.3  | K18172 |
| ENSG00000248777 | 5.13E-15 | -2.63127 | 1 | 1 AC006499.6    | --     |
| ENSG00000248778 | 5.13E-15 | -2.63127 | 1 | 1 RP11-311D14.1 | K13183 |
| ENSG00000248779 | 5.13E-15 | -2.63127 | 1 | 1 RP11-53O19.2  | --     |
| ENSG00000248780 | 5.13E-15 | -2.63127 | 1 | 1 RP11-632F7.1  | K07945 |
| ENSG00000248781 | 5.13E-15 | -2.63127 | 1 | 1 PSMC1P4       | K03062 |
| ENSG00000248785 | 5.13E-15 | -2.63127 | 1 | 1 HIGD1AP14     | --     |
| ENSG00000248789 | 5.13E-15 | -2.63127 | 1 | 1 CTD-2203A3.1  | --     |
| ENSG00000248790 | 5.13E-15 | -2.63127 | 1 | 1 RP11-319G6.3  | --     |
| ENSG00000248792 | 5.13E-15 | -2.63127 | 1 | 1 LINC00266-2P  | K16941 |
| ENSG00000248796 | 5.13E-15 | -2.63127 | 1 | 1 MED15P8       | K15157 |
| ENSG00000248799 | 5.13E-15 | -2.63127 | 1 | 1 CTC-548H10.2  | --     |
| ENSG00000248801 | 5.13E-15 | -2.63127 | 1 | 1 RP11-664D7.4  | K12870 |
| ENSG00000248802 | 5.13E-15 | -2.63127 | 1 | 1 RP11-184M15.2 | --     |
| ENSG00000248803 | 5.13E-15 | -2.63127 | 1 | 1 RP11-287J9.1  | --     |
| ENSG00000248807 | 5.13E-15 | -2.63127 | 1 | 1 KRTAP9-12P    | --     |
| ENSG00000248809 | 5.13E-15 | -2.63127 | 1 | 1 LINC01095     | --     |
| ENSG00000248810 | 5.13E-15 | -2.63127 | 1 | 1 RP11-362F19.1 | --     |
| ENSG00000248813 | 5.13E-15 | -2.63127 | 1 | 1 RP11-5N11.4   | --     |
| ENSG00000248816 | 5.13E-15 | -2.63127 | 1 | 1 RP11-18D7.3   | --     |
| ENSG00000248817 | 5.13E-15 | -2.63127 | 1 | 1 RP11-562F9.1  | K01412 |
| ENSG00000248820 | 5.13E-15 | -2.63127 | 1 | 1 RP11-15B17.3  | K10418 |
| ENSG00000248821 | 5.13E-15 | -2.63127 | 1 | 1 AC009238.6    | K00629 |
| ENSG00000248822 | 5.13E-15 | -2.63127 | 1 | 1 APOBEC3AP1    | --     |
| ENSG00000248824 | 5.13E-15 | -2.63127 | 1 | 1 RP11-790I12.6 | K00699 |

|                 |          |          |   |                   |        |
|-----------------|----------|----------|---|-------------------|--------|
| ENSG00000248826 | 5.13E-15 | -2.63127 | 1 | 1 PCBP2P3         | K13162 |
| ENSG00000248827 | 5.13E-15 | -2.63127 | 1 | 1 RP11-252I13.1   | K11838 |
| ENSG00000248828 | 5.13E-15 | -2.63127 | 1 | 1 RP11-673E1.4    | -      |
| ENSG00000248830 | 5.13E-15 | -2.63127 | 1 | 1 ZNF807          | K09228 |
| ENSG00000248831 | 5.13E-15 | -2.63127 | 1 | 1 CTB-179I1.2     | -      |
| ENSG00000248834 | 5.13E-15 | -2.63127 | 1 | 1 MARK2P5         | -      |
| ENSG00000248837 | 5.13E-15 | -2.63127 | 1 | 1 RP11-412P11.1   | -      |
| ENSG00000248838 | 5.13E-15 | -2.63127 | 1 | 1 PGAM1P13        | K01834 |
| ENSG00000248839 | 5.13E-15 | -2.63127 | 1 | 1 RP11-227H4.5    | -      |
| ENSG00000248840 | 5.13E-15 | -2.63127 | 1 | 1 RP11-357G3.2    | -      |
| ENSG00000248842 | 5.13E-15 | -2.63127 | 1 | 1 CTB-1H10.1      | -      |
| ENSG00000248843 | 5.13E-15 | -2.63127 | 1 | 1 RP11-357G3.1    | K02936 |
| ENSG00000248844 | 5.13E-15 | -2.63127 | 1 | 1 RP11-626H12.3   | -      |
| ENSG00000248846 | 5.13E-15 | -2.63127 | 1 | 1 CTD-2016O11.1   | -      |
| ENSG00000248847 | 5.13E-15 | -2.63127 | 1 | 1 RP11-26C10.1    | -      |
| ENSG00000248848 | 5.13E-15 | -2.63127 | 1 | 1 PPBPP2          | K10029 |
| ENSG00000248850 | 5.13E-15 | -2.63127 | 1 | 1 RP11-605F14.2   | K12826 |
| ENSG00000248851 | 5.13E-15 | -2.63127 | 1 | 1 AC006427.2      | -      |
| ENSG00000248853 | 5.13E-15 | -2.63127 | 1 | 1 CTD-2613O8.1    | -      |
| ENSG00000248854 | 5.13E-15 | -2.63127 | 1 | 1 HNRNPH1P3       | K12898 |
| ENSG00000248858 | 5.13E-15 | -2.63127 | 1 | 1 RP11-100L22.2   | -      |
| ENSG00000248859 | 5.13E-15 | -2.63127 | 1 | 1 RP11-375B1.3    | -      |
| ENSG00000248861 | 5.13E-15 | -2.63127 | 1 | 1 RP11-321E2.2    | K03135 |
| ENSG00000248864 | 5.13E-15 | -2.63127 | 1 | 1 RP11-348J24.1   | -      |
| ENSG00000248867 | 5.13E-15 | -2.63127 | 1 | 1 CTD-2128F4.1    | K09512 |
| ENSG00000248869 | 5.13E-15 | -2.63127 | 1 | 1 RP11-138I17.1   | -      |
| ENSG00000248870 | 5.13E-15 | -2.63127 | 1 | 1 CTD-2015A6.2    | -      |
| ENSG00000248871 | 5.13E-15 | -2.63127 | 1 | 1 TNFSF12-TNFSF13 | K05474 |
| ENSG00000248872 | 5.13E-15 | -2.63127 | 1 | 1 RP11-344G13.1   | -      |
| ENSG00000248874 | 5.13E-15 | -2.63127 | 1 | 1 C5orf17         | K00121 |
| ENSG00000248876 | 5.13E-15 | -2.63127 | 1 | 1 RP11-231G15.3   | -      |
| ENSG00000248877 | 5.13E-15 | -2.63127 | 1 | 1 PGBD4P4         | -      |
| ENSG00000248878 | 5.13E-15 | -2.63127 | 1 | 1 RP11-5N11.1     | K12900 |
| ENSG00000248880 | 5.13E-15 | -2.63127 | 1 | 1 NARG2P1         | -      |
| ENSG00000248881 | 5.13E-15 | -2.63127 | 1 | 1 CTC-366B18.2    | -      |
| ENSG00000248883 | 5.13E-15 | -2.63127 | 1 | 1 CTD-2244F11.2   | -      |
| ENSG00000248885 | 5.13E-15 | -2.63127 | 1 | 1 RP11-950K24.2   | K16944 |
| ENSG00000248886 | 5.13E-15 | -2.63127 | 1 | 1 UGT2A3P7        | K00699 |
| ENSG00000248890 | 5.13E-15 | -2.63127 | 1 | 1 HHIP-AS1        | -      |
| ENSG00000248891 | 5.13E-15 | -2.63127 | 1 | 1 CTD-2335O3.2    | K12877 |
| ENSG00000248893 | 5.13E-15 | -2.63127 | 1 | 1 FAM138E         | -      |
| ENSG00000248895 | 5.13E-15 | -2.63127 | 1 | 1 RP11-463M16.5   | -      |
| ENSG00000248901 | 5.13E-15 | -2.63127 | 1 | 1 AC008834.1      | -      |
| ENSG00000248903 | 5.13E-15 | -2.63127 | 1 | 1 AP000867.14     | -      |
| ENSG00000248907 | 5.13E-15 | -2.63127 | 1 | 1 MTND2P33        | K03879 |
| ENSG00000248911 | 5.13E-15 | -2.63127 | 1 | 1 RP11-182E14.1   | -      |
| ENSG00000248912 | 5.13E-15 | -2.63127 | 1 | 1 RP11-171N4.4    | -      |
| ENSG00000248913 | 5.13E-15 | -2.63127 | 1 | 1 PHBP14          | -      |
| ENSG00000248915 | 5.13E-15 | -2.63127 | 1 | 1 ACTR6P1         | -      |
| ENSG00000248918 | 5.13E-15 | -2.63127 | 1 | 1 CTD-2089N3.3    | -      |
| ENSG00000248919 | 5.13E-15 | -2.63127 | 1 | 1 ATP5J2-PTCD1    | K17710 |
| ENSG00000248920 | 5.13E-15 | -2.63127 | 1 | 1 USP17L19        | K11845 |
| ENSG00000248921 | 5.13E-15 | -2.63127 | 1 | 1 RP11-774G5.1    | -      |
| ENSG00000248924 | 5.13E-15 | -2.63127 | 1 | 1 RP11-481K16.2   | K12741 |
| ENSG00000248926 | 5.13E-15 | -2.63127 | 1 | 1 RP11-777B9.1    | K12900 |
| ENSG00000248927 | 5.13E-15 | -2.63127 | 1 | 1 CTD-2334D19.1   | -      |
| ENSG00000248928 | 5.13E-15 | -2.63127 | 1 | 1 CTD-2151A2.3    | K11507 |
| ENSG00000248929 | 5.13E-15 | -2.63127 | 1 | 1 HIGD1AP3        | -      |

|                 |          |          |   |                   |        |
|-----------------|----------|----------|---|-------------------|--------|
| ENSG00000248930 | 5.13E-15 | -2.63127 | 1 | 1 CTC-250P20.1    | K17610 |
| ENSG00000248931 | 5.13E-15 | -2.63127 | 1 | 1 RP11-72K17.2    | K00412 |
| ENSG00000248933 | 5.13E-15 | -2.63127 | 1 | 1 USP17L22        | K11845 |
| ENSG00000248935 | 5.13E-15 | -2.63127 | 1 | 1 CTD-2254N19.1   | -      |
| ENSG00000248939 | 5.13E-15 | -2.63127 | 1 | 1 RP11-395F4.1    | -      |
| ENSG00000248942 | 5.13E-15 | -2.63127 | 1 | 1 CTD-2275D24.4   | -      |
| ENSG00000248943 | 5.13E-15 | -2.63127 | 1 | 1 RP11-1026M7.3   | -      |
| ENSG00000248944 | 5.13E-15 | -2.63127 | 1 | 1 FAM90A6P        | -      |
| ENSG00000248946 | 5.13E-15 | -2.63127 | 1 | 1 RP11-1281K21.7  | K03880 |
| ENSG00000248951 | 5.13E-15 | -2.63127 | 1 | 1 RP11-325I22.1   | -      |
| ENSG00000248954 | 5.13E-15 | -2.63127 | 1 | 1 RP11-304F15.4   | -      |
| ENSG00000248955 | 5.13E-15 | -2.63127 | 1 | 1 RP11-114H7.3    | -      |
| ENSG00000248956 | 5.13E-15 | -2.63127 | 1 | 1 HMGB1P44        | K10802 |
| ENSG00000248958 | 5.13E-15 | -2.63127 | 1 | 1 ZSWIM5P3        | -      |
| ENSG00000248962 | 5.13E-15 | -2.63127 | 1 | 1 CTD-2287N17.1   | -      |
| ENSG00000248965 | 5.13E-15 | -2.63127 | 1 | 1 CTB-174D11.2    | -      |
| ENSG00000248966 | 5.13E-15 | -2.63127 | 1 | 1 CTD-2089O24.1   | K13087 |
| ENSG00000248967 | 5.13E-15 | -2.63127 | 1 | 1 RP11-241J12.3   | K03094 |
| ENSG00000248969 | 5.13E-15 | -2.63127 | 1 | 1 CTD-2113L7.1    | -      |
| ENSG00000248973 | 5.13E-15 | -2.63127 | 1 | 1 RP11-445O3.2    | -      |
| ENSG00000248975 | 5.13E-15 | -2.63127 | 1 | 1 CTD-2251F13.1   | -      |
| ENSG00000248977 | 5.13E-15 | -2.63127 | 1 | 1 RP11-395I6.1    | K12741 |
| ENSG00000248978 | 5.13E-15 | -2.63127 | 1 | 1 RP11-98H4.1     | K00621 |
| ENSG00000248979 | 5.13E-15 | -2.63127 | 1 | 1 LAMTOR3P2       | K04370 |
| ENSG00000248980 | 5.13E-15 | -2.63127 | 1 | 1 RP11-87F15.2    | -      |
| ENSG00000248984 | 5.13E-15 | -2.63127 | 1 | 1 AC004054.1      | -      |
| ENSG00000248986 | 5.13E-15 | -2.63127 | 1 | 1 RP11-774O3.1    | -      |
| ENSG00000248987 | 5.13E-15 | -2.63127 | 1 | 1 PRDX4P1         | -      |
| ENSG00000248988 | 5.13E-15 | -2.63127 | 1 | 1 RP11-815N9.2    | K06697 |
| ENSG00000248990 | 5.13E-15 | -2.63127 | 1 | 1 RP11-960D24.1   | -      |
| ENSG00000248991 | 5.13E-15 | -2.63127 | 1 | 1 RP11-73G16.2    | -      |
| ENSG00000248993 | 5.13E-15 | -2.63127 | 1 | 1 XXbac-BPG181M17 | K06752 |
| ENSG00000248994 | 5.13E-15 | -2.63127 | 1 | 1 RP11-259O2.1    | -      |
| ENSG00000248995 | 5.13E-15 | -2.63127 | 1 | 1 RP11-766N7.4    | -      |
| ENSG00000248998 | 5.13E-15 | -2.63127 | 1 | 1 EFTUD1P2        | -      |
| ENSG00000248999 | 5.13E-15 | -2.63127 | 1 | 1 WI2-2373I1.1    | K09385 |
| ENSG00000249000 | 5.13E-15 | -2.63127 | 1 | 1 CTD-2012I17.1   | -      |
| ENSG00000249001 | 5.13E-15 | -2.63127 | 1 | 1 RP11-742B18.1   | -      |
| ENSG00000249002 | 5.13E-15 | -2.63127 | 1 | 1 RP11-358D17.1   | -      |
| ENSG00000249003 | 5.13E-15 | -2.63127 | 1 | 1 CLUHP4          | -      |
| ENSG00000249004 | 5.13E-15 | -2.63127 | 1 | 1 RP11-752L20.1   | K02516 |
| ENSG00000249005 | 5.13E-15 | -2.63127 | 1 | 1 FAM90A4P        | -      |
| ENSG00000249008 | 5.13E-15 | -2.63127 | 1 | 1 RP11-487E13.1   | -      |
| ENSG00000249013 | 5.13E-15 | -2.63127 | 1 | 1 FTH1P21         | K00522 |
| ENSG00000249014 | 5.13E-15 | -2.63127 | 1 | 1 HMGN2P4         | K11300 |
| ENSG00000249016 | 5.13E-15 | -2.63127 | 1 | 1 RP11-45H22.3    | -      |
| ENSG00000249017 | 5.13E-15 | -2.63127 | 1 | 1 RP11-58B2.1     | -      |
| ENSG00000249018 | 5.13E-15 | -2.63127 | 1 | 1 GAPDHP56        | -      |
| ENSG00000249019 | 5.13E-15 | -2.63127 | 1 | 1 RP11-539G18.1   | K02993 |
| ENSG00000249021 | 5.13E-15 | -2.63127 | 1 | 1 CTC-505O3.3     | -      |
| ENSG00000249022 | 5.13E-15 | -2.63127 | 1 | 1 RP11-285C1.2    | -      |
| ENSG00000249023 | 5.13E-15 | -2.63127 | 1 | 1 CTD-2331D11.3   | -      |
| ENSG00000249025 | 5.13E-15 | -2.63127 | 1 | 1 RP11-2H3.2      | K09228 |
| ENSG00000249026 | 5.13E-15 | -2.63127 | 1 | 1 CTNNAP1         | K05691 |
| ENSG00000249028 | 5.13E-15 | -2.63127 | 1 | 1 RP5-951N9.1     | -      |
| ENSG00000249034 | 5.13E-15 | -2.63127 | 1 | 1 AC005609.1      | K16493 |
| ENSG00000249035 | 5.13E-15 | -2.63127 | 1 | 1 CTB-113P19.1    | -      |
| ENSG00000249036 | 5.13E-15 | -2.63127 | 1 | 1 RP11-625I7.1    | -      |

|                 |          |          |   |                  |        |
|-----------------|----------|----------|---|------------------|--------|
| ENSG00000249038 | 5.13E-15 | -2.63127 | 1 | 1 RP11-149A7.1   | --     |
| ENSG00000249041 | 5.13E-15 | -2.63127 | 1 | 1 RP11-21G20.3   | --     |
| ENSG00000249045 | 5.13E-15 | -2.63127 | 1 | 1 RP11-63H19.8   | --     |
| ENSG00000249048 | 5.13E-15 | -2.63127 | 1 | 1 TRAV31         | --     |
| ENSG00000249049 | 5.13E-15 | -2.63127 | 1 | 1 RP11-763F8.1   | --     |
| ENSG00000249050 | 5.13E-15 | -2.63127 | 1 | 1 RP11-375N15.1  | --     |
| ENSG00000249051 | 5.13E-15 | -2.63127 | 1 | 1 RP11-447E20.1  | --     |
| ENSG00000249052 | 5.13E-15 | -2.63127 | 1 | 1 RP11-354O24.1  | --     |
| ENSG00000249054 | 5.13E-15 | -2.63127 | 1 | 1 RP11-598F7.1   | --     |
| ENSG00000249056 | 5.13E-15 | -2.63127 | 1 | 1 RP11-326I11.1  | K11128 |
| ENSG00000249057 | 5.13E-15 | -2.63127 | 1 | 1 MAST4-IT1      | --     |
| ENSG00000249061 | 5.13E-15 | -2.63127 | 1 | 1 RP11-72L22.1   | --     |
| ENSG00000249064 | 5.13E-15 | -2.63127 | 1 | 1 KRT18P25       | K07604 |
| ENSG00000249065 | 5.13E-15 | -2.63127 | 1 | 1 PCNAP1         | K04802 |
| ENSG00000249066 | 5.13E-15 | -2.63127 | 1 | 1 RP11-593F5.2   | --     |
| ENSG00000249069 | 5.13E-15 | -2.63127 | 1 | 1 LINC01033      | --     |
| ENSG00000249071 | 5.13E-15 | -2.63127 | 1 | 1 EGFLAM-AS3     | --     |
| ENSG00000249072 | 5.13E-15 | -2.63127 | 1 | 1 RP11-777B9.5   | K01982 |
| ENSG00000249073 | 5.13E-15 | -2.63127 | 1 | 1 CTD-2131I18.1  | --     |
| ENSG00000249074 | 5.13E-15 | -2.63127 | 1 | 1 RP11-21G20.1   | K03958 |
| ENSG00000249077 | 5.13E-15 | -2.63127 | 1 | 1 RP11-478C1.8   | --     |
| ENSG00000249079 | 5.13E-15 | -2.63127 | 1 | 1 RP11-1281K21.3 | K17299 |
| ENSG00000249081 | 5.13E-15 | -2.63127 | 1 | 1 OR5M14P        | K04257 |
| ENSG00000249082 | 5.13E-15 | -2.63127 | 1 | 1 CTC-276P9.1    | --     |
| ENSG00000249086 | 5.13E-15 | -2.63127 | 1 | 1 AC051649.12    | --     |
| ENSG00000249089 | 5.13E-15 | -2.63127 | 1 | 1 AIG1P1         | --     |
| ENSG00000249091 | 5.13E-15 | -2.63127 | 1 | 1 RP11-733C7.1   | --     |
| ENSG00000249092 | 5.13E-15 | -2.63127 | 1 | 1 CTD-2325A15.3  | K03767 |
| ENSG00000249094 | 5.13E-15 | -2.63127 | 1 | 1 RP1-7G5.6      | --     |
| ENSG00000249098 | 5.13E-15 | -2.63127 | 1 | 1 RP11-39E3.4    | K09377 |
| ENSG00000249099 | 5.13E-15 | -2.63127 | 1 | 1 RP11-351N6.1   | --     |
| ENSG00000249100 | 5.13E-15 | -2.63127 | 1 | 1 CTD-2218K11.2  | --     |
| ENSG00000249101 | 5.13E-15 | -2.63127 | 1 | 1 AC008834.2     | K01008 |
| ENSG00000249102 | 5.13E-15 | -2.63127 | 1 | 1 CTD-2066L21.1  | --     |
| ENSG00000249104 | 5.13E-15 | -2.63127 | 1 | 1 USP17L17       | K11845 |
| ENSG00000249105 | 5.13E-15 | -2.63127 | 1 | 1 RP11-25L5.2    | K18598 |
| ENSG00000249106 | 5.13E-15 | -2.63127 | 1 | 1 RP11-806K15.1  | --     |
| ENSG00000249109 | 5.13E-15 | -2.63127 | 1 | 1 RP11-1026M7.2  | --     |
| ENSG00000249111 | 5.13E-15 | -2.63127 | 1 | 1 RP11-622J8.1   | --     |
| ENSG00000249112 | 5.13E-15 | -2.63127 | 1 | 1 RP11-43D2.2    | --     |
| ENSG00000249114 | 5.13E-15 | -2.63127 | 1 | 1 RP11-5N11.3    | --     |
| ENSG00000249116 | 5.13E-15 | -2.63127 | 1 | 1 CTD-2194D22.3  | --     |
| ENSG00000249122 | 5.13E-15 | -2.63127 | 1 | 1 RP11-227F19.2  | --     |
| ENSG00000249125 | 5.13E-15 | -2.63127 | 1 | 1 RP11-381N20.2  | --     |
| ENSG00000249127 | 5.13E-15 | -2.63127 | 1 | 1 MTND3P3        | --     |
| ENSG00000249128 | 5.13E-15 | -2.63127 | 1 | 1 RP11-2N5.1     | --     |
| ENSG00000249131 | 5.13E-15 | -2.63127 | 1 | 1 CTB-35F21.2    | --     |
| ENSG00000249135 | 5.13E-15 | -2.63127 | 1 | 1 RP11-274E7.1   | --     |
| ENSG00000249138 | 5.13E-15 | -2.63127 | 1 | 1 RP11-701P16.1  | --     |
| ENSG00000249139 | 5.13E-15 | -2.63127 | 1 | 1 EPPIN-WFDC6    | --     |
| ENSG00000249142 | 5.13E-15 | -2.63127 | 1 | 1 CTD-2290P7.1   | --     |
| ENSG00000249145 | 5.13E-15 | -2.63127 | 1 | 1 RP11-774O3.2   | --     |
| ENSG00000249148 | 5.13E-15 | -2.63127 | 1 | 1 AC006445.7     | K02889 |
| ENSG00000249149 | 5.13E-15 | -2.63127 | 1 | 1 RP11-79P5.3    | K11300 |
| ENSG00000249150 | 5.13E-15 | -2.63127 | 1 | 1 CTC-472C24.1   | --     |
| ENSG00000249152 | 5.13E-15 | -2.63127 | 1 | 1 RP11-562F9.2   | --     |
| ENSG00000249153 | 5.13E-15 | -2.63127 | 1 | 1 CTD-2036A18.2  | --     |
| ENSG00000249156 | 5.13E-15 | -2.63127 | 1 | 1 RP11-432M8.9   | K03135 |

|                 |          |          |   |                 |        |
|-----------------|----------|----------|---|-----------------|--------|
| ENSG00000249157 | 5.13E-15 | -2.63127 | 1 | 1 RP11-229C3.4  | -      |
| ENSG00000249158 | 5.13E-15 | -2.63127 | 1 | 1 PCDHA11       | K16493 |
| ENSG00000249159 | 5.13E-15 | -2.63127 | 1 | 1 RP11-480D4.2  | -      |
| ENSG00000249160 | 5.13E-15 | -2.63127 | 1 | 1 RP11-1C1.5    | -      |
| ENSG00000249162 | 5.13E-15 | -2.63127 | 1 | 1 ADAM20P3      | K16069 |
| ENSG00000249163 | 5.13E-15 | -2.63127 | 1 | 1 CTD-3028N15.1 | -      |
| ENSG00000249166 | 5.13E-15 | -2.63127 | 1 | 1 RP11-1C1.6    | -      |
| ENSG00000249167 | 5.13E-15 | -2.63127 | 1 | 1 CTB-118N6.2   | -      |
| ENSG00000249169 | 5.13E-15 | -2.63127 | 1 | 1 CTC-529L17.1  | -      |
| ENSG00000249170 | 5.13E-15 | -2.63127 | 1 | 1 RP11-1J11.1   | K15273 |
| ENSG00000249171 | 5.13E-15 | -2.63127 | 1 | 1 RP11-767N15.1 | -      |
| ENSG00000249173 | 5.13E-15 | -2.63127 | 1 | 1 LINC01093     | -      |
| ENSG00000249174 | 5.13E-15 | -2.63127 | 1 | 1 RP11-124N3.3  | -      |
| ENSG00000249175 | 5.13E-15 | -2.63127 | 1 | 1 CTC-484P3.3   | -      |
| ENSG00000249177 | 5.13E-15 | -2.63127 | 1 | 1 MTND4P29      | K03881 |
| ENSG00000249180 | 5.13E-15 | -2.63127 | 1 | 1 CTC-506B8.1   | -      |
| ENSG00000249183 | 5.13E-15 | -2.63127 | 1 | 1 SUMO2P4       | K12160 |
| ENSG00000249184 | 5.13E-15 | -2.63127 | 1 | 1 RP11-424M21.1 | -      |
| ENSG00000249186 | 5.13E-15 | -2.63127 | 1 | 1 RP11-423H2.5  | -      |
| ENSG00000249189 | 5.13E-15 | -2.63127 | 1 | 1 AC010492.4    | K06512 |
| ENSG00000249191 | 5.13E-15 | -2.63127 | 1 | 1 UBE2V1P12     | K10704 |
| ENSG00000249192 | 5.13E-15 | -2.63127 | 1 | 1 CTB-36O1.3    | K03880 |
| ENSG00000249193 | 5.13E-15 | -2.63127 | 1 | 1 HSPD1P5       | K04077 |
| ENSG00000249197 | 5.13E-15 | -2.63127 | 1 | 1 OR10J9P       | K04257 |
| ENSG00000249198 | 5.13E-15 | -2.63127 | 1 | 1 RP11-772C9.1  | -      |
| ENSG00000249200 | 5.13E-15 | -2.63127 | 1 | 1 RP11-290O12.1 | K16507 |
| ENSG00000249203 | 5.13E-15 | -2.63127 | 1 | 1 RP11-473L15.3 | -      |
| ENSG00000249206 | 5.13E-15 | -2.63127 | 1 | 1 GCNT1P2       | K00727 |
| ENSG00000249209 | 5.13E-15 | -2.63127 | 1 | 1 AP000304.12   | K02137 |
| ENSG00000249210 | 5.13E-15 | -2.63127 | 1 | 1 GAPDHP38      | K00134 |
| ENSG00000249213 | 5.13E-15 | -2.63127 | 1 | 1 RP11-98P2.1   | K01413 |
| ENSG00000249214 | 5.13E-15 | -2.63127 | 1 | 1 AC022558.1    | K11447 |
| ENSG00000249215 | 5.13E-15 | -2.63127 | 1 | 1 AC138517.4    | K09289 |
| ENSG00000249219 | 5.13E-15 | -2.63127 | 1 | 1 RP13-560N11.1 | -      |
| ENSG00000249222 | 5.13E-15 | -2.63127 | 1 | 1 ATP5L2        | K02140 |
| ENSG00000249225 | 5.13E-15 | -2.63127 | 1 | 1 RP11-343D2.11 | -      |
| ENSG00000249226 | 5.13E-15 | -2.63127 | 1 | 1 SUCLG2P4      | K01900 |
| ENSG00000249228 | 5.13E-15 | -2.63127 | 1 | 1 RP11-769N22.1 | -      |
| ENSG00000249229 | 5.13E-15 | -2.63127 | 1 | 1 CTC-342P15.1  | -      |
| ENSG00000249231 | 5.13E-15 | -2.63127 | 1 | 1 CASC16        | -      |
| ENSG00000249234 | 5.13E-15 | -2.63127 | 1 | 1 RP11-452J21.2 | -      |
| ENSG00000249235 | 5.13E-15 | -2.63127 | 1 | 1 RP11-468N14.4 | K00699 |
| ENSG00000249236 | 5.13E-15 | -2.63127 | 1 | 1 CTD-2227I18.1 | -      |
| ENSG00000249237 | 5.13E-15 | -2.63127 | 1 | 1 RP11-376N17.4 | -      |
| ENSG00000249238 | 5.13E-15 | -2.63127 | 1 | 1 RP11-83M16.2  | -      |
| ENSG00000249239 | 5.13E-15 | -2.63127 | 1 | 1 RP11-428L21.2 | K14753 |
| ENSG00000249244 | 5.13E-15 | -2.63127 | 1 | 1 RP11-548H18.2 | K00864 |
| ENSG00000249245 | 5.13E-15 | -2.63127 | 1 | 1 RP11-557J10.3 | K09289 |
| ENSG00000249247 | 5.13E-15 | -2.63127 | 1 | 1 RP11-627H22.9 | -      |
| ENSG00000249251 | 5.13E-15 | -2.63127 | 1 | 1 PGAM1P8       | K01834 |
| ENSG00000249252 | 5.13E-15 | -2.63127 | 1 | 1 RP11-665G4.1  | -      |
| ENSG00000249253 | 5.13E-15 | -2.63127 | 1 | 1 RP11-77P16.1  | K02128 |
| ENSG00000249255 | 5.13E-15 | -2.63127 | 1 | 1 PGAM1P9       | K01834 |
| ENSG00000249256 | 5.13E-15 | -2.63127 | 1 | 1 ATP5LP3       | K02140 |
| ENSG00000249257 | 5.13E-15 | -2.63127 | 1 | 1 RP11-75N20.2  | -      |
| ENSG00000249258 | 5.13E-15 | -2.63127 | 1 | 1 RP11-468H14.2 | -      |
| ENSG00000249259 | 5.13E-15 | -2.63127 | 1 | 1 RP11-166J5.1  | -      |
| ENSG00000249261 | 5.13E-15 | -2.63127 | 1 | 1 RP11-284A20.2 | -      |

|                 |          |          |   |                    |        |
|-----------------|----------|----------|---|--------------------|--------|
| ENSG00000249262 | 5.13E-15 | -2.63127 | 1 | 1 RP11-710E1.1     | K02884 |
| ENSG00000249263 | 5.13E-15 | -2.63127 | 1 | 1 PARP4P3          | K10798 |
| ENSG00000249265 | 5.13E-15 | -2.63127 | 1 | 1 AC113167.2       | -      |
| ENSG00000249266 | 5.13E-15 | -2.63127 | 1 | 1 MTHFD2P6         | K13403 |
| ENSG00000249267 | 5.13E-15 | -2.63127 | 1 | 1 LINC00939        | -      |
| ENSG00000249269 | 5.13E-15 | -2.63127 | 1 | 1 RP11-756P10.4    | -      |
| ENSG00000249270 | 5.13E-15 | -2.63127 | 1 | 1 KATNBL1P4        | -      |
| ENSG00000249271 | 5.13E-15 | -2.63127 | 1 | 1 HNRNPA1P44       | K12741 |
| ENSG00000249272 | 5.13E-15 | -2.63127 | 1 | 1 UNC93B8          | K04257 |
| ENSG00000249274 | 5.13E-15 | -2.63127 | 1 | 1 PDLIM1P4         | -      |
| ENSG00000249275 | 5.13E-15 | -2.63127 | 1 | 1 RP11-364P22.2    | -      |
| ENSG00000249276 | 5.13E-15 | -2.63127 | 1 | 1 RP11-8L21.1      | -      |
| ENSG00000249277 | 5.13E-15 | -2.63127 | 1 | 1 RP11-302F12.4    | -      |
| ENSG00000249278 | 5.13E-15 | -2.63127 | 1 | 1 RP11-688H10.1    | -      |
| ENSG00000249282 | 5.13E-15 | -2.63127 | 1 | 1 RP11-432M8.6     | -      |
| ENSG00000249283 | 5.13E-15 | -2.63127 | 1 | 1 ACTR3BP4         | K18584 |
| ENSG00000249284 | 5.13E-15 | -2.63127 | 1 | 1 RP11-287F9.1     | -      |
| ENSG00000249285 | 5.13E-15 | -2.63127 | 1 | 1 RP11-81B23.1     | -      |
| ENSG00000249287 | 5.13E-15 | -2.63127 | 1 | 1 CTD-2593A12.3    | K11113 |
| ENSG00000249288 | 5.13E-15 | -2.63127 | 1 | 1 SLC25A15P5       | K15101 |
| ENSG00000249289 | 5.13E-15 | -2.63127 | 1 | 1 CTD-2272G21.1    | -      |
| ENSG00000249290 | 5.13E-15 | -2.63127 | 1 | 1 RP11-68L1.2      | -      |
| ENSG00000249293 | 5.13E-15 | -2.63127 | 1 | 1 CTC-575I10.1     | -      |
| ENSG00000249295 | 5.13E-15 | -2.63127 | 1 | 1 RP11-241G9.3     | -      |
| ENSG00000249297 | 5.13E-15 | -2.63127 | 1 | 1 RP11-97E7.2      | -      |
| ENSG00000249301 | 5.13E-15 | -2.63127 | 1 | 1 RP11-524L6.3     | -      |
| ENSG00000249302 | 5.13E-15 | -2.63127 | 1 | 1 FTH1P24          | K00522 |
| ENSG00000249305 | 5.13E-15 | -2.63127 | 1 | 1 RP11-13L2.1      | K06541 |
| ENSG00000249307 | 5.13E-15 | -2.63127 | 1 | 1 LINC01088        | -      |
| ENSG00000249309 | 5.13E-15 | -2.63127 | 1 | 1 RP11-153M7.5     | -      |
| ENSG00000249310 | 5.13E-15 | -2.63127 | 1 | 1 APOBEC3B-AS1     | -      |
| ENSG00000249311 | 5.13E-15 | -2.63127 | 1 | 1 TERF1P3          | K11110 |
| ENSG00000249312 | 5.13E-15 | -2.63127 | 1 | 1 ARL2BPP4         | K16742 |
| ENSG00000249316 | 5.13E-15 | -2.63127 | 1 | 1 CTC-493P15.2     | -      |
| ENSG00000249317 | 5.13E-15 | -2.63127 | 1 | 1 CTB-191D16.1     | -      |
| ENSG00000249318 | 5.13E-15 | -2.63127 | 1 | 1 AC010468.2       | -      |
| ENSG00000249320 | 5.13E-15 | -2.63127 | 1 | 1 RP11-206P5.1     | -      |
| ENSG00000249321 | 5.13E-15 | -2.63127 | 1 | 1 OR5H5P           | K04257 |
| ENSG00000249329 | 5.13E-15 | -2.63127 | 1 | 1 RP11-432M8.5     | K03135 |
| ENSG00000249330 | 5.13E-15 | -2.63127 | 1 | 1 RP11-436F23.1    | -      |
| ENSG00000249333 | 5.13E-15 | -2.63127 | 1 | 1 LL22NC03-23C6.12 | -      |
| ENSG00000249334 | 5.13E-15 | -2.63127 | 1 | 1 RP11-61G19.1     | -      |
| ENSG00000249335 | 5.13E-15 | -2.63127 | 1 | 1 CTC-340D7.1      | -      |
| ENSG00000249336 | 5.13E-15 | -2.63127 | 1 | 1 RP11-133G22.1    | -      |
| ENSG00000249337 | 5.13E-15 | -2.63127 | 1 | 1 SNX18P25         | K17299 |
| ENSG00000249338 | 5.13E-15 | -2.63127 | 1 | 1 HMGB1P47         | K10802 |
| ENSG00000249339 | 5.13E-15 | -2.63127 | 1 | 1 RP11-321E2.7     | K03135 |
| ENSG00000249341 | 5.13E-15 | -2.63127 | 1 | 1 RP11-317M11.1    | -      |
| ENSG00000249343 | 5.13E-15 | -2.63127 | 1 | 1 CTD-2275D24.2    | -      |
| ENSG00000249347 | 5.13E-15 | -2.63127 | 1 | 1 RP11-747H12.4    | K04257 |
| ENSG00000249349 | 5.13E-15 | -2.63127 | 1 | 1 CTC-384G19.1     | -      |
| ENSG00000249351 | 5.13E-15 | -2.63127 | 1 | 1 RP11-498E11.2    | K12491 |
| ENSG00000249352 | 5.13E-15 | -2.63127 | 1 | 1 7SK              | -      |
| ENSG00000249356 | 5.13E-15 | -2.63127 | 1 | 1 RP11-21I10.2     | -      |
| ENSG00000249360 | 5.13E-15 | -2.63127 | 1 | 1 CTD-2233C11.3    | K11518 |
| ENSG00000249362 | 5.13E-15 | -2.63127 | 1 | 1 CTD-2316B1.1     | -      |
| ENSG00000249363 | 5.13E-15 | -2.63127 | 1 | 1 CTB-78O21.1      | K04969 |
| ENSG00000249364 | 5.13E-15 | -2.63127 | 1 | 1 RP11-434D9.1     | -      |

|                 |          |          |   |                   |        |
|-----------------|----------|----------|---|-------------------|--------|
| ENSG00000249365 | 5.13E-15 | -2.63127 | 1 | 1 RP11-508M8.1    | —      |
| ENSG00000249367 | 5.13E-15 | -2.63127 | 1 | 1 FABP5P12        | K08754 |
| ENSG00000249368 | 5.13E-15 | -2.63127 | 1 | 1 RP11-782K4.1    | —      |
| ENSG00000249372 | 5.13E-15 | -2.63127 | 1 | 1 ATP6V1G1P6      | K02152 |
| ENSG00000249373 | 5.13E-15 | -2.63127 | 1 | 1 RP11-650J17.2   | —      |
| ENSG00000249380 | 5.13E-15 | -2.63127 | 1 | 1 RP11-1325J9.1   | —      |
| ENSG00000249381 | 5.13E-15 | -2.63127 | 1 | 1 LINC00500       | —      |
| ENSG00000249382 | 5.13E-15 | -2.63127 | 1 | 1 RP11-340A13.1   | —      |
| ENSG00000249383 | 5.13E-15 | -2.63127 | 1 | 1 RP11-1018N14.1  | —      |
| ENSG00000249386 | 5.13E-15 | -2.63127 | 1 | 1 RP11-627H22.6   | —      |
| ENSG00000249387 | 5.13E-15 | -2.63127 | 1 | 1 KRTAP5-14P      | —      |
| ENSG00000249392 | 5.13E-15 | -2.63127 | 1 | 1 RP11-725D20.1   | —      |
| ENSG00000249400 | 5.13E-15 | -2.63127 | 1 | 1 HMGB3P17        | K11296 |
| ENSG00000249403 | 5.13E-15 | -2.63127 | 1 | 1 CTC-281M20.4    | —      |
| ENSG00000249404 | 5.13E-15 | -2.63127 | 1 | 1 CTD-2234B20.1   | —      |
| ENSG00000249405 | 5.13E-15 | -2.63127 | 1 | 1 RP11-317O24.1   | —      |
| ENSG00000249406 | 5.13E-15 | -2.63127 | 1 | 1 RP11-893F2.5    | —      |
| ENSG00000249409 | 5.13E-15 | -2.63127 | 1 | 1 RP11-501E14.1   | —      |
| ENSG00000249410 | 5.13E-15 | -2.63127 | 1 | 1 AK4P2           | K00939 |
| ENSG00000249411 | 5.13E-15 | -2.63127 | 1 | 1 RP11-391J13.1   | K08610 |
| ENSG00000249413 | 5.13E-15 | -2.63127 | 1 | 1 RP11-25H12.1    | —      |
| ENSG00000249416 | 5.13E-15 | -2.63127 | 1 | 1 RP11-614F17.1   | —      |
| ENSG00000249417 | 5.13E-15 | -2.63127 | 1 | 1 RP11-438D8.2    | —      |
| ENSG00000249418 | 5.13E-15 | -2.63127 | 1 | 1 AC005741.2      | —      |
| ENSG00000249419 | 5.13E-15 | -2.63127 | 1 | 1 RP11-497K21.1   | —      |
| ENSG00000249421 | 5.13E-15 | -2.63127 | 1 | 1 ADAMTS19-AS1    | —      |
| ENSG00000249423 | 5.13E-15 | -2.63127 | 1 | 1 RP11-284A20.1   | —      |
| ENSG00000249425 | 5.13E-15 | -2.63127 | 1 | 1 RP11-502M1.2    | —      |
| ENSG00000249426 | 5.13E-15 | -2.63127 | 1 | 1 CTC-448D22.1    | —      |
| ENSG00000249427 | 5.13E-15 | -2.63127 | 1 | 1 RP11-432M8.4    | K03135 |
| ENSG00000249429 | 5.13E-15 | -2.63127 | 1 | 1 CTD-2050E21.1   | —      |
| ENSG00000249430 | 5.13E-15 | -2.63127 | 1 | 1 CTD-2231H16.1   | —      |
| ENSG00000249433 | 5.13E-15 | -2.63127 | 1 | 1 CTB-161J7.2     | —      |
| ENSG00000249435 | 5.13E-15 | -2.63127 | 1 | 1 CTD-2224J9.7    | —      |
| ENSG00000249436 | 5.13E-15 | -2.63127 | 1 | 1 CTD-2023N9.3    | —      |
| ENSG00000249438 | 5.13E-15 | -2.63127 | 1 | 1 KRT18P45        | K07604 |
| ENSG00000249439 | 5.13E-15 | -2.63127 | 1 | 1 HMGN1P14        | K11299 |
| ENSG00000249443 | 5.13E-15 | -2.63127 | 1 | 1 RP11-1396O13.22 | K04257 |
| ENSG00000249444 | 5.13E-15 | -2.63127 | 1 | 1 RP11-93O17.1    | —      |
| ENSG00000249446 | 5.13E-15 | -2.63127 | 1 | 1 TRAJ60          | —      |
| ENSG00000249448 | 5.13E-15 | -2.63127 | 1 | 1 RP11-474J18.1   | K02256 |
| ENSG00000249449 | 5.13E-15 | -2.63127 | 1 | 1 MRP63P6         | —      |
| ENSG00000249451 | 5.13E-15 | -2.63127 | 1 | 1 RP11-94C24.6    | —      |
| ENSG00000249452 | 5.13E-15 | -2.63127 | 1 | 1 RP11-638O6.1    | K17493 |
| ENSG00000249453 | 5.13E-15 | -2.63127 | 1 | 1 RP13-497K6.1    | —      |
| ENSG00000249454 | 5.13E-15 | -2.63127 | 1 | 1 GZMAP1          | K01352 |
| ENSG00000249458 | 5.13E-15 | -2.63127 | 1 | 1 RP11-624A4.1    | —      |
| ENSG00000249460 | 5.13E-15 | -2.63127 | 1 | 1 RP11-665C14.2   | —      |
| ENSG00000249462 | 5.13E-15 | -2.63127 | 1 | 1 MLLT10P2        | —      |
| ENSG00000249463 | 5.13E-15 | -2.63127 | 1 | 1 RP11-1E22.1     | —      |
| ENSG00000249464 | 5.13E-15 | -2.63127 | 1 | 1 LINC01091       | —      |
| ENSG00000249467 | 5.13E-15 | -2.63127 | 1 | 1 RP11-492O8.1    | K11251 |
| ENSG00000249472 | 5.13E-15 | -2.63127 | 1 | 1 RP11-1267H10.2  | —      |
| ENSG00000249474 | 5.13E-15 | -2.63127 | 1 | 1 RP11-49I4.3     | —      |
| ENSG00000249478 | 5.13E-15 | -2.63127 | 1 | 1 CTB-49A3.5      | —      |
| ENSG00000249479 | 5.13E-15 | -2.63127 | 1 | 1 RP11-171N4.3    | —      |
| ENSG00000249481 | 5.13E-15 | -2.63127 | 1 | 1 SPATS1          | —      |
| ENSG00000249482 | 5.13E-15 | -2.63127 | 1 | 1 USP17L14P       | K11845 |



|                 |          |          |   |                  |        |
|-----------------|----------|----------|---|------------------|--------|
| ENSG00000249483 | 5.13E-15 | -2.63127 | 1 | 1 CTD-2249K22.1  | --     |
| ENSG00000249484 | 5.13E-15 | -2.63127 | 1 | 1 AC091969.1     | --     |
| ENSG00000249486 | 5.13E-15 | -2.63127 | 1 | 1 RP11-215I16.1  | --     |
| ENSG00000249487 | 5.13E-15 | -2.63127 | 1 | 1 RP11-97O12.2   | --     |
| ENSG00000249488 | 5.13E-15 | -2.63127 | 1 | 1 NACAP5         | K03626 |
| ENSG00000249489 | 5.13E-15 | -2.63127 | 1 | 1 GAPDHP70       | K00134 |
| ENSG00000249490 | 5.13E-15 | -2.63127 | 1 | 1 CTD-2333M24.1  | --     |
| ENSG00000249491 | 5.13E-15 | -2.63127 | 1 | 1 EGFLAM-AS1     | --     |
| ENSG00000249493 | 5.13E-15 | -2.63127 | 1 | 1 ANKRD20A18P    | K17299 |
| ENSG00000249494 | 5.13E-15 | -2.63127 | 1 | 1 CTB-161M19.4   | --     |
| ENSG00000249495 | 5.13E-15 | -2.63127 | 1 | 1 RP11-1152B5.1  | --     |
| ENSG00000249497 | 5.13E-15 | -2.63127 | 1 | 1 RP11-1079K10.5 | --     |
| ENSG00000249500 | 5.13E-15 | -2.63127 | 1 | 1 RP11-340B18.1  | --     |
| ENSG00000249501 | 5.13E-15 | -2.63127 | 1 | 1 USP9YP2        | K11840 |
| ENSG00000249504 | 5.13E-15 | -2.63127 | 1 | 1 PCDHA14        | K16493 |
| ENSG00000249505 | 5.13E-15 | -2.63127 | 1 | 1 RP11-434H6.2   | --     |
| ENSG00000249506 | 5.13E-15 | -2.63127 | 1 | 1 ZEB2P1         | --     |
| ENSG00000249509 | 5.13E-15 | -2.63127 | 1 | 1 RP11-402J6.1   | --     |
| ENSG00000249510 | 5.13E-15 | -2.63127 | 1 | 1 KB-1247B1.1    | K02934 |
| ENSG00000249513 | 5.13E-15 | -2.63127 | 1 | 1 RP11-404I7.1   | --     |
| ENSG00000249514 | 5.13E-15 | -2.63127 | 1 | 1 CTD-2266L18.1  | --     |
| ENSG00000249515 | 5.13E-15 | -2.63127 | 1 | 1 CTD-2151A2.1   | --     |
| ENSG00000249516 | 5.13E-15 | -2.63127 | 1 | 1 CTD-2201E18.2  | --     |
| ENSG00000249518 | 5.13E-15 | -2.63127 | 1 | 1 CTC-327F10.1   | --     |
| ENSG00000249519 | 5.13E-15 | -2.63127 | 1 | 1 RP11-777N19.1  | --     |
| ENSG00000249520 | 5.13E-15 | -2.63127 | 1 | 1 RP11-386B13.1  | K02891 |
| ENSG00000249521 | 5.13E-15 | -2.63127 | 1 | 1 CTD-2161F6.3   | --     |
| ENSG00000249522 | 5.13E-15 | -2.63127 | 1 | 1 RP11-718M20.5  | --     |
| ENSG00000249525 | 5.13E-15 | -2.63127 | 1 | 1 RP11-344G13.2  | --     |
| ENSG00000249531 | 5.13E-15 | -2.63127 | 1 | 1 RP11-642E20.3  | K00699 |
| ENSG00000249534 | 5.13E-15 | -2.63127 | 1 | 1 RP11-83C7.2    | --     |
| ENSG00000249539 | 5.13E-15 | -2.63127 | 1 | 1 MRPS36P2       | --     |
| ENSG00000249541 | 5.13E-15 | -2.63127 | 1 | 1 RP11-692C23.1  | K05605 |
| ENSG00000249542 | 5.13E-15 | -2.63127 | 1 | 1 EEF1A1P21      | K03231 |
| ENSG00000249545 | 5.13E-15 | -2.63127 | 1 | 1 CTC-558O19.1   | --     |
| ENSG00000249547 | 5.13E-15 | -2.63127 | 1 | 1 RP11-453O5.1   | --     |
| ENSG00000249551 | 5.13E-15 | -2.63127 | 1 | 1 RP11-2N5.2     | --     |
| ENSG00000249553 | 5.13E-15 | -2.63127 | 1 | 1 PPP2R2B-IT1    | --     |
| ENSG00000249555 | 5.13E-15 | -2.63127 | 1 | 1 TMEM248P1      | --     |
| ENSG00000249557 | 5.13E-15 | -2.63127 | 1 | 1 HSPD1P15       | K04077 |
| ENSG00000249558 | 5.13E-15 | -2.63127 | 1 | 1 RCC2P4         | --     |
| ENSG00000249563 | 5.13E-15 | -2.63127 | 1 | 1 RP11-751L19.1  | --     |
| ENSG00000249564 | 5.13E-15 | -2.63127 | 1 | 1 RP11-390C19.1  | --     |
| ENSG00000249568 | 5.13E-15 | -2.63127 | 1 | 1 RP11-234O6.2   | --     |
| ENSG00000249574 | 5.13E-15 | -2.63127 | 1 | 1 AC226118.1     | --     |
| ENSG00000249577 | 5.13E-15 | -2.63127 | 1 | 1 CTD-2195M15.1  | --     |
| ENSG00000249579 | 5.13E-15 | -2.63127 | 1 | 1 RP11-586E1.1   | --     |
| ENSG00000249580 | 5.13E-15 | -2.63127 | 1 | 1 RP11-52L11.6   | --     |
| ENSG00000249581 | 5.13E-15 | -2.63127 | 1 | 1 CLRN2          | --     |
| ENSG00000249582 | 5.13E-15 | -2.63127 | 1 | 1 RPL7L1P4       | --     |
| ENSG00000249584 | 5.13E-15 | -2.63127 | 1 | 1 RP11-478P10.1  | --     |
| ENSG00000249588 | 5.13E-15 | -2.63127 | 1 | 1 CTC-537E7.1    | --     |
| ENSG00000249590 | 5.13E-15 | -2.63127 | 1 | 1 RP4-539M6.19   | K17981 |
| ENSG00000249595 | 5.13E-15 | -2.63127 | 1 | 1 AC004878.7     | --     |
| ENSG00000249599 | 5.13E-15 | -2.63127 | 1 | 1 RP11-168E14.1  | --     |
| ENSG00000249600 | 5.13E-15 | -2.63127 | 1 | 1 RP11-510I6.3   | K02896 |
| ENSG00000249601 | 5.13E-15 | -2.63127 | 1 | 1 CTB-27N1.1     | --     |
| ENSG00000249604 | 5.13E-15 | -2.63127 | 1 | 1 RP11-286E11.2  | --     |

|                 |          |          |   |                  |        |
|-----------------|----------|----------|---|------------------|--------|
| ENSG00000249605 | 5.13E-15 | -2.63127 | 1 | 1 CTC-218H9.1    | -      |
| ENSG00000249606 | 5.13E-15 | -2.63127 | 1 | 1 TRAPPC2P7      | -      |
| ENSG00000249607 | 5.13E-15 | -2.63127 | 1 | 1 RP11-197O8.1   | K04969 |
| ENSG00000249613 | 5.13E-15 | -2.63127 | 1 | 1 RP13-612N21.1  | -      |
| ENSG00000249614 | 5.13E-15 | -2.63127 | 1 | 1 RP11-703G6.1   | -      |
| ENSG00000249616 | 5.13E-15 | -2.63127 | 1 | 1 CTD-2194F12.1  | K05868 |
| ENSG00000249617 | 5.13E-15 | -2.63127 | 1 | 1 RP11-366M4.17  | K02947 |
| ENSG00000249618 | 5.13E-15 | -2.63127 | 1 | 1 RP11-422J15.1  | -      |
| ENSG00000249619 | 5.13E-15 | -2.63127 | 1 | 1 HMGN1P13       | K11299 |
| ENSG00000249620 | 5.13E-15 | -2.63127 | 1 | 1 RP11-321E2.10  | K11253 |
| ENSG00000249621 | 5.13E-15 | -2.63127 | 1 | 1 CTD-2544H17.1  | -      |
| ENSG00000249627 | 5.13E-15 | -2.63127 | 1 | 1 RP11-312A15.1  | K05659 |
| ENSG00000249631 | 5.13E-15 | -2.63127 | 1 | 1 RP11-281P23.2  | -      |
| ENSG00000249633 | 5.13E-15 | -2.63127 | 1 | 1 OR52V1P        | K04257 |
| ENSG00000249634 | 5.13E-15 | -2.63127 | 1 | 1 USP9YP5        | -      |
| ENSG00000249635 | 5.13E-15 | -2.63127 | 1 | 1 RP11-710F7.3   | -      |
| ENSG00000249638 | 5.13E-15 | -2.63127 | 1 | 1 CTD-2296D1.3   | -      |
| ENSG00000249639 | 5.13E-15 | -2.63127 | 1 | 1 CTB-138E5.1    | -      |
| ENSG00000249642 | 5.13E-15 | -2.63127 | 1 | 1 RP11-565A3.1   | -      |
| ENSG00000249643 | 5.13E-15 | -2.63127 | 1 | 1 RP11-436H11.6  | -      |
| ENSG00000249645 | 5.13E-15 | -2.63127 | 1 | 1 RP11-552M14.1  | -      |
| ENSG00000249646 | 5.13E-15 | -2.63127 | 1 | 1 OR7E94P        | K04257 |
| ENSG00000249647 | 5.13E-15 | -2.63127 | 1 | 1 CTC-349C3.2    | -      |
| ENSG00000249649 | 5.13E-15 | -2.63127 | 1 | 1 MRPS33P2       | K17411 |
| ENSG00000249654 | 5.13E-15 | -2.63127 | 1 | 1 VN1R104P       | K04614 |
| ENSG00000249658 | 5.13E-15 | -2.63127 | 1 | 1 RP11-1018N14.4 | -      |
| ENSG00000249662 | 5.13E-15 | -2.63127 | 1 | 1 RP11-321E2.4   | -      |
| ENSG00000249666 | 5.13E-15 | -2.63127 | 1 | 1 RP11-432M8.12  | K03135 |
| ENSG00000249667 | 5.13E-15 | -2.63127 | 1 | 1 RP11-213G21.1  | -      |
| ENSG00000249668 | 5.13E-15 | -2.63127 | 1 | 1 KRT18P56       | K07604 |
| ENSG00000249669 | 5.13E-15 | -2.63127 | 1 | 1 MIR143HG       | -      |
| ENSG00000249675 | 5.13E-15 | -2.63127 | 1 | 1 RP11-217C7.1   | -      |
| ENSG00000249677 | 5.13E-15 | -2.63127 | 1 | 1 RP11-395P13.3  | -      |
| ENSG00000249681 | 5.13E-15 | -2.63127 | 1 | 1 KRT19P3        | K07604 |
| ENSG00000249686 | 5.13E-15 | -2.63127 | 1 | 1 RP11-790I12.4  | K00699 |
| ENSG00000249688 | 5.13E-15 | -2.63127 | 1 | 1 RP11-5N11.7    | -      |
| ENSG00000249689 | 5.13E-15 | -2.63127 | 1 | 1 AC138517.5     | K06928 |
| ENSG00000249692 | 5.13E-15 | -2.63127 | 1 | 1 RP11-21G20.4   | -      |
| ENSG00000249693 | 5.13E-15 | -2.63127 | 1 | 1 THEGL          | -      |
| ENSG00000249694 | 5.13E-15 | -2.63127 | 1 | 1 RP11-378A12.1  | -      |
| ENSG00000249695 | 5.13E-15 | -2.63127 | 1 | 1 RP11-598F7.4   | -      |
| ENSG00000249697 | 5.13E-15 | -2.63127 | 1 | 1 RP11-155L15.1  | -      |
| ENSG00000249698 | 5.13E-15 | -2.63127 | 1 | 1 RP11-627H22.8  | -      |
| ENSG00000249699 | 5.13E-15 | -2.63127 | 1 | 1 RP11-415C15.2  | -      |
| ENSG00000249706 | 5.13E-15 | -2.63127 | 1 | 1 RP11-89B16.1   | -      |
| ENSG00000249708 | 5.13E-15 | -2.63127 | 1 | 1 RP11-503L23.1  | -      |
| ENSG00000249710 | 5.13E-15 | -2.63127 | 1 | 1 RP11-588P8.1   | -      |
| ENSG00000249713 | 5.13E-15 | -2.63127 | 1 | 1 CTD-2236F14.1  | -      |
| ENSG00000249717 | 5.13E-15 | -2.63127 | 1 | 1 RP11-44F21.3   | -      |
| ENSG00000249721 | 5.13E-15 | -2.63127 | 1 | 1 RP11-83M16.4   | -      |
| ENSG00000249722 | 5.13E-15 | -2.63127 | 1 | 1 CTC-430J12.2   | -      |
| ENSG00000249725 | 5.13E-15 | -2.63127 | 1 | 1 RP11-469L4.1   | -      |
| ENSG00000249726 | 5.13E-15 | -2.63127 | 1 | 1 TUBB1P1        | K07375 |
| ENSG00000249727 | 5.13E-15 | -2.63127 | 1 | 1 RP11-273B19.2  | -      |
| ENSG00000249729 | 5.13E-15 | -2.63127 | 1 | 1 RP11-55C6.1    | -      |
| ENSG00000249730 | 5.13E-15 | -2.63127 | 1 | 1 OR10J4         | K04257 |
| ENSG00000249731 | 5.13E-15 | -2.63127 | 1 | 1 RP11-259O2.3   | -      |
| ENSG00000249734 | 5.13E-15 | -2.63127 | 1 | 1 RP11-332J15.1  | -      |

|                 |          |          |   |                  |        |
|-----------------|----------|----------|---|------------------|--------|
| ENSG00000249735 | 5.13E-15 | -2.63127 | 1 | 1 RP11-468N14.12 | K00699 |
| ENSG00000249736 | 5.13E-15 | -2.63127 | 1 | 1 RP11-83M16.5   | -      |
| ENSG00000249737 | 5.13E-15 | -2.63127 | 1 | 1 RP1-167G20.2   | -      |
| ENSG00000249738 | 5.13E-15 | -2.63127 | 1 | 1 AC008697.1     | -      |
| ENSG00000249741 | 5.13E-15 | -2.63127 | 1 | 1 RP11-673E1.3   | K16686 |
| ENSG00000249742 | 5.13E-15 | -2.63127 | 1 | 1 RP11-217E13.1  | -      |
| ENSG00000249743 | 5.13E-15 | -2.63127 | 1 | 1 RP11-60A8.1    | -      |
| ENSG00000249744 | 5.13E-15 | -2.63127 | 1 | 1 CTD-2057J6.2   | -      |
| ENSG00000249745 | 5.13E-15 | -2.63127 | 1 | 1 HMGB1P28       | K10802 |
| ENSG00000249746 | 5.13E-15 | -2.63127 | 1 | 1 RP11-254I22.3  | -      |
| ENSG00000249747 | 5.13E-15 | -2.63127 | 1 | 1 RP11-308K2.1   | -      |
| ENSG00000249748 | 5.13E-15 | -2.63127 | 1 | 1 RP11-79C6.3    | -      |
| ENSG00000249751 | 5.13E-15 | -2.63127 | 1 | 1 ECSCR          | -      |
| ENSG00000249752 | 5.13E-15 | -2.63127 | 1 | 1 RP11-563M4.1   | -      |
| ENSG00000249754 | 5.13E-15 | -2.63127 | 1 | 1 RP11-425I13.2  | K03960 |
| ENSG00000249761 | 5.13E-15 | -2.63127 | 1 | 1 CTD-2278B20.1  | K10704 |
| ENSG00000249763 | 5.13E-15 | -2.63127 | 1 | 1 RP11-618I10.1  | K00699 |
| ENSG00000249764 | 5.13E-15 | -2.63127 | 1 | 1 RP11-1299A16.1 | -      |
| ENSG00000249766 | 5.13E-15 | -2.63127 | 1 | 1 RP11-802H3.1   | -      |
| ENSG00000249767 | 5.13E-15 | -2.63127 | 1 | 1 ENPP7P10       | K12354 |
| ENSG00000249768 | 5.13E-15 | -2.63127 | 1 | 1 HSPE1P10       | K04078 |
| ENSG00000249770 | 5.13E-15 | -2.63127 | 1 | 1 MTND6P17       | -      |
| ENSG00000249772 | 5.13E-15 | -2.63127 | 1 | 1 CTD-2193P3.2   | -      |
| ENSG00000249773 | 5.13E-15 | -2.63127 | 1 | 1 MRPS17         | K02961 |
| ENSG00000249774 | 5.13E-15 | -2.63127 | 1 | 1 CTD-2206G10.2  | K17771 |
| ENSG00000249776 | 5.13E-15 | -2.63127 | 1 | 1 RP11-133F8.2   | -      |
| ENSG00000249777 | 5.13E-15 | -2.63127 | 1 | 1 CTC-235G5.1    | K14324 |
| ENSG00000249778 | 5.13E-15 | -2.63127 | 1 | 1 TRMT112P2      | K15448 |
| ENSG00000249779 | 5.13E-15 | -2.63127 | 1 | 1 RP11-447H19.3  | K00802 |
| ENSG00000249780 | 5.13E-15 | -2.63127 | 1 | 1 RP11-352E6.2   | K02262 |
| ENSG00000249781 | 5.13E-15 | -2.63127 | 1 | 1 CTD-2143L24.1  | -      |
| ENSG00000249782 | 5.13E-15 | -2.63127 | 1 | 1 RP11-417J1.1   | -      |
| ENSG00000249785 | 5.13E-15 | -2.63127 | 1 | 1 CTD-2061E9.1   | -      |
| ENSG00000249787 | 5.13E-15 | -2.63127 | 1 | 1 RP11-346J10.1  | -      |
| ENSG00000249790 | 5.13E-15 | -2.63127 | 1 | 1 RP11-20D14.6   | -      |
| ENSG00000249791 | 5.13E-15 | -2.63127 | 1 | 1 CTC-428G20.2   | -      |
| ENSG00000249792 | 5.13E-15 | -2.63127 | 1 | 1 RP11-1072N2.3  | -      |
| ENSG00000249795 | 5.13E-15 | -2.63127 | 1 | 1 RP11-18O11.2   | K00657 |
| ENSG00000249797 | 5.13E-15 | -2.63127 | 1 | 1 CTD-3179P9.1   | -      |
| ENSG00000249798 | 5.13E-15 | -2.63127 | 1 | 1 HSD3BP3        | K00070 |
| ENSG00000249799 | 5.13E-15 | -2.63127 | 1 | 1 RP11-264E23.1  | K11095 |
| ENSG00000249806 | 5.13E-15 | -2.63127 | 1 | 1 RP11-223C24.1  | -      |
| ENSG00000249807 | 5.13E-15 | -2.63127 | 1 | 1 CTD-2199O4.1   | -      |
| ENSG00000249808 | 5.13E-15 | -2.63127 | 1 | 1 CTD-2029E14.1  | -      |
| ENSG00000249811 | 5.13E-15 | -2.63127 | 1 | 1 USP17L21       | K11845 |
| ENSG00000249816 | 5.13E-15 | -2.63127 | 1 | 1 LINC00964      | -      |
| ENSG00000249818 | 5.13E-15 | -2.63127 | 1 | 1 RP11-73G16.3   | -      |
| ENSG00000249819 | 5.13E-15 | -2.63127 | 1 | 1 RP11-392C20.1  | K11656 |
| ENSG00000249820 | 5.13E-15 | -2.63127 | 1 | 1 RP11-503I22.2  | K15185 |
| ENSG00000249825 | 5.13E-15 | -2.63127 | 1 | 1 CTD-2201I18.1  | -      |
| ENSG00000249828 | 5.13E-15 | -2.63127 | 1 | 1 RP11-1281K21.2 | K17299 |
| ENSG00000249829 | 5.13E-15 | -2.63127 | 1 | 1 CTC-422A18.1   | -      |
| ENSG00000249830 | 5.13E-15 | -2.63127 | 1 | 1 RP11-121L11.3  | -      |
| ENSG00000249833 | 5.13E-15 | -2.63127 | 1 | 1 RP11-71E19.5   | -      |
| ENSG00000249834 | 5.13E-15 | -2.63127 | 1 | 1 PGBD4P3        | -      |
| ENSG00000249835 | 5.13E-15 | -2.63127 | 1 | 1 VCAN-AS1       | -      |
| ENSG00000249837 | 5.13E-15 | -2.63127 | 1 | 1 CTD-2325B11.1  | -      |
| ENSG00000249838 | 5.13E-15 | -2.63127 | 1 | 1 SUMO2P7        | K12160 |

|                 |          |          |   |                  |        |
|-----------------|----------|----------|---|------------------|--------|
| ENSG00000249842 | 5.13E-15 | -2.63127 | 1 | 1 CTD-2331D11.4  | -      |
| ENSG00000249843 | 5.13E-15 | -2.63127 | 1 | 1 RP11-45H22.2   | -      |
| ENSG00000249844 | 5.13E-15 | -2.63127 | 1 | 1 OR7E43P        | K04257 |
| ENSG00000249846 | 5.13E-15 | -2.63127 | 1 | 1 RP11-77P16.4   | -      |
| ENSG00000249847 | 5.13E-15 | -2.63127 | 1 | 1 RP11-192C21.2  | -      |
| ENSG00000249848 | 5.13E-15 | -2.63127 | 1 | 1 RP11-212F11.1  | K18157 |
| ENSG00000249849 | 5.13E-15 | -2.63127 | 1 | 1 RP11-1101H11.1 | -      |
| ENSG00000249851 | 5.13E-15 | -2.63127 | 1 | 1 RP11-166J22.1  | K02977 |
| ENSG00000249854 | 5.13E-15 | -2.63127 | 1 | 1 RP11-420O16.1  | -      |
| ENSG00000249856 | 5.13E-15 | -2.63127 | 1 | 1 CTD-2503O16.4  | -      |
| ENSG00000249857 | 5.13E-15 | -2.63127 | 1 | 1 CTD-2227C6.3   | -      |
| ENSG00000249858 | 5.13E-15 | -2.63127 | 1 | 1 SNX5P1         | K17920 |
| ENSG00000249860 | 5.13E-15 | -2.63127 | 1 | 1 MTRNR2L5       | K01982 |
| ENSG00000249861 | 5.13E-15 | -2.63127 | 1 | 1 LGALS16        | K10096 |
| ENSG00000249865 | 5.13E-15 | -2.63127 | 1 | 1 CTD-2296D1.4   | -      |
| ENSG00000249866 | 5.13E-15 | -2.63127 | 1 | 1 OR7E83P        | K04257 |
| ENSG00000249867 | 5.13E-15 | -2.63127 | 1 | 1 RP11-115J23.1  | -      |
| ENSG00000249869 | 5.13E-15 | -2.63127 | 1 | 1 RP11-93K22.7   | K04257 |
| ENSG00000249873 | 5.13E-15 | -2.63127 | 1 | 1 RP11-983C2.2   | -      |
| ENSG00000249875 | 5.13E-15 | -2.63127 | 1 | 1 RP11-51M24.1   | -      |
| ENSG00000249876 | 5.13E-15 | -2.63127 | 1 | 1 CTC-563A5.4    | K09512 |
| ENSG00000249877 | 5.13E-15 | -2.63127 | 1 | 1 RP11-706F1.2   | -      |
| ENSG00000249878 | 5.13E-15 | -2.63127 | 1 | 1 CTD-2244C20.1  | K05692 |
| ENSG00000249881 | 5.13E-15 | -2.63127 | 1 | 1 CTB-57H20.1    | -      |
| ENSG00000249882 | 5.13E-15 | -2.63127 | 1 | 1 RP11-665I14.1  | -      |
| ENSG00000249883 | 5.13E-15 | -2.63127 | 1 | 1 RP11-460H9.1   | -      |
| ENSG00000249884 | 5.13E-15 | -2.63127 | 1 | 1 RNF103-CHMP3   | K12193 |
| ENSG00000249885 | 5.13E-15 | -2.63127 | 1 | 1 ARHGGEF38-IT1  | -      |
| ENSG00000249887 | 5.13E-15 | -2.63127 | 1 | 1 RP11-457P14.6  | K10303 |
| ENSG00000249888 | 5.13E-15 | -2.63127 | 1 | 1 RP11-447H19.2  | -      |
| ENSG00000249890 | 5.13E-15 | -2.63127 | 1 | 1 RP11-813N20.2  | K00699 |
| ENSG00000249891 | 5.13E-15 | -2.63127 | 1 | 1 KRT19P6        | -      |
| ENSG00000249892 | 5.13E-15 | -2.63127 | 1 | 1 RP11-525J21.1  | -      |
| ENSG00000249893 | 5.13E-15 | -2.63127 | 1 | 1 MTND6P16       | -      |
| ENSG00000249894 | 5.13E-15 | -2.63127 | 1 | 1 RP11-434D9.2   | -      |
| ENSG00000249896 | 5.13E-15 | -2.63127 | 1 | 1 RP11-586D19.1  | -      |
| ENSG00000249901 | 5.13E-15 | -2.63127 | 1 | 1 RP11-781M16.2  | -      |
| ENSG00000249904 | 5.13E-15 | -2.63127 | 1 | 1 CTC-394G3.2    | -      |
| ENSG00000249906 | 5.13E-15 | -2.63127 | 1 | 1 RP5-1029K10.2  | -      |
| ENSG00000249909 | 5.13E-15 | -2.63127 | 1 | 1 CYCTP          | K08738 |
| ENSG00000249910 | 5.13E-15 | -2.63127 | 1 | 1 TRIM51CP       | K12019 |
| ENSG00000249912 | 5.13E-15 | -2.63127 | 1 | 1 TRBV26         | -      |
| ENSG00000249916 | 5.13E-15 | -2.63127 | 1 | 1 CTD-2280E9.1   | -      |
| ENSG00000249917 | 5.13E-15 | -2.63127 | 1 | 1 LINC00536      | -      |
| ENSG00000249919 | 5.13E-15 | -2.63127 | 1 | 1 FABP5P6        | K08754 |
| ENSG00000249920 | 5.13E-15 | -2.63127 | 1 | 1 HNRNPA1P55     | K12741 |
| ENSG00000249921 | 5.13E-15 | -2.63127 | 1 | 1 CTC-329H14.1   | K14753 |
| ENSG00000249924 | 5.13E-15 | -2.63127 | 1 | 1 RP11-27G13.1   | -      |
| ENSG00000249926 | 5.13E-15 | -2.63127 | 1 | 1 RP11-495K9.6   | -      |
| ENSG00000249927 | 5.13E-15 | -2.63127 | 1 | 1 CTD-2151L9.2   | -      |
| ENSG00000249928 | 5.13E-15 | -2.63127 | 1 | 1 UQCRBP3        | -      |
| ENSG00000249930 | 5.13E-15 | -2.63127 | 1 | 1 AC007016.3     | K00134 |
| ENSG00000249931 | 5.13E-15 | -2.63127 | 1 | 1 GOLGA8K        | K10595 |
| ENSG00000249932 | 5.13E-15 | -2.63127 | 1 | 1 RP11-395P13.2  | -      |
| ENSG00000249941 | 5.13E-15 | -2.63127 | 1 | 1 CTD-2046I8.1   | -      |
| ENSG00000249942 | 5.13E-15 | -2.63127 | 1 | 1 AC142293.3     | -      |
| ENSG00000249943 | 5.13E-15 | -2.63127 | 1 | 1 RP11-213L8.1   | -      |
| ENSG00000249944 | 5.13E-15 | -2.63127 | 1 | 1 CTB-161J7.1    | -      |

|                 |          |          |   |                  |        |
|-----------------|----------|----------|---|------------------|--------|
| ENSG00000249945 | 5.13E-15 | -2.63127 | 1 | 1 RP11-598D14.1  | -      |
| ENSG00000249947 | 5.13E-15 | -2.63127 | 1 | 1 XBP1P1         | K09027 |
| ENSG00000249948 | 5.13E-15 | -2.63127 | 1 | 1 GBA3           | K05350 |
| ENSG00000249950 | 5.13E-15 | -2.63127 | 1 | 1 CTC-394G3.1    | -      |
| ENSG00000249951 | 5.13E-15 | -2.63127 | 1 | 1 RP11-554D13.1  | -      |
| ENSG00000249955 | 5.13E-15 | -2.63127 | 1 | 1 RP11-6E9.4     | -      |
| ENSG00000249956 | 5.13E-15 | -2.63127 | 1 | 1 RP11-790I12.2  | K00699 |
| ENSG00000249958 | 5.13E-15 | -2.63127 | 1 | 1 CCT7P2         | K09499 |
| ENSG00000249959 | 5.13E-15 | -2.63127 | 1 | 1 RP11-252I13.2  | -      |
| ENSG00000249960 | 5.13E-15 | -2.63127 | 1 | 1 RP11-791G16.5  | K11462 |
| ENSG00000249961 | 5.13E-15 | -2.63127 | 1 | 1 CCDC79         | -      |
| ENSG00000249962 | 5.13E-15 | -2.63127 | 1 | 1 RP11-80H5.5    | K09680 |
| ENSG00000249963 | 5.13E-15 | -2.63127 | 1 | 1 EEF1A1P20      | K03231 |
| ENSG00000249965 | 5.13E-15 | -2.63127 | 1 | 1 CDC42P4        | K04393 |
| ENSG00000249966 | 5.13E-15 | -2.63127 | 1 | 1 CTD-2194D22.1  | -      |
| ENSG00000249967 | 5.13E-15 | -2.63127 | 1 | 1 PI4K2A         | K13711 |
| ENSG00000249970 | 5.13E-15 | -2.63127 | 1 | 1 RP11-622A1.1   | K02872 |
| ENSG00000249971 | 5.13E-15 | -2.63127 | 1 | 1 RP11-256P1.1   | -      |
| ENSG00000249973 | 5.13E-15 | -2.63127 | 1 | 1 CHCHD2P7       | -      |
| ENSG00000249975 | 5.13E-15 | -2.63127 | 1 | 1 OR5H3P         | K04257 |
| ENSG00000249976 | 5.13E-15 | -2.63127 | 1 | 1 RP11-580P21.1  | -      |
| ENSG00000249977 | 5.13E-15 | -2.63127 | 1 | 1 RP11-155G15.3  | K12845 |
| ENSG00000249978 | 5.13E-15 | -2.63127 | 1 | 1 TRGV7          | -      |
| ENSG00000249981 | 5.13E-15 | -2.63127 | 1 | 1 RP11-136K7.1   | -      |
| ENSG00000249982 | 5.13E-15 | -2.63127 | 1 | 1 RP11-1018N14.3 | -      |
| ENSG00000249984 | 5.13E-15 | -2.63127 | 1 | 1 CTC-529L17.2   | -      |
| ENSG00000249985 | 5.13E-15 | -2.63127 | 1 | 1 RP11-468N14.8  | K00699 |
| ENSG00000249987 | 5.13E-15 | -2.63127 | 1 | 1 RPS4XP20       | K02987 |
| ENSG00000249988 | 5.13E-15 | -2.63127 | 1 | 1 RP11-669M16.1  | -      |
| ENSG00000249990 | 5.13E-15 | -2.63127 | 1 | 1 RP11-474J18.2  | -      |
| ENSG00000249993 | 5.13E-15 | -2.63127 | 1 | 1 BFSP2-AS1      | -      |
| ENSG00000249994 | 5.13E-15 | -2.63127 | 1 | 1 CTD-2383I20.1  | -      |
| ENSG00000249995 | 5.13E-15 | -2.63127 | 1 | 1 RP11-352E6.1   | -      |
| ENSG00000249996 | 5.13E-15 | -2.63127 | 1 | 1 RP11-359P5.1   | -      |
| ENSG00000249997 | 5.13E-15 | -2.63127 | 1 | 1 AC068137.8     | -      |
| ENSG00000249998 | 5.13E-15 | -2.63127 | 1 | 1 RP11-141E13.1  | -      |
| ENSG00000250001 | 5.13E-15 | -2.63127 | 1 | 1 CTD-2201E9.2   | -      |
| ENSG00000250003 | 5.13E-15 | -2.63127 | 1 | 1 CTD-2116N24.1  | -      |
| ENSG00000250006 | 5.13E-15 | -2.63127 | 1 | 1 CTB-179I1.1    | -      |
| ENSG00000250007 | 5.13E-15 | -2.63127 | 1 | 1 RP11-814P5.1   | -      |
| ENSG00000250011 | 5.13E-15 | -2.63127 | 1 | 1 HMGB1P3        | K15413 |
| ENSG00000250013 | 5.13E-15 | -2.63127 | 1 | 1 RP11-456A14.1  | -      |
| ENSG00000250015 | 5.13E-15 | -2.63127 | 1 | 1 CTC-339F2.2    | -      |
| ENSG00000250016 | 5.13E-15 | -2.63127 | 1 | 1 SNX18P23       | K17299 |
| ENSG00000250017 | 5.13E-15 | -2.63127 | 1 | 1 RP11-484L7.2   | -      |
| ENSG00000250020 | 5.13E-15 | -2.63127 | 1 | 1 RP11-811I15.1  | K09440 |
| ENSG00000250024 | 5.13E-15 | -2.63127 | 1 | 1 RP11-818C3.1   | -      |
| ENSG00000250025 | 5.13E-15 | -2.63127 | 1 | 1 CTC-359M8.1    | -      |
| ENSG00000250026 | 5.13E-15 | -2.63127 | 1 | 1 RP11-646E20.6  | K09751 |
| ENSG00000250030 | 5.13E-15 | -2.63127 | 1 | 1 RP11-584P21.4  | K12581 |
| ENSG00000250031 | 5.13E-15 | -2.63127 | 1 | 1 RP11-114M5.1   | K07293 |
| ENSG00000250032 | 5.13E-15 | -2.63127 | 1 | 1 CTD-2194L12.3  | -      |
| ENSG00000250034 | 5.13E-15 | -2.63127 | 1 | 1 RP11-793B23.1  | -      |
| ENSG00000250036 | 5.13E-15 | -2.63127 | 1 | 1 IGKV1D-37      | -      |
| ENSG00000250037 | 5.13E-15 | -2.63127 | 1 | 1 RP11-480D4.4   | -      |
| ENSG00000250038 | 5.13E-15 | -2.63127 | 1 | 1 RP11-180C1.1   | -      |
| ENSG00000250039 | 5.13E-15 | -2.63127 | 1 | 1 RP11-17E2.2    | -      |
| ENSG00000250040 | 5.13E-15 | -2.63127 | 1 | 1 AC006499.8     | K04366 |

|                 |          |          |   |                 |        |
|-----------------|----------|----------|---|-----------------|--------|
| ENSG00000250042 | 5.13E-15 | -2.63127 | 1 | 1 RP11-91J3.2   | -      |
| ENSG00000250043 | 5.13E-15 | -2.63127 | 1 | 1 RP11-161D15.2 | -      |
| ENSG00000250045 | 5.13E-15 | -2.63127 | 1 | 1 CBX3P3        | K11586 |
| ENSG00000250046 | 5.13E-15 | -2.63127 | 1 | 1 RP11-148B6.2  | -      |
| ENSG00000250048 | 5.13E-15 | -2.63127 | 1 | 1 LINC00603     | -      |
| ENSG00000250049 | 5.13E-15 | -2.63127 | 1 | 1 RP11-348J24.2 | -      |
| ENSG00000250053 | 5.13E-15 | -2.63127 | 1 | 1 RARRES2P4     | K10044 |
| ENSG00000250055 | 5.13E-15 | -2.63127 | 1 | 1 RP11-321E2.8  | K03135 |
| ENSG00000250056 | 5.13E-15 | -2.63127 | 1 | 1 LINC01018     | -      |
| ENSG00000250057 | 5.13E-15 | -2.63127 | 1 | 1 RP11-576N17.5 | -      |
| ENSG00000250060 | 5.13E-15 | -2.63127 | 1 | 1 RP11-332J15.2 | -      |
| ENSG00000250061 | 5.13E-15 | -2.63127 | 1 | 1 RP11-541P9.3  | -      |
| ENSG00000250062 | 5.13E-15 | -2.63127 | 1 | 1 RP11-778J15.1 | -      |
| ENSG00000250064 | 5.13E-15 | -2.63127 | 1 | 1 RP11-123O22.1 | -      |
| ENSG00000250066 | 5.13E-15 | -2.63127 | 1 | 1 RP11-141O11.1 | -      |
| ENSG00000250071 | 5.13E-15 | -2.63127 | 1 | 1 CTD-2060C23.1 | K05757 |
| ENSG00000250074 | 5.13E-15 | -2.63127 | 1 | 1 AC006499.4    | K07375 |
| ENSG00000250076 | 5.13E-15 | -2.63127 | 1 | 1 RP11-141P6.1  | K10436 |
| ENSG00000250078 | 5.13E-15 | -2.63127 | 1 | 1 RP11-577G20.2 | -      |
| ENSG00000250079 | 5.13E-15 | -2.63127 | 1 | 1 RP11-560A7.1  | K10172 |
| ENSG00000250080 | 5.13E-15 | -2.63127 | 1 | 1 CTB-88F18.2   | K13190 |
| ENSG00000250082 | 5.13E-15 | -2.63127 | 1 | 1 RP11-796L2.1  | -      |
| ENSG00000250084 | 5.13E-15 | -2.63127 | 1 | 1 RP11-485B17.5 | -      |
| ENSG00000250088 | 5.13E-15 | -2.63127 | 1 | 1 RP11-432M8.1  | -      |
| ENSG00000250090 | 5.13E-15 | -2.63127 | 1 | 1 RP13-401N8.3  | K09228 |
| ENSG00000250092 | 5.13E-15 | -2.63127 | 1 | 1 RP11-556G22.3 | -      |
| ENSG00000250095 | 5.13E-15 | -2.63127 | 1 | 1 NREP-AS1      | -      |
| ENSG00000250098 | 5.13E-15 | -2.63127 | 1 | 1 RP11-22A3.1   | -      |
| ENSG00000250099 | 5.13E-15 | -2.63127 | 1 | 1 RP11-12P19.2  | K04969 |
| ENSG00000250100 | 5.13E-15 | -2.63127 | 1 | 1 RP13-644M16.3 | K00699 |
| ENSG00000250101 | 5.13E-15 | -2.63127 | 1 | 1 RP11-1252I4.2 | -      |
| ENSG00000250102 | 5.13E-15 | -2.63127 | 1 | 1 RP11-314N14.1 | -      |
| ENSG00000250103 | 5.13E-15 | -2.63127 | 1 | 1 RP11-380D23.2 | -      |
| ENSG00000250105 | 5.13E-15 | -2.63127 | 1 | 1 CTD-3074O7.2  | -      |
| ENSG00000250107 | 5.13E-15 | -2.63127 | 1 | 1 CACNA1G-AS1   | -      |
| ENSG00000250113 | 5.13E-15 | -2.63127 | 1 | 1 RP13-221M14.6 | -      |
| ENSG00000250114 | 5.13E-15 | -2.63127 | 1 | 1 CTB-95B16.1   | K18754 |
| ENSG00000250115 | 5.13E-15 | -2.63127 | 1 | 1 AK3P2         | K00944 |
| ENSG00000250118 | 5.13E-15 | -2.63127 | 1 | 1 RP11-136H13.2 | K10416 |
| ENSG00000250120 | 5.13E-15 | -2.63127 | 1 | 1 PCDHA10       | K16493 |
| ENSG00000250122 | 5.13E-15 | -2.63127 | 1 | 1 CTD-2013M15.1 | -      |
| ENSG00000250124 | 5.13E-15 | -2.63127 | 1 | 1 CTC-261N6.2   | -      |
| ENSG00000250125 | 5.13E-15 | -2.63127 | 1 | 1 RP11-707A18.1 | -      |
| ENSG00000250126 | 5.13E-15 | -2.63127 | 1 | 1 RP13-884E18.2 | -      |
| ENSG00000250127 | 5.13E-15 | -2.63127 | 1 | 1 CTD-2117L12.1 | K12581 |
| ENSG00000250129 | 5.13E-15 | -2.63127 | 1 | 1 RP11-265F19.1 | -      |
| ENSG00000250135 | 5.13E-15 | -2.63127 | 1 | 1 RP4-622L5.2   | -      |
| ENSG00000250137 | 5.13E-15 | -2.63127 | 1 | 1 RP11-380P13.1 | -      |
| ENSG00000250138 | 5.13E-15 | -2.63127 | 1 | 1 RP11-848G14.5 | -      |
| ENSG00000250141 | 5.13E-15 | -2.63127 | 1 | 1 RP11-208N20.1 | -      |
| ENSG00000250144 | 5.13E-15 | -2.63127 | 1 | 1 RP11-553P9.1  | K03231 |
| ENSG00000250145 | 5.13E-15 | -2.63127 | 1 | 1 CTD-2285G11.1 | K09228 |
| ENSG00000250147 | 5.13E-15 | -2.63127 | 1 | 1 MORF4L2P1     | K11342 |
| ENSG00000250148 | 5.13E-15 | -2.63127 | 1 | 1 KRT8P31       | K07605 |
| ENSG00000250149 | 5.13E-15 | -2.63127 | 1 | 1 RP11-399F2.2  | -      |
| ENSG00000250150 | 5.13E-15 | -2.63127 | 1 | 1 RP11-436A7.1  | -      |
| ENSG00000250156 | 5.13E-15 | -2.63127 | 1 | 1 CTC-498M16.2  | -      |
| ENSG00000250158 | 5.13E-15 | -2.63127 | 1 | 1 RP11-254I22.2 | -      |

|                 |          |          |   |                  |        |
|-----------------|----------|----------|---|------------------|--------|
| ENSG00000250161 | 5.13E-15 | -2.63127 | 1 | 1 TRMT112P5      | -      |
| ENSG00000250162 | 5.13E-15 | -2.63127 | 1 | 1 CSNK1A1P3      | K08957 |
| ENSG00000250164 | 5.13E-15 | -2.63127 | 1 | 1 RP11-5N11.6    | -      |
| ENSG00000250166 | 5.13E-15 | -2.63127 | 1 | 1 RP11-268P4.5   | -      |
| ENSG00000250167 | 5.13E-15 | -2.63127 | 1 | 1 CTC-321K16.1   | -      |
| ENSG00000250169 | 5.13E-15 | -2.63127 | 1 | 1 MTND5P13       | -      |
| ENSG00000250170 | 5.13E-15 | -2.63127 | 1 | 1 RASA2-IT1      | -      |
| ENSG00000250173 | 5.13E-15 | -2.63127 | 1 | 1 RP11-661C8.3   | -      |
| ENSG00000250174 | 5.13E-15 | -2.63127 | 1 | 1 MYLK-AS2       | -      |
| ENSG00000250180 | 5.13E-15 | -2.63127 | 1 | 1 RP11-138A23.2  | -      |
| ENSG00000250183 | 5.13E-15 | -2.63127 | 1 | 1 RP11-96A1.4    | -      |
| ENSG00000250185 | 5.13E-15 | -2.63127 | 1 | 1 RCC2P8         | -      |
| ENSG00000250186 | 5.13E-15 | -2.63127 | 1 | 1 RP11-1079K10.4 | -      |
| ENSG00000250189 | 5.13E-15 | -2.63127 | 1 | 1 RP11-362F19.2  | K09228 |
| ENSG00000250190 | 5.13E-15 | -2.63127 | 1 | 1 RP11-292B1.2   | -      |
| ENSG00000250191 | 5.13E-15 | -2.63127 | 1 | 1 RP11-285A15.1  | -      |
| ENSG00000250193 | 5.13E-15 | -2.63127 | 1 | 1 RP11-419L4.1   | -      |
| ENSG00000250194 | 5.13E-15 | -2.63127 | 1 | 1 RP11-257I8.1   | -      |
| ENSG00000250195 | 5.13E-15 | -2.63127 | 1 | 1 RP11-371F15.3  | -      |
| ENSG00000250197 | 5.13E-15 | -2.63127 | 1 | 1 HMG1P15        | -      |
| ENSG00000250198 | 5.13E-15 | -2.63127 | 1 | 1 RP11-143A12.3  | -      |
| ENSG00000250200 | 5.13E-15 | -2.63127 | 1 | 1 RP13-577H12.3  | -      |
| ENSG00000250202 | 5.13E-15 | -2.63127 | 1 | 1 RP11-397E7.2   | -      |
| ENSG00000250204 | 5.13E-15 | -2.63127 | 1 | 1 AC006335.6     | -      |
| ENSG00000250205 | 5.13E-15 | -2.63127 | 1 | 1 YWHAEP4        | K06630 |
| ENSG00000250206 | 5.13E-15 | -2.63127 | 1 | 1 RP11-436H11.2  | -      |
| ENSG00000250207 | 5.13E-15 | -2.63127 | 1 | 1 AC079776.6     | -      |
| ENSG00000250210 | 5.13E-15 | -2.63127 | 1 | 1 RP11-585F1.10  | K16941 |
| ENSG00000250213 | 5.13E-15 | -2.63127 | 1 | 1 RP11-488I4.2   | -      |
| ENSG00000250214 | 5.13E-15 | -2.63127 | 1 | 1 RP13-488H8.1   | K02268 |
| ENSG00000250215 | 5.13E-15 | -2.63127 | 1 | 1 CIR1P2         | K06066 |
| ENSG00000250218 | 5.13E-15 | -2.63127 | 1 | 1 ALDH1L1-AS1    | -      |
| ENSG00000250219 | 5.13E-15 | -2.63127 | 1 | 1 LTV1P1         | -      |
| ENSG00000250221 | 5.13E-15 | -2.63127 | 1 | 1 KRT8P32        | K07605 |
| ENSG00000250223 | 5.13E-15 | -2.63127 | 1 | 1 EMCN-IT3       | -      |
| ENSG00000250227 | 5.13E-15 | -2.63127 | 1 | 1 TRIM60P14      | K12029 |
| ENSG00000250229 | 5.13E-15 | -2.63127 | 1 | 1 RP11-397D21.1  | K07750 |
| ENSG00000250230 | 5.13E-15 | -2.63127 | 1 | 1 RP11-855O10.2  | -      |
| ENSG00000250231 | 5.13E-15 | -2.63127 | 1 | 1 USP17L16P      | K11845 |
| ENSG00000250232 | 5.13E-15 | -2.63127 | 1 | 1 AF196779.12    | -      |
| ENSG00000250234 | 5.13E-15 | -2.63127 | 1 | 1 CTD-2024P10.1  | -      |
| ENSG00000250237 | 5.13E-15 | -2.63127 | 1 | 1 CTC-498J12.1   | -      |
| ENSG00000250238 | 5.13E-15 | -2.63127 | 1 | 1 Z95704.3       | K06632 |
| ENSG00000250242 | 5.13E-15 | -2.63127 | 1 | 1 RP11-438C19.1  | -      |
| ENSG00000250243 | 5.13E-15 | -2.63127 | 1 | 1 RP11-120A1.1   | -      |
| ENSG00000250244 | 5.13E-15 | -2.63127 | 1 | 1 CTB-49A3.4     | -      |
| ENSG00000250249 | 5.13E-15 | -2.63127 | 1 | 1 RP11-30P21.2   | -      |
| ENSG00000250250 | 5.13E-15 | -2.63127 | 1 | 1 CTD-2350J17.1  | -      |
| ENSG00000250252 | 5.13E-15 | -2.63127 | 1 | 1 RP11-342A1.1   | -      |
| ENSG00000250253 | 5.13E-15 | -2.63127 | 1 | 1 RP11-1072N2.2  | K02875 |
| ENSG00000250254 | 5.13E-15 | -2.63127 | 1 | 1 PTTG2          | K06635 |
| ENSG00000250256 | 5.13E-15 | -2.63127 | 1 | 1 RP11-267A15.3  | -      |
| ENSG00000250257 | 5.13E-15 | -2.63127 | 1 | 1 LDHAL6DP       | K00016 |
| ENSG00000250258 | 5.13E-15 | -2.63127 | 1 | 1 CTC-431G16.2   | -      |
| ENSG00000250259 | 5.13E-15 | -2.63127 | 1 | 1 RP11-460I19.2  | -      |
| ENSG00000250260 | 5.13E-15 | -2.63127 | 1 | 1 RP11-325L7.2   | -      |
| ENSG00000250263 | 5.13E-15 | -2.63127 | 1 | 1 RP11-765K14.1  | -      |
| ENSG00000250264 | 5.13E-15 | -2.63127 | 1 | 1 TAP2           | K05654 |

|                 |          |          |   |                  |        |
|-----------------|----------|----------|---|------------------|--------|
| ENSG00000250266 | 5.13E-15 | -2.63127 | 1 | 1 RP11-789C1.1   | -      |
| ENSG00000250267 | 5.13E-15 | -2.63127 | 1 | 1 RP11-122A21.2  | -      |
| ENSG00000250268 | 5.13E-15 | -2.63127 | 1 | 1 ALG1L14P       | K03842 |
| ENSG00000250269 | 5.13E-15 | -2.63127 | 1 | 1 RP11-395P13.5  | -      |
| ENSG00000250271 | 5.13E-15 | -2.63127 | 1 | 1 RP11-64D22.5   | -      |
| ENSG00000250272 | 5.13E-15 | -2.63127 | 1 | 1 TRMT112P1      | K15448 |
| ENSG00000250273 | 5.13E-15 | -2.63127 | 1 | 1 PSMC1P5        | K03062 |
| ENSG00000250274 | 5.13E-15 | -2.63127 | 1 | 1 CTB-114C7.4    | -      |
| ENSG00000250277 | 5.13E-15 | -2.63127 | 1 | 1 RP11-468N14.11 | K10523 |
| ENSG00000250286 | 5.13E-15 | -2.63127 | 1 | 1 RP11-94C24.8   | -      |
| ENSG00000250289 | 5.13E-15 | -2.63127 | 1 | 1 VWA8P1         | -      |
| ENSG00000250290 | 5.13E-15 | -2.63127 | 1 | 1 CTC-820M8.1    | K06678 |
| ENSG00000250293 | 5.13E-15 | -2.63127 | 1 | 1 CRYZP2         | -      |
| ENSG00000250296 | 5.13E-15 | -2.63127 | 1 | 1 RP11-321E2.9   | K03135 |
| ENSG00000250298 | 5.13E-15 | -2.63127 | 1 | 1 GIMD1          | -      |
| ENSG00000250300 | 5.13E-15 | -2.63127 | 1 | 1 RP11-696N14.3  | -      |
| ENSG00000250302 | 5.13E-15 | -2.63127 | 1 | 1 RP11-752D24.3  | -      |
| ENSG00000250304 | 5.13E-15 | -2.63127 | 1 | 1 ZBED1P1        | -      |
| ENSG00000250305 | 5.13E-15 | -2.63127 | 1 | 1 KIAA1456       | K12581 |
| ENSG00000250306 | 5.13E-15 | -2.63127 | 1 | 1 CTC-498M16.3   | K02866 |
| ENSG00000250307 | 5.13E-15 | -2.63127 | 1 | 1 TUBB8P3        | K07375 |
| ENSG00000250308 | 5.13E-15 | -2.63127 | 1 | 1 SALL4P1        | -      |
| ENSG00000250309 | 5.13E-15 | -2.63127 | 1 | 1 CTC-345K18.2   | -      |
| ENSG00000250310 | 5.13E-15 | -2.63127 | 1 | 1 RP5-1029K10.4  | -      |
| ENSG00000250312 | 5.13E-15 | -2.63127 | 1 | 1 ZNF718         | -      |
| ENSG00000250313 | 5.13E-15 | -2.63127 | 1 | 1 RP11-5P22.3    | -      |
| ENSG00000250315 | 5.13E-15 | -2.63127 | 1 | 1 RP11-44F21.4   | -      |
| ENSG00000250316 | 5.13E-15 | -2.63127 | 1 | 1 RP11-618M23.1  | -      |
| ENSG00000250319 | 5.13E-15 | -2.63127 | 1 | 1 CTD-2272G21.3  | -      |
| ENSG00000250321 | 5.13E-15 | -2.63127 | 1 | 1 RP11-478C6.4   | K02962 |
| ENSG00000250322 | 5.13E-15 | -2.63127 | 1 | 1 CTB-51E13.1    | K02953 |
| ENSG00000250324 | 5.13E-15 | -2.63127 | 1 | 1 MRPL22P1       | K02890 |
| ENSG00000250325 | 5.13E-15 | -2.63127 | 1 | 1 IGBP1P4        | K17606 |
| ENSG00000250327 | 5.13E-15 | -2.63127 | 1 | 1 RP11-173M11.2  | K02998 |
| ENSG00000250328 | 5.13E-15 | -2.63127 | 1 | 1 CTC-210G5.1    | -      |
| ENSG00000250329 | 5.13E-15 | -2.63127 | 1 | 1 KDELC1P1       | -      |
| ENSG00000250331 | 5.13E-15 | -2.63127 | 1 | 1 RP11-1E3.1     | -      |
| ENSG00000250333 | 5.13E-15 | -2.63127 | 1 | 1 RP11-4O3.1     | -      |
| ENSG00000250334 | 5.13E-15 | -2.63127 | 1 | 1 LINC00989      | -      |
| ENSG00000250338 | 5.13E-15 | -2.63127 | 1 | 1 RP11-395I6.2   | -      |
| ENSG00000250339 | 5.13E-15 | -2.63127 | 1 | 1 CXCL1P         | K05505 |
| ENSG00000250340 | 5.13E-15 | -2.63127 | 1 | 1 RP11-577G20.1  | -      |
| ENSG00000250341 | 5.13E-15 | -2.63127 | 1 | 1 RP11-785F11.1  | -      |
| ENSG00000250342 | 5.13E-15 | -2.63127 | 1 | 1 RP11-747H12.6  | K11095 |
| ENSG00000250343 | 5.13E-15 | -2.63127 | 1 | 1 CTC-255N20.1   | -      |
| ENSG00000250344 | 5.13E-15 | -2.63127 | 1 | 1 RP11-647P12.1  | -      |
| ENSG00000250345 | 5.13E-15 | -2.63127 | 1 | 1 RP11-780M14.1  | K00894 |
| ENSG00000250346 | 5.13E-15 | -2.63127 | 1 | 1 EEF1GP2        | K03233 |
| ENSG00000250347 | 5.13E-15 | -2.63127 | 1 | 1 AC005740.4     | K02867 |
| ENSG00000250348 | 5.13E-15 | -2.63127 | 1 | 1 RP11-466P24.6  | -      |
| ENSG00000250349 | 5.13E-15 | -2.63127 | 1 | 1 TM4SF2         | K06571 |
| ENSG00000250350 | 5.13E-15 | -2.63127 | 1 | 1 RP11-731D1.3   | -      |
| ENSG00000250351 | 5.13E-15 | -2.63127 | 1 | 1 RP11-432M8.10  | K11253 |
| ENSG00000250354 | 5.13E-15 | -2.63127 | 1 | 1 RP11-76G10.1   | -      |
| ENSG00000250355 | 5.13E-15 | -2.63127 | 1 | 1 RP11-79L21.1   | -      |
| ENSG00000250356 | 5.13E-15 | -2.63127 | 1 | 1 HSPE1P23       | K04078 |
| ENSG00000250357 | 5.13E-15 | -2.63127 | 1 | 1 RP11-503L19.1  | -      |
| ENSG00000250358 | 5.13E-15 | -2.63127 | 1 | 1 RP11-159K7.2   | -      |



|                 |          |          |   |                 |        |
|-----------------|----------|----------|---|-----------------|--------|
| ENSG00000250359 | 5.13E-15 | -2.63127 | 1 | 1 PTP4A1P4      | K18041 |
| ENSG00000250361 | 5.13E-15 | -2.63127 | 1 | 1 GYPB          | K06575 |
| ENSG00000250363 | 5.13E-15 | -2.63127 | 1 | 1 KRT18P21      | K07604 |
| ENSG00000250366 | 5.13E-15 | -2.63127 | 1 | 1 LINC00617     | -      |
| ENSG00000250371 | 5.13E-15 | -2.63127 | 1 | 1 RP11-22A3.2   | -      |
| ENSG00000250372 | 5.13E-15 | -2.63127 | 1 | 1 MARK2P4       | -      |
| ENSG00000250374 | 5.13E-15 | -2.63127 | 1 | 1 RP11-219C20.1 | K12037 |
| ENSG00000250375 | 5.13E-15 | -2.63127 | 1 | 1 RP11-340A13.3 | -      |
| ENSG00000250376 | 5.13E-15 | -2.63127 | 1 | 1 CTD-2005D20.1 | K00699 |
| ENSG00000250377 | 5.13E-15 | -2.63127 | 1 | 1 CTC-467M3.3   | -      |
| ENSG00000250378 | 5.13E-15 | -2.63127 | 1 | 1 RP11-119J18.1 | -      |
| ENSG00000250381 | 5.13E-15 | -2.63127 | 1 | 1 UNC93B4       | K04257 |
| ENSG00000250383 | 5.13E-15 | -2.63127 | 1 | 1 CTD-2197I11.1 | -      |
| ENSG00000250384 | 5.13E-15 | -2.63127 | 1 | 1 UBE2CP3       | K06688 |
| ENSG00000250385 | 5.13E-15 | -2.63127 | 1 | 1 RP11-310P5.2  | -      |
| ENSG00000250386 | 5.13E-15 | -2.63127 | 1 | 1 RP11-432M8.11 | K11253 |
| ENSG00000250387 | 5.13E-15 | -2.63127 | 1 | 1 RP11-136K7.2  | -      |
| ENSG00000250389 | 5.13E-15 | -2.63127 | 1 | 1 MTND6P2       | -      |
| ENSG00000250390 | 5.13E-15 | -2.63127 | 1 | 1 RP11-338H14.1 | -      |
| ENSG00000250391 | 5.13E-15 | -2.63127 | 1 | 1 CTD-2160D9.1  | -      |
| ENSG00000250392 | 5.13E-15 | -2.63127 | 1 | 1 RP11-700N1.1  | -      |
| ENSG00000250393 | 5.13E-15 | -2.63127 | 1 | 1 RP11-480G3.1  | -      |
| ENSG00000250398 | 5.13E-15 | -2.63127 | 1 | 1 RP11-27G13.4  | -      |
| ENSG00000250400 | 5.13E-15 | -2.63127 | 1 | 1 LINC00977     | -      |
| ENSG00000250402 | 5.13E-15 | -2.63127 | 1 | 1 RP11-395P13.4 | -      |
| ENSG00000250403 | 5.13E-15 | -2.63127 | 1 | 1 RP11-15B17.2  | -      |
| ENSG00000250405 | 5.13E-15 | -2.63127 | 1 | 1 RP11-114H7.2  | K13096 |
| ENSG00000250406 | 5.13E-15 | -2.63127 | 1 | 1 RP13-539F13.3 | -      |
| ENSG00000250407 | 5.13E-15 | -2.63127 | 1 | 1 CTB-99A3.1    | -      |
| ENSG00000250409 | 5.13E-15 | -2.63127 | 1 | 1 CTB-3M24.3    | -      |
| ENSG00000250411 | 5.13E-15 | -2.63127 | 1 | 1 RP11-257I8.2  | -      |
| ENSG00000250412 | 5.13E-15 | -2.63127 | 1 | 1 KLHL2P1       | K10443 |
| ENSG00000250413 | 5.13E-15 | -2.63127 | 1 | 1 RP11-448G15.1 | -      |
| ENSG00000250415 | 5.13E-15 | -2.63127 | 1 | 1 CTC-461F20.1  | -      |
| ENSG00000250416 | 5.13E-15 | -2.63127 | 1 | 1 SEC63P2       | -      |
| ENSG00000250417 | 5.13E-15 | -2.63127 | 1 | 1 CTD-2194D22.2 | -      |
| ENSG00000250418 | 5.13E-15 | -2.63127 | 1 | 1 RP11-503D12.1 | -      |
| ENSG00000250420 | 5.13E-15 | -2.63127 | 1 | 1 AACSP1        | K01907 |
| ENSG00000250421 | 5.13E-15 | -2.63127 | 1 | 1 RP11-83M16.6  | -      |
| ENSG00000250422 | 5.13E-15 | -2.63127 | 1 | 1 RP11-484L7.1  | K12399 |
| ENSG00000250423 | 5.13E-15 | -2.63127 | 1 | 1 KIAA1210      | K17985 |
| ENSG00000250424 | 5.13E-15 | -2.63127 | 1 | 1 AQP1          | K09864 |
| ENSG00000250425 | 5.13E-15 | -2.63127 | 1 | 1 OR7E35P       | K04257 |
| ENSG00000250426 | 5.13E-15 | -2.63127 | 1 | 1 FTLP10        | K17985 |
| ENSG00000250427 | 5.13E-15 | -2.63127 | 1 | 1 CTD-3179P9.2  | -      |
| ENSG00000250428 | 5.13E-15 | -2.63127 | 1 | 1 RP11-1082L8.1 | K16075 |
| ENSG00000250430 | 5.13E-15 | -2.63127 | 1 | 1 RP11-366M4.15 | K09537 |
| ENSG00000250431 | 5.13E-15 | -2.63127 | 1 | 1 RP13-577H12.2 | -      |
| ENSG00000250433 | 5.13E-15 | -2.63127 | 1 | 1 CLSTN2-AS1    | -      |
| ENSG00000250436 | 5.13E-15 | -2.63127 | 1 | 1 RP11-622A1.2  | -      |
| ENSG00000250437 | 5.13E-15 | -2.63127 | 1 | 1 RP11-116A1.1  | -      |
| ENSG00000250438 | 5.13E-15 | -2.63127 | 1 | 1 CTD-2308B18.2 | -      |
| ENSG00000250439 | 5.13E-15 | -2.63127 | 1 | 1 FGD5P1        | K05724 |
| ENSG00000250441 | 5.13E-15 | -2.63127 | 1 | 1 RP11-47F1.1   | K12621 |
| ENSG00000250442 | 5.13E-15 | -2.63127 | 1 | 1 EIF3KP3       | K15028 |
| ENSG00000250443 | 5.13E-15 | -2.63127 | 1 | 1 AC128709.1    | K12581 |
| ENSG00000250446 | 5.13E-15 | -2.63127 | 1 | 1 CTD-2275D24.3 | -      |
| ENSG00000250447 | 5.13E-15 | -2.63127 | 1 | 1 CTD-2081C10.1 | -      |

|                 |          |          |   |                  |        |
|-----------------|----------|----------|---|------------------|--------|
| ENSG00000250448 | 5.13E-15 | -2.63127 | 1 | 1 RP11-19O2.2    | --     |
| ENSG00000250453 | 5.13E-15 | -2.63127 | 1 | 1 CTD-2134P3.1   | --     |
| ENSG00000250455 | 5.13E-15 | -2.63127 | 1 | 1 RP11-648M2.1   | --     |
| ENSG00000250456 | 5.13E-15 | -2.63127 | 1 | 1 AC006552.1     | --     |
| ENSG00000250458 | 5.13E-15 | -2.63127 | 1 | 1 RP11-107E21.1  | --     |
| ENSG00000250464 | 5.13E-15 | -2.63127 | 1 | 1 RP11-148K14.1  | --     |
| ENSG00000250467 | 5.13E-15 | -2.63127 | 1 | 1 RP11-227F19.1  | --     |
| ENSG00000250470 | 5.13E-15 | -2.63127 | 1 | 1 AP000351.3     | K00799 |
| ENSG00000250472 | 5.13E-15 | -2.63127 | 1 | 1 TRIM36-IT1     | --     |
| ENSG00000250473 | 5.13E-15 | -2.63127 | 1 | 1 DUTP7          | K01520 |
| ENSG00000250475 | 5.13E-15 | -2.63127 | 1 | 1 RP11-312A15.3  | K02934 |
| ENSG00000250476 | 5.13E-15 | -2.63127 | 1 | 1 ENPP7P9        | K12354 |
| ENSG00000250480 | 5.13E-15 | -2.63127 | 1 | 1 RP11-101B14.1  | --     |
| ENSG00000250481 | 5.13E-15 | -2.63127 | 1 | 1 CTD-2247C11.1  | --     |
| ENSG00000250482 | 5.13E-15 | -2.63127 | 1 | 1 RP11-152K4.1   | --     |
| ENSG00000250483 | 5.13E-15 | -2.63127 | 1 | 1 PPM1AP1        | K04457 |
| ENSG00000250484 | 5.13E-15 | -2.63127 | 1 | 1 RP11-728C8.1   | K03767 |
| ENSG00000250485 | 5.13E-15 | -2.63127 | 1 | 1 EXOC7P1        | K07195 |
| ENSG00000250486 | 5.13E-15 | -2.63127 | 1 | 1 FAM218A        | --     |
| ENSG00000250488 | 5.13E-15 | -2.63127 | 1 | 1 RP11-6C14.1    | --     |
| ENSG00000250490 | 5.13E-15 | -2.63127 | 1 | 1 CTD-2324F15.2  | --     |
| ENSG00000250493 | 5.13E-15 | -2.63127 | 1 | 1 RP11-640N11.2  | --     |
| ENSG00000250494 | 5.13E-15 | -2.63127 | 1 | 1 RP11-162D9.1   | --     |
| ENSG00000250497 | 5.13E-15 | -2.63127 | 1 | 1 AC007126.1     | --     |
| ENSG00000250500 | 5.13E-15 | -2.63127 | 1 | 1 RP11-119H12.3  | K03242 |
| ENSG00000250501 | 5.13E-15 | -2.63127 | 1 | 1 RP11-98O2.1    | --     |
| ENSG00000250503 | 5.13E-15 | -2.63127 | 1 | 1 RP11-401I19.1  | --     |
| ENSG00000250504 | 5.13E-15 | -2.63127 | 1 | 1 KRT18P51       | K07604 |
| ENSG00000250505 | 5.13E-15 | -2.63127 | 1 | 1 AC006499.3     | --     |
| ENSG00000250507 | 5.13E-15 | -2.63127 | 1 | 1 AC008984.6     | K06512 |
| ENSG00000250510 | 5.13E-15 | -2.63127 | 1 | 1 GPR162         | K08440 |
| ENSG00000250511 | 5.13E-15 | -2.63127 | 1 | 1 RP11-380D23.1  | --     |
| ENSG00000250514 | 5.13E-15 | -2.63127 | 1 | 1 RP11-96P7.1    | --     |
| ENSG00000250515 | 5.13E-15 | -2.63127 | 1 | 1 RP11-515C16.7  | --     |
| ENSG00000250516 | 5.13E-15 | -2.63127 | 1 | 1 RP11-380I10.2  | K04712 |
| ENSG00000250517 | 5.13E-15 | -2.63127 | 1 | 1 LDHAL6CP       | K00016 |
| ENSG00000250519 | 5.13E-15 | -2.63127 | 1 | 1 RP11-680H20.2  | --     |
| ENSG00000250522 | 5.13E-15 | -2.63127 | 1 | 1 AC004066.3     | --     |
| ENSG00000250523 | 5.13E-15 | -2.63127 | 1 | 1 RP11-756P10.1  | --     |
| ENSG00000250524 | 5.13E-15 | -2.63127 | 1 | 1 RP11-730N24.2  | --     |
| ENSG00000250526 | 5.13E-15 | -2.63127 | 1 | 1 CCT6P2         | K09498 |
| ENSG00000250529 | 5.13E-15 | -2.63127 | 1 | 1 CTD-2247C11.5  | --     |
| ENSG00000250530 | 5.13E-15 | -2.63127 | 1 | 1 RP11-436H11.3  | --     |
| ENSG00000250532 | 5.13E-15 | -2.63127 | 1 | 1 RP11-727M10.1  | --     |
| ENSG00000250535 | 5.13E-15 | -2.63127 | 1 | 1 STK19P         | K08880 |
| ENSG00000250537 | 5.13E-15 | -2.63127 | 1 | 1 DUX4L8         | --     |
| ENSG00000250538 | 5.13E-15 | -2.63127 | 1 | 1 RP11-92A5.2    | --     |
| ENSG00000250540 | 5.13E-15 | -2.63127 | 1 | 1 RP11-58H15.3   | --     |
| ENSG00000250541 | 5.13E-15 | -2.63127 | 1 | 1 RP11-302F12.10 | --     |
| ENSG00000250543 | 5.13E-15 | -2.63127 | 1 | 1 RP11-442N1.1   | --     |
| ENSG00000250544 | 5.13E-15 | -2.63127 | 1 | 1 CTC-493L21.1   | --     |
| ENSG00000250546 | 5.13E-15 | -2.63127 | 1 | 1 RP11-8L2.1     | --     |
| ENSG00000250547 | 5.13E-15 | -2.63127 | 1 | 1 RP11-719L21.1  | K02988 |
| ENSG00000250550 | 5.13E-15 | -2.63127 | 1 | 1 PPBPP1         | K10029 |
| ENSG00000250555 | 5.13E-15 | -2.63127 | 1 | 1 CTC-467M3.2    | --     |
| ENSG00000250558 | 5.13E-15 | -2.63127 | 1 | 1 RP11-432M8.3   | K03135 |
| ENSG00000250560 | 5.13E-15 | -2.63127 | 1 | 1 RP11-598G2.1   | K09228 |
| ENSG00000250561 | 5.13E-15 | -2.63127 | 1 | 1 OR7E59P        | K04257 |

|                 |          |          |   |                 |        |
|-----------------|----------|----------|---|-----------------|--------|
| ENSG00000250562 | 5.13E-15 | -2.63127 | 1 | 1 RPL38P4       | K02923 |
| ENSG00000250563 | 5.13E-15 | -2.63127 | 1 | 1 KNOP1P5       | -      |
| ENSG00000250564 | 5.13E-15 | -2.63127 | 1 | 1 RP11-215P8.4  | -      |
| ENSG00000250566 | 5.13E-15 | -2.63127 | 1 | 1 UGT2B29P      | K00699 |
| ENSG00000250567 | 5.13E-15 | -2.63127 | 1 | 1 CTD-2154H6.1  | -      |
| ENSG00000250572 | 5.13E-15 | -2.63127 | 1 | 1 RP11-529H2.1  | -      |
| ENSG00000250573 | 5.13E-15 | -2.63127 | 1 | 1 AC006499.5    | -      |
| ENSG00000250574 | 5.13E-15 | -2.63127 | 1 | 1 CTD-2275D10.2 | K12260 |
| ENSG00000250575 | 5.13E-15 | -2.63127 | 1 | 1 RP4-669L17.8  | -      |
| ENSG00000250576 | 5.13E-15 | -2.63127 | 1 | 1 CTD-2154B17.1 | -      |
| ENSG00000250577 | 5.13E-15 | -2.63127 | 1 | 1 RP11-577B7.1  | -      |
| ENSG00000250579 | 5.13E-15 | -2.63127 | 1 | 1 CTD-2297D10.2 | -      |
| ENSG00000250580 | 5.13E-15 | -2.63127 | 1 | 1 RP11-93K22.14 | K11095 |
| ENSG00000250582 | 5.13E-15 | -2.63127 | 1 | 1 SMAD1-AS2     | -      |
| ENSG00000250583 | 5.13E-15 | -2.63127 | 1 | 1 CTD-2233C11.2 | -      |
| ENSG00000250584 | 5.13E-15 | -2.63127 | 1 | 1 RP11-325I22.2 | -      |
| ENSG00000250585 | 5.13E-15 | -2.63127 | 1 | 1 LINC00604     | -      |
| ENSG00000250587 | 5.13E-15 | -2.63127 | 1 | 1 RP11-136H13.1 | K00760 |
| ENSG00000250590 | 5.13E-15 | -2.63127 | 1 | 1 RP11-565A3.2  | -      |
| ENSG00000250591 | 5.13E-15 | -2.63127 | 1 | 1 PRSS3P1       | K01312 |
| ENSG00000250592 | 5.13E-15 | -2.63127 | 1 | 1 RP11-39E3.3   | -      |
| ENSG00000250594 | 5.13E-15 | -2.63127 | 1 | 1 RP11-433B3.1  | K11971 |
| ENSG00000250596 | 5.13E-15 | -2.63127 | 1 | 1 RP11-440I14.2 | -      |
| ENSG00000250597 | 5.13E-15 | -2.63127 | 1 | 1 RP11-725M22.1 | -      |
| ENSG00000250603 | 5.13E-15 | -2.63127 | 1 | 1 CTC-228N24.2  | -      |
| ENSG00000250604 | 5.13E-15 | -2.63127 | 1 | 1 RP11-597D13.8 | -      |
| ENSG00000250606 | 5.13E-15 | -2.63127 | 1 | 1 PRSS3P2       | K01312 |
| ENSG00000250608 | 5.13E-15 | -2.63127 | 1 | 1 RP11-933H2.4  | -      |
| ENSG00000250609 | 5.13E-15 | -2.63127 | 1 | 1 RP11-158C21.2 | K13221 |
| ENSG00000250611 | 5.13E-15 | -2.63127 | 1 | 1 RP11-339D20.1 | -      |
| ENSG00000250612 | 5.13E-15 | -2.63127 | 1 | 1 RP11-618I10.2 | K00699 |
| ENSG00000250613 | 5.13E-15 | -2.63127 | 1 | 1 RP11-136I13.1 | K10420 |
| ENSG00000250614 | 5.13E-15 | -2.63127 | 1 | 1 AC007078.4    | -      |
| ENSG00000250615 | 5.13E-15 | -2.63127 | 1 | 1 CTC-564N23.2  | -      |
| ENSG00000250618 | 5.13E-15 | -2.63127 | 1 | 1 RP11-548K12.9 | -      |
| ENSG00000250619 | 5.13E-15 | -2.63127 | 1 | 1 CTD-2215L10.1 | -      |
| ENSG00000250620 | 5.13E-15 | -2.63127 | 1 | 1 RP11-91J3.3   | -      |
| ENSG00000250622 | 5.13E-15 | -2.63127 | 1 | 1 RP11-612J15.3 | K02915 |
| ENSG00000250623 | 5.13E-15 | -2.63127 | 1 | 1 RP11-317B7.3  | -      |
| ENSG00000250625 | 5.13E-15 | -2.63127 | 1 | 1 RP1-142F18.2  | -      |
| ENSG00000250626 | 5.13E-15 | -2.63127 | 1 | 1 RP11-756P10.2 | -      |
| ENSG00000250627 | 5.13E-15 | -2.63127 | 1 | 1 TTC39CP1      | -      |
| ENSG00000250630 | 5.13E-15 | -2.63127 | 1 | 1 RP11-52L11.4  | -      |
| ENSG00000250632 | 5.13E-15 | -2.63127 | 1 | 1 RP3-513G18.2  | -      |
| ENSG00000250634 | 5.13E-15 | -2.63127 | 1 | 1 RP11-341G5.1  | -      |
| ENSG00000250636 | 5.13E-15 | -2.63127 | 1 | 1 RP11-335L23.2 | K13129 |
| ENSG00000250637 | 5.13E-15 | -2.63127 | 1 | 1 RP11-359P18.1 | -      |
| ENSG00000250640 | 5.13E-15 | -2.63127 | 1 | 1 RP11-7O20.4   | K04257 |
| ENSG00000250641 | 5.13E-15 | -2.63127 | 1 | 1 MEGT1         | K06846 |
| ENSG00000250642 | 5.13E-15 | -2.63127 | 1 | 1 RP11-642E20.5 | K00699 |
| ENSG00000250643 | 5.13E-15 | -2.63127 | 1 | 1 RP11-93K22.6  | -      |
| ENSG00000250646 | 5.13E-15 | -2.63127 | 1 | 1 RP11-530I17.1 | -      |
| ENSG00000250650 | 5.13E-15 | -2.63127 | 1 | 1 RP11-492L8.1  | -      |
| ENSG00000250651 | 5.13E-15 | -2.63127 | 1 | 1 PABPC1P7      | K13126 |
| ENSG00000250655 | 5.13E-15 | -2.63127 | 1 | 1 RP11-61G24.1  | K06271 |
| ENSG00000250657 | 5.13E-15 | -2.63127 | 1 | 1 RP11-1E6.1    | -      |
| ENSG00000250658 | 5.13E-15 | -2.63127 | 1 | 1 RP11-138B4.1  | -      |
| ENSG00000250662 | 5.13E-15 | -2.63127 | 1 | 1 HNRNPKP5      | K12886 |

|                 |          |          |   |                  |        |
|-----------------|----------|----------|---|------------------|--------|
| ENSG00000250665 | 5.13E-15 | -2.63127 | 1 | 1 RP11-775H9.1   | -      |
| ENSG00000250666 | 5.13E-15 | -2.63127 | 1 | 1 RP11-463J17.1  | -      |
| ENSG00000250667 | 5.13E-15 | -2.63127 | 1 | 1 RP11-321E2.12  | -      |
| ENSG00000250668 | 5.13E-15 | -2.63127 | 1 | 1 CTD-2296D1.2   | -      |
| ENSG00000250669 | 5.13E-15 | -2.63127 | 1 | 1 RP11-83M16.3   | K17420 |
| ENSG00000250670 | 5.13E-15 | -2.63127 | 1 | 1 AC004063.1     | -      |
| ENSG00000250672 | 5.13E-15 | -2.63127 | 1 | 1 CTD-2017D15.1  | -      |
| ENSG00000250673 | 5.13E-15 | -2.63127 | 1 | 1 RP11-6L6.2     | -      |
| ENSG00000250674 | 5.13E-15 | -2.63127 | 1 | 1 RP11-798K23.1  | -      |
| ENSG00000250678 | 5.13E-15 | -2.63127 | 1 | 1 CTB-161M19.1   | K01097 |
| ENSG00000250681 | 5.13E-15 | -2.63127 | 1 | 1 RP3-368B9.2    | -      |
| ENSG00000250682 | 5.13E-15 | -2.63127 | 1 | 1 LINC00491      | -      |
| ENSG00000250684 | 5.13E-15 | -2.63127 | 1 | 1 KB-1042C11.1   | K08967 |
| ENSG00000250685 | 5.13E-15 | -2.63127 | 1 | 1 RP11-486L19.2  | -      |
| ENSG00000250686 | 5.13E-15 | -2.63127 | 1 | 1 RP1-240B8.3    | -      |
| ENSG00000250687 | 5.13E-15 | -2.63127 | 1 | 1 RP11-497H16.7  | K12807 |
| ENSG00000250688 | 5.13E-15 | -2.63127 | 1 | 1 TRAJ55         | -      |
| ENSG00000250692 | 5.13E-15 | -2.63127 | 1 | 1 CTB-35F21.4    | -      |
| ENSG00000250693 | 5.13E-15 | -2.63127 | 1 | 1 RPF2P2         | K14847 |
| ENSG00000250694 | 5.13E-15 | -2.63127 | 1 | 1 CTD-2074D8.1   | -      |
| ENSG00000250696 | 5.13E-15 | -2.63127 | 1 | 1 RP11-704M14.1  | -      |
| ENSG00000250698 | 5.13E-15 | -2.63127 | 1 | 1 RP11-392B6.1   | -      |
| ENSG00000250699 | 5.13E-15 | -2.63127 | 1 | 1 AP000892.4     | -      |
| ENSG00000250703 | 5.13E-15 | -2.63127 | 1 | 1 CTD-2533K21.1  | K02437 |
| ENSG00000250704 | 5.13E-15 | -2.63127 | 1 | 1 RP11-423J7.1   | -      |
| ENSG00000250705 | 5.13E-15 | -2.63127 | 1 | 1 CTC-470C15.1   | K11253 |
| ENSG00000250706 | 5.13E-15 | -2.63127 | 1 | 1 RP11-18H21.2   | -      |
| ENSG00000250708 | 5.13E-15 | -2.63127 | 1 | 1 RP11-161D15.1  | -      |
| ENSG00000250709 | 5.13E-15 | -2.63127 | 1 | 1 CCDC169-SOHLH2 | -      |
| ENSG00000250710 | 5.13E-15 | -2.63127 | 1 | 1 OR7E99P        | K04257 |
| ENSG00000250711 | 5.13E-15 | -2.63127 | 1 | 1 CTD-2201E18.1  | -      |
| ENSG00000250712 | 5.13E-15 | -2.63127 | 1 | 1 RP11-366M4.14  | K12037 |
| ENSG00000250714 | 5.13E-15 | -2.63127 | 1 | 1 RP11-1149O23.4 | -      |
| ENSG00000250715 | 5.13E-15 | -2.63127 | 1 | 1 RP11-432M8.19  | K11253 |
| ENSG00000250716 | 5.13E-15 | -2.63127 | 1 | 1 RP11-121L11.2  | -      |
| ENSG00000250719 | 5.13E-15 | -2.63127 | 1 | 1 RP11-322N21.2  | -      |
| ENSG00000250721 | 5.13E-15 | -2.63127 | 1 | 1 HMGB1P22       | K10802 |
| ENSG00000250723 | 5.13E-15 | -2.63127 | 1 | 1 RP11-79E3.2    | -      |
| ENSG00000250725 | 5.13E-15 | -2.63127 | 1 | 1 RP11-511B7.1   | K12014 |
| ENSG00000250726 | 5.13E-15 | -2.63127 | 1 | 1 RP11-616K6.1   | -      |
| ENSG00000250727 | 5.13E-15 | -2.63127 | 1 | 1 RP11-959I15.1  | -      |
| ENSG00000250728 | 5.13E-15 | -2.63127 | 1 | 1 AC010468.3     | K18751 |
| ENSG00000250730 | 5.13E-15 | -2.63127 | 1 | 1 HMGB3P3        | K11296 |
| ENSG00000250732 | 5.13E-15 | -2.63127 | 1 | 1 RPEP1          | -      |
| ENSG00000250733 | 5.13E-15 | -2.63127 | 1 | 1 C8orf17        | K17985 |
| ENSG00000250735 | 5.13E-15 | -2.63127 | 1 | 1 RP11-567N4.3   | -      |
| ENSG00000250739 | 5.13E-15 | -2.63127 | 1 | 1 RP11-462G22.1  | -      |
| ENSG00000250740 | 5.13E-15 | -2.63127 | 1 | 1 RP11-710F7.2   | -      |
| ENSG00000250741 | 5.13E-15 | -2.63127 | 1 | 1 NT5C1B-RDH14   | K01081 |
| ENSG00000250745 | 5.13E-15 | -2.63127 | 1 | 1 USP17L20       | K11845 |
| ENSG00000250746 | 5.13E-15 | -2.63127 | 1 | 1 RP11-39C10.1   | K09490 |
| ENSG00000250747 | 5.13E-15 | -2.63127 | 1 | 1 RP11-232L2.1   | K02985 |
| ENSG00000250750 | 5.13E-15 | -2.63127 | 1 | 1 OR5BM1P        | K04257 |
| ENSG00000250751 | 5.13E-15 | -2.63127 | 1 | 1 RP11-613C6.2   | -      |
| ENSG00000250752 | 5.13E-15 | -2.63127 | 1 | 1 GS1-24F4.1     | K02893 |
| ENSG00000250753 | 5.13E-15 | -2.63127 | 1 | 1 RP11-241F15.10 | K17299 |
| ENSG00000250754 | 5.13E-15 | -2.63127 | 1 | 1 RP11-386B13.3  | -      |
| ENSG00000250760 | 5.13E-15 | -2.63127 | 1 | 1 RP11-440I14.4  | K09228 |

|                 |          |          |   |                  |        |
|-----------------|----------|----------|---|------------------|--------|
| ENSG00000250761 | 5.13E-15 | -2.63127 | 1 | 1 RP11-711G10.1  | -      |
| ENSG00000250765 | 5.13E-15 | -2.63127 | 1 | 1 AC138035.1     | -      |
| ENSG00000250767 | 5.13E-15 | -2.63127 | 1 | 1 RP11-1084J3.3  | K01679 |
| ENSG00000250768 | 5.13E-15 | -2.63127 | 1 | 1 RP11-204H9.2   | K01277 |
| ENSG00000250770 | 5.13E-15 | -2.63127 | 1 | 1 RP5-1063M23.1  | -      |
| ENSG00000250771 | 5.13E-15 | -2.63127 | 1 | 1 RP11-153M7.3   | K10159 |
| ENSG00000250772 | 5.13E-15 | -2.63127 | 1 | 1 RP11-236P13.1  | -      |
| ENSG00000250775 | 5.13E-15 | -2.63127 | 1 | 1 RP11-12K22.1   | -      |
| ENSG00000250777 | 5.13E-15 | -2.63127 | 1 | 1 RP13-884E18.4  | -      |
| ENSG00000250778 | 5.13E-15 | -2.63127 | 1 | 1 AC004980.8     | K10858 |
| ENSG00000250781 | 5.13E-15 | -2.63127 | 1 | 1 RP11-63A11.1   | -      |
| ENSG00000250782 | 5.13E-15 | -2.63127 | 1 | 1 RP11-432M8.13  | K03135 |
| ENSG00000250786 | 5.13E-15 | -2.63127 | 1 | 1 SNHG18         | -      |
| ENSG00000250787 | 5.13E-15 | -2.63127 | 1 | 1 HMGN1P17       | K11299 |
| ENSG00000250788 | 5.13E-15 | -2.63127 | 1 | 1 TUBB8P4        | K07375 |
| ENSG00000250790 | 5.13E-15 | -2.63127 | 1 | 1 RP11-46H11.3   | -      |
| ENSG00000250791 | 5.13E-15 | -2.63127 | 1 | 1 RP11-55L3.1    | -      |
| ENSG00000250796 | 5.13E-15 | -2.63127 | 1 | 1 RP11-723O4.3   | -      |
| ENSG00000250799 | 5.13E-15 | -2.63127 | 1 | 1 PRODH2         | K11394 |
| ENSG00000250801 | 5.13E-15 | -2.63127 | 1 | 1 RP11-91H12.3   | -      |
| ENSG00000250803 | 5.13E-15 | -2.63127 | 1 | 1 CTC-441N14.4   | -      |
| ENSG00000250804 | 5.13E-15 | -2.63127 | 1 | 1 RP11-747H12.3  | K04257 |
| ENSG00000250806 | 5.13E-15 | -2.63127 | 1 | 1 CTC-293G12.1   | -      |
| ENSG00000250807 | 5.13E-15 | -2.63127 | 1 | 1 RP11-432M8.2   | K03135 |
| ENSG00000250808 | 5.13E-15 | -2.63127 | 1 | 1 RP11-531A21.4  | -      |
| ENSG00000250812 | 5.13E-15 | -2.63127 | 1 | 1 RP11-530I17.2  | -      |
| ENSG00000250813 | 5.13E-15 | -2.63127 | 1 | 1 SERF1AP1       | -      |
| ENSG00000250814 | 5.13E-15 | -2.63127 | 1 | 1 RP11-447B18.1  | -      |
| ENSG00000250815 | 5.13E-15 | -2.63127 | 1 | 1 RP11-89B16.2   | -      |
| ENSG00000250819 | 5.13E-15 | -2.63127 | 1 | 1 RP11-576E20.1  | -      |
| ENSG00000250820 | 5.13E-15 | -2.63127 | 1 | 1 RP11-91H12.4   | -      |
| ENSG00000250821 | 5.13E-15 | -2.63127 | 1 | 1 RP11-345F18.1  | -      |
| ENSG00000250825 | 5.13E-15 | -2.63127 | 1 | 1 PGAM1P12       | K01834 |
| ENSG00000250826 | 5.13E-15 | -2.63127 | 1 | 1 HNRNPA3P13     | K12741 |
| ENSG00000250827 | 5.13E-15 | -2.63127 | 1 | 1 CTD-2141G3.1   | K08175 |
| ENSG00000250828 | 5.13E-15 | -2.63127 | 1 | 1 RP11-790I12.3  | K00699 |
| ENSG00000250829 | 5.13E-15 | -2.63127 | 1 | 1 RP11-11N5.1    | -      |
| ENSG00000250830 | 5.13E-15 | -2.63127 | 1 | 1 MRPS35P2       | K17413 |
| ENSG00000250831 | 5.13E-15 | -2.63127 | 1 | 1 CTD-2232E5.2   | -      |
| ENSG00000250833 | 5.13E-15 | -2.63127 | 1 | 1 DNMI1P17       | K01528 |
| ENSG00000250834 | 5.13E-15 | -2.63127 | 1 | 1 KRT18P54       | K07604 |
| ENSG00000250835 | 5.13E-15 | -2.63127 | 1 | 1 LSM3P4         | K12622 |
| ENSG00000250839 | 5.13E-15 | -2.63127 | 1 | 1 RP11-296L20.1  | -      |
| ENSG00000250842 | 5.13E-15 | -2.63127 | 1 | 1 CTC-806A22.1   | -      |
| ENSG00000250844 | 5.13E-15 | -2.63127 | 1 | 1 USP17L18       | K11845 |
| ENSG00000250847 | 5.13E-15 | -2.63127 | 1 | 1 CTD-2020P22.1  | K13709 |
| ENSG00000250850 | 5.13E-15 | -2.63127 | 1 | 1 RP11-297B17.3  | -      |
| ENSG00000250852 | 5.13E-15 | -2.63127 | 1 | 1 AC131180.1     | K17299 |
| ENSG00000250857 | 5.13E-15 | -2.63127 | 1 | 1 TRIM60P15      | K12029 |
| ENSG00000250858 | 5.13E-15 | -2.63127 | 1 | 1 IGBP1P5        | K17606 |
| ENSG00000250859 | 5.13E-15 | -2.63127 | 1 | 1 HNRNPKP1       | K12886 |
| ENSG00000250860 | 5.13E-15 | -2.63127 | 1 | 1 CTD-2265D6.2   | K09228 |
| ENSG00000250862 | 5.13E-15 | -2.63127 | 1 | 1 HMGB1P29       | K10802 |
| ENSG00000250863 | 5.13E-15 | -2.63127 | 1 | 1 RP11-663P9.1   | -      |
| ENSG00000250865 | 5.13E-15 | -2.63127 | 1 | 1 RP11-780O17.1  | -      |
| ENSG00000250866 | 5.13E-15 | -2.63127 | 1 | 1 CTD-2297D10.1  | -      |
| ENSG00000250867 | 5.13E-15 | -2.63127 | 1 | 1 RP11-1415C14.2 | -      |
| ENSG00000250868 | 5.13E-15 | -2.63127 | 1 | 1 AC007742.7     | -      |

|                 |          |          |   |                  |        |
|-----------------|----------|----------|---|------------------|--------|
| ENSG00000250874 | 5.13E-15 | -2.63127 | 1 | 1 CTC-480C2.1    | -      |
| ENSG00000250877 | 5.13E-15 | -2.63127 | 1 | 1 RP11-373J21.1  | -      |
| ENSG00000250884 | 5.13E-15 | -2.63127 | 1 | 1 OR7E85P        | K04257 |
| ENSG00000250885 | 5.13E-15 | -2.63127 | 1 | 1 CTD-2004A9.1   | -      |
| ENSG00000250886 | 5.13E-15 | -2.63127 | 1 | 1 CTD-2046J7.1   | K00134 |
| ENSG00000250887 | 5.13E-15 | -2.63127 | 1 | 1 RP11-366M4.13  | -      |
| ENSG00000250888 | 5.13E-15 | -2.63127 | 1 | 1 RP11-168A11.1  | -      |
| ENSG00000250889 | 5.13E-15 | -2.63127 | 1 | 1 RP11-229C3.2   | -      |
| ENSG00000250890 | 5.13E-15 | -2.63127 | 1 | 1 RP5-837O21.8   | -      |
| ENSG00000250891 | 5.13E-15 | -2.63127 | 1 | 1 CTD-2281M20.1  | -      |
| ENSG00000250892 | 5.13E-15 | -2.63127 | 1 | 1 RP11-1365D11.1 | K06632 |
| ENSG00000250893 | 5.13E-15 | -2.63127 | 1 | 1 RP11-588L15.2  | -      |
| ENSG00000250894 | 5.13E-15 | -2.63127 | 1 | 1 RP11-450I1.4   | -      |
| ENSG00000250895 | 5.13E-15 | -2.63127 | 1 | 1 CTD-2158P22.4  | K07374 |
| ENSG00000250897 | 5.13E-15 | -2.63127 | 1 | 1 HMGB3P15       | K11296 |
| ENSG00000250902 | 5.13E-15 | -2.63127 | 1 | 1 SMAD1-AS1      | -      |
| ENSG00000250905 | 5.13E-15 | -2.63127 | 1 | 1 RP11-707F2.1   | -      |
| ENSG00000250906 | 5.13E-15 | -2.63127 | 1 | 1 RP11-632F7.3   | -      |
| ENSG00000250908 | 5.13E-15 | -2.63127 | 1 | 1 RP11-703C10.1  | -      |
| ENSG00000250910 | 5.13E-15 | -2.63127 | 1 | 1 AC097467.2     | -      |
| ENSG00000250913 | 5.13E-15 | -2.63127 | 1 | 1 USP17L23       | K11845 |
| ENSG00000250914 | 5.13E-15 | -2.63127 | 1 | 1 RP11-1084J3.1  | K03064 |
| ENSG00000250915 | 5.13E-15 | -2.63127 | 1 | 1 RP11-1338A24.1 | -      |
| ENSG00000250918 | 5.13E-15 | -2.63127 | 1 | 1 RP11-497H16.4  | -      |
| ENSG00000250919 | 5.13E-15 | -2.63127 | 1 | 1 RP11-813N20.3  | K00699 |
| ENSG00000250921 | 5.13E-15 | -2.63127 | 1 | 1 CTD-2008N3.1   | -      |
| ENSG00000250922 | 5.13E-15 | -2.63127 | 1 | 1 ATP5EP1        | -      |
| ENSG00000250923 | 5.13E-15 | -2.63127 | 1 | 1 RP11-548K12.8  | -      |
| ENSG00000250927 | 5.13E-15 | -2.63127 | 1 | 1 MESTP3         | -      |
| ENSG00000250928 | 5.13E-15 | -2.63127 | 1 | 1 CTB-161M19.2   | K16890 |
| ENSG00000250929 | 5.13E-15 | -2.63127 | 1 | 1 KB-1639H6.4    | -      |
| ENSG00000250930 | 5.13E-15 | -2.63127 | 1 | 1 LNX1-AS1       | -      |
| ENSG00000250933 | 5.13E-15 | -2.63127 | 1 | 1 GAPDHP66       | K00134 |
| ENSG00000250939 | 5.13E-15 | -2.63127 | 1 | 1 AC034198.7     | K19656 |
| ENSG00000250940 | 5.13E-15 | -2.63127 | 1 | 1 RP11-489M13.3  | -      |
| ENSG00000250942 | 5.13E-15 | -2.63127 | 1 | 1 ENPP7P11       | K12354 |
| ENSG00000250945 | 5.13E-15 | -2.63127 | 1 | 1 RP11-810P8.1   | -      |
| ENSG00000250946 | 5.13E-15 | -2.63127 | 1 | 1 RP11-358N4.6   | K12019 |
| ENSG00000250947 | 5.13E-15 | -2.63127 | 1 | 1 TRPC7-AS2      | -      |
| ENSG00000250949 | 5.13E-15 | -2.63127 | 1 | 1 RP11-492L8.2   | -      |
| ENSG00000250951 | 5.13E-15 | -2.63127 | 1 | 1 USP9YP1        | K11840 |
| ENSG00000250954 | 5.13E-15 | -2.63127 | 1 | 1 RP11-79E3.3    | -      |
| ENSG00000250955 | 5.13E-15 | -2.63127 | 1 | 1 AC008592.7     | -      |
| ENSG00000250956 | 5.13E-15 | -2.63127 | 1 | 1 CTB-88F18.3    | K03231 |
| ENSG00000250957 | 5.13E-15 | -2.63127 | 1 | 1 RP11-248N22.1  | -      |
| ENSG00000250958 | 5.13E-15 | -2.63127 | 1 | 1 LINC00492      | -      |
| ENSG00000250962 | 5.13E-15 | -2.63127 | 1 | 1 RP11-69I13.1   | -      |
| ENSG00000250966 | 5.13E-15 | -2.63127 | 1 | 1 RP11-402J6.3   | K11253 |
| ENSG00000250968 | 5.13E-15 | -2.63127 | 1 | 1 RP11-322J23.1  | -      |
| ENSG00000250969 | 5.13E-15 | -2.63127 | 1 | 1 RP11-364L4.3   | -      |
| ENSG00000250971 | 5.13E-15 | -2.63127 | 1 | 1 RP11-696F12.1  | -      |
| ENSG00000250972 | 5.13E-15 | -2.63127 | 1 | 1 CKS1BP5        | K02219 |
| ENSG00000250973 | 5.13E-15 | -2.63127 | 1 | 1 KRTAP13-6P     | -      |
| ENSG00000250974 | 5.13E-15 | -2.63127 | 1 | 1 RP11-122F24.1  | -      |
| ENSG00000250976 | 5.13E-15 | -2.63127 | 1 | 1 RP11-94C24.11  | -      |
| ENSG00000250977 | 5.13E-15 | -2.63127 | 1 | 1 RP11-173E2.2   | -      |
| ENSG00000250979 | 5.13E-15 | -2.63127 | 1 | 1 RP11-656G20.1  | K04984 |
| ENSG00000250980 | 5.13E-15 | -2.63127 | 1 | 1 RP11-529H22.1  | K14842 |

|                 |          |          |   |                  |        |
|-----------------|----------|----------|---|------------------|--------|
| ENSG00000250981 | 5.13E-15 | -2.63127 | 1 | 1 RP11-1902.1    | —      |
| ENSG00000250982 | 5.13E-15 | -2.63127 | 1 | 1 RP11-159J3.1   | K00134 |
| ENSG00000250983 | 5.13E-15 | -2.63127 | 1 | 1 RP11-91K8.2    | —      |
| ENSG00000250984 | 5.13E-15 | -2.63127 | 1 | 1 CTD-2011G17.1  | —      |
| ENSG00000250989 | 5.13E-15 | -2.63127 | 1 | 1 RP11-392E22.5  | —      |
| ENSG00000250992 | 5.13E-15 | -2.63127 | 1 | 1 RP11-826N14.1  | —      |
| ENSG00000250993 | 5.13E-15 | -2.63127 | 1 | 1 RP11-404J23.1  | —      |
| ENSG00000250994 | 5.13E-15 | -2.63127 | 1 | 1 AC005355.1     | —      |
| ENSG00000250995 | 5.13E-15 | -2.63127 | 1 | 1 RP13-128O4.3   | —      |
| ENSG00000250997 | 5.13E-15 | -2.63127 | 1 | 1 RP11-502M1.1   | —      |
| ENSG00000251001 | 5.13E-15 | -2.63127 | 1 | 1 CTD-2193P3.1   | K03386 |
| ENSG00000251002 | 5.13E-15 | -2.63127 | 1 | 1 AE000661.37    | —      |
| ENSG00000251005 | 5.13E-15 | -2.63127 | 1 | 1 RP11-318I4.2   | —      |
| ENSG00000251007 | 5.13E-15 | -2.63127 | 1 | 1 RP11-1415C14.1 | —      |
| ENSG00000251008 | 5.13E-15 | -2.63127 | 1 | 1 ORAOV1P1       | —      |
| ENSG00000251009 | 5.13E-15 | -2.63127 | 1 | 1 RP13-494C23.1  | —      |
| ENSG00000251010 | 5.13E-15 | -2.63127 | 1 | 1 RP11-6L6.7     | —      |
| ENSG00000251011 | 5.13E-15 | -2.63127 | 1 | 1 RP11-402L6.1   | —      |
| ENSG00000251012 | 5.13E-15 | -2.63127 | 1 | 1 RP11-484M3.5   | K17347 |
| ENSG00000251014 | 5.13E-15 | -2.63127 | 1 | 1 RP11-159K7.1   | —      |
| ENSG00000251015 | 5.13E-15 | -2.63127 | 1 | 1 SLC25A30-AS1   | —      |
| ENSG00000251017 | 5.13E-15 | -2.63127 | 1 | 1 RP11-629B11.4  | —      |
| ENSG00000251019 | 5.13E-15 | -2.63127 | 1 | 1 HIGD1AP13      | —      |
| ENSG00000251024 | 5.13E-15 | -2.63127 | 1 | 1 RP11-203B7.1   | —      |
| ENSG00000251025 | 5.13E-15 | -2.63127 | 1 | 1 RP11-751A18.1  | —      |
| ENSG00000251027 | 5.13E-15 | -2.63127 | 1 | 1 CTC-254B4.1    | —      |
| ENSG00000251031 | 5.13E-15 | -2.63127 | 1 | 1 CTC-367F4.1    | —      |
| ENSG00000251032 | 5.13E-15 | -2.63127 | 1 | 1 RP11-483H11.1  | K03347 |
| ENSG00000251033 | 5.13E-15 | -2.63127 | 1 | 1 CTD-2533K21.4  | —      |
| ENSG00000251035 | 5.13E-15 | -2.63127 | 1 | 1 WBP1LP4        | —      |
| ENSG00000251038 | 5.13E-15 | -2.63127 | 1 | 1 AC090958.5     | —      |
| ENSG00000251039 | 5.13E-15 | -2.63127 | 1 | 1 IGKV2D-40      | —      |
| ENSG00000251040 | 5.13E-15 | -2.63127 | 1 | 1 RP11-535C7.1   | —      |
| ENSG00000251041 | 5.13E-15 | -2.63127 | 1 | 1 CTD-2275D24.1  | —      |
| ENSG00000251044 | 5.13E-15 | -2.63127 | 1 | 1 CTD-2582M21.1  | —      |
| ENSG00000251045 | 5.13E-15 | -2.63127 | 1 | 1 CTC-321K16.4   | —      |
| ENSG00000251046 | 5.13E-15 | -2.63127 | 1 | 1 ZNF969P        | K09228 |
| ENSG00000251048 | 5.13E-15 | -2.63127 | 1 | 1 RP11-608B3.1   | —      |
| ENSG00000251049 | 5.13E-15 | -2.63127 | 1 | 1 RP11-685F15.1  | —      |
| ENSG00000251051 | 5.13E-15 | -2.63127 | 1 | 1 ELL2P2         | —      |
| ENSG00000251054 | 5.13E-15 | -2.63127 | 1 | 1 CTD-2215E18.3  | —      |
| ENSG00000251058 | 5.13E-15 | -2.63127 | 1 | 1 RP11-68L1.1    | —      |
| ENSG00000251059 | 5.13E-15 | -2.63127 | 1 | 1 RP11-100N20.1  | —      |
| ENSG00000251061 | 5.13E-15 | -2.63127 | 1 | 1 RP11-789C1.2   | —      |
| ENSG00000251062 | 5.13E-15 | -2.63127 | 1 | 1 CTD-2218G20.1  | K02880 |
| ENSG00000251066 | 5.13E-15 | -2.63127 | 1 | 1 CTC-534B23.1   | —      |
| ENSG00000251072 | 5.13E-15 | -2.63127 | 1 | 1 RP11-434D11.4  | —      |
| ENSG00000251073 | 5.13E-15 | -2.63127 | 1 | 1 NUDT19P5       | —      |
| ENSG00000251074 | 5.13E-15 | -2.63127 | 1 | 1 RP11-1267H10.3 | K00699 |
| ENSG00000251075 | 5.13E-15 | -2.63127 | 1 | 1 HTT-AS         | —      |
| ENSG00000251076 | 5.13E-15 | -2.63127 | 1 | 1 RP11-526F3.1   | —      |
| ENSG00000251078 | 5.13E-15 | -2.63127 | 1 | 1 SLC25A5P9      | K05863 |
| ENSG00000251079 | 5.13E-15 | -2.63127 | 1 | 1 BMS1P2         | K14569 |
| ENSG00000251080 | 5.13E-15 | -2.63127 | 1 | 1 RP11-415C15.1  | —      |
| ENSG00000251081 | 5.13E-15 | -2.63127 | 1 | 1 RP11-713M6.2   | —      |
| ENSG00000251085 | 5.13E-15 | -2.63127 | 1 | 1 RP11-893F2.6   | —      |
| ENSG00000251087 | 5.13E-15 | -2.63127 | 1 | 1 ALG1L3P        | K03842 |
| ENSG00000251088 | 5.13E-15 | -2.63127 | 1 | 1 RP11-325B23.2  | —      |

|                 |          |          |   |                  |        |
|-----------------|----------|----------|---|------------------|--------|
| ENSG00000251090 | 5.13E-15 | -2.63127 | 1 | 1 OR5AC4P        | K04257 |
| ENSG00000251099 | 5.13E-15 | -2.63127 | 1 | 1 CTD-2367A17.1  | K11299 |
| ENSG00000251101 | 5.13E-15 | -2.63127 | 1 | 1 RP11-1267H10.1 | -      |
| ENSG00000251105 | 5.13E-15 | -2.63127 | 1 | 1 RP11-571I18.2  | K02268 |
| ENSG00000251106 | 5.13E-15 | -2.63127 | 1 | 1 FAM206BP       | -      |
| ENSG00000251107 | 5.13E-15 | -2.63127 | 1 | 1 RP11-466P24.4  | K06875 |
| ENSG00000251108 | 5.13E-15 | -2.63127 | 1 | 1 YBX1P5         | K09276 |
| ENSG00000251111 | 5.13E-15 | -2.63127 | 1 | 1 FCF1P8         | K14566 |
| ENSG00000251112 | 5.13E-15 | -2.63127 | 1 | 1 RP11-419C19.3  | -      |
| ENSG00000251113 | 5.13E-15 | -2.63127 | 1 | 1 RP11-68D16.2   | -      |
| ENSG00000251118 | 5.13E-15 | -2.63127 | 1 | 1 CTC-505O3.1    | K11253 |
| ENSG00000251122 | 5.13E-15 | -2.63127 | 1 | 1 NIFKP2         | K14838 |
| ENSG00000251123 | 5.13E-15 | -2.63127 | 1 | 1 RP11-580J4.1   | -      |
| ENSG00000251125 | 5.13E-15 | -2.63127 | 1 | 1 CTD-2335O3.3   | -      |
| ENSG00000251126 | 5.13E-15 | -2.63127 | 1 | 1 RP11-119H12.6  | -      |
| ENSG00000251128 | 5.13E-15 | -2.63127 | 1 | 1 WWC2-AS1       | -      |
| ENSG00000251129 | 5.13E-15 | -2.63127 | 1 | 1 RP11-734I18.1  | -      |
| ENSG00000251132 | 5.13E-15 | -2.63127 | 1 | 1 RP11-438C19.2  | -      |
| ENSG00000251135 | 5.13E-15 | -2.63127 | 1 | 1 AC008565.1     | -      |
| ENSG00000251137 | 5.13E-15 | -2.63127 | 1 | 1 RPL7L1P7       | -      |
| ENSG00000251138 | 5.13E-15 | -2.63127 | 1 | 1 RP11-81H3.2    | -      |
| ENSG00000251139 | 5.13E-15 | -2.63127 | 1 | 1 RP11-701P16.2  | -      |
| ENSG00000251142 | 5.13E-15 | -2.63127 | 1 | 1 RP11-513O17.1  | -      |
| ENSG00000251147 | 5.13E-15 | -2.63127 | 1 | 1 RP11-701P16.3  | K04969 |
| ENSG00000251149 | 5.13E-15 | -2.63127 | 1 | 1 MTND5P5        | -      |
| ENSG00000251152 | 5.13E-15 | -2.63127 | 1 | 1 RP11-281P23.1  | -      |
| ENSG00000251154 | 5.13E-15 | -2.63127 | 1 | 1 AC006153.3     | -      |
| ENSG00000251158 | 5.13E-15 | -2.63127 | 1 | 1 RP11-98J23.1   | -      |
| ENSG00000251159 | 5.13E-15 | -2.63127 | 1 | 1 RP11-500G9.1   | -      |
| ENSG00000251162 | 5.13E-15 | -2.63127 | 1 | 1 RP11-75A5.1    | -      |
| ENSG00000251163 | 5.13E-15 | -2.63127 | 1 | 1 CTD-2325A15.2  | -      |
| ENSG00000251165 | 5.13E-15 | -2.63127 | 1 | 1 F11-AS1        | -      |
| ENSG00000251166 | 5.13E-15 | -2.63127 | 1 | 1 OR7E163P       | K04257 |
| ENSG00000251170 | 5.13E-15 | -2.63127 | 1 | 1 RP11-729M20.1  | -      |
| ENSG00000251172 | 5.13E-15 | -2.63127 | 1 | 1 RP11-529P9.1   | K18079 |
| ENSG00000251173 | 5.13E-15 | -2.63127 | 1 | 1 UCHL1-AS1      | -      |
| ENSG00000251174 | 5.13E-15 | -2.63127 | 1 | 1 TSEN2P1        | K15322 |
| ENSG00000251176 | 5.13E-15 | -2.63127 | 1 | 1 RP11-97E7.1    | -      |
| ENSG00000251177 | 5.13E-15 | -2.63127 | 1 | 1 RP11-401E5.2   | K00699 |
| ENSG00000251178 | 5.13E-15 | -2.63127 | 1 | 1 OR7E21P        | K04257 |
| ENSG00000251182 | 5.13E-15 | -2.63127 | 1 | 1 RP11-617I14.1  | -      |
| ENSG00000251183 | 5.13E-15 | -2.63127 | 1 | 1 AC091962.3     | -      |
| ENSG00000251184 | 5.13E-15 | -2.63127 | 1 | 1 RP11-101E3.5   | K14311 |
| ENSG00000251185 | 5.13E-15 | -2.63127 | 1 | 1 RP11-542G1.1   | -      |
| ENSG00000251186 | 5.13E-15 | -2.63127 | 1 | 1 RP11-689P11.3  | -      |
| ENSG00000251188 | 5.13E-15 | -2.63127 | 1 | 1 RP11-478C6.6   | -      |
| ENSG00000251189 | 5.13E-15 | -2.63127 | 1 | 1 CTD-2196P11.2  | -      |
| ENSG00000251191 | 5.13E-15 | -2.63127 | 1 | 1 LINC00589      | -      |
| ENSG00000251193 | 5.13E-15 | -2.63127 | 1 | 1 RP11-72K17.1   | K18932 |
| ENSG00000251194 | 5.13E-15 | -2.63127 | 1 | 1 RP1-68D18.2    | -      |
| ENSG00000251195 | 5.13E-15 | -2.63127 | 1 | 1 RP11-378N18.1  | -      |
| ENSG00000251199 | 5.13E-15 | -2.63127 | 1 | 1 RP11-400D2.2   | -      |
| ENSG00000251200 | 5.13E-15 | -2.63127 | 1 | 1 RP11-6E9.5     | -      |
| ENSG00000251201 | 5.13E-15 | -2.63127 | 1 | 1 TMED7-TICAM2   | K14825 |
| ENSG00000251204 | 5.13E-15 | -2.63127 | 1 | 1 CTC-278L1.1    | K12482 |
| ENSG00000251206 | 5.13E-15 | -2.63127 | 1 | 1 CTD-2187J20.1  | -      |
| ENSG00000251209 | 5.13E-15 | -2.63127 | 1 | 1 LINC00923      | -      |
| ENSG00000251210 | 5.13E-15 | -2.63127 | 1 | 1 RP11-168E17.1  | -      |



|                 |          |          |   |                 |        |
|-----------------|----------|----------|---|-----------------|--------|
| ENSG00000251211 | 5.13E-15 | -2.63127 | 1 | 1 RP11-889L3.4  | K17759 |
| ENSG00000251212 | 5.13E-15 | -2.63127 | 1 | 1 MTND5P4       | -      |
| ENSG00000251213 | 5.13E-15 | -2.63127 | 1 | 1 RP11-248N22.2 | -      |
| ENSG00000251214 | 5.13E-15 | -2.63127 | 1 | 1 CTD-2308B18.1 | -      |
| ENSG00000251215 | 5.13E-15 | -2.63127 | 1 | 1 GOLGA5P1      | -      |
| ENSG00000251216 | 5.13E-15 | -2.63127 | 1 | 1 RP11-161D15.3 | -      |
| ENSG00000251218 | 5.13E-15 | -2.63127 | 1 | 1 RP11-1057B8.2 | -      |
| ENSG00000251219 | 5.13E-15 | -2.63127 | 1 | 1 EMCN-IT2      | -      |
| ENSG00000251220 | 5.13E-15 | -2.63127 | 1 | 1 RFPL4AP3      | -      |
| ENSG00000251221 | 5.13E-15 | -2.63127 | 1 | 1 CTC-325J23.3  | -      |
| ENSG00000251223 | 5.13E-15 | -2.63127 | 1 | 1 RP11-627H22.5 | K02256 |
| ENSG00000251224 | 5.13E-15 | -2.63127 | 1 | 1 CNOT10-AS1    | -      |
| ENSG00000251226 | 5.13E-15 | -2.63127 | 1 | 1 RP11-469N6.1  | -      |
| ENSG00000251228 | 5.13E-15 | -2.63127 | 1 | 1 RP11-192C21.3 | K00418 |
| ENSG00000251229 | 5.13E-15 | -2.63127 | 1 | 1 RP11-503N18.5 | K01368 |
| ENSG00000251230 | 5.13E-15 | -2.63127 | 1 | 1 RP11-701P16.5 | -      |
| ENSG00000251234 | 5.13E-15 | -2.63127 | 1 | 1 PSMA2P2       | K02726 |
| ENSG00000251235 | 5.13E-15 | -2.63127 | 1 | 1 RP11-156N15.1 | K11095 |
| ENSG00000251236 | 5.13E-15 | -2.63127 | 1 | 1 RP11-468N14.1 | -      |
| ENSG00000251237 | 5.13E-15 | -2.63127 | 1 | 1 CTD-2207L17.2 | -      |
| ENSG00000251239 | 5.13E-15 | -2.63127 | 1 | 1 CTB-22K21.2   | -      |
| ENSG00000251243 | 5.13E-15 | -2.63127 | 1 | 1 AC005178.1    | K17867 |
| ENSG00000251244 | 5.13E-15 | -2.63127 | 1 | 1 RP13-487K5.1  | -      |
| ENSG00000251246 | 5.13E-15 | -2.63127 | 1 | 1 EFNA3         | K05462 |
| ENSG00000251247 | 5.13E-15 | -2.63127 | 1 | 1 ZNF345        | K09228 |
| ENSG00000251248 | 5.13E-15 | -2.63127 | 1 | 1 RP11-223C24.2 | -      |
| ENSG00000251249 | 5.13E-15 | -2.63127 | 1 | 1 RP11-73G16.1  | -      |
| ENSG00000251250 | 5.13E-15 | -2.63127 | 1 | 1 RP11-404K5.4  | -      |
| ENSG00000251252 | 5.13E-15 | -2.63127 | 1 | 1 MTND2P31      | K03879 |
| ENSG00000251253 | 5.13E-15 | -2.63127 | 1 | 1 MTHFD2P4      | K13403 |
| ENSG00000251254 | 5.13E-15 | -2.63127 | 1 | 1 GTF2F2P1      | K03139 |
| ENSG00000251256 | 5.13E-15 | -2.63127 | 1 | 1 RP11-273B19.1 | -      |
| ENSG00000251260 | 5.13E-15 | -2.63127 | 1 | 1 WDFY3-AS1     | -      |
| ENSG00000251261 | 5.13E-15 | -2.63127 | 1 | 1 OR7H2P        | K04257 |
| ENSG00000251264 | 5.13E-15 | -2.63127 | 1 | 1 RP11-545H22.1 | -      |
| ENSG00000251266 | 5.13E-15 | -2.63127 | 1 | 1 RP11-340A13.2 | -      |
| ENSG00000251270 | 5.13E-15 | -2.63127 | 1 | 1 RP11-231L11.1 | -      |
| ENSG00000251273 | 5.13E-15 | -2.63127 | 1 | 1 RP11-549K20.1 | -      |
| ENSG00000251274 | 5.13E-15 | -2.63127 | 1 | 1 RP11-436H11.4 | -      |
| ENSG00000251275 | 5.13E-15 | -2.63127 | 1 | 1 AC006335.2    | -      |
| ENSG00000251276 | 5.13E-15 | -2.63127 | 1 | 1 MAGI2-AS1     | -      |
| ENSG00000251278 | 5.13E-15 | -2.63127 | 1 | 1 AC006499.2    | -      |
| ENSG00000251283 | 5.13E-15 | -2.63127 | 1 | 1 RP11-171N4.2  | -      |
| ENSG00000251284 | 5.13E-15 | -2.63127 | 1 | 1 RP13-644M16.1 | K10523 |
| ENSG00000251285 | 5.13E-15 | -2.63127 | 1 | 1 RP11-147K6.2  | K02978 |
| ENSG00000251286 | 5.13E-15 | -2.63127 | 1 | 1 RP11-588F10.1 | -      |
| ENSG00000251287 | 5.13E-15 | -2.63127 | 1 | 1 ALG1L2        | K03842 |
| ENSG00000251288 | 5.13E-15 | -2.63127 | 1 | 1 RP11-10L12.2  | K14863 |
| ENSG00000251291 | 5.13E-15 | -2.63127 | 1 | 1 RP11-400D2.3  | -      |
| ENSG00000251292 | 5.13E-15 | -2.63127 | 1 | 1 RP11-380P13.2 | -      |
| ENSG00000251293 | 5.13E-15 | -2.63127 | 1 | 1 CTC-552D5.1   | -      |
| ENSG00000251296 | 5.13E-15 | -2.63127 | 1 | 1 AC006499.7    | -      |
| ENSG00000251297 | 5.13E-15 | -2.63127 | 1 | 1 TUBB7P        | K07375 |
| ENSG00000251298 | 5.13E-15 | -2.63127 | 1 | 1 RP11-425A23.1 | -      |
| ENSG00000251299 | 5.13E-15 | -2.63127 | 1 | 1 SLC25A15P3    | K15101 |
| ENSG00000251300 | 5.13E-15 | -2.63127 | 1 | 1 RP11-54P19.1  | -      |
| ENSG00000251301 | 5.13E-15 | -2.63127 | 1 | 1 RP11-81H14.2  | -      |
| ENSG00000251304 | 5.13E-15 | -2.63127 | 1 | 1 RP11-321E2.5  | K03135 |

|                 |          |          |   |                 |        |
|-----------------|----------|----------|---|-----------------|--------|
| ENSG00000251306 | 5.13E-15 | -2.63127 | 1 | 1 NDUFB4P2      | K03960 |
| ENSG00000251308 | 5.13E-15 | -2.63127 | 1 | 1 MRPS33P3      | --     |
| ENSG00000251309 | 5.13E-15 | -2.63127 | 1 | 1 RP11-498M5.2  | --     |
| ENSG00000251310 | 5.13E-15 | -2.63127 | 1 | 1 RP11-706F1.1  | --     |
| ENSG00000251311 | 5.13E-15 | -2.63127 | 1 | 1 RP11-249M12.2 | --     |
| ENSG00000251312 | 5.13E-15 | -2.63127 | 1 | 1 AC004062.2    | --     |
| ENSG00000251313 | 5.13E-15 | -2.63127 | 1 | 1 RP11-747H12.5 | K02984 |
| ENSG00000251317 | 5.13E-15 | -2.63127 | 1 | 1 KLF17P2       | --     |
| ENSG00000251320 | 5.13E-15 | -2.63127 | 1 | 1 CTC-327F10.4  | --     |
| ENSG00000251321 | 5.13E-15 | -2.63127 | 1 | 1 PCAT4         | --     |
| ENSG00000251324 | 5.13E-15 | -2.63127 | 1 | 1 RP11-79P5.5   | --     |
| ENSG00000251325 | 5.13E-15 | -2.63127 | 1 | 1 RP11-415C15.3 | --     |
| ENSG00000251326 | 5.13E-15 | -2.63127 | 1 | 1 RP11-521E5.1  | --     |
| ENSG00000251329 | 5.13E-15 | -2.63127 | 1 | 1 RP11-240A16.1 | --     |
| ENSG00000251330 | 5.13E-15 | -2.63127 | 1 | 1 CTD-2283N19.1 | --     |
| ENSG00000251331 | 5.13E-15 | -2.63127 | 1 | 1 RP11-689K5.3  | --     |
| ENSG00000251332 | 5.13E-15 | -2.63127 | 1 | 1 RP11-177C12.4 | K06697 |
| ENSG00000251334 | 5.13E-15 | -2.63127 | 1 | 1 RP11-317G22.2 | K02866 |
| ENSG00000251336 | 5.13E-15 | -2.63127 | 1 | 1 RP11-540E16.2 | --     |
| ENSG00000251338 | 5.13E-15 | -2.63127 | 1 | 1 AC006499.1    | --     |
| ENSG00000251339 | 5.13E-15 | -2.63127 | 1 | 1 RP11-506N2.1  | --     |
| ENSG00000251340 | 5.13E-15 | -2.63127 | 1 | 1 RP11-461G12.2 | K00412 |
| ENSG00000251342 | 5.13E-15 | -2.63127 | 1 | 1 CTC-235G5.2   | K00802 |
| ENSG00000251345 | 5.13E-15 | -2.63127 | 1 | 1 RP11-392L5.2  | --     |
| ENSG00000251347 | 5.13E-15 | -2.63127 | 1 | 1 IRF5P1        | --     |
| ENSG00000251349 | 5.13E-15 | -2.63127 | 1 | 1 MSANTD3-TMEFF | --     |
| ENSG00000251352 | 5.13E-15 | -2.63127 | 1 | 1 RP11-451H23.2 | K14822 |
| ENSG00000251353 | 5.13E-15 | -2.63127 | 1 | 1 MTND3P5       | --     |
| ENSG00000251354 | 5.13E-15 | -2.63127 | 1 | 1 RP11-697N18.1 | K02987 |
| ENSG00000251356 | 5.13E-15 | -2.63127 | 1 | 1 RAB5CP2       | K07889 |
| ENSG00000251360 | 5.13E-15 | -2.63127 | 1 | 1 KHDC1P1       | --     |
| ENSG00000251363 | 5.13E-15 | -2.63127 | 1 | 1 RP11-129M6.1  | --     |
| ENSG00000251364 | 5.13E-15 | -2.63127 | 1 | 1 CTD-2516F10.2 | --     |
| ENSG00000251366 | 5.13E-15 | -2.63127 | 1 | 1 DBIP2         | --     |
| ENSG00000251367 | 5.13E-15 | -2.63127 | 1 | 1 RP11-231G15.2 | --     |
| ENSG00000251368 | 5.13E-15 | -2.63127 | 1 | 1 RP11-175M2.1  | --     |
| ENSG00000251370 | 5.13E-15 | -2.63127 | 1 | 1 CTD-2201E9.1  | --     |
| ENSG00000251371 | 5.13E-15 | -2.63127 | 1 | 1 CTD-2318H23.1 | --     |
| ENSG00000251372 | 5.13E-15 | -2.63127 | 1 | 1 LINC00499     | --     |
| ENSG00000251373 | 5.13E-15 | -2.63127 | 1 | 1 RP11-68D16.1  | --     |
| ENSG00000251374 | 5.13E-15 | -2.63127 | 1 | 1 RPS23P5       | --     |
| ENSG00000251376 | 5.13E-15 | -2.63127 | 1 | 1 CTD-2313F11.2 | --     |
| ENSG00000251377 | 5.13E-15 | -2.63127 | 1 | 1 RP11-18H21.3  | --     |
| ENSG00000251378 | 5.13E-15 | -2.63127 | 1 | 1 AC096582.9    | --     |
| ENSG00000251379 | 5.13E-15 | -2.63127 | 1 | 1 RP11-484O2.1  | --     |
| ENSG00000251380 | 5.13E-15 | -2.63127 | 1 | 1 C5orf20       | --     |
| ENSG00000251383 | 5.13E-15 | -2.63127 | 1 | 1 RP11-542G1.3  | --     |
| ENSG00000251385 | 5.13E-15 | -2.63127 | 1 | 1 RP11-63H19.2  | K00412 |
| ENSG00000251387 | 5.13E-15 | -2.63127 | 1 | 1 CTB-35F21.3   | --     |
| ENSG00000251388 | 5.13E-15 | -2.63127 | 1 | 1 RP11-427M20.1 | --     |
| ENSG00000251389 | 5.13E-15 | -2.63127 | 1 | 1 YTHDF1P1      | --     |
| ENSG00000251391 | 5.13E-15 | -2.63127 | 1 | 1 RP11-305P14.1 | --     |
| ENSG00000251393 | 5.13E-15 | -2.63127 | 1 | 1 RP1-240K6.3   | --     |
| ENSG00000251395 | 5.13E-15 | -2.63127 | 1 | 1 FTH1P9        | --     |
| ENSG00000251398 | 5.13E-15 | -2.63127 | 1 | 1 RP11-149A7.2  | --     |
| ENSG00000251399 | 5.13E-15 | -2.63127 | 1 | 1 RP11-234K19.1 | --     |
| ENSG00000251401 | 5.13E-15 | -2.63127 | 1 | 1 RP11-11N6.1   | K05432 |
| ENSG00000251405 | 5.13E-15 | -2.63127 | 1 | 1 CTB-109A12.1  | --     |

|                 |          |          |   |                  |        |
|-----------------|----------|----------|---|------------------|--------|
| ENSG00000251407 | 5.13E-15 | -2.63127 | 1 | 1 MTND1P22       | K03878 |
| ENSG00000251408 | 5.13E-15 | -2.63127 | 1 | 1 RP11-586D19.2  | -      |
| ENSG00000251409 | 5.13E-15 | -2.63127 | 1 | 1 AC008592.4     | -      |
| ENSG00000251410 | 5.13E-15 | -2.63127 | 1 | 1 AC007106.1     | -      |
| ENSG00000251412 | 5.13E-15 | -2.63127 | 1 | 1 AC006296.1     | -      |
| ENSG00000251413 | 5.13E-15 | -2.63127 | 1 | 1 RP11-534L6.5   | -      |
| ENSG00000251416 | 5.13E-15 | -2.63127 | 1 | 1 RP11-140M13.1  | -      |
| ENSG00000251418 | 5.13E-15 | -2.63127 | 1 | 1 RP11-655B23.1  | K01940 |
| ENSG00000251419 | 5.13E-15 | -2.63127 | 1 | 1 RP11-524L6.4   | -      |
| ENSG00000251421 | 5.13E-15 | -2.63127 | 1 | 1 CTC-369A16.2   | -      |
| ENSG00000251423 | 5.13E-15 | -2.63127 | 1 | 1 CTB-51A17.1    | -      |
| ENSG00000251424 | 5.13E-15 | -2.63127 | 1 | 1 RP11-468N14.3  | -      |
| ENSG00000251426 | 5.13E-15 | -2.63127 | 1 | 1 CTD-2247C11.4  | -      |
| ENSG00000251427 | 5.13E-15 | -2.63127 | 1 | 1 RP13-644M16.2  | K00699 |
| ENSG00000251430 | 5.13E-15 | -2.63127 | 1 | 1 RP11-63H19.1   | -      |
| ENSG00000251431 | 5.13E-15 | -2.63127 | 1 | 1 AC008984.5     | -      |
| ENSG00000251433 | 5.13E-15 | -2.63127 | 1 | 1 RP11-540E16.1  | K06634 |
| ENSG00000251434 | 5.13E-15 | -2.63127 | 1 | 1 RP11-315A17.1  | -      |
| ENSG00000251436 | 5.13E-15 | -2.63127 | 1 | 1 NUPL1P1        | -      |
| ENSG00000251437 | 5.13E-15 | -2.63127 | 1 | 1 NDUFS5P4       | K03938 |
| ENSG00000251438 | 5.13E-15 | -2.63127 | 1 | 1 RP11-431M7.2   | -      |
| ENSG00000251439 | 5.13E-15 | -2.63127 | 1 | 1 AC006070.12    | -      |
| ENSG00000251440 | 5.13E-15 | -2.63127 | 1 | 1 STMN1P2        | K04381 |
| ENSG00000251443 | 5.13E-15 | -2.63127 | 1 | 1 RP11-113I22.1  | -      |
| ENSG00000251445 | 5.13E-15 | -2.63127 | 1 | 1 RP11-483A20.3  | -      |
| ENSG00000251446 | 5.13E-15 | -2.63127 | 1 | 1 RP11-375B1.2   | -      |
| ENSG00000251447 | 5.13E-15 | -2.63127 | 1 | 1 RP11-517B11.6  | -      |
| ENSG00000251449 | 5.13E-15 | -2.63127 | 1 | 1 MTND1P19       | -      |
| ENSG00000251450 | 5.13E-15 | -2.63127 | 1 | 1 CTC-459I6.1    | -      |
| ENSG00000251452 | 5.13E-15 | -2.63127 | 1 | 1 RP13-539F13.2  | K11114 |
| ENSG00000251453 | 5.13E-15 | -2.63127 | 1 | 1 HAUS1P1        | K16584 |
| ENSG00000251454 | 5.13E-15 | -2.63127 | 1 | 1 RP11-542G1.2   | -      |
| ENSG00000251456 | 5.13E-15 | -2.63127 | 1 | 1 RP11-436H11.5  | -      |
| ENSG00000251458 | 5.13E-15 | -2.63127 | 1 | 1 RP11-844P9.1   | -      |
| ENSG00000251460 | 5.13E-15 | -2.63127 | 1 | 1 RP11-1258F18.1 | -      |
| ENSG00000251463 | 5.13E-15 | -2.63127 | 1 | 1 FKBP4P1        | K09571 |
| ENSG00000251464 | 5.13E-15 | -2.63127 | 1 | 1 RPL7L1P13      | -      |
| ENSG00000251468 | 5.13E-15 | -2.63127 | 1 | 1 RP11-369K16.1  | -      |
| ENSG00000251470 | 5.13E-15 | -2.63127 | 1 | 1 ASN5P4         | K01953 |
| ENSG00000251471 | 5.13E-15 | -2.63127 | 1 | 1 RP11-166D18.1  | -      |
| ENSG00000251473 | 5.13E-15 | -2.63127 | 1 | 1 AC004069.1     | K14305 |
| ENSG00000251476 | 5.13E-15 | -2.63127 | 1 | 1 RP11-531A21.2  | K02256 |
| ENSG00000251477 | 5.13E-15 | -2.63127 | 1 | 1 RP11-74D3.2    | K06777 |
| ENSG00000251478 | 5.13E-15 | -2.63127 | 1 | 1 CTD-2122P11.1  | K09493 |
| ENSG00000251482 | 5.13E-15 | -2.63127 | 1 | 1 RP11-707F2.2   | -      |
| ENSG00000251483 | 5.13E-15 | -2.63127 | 1 | 1 LYPLA1P2       | K06128 |
| ENSG00000251487 | 5.13E-15 | -2.63127 | 1 | 1 RP11-124N3.2   | -      |
| ENSG00000251488 | 5.13E-15 | -2.63127 | 1 | 1 RP11-404I7.2   | -      |
| ENSG00000251489 | 5.13E-15 | -2.63127 | 1 | 1 RP11-736K12.1  | -      |
| ENSG00000251490 | 5.13E-15 | -2.63127 | 1 | 1 RP11-237D3.1   | -      |
| ENSG00000251491 | 5.13E-15 | -2.63127 | 1 | 1 OR7E28P        | K04257 |
| ENSG00000251492 | 5.13E-15 | -2.63127 | 1 | 1 RP11-782E2.2   | -      |
| ENSG00000251493 | 5.13E-15 | -2.63127 | 1 | 1 FOXD1          | K09397 |
| ENSG00000251498 | 5.13E-15 | -2.63127 | 1 | 1 RP11-468N14.10 | K00699 |
| ENSG00000251501 | 5.13E-15 | -2.63127 | 1 | 1 RP11-466J24.1  | K10841 |
| ENSG00000251503 | 5.13E-15 | -2.63127 | 1 | 1 APITD1-CORT    | K05238 |
| ENSG00000251504 | 5.13E-15 | -2.63127 | 1 | 1 LINC01099      | -      |
| ENSG00000251506 | 5.13E-15 | -2.63127 | 1 | 1 CTD-2247C11.2  | -      |

|                 |          |          |   |                 |        |
|-----------------|----------|----------|---|-----------------|--------|
| ENSG00000251508 | 5.13E-15 | -2.63127 | 1 | 1 RP5-862P8.3   | --     |
| ENSG00000251510 | 5.13E-15 | -2.63127 | 1 | 1 AC022486.1    | --     |
| ENSG00000251511 | 5.13E-15 | -2.63127 | 1 | 1 RP11-171N4.1  | --     |
| ENSG00000251513 | 5.13E-15 | -2.63127 | 1 | 1 RP11-155G15.2 | --     |
| ENSG00000251515 | 5.13E-15 | -2.63127 | 1 | 1 CCDC11P1      | --     |
| ENSG00000251516 | 5.13E-15 | -2.63127 | 1 | 1 RP11-10G12.2  | K16467 |
| ENSG00000251517 | 5.13E-15 | -2.63127 | 1 | 1 RP11-109E24.1 | --     |
| ENSG00000251518 | 5.13E-15 | -2.63127 | 1 | 1 CTD-2130F23.2 | --     |
| ENSG00000251521 | 5.13E-15 | -2.63127 | 1 | 1 IMPA1P        | K01092 |
| ENSG00000251523 | 5.13E-15 | -2.63127 | 1 | 1 RP11-724M22.1 | --     |
| ENSG00000251525 | 5.13E-15 | -2.63127 | 1 | 1 TCP11X3P      | --     |
| ENSG00000251526 | 5.13E-15 | -2.63127 | 1 | 1 RP11-381N20.1 | --     |
| ENSG00000251527 | 5.13E-15 | -2.63127 | 1 | 1 RP11-51P8.1   | --     |
| ENSG00000251529 | 5.13E-15 | -2.63127 | 1 | 1 RP11-468N14.5 | K00699 |
| ENSG00000251535 | 5.13E-15 | -2.63127 | 1 | 1 RP11-478C6.1  | --     |
| ENSG00000251536 | 5.13E-15 | -2.63127 | 1 | 1 RP11-572C21.1 | --     |
| ENSG00000251538 | 5.13E-15 | -2.63127 | 1 | 1 RP11-166A12.1 | --     |
| ENSG00000251539 | 5.13E-15 | -2.63127 | 1 | 1 SNX18P24      | K17299 |
| ENSG00000251542 | 5.13E-15 | -2.63127 | 1 | 1 CTC-313D10.1  | --     |
| ENSG00000251543 | 5.13E-15 | -2.63127 | 1 | 1 RP11-60A8.2   | --     |
| ENSG00000251545 | 5.13E-15 | -2.63127 | 1 | 1 RP11-798K23.3 | --     |
| ENSG00000251546 | 5.13E-15 | -2.63127 | 1 | 1 IGKV1D-39     | --     |
| ENSG00000251549 | 5.13E-15 | -2.63127 | 1 | 1 RP11-480D4.5  | --     |
| ENSG00000251553 | 5.13E-15 | -2.63127 | 1 | 1 CTC-463N11.1  | K13179 |
| ENSG00000251554 | 5.13E-15 | -2.63127 | 1 | 1 RP11-395P13.6 | --     |
| ENSG00000251555 | 5.13E-15 | -2.63127 | 1 | 1 RP11-745L13.2 | --     |
| ENSG00000251557 | 5.13E-15 | -2.63127 | 1 | 1 HNRNPKP3      | K12886 |
| ENSG00000251564 | 5.13E-15 | -2.63127 | 1 | 1 AC012441.1    | --     |
| ENSG00000251566 | 5.13E-15 | -2.63127 | 1 | 1 HMGB1P35      | K10802 |
| ENSG00000251567 | 5.13E-15 | -2.63127 | 1 | 1 RP11-775H9.2  | --     |
| ENSG00000251568 | 5.13E-15 | -2.63127 | 1 | 1 ALG3P1        | K03845 |
| ENSG00000251569 | 5.13E-15 | -2.63127 | 1 | 1 RP11-724O16.1 | K16748 |
| ENSG00000251571 | 5.13E-15 | -2.63127 | 1 | 1 DDX3YP3       | K11594 |
| ENSG00000251572 | 5.13E-15 | -2.63127 | 1 | 1 AF213884.1    | K09228 |
| ENSG00000251573 | 5.13E-15 | -2.63127 | 1 | 1 CTD-2089N3.2  | --     |
| ENSG00000251575 | 5.13E-15 | -2.63127 | 1 | 1 CTD-2170G1.2  | --     |
| ENSG00000251578 | 5.13E-15 | -2.63127 | 1 | 1 TRBV21-1      | --     |
| ENSG00000251579 | 5.13E-15 | -2.63127 | 1 | 1 RP11-39E3.5   | --     |
| ENSG00000251583 | 5.13E-15 | -2.63127 | 1 | 1 AC008427.2    | --     |
| ENSG00000251584 | 5.13E-15 | -2.63127 | 1 | 1 RP11-440I14.3 | --     |
| ENSG00000251585 | 5.13E-15 | -2.63127 | 1 | 1 CTD-2299E8.1  | --     |
| ENSG00000251586 | 5.13E-15 | -2.63127 | 1 | 1 TET2-AS1      | --     |
| ENSG00000251587 | 5.13E-15 | -2.63127 | 1 | 1 LDHAP1        | K00016 |
| ENSG00000251588 | 5.13E-15 | -2.63127 | 1 | 1 RP11-698E18.1 | K10313 |
| ENSG00000251591 | 5.13E-15 | -2.63127 | 1 | 1 CTD-2197M16.1 | --     |
| ENSG00000251595 | 5.13E-15 | -2.63127 | 1 | 1 ABCA11P       | K05652 |
| ENSG00000251597 | 5.13E-15 | -2.63127 | 1 | 1 RPL37P25      | --     |
| ENSG00000251599 | 5.13E-15 | -2.63127 | 1 | 1 RP11-232L2.2  | --     |
| ENSG00000251600 | 5.13E-15 | -2.63127 | 1 | 1 RP11-673E1.1  | --     |
| ENSG00000251601 | 5.13E-15 | -2.63127 | 1 | 1 RP11-317O24.2 | --     |
| ENSG00000251604 | 5.13E-15 | -2.63127 | 1 | 1 RP11-79P5.7   | --     |
| ENSG00000251605 | 5.13E-15 | -2.63127 | 1 | 1 CTD-2037K23.1 | --     |
| ENSG00000251606 | 5.13E-15 | -2.63127 | 1 | 1 CTD-2215E18.1 | K07179 |
| ENSG00000251608 | 5.13E-15 | -2.63127 | 1 | 1 OR12D1        | K04257 |
| ENSG00000251609 | 5.13E-15 | -2.63127 | 1 | 1 SETP12        | --     |
| ENSG00000251610 | 5.13E-15 | -2.63127 | 1 | 1 RP11-77P16.3  | --     |
| ENSG00000251613 | 5.13E-15 | -2.63127 | 1 | 1 CTC-347C20.1  | --     |
| ENSG00000251614 | 5.13E-15 | -2.63127 | 1 | 1 HSPA8P19      | --     |

|                 |          |          |   |                 |        |
|-----------------|----------|----------|---|-----------------|--------|
| ENSG00000251616 | 5.13E-15 | -2.63127 | 1 | 1 RP11-485M7.3  | --     |
| ENSG00000251617 | 5.13E-15 | -2.63127 | 1 | 1 RP11-382F24.1 | --     |
| ENSG00000251618 | 5.13E-15 | -2.63127 | 1 | 1 AC007322.3    | --     |
| ENSG00000251619 | 5.13E-15 | -2.63127 | 1 | 1 RP11-756P10.5 | --     |
| ENSG00000251621 | 5.13E-15 | -2.63127 | 1 | 1 AC009487.5    | --     |
| ENSG00000251623 | 5.13E-15 | -2.63127 | 1 | 1 RP11-826N14.4 | --     |
| ENSG00000251624 | 5.13E-15 | -2.63127 | 1 | 1 UNC93B7       | K04257 |
| ENSG00000251627 | 5.13E-15 | -2.63127 | 1 | 1 CTD-2089O24.2 | --     |
| ENSG00000251628 | 5.13E-15 | -2.63127 | 1 | 1 RP11-371M22.1 | --     |
| ENSG00000251629 | 5.13E-15 | -2.63127 | 1 | 1 RP11-774D14.1 | --     |
| ENSG00000251630 | 5.13E-15 | -2.63127 | 1 | 1 RP11-241F15.9 | K17299 |
| ENSG00000251632 | 5.13E-15 | -2.63127 | 1 | 1 RP11-714L20.1 | --     |
| ENSG00000251633 | 5.13E-15 | -2.63127 | 1 | 1 GYG1P1        | K00750 |
| ENSG00000251635 | 5.13E-15 | -2.63127 | 1 | 1 RP11-213G21.2 | --     |
| ENSG00000251636 | 5.13E-15 | -2.63127 | 1 | 1 EMCN-IT1      | --     |
| ENSG00000251637 | 5.13E-15 | -2.63127 | 1 | 1 RP11-119D9.1  | --     |
| ENSG00000251638 | 5.13E-15 | -2.63127 | 1 | 1 AC006390.4    | --     |
| ENSG00000251639 | 5.13E-15 | -2.63127 | 1 | 1 RP11-20I20.1  | K04354 |
| ENSG00000251642 | 5.13E-15 | -2.63127 | 1 | 1 RP11-600L4.1  | --     |
| ENSG00000251643 | 5.13E-15 | -2.63127 | 1 | 1 RP11-91J3.1   | K12177 |
| ENSG00000251644 | 5.13E-15 | -2.63127 | 1 | 1 RP11-442P12.1 | K00760 |
| ENSG00000251647 | 5.13E-15 | -2.63127 | 1 | 1 RP11-576N17.4 | --     |
| ENSG00000251649 | 5.13E-15 | -2.63127 | 1 | 1 RP11-318I4.1  | --     |
| ENSG00000251652 | 5.13E-15 | -2.63127 | 1 | 1 RP11-20I20.2  | --     |
| ENSG00000251654 | 5.13E-15 | -2.63127 | 1 | 1 RP11-192H6.2  | --     |
| ENSG00000251655 | 5.13E-15 | -2.63127 | 1 | 1 PRB1          | K13911 |
| ENSG00000251656 | 5.13E-15 | -2.63127 | 1 | 1 CTD-2201E18.4 | --     |
| ENSG00000251660 | 5.13E-15 | -2.63127 | 1 | 1 AC007036.5    | --     |
| ENSG00000251662 | 5.13E-15 | -2.63127 | 1 | 1 CTC-369A16.3  | --     |
| ENSG00000251663 | 5.13E-15 | -2.63127 | 1 | 1 SUMO2P5       | K12160 |
| ENSG00000251664 | 5.13E-15 | -2.63127 | 1 | 1 PCDHA12       | K16493 |
| ENSG00000251668 | 5.13E-15 | -2.63127 | 1 | 1 RP11-466P24.5 | K08789 |
| ENSG00000251670 | 5.13E-15 | -2.63127 | 1 | 1 CTD-2532K18.1 | --     |
| ENSG00000251675 | 5.13E-15 | -2.63127 | 1 | 1 CTC-458I2.2   | --     |
| ENSG00000251676 | 5.13E-15 | -2.63127 | 1 | 1 RP11-614F17.2 | --     |
| ENSG00000251678 | 5.13E-15 | -2.63127 | 1 | 1 CTD-2296D1.1  | --     |
| ENSG00000251680 | 5.13E-15 | -2.63127 | 1 | 1 CTC-575N7.1   | --     |
| ENSG00000251686 | 5.13E-15 | -2.63127 | 1 | 1 OR10J8P       | K04257 |
| ENSG00000251687 | 5.13E-15 | -2.63127 | 1 | 1 RP11-181K12.2 | --     |
| ENSG00000251688 | 5.13E-15 | -2.63127 | 1 | 1 RP11-752L20.5 | --     |
| ENSG00000251689 | 5.13E-15 | -2.63127 | 1 | 1 RP11-478C6.5  | K09228 |
| ENSG00000251691 | 5.13E-15 | -2.63127 | 1 | 1 RP11-618I10.4 | K00699 |
| ENSG00000251694 | 5.13E-15 | -2.63127 | 1 | 1 USP17L9P      | K11845 |
| ENSG00000251696 | 5.13E-15 | -2.63127 | 1 | 1 AL583832.1    | --     |
| ENSG00000251697 | 5.13E-15 | -2.63127 | 1 | 1 RN7SKP24      | --     |
| ENSG00000251698 | 5.13E-15 | -2.63127 | 1 | 1 RNA5SP445     | --     |
| ENSG00000251699 | 5.13E-15 | -2.63127 | 1 | 1 SNORD27       | --     |
| ENSG00000251700 | 5.13E-15 | -2.63127 | 1 | 1 SNORD112      | --     |
| ENSG00000251702 | 5.13E-15 | -2.63127 | 1 | 1 RNU6-857P     | --     |
| ENSG00000251703 | 5.13E-15 | -2.63127 | 1 | 1 RNU6-998P     | --     |
| ENSG00000251704 | 5.13E-15 | -2.63127 | 1 | 1 SNORA40       | --     |
| ENSG00000251705 | 5.13E-15 | -2.63127 | 1 | 1 RNA5-8SP6     | --     |
| ENSG00000251706 | 5.13E-15 | -2.63127 | 1 | 1 RNU7-61P      | --     |
| ENSG00000251707 | 5.13E-15 | -2.63127 | 1 | 1 RNU7-37P      | --     |
| ENSG00000251708 | 5.13E-15 | -2.63127 | 1 | 1 RNU7-198P     | --     |
| ENSG00000251709 | 5.13E-15 | -2.63127 | 1 | 1 snoU13        | --     |
| ENSG00000251710 | 5.13E-15 | -2.63127 | 1 | 1 AC010295.1    | --     |
| ENSG00000251711 | 5.13E-15 | -2.63127 | 1 | 1 RNU6-632P     | --     |

|                 |          |          |   |               |    |
|-----------------|----------|----------|---|---------------|----|
| ENSG00000251712 | 5.13E-15 | -2.63127 | 1 | 1 RNU7-20P    | -- |
| ENSG00000251713 | 5.13E-15 | -2.63127 | 1 | 1 AL050321.1  | -- |
| ENSG00000251714 | 5.13E-15 | -2.63127 | 1 | 1 RN7SKP67    | -- |
| ENSG00000251715 | 5.13E-15 | -2.63127 | 1 | 1 SNORA68     | -- |
| ENSG00000251716 | 5.13E-15 | -2.63127 | 1 | 1 Y_RNA       | -- |
| ENSG00000251717 | 5.13E-15 | -2.63127 | 1 | 1 RNA5SP419   | -- |
| ENSG00000251718 | 5.13E-15 | -2.63127 | 1 | 1 RNU2-13P    | -- |
| ENSG00000251719 | 5.13E-15 | -2.63127 | 1 | 1 RNU6-408P   | -- |
| ENSG00000251721 | 5.13E-15 | -2.63127 | 1 | 1 snoZ5       | -- |
| ENSG00000251722 | 5.13E-15 | -2.63127 | 1 | 1 RNU5E-3P    | -- |
| ENSG00000251723 | 5.13E-15 | -2.63127 | 1 | 1 RNU6-357P   | -- |
| ENSG00000251724 | 5.13E-15 | -2.63127 | 1 | 1 RNU7-175P   | -- |
| ENSG00000251725 | 5.13E-15 | -2.63127 | 1 | 1 MIR2277     | -- |
| ENSG00000251726 | 5.13E-15 | -2.63127 | 1 | 1 RNU7-41P    | -- |
| ENSG00000251727 | 5.13E-15 | -2.63127 | 1 | 1 RNU6-488P   | -- |
| ENSG00000251728 | 5.13E-15 | -2.63127 | 1 | 1 Y_RNA       | -- |
| ENSG00000251729 | 5.13E-15 | -2.63127 | 1 | 1 RNA5SP401   | -- |
| ENSG00000251730 | 5.13E-15 | -2.63127 | 1 | 1 SNORA4      | -- |
| ENSG00000251731 | 5.13E-15 | -2.63127 | 1 | 1 AL512359.1  | -- |
| ENSG00000251732 | 5.13E-15 | -2.63127 | 1 | 1 RN7SKP122   | -- |
| ENSG00000251735 | 5.13E-15 | -2.63127 | 1 | 1 SNORA25     | -- |
| ENSG00000251737 | 5.13E-15 | -2.63127 | 1 | 1 snoU13      | -- |
| ENSG00000251740 | 5.13E-15 | -2.63127 | 1 | 1 U8          | -- |
| ENSG00000251741 | 5.13E-15 | -2.63127 | 1 | 1 RNU4ATAC13P | -- |
| ENSG00000251742 | 5.13E-15 | -2.63127 | 1 | 1 RN7SKP13    | -- |
| ENSG00000251744 | 5.13E-15 | -2.63127 | 1 | 1 SNORA25     | -- |
| ENSG00000251745 | 5.13E-15 | -2.63127 | 1 | 1 RNU7-124P   | -- |
| ENSG00000251746 | 5.13E-15 | -2.63127 | 1 | 1 RNA5SP112   | -- |
| ENSG00000251747 | 5.13E-15 | -2.63127 | 1 | 1 RNU7-60P    | -- |
| ENSG00000251748 | 5.13E-15 | -2.63127 | 1 | 1 RNU4ATAC11P | -- |
| ENSG00000251750 | 5.13E-15 | -2.63127 | 1 | 1 RNU5F-8P    | -- |
| ENSG00000251751 | 5.13E-15 | -2.63127 | 1 | 1 RN7SKP46    | -- |
| ENSG00000251752 | 5.13E-15 | -2.63127 | 1 | 1 RNU4-29P    | -- |
| ENSG00000251753 | 5.13E-15 | -2.63127 | 1 | 1 RNU6-75P    | -- |
| ENSG00000251754 | 5.13E-15 | -2.63127 | 1 | 1 RNU6-999P   | -- |
| ENSG00000251755 | 5.13E-15 | -2.63127 | 1 | 1 RNU7-131P   | -- |
| ENSG00000251756 | 5.13E-15 | -2.63127 | 1 | 1 RNA5SP385   | -- |
| ENSG00000251757 | 5.13E-15 | -2.63127 | 1 | 1 RNU6-848P   | -- |
| ENSG00000251758 | 5.13E-15 | -2.63127 | 1 | 1 RNU6-350P   | -- |
| ENSG00000251759 | 5.13E-15 | -2.63127 | 1 | 1 RN7SKP298   | -- |
| ENSG00000251760 | 5.13E-15 | -2.63127 | 1 | 1 RNA5SP418   | -- |
| ENSG00000251761 | 5.13E-15 | -2.63127 | 1 | 1 RNU6-138P   | -- |
| ENSG00000251762 | 5.13E-15 | -2.63127 | 1 | 1 snoU13      | -- |
| ENSG00000251763 | 5.13E-15 | -2.63127 | 1 | 1 RNU6-470P   | -- |
| ENSG00000251764 | 5.13E-15 | -2.63127 | 1 | 1 RNA5SP446   | -- |
| ENSG00000251766 | 5.13E-15 | -2.63127 | 1 | 1 RNA5SP518   | -- |
| ENSG00000251767 | 5.13E-15 | -2.63127 | 1 | 1 RNU7-8P     | -- |
| ENSG00000251768 | 5.13E-15 | -2.63127 | 1 | 1 RNA5SP217   | -- |
| ENSG00000251769 | 5.13E-15 | -2.63127 | 1 | 1 SNORD112    | -- |
| ENSG00000251770 | 5.13E-15 | -2.63127 | 1 | 1 RNA5SP486   | -- |
| ENSG00000251771 | 5.13E-15 | -2.63127 | 1 | 1 RNU6-1033P  | -- |
| ENSG00000251772 | 5.13E-15 | -2.63127 | 1 | 1 AL117380.2  | -- |
| ENSG00000251773 | 5.13E-15 | -2.63127 | 1 | 1 RNU6-1129P  | -- |
| ENSG00000251774 | 5.13E-15 | -2.63127 | 1 | 1 RNU6-377P   | -- |
| ENSG00000251776 | 5.13E-15 | -2.63127 | 1 | 1 RN7SKP242   | -- |
| ENSG00000251777 | 5.13E-15 | -2.63127 | 1 | 1 RNU6-404P   | -- |
| ENSG00000251778 | 5.13E-15 | -2.63127 | 1 | 1 SNORA3      | -- |
| ENSG00000251779 | 5.13E-15 | -2.63127 | 1 | 1 Y_RNA       | -- |

|                 |          |          |   |                   |    |
|-----------------|----------|----------|---|-------------------|----|
| ENSG00000251780 | 5.13E-15 | -2.63127 | 1 | 1 RNU7-150P       | -- |
| ENSG00000251781 | 5.13E-15 | -2.63127 | 1 | 1 RNA5SP356       | -- |
| ENSG00000251783 | 5.13E-15 | -2.63127 | 1 | 1 RNU6-1170P      | -- |
| ENSG00000251785 | 5.13E-15 | -2.63127 | 1 | 1 RNA5SP20        | -- |
| ENSG00000251787 | 5.13E-15 | -2.63127 | 1 | 1 RNU7-47P        | -- |
| ENSG00000251788 | 5.13E-15 | -2.63127 | 1 | 1 RNU5A-7P        | -- |
| ENSG00000251789 | 5.13E-15 | -2.63127 | 1 | 1 RNU4-57P        | -- |
| ENSG00000251792 | 5.13E-15 | -2.63127 | 1 | 1 Y_RNA           | -- |
| ENSG00000251793 | 5.13E-15 | -2.63127 | 1 | 1 U3              | -- |
| ENSG00000251794 | 5.13E-15 | -2.63127 | 1 | 1 RNU6-237P       | -- |
| ENSG00000251796 | 5.13E-15 | -2.63127 | 1 | 1 SNORA70         | -- |
| ENSG00000251797 | 5.13E-15 | -2.63127 | 1 | 1 RNU7-98P        | -- |
| ENSG00000251798 | 5.13E-15 | -2.63127 | 1 | 1 RNU6-863P       | -- |
| ENSG00000251799 | 5.13E-15 | -2.63127 | 1 | 1 Y_RNA           | -- |
| ENSG00000251800 | 5.13E-15 | -2.63127 | 1 | 1 U3              | -- |
| ENSG00000251801 | 5.13E-15 | -2.63127 | 1 | 1 SNORD112        | -- |
| ENSG00000251802 | 5.13E-15 | -2.63127 | 1 | 1 SNORA31         | -- |
| ENSG00000251803 | 5.13E-15 | -2.63127 | 1 | 1 Y_RNA           | -- |
| ENSG00000251804 | 5.13E-15 | -2.63127 | 1 | 1 RNU6-1294P      | -- |
| ENSG00000251805 | 5.13E-15 | -2.63127 | 1 | 1 SCARNA21        | -- |
| ENSG00000251807 | 5.13E-15 | -2.63127 | 1 | 1 RNU6-202P       | -- |
| ENSG00000251808 | 5.13E-15 | -2.63127 | 1 | 1 AC024198.1      | -- |
| ENSG00000251809 | 5.13E-15 | -2.63127 | 1 | 1 RN7SKP14        | -- |
| ENSG00000251810 | 5.13E-15 | -2.63127 | 1 | 1 RN7SKP132       | -- |
| ENSG00000251811 | 5.13E-15 | -2.63127 | 1 | 1 Y_RNA           | -- |
| ENSG00000251812 | 5.13E-15 | -2.63127 | 1 | 1 Y_RNA           | -- |
| ENSG00000251813 | 5.13E-15 | -2.63127 | 1 | 1 RNU6-983P       | -- |
| ENSG00000251814 | 5.13E-15 | -2.63127 | 1 | 1 RN7SKP18        | -- |
| ENSG00000251815 | 5.13E-15 | -2.63127 | 1 | 1 SNORD116-26     | -- |
| ENSG00000251816 | 5.13E-15 | -2.63127 | 1 | 1 RNA5SP157       | -- |
| ENSG00000251817 | 5.13E-15 | -2.63127 | 1 | 1 snoU13          | -- |
| ENSG00000251818 | 5.13E-15 | -2.63127 | 1 | 1 SCARNA20        | -- |
| ENSG00000251819 | 5.13E-15 | -2.63127 | 1 | 1 RNU6-322P       | -- |
| ENSG00000251822 | 5.13E-15 | -2.63127 | 1 | 1 SNORA19         | -- |
| ENSG00000251823 | 5.13E-15 | -2.63127 | 1 | 1 RNA5SP162       | -- |
| ENSG00000251824 | 5.13E-15 | -2.63127 | 1 | 1 SNORD112        | -- |
| ENSG00000251825 | 5.13E-15 | -2.63127 | 1 | 1 RN7SKP19        | -- |
| ENSG00000251828 | 5.13E-15 | -2.63127 | 1 | 1 SNORA31         | -- |
| ENSG00000251829 | 5.13E-15 | -2.63127 | 1 | 1 RNA5SP436       | -- |
| ENSG00000251830 | 5.13E-15 | -2.63127 | 1 | 1 SNORD46         | -- |
| ENSG00000251831 | 5.13E-15 | -2.63127 | 1 | 1 RNU6-1114P      | -- |
| ENSG00000251833 | 5.13E-15 | -2.63127 | 1 | 1 snoR26          | -- |
| ENSG00000251834 | 5.13E-15 | -2.63127 | 1 | 1 RNU6-319P       | -- |
| ENSG00000251835 | 5.13E-15 | -2.63127 | 1 | 1 RNU6ATAC32P     | -- |
| ENSG00000251836 | 5.13E-15 | -2.63127 | 1 | 1 U3              | -- |
| ENSG00000251837 | 5.13E-15 | -2.63127 | 1 | 1 Y_RNA           | -- |
| ENSG00000251838 | 5.13E-15 | -2.63127 | 1 | 1 SNORA31         | -- |
| ENSG00000251839 | 5.13E-15 | -2.63127 | 1 | 1 RNU7-12P        | -- |
| ENSG00000251840 | 5.13E-15 | -2.63127 | 1 | 1 RN7SKP155       | -- |
| ENSG00000251841 | 5.13E-15 | -2.63127 | 1 | 1 RNU6-1334P      | -- |
| ENSG00000251842 | 5.13E-15 | -2.63127 | 1 | 1 RNU6-732P       | -- |
| ENSG00000251843 | 5.13E-15 | -2.63127 | 1 | 1 RNU6-803P       | -- |
| ENSG00000251844 | 5.13E-15 | -2.63127 | 1 | 1 snoMe28S-Am2634 | -- |
| ENSG00000251846 | 5.13E-15 | -2.63127 | 1 | 1 SNORD36         | -- |
| ENSG00000251847 | 5.13E-15 | -2.63127 | 1 | 1 snoZ13_snr52    | -- |
| ENSG00000251848 | 5.13E-15 | -2.63127 | 1 | 1 snoU13          | -- |
| ENSG00000251849 | 5.13E-15 | -2.63127 | 1 | 1 AC010887.1      | -- |
| ENSG00000251850 | 5.13E-15 | -2.63127 | 1 | 1 RNA5SP96        | -- |

|                 |          |          |   |               |    |
|-----------------|----------|----------|---|---------------|----|
| ENSG00000251851 | 5.13E-15 | -2.63127 | 1 | 1 RNU6-772P   | -- |
| ENSG00000251852 | 5.13E-15 | -2.63127 | 1 | 1 Y_RNA       | -- |
| ENSG00000251854 | 5.13E-15 | -2.63127 | 1 | 1 RNU6-507P   | -- |
| ENSG00000251856 | 5.13E-15 | -2.63127 | 1 | 1 MIR449C     | -- |
| ENSG00000251857 | 5.13E-15 | -2.63127 | 1 | 1 RNA5SP362   | -- |
| ENSG00000251858 | 5.13E-15 | -2.63127 | 1 | 1 SNORA31     | -- |
| ENSG00000251859 | 5.13E-15 | -2.63127 | 1 | 1 RNU6-1288P  | -- |
| ENSG00000251860 | 5.13E-15 | -2.63127 | 1 | 1 snoU13      | -- |
| ENSG00000251861 | 5.13E-15 | -2.63127 | 1 | 1 SCARNA20    | -- |
| ENSG00000251862 | 5.13E-15 | -2.63127 | 1 | 1 MIR1343     | -- |
| ENSG00000251863 | 5.13E-15 | -2.63127 | 1 | 1 SNORD112    | -- |
| ENSG00000251864 | 5.13E-15 | -2.63127 | 1 | 1 Y_RNA       | -- |
| ENSG00000251865 | 5.13E-15 | -2.63127 | 1 | 1 RNU6-518P   | -- |
| ENSG00000251866 | 5.13E-15 | -2.63127 | 1 | 1 SCARNA21    | -- |
| ENSG00000251868 | 5.13E-15 | -2.63127 | 1 | 1 RNU7-71P    | -- |
| ENSG00000251870 | 5.13E-15 | -2.63127 | 1 | 1 RNU2-69P    | -- |
| ENSG00000251871 | 5.13E-15 | -2.63127 | 1 | 1 AC016113.1  | -- |
| ENSG00000251872 | 5.13E-15 | -2.63127 | 1 | 1 RNU6-688P   | -- |
| ENSG00000251873 | 5.13E-15 | -2.63127 | 1 | 1 RNA5SP182   | -- |
| ENSG00000251874 | 5.13E-15 | -2.63127 | 1 | 1 RNU6-615P   | -- |
| ENSG00000251875 | 5.13E-15 | -2.63127 | 1 | 1 RNU5F-2P    | -- |
| ENSG00000251876 | 5.13E-15 | -2.63127 | 1 | 1 AL035106.1  | -- |
| ENSG00000251877 | 5.13E-15 | -2.63127 | 1 | 1 RNU2-45P    | -- |
| ENSG00000251878 | 5.13E-15 | -2.63127 | 1 | 1 SNORD79     | -- |
| ENSG00000251879 | 5.13E-15 | -2.63127 | 1 | 1 AC010874.1  | -- |
| ENSG00000251880 | 5.13E-15 | -2.63127 | 1 | 1 RNU7-75P    | -- |
| ENSG00000251881 | 5.13E-15 | -2.63127 | 1 | 1 SNORD112    | -- |
| ENSG00000251882 | 5.13E-15 | -2.63127 | 1 | 1 RNU6-475P   | -- |
| ENSG00000251883 | 5.13E-15 | -2.63127 | 1 | 1 RNU6ATAC17P | -- |
| ENSG00000251885 | 5.13E-15 | -2.63127 | 1 | 1 RNA5SP381   | -- |
| ENSG00000251886 | 5.13E-15 | -2.63127 | 1 | 1 RNU6-120P   | -- |
| ENSG00000251887 | 5.13E-15 | -2.63127 | 1 | 1 RNU6-760P   | -- |
| ENSG00000251888 | 5.13E-15 | -2.63127 | 1 | 1 RN7SKP190   | -- |
| ENSG00000251889 | 5.13E-15 | -2.63127 | 1 | 1 RNU4-49P    | -- |
| ENSG00000251890 | 5.13E-15 | -2.63127 | 1 | 1 RNA5SP497   | -- |
| ENSG00000251891 | 5.13E-15 | -2.63127 | 1 | 1 RNU7-79P    | -- |
| ENSG00000251892 | 5.13E-15 | -2.63127 | 1 | 1 RNU7-84P    | -- |
| ENSG00000251893 | 5.13E-15 | -2.63127 | 1 | 1 SNORA70     | -- |
| ENSG00000251894 | 5.13E-15 | -2.63127 | 1 | 1 RNU6-872P   | -- |
| ENSG00000251895 | 5.13E-15 | -2.63127 | 1 | 1 RNU6-976P   | -- |
| ENSG00000251896 | 5.13E-15 | -2.63127 | 1 | 1 SNORD116-27 | -- |
| ENSG00000251897 | 5.13E-15 | -2.63127 | 1 | 1 RNU6-916P   | -- |
| ENSG00000251898 | 5.13E-15 | -2.63127 | 1 | 1 SCARNA11    | -- |
| ENSG00000251899 | 5.13E-15 | -2.63127 | 1 | 1 AC104169.1  | -- |
| ENSG00000251900 | 5.13E-15 | -2.63127 | 1 | 1 VTRNA2-2P   | -- |
| ENSG00000251901 | 5.13E-15 | -2.63127 | 1 | 1 snR65       | -- |
| ENSG00000251902 | 5.13E-15 | -2.63127 | 1 | 1 RNU6-51P    | -- |
| ENSG00000251904 | 5.13E-15 | -2.63127 | 1 | 1 RNA5SP272   | -- |
| ENSG00000251905 | 5.13E-15 | -2.63127 | 1 | 1 RNU7-2P     | -- |
| ENSG00000251906 | 5.13E-15 | -2.63127 | 1 | 1 RNU6-351P   | -- |
| ENSG00000251907 | 5.13E-15 | -2.63127 | 1 | 1 RNU6-240P   | -- |
| ENSG00000251908 | 5.13E-15 | -2.63127 | 1 | 1 RNU6-491P   | -- |
| ENSG00000251909 | 5.13E-15 | -2.63127 | 1 | 1 U8          | -- |
| ENSG00000251911 | 5.13E-15 | -2.63127 | 1 | 1 SNORD112    | -- |
| ENSG00000251912 | 5.13E-15 | -2.63127 | 1 | 1 AL954742.1  | -- |
| ENSG00000251913 | 5.13E-15 | -2.63127 | 1 | 1 RNU6-513P   | -- |
| ENSG00000251914 | 5.13E-15 | -2.63127 | 1 | 1 RNU7-200P   | -- |
| ENSG00000251915 | 5.13E-15 | -2.63127 | 1 | 1 RNA5SP406   | -- |



|                 |          |          |   |               |    |
|-----------------|----------|----------|---|---------------|----|
| ENSG00000251916 | 5.13E-15 | -2.63127 | 1 | 1 RNU1-61P    | -- |
| ENSG00000251917 | 5.13E-15 | -2.63127 | 1 | 1 RNU1-86P    | -- |
| ENSG00000251918 | 5.13E-15 | -2.63127 | 1 | 1 SNORD112    | -- |
| ENSG00000251919 | 5.13E-15 | -2.63127 | 1 | 1 RNU7-105P   | -- |
| ENSG00000251920 | 5.13E-15 | -2.63127 | 1 | 1 RNA5SP216   | -- |
| ENSG00000251922 | 5.13E-15 | -2.63127 | 1 | 1 SNORA14     | -- |
| ENSG00000251923 | 5.13E-15 | -2.63127 | 1 | 1 RNU6-276P   | -- |
| ENSG00000251924 | 5.13E-15 | -2.63127 | 1 | 1 RNA5SP408   | -- |
| ENSG00000251925 | 5.13E-15 | -2.63127 | 1 | 1 SNORA70     | -- |
| ENSG00000251926 | 5.13E-15 | -2.63127 | 1 | 1 snoU13      | -- |
| ENSG00000251927 | 5.13E-15 | -2.63127 | 1 | 1 AC099539.1  | -- |
| ENSG00000251928 | 5.13E-15 | -2.63127 | 1 | 1 RNU6-585P   | -- |
| ENSG00000251929 | 5.13E-15 | -2.63127 | 1 | 1 RNU6-189P   | -- |
| ENSG00000251930 | 5.13E-15 | -2.63127 | 1 | 1 U3          | -- |
| ENSG00000251931 | 5.13E-15 | -2.63127 | 1 | 1 RNU6-871P   | -- |
| ENSG00000251933 | 5.13E-15 | -2.63127 | 1 | 1 AL596330.1  | -- |
| ENSG00000251934 | 5.13E-15 | -2.63127 | 1 | 1 RNU6-1143P  | -- |
| ENSG00000251935 | 5.13E-15 | -2.63127 | 1 | 1 RN7SKP179   | -- |
| ENSG00000251936 | 5.13E-15 | -2.63127 | 1 | 1 RNA5SP249   | -- |
| ENSG00000251937 | 5.13E-15 | -2.63127 | 1 | 1 RNU7-129P   | -- |
| ENSG00000251938 | 5.13E-15 | -2.63127 | 1 | 1 snoU13      | -- |
| ENSG00000251939 | 5.13E-15 | -2.63127 | 1 | 1 RNU6-1278P  | -- |
| ENSG00000251940 | 5.13E-15 | -2.63127 | 1 | 1 SNORA15     | -- |
| ENSG00000251941 | 5.13E-15 | -2.63127 | 1 | 1 RNA5SP116   | -- |
| ENSG00000251942 | 5.13E-15 | -2.63127 | 1 | 1 SCARNA16    | -- |
| ENSG00000251943 | 5.13E-15 | -2.63127 | 1 | 1 RNU6-693P   | -- |
| ENSG00000251944 | 5.13E-15 | -2.63127 | 1 | 1 U3          | -- |
| ENSG00000251946 | 5.13E-15 | -2.63127 | 1 | 1 RNU6-1023P  | -- |
| ENSG00000251947 | 5.13E-15 | -2.63127 | 1 | 1 RN7SKP164   | -- |
| ENSG00000251949 | 5.13E-15 | -2.63127 | 1 | 1 SNORD112    | -- |
| ENSG00000251950 | 5.13E-15 | -2.63127 | 1 | 1 RMRPP4      | -- |
| ENSG00000251951 | 5.13E-15 | -2.63127 | 1 | 1 RN7SKP34    | -- |
| ENSG00000251952 | 5.13E-15 | -2.63127 | 1 | 1 RNU6-1219P  | -- |
| ENSG00000251953 | 5.13E-15 | -2.63127 | 1 | 1 RNA5SP522   | -- |
| ENSG00000251954 | 5.13E-15 | -2.63127 | 1 | 1 RNU6-496P   | -- |
| ENSG00000251955 | 5.13E-15 | -2.63127 | 1 | 1 RNU6-27P    | -- |
| ENSG00000251956 | 5.13E-15 | -2.63127 | 1 | 1 RNU6-617P   | -- |
| ENSG00000251958 | 5.13E-15 | -2.63127 | 1 | 1 RNU6-1102P  | -- |
| ENSG00000251959 | 5.13E-15 | -2.63127 | 1 | 1 snoR442     | -- |
| ENSG00000251960 | 5.13E-15 | -2.63127 | 1 | 1 RNU6-559P   | -- |
| ENSG00000251961 | 5.13E-15 | -2.63127 | 1 | 1 RNU6ATAC13P | -- |
| ENSG00000251962 | 5.13E-15 | -2.63127 | 1 | 1 AL591668.1  | -- |
| ENSG00000251964 | 5.13E-15 | -2.63127 | 1 | 1 RNU7-135P   | -- |
| ENSG00000251965 | 5.13E-15 | -2.63127 | 1 | 1 RNA5SP208   | -- |
| ENSG00000251966 | 5.13E-15 | -2.63127 | 1 | 1 AC010970.1  | -- |
| ENSG00000251967 | 5.13E-15 | -2.63127 | 1 | 1 SNORD77     | -- |
| ENSG00000251968 | 5.13E-15 | -2.63127 | 1 | 1 AL133376.1  | -- |
| ENSG00000251970 | 5.13E-15 | -2.63127 | 1 | 1 RNU1-41P    | -- |
| ENSG00000251971 | 5.13E-15 | -2.63127 | 1 | 1 RNU6-1333P  | -- |
| ENSG00000251972 | 5.13E-15 | -2.63127 | 1 | 1 RNU6-123P   | -- |
| ENSG00000251973 | 5.13E-15 | -2.63127 | 1 | 1 RNU6-473P   | -- |
| ENSG00000251974 | 5.13E-15 | -2.63127 | 1 | 1 SNORA19     | -- |
| ENSG00000251975 | 5.13E-15 | -2.63127 | 1 | 1 RNU6-718P   | -- |
| ENSG00000251976 | 5.13E-15 | -2.63127 | 1 | 1 RN7SKP141   | -- |
| ENSG00000251977 | 5.13E-15 | -2.63127 | 1 | 1 RNU6-991P   | -- |
| ENSG00000251978 | 5.13E-15 | -2.63127 | 1 | 1 RNA5SP236   | -- |
| ENSG00000251979 | 5.13E-15 | -2.63127 | 1 | 1 U3          | -- |
| ENSG00000251980 | 5.13E-15 | -2.63127 | 1 | 1 RNU6-436P   | -- |

|                 |          |          |   |               |    |
|-----------------|----------|----------|---|---------------|----|
| ENSG00000251981 | 5.13E-15 | -2.63127 | 1 | 1 RNU7-52P    | -- |
| ENSG00000251982 | 5.13E-15 | -2.63127 | 1 | 1 RN7SKP43    | -- |
| ENSG00000251983 | 5.13E-15 | -2.63127 | 1 | 1 RN7SKP157   | -- |
| ENSG00000251986 | 5.13E-15 | -2.63127 | 1 | 1 Y_RNA       | -- |
| ENSG00000251987 | 5.13E-15 | -2.63127 | 1 | 1 SNORD63     | -- |
| ENSG00000251989 | 5.13E-15 | -2.63127 | 1 | 1 AL160011.1  | -- |
| ENSG00000251993 | 5.13E-15 | -2.63127 | 1 | 1 RNA5SP227   | -- |
| ENSG00000251995 | 5.13E-15 | -2.63127 | 1 | 1 Y_RNA       | -- |
| ENSG00000251996 | 5.13E-15 | -2.63127 | 1 | 1 Y_RNA       | -- |
| ENSG00000251997 | 5.13E-15 | -2.63127 | 1 | 1 RNA5SP458   | -- |
| ENSG00000251998 | 5.13E-15 | -2.63127 | 1 | 1 RNU6-168P   | -- |
| ENSG00000251999 | 5.13E-15 | -2.63127 | 1 | 1 SNORA31     | -- |
| ENSG00000252000 | 5.13E-15 | -2.63127 | 1 | 1 ACA59       | -- |
| ENSG00000252001 | 5.13E-15 | -2.63127 | 1 | 1 RNA5SP303   | -- |
| ENSG00000252002 | 5.13E-15 | -2.63127 | 1 | 1 RNA5SP154   | -- |
| ENSG00000252003 | 5.13E-15 | -2.63127 | 1 | 1 RNU7-154P   | -- |
| ENSG00000252004 | 5.13E-15 | -2.63127 | 1 | 1 AC068718.1  | -- |
| ENSG00000252005 | 5.13E-15 | -2.63127 | 1 | 1 RNU4ATAC8P  | -- |
| ENSG00000252008 | 5.13E-15 | -2.63127 | 1 | 1 RNU6-927P   | -- |
| ENSG00000252009 | 5.13E-15 | -2.63127 | 1 | 1 SNORD112    | -- |
| ENSG00000252011 | 5.13E-15 | -2.63127 | 1 | 1 SNORA25     | -- |
| ENSG00000252012 | 5.13E-15 | -2.63127 | 1 | 1 RNA5SP521   | -- |
| ENSG00000252013 | 5.13E-15 | -2.63127 | 1 | 1 RNU4ATAC14P | -- |
| ENSG00000252014 | 5.13E-15 | -2.63127 | 1 | 1 SNORA70     | -- |
| ENSG00000252015 | 5.13E-15 | -2.63127 | 1 | 1 RNU6-904P   | -- |
| ENSG00000252016 | 5.13E-15 | -2.63127 | 1 | 1 ACA64       | -- |
| ENSG00000252017 | 5.13E-15 | -2.63127 | 1 | 1 RNU6-1194P  | -- |
| ENSG00000252018 | 5.13E-15 | -2.63127 | 1 | 1 RNU2-30P    | -- |
| ENSG00000252019 | 5.13E-15 | -2.63127 | 1 | 1 RNU6ATAC9P  | -- |
| ENSG00000252020 | 5.13E-15 | -2.63127 | 1 | 1 SCARNA17    | -- |
| ENSG00000252022 | 5.13E-15 | -2.63127 | 1 | 1 SNORD33     | -- |
| ENSG00000252023 | 5.13E-15 | -2.63127 | 1 | 1 RNU6-581P   | -- |
| ENSG00000252024 | 5.13E-15 | -2.63127 | 1 | 1 SCARNA18    | -- |
| ENSG00000252025 | 5.13E-15 | -2.63127 | 1 | 1 RNU6-982P   | -- |
| ENSG00000252026 | 5.13E-15 | -2.63127 | 1 | 1 RNU6-1262P  | -- |
| ENSG00000252027 | 5.13E-15 | -2.63127 | 1 | 1 RNU6ATAC14P | -- |
| ENSG00000252028 | 5.13E-15 | -2.63127 | 1 | 1 RN7SKP52    | -- |
| ENSG00000252029 | 5.13E-15 | -2.63127 | 1 | 1 RNA5SP253   | -- |
| ENSG00000252030 | 5.13E-15 | -2.63127 | 1 | 1 RNU6-1196P  | -- |
| ENSG00000252031 | 5.13E-15 | -2.63127 | 1 | 1 RNU6-561P   | -- |
| ENSG00000252032 | 5.13E-15 | -2.63127 | 1 | 1 RNU6-1281P  | -- |
| ENSG00000252033 | 5.13E-15 | -2.63127 | 1 | 1 RNU6-311P   | -- |
| ENSG00000252034 | 5.13E-15 | -2.63127 | 1 | 1 Y_RNA       | -- |
| ENSG00000252035 | 5.13E-15 | -2.63127 | 1 | 1 RNU6-397P   | -- |
| ENSG00000252036 | 5.13E-15 | -2.63127 | 1 | 1 RN7SKP288   | -- |
| ENSG00000252037 | 5.13E-15 | -2.63127 | 1 | 1 RNU6-162P   | -- |
| ENSG00000252038 | 5.13E-15 | -2.63127 | 1 | 1 AC068704.1  | -- |
| ENSG00000252039 | 5.13E-15 | -2.63127 | 1 | 1 RNU6-287P   | -- |
| ENSG00000252040 | 5.13E-15 | -2.63127 | 1 | 1 snoU109     | -- |
| ENSG00000252041 | 5.13E-15 | -2.63127 | 1 | 1 RNA5SP228   | -- |
| ENSG00000252042 | 5.13E-15 | -2.63127 | 1 | 1 Y_RNA       | -- |
| ENSG00000252045 | 5.13E-15 | -2.63127 | 1 | 1 SNORA33     | -- |
| ENSG00000252046 | 5.13E-15 | -2.63127 | 1 | 1 RNU6-150P   | -- |
| ENSG00000252047 | 5.13E-15 | -2.63127 | 1 | 1 Y_RNA       | -- |
| ENSG00000252048 | 5.13E-15 | -2.63127 | 1 | 1 U3          | -- |
| ENSG00000252049 | 5.13E-15 | -2.63127 | 1 | 1 SNORA40     | -- |
| ENSG00000252050 | 5.13E-15 | -2.63127 | 1 | 1 SNORA31     | -- |
| ENSG00000252051 | 5.13E-15 | -2.63127 | 1 | 1 RN7SKP276   | -- |

|                 |          |          |   |              |    |
|-----------------|----------|----------|---|--------------|----|
| ENSG00000252053 | 5.13E-15 | -2.63127 | 1 | 1 RNU6-1101P | -- |
| ENSG00000252054 | 5.13E-15 | -2.63127 | 1 | 1 SNORA73    | -- |
| ENSG00000252055 | 5.13E-15 | -2.63127 | 1 | 1 RNU6-69P   | -- |
| ENSG00000252056 | 5.13E-15 | -2.63127 | 1 | 1 RNU5E-2P   | -- |
| ENSG00000252057 | 5.13E-15 | -2.63127 | 1 | 1 RNU7-174P  | -- |
| ENSG00000252058 | 5.13E-15 | -2.63127 | 1 | 1 snoU13     | -- |
| ENSG00000252059 | 5.13E-15 | -2.63127 | 1 | 1 AC012667.1 | -- |
| ENSG00000252060 | 5.13E-15 | -2.63127 | 1 | 1 RNA5SP464  | -- |
| ENSG00000252062 | 5.13E-15 | -2.63127 | 1 | 1 RNU6-469P  | -- |
| ENSG00000252063 | 5.13E-15 | -2.63127 | 1 | 1 RNU6-1041P | -- |
| ENSG00000252064 | 5.13E-15 | -2.63127 | 1 | 1 Y_RNA      | -- |
| ENSG00000252065 | 5.13E-15 | -2.63127 | 1 | 1 RNU6-864P  | -- |
| ENSG00000252066 | 5.13E-15 | -2.63127 | 1 | 1 RNU2-53P   | -- |
| ENSG00000252067 | 5.13E-15 | -2.63127 | 1 | 1 RNU4-71P   | -- |
| ENSG00000252068 | 5.13E-15 | -2.63127 | 1 | 1 RNU6-390P  | -- |
| ENSG00000252069 | 5.13E-15 | -2.63127 | 1 | 1 Y_RNA      | -- |
| ENSG00000252072 | 5.13E-15 | -2.63127 | 1 | 1 RNA5SP320  | -- |
| ENSG00000252073 | 5.13E-15 | -2.63127 | 1 | 1 RNU6-947P  | -- |
| ENSG00000252074 | 5.13E-15 | -2.63127 | 1 | 1 RNU6-416P  | -- |
| ENSG00000252076 | 5.13E-15 | -2.63127 | 1 | 1 RN7SKP196  | -- |
| ENSG00000252077 | 5.13E-15 | -2.63127 | 1 | 1 SNORD112   | -- |
| ENSG00000252078 | 5.13E-15 | -2.63127 | 1 | 1 SNORD112   | -- |
| ENSG00000252079 | 5.13E-15 | -2.63127 | 1 | 1 RNU6-327P  | -- |
| ENSG00000252080 | 5.13E-15 | -2.63127 | 1 | 1 RNU7-99P   | -- |
| ENSG00000252081 | 5.13E-15 | -2.63127 | 1 | 1 RNU6-277P  | -- |
| ENSG00000252082 | 5.13E-15 | -2.63127 | 1 | 1 RNU6-547P  | -- |
| ENSG00000252083 | 5.13E-15 | -2.63127 | 1 | 1 SNORA40    | -- |
| ENSG00000252084 | 5.13E-15 | -2.63127 | 1 | 1 RN7SKP12   | -- |
| ENSG00000252085 | 5.13E-15 | -2.63127 | 1 | 1 Y_RNA      | -- |
| ENSG00000252086 | 5.13E-15 | -2.63127 | 1 | 1 RNA5SP76   | -- |
| ENSG00000252087 | 5.13E-15 | -2.63127 | 1 | 1 RN7SKP248  | -- |
| ENSG00000252088 | 5.13E-15 | -2.63127 | 1 | 1 snoU13     | -- |
| ENSG00000252089 | 5.13E-15 | -2.63127 | 1 | 1 RNU4ATAC7P | -- |
| ENSG00000252091 | 5.13E-15 | -2.63127 | 1 | 1 RNU6-1146P | -- |
| ENSG00000252092 | 5.13E-15 | -2.63127 | 1 | 1 AC098830.1 | -- |
| ENSG00000252093 | 5.13E-15 | -2.63127 | 1 | 1 AC011626.1 | -- |
| ENSG00000252094 | 5.13E-15 | -2.63127 | 1 | 1 RNA5SP410  | -- |
| ENSG00000252096 | 5.13E-15 | -2.63127 | 1 | 1 SNORA31    | -- |
| ENSG00000252097 | 5.13E-15 | -2.63127 | 1 | 1 RNU6-346P  | -- |
| ENSG00000252098 | 5.13E-15 | -2.63127 | 1 | 1 Y_RNA      | -- |
| ENSG00000252100 | 5.13E-15 | -2.63127 | 1 | 1 AC002539.2 | -- |
| ENSG00000252101 | 5.13E-15 | -2.63127 | 1 | 1 RNU6-758P  | -- |
| ENSG00000252102 | 5.13E-15 | -2.63127 | 1 | 1 SNORA63    | -- |
| ENSG00000252103 | 5.13E-15 | -2.63127 | 1 | 1 RNU6-917P  | -- |
| ENSG00000252104 | 5.13E-15 | -2.63127 | 1 | 1 RNU6-191P  | -- |
| ENSG00000252105 | 5.13E-15 | -2.63127 | 1 | 1 RNU1-143P  | -- |
| ENSG00000252107 | 5.13E-15 | -2.63127 | 1 | 1 RNA5SP220  | -- |
| ENSG00000252108 | 5.13E-15 | -2.63127 | 1 | 1 RNU6-1232P | -- |
| ENSG00000252109 | 5.13E-15 | -2.63127 | 1 | 1 snoZ178    | -- |
| ENSG00000252110 | 5.13E-15 | -2.63127 | 1 | 1 snoU13     | -- |
| ENSG00000252111 | 5.13E-15 | -2.63127 | 1 | 1 AC002981.1 | -- |
| ENSG00000252112 | 5.13E-15 | -2.63127 | 1 | 1 SNORD63    | -- |
| ENSG00000252113 | 5.13E-15 | -2.63127 | 1 | 1 RNU6-523P  | -- |
| ENSG00000252114 | 5.13E-15 | -2.63127 | 1 | 1 SNORA73    | -- |
| ENSG00000252115 | 5.13E-15 | -2.63127 | 1 | 1 Y_RNA      | -- |
| ENSG00000252116 | 5.13E-15 | -2.63127 | 1 | 1 RNU4ATAC4P | -- |
| ENSG00000252117 | 5.13E-15 | -2.63127 | 1 | 1 RNU6-1108P | -- |
| ENSG00000252119 | 5.13E-15 | -2.63127 | 1 | 1 ACA64      | -- |

|                 |          |          |   |              |    |
|-----------------|----------|----------|---|--------------|----|
| ENSG00000252120 | 5.13E-15 | -2.63127 | 1 | 1 AL136137.1 | -- |
| ENSG00000252121 | 5.13E-15 | -2.63127 | 1 | 1 RNU6-970P  | -- |
| ENSG00000252122 | 5.13E-15 | -2.63127 | 1 | 1 SNORA76    | -- |
| ENSG00000252123 | 5.13E-15 | -2.63127 | 1 | 1 RNU7-72P   | -- |
| ENSG00000252124 | 5.13E-15 | -2.63127 | 1 | 1 AL031594.1 | -- |
| ENSG00000252125 | 5.13E-15 | -2.63127 | 1 | 1 RNU6-1299P | -- |
| ENSG00000252126 | 5.13E-15 | -2.63127 | 1 | 1 RNU6-313P  | -- |
| ENSG00000252128 | 5.13E-15 | -2.63127 | 1 | 1 SNORD27    | -- |
| ENSG00000252129 | 5.13E-15 | -2.63127 | 1 | 1 SNORA74    | -- |
| ENSG00000252130 | 5.13E-15 | -2.63127 | 1 | 1 RNU6-1045P | -- |
| ENSG00000252131 | 5.13E-15 | -2.63127 | 1 | 1 AL844165.1 | -- |
| ENSG00000252132 | 5.13E-15 | -2.63127 | 1 | 1 RNU6-795P  | -- |
| ENSG00000252133 | 5.13E-15 | -2.63127 | 1 | 1 SNORA70    | -- |
| ENSG00000252134 | 5.13E-15 | -2.63127 | 1 | 1 Y_RNA      | -- |
| ENSG00000252135 | 5.13E-15 | -2.63127 | 1 | 1 RNVU1-2    | -- |
| ENSG00000252136 | 5.13E-15 | -2.63127 | 1 | 1 SNORA31    | -- |
| ENSG00000252137 | 5.13E-15 | -2.63127 | 1 | 1 RNU6-1338P | -- |
| ENSG00000252138 | 5.13E-15 | -2.63127 | 1 | 1 SNORA40    | -- |
| ENSG00000252139 | 5.13E-15 | -2.63127 | 1 | 1 SCARNA18   | -- |
| ENSG00000252141 | 5.13E-15 | -2.63127 | 1 | 1 RNU6-65P   | -- |
| ENSG00000252142 | 5.13E-15 | -2.63127 | 1 | 1 AL022314.1 | -- |
| ENSG00000252143 | 5.13E-15 | -2.63127 | 1 | 1 SCARNA17   | -- |
| ENSG00000252144 | 5.13E-15 | -2.63127 | 1 | 1 SNORD112   | -- |
| ENSG00000252145 | 5.13E-15 | -2.63127 | 1 | 1 RNU6-1225P | -- |
| ENSG00000252146 | 5.13E-15 | -2.63127 | 1 | 1 AL390776.1 | -- |
| ENSG00000252148 | 5.13E-15 | -2.63127 | 1 | 1 RNU6-1206P | -- |
| ENSG00000252149 | 5.13E-15 | -2.63127 | 1 | 1 RNA5SP315  | -- |
| ENSG00000252150 | 5.13E-15 | -2.63127 | 1 | 1 AC092574.2 | -- |
| ENSG00000252151 | 5.13E-15 | -2.63127 | 1 | 1 RNU6-1265P | -- |
| ENSG00000252153 | 5.13E-15 | -2.63127 | 1 | 1 MIR2278    | -- |
| ENSG00000252154 | 5.13E-15 | -2.63127 | 1 | 1 SNORD112   | -- |
| ENSG00000252155 | 5.13E-15 | -2.63127 | 1 | 1 RNU6-941P  | -- |
| ENSG00000252156 | 5.13E-15 | -2.63127 | 1 | 1 RNU6-155P  | -- |
| ENSG00000252158 | 5.13E-15 | -2.63127 | 1 | 1 SNORA72    | -- |
| ENSG00000252159 | 5.13E-15 | -2.63127 | 1 | 1 RNY4P1     | -- |
| ENSG00000252161 | 5.13E-15 | -2.63127 | 1 | 1 RNA5SP318  | -- |
| ENSG00000252162 | 5.13E-15 | -2.63127 | 1 | 1 RNU6-830P  | -- |
| ENSG00000252163 | 5.13E-15 | -2.63127 | 1 | 1 RN7SKP31   | -- |
| ENSG00000252164 | 5.13E-15 | -2.63127 | 1 | 1 RNA5SP282  | -- |
| ENSG00000252166 | 5.13E-15 | -2.63127 | 1 | 1 RNU1-95P   | -- |
| ENSG00000252167 | 5.13E-15 | -2.63127 | 1 | 1 RNA5SP287  | -- |
| ENSG00000252169 | 5.13E-15 | -2.63127 | 1 | 1 RNA5SP200  | -- |
| ENSG00000252170 | 5.13E-15 | -2.63127 | 1 | 1 SNORD112   | -- |
| ENSG00000252171 | 5.13E-15 | -2.63127 | 1 | 1 Y_RNA      | -- |
| ENSG00000252172 | 5.13E-15 | -2.63127 | 1 | 1 RNU6-720P  | -- |
| ENSG00000252173 | 5.13E-15 | -2.63127 | 1 | 1 RNU6-109P  | -- |
| ENSG00000252175 | 5.13E-15 | -2.63127 | 1 | 1 U3         | -- |
| ENSG00000252176 | 5.13E-15 | -2.63127 | 1 | 1 AC123767.1 | -- |
| ENSG00000252177 | 5.13E-15 | -2.63127 | 1 | 1 AC005513.1 | -- |
| ENSG00000252178 | 5.13E-15 | -2.63127 | 1 | 1 RNU7-69P   | -- |
| ENSG00000252179 | 5.13E-15 | -2.63127 | 1 | 1 RNA5SP255  | -- |
| ENSG00000252180 | 5.13E-15 | -2.63127 | 1 | 1 Y_RNA      | -- |
| ENSG00000252181 | 5.13E-15 | -2.63127 | 1 | 1 AC020703.1 | -- |
| ENSG00000252182 | 5.13E-15 | -2.63127 | 1 | 1 RNA5SP413  | -- |
| ENSG00000252183 | 5.13E-15 | -2.63127 | 1 | 1 RNU6-948P  | -- |
| ENSG00000252184 | 5.13E-15 | -2.63127 | 1 | 1 RNU2-10P   | -- |
| ENSG00000252185 | 5.13E-15 | -2.63127 | 1 | 1 RNU6-752P  | -- |
| ENSG00000252186 | 5.13E-15 | -2.63127 | 1 | 1 RNU6-781P  | -- |

|                 |          |          |   |                |    |
|-----------------|----------|----------|---|----------------|----|
| ENSG00000252187 | 5.13E-15 | -2.63127 | 1 | 1 AC051649.1   | -- |
| ENSG00000252188 | 5.13E-15 | -2.63127 | 1 | 1 SNORA40      | -- |
| ENSG00000252189 | 5.13E-15 | -2.63127 | 1 | 1 U3           | -- |
| ENSG00000252190 | 5.13E-15 | -2.63127 | 1 | 1 SCARNA17     | -- |
| ENSG00000252191 | 5.13E-15 | -2.63127 | 1 | 1 RNU6-751P    | -- |
| ENSG00000252193 | 5.13E-15 | -2.63127 | 1 | 1 SCARNA15     | -- |
| ENSG00000252198 | 5.13E-15 | -2.63127 | 1 | 1 Y_RNA        | -- |
| ENSG00000252199 | 5.13E-15 | -2.63127 | 1 | 1 SNORA70      | -- |
| ENSG00000252201 | 5.13E-15 | -2.63127 | 1 | 1 RNU6-1058P   | -- |
| ENSG00000252203 | 5.13E-15 | -2.63127 | 1 | 1 snoR442      | -- |
| ENSG00000252204 | 5.13E-15 | -2.63127 | 1 | 1 SNORA25      | -- |
| ENSG00000252205 | 5.13E-15 | -2.63127 | 1 | 1 RNU6-764P    | -- |
| ENSG00000252206 | 5.13E-15 | -2.63127 | 1 | 1 RNU7-40P     | -- |
| ENSG00000252207 | 5.13E-15 | -2.63127 | 1 | 1 RNA5SP365    | -- |
| ENSG00000252209 | 5.13E-15 | -2.63127 | 1 | 1 RNU1-48P     | -- |
| ENSG00000252210 | 5.13E-15 | -2.63127 | 1 | 1 Y_RNA        | -- |
| ENSG00000252211 | 5.13E-15 | -2.63127 | 1 | 1 RNA5SP473    | -- |
| ENSG00000252212 | 5.13E-15 | -2.63127 | 1 | 1 RNU2-58P     | -- |
| ENSG00000252214 | 5.13E-15 | -2.63127 | 1 | 1 RNU6-542P    | -- |
| ENSG00000252215 | 5.13E-15 | -2.63127 | 1 | 1 AL357514.1   | -- |
| ENSG00000252216 | 5.13E-15 | -2.63127 | 1 | 1 AC007041.1   | -- |
| ENSG00000252217 | 5.13E-15 | -2.63127 | 1 | 1 Y_RNA        | -- |
| ENSG00000252218 | 5.13E-15 | -2.63127 | 1 | 1 SCARNA15     | -- |
| ENSG00000252219 | 5.13E-15 | -2.63127 | 1 | 1 hsa-mir-892c | -- |
| ENSG00000252220 | 5.13E-15 | -2.63127 | 1 | 1 RNU6-977P    | -- |
| ENSG00000252222 | 5.13E-15 | -2.63127 | 1 | 1 RNU7-13P     | -- |
| ENSG00000252223 | 5.13E-15 | -2.63127 | 1 | 1 RNU6-1049P   | -- |
| ENSG00000252224 | 5.13E-15 | -2.63127 | 1 | 1 RNU4ATAC15P  | -- |
| ENSG00000252225 | 5.13E-15 | -2.63127 | 1 | 1 Y_RNA        | -- |
| ENSG00000252226 | 5.13E-15 | -2.63127 | 1 | 1 AL451051.1   | -- |
| ENSG00000252227 | 5.13E-15 | -2.63127 | 1 | 1 SNORD36      | -- |
| ENSG00000252228 | 5.13E-15 | -2.63127 | 1 | 1 SNORA48      | -- |
| ENSG00000252230 | 5.13E-15 | -2.63127 | 1 | 1 SNORD111     | -- |
| ENSG00000252231 | 5.13E-15 | -2.63127 | 1 | 1 RNA5SP67     | -- |
| ENSG00000252233 | 5.13E-15 | -2.63127 | 1 | 1 RN7SKP253    | -- |
| ENSG00000252235 | 5.13E-15 | -2.63127 | 1 | 1 RNU6-962P    | -- |
| ENSG00000252236 | 5.13E-15 | -2.63127 | 1 | 1 SNORA26      | -- |
| ENSG00000252237 | 5.13E-15 | -2.63127 | 1 | 1 RNU4-54P     | -- |
| ENSG00000252238 | 5.13E-15 | -2.63127 | 1 | 1 SNORA31      | -- |
| ENSG00000252239 | 5.13E-15 | -2.63127 | 1 | 1 RNU6-1185P   | -- |
| ENSG00000252240 | 5.13E-15 | -2.63127 | 1 | 1 AC096643.1   | -- |
| ENSG00000252242 | 5.13E-15 | -2.63127 | 1 | 1 RNU7-115P    | -- |
| ENSG00000252243 | 5.13E-15 | -2.63127 | 1 | 1 RNU6-412P    | -- |
| ENSG00000252244 | 5.13E-15 | -2.63127 | 1 | 1 RNU7-3P      | -- |
| ENSG00000252246 | 5.13E-15 | -2.63127 | 1 | 1 RNA5SP92     | -- |
| ENSG00000252247 | 5.13E-15 | -2.63127 | 1 | 1 RNU6-70P     | -- |
| ENSG00000252249 | 5.13E-15 | -2.63127 | 1 | 1 SNORA18      | -- |
| ENSG00000252250 | 5.13E-15 | -2.63127 | 1 | 1 Y_RNA        | -- |
| ENSG00000252251 | 5.13E-15 | -2.63127 | 1 | 1 RNA5SP348    | -- |
| ENSG00000252252 | 5.13E-15 | -2.63127 | 1 | 1 RNU6-687P    | -- |
| ENSG00000252254 | 5.13E-15 | -2.63127 | 1 | 1 Y_RNA        | -- |
| ENSG00000252255 | 5.13E-15 | -2.63127 | 1 | 1 RNU2-35P     | -- |
| ENSG00000252256 | 5.13E-15 | -2.63127 | 1 | 1 SNORD112     | -- |
| ENSG00000252257 | 5.13E-15 | -2.63127 | 1 | 1 RN7SKP265    | -- |
| ENSG00000252258 | 5.13E-15 | -2.63127 | 1 | 1 SNORA70      | -- |
| ENSG00000252259 | 5.13E-15 | -2.63127 | 1 | 1 RNA5SP49     | -- |
| ENSG00000252260 | 5.13E-15 | -2.63127 | 1 | 1 RNA5SP461    | -- |
| ENSG00000252261 | 5.13E-15 | -2.63127 | 1 | 1 RNA5SP262    | -- |

|                 |          |          |   |               |    |
|-----------------|----------|----------|---|---------------|----|
| ENSG00000252262 | 5.13E-15 | -2.63127 | 1 | 1 RNA5SP61    | -- |
| ENSG00000252263 | 5.13E-15 | -2.63127 | 1 | 1 RNU6-659P   | -- |
| ENSG00000252264 | 5.13E-15 | -2.63127 | 1 | 1 RNU7-153P   | -- |
| ENSG00000252265 | 5.13E-15 | -2.63127 | 1 | 1 snoU13      | -- |
| ENSG00000252266 | 5.13E-15 | -2.63127 | 1 | 1 Y_RNA       | -- |
| ENSG00000252267 | 5.13E-15 | -2.63127 | 1 | 1 RNA5SP495   | -- |
| ENSG00000252268 | 5.13E-15 | -2.63127 | 1 | 1 RNA5SP417   | -- |
| ENSG00000252269 | 5.13E-15 | -2.63127 | 1 | 1 RNU4ATAC12P | -- |
| ENSG00000252270 | 5.13E-15 | -2.63127 | 1 | 1 AC034205.1  | -- |
| ENSG00000252271 | 5.13E-15 | -2.63127 | 1 | 1 RNU6-1110P  | -- |
| ENSG00000252272 | 5.13E-15 | -2.63127 | 1 | 1 RNA5SP470   | -- |
| ENSG00000252273 | 5.13E-15 | -2.63127 | 1 | 1 RNU6-426P   | -- |
| ENSG00000252274 | 5.13E-15 | -2.63127 | 1 | 1 SCARNA24    | -- |
| ENSG00000252275 | 5.13E-15 | -2.63127 | 1 | 1 RNU7-192P   | -- |
| ENSG00000252277 | 5.13E-15 | -2.63127 | 1 | 1 SNORD116-30 | -- |
| ENSG00000252278 | 5.13E-15 | -2.63127 | 1 | 1 RNU6-866P   | -- |
| ENSG00000252279 | 5.13E-15 | -2.63127 | 1 | 1 RNU6-406P   | -- |
| ENSG00000252280 | 5.13E-15 | -2.63127 | 1 | 1 RNU7-16P    | -- |
| ENSG00000252281 | 5.13E-15 | -2.63127 | 1 | 1 snoZ247     | -- |
| ENSG00000252282 | 5.13E-15 | -2.63127 | 1 | 1 RNU6-1089P  | -- |
| ENSG00000252283 | 5.13E-15 | -2.63127 | 1 | 1 Vault       | -- |
| ENSG00000252284 | 5.13E-15 | -2.63127 | 1 | 1 SNORD28     | -- |
| ENSG00000252285 | 5.13E-15 | -2.63127 | 1 | 1 RNU7-5P     | -- |
| ENSG00000252287 | 5.13E-15 | -2.63127 | 1 | 1 RNA5SP24    | -- |
| ENSG00000252288 | 5.13E-15 | -2.63127 | 1 | 1 RNU6-966P   | -- |
| ENSG00000252289 | 5.13E-15 | -2.63127 | 1 | 1 RNA5SP519   | -- |
| ENSG00000252290 | 5.13E-15 | -2.63127 | 1 | 1 SNORA25     | -- |
| ENSG00000252291 | 5.13E-15 | -2.63127 | 1 | 1 SNORA31     | -- |
| ENSG00000252292 | 5.13E-15 | -2.63127 | 1 | 1 RN7SKP238   | -- |
| ENSG00000252293 | 5.13E-15 | -2.63127 | 1 | 1 RNU7-64P    | -- |
| ENSG00000252294 | 5.13E-15 | -2.63127 | 1 | 1 RNU6-589P   | -- |
| ENSG00000252295 | 5.13E-15 | -2.63127 | 1 | 1 snoU13      | -- |
| ENSG00000252296 | 5.13E-15 | -2.63127 | 1 | 1 SNORA25     | -- |
| ENSG00000252297 | 5.13E-15 | -2.63127 | 1 | 1 RNU6-875P   | -- |
| ENSG00000252298 | 5.13E-15 | -2.63127 | 1 | 1 SNORD112    | -- |
| ENSG00000252299 | 5.13E-15 | -2.63127 | 1 | 1 U3          | -- |
| ENSG00000252300 | 5.13E-15 | -2.63127 | 1 | 1 SNORD112    | -- |
| ENSG00000252301 | 5.13E-15 | -2.63127 | 1 | 1 RNA5SP134   | -- |
| ENSG00000252302 | 5.13E-15 | -2.63127 | 1 | 1 RNA5SP147   | -- |
| ENSG00000252303 | 5.13E-15 | -2.63127 | 1 | 1 RNU6-1221P  | -- |
| ENSG00000252305 | 5.13E-15 | -2.63127 | 1 | 1 SNORA74     | -- |
| ENSG00000252306 | 5.13E-15 | -2.63127 | 1 | 1 AC104183.1  | -- |
| ENSG00000252307 | 5.13E-15 | -2.63127 | 1 | 1 RNA5SP153   | -- |
| ENSG00000252308 | 5.13E-15 | -2.63127 | 1 | 1 AC011738.1  | -- |
| ENSG00000252309 | 5.13E-15 | -2.63127 | 1 | 1 AL391416.1  | -- |
| ENSG00000252310 | 5.13E-15 | -2.63127 | 1 | 1 RNY5        | -- |
| ENSG00000252312 | 5.13E-15 | -2.63127 | 1 | 1 RN7SKP21    | -- |
| ENSG00000252313 | 5.13E-15 | -2.63127 | 1 | 1 RNA5SP281   | -- |
| ENSG00000252314 | 5.13E-15 | -2.63127 | 1 | 1 SCARNA18    | -- |
| ENSG00000252315 | 5.13E-15 | -2.63127 | 1 | 1 RNA5SP520   | -- |
| ENSG00000252316 | 5.13E-15 | -2.63127 | 1 | 1 RNY4        | -- |
| ENSG00000252317 | 5.13E-15 | -2.63127 | 1 | 1 Y_RNA       | -- |
| ENSG00000252319 | 5.13E-15 | -2.63127 | 1 | 1 Y_RNA       | -- |
| ENSG00000252320 | 5.13E-15 | -2.63127 | 1 | 1 RNU6-320P   | -- |
| ENSG00000252321 | 5.13E-15 | -2.63127 | 1 | 1 RN7SKP83    | -- |
| ENSG00000252322 | 5.13E-15 | -2.63127 | 1 | 1 RN7SKP244   | -- |
| ENSG00000252323 | 5.13E-15 | -2.63127 | 1 | 1 RNU6-184P   | -- |
| ENSG00000252324 | 5.13E-15 | -2.63127 | 1 | 1 AL163193.1  | -- |

|                 |          |          |   |               |    |
|-----------------|----------|----------|---|---------------|----|
| ENSG00000252325 | 5.13E-15 | -2.63127 | 1 | 1 RNU6-1038P  | -- |
| ENSG00000252326 | 5.13E-15 | -2.63127 | 1 | 1 SNORD116-25 | -- |
| ENSG00000252327 | 5.13E-15 | -2.63127 | 1 | 1 RNU6-1302P  | -- |
| ENSG00000252328 | 5.13E-15 | -2.63127 | 1 | 1 Vault       | -- |
| ENSG00000252329 | 5.13E-15 | -2.63127 | 1 | 1 SCARNA16    | -- |
| ENSG00000252330 | 5.13E-15 | -2.63127 | 1 | 1 AC105105.1  | -- |
| ENSG00000252332 | 5.13E-15 | -2.63127 | 1 | 1 RNU6-911P   | -- |
| ENSG00000252333 | 5.13E-15 | -2.63127 | 1 | 1 RNU6-964P   | -- |
| ENSG00000252335 | 5.13E-15 | -2.63127 | 1 | 1 RNU6-62P    | -- |
| ENSG00000252336 | 5.13E-15 | -2.63127 | 1 | 1 RNA5SP148   | -- |
| ENSG00000252337 | 5.13E-15 | -2.63127 | 1 | 1 SNORA31     | -- |
| ENSG00000252338 | 5.13E-15 | -2.63127 | 1 | 1 RNU6-503P   | -- |
| ENSG00000252339 | 5.13E-15 | -2.63127 | 1 | 1 RNU6-1061P  | -- |
| ENSG00000252341 | 5.13E-15 | -2.63127 | 1 | 1 Y_RNA       | -- |
| ENSG00000252342 | 5.13E-15 | -2.63127 | 1 | 1 RNA5SP164   | -- |
| ENSG00000252343 | 5.13E-15 | -2.63127 | 1 | 1 RNU2-34P    | -- |
| ENSG00000252346 | 5.13E-15 | -2.63127 | 1 | 1 RNA5SP121   | -- |
| ENSG00000252347 | 5.13E-15 | -2.63127 | 1 | 1 RNU6-1046P  | -- |
| ENSG00000252348 | 5.13E-15 | -2.63127 | 1 | 1 RNU6-1256P  | -- |
| ENSG00000252349 | 5.13E-15 | -2.63127 | 1 | 1 SNORA31     | -- |
| ENSG00000252350 | 5.13E-15 | -2.63127 | 1 | 1 RPPH1-3P    | -- |
| ENSG00000252351 | 5.13E-15 | -2.63127 | 1 | 1 RNU6ATAC12P | -- |
| ENSG00000252352 | 5.13E-15 | -2.63127 | 1 | 1 SNORA40     | -- |
| ENSG00000252353 | 5.13E-15 | -2.63127 | 1 | 1 RNU7-25P    | -- |
| ENSG00000252354 | 5.13E-15 | -2.63127 | 1 | 1 SNORD112    | -- |
| ENSG00000252356 | 5.13E-15 | -2.63127 | 1 | 1 SNORD112    | -- |
| ENSG00000252357 | 5.13E-15 | -2.63127 | 1 | 1 Y_RNA       | -- |
| ENSG00000252358 | 5.13E-15 | -2.63127 | 1 | 1 RN7SKP135   | -- |
| ENSG00000252359 | 5.13E-15 | -2.63127 | 1 | 1 SNORD112    | -- |
| ENSG00000252362 | 5.13E-15 | -2.63127 | 1 | 1 RNU6-506P   | -- |
| ENSG00000252363 | 5.13E-15 | -2.63127 | 1 | 1 RNU7-43P    | -- |
| ENSG00000252364 | 5.13E-15 | -2.63127 | 1 | 1 RNA5SP360   | -- |
| ENSG00000252365 | 5.13E-15 | -2.63127 | 1 | 1 SNORD22     | -- |
| ENSG00000252366 | 5.13E-15 | -2.63127 | 1 | 1 RNA5SP367   | -- |
| ENSG00000252367 | 5.13E-15 | -2.63127 | 1 | 1 Y_RNA       | -- |
| ENSG00000252368 | 5.13E-15 | -2.63127 | 1 | 1 RNA5SP43    | -- |
| ENSG00000252369 | 5.13E-15 | -2.63127 | 1 | 1 RNU7-51P    | -- |
| ENSG00000252370 | 5.13E-15 | -2.63127 | 1 | 1 RNA5SP438   | -- |
| ENSG00000252371 | 5.13E-15 | -2.63127 | 1 | 1 RNU6-725P   | -- |
| ENSG00000252372 | 5.13E-15 | -2.63127 | 1 | 1 SNORD112    | -- |
| ENSG00000252373 | 5.13E-15 | -2.63127 | 1 | 1 RNU6-358P   | -- |
| ENSG00000252374 | 5.13E-15 | -2.63127 | 1 | 1 Y_RNA       | -- |
| ENSG00000252375 | 5.13E-15 | -2.63127 | 1 | 1 AC099339.1  | -- |
| ENSG00000252376 | 5.13E-15 | -2.63127 | 1 | 1 RNA5SP395   | -- |
| ENSG00000252377 | 5.13E-15 | -2.63127 | 1 | 1 RNU6-504P   | -- |
| ENSG00000252378 | 5.13E-15 | -2.63127 | 1 | 1 AC004851.1  | -- |
| ENSG00000252379 | 5.13E-15 | -2.63127 | 1 | 1 RNU6-1002P  | -- |
| ENSG00000252380 | 5.13E-15 | -2.63127 | 1 | 1 SNORD112    | -- |
| ENSG00000252382 | 5.13E-15 | -2.63127 | 1 | 1 AC108865.1  | -- |
| ENSG00000252383 | 5.13E-15 | -2.63127 | 1 | 1 RNU6-314P   | -- |
| ENSG00000252385 | 5.13E-15 | -2.63127 | 1 | 1 RNU6-68P    | -- |
| ENSG00000252386 | 5.13E-15 | -2.63127 | 1 | 1 RNU6-1018P  | -- |
| ENSG00000252387 | 5.13E-15 | -2.63127 | 1 | 1 snoU13      | -- |
| ENSG00000252388 | 5.13E-15 | -2.63127 | 1 | 1 snoU13      | -- |
| ENSG00000252391 | 5.13E-15 | -2.63127 | 1 | 1 RNU6-638P   | -- |
| ENSG00000252393 | 5.13E-15 | -2.63127 | 1 | 1 RNU6-1004P  | -- |
| ENSG00000252394 | 5.13E-15 | -2.63127 | 1 | 1 RNU6-691P   | -- |
| ENSG00000252395 | 5.13E-15 | -2.63127 | 1 | 1 RNU6-1007P  | -- |

|                 |          |          |   |                   |    |
|-----------------|----------|----------|---|-------------------|----|
| ENSG00000252396 | 5.13E-15 | -2.63127 | 1 | 1 RN7SKP195       | -- |
| ENSG00000252397 | 5.13E-15 | -2.63127 | 1 | 1 RNU5A-4P        | -- |
| ENSG00000252398 | 5.13E-15 | -2.63127 | 1 | 1 Y_RNA           | -- |
| ENSG00000252399 | 5.13E-15 | -2.63127 | 1 | 1 RNU6-1259P      | -- |
| ENSG00000252400 | 5.13E-15 | -2.63127 | 1 | 1 RNU6-1291P      | -- |
| ENSG00000252401 | 5.13E-15 | -2.63127 | 1 | 1 RNU4ATAC6P      | -- |
| ENSG00000252402 | 5.13E-15 | -2.63127 | 1 | 1 snoU13          | -- |
| ENSG00000252403 | 5.13E-15 | -2.63127 | 1 | 1 RNY4P11         | -- |
| ENSG00000252404 | 5.13E-15 | -2.63127 | 1 | 1 SCARNA16        | -- |
| ENSG00000252405 | 5.13E-15 | -2.63127 | 1 | 1 snoMe28S-Am2634 | -- |
| ENSG00000252406 | 5.13E-15 | -2.63127 | 1 | 1 RNU7-36P        | -- |
| ENSG00000252407 | 5.13E-15 | -2.63127 | 1 | 1 RNU7-183P       | -- |
| ENSG00000252409 | 5.13E-15 | -2.63127 | 1 | 1 SCARNA21        | -- |
| ENSG00000252410 | 5.13E-15 | -2.63127 | 1 | 1 RNU5B-3P        | -- |
| ENSG00000252411 | 5.13E-15 | -2.63127 | 1 | 1 RNU6-1087P      | -- |
| ENSG00000252413 | 5.13E-15 | -2.63127 | 1 | 1 RNU7-121P       | -- |
| ENSG00000252415 | 5.13E-15 | -2.63127 | 1 | 1 RNU6-1012P      | -- |
| ENSG00000252416 | 5.13E-15 | -2.63127 | 1 | 1 RNU6-885P       | -- |
| ENSG00000252417 | 5.13E-15 | -2.63127 | 1 | 1 RNU7-179P       | -- |
| ENSG00000252418 | 5.13E-15 | -2.63127 | 1 | 1 RNU6-779P       | -- |
| ENSG00000252420 | 5.13E-15 | -2.63127 | 1 | 1 Y_RNA           | -- |
| ENSG00000252421 | 5.13E-15 | -2.63127 | 1 | 1 RNU6-1069P      | -- |
| ENSG00000252422 | 5.13E-15 | -2.63127 | 1 | 1 RNA5SP476       | -- |
| ENSG00000252423 | 5.13E-15 | -2.63127 | 1 | 1 RNU6-229P       | -- |
| ENSG00000252424 | 5.13E-15 | -2.63127 | 1 | 1 RNA5SP384       | -- |
| ENSG00000252425 | 5.13E-15 | -2.63127 | 1 | 1 SNORA18         | -- |
| ENSG00000252426 | 5.13E-15 | -2.63127 | 1 | 1 RNU1-107P       | -- |
| ENSG00000252427 | 5.13E-15 | -2.63127 | 1 | 1 SNORD67         | -- |
| ENSG00000252428 | 5.13E-15 | -2.63127 | 1 | 1 RNA5SP285       | -- |
| ENSG00000252429 | 5.13E-15 | -2.63127 | 1 | 1 RNU7-29P        | -- |
| ENSG00000252430 | 5.13E-15 | -2.63127 | 1 | 1 AL109750.1      | -- |
| ENSG00000252431 | 5.13E-15 | -2.63127 | 1 | 1 RNU6-1247P      | -- |
| ENSG00000252432 | 5.13E-15 | -2.63127 | 1 | 1 AP001032.1      | -- |
| ENSG00000252433 | 5.13E-15 | -2.63127 | 1 | 1 SNORA31         | -- |
| ENSG00000252434 | 5.13E-15 | -2.63127 | 1 | 1 SNORD112        | -- |
| ENSG00000252435 | 5.13E-15 | -2.63127 | 1 | 1 snoU13          | -- |
| ENSG00000252436 | 5.13E-15 | -2.63127 | 1 | 1 Y_RNA           | -- |
| ENSG00000252437 | 5.13E-15 | -2.63127 | 1 | 1 RNA5SP459       | -- |
| ENSG00000252438 | 5.13E-15 | -2.63127 | 1 | 1 SNORD45         | -- |
| ENSG00000252439 | 5.13E-15 | -2.63127 | 1 | 1 AC007241.1      | -- |
| ENSG00000252440 | 5.13E-15 | -2.63127 | 1 | 1 U3              | -- |
| ENSG00000252441 | 5.13E-15 | -2.63127 | 1 | 1 SNORA64         | -- |
| ENSG00000252442 | 5.13E-15 | -2.63127 | 1 | 1 RNY4P22         | -- |
| ENSG00000252443 | 5.13E-15 | -2.63127 | 1 | 1 SNORA62         | -- |
| ENSG00000252444 | 5.13E-15 | -2.63127 | 1 | 1 RNU6-344P       | -- |
| ENSG00000252445 | 5.13E-15 | -2.63127 | 1 | 1 AC007535.1      | -- |
| ENSG00000252446 | 5.13E-15 | -2.63127 | 1 | 1 RNU6-405P       | -- |
| ENSG00000252448 | 5.13E-15 | -2.63127 | 1 | 1 SNORA63         | -- |
| ENSG00000252449 | 5.13E-15 | -2.63127 | 1 | 1 RNU6-139P       | -- |
| ENSG00000252450 | 5.13E-15 | -2.63127 | 1 | 1 Y_RNA           | -- |
| ENSG00000252451 | 5.13E-15 | -2.63127 | 1 | 1 RNA5SP168       | -- |
| ENSG00000252452 | 5.13E-15 | -2.63127 | 1 | 1 RNU6-107P       | -- |
| ENSG00000252453 | 5.13E-15 | -2.63127 | 1 | 1 AC015971.1      | -- |
| ENSG00000252454 | 5.13E-15 | -2.63127 | 1 | 1 MIR2114         | -- |
| ENSG00000252455 | 5.13E-15 | -2.63127 | 1 | 1 AC007179.2      | -- |
| ENSG00000252456 | 5.13E-15 | -2.63127 | 1 | 1 RNA5SP434       | -- |
| ENSG00000252457 | 5.13E-15 | -2.63127 | 1 | 1 RNU7-65P        | -- |
| ENSG00000252458 | 5.13E-15 | -2.63127 | 1 | 1 SNORA68         | -- |



|                 |          |          |   |              |    |
|-----------------|----------|----------|---|--------------|----|
| ENSG00000252459 | 5.13E-15 | -2.63127 | 1 | 1 SNORA27    | -- |
| ENSG00000252460 | 5.13E-15 | -2.63127 | 1 | 1 RNU6-635P  | -- |
| ENSG00000252461 | 5.13E-15 | -2.63127 | 1 | 1 SNORA43    | -- |
| ENSG00000252462 | 5.13E-15 | -2.63127 | 1 | 1 RNU6-113P  | -- |
| ENSG00000252463 | 5.13E-15 | -2.63127 | 1 | 1 RNU6-852P  | -- |
| ENSG00000252466 | 5.13E-15 | -2.63127 | 1 | 1 MIR2115    | -- |
| ENSG00000252467 | 5.13E-15 | -2.63127 | 1 | 1 RNU6-347P  | -- |
| ENSG00000252468 | 5.13E-15 | -2.63127 | 1 | 1 RNU2-57P   | -- |
| ENSG00000252470 | 5.13E-15 | -2.63127 | 1 | 1 RNU6-551P  | -- |
| ENSG00000252471 | 5.13E-15 | -2.63127 | 1 | 1 AC006328.1 | -- |
| ENSG00000252472 | 5.13E-15 | -2.63127 | 1 | 1 RNU6-521P  | -- |
| ENSG00000252474 | 5.13E-15 | -2.63127 | 1 | 1 RNU6-539P  | -- |
| ENSG00000252475 | 5.13E-15 | -2.63127 | 1 | 1 RNU6-1332P | -- |
| ENSG00000252476 | 5.13E-15 | -2.63127 | 1 | 1 SNORD112   | -- |
| ENSG00000252477 | 5.13E-15 | -2.63127 | 1 | 1 RNU6-134P  | -- |
| ENSG00000252478 | 5.13E-15 | -2.63127 | 1 | 1 RNU7-162P  | -- |
| ENSG00000252479 | 5.13E-15 | -2.63127 | 1 | 1 RNA5SP309  | -- |
| ENSG00000252480 | 5.13E-15 | -2.63127 | 1 | 1 RNU6-719P  | -- |
| ENSG00000252482 | 5.13E-15 | -2.63127 | 1 | 1 RNU7-22P   | -- |
| ENSG00000252483 | 5.13E-15 | -2.63127 | 1 | 1 RNU6-1178P | -- |
| ENSG00000252484 | 5.13E-15 | -2.63127 | 1 | 1 RN7SKP49   | -- |
| ENSG00000252485 | 5.13E-15 | -2.63127 | 1 | 1 Vault      | -- |
| ENSG00000252486 | 5.13E-15 | -2.63127 | 1 | 1 Y_RNA      | -- |
| ENSG00000252487 | 5.13E-15 | -2.63127 | 1 | 1 RNY4P20    | -- |
| ENSG00000252489 | 5.13E-15 | -2.63127 | 1 | 1 RNU6-197P  | -- |
| ENSG00000252490 | 5.13E-15 | -2.63127 | 1 | 1 RN7SKP66   | -- |
| ENSG00000252491 | 5.13E-15 | -2.63127 | 1 | 1 RNU1-142P  | -- |
| ENSG00000252495 | 5.13E-15 | -2.63127 | 1 | 1 SNORD112   | -- |
| ENSG00000252496 | 5.13E-15 | -2.63127 | 1 | 1 RNA5SP33   | -- |
| ENSG00000252497 | 5.13E-15 | -2.63127 | 1 | 1 RPPH1-2P   | -- |
| ENSG00000252499 | 5.13E-15 | -2.63127 | 1 | 1 RNU6-63P   | -- |
| ENSG00000252500 | 5.13E-15 | -2.63127 | 1 | 1 AC087433.1 | -- |
| ENSG00000252501 | 5.13E-15 | -2.63127 | 1 | 1 RNU4-77P   | -- |
| ENSG00000252502 | 5.13E-15 | -2.63127 | 1 | 1 SNORD112   | -- |
| ENSG00000252504 | 5.13E-15 | -2.63127 | 1 | 1 AC097015.1 | -- |
| ENSG00000252505 | 5.13E-15 | -2.63127 | 1 | 1 SNORA70    | -- |
| ENSG00000252506 | 5.13E-15 | -2.63127 | 1 | 1 RNU6-180P  | -- |
| ENSG00000252507 | 5.13E-15 | -2.63127 | 1 | 1 RNU7-81P   | -- |
| ENSG00000252508 | 5.13E-15 | -2.63127 | 1 | 1 RNU4ATAC3P | -- |
| ENSG00000252509 | 5.13E-15 | -2.63127 | 1 | 1 RNA5SP271  | -- |
| ENSG00000252510 | 5.13E-15 | -2.63127 | 1 | 1 RNA5SP55   | -- |
| ENSG00000252511 | 5.13E-15 | -2.63127 | 1 | 1 AC019330.2 | -- |
| ENSG00000252512 | 5.13E-15 | -2.63127 | 1 | 1 RNA5SP206  | -- |
| ENSG00000252513 | 5.13E-15 | -2.63127 | 1 | 1 RNU1-128P  | -- |
| ENSG00000252514 | 5.13E-15 | -2.63127 | 1 | 1 RNU7-53P   | -- |
| ENSG00000252517 | 5.13E-15 | -2.63127 | 1 | 1 SNORD59    | -- |
| ENSG00000252518 | 5.13E-15 | -2.63127 | 1 | 1 RNU6-846P  | -- |
| ENSG00000252519 | 5.13E-15 | -2.63127 | 1 | 1 RNU6-783P  | -- |
| ENSG00000252521 | 5.13E-15 | -2.63127 | 1 | 1 RNU5D-2P   | -- |
| ENSG00000252522 | 5.13E-15 | -2.63127 | 1 | 1 Y_RNA      | -- |
| ENSG00000252523 | 5.13E-15 | -2.63127 | 1 | 1 RNU6-267P  | -- |
| ENSG00000252524 | 5.13E-15 | -2.63127 | 1 | 1 Y_RNA      | -- |
| ENSG00000252525 | 5.13E-15 | -2.63127 | 1 | 1 snoU13     | -- |
| ENSG00000252526 | 5.13E-15 | -2.63127 | 1 | 1 SNORA70    | -- |
| ENSG00000252529 | 5.13E-15 | -2.63127 | 1 | 1 RNU3P3     | -- |
| ENSG00000252530 | 5.13E-15 | -2.63127 | 1 | 1 RNU6-965P  | -- |
| ENSG00000252531 | 5.13E-15 | -2.63127 | 1 | 1 SNORA73    | -- |
| ENSG00000252532 | 5.13E-15 | -2.63127 | 1 | 1 RNU7-193P  | -- |

|                 |          |          |   |               |    |
|-----------------|----------|----------|---|---------------|----|
| ENSG00000252533 | 5.13E-15 | -2.63127 | 1 | 1 RNU6-572P   | -- |
| ENSG00000252534 | 5.13E-15 | -2.63127 | 1 | 1 Y_RNA       | -- |
| ENSG00000252535 | 5.13E-15 | -2.63127 | 1 | 1 RNA5SP254   | -- |
| ENSG00000252536 | 5.13E-15 | -2.63127 | 1 | 1 U3          | -- |
| ENSG00000252537 | 5.13E-15 | -2.63127 | 1 | 1 SNORA31     | -- |
| ENSG00000252538 | 5.13E-15 | -2.63127 | 1 | 1 RNU6-1070P  | -- |
| ENSG00000252539 | 5.13E-15 | -2.63127 | 1 | 1 RNA5SP462   | -- |
| ENSG00000252540 | 5.13E-15 | -2.63127 | 1 | 1 RNU6-919P   | -- |
| ENSG00000252541 | 5.13E-15 | -2.63127 | 1 | 1 AC092905.1  | -- |
| ENSG00000252542 | 5.13E-15 | -2.63127 | 1 | 1 SNORD36C    | -- |
| ENSG00000252544 | 5.13E-15 | -2.63127 | 1 | 1 RNU6-1282P  | -- |
| ENSG00000252545 | 5.13E-15 | -2.63127 | 1 | 1 RNU6-362P   | -- |
| ENSG00000252546 | 5.13E-15 | -2.63127 | 1 | 1 RNA5SP466   | -- |
| ENSG00000252547 | 5.13E-15 | -2.63127 | 1 | 1 AC139931.1  | -- |
| ENSG00000252548 | 5.13E-15 | -2.63127 | 1 | 1 RNU7-149P   | -- |
| ENSG00000252550 | 5.13E-15 | -2.63127 | 1 | 1 SNORA25     | -- |
| ENSG00000252553 | 5.13E-15 | -2.63127 | 1 | 1 RNA5SP73    | -- |
| ENSG00000252554 | 5.13E-15 | -2.63127 | 1 | 1 RNU6-861P   | -- |
| ENSG00000252555 | 5.13E-15 | -2.63127 | 1 | 1 RNU6-567P   | -- |
| ENSG00000252556 | 5.13E-15 | -2.63127 | 1 | 1 RNU6-256P   | -- |
| ENSG00000252557 | 5.13E-15 | -2.63127 | 1 | 1 SNORD112    | -- |
| ENSG00000252558 | 5.13E-15 | -2.63127 | 1 | 1 RNU6-914P   | -- |
| ENSG00000252559 | 5.13E-15 | -2.63127 | 1 | 1 SNORD112    | -- |
| ENSG00000252560 | 5.13E-15 | -2.63127 | 1 | 1 RNU4-18P    | -- |
| ENSG00000252561 | 5.13E-15 | -2.63127 | 1 | 1 RNU1-125P   | -- |
| ENSG00000252562 | 5.13E-15 | -2.63127 | 1 | 1 RNU6-922P   | -- |
| ENSG00000252563 | 5.13E-15 | -2.63127 | 1 | 1 RNA5SP45    | -- |
| ENSG00000252565 | 5.13E-15 | -2.63127 | 1 | 1 SNORD112    | -- |
| ENSG00000252566 | 5.13E-15 | -2.63127 | 1 | 1 SNORD112    | -- |
| ENSG00000252568 | 5.13E-15 | -2.63127 | 1 | 1 RNU7-28P    | -- |
| ENSG00000252569 | 5.13E-15 | -2.63127 | 1 | 1 RNU6-1153P  | -- |
| ENSG00000252571 | 5.13E-15 | -2.63127 | 1 | 1 SCARNA17    | -- |
| ENSG00000252572 | 5.13E-15 | -2.63127 | 1 | 1 SNORD112    | -- |
| ENSG00000252574 | 5.13E-15 | -2.63127 | 1 | 1 RNU5B-6P    | -- |
| ENSG00000252575 | 5.13E-15 | -2.63127 | 1 | 1 BX470187.1  | -- |
| ENSG00000252576 | 5.13E-15 | -2.63127 | 1 | 1 snR65       | -- |
| ENSG00000252577 | 5.13E-15 | -2.63127 | 1 | 1 SCARNA20    | -- |
| ENSG00000252578 | 5.13E-15 | -2.63127 | 1 | 1 RNU6-135P   | -- |
| ENSG00000252580 | 5.13E-15 | -2.63127 | 1 | 1 SNORA31     | -- |
| ENSG00000252581 | 5.13E-15 | -2.63127 | 1 | 1 RNU6-1098P  | -- |
| ENSG00000252582 | 5.13E-15 | -2.63127 | 1 | 1 SNORA31     | -- |
| ENSG00000252583 | 5.13E-15 | -2.63127 | 1 | 1 MIR514B     | -- |
| ENSG00000252584 | 5.13E-15 | -2.63127 | 1 | 1 AC023050.1  | -- |
| ENSG00000252586 | 5.13E-15 | -2.63127 | 1 | 1 AC002992.1  | -- |
| ENSG00000252587 | 5.13E-15 | -2.63127 | 1 | 1 RNA5SP422   | -- |
| ENSG00000252591 | 5.13E-15 | -2.63127 | 1 | 1 RNA5SP468   | -- |
| ENSG00000252592 | 5.13E-15 | -2.63127 | 1 | 1 SNORD112    | -- |
| ENSG00000252593 | 5.13E-15 | -2.63127 | 1 | 1 RNU6-1224P  | -- |
| ENSG00000252594 | 5.13E-15 | -2.63127 | 1 | 1 RNU6-656P   | -- |
| ENSG00000252595 | 5.13E-15 | -2.63127 | 1 | 1 RN7SKP82    | -- |
| ENSG00000252597 | 5.13E-15 | -2.63127 | 1 | 1 RNU7-137P   | -- |
| ENSG00000252598 | 5.13E-15 | -2.63127 | 1 | 1 RNA5SP460   | -- |
| ENSG00000252601 | 5.13E-15 | -2.63127 | 1 | 1 SNORA18     | -- |
| ENSG00000252603 | 5.13E-15 | -2.63127 | 1 | 1 RNU6ATAC22P | -- |
| ENSG00000252604 | 5.13E-15 | -2.63127 | 1 | 1 RNU2-44P    | -- |
| ENSG00000252605 | 5.13E-15 | -2.63127 | 1 | 1 SCARNA18    | -- |
| ENSG00000252606 | 5.13E-15 | -2.63127 | 1 | 1 RNU6-1150P  | -- |
| ENSG00000252607 | 5.13E-15 | -2.63127 | 1 | 1 Y_RNA       | -- |

|                 |          |          |   |              |    |
|-----------------|----------|----------|---|--------------|----|
| ENSG00000252608 | 5.13E-15 | -2.63127 | 1 | 1 RNU6-1191P | -- |
| ENSG00000252609 | 5.13E-15 | -2.63127 | 1 | 1 snoU13     | -- |
| ENSG00000252611 | 5.13E-15 | -2.63127 | 1 | 1 RNU6-1121P | -- |
| ENSG00000252612 | 5.13E-15 | -2.63127 | 1 | 1 Y_RNA      | -- |
| ENSG00000252613 | 5.13E-15 | -2.63127 | 1 | 1 RNU7-168P  | -- |
| ENSG00000252615 | 5.13E-15 | -2.63127 | 1 | 1 Y_RNA      | -- |
| ENSG00000252616 | 5.13E-15 | -2.63127 | 1 | 1 AC079140.1 | -- |
| ENSG00000252617 | 5.13E-15 | -2.63127 | 1 | 1 SNORA70    | -- |
| ENSG00000252619 | 5.13E-15 | -2.63127 | 1 | 1 RNU6-1149P | -- |
| ENSG00000252621 | 5.13E-15 | -2.63127 | 1 | 1 Y_RNA      | -- |
| ENSG00000252622 | 5.13E-15 | -2.63127 | 1 | 1 RNU6-881P  | -- |
| ENSG00000252623 | 5.13E-15 | -2.63127 | 1 | 1 RNA5SP481  | -- |
| ENSG00000252624 | 5.13E-15 | -2.63127 | 1 | 1 RNA5SP409  | -- |
| ENSG00000252625 | 5.13E-15 | -2.63127 | 1 | 1 RNU1-40P   | -- |
| ENSG00000252626 | 5.13E-15 | -2.63127 | 1 | 1 RNU6-1308P | -- |
| ENSG00000252627 | 5.13E-15 | -2.63127 | 1 | 1 RNU6-122P  | -- |
| ENSG00000252628 | 5.13E-15 | -2.63127 | 1 | 1 RNU6-453P  | -- |
| ENSG00000252629 | 5.13E-15 | -2.63127 | 1 | 1 AL050316.1 | -- |
| ENSG00000252633 | 5.13E-15 | -2.63127 | 1 | 1 RN7SKP282  | -- |
| ENSG00000252634 | 5.13E-15 | -2.63127 | 1 | 1 RN7SKP219  | -- |
| ENSG00000252635 | 5.13E-15 | -2.63127 | 1 | 1 RNU2-56P   | -- |
| ENSG00000252638 | 5.13E-15 | -2.63127 | 1 | 1 snoU13     | -- |
| ENSG00000252639 | 5.13E-15 | -2.63127 | 1 | 1 RNU2-24P   | -- |
| ENSG00000252640 | 5.13E-15 | -2.63127 | 1 | 1 snoU109    | -- |
| ENSG00000252642 | 5.13E-15 | -2.63127 | 1 | 1 RNA5SP137  | -- |
| ENSG00000252644 | 5.13E-15 | -2.63127 | 1 | 1 RNU7-30P   | -- |
| ENSG00000252646 | 5.13E-15 | -2.63127 | 1 | 1 SNORD112   | -- |
| ENSG00000252647 | 5.13E-15 | -2.63127 | 1 | 1 RNA5SP416  | -- |
| ENSG00000252648 | 5.13E-15 | -2.63127 | 1 | 1 AC078993.1 | -- |
| ENSG00000252649 | 5.13E-15 | -2.63127 | 1 | 1 RNA5SP480  | -- |
| ENSG00000252650 | 5.13E-15 | -2.63127 | 1 | 1 RNA5SP75   | -- |
| ENSG00000252651 | 5.13E-15 | -2.63127 | 1 | 1 RNU6-557P  | -- |
| ENSG00000252652 | 5.13E-15 | -2.63127 | 1 | 1 Y_RNA      | -- |
| ENSG00000252653 | 5.13E-15 | -2.63127 | 1 | 1 RNA5SP444  | -- |
| ENSG00000252654 | 5.13E-15 | -2.63127 | 1 | 1 RNU7-6P    | -- |
| ENSG00000252655 | 5.13E-15 | -2.63127 | 1 | 1 Y_RNA      | -- |
| ENSG00000252656 | 5.13E-15 | -2.63127 | 1 | 1 RN7SKP88   | -- |
| ENSG00000252657 | 5.13E-15 | -2.63127 | 1 | 1 SNORA70    | -- |
| ENSG00000252658 | 5.13E-15 | -2.63127 | 1 | 1 RNU6-786P  | -- |
| ENSG00000252659 | 5.13E-15 | -2.63127 | 1 | 1 RNU6-1088P | -- |
| ENSG00000252660 | 5.13E-15 | -2.63127 | 1 | 1 Y_RNA      | -- |
| ENSG00000252661 | 5.13E-15 | -2.63127 | 1 | 1 RNU6-782P  | -- |
| ENSG00000252662 | 5.13E-15 | -2.63127 | 1 | 1 AC099545.1 | -- |
| ENSG00000252663 | 5.13E-15 | -2.63127 | 1 | 1 RN7SKP201  | -- |
| ENSG00000252664 | 5.13E-15 | -2.63127 | 1 | 1 AC017020.1 | -- |
| ENSG00000252667 | 5.13E-15 | -2.63127 | 1 | 1 RNA5SP523  | -- |
| ENSG00000252668 | 5.13E-15 | -2.63127 | 1 | 1 snoU13     | -- |
| ENSG00000252669 | 5.13E-15 | -2.63127 | 1 | 1 U3         | -- |
| ENSG00000252670 | 5.13E-15 | -2.63127 | 1 | 1 Y_RNA      | -- |
| ENSG00000252671 | 5.13E-15 | -2.63127 | 1 | 1 Y_RNA      | -- |
| ENSG00000252672 | 5.13E-15 | -2.63127 | 1 | 1 snoZ185    | -- |
| ENSG00000252673 | 5.13E-15 | -2.63127 | 1 | 1 RNA5SP421  | -- |
| ENSG00000252674 | 5.13E-15 | -2.63127 | 1 | 1 RNA5SP102  | -- |
| ENSG00000252675 | 5.13E-15 | -2.63127 | 1 | 1 RNU6-52P   | -- |
| ENSG00000252676 | 5.13E-15 | -2.63127 | 1 | 1 AL391559.1 | -- |
| ENSG00000252677 | 5.13E-15 | -2.63127 | 1 | 1 SNORA81    | -- |
| ENSG00000252679 | 5.13E-15 | -2.63127 | 1 | 1 snoU13     | -- |
| ENSG00000252680 | 5.13E-15 | -2.63127 | 1 | 1 RNA5SP449  | -- |

|                 |          |          |   |               |    |
|-----------------|----------|----------|---|---------------|----|
| ENSG00000252681 | 5.13E-15 | -2.63127 | 1 | 1 RNU1-97P    | -- |
| ENSG00000252682 | 5.13E-15 | -2.63127 | 1 | 1 SNORD59     | -- |
| ENSG00000252683 | 5.13E-15 | -2.63127 | 1 | 1 U3          | -- |
| ENSG00000252684 | 5.13E-15 | -2.63127 | 1 | 1 RNU6ATAC36P | -- |
| ENSG00000252685 | 5.13E-15 | -2.63127 | 1 | 1 RNU6-928P   | -- |
| ENSG00000252686 | 5.13E-15 | -2.63127 | 1 | 1 RNU6-1234P  | -- |
| ENSG00000252687 | 5.13E-15 | -2.63127 | 1 | 1 SNORD112    | -- |
| ENSG00000252688 | 5.13E-15 | -2.63127 | 1 | 1 RNU6-579P   | -- |
| ENSG00000252689 | 5.13E-15 | -2.63127 | 1 | 1 SNORA20     | -- |
| ENSG00000252691 | 5.13E-15 | -2.63127 | 1 | 1 SCARNA18    | -- |
| ENSG00000252692 | 5.13E-15 | -2.63127 | 1 | 1 SNORD60     | -- |
| ENSG00000252693 | 5.13E-15 | -2.63127 | 1 | 1 SNORA40     | -- |
| ENSG00000252694 | 5.13E-15 | -2.63127 | 1 | 1 AC006371.1  | -- |
| ENSG00000252695 | 5.13E-15 | -2.63127 | 1 | 1 MIR2276     | -- |
| ENSG00000252696 | 5.13E-15 | -2.63127 | 1 | 1 RNA5SP34    | -- |
| ENSG00000252697 | 5.13E-15 | -2.63127 | 1 | 1 RN7SKP209   | -- |
| ENSG00000252698 | 5.13E-15 | -2.63127 | 1 | 1 RNU7-101P   | -- |
| ENSG00000252699 | 5.13E-15 | -2.63127 | 1 | 1 SNORA21     | -- |
| ENSG00000252700 | 5.13E-15 | -2.63127 | 1 | 1 RNU7-110P   | -- |
| ENSG00000252702 | 5.13E-15 | -2.63127 | 1 | 1 RNU7-158P   | -- |
| ENSG00000252703 | 5.13E-15 | -2.63127 | 1 | 1 RNU6-1182P  | -- |
| ENSG00000252704 | 5.13E-15 | -2.63127 | 1 | 1 RN7SKP277   | -- |
| ENSG00000252705 | 5.13E-15 | -2.63127 | 1 | 1 RNU6-175P   | -- |
| ENSG00000252706 | 5.13E-15 | -2.63127 | 1 | 1 snoU13      | -- |
| ENSG00000252709 | 5.13E-15 | -2.63127 | 1 | 1 U3          | -- |
| ENSG00000252710 | 5.13E-15 | -2.63127 | 1 | 1 RNU6-295P   | -- |
| ENSG00000252711 | 5.13E-15 | -2.63127 | 1 | 1 RN7SKP116   | -- |
| ENSG00000252712 | 5.13E-15 | -2.63127 | 1 | 1 SCARNA14    | -- |
| ENSG00000252713 | 5.13E-15 | -2.63127 | 1 | 1 RNU6-1198P  | -- |
| ENSG00000252714 | 5.13E-15 | -2.63127 | 1 | 1 RNA5SP392   | -- |
| ENSG00000252715 | 5.13E-15 | -2.63127 | 1 | 1 RNU6-265P   | -- |
| ENSG00000252716 | 5.13E-15 | -2.63127 | 1 | 1 RN7SKP260   | -- |
| ENSG00000252717 | 5.13E-15 | -2.63127 | 1 | 1 RNU6-352P   | -- |
| ENSG00000252718 | 5.13E-15 | -2.63127 | 1 | 1 RNU6-612P   | -- |
| ENSG00000252719 | 5.13E-15 | -2.63127 | 1 | 1 SNORA18     | -- |
| ENSG00000252720 | 5.13E-15 | -2.63127 | 1 | 1 RNU6-1258P  | -- |
| ENSG00000252721 | 5.13E-15 | -2.63127 | 1 | 1 RNU6-798P   | -- |
| ENSG00000252722 | 5.13E-15 | -2.63127 | 1 | 1 SCARNA20    | -- |
| ENSG00000252723 | 5.13E-15 | -2.63127 | 1 | 1 RNU6-677P   | -- |
| ENSG00000252724 | 5.13E-15 | -2.63127 | 1 | 1 SNORA70     | -- |
| ENSG00000252725 | 5.13E-15 | -2.63127 | 1 | 1 RNU6-765P   | -- |
| ENSG00000252726 | 5.13E-15 | -2.63127 | 1 | 1 RNA5SP94    | -- |
| ENSG00000252727 | 5.13E-15 | -2.63127 | 1 | 1 SCARNA11    | -- |
| ENSG00000252728 | 5.13E-15 | -2.63127 | 1 | 1 SNORD112    | -- |
| ENSG00000252729 | 5.13E-15 | -2.63127 | 1 | 1 RNU6-971P   | -- |
| ENSG00000252730 | 5.13E-15 | -2.63127 | 1 | 1 RN7SKP84    | -- |
| ENSG00000252731 | 5.13E-15 | -2.63127 | 1 | 1 AL161793.1  | -- |
| ENSG00000252732 | 5.13E-15 | -2.63127 | 1 | 1 Y_RNA       | -- |
| ENSG00000252733 | 5.13E-15 | -2.63127 | 1 | 1 AC067718.1  | -- |
| ENSG00000252734 | 5.13E-15 | -2.63127 | 1 | 1 RNU6-980P   | -- |
| ENSG00000252735 | 5.13E-15 | -2.63127 | 1 | 1 RNU6-528P   | -- |
| ENSG00000252736 | 5.13E-15 | -2.63127 | 1 | 1 Y_RNA       | -- |
| ENSG00000252738 | 5.13E-15 | -2.63127 | 1 | 1 RNU6-515P   | -- |
| ENSG00000252739 | 5.13E-15 | -2.63127 | 1 | 1 RNU7-151P   | -- |
| ENSG00000252740 | 5.13E-15 | -2.63127 | 1 | 1 SNORD112    | -- |
| ENSG00000252742 | 5.13E-15 | -2.63127 | 1 | 1 Y_RNA       | -- |
| ENSG00000252743 | 5.13E-15 | -2.63127 | 1 | 1 RNU6-850P   | -- |
| ENSG00000252744 | 5.13E-15 | -2.63127 | 1 | 1 Y_RNA       | -- |

|                 |          |          |   |               |    |
|-----------------|----------|----------|---|---------------|----|
| ENSG00000252745 | 5.13E-15 | -2.63127 | 1 | 1 RNA5SP143   | -- |
| ENSG00000252746 | 5.13E-15 | -2.63127 | 1 | 1 RNU6-273P   | -- |
| ENSG00000252747 | 5.13E-15 | -2.63127 | 1 | 1 RNA5SP364   | -- |
| ENSG00000252748 | 5.13E-15 | -2.63127 | 1 | 1 AL096869.1  | -- |
| ENSG00000252749 | 5.13E-15 | -2.63127 | 1 | 1 RNU7-116P   | -- |
| ENSG00000252750 | 5.13E-15 | -2.63127 | 1 | 1 RNU7-70P    | -- |
| ENSG00000252751 | 5.13E-15 | -2.63127 | 1 | 1 RNU6-143P   | -- |
| ENSG00000252752 | 5.13E-15 | -2.63127 | 1 | 1 RNU6-210P   | -- |
| ENSG00000252753 | 5.13E-15 | -2.63127 | 1 | 1 RNU6-1202P  | -- |
| ENSG00000252754 | 5.13E-15 | -2.63127 | 1 | 1 RNA5SP313   | -- |
| ENSG00000252755 | 5.13E-15 | -2.63127 | 1 | 1 RNU6-703P   | -- |
| ENSG00000252756 | 5.13E-15 | -2.63127 | 1 | 1 RNU6-577P   | -- |
| ENSG00000252757 | 5.13E-15 | -2.63127 | 1 | 1 RN7SKP96    | -- |
| ENSG00000252758 | 5.13E-15 | -2.63127 | 1 | 1 RNU6-445P   | -- |
| ENSG00000252759 | 5.13E-15 | -2.63127 | 1 | 1 Y_RNA       | -- |
| ENSG00000252760 | 5.13E-15 | -2.63127 | 1 | 1 RNA5SP54    | -- |
| ENSG00000252761 | 5.13E-15 | -2.63127 | 1 | 1 Y_RNA       | -- |
| ENSG00000252762 | 5.13E-15 | -2.63127 | 1 | 1 SNORA31     | -- |
| ENSG00000252763 | 5.13E-15 | -2.63127 | 1 | 1 RNU2-31P    | -- |
| ENSG00000252764 | 5.13E-15 | -2.63127 | 1 | 1 RNU6-1092P  | -- |
| ENSG00000252765 | 5.13E-15 | -2.63127 | 1 | 1 SCARNA16    | -- |
| ENSG00000252766 | 5.13E-15 | -2.63127 | 1 | 1 RNU6-255P   | -- |
| ENSG00000252767 | 5.13E-15 | -2.63127 | 1 | 1 RNU6-250P   | -- |
| ENSG00000252768 | 5.13E-15 | -2.63127 | 1 | 1 RNU6-856P   | -- |
| ENSG00000252769 | 5.13E-15 | -2.63127 | 1 | 1 RNU6-943P   | -- |
| ENSG00000252770 | 5.13E-15 | -2.63127 | 1 | 1 RNU7-4P     | -- |
| ENSG00000252771 | 5.13E-15 | -2.63127 | 1 | 1 snoU13      | -- |
| ENSG00000252772 | 5.13E-15 | -2.63127 | 1 | 1 RNU6-714P   | -- |
| ENSG00000252774 | 5.13E-15 | -2.63127 | 1 | 1 SNORA48     | -- |
| ENSG00000252776 | 5.13E-15 | -2.63127 | 1 | 1 RNU4ATAC10P | -- |
| ENSG00000252777 | 5.13E-15 | -2.63127 | 1 | 1 SCARNA24    | -- |
| ENSG00000252778 | 5.13E-15 | -2.63127 | 1 | 1 SCARNA20    | -- |
| ENSG00000252779 | 5.13E-15 | -2.63127 | 1 | 1 RNU6-182P   | -- |
| ENSG00000252780 | 5.13E-15 | -2.63127 | 1 | 1 RNA5SP471   | -- |
| ENSG00000252783 | 5.13E-15 | -2.63127 | 1 | 1 RNU6-835P   | -- |
| ENSG00000252784 | 5.13E-15 | -2.63127 | 1 | 1 Y_RNA       | -- |
| ENSG00000252785 | 5.13E-15 | -2.63127 | 1 | 1 AC103809.1  | -- |
| ENSG00000252786 | 5.13E-15 | -2.63127 | 1 | 1 RNU6-1142P  | -- |
| ENSG00000252787 | 5.13E-15 | -2.63127 | 1 | 1 SNORD19B    | -- |
| ENSG00000252789 | 5.13E-15 | -2.63127 | 1 | 1 AC006487.1  | -- |
| ENSG00000252790 | 5.13E-15 | -2.63127 | 1 | 1 SNORD112    | -- |
| ENSG00000252791 | 5.13E-15 | -2.63127 | 1 | 1 Y_RNA       | -- |
| ENSG00000252792 | 5.13E-15 | -2.63127 | 1 | 1 U3          | -- |
| ENSG00000252793 | 5.13E-15 | -2.63127 | 1 | 1 RNA5SP196   | -- |
| ENSG00000252794 | 5.13E-15 | -2.63127 | 1 | 1 RN7SKP60    | -- |
| ENSG00000252795 | 5.13E-15 | -2.63127 | 1 | 1 RNU6-56P    | -- |
| ENSG00000252796 | 5.13E-15 | -2.63127 | 1 | 1 RNU7-11P    | -- |
| ENSG00000252798 | 5.13E-15 | -2.63127 | 1 | 1 SCARNA6     | -- |
| ENSG00000252799 | 5.13E-15 | -2.63127 | 1 | 1 snoU13      | -- |
| ENSG00000252800 | 5.13E-15 | -2.63127 | 1 | 1 SCARNA20    | -- |
| ENSG00000252801 | 5.13E-15 | -2.63127 | 1 | 1 AC067735.1  | -- |
| ENSG00000252802 | 5.13E-15 | -2.63127 | 1 | 1 Y_RNA       | -- |
| ENSG00000252803 | 5.13E-15 | -2.63127 | 1 | 1 RNU6-870P   | -- |
| ENSG00000252804 | 5.13E-15 | -2.63127 | 1 | 1 RNU6-958P   | -- |
| ENSG00000252805 | 5.13E-15 | -2.63127 | 1 | 1 U3          | -- |
| ENSG00000252806 | 5.13E-15 | -2.63127 | 1 | 1 RNA5SP420   | -- |
| ENSG00000252807 | 5.13E-15 | -2.63127 | 1 | 1 RNU6-1006P  | -- |
| ENSG00000252809 | 5.13E-15 | -2.63127 | 1 | 1 AC135050.1  | -- |

|                 |          |          |   |                |    |
|-----------------|----------|----------|---|----------------|----|
| ENSG00000252810 | 5.13E-15 | -2.63127 | 1 | 1 RNU6-345P    | -- |
| ENSG00000252811 | 5.13E-15 | -2.63127 | 1 | 1 AC008085.1   | -- |
| ENSG00000252812 | 5.13E-15 | -2.63127 | 1 | 1 RN7SKP2      | -- |
| ENSG00000252813 | 5.13E-15 | -2.63127 | 1 | 1 AC108861.1   | -- |
| ENSG00000252814 | 5.13E-15 | -2.63127 | 1 | 1 RN7SKP233    | -- |
| ENSG00000252815 | 5.13E-15 | -2.63127 | 1 | 1 RNU6-410P    | -- |
| ENSG00000252816 | 5.13E-15 | -2.63127 | 1 | 1 RNA5SP337    | -- |
| ENSG00000252818 | 5.13E-15 | -2.63127 | 1 | 1 RNU7-146P    | -- |
| ENSG00000252819 | 5.13E-15 | -2.63127 | 1 | 1 AL121898.1   | -- |
| ENSG00000252820 | 5.13E-15 | -2.63127 | 1 | 1 Y_RNA        | -- |
| ENSG00000252822 | 5.13E-15 | -2.63127 | 1 | 1 Y_RNA        | -- |
| ENSG00000252823 | 5.13E-15 | -2.63127 | 1 | 1 RNU6-148P    | -- |
| ENSG00000252824 | 5.13E-15 | -2.63127 | 1 | 1 SNORA48      | -- |
| ENSG00000252825 | 5.13E-15 | -2.63127 | 1 | 1 RNU6-1253P   | -- |
| ENSG00000252826 | 5.13E-15 | -2.63127 | 1 | 1 RNU1-92P     | -- |
| ENSG00000252828 | 5.13E-15 | -2.63127 | 1 | 1 RNA5SP135    | -- |
| ENSG00000252829 | 5.13E-15 | -2.63127 | 1 | 1 SCARNA4      | -- |
| ENSG00000252831 | 5.13E-15 | -2.63127 | 1 | 1 AC005215.1   | -- |
| ENSG00000252832 | 5.13E-15 | -2.63127 | 1 | 1 RNU6-1212P   | -- |
| ENSG00000252833 | 5.13E-15 | -2.63127 | 1 | 1 RNA5SP186    | -- |
| ENSG00000252835 | 5.13E-15 | -2.63127 | 1 | 1 SCARNA21     | -- |
| ENSG00000252837 | 5.13E-15 | -2.63127 | 1 | 1 RN7SKP99     | -- |
| ENSG00000252838 | 5.13E-15 | -2.63127 | 1 | 1 RN7SKP23     | -- |
| ENSG00000252840 | 5.13E-15 | -2.63127 | 1 | 1 SNORA44      | -- |
| ENSG00000252841 | 5.13E-15 | -2.63127 | 1 | 1 Z98044.1     | -- |
| ENSG00000252842 | 5.13E-15 | -2.63127 | 1 | 1 RNU1-135P    | -- |
| ENSG00000252844 | 5.13E-15 | -2.63127 | 1 | 1 SNORD112     | -- |
| ENSG00000252845 | 5.13E-15 | -2.63127 | 1 | 1 RNA5SP101    | -- |
| ENSG00000252846 | 5.13E-15 | -2.63127 | 1 | 1 AC090206.1   | -- |
| ENSG00000252848 | 5.13E-15 | -2.63127 | 1 | 1 RNA5SP230    | -- |
| ENSG00000252849 | 5.13E-15 | -2.63127 | 1 | 1 snosnR60_Z15 | -- |
| ENSG00000252850 | 5.13E-15 | -2.63127 | 1 | 1 RNU1-117P    | -- |
| ENSG00000252852 | 5.13E-15 | -2.63127 | 1 | 1 SNORA31      | -- |
| ENSG00000252853 | 5.13E-15 | -2.63127 | 1 | 1 SNORD112     | -- |
| ENSG00000252854 | 5.13E-15 | -2.63127 | 1 | 1 RN7SKP5      | -- |
| ENSG00000252855 | 5.13E-15 | -2.63127 | 1 | 1 AC134878.1   | -- |
| ENSG00000252856 | 5.13E-15 | -2.63127 | 1 | 1 RNA5SP503    | -- |
| ENSG00000252857 | 5.13E-15 | -2.63127 | 1 | 1 RNU6-389P    | -- |
| ENSG00000252858 | 5.13E-15 | -2.63127 | 1 | 1 RNU6-1271P   | -- |
| ENSG00000252860 | 5.13E-15 | -2.63127 | 1 | 1 RNU6-570P    | -- |
| ENSG00000252861 | 5.13E-15 | -2.63127 | 1 | 1 RNU6-448P    | -- |
| ENSG00000252863 | 5.13E-15 | -2.63127 | 1 | 1 RNU6-1183P   | -- |
| ENSG00000252864 | 5.13E-15 | -2.63127 | 1 | 1 RNA5SP278    | -- |
| ENSG00000252866 | 5.13E-15 | -2.63127 | 1 | 1 RNA5SP243    | -- |
| ENSG00000252867 | 5.13E-15 | -2.63127 | 1 | 1 RNU6-909P    | -- |
| ENSG00000252868 | 5.13E-15 | -2.63127 | 1 | 1 snoZ278      | -- |
| ENSG00000252869 | 5.13E-15 | -2.63127 | 1 | 1 AL159140.1   | -- |
| ENSG00000252870 | 5.13E-15 | -2.63127 | 1 | 1 ACA59        | -- |
| ENSG00000252872 | 5.13E-15 | -2.63127 | 1 | 1 RNU7-188P    | -- |
| ENSG00000252873 | 5.13E-15 | -2.63127 | 1 | 1 SNORD112     | -- |
| ENSG00000252876 | 5.13E-15 | -2.63127 | 1 | 1 RNU7-199P    | -- |
| ENSG00000252877 | 5.13E-15 | -2.63127 | 1 | 1 RNA5SP312    | -- |
| ENSG00000252878 | 5.13E-15 | -2.63127 | 1 | 1 SNORA70      | -- |
| ENSG00000252879 | 5.13E-15 | -2.63127 | 1 | 1 RN7SKP98     | -- |
| ENSG00000252880 | 5.13E-15 | -2.63127 | 1 | 1 RNU6-459P    | -- |
| ENSG00000252881 | 5.13E-15 | -2.63127 | 1 | 1 RNU6-334P    | -- |
| ENSG00000252882 | 5.13E-15 | -2.63127 | 1 | 1 RNU6-1137P   | -- |
| ENSG00000252883 | 5.13E-15 | -2.63127 | 1 | 1 SNORD112     | -- |

|                 |          |          |   |              |    |
|-----------------|----------|----------|---|--------------|----|
| ENSG00000252884 | 5.13E-15 | -2.63127 | 1 | 1 RNU6-1213P | -- |
| ENSG00000252886 | 5.13E-15 | -2.63127 | 1 | 1 RN7SKP197  | -- |
| ENSG00000252887 | 5.13E-15 | -2.63127 | 1 | 1 RNU6-430P  | -- |
| ENSG00000252888 | 5.13E-15 | -2.63127 | 1 | 1 SNORA31    | -- |
| ENSG00000252889 | 5.13E-15 | -2.63127 | 1 | 1 RNU6-1236P | -- |
| ENSG00000252890 | 5.13E-15 | -2.63127 | 1 | 1 RNU6-699P  | -- |
| ENSG00000252891 | 5.13E-15 | -2.63127 | 1 | 1 Y_RNA      | -- |
| ENSG00000252892 | 5.13E-15 | -2.63127 | 1 | 1 RNU6-548P  | -- |
| ENSG00000252894 | 5.13E-15 | -2.63127 | 1 | 1 Y_RNA      | -- |
| ENSG00000252895 | 5.13E-15 | -2.63127 | 1 | 1 RNY4P26    | -- |
| ENSG00000252897 | 5.13E-15 | -2.63127 | 1 | 1 RNU6-685P  | -- |
| ENSG00000252898 | 5.13E-15 | -2.63127 | 1 | 1 RNU6-1096P | -- |
| ENSG00000252900 | 5.13E-15 | -2.63127 | 1 | 1 RNU6-303P  | -- |
| ENSG00000252901 | 5.13E-15 | -2.63127 | 1 | 1 AL669914.1 | -- |
| ENSG00000252902 | 5.13E-15 | -2.63127 | 1 | 1 RNA5SP342  | -- |
| ENSG00000252903 | 5.13E-15 | -2.63127 | 1 | 1 RNU6-894P  | -- |
| ENSG00000252904 | 5.13E-15 | -2.63127 | 1 | 1 SNORA76    | -- |
| ENSG00000252906 | 5.13E-15 | -2.63127 | 1 | 1 SCARNA3    | -- |
| ENSG00000252909 | 5.13E-15 | -2.63127 | 1 | 1 RNU6-201P  | -- |
| ENSG00000252912 | 5.13E-15 | -2.63127 | 1 | 1 RNA5SP439  | -- |
| ENSG00000252913 | 5.13E-15 | -2.63127 | 1 | 1 RNU6-158P  | -- |
| ENSG00000252917 | 5.13E-15 | -2.63127 | 1 | 1 SNORA74    | -- |
| ENSG00000252918 | 5.13E-15 | -2.63127 | 1 | 1 AL359709.2 | -- |
| ENSG00000252919 | 5.13E-15 | -2.63127 | 1 | 1 Y_RNA      | -- |
| ENSG00000252920 | 5.13E-15 | -2.63127 | 1 | 1 SNORA31    | -- |
| ENSG00000252921 | 5.13E-15 | -2.63127 | 1 | 1 U3         | -- |
| ENSG00000252922 | 5.13E-15 | -2.63127 | 1 | 1 RNU6-365P  | -- |
| ENSG00000252923 | 5.13E-15 | -2.63127 | 1 | 1 SCARNA16   | -- |
| ENSG00000252925 | 5.13E-15 | -2.63127 | 1 | 1 RNU1-68P   | -- |
| ENSG00000252927 | 5.13E-15 | -2.63127 | 1 | 1 RNA5SP404  | -- |
| ENSG00000252928 | 5.13E-15 | -2.63127 | 1 | 1 RNU6-64P   | -- |
| ENSG00000252929 | 5.13E-15 | -2.63127 | 1 | 1 RNU6-218P  | -- |
| ENSG00000252930 | 5.13E-15 | -2.63127 | 1 | 1 RNU6-1015P | -- |
| ENSG00000252931 | 5.13E-15 | -2.63127 | 1 | 1 RNU6-231P  | -- |
| ENSG00000252932 | 5.13E-15 | -2.63127 | 1 | 1 SNORD112   | -- |
| ENSG00000252934 | 5.13E-15 | -2.63127 | 1 | 1 RNU7-172P  | -- |
| ENSG00000252935 | 5.13E-15 | -2.63127 | 1 | 1 RNU6-1220P | -- |
| ENSG00000252936 | 5.13E-15 | -2.63127 | 1 | 1 RNA5SP423  | -- |
| ENSG00000252937 | 5.13E-15 | -2.63127 | 1 | 1 RNU6-1270P | -- |
| ENSG00000252940 | 5.13E-15 | -2.63127 | 1 | 1 AL357936.1 | -- |
| ENSG00000252941 | 5.13E-15 | -2.63127 | 1 | 1 RNA5SP340  | -- |
| ENSG00000252944 | 5.13E-15 | -2.63127 | 1 | 1 RNU6-897P  | -- |
| ENSG00000252945 | 5.13E-15 | -2.63127 | 1 | 1 snoU83B    | -- |
| ENSG00000252946 | 5.13E-15 | -2.63127 | 1 | 1 SNORD112   | -- |
| ENSG00000252947 | 5.13E-15 | -2.63127 | 1 | 1 SCARNA1    | -- |
| ENSG00000252948 | 5.13E-15 | -2.63127 | 1 | 1 RNU6-1314P | -- |
| ENSG00000252950 | 5.13E-15 | -2.63127 | 1 | 1 RNA5SP490  | -- |
| ENSG00000252951 | 5.13E-15 | -2.63127 | 1 | 1 RNA5SP165  | -- |
| ENSG00000252952 | 5.13E-15 | -2.63127 | 1 | 1 RNU6-58P   | -- |
| ENSG00000252953 | 5.13E-15 | -2.63127 | 1 | 1 RNU6-232P  | -- |
| ENSG00000252955 | 5.13E-15 | -2.63127 | 1 | 1 RNU4ATAC9P | -- |
| ENSG00000252956 | 5.13E-15 | -2.63127 | 1 | 1 RNA5SP40   | -- |
| ENSG00000252957 | 5.13E-15 | -2.63127 | 1 | 1 RNA5SP402  | -- |
| ENSG00000252958 | 5.13E-15 | -2.63127 | 1 | 1 AC009065.3 | -- |
| ENSG00000252959 | 5.13E-15 | -2.63127 | 1 | 1 RNA5SP170  | -- |
| ENSG00000252960 | 5.13E-15 | -2.63127 | 1 | 1 RN7SKP258  | -- |
| ENSG00000252961 | 5.13E-15 | -2.63127 | 1 | 1 SNORD112   | -- |
| ENSG00000252962 | 5.13E-15 | -2.63127 | 1 | 1 RNU6-993P  | -- |

|                 |          |          |   |              |    |
|-----------------|----------|----------|---|--------------|----|
| ENSG00000252963 | 5.13E-15 | -2.63127 | 1 | 1 RN7SKP147  | -- |
| ENSG00000252964 | 5.13E-15 | -2.63127 | 1 | 1 RNA5SP400  | -- |
| ENSG00000252966 | 5.13E-15 | -2.63127 | 1 | 1 RNU7-91P   | -- |
| ENSG00000252968 | 5.13E-15 | -2.63127 | 1 | 1 AC005370.1 | -- |
| ENSG00000252969 | 5.13E-15 | -2.63127 | 1 | 1 SNORA70    | -- |
| ENSG00000252973 | 5.13E-15 | -2.63127 | 1 | 1 RNU6-1028P | -- |
| ENSG00000252974 | 5.13E-15 | -2.63127 | 1 | 1 AC121334.1 | -- |
| ENSG00000252975 | 5.13E-15 | -2.63127 | 1 | 1 Y_RNA      | -- |
| ENSG00000252976 | 5.13E-15 | -2.63127 | 1 | 1 AC090644.1 | -- |
| ENSG00000252977 | 5.13E-15 | -2.63127 | 1 | 1 RNA5SP70   | -- |
| ENSG00000252978 | 5.13E-15 | -2.63127 | 1 | 1 RN7SKP183  | -- |
| ENSG00000252979 | 5.13E-15 | -2.63127 | 1 | 1 RNU6-165P  | -- |
| ENSG00000252980 | 5.13E-15 | -2.63127 | 1 | 1 RNU6-367P  | -- |
| ENSG00000252982 | 5.13E-15 | -2.63127 | 1 | 1 RN7SKP234  | -- |
| ENSG00000252983 | 5.13E-15 | -2.63127 | 1 | 1 RNU7-35P   | -- |
| ENSG00000252984 | 5.13E-15 | -2.63127 | 1 | 1 RNU6-844P  | -- |
| ENSG00000252985 | 5.13E-15 | -2.63127 | 1 | 1 SNORD116   | -- |
| ENSG00000252986 | 5.13E-15 | -2.63127 | 1 | 1 AC147651.2 | -- |
| ENSG00000252988 | 5.13E-15 | -2.63127 | 1 | 1 RNU6-111P  | -- |
| ENSG00000252989 | 5.13E-15 | -2.63127 | 1 | 1 SNORA31    | -- |
| ENSG00000252990 | 5.13E-15 | -2.63127 | 1 | 1 RNU1-54P   | -- |
| ENSG00000252991 | 5.13E-15 | -2.63127 | 1 | 1 RNU6-1073P | -- |
| ENSG00000252993 | 5.13E-15 | -2.63127 | 1 | 1 SNORA25    | -- |
| ENSG00000252994 | 5.13E-15 | -2.63127 | 1 | 1 RNU6-1231P | -- |
| ENSG00000252995 | 5.13E-15 | -2.63127 | 1 | 1 RNU6-667P  | -- |
| ENSG00000252996 | 5.13E-15 | -2.63127 | 1 | 1 RNU6-1315P | -- |
| ENSG00000252997 | 5.13E-15 | -2.63127 | 1 | 1 AC068533.1 | -- |
| ENSG00000252998 | 5.13E-15 | -2.63127 | 1 | 1 RNU6-889P  | -- |
| ENSG00000252999 | 5.13E-15 | -2.63127 | 1 | 1 RNA5SP380  | -- |
| ENSG00000253000 | 5.13E-15 | -2.63127 | 1 | 1 RNU1-45P   | -- |
| ENSG00000253001 | 5.13E-15 | -2.63127 | 1 | 1 RN7SKP105  | -- |
| ENSG00000253002 | 5.13E-15 | -2.63127 | 1 | 1 AC005725.1 | -- |
| ENSG00000253003 | 5.13E-15 | -2.63127 | 1 | 1 RNU6-1261P | -- |
| ENSG00000253004 | 5.13E-15 | -2.63127 | 1 | 1 U8         | -- |
| ENSG00000253005 | 5.13E-15 | -2.63127 | 1 | 1 RNU6-176P  | -- |
| ENSG00000253006 | 5.13E-15 | -2.63127 | 1 | 1 RN7SKP283  | -- |
| ENSG00000253007 | 5.13E-15 | -2.63127 | 1 | 1 SNORA76    | -- |
| ENSG00000253008 | 5.13E-15 | -2.63127 | 1 | 1 MIR2355    | -- |
| ENSG00000253009 | 5.13E-15 | -2.63127 | 1 | 1 U3         | -- |
| ENSG00000253010 | 5.13E-15 | -2.63127 | 1 | 1 RN7SKP256  | -- |
| ENSG00000253011 | 5.13E-15 | -2.63127 | 1 | 1 AC010928.1 | -- |
| ENSG00000253012 | 5.13E-15 | -2.63127 | 1 | 1 AC022538.1 | -- |
| ENSG00000253013 | 5.13E-15 | -2.63127 | 1 | 1 SNORA31    | -- |
| ENSG00000253014 | 5.13E-15 | -2.63127 | 1 | 1 U3         | -- |
| ENSG00000253015 | 5.13E-15 | -2.63127 | 1 | 1 RN7SKP64   | -- |
| ENSG00000253016 | 5.13E-15 | -2.63127 | 1 | 1 Y_RNA      | -- |
| ENSG00000253017 | 5.13E-15 | -2.63127 | 1 | 1 AL160037.1 | -- |
| ENSG00000253018 | 5.13E-15 | -2.63127 | 1 | 1 RNY4P31    | -- |
| ENSG00000253019 | 5.13E-15 | -2.63127 | 1 | 1 RN7SKP35   | -- |
| ENSG00000253020 | 5.13E-15 | -2.63127 | 1 | 1 RN7SKP40   | -- |
| ENSG00000253021 | 5.13E-15 | -2.63127 | 1 | 1 RNU6-902P  | -- |
| ENSG00000253022 | 5.13E-15 | -2.63127 | 1 | 1 RNU6-731P  | -- |
| ENSG00000253023 | 5.13E-15 | -2.63127 | 1 | 1 RNU7-156P  | -- |
| ENSG00000253024 | 5.13E-15 | -2.63127 | 1 | 1 RNU6-1238P | -- |
| ENSG00000253025 | 5.13E-15 | -2.63127 | 1 | 1 RNU2-12P   | -- |
| ENSG00000253026 | 5.13E-15 | -2.63127 | 1 | 1 RNU6-464P  | -- |
| ENSG00000253027 | 5.13E-15 | -2.63127 | 1 | 1 SNORA70    | -- |
| ENSG00000253028 | 5.13E-15 | -2.63127 | 1 | 1 SNORA31    | -- |



|                 |          |          |   |               |    |
|-----------------|----------|----------|---|---------------|----|
| ENSG00000253029 | 5.13E-15 | -2.63127 | 1 | 1 RNU6-568P   | -- |
| ENSG00000253030 | 5.13E-15 | -2.63127 | 1 | 1 MIR2116     | -- |
| ENSG00000253031 | 5.13E-15 | -2.63127 | 1 | 1 RNA5SP291   | -- |
| ENSG00000253032 | 5.13E-15 | -2.63127 | 1 | 1 RNU6-299P   | -- |
| ENSG00000253033 | 5.13E-15 | -2.63127 | 1 | 1 RNU7-191P   | -- |
| ENSG00000253035 | 5.13E-15 | -2.63127 | 1 | 1 RNU4ATAC5P  | -- |
| ENSG00000253036 | 5.13E-15 | -2.63127 | 1 | 1 snR65       | -- |
| ENSG00000253037 | 5.13E-15 | -2.63127 | 1 | 1 AL109947.2  | -- |
| ENSG00000253038 | 5.13E-15 | -2.63127 | 1 | 1 RNU6-706P   | -- |
| ENSG00000253039 | 5.13E-15 | -2.63127 | 1 | 1 RNA5SP47    | -- |
| ENSG00000253040 | 5.13E-15 | -2.63127 | 1 | 1 RNA5SP454   | -- |
| ENSG00000253041 | 5.13E-15 | -2.63127 | 1 | 1 SNORA31     | -- |
| ENSG00000253042 | 5.13E-15 | -2.63127 | 1 | 1 SNORA70     | -- |
| ENSG00000253043 | 5.13E-15 | -2.63127 | 1 | 1 RNU7-181P   | -- |
| ENSG00000253044 | 5.13E-15 | -2.63127 | 1 | 1 AL691452.1  | -- |
| ENSG00000253045 | 5.13E-15 | -2.63127 | 1 | 1 RMRPP1      | -- |
| ENSG00000253046 | 5.13E-15 | -2.63127 | 1 | 1 AC092841.1  | -- |
| ENSG00000253048 | 5.13E-15 | -2.63127 | 1 | 1 RNU4-60P    | -- |
| ENSG00000253049 | 5.13E-15 | -2.63127 | 1 | 1 SNORA43     | -- |
| ENSG00000253050 | 5.13E-15 | -2.63127 | 1 | 1 RNU6-868P   | -- |
| ENSG00000253052 | 5.13E-15 | -2.63127 | 1 | 1 U3          | -- |
| ENSG00000253053 | 5.13E-15 | -2.63127 | 1 | 1 RN7SKP289   | -- |
| ENSG00000253055 | 5.13E-15 | -2.63127 | 1 | 1 RNA5SP415   | -- |
| ENSG00000253056 | 5.13E-15 | -2.63127 | 1 | 1 RNU7-128P   | -- |
| ENSG00000253057 | 5.13E-15 | -2.63127 | 1 | 1 RN7SKP57    | -- |
| ENSG00000253058 | 5.13E-15 | -2.63127 | 1 | 1 RNA5SP437   | -- |
| ENSG00000253059 | 5.13E-15 | -2.63127 | 1 | 1 SNORA31     | -- |
| ENSG00000253060 | 5.13E-15 | -2.63127 | 1 | 1 SCARNA20    | -- |
| ENSG00000253062 | 5.13E-15 | -2.63127 | 1 | 1 RNU7-108P   | -- |
| ENSG00000253063 | 5.13E-15 | -2.63127 | 1 | 1 RNU6-494P   | -- |
| ENSG00000253064 | 5.13E-15 | -2.63127 | 1 | 1 RNU6-711P   | -- |
| ENSG00000253065 | 5.13E-15 | -2.63127 | 1 | 1 SNORA40     | -- |
| ENSG00000253066 | 5.13E-15 | -2.63127 | 1 | 1 RNU6-709P   | -- |
| ENSG00000253067 | 5.13E-15 | -2.63127 | 1 | 1 snoZ6       | -- |
| ENSG00000253068 | 5.13E-15 | -2.63127 | 1 | 1 SNORD112    | -- |
| ENSG00000253069 | 5.13E-15 | -2.63127 | 1 | 1 AC021205.1  | -- |
| ENSG00000253070 | 5.13E-15 | -2.63127 | 1 | 1 RNU6-794P   | -- |
| ENSG00000253071 | 5.13E-15 | -2.63127 | 1 | 1 RNU7-31P    | -- |
| ENSG00000253072 | 5.13E-15 | -2.63127 | 1 | 1 snoMBII-202 | -- |
| ENSG00000253073 | 5.13E-15 | -2.63127 | 1 | 1 RN7SKP295   | -- |
| ENSG00000253074 | 5.13E-15 | -2.63127 | 1 | 1 RNU6-586P   | -- |
| ENSG00000253075 | 5.13E-15 | -2.63127 | 1 | 1 RN7SKP92    | -- |
| ENSG00000253076 | 5.13E-15 | -2.63127 | 1 | 1 SNORD112    | -- |
| ENSG00000253077 | 5.13E-15 | -2.63127 | 1 | 1 RNA5SP169   | -- |
| ENSG00000253078 | 5.13E-15 | -2.63127 | 1 | 1 RNU6-1116P  | -- |
| ENSG00000253079 | 5.13E-15 | -2.63127 | 1 | 1 NRON        | -- |
| ENSG00000253080 | 5.13E-15 | -2.63127 | 1 | 1 RNA5SP373   | -- |
| ENSG00000253081 | 5.13E-15 | -2.63127 | 1 | 1 RNU4ATAC17P | -- |
| ENSG00000253082 | 5.13E-15 | -2.63127 | 1 | 1 AC007365.2  | -- |
| ENSG00000253083 | 5.13E-15 | -2.63127 | 1 | 1 RNA5SP106   | -- |
| ENSG00000253085 | 5.13E-15 | -2.63127 | 1 | 1 SCARNA11    | -- |
| ENSG00000253086 | 5.13E-15 | -2.63127 | 1 | 1 RNU6-537P   | -- |
| ENSG00000253087 | 5.13E-15 | -2.63127 | 1 | 1 RNU6-1174P  | -- |
| ENSG00000253088 | 5.13E-15 | -2.63127 | 1 | 1 Y_RNA       | -- |
| ENSG00000253089 | 5.13E-15 | -2.63127 | 1 | 1 RNU1-104P   | -- |
| ENSG00000253090 | 5.13E-15 | -2.63127 | 1 | 1 SNORA73     | -- |
| ENSG00000253091 | 5.13E-15 | -2.63127 | 1 | 1 U3          | -- |
| ENSG00000253092 | 5.13E-15 | -2.63127 | 1 | 1 SNORA81     | -- |

|                 |          |          |   |                  |        |
|-----------------|----------|----------|---|------------------|--------|
| ENSG00000253093 | 5.13E-15 | -2.63127 | 1 | 1 RNA5SP179      | --     |
| ENSG00000253094 | 5.13E-15 | -2.63127 | 1 | 1 SNORD36        | --     |
| ENSG00000253095 | 5.13E-15 | -2.63127 | 1 | 1 RNU6-676P      | --     |
| ENSG00000253096 | 5.13E-15 | -2.63127 | 1 | 1 Y_RNA          | --     |
| ENSG00000253097 | 5.13E-15 | -2.63127 | 1 | 1 RNU2-19P       | --     |
| ENSG00000253098 | 5.13E-15 | -2.63127 | 1 | 1 RNU7-161P      | --     |
| ENSG00000253099 | 5.13E-15 | -2.63127 | 1 | 1 RNU2-60P       | --     |
| ENSG00000253100 | 5.13E-15 | -2.63127 | 1 | 1 RP11-219J21.1  | --     |
| ENSG00000253102 | 5.13E-15 | -2.63127 | 1 | 1 RP1-117B12.4   | --     |
| ENSG00000253103 | 5.13E-15 | -2.63127 | 1 | 1 RP11-946L20.4  | --     |
| ENSG00000253104 | 5.13E-15 | -2.63127 | 1 | 1 RP11-855C21.1  | --     |
| ENSG00000253105 | 5.13E-15 | -2.63127 | 1 | 1 KB-1448A5.1    | --     |
| ENSG00000253107 | 5.13E-15 | -2.63127 | 1 | 1 CTD-2544L4.1   | K11863 |
| ENSG00000253108 | 5.13E-15 | -2.63127 | 1 | 1 RP1-84O15.2    | --     |
| ENSG00000253109 | 5.13E-15 | -2.63127 | 1 | 1 RP11-619L12.1  | --     |
| ENSG00000253110 | 5.13E-15 | -2.63127 | 1 | 1 CTB-78H18.1    | --     |
| ENSG00000253111 | 5.13E-15 | -2.63127 | 1 | 1 RP11-136O12.2  | --     |
| ENSG00000253114 | 5.13E-15 | -2.63127 | 1 | 1 RP11-550I15.1  | --     |
| ENSG00000253115 | 5.13E-15 | -2.63127 | 1 | 1 RP11-6I2.4     | --     |
| ENSG00000253116 | 5.13E-15 | -2.63127 | 1 | 1 RP11-648L3.2   | --     |
| ENSG00000253117 | 5.13E-15 | -2.63127 | 1 | 1 OC90           | --     |
| ENSG00000253118 | 5.13E-15 | -2.63127 | 1 | 1 RP11-700E23.3  | K03948 |
| ENSG00000253119 | 5.13E-15 | -2.63127 | 1 | 1 HNRNPA3P7      | K12741 |
| ENSG00000253120 | 5.13E-15 | -2.63127 | 1 | 1 IGLV2-34       | K06553 |
| ENSG00000253122 | 5.13E-15 | -2.63127 | 1 | 1 RP11-238I10.1  | --     |
| ENSG00000253123 | 5.13E-15 | -2.63127 | 1 | 1 RP11-527N22.1  | --     |
| ENSG00000253124 | 5.13E-15 | -2.63127 | 1 | 1 TRAPPC2P2      | --     |
| ENSG00000253125 | 5.13E-15 | -2.63127 | 1 | 1 RP11-459E5.1   | --     |
| ENSG00000253126 | 5.13E-15 | -2.63127 | 1 | 1 IGLVI-56       | --     |
| ENSG00000253127 | 5.13E-15 | -2.63127 | 1 | 1 IGKV2D-36      | --     |
| ENSG00000253128 | 5.13E-15 | -2.63127 | 1 | 1 IGHV4-80       | --     |
| ENSG00000253131 | 5.13E-15 | -2.63127 | 1 | 1 IGHV7-56       | --     |
| ENSG00000253132 | 5.13E-15 | -2.63127 | 1 | 1 IGHV3-62       | K06856 |
| ENSG00000253133 | 5.13E-15 | -2.63127 | 1 | 1 RP11-360L9.4   | --     |
| ENSG00000253134 | 5.13E-15 | -2.63127 | 1 | 1 CTC-436K13.2   | --     |
| ENSG00000253135 | 5.13E-15 | -2.63127 | 1 | 1 RP11-589C21.2  | K12755 |
| ENSG00000253137 | 5.13E-15 | -2.63127 | 1 | 1 RP11-509P12.1  | K03061 |
| ENSG00000253138 | 5.13E-15 | -2.63127 | 1 | 1 LINC00967      | --     |
| ENSG00000253139 | 5.13E-15 | -2.63127 | 1 | 1 RP11-17A4.3    | --     |
| ENSG00000253141 | 5.13E-15 | -2.63127 | 1 | 1 CTB-164N12.1   | --     |
| ENSG00000253142 | 5.13E-15 | -2.63127 | 1 | 1 RP11-87E22.1   | --     |
| ENSG00000253143 | 5.13E-15 | -2.63127 | 1 | 1 Metazoa_SRP    | --     |
| ENSG00000253144 | 5.13E-15 | -2.63127 | 1 | 1 RP11-281O15.7  | --     |
| ENSG00000253146 | 5.13E-15 | -2.63127 | 1 | 1 CIR1P1         | K06066 |
| ENSG00000253147 | 5.13E-15 | -2.63127 | 1 | 1 RP11-369E15.4  | --     |
| ENSG00000253148 | 5.13E-15 | -2.63127 | 1 | 1 RGS21          | K16449 |
| ENSG00000253149 | 5.13E-15 | -2.63127 | 1 | 1 IGHVII-31-1    | K06856 |
| ENSG00000253152 | 5.13E-15 | -2.63127 | 1 | 1 IGLV3-17       | --     |
| ENSG00000253155 | 5.13E-15 | -2.63127 | 1 | 1 CTB-47B11.1    | K02898 |
| ENSG00000253156 | 5.13E-15 | -2.63127 | 1 | 1 RP11-58O3.1    | --     |
| ENSG00000253158 | 5.13E-15 | -2.63127 | 1 | 1 IGKV3-31       | --     |
| ENSG00000253159 | 5.13E-15 | -2.63127 | 1 | 1 PCDHGA12       | K16495 |
| ENSG00000253160 | 5.13E-15 | -2.63127 | 1 | 1 RP11-1113C11.2 | --     |
| ENSG00000253161 | 5.13E-15 | -2.63127 | 1 | 1 RP11-150O12.1  | --     |
| ENSG00000253162 | 5.13E-15 | -2.63127 | 1 | 1 RP11-279L11.1  | --     |
| ENSG00000253163 | 5.13E-15 | -2.63127 | 1 | 1 RP11-443C10.1  | --     |
| ENSG00000253164 | 5.13E-15 | -2.63127 | 1 | 1 RP11-563N12.2  | --     |
| ENSG00000253165 | 5.13E-15 | -2.63127 | 1 | 1 CTD-2309H9.3   | --     |

|                 |          |          |   |                 |        |
|-----------------|----------|----------|---|-----------------|--------|
| ENSG00000253166 | 5.13E-15 | -2.63127 | 1 | 1 RP11-585F1.6  | -      |
| ENSG00000253168 | 5.13E-15 | -2.63127 | 1 | 1 RP11-326L2.1  | -      |
| ENSG00000253169 | 5.13E-15 | -2.63127 | 1 | 1 IGHVII-65-1   | -      |
| ENSG00000253171 | 5.13E-15 | -2.63127 | 1 | 1 CTB-118P15.2  | -      |
| ENSG00000253172 | 5.13E-15 | -2.63127 | 1 | 1 CTC-209H22.3  | -      |
| ENSG00000253173 | 5.13E-15 | -2.63127 | 1 | 1 RP11-152C15.1 | K11251 |
| ENSG00000253177 | 5.13E-15 | -2.63127 | 1 | 1 RP11-100L22.1 | -      |
| ENSG00000253178 | 5.13E-15 | -2.63127 | 1 | 1 RP11-404E12.1 | K02126 |
| ENSG00000253179 | 5.13E-15 | -2.63127 | 1 | 1 CALCP         | K12332 |
| ENSG00000253181 | 5.13E-15 | -2.63127 | 1 | 1 RP11-863K10.2 | -      |
| ENSG00000253182 | 5.13E-15 | -2.63127 | 1 | 1 RP11-486M23.2 | -      |
| ENSG00000253183 | 5.13E-15 | -2.63127 | 1 | 1 RP4-701O16.5  | K09560 |
| ENSG00000253184 | 5.13E-15 | -2.63127 | 1 | 1 RP11-13N12.2  | -      |
| ENSG00000253186 | 5.13E-15 | -2.63127 | 1 | 1 RP11-726G23.3 | -      |
| ENSG00000253188 | 5.13E-15 | -2.63127 | 1 | 1 TRBV6-7       | -      |
| ENSG00000253189 | 5.13E-15 | -2.63127 | 1 | 1 RP11-158A14.1 | -      |
| ENSG00000253190 | 5.13E-15 | -2.63127 | 1 | 1 AC084082.3    | -      |
| ENSG00000253191 | 5.13E-15 | -2.63127 | 1 | 1 IGKV1D-32     | -      |
| ENSG00000253193 | 5.13E-15 | -2.63127 | 1 | 1 FCGR1C        | K06498 |
| ENSG00000253195 | 5.13E-15 | -2.63127 | 1 | 1 RP11-359P18.6 | K17728 |
| ENSG00000253196 | 5.13E-15 | -2.63127 | 1 | 1 RP11-706C16.7 | -      |
| ENSG00000253198 | 5.13E-15 | -2.63127 | 1 | 1 RP11-643N23.1 | -      |
| ENSG00000253199 | 5.13E-15 | -2.63127 | 1 | 1 RP11-421P23.1 | -      |
| ENSG00000253202 | 5.13E-15 | -2.63127 | 1 | 1 IGKV3-25      | -      |
| ENSG00000253204 | 5.13E-15 | -2.63127 | 1 | 1 RP5-1009N12.1 | K17920 |
| ENSG00000253205 | 5.13E-15 | -2.63127 | 1 | 1 CTD-3046C4.1  | -      |
| ENSG00000253206 | 5.13E-15 | -2.63127 | 1 | 1 RP11-738G5.2  | -      |
| ENSG00000253207 | 5.13E-15 | -2.63127 | 1 | 1 RP11-67H2.1   | -      |
| ENSG00000253208 | 5.13E-15 | -2.63127 | 1 | 1 RP11-1G11.2   | K06697 |
| ENSG00000253209 | 5.13E-15 | -2.63127 | 1 | 1 IGHV3-65      | K06856 |
| ENSG00000253215 | 5.13E-15 | -2.63127 | 1 | 1 RP11-156K13.2 | -      |
| ENSG00000253216 | 5.13E-15 | -2.63127 | 1 | 1 RP11-744J10.2 | -      |
| ENSG00000253218 | 5.13E-15 | -2.63127 | 1 | 1 KLF3P1        | K15605 |
| ENSG00000253219 | 5.13E-15 | -2.63127 | 1 | 1 KRT18P41      | K07604 |
| ENSG00000253220 | 5.13E-15 | -2.63127 | 1 | 1 RP11-103H7.2  | -      |
| ENSG00000253222 | 5.13E-15 | -2.63127 | 1 | 1 NRG1-IT2      | -      |
| ENSG00000253223 | 5.13E-15 | -2.63127 | 1 | 1 RP11-409C19.2 | K12843 |
| ENSG00000253224 | 5.13E-15 | -2.63127 | 1 | 1 PGAM5P1       | K15637 |
| ENSG00000253225 | 5.13E-15 | -2.63127 | 1 | 1 RP11-1057N3.2 | -      |
| ENSG00000253226 | 5.13E-15 | -2.63127 | 1 | 1 HAUS1P3       | K16584 |
| ENSG00000253230 | 5.13E-15 | -2.63127 | 1 | 1 LINC00599     | -      |
| ENSG00000253231 | 5.13E-15 | -2.63127 | 1 | 1 COX6CP8       | K02268 |
| ENSG00000253232 | 5.13E-15 | -2.63127 | 1 | 1 RP11-359B20.5 | K05764 |
| ENSG00000253233 | 5.13E-15 | -2.63127 | 1 | 1 KB-1582A10.2  | K06672 |
| ENSG00000253234 | 5.13E-15 | -2.63127 | 1 | 1 IGLV2-5       | -      |
| ENSG00000253235 | 5.13E-15 | -2.63127 | 1 | 1 RP11-434I12.4 | -      |
| ENSG00000253236 | 5.13E-15 | -2.63127 | 1 | 1 CTD-2313P7.1  | -      |
| ENSG00000253237 | 5.13E-15 | -2.63127 | 1 | 1 RP11-775E10.1 | -      |
| ENSG00000253238 | 5.13E-15 | -2.63127 | 1 | 1 RP11-941H19.3 | -      |
| ENSG00000253239 | 5.13E-15 | -2.63127 | 1 | 1 IGLVI-70      | -      |
| ENSG00000253240 | 5.13E-15 | -2.63127 | 1 | 1 IGHV3-36      | K06856 |
| ENSG00000253241 | 5.13E-15 | -2.63127 | 1 | 1 IGHV3-50      | -      |
| ENSG00000253242 | 5.13E-15 | -2.63127 | 1 | 1 IGLVIV-64     | K06553 |
| ENSG00000253244 | 5.13E-15 | -2.63127 | 1 | 1 RP11-619L12.3 | -      |
| ENSG00000253245 | 5.13E-15 | -2.63127 | 1 | 1 MTND1P36      | -      |
| ENSG00000253247 | 5.13E-15 | -2.63127 | 1 | 1 IGHV3-76      | K06856 |
| ENSG00000253248 | 5.13E-15 | -2.63127 | 1 | 1 RP11-149P24.1 | -      |
| ENSG00000253250 | 5.13E-15 | -2.63127 | 1 | 1 C8orf88       | -      |

|                 |          |          |   |                  |        |
|-----------------|----------|----------|---|------------------|--------|
| ENSG00000253252 | 5.13E-15 | -2.63127 | 1 | 1 RP11-10A14.6   | --     |
| ENSG00000253257 | 5.13E-15 | -2.63127 | 1 | 1 MTND4P7        | --     |
| ENSG00000253259 | 5.13E-15 | -2.63127 | 1 | 1 RP11-737F9.2   | --     |
| ENSG00000253260 | 5.13E-15 | -2.63127 | 1 | 1 RP11-379I19.1  | --     |
| ENSG00000253261 | 5.13E-15 | -2.63127 | 1 | 1 CTC-280C13.1   | --     |
| ENSG00000253262 | 5.13E-15 | -2.63127 | 1 | 1 RP11-221H10.1  | K02896 |
| ENSG00000253263 | 5.13E-15 | -2.63127 | 1 | 1 KB-1507C5.3    | --     |
| ENSG00000253264 | 5.13E-15 | -2.63127 | 1 | 1 PCAT2          | --     |
| ENSG00000253265 | 5.13E-15 | -2.63127 | 1 | 1 IGKV2-14       | --     |
| ENSG00000253266 | 5.13E-15 | -2.63127 | 1 | 1 RP11-128L5.1   | --     |
| ENSG00000253267 | 5.13E-15 | -2.63127 | 1 | 1 RP11-666I19.2  | --     |
| ENSG00000253269 | 5.13E-15 | -2.63127 | 1 | 1 CTB-37A13.1    | --     |
| ENSG00000253271 | 5.13E-15 | -2.63127 | 1 | 1 RP11-1059L18.1 | K11256 |
| ENSG00000253274 | 5.13E-15 | -2.63127 | 1 | 1 IGHV1-67       | --     |
| ENSG00000253275 | 5.13E-15 | -2.63127 | 1 | 1 RP11-566H8.1   | --     |
| ENSG00000253278 | 5.13E-15 | -2.63127 | 1 | 1 IGKV2-10       | --     |
| ENSG00000253279 | 5.13E-15 | -2.63127 | 1 | 1 FAM183CP       | --     |
| ENSG00000253280 | 5.13E-15 | -2.63127 | 1 | 1 RP11-618M23.4  | --     |
| ENSG00000253281 | 5.13E-15 | -2.63127 | 1 | 1 RP11-716D16.1  | --     |
| ENSG00000253282 | 5.13E-15 | -2.63127 | 1 | 1 KB-1410C5.3    | --     |
| ENSG00000253283 | 5.13E-15 | -2.63127 | 1 | 1 RP11-146E23.2  | K13870 |
| ENSG00000253286 | 5.13E-15 | -2.63127 | 1 | 1 CTD-2552K11.2  | --     |
| ENSG00000253287 | 5.13E-15 | -2.63127 | 1 | 1 RP11-281N10.1  | --     |
| ENSG00000253288 | 5.13E-15 | -2.63127 | 1 | 1 RP11-238K6.1   | --     |
| ENSG00000253290 | 5.13E-15 | -2.63127 | 1 | 1 RP11-597M17.3  | --     |
| ENSG00000253291 | 5.13E-15 | -2.63127 | 1 | 1 TRBV7-7        | K10785 |
| ENSG00000253292 | 5.13E-15 | -2.63127 | 1 | 1 RP11-298P6.5   | K00469 |
| ENSG00000253294 | 5.13E-15 | -2.63127 | 1 | 1 IGHVII-40-1    | --     |
| ENSG00000253297 | 5.13E-15 | -2.63127 | 1 | 1 HTR4-IT1       | --     |
| ENSG00000253298 | 5.13E-15 | -2.63127 | 1 | 1 AC008703.1     | --     |
| ENSG00000253299 | 5.13E-15 | -2.63127 | 1 | 1 RP11-316J7.4   | K12162 |
| ENSG00000253300 | 5.13E-15 | -2.63127 | 1 | 1 RP11-108E14.1  | --     |
| ENSG00000253301 | 5.13E-15 | -2.63127 | 1 | 1 RP11-513O17.2  | --     |
| ENSG00000253303 | 5.13E-15 | -2.63127 | 1 | 1 IGHVIII-82     | --     |
| ENSG00000253308 | 5.13E-15 | -2.63127 | 1 | 1 RP1-170O19.17  | --     |
| ENSG00000253310 | 5.13E-15 | -2.63127 | 1 | 1 IGHVIII-76-1   | --     |
| ENSG00000253311 | 5.13E-15 | -2.63127 | 1 | 1 AC011343.1     | --     |
| ENSG00000253312 | 5.13E-15 | -2.63127 | 1 | 1 RP11-359P18.2  | --     |
| ENSG00000253313 | 5.13E-15 | -2.63127 | 1 | 1 C1orf210       | --     |
| ENSG00000253314 | 5.13E-15 | -2.63127 | 1 | 1 LINC00293      | --     |
| ENSG00000253315 | 5.13E-15 | -2.63127 | 1 | 1 CTB-11I22.2    | --     |
| ENSG00000253317 | 5.13E-15 | -2.63127 | 1 | 1 RP11-142A23.1  | --     |
| ENSG00000253318 | 5.13E-15 | -2.63127 | 1 | 1 TMCC1P1        | --     |
| ENSG00000253319 | 5.13E-15 | -2.63127 | 1 | 1 RP11-359P18.8  | --     |
| ENSG00000253322 | 5.13E-15 | -2.63127 | 1 | 1 RP11-388G22.1  | --     |
| ENSG00000253325 | 5.13E-15 | -2.63127 | 1 | 1 IGHV7-34-1     | --     |
| ENSG00000253326 | 5.13E-15 | -2.63127 | 1 | 1 RP11-261C10.7  | --     |
| ENSG00000253329 | 5.13E-15 | -2.63127 | 1 | 1 IGLV3-30       | --     |
| ENSG00000253331 | 5.13E-15 | -2.63127 | 1 | 1 CTC-207P7.1    | --     |
| ENSG00000253332 | 5.13E-15 | -2.63127 | 1 | 1 KB-1582A10.1   | K02936 |
| ENSG00000253333 | 5.13E-15 | -2.63127 | 1 | 1 RP11-497H16.8  | K01195 |
| ENSG00000253335 | 5.13E-15 | -2.63127 | 1 | 1 RP11-420B22.1  | --     |
| ENSG00000253336 | 5.13E-15 | -2.63127 | 1 | 1 RP11-468O2.1   | K12405 |
| ENSG00000253338 | 5.13E-15 | -2.63127 | 1 | 1 IGLV3-29       | --     |
| ENSG00000253339 | 5.13E-15 | -2.63127 | 1 | 1 RP11-434I12.3  | --     |
| ENSG00000253340 | 5.13E-15 | -2.63127 | 1 | 1 RP11-139G7.1   | K18269 |
| ENSG00000253342 | 5.13E-15 | -2.63127 | 1 | 1 RP11-219J21.2  | --     |
| ENSG00000253343 | 5.13E-15 | -2.63127 | 1 | 1 CTD-3023L14.3  | --     |

|                 |          |          |   |                  |        |
|-----------------|----------|----------|---|------------------|--------|
| ENSG00000253344 | 5.13E-15 | -2.63127 | 1 | 1 RP11-346L1.2   | -      |
| ENSG00000253345 | 5.13E-15 | -2.63127 | 1 | 1 IGHVII-22-1    | -      |
| ENSG00000253346 | 5.13E-15 | -2.63127 | 1 | 1 CTD-3107M8.1   | K03123 |
| ENSG00000253348 | 5.13E-15 | -2.63127 | 1 | 1 MIR4454        | -      |
| ENSG00000253349 | 5.13E-15 | -2.63127 | 1 | 1 COX6B1P6       | -      |
| ENSG00000253350 | 5.13E-15 | -2.63127 | 1 | 1 RP11-127H5.1   | K17442 |
| ENSG00000253351 | 5.13E-15 | -2.63127 | 1 | 1 KB-1047C11.1   | -      |
| ENSG00000253354 | 5.13E-15 | -2.63127 | 1 | 1 CTA-392C11.2   | -      |
| ENSG00000253355 | 5.13E-15 | -2.63127 | 1 | 1 KB-1460A1.2    | -      |
| ENSG00000253357 | 5.13E-15 | -2.63127 | 1 | 1 CTB-78F1.2     | -      |
| ENSG00000253358 | 5.13E-15 | -2.63127 | 1 | 1 GS1-251I9.3    | -      |
| ENSG00000253359 | 5.13E-15 | -2.63127 | 1 | 1 IGHV3-37       | -      |
| ENSG00000253361 | 5.13E-15 | -2.63127 | 1 | 1 RP11-675F6.3   | -      |
| ENSG00000253362 | 5.13E-15 | -2.63127 | 1 | 1 RP11-120I21.3  | K09290 |
| ENSG00000253363 | 5.13E-15 | -2.63127 | 1 | 1 RP11-962G15.1  | -      |
| ENSG00000253364 | 5.13E-15 | -2.63127 | 1 | 1 RP11-731F5.2   | -      |
| ENSG00000253365 | 5.13E-15 | -2.63127 | 1 | 1 IGKV1D-22      | -      |
| ENSG00000253367 | 5.13E-15 | -2.63127 | 1 | 1 IGHVIII-25-1   | -      |
| ENSG00000253369 | 5.13E-15 | -2.63127 | 1 | 1 RP11-1081M5.1  | -      |
| ENSG00000253370 | 5.13E-15 | -2.63127 | 1 | 1 CTB-56J15.1    | -      |
| ENSG00000253371 | 5.13E-15 | -2.63127 | 1 | 1 RP11-587H10.1  | -      |
| ENSG00000253372 | 5.13E-15 | -2.63127 | 1 | 1 RP11-44N11.1   | -      |
| ENSG00000253373 | 5.13E-15 | -2.63127 | 1 | 1 RP11-21C17.1   | -      |
| ENSG00000253374 | 5.13E-15 | -2.63127 | 1 | 1 RP11-257P3.3   | -      |
| ENSG00000253376 | 5.13E-15 | -2.63127 | 1 | 1 RP11-44D19.1   | -      |
| ENSG00000253377 | 5.13E-15 | -2.63127 | 1 | 1 RP11-566H8.3   | -      |
| ENSG00000253379 | 5.13E-15 | -2.63127 | 1 | 1 RP11-1102P16.1 | -      |
| ENSG00000253380 | 5.13E-15 | -2.63127 | 1 | 1 RP11-738G5.1   | -      |
| ENSG00000253381 | 5.13E-15 | -2.63127 | 1 | 1 RP11-359E19.1  | -      |
| ENSG00000253382 | 5.13E-15 | -2.63127 | 1 | 1 POU5F1P2       | K09367 |
| ENSG00000253383 | 5.13E-15 | -2.63127 | 1 | 1 RP11-116B19.2  | K02920 |
| ENSG00000253385 | 5.13E-15 | -2.63127 | 1 | 1 KB-1254G8.1    | -      |
| ENSG00000253386 | 5.13E-15 | -2.63127 | 1 | 1 IGHVII-49-1    | -      |
| ENSG00000253387 | 5.13E-15 | -2.63127 | 1 | 1 IGHVIII-5-1    | -      |
| ENSG00000253388 | 5.13E-15 | -2.63127 | 1 | 1 RP11-150O12.2  | -      |
| ENSG00000253389 | 5.13E-15 | -2.63127 | 1 | 1 RP11-930P14.1  | -      |
| ENSG00000253391 | 5.13E-15 | -2.63127 | 1 | 1 RP11-758H6.1   | -      |
| ENSG00000253393 | 5.13E-15 | -2.63127 | 1 | 1 RANP9          | -      |
| ENSG00000253394 | 5.13E-15 | -2.63127 | 1 | 1 LINC00534      | -      |
| ENSG00000253396 | 5.13E-15 | -2.63127 | 1 | 1 RP11-15G16.1   | -      |
| ENSG00000253399 | 5.13E-15 | -2.63127 | 1 | 1 AC078852.2     | -      |
| ENSG00000253400 | 5.13E-15 | -2.63127 | 1 | 1 RP11-337A23.6  | -      |
| ENSG00000253401 | 5.13E-15 | -2.63127 | 1 | 1 AF121898.2     | K12199 |
| ENSG00000253403 | 5.13E-15 | -2.63127 | 1 | 1 RP11-348M17.2  | -      |
| ENSG00000253405 | 5.13E-15 | -2.63127 | 1 | 1 EVX1-AS        | -      |
| ENSG00000253406 | 5.13E-15 | -2.63127 | 1 | 1 AC012613.2     | -      |
| ENSG00000253407 | 5.13E-15 | -2.63127 | 1 | 1 RP11-381I15.1  | -      |
| ENSG00000253408 | 5.13E-15 | -2.63127 | 1 | 1 RP11-231D20.2  | -      |
| ENSG00000253409 | 5.13E-15 | -2.63127 | 1 | 1 TRBV7-4        | K10785 |
| ENSG00000253410 | 5.13E-15 | -2.63127 | 1 | 1 RP11-539E17.3  | -      |
| ENSG00000253412 | 5.13E-15 | -2.63127 | 1 | 1 IGHVIII-13-1   | -      |
| ENSG00000253413 | 5.13E-15 | -2.63127 | 1 | 1 RP11-960H2.2   | -      |
| ENSG00000253414 | 5.13E-15 | -2.63127 | 1 | 1 RP11-150O12.6  | -      |
| ENSG00000253415 | 5.13E-15 | -2.63127 | 1 | 1 RP11-44N12.4   | K13187 |
| ENSG00000253416 | 5.13E-15 | -2.63127 | 1 | 1 RP11-48D4.2    | -      |
| ENSG00000253417 | 5.13E-15 | -2.63127 | 1 | 1 RP11-109J4.1   | -      |
| ENSG00000253418 | 5.13E-15 | -2.63127 | 1 | 1 SNX18P27       | K17923 |
| ENSG00000253420 | 5.13E-15 | -2.63127 | 1 | 1 RP11-642D21.2  | -      |

|                 |          |          |   |                 |        |
|-----------------|----------|----------|---|-----------------|--------|
| ENSG00000253421 | 5.13E-15 | -2.63127 | 1 | 1 ZNHIT1P1      | K11663 |
| ENSG00000253422 | 5.13E-15 | -2.63127 | 1 | 1 CTB-47B8.4    | -      |
| ENSG00000253423 | 5.13E-15 | -2.63127 | 1 | 1 RP11-813B8.1  | K00387 |
| ENSG00000253424 | 5.13E-15 | -2.63127 | 1 | 1 CTC-436K13.3  | -      |
| ENSG00000253425 | 5.13E-15 | -2.63127 | 1 | 1 HSPA8P13      | -      |
| ENSG00000253426 | 5.13E-15 | -2.63127 | 1 | 1 RP11-10A14.4  | -      |
| ENSG00000253427 | 5.13E-15 | -2.63127 | 1 | 1 RP11-103H7.1  | -      |
| ENSG00000253428 | 5.13E-15 | -2.63127 | 1 | 1 CTB-43E15.2   | -      |
| ENSG00000253429 | 5.13E-15 | -2.63127 | 1 | 1 KB-1090H4.2   | -      |
| ENSG00000253430 | 5.13E-15 | -2.63127 | 1 | 1 RP11-14I17.2  | -      |
| ENSG00000253431 | 5.13E-15 | -2.63127 | 1 | 1 RP11-442A17.2 | K08831 |
| ENSG00000253432 | 5.13E-15 | -2.63127 | 1 | 1 RP11-324F11.1 | -      |
| ENSG00000253434 | 5.13E-15 | -2.63127 | 1 | 1 RP11-1101K5.1 | -      |
| ENSG00000253435 | 5.13E-15 | -2.63127 | 1 | 1 IGKV2-4       | -      |
| ENSG00000253437 | 5.13E-15 | -2.63127 | 1 | 1 RP11-90P5.4   | -      |
| ENSG00000253439 | 5.13E-15 | -2.63127 | 1 | 1 CDC42P5       | K04393 |
| ENSG00000253440 | 5.13E-15 | -2.63127 | 1 | 1 IGHV3-33-2    | -      |
| ENSG00000253441 | 5.13E-15 | -2.63127 | 1 | 1 IGHV3-25      | K06856 |
| ENSG00000253444 | 5.13E-15 | -2.63127 | 1 | 1 AC133633.2    | -      |
| ENSG00000253445 | 5.13E-15 | -2.63127 | 1 | 1 CTB-79E8.2    | -      |
| ENSG00000253447 | 5.13E-15 | -2.63127 | 1 | 1 RP11-619L12.4 | -      |
| ENSG00000253448 | 5.13E-15 | -2.63127 | 1 | 1 IGLV3-6       | -      |
| ENSG00000253449 | 5.13E-15 | -2.63127 | 1 | 1 CTC-436K13.6  | -      |
| ENSG00000253451 | 5.13E-15 | -2.63127 | 1 | 1 IGLV2-28      | K06553 |
| ENSG00000253452 | 5.13E-15 | -2.63127 | 1 | 1 RP11-473J6.1  | -      |
| ENSG00000253454 | 5.13E-15 | -2.63127 | 1 | 1 NDUFA5P2      | K03949 |
| ENSG00000253455 | 5.13E-15 | -2.63127 | 1 | 1 RP11-770E5.3  | -      |
| ENSG00000253458 | 5.13E-15 | -2.63127 | 1 | 1 IGHVII-15-1   | -      |
| ENSG00000253460 | 5.13E-15 | -2.63127 | 1 | 1 IGKV2OR22-3   | -      |
| ENSG00000253461 | 5.13E-15 | -2.63127 | 1 | 1 IGKV1-35      | -      |
| ENSG00000253462 | 5.13E-15 | -2.63127 | 1 | 1 IGHVIII-26-1  | -      |
| ENSG00000253464 | 5.13E-15 | -2.63127 | 1 | 1 IGHV3-29      | -      |
| ENSG00000253465 | 5.13E-15 | -2.63127 | 1 | 1 IGHVIV-44-1   | -      |
| ENSG00000253467 | 5.13E-15 | -2.63127 | 1 | 1 IGHV7-40      | K06856 |
| ENSG00000253468 | 5.13E-15 | -2.63127 | 1 | 1 KB-1517D11.2  | K18463 |
| ENSG00000253469 | 5.13E-15 | -2.63127 | 1 | 1 CTC-264O10.1  | -      |
| ENSG00000253470 | 5.13E-15 | -2.63127 | 1 | 1 RP11-697B24.1 | -      |
| ENSG00000253471 | 5.13E-15 | -2.63127 | 1 | 1 RP11-175E9.1  | -      |
| ENSG00000253472 | 5.13E-15 | -2.63127 | 1 | 1 CTB-23I7.2    | K15164 |
| ENSG00000253474 | 5.13E-15 | -2.63127 | 1 | 1 RP11-10H3.1   | -      |
| ENSG00000253475 | 5.13E-15 | -2.63127 | 1 | 1 RP11-110G21.2 | -      |
| ENSG00000253477 | 5.13E-15 | -2.63127 | 1 | 1 RP11-1C8.4    | -      |
| ENSG00000253479 | 5.13E-15 | -2.63127 | 1 | 1 RP11-744J10.3 | -      |
| ENSG00000253480 | 5.13E-15 | -2.63127 | 1 | 1 RP11-39H3.1   | -      |
| ENSG00000253481 | 5.13E-15 | -2.63127 | 1 | 1 IGKV1OR22-1   | -      |
| ENSG00000253482 | 5.13E-15 | -2.63127 | 1 | 1 IGHVII-26-2   | K06856 |
| ENSG00000253484 | 5.13E-15 | -2.63127 | 1 | 1 RP11-109P6.2  | -      |
| ENSG00000253486 | 5.13E-15 | -2.63127 | 1 | 1 RP11-726G23.7 | -      |
| ENSG00000253487 | 5.13E-15 | -2.63127 | 1 | 1 IGKV2-36      | -      |
| ENSG00000253488 | 5.13E-15 | -2.63127 | 1 | 1 RP11-583M2.2  | -      |
| ENSG00000253489 | 5.13E-15 | -2.63127 | 1 | 1 RP11-114O8.1  | -      |
| ENSG00000253490 | 5.13E-15 | -2.63127 | 1 | 1 AC145110.1    | -      |
| ENSG00000253491 | 5.13E-15 | -2.63127 | 1 | 1 IGHVII-30-1   | -      |
| ENSG00000253492 | 5.13E-15 | -2.63127 | 1 | 1 CDH12P3       | K06804 |
| ENSG00000253493 | 5.13E-15 | -2.63127 | 1 | 1 RP11-89A16.1  | -      |
| ENSG00000253495 | 5.13E-15 | -2.63127 | 1 | 1 RP11-99I9.2   | K08738 |
| ENSG00000253496 | 5.13E-15 | -2.63127 | 1 | 1 RP11-13N12.1  | -      |
| ENSG00000253497 | 5.13E-15 | -2.63127 | 1 | 1 IGKV1-13      | -      |

|                 |          |          |   |                  |        |
|-----------------|----------|----------|---|------------------|--------|
| ENSG00000253501 | 5.13E-15 | -2.63127 | 1 | 1 IGKV3D-34      | -      |
| ENSG00000253502 | 5.13E-15 | -2.63127 | 1 | 1 ATP6V1G1P2     | K02152 |
| ENSG00000253503 | 5.13E-15 | -2.63127 | 1 | 1 RP11-653B10.1  | -      |
| ENSG00000253504 | 5.13E-15 | -2.63127 | 1 | 1 RP11-593P24.2  | K00412 |
| ENSG00000253505 | 5.13E-15 | -2.63127 | 1 | 1 CTA-398F10.1   | -      |
| ENSG00000253506 | 5.13E-15 | -2.63127 | 1 | 1 NACA2          | K03626 |
| ENSG00000253507 | 5.13E-15 | -2.63127 | 1 | 1 CTD-2501M5.1   | -      |
| ENSG00000253509 | 5.13E-15 | -2.63127 | 1 | 1 CTD-3080F16.3  | -      |
| ENSG00000253510 | 5.13E-15 | -2.63127 | 1 | 1 RP5-991O23.1   | -      |
| ENSG00000253512 | 5.13E-15 | -2.63127 | 1 | 1 CTC-535M15.1   | -      |
| ENSG00000253513 | 5.13E-15 | -2.63127 | 1 | 1 RP11-6D1.3     | -      |
| ENSG00000253517 | 5.13E-15 | -2.63127 | 1 | 1 XRCC6P4        | K10884 |
| ENSG00000253519 | 5.13E-15 | -2.63127 | 1 | 1 AC106801.1     | -      |
| ENSG00000253520 | 5.13E-15 | -2.63127 | 1 | 1 RP11-798K23.5  | -      |
| ENSG00000253521 | 5.13E-15 | -2.63127 | 1 | 1 HPYR1          | -      |
| ENSG00000253522 | 5.13E-15 | -2.63127 | 1 | 1 MIR146A        | -      |
| ENSG00000253523 | 5.13E-15 | -2.63127 | 1 | 1 RP11-1112C15.2 | -      |
| ENSG00000253524 | 5.13E-15 | -2.63127 | 1 | 1 RP11-89M20.2   | -      |
| ENSG00000253525 | 5.13E-15 | -2.63127 | 1 | 1 CTD-2114J12.1  | K13624 |
| ENSG00000253526 | 5.13E-15 | -2.63127 | 1 | 1 RP11-152P17.3  | -      |
| ENSG00000253527 | 5.13E-15 | -2.63127 | 1 | 1 CTB-105L4.2    | -      |
| ENSG00000253528 | 5.13E-15 | -2.63127 | 1 | 1 RP11-347C18.4  | -      |
| ENSG00000253530 | 5.13E-15 | -2.63127 | 1 | 1 RP11-103H7.3   | -      |
| ENSG00000253532 | 5.13E-15 | -2.63127 | 1 | 1 CTD-2340D6.1   | -      |
| ENSG00000253534 | 5.13E-15 | -2.63127 | 1 | 1 TRBV6-8        | -      |
| ENSG00000253535 | 5.13E-15 | -2.63127 | 1 | 1 RP11-624C23.1  | -      |
| ENSG00000253536 | 5.13E-15 | -2.63127 | 1 | 1 RP11-1174L13.2 | K08764 |
| ENSG00000253538 | 5.13E-15 | -2.63127 | 1 | 1 CTB-32P11.1    | -      |
| ENSG00000253542 | 5.13E-15 | -2.63127 | 1 | 1 SDR16C6P       | K09228 |
| ENSG00000253543 | 5.13E-15 | -2.63127 | 1 | 1 RP11-89K10.2   | K09228 |
| ENSG00000253544 | 5.13E-15 | -2.63127 | 1 | 1 RP11-705O24.4  | K00731 |
| ENSG00000253545 | 5.13E-15 | -2.63127 | 1 | 1 IGHV3-52       | K06856 |
| ENSG00000253546 | 5.13E-15 | -2.63127 | 1 | 1 IGLVVI-22-1    | -      |
| ENSG00000253547 | 5.13E-15 | -2.63127 | 1 | 1 RP11-959F10.5  | K07374 |
| ENSG00000253548 | 5.13E-15 | -2.63127 | 1 | 1 PYDC2          | K19409 |
| ENSG00000253549 | 5.13E-15 | -2.63127 | 1 | 1 RP11-317J10.2  | -      |
| ENSG00000253550 | 5.13E-15 | -2.63127 | 1 | 1 RP11-115C21.4  | K18532 |
| ENSG00000253551 | 5.13E-15 | -2.63127 | 1 | 1 RP11-26M5.2    | -      |
| ENSG00000253553 | 5.13E-15 | -2.63127 | 1 | 1 RP11-586K2.1   | -      |
| ENSG00000253554 | 5.13E-15 | -2.63127 | 1 | 1 RP11-32K4.1    | -      |
| ENSG00000253555 | 5.13E-15 | -2.63127 | 1 | 1 RP11-16E18.1   | -      |
| ENSG00000253556 | 5.13E-15 | -2.63127 | 1 | 1 KB-1639H6.7    | -      |
| ENSG00000253557 | 5.13E-15 | -2.63127 | 1 | 1 RP11-1080G15.1 | -      |
| ENSG00000253558 | 5.13E-15 | -2.63127 | 1 | 1 CTD-2179L22.1  | K04079 |
| ENSG00000253560 | 5.13E-15 | -2.63127 | 1 | 1 RP11-16P20.2   | K06126 |
| ENSG00000253561 | 5.13E-15 | -2.63127 | 1 | 1 CTD-2588J1.1   | -      |
| ENSG00000253562 | 5.13E-15 | -2.63127 | 1 | 1 CTD-2340D6.2   | -      |
| ENSG00000253563 | 5.13E-15 | -2.63127 | 1 | 1 NKX2-1-AS1     | -      |
| ENSG00000253564 | 5.13E-15 | -2.63127 | 1 | 1 RP11-956J14.2  | K04079 |
| ENSG00000253568 | 5.13E-15 | -2.63127 | 1 | 1 RP11-386D6.3   | K11426 |
| ENSG00000253569 | 5.13E-15 | -2.63127 | 1 | 1 VENTXP5        | -      |
| ENSG00000253571 | 5.13E-15 | -2.63127 | 1 | 1 RP11-728L1.1   | K11317 |
| ENSG00000253572 | 5.13E-15 | -2.63127 | 1 | 1 RP11-107N7.1   | -      |
| ENSG00000253573 | 5.13E-15 | -2.63127 | 1 | 1 RP11-351C8.1   | -      |
| ENSG00000253574 | 5.13E-15 | -2.63127 | 1 | 1 RP11-284H18.1  | -      |
| ENSG00000253576 | 5.13E-15 | -2.63127 | 1 | 1 GS1-5L10.1     | -      |
| ENSG00000253577 | 5.13E-15 | -2.63127 | 1 | 1 RP11-100L22.3  | -      |
| ENSG00000253578 | 5.13E-15 | -2.63127 | 1 | 1 IGKV1-22       | -      |

|                 |          |          |   |                 |        |
|-----------------|----------|----------|---|-----------------|--------|
| ENSG00000253579 | 5.13E-15 | -2.63127 | 1 | 1 SUMO2P16      | --     |
| ENSG00000253580 | 5.13E-15 | -2.63127 | 1 | 1 RP11-790J24.2 | --     |
| ENSG00000253581 | 5.13E-15 | -2.63127 | 1 | 1 CTD-2272D18.2 | --     |
| ENSG00000253583 | 5.13E-15 | -2.63127 | 1 | 1 RP11-573J24.1 | --     |
| ENSG00000253584 | 5.13E-15 | -2.63127 | 1 | 1 CTD-2374C24.1 | --     |
| ENSG00000253585 | 5.13E-15 | -2.63127 | 1 | 1 KB-1184D12.1  | --     |
| ENSG00000253586 | 5.13E-15 | -2.63127 | 1 | 1 RP11-723D22.2 | --     |
| ENSG00000253587 | 5.13E-15 | -2.63127 | 1 | 1 IGHV3-30-2    | --     |
| ENSG00000253588 | 5.13E-15 | -2.63127 | 1 | 1 IGHVIII-44    | --     |
| ENSG00000253590 | 5.13E-15 | -2.63127 | 1 | 1 IGLV3-13      | --     |
| ENSG00000253591 | 5.13E-15 | -2.63127 | 1 | 1 CTC-265N9.1   | --     |
| ENSG00000253592 | 5.13E-15 | -2.63127 | 1 | 1 IGKV2-38      | --     |
| ENSG00000253593 | 5.13E-15 | -2.63127 | 1 | 1 RP11-157E21.1 | --     |
| ENSG00000253596 | 5.13E-15 | -2.63127 | 1 | 1 CTD-2320G14.2 | --     |
| ENSG00000253597 | 5.13E-15 | -2.63127 | 1 | 1 IGHVII-43-1   | --     |
| ENSG00000253600 | 5.13E-15 | -2.63127 | 1 | 1 CTC-340A15.1  | K02958 |
| ENSG00000253602 | 5.13E-15 | -2.63127 | 1 | 1 CTD-3135A9.3  | --     |
| ENSG00000253604 | 5.13E-15 | -2.63127 | 1 | 1 RP11-489E7.1  | --     |
| ENSG00000253605 | 5.13E-15 | -2.63127 | 1 | 1 HNRNPA1P38    | K12741 |
| ENSG00000253606 | 5.13E-15 | -2.63127 | 1 | 1 AFG3L2P1      | K08956 |
| ENSG00000253607 | 5.13E-15 | -2.63127 | 1 | 1 RP11-557C18.3 | --     |
| ENSG00000253610 | 5.13E-15 | -2.63127 | 1 | 1 RP11-139F9.1  | --     |
| ENSG00000253611 | 5.13E-15 | -2.63127 | 1 | 1 VN1R46P       | K04614 |
| ENSG00000253612 | 5.13E-15 | -2.63127 | 1 | 1 WBP1LP3       | --     |
| ENSG00000253613 | 5.13E-15 | -2.63127 | 1 | 1 CTC-551A13.2  | --     |
| ENSG00000253614 | 5.13E-15 | -2.63127 | 1 | 1 RP11-513O17.3 | --     |
| ENSG00000253617 | 5.13E-15 | -2.63127 | 1 | 1 RP11-443C10.3 | --     |
| ENSG00000253619 | 5.13E-15 | -2.63127 | 1 | 1 RP11-369K17.1 | --     |
| ENSG00000253621 | 5.13E-15 | -2.63127 | 1 | 1 RP11-255L13.1 | K02998 |
| ENSG00000253622 | 5.13E-15 | -2.63127 | 1 | 1 RP11-654G14.1 | --     |
| ENSG00000253623 | 5.13E-15 | -2.63127 | 1 | 1 RP11-346I3.2  | K18532 |
| ENSG00000253625 | 5.13E-15 | -2.63127 | 1 | 1 IGKV2-23      | --     |
| ENSG00000253627 | 5.13E-15 | -2.63127 | 1 | 1 RP11-513H8.1  | --     |
| ENSG00000253629 | 5.13E-15 | -2.63127 | 1 | 1 KB-1107E3.1   | --     |
| ENSG00000253630 | 5.13E-15 | -2.63127 | 1 | 1 CTC-370J7.1   | --     |
| ENSG00000253631 | 5.13E-15 | -2.63127 | 1 | 1 IGLV7-35      | --     |
| ENSG00000253632 | 5.13E-15 | -2.63127 | 1 | 1 RP11-486M23.1 | --     |
| ENSG00000253634 | 5.13E-15 | -2.63127 | 1 | 1 RP11-587H10.2 | --     |
| ENSG00000253635 | 5.13E-15 | -2.63127 | 1 | 1 IGHVIII-67-3  | --     |
| ENSG00000253637 | 5.13E-15 | -2.63127 | 1 | 1 IGLVV-58      | --     |
| ENSG00000253638 | 5.13E-15 | -2.63127 | 1 | 1 CTC-369M3.1   | --     |
| ENSG00000253639 | 5.13E-15 | -2.63127 | 1 | 1 SUMO2P18      | K12160 |
| ENSG00000253640 | 5.13E-15 | -2.63127 | 1 | 1 CTD-2281E23.1 | --     |
| ENSG00000253641 | 5.13E-15 | -2.63127 | 1 | 1 RP11-981G7.2  | --     |
| ENSG00000253642 | 5.13E-15 | -2.63127 | 1 | 1 RP11-317N12.1 | --     |
| ENSG00000253643 | 5.13E-15 | -2.63127 | 1 | 1 RP11-561E1.1  | --     |
| ENSG00000253644 | 5.13E-15 | -2.63127 | 1 | 1 KB-1930G5.3   | --     |
| ENSG00000253645 | 5.13E-15 | -2.63127 | 1 | 1 CTD-2544N14.3 | --     |
| ENSG00000253646 | 5.13E-15 | -2.63127 | 1 | 1 CTD-2311A18.1 | K02934 |
| ENSG00000253647 | 5.13E-15 | -2.63127 | 1 | 1 CTD-2270F17.1 | --     |
| ENSG00000253648 | 5.13E-15 | -2.63127 | 1 | 1 RP11-77B22.2  | --     |
| ENSG00000253649 | 5.13E-15 | -2.63127 | 1 | 1 PRSS51        | --     |
| ENSG00000253650 | 5.13E-15 | -2.63127 | 1 | 1 SMARCE1P4     | K11651 |
| ENSG00000253651 | 5.13E-15 | -2.63127 | 1 | 1 SOD1P3        | K04565 |
| ENSG00000253652 | 5.13E-15 | -2.63127 | 1 | 1 RP11-798K23.4 | --     |
| ENSG00000253653 | 5.13E-15 | -2.63127 | 1 | 1 CTC-248O19.1  | --     |
| ENSG00000253654 | 5.13E-15 | -2.63127 | 1 | 1 CTD-2210A23.1 | K01823 |
| ENSG00000253655 | 5.13E-15 | -2.63127 | 1 | 1 IGJP1         | --     |



|                 |          |          |   |                  |        |
|-----------------|----------|----------|---|------------------|--------|
| ENSG00000253656 | 5.13E-15 | -2.63127 | 1 | 1 KB-1568E2.1    | -      |
| ENSG00000253657 | 5.13E-15 | -2.63127 | 1 | 1 RP11-25P11.2   | K09512 |
| ENSG00000253658 | 5.13E-15 | -2.63127 | 1 | 1 RP11-600K15.1  | -      |
| ENSG00000253659 | 5.13E-15 | -2.63127 | 1 | 1 RP11-1114I9.1  | -      |
| ENSG00000253661 | 5.13E-15 | -2.63127 | 1 | 1 ZFHX4-AS1      | -      |
| ENSG00000253663 | 5.13E-15 | -2.63127 | 1 | 1 NPM1P52        | K11276 |
| ENSG00000253664 | 5.13E-15 | -2.63127 | 1 | 1 RP11-401H2.1   | -      |
| ENSG00000253665 | 5.13E-15 | -2.63127 | 1 | 1 RP11-359E19.2  | -      |
| ENSG00000253668 | 5.13E-15 | -2.63127 | 1 | 1 RP11-463C14.1  | -      |
| ENSG00000253670 | 5.13E-15 | -2.63127 | 1 | 1 RP11-429O2.1   | -      |
| ENSG00000253672 | 5.13E-15 | -2.63127 | 1 | 1 RP11-536K17.1  | -      |
| ENSG00000253673 | 5.13E-15 | -2.63127 | 1 | 1 CTC-436K13.1   | -      |
| ENSG00000253674 | 5.13E-15 | -2.63127 | 1 | 1 IGHVII-78-1    | K06856 |
| ENSG00000253675 | 5.13E-15 | -2.63127 | 1 | 1 CTD-3118D11.2  | -      |
| ENSG00000253677 | 5.13E-15 | -2.63127 | 1 | 1 UBE2HP1        | K10576 |
| ENSG00000253678 | 5.13E-15 | -2.63127 | 1 | 1 RP11-981G7.3   | -      |
| ENSG00000253679 | 5.13E-15 | -2.63127 | 1 | 1 KB-1410C5.2    | -      |
| ENSG00000253680 | 5.13E-15 | -2.63127 | 1 | 1 RP11-59O2.1    | K03372 |
| ENSG00000253681 | 5.13E-15 | -2.63127 | 1 | 1 RP11-115I9.1   | -      |
| ENSG00000253682 | 5.13E-15 | -2.63127 | 1 | 1 RP11-700E23.2  | -      |
| ENSG00000253684 | 5.13E-15 | -2.63127 | 1 | 1 RP11-10D7.2    | -      |
| ENSG00000253685 | 5.13E-15 | -2.63127 | 1 | 1 RP11-593P24.3  | -      |
| ENSG00000253687 | 5.13E-15 | -2.63127 | 1 | 1 CTC-348L5.1    | -      |
| ENSG00000253688 | 5.13E-15 | -2.63127 | 1 | 1 RP11-567J20.2  | -      |
| ENSG00000253689 | 5.13E-15 | -2.63127 | 1 | 1 IGHV3-54       | -      |
| ENSG00000253690 | 5.13E-15 | -2.63127 | 1 | 1 RP11-380I10.4  | -      |
| ENSG00000253691 | 5.13E-15 | -2.63127 | 1 | 1 IGKV2OR22-4    | -      |
| ENSG00000253692 | 5.13E-15 | -2.63127 | 1 | 1 IGHEP1         | -      |
| ENSG00000253693 | 5.13E-15 | -2.63127 | 1 | 1 CTC-535M15.2   | -      |
| ENSG00000253695 | 5.13E-15 | -2.63127 | 1 | 1 RP11-177H2.2   | -      |
| ENSG00000253696 | 5.13E-15 | -2.63127 | 1 | 1 KBTBD11-OT1    | -      |
| ENSG00000253697 | 5.13E-15 | -2.63127 | 1 | 1 RP11-1081K18.1 | K08789 |
| ENSG00000253698 | 5.13E-15 | -2.63127 | 1 | 1 RP11-1259L22.1 | -      |
| ENSG00000253699 | 5.13E-15 | -2.63127 | 1 | 1 CTD-3118D11.3  | -      |
| ENSG00000253701 | 5.13E-15 | -2.63127 | 1 | 1 AL928768.3     | -      |
| ENSG00000253702 | 5.13E-15 | -2.63127 | 1 | 1 RP11-567J20.1  | -      |
| ENSG00000253703 | 5.13E-15 | -2.63127 | 1 | 1 IGHV1-68       | -      |
| ENSG00000253705 | 5.13E-15 | -2.63127 | 1 | 1 IGHV3-41       | K06856 |
| ENSG00000253706 | 5.13E-15 | -2.63127 | 1 | 1 RP11-758M4.4   | -      |
| ENSG00000253707 | 5.13E-15 | -2.63127 | 1 | 1 RP11-726G23.8  | -      |
| ENSG00000253709 | 5.13E-15 | -2.63127 | 1 | 1 IGHV1-14       | -      |
| ENSG00000253711 | 5.13E-15 | -2.63127 | 1 | 1 RP11-787D18.1  | -      |
| ENSG00000253712 | 5.13E-15 | -2.63127 | 1 | 1 RP11-697M17.2  | -      |
| ENSG00000253713 | 5.13E-15 | -2.63127 | 1 | 1 CTC-264O10.2   | -      |
| ENSG00000253714 | 5.13E-15 | -2.63127 | 1 | 1 IGHVII-53-1    | K06856 |
| ENSG00000253715 | 5.13E-15 | -2.63127 | 1 | 1 RP11-706C16.8  | -      |
| ENSG00000253717 | 5.13E-15 | -2.63127 | 1 | 1 KB-1299A7.2    | -      |
| ENSG00000253720 | 5.13E-15 | -2.63127 | 1 | 1 RP11-473O4.3   | -      |
| ENSG00000253721 | 5.13E-15 | -2.63127 | 1 | 1 SUMO2P20       | K12160 |
| ENSG00000253722 | 5.13E-15 | -2.63127 | 1 | 1 RP11-10N23.4   | -      |
| ENSG00000253723 | 5.13E-15 | -2.63127 | 1 | 1 RP11-960H2.1   | K11415 |
| ENSG00000253725 | 5.13E-15 | -2.63127 | 1 | 1 RP11-21I4.2    | K14822 |
| ENSG00000253726 | 5.13E-15 | -2.63127 | 1 | 1 RP11-313C15.1  | -      |
| ENSG00000253728 | 5.13E-15 | -2.63127 | 1 | 1 RP11-706C16.5  | -      |
| ENSG00000253732 | 5.13E-15 | -2.63127 | 1 | 1 IGKV2-19       | -      |
| ENSG00000253733 | 5.13E-15 | -2.63127 | 1 | 1 LZTS1-AS1      | -      |
| ENSG00000253734 | 5.13E-15 | -2.63127 | 1 | 1 RP11-579E24.1  | -      |
| ENSG00000253735 | 5.13E-15 | -2.63127 | 1 | 1 RP11-115J16.3  | -      |

|                 |          |          |   |                  |        |
|-----------------|----------|----------|---|------------------|--------|
| ENSG00000253737 | 5.13E-15 | -2.63127 | 1 | 1 KB-1460A1.3    | -      |
| ENSG00000253740 | 5.13E-15 | -2.63127 | 1 | 1 KB-1083B1.1    | -      |
| ENSG00000253741 | 5.13E-15 | -2.63127 | 1 | 1 CTD-2292P10.4  | -      |
| ENSG00000253742 | 5.13E-15 | -2.63127 | 1 | 1 IGHV3-60       | K06856 |
| ENSG00000253743 | 5.13E-15 | -2.63127 | 1 | 1 MARK2P11       | K08798 |
| ENSG00000253744 | 5.13E-15 | -2.63127 | 1 | 1 AC025442.3     | -      |
| ENSG00000253745 | 5.13E-15 | -2.63127 | 1 | 1 RP11-350F16.1  | -      |
| ENSG00000253746 | 5.13E-15 | -2.63127 | 1 | 1 RP11-527N22.2  | -      |
| ENSG00000253747 | 5.13E-15 | -2.63127 | 1 | 1 IGHVII-62-1    | -      |
| ENSG00000253748 | 5.13E-15 | -2.63127 | 1 | 1 CYP4F44P       | K17726 |
| ENSG00000253749 | 5.13E-15 | -2.63127 | 1 | 1 RP11-700E23.1  | -      |
| ENSG00000253750 | 5.13E-15 | -2.63127 | 1 | 1 RP11-21C4.4    | K03948 |
| ENSG00000253752 | 5.13E-15 | -2.63127 | 1 | 1 IGLVI-63       | -      |
| ENSG00000253753 | 5.13E-15 | -2.63127 | 1 | 1 AC145123.2     | -      |
| ENSG00000253755 | 5.13E-15 | -2.63127 | 1 | 1 IGHGP          | K06856 |
| ENSG00000253756 | 5.13E-15 | -2.63127 | 1 | 1 RP11-192P9.1   | -      |
| ENSG00000253759 | 5.13E-15 | -2.63127 | 1 | 1 IGHV3-57       | -      |
| ENSG00000253760 | 5.13E-15 | -2.63127 | 1 | 1 RP11-48B3.2    | -      |
| ENSG00000253762 | 5.13E-15 | -2.63127 | 1 | 1 RP11-579E24.2  | -      |
| ENSG00000253763 | 5.13E-15 | -2.63127 | 1 | 1 IGHV3-6        | K06856 |
| ENSG00000253765 | 5.13E-15 | -2.63127 | 1 | 1 IGKV2D-19      | -      |
| ENSG00000253766 | 5.13E-15 | -2.63127 | 1 | 1 RP11-804N13.1  | -      |
| ENSG00000253767 | 5.13E-15 | -2.63127 | 1 | 1 PCDHGA8        | K16495 |
| ENSG00000253770 | 5.13E-15 | -2.63127 | 1 | 1 HMGB1P23       | -      |
| ENSG00000253771 | 5.13E-15 | -2.63127 | 1 | 1 TPTE2P1        | K18079 |
| ENSG00000253772 | 5.13E-15 | -2.63127 | 1 | 1 RP11-34P1.1    | K14394 |
| ENSG00000253773 | 5.13E-15 | -2.63127 | 1 | 1 KB-1047C11.2   | -      |
| ENSG00000253775 | 5.13E-15 | -2.63127 | 1 | 1 AC100802.3     | -      |
| ENSG00000253776 | 5.13E-15 | -2.63127 | 1 | 1 RP11-6N13.4    | -      |
| ENSG00000253777 | 5.13E-15 | -2.63127 | 1 | 1 RP11-758M4.3   | -      |
| ENSG00000253778 | 5.13E-15 | -2.63127 | 1 | 1 RP11-386D6.2   | -      |
| ENSG00000253779 | 5.13E-15 | -2.63127 | 1 | 1 IGLVVI-25-1    | -      |
| ENSG00000253780 | 5.13E-15 | -2.63127 | 1 | 1 IGHVIII-2-1    | -      |
| ENSG00000253781 | 5.13E-15 | -2.63127 | 1 | 1 ZNF317P1       | K09228 |
| ENSG00000253782 | 5.13E-15 | -2.63127 | 1 | 1 RP11-350F16.2  | -      |
| ENSG00000253783 | 5.13E-15 | -2.63127 | 1 | 1 CTD-2534J5.1   | -      |
| ENSG00000253784 | 5.13E-15 | -2.63127 | 1 | 1 RP11-1145L24.1 | -      |
| ENSG00000253786 | 5.13E-15 | -2.63127 | 1 | 1 IGLV3-15       | -      |
| ENSG00000253787 | 5.13E-15 | -2.63127 | 1 | 1 RP11-404L6.2   | K08857 |
| ENSG00000253789 | 5.13E-15 | -2.63127 | 1 | 1 CTD-2571E19.1  | K01893 |
| ENSG00000253790 | 5.13E-15 | -2.63127 | 1 | 1 RP11-44K6.5    | -      |
| ENSG00000253792 | 5.13E-15 | -2.63127 | 1 | 1 CTC-436K13.5   | -      |
| ENSG00000253793 | 5.13E-15 | -2.63127 | 1 | 1 RP11-293D9.2   | K13514 |
| ENSG00000253794 | 5.13E-15 | -2.63127 | 1 | 1 IGLV10-67      | -      |
| ENSG00000253795 | 5.13E-15 | -2.63127 | 1 | 1 MTND1P5        | -      |
| ENSG00000253798 | 5.13E-15 | -2.63127 | 1 | 1 AC008694.3     | -      |
| ENSG00000253799 | 5.13E-15 | -2.63127 | 1 | 1 LINC01030      | -      |
| ENSG00000253800 | 5.13E-15 | -2.63127 | 1 | 1 RP11-21C4.5    | -      |
| ENSG00000253801 | 5.13E-15 | -2.63127 | 1 | 1 CTD-2060F24.1  | K09535 |
| ENSG00000253803 | 5.13E-15 | -2.63127 | 1 | 1 RP11-101E19.7  | K09228 |
| ENSG00000253805 | 5.13E-15 | -2.63127 | 1 | 1 RP11-1049H7.2  | -      |
| ENSG00000253806 | 5.13E-15 | -2.63127 | 1 | 1 CTD-2292P10.2  | -      |
| ENSG00000253807 | 5.13E-15 | -2.63127 | 1 | 1 LINC01170      | -      |
| ENSG00000253809 | 5.13E-15 | -2.63127 | 1 | 1 RP1-149L1.1    | -      |
| ENSG00000253810 | 5.13E-15 | -2.63127 | 1 | 1 PSAT1P1        | K00831 |
| ENSG00000253811 | 5.13E-15 | -2.63127 | 1 | 1 CTD-2363C16.1  | -      |
| ENSG00000253813 | 5.13E-15 | -2.63127 | 1 | 1 COX6B1P4       | K02267 |
| ENSG00000253814 | 5.13E-15 | -2.63127 | 1 | 1 MRPS36P3       | K17414 |

|                 |          |          |   |                  |        |
|-----------------|----------|----------|---|------------------|--------|
| ENSG00000253816 | 5.13E-15 | -2.63127 | 1 | 1 RP11-1415C14.3 | K01195 |
| ENSG00000253817 | 5.13E-15 | -2.63127 | 1 | 1 RP11-1134I14.6 | K06553 |
| ENSG00000253818 | 5.13E-15 | -2.63127 | 1 | 1 IGLV1-41       | --     |
| ENSG00000253820 | 5.13E-15 | -2.63127 | 1 | 1 IGHVII-67-1    | --     |
| ENSG00000253821 | 5.13E-15 | -2.63127 | 1 | 1 RP11-246K15.1  | --     |
| ENSG00000253822 | 5.13E-15 | -2.63127 | 1 | 1 IGLV3-24       | --     |
| ENSG00000253823 | 5.13E-15 | -2.63127 | 1 | 1 IGLV1-62       | --     |
| ENSG00000253825 | 5.13E-15 | -2.63127 | 1 | 1 RP11-96A1.5    | --     |
| ENSG00000253826 | 5.13E-15 | -2.63127 | 1 | 1 RP11-304M2.1   | --     |
| ENSG00000253828 | 5.13E-15 | -2.63127 | 1 | 1 MTND1P7        | --     |
| ENSG00000253829 | 5.13E-15 | -2.63127 | 1 | 1 RP11-723D22.3  | --     |
| ENSG00000253831 | 5.13E-15 | -2.63127 | 1 | 1 ETV3L          | K09433 |
| ENSG00000253834 | 5.13E-15 | -2.63127 | 1 | 1 RP11-705O24.3  | --     |
| ENSG00000253836 | 5.13E-15 | -2.63127 | 1 | 1 RP11-731N10.1  | --     |
| ENSG00000253838 | 5.13E-15 | -2.63127 | 1 | 1 RP11-44K6.2    | --     |
| ENSG00000253839 | 5.13E-15 | -2.63127 | 1 | 1 RP11-431D12.1  | --     |
| ENSG00000253840 | 5.13E-15 | -2.63127 | 1 | 1 RP11-767C6.1   | --     |
| ENSG00000253841 | 5.13E-15 | -2.63127 | 1 | 1 RP11-622O11.5  | --     |
| ENSG00000253842 | 5.13E-15 | -2.63127 | 1 | 1 KB-173C10.1    | --     |
| ENSG00000253843 | 5.13E-15 | -2.63127 | 1 | 1 RP11-769N21.2  | --     |
| ENSG00000253845 | 5.13E-15 | -2.63127 | 1 | 1 RP11-643N23.2  | K10408 |
| ENSG00000253849 | 5.13E-15 | -2.63127 | 1 | 1 RP11-759A9.1   | --     |
| ENSG00000253851 | 5.13E-15 | -2.63127 | 1 | 1 RP11-318M2.3   | --     |
| ENSG00000253852 | 5.13E-15 | -2.63127 | 1 | 1 CTB-140J7.2    | --     |
| ENSG00000253853 | 5.13E-15 | -2.63127 | 1 | 1 GS1-57L11.1    | --     |
| ENSG00000253855 | 5.13E-15 | -2.63127 | 1 | 1 AC133633.1     | --     |
| ENSG00000253857 | 5.13E-15 | -2.63127 | 1 | 1 RP11-386G21.2  | --     |
| ENSG00000253858 | 5.13E-15 | -2.63127 | 1 | 1 CTB-147C13.1   | --     |
| ENSG00000253859 | 5.13E-15 | -2.63127 | 1 | 1 RP11-157I4.4   | --     |
| ENSG00000253860 | 5.13E-15 | -2.63127 | 1 | 1 IGKV3-34       | --     |
| ENSG00000253861 | 5.13E-15 | -2.63127 | 1 | 1 SLC2A3P1       | K08142 |
| ENSG00000253862 | 5.13E-15 | -2.63127 | 1 | 1 IGHVIII-47-1   | --     |
| ENSG00000253864 | 5.13E-15 | -2.63127 | 1 | 1 AC131025.8     | --     |
| ENSG00000253866 | 5.13E-15 | -2.63127 | 1 | 1 TME97P2        | --     |
| ENSG00000253868 | 5.13E-15 | -2.63127 | 1 | 1 FER1L6-AS2     | --     |
| ENSG00000253869 | 5.13E-15 | -2.63127 | 1 | 1 PIGFP1         | K05287 |
| ENSG00000253870 | 5.13E-15 | -2.63127 | 1 | 1 IGKV1-32       | --     |
| ENSG00000253871 | 5.13E-15 | -2.63127 | 1 | 1 RP11-756K15.2  | --     |
| ENSG00000253872 | 5.13E-15 | -2.63127 | 1 | 1 RP11-90D11.1   | --     |
| ENSG00000253873 | 5.13E-15 | -2.63127 | 1 | 1 PCDHGA11       | K16495 |
| ENSG00000253874 | 5.13E-15 | -2.63127 | 1 | 1 IGLVIV-66-1    | --     |
| ENSG00000253875 | 5.13E-15 | -2.63127 | 1 | 1 RP11-16P20.3   | --     |
| ENSG00000253877 | 5.13E-15 | -2.63127 | 1 | 1 RP11-946L20.2  | --     |
| ENSG00000253879 | 5.13E-15 | -2.63127 | 1 | 1 RP11-379I19.3  | --     |
| ENSG00000253880 | 5.13E-15 | -2.63127 | 1 | 1 RP11-124B13.1  | --     |
| ENSG00000253881 | 5.13E-15 | -2.63127 | 1 | 1 RP11-52B19.8   | K04257 |
| ENSG00000253883 | 5.13E-15 | -2.63127 | 1 | 1 IGHV3-19       | K06856 |
| ENSG00000253884 | 5.13E-15 | -2.63127 | 1 | 1 RP11-726G23.2  | --     |
| ENSG00000253885 | 5.13E-15 | -2.63127 | 1 | 1 ARF1P3         | --     |
| ENSG00000253886 | 5.13E-15 | -2.63127 | 1 | 1 CTB-158E9.2    | K12185 |
| ENSG00000253887 | 5.13E-15 | -2.63127 | 1 | 1 RP11-10A14.7   | --     |
| ENSG00000253888 | 5.13E-15 | -2.63127 | 1 | 1 RP11-521M14.1  | --     |
| ENSG00000253889 | 5.13E-15 | -2.63127 | 1 | 1 IGLVI-38       | --     |
| ENSG00000253891 | 5.13E-15 | -2.63127 | 1 | 1 RP11-203E8.1   | --     |
| ENSG00000253894 | 5.13E-15 | -2.63127 | 1 | 1 RP11-45K10.2   | --     |
| ENSG00000253895 | 5.13E-15 | -2.63127 | 1 | 1 IGHVII-44-2    | --     |
| ENSG00000253896 | 5.13E-15 | -2.63127 | 1 | 1 AC144568.2     | --     |
| ENSG00000253897 | 5.13E-15 | -2.63127 | 1 | 1 CTB-23I7.1     | K14209 |

|                 |          |          |   |                  |        |
|-----------------|----------|----------|---|------------------|--------|
| ENSG00000253900 | 5.13E-15 | -2.63127 | 1 | 1 CDH12P4        | K06804 |
| ENSG00000253901 | 5.13E-15 | -2.63127 | 1 | 1 RP11-122C21.1  | -      |
| ENSG00000253903 | 5.13E-15 | -2.63127 | 1 | 1 RP11-521M14.2  | -      |
| ENSG00000253906 | 5.13E-15 | -2.63127 | 1 | 1 IGKV2D-10      | -      |
| ENSG00000253907 | 5.13E-15 | -2.63127 | 1 | 1 RP11-380I10.3  | -      |
| ENSG00000253912 | 5.13E-15 | -2.63127 | 1 | 1 RP11-402L5.2   | -      |
| ENSG00000253913 | 5.13E-15 | -2.63127 | 1 | 1 IGLV3-26       | -      |
| ENSG00000253915 | 5.13E-15 | -2.63127 | 1 | 1 MAPRE1P1       | K10436 |
| ENSG00000253916 | 5.13E-15 | -2.63127 | 1 | 1 CTD-2309H9.2   | K02256 |
| ENSG00000253920 | 5.13E-15 | -2.63127 | 1 | 1 IGLV3-31       | -      |
| ENSG00000253923 | 5.13E-15 | -2.63127 | 1 | 1 KB-1980E6.2    | K04613 |
| ENSG00000253924 | 5.13E-15 | -2.63127 | 1 | 1 RP11-1023P17.2 | -      |
| ENSG00000253925 | 5.13E-15 | -2.63127 | 1 | 1 CTB-178M22.1   | -      |
| ENSG00000253926 | 5.13E-15 | -2.63127 | 1 | 1 RP11-26E5.1    | -      |
| ENSG00000253927 | 5.13E-15 | -2.63127 | 1 | 1 GS1-39E22.1    | -      |
| ENSG00000253929 | 5.13E-15 | -2.63127 | 1 | 1 RP11-382A18.2  | -      |
| ENSG00000253932 | 5.13E-15 | -2.63127 | 1 | 1 RP11-10C8.2    | -      |
| ENSG00000253934 | 5.13E-15 | -2.63127 | 1 | 1 MRPL49P2       | K17430 |
| ENSG00000253935 | 5.13E-15 | -2.63127 | 1 | 1 IGLVIV-53      | -      |
| ENSG00000253936 | 5.13E-15 | -2.63127 | 1 | 1 IGHV3-63       | K06856 |
| ENSG00000253937 | 5.13E-15 | -2.63127 | 1 | 1 NATP           | -      |
| ENSG00000253939 | 5.13E-15 | -2.63127 | 1 | 1 RP11-44K6.3    | -      |
| ENSG00000253940 | 5.13E-15 | -2.63127 | 1 | 1 CTD-2127O16.2  | -      |
| ENSG00000253941 | 5.13E-15 | -2.63127 | 1 | 1 IGHVII-51-2    | -      |
| ENSG00000253942 | 5.13E-15 | -2.63127 | 1 | 1 KB-1410C5.1    | -      |
| ENSG00000253943 | 5.13E-15 | -2.63127 | 1 | 1 KRT18P37       | K07604 |
| ENSG00000253945 | 5.13E-15 | -2.63127 | 1 | 1 RP11-328L11.1  | K02929 |
| ENSG00000253946 | 5.13E-15 | -2.63127 | 1 | 1 CTC-425K20.1   | K02889 |
| ENSG00000253947 | 5.13E-15 | -2.63127 | 1 | 1 CTB-77H17.1    | -      |
| ENSG00000253949 | 5.13E-15 | -2.63127 | 1 | 1 RP11-790J24.1  | -      |
| ENSG00000253951 | 5.13E-15 | -2.63127 | 1 | 1 RP11-447G11.1  | -      |
| ENSG00000253952 | 5.13E-15 | -2.63127 | 1 | 1 HIGD1AP18      | -      |
| ENSG00000253953 | 5.13E-15 | -2.63127 | 1 | 1 PCDHGB4        | K16496 |
| ENSG00000253955 | 5.13E-15 | -2.63127 | 1 | 1 CTB-33O18.3    | -      |
| ENSG00000253956 | 5.13E-15 | -2.63127 | 1 | 1 RP11-211F2.1   | -      |
| ENSG00000253957 | 5.13E-15 | -2.63127 | 1 | 1 IGHV3-22       | K06856 |
| ENSG00000253959 | 5.13E-15 | -2.63127 | 1 | 1 CTB-43E15.1    | -      |
| ENSG00000253960 | 5.13E-15 | -2.63127 | 1 | 1 RP11-388K12.1  | -      |
| ENSG00000253961 | 5.13E-15 | -2.63127 | 1 | 1 RP11-363L24.3  | -      |
| ENSG00000253963 | 5.13E-15 | -2.63127 | 1 | 1 IGLV3-2        | -      |
| ENSG00000253964 | 5.13E-15 | -2.63127 | 1 | 1 RPL31P40       | K02910 |
| ENSG00000253967 | 5.13E-15 | -2.63127 | 1 | 1 RP11-333A23.4  | -      |
| ENSG00000253968 | 5.13E-15 | -2.63127 | 1 | 1 CTB-32H22.1    | -      |
| ENSG00000253970 | 5.13E-15 | -2.63127 | 1 | 1 MTND2P7        | -      |
| ENSG00000253973 | 5.13E-15 | -2.63127 | 1 | 1 RP11-467K18.2  | -      |
| ENSG00000253974 | 5.13E-15 | -2.63127 | 1 | 1 NRG1-IT1       | -      |
| ENSG00000253975 | 5.13E-15 | -2.63127 | 1 | 1 RP11-577N1.2   | K04552 |
| ENSG00000253976 | 5.13E-15 | -2.63127 | 1 | 1 RP11-386G21.1  | -      |
| ENSG00000253977 | 5.13E-15 | -2.63127 | 1 | 1 KB-1639H6.8    | -      |
| ENSG00000253979 | 5.13E-15 | -2.63127 | 1 | 1 RP11-443C10.2  | -      |
| ENSG00000253980 | 5.13E-15 | -2.63127 | 1 | 1 CTB-4E7.1      | -      |
| ENSG00000253985 | 5.13E-15 | -2.63127 | 1 | 1 RP11-136K7.3   | -      |
| ENSG00000253988 | 5.13E-15 | -2.63127 | 1 | 1 RP11-489O18.1  | -      |
| ENSG00000253989 | 5.13E-15 | -2.63127 | 1 | 1 IGHVIII-38-1   | -      |
| ENSG00000253991 | 5.13E-15 | -2.63127 | 1 | 1 KB-1562D12.2   | K18732 |
| ENSG00000253992 | 5.13E-15 | -2.63127 | 1 | 1 RP11-737F9.1   | -      |
| ENSG00000253993 | 5.13E-15 | -2.63127 | 1 | 1 RP11-451O18.1  | K17264 |
| ENSG00000253994 | 5.13E-15 | -2.63127 | 1 | 1 KB-1299A7.1    | K03965 |

|                 |          |          |   |                 |        |
|-----------------|----------|----------|---|-----------------|--------|
| ENSG00000253995 | 5.13E-15 | -2.63127 | 1 | 1 RP11-10D7.5   | K02866 |
| ENSG00000253996 | 5.13E-15 | -2.63127 | 1 | 1 IGHVII-20-1   | K12581 |
| ENSG00000253997 | 5.13E-15 | -2.63127 | 1 | 1 RP11-200A13.3 | -      |
| ENSG00000253998 | 5.13E-15 | -2.63127 | 1 | 1 IGKV2-29      | -      |
| ENSG00000253999 | 5.13E-15 | -2.63127 | 1 | 1 IGKV3D-31     | -      |
| ENSG00000254000 | 5.13E-15 | -2.63127 | 1 | 1 RP11-245A18.1 | -      |
| ENSG00000254001 | 5.13E-15 | -2.63127 | 1 | 1 RP11-91P17.1  | -      |
| ENSG00000254002 | 5.13E-15 | -2.63127 | 1 | 1 RP11-213G6.2  | -      |
| ENSG00000254006 | 5.13E-15 | -2.63127 | 1 | 1 RP11-1D12.2   | -      |
| ENSG00000254007 | 5.13E-15 | -2.63127 | 1 | 1 RP11-281H11.1 | -      |
| ENSG00000254008 | 5.13E-15 | -2.63127 | 1 | 1 LINC00051     | -      |
| ENSG00000254009 | 5.13E-15 | -2.63127 | 1 | 1 IGKV2D-38     | -      |
| ENSG00000254010 | 5.13E-15 | -2.63127 | 1 | 1 RP11-103H7.5  | -      |
| ENSG00000254011 | 5.13E-15 | -2.63127 | 1 | 1 CTC-229L21.1  | -      |
| ENSG00000254012 | 5.13E-15 | -2.63127 | 1 | 1 RP11-546B8.5  | K02866 |
| ENSG00000254013 | 5.13E-15 | -2.63127 | 1 | 1 MAP2K1P1      | K04368 |
| ENSG00000254014 | 5.13E-15 | -2.63127 | 1 | 1 RP11-363E6.1  | K02880 |
| ENSG00000254015 | 5.13E-15 | -2.63127 | 1 | 1 CTD-2547L16.2 | -      |
| ENSG00000254017 | 5.13E-15 | -2.63127 | 1 | 1 IGHEP2        | -      |
| ENSG00000254018 | 5.13E-15 | -2.63127 | 1 | 1 RP11-785H20.1 | -      |
| ENSG00000254019 | 5.13E-15 | -2.63127 | 1 | 1 RP11-10J21.3  | -      |
| ENSG00000254020 | 5.13E-15 | -2.63127 | 1 | 1 RP11-100L22.4 | -      |
| ENSG00000254021 | 5.13E-15 | -2.63127 | 1 | 1 RP11-778D12.2 | -      |
| ENSG00000254023 | 5.13E-15 | -2.63127 | 1 | 1 PKMP4         | K00873 |
| ENSG00000254024 | 5.13E-15 | -2.63127 | 1 | 1 KB-1562D12.1  | -      |
| ENSG00000254025 | 5.13E-15 | -2.63127 | 1 | 1 RP11-119N19.1 | K14820 |
| ENSG00000254026 | 5.13E-15 | -2.63127 | 1 | 1 RP11-369E15.2 | -      |
| ENSG00000254027 | 5.13E-15 | -2.63127 | 1 | 1 RP11-363E6.3  | -      |
| ENSG00000254029 | 5.13E-15 | -2.63127 | 1 | 1 IGLC4         | K06554 |
| ENSG00000254030 | 5.13E-15 | -2.63127 | 1 | 1 IGLC5         | K06554 |
| ENSG00000254031 | 5.13E-15 | -2.63127 | 1 | 1 RP11-326E22.1 | -      |
| ENSG00000254033 | 5.13E-15 | -2.63127 | 1 | 1 RP11-431M3.2  | -      |
| ENSG00000254035 | 5.13E-15 | -2.63127 | 1 | 1 RP11-281O15.4 | -      |
| ENSG00000254036 | 5.13E-15 | -2.63127 | 1 | 1 IGHVIII-67-2  | -      |
| ENSG00000254037 | 5.13E-15 | -2.63127 | 1 | 1 RP11-775B15.3 | -      |
| ENSG00000254040 | 5.13E-15 | -2.63127 | 1 | 1 RP11-421P23.2 | -      |
| ENSG00000254041 | 5.13E-15 | -2.63127 | 1 | 1 RP11-574O7.1  | -      |
| ENSG00000254042 | 5.13E-15 | -2.63127 | 1 | 1 CTC-558O2.1   | -      |
| ENSG00000254043 | 5.13E-15 | -2.63127 | 1 | 1 RP11-3N13.2   | -      |
| ENSG00000254044 | 5.13E-15 | -2.63127 | 1 | 1 RP11-681L8.1  | -      |
| ENSG00000254045 | 5.13E-15 | -2.63127 | 1 | 1 IGHVIII-22-2  | -      |
| ENSG00000254046 | 5.13E-15 | -2.63127 | 1 | 1 IGHV1-17      | -      |
| ENSG00000254047 | 5.13E-15 | -2.63127 | 1 | 1 CTC-436K13.4  | K03648 |
| ENSG00000254048 | 5.13E-15 | -2.63127 | 1 | 1 RP11-328K2.1  | -      |
| ENSG00000254049 | 5.13E-15 | -2.63127 | 1 | 1 NRG1-IT3      | -      |
| ENSG00000254050 | 5.13E-15 | -2.63127 | 1 | 1 RP11-577N1.1  | -      |
| ENSG00000254051 | 5.13E-15 | -2.63127 | 1 | 1 RP11-403D15.1 | K03943 |
| ENSG00000254052 | 5.13E-15 | -2.63127 | 1 | 1 IGHVIII-67-4  | -      |
| ENSG00000254053 | 5.13E-15 | -2.63127 | 1 | 1 IGHVIII-5-2   | -      |
| ENSG00000254054 | 5.13E-15 | -2.63127 | 1 | 1 RP11-156K13.3 | -      |
| ENSG00000254055 | 5.13E-15 | -2.63127 | 1 | 1 RP11-17A4.4   | -      |
| ENSG00000254056 | 5.13E-15 | -2.63127 | 1 | 1 IGHV3-71      | K06856 |
| ENSG00000254057 | 5.13E-15 | -2.63127 | 1 | 1 RP3-388N13.3  | -      |
| ENSG00000254060 | 5.13E-15 | -2.63127 | 1 | 1 RP11-172E10.1 | -      |
| ENSG00000254061 | 5.13E-15 | -2.63127 | 1 | 1 RP11-359B20.1 | K13187 |
| ENSG00000254065 | 5.13E-15 | -2.63127 | 1 | 1 RP11-697N18.2 | K10580 |
| ENSG00000254066 | 5.13E-15 | -2.63127 | 1 | 1 CTB-181F24.1  | -      |
| ENSG00000254067 | 5.13E-15 | -2.63127 | 1 | 1 RP11-122L4.1  | -      |

|                 |          |          |   |                  |        |
|-----------------|----------|----------|---|------------------|--------|
| ENSG00000254069 | 5.13E-15 | -2.63127 | 1 | 1 RP11-359P18.7  | K17299 |
| ENSG00000254070 | 5.13E-15 | -2.63127 | 1 | 1 RP11-790L1.3   | -      |
| ENSG00000254073 | 5.13E-15 | -2.63127 | 1 | 1 IGLVVII-41-1   | -      |
| ENSG00000254075 | 5.13E-15 | -2.63127 | 1 | 1 IGLVV-66       | -      |
| ENSG00000254076 | 5.13E-15 | -2.63127 | 1 | 1 CTD-3145H4.1   | -      |
| ENSG00000254077 | 5.13E-15 | -2.63127 | 1 | 1 IGLV3-7        | -      |
| ENSG00000254079 | 5.13E-15 | -2.63127 | 1 | 1 RP11-31K23.1   | K12892 |
| ENSG00000254080 | 5.13E-15 | -2.63127 | 1 | 1 RP11-730G20.1  | -      |
| ENSG00000254081 | 5.13E-15 | -2.63127 | 1 | 1 CTD-3025N20.2  | -      |
| ENSG00000254082 | 5.13E-15 | -2.63127 | 1 | 1 CTD-2024D23.1  | -      |
| ENSG00000254083 | 5.13E-15 | -2.63127 | 1 | 1 RP11-452N4.1   | -      |
| ENSG00000254086 | 5.13E-15 | -2.63127 | 1 | 1 RP11-94H18.2   | -      |
| ENSG00000254089 | 5.13E-15 | -2.63127 | 1 | 1 RP11-388K12.2  | -      |
| ENSG00000254090 | 5.13E-15 | -2.63127 | 1 | 1 MTND2P32       | K03879 |
| ENSG00000254091 | 5.13E-15 | -2.63127 | 1 | 1 RP11-10A14.8   | -      |
| ENSG00000254092 | 5.13E-15 | -2.63127 | 1 | 1 RP11-369E15.3  | -      |
| ENSG00000254094 | 5.13E-15 | -2.63127 | 1 | 1 AC078852.1     | -      |
| ENSG00000254095 | 5.13E-15 | -2.63127 | 1 | 1 RP11-566H8.2   | -      |
| ENSG00000254097 | 5.13E-15 | -2.63127 | 1 | 1 IGKV3D-25      | -      |
| ENSG00000254098 | 5.13E-15 | -2.63127 | 1 | 1 IGKV2-26       | -      |
| ENSG00000254099 | 5.13E-15 | -2.63127 | 1 | 1 AC005740.5     | -      |
| ENSG00000254100 | 5.13E-15 | -2.63127 | 1 | 1 RP11-675F6.4   | -      |
| ENSG00000254102 | 5.13E-15 | -2.63127 | 1 | 1 RP11-21C4.1    | -      |
| ENSG00000254103 | 5.13E-15 | -2.63127 | 1 | 1 RP11-114M5.3   | K03767 |
| ENSG00000254104 | 5.13E-15 | -2.63127 | 1 | 1 RP11-63E5.1    | -      |
| ENSG00000254105 | 5.13E-15 | -2.63127 | 1 | 1 VENTXP6        | -      |
| ENSG00000254106 | 5.13E-15 | -2.63127 | 1 | 1 AC011366.3     | K15637 |
| ENSG00000254111 | 5.13E-15 | -2.63127 | 1 | 1 RP11-150O12.5  | -      |
| ENSG00000254112 | 5.13E-15 | -2.63127 | 1 | 1 KB-1205A7.1    | K02131 |
| ENSG00000254113 | 5.13E-15 | -2.63127 | 1 | 1 RP11-174I12.2  | -      |
| ENSG00000254114 | 5.13E-15 | -2.63127 | 1 | 1 HMGN1P28       | K11299 |
| ENSG00000254115 | 5.13E-15 | -2.63127 | 1 | 1 RP11-386D6.1   | -      |
| ENSG00000254117 | 5.13E-15 | -2.63127 | 1 | 1 IGHV2-10       | -      |
| ENSG00000254118 | 5.13E-15 | -2.63127 | 1 | 1 RP11-101E19.4  | K00412 |
| ENSG00000254123 | 5.13E-15 | -2.63127 | 1 | 1 RP11-99H20.1   | -      |
| ENSG00000254124 | 5.13E-15 | -2.63127 | 1 | 1 EEF1A1P37      | -      |
| ENSG00000254126 | 5.13E-15 | -2.63127 | 1 | 1 CD8BP          | K06459 |
| ENSG00000254127 | 5.13E-15 | -2.63127 | 1 | 1 IGLCOR22-1     | K06554 |
| ENSG00000254129 | 5.13E-15 | -2.63127 | 1 | 1 CTD-2647L4.1   | -      |
| ENSG00000254130 | 5.13E-15 | -2.63127 | 1 | 1 CTB-7E3.1      | -      |
| ENSG00000254131 | 5.13E-15 | -2.63127 | 1 | 1 RP11-1007J8.1  | K17108 |
| ENSG00000254132 | 5.13E-15 | -2.63127 | 1 | 1 MTND6P3        | K03884 |
| ENSG00000254133 | 5.13E-15 | -2.63127 | 1 | 1 RP11-1198D22.3 | -      |
| ENSG00000254134 | 5.13E-15 | -2.63127 | 1 | 1 IGHVII-74-1    | -      |
| ENSG00000254135 | 5.13E-15 | -2.63127 | 1 | 1 RP11-32D16.1   | -      |
| ENSG00000254136 | 5.13E-15 | -2.63127 | 1 | 1 RP11-546K22.2  | -      |
| ENSG00000254138 | 5.13E-15 | -2.63127 | 1 | 1 RP11-152K4.2   | -      |
| ENSG00000254139 | 5.13E-15 | -2.63127 | 1 | 1 CTD-2339F6.1   | -      |
| ENSG00000254140 | 5.13E-15 | -2.63127 | 1 | 1 RP11-731F5.1   | -      |
| ENSG00000254141 | 5.13E-15 | -2.63127 | 1 | 1 RP11-642D21.1  | -      |
| ENSG00000254144 | 5.13E-15 | -2.63127 | 1 | 1 7SK            | -      |
| ENSG00000254145 | 5.13E-15 | -2.63127 | 1 | 1 RP11-359P18.5  | -      |
| ENSG00000254146 | 5.13E-15 | -2.63127 | 1 | 1 HMGB1P46       | K15413 |
| ENSG00000254148 | 5.13E-15 | -2.63127 | 1 | 1 RP11-84E24.2   | -      |
| ENSG00000254150 | 5.13E-15 | -2.63127 | 1 | 1 RP11-379I19.2  | K03574 |
| ENSG00000254151 | 5.13E-15 | -2.63127 | 1 | 1 NIPA2P4        | -      |
| ENSG00000254152 | 5.13E-15 | -2.63127 | 1 | 1 CTD-3107M8.2   | K03767 |
| ENSG00000254153 | 5.13E-15 | -2.63127 | 1 | 1 CTA-398F10.2   | -      |

|                 |          |          |   |                  |        |
|-----------------|----------|----------|---|------------------|--------|
| ENSG00000254154 | 5.13E-15 | -2.63127 | 1 | 1 RP4-798P15.3   | --     |
| ENSG00000254156 | 5.13E-15 | -2.63127 | 1 | 1 MTND6P20       | --     |
| ENSG00000254157 | 5.13E-15 | -2.63127 | 1 | 1 IGKV2-18       | --     |
| ENSG00000254158 | 5.13E-15 | -2.63127 | 1 | 1 RP11-281O15.5  | K10261 |
| ENSG00000254160 | 5.13E-15 | -2.63127 | 1 | 1 CTD-2281E23.3  | --     |
| ENSG00000254161 | 5.13E-15 | -2.63127 | 1 | 1 IGLVIV-65      | K06553 |
| ENSG00000254163 | 5.13E-15 | -2.63127 | 1 | 1 CTC-340I23.2   | --     |
| ENSG00000254164 | 5.13E-15 | -2.63127 | 1 | 1 CTB-33O18.2    | --     |
| ENSG00000254167 | 5.13E-15 | -2.63127 | 1 | 1 IGHVIII-51-1   | --     |
| ENSG00000254170 | 5.13E-15 | -2.63127 | 1 | 1 CTD-2073O6.1   | K02984 |
| ENSG00000254171 | 5.13E-15 | -2.63127 | 1 | 1 RP11-67M9.1    | --     |
| ENSG00000254172 | 5.13E-15 | -2.63127 | 1 | 1 RNU5A-3P       | --     |
| ENSG00000254173 | 5.13E-15 | -2.63127 | 1 | 1 RP11-96G10.1   | --     |
| ENSG00000254174 | 5.13E-15 | -2.63127 | 1 | 1 IGHV1-12       | --     |
| ENSG00000254175 | 5.13E-15 | -2.63127 | 1 | 1 IGLVI-42       | --     |
| ENSG00000254176 | 5.13E-15 | -2.63127 | 1 | 1 IGHV3-75       | --     |
| ENSG00000254177 | 5.13E-15 | -2.63127 | 1 | 1 RP11-1149M10.1 | --     |
| ENSG00000254178 | 5.13E-15 | -2.63127 | 1 | 1 RP11-299D14.2  | --     |
| ENSG00000254180 | 5.13E-15 | -2.63127 | 1 | 1 AB015752.3     | --     |
| ENSG00000254181 | 5.13E-15 | -2.63127 | 1 | 1 SLC25A51P3     | --     |
| ENSG00000254182 | 5.13E-15 | -2.63127 | 1 | 1 RP11-68L18.2   | --     |
| ENSG00000254183 | 5.13E-15 | -2.63127 | 1 | 1 RP11-953B20.2  | K09528 |
| ENSG00000254185 | 5.13E-15 | -2.63127 | 1 | 1 RP11-419L20.2  | K06855 |
| ENSG00000254186 | 5.13E-15 | -2.63127 | 1 | 1 RP11-167P20.1  | --     |
| ENSG00000254187 | 5.13E-15 | -2.63127 | 1 | 1 CTB-78F1.1     | --     |
| ENSG00000254189 | 5.13E-15 | -2.63127 | 1 | 1 RP11-296C13.1  | --     |
| ENSG00000254190 | 5.13E-15 | -2.63127 | 1 | 1 RP11-267M23.5  | K08789 |
| ENSG00000254192 | 5.13E-15 | -2.63127 | 1 | 1 CTC-558O2.2    | --     |
| ENSG00000254193 | 5.13E-15 | -2.63127 | 1 | 1 RP11-585F1.8   | K08789 |
| ENSG00000254194 | 5.13E-15 | -2.63127 | 1 | 1 RP1-273G13.3   | --     |
| ENSG00000254195 | 5.13E-15 | -2.63127 | 1 | 1 TPM3P3         | K09290 |
| ENSG00000254199 | 5.13E-15 | -2.63127 | 1 | 1 AC008691.1     | --     |
| ENSG00000254200 | 5.13E-15 | -2.63127 | 1 | 1 RPL7AP33       | K02936 |
| ENSG00000254201 | 5.13E-15 | -2.63127 | 1 | 1 RP11-618M23.2  | --     |
| ENSG00000254202 | 5.13E-15 | -2.63127 | 1 | 1 RP11-120I21.2  | --     |
| ENSG00000254203 | 5.13E-15 | -2.63127 | 1 | 1 IGHVII-33-1    | --     |
| ENSG00000254204 | 5.13E-15 | -2.63127 | 1 | 1 RP11-400K9.3   | --     |
| ENSG00000254205 | 5.13E-15 | -2.63127 | 1 | 1 RP11-92K15.1   | --     |
| ENSG00000254208 | 5.13E-15 | -2.63127 | 1 | 1 RP11-219B4.3   | --     |
| ENSG00000254209 | 5.13E-15 | -2.63127 | 1 | 1 RP11-3G20.1    | --     |
| ENSG00000254210 | 5.13E-15 | -2.63127 | 1 | 1 IGHVIII-16-1   | --     |
| ENSG00000254211 | 5.13E-15 | -2.63127 | 1 | 1 CTB-43E15.4    | --     |
| ENSG00000254212 | 5.13E-15 | -2.63127 | 1 | 1 RP11-98H4.4    | K02365 |
| ENSG00000254213 | 5.13E-15 | -2.63127 | 1 | 1 RP11-434I12.5  | --     |
| ENSG00000254214 | 5.13E-15 | -2.63127 | 1 | 1 IGHVII-28-1    | --     |
| ENSG00000254215 | 5.13E-15 | -2.63127 | 1 | 1 IGHVIII-11-1   | --     |
| ENSG00000254216 | 5.13E-15 | -2.63127 | 1 | 1 RP11-140I16.2  | --     |
| ENSG00000254219 | 5.13E-15 | -2.63127 | 1 | 1 GS1-251I9.2    | --     |
| ENSG00000254220 | 5.13E-15 | -2.63127 | 1 | 1 IGKV2D-18      | --     |
| ENSG00000254221 | 5.13E-15 | -2.63127 | 1 | 1 PCDHGB1        | K16496 |
| ENSG00000254222 | 5.13E-15 | -2.63127 | 1 | 1 RP11-787D18.2  | --     |
| ENSG00000254223 | 5.13E-15 | -2.63127 | 1 | 1 RP11-419K12.1  | --     |
| ENSG00000254224 | 5.13E-15 | -2.63127 | 1 | 1 KB-1043D8.6    | --     |
| ENSG00000254225 | 5.13E-15 | -2.63127 | 1 | 1 RP11-11C20.1   | K01527 |
| ENSG00000254227 | 5.13E-15 | -2.63127 | 1 | 1 RP11-622O11.4  | --     |
| ENSG00000254228 | 5.13E-15 | -2.63127 | 1 | 1 IGHV3-42       | K06856 |
| ENSG00000254229 | 5.13E-15 | -2.63127 | 1 | 1 FAM90A12P      | --     |
| ENSG00000254230 | 5.13E-15 | -2.63127 | 1 | 1 RP11-582J16.3  | --     |

|                 |          |          |   |                  |        |
|-----------------|----------|----------|---|------------------|--------|
| ENSG00000254233 | 5.13E-15 | -2.63127 | 1 | 1 RP11-242J7.1   | --     |
| ENSG00000254235 | 5.13E-15 | -2.63127 | 1 | 1 RP11-115J16.1  | --     |
| ENSG00000254236 | 5.13E-15 | -2.63127 | 1 | 1 KB-1639H6.2    | --     |
| ENSG00000254237 | 5.13E-15 | -2.63127 | 1 | 1 RP11-115J16.2  | --     |
| ENSG00000254238 | 5.13E-15 | -2.63127 | 1 | 1 RP11-300E4.2   | --     |
| ENSG00000254239 | 5.13E-15 | -2.63127 | 1 | 1 GS1-39E22.2    | --     |
| ENSG00000254240 | 5.13E-15 | -2.63127 | 1 | 1 IGLVI-20       | --     |
| ENSG00000254241 | 5.13E-15 | -2.63127 | 1 | 1 RP11-946L20.1  | K02256 |
| ENSG00000254242 | 5.13E-15 | -2.63127 | 1 | 1 RP11-1080G15.2 | --     |
| ENSG00000254245 | 5.13E-15 | -2.63127 | 1 | 1 PCDHGA3        | K16495 |
| ENSG00000254246 | 5.13E-15 | -2.63127 | 1 | 1 CTB-120L21.1   | --     |
| ENSG00000254247 | 5.13E-15 | -2.63127 | 1 | 1 RP11-278I4.1   | --     |
| ENSG00000254248 | 5.13E-15 | -2.63127 | 1 | 1 RP11-320N21.2  | --     |
| ENSG00000254249 | 5.13E-15 | -2.63127 | 1 | 1 RP11-959I15.4  | --     |
| ENSG00000254251 | 5.13E-15 | -2.63127 | 1 | 1 RP11-662G23.1  | --     |
| ENSG00000254252 | 5.13E-15 | -2.63127 | 1 | 1 RPL7P20        | K02937 |
| ENSG00000254253 | 5.13E-15 | -2.63127 | 1 | 1 RP11-343B22.2  | K03626 |
| ENSG00000254255 | 5.13E-15 | -2.63127 | 1 | 1 CTD-2008O4.1   | --     |
| ENSG00000254256 | 5.13E-15 | -2.63127 | 1 | 1 RP11-117L6.1   | K02998 |
| ENSG00000254258 | 5.13E-15 | -2.63127 | 1 | 1 RP11-398H6.1   | --     |
| ENSG00000254260 | 5.13E-15 | -2.63127 | 1 | 1 RP11-369E15.1  | --     |
| ENSG00000254261 | 5.13E-15 | -2.63127 | 1 | 1 RP11-18A15.1   | --     |
| ENSG00000254262 | 5.13E-15 | -2.63127 | 1 | 1 RP11-58O3.2    | --     |
| ENSG00000254263 | 5.13E-15 | -2.63127 | 1 | 1 RP11-473O4.4   | --     |
| ENSG00000254264 | 5.13E-15 | -2.63127 | 1 | 1 IGKV3OR22-2    | --     |
| ENSG00000254265 | 5.13E-15 | -2.63127 | 1 | 1 CTD-2336O2.2   | K02310 |
| ENSG00000254266 | 5.13E-15 | -2.63127 | 1 | 1 RP11-594N15.2  | --     |
| ENSG00000254268 | 5.13E-15 | -2.63127 | 1 | 1 RFPL4AP7       | --     |
| ENSG00000254269 | 5.13E-15 | -2.63127 | 1 | 1 CTD-2281E23.2  | --     |
| ENSG00000254270 | 5.13E-15 | -2.63127 | 1 | 1 ERHP1          | --     |
| ENSG00000254271 | 5.13E-15 | -2.63127 | 1 | 1 RP11-131N11.4  | --     |
| ENSG00000254272 | 5.13E-15 | -2.63127 | 1 | 1 RP11-382J24.2  | K01527 |
| ENSG00000254276 | 5.13E-15 | -2.63127 | 1 | 1 RP11-1198D22.2 | --     |
| ENSG00000254277 | 5.13E-15 | -2.63127 | 1 | 1 RP11-1144P22.1 | --     |
| ENSG00000254278 | 5.13E-15 | -2.63127 | 1 | 1 RP11-278I4.2   | --     |
| ENSG00000254279 | 5.13E-15 | -2.63127 | 1 | 1 IGHVII-1-1     | --     |
| ENSG00000254281 | 5.13E-15 | -2.63127 | 1 | 1 KB-1507C5.4    | --     |
| ENSG00000254283 | 5.13E-15 | -2.63127 | 1 | 1 RP11-267M23.7  | K02130 |
| ENSG00000254284 | 5.13E-15 | -2.63127 | 1 | 1 IGHV3-79       | K06856 |
| ENSG00000254287 | 5.13E-15 | -2.63127 | 1 | 1 RP11-44K6.4    | --     |
| ENSG00000254288 | 5.13E-15 | -2.63127 | 1 | 1 RP11-6I2.3     | --     |
| ENSG00000254289 | 5.13E-15 | -2.63127 | 1 | 1 IGHV3-32       | --     |
| ENSG00000254291 | 5.13E-15 | -2.63127 | 1 | 1 RP11-10J21.6   | --     |
| ENSG00000254292 | 5.13E-15 | -2.63127 | 1 | 1 IGKV2D-14      | --     |
| ENSG00000254293 | 5.13E-15 | -2.63127 | 1 | 1 CTB-158E9.1    | --     |
| ENSG00000254295 | 5.13E-15 | -2.63127 | 1 | 1 CTC-308K20.2   | --     |
| ENSG00000254297 | 5.13E-15 | -2.63127 | 1 | 1 CTC-286N12.1   | --     |
| ENSG00000254298 | 5.13E-15 | -2.63127 | 1 | 1 CTB-17P3.4     | --     |
| ENSG00000254299 | 5.13E-15 | -2.63127 | 1 | 1 CTB-54I1.1     | --     |
| ENSG00000254302 | 5.13E-15 | -2.63127 | 1 | 1 RP11-431M3.1   | --     |
| ENSG00000254303 | 5.13E-15 | -2.63127 | 1 | 1 RP11-398G24.2  | --     |
| ENSG00000254305 | 5.13E-15 | -2.63127 | 1 | 1 MRPL9P1        | K02939 |
| ENSG00000254306 | 5.13E-15 | -2.63127 | 1 | 1 RP11-150O12.4  | --     |
| ENSG00000254307 | 5.13E-15 | -2.63127 | 1 | 1 KB-1608C10.2   | --     |
| ENSG00000254308 | 5.13E-15 | -2.63127 | 1 | 1 IGLVIV-59      | --     |
| ENSG00000254309 | 5.13E-15 | -2.63127 | 1 | 1 RP11-89M20.1   | K18932 |
| ENSG00000254310 | 5.13E-15 | -2.63127 | 1 | 1 CTD-2045M21.1  | --     |
| ENSG00000254311 | 5.13E-15 | -2.63127 | 1 | 1 RP11-52B19.7   | K11095 |



|                 |          |          |   |                  |        |
|-----------------|----------|----------|---|------------------|--------|
| ENSG00000254312 | 5.13E-15 | -2.63127 | 1 | 1 MRP63P7        | -      |
| ENSG00000254313 | 5.13E-15 | -2.63127 | 1 | 1 CTD-2309H9.4   | K00940 |
| ENSG00000254314 | 5.13E-15 | -2.63127 | 1 | 1 RP11-26M5.3    | -      |
| ENSG00000254315 | 5.13E-15 | -2.63127 | 1 | 1 RP11-267M23.3  | -      |
| ENSG00000254316 | 5.13E-15 | -2.63127 | 1 | 1 CTD-2345M20.2  | -      |
| ENSG00000254318 | 5.13E-15 | -2.63127 | 1 | 1 C8orf87        | -      |
| ENSG00000254319 | 5.13E-15 | -2.63127 | 1 | 1 RP11-134O21.1  | -      |
| ENSG00000254320 | 5.13E-15 | -2.63127 | 1 | 1 RP11-593P24.4  | -      |
| ENSG00000254321 | 5.13E-15 | -2.63127 | 1 | 1 RP11-495O10.1  | -      |
| ENSG00000254324 | 5.13E-15 | -2.63127 | 1 | 1 MIR151A        | -      |
| ENSG00000254325 | 5.13E-15 | -2.63127 | 1 | 1 RP11-318K15.2  | -      |
| ENSG00000254326 | 5.13E-15 | -2.63127 | 1 | 1 IGHV7-27       | -      |
| ENSG00000254329 | 5.13E-15 | -2.63127 | 1 | 1 IGHVII-60-1    | -      |
| ENSG00000254330 | 5.13E-15 | -2.63127 | 1 | 1 RP11-1D12.1    | -      |
| ENSG00000254333 | 5.13E-15 | -2.63127 | 1 | 1 CTC-367J11.1   | -      |
| ENSG00000254334 | 5.13E-15 | -2.63127 | 1 | 1 RP11-24P4.1    | -      |
| ENSG00000254335 | 5.13E-15 | -2.63127 | 1 | 1 CDH12P1        | K06804 |
| ENSG00000254336 | 5.13E-15 | -2.63127 | 1 | 1 AC008694.2     | K02984 |
| ENSG00000254337 | 5.13E-15 | -2.63127 | 1 | 1 RP11-865I6.2   | -      |
| ENSG00000254341 | 5.13E-15 | -2.63127 | 1 | 1 SNORD87        | -      |
| ENSG00000254342 | 5.13E-15 | -2.63127 | 1 | 1 RP11-726G23.6  | K17299 |
| ENSG00000254344 | 5.13E-15 | -2.63127 | 1 | 1 RP11-258J10.1  | -      |
| ENSG00000254345 | 5.13E-15 | -2.63127 | 1 | 1 IGKV2D-23      | -      |
| ENSG00000254346 | 5.13E-15 | -2.63127 | 1 | 1 MTND1P6        | K03878 |
| ENSG00000254347 | 5.13E-15 | -2.63127 | 1 | 1 RP11-351E7.1   | -      |
| ENSG00000254348 | 5.13E-15 | -2.63127 | 1 | 1 RP11-1134I14.4 | -      |
| ENSG00000254349 | 5.13E-15 | -2.63127 | 1 | 1 RP11-758M4.1   | -      |
| ENSG00000254350 | 5.13E-15 | -2.63127 | 1 | 1 RP11-542A14.1  | -      |
| ENSG00000254351 | 5.13E-15 | -2.63127 | 1 | 1 ARL2BPP5       | -      |
| ENSG00000254352 | 5.13E-15 | -2.63127 | 1 | 1                | -      |
| ENSG00000254355 | 5.13E-15 | -2.63127 | 1 | 1 IGLVI-68       | -      |
| ENSG00000254357 | 5.13E-15 | -2.63127 | 1 | 1 RP11-628E19.2  | -      |
| ENSG00000254358 | 5.13E-15 | -2.63127 | 1 | 1 CYCSP22        | K08738 |
| ENSG00000254361 | 5.13E-15 | -2.63127 | 1 | 1 RP11-238K6.2   | -      |
| ENSG00000254364 | 5.13E-15 | -2.63127 | 1 | 1 KB-1615E4.3    | -      |
| ENSG00000254365 | 5.13E-15 | -2.63127 | 1 | 1 CTB-180C19.1   | -      |
| ENSG00000254366 | 5.13E-15 | -2.63127 | 1 | 1 RP11-38H17.1   | -      |
| ENSG00000254367 | 5.13E-15 | -2.63127 | 1 | 1 RP11-211C9.1   | -      |
| ENSG00000254372 | 5.13E-15 | -2.63127 | 1 | 1 RP11-343P9.1   | -      |
| ENSG00000254374 | 5.13E-15 | -2.63127 | 1 | 1 GOLGA6L21P     | K10595 |
| ENSG00000254376 | 5.13E-15 | -2.63127 | 1 | 1 SOX5P          | K09269 |
| ENSG00000254377 | 5.13E-15 | -2.63127 | 1 | 1 LINC00966      | -      |
| ENSG00000254380 | 5.13E-15 | -2.63127 | 1 | 1 RP11-317J10.4  | -      |
| ENSG00000254381 | 5.13E-15 | -2.63127 | 1 | 1 TUBB8P5        | K07375 |
| ENSG00000254383 | 5.13E-15 | -2.63127 | 1 | 1 RP11-465K16.1  | -      |
| ENSG00000254384 | 5.13E-15 | -2.63127 | 1 | 1 MTND6P19       | K03884 |
| ENSG00000254387 | 5.13E-15 | -2.63127 | 1 | 1 RP3-388N13.2   | K12757 |
| ENSG00000254391 | 5.13E-15 | -2.63127 | 1 | 1 CTC-529G1.1    | -      |
| ENSG00000254392 | 5.13E-15 | -2.63127 | 1 | 1 RP11-759A9.2   | K03901 |
| ENSG00000254394 | 5.13E-15 | -2.63127 | 1 | 1 CTD-2272D18.1  | -      |
| ENSG00000254395 | 5.13E-15 | -2.63127 | 1 | 1 IGHV4-55       | K06856 |
| ENSG00000254396 | 5.13E-15 | -2.63127 | 1 | 1 RP11-56F10.3   | -      |
| ENSG00000254398 | 5.13E-15 | -2.63127 | 1 | 1 RP11-578F21.2  | K10595 |
| ENSG00000254399 | 5.13E-15 | -2.63127 | 1 | 1 GLYATL1P4      | -      |
| ENSG00000254400 | 5.13E-15 | -2.63127 | 1 | 1 RP11-732A19.8  | -      |
| ENSG00000254401 | 5.13E-15 | -2.63127 | 1 | 1 RP11-179A10.1  | -      |
| ENSG00000254402 | 5.13E-15 | -2.63127 | 1 | 1 LRRC24         | -      |
| ENSG00000254403 | 5.13E-15 | -2.63127 | 1 | 1 OR10Y1P        | -      |

|                 |          |          |   |                  |        |
|-----------------|----------|----------|---|------------------|--------|
| ENSG00000254404 | 5.13E-15 | -2.63127 | 1 | 1 RP11-703H8.9   | -      |
| ENSG00000254406 | 5.13E-15 | -2.63127 | 1 | 1 RP11-215D10.1  | K12812 |
| ENSG00000254407 | 5.13E-15 | -2.63127 | 1 | 1 RP11-109E10.2  | -      |
| ENSG00000254408 | 5.13E-15 | -2.63127 | 1 | 1 OR4A1P         | K04257 |
| ENSG00000254411 | 5.13E-15 | -2.63127 | 1 | 1 CTD-3051L14.13 | K05611 |
| ENSG00000254412 | 5.13E-15 | -2.63127 | 1 | 1 RP11-107P7.6   | -      |
| ENSG00000254413 | 5.13E-15 | -2.63127 | 1 | 1 CHKB-CPT1B     | K19523 |
| ENSG00000254415 | 5.13E-15 | -2.63127 | 1 | 1 SIGLEC14       | K06549 |
| ENSG00000254417 | 5.13E-15 | -2.63127 | 1 | 1 ANO1-AS2       | -      |
| ENSG00000254418 | 5.13E-15 | -2.63127 | 1 | 1 RP11-21L19.1   | -      |
| ENSG00000254422 | 5.13E-15 | -2.63127 | 1 | 1 RP11-864G5.3   | -      |
| ENSG00000254423 | 5.13E-15 | -2.63127 | 1 | 1 RP11-351I21.7  | K11845 |
| ENSG00000254424 | 5.13E-15 | -2.63127 | 1 | 1 RP11-810P12.6  | -      |
| ENSG00000254425 | 5.13E-15 | -2.63127 | 1 | 1 RP11-480O10.2  | K11094 |
| ENSG00000254427 | 5.13E-15 | -2.63127 | 1 | 1 RP11-430H10.1  | -      |
| ENSG00000254428 | 5.13E-15 | -2.63127 | 1 | 1 RP11-110I1.11  | -      |
| ENSG00000254430 | 5.13E-15 | -2.63127 | 1 | 1 OR6M3P         | -      |
| ENSG00000254434 | 5.13E-15 | -2.63127 | 1 | 1 CTD-2555I5.1   | -      |
| ENSG00000254436 | 5.13E-15 | -2.63127 | 1 | 1 AP000648.6     | K12019 |
| ENSG00000254437 | 5.13E-15 | -2.63127 | 1 | 1 RP11-170L9.1   | -      |
| ENSG00000254438 | 5.13E-15 | -2.63127 | 1 | 1 RP11-231N3.1   | -      |
| ENSG00000254440 | 5.13E-15 | -2.63127 | 1 | 1 PBOV1          | K17985 |
| ENSG00000254441 | 5.13E-15 | -2.63127 | 1 | 1 RP11-718B12.5  | K03238 |
| ENSG00000254442 | 5.13E-15 | -2.63127 | 1 | 1 AP000859.4     | -      |
| ENSG00000254443 | 5.13E-15 | -2.63127 | 1 | 1 RP11-304C12.3  | -      |
| ENSG00000254444 | 5.13E-15 | -2.63127 | 1 | 1 RP11-290F24.3  | -      |
| ENSG00000254445 | 5.13E-15 | -2.63127 | 1 | 1 HSPB2-C11orf52 | K09543 |
| ENSG00000254447 | 5.13E-15 | -2.63127 | 1 | 1 OR7E11P        | K04257 |
| ENSG00000254450 | 5.13E-15 | -2.63127 | 1 | 1 ALG9-IT1       | -      |
| ENSG00000254451 | 5.13E-15 | -2.63127 | 1 | 1 RP11-560G2.1   | -      |
| ENSG00000254452 | 5.13E-15 | -2.63127 | 1 | 1 RP11-867G23.4  | -      |
| ENSG00000254453 | 5.13E-15 | -2.63127 | 1 | 1 NAV2-AS2       | -      |
| ENSG00000254454 | 5.13E-15 | -2.63127 | 1 | 1 RCC2P6         | -      |
| ENSG00000254455 | 5.13E-15 | -2.63127 | 1 | 1 HIGD1AP10      | -      |
| ENSG00000254456 | 5.13E-15 | -2.63127 | 1 | 1 RP11-405K6.1   | -      |
| ENSG00000254457 | 5.13E-15 | -2.63127 | 1 | 1 OR5D2P         | K04257 |
| ENSG00000254462 | 5.13E-15 | -2.63127 | 1 | 1 TMX2-CTNND1    | K05690 |
| ENSG00000254464 | 5.13E-15 | -2.63127 | 1 | 1 OR4A3P         | K04257 |
| ENSG00000254465 | 5.13E-15 | -2.63127 | 1 | 1 PRKRIRP4       | -      |
| ENSG00000254466 | 5.13E-15 | -2.63127 | 1 | 1 OR4D10         | K04257 |
| ENSG00000254467 | 5.13E-15 | -2.63127 | 1 | 1 RP11-634B22.4  | -      |
| ENSG00000254468 | 5.13E-15 | -2.63127 | 1 | 1 RP11-304M2.6   | -      |
| ENSG00000254471 | 5.13E-15 | -2.63127 | 1 | 1 RP11-885L14.1  | K02605 |
| ENSG00000254472 | 5.13E-15 | -2.63127 | 1 | 1 OR4A49P        | K04257 |
| ENSG00000254475 | 5.13E-15 | -2.63127 | 1 | 1 OR2AT1P        | K04257 |
| ENSG00000254480 | 5.13E-15 | -2.63127 | 1 | 1 RP11-23F23.2   | -      |
| ENSG00000254481 | 5.13E-15 | -2.63127 | 1 | 1 PTP4A2P2       | K18041 |
| ENSG00000254482 | 5.13E-15 | -2.63127 | 1 | 1 RP11-386B1.1   | -      |
| ENSG00000254483 | 5.13E-15 | -2.63127 | 1 | 1 RP11-23J9.6    | K12795 |
| ENSG00000254484 | 5.13E-15 | -2.63127 | 1 | 1 CTA-797E19.1   | -      |
| ENSG00000254486 | 5.13E-15 | -2.63127 | 1 | 1 RP13-631K18.2  | -      |
| ENSG00000254487 | 5.13E-15 | -2.63127 | 1 | 1 RP11-707M1.7   | -      |
| ENSG00000254488 | 5.13E-15 | -2.63127 | 1 | 1 RP11-65G9.1    | -      |
| ENSG00000254489 | 5.13E-15 | -2.63127 | 1 | 1 RP5-1024C24.1  | -      |
| ENSG00000254490 | 5.13E-15 | -2.63127 | 1 | 1 OR5M7P         | K04257 |
| ENSG00000254491 | 5.13E-15 | -2.63127 | 1 | 1 RP11-145O15.2  | -      |
| ENSG00000254492 | 5.13E-15 | -2.63127 | 1 | 1 KB-1073A2.1    | K18193 |
| ENSG00000254495 | 5.13E-15 | -2.63127 | 1 | 1 AP000487.4     | -      |

|                 |          |          |   |                  |        |
|-----------------|----------|----------|---|------------------|--------|
| ENSG00000254496 | 5.13E-15 | -2.63127 | 1 | 1 CBX3P8         | K11586 |
| ENSG00000254497 | 5.13E-15 | -2.63127 | 1 | 1 CTD-2560E9.5   | -      |
| ENSG00000254498 | 5.13E-15 | -2.63127 | 1 | 1 CTD-2119L1.1   | -      |
| ENSG00000254499 | 5.13E-15 | -2.63127 | 1 | 1 AC002056.5     | -      |
| ENSG00000254500 | 5.13E-15 | -2.63127 | 1 | 1 RANP3          | K07936 |
| ENSG00000254502 | 5.13E-15 | -2.63127 | 1 | 1 FNTAL1         | K05955 |
| ENSG00000254506 | 5.13E-15 | -2.63127 | 1 | 1 RP11-748H22.1  | -      |
| ENSG00000254507 | 5.13E-15 | -2.63127 | 1 | 1 RP11-481A20.10 | K10803 |
| ENSG00000254508 | 5.13E-15 | -2.63127 | 1 | 1 RP11-646J21.5  | -      |
| ENSG00000254511 | 5.13E-15 | -2.63127 | 1 | 1 RP11-876F14.1  | -      |
| ENSG00000254514 | 5.13E-15 | -2.63127 | 1 | 1 RP11-958J22.3  | -      |
| ENSG00000254515 | 5.13E-15 | -2.63127 | 1 | 1 RP11-775A1.2   | K04969 |
| ENSG00000254516 | 5.13E-15 | -2.63127 | 1 | 1 RP11-159D8.1   | -      |
| ENSG00000254517 | 5.13E-15 | -2.63127 | 1 | 1 RP11-56P9.8    | K12019 |
| ENSG00000254518 | 5.13E-15 | -2.63127 | 1 | 1 RP11-347H15.4  | -      |
| ENSG00000254519 | 5.13E-15 | -2.63127 | 1 | 1 CTD-2210P24.1  | -      |
| ENSG00000254521 | 5.13E-15 | -2.63127 | 1 | 1 SIGLEC12       | K10079 |
| ENSG00000254522 | 5.13E-15 | -2.63127 | 1 | 1 RP11-113K21.1  | K02866 |
| ENSG00000254524 | 5.13E-15 | -2.63127 | 1 | 1 OR8I4P         | K04257 |
| ENSG00000254526 | 5.13E-15 | -2.63127 | 1 | 1 RP11-466I1.1   | -      |
| ENSG00000254527 | 5.13E-15 | -2.63127 | 1 | 1 ENPP7P12       | K12354 |
| ENSG00000254528 | 5.13E-15 | -2.63127 | 1 | 1 RP11-728F11.4  | -      |
| ENSG00000254529 | 5.13E-15 | -2.63127 | 1 | 1 RP11-583F24.7  | K08396 |
| ENSG00000254532 | 5.13E-15 | -2.63127 | 1 | 1 RP11-624D11.2  | -      |
| ENSG00000254533 | 5.13E-15 | -2.63127 | 1 | 1 AF186192.1     | -      |
| ENSG00000254534 | 5.13E-15 | -2.63127 | 1 | 1 RP11-748H22.2  | K17275 |
| ENSG00000254537 | 5.13E-15 | -2.63127 | 1 | 1 RP1-130L23.1   | -      |
| ENSG00000254539 | 5.13E-15 | -2.63127 | 1 | 1 RP4-791M13.3   | -      |
| ENSG00000254540 | 5.13E-15 | -2.63127 | 1 | 1 CTD-2140G10.4  | -      |
| ENSG00000254541 | 5.13E-15 | -2.63127 | 1 | 1 RP11-583F24.6  | K08396 |
| ENSG00000254542 | 5.13E-15 | -2.63127 | 1 | 1 NAV2-AS3       | -      |
| ENSG00000254543 | 5.13E-15 | -2.63127 | 1 | 1 HSPD1P2        | K04077 |
| ENSG00000254545 | 5.13E-15 | -2.63127 | 1 | 1 RP11-84A19.3   | -      |
| ENSG00000254546 | 5.13E-15 | -2.63127 | 1 | 1 RP11-113D6.9   | K08396 |
| ENSG00000254547 | 5.13E-15 | -2.63127 | 1 | 1 RP11-738O11.13 | -      |
| ENSG00000254550 | 5.13E-15 | -2.63127 | 1 | 1 OMP            | -      |
| ENSG00000254551 | 5.13E-15 | -2.63127 | 1 | 1 RP11-727A23.7  | -      |
| ENSG00000254552 | 5.13E-15 | -2.63127 | 1 | 1 XIRP2-AS1      | -      |
| ENSG00000254553 | 5.13E-15 | -2.63127 | 1 | 1 RP1-27O5.3     | K10495 |
| ENSG00000254555 | 5.13E-15 | -2.63127 | 1 | 1 RP11-379J13.1  | -      |
| ENSG00000254556 | 5.13E-15 | -2.63127 | 1 | 1 AF131215.4     | -      |
| ENSG00000254557 | 5.13E-15 | -2.63127 | 1 | 1 RP11-102F4.2   | -      |
| ENSG00000254558 | 5.13E-15 | -2.63127 | 1 | 1 RP11-81M19.3   | -      |
| ENSG00000254559 | 5.13E-15 | -2.63127 | 1 | 1 RP11-304M2.5   | -      |
| ENSG00000254560 | 5.13E-15 | -2.63127 | 1 | 1 RP11-1L12.3    | -      |
| ENSG00000254561 | 5.13E-15 | -2.63127 | 1 | 1 RP11-196E1.3   | -      |
| ENSG00000254562 | 5.13E-15 | -2.63127 | 1 | 1 RP11-64I17.1   | -      |
| ENSG00000254563 | 5.13E-15 | -2.63127 | 1 | 1 RP11-673F18.1  | -      |
| ENSG00000254564 | 5.13E-15 | -2.63127 | 1 | 1 RP11-787P24.2  | K19607 |
| ENSG00000254565 | 5.13E-15 | -2.63127 | 1 | 1 MTND2P26       | -      |
| ENSG00000254566 | 5.13E-15 | -2.63127 | 1 | 1 RP11-514F3.4   | -      |
| ENSG00000254567 | 5.13E-15 | -2.63127 | 1 | 1 RP11-107P7.4   | -      |
| ENSG00000254568 | 5.13E-15 | -2.63127 | 1 | 1 RP11-664I21.5  | -      |
| ENSG00000254569 | 5.13E-15 | -2.63127 | 1 | 1 RP11-693N9.1   | K10408 |
| ENSG00000254571 | 5.13E-15 | -2.63127 | 1 | 1 RP11-60I3.4    | -      |
| ENSG00000254572 | 5.13E-15 | -2.63127 | 1 | 1 GLULP3         | K01915 |
| ENSG00000254573 | 5.13E-15 | -2.63127 | 1 | 1 AP004550.1     | -      |
| ENSG00000254574 | 5.13E-15 | -2.63127 | 1 | 1 RP11-429J17.4  | -      |

|                 |          |          |   |                  |        |
|-----------------|----------|----------|---|------------------|--------|
| ENSG00000254575 | 5.13E-15 | -2.63127 | 1 | 1 RP11-3G21.1    | —      |
| ENSG00000254576 | 5.13E-15 | -2.63127 | 1 | 1 OR4C1P         | K04257 |
| ENSG00000254578 | 5.13E-15 | -2.63127 | 1 | 1 CTD-2517M22.16 | —      |
| ENSG00000254579 | 5.13E-15 | -2.63127 | 1 | 1 RP11-407P18.1  | K09228 |
| ENSG00000254580 | 5.13E-15 | -2.63127 | 1 | 1 RP11-677I18.4  | —      |
| ENSG00000254581 | 5.13E-15 | -2.63127 | 1 | 1 RP11-303G3.10  | K04257 |
| ENSG00000254582 | 5.13E-15 | -2.63127 | 1 | 1 PSMA2P1        | K02726 |
| ENSG00000254583 | 5.13E-15 | -2.63127 | 1 | 1 RP11-15D14.1   | —      |
| ENSG00000254585 | 5.13E-15 | -2.63127 | 1 | 1 MAGEL2         | —      |
| ENSG00000254586 | 5.13E-15 | -2.63127 | 1 | 1 RP11-358H18.3  | —      |
| ENSG00000254587 | 5.13E-15 | -2.63127 | 1 | 1 RP11-360K13.1  | —      |
| ENSG00000254588 | 5.13E-15 | -2.63127 | 1 | 1 RP11-1007G5.2  | —      |
| ENSG00000254589 | 5.13E-15 | -2.63127 | 1 | 1 EIF4A2P3       | K03257 |
| ENSG00000254590 | 5.13E-15 | -2.63127 | 1 | 1 RP11-334E6.2   | —      |
| ENSG00000254591 | 5.13E-15 | -2.63127 | 1 | 1 RP11-822P1.1   | —      |
| ENSG00000254592 | 5.13E-15 | -2.63127 | 1 | 1 RP5-1173A5.1   | —      |
| ENSG00000254594 | 5.13E-15 | -2.63127 | 1 | 1 RP11-2F20.1    | —      |
| ENSG00000254596 | 5.13E-15 | -2.63127 | 1 | 1 CTD-3074O7.7   | —      |
| ENSG00000254597 | 5.13E-15 | -2.63127 | 1 | 1 FAM90A10P      | —      |
| ENSG00000254599 | 5.13E-15 | -2.63127 | 1 | 1 RP11-115E19.1  | —      |
| ENSG00000254601 | 5.13E-15 | -2.63127 | 1 | 1 CYCSP26        | K08738 |
| ENSG00000254603 | 5.13E-15 | -2.63127 | 1 | 1 OR5M6P         | K04257 |
| ENSG00000254605 | 5.13E-15 | -2.63127 | 1 | 1 RP11-626H12.2  | —      |
| ENSG00000254606 | 5.13E-15 | -2.63127 | 1 | 1 RP11-22P4.2    | —      |
| ENSG00000254607 | 5.13E-15 | -2.63127 | 1 | 1 RP11-115C10.1  | —      |
| ENSG00000254608 | 5.13E-15 | -2.63127 | 1 | 1 RP11-56A10.1   | K19538 |
| ENSG00000254609 | 5.13E-15 | -2.63127 | 1 | 1 RP11-719K4.3   | K01047 |
| ENSG00000254610 | 5.13E-15 | -2.63127 | 1 | 1 RP5-903G2.2    | —      |
| ENSG00000254613 | 5.13E-15 | -2.63127 | 1 | 1 OR6M2P         | K04257 |
| ENSG00000254615 | 5.13E-15 | -2.63127 | 1 | 1 RP11-395G23.3  | —      |
| ENSG00000254616 | 5.13E-15 | -2.63127 | 1 | 1 RP11-700F16.2  | —      |
| ENSG00000254617 | 5.13E-15 | -2.63127 | 1 | 1 AP000648.3     | K12019 |
| ENSG00000254618 | 5.13E-15 | -2.63127 | 1 | 1 TMED10P1       | —      |
| ENSG00000254620 | 5.13E-15 | -2.63127 | 1 | 1 RP5-907D15.3   | —      |
| ENSG00000254621 | 5.13E-15 | -2.63127 | 1 | 1 SETP16         | K11290 |
| ENSG00000254622 | 5.13E-15 | -2.63127 | 1 | 1 NAV2-AS4       | —      |
| ENSG00000254623 | 5.13E-15 | -2.63127 | 1 | 1 DEFB108P4      | —      |
| ENSG00000254624 | 5.13E-15 | -2.63127 | 1 | 1 OR4R3P         | K04257 |
| ENSG00000254625 | 5.13E-15 | -2.63127 | 1 | 1 GS1-24F4.3     | —      |
| ENSG00000254626 | 5.13E-15 | -2.63127 | 1 | 1 RP11-27G22.1   | —      |
| ENSG00000254627 | 5.13E-15 | -2.63127 | 1 | 1 RP1-17K7.1     | —      |
| ENSG00000254629 | 5.13E-15 | -2.63127 | 1 | 1 RP11-160H12.3  | K04699 |
| ENSG00000254630 | 5.13E-15 | -2.63127 | 1 | 1 CTD-2530H12.7  | —      |
| ENSG00000254631 | 5.13E-15 | -2.63127 | 1 | 1 RP11-702H23.4  | —      |
| ENSG00000254633 | 5.13E-15 | -2.63127 | 1 | 1 RP11-23J9.7    | —      |
| ENSG00000254636 | 5.13E-15 | -2.63127 | 1 | 1 ARMS2          | —      |
| ENSG00000254637 | 5.13E-15 | -2.63127 | 1 | 1 OR4A18P        | K04257 |
| ENSG00000254638 | 5.13E-15 | -2.63127 | 1 | 1 RP11-356J5.4   | —      |
| ENSG00000254640 | 5.13E-15 | -2.63127 | 1 | 1 RP11-384C21.9  | K17985 |
| ENSG00000254641 | 5.13E-15 | -2.63127 | 1 | 1 RP11-732A19.2  | —      |
| ENSG00000254642 | 5.13E-15 | -2.63127 | 1 | 1 COX6CP5        | —      |
| ENSG00000254644 | 5.13E-15 | -2.63127 | 1 | 1 RP11-5A11.2    | K15152 |
| ENSG00000254645 | 5.13E-15 | -2.63127 | 1 | 1 RP11-396O20.2  | —      |
| ENSG00000254646 | 5.13E-15 | -2.63127 | 1 | 1 OR8B10P        | K04257 |
| ENSG00000254647 | 5.13E-15 | -2.63127 | 1 | 1 INS            | K04526 |
| ENSG00000254649 | 5.13E-15 | -2.63127 | 1 | 1 RP11-452H21.2  | —      |
| ENSG00000254650 | 5.13E-15 | -2.63127 | 1 | 1 RP11-665E10.5  | —      |
| ENSG00000254651 | 5.13E-15 | -2.63127 | 1 | 1 RP11-430H10.3  | —      |

|                 |          |          |   |                  |        |
|-----------------|----------|----------|---|------------------|--------|
| ENSG00000254653 | 5.13E-15 | -2.63127 | 1 | 1 RP11-702F3.1   | -      |
| ENSG00000254654 | 5.13E-15 | -2.63127 | 1 | 1 AC068858.1     | -      |
| ENSG00000254655 | 5.13E-15 | -2.63127 | 1 | 1 RP11-529A4.5   | -      |
| ENSG00000254656 | 5.13E-15 | -2.63127 | 1 | 1 RTL1           | -      |
| ENSG00000254658 | 5.13E-15 | -2.63127 | 1 | 1 OR8J2          | K04257 |
| ENSG00000254659 | 5.13E-15 | -2.63127 | 1 | 1 RP11-262A12.1  | -      |
| ENSG00000254660 | 5.13E-15 | -2.63127 | 1 | 1 CTD-3051L14.14 | -      |
| ENSG00000254661 | 5.13E-15 | -2.63127 | 1 | 1 RP11-222N13.1  | -      |
| ENSG00000254663 | 5.13E-15 | -2.63127 | 1 | 1 OR4A11P        | K04257 |
| ENSG00000254665 | 5.13E-15 | -2.63127 | 1 | 1 RP11-152H18.3  | -      |
| ENSG00000254668 | 5.13E-15 | -2.63127 | 1 | 1 RP11-375D13.1  | -      |
| ENSG00000254669 | 5.13E-15 | -2.63127 | 1 | 1 RP5-945I17.2   | -      |
| ENSG00000254673 | 5.13E-15 | -2.63127 | 1 | 1 RP11-598P20.5  | K05955 |
| ENSG00000254674 | 5.13E-15 | -2.63127 | 1 | 1 OR4A42P        | K04257 |
| ENSG00000254675 | 5.13E-15 | -2.63127 | 1 | 1 RP11-7I15.4    | -      |
| ENSG00000254677 | 5.13E-15 | -2.63127 | 1 | 1 OSBPL9P2       | -      |
| ENSG00000254678 | 5.13E-15 | -2.63127 | 1 | 1 RP11-109L13.5  | -      |
| ENSG00000254680 | 5.13E-15 | -2.63127 | 1 | 1 RP11-265D17.2  | -      |
| ENSG00000254683 | 5.13E-15 | -2.63127 | 1 | 1 AF228730.12    | K11095 |
| ENSG00000254684 | 5.13E-15 | -2.63127 | 1 | 1 RP11-882I15.1  | -      |
| ENSG00000254687 | 5.13E-15 | -2.63127 | 1 | 1 RP11-162D9.3   | -      |
| ENSG00000254689 | 5.13E-15 | -2.63127 | 1 | 1 RP11-354A14.1  | -      |
| ENSG00000254692 | 5.13E-15 | -2.63127 | 1 | 1 TM9SF1         | K17085 |
| ENSG00000254695 | 5.13E-15 | -2.63127 | 1 | 1 RP11-396O20.1  | -      |
| ENSG00000254696 | 5.13E-15 | -2.63127 | 1 | 1 RP11-72M10.7   | -      |
| ENSG00000254697 | 5.13E-15 | -2.63127 | 1 | 1 COPS8P3        | -      |
| ENSG00000254698 | 5.13E-15 | -2.63127 | 1 | 1 RP11-659G9.3   | -      |
| ENSG00000254699 | 5.13E-15 | -2.63127 | 1 | 1 RP11-12D16.2   | -      |
| ENSG00000254700 | 5.13E-15 | -2.63127 | 1 | 1 RP11-1236K1.11 | K10803 |
| ENSG00000254702 | 5.13E-15 | -2.63127 | 1 | 1 CTD-2651C21.3  | K17921 |
| ENSG00000254703 | 5.13E-15 | -2.63127 | 1 | 1 SENCRCR        | -      |
| ENSG00000254704 | 5.13E-15 | -2.63127 | 1 | 1 RP11-1036E20.7 | -      |
| ENSG00000254705 | 5.13E-15 | -2.63127 | 1 | 1 RP11-675M1.2   | -      |
| ENSG00000254706 | 5.13E-15 | -2.63127 | 1 | 1 RP11-565P22.6  | K16513 |
| ENSG00000254707 | 5.13E-15 | -2.63127 | 1 | 1 RP11-35J10.4   | -      |
| ENSG00000254708 | 5.13E-15 | -2.63127 | 1 | 1 RP1-145M24.1   | -      |
| ENSG00000254709 | 5.13E-15 | -2.63127 | 1 | 1 IGLL5          | K06554 |
| ENSG00000254712 | 5.13E-15 | -2.63127 | 1 | 1 RP11-560B16.5  | K14291 |
| ENSG00000254713 | 5.13E-15 | -2.63127 | 1 | 1 HNRNPA1P72     | K12741 |
| ENSG00000254714 | 5.13E-15 | -2.63127 | 1 | 1 RP11-163O19.1  | K14592 |
| ENSG00000254715 | 5.13E-15 | -2.63127 | 1 | 1 OR7E154P       | K04257 |
| ENSG00000254717 | 5.13E-15 | -2.63127 | 1 | 1 GLYATL1P2      | -      |
| ENSG00000254720 | 5.13E-15 | -2.63127 | 1 | 1 RP11-583F24.3  | K08396 |
| ENSG00000254721 | 5.13E-15 | -2.63127 | 1 | 1 RP11-805J14.5  | -      |
| ENSG00000254722 | 5.13E-15 | -2.63127 | 1 | 1 FAM8A2P        | -      |
| ENSG00000254723 | 5.13E-15 | -2.63127 | 1 | 1 OR4A12P        | K04257 |
| ENSG00000254724 | 5.13E-15 | -2.63127 | 1 | 1 OR7E10P        | K04257 |
| ENSG00000254725 | 5.13E-15 | -2.63127 | 1 | 1 RP11-111A24.1  | -      |
| ENSG00000254727 | 5.13E-15 | -2.63127 | 1 | 1 PTP4A1P6       | K18041 |
| ENSG00000254728 | 5.13E-15 | -2.63127 | 1 | 1 RP11-56P9.10   | K12019 |
| ENSG00000254733 | 5.13E-15 | -2.63127 | 1 | 1 RP11-317J19.1  | -      |
| ENSG00000254734 | 5.13E-15 | -2.63127 | 1 | 1 CTD-3138F19.1  | -      |
| ENSG00000254735 | 5.13E-15 | -2.63127 | 1 | 1 HMGB1P42       | K10802 |
| ENSG00000254737 | 5.13E-15 | -2.63127 | 1 | 1 OR10G4         | K04257 |
| ENSG00000254738 | 5.13E-15 | -2.63127 | 1 | 1 RP11-583F24.4  | K08396 |
| ENSG00000254743 | 5.13E-15 | -2.63127 | 1 | 1 OR10V3P        | K04257 |
| ENSG00000254744 | 5.13E-15 | -2.63127 | 1 | 1 CTD-3076O17.1  | -      |
| ENSG00000254746 | 5.13E-15 | -2.63127 | 1 | 1 RP11-958J22.1  | -      |

|                 |          |          |   |                  |        |
|-----------------|----------|----------|---|------------------|--------|
| ENSG00000254748 | 5.13E-15 | -2.63127 | 1 | 1 HNRNPCP8       | K12884 |
| ENSG00000254749 | 5.13E-15 | -2.63127 | 1 | 1 OR5BD1P        | -      |
| ENSG00000254750 | 5.13E-15 | -2.63127 | 1 | 1 CASP1P2        | K01370 |
| ENSG00000254751 | 5.13E-15 | -2.63127 | 1 | 1 TRIM64DP       | K12019 |
| ENSG00000254752 | 5.13E-15 | -2.63127 | 1 | 1 OR5M2P         | K04257 |
| ENSG00000254753 | 5.13E-15 | -2.63127 | 1 | 1 RP11-480O10.1  | -      |
| ENSG00000254754 | 5.13E-15 | -2.63127 | 1 | 1 RP11-20J1.1    | -      |
| ENSG00000254755 | 5.13E-15 | -2.63127 | 1 | 1 RP11-672A2.7   | K11294 |
| ENSG00000254757 | 5.13E-15 | -2.63127 | 1 | 1 RP13-726E6.1   | -      |
| ENSG00000254758 | 5.13E-15 | -2.63127 | 1 | 1 AP000889.1     | -      |
| ENSG00000254760 | 5.13E-15 | -2.63127 | 1 | 1 CTD-2616J11.3  | -      |
| ENSG00000254764 | 5.13E-15 | -2.63127 | 1 | 1 TRIM53CP       | K12019 |
| ENSG00000254765 | 5.13E-15 | -2.63127 | 1 | 1 RP11-1H15.1    | K01915 |
| ENSG00000254767 | 5.13E-15 | -2.63127 | 1 | 1 OR2AL1P        | -      |
| ENSG00000254768 | 5.13E-15 | -2.63127 | 1 | 1 CTD-2140G10.2  | -      |
| ENSG00000254769 | 5.13E-15 | -2.63127 | 1 | 1 OR4A4P         | K04257 |
| ENSG00000254770 | 5.13E-15 | -2.63127 | 1 | 1 OR4D7P         | K04257 |
| ENSG00000254771 | 5.13E-15 | -2.63127 | 1 | 1 RP11-50B3.1    | K09448 |
| ENSG00000254774 | 5.13E-15 | -2.63127 | 1 | 1 RP11-148O21.3  | -      |
| ENSG00000254775 | 5.13E-15 | -2.63127 | 1 | 1 RP11-27P7.1    | -      |
| ENSG00000254776 | 5.13E-15 | -2.63127 | 1 | 1 AC084121.17    | -      |
| ENSG00000254779 | 5.13E-15 | -2.63127 | 1 | 1 EGLN1P1        | K09592 |
| ENSG00000254781 | 5.13E-15 | -2.63127 | 1 | 1 GVINP2         | -      |
| ENSG00000254782 | 5.13E-15 | -2.63127 | 1 | 1 RP11-155D18.12 | -      |
| ENSG00000254784 | 5.13E-15 | -2.63127 | 1 | 1 RP11-436H16.1  | -      |
| ENSG00000254785 | 5.13E-15 | -2.63127 | 1 | 1 RP11-81M19.1   | -      |
| ENSG00000254786 | 5.13E-15 | -2.63127 | 1 | 1 RP11-142C4.5   | -      |
| ENSG00000254787 | 5.13E-15 | -2.63127 | 1 | 1 CTD-2537O9.1   | -      |
| ENSG00000254789 | 5.13E-15 | -2.63127 | 1 | 1 RP11-531H8.2   | -      |
| ENSG00000254790 | 5.13E-15 | -2.63127 | 1 | 1 RP11-680F20.4  | -      |
| ENSG00000254792 | 5.13E-15 | -2.63127 | 1 | 1 RP11-119D9.4   | -      |
| ENSG00000254793 | 5.13E-15 | -2.63127 | 1 | 1 FDPSP4         | K00787 |
| ENSG00000254794 | 5.13E-15 | -2.63127 | 1 | 1 RP11-665E10.3  | -      |
| ENSG00000254795 | 5.13E-15 | -2.63127 | 1 | 1 OR5AP1P        | K04257 |
| ENSG00000254796 | 5.13E-15 | -2.63127 | 1 | 1 RP11-1118M6.2  | K04257 |
| ENSG00000254798 | 5.13E-15 | -2.63127 | 1 | 1 TFAMP2         | K11830 |
| ENSG00000254799 | 5.13E-15 | -2.63127 | 1 | 1 SLC25A47P1     | K15123 |
| ENSG00000254800 | 5.13E-15 | -2.63127 | 1 | 1 RP11-163O19.3  | K12019 |
| ENSG00000254801 | 5.13E-15 | -2.63127 | 1 | 1 CTD-2132H18.3  | K11268 |
| ENSG00000254802 | 5.13E-15 | -2.63127 | 1 | 1 AC022182.3     | -      |
| ENSG00000254803 | 5.13E-15 | -2.63127 | 1 | 1 RP11-529A4.9   | -      |
| ENSG00000254804 | 5.13E-15 | -2.63127 | 1 | 1 RP11-674C21.9  | -      |
| ENSG00000254805 | 5.13E-15 | -2.63127 | 1 | 1 RP11-167J8.4   | K11095 |
| ENSG00000254807 | 5.13E-15 | -2.63127 | 1 | 1 OR10AK1P       | -      |
| ENSG00000254810 | 5.13E-15 | -2.63127 | 1 | 1 RP11-672A2.4   | -      |
| ENSG00000254811 | 5.13E-15 | -2.63127 | 1 | 1 RP11-680E19.1  | K09228 |
| ENSG00000254813 | 5.13E-15 | -2.63127 | 1 | 1 RP11-252C15.1  | -      |
| ENSG00000254814 | 5.13E-15 | -2.63127 | 1 | 1 RP11-535A19.1  | -      |
| ENSG00000254816 | 5.13E-15 | -2.63127 | 1 | 1 RP11-670N15.2  | -      |
| ENSG00000254817 | 5.13E-15 | -2.63127 | 1 | 1 OR7E160P       | K04257 |
| ENSG00000254818 | 5.13E-15 | -2.63127 | 1 | 1 RP11-529A4.4   | -      |
| ENSG00000254819 | 5.13E-15 | -2.63127 | 1 | 1 RP11-430L3.1   | -      |
| ENSG00000254820 | 5.13E-15 | -2.63127 | 1 | 1 CTD-2019O4.1   | -      |
| ENSG00000254821 | 5.13E-15 | -2.63127 | 1 | 1 RP3-400B16.4   | -      |
| ENSG00000254822 | 5.13E-15 | -2.63127 | 1 | 1 RP11-375D13.3  | -      |
| ENSG00000254823 | 5.13E-15 | -2.63127 | 1 | 1 RP11-109E10.1  | -      |
| ENSG00000254824 | 5.13E-15 | -2.63127 | 1 | 1 RP11-370I6.8   | -      |
| ENSG00000254825 | 5.13E-15 | -2.63127 | 1 | 1 OR9G2P         | K04257 |

|                 |          |          |   |                  |        |
|-----------------|----------|----------|---|------------------|--------|
| ENSG00000254828 | 5.13E-15 | -2.63127 | 1 | 1 RP11-72M10.5   | K12019 |
| ENSG00000254829 | 5.13E-15 | -2.63127 | 1 | 1 RP11-7I15.3    | -      |
| ENSG00000254830 | 5.13E-15 | -2.63127 | 1 | 1 RP11-99C10.1   | -      |
| ENSG00000254831 | 5.13E-15 | -2.63127 | 1 | 1 KRT18P58       | K07604 |
| ENSG00000254832 | 5.13E-15 | -2.63127 | 1 | 1 OR4A40P        | K04257 |
| ENSG00000254834 | 5.13E-15 | -2.63127 | 1 | 1 OR5M10         | K04257 |
| ENSG00000254835 | 5.13E-15 | -2.63127 | 1 | 1 RNF185-AS1     | -      |
| ENSG00000254836 | 5.13E-15 | -2.63127 | 1 | 1 RP1-17K7.3     | -      |
| ENSG00000254839 | 5.13E-15 | -2.63127 | 1 | 1 AF131215.6     | -      |
| ENSG00000254840 | 5.13E-15 | -2.63127 | 1 | 1 RP11-574M7.1   | K03121 |
| ENSG00000254841 | 5.13E-15 | -2.63127 | 1 | 1 OR4V1P         | K04257 |
| ENSG00000254843 | 5.13E-15 | -2.63127 | 1 | 1 RP11-648O15.1  | K04725 |
| ENSG00000254844 | 5.13E-15 | -2.63127 | 1 | 1 RP11-728F11.3  | -      |
| ENSG00000254845 | 5.13E-15 | -2.63127 | 1 | 1 OR8G7P         | K04257 |
| ENSG00000254846 | 5.13E-15 | -2.63127 | 1 | 1 RP11-203M5.2   | -      |
| ENSG00000254848 | 5.13E-15 | -2.63127 | 1 | 1 OR5BN1P        | K04257 |
| ENSG00000254850 | 5.13E-15 | -2.63127 | 1 | 1 RP5-901A4.4    | K02974 |
| ENSG00000254853 | 5.13E-15 | -2.63127 | 1 | 1 RP11-659P15.2  | K15430 |
| ENSG00000254855 | 5.13E-15 | -2.63127 | 1 | 1 RP11-867G23.1  | -      |
| ENSG00000254856 | 5.13E-15 | -2.63127 | 1 | 1 NDUFA3P2       | -      |
| ENSG00000254857 | 5.13E-15 | -2.63127 | 1 | 1 RP11-113D6.3   | K08396 |
| ENSG00000254861 | 5.13E-15 | -2.63127 | 1 | 1 RP11-945A11.2  | -      |
| ENSG00000254863 | 5.13E-15 | -2.63127 | 1 | 1 RP11-831A10.2  | -      |
| ENSG00000254864 | 5.13E-15 | -2.63127 | 1 | 1 CTD-2516F10.4  | -      |
| ENSG00000254865 | 5.13E-15 | -2.63127 | 1 | 1 RP11-748C4.1   | -      |
| ENSG00000254866 | 5.13E-15 | -2.63127 | 1 | 1 DEFB109P3      | -      |
| ENSG00000254867 | 5.13E-15 | -2.63127 | 1 | 1 RP11-1167A19.6 | -      |
| ENSG00000254869 | 5.13E-15 | -2.63127 | 1 | 1 RP11-91I20.2   | -      |
| ENSG00000254870 | 5.13E-15 | -2.63127 | 1 | 1 ATP6V1G2-DDX39 | K12812 |
| ENSG00000254871 | 5.13E-15 | -2.63127 | 1 | 1 RP11-702F3.2   | -      |
| ENSG00000254873 | 5.13E-15 | -2.63127 | 1 | 1 RP11-770J1.5   | -      |
| ENSG00000254874 | 5.13E-15 | -2.63127 | 1 | 1 RP11-676F20.1  | -      |
| ENSG00000254877 | 5.13E-15 | -2.63127 | 1 | 1 RP11-142C4.4   | -      |
| ENSG00000254878 | 5.13E-15 | -2.63127 | 1 | 1 CTD-3096P4.1   | -      |
| ENSG00000254880 | 5.13E-15 | -2.63127 | 1 | 1 RP11-687M24.5  | -      |
| ENSG00000254883 | 5.13E-15 | -2.63127 | 1 | 1 RP11-655M14.14 | -      |
| ENSG00000254885 | 5.13E-15 | -2.63127 | 1 | 1 RP11-802F5.1   | -      |
| ENSG00000254886 | 5.13E-15 | -2.63127 | 1 | 1 OR4A10P        | K04257 |
| ENSG00000254887 | 5.13E-15 | -2.63127 | 1 | 1 CTC-378H22.1   | -      |
| ENSG00000254888 | 5.13E-15 | -2.63127 | 1 | 1 RP11-716D19.1  | K11268 |
| ENSG00000254889 | 5.13E-15 | -2.63127 | 1 | 1 AC084121.14    | K04257 |
| ENSG00000254890 | 5.13E-15 | -2.63127 | 1 | 1 RP11-10A7.1    | -      |
| ENSG00000254891 | 5.13E-15 | -2.63127 | 1 | 1 OR4A9P         | K04257 |
| ENSG00000254892 | 5.13E-15 | -2.63127 | 1 | 1 RP11-334E6.4   | -      |
| ENSG00000254894 | 5.13E-15 | -2.63127 | 1 | 1 NAV2-AS1       | -      |
| ENSG00000254895 | 5.13E-15 | -2.63127 | 1 | 1 RP11-37O16.7   | -      |
| ENSG00000254896 | 5.13E-15 | -2.63127 | 1 | 1 OPCML-IT1      | -      |
| ENSG00000254897 | 5.13E-15 | -2.63127 | 1 | 1 RP11-482L11.1  | K13184 |
| ENSG00000254900 | 5.13E-15 | -2.63127 | 1 | 1 RP11-152H18.4  | -      |
| ENSG00000254902 | 5.13E-15 | -2.63127 | 1 | 1 ANO1-AS1       | -      |
| ENSG00000254903 | 5.13E-15 | -2.63127 | 1 | 1 OR8L1P         | K04257 |
| ENSG00000254906 | 5.13E-15 | -2.63127 | 1 | 1 RP11-701I24.3  | -      |
| ENSG00000254909 | 5.13E-15 | -2.63127 | 1 | 1 RP11-110I1.5   | -      |
| ENSG00000254912 | 5.13E-15 | -2.63127 | 1 | 1 RP11-632K20.2  | K14559 |
| ENSG00000254913 | 5.13E-15 | -2.63127 | 1 | 1 RP4-791M13.5   | -      |
| ENSG00000254914 | 5.13E-15 | -2.63127 | 1 | 1 CTD-2537L20.1  | -      |
| ENSG00000254915 | 5.13E-15 | -2.63127 | 1 | 1 RP11-263C24.3  | -      |
| ENSG00000254916 | 5.13E-15 | -2.63127 | 1 | 1 RP11-529A4.12  | -      |

|                 |          |          |   |                  |        |
|-----------------|----------|----------|---|------------------|--------|
| ENSG00000254917 | 5.13E-15 | -2.63127 | 1 | 1 OR7E15P        | K04257 |
| ENSG00000254919 | 5.13E-15 | -2.63127 | 1 | 1 RP11-698N11.2  | -      |
| ENSG00000254920 | 5.13E-15 | -2.63127 | 1 | 1 RP11-56P9.6    | -      |
| ENSG00000254921 | 5.13E-15 | -2.63127 | 1 | 1 RP11-236J17.6  | -      |
| ENSG00000254923 | 5.13E-15 | -2.63127 | 1 | 1 RP11-1236K1.8  | K11845 |
| ENSG00000254924 | 5.13E-15 | -2.63127 | 1 | 1 RP11-684B2.3   | -      |
| ENSG00000254925 | 5.13E-15 | -2.63127 | 1 | 1 OR4C9P         | K04257 |
| ENSG00000254926 | 5.13E-15 | -2.63127 | 1 | 1 AP000445.2     | K15517 |
| ENSG00000254927 | 5.13E-15 | -2.63127 | 1 | 1 RP11-98J9.2    | -      |
| ENSG00000254928 | 5.13E-15 | -2.63127 | 1 | 1 RP11-702H23.6  | -      |
| ENSG00000254929 | 5.13E-15 | -2.63127 | 1 | 1 RP11-144G6.12  | -      |
| ENSG00000254930 | 5.13E-15 | -2.63127 | 1 | 1 RP11-98J9.3    | -      |
| ENSG00000254931 | 5.13E-15 | -2.63127 | 1 | 1 RP11-37O16.6   | -      |
| ENSG00000254932 | 5.13E-15 | -2.63127 | 1 | 1 RP11-687M24.8  | -      |
| ENSG00000254933 | 5.13E-15 | -2.63127 | 1 | 1 RP11-619A14.2  | -      |
| ENSG00000254934 | 5.13E-15 | -2.63127 | 1 | 1 LINC00678      | -      |
| ENSG00000254935 | 5.13E-15 | -2.63127 | 1 | 1 RP11-266E8.2   | -      |
| ENSG00000254936 | 5.13E-15 | -2.63127 | 1 | 1 AF131215.3     | -      |
| ENSG00000254937 | 5.13E-15 | -2.63127 | 1 | 1 RP11-728D14.6  | -      |
| ENSG00000254938 | 5.13E-15 | -2.63127 | 1 | 1 RP11-688I9.4   | -      |
| ENSG00000254939 | 5.13E-15 | -2.63127 | 1 | 1 CTD-2342I9.1   | K09228 |
| ENSG00000254940 | 5.13E-15 | -2.63127 | 1 | 1 OR4A19P        | K04257 |
| ENSG00000254942 | 5.13E-15 | -2.63127 | 1 | 1 RP5-1160K1.8   | -      |
| ENSG00000254943 | 5.13E-15 | -2.63127 | 1 | 1 RP11-664I21.6  | K06784 |
| ENSG00000254944 | 5.13E-15 | -2.63127 | 1 | 1 ATP5F1P5       | K02127 |
| ENSG00000254946 | 5.13E-15 | -2.63127 | 1 | 1 RP11-531H8.1   | -      |
| ENSG00000254947 | 5.13E-15 | -2.63127 | 1 | 1 OR8K4P         | -      |
| ENSG00000254948 | 5.13E-15 | -2.63127 | 1 | 1 OR7E158P       | K04257 |
| ENSG00000254949 | 5.13E-15 | -2.63127 | 1 | 1 GNG5P3         | K04542 |
| ENSG00000254951 | 5.13E-15 | -2.63127 | 1 | 1 RP11-494M8.4   | -      |
| ENSG00000254952 | 5.13E-15 | -2.63127 | 1 | 1 AP001257.1     | -      |
| ENSG00000254953 | 5.13E-15 | -2.63127 | 1 | 1 RP11-100N3.2   | -      |
| ENSG00000254954 | 5.13E-15 | -2.63127 | 1 | 1 SLC2A13P1      | K08150 |
| ENSG00000254957 | 5.13E-15 | -2.63127 | 1 | 1 RP11-179A10.2  | -      |
| ENSG00000254959 | 5.13E-15 | -2.63127 | 1 | 1 INMT-FAM188B   | K00562 |
| ENSG00000254960 | 5.13E-15 | -2.63127 | 1 | 1 KIRREL3-AS2    | -      |
| ENSG00000254961 | 5.13E-15 | -2.63127 | 1 | 1 TUBB4BP4       | -      |
| ENSG00000254962 | 5.13E-15 | -2.63127 | 1 | 1 OR4A14P        | K04257 |
| ENSG00000254963 | 5.13E-15 | -2.63127 | 1 | 1 CTD-2562J17.9  | -      |
| ENSG00000254965 | 5.13E-15 | -2.63127 | 1 | 1 RP11-113K21.2  | K12592 |
| ENSG00000254966 | 5.13E-15 | -2.63127 | 1 | 1 RP11-1081L13.4 | -      |
| ENSG00000254968 | 5.13E-15 | -2.63127 | 1 | 1 RP11-65M17.3   | -      |
| ENSG00000254971 | 5.13E-15 | -2.63127 | 1 | 1 RP11-313I2.11  | -      |
| ENSG00000254972 | 5.13E-15 | -2.63127 | 1 | 1 RP11-167J8.3   | -      |
| ENSG00000254974 | 5.13E-15 | -2.63127 | 1 | 1 RP11-702H23.2  | K02896 |
| ENSG00000254975 | 5.13E-15 | -2.63127 | 1 | 1 RP11-672A2.3   | -      |
| ENSG00000254976 | 5.13E-15 | -2.63127 | 1 | 1 OR8B7P         | K04257 |
| ENSG00000254977 | 5.13E-15 | -2.63127 | 1 | 1 AC004878.8     | -      |
| ENSG00000254980 | 5.13E-15 | -2.63127 | 1 | 1 RP11-794P6.6   | -      |
| ENSG00000254983 | 5.13E-15 | -2.63127 | 1 | 1 RP11-573E11.2  | -      |
| ENSG00000254987 | 5.13E-15 | -2.63127 | 1 | 1 RP11-563P16.1  | -      |
| ENSG00000254988 | 5.13E-15 | -2.63127 | 1 | 1 CTD-2547H18.1  | -      |
| ENSG00000254989 | 5.13E-15 | -2.63127 | 1 | 1 RP11-469N6.3   | -      |
| ENSG00000254990 | 5.13E-15 | -2.63127 | 1 | 1 RP11-108O10.2  | -      |
| ENSG00000254992 | 5.13E-15 | -2.63127 | 1 | 1 RP11-215H18.5  | K09670 |
| ENSG00000254993 | 5.13E-15 | -2.63127 | 1 | 1 RP11-107P7.5   | K12019 |
| ENSG00000254997 | 5.13E-15 | -2.63127 | 1 | 1 KRTAP5-9       | -      |
| ENSG00000254998 | 5.13E-15 | -2.63127 | 1 | 1 RP11-94P11.4   | -      |



|                 |          |          |   |                 |        |
|-----------------|----------|----------|---|-----------------|--------|
| ENSG00000255000 | 5.13E-15 | -2.63127 | 1 | 1 AC139103.1    | K09228 |
| ENSG00000255001 | 5.13E-15 | -2.63127 | 1 | 1 RP11-347H15.3 | -      |
| ENSG00000255002 | 5.13E-15 | -2.63127 | 1 | 1 CTD-2509G16.2 | -      |
| ENSG00000255003 | 5.13E-15 | -2.63127 | 1 | 1 CYCSP28       | K08738 |
| ENSG00000255004 | 5.13E-15 | -2.63127 | 1 | 1 RP1-68D18.3   | -      |
| ENSG00000255005 | 5.13E-15 | -2.63127 | 1 | 1 RP11-90K17.2  | -      |
| ENSG00000255006 | 5.13E-15 | -2.63127 | 1 | 1 TCEB1P22      | K03872 |
| ENSG00000255009 | 5.13E-15 | -2.63127 | 1 | 1 UBTFL1        | -      |
| ENSG00000255011 | 5.13E-15 | -2.63127 | 1 | 1 RP11-529A4.10 | K12019 |
| ENSG00000255012 | 5.13E-15 | -2.63127 | 1 | 1 OR5M1         | K04257 |
| ENSG00000255014 | 5.13E-15 | -2.63127 | 1 | 1 ARL6IP1P3     | -      |
| ENSG00000255016 | 5.13E-15 | -2.63127 | 1 | 1 RP11-481A20.8 | K04257 |
| ENSG00000255018 | 5.13E-15 | -2.63127 | 1 | 1 RP11-413N13.1 | -      |
| ENSG00000255019 | 5.13E-15 | -2.63127 | 1 | 1 OR5D15P       | K04257 |
| ENSG00000255020 | 5.13E-15 | -2.63127 | 1 | 1 AF131216.5    | -      |
| ENSG00000255021 | 5.13E-15 | -2.63127 | 1 | 1 RP11-536I6.2  | -      |
| ENSG00000255022 | 5.13E-15 | -2.63127 | 1 | 1 RP11-665E10.1 | -      |
| ENSG00000255025 | 5.13E-15 | -2.63127 | 1 | 1 AF228730.13   | K04257 |
| ENSG00000255027 | 5.13E-15 | -2.63127 | 1 | 1 RP11-680F20.9 | -      |
| ENSG00000255028 | 5.13E-15 | -2.63127 | 1 | 1 RP11-708B6.2  | -      |
| ENSG00000255029 | 5.13E-15 | -2.63127 | 1 | 1 CTD-3012A18.1 | -      |
| ENSG00000255030 | 5.13E-15 | -2.63127 | 1 | 1 OR8B5P        | K04257 |
| ENSG00000255032 | 5.13E-15 | -2.63127 | 1 | 1 RP11-45A12.2  | -      |
| ENSG00000255033 | 5.13E-15 | -2.63127 | 1 | 1 RP11-1101K5.2 | -      |
| ENSG00000255035 | 5.13E-15 | -2.63127 | 1 | 1 SDHCP4        | K00236 |
| ENSG00000255037 | 5.13E-15 | -2.63127 | 1 | 1 RP11-680G24.1 | K01047 |
| ENSG00000255039 | 5.13E-15 | -2.63127 | 1 | 1 RP11-882G5.1  | -      |
| ENSG00000255040 | 5.13E-15 | -2.63127 | 1 | 1 RP11-677N16.1 | K11339 |
| ENSG00000255041 | 5.13E-15 | -2.63127 | 1 | 1 RP11-430H10.4 | -      |
| ENSG00000255042 | 5.13E-15 | -2.63127 | 1 | 1 RP11-347H15.5 | K16944 |
| ENSG00000255043 | 5.13E-15 | -2.63127 | 1 | 1 NAV2-AS5      | -      |
| ENSG00000255047 | 5.13E-15 | -2.63127 | 1 | 1 HNRNPRP2      | -      |
| ENSG00000255048 | 5.13E-15 | -2.63127 | 1 | 1 OR8X1P        | -      |
| ENSG00000255051 | 5.13E-15 | -2.63127 | 1 | 1 BCAS2P1       | K12861 |
| ENSG00000255052 | 5.13E-15 | -2.63127 | 1 | 1 FAM66D        | -      |
| ENSG00000255053 | 5.13E-15 | -2.63127 | 1 | 1 OR4A44P       | K04257 |
| ENSG00000255054 | 5.13E-15 | -2.63127 | 1 | 1 RP1-317E23.6  | -      |
| ENSG00000255055 | 5.13E-15 | -2.63127 | 1 | 1 MTND1P35      | -      |
| ENSG00000255057 | 5.13E-15 | -2.63127 | 1 | 1 RP11-567M21.3 | K17985 |
| ENSG00000255058 | 5.13E-15 | -2.63127 | 1 | 1 AP003068.17   | -      |
| ENSG00000255059 | 5.13E-15 | -2.63127 | 1 | 1 AP000620.1    | K03767 |
| ENSG00000255060 | 5.13E-15 | -2.63127 | 1 | 1 RP11-219O3.2  | -      |
| ENSG00000255063 | 5.13E-15 | -2.63127 | 1 | 1 RP11-718B12.1 | K12885 |
| ENSG00000255065 | 5.13E-15 | -2.63127 | 1 | 1 RP11-680E19.2 | K03267 |
| ENSG00000255067 | 5.13E-15 | -2.63127 | 1 | 1 RP11-47J17.1  | -      |
| ENSG00000255069 | 5.13E-15 | -2.63127 | 1 | 1 RP11-145O15.3 | -      |
| ENSG00000255070 | 5.13E-15 | -2.63127 | 1 | 1 OSBPL9P3      | -      |
| ENSG00000255071 | 5.13E-15 | -2.63127 | 1 | 1 SAA2-SAA4     | -      |
| ENSG00000255072 | 5.13E-15 | -2.63127 | 1 | 1 PIGY          | K11001 |
| ENSG00000255073 | 5.13E-15 | -2.63127 | 1 | 1 ZFP91-CNTF    | K05420 |
| ENSG00000255074 | 5.13E-15 | -2.63127 | 1 | 1 RP11-140L24.3 | K02872 |
| ENSG00000255075 | 5.13E-15 | -2.63127 | 1 | 1 RP11-23B7.3   | K11513 |
| ENSG00000255076 | 5.13E-15 | -2.63127 | 1 | 1 CTD-2023J5.1  | -      |
| ENSG00000255077 | 5.13E-15 | -2.63127 | 1 | 1 OR4X7P        | -      |
| ENSG00000255078 | 5.13E-15 | -2.63127 | 1 | 1 OR4A6P        | K04257 |
| ENSG00000255079 | 5.13E-15 | -2.63127 | 1 | 1 RP11-45A12.1  | -      |
| ENSG00000255080 | 5.13E-15 | -2.63127 | 1 | 1 RP11-1082L8.3 | -      |
| ENSG00000255081 | 5.13E-15 | -2.63127 | 1 | 1 RP11-263C24.1 | -      |

|                 |          |          |   |                  |        |
|-----------------|----------|----------|---|------------------|--------|
| ENSG00000255082 | 5.13E-15 | -2.63127 | 1 | 1 GRM5-AS1       | -      |
| ENSG00000255083 | 5.13E-15 | -2.63127 | 1 | 1 OR5AK1P        | K04257 |
| ENSG00000255084 | 5.13E-15 | -2.63127 | 1 | 1 RP11-843A23.1  | -      |
| ENSG00000255086 | 5.13E-15 | -2.63127 | 1 | 1 RP11-336F14.1  | K04532 |
| ENSG00000255087 | 5.13E-15 | -2.63127 | 1 | 1 RP11-168K9.2   | -      |
| ENSG00000255088 | 5.13E-15 | -2.63127 | 1 | 1 RP11-23B7.4    | -      |
| ENSG00000255089 | 5.13E-15 | -2.63127 | 1 | 1 RP11-326C3.10  | -      |
| ENSG00000255091 | 5.13E-15 | -2.63127 | 1 | 1 RP11-495O11.1  | -      |
| ENSG00000255093 | 5.13E-15 | -2.63127 | 1 | 1 RP11-794P6.2   | -      |
| ENSG00000255095 | 5.13E-15 | -2.63127 | 1 | 1 OR1D4          | K04257 |
| ENSG00000255096 | 5.13E-15 | -2.63127 | 1 | 1 OR5B10P        | K04257 |
| ENSG00000255097 | 5.13E-15 | -2.63127 | 1 | 1 RP11-5L12.1    | -      |
| ENSG00000255098 | 5.13E-15 | -2.63127 | 1 | 1 RP11-481A20.11 | K14946 |
| ENSG00000255099 | 5.13E-15 | -2.63127 | 1 | 1 RP11-25D10.2   | -      |
| ENSG00000255101 | 5.13E-15 | -2.63127 | 1 | 1 RP11-412B14.1  | -      |
| ENSG00000255102 | 5.13E-15 | -2.63127 | 1 | 1 RP11-164N3.2   | -      |
| ENSG00000255104 | 5.13E-15 | -2.63127 | 1 | 1 ZNF286A        | K09228 |
| ENSG00000255105 | 5.13E-15 | -2.63127 | 1 | 1 RP11-5A11.1    | K13784 |
| ENSG00000255106 | 5.13E-15 | -2.63127 | 1 | 1 RP11-58K22.2   | K02936 |
| ENSG00000255107 | 5.13E-15 | -2.63127 | 1 | 1 RP11-159H10.1  | K09558 |
| ENSG00000255109 | 5.13E-15 | -2.63127 | 1 | 1 CTD-2572N17.1  | -      |
| ENSG00000255110 | 5.13E-15 | -2.63127 | 1 | 1 RP11-72M10.8   | -      |
| ENSG00000255111 | 5.13E-15 | -2.63127 | 1 | 1 RP11-163O19.8  | -      |
| ENSG00000255113 | 5.13E-15 | -2.63127 | 1 | 1 OR4A48P        | K04257 |
| ENSG00000255114 | 5.13E-15 | -2.63127 | 1 | 1 RP11-110I1.6   | -      |
| ENSG00000255116 | 5.13E-15 | -2.63127 | 1 | 1 SLC5A4P1       | K14384 |
| ENSG00000255117 | 5.13E-15 | -2.63127 | 1 | 1 RP5-1027O15.1  | -      |
| ENSG00000255118 | 5.13E-15 | -2.63127 | 1 | 1 RP11-703H8.7   | -      |
| ENSG00000255119 | 5.13E-15 | -2.63127 | 1 | 1 RP11-655M14.12 | -      |
| ENSG00000255121 | 5.13E-15 | -2.63127 | 1 | 1 RP11-110I1.12  | -      |
| ENSG00000255122 | 5.13E-15 | -2.63127 | 1 | 1 RP11-303G3.6   | -      |
| ENSG00000255123 | 5.13E-15 | -2.63127 | 1 | 1 MTND5P21       | K03883 |
| ENSG00000255125 | 5.13E-15 | -2.63127 | 1 | 1 RP11-685M7.5   | -      |
| ENSG00000255126 | 5.13E-15 | -2.63127 | 1 | 1 CTD-2531D15.5  | -      |
| ENSG00000255127 | 5.13E-15 | -2.63127 | 1 | 1 RP11-676F20.2  | K03231 |
| ENSG00000255128 | 5.13E-15 | -2.63127 | 1 | 1 HSPD1P3        | K04077 |
| ENSG00000255129 | 5.13E-15 | -2.63127 | 1 | 1 RP11-839D17.3  | -      |
| ENSG00000255130 | 5.13E-15 | -2.63127 | 1 | 1 RP11-396J6.1   | -      |
| ENSG00000255131 | 5.13E-15 | -2.63127 | 1 | 1 OR9L1P         | -      |
| ENSG00000255132 | 5.13E-15 | -2.63127 | 1 | 1 RP11-63C8.1    | -      |
| ENSG00000255133 | 5.13E-15 | -2.63127 | 1 | 1 RP11-646J21.2  | -      |
| ENSG00000255134 | 5.13E-15 | -2.63127 | 1 | 1 OR8K2P         | K04257 |
| ENSG00000255136 | 5.13E-15 | -2.63127 | 1 | 1 CTD-2562J17.4  | -      |
| ENSG00000255138 | 5.13E-15 | -2.63127 | 1 | 1 GLTPP1         | -      |
| ENSG00000255140 | 5.13E-15 | -2.63127 | 1 | 1 OR5BN2P        | -      |
| ENSG00000255143 | 5.13E-15 | -2.63127 | 1 | 1 RP11-805J14.3  | -      |
| ENSG00000255144 | 5.13E-15 | -2.63127 | 1 | 1 RP11-589N15.1  | K18157 |
| ENSG00000255146 | 5.13E-15 | -2.63127 | 1 | 1 RP11-659P15.1  | -      |
| ENSG00000255147 | 5.13E-15 | -2.63127 | 1 | 1 RP11-655M14.4  | -      |
| ENSG00000255148 | 5.13E-15 | -2.63127 | 1 | 1 RP4-791M13.4   | -      |
| ENSG00000255149 | 5.13E-15 | -2.63127 | 1 | 1 RP11-97I14.1   | K00412 |
| ENSG00000255151 | 5.13E-15 | -2.63127 | 1 | 1 GLYATL1P3      | -      |
| ENSG00000255152 | 5.13E-15 | -2.63127 | 1 | 1 MSH5-SAPCD1    | K08741 |
| ENSG00000255154 | 5.13E-15 | -2.63127 | 1 | 1 RPP14          | K14529 |
| ENSG00000255155 | 5.13E-15 | -2.63127 | 1 | 1 RP11-535N6.2   | -      |
| ENSG00000255157 | 5.13E-15 | -2.63127 | 1 | 1 CTD-2313N18.8  | -      |
| ENSG00000255159 | 5.13E-15 | -2.63127 | 1 | 1 RP11-318C2.1   | -      |
| ENSG00000255161 | 5.13E-15 | -2.63127 | 1 | 1 RP11-646J21.7  | K09440 |

|                 |          |          |   |                  |        |
|-----------------|----------|----------|---|------------------|--------|
| ENSG00000255162 | 5.13E-15 | -2.63127 | 1 | 1 RP11-358N4.3   | -      |
| ENSG00000255163 | 5.13E-15 | -2.63127 | 1 | 1 HSPE1P18       | K04078 |
| ENSG00000255164 | 5.13E-15 | -2.63127 | 1 | 1 RP5-1047A19.4  | -      |
| ENSG00000255165 | 5.13E-15 | -2.63127 | 1 | 1 CTD-2609K8.3   | -      |
| ENSG00000255166 | 5.13E-15 | -2.63127 | 1 | 1 RP11-726G23.11 | -      |
| ENSG00000255167 | 5.13E-15 | -2.63127 | 1 | 1 RP11-670N15.1  | -      |
| ENSG00000255168 | 5.13E-15 | -2.63127 | 1 | 1 RP11-458D21.5  | K02599 |
| ENSG00000255170 | 5.13E-15 | -2.63127 | 1 | 1 RP11-313I2.6   | K11268 |
| ENSG00000255171 | 5.13E-15 | -2.63127 | 1 | 1 RP11-375D13.2  | -      |
| ENSG00000255172 | 5.13E-15 | -2.63127 | 1 | 1 OR5AM1P        | K04257 |
| ENSG00000255173 | 5.13E-15 | -2.63127 | 1 | 1 AP003068.12    | -      |
| ENSG00000255174 | 5.13E-15 | -2.63127 | 1 | 1 RP11-481A20.4  | -      |
| ENSG00000255175 | 5.13E-15 | -2.63127 | 1 | 1 RP11-277K23.1  | -      |
| ENSG00000255176 | 5.13E-15 | -2.63127 | 1 | 1 AP002954.3     | -      |
| ENSG00000255177 | 5.13E-15 | -2.63127 | 1 | 1 RP11-532E4.2   | -      |
| ENSG00000255178 | 5.13E-15 | -2.63127 | 1 | 1 RP11-686G23.2  | -      |
| ENSG00000255179 | 5.13E-15 | -2.63127 | 1 | 1 RP11-324J3.1   | -      |
| ENSG00000255181 | 5.13E-15 | -2.63127 | 1 | 1 CCDC166        | -      |
| ENSG00000255183 | 5.13E-15 | -2.63127 | 1 | 1 RP11-720D4.3   | -      |
| ENSG00000255184 | 5.13E-15 | -2.63127 | 1 | 1 RP11-313I2.7   | K12019 |
| ENSG00000255187 | 5.13E-15 | -2.63127 | 1 | 1 RP11-699F16.2  | -      |
| ENSG00000255188 | 5.13E-15 | -2.63127 | 1 | 1 RP11-507F16.1  | -      |
| ENSG00000255189 | 5.13E-15 | -2.63127 | 1 | 1 GLYATL1P1      | -      |
| ENSG00000255190 | 5.13E-15 | -2.63127 | 1 | 1 TRIM51DP       | K12019 |
| ENSG00000255191 | 5.13E-15 | -2.63127 | 1 | 1 RP11-626H12.1  | -      |
| ENSG00000255192 | 5.13E-15 | -2.63127 | 1 | 1 NANOGP8        | K10164 |
| ENSG00000255193 | 5.13E-15 | -2.63127 | 1 | 1 RP11-945A11.1  | -      |
| ENSG00000255194 | 5.13E-15 | -2.63127 | 1 | 1 SSU72P2        | K15544 |
| ENSG00000255196 | 5.13E-15 | -2.63127 | 1 | 1 OR4A17P        | K04257 |
| ENSG00000255199 | 5.13E-15 | -2.63127 | 1 | 1 RP11-227P3.1   | K03121 |
| ENSG00000255202 | 5.13E-15 | -2.63127 | 1 | 1 RP4-541C22.5   | -      |
| ENSG00000255204 | 5.13E-15 | -2.63127 | 1 | 1 RP11-738O11.9  | K12019 |
| ENSG00000255205 | 5.13E-15 | -2.63127 | 1 | 1 MED28P5        | K15141 |
| ENSG00000255206 | 5.13E-15 | -2.63127 | 1 | 1 RP11-403D15.2  | -      |
| ENSG00000255207 | 5.13E-15 | -2.63127 | 1 | 1 RP1-305G21.1   | -      |
| ENSG00000255208 | 5.13E-15 | -2.63127 | 1 | 1 RP11-794P6.3   | -      |
| ENSG00000255209 | 5.13E-15 | -2.63127 | 1 | 1 RP11-258O13.1  | -      |
| ENSG00000255210 | 5.13E-15 | -2.63127 | 1 | 1 RP11-344L21.1  | K03013 |
| ENSG00000255211 | 5.13E-15 | -2.63127 | 1 | 1 RP11-1195F20.7 | K11845 |
| ENSG00000255213 | 5.13E-15 | -2.63127 | 1 | 1 NPM1P35        | K11276 |
| ENSG00000255214 | 5.13E-15 | -2.63127 | 1 | 1 RP11-163O19.10 | K12019 |
| ENSG00000255215 | 5.13E-15 | -2.63127 | 1 | 1 OR4R1P         | K04257 |
| ENSG00000255216 | 5.13E-15 | -2.63127 | 1 | 1 RP11-831A10.1  | -      |
| ENSG00000255217 | 5.13E-15 | -2.63127 | 1 | 1 OR5J7P         | K04257 |
| ENSG00000255218 | 5.13E-15 | -2.63127 | 1 | 1 OR5BC1P        | K04257 |
| ENSG00000255219 | 5.13E-15 | -2.63127 | 1 | 1 RP11-716H6.2   | -      |
| ENSG00000255220 | 5.13E-15 | -2.63127 | 1 | 1 DDX18P5        | K13179 |
| ENSG00000255221 | 5.13E-15 | -2.63127 | 1 | 1 CARD17         | K01370 |
| ENSG00000255222 | 5.13E-15 | -2.63127 | 1 | 1 SETP17         | K11290 |
| ENSG00000255223 | 5.13E-15 | -2.63127 | 1 | 1 OR5M11         | K04257 |
| ENSG00000255224 | 5.13E-15 | -2.63127 | 1 | 1 CTD-3065J16.9  | -      |
| ENSG00000255225 | 5.13E-15 | -2.63127 | 1 | 1 OR8B6P         | K04257 |
| ENSG00000255226 | 5.13E-15 | -2.63127 | 1 | 1 CTD-2210P24.3  | -      |
| ENSG00000255227 | 5.13E-15 | -2.63127 | 1 | 1 RP11-460B17.2  | -      |
| ENSG00000255229 | 5.13E-15 | -2.63127 | 1 | 1 RP11-304M2.3   | -      |
| ENSG00000255230 | 5.13E-15 | -2.63127 | 1 | 1 RP5-901A4.5    | K04257 |
| ENSG00000255231 | 5.13E-15 | -2.63127 | 1 | 1 MRPS36P4       | K17414 |
| ENSG00000255232 | 5.13E-15 | -2.63127 | 1 | 1 RP11-438N5.4   | -      |

|                 |          |          |   |                  |        |
|-----------------|----------|----------|---|------------------|--------|
| ENSG00000255233 | 5.13E-15 | -2.63127 | 1 | 1 RP11-755E23.3  | --     |
| ENSG00000255234 | 5.13E-15 | -2.63127 | 1 | 1 RP11-727A23.10 | --     |
| ENSG00000255235 | 5.13E-15 | -2.63127 | 1 | 1 RP11-313I2.8   | --     |
| ENSG00000255238 | 5.13E-15 | -2.63127 | 1 | 1 RFPL4AP1       | --     |
| ENSG00000255239 | 5.13E-15 | -2.63127 | 1 | 1 AP002954.6     | K01194 |
| ENSG00000255241 | 5.13E-15 | -2.63127 | 1 | 1 RP11-164N3.3   | --     |
| ENSG00000255243 | 5.13E-15 | -2.63127 | 1 | 1 CTD-2507G9.1   | --     |
| ENSG00000255244 | 5.13E-15 | -2.63127 | 1 | 1 RP11-583F24.8  | --     |
| ENSG00000255245 | 5.13E-15 | -2.63127 | 1 | 1 FXYD6-FXYD2    | K13363 |
| ENSG00000255246 | 5.13E-15 | -2.63127 | 1 | 1 RP11-179A16.2  | --     |
| ENSG00000255247 | 5.13E-15 | -2.63127 | 1 | 1 CTD-2523D13.1  | --     |
| ENSG00000255251 | 5.13E-15 | -2.63127 | 1 | 1 PRR23D1        | --     |
| ENSG00000255252 | 5.13E-15 | -2.63127 | 1 | 1 RP1-65P5.3     | --     |
| ENSG00000255253 | 5.13E-15 | -2.63127 | 1 | 1 RP11-303G3.9   | --     |
| ENSG00000255254 | 5.13E-15 | -2.63127 | 1 | 1 HIGD1AP5       | --     |
| ENSG00000255255 | 5.13E-15 | -2.63127 | 1 | 1 PPP1R1AP1      | --     |
| ENSG00000255256 | 5.13E-15 | -2.63127 | 1 | 1 RP5-916O11.2   | --     |
| ENSG00000255257 | 5.13E-15 | -2.63127 | 1 | 1 AC025016.1     | --     |
| ENSG00000255258 | 5.13E-15 | -2.63127 | 1 | 1 RP11-448P19.1  | --     |
| ENSG00000255259 | 5.13E-15 | -2.63127 | 1 | 1 ZNF123P        | K09228 |
| ENSG00000255260 | 5.13E-15 | -2.63127 | 1 | 1 CTD-3224I3.3   | --     |
| ENSG00000255261 | 5.13E-15 | -2.63127 | 1 | 1 OR7E4P         | K04257 |
| ENSG00000255262 | 5.13E-15 | -2.63127 | 1 | 1 TCEB2P2        | K03873 |
| ENSG00000255265 | 5.13E-15 | -2.63127 | 1 | 1 TMA16P1        | K14860 |
| ENSG00000255266 | 5.13E-15 | -2.63127 | 1 | 1 RP11-734C14.2  | K03948 |
| ENSG00000255267 | 5.13E-15 | -2.63127 | 1 | 1 RP11-430H10.2  | --     |
| ENSG00000255268 | 5.13E-15 | -2.63127 | 1 | 1 RP11-707M1.9   | K12019 |
| ENSG00000255269 | 5.13E-15 | -2.63127 | 1 | 1 RP11-702F3.4   | --     |
| ENSG00000255270 | 5.13E-15 | -2.63127 | 1 | 1 NAV2-IT1       | --     |
| ENSG00000255271 | 5.13E-15 | -2.63127 | 1 | 1 RP4-594L9.2    | --     |
| ENSG00000255273 | 5.13E-15 | -2.63127 | 1 | 1 AF238378.7     | K04257 |
| ENSG00000255274 | 5.13E-15 | -2.63127 | 1 | 1 TMPRSS4-AS1    | --     |
| ENSG00000255275 | 5.13E-15 | -2.63127 | 1 | 1 RP13-279N23.2  | K04625 |
| ENSG00000255276 | 5.13E-15 | -2.63127 | 1 | 1 RRM1-AS1       | --     |
| ENSG00000255277 | 5.13E-15 | -2.63127 | 1 | 1 ABCC6P2        | K05669 |
| ENSG00000255279 | 5.13E-15 | -2.63127 | 1 | 1 RP11-375D13.4  | --     |
| ENSG00000255280 | 5.13E-15 | -2.63127 | 1 | 1 CTD-2530H12.5  | K02922 |
| ENSG00000255281 | 5.13E-15 | -2.63127 | 1 | 1 RP11-460B17.1  | --     |
| ENSG00000255282 | 5.13E-15 | -2.63127 | 1 | 1 WTAPP1         | --     |
| ENSG00000255283 | 5.13E-15 | -2.63127 | 1 | 1 RP11-72M10.4   | --     |
| ENSG00000255285 | 5.13E-15 | -2.63127 | 1 | 1 RP11-358N4.5   | --     |
| ENSG00000255286 | 5.13E-15 | -2.63127 | 1 | 1 RP11-708L7.7   | K02915 |
| ENSG00000255287 | 5.13E-15 | -2.63127 | 1 | 1 SNRPGP16       | --     |
| ENSG00000255288 | 5.13E-15 | -2.63127 | 1 | 1 RP4-562D20.2   | --     |
| ENSG00000255289 | 5.13E-15 | -2.63127 | 1 | 1 RP11-91I20.1   | --     |
| ENSG00000255291 | 5.13E-15 | -2.63127 | 1 | 1 RP11-701I24.1  | K10802 |
| ENSG00000255292 | 5.13E-15 | -2.63127 | 1 | 1 SDHD           | K19537 |
| ENSG00000255293 | 5.13E-15 | -2.63127 | 1 | 1 RP11-787P24.1  | --     |
| ENSG00000255294 | 5.13E-15 | -2.63127 | 1 | 1 OR4A50P        | K04257 |
| ENSG00000255295 | 5.13E-15 | -2.63127 | 1 | 1 RP11-745I13.1  | K11253 |
| ENSG00000255296 | 5.13E-15 | -2.63127 | 1 | 1 RP11-757C15.4  | K02880 |
| ENSG00000255297 | 5.13E-15 | -2.63127 | 1 | 1 OR4A41P        | K04257 |
| ENSG00000255298 | 5.13E-15 | -2.63127 | 1 | 1 OR8G5          | K04257 |
| ENSG00000255299 | 5.13E-15 | -2.63127 | 1 | 1 RP11-655C2.3   | --     |
| ENSG00000255300 | 5.13E-15 | -2.63127 | 1 | 1 RP11-148I19.1  | --     |
| ENSG00000255301 | 5.13E-15 | -2.63127 | 1 | 1 RP11-624G17.3  | --     |
| ENSG00000255303 | 5.13E-15 | -2.63127 | 1 | 1 OR5BA1P        | K04257 |
| ENSG00000255304 | 5.13E-15 | -2.63127 | 1 | 1 OR4A46P        | K04257 |

|                 |          |          |   |                  |        |
|-----------------|----------|----------|---|------------------|--------|
| ENSG00000255305 | 5.13E-15 | -2.63127 | 1 | 1 RP11-529A4.7   | -      |
| ENSG00000255307 | 5.13E-15 | -2.63127 | 1 | 1 OR52B2         | K04257 |
| ENSG00000255309 | 5.13E-15 | -2.63127 | 1 | 1 RP11-756D7.1   | -      |
| ENSG00000255310 | 5.13E-15 | -2.63127 | 1 | 1 AF131215.2     | -      |
| ENSG00000255312 | 5.13E-15 | -2.63127 | 1 | 1 OR4C7P         | K04257 |
| ENSG00000255313 | 5.13E-15 | -2.63127 | 1 | 1 RP11-1082L8.2  | -      |
| ENSG00000255314 | 5.13E-15 | -2.63127 | 1 | 1 RP11-702F3.3   | -      |
| ENSG00000255315 | 5.13E-15 | -2.63127 | 1 | 1 OR8A3P         | K04257 |
| ENSG00000255316 | 5.13E-15 | -2.63127 | 1 | 1 RP11-664H7.2   | -      |
| ENSG00000255317 | 5.13E-15 | -2.63127 | 1 | 1 RP11-688I9.2   | -      |
| ENSG00000255321 | 5.13E-15 | -2.63127 | 1 | 1 RP11-91I20.4   | -      |
| ENSG00000255323 | 5.13E-15 | -2.63127 | 1 | 1 CTD-2140G10.1  | -      |
| ENSG00000255326 | 5.13E-15 | -2.63127 | 1 | 1 CTD-2530H12.4  | -      |
| ENSG00000255327 | 5.13E-15 | -2.63127 | 1 | 1 RP11-555G19.1  | -      |
| ENSG00000255329 | 5.13E-15 | -2.63127 | 1 | 1 H2AFZP4        | K11251 |
| ENSG00000255330 | 5.13E-15 | -2.63127 | 1 | 1 SOGA3          | K17985 |
| ENSG00000255331 | 5.13E-15 | -2.63127 | 1 | 1 RP11-736I10.2  | K16197 |
| ENSG00000255332 | 5.13E-15 | -2.63127 | 1 | 1 RP11-201M22.1  | -      |
| ENSG00000255333 | 5.13E-15 | -2.63127 | 1 | 1 AP000435.3     | -      |
| ENSG00000255334 | 5.13E-15 | -2.63127 | 1 | 1 RP11-708L7.6   | -      |
| ENSG00000255335 | 5.13E-15 | -2.63127 | 1 | 1 RP11-358H18.2  | -      |
| ENSG00000255336 | 5.13E-15 | -2.63127 | 1 | 1 RP11-94P11.3   | -      |
| ENSG00000255338 | 5.13E-15 | -2.63127 | 1 | 1 RP11-107P7.2   | -      |
| ENSG00000255339 | 5.13E-15 | -2.63127 | 1 | 1 NDUFB8         | K03964 |
| ENSG00000255340 | 5.13E-15 | -2.63127 | 1 | 1 RP11-484D2.5   | -      |
| ENSG00000255341 | 5.13E-15 | -2.63127 | 1 | 1 OR8Q1P         | -      |
| ENSG00000255343 | 5.13E-15 | -2.63127 | 1 | 1 RP11-299M14.2  | -      |
| ENSG00000255344 | 5.13E-15 | -2.63127 | 1 | 1 RP11-469N6.2   | -      |
| ENSG00000255345 | 5.13E-15 | -2.63127 | 1 | 1 CTD-2337I7.1   | -      |
| ENSG00000255347 | 5.13E-15 | -2.63127 | 1 | 1 RP11-40H19.1   | K17578 |
| ENSG00000255348 | 5.13E-15 | -2.63127 | 1 | 1 RP11-700F16.3  | -      |
| ENSG00000255349 | 5.13E-15 | -2.63127 | 1 | 1 OR4A7P         | K04257 |
| ENSG00000255350 | 5.13E-15 | -2.63127 | 1 | 1 RP11-370I16.3  | K02256 |
| ENSG00000255351 | 5.13E-15 | -2.63127 | 1 | 1 RP11-567I13.1  | -      |
| ENSG00000255352 | 5.13E-15 | -2.63127 | 1 | 1 PPP1R10P1      | -      |
| ENSG00000255353 | 5.13E-15 | -2.63127 | 1 | 1 RP11-382M14.1  | K01940 |
| ENSG00000255354 | 5.13E-15 | -2.63127 | 1 | 1 RP11-148O21.2  | -      |
| ENSG00000255355 | 5.13E-15 | -2.63127 | 1 | 1 AP000640.2     | -      |
| ENSG00000255356 | 5.13E-15 | -2.63127 | 1 | 1 RP11-277E18.2  | K10164 |
| ENSG00000255357 | 5.13E-15 | -2.63127 | 1 | 1 RP11-34N19.1   | -      |
| ENSG00000255358 | 5.13E-15 | -2.63127 | 1 | 1 RP11-567O18.1  | K18160 |
| ENSG00000255359 | 5.13E-15 | -2.63127 | 1 | 1 CCDC179        | -      |
| ENSG00000255360 | 5.13E-15 | -2.63127 | 1 | 1 RP11-529A4.15  | K12019 |
| ENSG00000255361 | 5.13E-15 | -2.63127 | 1 | 1 RP11-412B14.2  | -      |
| ENSG00000255363 | 5.13E-15 | -2.63127 | 1 | 1 RP11-672A2.5   | -      |
| ENSG00000255364 | 5.13E-15 | -2.63127 | 1 | 1 RP11-94A24.1   | -      |
| ENSG00000255365 | 5.13E-15 | -2.63127 | 1 | 1 RP11-776K3.1   | -      |
| ENSG00000255366 | 5.13E-15 | -2.63127 | 1 | 1 RP11-1134I14.8 | -      |
| ENSG00000255367 | 5.13E-15 | -2.63127 | 1 | 1 RP13-726E6.2   | -      |
| ENSG00000255368 | 5.13E-15 | -2.63127 | 1 | 1 RP11-54J7.2    | K01097 |
| ENSG00000255369 | 5.13E-15 | -2.63127 | 1 | 1 RP11-740D6.3   | -      |
| ENSG00000255370 | 5.13E-15 | -2.63127 | 1 | 1 CYCSP25        | K08738 |
| ENSG00000255371 | 5.13E-15 | -2.63127 | 1 | 1 OPCML-IT2      | -      |
| ENSG00000255372 | 5.13E-15 | -2.63127 | 1 | 1 CTD-3064C13.1  | -      |
| ENSG00000255374 | 5.13E-15 | -2.63127 | 1 | 1 TAS2R43        | K08474 |
| ENSG00000255376 | 5.13E-15 | -2.63127 | 1 | 1 RP11-360K13.2  | -      |
| ENSG00000255377 | 5.13E-15 | -2.63127 | 1 | 1 DUXAP5         | -      |
| ENSG00000255378 | 5.13E-15 | -2.63127 | 1 | 1 PRR23D2        | -      |

|                 |          |          |   |                 |        |
|-----------------|----------|----------|---|-----------------|--------|
| ENSG00000255379 | 5.13E-15 | -2.63127 | 1 | 1 CYCSP29       | K08738 |
| ENSG00000255380 | 5.13E-15 | -2.63127 | 1 | 1 RP11-684B20.1 | K09228 |
| ENSG00000255381 | 5.13E-15 | -2.63127 | 1 | 1 AP001258.5    | -      |
| ENSG00000255384 | 5.13E-15 | -2.63127 | 1 | 1 RP11-770J1.4  | K09186 |
| ENSG00000255385 | 5.13E-15 | -2.63127 | 1 | 1 RP11-313I2.2  | -      |
| ENSG00000255386 | 5.13E-15 | -2.63127 | 1 | 1 OR5BR1P       | K04257 |
| ENSG00000255387 | 5.13E-15 | -2.63127 | 1 | 1 RP11-23F23.3  | K05762 |
| ENSG00000255388 | 5.13E-15 | -2.63127 | 1 | 1 RP11-124G5.3  | -      |
| ENSG00000255390 | 5.13E-15 | -2.63127 | 1 | 1 RP11-732A19.5 | -      |
| ENSG00000255391 | 5.13E-15 | -2.63127 | 1 | 1 CTD-2028E8.1  | K11296 |
| ENSG00000255393 | 5.13E-15 | -2.63127 | 1 | 1 RP11-736I10.1 | -      |
| ENSG00000255394 | 5.13E-15 | -2.63127 | 1 | 1 C8orf49       | -      |
| ENSG00000255395 | 5.13E-15 | -2.63127 | 1 | 1 CTD-2562J17.2 | -      |
| ENSG00000255396 | 5.13E-15 | -2.63127 | 1 | 1 AP000857.2    | -      |
| ENSG00000255399 | 5.13E-15 | -2.63127 | 1 | 1 TBX5-AS1      | -      |
| ENSG00000255401 | 5.13E-15 | -2.63127 | 1 | 1 RP11-15D14.2  | K01412 |
| ENSG00000255402 | 5.13E-15 | -2.63127 | 1 | 1 RP11-696P8.2  | -      |
| ENSG00000255403 | 5.13E-15 | -2.63127 | 1 | 1 AP000641.1    | K04077 |
| ENSG00000255404 | 5.13E-15 | -2.63127 | 1 | 1 RP11-770G2.5  | -      |
| ENSG00000255406 | 5.13E-15 | -2.63127 | 1 | 1 RP11-713P17.5 | -      |
| ENSG00000255408 | 5.13E-15 | -2.63127 | 1 | 1 PCDHA3        | K16493 |
| ENSG00000255410 | 5.13E-15 | -2.63127 | 1 | 1 RP11-732A19.6 | -      |
| ENSG00000255411 | 5.13E-15 | -2.63127 | 1 | 1 RP11-98J9.1   | -      |
| ENSG00000255413 | 5.13E-15 | -2.63127 | 1 | 1 RP11-436P7.2  | -      |
| ENSG00000255415 | 5.13E-15 | -2.63127 | 1 | 1 RP11-684B2.5  | K04257 |
| ENSG00000255416 | 5.13E-15 | -2.63127 | 1 | 1 OR10AF1P      | K04257 |
| ENSG00000255417 | 5.13E-15 | -2.63127 | 1 | 1 RP11-370I6.4  | -      |
| ENSG00000255418 | 5.13E-15 | -2.63127 | 1 | 1 RP11-266A24.1 | -      |
| ENSG00000255422 | 5.13E-15 | -2.63127 | 1 | 1 AP002954.4    | -      |
| ENSG00000255424 | 5.13E-15 | -2.63127 | 1 | 1 RP11-589F4.2  | K08396 |
| ENSG00000255425 | 5.13E-15 | -2.63127 | 1 | 1 OR8G3P        | K04257 |
| ENSG00000255426 | 5.13E-15 | -2.63127 | 1 | 1 CTD-2210P24.2 | -      |
| ENSG00000255428 | 5.13E-15 | -2.63127 | 1 | 1 RP11-794P6.1  | -      |
| ENSG00000255429 | 5.13E-15 | -2.63127 | 1 | 1 RP11-643G5.6  | -      |
| ENSG00000255430 | 5.13E-15 | -2.63127 | 1 | 1 CASP1P1       | K01370 |
| ENSG00000255431 | 5.13E-15 | -2.63127 | 1 | 1 OR5B19P       | K04257 |
| ENSG00000255432 | 5.13E-15 | -2.63127 | 1 | 1 RP11-831H9.11 | K13142 |
| ENSG00000255433 | 5.13E-15 | -2.63127 | 1 | 1 AP000479.1    | -      |
| ENSG00000255435 | 5.13E-15 | -2.63127 | 1 | 1 RP11-770J1.3  | -      |
| ENSG00000255436 | 5.13E-15 | -2.63127 | 1 | 1 Z95704.2      | K09228 |
| ENSG00000255437 | 5.13E-15 | -2.63127 | 1 | 1 RP11-510I21.1 | -      |
| ENSG00000255438 | 5.13E-15 | -2.63127 | 1 | 1 CTD-2653D5.1  | -      |
| ENSG00000255441 | 5.13E-15 | -2.63127 | 1 | 1 CTD-2616J11.2 | -      |
| ENSG00000255442 | 5.13E-15 | -2.63127 | 1 | 1 RP11-347H15.1 | K11141 |
| ENSG00000255444 | 5.13E-15 | -2.63127 | 1 | 1 CYCSP27       | K08738 |
| ENSG00000255446 | 5.13E-15 | -2.63127 | 1 | 1 CTD-2531D15.4 | -      |
| ENSG00000255447 | 5.13E-15 | -2.63127 | 1 | 1 CTD-2210P24.6 | -      |
| ENSG00000255448 | 5.13E-15 | -2.63127 | 1 | 1 RP1-59M18.2   | -      |
| ENSG00000255450 | 5.13E-15 | -2.63127 | 1 | 1 CTD-2063L20.1 | K03231 |
| ENSG00000255451 | 5.13E-15 | -2.63127 | 1 | 1 RP11-58K22.1  | -      |
| ENSG00000255452 | 5.13E-15 | -2.63127 | 1 | 1 RP11-107P7.1  | K12019 |
| ENSG00000255454 | 5.13E-15 | -2.63127 | 1 | 1 RP11-46P12.1  | -      |
| ENSG00000255456 | 5.13E-15 | -2.63127 | 1 | 1 CTD-2517M22.9 | -      |
| ENSG00000255457 | 5.13E-15 | -2.63127 | 1 | 1 RP11-436P7.1  | K16939 |
| ENSG00000255459 | 5.13E-15 | -2.63127 | 1 | 1 RP11-52B19.10 | K02927 |
| ENSG00000255460 | 5.13E-15 | -2.63127 | 1 | 1 ZDHHC20P3     | -      |
| ENSG00000255461 | 5.13E-15 | -2.63127 | 1 | 1 OR8I1P        | K04257 |
| ENSG00000255462 | 5.13E-15 | -2.63127 | 1 | 1 RP11-483L5.1  | -      |

|                 |          |          |   |                  |        |
|-----------------|----------|----------|---|------------------|--------|
| ENSG00000255463 | 5.13E-15 | -2.63127 | 1 | 1 RP11-16F15.4   | K13499 |
| ENSG00000255464 | 5.13E-15 | -2.63127 | 1 | 1 RP11-585F1.2   | K16941 |
| ENSG00000255465 | 5.13E-15 | -2.63127 | 1 | 1 RP11-264E20.1  | -      |
| ENSG00000255466 | 5.13E-15 | -2.63127 | 1 | 1 OR5AL2P        | K04257 |
| ENSG00000255467 | 5.13E-15 | -2.63127 | 1 | 1 RP11-144G7.2   | -      |
| ENSG00000255469 | 5.13E-15 | -2.63127 | 1 | 1 RP11-725K16.2  | -      |
| ENSG00000255470 | 5.13E-15 | -2.63127 | 1 | 1 RP11-113D6.6   | -      |
| ENSG00000255472 | 5.13E-15 | -2.63127 | 1 | 1 RP11-998D10.1  | -      |
| ENSG00000255475 | 5.13E-15 | -2.63127 | 1 | 1 RP11-687M24.4  | -      |
| ENSG00000255476 | 5.13E-15 | -2.63127 | 1 | 1 RP11-1H15.2    | -      |
| ENSG00000255479 | 5.13E-15 | -2.63127 | 1 | 1 RP11-672A2.6   | -      |
| ENSG00000255480 | 5.13E-15 | -2.63127 | 1 | 1 RP4-710M3.2    | -      |
| ENSG00000255481 | 5.13E-15 | -2.63127 | 1 | 1 OR56A7P        | K04257 |
| ENSG00000255482 | 5.13E-15 | -2.63127 | 1 | 1 RP11-315O6.2   | -      |
| ENSG00000255483 | 5.13E-15 | -2.63127 | 1 | 1 AP000889.2     | -      |
| ENSG00000255484 | 5.13E-15 | -2.63127 | 1 | 1 RP11-65M17.1   | -      |
| ENSG00000255485 | 5.13E-15 | -2.63127 | 1 | 1 OR5G4P         | K04257 |
| ENSG00000255486 | 5.13E-15 | -2.63127 | 1 | 1 RP11-313I2.13  | -      |
| ENSG00000255487 | 5.13E-15 | -2.63127 | 1 | 1 RP11-513D5.5   | -      |
| ENSG00000255489 | 5.13E-15 | -2.63127 | 1 | 1 CTC-830E23.1   | K11299 |
| ENSG00000255490 | 5.13E-15 | -2.63127 | 1 | 1 EIF4A2P5       | K03257 |
| ENSG00000255491 | 5.13E-15 | -2.63127 | 1 | 1 RP11-1082L8.4  | -      |
| ENSG00000255492 | 5.13E-15 | -2.63127 | 1 | 1 CTD-2381F24.1  | K11253 |
| ENSG00000255493 | 5.13E-15 | -2.63127 | 1 | 1 RP11-131J4.12  | K04257 |
| ENSG00000255494 | 5.13E-15 | -2.63127 | 1 | 1 LINC00681      | -      |
| ENSG00000255495 | 5.13E-15 | -2.63127 | 1 | 1 FAM85A         | -      |
| ENSG00000255496 | 5.13E-15 | -2.63127 | 1 | 1 RP11-587D21.4  | -      |
| ENSG00000255497 | 5.13E-15 | -2.63127 | 1 | 1 RP11-726G23.12 | -      |
| ENSG00000255498 | 5.13E-15 | -2.63127 | 1 | 1 RP11-618K13.2  | -      |
| ENSG00000255499 | 5.13E-15 | -2.63127 | 1 | 1 RP11-738O11.12 | -      |
| ENSG00000255500 | 5.13E-15 | -2.63127 | 1 | 1 RP11-347H15.2  | K09680 |
| ENSG00000255501 | 5.13E-15 | -2.63127 | 1 | 1 CARD18         | K12806 |
| ENSG00000255502 | 5.13E-15 | -2.63127 | 1 | 1 RP11-379J13.2  | -      |
| ENSG00000255504 | 5.13E-15 | -2.63127 | 1 | 1 RP11-788M5.3   | K18085 |
| ENSG00000255505 | 5.13E-15 | -2.63127 | 1 | 1 RP11-485O14.1  | -      |
| ENSG00000255506 | 5.13E-15 | -2.63127 | 1 | 1 RP11-203F8.1   | -      |
| ENSG00000255510 | 5.13E-15 | -2.63127 | 1 | 1 OR8A2P         | K04257 |
| ENSG00000255511 | 5.13E-15 | -2.63127 | 1 | 1 RP11-1081L13.3 | K13402 |
| ENSG00000255512 | 5.13E-15 | -2.63127 | 1 | 1 AP005135.2     | -      |
| ENSG00000255513 | 5.13E-15 | -2.63127 | 1 | 1 AC005363.9     | -      |
| ENSG00000255514 | 5.13E-15 | -2.63127 | 1 | 1 OR4B2P         | K04257 |
| ENSG00000255515 | 5.13E-15 | -2.63127 | 1 | 1 RP11-178H8.3   | K19589 |
| ENSG00000255516 | 5.13E-15 | -2.63127 | 1 | 1 RP11-164N3.1   | -      |
| ENSG00000255518 | 5.13E-15 | -2.63127 | 1 | 1 RP11-148O21.4  | -      |
| ENSG00000255519 | 5.13E-15 | -2.63127 | 1 | 1 RP11-958J22.2  | K11300 |
| ENSG00000255520 | 5.13E-15 | -2.63127 | 1 | 1 RP11-390K5.3   | -      |
| ENSG00000255522 | 5.13E-15 | -2.63127 | 1 | 1 RP13-726E6.3   | K11095 |
| ENSG00000255523 | 5.13E-15 | -2.63127 | 1 | 1 RP11-780O24.2  | -      |
| ENSG00000255525 | 5.13E-15 | -2.63127 | 1 | 1 RP1-296L11.1   | -      |
| ENSG00000255527 | 5.13E-15 | -2.63127 | 1 | 1 RP11-56P9.4    | K12019 |
| ENSG00000255528 | 5.13E-15 | -2.63127 | 1 | 1 RP11-25I9.2    | -      |
| ENSG00000255530 | 5.13E-15 | -2.63127 | 1 | 1 RP5-1047A19.6  | K09228 |
| ENSG00000255531 | 5.13E-15 | -2.63127 | 1 | 1 NDUFS5P6       | -      |
| ENSG00000255532 | 5.13E-15 | -2.63127 | 1 | 1 CTD-2026G22.1  | -      |
| ENSG00000255533 | 5.13E-15 | -2.63127 | 1 | 1 RP11-326C3.4   | K17403 |
| ENSG00000255534 | 5.13E-15 | -2.63127 | 1 | 1 OR4A43P        | K04257 |
| ENSG00000255535 | 5.13E-15 | -2.63127 | 1 | 1 RP11-679I18.4  | K02866 |
| ENSG00000255536 | 5.13E-15 | -2.63127 | 1 | 1 RP11-583F24.5  | K08396 |

|                 |          |          |   |                  |        |
|-----------------|----------|----------|---|------------------|--------|
| ENSG00000255537 | 5.13E-15 | -2.63127 | 1 | 1 AP000708.1     | K17985 |
| ENSG00000255538 | 5.13E-15 | -2.63127 | 1 | 1 OR10V2P        | K04257 |
| ENSG00000255539 | 5.13E-15 | -2.63127 | 1 | 1 CTA-797E19.2   | -      |
| ENSG00000255540 | 5.13E-15 | -2.63127 | 1 | 1 RP11-313I2.5   | -      |
| ENSG00000255541 | 5.13E-15 | -2.63127 | 1 | 1 RP11-727A23.8  | K02219 |
| ENSG00000255542 | 5.13E-15 | -2.63127 | 1 | 1 RP4-683L5.1    | -      |
| ENSG00000255543 | 5.13E-15 | -2.63127 | 1 | 1 RP11-72M10.2   | K12019 |
| ENSG00000255544 | 5.13E-15 | -2.63127 | 1 | 1 DEFB108P3      | -      |
| ENSG00000255545 | 5.13E-15 | -2.63127 | 1 | 1 RP11-627G23.1  | -      |
| ENSG00000255546 | 5.13E-15 | -2.63127 | 1 | 1 RP11-168K9.1   | -      |
| ENSG00000255547 | 5.13E-15 | -2.63127 | 1 | 1 RPA2P3         | K10739 |
| ENSG00000255548 | 5.13E-15 | -2.63127 | 1 | 1 RP11-617B3.2   | -      |
| ENSG00000255549 | 5.13E-15 | -2.63127 | 1 | 1 ENPP7P6        | K12354 |
| ENSG00000255550 | 5.13E-15 | -2.63127 | 1 | 1 RP11-163O19.11 | -      |
| ENSG00000255551 | 5.13E-15 | -2.63127 | 1 | 1 RP11-56P9.5    | -      |
| ENSG00000255552 | 5.13E-15 | -2.63127 | 1 | 1 LY6G6E         | K06846 |
| ENSG00000255554 | 5.13E-15 | -2.63127 | 1 | 1 OR7E1P         | K04257 |
| ENSG00000255555 | 5.13E-15 | -2.63127 | 1 | 1 AP000857.3     | -      |
| ENSG00000255556 | 5.13E-15 | -2.63127 | 1 | 1 RP11-351I21.6  | K11845 |
| ENSG00000255558 | 5.13E-15 | -2.63127 | 1 | 1 CTC-497E21.5   | -      |
| ENSG00000255560 | 5.13E-15 | -2.63127 | 1 | 1 OR4R2P         | -      |
| ENSG00000255561 | 5.13E-15 | -2.63127 | 1 | 1 FDXACB1        | K03846 |
| ENSG00000255562 | 5.13E-15 | -2.63127 | 1 | 1 UNC93B6        | K04257 |
| ENSG00000255563 | 5.13E-15 | -2.63127 | 1 | 1 RP11-124G5.2   | K10140 |
| ENSG00000255569 | 5.13E-15 | -2.63127 | 1 | 1 TRAV1-1        | -      |
| ENSG00000255571 | 5.13E-15 | -2.63127 | 1 | 1 LINC00925      | -      |
| ENSG00000255575 | 5.13E-15 | -2.63127 | 1 | 1 RP1-267D11.1   | K16742 |
| ENSG00000255580 | 5.13E-15 | -2.63127 | 1 | 1 AP000462.2     | -      |
| ENSG00000255581 | 5.13E-15 | -2.63127 | 1 | 1 RP11-69M1.4    | K04077 |
| ENSG00000255582 | 5.13E-15 | -2.63127 | 1 | 1 OR10G2         | K04257 |
| ENSG00000255583 | 5.13E-15 | -2.63127 | 1 | 1 RP11-415I12.2  | K10185 |
| ENSG00000255585 | 5.13E-15 | -2.63127 | 1 | 1 RP11-188C12.2  | K09400 |
| ENSG00000255587 | 5.13E-15 | -2.63127 | 1 | 1 RAB44          | -      |
| ENSG00000255591 | 5.13E-15 | -2.63127 | 1 | 1 AL590762.1     | K13214 |
| ENSG00000255594 | 5.13E-15 | -2.63127 | 1 | 1 Z82188.1       | -      |
| ENSG00000255595 | 5.13E-15 | -2.63127 | 1 | 1 RP4-809F18.1   | -      |
| ENSG00000255599 | 5.13E-15 | -2.63127 | 1 | 1 AP000997.1     | -      |
| ENSG00000255605 | 5.13E-15 | -2.63127 | 1 | 1 RP11-644L4.1   | -      |
| ENSG00000255606 | 5.13E-15 | -2.63127 | 1 | 1 AP000439.2     | -      |
| ENSG00000255608 | 5.13E-15 | -2.63127 | 1 | 1 RP3-377H17.2   | -      |
| ENSG00000255618 | 5.13E-15 | -2.63127 | 1 | 1 RP11-357K6.1   | -      |
| ENSG00000255622 | 5.13E-15 | -2.63127 | 1 | 1 PCDHB17        | K16494 |
| ENSG00000255627 | 5.13E-15 | -2.63127 | 1 | 1 RP11-547L9.1   | K16339 |
| ENSG00000255628 | 5.13E-15 | -2.63127 | 1 | 1 RP11-313F23.3  | -      |
| ENSG00000255633 | 5.13E-15 | -2.63127 | 1 | 1 MTRNR2L9       | K01982 |
| ENSG00000255637 | 5.13E-15 | -2.63127 | 1 | 1 AC109992.1     | -      |
| ENSG00000255639 | 5.13E-15 | -2.63127 | 1 | 1 RP11-234B24.6  | K00710 |
| ENSG00000255642 | 5.13E-15 | -2.63127 | 1 | 1 PABPC1P4       | K13126 |
| ENSG00000255644 | 5.13E-15 | -2.63127 | 1 | 1 RP11-59N23.1   | -      |
| ENSG00000255648 | 5.13E-15 | -2.63127 | 1 | 1 RP11-361I14.2  | -      |
| ENSG00000255649 | 5.13E-15 | -2.63127 | 1 | 1 RP11-502N13.2  | -      |
| ENSG00000255652 | 5.13E-15 | -2.63127 | 1 | 1 RP11-313F23.4  | -      |
| ENSG00000255653 | 5.13E-15 | -2.63127 | 1 | 1 RP11-60C6.3    | -      |
| ENSG00000255655 | 5.13E-15 | -2.63127 | 1 | 1 RP11-256L11.3  | -      |
| ENSG00000255660 | 5.13E-15 | -2.63127 | 1 | 1 RERG-AS1       | -      |
| ENSG00000255663 | 5.13E-15 | -2.63127 | 1 | 1 RP11-212D19.4  | K13188 |
| ENSG00000255664 | 5.13E-15 | -2.63127 | 1 | 1 ARL6IP1P1      | -      |
| ENSG00000255666 | 5.13E-15 | -2.63127 | 1 | 1 RP11-867G2.6   | -      |



|                 |          |          |   |                    |        |
|-----------------|----------|----------|---|--------------------|--------|
| ENSG00000255669 | 5.13E-15 | -2.63127 | 1 | 1 RP11-885B4.2     | --     |
| ENSG00000255671 | 5.13E-15 | -2.63127 | 1 | 1 RP11-283I3.1     | --     |
| ENSG00000255672 | 5.13E-15 | -2.63127 | 1 | 1 RP11-45F15.2     | --     |
| ENSG00000255674 | 5.13E-15 | -2.63127 | 1 | 1 AC013718.1       | --     |
| ENSG00000255679 | 5.13E-15 | -2.63127 | 1 | 1 JRKL-AS1         | --     |
| ENSG00000255680 | 5.13E-15 | -2.63127 | 1 | 1 RP11-732A19.9    | --     |
| ENSG00000255681 | 5.13E-15 | -2.63127 | 1 | 1 AC084125.1       | K12581 |
| ENSG00000255686 | 5.13E-15 | -2.63127 | 1 | 1 RP11-227B21.2    | --     |
| ENSG00000255689 | 5.13E-15 | -2.63127 | 1 | 1 RP11-136I14.5    | --     |
| ENSG00000255690 | 5.13E-15 | -2.63127 | 1 | 1 AC005013.1       | --     |
| ENSG00000255692 | 5.13E-15 | -2.63127 | 1 | 1 RP1-127H14.3     | K16308 |
| ENSG00000255700 | 5.13E-15 | -2.63127 | 1 | 1 APOOP3           | --     |
| ENSG00000255701 | 5.13E-15 | -2.63127 | 1 | 1 AC090953.1       | K06115 |
| ENSG00000255703 | 5.13E-15 | -2.63127 | 1 | 1 RP11-46H11.2     | K12845 |
| ENSG00000255704 | 5.13E-15 | -2.63127 | 1 | 1 RP11-292I17.1    | --     |
| ENSG00000255713 | 5.13E-15 | -2.63127 | 1 | 1 OR4D2            | K04257 |
| ENSG00000255714 | 5.13E-15 | -2.63127 | 1 | 1 RP11-121J20.1    | --     |
| ENSG00000255723 | 5.13E-15 | -2.63127 | 1 | 1 RP11-529H2.2     | --     |
| ENSG00000255726 | 5.13E-15 | -2.63127 | 1 | 1 XXbac-BPG299F13. | --     |
| ENSG00000255727 | 5.13E-15 | -2.63127 | 1 | 1 RP11-508P1.2     | --     |
| ENSG00000255730 | 5.13E-15 | -2.63127 | 1 | 1 CTC-435M10.3     | K00166 |
| ENSG00000255733 | 5.13E-15 | -2.63127 | 1 | 1 IFNG-AS1         | --     |
| ENSG00000255734 | 5.13E-15 | -2.63127 | 1 | 1 HNRNPABP1        | K13044 |
| ENSG00000255735 | 5.13E-15 | -2.63127 | 1 | 1 AC110619.1       | --     |
| ENSG00000255740 | 5.13E-15 | -2.63127 | 1 | 1 RP11-239A17.1    | --     |
| ENSG00000255741 | 5.13E-15 | -2.63127 | 1 | 1 RP11-757G1.5     | --     |
| ENSG00000255743 | 5.13E-15 | -2.63127 | 1 | 1 AL360078.1       | --     |
| ENSG00000255745 | 5.13E-15 | -2.63127 | 1 | 1 RP11-625L16.1    | --     |
| ENSG00000255749 | 5.13E-15 | -2.63127 | 1 | 1 GNAI2P1          | K04630 |
| ENSG00000255750 | 5.13E-15 | -2.63127 | 1 | 1 RP11-283G6.5     | --     |
| ENSG00000255752 | 5.13E-15 | -2.63127 | 1 | 1 AL451105.1       | --     |
| ENSG00000255757 | 5.13E-15 | -2.63127 | 1 | 1 RP11-749H20.3    | --     |
| ENSG00000255760 | 5.13E-15 | -2.63127 | 1 | 1 RP11-428G5.5     | --     |
| ENSG00000255763 | 5.13E-15 | -2.63127 | 1 | 1 MRPS18CP4        | K02963 |
| ENSG00000255767 | 5.13E-15 | -2.63127 | 1 | 1 RP13-512J5.1     | K03469 |
| ENSG00000255772 | 5.13E-15 | -2.63127 | 1 | 1 GS1-410F4.4      | --     |
| ENSG00000255775 | 5.13E-15 | -2.63127 | 1 | 1 RP3-454B23.1     | --     |
| ENSG00000255778 | 5.13E-15 | -2.63127 | 1 | 1 RP4-765H13.1     | --     |
| ENSG00000255780 | 5.13E-15 | -2.63127 | 1 | 1 RP11-1029F8.1    | --     |
| ENSG00000255782 | 5.13E-15 | -2.63127 | 1 | 1 Z83840.1         | --     |
| ENSG00000255786 | 5.13E-15 | -2.63127 | 1 | 1 RP11-809N8.6     | --     |
| ENSG00000255790 | 5.13E-15 | -2.63127 | 1 | 1 RP11-711K1.7     | --     |
| ENSG00000255794 | 5.13E-15 | -2.63127 | 1 | 1 RMST             | --     |
| ENSG00000255798 | 5.13E-15 | -2.63127 | 1 | 1 RP11-817J15.3    | --     |
| ENSG00000255800 | 5.13E-15 | -2.63127 | 1 | 1 OR13C5           | K04257 |
| ENSG00000255801 | 5.13E-15 | -2.63127 | 1 | 1 RP11-561P12.5    | --     |
| ENSG00000255804 | 5.13E-15 | -2.63127 | 1 | 1 OR6J1            | K04257 |
| ENSG00000255807 | 5.13E-15 | -2.63127 | 1 | 1 PTP4A1P2         | K18041 |
| ENSG00000255811 | 5.13E-15 | -2.63127 | 1 | 1 RP1-34M23.5      | --     |
| ENSG00000255813 | 5.13E-15 | -2.63127 | 1 | 1 AL162497.1       | --     |
| ENSG00000255814 | 5.13E-15 | -2.63127 | 1 | 1 RP11-357K6.2     | --     |
| ENSG00000255815 | 5.13E-15 | -2.63127 | 1 | 1 KRT8P11          | K07605 |
| ENSG00000255824 | 5.13E-15 | -2.63127 | 1 | 1 AL590369.1       | K02927 |
| ENSG00000255825 | 5.13E-15 | -2.63127 | 1 | 1 RP5-1154L15.1    | --     |
| ENSG00000255830 | 5.13E-15 | -2.63127 | 1 | 1 RP11-385N17.3    | K10435 |
| ENSG00000255831 | 5.13E-15 | -2.63127 | 1 | 1 AL139385.1       | --     |
| ENSG00000255833 | 5.13E-15 | -2.63127 | 1 | 1 TIFAB            | --     |
| ENSG00000255835 | 5.13E-15 | -2.63127 | 1 | 1 RP4-559A3.7      | K04668 |

|                 |          |          |   |                    |        |
|-----------------|----------|----------|---|--------------------|--------|
| ENSG00000255837 | 5.13E-15 | -2.63127 | 1 | 1 TAS2R20          | K08474 |
| ENSG00000255838 | 5.13E-15 | -2.63127 | 1 | 1 RP11-753B7.2     | K00944 |
| ENSG00000255840 | 5.13E-15 | -2.63127 | 1 | 1 AC022555.1       | -      |
| ENSG00000255845 | 5.13E-15 | -2.63127 | 1 | 1 RP11-804A23.1    | -      |
| ENSG00000255850 | 5.13E-15 | -2.63127 | 1 | 1 TMEM5-AS1        | -      |
| ENSG00000255851 | 5.13E-15 | -2.63127 | 1 | 1 AC061975.9       | K09254 |
| ENSG00000255853 | 5.13E-15 | -2.63127 | 1 | 1 RP11-407A16.1    | K10841 |
| ENSG00000255854 | 5.13E-15 | -2.63127 | 1 | 1 PPIAL4B          | K12738 |
| ENSG00000255855 | 5.13E-15 | -2.63127 | 1 | 1 RP11-735A19.2    | K06709 |
| ENSG00000255856 | 5.13E-15 | -2.63127 | 1 | 1 RP11-87C12.5     | -      |
| ENSG00000255858 | 5.13E-15 | -2.63127 | 1 | 1 RP11-612B6.1     | -      |
| ENSG00000255863 | 5.13E-15 | -2.63127 | 1 | 1 AC073610.5       | K09576 |
| ENSG00000255864 | 5.13E-15 | -2.63127 | 1 | 1 RP11-444D3.1     | -      |
| ENSG00000255866 | 5.13E-15 | -2.63127 | 1 | 1 RP11-221N13.2    | -      |
| ENSG00000255870 | 5.13E-15 | -2.63127 | 1 | 1 RP11-667M19.5    | K11247 |
| ENSG00000255872 | 5.13E-15 | -2.63127 | 1 | 1 RP11-613M10.9    | K03681 |
| ENSG00000255875 | 5.13E-15 | -2.63127 | 1 | 1 CTD-2102P23.1    | K14396 |
| ENSG00000255882 | 5.13E-15 | -2.63127 | 1 | 1 RP11-290C10.1    | -      |
| ENSG00000255885 | 5.13E-15 | -2.63127 | 1 | 1 RP11-815D16.1    | K12755 |
| ENSG00000255886 | 5.13E-15 | -2.63127 | 1 | 1 RP11-196H14.2    | -      |
| ENSG00000255892 | 5.13E-15 | -2.63127 | 1 | 1 RP11-459D22.2    | -      |
| ENSG00000255899 | 5.13E-15 | -2.63127 | 1 | 1 XXbac-BPG299F13. | -      |
| ENSG00000255900 | 5.13E-15 | -2.63127 | 1 | 1 RP11-407A16.8    | -      |
| ENSG00000255902 | 5.13E-15 | -2.63127 | 1 | 1 AP001062.1       | -      |
| ENSG00000255903 | 5.13E-15 | -2.63127 | 1 | 1 RP11-136I14.4    | K02870 |
| ENSG00000255905 | 5.13E-15 | -2.63127 | 1 | 1 AL391319.1       | -      |
| ENSG00000255909 | 5.13E-15 | -2.63127 | 1 | 1 RP11-841C19.3    | K06875 |
| ENSG00000255915 | 5.13E-15 | -2.63127 | 1 | 1 AC113134.1       | -      |
| ENSG00000255916 | 5.13E-15 | -2.63127 | 1 | 1 RP13-895J2.7     | -      |
| ENSG00000255919 | 5.13E-15 | -2.63127 | 1 | 1 AC226150.3       | K05073 |
| ENSG00000255920 | 5.13E-15 | -2.63127 | 1 | 1 CCND2-AS2        | -      |
| ENSG00000255921 | 5.13E-15 | -2.63127 | 1 | 1 RP11-662I13.2    | -      |
| ENSG00000255923 | 5.13E-15 | -2.63127 | 1 | 1 RP11-983C2.1     | K17599 |
| ENSG00000255927 | 5.13E-15 | -2.63127 | 1 | 1 AC005000.1       | K12160 |
| ENSG00000255928 | 5.13E-15 | -2.63127 | 1 | 1 RP11-456I15.2    | -      |
| ENSG00000255929 | 5.13E-15 | -2.63127 | 1 | 1 RP11-867G2.8     | -      |
| ENSG00000255931 | 5.13E-15 | -2.63127 | 1 | 1 RP11-286N22.10   | -      |
| ENSG00000255940 | 5.13E-15 | -2.63127 | 1 | 1 REXO1L10P        | K14570 |
| ENSG00000255944 | 5.13E-15 | -2.63127 | 1 | 1 RP11-407A16.4    | -      |
| ENSG00000255945 | 5.13E-15 | -2.63127 | 1 | 1 RP11-351O2.1     | -      |
| ENSG00000255946 | 5.13E-15 | -2.63127 | 1 | 1 RP11-173P15.7    | -      |
| ENSG00000255947 | 5.13E-15 | -2.63127 | 1 | 1 RP11-855O10.3    | -      |
| ENSG00000255949 | 5.13E-15 | -2.63127 | 1 | 1 AP003419.16      | -      |
| ENSG00000255951 | 5.13E-15 | -2.63127 | 1 | 1 RP11-967K21.2    | K04638 |
| ENSG00000255958 | 5.13E-15 | -2.63127 | 1 | 1 RP11-656E20.5    | -      |
| ENSG00000255959 | 5.13E-15 | -2.63127 | 1 | 1 RP11-804A23.2    | -      |
| ENSG00000255960 | 5.13E-15 | -2.63127 | 1 | 1 RP11-459D22.1    | K10290 |
| ENSG00000255963 | 5.13E-15 | -2.63127 | 1 | 1 PPIAL4A          | K12738 |
| ENSG00000255964 | 5.13E-15 | -2.63127 | 1 | 1 RP11-69M1.3      | K04077 |
| ENSG00000255965 | 5.13E-15 | -2.63127 | 1 | 1 RP11-408I18.9    | -      |
| ENSG00000255972 | 5.13E-15 | -2.63127 | 1 | 1 RP11-324E6.8     | K11577 |
| ENSG00000255973 | 5.13E-15 | -2.63127 | 1 | 1 RP11-592H6.3     | K10419 |
| ENSG00000255976 | 5.13E-15 | -2.63127 | 1 | 1 RAB11AP2         | -      |
| ENSG00000255977 | 5.13E-15 | -2.63127 | 1 | 1 RP11-444J21.2    | K04644 |
| ENSG00000255980 | 5.13E-15 | -2.63127 | 1 | 1 AP000439.1       | -      |
| ENSG00000255982 | 5.13E-15 | -2.63127 | 1 | 1 NXPE2P1          | -      |
| ENSG00000255983 | 5.13E-15 | -2.63127 | 1 | 1 RP11-1038A11.1   | -      |
| ENSG00000255986 | 5.13E-15 | -2.63127 | 1 | 1 MT1JP            | K14739 |

|                 |          |          |   |                  |        |
|-----------------|----------|----------|---|------------------|--------|
| ENSG00000255987 | 5.13E-15 | -2.63127 | 1 | 1 RP11-1094M14.4 | K17770 |
| ENSG00000255988 | 5.13E-15 | -2.63127 | 1 | 1 TUBB4BP1       | -      |
| ENSG00000255990 | 5.13E-15 | -2.63127 | 1 | 1 AC034102.1     | -      |
| ENSG00000255991 | 5.13E-15 | -2.63127 | 1 | 1 RP11-242C24.2  | K02936 |
| ENSG00000255993 | 5.13E-15 | -2.63127 | 1 | 1 PSMC1P9        | K03062 |
| ENSG00000255995 | 5.13E-15 | -2.63127 | 1 | 1 HPRTP4         | -      |
| ENSG00000255996 | 5.13E-15 | -2.63127 | 1 | 1 RP11-429A20.2  | K03249 |
| ENSG00000255998 | 5.13E-15 | -2.63127 | 1 | 1 RP11-407A16.7  | -      |
| ENSG00000256004 | 5.13E-15 | -2.63127 | 1 | 1 RP11-20D14.4   | K10898 |
| ENSG00000256005 | 5.13E-15 | -2.63127 | 1 | 1 AC093734.1     | -      |
| ENSG00000256007 | 5.13E-15 | -2.63127 | 1 | 1 ARAP1-AS1      | -      |
| ENSG00000256013 | 5.13E-15 | -2.63127 | 1 | 1 RP11-27M24.1   | -      |
| ENSG00000256014 | 5.13E-15 | -2.63127 | 1 | 1 AL031390.1     | -      |
| ENSG00000256019 | 5.13E-15 | -2.63127 | 1 | 1 TAS2R63P       | K08474 |
| ENSG00000256020 | 5.13E-15 | -2.63127 | 1 | 1 RP5-1154L15.2  | -      |
| ENSG00000256021 | 5.13E-15 | -2.63127 | 1 | 1 TCEB1P31       | K03872 |
| ENSG00000256022 | 5.13E-15 | -2.63127 | 1 | 1 RP11-526P6.1   | -      |
| ENSG00000256025 | 5.13E-15 | -2.63127 | 1 | 1 CACNA1C-AS4    | -      |
| ENSG00000256029 | 5.13E-15 | -2.63127 | 1 | 1 RP11-190A12.7  | -      |
| ENSG00000256031 | 5.13E-15 | -2.63127 | 1 | 1 RP11-364C11.3  | -      |
| ENSG00000256034 | 5.13E-15 | -2.63127 | 1 | 1 RP11-707G14.1  | -      |
| ENSG00000256035 | 5.13E-15 | -2.63127 | 1 | 1 AP000619.6     | K08957 |
| ENSG00000256040 | 5.13E-15 | -2.63127 | 1 | 1 PAPPAS-AS1     | -      |
| ENSG00000256041 | 5.13E-15 | -2.63127 | 1 | 1 RP11-959F10.4  | K06635 |
| ENSG00000256043 | 5.13E-15 | -2.63127 | 1 | 1 CTSO           | K01374 |
| ENSG00000256044 | 5.13E-15 | -2.63127 | 1 | 1 RP11-324E6.4   | -      |
| ENSG00000256045 | 5.13E-15 | -2.63127 | 1 | 1 MTRNR2L10      | K01982 |
| ENSG00000256049 | 5.13E-15 | -2.63127 | 1 | 1 PADI6          | -      |
| ENSG00000256056 | 5.13E-15 | -2.63127 | 1 | 1 RP11-709A23.2  | -      |
| ENSG00000256064 | 5.13E-15 | -2.63127 | 1 | 1 RP11-117L5.4   | -      |
| ENSG00000256066 | 5.13E-15 | -2.63127 | 1 | 1 AC013269.1     | K17299 |
| ENSG00000256070 | 5.13E-15 | -2.63127 | 1 | 1 RP11-56H16.1   | K09560 |
| ENSG00000256071 | 5.13E-15 | -2.63127 | 1 | 1 RP11-465L8.1   | -      |
| ENSG00000256072 | 5.13E-15 | -2.63127 | 1 | 1 RP11-335I12.2  | -      |
| ENSG00000256075 | 5.13E-15 | -2.63127 | 1 | 1 RP11-81H14.3   | K03064 |
| ENSG00000256077 | 5.13E-15 | -2.63127 | 1 | 1 RP11-335O4.1   | -      |
| ENSG00000256079 | 5.13E-15 | -2.63127 | 1 | 1 RP11-318G8.2   | -      |
| ENSG00000256081 | 5.13E-15 | -2.63127 | 1 | 1 AE000658.25    | K18584 |
| ENSG00000256083 | 5.13E-15 | -2.63127 | 1 | 1 RP11-366L20.3  | -      |
| ENSG00000256084 | 5.13E-15 | -2.63127 | 1 | 1 RP11-134N1.2   | -      |
| ENSG00000256085 | 5.13E-15 | -2.63127 | 1 | 1 RP11-337L12.1  | -      |
| ENSG00000256091 | 5.13E-15 | -2.63127 | 1 | 1 RP11-627G1.1   | K02835 |
| ENSG00000256093 | 5.13E-15 | -2.63127 | 1 | 1 RP11-158L12.2  | K17772 |
| ENSG00000256098 | 5.13E-15 | -2.63127 | 1 | 1 RP11-691F15.1  | -      |
| ENSG00000256100 | 5.13E-15 | -2.63127 | 1 | 1 AP000721.4     | K02273 |
| ENSG00000256101 | 5.13E-15 | -2.63127 | 1 | 1 RP11-90D4.3    | -      |
| ENSG00000256103 | 5.13E-15 | -2.63127 | 1 | 1 RP1-96H9.5     | K02130 |
| ENSG00000256108 | 5.13E-15 | -2.63127 | 1 | 1 RP13-672B3.5   | -      |
| ENSG00000256115 | 5.13E-15 | -2.63127 | 1 | 1 RP11-319E16.1  | -      |
| ENSG00000256120 | 5.13E-15 | -2.63127 | 1 | 1 RP11-778H2.1   | -      |
| ENSG00000256121 | 5.13E-15 | -2.63127 | 1 | 1 AC010296.1     | -      |
| ENSG00000256122 | 5.13E-15 | -2.63127 | 1 | 1 AC093334.1     | -      |
| ENSG00000256124 | 5.13E-15 | -2.63127 | 1 | 1 LINC01152      | -      |
| ENSG00000256125 | 5.13E-15 | -2.63127 | 1 | 1 RP5-944M2.4    | K13120 |
| ENSG00000256128 | 5.13E-15 | -2.63127 | 1 | 1 LINC00944      | -      |
| ENSG00000256134 | 5.13E-15 | -2.63127 | 1 | 1 RP11-674J14.3  | K09592 |
| ENSG00000256136 | 5.13E-15 | -2.63127 | 1 | 1 RP11-113C12.8  | K04257 |
| ENSG00000256137 | 5.13E-15 | -2.63127 | 1 | 1 RP11-174M13.2  | -      |

|                 |          |          |   |                    |        |
|-----------------|----------|----------|---|--------------------|--------|
| ENSG00000256138 | 5.13E-15 | -2.63127 | 1 | 1 RP11-127B1.1     | K09229 |
| ENSG00000256142 | 5.13E-15 | -2.63127 | 1 | 1 AL513327.1       | -      |
| ENSG00000256143 | 5.13E-15 | -2.63127 | 1 | 1 Z95704.5         | K02927 |
| ENSG00000256146 | 5.13E-15 | -2.63127 | 1 | 1 RP11-319E16.2    | -      |
| ENSG00000256148 | 5.13E-15 | -2.63127 | 1 | 1 RP11-809N8.5     | K02256 |
| ENSG00000256149 | 5.13E-15 | -2.63127 | 1 | 1 RP11-357K6.3     | -      |
| ENSG00000256150 | 5.13E-15 | -2.63127 | 1 | 1 RP11-885B4.1     | -      |
| ENSG00000256151 | 5.13E-15 | -2.63127 | 1 | 1 RP11-76C10.5     | -      |
| ENSG00000256152 | 5.13E-15 | -2.63127 | 1 | 1 RP11-463O12.3    | -      |
| ENSG00000256157 | 5.13E-15 | -2.63127 | 1 | 1 RP11-80N2.2      | K11887 |
| ENSG00000256162 | 5.13E-15 | -2.63127 | 1 | 1 SMLR1            | -      |
| ENSG00000256164 | 5.13E-15 | -2.63127 | 1 | 1 CCND2-AS1        | -      |
| ENSG00000256166 | 5.13E-15 | -2.63127 | 1 | 1 XXbac-BPG248L24. | -      |
| ENSG00000256167 | 5.13E-15 | -2.63127 | 1 | 1 ATF4P4           | K04374 |
| ENSG00000256171 | 5.13E-15 | -2.63127 | 1 | 1 GCSHP4           | K02437 |
| ENSG00000256172 | 5.13E-15 | -2.63127 | 1 | 1 RP11-473M14.3    | -      |
| ENSG00000256178 | 5.13E-15 | -2.63127 | 1 | 1 AC004889.1       | -      |
| ENSG00000256181 | 5.13E-15 | -2.63127 | 1 | 1 AP000438.4       | K08206 |
| ENSG00000256182 | 5.13E-15 | -2.63127 | 1 | 1 AL590325.1       | -      |
| ENSG00000256186 | 5.13E-15 | -2.63127 | 1 | 1 AL732372.1       | K14404 |
| ENSG00000256188 | 5.13E-15 | -2.63127 | 1 | 1 TAS2R30          | K08474 |
| ENSG00000256189 | 5.13E-15 | -2.63127 | 1 | 1 RP11-167N4.5     | -      |
| ENSG00000256192 | 5.13E-15 | -2.63127 | 1 | 1 RP11-290I21.2    | -      |
| ENSG00000256193 | 5.13E-15 | -2.63127 | 1 | 1 LINC00507        | -      |
| ENSG00000256197 | 5.13E-15 | -2.63127 | 1 | 1 TSPAN9-IT1       | -      |
| ENSG00000256199 | 5.13E-15 | -2.63127 | 1 | 1 RP11-439H13.2    | -      |
| ENSG00000256204 | 5.13E-15 | -2.63127 | 1 | 1 RP11-243M5.1     | -      |
| ENSG00000256206 | 5.13E-15 | -2.63127 | 1 | 1 PSMA1            | K02725 |
| ENSG00000256209 | 5.13E-15 | -2.63127 | 1 | 1 RP11-897M7.1     | -      |
| ENSG00000256211 | 5.13E-15 | -2.63127 | 1 | 1 RP11-1018J11.1   | K03094 |
| ENSG00000256212 | 5.13E-15 | -2.63127 | 1 | 1 AL773602.1       | -      |
| ENSG00000256218 | 5.13E-15 | -2.63127 | 1 | 1 RP11-1038A11.2   | -      |
| ENSG00000256220 | 5.13E-15 | -2.63127 | 1 | 1 CTD-2331C18.5    | -      |
| ENSG00000256221 | 5.13E-15 | -2.63127 | 1 | 1 AE000661.36      | -      |
| ENSG00000256222 | 5.13E-15 | -2.63127 | 1 | 1 MTRNR2L3         | K01982 |
| ENSG00000256225 | 5.13E-15 | -2.63127 | 1 | 1 AL590710.1       | -      |
| ENSG00000256226 | 5.13E-15 | -2.63127 | 1 | 1 RP11-582E3.2     | -      |
| ENSG00000256229 | 5.13E-15 | -2.63127 | 1 | 1 ZNF486           | K09228 |
| ENSG00000256232 | 5.13E-15 | -2.63127 | 1 | 1 RP11-771K4.1     | -      |
| ENSG00000256235 | 5.13E-15 | -2.63127 | 1 | 1 SMIM3            | -      |
| ENSG00000256237 | 5.13E-15 | -2.63127 | 1 | 1 RP11-434C1.2     | -      |
| ENSG00000256239 | 5.13E-15 | -2.63127 | 1 | 1 AL589642.1       | K03125 |
| ENSG00000256240 | 5.13E-15 | -2.63127 | 1 | 1 AC010620.1       | K09228 |
| ENSG00000256248 | 5.13E-15 | -2.63127 | 1 | 1 RP11-123O10.4    | -      |
| ENSG00000256249 | 5.13E-15 | -2.63127 | 1 | 1 RP11-324E6.6     | -      |
| ENSG00000256254 | 5.13E-15 | -2.63127 | 1 | 1 AP000647.3       | K17592 |
| ENSG00000256256 | 5.13E-15 | -2.63127 | 1 | 1 RP11-443N24.4    | -      |
| ENSG00000256257 | 5.13E-15 | -2.63127 | 1 | 1 CACNA1C-IT2      | -      |
| ENSG00000256258 | 5.13E-15 | -2.63127 | 1 | 1 RP11-495K9.9     | -      |
| ENSG00000256259 | 5.13E-15 | -2.63127 | 1 | 1 RP11-366L20.4    | -      |
| ENSG00000256261 | 5.13E-15 | -2.63127 | 1 | 1 AC104698.1       | -      |
| ENSG00000256262 | 5.13E-15 | -2.63127 | 1 | 1 USP30-AS1        | -      |
| ENSG00000256271 | 5.13E-15 | -2.63127 | 1 | 1 CACNA1C-AS2      | -      |
| ENSG00000256273 | 5.13E-15 | -2.63127 | 1 | 1 RP11-71J4.2      | -      |
| ENSG00000256274 | 5.13E-15 | -2.63127 | 1 | 1 TAS2R64P         | K08474 |
| ENSG00000256276 | 5.13E-15 | -2.63127 | 1 | 1 RP5-916L7.2      | -      |
| ENSG00000256280 | 5.13E-15 | -2.63127 | 1 | 1 RP11-466C23.5    | K02140 |
| ENSG00000256281 | 5.13E-15 | -2.63127 | 1 | 1 RP11-136I14.2    | -      |

|                 |          |          |   |                  |        |
|-----------------|----------|----------|---|------------------|--------|
| ENSG00000256283 | 5.13E-15 | -2.63127 | 1 | 1 RP11-365O10.1  | --     |
| ENSG00000256285 | 5.13E-15 | -2.63127 | 1 | 1 OSBPL9P5       | --     |
| ENSG00000256286 | 5.13E-15 | -2.63127 | 1 | 1 RP11-983C2.3   | --     |
| ENSG00000256292 | 5.13E-15 | -2.63127 | 1 | 1 RP11-955H22.1  | --     |
| ENSG00000256295 | 5.13E-15 | -2.63127 | 1 | 1 AC005086.2     | K02159 |
| ENSG00000256298 | 5.13E-15 | -2.63127 | 1 | 1 RP11-474D1.1   | --     |
| ENSG00000256301 | 5.13E-15 | -2.63127 | 1 | 1 AC138031.2     | K14404 |
| ENSG00000256305 | 5.13E-15 | -2.63127 | 1 | 1 AL359757.1     | --     |
| ENSG00000256306 | 5.13E-15 | -2.63127 | 1 | 1 RP11-4N23.1    | --     |
| ENSG00000256309 | 5.13E-15 | -2.63127 | 1 | 1 AC009469.1     | --     |
| ENSG00000256310 | 5.13E-15 | -2.63127 | 1 | 1 NDUFA5P6       | K03949 |
| ENSG00000256311 | 5.13E-15 | -2.63127 | 1 | 1 RP11-64B16.5   | --     |
| ENSG00000256312 | 5.13E-15 | -2.63127 | 1 | 1 RP13-977J11.8  | --     |
| ENSG00000256314 | 5.13E-15 | -2.63127 | 1 | 1 RP11-338E21.3  | --     |
| ENSG00000256315 | 5.13E-15 | -2.63127 | 1 | 1 AP000462.1     | --     |
| ENSG00000256321 | 5.13E-15 | -2.63127 | 1 | 1 RP11-153K16.1  | --     |
| ENSG00000256323 | 5.13E-15 | -2.63127 | 1 | 1 AL049542.1     | --     |
| ENSG00000256331 | 5.13E-15 | -2.63127 | 1 | 1 NIFKP3         | K14838 |
| ENSG00000256338 | 5.13E-15 | -2.63127 | 1 | 1 RPL41P2        | K02928 |
| ENSG00000256339 | 5.13E-15 | -2.63127 | 1 | 1 RP11-233G1.4   | --     |
| ENSG00000256340 | 5.13E-15 | -2.63127 | 1 | 1 ABCC6P1        | K05669 |
| ENSG00000256341 | 5.13E-15 | -2.63127 | 1 | 1 RP11-21A7A.3   | --     |
| ENSG00000256342 | 5.13E-15 | -2.63127 | 1 | 1 RP3-446N13.1   | --     |
| ENSG00000256343 | 5.13E-15 | -2.63127 | 1 | 1 RP11-662M24.1  | --     |
| ENSG00000256346 | 5.13E-15 | -2.63127 | 1 | 1 RP11-72J9.1    | --     |
| ENSG00000256347 | 5.13E-15 | -2.63127 | 1 | 1 OR8R1P         | --     |
| ENSG00000256349 | 5.13E-15 | -2.63127 | 1 | 1 CTD-3074O7.11  | K16746 |
| ENSG00000256350 | 5.13E-15 | -2.63127 | 1 | 1 AE000658.30    | K19327 |
| ENSG00000256352 | 5.13E-15 | -2.63127 | 1 | 1 AL109922.2     | --     |
| ENSG00000256353 | 5.13E-15 | -2.63127 | 1 | 1 RP11-686N4.1   | --     |
| ENSG00000256354 | 5.13E-15 | -2.63127 | 1 | 1 AC104304.1     | --     |
| ENSG00000256355 | 5.13E-15 | -2.63127 | 1 | 1 NTAN1P3        | --     |
| ENSG00000256357 | 5.13E-15 | -2.63127 | 1 | 1 RP11-349I1.2   | --     |
| ENSG00000256358 | 5.13E-15 | -2.63127 | 1 | 1 RPL31P57       | K02910 |
| ENSG00000256362 | 5.13E-15 | -2.63127 | 1 | 1 RP11-955H22.3  | --     |
| ENSG00000256364 | 5.13E-15 | -2.63127 | 1 | 1 RP11-173P15.3  | --     |
| ENSG00000256371 | 5.13E-15 | -2.63127 | 1 | 1 RP11-359J14.3  | --     |
| ENSG00000256372 | 5.13E-15 | -2.63127 | 1 | 1 RP11-428G5.4   | --     |
| ENSG00000256373 | 5.13E-15 | -2.63127 | 1 | 1 RP11-711K1.8   | --     |
| ENSG00000256374 | 5.13E-15 | -2.63127 | 1 | 1 PPIAL4D        | K12738 |
| ENSG00000256378 | 5.13E-15 | -2.63127 | 1 | 1 RP11-993B23.1  | --     |
| ENSG00000256379 | 5.13E-15 | -2.63127 | 1 | 1 TRAV8-5        | --     |
| ENSG00000256385 | 5.13E-15 | -2.63127 | 1 | 1 AE000658.27    | K10580 |
| ENSG00000256386 | 5.13E-15 | -2.63127 | 1 | 1 AP000244.1     | --     |
| ENSG00000256389 | 5.13E-15 | -2.63127 | 1 | 1 RP11-606D9.1   | --     |
| ENSG00000256390 | 5.13E-15 | -2.63127 | 1 | 1 AC092143.1     | K04199 |
| ENSG00000256394 | 5.13E-15 | -2.63127 | 1 | 1 ASIC5          | K04832 |
| ENSG00000256399 | 5.13E-15 | -2.63127 | 1 | 1 RP11-274J7.3   | --     |
| ENSG00000256400 | 5.13E-15 | -2.63127 | 1 | 1 RP11-673D15.7  | --     |
| ENSG00000256403 | 5.13E-15 | -2.63127 | 1 | 1 RP11-7N14.1    | --     |
| ENSG00000256404 | 5.13E-15 | -2.63127 | 1 | 1 AC109133.1     | --     |
| ENSG00000256417 | 5.13E-15 | -2.63127 | 1 | 1 RP11-1038A11.3 | --     |
| ENSG00000256420 | 5.13E-15 | -2.63127 | 1 | 1 OSBPL9P4       | --     |
| ENSG00000256422 | 5.13E-15 | -2.63127 | 1 | 1 RP11-886D15.1  | --     |
| ENSG00000256424 | 5.13E-15 | -2.63127 | 1 | 1 RP11-495K9.7   | --     |
| ENSG00000256425 | 5.13E-15 | -2.63127 | 1 | 1 AC092989.1     | --     |
| ENSG00000256436 | 5.13E-15 | -2.63127 | 1 | 1 TAS2R31        | K08474 |
| ENSG00000256439 | 5.13E-15 | -2.63127 | 1 | 1 AC008731.1     | --     |

|                 |          |          |   |                  |        |
|-----------------|----------|----------|---|------------------|--------|
| ENSG00000256440 | 5.13E-15 | -2.63127 | 1 | 1 RP11-443N24.3  | —      |
| ENSG00000256441 | 5.13E-15 | -2.63127 | 1 | 1 RP11-300I6.5   | K09512 |
| ENSG00000256442 | 5.13E-15 | -2.63127 | 1 | 1 RP11-705C15.4  | —      |
| ENSG00000256450 | 5.13E-15 | -2.63127 | 1 | 1 RP11-424M22.1  | K14455 |
| ENSG00000256452 | 5.13E-15 | -2.63127 | 1 | 1 RP11-667M19.10 | —      |
| ENSG00000256453 | 5.13E-15 | -2.63127 | 1 | 1 DND1           | —      |
| ENSG00000256458 | 5.13E-15 | -2.63127 | 1 | 1 RP11-363J17.1  | —      |
| ENSG00000256462 | 5.13E-15 | -2.63127 | 1 | 1 RP11-116G8.5   | —      |
| ENSG00000256463 | 5.13E-15 | -2.63127 | 1 | 1 SALL3          | K09219 |
| ENSG00000256464 | 5.13E-15 | -2.63127 | 1 | 1 RP11-613F22.5  | K16197 |
| ENSG00000256465 | 5.13E-15 | -2.63127 | 1 | 1 RP11-428G5.6   | —      |
| ENSG00000256466 | 5.13E-15 | -2.63127 | 1 | 1 AP003026.1     | —      |
| ENSG00000256469 | 5.13E-15 | -2.63127 | 1 | 1 RP11-856F16.2  | —      |
| ENSG00000256473 | 5.13E-15 | -2.63127 | 1 | 1 RP11-437F6.1   | —      |
| ENSG00000256474 | 5.13E-15 | -2.63127 | 1 | 1 TRAV11         | —      |
| ENSG00000256480 | 5.13E-15 | -2.63127 | 1 | 1 RP11-185H22.1  | K01896 |
| ENSG00000256482 | 5.13E-15 | -2.63127 | 1 | 1 RP11-625L16.3  | —      |
| ENSG00000256484 | 5.13E-15 | -2.63127 | 1 | 1 RP13-507P19.1  | —      |
| ENSG00000256492 | 5.13E-15 | -2.63127 | 1 | 1 AL118508.1     | —      |
| ENSG00000256494 | 5.13E-15 | -2.63127 | 1 | 1 RP5-944M2.1    | —      |
| ENSG00000256496 | 5.13E-15 | -2.63127 | 1 | 1 RP11-955H22.4  | K17599 |
| ENSG00000256498 | 5.13E-15 | -2.63127 | 1 | 1 AL928654.1     | —      |
| ENSG00000256500 | 5.13E-15 | -2.63127 | 1 | 1 RP11-73M18.2   | K10407 |
| ENSG00000256502 | 5.13E-15 | -2.63127 | 1 | 1 RP11-955H22.2  | K17599 |
| ENSG00000256504 | 5.13E-15 | -2.63127 | 1 | 1 RP11-1060J15.7 | —      |
| ENSG00000256508 | 5.13E-15 | -2.63127 | 1 | 1 RP11-554A11.6  | —      |
| ENSG00000256512 | 5.13E-15 | -2.63127 | 1 | 1 RP11-860B13.3  | —      |
| ENSG00000256513 | 5.13E-15 | -2.63127 | 1 | 1 RP11-977P2.1   | —      |
| ENSG00000256514 | 5.13E-15 | -2.63127 | 1 | 1 AP003419.11    | —      |
| ENSG00000256515 | 5.13E-15 | -2.63127 | 1 | 1 CCL3L3         | K05408 |
| ENSG00000256518 | 5.13E-15 | -2.63127 | 1 | 1 RP11-807H22.5  | K13649 |
| ENSG00000256527 | 5.13E-15 | -2.63127 | 1 | 1 AP002833.1     | —      |
| ENSG00000256528 | 5.13E-15 | -2.63127 | 1 | 1 AP006285.1     | —      |
| ENSG00000256530 | 5.13E-15 | -2.63127 | 1 | 1 AC019294.1     | K01528 |
| ENSG00000256533 | 5.13E-15 | -2.63127 | 1 | 1 RP11-212D19.5  | K18764 |
| ENSG00000256537 | 5.13E-15 | -2.63127 | 1 | 1 RP11-785H5.1   | —      |
| ENSG00000256540 | 5.13E-15 | -2.63127 | 1 | 1 RP11-598F7.6   | —      |
| ENSG00000256542 | 5.13E-15 | -2.63127 | 1 | 1 RP13-895J2.3   | —      |
| ENSG00000256545 | 5.13E-15 | -2.63127 | 1 | 1 AL139819.1     | —      |
| ENSG00000256551 | 5.13E-15 | -2.63127 | 1 | 1 RP13-653N12.1  | —      |
| ENSG00000256552 | 5.13E-15 | -2.63127 | 1 | 1 RP11-113C12.4  | K02974 |
| ENSG00000256553 | 5.13E-15 | -2.63127 | 1 | 1 TRAV1-2        | —      |
| ENSG00000256557 | 5.13E-15 | -2.63127 | 1 | 1 RP11-1060J15.3 | —      |
| ENSG00000256560 | 5.13E-15 | -2.63127 | 1 | 1 RP11-256L11.1  | —      |
| ENSG00000256563 | 5.13E-15 | -2.63127 | 1 | 1 NANOGNBP2      | —      |
| ENSG00000256566 | 5.13E-15 | -2.63127 | 1 | 1 RP4-734P14.4   | K09228 |
| ENSG00000256568 | 5.13E-15 | -2.63127 | 1 | 1 RP11-800A3.3   | —      |
| ENSG00000256569 | 5.13E-15 | -2.63127 | 1 | 1 RP11-173P15.5  | —      |
| ENSG00000256571 | 5.13E-15 | -2.63127 | 1 | 1 RP11-274J7.2   | —      |
| ENSG00000256574 | 5.13E-15 | -2.63127 | 1 | 1 OR13A1         | K04257 |
| ENSG00000256577 | 5.13E-15 | -2.63127 | 1 | 1 RP11-283I3.2   | —      |
| ENSG00000256579 | 5.13E-15 | -2.63127 | 1 | 1 AC135776.1     | —      |
| ENSG00000256581 | 5.13E-15 | -2.63127 | 1 | 1 NLRP9P         | —      |
| ENSG00000256582 | 5.13E-15 | -2.63127 | 1 | 1 RP11-75L1.1    | —      |
| ENSG00000256586 | 5.13E-15 | -2.63127 | 1 | 1 AC091171.1     | —      |
| ENSG00000256589 | 5.13E-15 | -2.63127 | 1 | 1 ENPP7P5        | K12354 |
| ENSG00000256590 | 5.13E-15 | -2.63127 | 1 | 1 TRDV3          | —      |
| ENSG00000256594 | 5.13E-15 | -2.63127 | 1 | 1 RP11-705C15.2  | K10072 |

|                 |          |          |   |                  |        |
|-----------------|----------|----------|---|------------------|--------|
| ENSG00000256596 | 5.13E-15 | -2.63127 | 1 | 1 RP11-522N14.2  | -      |
| ENSG00000256597 | 5.13E-15 | -2.63127 | 1 | 1 RP11-749H20.4  | -      |
| ENSG00000256599 | 5.13E-15 | -2.63127 | 1 | 1 AC020663.1     | -      |
| ENSG00000256603 | 5.13E-15 | -2.63127 | 1 | 1 RP11-667M19.2  | -      |
| ENSG00000256609 | 5.13E-15 | -2.63127 | 1 | 1 RP11-64B16.4   | -      |
| ENSG00000256614 | 5.13E-15 | -2.63127 | 1 | 1 RP13-7D7.1     | K18532 |
| ENSG00000256615 | 5.13E-15 | -2.63127 | 1 | 1 RP11-59N23.3   | -      |
| ENSG00000256618 | 5.13E-15 | -2.63127 | 1 | 1 MTRNR2L1       | K01982 |
| ENSG00000256625 | 5.13E-15 | -2.63127 | 1 | 1 RP11-582E3.4   | -      |
| ENSG00000256626 | 5.13E-15 | -2.63127 | 1 | 1 RP11-133L14.2  | K10070 |
| ENSG00000256627 | 5.13E-15 | -2.63127 | 1 | 1 RP11-6B19.3    | K02992 |
| ENSG00000256629 | 5.13E-15 | -2.63127 | 1 | 1 TAS2R67P       | K08474 |
| ENSG00000256630 | 5.13E-15 | -2.63127 | 1 | 1 RP11-428I12.1  | K02991 |
| ENSG00000256632 | 5.13E-15 | -2.63127 | 1 | 1 RP13-672B3.2   | K13347 |
| ENSG00000256637 | 5.13E-15 | -2.63127 | 1 | 1 RP11-76I14.1   | -      |
| ENSG00000256640 | 5.13E-15 | -2.63127 | 1 | 1 RP11-666F17.2  | -      |
| ENSG00000256642 | 5.13E-15 | -2.63127 | 1 | 1 LINC00273      | -      |
| ENSG00000256643 | 5.13E-15 | -2.63127 | 1 | 1 RP11-349K16.1  | -      |
| ENSG00000256646 | 5.13E-15 | -2.63127 | 1 | 1 PSMA2          | K02726 |
| ENSG00000256651 | 5.13E-15 | -2.63127 | 1 | 1 RP11-144O23.8  | K08474 |
| ENSG00000256654 | 5.13E-15 | -2.63127 | 1 | 1 RP11-429A20.4  | -      |
| ENSG00000256657 | 5.13E-15 | -2.63127 | 1 | 1 RP11-144O23.20 | -      |
| ENSG00000256658 | 5.13E-15 | -2.63127 | 1 | 1 RP11-180M15.4  | -      |
| ENSG00000256659 | 5.13E-15 | -2.63127 | 1 | 1 RP13-653N12.2  | -      |
| ENSG00000256660 | 5.13E-15 | -2.63127 | 1 | 1 CLEC12B        | K17517 |
| ENSG00000256661 | 5.13E-15 | -2.63127 | 1 | 1 A2ML1-AS1      | -      |
| ENSG00000256664 | 5.13E-15 | -2.63127 | 1 | 1 RP11-611O2.3   | K01296 |
| ENSG00000256670 | 5.13E-15 | -2.63127 | 1 | 1 RP11-338E21.1  | -      |
| ENSG00000256672 | 5.13E-15 | -2.63127 | 1 | 1 RP11-218M22.2  | -      |
| ENSG00000256674 | 5.13E-15 | -2.63127 | 1 | 1 RP11-172C16.4  | K06067 |
| ENSG00000256678 | 5.13E-15 | -2.63127 | 1 | 1 RP11-611O2.2   | -      |
| ENSG00000256681 | 5.13E-15 | -2.63127 | 1 | 1 CCDC58P5       | K16741 |
| ENSG00000256682 | 5.13E-15 | -2.63127 | 1 | 1 TAS2R12        | -      |
| ENSG00000256684 | 5.13E-15 | -2.63127 | 1 | 1 RP11-49K4.2    | -      |
| ENSG00000256686 | 5.13E-15 | -2.63127 | 1 | 1 RP11-443N24.2  | -      |
| ENSG00000256691 | 5.13E-15 | -2.63127 | 1 | 1 RP11-476M19.3  | -      |
| ENSG00000256692 | 5.13E-15 | -2.63127 | 1 | 1 AC139099.1     | K14404 |
| ENSG00000256694 | 5.13E-15 | -2.63127 | 1 | 1 RP11-598F7.5   | -      |
| ENSG00000256695 | 5.13E-15 | -2.63127 | 1 | 1 RP1-166H1.2    | -      |
| ENSG00000256699 | 5.13E-15 | -2.63127 | 1 | 1 RP11-669N7.3   | -      |
| ENSG00000256704 | 5.13E-15 | -2.63127 | 1 | 1 SDCCAG3P1      | -      |
| ENSG00000256705 | 5.13E-15 | -2.63127 | 1 | 1 CTD-2017C7.1   | -      |
| ENSG00000256706 | 5.13E-15 | -2.63127 | 1 | 1 RP5-1096D14.3  | -      |
| ENSG00000256708 | 5.13E-15 | -2.63127 | 1 | 1 RP11-444B24.2  | K02888 |
| ENSG00000256709 | 5.13E-15 | -2.63127 | 1 | 1 AL139812.1     | K00746 |
| ENSG00000256712 | 5.13E-15 | -2.63127 | 1 | 1 RP11-785H5.2   | -      |
| ENSG00000256713 | 5.13E-15 | -2.63127 | 1 | 1 PGA5           | K06002 |
| ENSG00000256714 | 5.13E-15 | -2.63127 | 1 | 1 RP11-73M14.1   | -      |
| ENSG00000256715 | 5.13E-15 | -2.63127 | 1 | 1 AL050302.1     | -      |
| ENSG00000256717 | 5.13E-15 | -2.63127 | 1 | 1 AP000797.3     | -      |
| ENSG00000256721 | 5.13E-15 | -2.63127 | 1 | 1 CACNA1C-IT3    | -      |
| ENSG00000256723 | 5.13E-15 | -2.63127 | 1 | 1 RP11-167N4.4   | -      |
| ENSG00000256725 | 5.13E-15 | -2.63127 | 1 | 1 RP11-662M24.2  | -      |
| ENSG00000256732 | 5.13E-15 | -2.63127 | 1 | 1 RP11-407A16.3  | -      |
| ENSG00000256733 | 5.13E-15 | -2.63127 | 1 | 1 RP11-881M11.8  | -      |
| ENSG00000256734 | 5.13E-15 | -2.63127 | 1 | 1 RP11-613F22.7  | -      |
| ENSG00000256737 | 5.13E-15 | -2.63127 | 1 | 1 RBBP4P5        | K10752 |
| ENSG00000256742 | 5.13E-15 | -2.63127 | 1 | 1 RP13-941N14.1  | -      |

|                 |          |          |   |                    |        |
|-----------------|----------|----------|---|--------------------|--------|
| ENSG00000256747 | 5.13E-15 | -2.63127 | 1 | 1 RP11-860B13.1    | --     |
| ENSG00000256748 | 5.13E-15 | -2.63127 | 1 | 1 RP11-234B24.5    | --     |
| ENSG00000256750 | 5.13E-15 | -2.63127 | 1 | 1 RP11-3L23.2      | --     |
| ENSG00000256751 | 5.13E-15 | -2.63127 | 1 | 1 RP11-695J4.2     | --     |
| ENSG00000256752 | 5.13E-15 | -2.63127 | 1 | 1 HPRTP3           | K00760 |
| ENSG00000256756 | 5.13E-15 | -2.63127 | 1 | 1 RP11-871F6.2     | K17795 |
| ENSG00000256757 | 5.13E-15 | -2.63127 | 1 | 1 RP11-159N11.3    | --     |
| ENSG00000256761 | 5.13E-15 | -2.63127 | 1 | 1 AL008733.1       | --     |
| ENSG00000256762 | 5.13E-15 | -2.63127 | 1 | 1 STH              | --     |
| ENSG00000256763 | 5.13E-15 | -2.63127 | 1 | 1 RP1-116K23.1     | --     |
| ENSG00000256769 | 5.13E-15 | -2.63127 | 1 | 1 CACNA1C-AS3      | --     |
| ENSG00000256774 | 5.13E-15 | -2.63127 | 1 | 1 RP11-268P4.2     | --     |
| ENSG00000256777 | 5.13E-15 | -2.63127 | 1 | 1 PDCL3P7          | --     |
| ENSG00000256779 | 5.13E-15 | -2.63127 | 1 | 1 RP11-60C6.5      | K12891 |
| ENSG00000256783 | 5.13E-15 | -2.63127 | 1 | 1 RP11-503G7.1     | --     |
| ENSG00000256786 | 5.13E-15 | -2.63127 | 1 | 1 AP001029.1       | --     |
| ENSG00000256789 | 5.13E-15 | -2.63127 | 1 | 1 RP11-697H9.2     | --     |
| ENSG00000256790 | 5.13E-15 | -2.63127 | 1 | 1 RP11-429A20.3    | --     |
| ENSG00000256797 | 5.13E-15 | -2.63127 | 1 | 1 KLRF2            | --     |
| ENSG00000256799 | 5.13E-15 | -2.63127 | 1 | 1 RP11-500M8.6     | K07887 |
| ENSG00000256802 | 5.13E-15 | -2.63127 | 1 | 1 RP11-680F8.1     | --     |
| ENSG00000256803 | 5.13E-15 | -2.63127 | 1 | 1 RP11-133L14.5    | --     |
| ENSG00000256804 | 5.13E-15 | -2.63127 | 1 | 1 RP13-977J11.5    | --     |
| ENSG00000256806 | 5.13E-15 | -2.63127 | 1 | 1 AC004706.1       | --     |
| ENSG00000256810 | 5.13E-15 | -2.63127 | 1 | 1 RP11-76C10.2     | --     |
| ENSG00000256811 | 5.13E-15 | -2.63127 | 1 | 1 RP11-7M8.2       | --     |
| ENSG00000256813 | 5.13E-15 | -2.63127 | 1 | 1 RP11-804A23.4    | --     |
| ENSG00000256814 | 5.13E-15 | -2.63127 | 1 | 1 RP11-158L12.5    | --     |
| ENSG00000256815 | 5.13E-15 | -2.63127 | 1 | 1 AL590325.2       | --     |
| ENSG00000256818 | 5.13E-15 | -2.63127 | 1 | 1 AP001069.1       | --     |
| ENSG00000256822 | 5.13E-15 | -2.63127 | 1 | 1 AC084125.2       | K16467 |
| ENSG00000256825 | 5.13E-15 | -2.63127 | 1 | 1 CTD-2140B24.4    | K09228 |
| ENSG00000256826 | 5.13E-15 | -2.63127 | 1 | 1 AC138744.2       | K02130 |
| ENSG00000256827 | 5.13E-15 | -2.63127 | 1 | 1 RP11-214K3.5     | --     |
| ENSG00000256835 | 5.13E-15 | -2.63127 | 1 | 1 GS1-410F4.5      | K09228 |
| ENSG00000256837 | 5.13E-15 | -2.63127 | 1 | 1 CACNA1C-IT1      | --     |
| ENSG00000256844 | 5.13E-15 | -2.63127 | 1 | 1 RP11-282K24.2    | --     |
| ENSG00000256845 | 5.13E-15 | -2.63127 | 1 | 1 AC007401.1       | K11447 |
| ENSG00000256847 | 5.13E-15 | -2.63127 | 1 | 1 CCND2P1          | K10151 |
| ENSG00000256851 | 5.13E-15 | -2.63127 | 1 | 1 XXbac-BPG16N22.5 | --     |
| ENSG00000256852 | 5.13E-15 | -2.63127 | 1 | 1 KNOP1P1          | --     |
| ENSG00000256861 | 5.13E-15 | -2.63127 | 1 | 1 RP11-512M8.5     | K10522 |
| ENSG00000256862 | 5.13E-15 | -2.63127 | 1 | 1 RP11-664D1.1     | --     |
| ENSG00000256863 | 5.13E-15 | -2.63127 | 1 | 1 RP11-959F10.6    | K08206 |
| ENSG00000256870 | 5.13E-15 | -2.63127 | 1 | 1 SLC5A8           | K14388 |
| ENSG00000256873 | 5.13E-15 | -2.63127 | 1 | 1 AL021977.1       | --     |
| ENSG00000256874 | 5.13E-15 | -2.63127 | 1 | 1 AL080274.1       | --     |
| ENSG00000256875 | 5.13E-15 | -2.63127 | 1 | 1 RP11-503G7.2     | --     |
| ENSG00000256878 | 5.13E-15 | -2.63127 | 1 | 1 AC087897.1       | --     |
| ENSG00000256882 | 5.13E-15 | -2.63127 | 1 | 1 AC091320.1       | --     |
| ENSG00000256884 | 5.13E-15 | -2.63127 | 1 | 1 RP11-64B16.3     | --     |
| ENSG00000256888 | 5.13E-15 | -2.63127 | 1 | 1 RP13-81N3.2      | --     |
| ENSG00000256889 | 5.13E-15 | -2.63127 | 1 | 1 AC093847.1       | --     |
| ENSG00000256892 | 5.13E-15 | -2.63127 | 1 | 1 MTRNR2L7         | K01982 |
| ENSG00000256896 | 5.13E-15 | -2.63127 | 1 | 1 PSMC1P8          | K03062 |
| ENSG00000256902 | 5.13E-15 | -2.63127 | 1 | 1 RP11-986G18.1    | K12495 |
| ENSG00000256904 | 5.13E-15 | -2.63127 | 1 | 1 A2ML1-AS2        | --     |
| ENSG00000256905 | 5.13E-15 | -2.63127 | 1 | 1 AC090571.1       | --     |



|                 |          |          |   |                 |        |
|-----------------|----------|----------|---|-----------------|--------|
| ENSG00000256906 | 5.13E-15 | -2.63127 | 1 | 1 RP11-474D1.2  | -      |
| ENSG00000256912 | 5.13E-15 | -2.63127 | 1 | 1 RP11-75L1.6   | -      |
| ENSG00000256913 | 5.13E-15 | -2.63127 | 1 | 1 RP1-102E24.6  | K12642 |
| ENSG00000256915 | 5.13E-15 | -2.63127 | 1 | 1 RP11-221N13.4 | -      |
| ENSG00000256917 | 5.13E-15 | -2.63127 | 1 | 1 RP11-81H14.4  | -      |
| ENSG00000256922 | 5.13E-15 | -2.63127 | 1 | 1 RP11-749H20.1 | -      |
| ENSG00000256923 | 5.13E-15 | -2.63127 | 1 | 1 RP11-449P1.1  | -      |
| ENSG00000256925 | 5.13E-15 | -2.63127 | 1 | 1 GPR123-AS1    | -      |
| ENSG00000256927 | 5.13E-15 | -2.63127 | 1 | 1 RP5-944M2.2   | -      |
| ENSG00000256928 | 5.13E-15 | -2.63127 | 1 | 1 RP11-809N8.2  | -      |
| ENSG00000256929 | 5.13E-15 | -2.63127 | 1 | 1 AC067852.1    | -      |
| ENSG00000256943 | 5.13E-15 | -2.63127 | 1 | 1 RP13-895J2.2  | -      |
| ENSG00000256947 | 5.13E-15 | -2.63127 | 1 | 1 RP11-64D24.2  | -      |
| ENSG00000256948 | 5.13E-15 | -2.63127 | 1 | 1 RP11-598F7.3  | -      |
| ENSG00000256951 | 5.13E-15 | -2.63127 | 1 | 1 AC055876.1    | -      |
| ENSG00000256953 | 5.13E-15 | -2.63127 | 1 | 1 RP11-6B19.2   | -      |
| ENSG00000256963 | 5.13E-15 | -2.63127 | 1 | 1 RP11-216P16.4 | -      |
| ENSG00000256969 | 5.13E-15 | -2.63127 | 1 | 1 RP11-320N7.2  | -      |
| ENSG00000256971 | 5.13E-15 | -2.63127 | 1 | 1 LINC00508     | -      |
| ENSG00000256972 | 5.13E-15 | -2.63127 | 1 | 1 AP000462.3    | -      |
| ENSG00000256973 | 5.13E-15 | -2.63127 | 1 | 1 RP11-359J14.2 | -      |
| ENSG00000256975 | 5.13E-15 | -2.63127 | 1 | 1 RP11-525E9.1  | -      |
| ENSG00000256977 | 5.13E-15 | -2.63127 | 1 | 1 LIMS3         | -      |
| ENSG00000256984 | 5.13E-15 | -2.63127 | 1 | 1 RP11-551L14.6 | -      |
| ENSG00000256986 | 5.13E-15 | -2.63127 | 1 | 1 RP11-313F23.2 | -      |
| ENSG00000256987 | 5.13E-15 | -2.63127 | 1 | 1 RP11-428G5.7  | K15434 |
| ENSG00000256988 | 5.13E-15 | -2.63127 | 1 | 1 RP11-234B24.4 | -      |
| ENSG00000256989 | 5.13E-15 | -2.63127 | 1 | 1 AC010335.1    | -      |
| ENSG00000256994 | 5.13E-15 | -2.63127 | 1 | 1 RP11-871F6.3  | -      |
| ENSG00000256995 | 5.13E-15 | -2.63127 | 1 | 1 RP11-114G22.1 | -      |
| ENSG00000257000 | 5.13E-15 | -2.63127 | 1 | 1 RP13-820C6.2  | -      |
| ENSG00000257002 | 5.13E-15 | -2.63127 | 1 | 1 AP000438.2    | -      |
| ENSG00000257004 | 5.13E-15 | -2.63127 | 1 | 1 RP11-180M15.3 | -      |
| ENSG00000257005 | 5.13E-15 | -2.63127 | 1 | 1 RP11-972L6.2  | -      |
| ENSG00000257008 | 5.13E-15 | -2.63127 | 1 | 1 GPR142        | K08430 |
| ENSG00000257009 | 5.13E-15 | -2.63127 | 1 | 1 RP11-685B13.2 | -      |
| ENSG00000257010 | 5.13E-15 | -2.63127 | 1 | 1 AC140481.1    | K17299 |
| ENSG00000257012 | 5.13E-15 | -2.63127 | 1 | 1 RP11-60C6.6   | K06709 |
| ENSG00000257016 | 5.13E-15 | -2.63127 | 1 | 1 SLC25A39P2    | -      |
| ENSG00000257017 | 5.13E-15 | -2.63127 | 1 | 1 HP            | K16142 |
| ENSG00000257019 | 5.13E-15 | -2.63127 | 1 | 1 OR13C2        | K04257 |
| ENSG00000257021 | 5.13E-15 | -2.63127 | 1 | 1 HSPE1P20      | K04078 |
| ENSG00000257022 | 5.13E-15 | -2.63127 | 1 | 1 RP11-729I10.2 | -      |
| ENSG00000257023 | 5.13E-15 | -2.63127 | 1 | 1 RP11-268P4.4  | -      |
| ENSG00000257025 | 5.13E-15 | -2.63127 | 1 | 1 RP11-553N19.1 | -      |
| ENSG00000257026 | 5.13E-15 | -2.63127 | 1 | 1 AC040173.1    | -      |
| ENSG00000257027 | 5.13E-15 | -2.63127 | 1 | 1 RP11-705C15.3 | -      |
| ENSG00000257028 | 5.13E-15 | -2.63127 | 1 | 1 C15ORF37      | K16580 |
| ENSG00000257033 | 5.13E-15 | -2.63127 | 1 | 1 AL391357.1    | K05688 |
| ENSG00000257034 | 5.13E-15 | -2.63127 | 1 | 1 AL021707.2    | -      |
| ENSG00000257035 | 5.13E-15 | -2.63127 | 1 | 1 RP11-351O2.2  | K17599 |
| ENSG00000257037 | 5.13E-15 | -2.63127 | 1 | 1 RP13-200J3.2  | K01887 |
| ENSG00000257040 | 5.13E-15 | -2.63127 | 1 | 1 AC005477.1    | -      |
| ENSG00000257042 | 5.13E-15 | -2.63127 | 1 | 1 RP11-993B23.3 | -      |
| ENSG00000257043 | 5.13E-15 | -2.63127 | 1 | 1 RP11-137N23.1 | K12892 |
| ENSG00000257045 | 5.13E-15 | -2.63127 | 1 | 1 RP11-486F17.1 | -      |
| ENSG00000257046 | 5.13E-15 | -2.63127 | 1 | 1 LST3          | K05043 |
| ENSG00000257048 | 5.13E-15 | -2.63127 | 1 | 1 RP11-476M19.2 | -      |

|                 |          |          |   |                  |        |
|-----------------|----------|----------|---|------------------|--------|
| ENSG00000257053 | 5.13E-15 | -2.63127 | 1 | 1 Z98941.1       | -      |
| ENSG00000257056 | 5.13E-15 | -2.63127 | 1 | 1 RP11-966I7.2   | -      |
| ENSG00000257057 | 5.13E-15 | -2.63127 | 1 | 1 LINC01171      | -      |
| ENSG00000257060 | 5.13E-15 | -2.63127 | 1 | 1 RP11-266O8.1   | -      |
| ENSG00000257061 | 5.13E-15 | -2.63127 | 1 | 1 RP4-809F18.2   | -      |
| ENSG00000257062 | 5.13E-15 | -2.63127 | 1 | 1 RP11-125O5.2   | K05043 |
| ENSG00000257065 | 5.13E-15 | -2.63127 | 1 | 1 RP3-468K18.5   | K14798 |
| ENSG00000257067 | 5.13E-15 | -2.63127 | 1 | 1 AP000797.4     | -      |
| ENSG00000257070 | 5.13E-15 | -2.63127 | 1 | 1 RP11-667M19.4  | K02270 |
| ENSG00000257073 | 5.13E-15 | -2.63127 | 1 | 1 AC011933.1     | -      |
| ENSG00000257074 | 5.13E-15 | -2.63127 | 1 | 1 RPL29P33       | K02905 |
| ENSG00000257075 | 5.13E-15 | -2.63127 | 1 | 1 RPEP6          | -      |
| ENSG00000257078 | 5.13E-15 | -2.63127 | 1 | 1 RP3-461F17.2   | K09229 |
| ENSG00000257083 | 5.13E-15 | -2.63127 | 1 | 1 RP11-123O10.3  | -      |
| ENSG00000257084 | 5.13E-15 | -2.63127 | 1 | 1 U47924.27      | -      |
| ENSG00000257087 | 5.13E-15 | -2.63127 | 1 | 1 RP11-136I14.3  | K13625 |
| ENSG00000257088 | 5.13E-15 | -2.63127 | 1 | 1 PNMA6D         | -      |
| ENSG00000257094 | 5.13E-15 | -2.63127 | 1 | 1 RP11-50I19.1   | K18171 |
| ENSG00000257095 | 5.13E-15 | -2.63127 | 1 | 1 RP11-364C11.2  | -      |
| ENSG00000257096 | 5.13E-15 | -2.63127 | 1 | 1 AE000658.22    | -      |
| ENSG00000257101 | 5.13E-15 | -2.63127 | 1 | 1 LRRC37A13P     | -      |
| ENSG00000257105 | 5.13E-15 | -2.63127 | 1 | 1 RP11-259O18.4  | -      |
| ENSG00000257109 | 5.13E-15 | -2.63127 | 1 | 1 OR4F28P        | K04257 |
| ENSG00000257110 | 5.13E-15 | -2.63127 | 1 | 1 AL354808.1     | -      |
| ENSG00000257113 | 5.13E-15 | -2.63127 | 1 | 1 RP11-274M17.2  | K09521 |
| ENSG00000257114 | 5.13E-15 | -2.63127 | 1 | 1 RP11-25I15.3   | -      |
| ENSG00000257115 | 5.13E-15 | -2.63127 | 1 | 1 OR11H12        | K04257 |
| ENSG00000257119 | 5.13E-15 | -2.63127 | 1 | 1 EEF1B2P4       | K03232 |
| ENSG00000257120 | 5.13E-15 | -2.63127 | 1 | 1 CTD-2503I6.1   | -      |
| ENSG00000257121 | 5.13E-15 | -2.63127 | 1 | 1 RP11-129B9.2   | K11188 |
| ENSG00000257124 | 5.13E-15 | -2.63127 | 1 | 1 RP11-384P14.1  | -      |
| ENSG00000257125 | 5.13E-15 | -2.63127 | 1 | 1 KRT127P        | K07605 |
| ENSG00000257126 | 5.13E-15 | -2.63127 | 1 | 1 RP11-966I7.1   | -      |
| ENSG00000257127 | 5.13E-15 | -2.63127 | 1 | 1 CLLU1          | K12581 |
| ENSG00000257128 | 5.13E-15 | -2.63127 | 1 | 1 RP11-2A1.1     | -      |
| ENSG00000257129 | 5.13E-15 | -2.63127 | 1 | 1 RP11-554D14.1  | -      |
| ENSG00000257138 | 5.13E-15 | -2.63127 | 1 | 1 TAS2R38        | K08474 |
| ENSG00000257139 | 5.13E-15 | -2.63127 | 1 | 1 RP11-320P7.2   | -      |
| ENSG00000257141 | 5.13E-15 | -2.63127 | 1 | 1 RP11-554D14.7  | -      |
| ENSG00000257142 | 5.13E-15 | -2.63127 | 1 | 1 RP11-536C10.19 | K13356 |
| ENSG00000257146 | 5.13E-15 | -2.63127 | 1 | 1 RP11-813P10.1  | -      |
| ENSG00000257151 | 5.13E-15 | -2.63127 | 1 | 1 PWAR6          | -      |
| ENSG00000257155 | 5.13E-15 | -2.63127 | 1 | 1 CTD-2213F21.3  | -      |
| ENSG00000257156 | 5.13E-15 | -2.63127 | 1 | 1 RP11-13A1.3    | -      |
| ENSG00000257157 | 5.13E-15 | -2.63127 | 1 | 1 RP11-528M18.3  | K13807 |
| ENSG00000257159 | 5.13E-15 | -2.63127 | 1 | 1 RP11-58A17.3   | K09228 |
| ENSG00000257162 | 5.13E-15 | -2.63127 | 1 | 1 MED15P6        | K15157 |
| ENSG00000257164 | 5.13E-15 | -2.63127 | 1 | 1 RP11-25I15.2   | -      |
| ENSG00000257165 | 5.13E-15 | -2.63127 | 1 | 1 RP11-171L9.1   | -      |
| ENSG00000257169 | 5.13E-15 | -2.63127 | 1 | 1 RP11-117N2.2   | K11087 |
| ENSG00000257171 | 5.13E-15 | -2.63127 | 1 | 1 RP11-754I20.3  | K09228 |
| ENSG00000257173 | 5.13E-15 | -2.63127 | 1 | 1 RP11-297L6.2   | K18532 |
| ENSG00000257176 | 5.13E-15 | -2.63127 | 1 | 1 RP11-996F15.2  | -      |
| ENSG00000257178 | 5.13E-15 | -2.63127 | 1 | 1 MIR10A         | -      |
| ENSG00000257179 | 5.13E-15 | -2.63127 | 1 | 1 HMGN2P6        | K11300 |
| ENSG00000257180 | 5.13E-15 | -2.63127 | 1 | 1 RP11-509E10.1  | -      |
| ENSG00000257181 | 5.13E-15 | -2.63127 | 1 | 1 RP11-611O2.5   | -      |
| ENSG00000257183 | 5.13E-15 | -2.63127 | 1 | 1 RP11-274M17.3  | -      |

|                 |          |          |   |                 |        |
|-----------------|----------|----------|---|-----------------|--------|
| ENSG00000257185 | 5.13E-15 | -2.63127 | 1 | 1 RP11-626P14.2 | -      |
| ENSG00000257191 | 5.13E-15 | -2.63127 | 1 | 1 RP11-390N6.1  | -      |
| ENSG00000257194 | 5.13E-15 | -2.63127 | 1 | 1 RP11-567C2.1  | -      |
| ENSG00000257195 | 5.13E-15 | -2.63127 | 1 | 1 HNRNPA1P50    | K12741 |
| ENSG00000257198 | 5.13E-15 | -2.63127 | 1 | 1 FAM205B       | -      |
| ENSG00000257199 | 5.13E-15 | -2.63127 | 1 | 1 RP11-669B18.1 | K15306 |
| ENSG00000257202 | 5.13E-15 | -2.63127 | 1 | 1 RP11-512N21.3 | -      |
| ENSG00000257210 | 5.13E-15 | -2.63127 | 1 | 1 NACAP3        | K03626 |
| ENSG00000257220 | 5.13E-15 | -2.63127 | 1 | 1 RP11-136F16.2 | -      |
| ENSG00000257224 | 5.13E-15 | -2.63127 | 1 | 1 RP11-536C10.9 | K13241 |
| ENSG00000257225 | 5.13E-15 | -2.63127 | 1 | 1 RP11-328C8.4  | -      |
| ENSG00000257226 | 5.13E-15 | -2.63127 | 1 | 1 CTD-2252P21.1 | -      |
| ENSG00000257227 | 5.13E-15 | -2.63127 | 1 | 1 DUXAP10       | -      |
| ENSG00000257228 | 5.13E-15 | -2.63127 | 1 | 1 RP11-413B19.2 | -      |
| ENSG00000257231 | 5.13E-15 | -2.63127 | 1 | 1 RP11-438N16.2 | K10418 |
| ENSG00000257235 | 5.13E-15 | -2.63127 | 1 | 1 RP11-848D3.5  | -      |
| ENSG00000257237 | 5.13E-15 | -2.63127 | 1 | 1 RP11-554L12.2 | -      |
| ENSG00000257239 | 5.13E-15 | -2.63127 | 1 | 1 RP11-630C16.2 | -      |
| ENSG00000257252 | 5.13E-15 | -2.63127 | 1 | 1 RP11-486A14.2 | -      |
| ENSG00000257253 | 5.13E-15 | -2.63127 | 1 | 1 RP11-70F11.7  | -      |
| ENSG00000257254 | 5.13E-15 | -2.63127 | 1 | 1 RP11-210L7.1  | -      |
| ENSG00000257258 | 5.13E-15 | -2.63127 | 1 | 1 RP11-946L16.1 | -      |
| ENSG00000257259 | 5.13E-15 | -2.63127 | 1 | 1 RP11-767I20.1 | -      |
| ENSG00000257262 | 5.13E-15 | -2.63127 | 1 | 1 RP11-776A13.1 | -      |
| ENSG00000257264 | 5.13E-15 | -2.63127 | 1 | 1 MIR3179-1     | -      |
| ENSG00000257265 | 5.13E-15 | -2.63127 | 1 | 1 CTD-2021H9.1  | -      |
| ENSG00000257268 | 5.13E-15 | -2.63127 | 1 | 1 RP1-74B13.2   | -      |
| ENSG00000257270 | 5.13E-15 | -2.63127 | 1 | 1 RP11-521B24.5 | -      |
| ENSG00000257271 | 5.13E-15 | -2.63127 | 1 | 1 KIRREL3-AS1   | -      |
| ENSG00000257275 | 5.13E-15 | -2.63127 | 1 | 1 RP11-164H13.1 | -      |
| ENSG00000257277 | 5.13E-15 | -2.63127 | 1 | 1 RP11-434H14.1 | -      |
| ENSG00000257281 | 5.13E-15 | -2.63127 | 1 | 1 RP11-1K3.1    | K18750 |
| ENSG00000257284 | 5.13E-15 | -2.63127 | 1 | 1 RP11-190J23.1 | -      |
| ENSG00000257286 | 5.13E-15 | -2.63127 | 1 | 1 RP11-545P7.4  | -      |
| ENSG00000257287 | 5.13E-15 | -2.63127 | 1 | 1 RP11-98E6.1   | K11253 |
| ENSG00000257288 | 5.13E-15 | -2.63127 | 1 | 1 RP11-557F20.2 | -      |
| ENSG00000257292 | 5.13E-15 | -2.63127 | 1 | 1 RP11-266O15.4 | -      |
| ENSG00000257294 | 5.13E-15 | -2.63127 | 1 | 1 RP11-316A16.1 | -      |
| ENSG00000257296 | 5.13E-15 | -2.63127 | 1 | 1 RP11-701B6.1  | -      |
| ENSG00000257300 | 5.13E-15 | -2.63127 | 1 | 1 HAUS8P1       | -      |
| ENSG00000257307 | 5.13E-15 | -2.63127 | 1 | 1 RP11-317N8.4  | K13209 |
| ENSG00000257308 | 5.13E-15 | -2.63127 | 1 | 1 RP11-471N19.1 | K10841 |
| ENSG00000257310 | 5.13E-15 | -2.63127 | 1 | 1 RP11-496I2.2  | -      |
| ENSG00000257316 | 5.13E-15 | -2.63127 | 1 | 1 RP11-267D19.2 | K01940 |
| ENSG00000257319 | 5.13E-15 | -2.63127 | 1 | 1 RP11-478B9.1  | -      |
| ENSG00000257322 | 5.13E-15 | -2.63127 | 1 | 1 RP11-511B23.2 | -      |
| ENSG00000257323 | 5.13E-15 | -2.63127 | 1 | 1 RP11-361A23.1 | -      |
| ENSG00000257325 | 5.13E-15 | -2.63127 | 1 | 1 RP11-263E1.1  | -      |
| ENSG00000257329 | 5.13E-15 | -2.63127 | 1 | 1 RP11-290L1.5  | -      |
| ENSG00000257331 | 5.13E-15 | -2.63127 | 1 | 1 RP11-478B9.3  | K16733 |
| ENSG00000257332 | 5.13E-15 | -2.63127 | 1 | 1 HNRNPA1P69    | K12741 |
| ENSG00000257335 | 5.13E-15 | -2.63127 | 1 | 1 MGAM          | K12047 |
| ENSG00000257341 | 5.13E-15 | -2.63127 | 1 | 1 CRIP1         | -      |
| ENSG00000257342 | 5.13E-15 | -2.63127 | 1 | 1 RP11-571M6.7  | -      |
| ENSG00000257343 | 5.13E-15 | -2.63127 | 1 | 1 RP11-641A6.8  | K07605 |
| ENSG00000257345 | 5.13E-15 | -2.63127 | 1 | 1 RP11-511B23.1 | -      |
| ENSG00000257346 | 5.13E-15 | -2.63127 | 1 | 1 RP11-386G11.8 | -      |
| ENSG00000257350 | 5.13E-15 | -2.63127 | 1 | 1 RP11-616L12.4 | K09415 |

|                 |          |          |   |                   |        |
|-----------------|----------|----------|---|-------------------|--------|
| ENSG00000257355 | 5.13E-15 | -2.63127 | 1 | 1 CTD-2006C1.10   | K09228 |
| ENSG00000257356 | 5.13E-15 | -2.63127 | 1 | 1 RP11-754I20.2   | --     |
| ENSG00000257357 | 5.13E-15 | -2.63127 | 1 | 1 RP11-244H18.3   | --     |
| ENSG00000257359 | 5.13E-15 | -2.63127 | 1 | 1 RP11-780K2.1    | --     |
| ENSG00000257360 | 5.13E-15 | -2.63127 | 1 | 1 RP11-74K11.1    | --     |
| ENSG00000257364 | 5.13E-15 | -2.63127 | 1 | 1 RP11-81H3.1     | --     |
| ENSG00000257366 | 5.13E-15 | -2.63127 | 1 | 1 MIR3180-2       | --     |
| ENSG00000257368 | 5.13E-15 | -2.63127 | 1 | 1 RP11-438E8.2    | --     |
| ENSG00000257373 | 5.13E-15 | -2.63127 | 1 | 1 RP11-547C5.2    | --     |
| ENSG00000257376 | 5.13E-15 | -2.63127 | 1 | 1 RP11-328C8.2    | K15516 |
| ENSG00000257378 | 5.13E-15 | -2.63127 | 1 | 1 RP11-469H8.8    | --     |
| ENSG00000257379 | 5.13E-15 | -2.63127 | 1 | 1 RP11-793H13.8   | --     |
| ENSG00000257381 | 5.13E-15 | -2.63127 | 1 | 1 MIR3179-2       | --     |
| ENSG00000257386 | 5.13E-15 | -2.63127 | 1 | 1 RP11-56G10.2    | --     |
| ENSG00000257389 | 5.13E-15 | -2.63127 | 1 | 1 RP11-153F5.3    | --     |
| ENSG00000257391 | 5.13E-15 | -2.63127 | 1 | 1 MIR3180-4       | --     |
| ENSG00000257392 | 5.13E-15 | -2.63127 | 1 | 1 RP11-554D14.5   | --     |
| ENSG00000257395 | 5.13E-15 | -2.63127 | 1 | 1 RP11-597A11.2   | --     |
| ENSG00000257398 | 5.13E-15 | -2.63127 | 1 | 1 RP11-554D14.6   | --     |
| ENSG00000257400 | 5.13E-15 | -2.63127 | 1 | 1 RP11-778J16.3   | --     |
| ENSG00000257402 | 5.13E-15 | -2.63127 | 1 | 1 KRT126P         | K07605 |
| ENSG00000257404 | 5.13E-15 | -2.63127 | 1 | 1 RP11-153F5.2    | --     |
| ENSG00000257405 | 5.13E-15 | -2.63127 | 1 | 1 RP11-609L23.2   | --     |
| ENSG00000257407 | 5.13E-15 | -2.63127 | 1 | 1 RP11-1028N23.4  | --     |
| ENSG00000257408 | 5.13E-15 | -2.63127 | 1 | 1 RP11-645C24.4   | --     |
| ENSG00000257411 | 5.13E-15 | -2.63127 | 1 | 1 RP11-603J24.9   | K05084 |
| ENSG00000257414 | 5.13E-15 | -2.63127 | 1 | 1 OR6C73P         | K04257 |
| ENSG00000257415 | 5.13E-15 | -2.63127 | 1 | 1 RP11-626I20.1   | K00252 |
| ENSG00000257426 | 5.13E-15 | -2.63127 | 1 | 1 RP11-554D14.3   | K13886 |
| ENSG00000257429 | 5.13E-15 | -2.63127 | 1 | 1 RP11-272K23.3   | --     |
| ENSG00000257431 | 5.13E-15 | -2.63127 | 1 | 1 RP11-263K4.3    | --     |
| ENSG00000257432 | 5.13E-15 | -2.63127 | 1 | 1 RP11-244H18.4   | K08857 |
| ENSG00000257434 | 5.13E-15 | -2.63127 | 1 | 1 RP11-81K13.1    | --     |
| ENSG00000257435 | 5.13E-15 | -2.63127 | 1 | 1 RP11-267D19.1   | --     |
| ENSG00000257444 | 5.13E-15 | -2.63127 | 1 | 1 SETP7           | K11290 |
| ENSG00000257446 | 5.13E-15 | -2.63127 | 1 | 1 ZNF878          | K09228 |
| ENSG00000257449 | 5.13E-15 | -2.63127 | 1 | 1 RP11-603J24.4   | --     |
| ENSG00000257452 | 5.13E-15 | -2.63127 | 1 | 1 RP1-71H24.1     | --     |
| ENSG00000257453 | 5.13E-15 | -2.63127 | 1 | 1 RP11-290L1.3    | --     |
| ENSG00000257454 | 5.13E-15 | -2.63127 | 1 | 1 CTD-2021H9.2    | --     |
| ENSG00000257458 | 5.13E-15 | -2.63127 | 1 | 1 RP11-473C19.1   | --     |
| ENSG00000257465 | 5.13E-15 | -2.63127 | 1 | 1 TCEB1P32        | K03872 |
| ENSG00000257467 | 5.13E-15 | -2.63127 | 1 | 1 RP11-121G22.3   | --     |
| ENSG00000257470 | 5.13E-15 | -2.63127 | 1 | 1 RP11-397H6.1    | --     |
| ENSG00000257472 | 5.13E-15 | -2.63127 | 1 | 1 RP11-159D23.2   | --     |
| ENSG00000257476 | 5.13E-15 | -2.63127 | 1 | 1 RP11-139B1.1    | --     |
| ENSG00000257477 | 5.13E-15 | -2.63127 | 1 | 1 LINC01154       | --     |
| ENSG00000257480 | 5.13E-15 | -2.63127 | 1 | 1 MRPL2P1         | K02886 |
| ENSG00000257482 | 5.13E-15 | -2.63127 | 1 | 1 ZNF727          | K09228 |
| ENSG00000257493 | 5.13E-15 | -2.63127 | 1 | 1 RP11-536C10.20  | K13356 |
| ENSG00000257494 | 5.13E-15 | -2.63127 | 1 | 1 RP3-521E19.2    | --     |
| ENSG00000257495 | 5.13E-15 | -2.63127 | 1 | 1 RP11-641A6.2    | --     |
| ENSG00000257499 | 5.13E-15 | -2.63127 | 1 | 1 RP11-571M6.8    | --     |
| ENSG00000257500 | 5.13E-15 | -2.63127 | 1 | 1 RP11-1020M18.10 | --     |
| ENSG00000257503 | 5.13E-15 | -2.63127 | 1 | 1 CYB5AP5         | --     |
| ENSG00000257504 | 5.13E-15 | -2.63127 | 1 | 1 RP11-536C10.7   | --     |
| ENSG00000257506 | 5.13E-15 | -2.63127 | 1 | 1 RP11-231C14.5   | K01047 |
| ENSG00000257510 | 5.13E-15 | -2.63127 | 1 | 1 RP11-609L23.1   | --     |

|                 |          |          |   |                  |        |
|-----------------|----------|----------|---|------------------|--------|
| ENSG00000257513 | 5.13E-15 | -2.63127 | 1 | 1 NPIP81P        | K01896 |
| ENSG00000257514 | 5.13E-15 | -2.63127 | 1 | 1 RP11-755O11.2  | --     |
| ENSG00000257515 | 5.13E-15 | -2.63127 | 1 | 1 RP11-498M15.1  | --     |
| ENSG00000257517 | 5.13E-15 | -2.63127 | 1 | 1 RP4-601P9.1    | --     |
| ENSG00000257519 | 5.13E-15 | -2.63127 | 1 | 1 RP11-116D17.2  | --     |
| ENSG00000257520 | 5.13E-15 | -2.63127 | 1 | 1 RP11-896J10.3  | --     |
| ENSG00000257522 | 5.13E-15 | -2.63127 | 1 | 1 RP11-562L8.1   | --     |
| ENSG00000257523 | 5.13E-15 | -2.63127 | 1 | 1 CTD-2384A14.2  | --     |
| ENSG00000257528 | 5.13E-15 | -2.63127 | 1 | 1 KRT8P19        | K07605 |
| ENSG00000257530 | 5.13E-15 | -2.63127 | 1 | 1 RP11-843B15.2  | --     |
| ENSG00000257539 | 5.13E-15 | -2.63127 | 1 | 1 HSPA8P14       | K03283 |
| ENSG00000257541 | 5.13E-15 | -2.63127 | 1 | 1 RP11-58A17.4   | --     |
| ENSG00000257542 | 5.13E-15 | -2.63127 | 1 | 1 OR7E47P        | K04257 |
| ENSG00000257548 | 5.13E-15 | -2.63127 | 1 | 1 RP11-797M17.1  | --     |
| ENSG00000257550 | 5.13E-15 | -2.63127 | 1 | 1 RP11-793H13.3  | --     |
| ENSG00000257551 | 5.13E-15 | -2.63127 | 1 | 1 HLA-AS1        | --     |
| ENSG00000257553 | 5.13E-15 | -2.63127 | 1 | 1 RP11-603J24.17 | --     |
| ENSG00000257556 | 5.13E-15 | -2.63127 | 1 | 1 RP11-44N21.1   | --     |
| ENSG00000257558 | 5.13E-15 | -2.63127 | 1 | 1 RP11-536C10.15 | --     |
| ENSG00000257563 | 5.13E-15 | -2.63127 | 1 | 1 MIR3180-3      | --     |
| ENSG00000257564 | 5.13E-15 | -2.63127 | 1 | 1 RP11-123M21.2  | K07834 |
| ENSG00000257568 | 5.13E-15 | -2.63127 | 1 | 1 RP11-863H1.1   | --     |
| ENSG00000257570 | 5.13E-15 | -2.63127 | 1 | 1 RP11-133N21.12 | K02265 |
| ENSG00000257572 | 5.13E-15 | -2.63127 | 1 | 1 RP11-478B9.2   | K11090 |
| ENSG00000257579 | 5.13E-15 | -2.63127 | 1 | 1 RP11-128P10.1  | --     |
| ENSG00000257580 | 5.13E-15 | -2.63127 | 1 | 1 RP11-718L23.1  | --     |
| ENSG00000257582 | 5.13E-15 | -2.63127 | 1 | 1 RP11-129J12.2  | --     |
| ENSG00000257583 | 5.13E-15 | -2.63127 | 1 | 1 RP11-167N24.4  | --     |
| ENSG00000257585 | 5.13E-15 | -2.63127 | 1 | 1 LINC00609      | --     |
| ENSG00000257586 | 5.13E-15 | -2.63127 | 1 | 1 RP11-554L12.3  | --     |
| ENSG00000257587 | 5.13E-15 | -2.63127 | 1 | 1 RP11-711C17.1  | --     |
| ENSG00000257591 | 5.13E-15 | -2.63127 | 1 | 1 ZNF625         | K09228 |
| ENSG00000257599 | 5.13E-15 | -2.63127 | 1 | 1 OVCH1-AS1      | --     |
| ENSG00000257603 | 5.13E-15 | -2.63127 | 1 | 1 RP11-100F15.1  | --     |
| ENSG00000257604 | 5.13E-15 | -2.63127 | 1 | 1 RP11-359M6.2   | K09228 |
| ENSG00000257607 | 5.13E-15 | -2.63127 | 1 | 1 RP11-449P15.1  | --     |
| ENSG00000257608 | 5.13E-15 | -2.63127 | 1 | 1 GRAMD4P3       | --     |
| ENSG00000257609 | 5.13E-15 | -2.63127 | 1 | 1 RP11-275O18.1  | --     |
| ENSG00000257611 | 5.13E-15 | -2.63127 | 1 | 1 RP11-185N2.1   | --     |
| ENSG00000257612 | 5.13E-15 | -2.63127 | 1 | 1 RP11-384J4.1   | --     |
| ENSG00000257614 | 5.13E-15 | -2.63127 | 1 | 1 RP11-116N8.2   | --     |
| ENSG00000257616 | 5.13E-15 | -2.63127 | 1 | 1 RP11-641A6.5   | K12858 |
| ENSG00000257622 | 5.13E-15 | -2.63127 | 1 | 1 RP11-44N21.4   | --     |
| ENSG00000257629 | 5.13E-15 | -2.63127 | 1 | 1 RP11-13A1.2    | --     |
| ENSG00000257634 | 5.13E-15 | -2.63127 | 1 | 1 RP11-850F7.7   | --     |
| ENSG00000257635 | 5.13E-15 | -2.63127 | 1 | 1 RP11-536C10.10 | K08857 |
| ENSG00000257639 | 5.13E-15 | -2.63127 | 1 | 1 CTB-31N19.2    | K01672 |
| ENSG00000257640 | 5.13E-15 | -2.63127 | 1 | 1 RP11-570L15.2  | --     |
| ENSG00000257642 | 5.13E-15 | -2.63127 | 1 | 1 RP11-474B16.1  | --     |
| ENSG00000257643 | 5.13E-15 | -2.63127 | 1 | 1 RP11-278C7.2   | --     |
| ENSG00000257644 | 5.13E-15 | -2.63127 | 1 | 1 RP11-536C10.13 | K13356 |
| ENSG00000257645 | 5.13E-15 | -2.63127 | 1 | 1 RP11-804F13.2  | --     |
| ENSG00000257647 | 5.13E-15 | -2.63127 | 1 | 1 RP11-701H24.3  | --     |
| ENSG00000257648 | 5.13E-15 | -2.63127 | 1 | 1 CYCSP30        | --     |
| ENSG00000257649 | 5.13E-15 | -2.63127 | 1 | 1 METTL7AP1      | --     |
| ENSG00000257653 | 5.13E-15 | -2.63127 | 1 | 1 RP11-579D7.2   | --     |
| ENSG00000257654 | 5.13E-15 | -2.63127 | 1 | 1 RP11-497G19.2  | --     |
| ENSG00000257657 | 5.13E-15 | -2.63127 | 1 | 1 RP11-352M15.1  | --     |

|                 |          |          |   |                  |        |
|-----------------|----------|----------|---|------------------|--------|
| ENSG00000257658 | 5.13E-15 | -2.63127 | 1 | 1 RP3-521E19.3   | K09522 |
| ENSG00000257662 | 5.13E-15 | -2.63127 | 1 | 1 EIF4A1P12      | K03257 |
| ENSG00000257664 | 5.13E-15 | -2.63127 | 1 | 1 RSL24D1P5      | K02896 |
| ENSG00000257666 | 5.13E-15 | -2.63127 | 1 | 1 CBX3P5         | K11586 |
| ENSG00000257668 | 5.13E-15 | -2.63127 | 1 | 1 RP11-58A17.2   | K09560 |
| ENSG00000257672 | 5.13E-15 | -2.63127 | 1 | 1 RP11-536C10.17 | K13356 |
| ENSG00000257675 | 5.13E-15 | -2.63127 | 1 | 1 RP11-641A6.9   | K10482 |
| ENSG00000257677 | 5.13E-15 | -2.63127 | 1 | 1 RP1-81P11.1    | -      |
| ENSG00000257680 | 5.13E-15 | -2.63127 | 1 | 1 RP11-367O10.1  | K01265 |
| ENSG00000257682 | 5.13E-15 | -2.63127 | 1 | 1 RP11-314D7.3   | -      |
| ENSG00000257683 | 5.13E-15 | -2.63127 | 1 | 1 RP11-110L15.2  | -      |
| ENSG00000257687 | 5.13E-15 | -2.63127 | 1 | 1 RP11-609L23.3  | -      |
| ENSG00000257691 | 5.13E-15 | -2.63127 | 1 | 1 RP11-345J4.1   | K13349 |
| ENSG00000257696 | 5.13E-15 | -2.63127 | 1 | 1 RP11-175P13.2  | -      |
| ENSG00000257700 | 5.13E-15 | -2.63127 | 1 | 1 RP11-641A6.3   | -      |
| ENSG00000257703 | 5.13E-15 | -2.63127 | 1 | 1 RP11-328J6.1   | -      |
| ENSG00000257711 | 5.13E-15 | -2.63127 | 1 | 1 RP11-482D24.2  | -      |
| ENSG00000257715 | 5.13E-15 | -2.63127 | 1 | 1 RP11-256L6.2   | -      |
| ENSG00000257720 | 5.13E-15 | -2.63127 | 1 | 1 ILF2P2         | K13089 |
| ENSG00000257721 | 5.13E-15 | -2.63127 | 1 | 1 RP11-536C10.2  | -      |
| ENSG00000257723 | 5.13E-15 | -2.63127 | 1 | 1 CHCHD3P2       | K17563 |
| ENSG00000257725 | 5.13E-15 | -2.63127 | 1 | 1 RP11-654D12.3  | -      |
| ENSG00000257729 | 5.13E-15 | -2.63127 | 1 | 1 RP11-788H18.1  | -      |
| ENSG00000257730 | 5.13E-15 | -2.63127 | 1 | 1 LSM6P2         | K12625 |
| ENSG00000257731 | 5.13E-15 | -2.63127 | 1 | 1 RP11-536C10.11 | -      |
| ENSG00000257737 | 5.13E-15 | -2.63127 | 1 | 1 RP11-341G23.2  | -      |
| ENSG00000257738 | 5.13E-15 | -2.63127 | 1 | 1 RP11-139E19.2  | -      |
| ENSG00000257741 | 5.13E-15 | -2.63127 | 1 | 1 RP11-540D4.3   | -      |
| ENSG00000257743 | 5.13E-15 | -2.63127 | 1 | 1 RP11-1220K2.2  | K12047 |
| ENSG00000257746 | 5.13E-15 | -2.63127 | 1 | 1 RP11-202G11.2  | -      |
| ENSG00000257747 | 5.13E-15 | -2.63127 | 1 | 1 RP11-362A1.1   | -      |
| ENSG00000257748 | 5.13E-15 | -2.63127 | 1 | 1 RP11-966I7.3   | -      |
| ENSG00000257749 | 5.13E-15 | -2.63127 | 1 | 1 CTD-2314B22.2  | -      |
| ENSG00000257750 | 5.13E-15 | -2.63127 | 1 | 1 RP11-295G12.1  | -      |
| ENSG00000257751 | 5.13E-15 | -2.63127 | 1 | 1 RP11-536C10.21 | -      |
| ENSG00000257754 | 5.13E-15 | -2.63127 | 1 | 1 RP11-650K20.2  | -      |
| ENSG00000257756 | 5.13E-15 | -2.63127 | 1 | 1 RP11-776A13.3  | -      |
| ENSG00000257757 | 5.13E-15 | -2.63127 | 1 | 1 OR6C7P         | K04257 |
| ENSG00000257758 | 5.13E-15 | -2.63127 | 1 | 1 KRT18P20       | K07604 |
| ENSG00000257759 | 5.13E-15 | -2.63127 | 1 | 1 RP11-486O13.4  | -      |
| ENSG00000257761 | 5.13E-15 | -2.63127 | 1 | 1 RP11-186F10.2  | -      |
| ENSG00000257762 | 5.13E-15 | -2.63127 | 1 | 1 RP11-626I20.3  | -      |
| ENSG00000257763 | 5.13E-15 | -2.63127 | 1 | 1 OR5BK1P        | K04257 |
| ENSG00000257764 | 5.13E-15 | -2.63127 | 1 | 1 RP11-1143G9.4  | -      |
| ENSG00000257766 | 5.13E-15 | -2.63127 | 1 | 1 RP11-341G23.3  | -      |
| ENSG00000257767 | 5.13E-15 | -2.63127 | 1 | 1 RP11-162P23.2  | K00128 |
| ENSG00000257769 | 5.13E-15 | -2.63127 | 1 | 1 CTB-193M12.1   | -      |
| ENSG00000257777 | 5.13E-15 | -2.63127 | 1 | 1 RP11-25J3.2    | K00033 |
| ENSG00000257779 | 5.13E-15 | -2.63127 | 1 | 1 RP11-848D3.4   | -      |
| ENSG00000257780 | 5.13E-15 | -2.63127 | 1 | 1 GLYCAM1        | K06815 |
| ENSG00000257781 | 5.13E-15 | -2.63127 | 1 | 1 RP11-110L15.1  | -      |
| ENSG00000257784 | 5.13E-15 | -2.63127 | 1 | 1 RP11-630C16.1  | -      |
| ENSG00000257786 | 5.13E-15 | -2.63127 | 1 | 1 RP11-272K23.4  | -      |
| ENSG00000257787 | 5.13E-15 | -2.63127 | 1 | 1 RP11-20L19.1   | -      |
| ENSG00000257792 | 5.13E-15 | -2.63127 | 1 | 1 OR5BJ1P        | K04257 |
| ENSG00000257794 | 5.13E-15 | -2.63127 | 1 | 1 RP11-125N22.4  | -      |
| ENSG00000257797 | 5.13E-15 | -2.63127 | 1 | 1 CTD-2382E5.2   | -      |
| ENSG00000257807 | 5.13E-15 | -2.63127 | 1 | 1 RP1-90J4.3     | -      |

|                 |          |          |   |                  |        |
|-----------------|----------|----------|---|------------------|--------|
| ENSG00000257808 | 5.13E-15 | -2.63127 | 1 | 1 RP11-1136G11.8 | -      |
| ENSG00000257809 | 5.13E-15 | -2.63127 | 1 | 1 RP11-603J24.14 | -      |
| ENSG00000257813 | 5.13E-15 | -2.63127 | 1 | 1 RP11-73B8.2    | -      |
| ENSG00000257820 | 5.13E-15 | -2.63127 | 1 | 1 MRPS6P4        | K02990 |
| ENSG00000257823 | 5.13E-15 | -2.63127 | 1 | 1 RP11-560G2.2   | K19482 |
| ENSG00000257824 | 5.13E-15 | -2.63127 | 1 | 1 RP11-1049A21.2 | -      |
| ENSG00000257825 | 5.13E-15 | -2.63127 | 1 | 1 RP11-536C10.5  | -      |
| ENSG00000257826 | 5.13E-15 | -2.63127 | 1 | 1 RP11-116N8.4   | -      |
| ENSG00000257835 | 5.13E-15 | -2.63127 | 1 | 1 RP1-97G4.1     | -      |
| ENSG00000257837 | 5.13E-15 | -2.63127 | 1 | 1 RP11-263K4.4   | -      |
| ENSG00000257838 | 5.13E-15 | -2.63127 | 1 | 1 RP11-368J21.3  | -      |
| ENSG00000257839 | 5.13E-15 | -2.63127 | 1 | 1 RP11-290L1.2   | -      |
| ENSG00000257842 | 5.13E-15 | -2.63127 | 1 | 1 NOVA1-AS1      | -      |
| ENSG00000257844 | 5.13E-15 | -2.63127 | 1 | 1 KRT124P        | K07605 |
| ENSG00000257845 | 5.13E-15 | -2.63127 | 1 | 1 RP11-626P14.1  | -      |
| ENSG00000257846 | 5.13E-15 | -2.63127 | 1 | 1 RP11-597A11.3  | -      |
| ENSG00000257847 | 5.13E-15 | -2.63127 | 1 | 1 LSM3P2         | K12622 |
| ENSG00000257848 | 5.13E-15 | -2.63127 | 1 | 1 RP11-474C8.5   | K10950 |
| ENSG00000257849 | 5.13E-15 | -2.63127 | 1 | 1 RP11-547C5.1   | -      |
| ENSG00000257852 | 5.13E-15 | -2.63127 | 1 | 1 RP11-843B15.1  | K05189 |
| ENSG00000257853 | 5.13E-15 | -2.63127 | 1 | 1 MED15P1        | K15157 |
| ENSG00000257855 | 5.13E-15 | -2.63127 | 1 | 1 RP11-629O19.1  | -      |
| ENSG00000257858 | 5.13E-15 | -2.63127 | 1 | 1 MTND1P24       | -      |
| ENSG00000257860 | 5.13E-15 | -2.63127 | 1 | 1 RP11-552I14.1  | -      |
| ENSG00000257863 | 5.13E-15 | -2.63127 | 1 | 1 RP11-587P21.3  | -      |
| ENSG00000257864 | 5.13E-15 | -2.63127 | 1 | 1 RP11-46I1.2    | -      |
| ENSG00000257865 | 5.13E-15 | -2.63127 | 1 | 1 RP11-154D9.1   | -      |
| ENSG00000257868 | 5.13E-15 | -2.63127 | 1 | 1 CTD-2311B13.8  | -      |
| ENSG00000257869 | 5.13E-15 | -2.63127 | 1 | 1 CTD-2591A6.2   | -      |
| ENSG00000257870 | 5.13E-15 | -2.63127 | 1 | 1 RP11-616L12.1  | -      |
| ENSG00000257872 | 5.13E-15 | -2.63127 | 1 | 1 RP11-453D16.2  | -      |
| ENSG00000257875 | 5.13E-15 | -2.63127 | 1 | 1 RP11-263K4.1   | -      |
| ENSG00000257877 | 5.13E-15 | -2.63127 | 1 | 1 RP3-462E2.3    | -      |
| ENSG00000257878 | 5.13E-15 | -2.63127 | 1 | 1 RP11-256L6.3   | -      |
| ENSG00000257879 | 5.13E-15 | -2.63127 | 1 | 1 RP11-90C1.1    | -      |
| ENSG00000257880 | 5.13E-15 | -2.63127 | 1 | 1 RP11-769N19.2  | -      |
| ENSG00000257883 | 5.13E-15 | -2.63127 | 1 | 1 RP11-497G19.1  | -      |
| ENSG00000257884 | 5.13E-15 | -2.63127 | 1 | 1 RP11-597A11.4  | K11841 |
| ENSG00000257885 | 5.13E-15 | -2.63127 | 1 | 1 RP11-474C8.4   | K17080 |
| ENSG00000257891 | 5.13E-15 | -2.63127 | 1 | 1 CTD-2311B13.1  | -      |
| ENSG00000257897 | 5.13E-15 | -2.63127 | 1 | 1 RP11-812D23.1  | -      |
| ENSG00000257899 | 5.13E-15 | -2.63127 | 1 | 1 RP11-125N22.3  | -      |
| ENSG00000257900 | 5.13E-15 | -2.63127 | 1 | 1 RP11-454K7.1   | -      |
| ENSG00000257904 | 5.13E-15 | -2.63127 | 1 | 1 RP11-269C4.2   | -      |
| ENSG00000257905 | 5.13E-15 | -2.63127 | 1 | 1 RP3-432I18.1   | K08770 |
| ENSG00000257906 | 5.13E-15 | -2.63127 | 1 | 1 RP1-90J4.1     | -      |
| ENSG00000257907 | 5.13E-15 | -2.63127 | 1 | 1 EEF1A1P17      | K03231 |
| ENSG00000257912 | 5.13E-15 | -2.63127 | 1 | 1 RP11-248E9.5   | -      |
| ENSG00000257915 | 5.13E-15 | -2.63127 | 1 | 1 GLULP5         | -      |
| ENSG00000257920 | 5.13E-15 | -2.63127 | 1 | 1 RP11-541G9.2   | -      |
| ENSG00000257925 | 5.13E-15 | -2.63127 | 1 | 1 RP11-493L12.3  | -      |
| ENSG00000257927 | 5.13E-15 | -2.63127 | 1 | 1 MRPS36P5       | K17414 |
| ENSG00000257931 | 5.13E-15 | -2.63127 | 1 | 1 CTD-2311B13.7  | -      |
| ENSG00000257932 | 5.13E-15 | -2.63127 | 1 | 1 RP11-155I9.1   | -      |
| ENSG00000257933 | 5.13E-15 | -2.63127 | 1 | 1 RP11-125N22.1  | -      |
| ENSG00000257935 | 5.13E-15 | -2.63127 | 1 | 1 RP11-82C23.2   | -      |
| ENSG00000257943 | 5.13E-15 | -2.63127 | 1 | 1 RP11-167N24.3  | -      |
| ENSG00000257948 | 5.13E-15 | -2.63127 | 1 | 1 RP11-123M21.1  | -      |

|                 |          |          |   |                  |        |
|-----------------|----------|----------|---|------------------|--------|
| ENSG00000257951 | 5.13E-15 | -2.63127 | 1 | 1 RP11-554D14.4  | --     |
| ENSG00000257955 | 5.13E-15 | -2.63127 | 1 | 1 RP1-228P16.5   | --     |
| ENSG00000257958 | 5.13E-15 | -2.63127 | 1 | 1 RP11-25E2.1    | --     |
| ENSG00000257959 | 5.13E-15 | -2.63127 | 1 | 1 RP11-536C10.4  | --     |
| ENSG00000257962 | 5.13E-15 | -2.63127 | 1 | 1 RP11-219B4.6   | --     |
| ENSG00000257964 | 5.13E-15 | -2.63127 | 1 | 1 RP11-133N21.10 | --     |
| ENSG00000257976 | 5.13E-15 | -2.63127 | 1 | 1 RP11-388G3.1   | K13506 |
| ENSG00000257977 | 5.13E-15 | -2.63127 | 1 | 1 RP11-496I2.6   | --     |
| ENSG00000257979 | 5.13E-15 | -2.63127 | 1 | 1 SNRPGP18       | K11099 |
| ENSG00000257985 | 5.13E-15 | -2.63127 | 1 | 1 RP1-228P16.4   | --     |
| ENSG00000257986 | 5.13E-15 | -2.63127 | 1 | 1 RP11-314P15.2  | --     |
| ENSG00000257987 | 5.13E-15 | -2.63127 | 1 | 1 LINC00935      | --     |
| ENSG00000257989 | 5.13E-15 | -2.63127 | 1 | 1 RP1-288H2.2    | --     |
| ENSG00000257990 | 5.13E-15 | -2.63127 | 1 | 1 NF1P4          | K08052 |
| ENSG00000257991 | 5.13E-15 | -2.63127 | 1 | 1 RP11-2H8.3     | K12193 |
| ENSG00000257994 | 5.13E-15 | -2.63127 | 1 | 1 RP11-626I20.2  | K19535 |
| ENSG00000257995 | 5.13E-15 | -2.63127 | 1 | 1 RP11-632B21.1  | --     |
| ENSG00000257997 | 5.13E-15 | -2.63127 | 1 | 1 RP11-100F15.2  | --     |
| ENSG00000257998 | 5.13E-15 | -2.63127 | 1 | 1 RP11-361A23.3  | K14535 |
| ENSG00000258001 | 5.13E-15 | -2.63127 | 1 | 1 RP11-756H6.1   | --     |
| ENSG00000258007 | 5.13E-15 | -2.63127 | 1 | 1 RP11-350G24.1  | --     |
| ENSG00000258010 | 5.13E-15 | -2.63127 | 1 | 1 RP11-210M15.1  | --     |
| ENSG00000258011 | 5.13E-15 | -2.63127 | 1 | 1 HMGA1P3        | K09282 |
| ENSG00000258012 | 5.13E-15 | -2.63127 | 1 | 1 RP11-603K19.1  | K00789 |
| ENSG00000258013 | 5.13E-15 | -2.63127 | 1 | 1 RPL3P13        | K02925 |
| ENSG00000258016 | 5.13E-15 | -2.63127 | 1 | 1 HIGD1AP1       | --     |
| ENSG00000258018 | 5.13E-15 | -2.63127 | 1 | 1 RP11-148B3.1   | --     |
| ENSG00000258021 | 5.13E-15 | -2.63127 | 1 | 1 RP11-1100L3.4  | K04437 |
| ENSG00000258024 | 5.13E-15 | -2.63127 | 1 | 1 OR5BT1P        | K04257 |
| ENSG00000258026 | 5.13E-15 | -2.63127 | 1 | 1 RP11-543H12.1  | --     |
| ENSG00000258027 | 5.13E-15 | -2.63127 | 1 | 1 RP11-597A11.1  | K08052 |
| ENSG00000258033 | 5.13E-15 | -2.63127 | 1 | 1 RP11-350G24.2  | K17920 |
| ENSG00000258035 | 5.13E-15 | -2.63127 | 1 | 1 RP11-74K11.2   | --     |
| ENSG00000258036 | 5.13E-15 | -2.63127 | 1 | 1 KRT125P        | K07605 |
| ENSG00000258039 | 5.13E-15 | -2.63127 | 1 | 1 RP11-406H4.1   | --     |
| ENSG00000258040 | 5.13E-15 | -2.63127 | 1 | 1 AC005086.3     | K07560 |
| ENSG00000258050 | 5.13E-15 | -2.63127 | 1 | 1 RP11-698F20.3  | --     |
| ENSG00000258051 | 5.13E-15 | -2.63127 | 1 | 1 RP11-474C8.3   | K07152 |
| ENSG00000258052 | 5.13E-15 | -2.63127 | 1 | 1 AC025263.3     | K16779 |
| ENSG00000258053 | 5.13E-15 | -2.63127 | 1 | 1 CTD-2021H9.3   | --     |
| ENSG00000258064 | 5.13E-15 | -2.63127 | 1 | 1 RP11-293I14.2  | --     |
| ENSG00000258066 | 5.13E-15 | -2.63127 | 1 | 1 RP11-781A6.1   | --     |
| ENSG00000258068 | 5.13E-15 | -2.63127 | 1 | 1 RP11-328C8.5   | --     |
| ENSG00000258071 | 5.13E-15 | -2.63127 | 1 | 1 ARL2BPP2       | K16742 |
| ENSG00000258072 | 5.13E-15 | -2.63127 | 1 | 1 RP11-554D14.2  | K14801 |
| ENSG00000258073 | 5.13E-15 | -2.63127 | 1 | 1 RP11-1079J22.1 | K11096 |
| ENSG00000258074 | 5.13E-15 | -2.63127 | 1 | 1 VTI1BP3        | K08493 |
| ENSG00000258076 | 5.13E-15 | -2.63127 | 1 | 1 RP11-536C10.14 | --     |
| ENSG00000258077 | 5.13E-15 | -2.63127 | 1 | 1 RP11-114H23.1  | --     |
| ENSG00000258080 | 5.13E-15 | -2.63127 | 1 | 1 ARHGAP42P4     | K15696 |
| ENSG00000258083 | 5.13E-15 | -2.63127 | 1 | 1 OR9A4          | K04257 |
| ENSG00000258084 | 5.13E-15 | -2.63127 | 1 | 1 RP11-754N21.1  | --     |
| ENSG00000258086 | 5.13E-15 | -2.63127 | 1 | 1 RP11-753H16.5  | --     |
| ENSG00000258090 | 5.13E-15 | -2.63127 | 1 | 1 RP11-734E19.1  | --     |
| ENSG00000258091 | 5.13E-15 | -2.63127 | 1 | 1 RP11-290L1.6   | --     |
| ENSG00000258093 | 5.13E-15 | -2.63127 | 1 | 1 AC005086.4     | --     |
| ENSG00000258098 | 5.13E-15 | -2.63127 | 1 | 1 RP11-89K22.1   | --     |
| ENSG00000258100 | 5.13E-15 | -2.63127 | 1 | 1 RP11-121E16.1  | --     |



|                 |          |          |   |                  |        |
|-----------------|----------|----------|---|------------------|--------|
| ENSG00000258104 | 5.13E-15 | -2.63127 | 1 | 1 HIGD1AP9       | -      |
| ENSG00000258107 | 5.13E-15 | -2.63127 | 1 | 1 RP11-260G13.1  | -      |
| ENSG00000258108 | 5.13E-15 | -2.63127 | 1 | 1 RP11-1028N23.3 | -      |
| ENSG00000258111 | 5.13E-15 | -2.63127 | 1 | 1 RP11-43D4.2    | K02128 |
| ENSG00000258112 | 5.13E-15 | -2.63127 | 1 | 1 RP11-404O18.1  | K10146 |
| ENSG00000258114 | 5.13E-15 | -2.63127 | 1 | 1 CTA-109P11.4   | -      |
| ENSG00000258115 | 5.13E-15 | -2.63127 | 1 | 1 RP11-89M22.3   | -      |
| ENSG00000258116 | 5.13E-15 | -2.63127 | 1 | 1 RP11-493L12.6  | K03767 |
| ENSG00000258117 | 5.13E-15 | -2.63127 | 1 | 1 RP11-1022B3.1  | -      |
| ENSG00000258118 | 5.13E-15 | -2.63127 | 1 | 1 RP11-77I22.4   | K03767 |
| ENSG00000258119 | 5.13E-15 | -2.63127 | 1 | 1 RP11-804F13.1  | -      |
| ENSG00000258120 | 5.13E-15 | -2.63127 | 1 | 1 KRT128P        | K07605 |
| ENSG00000258121 | 5.13E-15 | -2.63127 | 1 | 1 RP11-722P11.4  | -      |
| ENSG00000258123 | 5.13E-15 | -2.63127 | 1 | 1 RP11-314D7.2   | -      |
| ENSG00000258125 | 5.13E-15 | -2.63127 | 1 | 1 RP11-1041F24.1 | -      |
| ENSG00000258131 | 5.13E-15 | -2.63127 | 1 | 1 RP11-541G9.1   | -      |
| ENSG00000258133 | 5.13E-15 | -2.63127 | 1 | 1 RP11-340M11.1  | K07937 |
| ENSG00000258134 | 5.13E-15 | -2.63127 | 1 | 1 RP11-956A19.1  | -      |
| ENSG00000258135 | 5.13E-15 | -2.63127 | 1 | 1 RP11-70F11.11  | -      |
| ENSG00000258140 | 5.13E-15 | -2.63127 | 1 | 1 RP11-324P9.1   | -      |
| ENSG00000258142 | 5.13E-15 | -2.63127 | 1 | 1 RP11-18O15.1   | -      |
| ENSG00000258144 | 5.13E-15 | -2.63127 | 1 | 1 RP11-554L12.1  | -      |
| ENSG00000258148 | 5.13E-15 | -2.63127 | 1 | 1 AC007115.3     | -      |
| ENSG00000258150 | 5.13E-15 | -2.63127 | 1 | 1 RP11-345J4.3   | K11364 |
| ENSG00000258153 | 5.13E-15 | -2.63127 | 1 | 1 HSPE1P4        | K04078 |
| ENSG00000258154 | 5.13E-15 | -2.63127 | 1 | 1 RP11-44N21.2   | K08789 |
| ENSG00000258159 | 5.13E-15 | -2.63127 | 1 | 1 RP1-71H24.4    | K09647 |
| ENSG00000258162 | 5.13E-15 | -2.63127 | 1 | 1 RP11-315E17.1  | -      |
| ENSG00000258167 | 5.13E-15 | -2.63127 | 1 | 1 RP11-115F18.1  | -      |
| ENSG00000258169 | 5.13E-15 | -2.63127 | 1 | 1 LINC00485      | -      |
| ENSG00000258170 | 5.13E-15 | -2.63127 | 1 | 1 RP11-263K4.5   | -      |
| ENSG00000258172 | 5.13E-15 | -2.63127 | 1 | 1 RP11-1105G2.4  | -      |
| ENSG00000258173 | 5.13E-15 | -2.63127 | 1 | 1 RP11-248E9.4   | -      |
| ENSG00000258175 | 5.13E-15 | -2.63127 | 1 | 1 RP11-412H8.2   | -      |
| ENSG00000258178 | 5.13E-15 | -2.63127 | 1 | 1 RP11-18J9.3    | -      |
| ENSG00000258181 | 5.13E-15 | -2.63127 | 1 | 1 RP11-493L12.4  | -      |
| ENSG00000258183 | 5.13E-15 | -2.63127 | 1 | 1 RP11-753N8.1   | -      |
| ENSG00000258184 | 5.13E-15 | -2.63127 | 1 | 1 RP11-335M9.1   | K07877 |
| ENSG00000258185 | 5.13E-15 | -2.63127 | 1 | 1 RP11-202H2.1   | -      |
| ENSG00000258186 | 5.13E-15 | -2.63127 | 1 | 1 SLC7A5P2       | K13780 |
| ENSG00000258188 | 5.13E-15 | -2.63127 | 1 | 1 RP11-146E13.4  | -      |
| ENSG00000258193 | 5.13E-15 | -2.63127 | 1 | 1 RP11-362A1.2   | K06664 |
| ENSG00000258196 | 5.13E-15 | -2.63127 | 1 | 1 CTD-2213F21.4  | -      |
| ENSG00000258197 | 5.13E-15 | -2.63127 | 1 | 1 NKX2-2-AS1     | -      |
| ENSG00000258198 | 5.13E-15 | -2.63127 | 1 | 1 RP11-146E13.3  | K11518 |
| ENSG00000258202 | 5.13E-15 | -2.63127 | 1 | 1 RP11-776A13.2  | -      |
| ENSG00000258203 | 5.13E-15 | -2.63127 | 1 | 1 RP1-228P16.3   | -      |
| ENSG00000258206 | 5.13E-15 | -2.63127 | 1 | 1 RP13-619I2.2   | -      |
| ENSG00000258212 | 5.13E-15 | -2.63127 | 1 | 1 RP11-624G19.1  | K09229 |
| ENSG00000258214 | 5.13E-15 | -2.63127 | 1 | 1 RP11-272B17.1  | -      |
| ENSG00000258215 | 5.13E-15 | -2.63127 | 1 | 1 RP11-299A16.1  | -      |
| ENSG00000258216 | 5.13E-15 | -2.63127 | 1 | 1 RP11-654D12.2  | -      |
| ENSG00000258220 | 5.13E-15 | -2.63127 | 1 | 1 RP11-38F22.1   | -      |
| ENSG00000258223 | 5.13E-15 | -2.63127 | 1 | 1 PRSS58         | -      |
| ENSG00000258224 | 5.13E-15 | -2.63127 | 1 | 1 RP11-587P21.1  | K00121 |
| ENSG00000258225 | 5.13E-15 | -2.63127 | 1 | 1 RP11-136F16.1  | -      |
| ENSG00000258227 | 5.13E-15 | -2.63127 | 1 | 1 CLEC5A         | K10073 |
| ENSG00000258230 | 5.13E-15 | -2.63127 | 1 | 1 RP11-511H9.3   | K08239 |

|                 |          |          |   |                  |        |
|-----------------|----------|----------|---|------------------|--------|
| ENSG00000258231 | 5.13E-15 | -2.63127 | 1 | 1 RP11-362K2.2   | -      |
| ENSG00000258232 | 5.13E-15 | -2.63127 | 1 | 1 RP11-161H23.5  | -      |
| ENSG00000258233 | 5.13E-15 | -2.63127 | 1 | 1 ARHGAP42P5     | K15696 |
| ENSG00000258234 | 5.13E-15 | -2.63127 | 1 | 1 RP11-370I10.2  | -      |
| ENSG00000258235 | 5.13E-15 | -2.63127 | 1 | 1 RP11-12K6.2    | -      |
| ENSG00000258239 | 5.13E-15 | -2.63127 | 1 | 1 MTND2P17       | K14220 |
| ENSG00000258244 | 5.13E-15 | -2.63127 | 1 | 1 OSTF1P1        | -      |
| ENSG00000258245 | 5.13E-15 | -2.63127 | 1 | 1 RP11-114H23.3  | K02866 |
| ENSG00000258247 | 5.13E-15 | -2.63127 | 1 | 1 RP11-167N24.6  | -      |
| ENSG00000258249 | 5.13E-15 | -2.63127 | 1 | 1 RP11-497G19.3  | -      |
| ENSG00000258251 | 5.13E-15 | -2.63127 | 1 | 1 RP11-256L6.4   | -      |
| ENSG00000258252 | 5.13E-15 | -2.63127 | 1 | 1 CTD-2311B13.5  | -      |
| ENSG00000258253 | 5.13E-15 | -2.63127 | 1 | 1 RP3-416H24.4   | -      |
| ENSG00000258254 | 5.13E-15 | -2.63127 | 1 | 1 RP11-162N7.1   | -      |
| ENSG00000258256 | 5.13E-15 | -2.63127 | 1 | 1 RP11-219B4.5   | -      |
| ENSG00000258262 | 5.13E-15 | -2.63127 | 1 | 1 RP11-693J15.3  | K17885 |
| ENSG00000258265 | 5.13E-15 | -2.63127 | 1 | 1 CTD-2311B13.2  | -      |
| ENSG00000258268 | 5.13E-15 | -2.63127 | 1 | 1 RP11-570L15.1  | -      |
| ENSG00000258271 | 5.13E-15 | -2.63127 | 1 | 1 RP11-356O22.4  | -      |
| ENSG00000258272 | 5.13E-15 | -2.63127 | 1 | 1 RP11-510I5.4   | -      |
| ENSG00000258274 | 5.13E-15 | -2.63127 | 1 | 1 RP11-887P2.5   | -      |
| ENSG00000258275 | 5.13E-15 | -2.63127 | 1 | 1 OR7K1P         | K04257 |
| ENSG00000258276 | 5.13E-15 | -2.63127 | 1 | 1 RP11-244H18.1  | -      |
| ENSG00000258278 | 5.13E-15 | -2.63127 | 1 | 1 RP11-297L6.1   | -      |
| ENSG00000258280 | 5.13E-15 | -2.63127 | 1 | 1 RP11-1028N23.2 | -      |
| ENSG00000258282 | 5.13E-15 | -2.63127 | 1 | 1 BTF3P2         | K01527 |
| ENSG00000258283 | 5.13E-15 | -2.63127 | 1 | 1 RP11-386G11.3  | -      |
| ENSG00000258288 | 5.13E-15 | -2.63127 | 1 | 1 RP11-554E23.3  | -      |
| ENSG00000258290 | 5.13E-15 | -2.63127 | 1 | 1 RP11-654D12.1  | K11798 |
| ENSG00000258292 | 5.13E-15 | -2.63127 | 1 | 1 RP11-536G4.1   | -      |
| ENSG00000258294 | 5.13E-15 | -2.63127 | 1 | 1 RP11-314D7.1   | -      |
| ENSG00000258300 | 5.13E-15 | -2.63127 | 1 | 1 NUTF2P2        | -      |
| ENSG00000258304 | 5.13E-15 | -2.63127 | 1 | 1 RP11-453D16.1  | K11487 |
| ENSG00000258308 | 5.13E-15 | -2.63127 | 1 | 1 RP11-554E23.2  | -      |
| ENSG00000258312 | 5.13E-15 | -2.63127 | 1 | 1 RP11-690J15.1  | -      |
| ENSG00000258313 | 5.13E-15 | -2.63127 | 1 | 1 RP11-167N24.5  | -      |
| ENSG00000258314 | 5.13E-15 | -2.63127 | 1 | 1 CTD-2314B22.1  | -      |
| ENSG00000258316 | 5.13E-15 | -2.63127 | 1 | 1 KLF17P1        | K09211 |
| ENSG00000258320 | 5.13E-15 | -2.63127 | 1 | 1 RP11-274M17.1  | K13096 |
| ENSG00000258323 | 5.13E-15 | -2.63127 | 1 | 1 RP1-267L14.3   | -      |
| ENSG00000258324 | 5.13E-15 | -2.63127 | 1 | 1 RP11-536C10.22 | -      |
| ENSG00000258331 | 5.13E-15 | -2.63127 | 1 | 1 RP11-118A3.1   | -      |
| ENSG00000258332 | 5.13E-15 | -2.63127 | 1 | 1 RP11-711C17.2  | -      |
| ENSG00000258336 | 5.13E-15 | -2.63127 | 1 | 1 RP11-410B16.1  | -      |
| ENSG00000258337 | 5.13E-15 | -2.63127 | 1 | 1 RP11-115H15.2  | -      |
| ENSG00000258338 | 5.13E-15 | -2.63127 | 1 | 1 RP11-87P13.2   | -      |
| ENSG00000258342 | 5.13E-15 | -2.63127 | 1 | 1 RP11-116N8.1   | -      |
| ENSG00000258345 | 5.13E-15 | -2.63127 | 1 | 1 RP11-603J24.6  | -      |
| ENSG00000258346 | 5.13E-15 | -2.63127 | 1 | 1 RP11-148B3.2   | -      |
| ENSG00000258350 | 5.13E-15 | -2.63127 | 1 | 1 SYF2P1         | K12868 |
| ENSG00000258357 | 5.13E-15 | -2.63127 | 1 | 1 RP11-778J16.2  | K14842 |
| ENSG00000258358 | 5.13E-15 | -2.63127 | 1 | 1 RP11-228G3.1   | K14863 |
| ENSG00000258360 | 5.13E-15 | -2.63127 | 1 | 1 RP11-266O15.3  | K08052 |
| ENSG00000258363 | 5.13E-15 | -2.63127 | 1 | 1 GRAMD4P4       | -      |
| ENSG00000258364 | 5.13E-15 | -2.63127 | 1 | 1 RP11-536C10.16 | -      |
| ENSG00000258367 | 5.13E-15 | -2.63127 | 1 | 1 RP11-536C10.3  | K08955 |
| ENSG00000258368 | 5.13E-15 | -2.63127 | 1 | 1 RP11-125N22.2  | K09228 |
| ENSG00000258369 | 5.13E-15 | -2.63127 | 1 | 1 RP1-90J4.2     | -      |

|                 |          |          |   |                  |        |
|-----------------|----------|----------|---|------------------|--------|
| ENSG00000258373 | 5.13E-15 | -2.63127 | 1 | 1 SLC25A3P2      | K15102 |
| ENSG00000258375 | 5.13E-15 | -2.63127 | 1 | 1 RP11-617J18.1  | K07560 |
| ENSG00000258377 | 5.13E-15 | -2.63127 | 1 | 1 RP11-649E7.5   | -      |
| ENSG00000258378 | 5.13E-15 | -2.63127 | 1 | 1 RP11-517O13.1  | -      |
| ENSG00000258379 | 5.13E-15 | -2.63127 | 1 | 1 RP11-204N11.2  | -      |
| ENSG00000258381 | 5.13E-15 | -2.63127 | 1 | 1 RP11-737F10.1  | K09040 |
| ENSG00000258383 | 5.13E-15 | -2.63127 | 1 | 1 CTD-2200A16.1  | -      |
| ENSG00000258385 | 5.13E-15 | -2.63127 | 1 | 1 RP11-629F19.1  | -      |
| ENSG00000258386 | 5.13E-15 | -2.63127 | 1 | 1 RP11-187E13.2  | -      |
| ENSG00000258387 | 5.13E-15 | -2.63127 | 1 | 1 RP11-557C9.3   | -      |
| ENSG00000258388 | 5.13E-15 | -2.63127 | 1 | 1 PPT2-EGFL8     | K01074 |
| ENSG00000258389 | 5.13E-15 | -2.63127 | 1 | 1 DUX4           | -      |
| ENSG00000258390 | 5.13E-15 | -2.63127 | 1 | 1 RP11-1070N10.4 | -      |
| ENSG00000258392 | 5.13E-15 | -2.63127 | 1 | 1 RPA2P1         | K10739 |
| ENSG00000258393 | 5.13E-15 | -2.63127 | 1 | 1 RP11-907D1.2   | -      |
| ENSG00000258394 | 5.13E-15 | -2.63127 | 1 | 1 CTD-2307P3.1   | -      |
| ENSG00000258395 | 5.13E-15 | -2.63127 | 1 | 1 RP11-65I12.1   | -      |
| ENSG00000258397 | 5.13E-15 | -2.63127 | 1 | 1 RP11-173D3.2   | K05726 |
| ENSG00000258399 | 5.13E-15 | -2.63127 | 1 | 1 MEG8           | -      |
| ENSG00000258400 | 5.13E-15 | -2.63127 | 1 | 1 RP11-831F12.2  | -      |
| ENSG00000258401 | 5.13E-15 | -2.63127 | 1 | 1 RP11-326E7.1   | K02128 |
| ENSG00000258402 | 5.13E-15 | -2.63127 | 1 | 1 RP11-516J2.1   | -      |
| ENSG00000258403 | 5.13E-15 | -2.63127 | 1 | 1 RP11-355I22.6  | -      |
| ENSG00000258405 | 5.13E-15 | -2.63127 | 1 | 1 ZNF578         | K09228 |
| ENSG00000258406 | 5.13E-15 | -2.63127 | 1 | 1 RP11-88E18.1   | K07375 |
| ENSG00000258407 | 5.13E-15 | -2.63127 | 1 | 1 RP11-300J18.2  | -      |
| ENSG00000258408 | 5.13E-15 | -2.63127 | 1 | 1 NT5CP2         | K01068 |
| ENSG00000258410 | 5.13E-15 | -2.63127 | 1 | 1 RP11-173D3.1   | -      |
| ENSG00000258411 | 5.13E-15 | -2.63127 | 1 | 1 RP11-804M7.2   | K07836 |
| ENSG00000258412 | 5.13E-15 | -2.63127 | 1 | 1 RP11-404P21.5  | -      |
| ENSG00000258413 | 5.13E-15 | -2.63127 | 1 | 1 RP11-665C16.6  | -      |
| ENSG00000258415 | 5.13E-15 | -2.63127 | 1 | 1 RP11-32B5.4    | -      |
| ENSG00000258416 | 5.13E-15 | -2.63127 | 1 | 1 RP11-526N18.1  | -      |
| ENSG00000258417 | 5.13E-15 | -2.63127 | 1 | 1 OC90           | -      |
| ENSG00000258418 | 5.13E-15 | -2.63127 | 1 | 1 RP11-662J14.1  | -      |
| ENSG00000258419 | 5.13E-15 | -2.63127 | 1 | 1 RP11-588P7.1   | -      |
| ENSG00000258420 | 5.13E-15 | -2.63127 | 1 | 1 RP11-403B2.3   | -      |
| ENSG00000258421 | 5.13E-15 | -2.63127 | 1 | 1 FRDAP          | K19054 |
| ENSG00000258422 | 5.13E-15 | -2.63127 | 1 | 1 RP11-486O13.2  | -      |
| ENSG00000258423 | 5.13E-15 | -2.63127 | 1 | 1 OR7E105P       | K04257 |
| ENSG00000258426 | 5.13E-15 | -2.63127 | 1 | 1 RP11-452D21.1  | -      |
| ENSG00000258430 | 5.13E-15 | -2.63127 | 1 | 1 RP11-982M15.2  | -      |
| ENSG00000258431 | 5.13E-15 | -2.63127 | 1 | 1 RP1-292L20.2   | -      |
| ENSG00000258433 | 5.13E-15 | -2.63127 | 1 | 1 RP11-255M2.1   | -      |
| ENSG00000258434 | 5.13E-15 | -2.63127 | 1 | 1 DUX4L11        | -      |
| ENSG00000258435 | 5.13E-15 | -2.63127 | 1 | 1 RP11-711D18.2  | -      |
| ENSG00000258436 | 5.13E-15 | -2.63127 | 1 | 1 RNASE12        | K16633 |
| ENSG00000258437 | 5.13E-15 | -2.63127 | 1 | 1 RP11-661G16.1  | -      |
| ENSG00000258438 | 5.13E-15 | -2.63127 | 1 | 1 OR11K2P        | K04257 |
| ENSG00000258440 | 5.13E-15 | -2.63127 | 1 | 1 RP11-1033H12.3 | K06482 |
| ENSG00000258442 | 5.13E-15 | -2.63127 | 1 | 1 RP11-474N8.5   | -      |
| ENSG00000258444 | 5.13E-15 | -2.63127 | 1 | 1 CTD-2201G16.1  | -      |
| ENSG00000258445 | 5.13E-15 | -2.63127 | 1 | 1 RP11-307P22.1  | K02537 |
| ENSG00000258448 | 5.13E-15 | -2.63127 | 1 | 1 RP11-109N23.5  | -      |
| ENSG00000258449 | 5.13E-15 | -2.63127 | 1 | 1 RP11-713N11.4  | -      |
| ENSG00000258450 | 5.13E-15 | -2.63127 | 1 | 1 RP11-649E7.7   | -      |
| ENSG00000258451 | 5.13E-15 | -2.63127 | 1 | 1 RP11-903H12.3  | -      |
| ENSG00000258453 | 5.13E-15 | -2.63127 | 1 | 1 OR11H2         | K04257 |

|                 |          |          |   |                  |        |
|-----------------|----------|----------|---|------------------|--------|
| ENSG00000258454 | 5.13E-15 | -2.63127 | 1 | 1 RP11-361H10.3  | -      |
| ENSG00000258455 | 5.13E-15 | -2.63127 | 1 | 1 RP11-665C16.5  | -      |
| ENSG00000258456 | 5.13E-15 | -2.63127 | 1 | 1 PTC2P1         | K17711 |
| ENSG00000258459 | 5.13E-15 | -2.63127 | 1 | 1 CTD-2292M16.7  | -      |
| ENSG00000258460 | 5.13E-15 | -2.63127 | 1 | 1 RP11-168L7.1   | -      |
| ENSG00000258463 | 5.13E-15 | -2.63127 | 1 | 1 RP11-173D3.3   | K14958 |
| ENSG00000258464 | 5.13E-15 | -2.63127 | 1 | 1 RP11-388E23.2  | -      |
| ENSG00000258465 | 5.13E-15 | -2.63127 | 1 | 1 DCAF8          | K11804 |
| ENSG00000258467 | 5.13E-15 | -2.63127 | 1 | 1 PHKBP2         | K07190 |
| ENSG00000258468 | 5.13E-15 | -2.63127 | 1 | 1 OR11G1P        | K04257 |
| ENSG00000258473 | 5.13E-15 | -2.63127 | 1 | 1 RP11-7F17.4    | -      |
| ENSG00000258474 | 5.13E-15 | -2.63127 | 1 | 1 RP11-187E13.1  | -      |
| ENSG00000258475 | 5.13E-15 | -2.63127 | 1 | 1 U85056.3       | -      |
| ENSG00000258476 | 5.13E-15 | -2.63127 | 1 | 1 RP11-76E17.3   | -      |
| ENSG00000258477 | 5.13E-15 | -2.63127 | 1 | 1 PPIAP6         | K03767 |
| ENSG00000258478 | 5.13E-15 | -2.63127 | 1 | 1 RP11-232C2.1   | -      |
| ENSG00000258479 | 5.13E-15 | -2.63127 | 1 | 1 LINC00640      | -      |
| ENSG00000258480 | 5.13E-15 | -2.63127 | 1 | 1 RP11-662J14.2  | -      |
| ENSG00000258481 | 5.13E-15 | -2.63127 | 1 | 1 RP11-472N19.3  | -      |
| ENSG00000258482 | 5.13E-15 | -2.63127 | 1 | 1 TRAV15         | -      |
| ENSG00000258483 | 5.13E-15 | -2.63127 | 1 | 1 AC144835.1     | -      |
| ENSG00000258484 | 5.13E-15 | -2.63127 | 1 | 1 SPESP1         | -      |
| ENSG00000258487 | 5.13E-15 | -2.63127 | 1 | 1 RP11-99L13.1   | -      |
| ENSG00000258489 | 5.13E-15 | -2.63127 | 1 | 1 RP11-398J10.2  | -      |
| ENSG00000258490 | 5.13E-15 | -2.63127 | 1 | 1 RP11-862P13.1  | -      |
| ENSG00000258491 | 5.13E-15 | -2.63127 | 1 | 1 ZFP64P1        | -      |
| ENSG00000258493 | 5.13E-15 | -2.63127 | 1 | 1 RP11-73E17.3   | K12160 |
| ENSG00000258494 | 5.13E-15 | -2.63127 | 1 | 1 OR11J5P        | K04257 |
| ENSG00000258496 | 5.13E-15 | -2.63127 | 1 | 1 RP11-1141N12.1 | -      |
| ENSG00000258497 | 5.13E-15 | -2.63127 | 1 | 1 CTD-2561F5.1   | -      |
| ENSG00000258499 | 5.13E-15 | -2.63127 | 1 | 1 RP11-862G15.2  | -      |
| ENSG00000258500 | 5.13E-15 | -2.63127 | 1 | 1 CTD-2062F14.2  | K11299 |
| ENSG00000258501 | 5.13E-15 | -2.63127 | 1 | 1 EIF3LP1        | K15029 |
| ENSG00000258502 | 5.13E-15 | -2.63127 | 1 | 1 RP11-783L4.1   | -      |
| ENSG00000258503 | 5.13E-15 | -2.63127 | 1 | 1 RP11-368P15.1  | K03959 |
| ENSG00000258504 | 5.13E-15 | -2.63127 | 1 | 1 RP11-638I2.6   | -      |
| ENSG00000258505 | 5.13E-15 | -2.63127 | 1 | 1 RP11-90P16.1   | -      |
| ENSG00000258506 | 5.13E-15 | -2.63127 | 1 | 1 RP11-688D15.1  | K02872 |
| ENSG00000258507 | 5.13E-15 | -2.63127 | 1 | 1 RP13-582L3.4   | -      |
| ENSG00000258509 | 5.13E-15 | -2.63127 | 1 | 1 RP11-857B24.3  | K11792 |
| ENSG00000258510 | 5.13E-15 | -2.63127 | 1 | 1 RP11-493G17.4  | K05681 |
| ENSG00000258511 | 5.13E-15 | -2.63127 | 1 | 1 RP11-61O1.2    | -      |
| ENSG00000258513 | 5.13E-15 | -2.63127 | 1 | 1 RP5-892G5.2    | K12160 |
| ENSG00000258514 | 5.13E-15 | -2.63127 | 1 | 1 DUX4L14        | -      |
| ENSG00000258516 | 5.13E-15 | -2.63127 | 1 | 1 RP11-185P18.2  | -      |
| ENSG00000258517 | 5.13E-15 | -2.63127 | 1 | 1 RP6-91H8.1     | -      |
| ENSG00000258519 | 5.13E-15 | -2.63127 | 1 | 1 RP11-349A22.3  | -      |
| ENSG00000258520 | 5.13E-15 | -2.63127 | 1 | 1 RP11-363J20.2  | -      |
| ENSG00000258524 | 5.13E-15 | -2.63127 | 1 | 1 NT5CP1         | K01068 |
| ENSG00000258525 | 5.13E-15 | -2.63127 | 1 | 1 RP11-829H16.3  | -      |
| ENSG00000258529 | 5.13E-15 | -2.63127 | 1 | 1 ALG9           | K03846 |
| ENSG00000258531 | 5.13E-15 | -2.63127 | 1 | 1 BANF1P1        | -      |
| ENSG00000258532 | 5.13E-15 | -2.63127 | 1 | 1 RP11-353P15.1  | -      |
| ENSG00000258534 | 5.13E-15 | -2.63127 | 1 | 1 CTD-2134A5.4   | -      |
| ENSG00000258535 | 5.13E-15 | -2.63127 | 1 | 1 RP11-280K24.4  | -      |
| ENSG00000258536 | 5.13E-15 | -2.63127 | 1 | 1 RP11-1053O12.1 | -      |
| ENSG00000258537 | 5.13E-15 | -2.63127 | 1 | 1 FRMD6-AS2      | -      |
| ENSG00000258538 | 5.13E-15 | -2.63127 | 1 | 1 RP11-753D20.3  | -      |

|                 |          |          |   |                  |        |
|-----------------|----------|----------|---|------------------|--------|
| ENSG00000258540 | 5.13E-15 | -2.63127 | 1 | 1 RP11-692C24.3  | K05765 |
| ENSG00000258541 | 5.13E-15 | -2.63127 | 1 | 1 OR4K4P         | K04257 |
| ENSG00000258542 | 5.13E-15 | -2.63127 | 1 | 1 AC068831.11    | -      |
| ENSG00000258544 | 5.13E-15 | -2.63127 | 1 | 1 RP11-750I4.2   | K03676 |
| ENSG00000258545 | 5.13E-15 | -2.63127 | 1 | 1 RP4-755D9.1    | -      |
| ENSG00000258546 | 5.13E-15 | -2.63127 | 1 | 1 RP11-713N11.3  | K11513 |
| ENSG00000258548 | 5.13E-15 | -2.63127 | 1 | 1 LINC00645      | -      |
| ENSG00000258549 | 5.13E-15 | -2.63127 | 1 | 1 RP11-22K10.1   | K09228 |
| ENSG00000258550 | 5.13E-15 | -2.63127 | 1 | 1 OR7E106P       | K04257 |
| ENSG00000258551 | 5.13E-15 | -2.63127 | 1 | 1 RP11-661P17.1  | -      |
| ENSG00000258552 | 5.13E-15 | -2.63127 | 1 | 1 RP11-463C8.5   | -      |
| ENSG00000258554 | 5.13E-15 | -2.63127 | 1 | 1 RP11-973D8.4   | -      |
| ENSG00000258555 | 5.13E-15 | -2.63127 | 1 | 1 SPECC1L-ADORA2 | K04266 |
| ENSG00000258556 | 5.13E-15 | -2.63127 | 1 | 1 CTD-2568P8.1   | -      |
| ENSG00000258557 | 5.13E-15 | -2.63127 | 1 | 1 AE000659.41    | -      |
| ENSG00000258558 | 5.13E-15 | -2.63127 | 1 | 1 RP11-159L20.2  | -      |
| ENSG00000258560 | 5.13E-15 | -2.63127 | 1 | 1 CTD-2376I20.1  | -      |
| ENSG00000258561 | 5.13E-15 | -2.63127 | 1 | 1 RP11-72M17.1   | -      |
| ENSG00000258562 | 5.13E-15 | -2.63127 | 1 | 1 CTD-2313J17.3  | -      |
| ENSG00000258563 | 5.13E-15 | -2.63127 | 1 | 1 PSMA3P         | K02727 |
| ENSG00000258564 | 5.13E-15 | -2.63127 | 1 | 1 OR4N1P         | K04257 |
| ENSG00000258565 | 5.13E-15 | -2.63127 | 1 | 1 BLZF2P         | -      |
| ENSG00000258566 | 5.13E-15 | -2.63127 | 1 | 1 RP11-99E15.3   | -      |
| ENSG00000258567 | 5.13E-15 | -2.63127 | 1 | 1 DUX4L16        | -      |
| ENSG00000258569 | 5.13E-15 | -2.63127 | 1 | 1 RP11-99E15.2   | -      |
| ENSG00000258570 | 5.13E-15 | -2.63127 | 1 | 1 RP11-452K20.1  | K11253 |
| ENSG00000258573 | 5.13E-15 | -2.63127 | 1 | 1 RP11-14J7.6    | -      |
| ENSG00000258576 | 5.13E-15 | -2.63127 | 1 | 1 CTD-2644I21.1  | -      |
| ENSG00000258577 | 5.13E-15 | -2.63127 | 1 | 1 SNRPGP1        | K11099 |
| ENSG00000258578 | 5.13E-15 | -2.63127 | 1 | 1 RP11-98L12.2   | K04552 |
| ENSG00000258580 | 5.13E-15 | -2.63127 | 1 | 1 RP11-320M16.2  | -      |
| ENSG00000258582 | 5.13E-15 | -2.63127 | 1 | 1 RP11-44L9.1    | -      |
| ENSG00000258584 | 5.13E-15 | -2.63127 | 1 | 1 FAM181A-AS1    | -      |
| ENSG00000258585 | 5.13E-15 | -2.63127 | 1 | 1 RP11-928F19.2  | K09228 |
| ENSG00000258587 | 5.13E-15 | -2.63127 | 1 | 1 RP11-316E14.2  | -      |
| ENSG00000258588 | 5.13E-15 | -2.63127 | 1 | 1 TRIM6-TRIM34   | K11999 |
| ENSG00000258590 | 5.13E-15 | -2.63127 | 1 | 1 NBEAP1         | -      |
| ENSG00000258592 | 5.13E-15 | -2.63127 | 1 | 1 RP11-108M12.3  | -      |
| ENSG00000258594 | 5.13E-15 | -2.63127 | 1 | 1 RP11-30G8.2    | -      |
| ENSG00000258595 | 5.13E-15 | -2.63127 | 1 | 1 RP11-371E8.2   | -      |
| ENSG00000258597 | 5.13E-15 | -2.63127 | 1 | 1 SERPINA2P      | K04525 |
| ENSG00000258598 | 5.13E-15 | -2.63127 | 1 | 1 RP11-260M19.1  | -      |
| ENSG00000258600 | 5.13E-15 | -2.63127 | 1 | 1 RP11-452D21.2  | -      |
| ENSG00000258602 | 5.13E-15 | -2.63127 | 1 | 1 RP11-7F17.7    | -      |
| ENSG00000258603 | 5.13E-15 | -2.63127 | 1 | 1 RP3-414A15.10  | -      |
| ENSG00000258604 | 5.13E-15 | -2.63127 | 1 | 1 AL161668.5     | -      |
| ENSG00000258605 | 5.13E-15 | -2.63127 | 1 | 1 RP11-299L17.4  | K10418 |
| ENSG00000258609 | 5.13E-15 | -2.63127 | 1 | 1 LINC-ROR       | -      |
| ENSG00000258610 | 5.13E-15 | -2.63127 | 1 | 1 RP11-488C13.7  | -      |
| ENSG00000258612 | 5.13E-15 | -2.63127 | 1 | 1 RP11-671J11.6  | -      |
| ENSG00000258613 | 5.13E-15 | -2.63127 | 1 | 1 RPL21P7        | K02889 |
| ENSG00000258616 | 5.13E-15 | -2.63127 | 1 | 1 RP11-369C8.1   | -      |
| ENSG00000258617 | 5.13E-15 | -2.63127 | 1 | 1 DUX4L13        | -      |
| ENSG00000258618 | 5.13E-15 | -2.63127 | 1 | 1 RPL21P9        | K02889 |
| ENSG00000258619 | 5.13E-15 | -2.63127 | 1 | 1 RP11-134E15.1  | -      |
| ENSG00000258622 | 5.13E-15 | -2.63127 | 1 | 1 RP11-90P16.2   | -      |
| ENSG00000258624 | 5.13E-15 | -2.63127 | 1 | 1 AC145436.1     | K16643 |
| ENSG00000258625 | 5.13E-15 | -2.63127 | 1 | 1 OR11H5P        | K04257 |

|                 |          |          |   |                  |        |
|-----------------|----------|----------|---|------------------|--------|
| ENSG00000258626 | 5.13E-15 | -2.63127 | 1 | 1 COX7A2P1       | K02270 |
| ENSG00000258627 | 5.13E-15 | -2.63127 | 1 | 1 RP11-76E17.1   | K02924 |
| ENSG00000258629 | 5.13E-15 | -2.63127 | 1 | 1 CTD-2014B16.1  | K09289 |
| ENSG00000258630 | 5.13E-15 | -2.63127 | 1 | 1 RP11-725G5.2   | -      |
| ENSG00000258631 | 5.13E-15 | -2.63127 | 1 | 1 RP11-739G5.1   | -      |
| ENSG00000258633 | 5.13E-15 | -2.63127 | 1 | 1 RP11-857B24.1  | -      |
| ENSG00000258636 | 5.13E-15 | -2.63127 | 1 | 1 CTD-2298J14.2  | -      |
| ENSG00000258637 | 5.13E-15 | -2.63127 | 1 | 1 RP11-242P2.1   | -      |
| ENSG00000258638 | 5.13E-15 | -2.63127 | 1 | 1 RP11-395B20.2  | K18041 |
| ENSG00000258639 | 5.13E-15 | -2.63127 | 1 | 1 RP11-10A2.1    | K11863 |
| ENSG00000258640 | 5.13E-15 | -2.63127 | 1 | 1 RPL21P5        | K02889 |
| ENSG00000258641 | 5.13E-15 | -2.63127 | 1 | 1 OR4T1P         | K04257 |
| ENSG00000258642 | 5.13E-15 | -2.63127 | 1 | 1 RP11-219E7.2   | -      |
| ENSG00000258644 | 5.13E-15 | -2.63127 | 1 | 1 SYNJ2BP-COX16  | -      |
| ENSG00000258647 | 5.13E-15 | -2.63127 | 1 | 1 LINC00930      | -      |
| ENSG00000258648 | 5.13E-15 | -2.63127 | 1 | 1 UBE2CP1        | K06688 |
| ENSG00000258649 | 5.13E-15 | -2.63127 | 1 | 1 CTD-2142D14.1  | -      |
| ENSG00000258650 | 5.13E-15 | -2.63127 | 1 | 1 HSBP1P1        | K19765 |
| ENSG00000258651 | 5.13E-15 | -2.63127 | 1 | 1 RP11-545M17.1  | -      |
| ENSG00000258652 | 5.13E-15 | -2.63127 | 1 | 1 OR4Q1P         | K04257 |
| ENSG00000258653 | 5.13E-15 | -2.63127 | 1 | 1 RP5-1021I20.4  | K13949 |
| ENSG00000258656 | 5.13E-15 | -2.63127 | 1 | 1 RP11-193F5.4   | K11300 |
| ENSG00000258657 | 5.13E-15 | -2.63127 | 1 | 1 RP11-104E19.1  | -      |
| ENSG00000258660 | 5.13E-15 | -2.63127 | 1 | 1 RP4-693M11.3   | -      |
| ENSG00000258661 | 5.13E-15 | -2.63127 | 1 | 1 RP11-964E11.2  | -      |
| ENSG00000258662 | 5.13E-15 | -2.63127 | 1 | 1 RP11-588P7.2   | -      |
| ENSG00000258663 | 5.13E-15 | -2.63127 | 1 | 1 RP11-123M6.2   | -      |
| ENSG00000258664 | 5.13E-15 | -2.63127 | 1 | 1 IFRG15         | K11794 |
| ENSG00000258665 | 5.13E-15 | -2.63127 | 1 | 1 AC068831.12    | -      |
| ENSG00000258666 | 5.13E-15 | -2.63127 | 1 | 1 RP11-638I2.8   | -      |
| ENSG00000258668 | 5.13E-15 | -2.63127 | 1 | 1 COX6CP11       | K02268 |
| ENSG00000258670 | 5.13E-15 | -2.63127 | 1 | 1 RP11-1042B17.3 | -      |
| ENSG00000258671 | 5.13E-15 | -2.63127 | 1 | 1 RP11-407N17.2  | -      |
| ENSG00000258672 | 5.13E-15 | -2.63127 | 1 | 1 RP11-543C4.3   | -      |
| ENSG00000258674 | 5.13E-15 | -2.63127 | 1 | 1 CTC-260F20.3   | K11353 |
| ENSG00000258676 | 5.13E-15 | -2.63127 | 1 | 1 RP11-386M24.3  | -      |
| ENSG00000258677 | 5.13E-15 | -2.63127 | 1 | 1 RP11-463D19.2  | K10688 |
| ENSG00000258678 | 5.13E-15 | -2.63127 | 1 | 1 RP11-1078H9.1  | -      |
| ENSG00000258680 | 5.13E-15 | -2.63127 | 1 | 1 RP11-506K19.1  | -      |
| ENSG00000258681 | 5.13E-15 | -2.63127 | 1 | 1 RP11-8L8.1     | -      |
| ENSG00000258683 | 5.13E-15 | -2.63127 | 1 | 1 RP11-11K13.1   | -      |
| ENSG00000258685 | 5.13E-15 | -2.63127 | 1 | 1 CTD-2315A10.2  | K00011 |
| ENSG00000258687 | 5.13E-15 | -2.63127 | 1 | 1 RP11-218E20.2  | -      |
| ENSG00000258690 | 5.13E-15 | -2.63127 | 1 | 1 RP11-81F13.1   | -      |
| ENSG00000258691 | 5.13E-15 | -2.63127 | 1 | 1 RP11-404P21.8  | K03915 |
| ENSG00000258692 | 5.13E-15 | -2.63127 | 1 | 1 SALL4P7        | -      |
| ENSG00000258693 | 5.13E-15 | -2.63127 | 1 | 1 RP11-436M15.3  | -      |
| ENSG00000258694 | 5.13E-15 | -2.63127 | 1 | 1 RP11-1033H12.1 | -      |
| ENSG00000258696 | 5.13E-15 | -2.63127 | 1 | 1 CTD-2058B24.3  | -      |
| ENSG00000258697 | 5.13E-15 | -2.63127 | 1 | 1 DUX4L6         | -      |
| ENSG00000258698 | 5.13E-15 | -2.63127 | 1 | 1 RP11-589M4.3   | -      |
| ENSG00000258699 | 5.13E-15 | -2.63127 | 1 | 1 RP11-356K23.2  | -      |
| ENSG00000258700 | 5.13E-15 | -2.63127 | 1 | 1 LINC00871      | -      |
| ENSG00000258702 | 5.13E-15 | -2.63127 | 1 | 1 RP11-433J8.1   | -      |
| ENSG00000258703 | 5.13E-15 | -2.63127 | 1 | 1 RP11-1085N6.4  | -      |
| ENSG00000258705 | 5.13E-15 | -2.63127 | 1 | 1 AE000660.4     | -      |
| ENSG00000258706 | 5.13E-15 | -2.63127 | 1 | 1 SLC20A1P3      | -      |
| ENSG00000258707 | 5.13E-15 | -2.63127 | 1 | 1 RP11-467L19.11 | -      |

|                 |          |          |   |                  |        |
|-----------------|----------|----------|---|------------------|--------|
| ENSG00000258710 | 5.13E-15 | -2.63127 | 1 | 1 CT60           | -      |
| ENSG00000258712 | 5.13E-15 | -2.63127 | 1 | 1 CXADRP2        | K06788 |
| ENSG00000258714 | 5.13E-15 | -2.63127 | 1 | 1 RP11-998D10.7  | -      |
| ENSG00000258716 | 5.13E-15 | -2.63127 | 1 | 1 RP11-661G16.2  | -      |
| ENSG00000258718 | 5.13E-15 | -2.63127 | 1 | 1 RP11-226P1.2   | -      |
| ENSG00000258719 | 5.13E-15 | -2.63127 | 1 | 1 RP11-232C2.3   | -      |
| ENSG00000258721 | 5.13E-15 | -2.63127 | 1 | 1 OR11H3P        | K04257 |
| ENSG00000258722 | 5.13E-15 | -2.63127 | 1 | 1 RP11-998D10.5  | K16769 |
| ENSG00000258723 | 5.13E-15 | -2.63127 | 1 | 1 RP11-332E19.2  | -      |
| ENSG00000258724 | 5.13E-15 | -2.63127 | 1 | 1 SOX7           | K09270 |
| ENSG00000258726 | 5.13E-15 | -2.63127 | 1 | 1 DUXAP6         | -      |
| ENSG00000258728 | 5.13E-15 | -2.63127 | 1 | 1 GALT           | K05056 |
| ENSG00000258729 | 5.13E-15 | -2.63127 | 1 | 1 DKFZP434O1614  | -      |
| ENSG00000258730 | 5.13E-15 | -2.63127 | 1 | 1 ITPK1-AS1      | -      |
| ENSG00000258731 | 5.13E-15 | -2.63127 | 1 | 1 RP11-547D23.1  | -      |
| ENSG00000258732 | 5.13E-15 | -2.63127 | 1 | 1 RP11-603B24.1  | K05628 |
| ENSG00000258734 | 5.13E-15 | -2.63127 | 1 | 1 RP11-112J1.3   | -      |
| ENSG00000258735 | 5.13E-15 | -2.63127 | 1 | 1 LINC00637      | -      |
| ENSG00000258736 | 5.13E-15 | -2.63127 | 1 | 1 RP11-982M15.7  | -      |
| ENSG00000258737 | 5.13E-15 | -2.63127 | 1 | 1 SUB1P2         | -      |
| ENSG00000258739 | 5.13E-15 | -2.63127 | 1 | 1 ENO1P2         | -      |
| ENSG00000258740 | 5.13E-15 | -2.63127 | 1 | 1 RP11-293M10.1  | -      |
| ENSG00000258742 | 5.13E-15 | -2.63127 | 1 | 1 RP11-862G15.1  | -      |
| ENSG00000258743 | 5.13E-15 | -2.63127 | 1 | 1 RP11-406A9.2   | -      |
| ENSG00000258744 | 5.13E-15 | -2.63127 | 1 | 1 RP11-80A15.1   | K01329 |
| ENSG00000258746 | 5.13E-15 | -2.63127 | 1 | 1 RP11-454K7.2   | K16733 |
| ENSG00000258747 | 5.13E-15 | -2.63127 | 1 | 1 RP11-163M18.1  | -      |
| ENSG00000258749 | 5.13E-15 | -2.63127 | 1 | 1 RP11-688G15.3  | -      |
| ENSG00000258750 | 5.13E-15 | -2.63127 | 1 | 1 RP11-2G1.2     | -      |
| ENSG00000258751 | 5.13E-15 | -2.63127 | 1 | 1 RP11-2G1.1     | -      |
| ENSG00000258752 | 5.13E-15 | -2.63127 | 1 | 1 RP11-356K23.1  | -      |
| ENSG00000258753 | 5.13E-15 | -2.63127 | 1 | 1 RP11-794A8.1   | -      |
| ENSG00000258754 | 5.13E-15 | -2.63127 | 1 | 1 CTD-3049M7.1   | -      |
| ENSG00000258755 | 5.13E-15 | -2.63127 | 1 | 1 DUX4L7         | -      |
| ENSG00000258757 | 5.13E-15 | -2.63127 | 1 | 1 RP11-841O20.2  | -      |
| ENSG00000258758 | 5.13E-15 | -2.63127 | 1 | 1 RP11-613G13.1  | K12597 |
| ENSG00000258761 | 5.13E-15 | -2.63127 | 1 | 1 RP11-24J19.1   | -      |
| ENSG00000258762 | 5.13E-15 | -2.63127 | 1 | 1 CTD-2320B12.3  | -      |
| ENSG00000258763 | 5.13E-15 | -2.63127 | 1 | 1 RP11-110A12.2  | -      |
| ENSG00000258764 | 5.13E-15 | -2.63127 | 1 | 1 RP11-1042B17.4 | -      |
| ENSG00000258765 | 5.13E-15 | -2.63127 | 1 | 1 RP11-692C24.2  | -      |
| ENSG00000258766 | 5.13E-15 | -2.63127 | 1 | 1 DIO2-AS1       | -      |
| ENSG00000258767 | 5.13E-15 | -2.63127 | 1 | 1 RP11-32B5.5    | -      |
| ENSG00000258769 | 5.13E-15 | -2.63127 | 1 | 1 RAP1AP         | K04353 |
| ENSG00000258770 | 5.13E-15 | -2.63127 | 1 | 1 CTD-2007A10.1  | -      |
| ENSG00000258771 | 5.13E-15 | -2.63127 | 1 | 1 RP11-854K16.2  | K05726 |
| ENSG00000258772 | 5.13E-15 | -2.63127 | 1 | 1 RP11-84C10.3   | -      |
| ENSG00000258773 | 5.13E-15 | -2.63127 | 1 | 1 RP11-255M2.2   | -      |
| ENSG00000258774 | 5.13E-15 | -2.63127 | 1 | 1 NANOGP7        | K10164 |
| ENSG00000258776 | 5.13E-15 | -2.63127 | 1 | 1 RP11-1085N6.5  | -      |
| ENSG00000258778 | 5.13E-15 | -2.63127 | 1 | 1 RP11-804M7.1   | K03238 |
| ENSG00000258779 | 5.13E-15 | -2.63127 | 1 | 1 RP11-140I24.1  | -      |
| ENSG00000258780 | 5.13E-15 | -2.63127 | 1 | 1 BMS1P15        | K14569 |
| ENSG00000258781 | 5.13E-15 | -2.63127 | 1 | 1 RP11-496I2.4   | -      |
| ENSG00000258782 | 5.13E-15 | -2.63127 | 1 | 1 RP11-701B16.2  | -      |
| ENSG00000258783 | 5.13E-15 | -2.63127 | 1 | 1 KRT18P6        | K07604 |
| ENSG00000258784 | 5.13E-15 | -2.63127 | 1 | 1 RP11-813I20.2  | -      |
| ENSG00000258785 | 5.13E-15 | -2.63127 | 1 | 1 CTD-2643K12.2  | -      |

|                 |          |          |   |                  |        |
|-----------------|----------|----------|---|------------------|--------|
| ENSG00000258786 | 5.13E-15 | -2.63127 | 1 | 1 RP11-928F19.3  | K04257 |
| ENSG00000258787 | 5.13E-15 | -2.63127 | 1 | 1 RP11-164C12.1  | K01008 |
| ENSG00000258788 | 5.13E-15 | -2.63127 | 1 | 1 RP11-404P21.9  | K02219 |
| ENSG00000258792 | 5.13E-15 | -2.63127 | 1 | 1 RP11-944C7.1   | K16467 |
| ENSG00000258793 | 5.13E-15 | -2.63127 | 1 | 1 RP11-404P21.3  | -      |
| ENSG00000258794 | 5.13E-15 | -2.63127 | 1 | 1 RP11-313F23.5  | -      |
| ENSG00000258795 | 5.13E-15 | -2.63127 | 1 | 1 RP11-1082A3.1  | -      |
| ENSG00000258796 | 5.13E-15 | -2.63127 | 1 | 1 CTD-2560C21.1  | K02896 |
| ENSG00000258797 | 5.13E-15 | -2.63127 | 1 | 1 RP11-467L19.6  | K14559 |
| ENSG00000258798 | 5.13E-15 | -2.63127 | 1 | 1 RP11-895M11.3  | -      |
| ENSG00000258799 | 5.13E-15 | -2.63127 | 1 | 1 RP11-810K23.5  | K09228 |
| ENSG00000258800 | 5.13E-15 | -2.63127 | 1 | 1 CTD-2302E22.2  | -      |
| ENSG00000258803 | 5.13E-15 | -2.63127 | 1 | 1 RP11-624J12.1  | -      |
| ENSG00000258804 | 5.13E-15 | -2.63127 | 1 | 1 RP11-322L20.1  | K04613 |
| ENSG00000258805 | 5.13E-15 | -2.63127 | 1 | 1 ADIPOR1P2      | K07297 |
| ENSG00000258806 | 5.13E-15 | -2.63127 | 1 | 1 OR11H7         | K04257 |
| ENSG00000258807 | 5.13E-15 | -2.63127 | 1 | 1 RP11-1152H15.1 | -      |
| ENSG00000258808 | 5.13E-15 | -2.63127 | 1 | 1 RP11-255G12.3  | -      |
| ENSG00000258810 | 5.13E-15 | -2.63127 | 1 | 1 RP11-219E7.1   | -      |
| ENSG00000258812 | 5.13E-15 | -2.63127 | 1 | 1 TRAV33         | -      |
| ENSG00000258814 | 5.13E-15 | -2.63127 | 1 | 1 CTD-2128A3.3   | -      |
| ENSG00000258816 | 5.13E-15 | -2.63127 | 1 | 1 RP11-74M13.3   | -      |
| ENSG00000258817 | 5.13E-15 | -2.63127 | 1 | 1 OR4C13         | K04257 |
| ENSG00000258820 | 5.13E-15 | -2.63127 | 1 | 1 RP11-293M10.2  | -      |
| ENSG00000258822 | 5.13E-15 | -2.63127 | 1 | 1 OR4K16P        | K04257 |
| ENSG00000258825 | 5.13E-15 | -2.63127 | 1 | 1 AL133168.3     | -      |
| ENSG00000258826 | 5.13E-15 | -2.63127 | 1 | 1 RP11-300J18.1  | -      |
| ENSG00000258827 | 5.13E-15 | -2.63127 | 1 | 1 RP11-537P22.2  | -      |
| ENSG00000258828 | 5.13E-15 | -2.63127 | 1 | 1 KRT8P2         | K07605 |
| ENSG00000258829 | 5.13E-15 | -2.63127 | 1 | 1 CTD-2243E23.1  | -      |
| ENSG00000258830 | 5.13E-15 | -2.63127 | 1 | 1 RP11-123K3.4   | -      |
| ENSG00000258831 | 5.13E-15 | -2.63127 | 1 | 1 RP11-76E17.4   | -      |
| ENSG00000258834 | 5.13E-15 | -2.63127 | 1 | 1 DUX4L4         | -      |
| ENSG00000258835 | 5.13E-15 | -2.63127 | 1 | 1 TRAV28         | -      |
| ENSG00000258836 | 5.13E-15 | -2.63127 | 1 | 1 RP11-349A22.2  | K11488 |
| ENSG00000258837 | 5.13E-15 | -2.63127 | 1 | 1 CTD-2566J3.1   | -      |
| ENSG00000258838 | 5.13E-15 | -2.63127 | 1 | 1 ERCC6-PGBD3    | K10841 |
| ENSG00000258841 | 5.13E-15 | -2.63127 | 1 | 1 RP11-226P1.3   | K03231 |
| ENSG00000258842 | 5.13E-15 | -2.63127 | 1 | 1 RP11-355I22.5  | -      |
| ENSG00000258843 | 5.13E-15 | -2.63127 | 1 | 1 RP11-286O18.1  | -      |
| ENSG00000258844 | 5.13E-15 | -2.63127 | 1 | 1 RP11-259K15.2  | -      |
| ENSG00000258846 | 5.13E-15 | -2.63127 | 1 | 1 EEF1A1P33      | K03231 |
| ENSG00000258847 | 5.13E-15 | -2.63127 | 1 | 1 CTD-2014B16.3  | K07560 |
| ENSG00000258848 | 5.13E-15 | -2.63127 | 1 | 1 GRAMD4P6       | -      |
| ENSG00000258849 | 5.13E-15 | -2.63127 | 1 | 1 OR7E159P       | K04257 |
| ENSG00000258850 | 5.13E-15 | -2.63127 | 1 | 1 RP11-214N1.1   | -      |
| ENSG00000258853 | 5.13E-15 | -2.63127 | 1 | 1 RP11-30G8.1    | -      |
| ENSG00000258854 | 5.13E-15 | -2.63127 | 1 | 1 RP11-463J10.4  | -      |
| ENSG00000258855 | 5.13E-15 | -2.63127 | 1 | 1 OR11J2P        | K04257 |
| ENSG00000258856 | 5.13E-15 | -2.63127 | 1 | 1 CTD-2325K12.1  | K12900 |
| ENSG00000258859 | 5.13E-15 | -2.63127 | 1 | 1 RP11-594C13.1  | -      |
| ENSG00000258860 | 5.13E-15 | -2.63127 | 1 | 1 RP11-561B11.3  | -      |
| ENSG00000258861 | 5.13E-15 | -2.63127 | 1 | 1 MIR381HG       | -      |
| ENSG00000258863 | 5.13E-15 | -2.63127 | 1 | 1 SETP1          | K11290 |
| ENSG00000258864 | 5.13E-15 | -2.63127 | 1 | 1 CTC-554D6.1    | K03105 |
| ENSG00000258866 | 5.13E-15 | -2.63127 | 1 | 1 RP11-991C1.2   | -      |
| ENSG00000258867 | 5.13E-15 | -2.63127 | 1 | 1 LINC01146      | -      |
| ENSG00000258868 | 5.13E-15 | -2.63127 | 1 | 1 RP11-816J8.1   | -      |



|                 |          |          |   |                  |        |
|-----------------|----------|----------|---|------------------|--------|
| ENSG00000258869 | 5.13E-15 | -2.63127 | 1 | 1 RP11-204N11.1  | —      |
| ENSG00000258870 | 5.13E-15 | -2.63127 | 1 | 1 EIF4EBP1P1     | K07205 |
| ENSG00000258871 | 5.13E-15 | -2.63127 | 1 | 1 RP3-514A23.2   | —      |
| ENSG00000258872 | 5.13E-15 | -2.63127 | 1 | 1 FDPSP3         | K00787 |
| ENSG00000258873 | 5.13E-15 | -2.63127 | 1 | 1 DUXA           | K01082 |
| ENSG00000258874 | 5.13E-15 | -2.63127 | 1 | 1 RP11-232C2.2   | —      |
| ENSG00000258875 | 5.13E-15 | -2.63127 | 1 | 1 CTD-2547L24.3  | —      |
| ENSG00000258876 | 5.13E-15 | -2.63127 | 1 | 1 RP11-270M14.5  | —      |
| ENSG00000258877 | 5.13E-15 | -2.63127 | 1 | 1 RP11-395B20.1  | K02132 |
| ENSG00000258878 | 5.13E-15 | -2.63127 | 1 | 1 CTD-2509G16.3  | —      |
| ENSG00000258879 | 5.13E-15 | -2.63127 | 1 | 1 RP11-713N11.5  | —      |
| ENSG00000258881 | 5.13E-15 | -2.63127 | 1 | 1 AC007040.11    | —      |
| ENSG00000258882 | 5.13E-15 | -2.63127 | 1 | 1 CTD-2277K2.1   | —      |
| ENSG00000258883 | 5.13E-15 | -2.63127 | 1 | 1 RP11-32B5.2    | —      |
| ENSG00000258884 | 5.13E-15 | -2.63127 | 1 | 1 CTD-3035D6.2   | —      |
| ENSG00000258885 | 5.13E-15 | -2.63127 | 1 | 1 RP11-344B23.2  | —      |
| ENSG00000258886 | 5.13E-15 | -2.63127 | 1 | 1 HIGD1AP17      | —      |
| ENSG00000258887 | 5.13E-15 | -2.63127 | 1 | 1 RP11-388E23.3  | K11164 |
| ENSG00000258888 | 5.13E-15 | -2.63127 | 1 | 1 RP11-326A13.1  | —      |
| ENSG00000258892 | 5.13E-15 | -2.63127 | 1 | 1 RP11-193F5.1   | —      |
| ENSG00000258893 | 5.13E-15 | -2.63127 | 1 | 1 SETP2          | K11290 |
| ENSG00000258894 | 5.13E-15 | -2.63127 | 1 | 1 RP11-557C9.1   | —      |
| ENSG00000258895 | 5.13E-15 | -2.63127 | 1 | 1 CTD-2643K12.1  | K13126 |
| ENSG00000258897 | 5.13E-15 | -2.63127 | 1 | 1 EGLN3-AS1      | —      |
| ENSG00000258899 | 5.13E-15 | -2.63127 | 1 | 1 OR4U1P         | K04257 |
| ENSG00000258901 | 5.13E-15 | -2.63127 | 1 | 1 CTD-2298J14.1  | K06689 |
| ENSG00000258902 | 5.13E-15 | -2.63127 | 1 | 1 CTD-2128A3.2   | —      |
| ENSG00000258903 | 5.13E-15 | -2.63127 | 1 | 1 RP11-355I22.2  | —      |
| ENSG00000258905 | 5.13E-15 | -2.63127 | 1 | 1 TRAV32         | —      |
| ENSG00000258906 | 5.13E-15 | -2.63127 | 1 | 1 CTD-2552B11.3  | —      |
| ENSG00000258907 | 5.13E-15 | -2.63127 | 1 | 1 RP11-644F5.15  | K02735 |
| ENSG00000258908 | 5.13E-15 | -2.63127 | 1 | 1 RP11-203M5.8   | —      |
| ENSG00000258909 | 5.13E-15 | -2.63127 | 1 | 1 RP11-164C12.2  | —      |
| ENSG00000258910 | 5.13E-15 | -2.63127 | 1 | 1 RP11-19E11.1   | —      |
| ENSG00000258911 | 5.13E-15 | -2.63127 | 1 | 1 DUX4L10        | —      |
| ENSG00000258912 | 5.13E-15 | -2.63127 | 1 | 1 RP11-1079H9.1  | —      |
| ENSG00000258913 | 5.13E-15 | -2.63127 | 1 | 1 RP11-260M19.2  | —      |
| ENSG00000258914 | 5.13E-15 | -2.63127 | 1 | 1 CTD-2134A5.3   | —      |
| ENSG00000258915 | 5.13E-15 | -2.63127 | 1 | 1 RP11-114N19.2  | —      |
| ENSG00000258916 | 5.13E-15 | -2.63127 | 1 | 1 SPATA31E2P     | —      |
| ENSG00000258918 | 5.13E-15 | -2.63127 | 1 | 1 RP11-219E7.4   | —      |
| ENSG00000258919 | 5.13E-15 | -2.63127 | 1 | 1 RP11-1029J19.4 | —      |
| ENSG00000258921 | 5.13E-15 | -2.63127 | 1 | 1 RP11-644F5.16  | —      |
| ENSG00000258923 | 5.13E-15 | -2.63127 | 1 | 1 CTD-2320B12.1  | K03883 |
| ENSG00000258924 | 5.13E-15 | -2.63127 | 1 | 1 CTB-96E2.3     | —      |
| ENSG00000258925 | 5.13E-15 | -2.63127 | 1 | 1 NPM1P5         | K11276 |
| ENSG00000258926 | 5.13E-15 | -2.63127 | 1 | 1 RP11-47I22.1   | —      |
| ENSG00000258928 | 5.13E-15 | -2.63127 | 1 | 1 RP11-463J10.2  | —      |
| ENSG00000258930 | 5.13E-15 | -2.63127 | 1 | 1 RP5-1163L11.2  | —      |
| ENSG00000258931 | 5.13E-15 | -2.63127 | 1 | 1 RP11-1084I9.2  | —      |
| ENSG00000258932 | 5.13E-15 | -2.63127 | 1 | 1 CTD-3006G17.2  | —      |
| ENSG00000258933 | 5.13E-15 | -2.63127 | 1 | 1 RP11-991C1.1   | —      |
| ENSG00000258934 | 5.13E-15 | -2.63127 | 1 | 1 RP11-97N10.1   | —      |
| ENSG00000258935 | 5.13E-15 | -2.63127 | 1 | 1 RP11-1078H9.2  | —      |
| ENSG00000258941 | 5.13E-15 | -2.63127 | 1 | 1 RP11-407N17.3  | —      |
| ENSG00000258942 | 5.13E-15 | -2.63127 | 1 | 1 RP11-255G12.2  | —      |
| ENSG00000258943 | 5.13E-15 | -2.63127 | 1 | 1 RP11-696D21.2  | —      |
| ENSG00000258945 | 5.13E-15 | -2.63127 | 1 | 1 RP11-497E19.2  | —      |

|                 |          |          |   |                  |        |
|-----------------|----------|----------|---|------------------|--------|
| ENSG00000258946 | 5.13E-15 | -2.63127 | 1 | 1 RP11-58E21.4   | -      |
| ENSG00000258948 | 5.13E-15 | -2.63127 | 1 | 1 KRT8P1         | K07605 |
| ENSG00000258949 | 5.13E-15 | -2.63127 | 1 | 1 RP11-857B24.5  | -      |
| ENSG00000258951 | 5.13E-15 | -2.63127 | 1 | 1 KRT18P7        | K07604 |
| ENSG00000258952 | 5.13E-15 | -2.63127 | 1 | 1 RP11-1042B17.5 | -      |
| ENSG00000258954 | 5.13E-15 | -2.63127 | 1 | 1 RP11-692C24.1  | -      |
| ENSG00000258955 | 5.13E-15 | -2.63127 | 1 | 1 LINC00519      | -      |
| ENSG00000258956 | 5.13E-15 | -2.63127 | 1 | 1 COX4I1P1       | K02263 |
| ENSG00000258958 | 5.13E-15 | -2.63127 | 1 | 1 RP11-594C13.2  | -      |
| ENSG00000258960 | 5.13E-15 | -2.63127 | 1 | 1 CTD-2014B16.2  | K00522 |
| ENSG00000258962 | 5.13E-15 | -2.63127 | 1 | 1 RP11-747H7.1   | K00898 |
| ENSG00000258963 | 5.13E-15 | -2.63127 | 1 | 1 RP11-903H12.4  | -      |
| ENSG00000258964 | 5.13E-15 | -2.63127 | 1 | 1 RP11-618G20.1  | -      |
| ENSG00000258965 | 5.13E-15 | -2.63127 | 1 | 1 RP11-446P9.1   | K02963 |
| ENSG00000258966 | 5.13E-15 | -2.63127 | 1 | 1 RP5-1163L11.3  | -      |
| ENSG00000258967 | 5.13E-15 | -2.63127 | 1 | 1 HMGN1P3        | K11299 |
| ENSG00000258968 | 5.13E-15 | -2.63127 | 1 | 1 RP11-829H16.5  | K16473 |
| ENSG00000258969 | 5.13E-15 | -2.63127 | 1 | 1 RP11-305B6.3   | -      |
| ENSG00000258970 | 5.13E-15 | -2.63127 | 1 | 1 RP11-100M12.1  | -      |
| ENSG00000258971 | 5.13E-15 | -2.63127 | 1 | 1 RP11-326A13.3  | -      |
| ENSG00000258972 | 5.13E-15 | -2.63127 | 1 | 1 NDUFB8P1       | K03964 |
| ENSG00000258973 | 5.13E-15 | -2.63127 | 1 | 1 RP11-934B9.3   | K08044 |
| ENSG00000258975 | 5.13E-15 | -2.63127 | 1 | 1 RP11-753D20.1  | -      |
| ENSG00000258976 | 5.13E-15 | -2.63127 | 1 | 1 CTD-2207P18.2  | -      |
| ENSG00000258977 | 5.13E-15 | -2.63127 | 1 | 1 RP11-799P8.1   | -      |
| ENSG00000258978 | 5.13E-15 | -2.63127 | 1 | 1 HIF1AP1        | K08268 |
| ENSG00000258979 | 5.13E-15 | -2.63127 | 1 | 1 RP11-433J8.2   | -      |
| ENSG00000258980 | 5.13E-15 | -2.63127 | 1 | 1 EIF1AXP2       | K03236 |
| ENSG00000258981 | 5.13E-15 | -2.63127 | 1 | 1 COX5AP2        | K02264 |
| ENSG00000258983 | 5.13E-15 | -2.63127 | 1 | 1 RP11-507K2.2   | -      |
| ENSG00000258986 | 5.13E-15 | -2.63127 | 1 | 1 TMEM179        | -      |
| ENSG00000258987 | 5.13E-15 | -2.63127 | 1 | 1 RP11-131H24.4  | K10324 |
| ENSG00000258988 | 5.13E-15 | -2.63127 | 1 | 1 RP11-125H8.1   | K12831 |
| ENSG00000258989 | 5.13E-15 | -2.63127 | 1 | 1 RP11-47I22.4   | K18051 |
| ENSG00000258990 | 5.13E-15 | -2.63127 | 1 | 1 MPPE1P1        | -      |
| ENSG00000258991 | 5.13E-15 | -2.63127 | 1 | 1 DUX4L19        | -      |
| ENSG00000258992 | 5.13E-15 | -2.63127 | 1 | 1 TSPY1          | K11284 |
| ENSG00000258993 | 5.13E-15 | -2.63127 | 1 | 1 RP11-368P15.2  | -      |
| ENSG00000258994 | 5.13E-15 | -2.63127 | 1 | 1 RP11-26L16.1   | -      |
| ENSG00000258995 | 5.13E-15 | -2.63127 | 1 | 1 RP11-1112J20.1 | K10798 |
| ENSG00000258996 | 5.13E-15 | -2.63127 | 1 | 1 CTD-2315A10.1  | K03767 |
| ENSG00000258997 | 5.13E-15 | -2.63127 | 1 | 1 NF1P2          | K08052 |
| ENSG00000258998 | 5.13E-15 | -2.63127 | 1 | 1 RP11-398E10.1  | -      |
| ENSG00000258999 | 5.13E-15 | -2.63127 | 1 | 1 RP11-114N19.3  | -      |
| ENSG00000259000 | 5.13E-15 | -2.63127 | 1 | 1 CTD-2373J19.1  | -      |
| ENSG00000259003 | 5.13E-15 | -2.63127 | 1 | 1 AE000662.92    | -      |
| ENSG00000259004 | 5.13E-15 | -2.63127 | 1 | 1 RP11-8L8.2     | -      |
| ENSG00000259006 | 5.13E-15 | -2.63127 | 1 | 1 RP11-566K11.4  | -      |
| ENSG00000259007 | 5.13E-15 | -2.63127 | 1 | 1 RP11-463J10.3  | -      |
| ENSG00000259008 | 5.13E-15 | -2.63127 | 1 | 1 RP11-932A10.1  | -      |
| ENSG00000259009 | 5.13E-15 | -2.63127 | 1 | 1 TPRX2P         | K09337 |
| ENSG00000259010 | 5.13E-15 | -2.63127 | 1 | 1 RP11-973N13.2  | K14295 |
| ENSG00000259011 | 5.13E-15 | -2.63127 | 1 | 1 RP11-2C7.1     | -      |
| ENSG00000259012 | 5.13E-15 | -2.63127 | 1 | 1 CTD-2320B12.2  | -      |
| ENSG00000259013 | 5.13E-15 | -2.63127 | 1 | 1 RP11-1017G21.3 | K03948 |
| ENSG00000259016 | 5.13E-15 | -2.63127 | 1 | 1 CTD-2335L22.6  | K04257 |
| ENSG00000259017 | 5.13E-15 | -2.63127 | 1 | 1 RP11-561B11.6  | -      |
| ENSG00000259018 | 5.13E-15 | -2.63127 | 1 | 1 RP11-124D2.3   | -      |

|                 |          |          |   |                  |        |
|-----------------|----------|----------|---|------------------|--------|
| ENSG00000259019 | 5.13E-15 | -2.63127 | 1 | 1 RP11-305B6.2   | K03258 |
| ENSG00000259021 | 5.13E-15 | -2.63127 | 1 | 1 TPRX1P1        | -      |
| ENSG00000259023 | 5.13E-15 | -2.63127 | 1 | 1 LINC00524      | -      |
| ENSG00000259025 | 5.13E-15 | -2.63127 | 1 | 1 RP11-810K23.6  | -      |
| ENSG00000259026 | 5.13E-15 | -2.63127 | 1 | 1 RP11-907D1.1   | -      |
| ENSG00000259028 | 5.13E-15 | -2.63127 | 1 | 1 RP11-325D8.1   | -      |
| ENSG00000259029 | 5.13E-15 | -2.63127 | 1 | 1 DUX4L18        | -      |
| ENSG00000259030 | 5.13E-15 | -2.63127 | 1 | 1 FPGT-TNNI3K    | K17535 |
| ENSG00000259033 | 5.13E-15 | -2.63127 | 1 | 1 RP11-718G2.5   | -      |
| ENSG00000259034 | 5.13E-15 | -2.63127 | 1 | 1 DUX4L3         | -      |
| ENSG00000259035 | 5.13E-15 | -2.63127 | 1 | 1 RP11-666E17.1  | -      |
| ENSG00000259036 | 5.13E-15 | -2.63127 | 1 | 1 RP11-404P21.1  | -      |
| ENSG00000259037 | 5.13E-15 | -2.63127 | 1 | 1 RP11-614O9.1   | -      |
| ENSG00000259038 | 5.13E-15 | -2.63127 | 1 | 1 CTD-2325P2.4   | -      |
| ENSG00000259039 | 5.13E-15 | -2.63127 | 1 | 1 RP11-409I10.2  | -      |
| ENSG00000259041 | 5.13E-15 | -2.63127 | 1 | 1 RP11-167B3.1   | -      |
| ENSG00000259042 | 5.13E-15 | -2.63127 | 1 | 1 AE000661.50    | -      |
| ENSG00000259043 | 5.13E-15 | -2.63127 | 1 | 1 BRD7P1         | K11723 |
| ENSG00000259044 | 5.13E-15 | -2.63127 | 1 | 1 RP11-789A21.1  | -      |
| ENSG00000259045 | 5.13E-15 | -2.63127 | 1 | 1 RP11-320M16.1  | K02256 |
| ENSG00000259046 | 5.13E-15 | -2.63127 | 1 | 1 RP11-857B24.2  | K16185 |
| ENSG00000259047 | 5.13E-15 | -2.63127 | 1 | 1 RP11-16O13.1   | K00699 |
| ENSG00000259049 | 5.13E-15 | -2.63127 | 1 | 1 RP11-589M4.1   | -      |
| ENSG00000259050 | 5.13E-15 | -2.63127 | 1 | 1 CHORDC2P       | K16729 |
| ENSG00000259052 | 5.13E-15 | -2.63127 | 1 | 1 AL157871.2     | -      |
| ENSG00000259053 | 5.13E-15 | -2.63127 | 1 | 1 RP11-33N16.3   | -      |
| ENSG00000259054 | 5.13E-15 | -2.63127 | 1 | 1 AE000662.93    | -      |
| ENSG00000259055 | 5.13E-15 | -2.63127 | 1 | 1 RP11-1140I5.1  | -      |
| ENSG00000259057 | 5.13E-15 | -2.63127 | 1 | 1 CTD-2343P13.1  | K13112 |
| ENSG00000259058 | 5.13E-15 | -2.63127 | 1 | 1 RP11-488C13.4  | -      |
| ENSG00000259059 | 5.13E-15 | -2.63127 | 1 | 1 PEBP1P1        | -      |
| ENSG00000259060 | 5.13E-15 | -2.63127 | 1 | 1 RNASE11        | K16633 |
| ENSG00000259061 | 5.13E-15 | -2.63127 | 1 | 1 RP11-736P16.1  | -      |
| ENSG00000259062 | 5.13E-15 | -2.63127 | 1 | 1 ACTN1-AS1      | -      |
| ENSG00000259063 | 5.13E-15 | -2.63127 | 1 | 1 DUX4L5         | -      |
| ENSG00000259064 | 5.13E-15 | -2.63127 | 1 | 1 RP11-386M24.5  | K04370 |
| ENSG00000259066 | 5.13E-15 | -2.63127 | 1 | 1 RP11-371E8.4   | K11979 |
| ENSG00000259067 | 5.13E-15 | -2.63127 | 1 | 1 CTD-3051D23.3  | -      |
| ENSG00000259068 | 5.13E-15 | -2.63127 | 1 | 1 TRAV37         | -      |
| ENSG00000259069 | 5.13E-15 | -2.63127 | 1 | 1 RP11-597A11.6  | -      |
| ENSG00000259072 | 5.13E-15 | -2.63127 | 1 | 1 RP11-96D24.1   | -      |
| ENSG00000259073 | 5.13E-15 | -2.63127 | 1 | 1 FOXN3-AS2      | -      |
| ENSG00000259074 | 5.13E-15 | -2.63127 | 1 | 1 PSMB7P1        | K02739 |
| ENSG00000259075 | 5.13E-15 | -2.63127 | 1 | 1 POC1B-GALNT4   | K00710 |
| ENSG00000259076 | 5.13E-15 | -2.63127 | 1 | 1 RP11-973N13.3  | -      |
| ENSG00000259077 | 5.13E-15 | -2.63127 | 1 | 1 RP11-804L24.2  | -      |
| ENSG00000259080 | 5.13E-15 | -2.63127 | 1 | 1 RP11-158I13.2  | -      |
| ENSG00000259081 | 5.13E-15 | -2.63127 | 1 | 1 RP11-488C13.6  | -      |
| ENSG00000259082 | 5.13E-15 | -2.63127 | 1 | 1 RP11-168L7.3   | -      |
| ENSG00000259084 | 5.13E-15 | -2.63127 | 1 | 1 RP11-1070N10.6 | -      |
| ENSG00000259087 | 5.13E-15 | -2.63127 | 1 | 1 RP11-356O9.2   | -      |
| ENSG00000259089 | 5.13E-15 | -2.63127 | 1 | 1 GRAMD4P5       | -      |
| ENSG00000259090 | 5.13E-15 | -2.63127 | 1 | 1 RP11-173D9.5   | K16944 |
| ENSG00000259092 | 5.13E-15 | -2.63127 | 1 | 1 TRAV30         | -      |
| ENSG00000259093 | 5.13E-15 | -2.63127 | 1 | 1 RP11-1112J20.2 | -      |
| ENSG00000259094 | 5.13E-15 | -2.63127 | 1 | 1 RP11-77A13.1   | -      |
| ENSG00000259095 | 5.13E-15 | -2.63127 | 1 | 1 RP11-98N22.6   | K03121 |
| ENSG00000259097 | 5.13E-15 | -2.63127 | 1 | 1 RP11-61O1.1    | -      |

|                 |          |          |   |                  |        |
|-----------------|----------|----------|---|------------------|--------|
| ENSG00000259098 | 5.13E-15 | -2.63127 | 1 | 1 RP11-603B24.2  | -      |
| ENSG00000259099 | 5.13E-15 | -2.63127 | 1 | 1 RP11-348M3.2   | K16810 |
| ENSG00000259100 | 5.13E-15 | -2.63127 | 1 | 1 RP11-1074O12.1 | K13150 |
| ENSG00000259102 | 5.13E-15 | -2.63127 | 1 | 1 CTD-2552B11.2  | K11651 |
| ENSG00000259103 | 5.13E-15 | -2.63127 | 1 | 1 RP11-270M14.4  | -      |
| ENSG00000259104 | 5.13E-15 | -2.63127 | 1 | 1 PTCSC3         | -      |
| ENSG00000259105 | 5.13E-15 | -2.63127 | 1 | 1 RPS3AP4        | K02984 |
| ENSG00000259106 | 5.13E-15 | -2.63127 | 1 | 1 RP11-242P2.2   | -      |
| ENSG00000259107 | 5.13E-15 | -2.63127 | 1 | 1 LINC00911      | -      |
| ENSG00000259108 | 5.13E-15 | -2.63127 | 1 | 1 CTD-3098H1.2   | -      |
| ENSG00000259109 | 5.13E-15 | -2.63127 | 1 | 1 RP4-687K1.2    | -      |
| ENSG00000259110 | 5.13E-15 | -2.63127 | 1 | 1 RP11-359N5.1   | -      |
| ENSG00000259111 | 5.13E-15 | -2.63127 | 1 | 1 RP11-280K24.1  | -      |
| ENSG00000259112 | 5.13E-15 | -2.63127 | 1 | 1 NDUFC2-KCTD14  | K03968 |
| ENSG00000259114 | 5.13E-15 | -2.63127 | 1 | 1 AC005484.5     | -      |
| ENSG00000259115 | 5.13E-15 | -2.63127 | 1 | 1 CTD-2540L5.5   | -      |
| ENSG00000259117 | 5.13E-15 | -2.63127 | 1 | 1 RP11-476J6.1   | -      |
| ENSG00000259118 | 5.13E-15 | -2.63127 | 1 | 1 RP11-840I19.3  | -      |
| ENSG00000259119 | 5.13E-15 | -2.63127 | 1 | 1 RP11-1127D7.1  | -      |
| ENSG00000259121 | 5.13E-15 | -2.63127 | 1 | 1 RP11-545M17.2  | K02942 |
| ENSG00000259122 | 5.13E-15 | -2.63127 | 1 | 1 TVP23BP1       | -      |
| ENSG00000259123 | 5.13E-15 | -2.63127 | 1 | 1 RP11-76E17.2   | -      |
| ENSG00000259124 | 5.13E-15 | -2.63127 | 1 | 1 RP11-187O7.3   | -      |
| ENSG00000259125 | 5.13E-15 | -2.63127 | 1 | 1 RP11-545N8.3   | -      |
| ENSG00000259126 | 5.13E-15 | -2.63127 | 1 | 1 RP11-99L13.2   | -      |
| ENSG00000259128 | 5.13E-15 | -2.63127 | 1 | 1 DUX4L2         | -      |
| ENSG00000259130 | 5.13E-15 | -2.63127 | 1 | 1 RP11-219E7.3   | -      |
| ENSG00000259132 | 5.13E-15 | -2.63127 | 1 | 1 RP11-298I3.5   | K16587 |
| ENSG00000259133 | 5.13E-15 | -2.63127 | 1 | 1 RP11-1085N6.3  | K09228 |
| ENSG00000259134 | 5.13E-15 | -2.63127 | 1 | 1 LINC00924      | -      |
| ENSG00000259135 | 5.13E-15 | -2.63127 | 1 | 1 RP11-671J11.4  | -      |
| ENSG00000259136 | 5.13E-15 | -2.63127 | 1 | 1 RP11-108M12.2  | K12597 |
| ENSG00000259137 | 5.13E-15 | -2.63127 | 1 | 1 RP11-305B6.1   | -      |
| ENSG00000259139 | 5.13E-15 | -2.63127 | 1 | 1 DUX4L12        | -      |
| ENSG00000259140 | 5.13E-15 | -2.63127 | 1 | 1 RP11-986E7.2   | -      |
| ENSG00000259142 | 5.13E-15 | -2.63127 | 1 | 1 LINC00644      | -      |
| ENSG00000259143 | 5.13E-15 | -2.63127 | 1 | 1 CTD-2240H23.2  | -      |
| ENSG00000259144 | 5.13E-15 | -2.63127 | 1 | 1 RANBP20P       | -      |
| ENSG00000259145 | 5.13E-15 | -2.63127 | 1 | 1 RP11-566K19.9  | -      |
| ENSG00000259148 | 5.13E-15 | -2.63127 | 1 | 1 RP11-322L17.1  | K16197 |
| ENSG00000259149 | 5.13E-15 | -2.63127 | 1 | 1 RP11-313C4.1   | -      |
| ENSG00000259150 | 5.13E-15 | -2.63127 | 1 | 1 LINC00929      | -      |
| ENSG00000259152 | 5.13E-15 | -2.63127 | 1 | 1 RP11-100M12.2  | -      |
| ENSG00000259154 | 5.13E-15 | -2.63127 | 1 | 1 DUX4L17        | -      |
| ENSG00000259156 | 5.13E-15 | -2.63127 | 1 | 1 CHEK2P2        | K06641 |
| ENSG00000259157 | 5.13E-15 | -2.63127 | 1 | 1 RP11-280K24.6  | -      |
| ENSG00000259159 | 5.13E-15 | -2.63127 | 1 | 1 MFRP           | -      |
| ENSG00000259160 | 5.13E-15 | -2.63127 | 1 | 1 RP11-973N13.5  | K02883 |
| ENSG00000259161 | 5.13E-15 | -2.63127 | 1 | 1 CTD-2017C7.3   | K11276 |
| ENSG00000259162 | 5.13E-15 | -2.63127 | 1 | 1 RP11-203M5.6   | -      |
| ENSG00000259163 | 5.13E-15 | -2.63127 | 1 | 1 RP11-1078H9.5  | -      |
| ENSG00000259164 | 5.13E-15 | -2.63127 | 1 | 1 RP11-463C8.4   | -      |
| ENSG00000259166 | 5.13E-15 | -2.63127 | 1 | 1 RP11-1029J19.2 | -      |
| ENSG00000259167 | 5.13E-15 | -2.63127 | 1 | 1 NMNAT1P1       | K06210 |
| ENSG00000259168 | 5.13E-15 | -2.63127 | 1 | 1 RP11-100M12.3  | -      |
| ENSG00000259169 | 5.13E-15 | -2.63127 | 1 | 1 GNRHR2P1       | K04280 |
| ENSG00000259170 | 5.13E-15 | -2.63127 | 1 | 1 RP11-763K15.1  | -      |
| ENSG00000259171 | 5.13E-15 | -2.63127 | 1 | 1 AL163636.6     | K16632 |

|                 |          |          |   |                  |        |
|-----------------|----------|----------|---|------------------|--------|
| ENSG00000259173 | 5.13E-15 | -2.63127 | 1 | 1 RP11-30K9.7    | K02140 |
| ENSG00000259174 | 5.13E-15 | -2.63127 | 1 | 1 RP11-1180F24.1 | K04679 |
| ENSG00000259175 | 5.13E-15 | -2.63127 | 1 | 1 RP11-379K22.2  | -      |
| ENSG00000259176 | 5.13E-15 | -2.63127 | 1 | 1 RP11-69H14.6   | -      |
| ENSG00000259178 | 5.13E-15 | -2.63127 | 1 | 1 CTD-2184D3.3   | -      |
| ENSG00000259179 | 5.13E-15 | -2.63127 | 1 | 1 UBE2CP4        | K06688 |
| ENSG00000259180 | 5.13E-15 | -2.63127 | 1 | 1 RP11-420M1.2   | -      |
| ENSG00000259181 | 5.13E-15 | -2.63127 | 1 | 1 RP11-463I20.3  | -      |
| ENSG00000259183 | 5.13E-15 | -2.63127 | 1 | 1 MED28P6        | -      |
| ENSG00000259184 | 5.13E-15 | -2.63127 | 1 | 1 RP11-566K19.4  | K14559 |
| ENSG00000259185 | 5.13E-15 | -2.63127 | 1 | 1 RP11-56B16.4   | -      |
| ENSG00000259186 | 5.13E-15 | -2.63127 | 1 | 1 MRPS15P1       | -      |
| ENSG00000259187 | 5.13E-15 | -2.63127 | 1 | 1 CTD-2008A1.1   | -      |
| ENSG00000259188 | 5.13E-15 | -2.63127 | 1 | 1 CTD-2647E9.3   | -      |
| ENSG00000259192 | 5.13E-15 | -2.63127 | 1 | 1 AC109631.1     | K15731 |
| ENSG00000259194 | 5.13E-15 | -2.63127 | 1 | 1 RP11-108K3.4   | -      |
| ENSG00000259195 | 5.13E-15 | -2.63127 | 1 | 1 RP11-158M2.6   | K02981 |
| ENSG00000259196 | 5.13E-15 | -2.63127 | 1 | 1 HMBOX1-IT1     | -      |
| ENSG00000259198 | 5.13E-15 | -2.63127 | 1 | 1 RP11-133K1.6   | -      |
| ENSG00000259199 | 5.13E-15 | -2.63127 | 1 | 1 CTD-2544M6.1   | -      |
| ENSG00000259200 | 5.13E-15 | -2.63127 | 1 | 1 RP11-718O11.1  | -      |
| ENSG00000259202 | 5.13E-15 | -2.63127 | 1 | 1 RP11-342M21.2  | -      |
| ENSG00000259203 | 5.13E-15 | -2.63127 | 1 | 1 RP11-209K10.2  | -      |
| ENSG00000259204 | 5.13E-15 | -2.63127 | 1 | 1 RP11-394B5.2   | -      |
| ENSG00000259205 | 5.13E-15 | -2.63127 | 1 | 1 PRKXP1         | K19584 |
| ENSG00000259206 | 5.13E-15 | -2.63127 | 1 | 1 RP13-608F4.8   | -      |
| ENSG00000259207 | 5.13E-15 | -2.63127 | 1 | 1 ITGB3          | K06493 |
| ENSG00000259208 | 5.13E-15 | -2.63127 | 1 | 1 RP11-621H8.1   | -      |
| ENSG00000259213 | 5.13E-15 | -2.63127 | 1 | 1 CTD-2071N1.1   | -      |
| ENSG00000259214 | 5.13E-15 | -2.63127 | 1 | 1 RP11-810K23.7  | -      |
| ENSG00000259217 | 5.13E-15 | -2.63127 | 1 | 1 RP11-702M1.2   | -      |
| ENSG00000259218 | 5.13E-15 | -2.63127 | 1 | 1 LINC00928      | -      |
| ENSG00000259219 | 5.13E-15 | -2.63127 | 1 | 1 CTD-3076O17.2  | -      |
| ENSG00000259221 | 5.13E-15 | -2.63127 | 1 | 1 CTD-2050N2.1   | -      |
| ENSG00000259223 | 5.13E-15 | -2.63127 | 1 | 1 RP11-82L7.4    | -      |
| ENSG00000259225 | 5.13E-15 | -2.63127 | 1 | 1 RP11-1008C21.1 | -      |
| ENSG00000259227 | 5.13E-15 | -2.63127 | 1 | 1 RP11-64K10.1   | -      |
| ENSG00000259228 | 5.13E-15 | -2.63127 | 1 | 1 HNRNPA1P62     | K12741 |
| ENSG00000259229 | 5.13E-15 | -2.63127 | 1 | 1 RP11-38G5.3    | K17603 |
| ENSG00000259231 | 5.13E-15 | -2.63127 | 1 | 1 CTD-2014N11.2  | K12651 |
| ENSG00000259233 | 5.13E-15 | -2.63127 | 1 | 1 RP11-467N20.6  | K14559 |
| ENSG00000259234 | 5.13E-15 | -2.63127 | 1 | 1 RP11-17L5.4    | -      |
| ENSG00000259235 | 5.13E-15 | -2.63127 | 1 | 1 RP11-605F22.2  | -      |
| ENSG00000259236 | 5.13E-15 | -2.63127 | 1 | 1 CTD-2611K5.5   | K10595 |
| ENSG00000259237 | 5.13E-15 | -2.63127 | 1 | 1 RP11-209E8.1   | -      |
| ENSG00000259239 | 5.13E-15 | -2.63127 | 1 | 1 RP11-521C20.1  | K03883 |
| ENSG00000259240 | 5.13E-15 | -2.63127 | 1 | 1 RP11-108K3.1   | -      |
| ENSG00000259241 | 5.13E-15 | -2.63127 | 1 | 1 RP11-313P18.2  | -      |
| ENSG00000259245 | 5.13E-15 | -2.63127 | 1 | 1 RP11-684B21.1  | -      |
| ENSG00000259246 | 5.13E-15 | -2.63127 | 1 | 1 HMGN2P47       | K11300 |
| ENSG00000259247 | 5.13E-15 | -2.63127 | 1 | 1 TTTY25P        | -      |
| ENSG00000259252 | 5.13E-15 | -2.63127 | 1 | 1 AC011648.1     | -      |
| ENSG00000259254 | 5.13E-15 | -2.63127 | 1 | 1 CTD-2339L15.3  | -      |
| ENSG00000259255 | 5.13E-15 | -2.63127 | 1 | 1 RP11-627D16.1  | -      |
| ENSG00000259257 | 5.13E-15 | -2.63127 | 1 | 1 RP11-616M17.1  | -      |
| ENSG00000259258 | 5.13E-15 | -2.63127 | 1 | 1 RP11-325L12.3  | K02880 |
| ENSG00000259259 | 5.13E-15 | -2.63127 | 1 | 1 NPM1P42        | K11276 |
| ENSG00000259261 | 5.13E-15 | -2.63127 | 1 | 1 IGHV4OR15-8    | K06856 |

|                 |          |          |   |                 |        |
|-----------------|----------|----------|---|-----------------|--------|
| ENSG00000259266 | 5.13E-15 | -2.63127 | 1 | 1 RP11-183E24.1 | -      |
| ENSG00000259267 | 5.13E-15 | -2.63127 | 1 | 1 RP11-432J9.6  | -      |
| ENSG00000259269 | 5.13E-15 | -2.63127 | 1 | 1 RP11-624L4.2  | -      |
| ENSG00000259270 | 5.13E-15 | -2.63127 | 1 | 1 RP11-561C5.1  | K11644 |
| ENSG00000259271 | 5.13E-15 | -2.63127 | 1 | 1 ANKRD62P1     | -      |
| ENSG00000259273 | 5.13E-15 | -2.63127 | 1 | 1 RP11-493E3.2  | K09230 |
| ENSG00000259275 | 5.13E-15 | -2.63127 | 1 | 1 RP11-522B15.3 | -      |
| ENSG00000259276 | 5.13E-15 | -2.63127 | 1 | 1 RP11-815J21.3 | -      |
| ENSG00000259277 | 5.13E-15 | -2.63127 | 1 | 1 RP13-126C7.1  | -      |
| ENSG00000259278 | 5.13E-15 | -2.63127 | 1 | 1 RP11-62C7.2   | -      |
| ENSG00000259279 | 5.13E-15 | -2.63127 | 1 | 1 CTD-2033D15.1 | -      |
| ENSG00000259280 | 5.13E-15 | -2.63127 | 1 | 1 RP11-122D10.1 | -      |
| ENSG00000259281 | 5.13E-15 | -2.63127 | 1 | 1 CTD-2632K10.1 | -      |
| ENSG00000259282 | 5.13E-15 | -2.63127 | 1 | 1 SPATA8-AS1    | -      |
| ENSG00000259283 | 5.13E-15 | -2.63127 | 1 | 1 RP11-26L20.3  | -      |
| ENSG00000259284 | 5.13E-15 | -2.63127 | 1 | 1 RP11-162I7.1  | -      |
| ENSG00000259285 | 5.13E-15 | -2.63127 | 1 | 1 CTD-2330J20.2 | -      |
| ENSG00000259288 | 5.13E-15 | -2.63127 | 1 | 1 RP11-133K1.2  | K06637 |
| ENSG00000259289 | 5.13E-15 | -2.63127 | 1 | 1 RP11-798K3.3  | -      |
| ENSG00000259290 | 5.13E-15 | -2.63127 | 1 | 1 RP11-687M24.7 | -      |
| ENSG00000259293 | 5.13E-15 | -2.63127 | 1 | 1 RP11-355N15.1 | -      |
| ENSG00000259296 | 5.13E-15 | -2.63127 | 1 | 1 RP11-313P18.1 | -      |
| ENSG00000259299 | 5.13E-15 | -2.63127 | 1 | 1 RP11-37J13.1  | K11795 |
| ENSG00000259300 | 5.13E-15 | -2.63127 | 1 | 1 TUBBP8        | K07375 |
| ENSG00000259301 | 5.13E-15 | -2.63127 | 1 | 1 RP11-643A5.1  | -      |
| ENSG00000259302 | 5.13E-15 | -2.63127 | 1 | 1 RP11-182J1.11 | -      |
| ENSG00000259303 | 5.13E-15 | -2.63127 | 1 | 1 IGHV2OR16-5   | -      |
| ENSG00000259304 | 5.13E-15 | -2.63127 | 1 | 1 CTD-2014N11.3 | K12651 |
| ENSG00000259306 | 5.13E-15 | -2.63127 | 1 | 1 RP11-108K3.2  | -      |
| ENSG00000259307 | 5.13E-15 | -2.63127 | 1 | 1 PLCB2-AS1     | -      |
| ENSG00000259308 | 5.13E-15 | -2.63127 | 1 | 1 RP11-382A20.1 | K08754 |
| ENSG00000259309 | 5.13E-15 | -2.63127 | 1 | 1 RP11-19J5.2   | -      |
| ENSG00000259310 | 5.13E-15 | -2.63127 | 1 | 1 RP11-152F13.8 | -      |
| ENSG00000259312 | 5.13E-15 | -2.63127 | 1 | 1 RP11-522B15.5 | -      |
| ENSG00000259317 | 5.13E-15 | -2.63127 | 1 | 1 RP11-561C5.7  | K06063 |
| ENSG00000259320 | 5.13E-15 | -2.63127 | 1 | 1 RP11-183E24.2 | -      |
| ENSG00000259324 | 5.13E-15 | -2.63127 | 1 | 1 OR11K1P       | K04257 |
| ENSG00000259325 | 5.13E-15 | -2.63127 | 1 | 1 SPATA31E3P    | -      |
| ENSG00000259331 | 5.13E-15 | -2.63127 | 1 | 1 RP11-57P19.1  | -      |
| ENSG00000259333 | 5.13E-15 | -2.63127 | 1 | 1 RP11-630H24.4 | -      |
| ENSG00000259334 | 5.13E-15 | -2.63127 | 1 | 1 LINC00596     | -      |
| ENSG00000259336 | 5.13E-15 | -2.63127 | 1 | 1 RP11-323I15.5 | -      |
| ENSG00000259337 | 5.13E-15 | -2.63127 | 1 | 1 IGHV1OR15-2   | K06856 |
| ENSG00000259338 | 5.13E-15 | -2.63127 | 1 | 1 CTD-2651B20.2 | K11253 |
| ENSG00000259339 | 5.13E-15 | -2.63127 | 1 | 1 TGIF1P1       | K19383 |
| ENSG00000259340 | 5.13E-15 | -2.63127 | 1 | 1 CTD-2027G2.1  | K02219 |
| ENSG00000259342 | 5.13E-15 | -2.63127 | 1 | 1 RP11-519G16.5 | -      |
| ENSG00000259344 | 5.13E-15 | -2.63127 | 1 | 1 RP11-566K19.6 | K10595 |
| ENSG00000259346 | 5.13E-15 | -2.63127 | 1 | 1 RP11-349G13.2 | K08818 |
| ENSG00000259347 | 5.13E-15 | -2.63127 | 1 | 1 RP11-798K3.2  | -      |
| ENSG00000259350 | 5.13E-15 | -2.63127 | 1 | 1 RP11-63A23.2  | K11299 |
| ENSG00000259352 | 5.13E-15 | -2.63127 | 1 | 1 RP11-109D20.2 | -      |
| ENSG00000259353 | 5.13E-15 | -2.63127 | 1 | 1 RP11-30K9.5   | -      |
| ENSG00000259356 | 5.13E-15 | -2.63127 | 1 | 1 RP11-90E5.1   | -      |
| ENSG00000259357 | 5.13E-15 | -2.63127 | 1 | 1 RP11-316M1.12 | -      |
| ENSG00000259359 | 5.13E-15 | -2.63127 | 1 | 1 RP11-327J17.2 | -      |
| ENSG00000259360 | 5.13E-15 | -2.63127 | 1 | 1 RP11-142J21.1 | -      |
| ENSG00000259361 | 5.13E-15 | -2.63127 | 1 | 1 LINC00927     | -      |

|                 |          |          |   |                  |        |
|-----------------|----------|----------|---|------------------|--------|
| ENSG00000259362 | 5.13E-15 | -2.63127 | 1 | 1 RP11-307C19.1  | —      |
| ENSG00000259363 | 5.13E-15 | -2.63127 | 1 | 1 CTD-2054N24.2  | K10582 |
| ENSG00000259365 | 5.13E-15 | -2.63127 | 1 | 1 RP11-424I19.1  | —      |
| ENSG00000259367 | 5.13E-15 | -2.63127 | 1 | 1 RP11-815J21.4  | —      |
| ENSG00000259368 | 5.13E-15 | -2.63127 | 1 | 1 RP11-64K12.4   | —      |
| ENSG00000259369 | 5.13E-15 | -2.63127 | 1 | 1 RP11-291H24.1  | K02885 |
| ENSG00000259370 | 5.13E-15 | -2.63127 | 1 | 1 RP11-1069G10.1 | —      |
| ENSG00000259372 | 5.13E-15 | -2.63127 | 1 | 1 CTD-2240J17.1  | —      |
| ENSG00000259374 | 5.13E-15 | -2.63127 | 1 | 1 RP11-736N17.4  | K03960 |
| ENSG00000259375 | 5.13E-15 | -2.63127 | 1 | 1 RP11-815J21.2  | —      |
| ENSG00000259376 | 5.13E-15 | -2.63127 | 1 | 1 RP11-505E24.3  | —      |
| ENSG00000259377 | 5.13E-15 | -2.63127 | 1 | 1 CTD-2308G16.1  | —      |
| ENSG00000259379 | 5.13E-15 | -2.63127 | 1 | 1 RP11-925D8.5   | —      |
| ENSG00000259380 | 5.13E-15 | -2.63127 | 1 | 1 RP11-346D14.1  | —      |
| ENSG00000259383 | 5.13E-15 | -2.63127 | 1 | 1 RP11-403B2.6   | —      |
| ENSG00000259384 | 5.13E-15 | -2.63127 | 1 | 1 GH1            | K05438 |
| ENSG00000259385 | 5.13E-15 | -2.63127 | 1 | 1 RP11-605F22.1  | —      |
| ENSG00000259387 | 5.13E-15 | -2.63127 | 1 | 1 ADAMTS7P2      | K08622 |
| ENSG00000259388 | 5.13E-15 | -2.63127 | 1 | 1 CTD-2647E9.1   | K16271 |
| ENSG00000259389 | 5.13E-15 | -2.63127 | 1 | 1 H3F3AP1        | K11253 |
| ENSG00000259390 | 5.13E-15 | -2.63127 | 1 | 1 RP11-27M9.1    | —      |
| ENSG00000259392 | 5.13E-15 | -2.63127 | 1 | 1 RP11-758N13.3  | K10435 |
| ENSG00000259393 | 5.13E-15 | -2.63127 | 1 | 1 RP11-313H3.1   | —      |
| ENSG00000259394 | 5.13E-15 | -2.63127 | 1 | 1 RP11-244F12.1  | K09276 |
| ENSG00000259395 | 5.13E-15 | -2.63127 | 1 | 1 RP11-475A13.2  | —      |
| ENSG00000259396 | 5.13E-15 | -2.63127 | 1 | 1 RP11-16O9.2    | —      |
| ENSG00000259397 | 5.13E-15 | -2.63127 | 1 | 1 RP11-323I15.2  | K12836 |
| ENSG00000259398 | 5.13E-15 | -2.63127 | 1 | 1 RP11-430B1.1   | —      |
| ENSG00000259400 | 5.13E-15 | -2.63127 | 1 | 1 ELMO2P1        | K18985 |
| ENSG00000259401 | 5.13E-15 | -2.63127 | 1 | 1 RP11-566K19.8  | —      |
| ENSG00000259403 | 5.13E-15 | -2.63127 | 1 | 1 RP11-315L6.1   | —      |
| ENSG00000259404 | 5.13E-15 | -2.63127 | 1 | 1 EFTUD1P1       | K14536 |
| ENSG00000259409 | 5.13E-15 | -2.63127 | 1 | 1 RP11-521C20.3  | —      |
| ENSG00000259413 | 5.13E-15 | -2.63127 | 1 | 1 RP11-5O23.1    | —      |
| ENSG00000259418 | 5.13E-15 | -2.63127 | 1 | 1 RP11-109D20.1  | —      |
| ENSG00000259419 | 5.13E-15 | -2.63127 | 1 | 1 HNRNPCP3       | K12884 |
| ENSG00000259420 | 5.13E-15 | -2.63127 | 1 | 1 RP11-307C19.2  | —      |
| ENSG00000259421 | 5.13E-15 | -2.63127 | 1 | 1 CTA-150C2.20   | K18750 |
| ENSG00000259423 | 5.13E-15 | -2.63127 | 1 | 1 RP11-265N7.2   | —      |
| ENSG00000259425 | 5.13E-15 | -2.63127 | 1 | 1 RP11-566K19.5  | —      |
| ENSG00000259427 | 5.13E-15 | -2.63127 | 1 | 1 DPPA5P2        | —      |
| ENSG00000259428 | 5.13E-15 | -2.63127 | 1 | 1 HMGB3P26       | K11296 |
| ENSG00000259430 | 5.13E-15 | -2.63127 | 1 | 1 RP11-168G16.2  | —      |
| ENSG00000259432 | 5.13E-15 | -2.63127 | 1 | 1 RP11-37C7.2    | —      |
| ENSG00000259433 | 5.13E-15 | -2.63127 | 1 | 1 CTD-2651B20.4  | —      |
| ENSG00000259434 | 5.13E-15 | -2.63127 | 1 | 1 RP11-720L8.1   | —      |
| ENSG00000259435 | 5.13E-15 | -2.63127 | 1 | 1 OR4N3P         | K04257 |
| ENSG00000259436 | 5.13E-15 | -2.63127 | 1 | 1 CTC-378H22.2   | —      |
| ENSG00000259437 | 5.13E-15 | -2.63127 | 1 | 1 RP11-798K3.4   | —      |
| ENSG00000259439 | 5.13E-15 | -2.63127 | 1 | 1 RP11-89K21.1   | —      |
| ENSG00000259440 | 5.13E-15 | -2.63127 | 1 | 1 NPM1P43        | K11276 |
| ENSG00000259443 | 5.13E-15 | -2.63127 | 1 | 1 RP11-403B2.5   | —      |
| ENSG00000259444 | 5.13E-15 | -2.63127 | 1 | 1 RP11-736N17.8  | —      |
| ENSG00000259445 | 5.13E-15 | -2.63127 | 1 | 1 RP11-276M12.1  | —      |
| ENSG00000259446 | 5.13E-15 | -2.63127 | 1 | 1 RP11-489D6.2   | —      |
| ENSG00000259447 | 5.13E-15 | -2.63127 | 1 | 1 RP11-462P6.1   | —      |
| ENSG00000259449 | 5.13E-15 | -2.63127 | 1 | 1 NIFKP8         | K14838 |
| ENSG00000259452 | 5.13E-15 | -2.63127 | 1 | 1 RP11-138H8.4   | K02905 |

|                 |          |          |   |                  |        |
|-----------------|----------|----------|---|------------------|--------|
| ENSG00000259454 | 5.13E-15 | -2.63127 | 1 | 1 WBP1LP5        | -      |
| ENSG00000259455 | 5.13E-15 | -2.63127 | 1 | 1 RP11-467N20.5  | K09488 |
| ENSG00000259457 | 5.13E-15 | -2.63127 | 1 | 1 RP11-279F6.2   | -      |
| ENSG00000259458 | 5.13E-15 | -2.63127 | 1 | 1 RP11-625H11.1  | -      |
| ENSG00000259459 | 5.13E-15 | -2.63127 | 1 | 1 RP11-321G12.1  | -      |
| ENSG00000259460 | 5.13E-15 | -2.63127 | 1 | 1 RP11-128A17.1  | -      |
| ENSG00000259461 | 5.13E-15 | -2.63127 | 1 | 1 ANP32BP3       | K18647 |
| ENSG00000259463 | 5.13E-15 | -2.63127 | 1 | 1 RP11-540O11.7  | -      |
| ENSG00000259464 | 5.13E-15 | -2.63127 | 1 | 1 RP11-14C10.1   | K11095 |
| ENSG00000259465 | 5.13E-15 | -2.63127 | 1 | 1 AHCYP7         | K01251 |
| ENSG00000259466 | 5.13E-15 | -2.63127 | 1 | 1 NPM1P47        | K11276 |
| ENSG00000259468 | 5.13E-15 | -2.63127 | 1 | 1 RP11-1084A12.2 | -      |
| ENSG00000259470 | 5.13E-15 | -2.63127 | 1 | 1 KRT8P9         | K07605 |
| ENSG00000259471 | 5.13E-15 | -2.63127 | 1 | 1 RP11-321F6.1   | K09228 |
| ENSG00000259475 | 5.13E-15 | -2.63127 | 1 | 1 RP11-654A16.3  | -      |
| ENSG00000259476 | 5.13E-15 | -2.63127 | 1 | 1 RP11-50C13.2   | -      |
| ENSG00000259477 | 5.13E-15 | -2.63127 | 1 | 1 RP11-86K22.1   | -      |
| ENSG00000259478 | 5.13E-15 | -2.63127 | 1 | 1 RP11-753A21.1  | -      |
| ENSG00000259481 | 5.13E-15 | -2.63127 | 1 | 1 RP11-39M21.1   | -      |
| ENSG00000259482 | 5.13E-15 | -2.63127 | 1 | 1 RP11-219B17.2  | -      |
| ENSG00000259483 | 5.13E-15 | -2.63127 | 1 | 1 RP11-930O11.2  | -      |
| ENSG00000259489 | 5.13E-15 | -2.63127 | 1 | 1 KRT18P47       | K07604 |
| ENSG00000259490 | 5.13E-15 | -2.63127 | 1 | 1 IGHV3OR15-7    | K06856 |
| ENSG00000259493 | 5.13E-15 | -2.63127 | 1 | 1 RP11-621H8.2   | K04683 |
| ENSG00000259495 | 5.13E-15 | -2.63127 | 1 | 1 RP11-210M15.2  | -      |
| ENSG00000259496 | 5.13E-15 | -2.63127 | 1 | 1 RP11-19J5.1    | K13136 |
| ENSG00000259499 | 5.13E-15 | -2.63127 | 1 | 1 RP11-616K22.2  | -      |
| ENSG00000259500 | 5.13E-15 | -2.63127 | 1 | 1 KRT8P24        | K07605 |
| ENSG00000259502 | 5.13E-15 | -2.63127 | 1 | 1 RP11-643G16.3  | K18051 |
| ENSG00000259503 | 5.13E-15 | -2.63127 | 1 | 1 RP11-543G18.1  | -      |
| ENSG00000259505 | 5.13E-15 | -2.63127 | 1 | 1 RP11-74D7.1    | -      |
| ENSG00000259507 | 5.13E-15 | -2.63127 | 1 | 1 RP11-719C20.1  | K17578 |
| ENSG00000259508 | 5.13E-15 | -2.63127 | 1 | 1 RP11-661D19.3  | -      |
| ENSG00000259509 | 5.13E-15 | -2.63127 | 1 | 1 RP11-627D16.2  | -      |
| ENSG00000259511 | 5.13E-15 | -2.63127 | 1 | 1 UBE2Q2L        | K10582 |
| ENSG00000259512 | 5.13E-15 | -2.63127 | 1 | 1 HNRNPA1P5      | K12741 |
| ENSG00000259513 | 5.13E-15 | -2.63127 | 1 | 1 CYCSP38        | K08738 |
| ENSG00000259517 | 5.13E-15 | -2.63127 | 1 | 1 RP11-324D17.1  | -      |
| ENSG00000259518 | 5.13E-15 | -2.63127 | 1 | 1 RP11-597K23.2  | -      |
| ENSG00000259519 | 5.13E-15 | -2.63127 | 1 | 1 RP11-519G16.2  | -      |
| ENSG00000259520 | 5.13E-15 | -2.63127 | 1 | 1 CTD-2651B20.3  | -      |
| ENSG00000259522 | 5.13E-15 | -2.63127 | 1 | 1 RP11-468E2.2   | K17085 |
| ENSG00000259525 | 5.13E-15 | -2.63127 | 1 | 1 GCSHP2         | K02437 |
| ENSG00000259528 | 5.13E-15 | -2.63127 | 1 | 1 RP11-272D12.2  | -      |
| ENSG00000259530 | 5.13E-15 | -2.63127 | 1 | 1 RP11-259A24.1  | -      |
| ENSG00000259533 | 5.13E-15 | -2.63127 | 1 | 1 RP11-630H24.3  | -      |
| ENSG00000259534 | 5.13E-15 | -2.63127 | 1 | 1 RP11-522B15.7  | -      |
| ENSG00000259535 | 5.13E-15 | -2.63127 | 1 | 1 RPL21P12       | K02889 |
| ENSG00000259538 | 5.13E-15 | -2.63127 | 1 | 1 UBE2Q2P11      | K10582 |
| ENSG00000259539 | 5.13E-15 | -2.63127 | 1 | 1 CTD-2651B20.1  | -      |
| ENSG00000259540 | 5.13E-15 | -2.63127 | 1 | 1 RP11-526I2.1   | -      |
| ENSG00000259541 | 5.13E-15 | -2.63127 | 1 | 1 RP11-778O17.4  | -      |
| ENSG00000259542 | 5.13E-15 | -2.63127 | 1 | 1 RP11-522B15.4  | -      |
| ENSG00000259543 | 5.13E-15 | -2.63127 | 1 | 1 CTD-2034I4.1   | -      |
| ENSG00000259544 | 5.13E-15 | -2.63127 | 1 | 1 RP11-158M2.2   | -      |
| ENSG00000259545 | 5.13E-15 | -2.63127 | 1 | 1 RP11-325E5.4   | K02877 |
| ENSG00000259546 | 5.13E-15 | -2.63127 | 1 | 1 RP11-351M8.2   | -      |
| ENSG00000259547 | 5.13E-15 | -2.63127 | 1 | 1 CYCSP2         | K08738 |



|                 |          |          |   |                 |        |
|-----------------|----------|----------|---|-----------------|--------|
| ENSG00000259548 | 5.13E-15 | -2.63127 | 1 | 1 RP11-38G5.2   | -      |
| ENSG00000259549 | 5.13E-15 | -2.63127 | 1 | 1 RP11-115K3.1  | -      |
| ENSG00000259550 | 5.13E-15 | -2.63127 | 1 | 1 HNRNPA1P74    | K12741 |
| ENSG00000259551 | 5.13E-15 | -2.63127 | 1 | 1 RP11-182J1.10 | -      |
| ENSG00000259553 | 5.13E-15 | -2.63127 | 1 | 1 MIR1302-11    | -      |
| ENSG00000259554 | 5.13E-15 | -2.63127 | 1 | 1 RP11-408J6.1  | -      |
| ENSG00000259555 | 5.13E-15 | -2.63127 | 1 | 1 RP11-335K5.2  | -      |
| ENSG00000259557 | 5.13E-15 | -2.63127 | 1 | 1 HMGN1P26      | K11299 |
| ENSG00000259558 | 5.13E-15 | -2.63127 | 1 | 1 MESTP2        | -      |
| ENSG00000259560 | 5.13E-15 | -2.63127 | 1 | 1 RP11-648K4.2  | -      |
| ENSG00000259561 | 5.13E-15 | -2.63127 | 1 | 1 RP11-300G22.2 | -      |
| ENSG00000259564 | 5.13E-15 | -2.63127 | 1 | 1 RP11-16B9.1   | -      |
| ENSG00000259565 | 5.13E-15 | -2.63127 | 1 | 1 KRT8P23       | K07605 |
| ENSG00000259567 | 5.13E-15 | -2.63127 | 1 | 1 DNMI1P38      | K01528 |
| ENSG00000259569 | 5.13E-15 | -2.63127 | 1 | 1 RP11-97O12.3  | K09659 |
| ENSG00000259572 | 5.13E-15 | -2.63127 | 1 | 1 RP11-198M11.2 | -      |
| ENSG00000259575 | 5.13E-15 | -2.63127 | 1 | 1 RP11-39M21.2  | -      |
| ENSG00000259579 | 5.13E-15 | -2.63127 | 1 | 1 RP11-66B24.5  | -      |
| ENSG00000259580 | 5.13E-15 | -2.63127 | 1 | 1 RP11-37C7.1   | -      |
| ENSG00000259585 | 5.13E-15 | -2.63127 | 1 | 1 RP11-150L8.4  | K12840 |
| ENSG00000259586 | 5.13E-15 | -2.63127 | 1 | 1 RP11-66B24.3  | K12834 |
| ENSG00000259587 | 5.13E-15 | -2.63127 | 1 | 1 RP11-463I20.2 | -      |
| ENSG00000259588 | 5.13E-15 | -2.63127 | 1 | 1 RP11-552E10.1 | -      |
| ENSG00000259589 | 5.13E-15 | -2.63127 | 1 | 1 RP11-317G6.1  | -      |
| ENSG00000259590 | 5.13E-15 | -2.63127 | 1 | 1 RP11-20G13.3  | -      |
| ENSG00000259591 | 5.13E-15 | -2.63127 | 1 | 1 RP11-554D20.1 | -      |
| ENSG00000259592 | 5.13E-15 | -2.63127 | 1 | 1 PRELID1P4     | -      |
| ENSG00000259593 | 5.13E-15 | -2.63127 | 1 | 1 RP11-64O12.1  | -      |
| ENSG00000259594 | 5.13E-15 | -2.63127 | 1 | 1 CTD-2034I4.2  | -      |
| ENSG00000259596 | 5.13E-15 | -2.63127 | 1 | 1 RP11-566K19.3 | -      |
| ENSG00000259598 | 5.13E-15 | -2.63127 | 1 | 1 RP11-275I4.1  | -      |
| ENSG00000259600 | 5.13E-15 | -2.63127 | 1 | 1 RP11-925D8.3  | K03881 |
| ENSG00000259601 | 5.13E-15 | -2.63127 | 1 | 1 RP11-568G20.2 | K13179 |
| ENSG00000259602 | 5.13E-15 | -2.63127 | 1 | 1 RP11-138E16.1 | -      |
| ENSG00000259603 | 5.13E-15 | -2.63127 | 1 | 1 CTD-2012M11.3 | -      |
| ENSG00000259606 | 5.13E-15 | -2.63127 | 1 | 1 RP11-316E14.6 | -      |
| ENSG00000259607 | 5.13E-15 | -2.63127 | 1 | 1 CTD-2647L4.5  | -      |
| ENSG00000259608 | 5.13E-15 | -2.63127 | 1 | 1 RP11-23A22.1  | -      |
| ENSG00000259609 | 5.13E-15 | -2.63127 | 1 | 1 RP11-342A23.1 | -      |
| ENSG00000259610 | 5.13E-15 | -2.63127 | 1 | 1 RP11-499F3.1  | -      |
| ENSG00000259611 | 5.13E-15 | -2.63127 | 1 | 1 CTD-2544M6.2  | -      |
| ENSG00000259612 | 5.13E-15 | -2.63127 | 1 | 1 EEF1A1P22     | K03231 |
| ENSG00000259613 | 5.13E-15 | -2.63127 | 1 | 1 RP13-608F4.6  | K02602 |
| ENSG00000259614 | 5.13E-15 | -2.63127 | 1 | 1 RP11-522B15.6 | K07374 |
| ENSG00000259615 | 5.13E-15 | -2.63127 | 1 | 1 RP11-429B14.3 | -      |
| ENSG00000259616 | 5.13E-15 | -2.63127 | 1 | 1 RP11-507B12.2 | -      |
| ENSG00000259619 | 5.13E-15 | -2.63127 | 1 | 1 RP11-390M11.1 | K19678 |
| ENSG00000259620 | 5.13E-15 | -2.63127 | 1 | 1 RP11-133L19.1 | -      |
| ENSG00000259622 | 5.13E-15 | -2.63127 | 1 | 1 RP11-597K23.1 | K09579 |
| ENSG00000259623 | 5.13E-15 | -2.63127 | 1 | 1 RP11-156E6.1  | -      |
| ENSG00000259624 | 5.13E-15 | -2.63127 | 1 | 1 RP11-138H8.3  | -      |
| ENSG00000259626 | 5.13E-15 | -2.63127 | 1 | 1 RP11-925D8.2  | -      |
| ENSG00000259627 | 5.13E-15 | -2.63127 | 1 | 1 RP11-244F12.2 | -      |
| ENSG00000259628 | 5.13E-15 | -2.63127 | 1 | 1 RP11-467H10.2 | -      |
| ENSG00000259631 | 5.13E-15 | -2.63127 | 1 | 1 RP11-557C18.4 | -      |
| ENSG00000259633 | 5.13E-15 | -2.63127 | 1 | 1 UBE2Q2P8      | K10582 |
| ENSG00000259634 | 5.13E-15 | -2.63127 | 1 | 1 RP11-529H20.5 | -      |
| ENSG00000259636 | 5.13E-15 | -2.63127 | 1 | 1 RP11-133L19.2 | -      |

|                 |          |          |   |                 |        |
|-----------------|----------|----------|---|-----------------|--------|
| ENSG00000259637 | 5.13E-15 | -2.63127 | 1 | 1 DNM1P42       | K01528 |
| ENSG00000259639 | 5.13E-15 | -2.63127 | 1 | 1 RP11-184D12.1 | -      |
| ENSG00000259640 | 5.13E-15 | -2.63127 | 1 | 1 RP6-33F8.1    | -      |
| ENSG00000259641 | 5.13E-15 | -2.63127 | 1 | 1 RP11-279F6.3  | -      |
| ENSG00000259644 | 5.13E-15 | -2.63127 | 1 | 1 RP11-680F8.4  | -      |
| ENSG00000259646 | 5.13E-15 | -2.63127 | 1 | 1 AC140725.7    | -      |
| ENSG00000259647 | 5.13E-15 | -2.63127 | 1 | 1 RP11-143J24.1 | -      |
| ENSG00000259648 | 5.13E-15 | -2.63127 | 1 | 1 RP11-643G16.4 | K10802 |
| ENSG00000259650 | 5.13E-15 | -2.63127 | 1 | 1 RP11-272D12.1 | -      |
| ENSG00000259651 | 5.13E-15 | -2.63127 | 1 | 1 CTD-2330J20.1 | K02262 |
| ENSG00000259654 | 5.13E-15 | -2.63127 | 1 | 1 RP11-245C17.2 | -      |
| ENSG00000259655 | 5.13E-15 | -2.63127 | 1 | 1 CTD-2054N24.1 | K10595 |
| ENSG00000259657 | 5.13E-15 | -2.63127 | 1 | 1 PIGHP1        | K03858 |
| ENSG00000259658 | 5.13E-15 | -2.63127 | 1 | 1 RP11-89K11.1  | K10582 |
| ENSG00000259660 | 5.13E-15 | -2.63127 | 1 | 1 DNM1P47       | K01528 |
| ENSG00000259661 | 5.13E-15 | -2.63127 | 1 | 1 AC068831.15   | -      |
| ENSG00000259663 | 5.13E-15 | -2.63127 | 1 | 1 CTD-2314G24.2 | -      |
| ENSG00000259665 | 5.13E-15 | -2.63127 | 1 | 1 RP11-323I15.3 | K18079 |
| ENSG00000259666 | 5.13E-15 | -2.63127 | 1 | 1 RP11-307C19.3 | -      |
| ENSG00000259669 | 5.13E-15 | -2.63127 | 1 | 1 RP11-643A5.2  | -      |
| ENSG00000259670 | 5.13E-15 | -2.63127 | 1 | 1 RP11-485O10.2 | -      |
| ENSG00000259671 | 5.13E-15 | -2.63127 | 1 | 1 RP11-925D8.6  | K00412 |
| ENSG00000259672 | 5.13E-15 | -2.63127 | 1 | 1 RP11-69G7.1   | -      |
| ENSG00000259674 | 5.13E-15 | -2.63127 | 1 | 1 RP11-356M20.1 | K02936 |
| ENSG00000259675 | 5.13E-15 | -2.63127 | 1 | 1 RP11-507B12.1 | -      |
| ENSG00000259676 | 5.13E-15 | -2.63127 | 1 | 1 RP11-343B18.2 | -      |
| ENSG00000259677 | 5.13E-15 | -2.63127 | 1 | 1 RP11-493E3.1  | -      |
| ENSG00000259678 | 5.13E-15 | -2.63127 | 1 | 1 RP11-707P17.1 | -      |
| ENSG00000259680 | 5.13E-15 | -2.63127 | 1 | 1 RP11-812E19.9 | K06856 |
| ENSG00000259681 | 5.13E-15 | -2.63127 | 1 | 1 RP11-96O20.2  | -      |
| ENSG00000259682 | 5.13E-15 | -2.63127 | 1 | 1 RP11-702L15.4 | -      |
| ENSG00000259683 | 5.13E-15 | -2.63127 | 1 | 1 RP11-182J1.14 | K10595 |
| ENSG00000259685 | 5.13E-15 | -2.63127 | 1 | 1 CTD-2315E11.1 | -      |
| ENSG00000259686 | 5.13E-15 | -2.63127 | 1 | 1 HNRNPA1P71    | K12741 |
| ENSG00000259688 | 5.13E-15 | -2.63127 | 1 | 1 RP11-139F4.2  | K03878 |
| ENSG00000259689 | 5.13E-15 | -2.63127 | 1 | 1 ABCB10P1      | K05657 |
| ENSG00000259690 | 5.13E-15 | -2.63127 | 1 | 1 CTD-3118D7.1  | -      |
| ENSG00000259691 | 5.13E-15 | -2.63127 | 1 | 1 FKBP1AP2      | -      |
| ENSG00000259692 | 5.13E-15 | -2.63127 | 1 | 1 RP11-499F3.2  | -      |
| ENSG00000259694 | 5.13E-15 | -2.63127 | 1 | 1 RP13-262C2.3  | -      |
| ENSG00000259695 | 5.13E-15 | -2.63127 | 1 | 1 RP11-14C10.2  | K02880 |
| ENSG00000259696 | 5.13E-15 | -2.63127 | 1 | 1 RP11-126F18.2 | K18327 |
| ENSG00000259697 | 5.13E-15 | -2.63127 | 1 | 1 RP11-299H22.1 | -      |
| ENSG00000259698 | 5.13E-15 | -2.63127 | 1 | 1 KIAA0125P2    | -      |
| ENSG00000259699 | 5.13E-15 | -2.63127 | 1 | 1 HMGB1P8       | K10802 |
| ENSG00000259700 | 5.13E-15 | -2.63127 | 1 | 1 RP11-485O10.3 | -      |
| ENSG00000259701 | 5.13E-15 | -2.63127 | 1 | 1 RP11-108K3.3  | -      |
| ENSG00000259702 | 5.13E-15 | -2.63127 | 1 | 1 RP11-236L14.1 | -      |
| ENSG00000259703 | 5.13E-15 | -2.63127 | 1 | 1 LINC00593     | -      |
| ENSG00000259704 | 5.13E-15 | -2.63127 | 1 | 1 CTD-3094K11.1 | -      |
| ENSG00000259707 | 5.13E-15 | -2.63127 | 1 | 1 RP11-752G15.4 | K12890 |
| ENSG00000259708 | 5.13E-15 | -2.63127 | 1 | 1 RP11-762H8.3  | -      |
| ENSG00000259710 | 5.13E-15 | -2.63127 | 1 | 1 RP11-150L8.3  | -      |
| ENSG00000259711 | 5.13E-15 | -2.63127 | 1 | 1 CTD-3032H12.2 | -      |
| ENSG00000259713 | 5.13E-15 | -2.63127 | 1 | 1 RP11-429B14.1 | -      |
| ENSG00000259714 | 5.13E-15 | -2.63127 | 1 | 1 LINC00594     | -      |
| ENSG00000259716 | 5.13E-15 | -2.63127 | 1 | 1 RP5-977B1.11  | -      |
| ENSG00000259717 | 5.13E-15 | -2.63127 | 1 | 1 LINC00677     | -      |

|                 |          |          |   |                  |        |
|-----------------|----------|----------|---|------------------|--------|
| ENSG00000259719 | 5.13E-15 | -2.63127 | 1 | 1 RP11-930O11.1  | --     |
| ENSG00000259720 | 5.13E-15 | -2.63127 | 1 | 1 RP11-348B17.1  | --     |
| ENSG00000259721 | 5.13E-15 | -2.63127 | 1 | 1 RP11-758N13.1  | --     |
| ENSG00000259722 | 5.13E-15 | -2.63127 | 1 | 1 RP11-94P14.1   | --     |
| ENSG00000259723 | 5.13E-15 | -2.63127 | 1 | 1 RP5-823G15.5   | --     |
| ENSG00000259724 | 5.13E-15 | -2.63127 | 1 | 1 CTD-2643K12.3  | --     |
| ENSG00000259725 | 5.13E-15 | -2.63127 | 1 | 1 CTD-3032H12.1  | --     |
| ENSG00000259731 | 5.13E-15 | -2.63127 | 1 | 1 RP11-326N17.1  | --     |
| ENSG00000259734 | 5.13E-15 | -2.63127 | 1 | 1 RP11-182L7.1   | --     |
| ENSG00000259737 | 5.13E-15 | -2.63127 | 1 | 1 RP11-475A13.1  | --     |
| ENSG00000259738 | 5.13E-15 | -2.63127 | 1 | 1 ZNF444P1       | K09230 |
| ENSG00000259740 | 5.13E-15 | -2.63127 | 1 | 1 RP11-142J21.2  | --     |
| ENSG00000259742 | 5.13E-15 | -2.63127 | 1 | 1 CTD-2014N11.1  | K04613 |
| ENSG00000259743 | 5.13E-15 | -2.63127 | 1 | 1 RP11-315O8.1   | --     |
| ENSG00000259744 | 5.13E-15 | -2.63127 | 1 | 1 RP11-138H8.6   | --     |
| ENSG00000259745 | 5.13E-15 | -2.63127 | 1 | 1 RP11-809H16.3  | K05681 |
| ENSG00000259747 | 5.13E-15 | -2.63127 | 1 | 1 RP11-275I4.2   | --     |
| ENSG00000259749 | 5.13E-15 | -2.63127 | 1 | 1 CTD-2022H16.2  | K06678 |
| ENSG00000259750 | 5.13E-15 | -2.63127 | 1 | 1 RP11-356M20.2  | K14842 |
| ENSG00000259751 | 5.13E-15 | -2.63127 | 1 | 1 RP11-83J16.3   | K07374 |
| ENSG00000259752 | 5.13E-15 | -2.63127 | 1 | 1 FKSG62         | --     |
| ENSG00000259753 | 5.13E-15 | -2.63127 | 1 | 1 ITGB3          | K06493 |
| ENSG00000259755 | 5.13E-15 | -2.63127 | 1 | 1 RP11-505E24.2  | --     |
| ENSG00000259756 | 5.13E-15 | -2.63127 | 1 | 1 RP11-625H11.2  | --     |
| ENSG00000259759 | 5.13E-15 | -2.63127 | 1 | 1 RP11-324D17.2  | --     |
| ENSG00000259760 | 5.13E-15 | -2.63127 | 1 | 1 RP11-20G13.2   | --     |
| ENSG00000259761 | 5.13E-15 | -2.63127 | 1 | 1 RP11-138H10.2  | --     |
| ENSG00000259763 | 5.13E-15 | -2.63127 | 1 | 1 RP11-327J17.1  | --     |
| ENSG00000259764 | 5.13E-15 | -2.63127 | 1 | 1 RP11-299G20.3  | --     |
| ENSG00000259769 | 5.13E-15 | -2.63127 | 1 | 1 RP11-1360M22.2 | --     |
| ENSG00000259770 | 5.13E-15 | -2.63127 | 1 | 1 RP11-81A1.3    | K00787 |
| ENSG00000259773 | 5.13E-15 | -2.63127 | 1 | 1 RP11-507J18.2  | --     |
| ENSG00000259774 | 5.13E-15 | -2.63127 | 1 | 1 RP11-182J1.13  | --     |
| ENSG00000259776 | 5.13E-15 | -2.63127 | 1 | 1 RP11-544D21.2  | --     |
| ENSG00000259779 | 5.13E-15 | -2.63127 | 1 | 1 RP11-231E4.2   | --     |
| ENSG00000259782 | 5.13E-15 | -2.63127 | 1 | 1 CTD-2270L9.2   | --     |
| ENSG00000259783 | 5.13E-15 | -2.63127 | 1 | 1 RP11-1006G14.2 | --     |
| ENSG00000259784 | 5.13E-15 | -2.63127 | 1 | 1 ATP6C          | K01443 |
| ENSG00000259785 | 5.13E-15 | -2.63127 | 1 | 1 ADAMTS7P1      | K08622 |
| ENSG00000259786 | 5.13E-15 | -2.63127 | 1 | 1 CTD-2118P12.1  | --     |
| ENSG00000259788 | 5.13E-15 | -2.63127 | 1 | 1 RP11-359K18.3  | --     |
| ENSG00000259789 | 5.13E-15 | -2.63127 | 1 | 1 RP11-1078H9.6  | --     |
| ENSG00000259791 | 5.13E-15 | -2.63127 | 1 | 1 RP11-14K3.7    | --     |
| ENSG00000259792 | 5.13E-15 | -2.63127 | 1 | 1 RP11-114H24.6  | --     |
| ENSG00000259793 | 5.13E-15 | -2.63127 | 1 | 1 RP11-400N9.1   | --     |
| ENSG00000259798 | 5.13E-15 | -2.63127 | 1 | 1 RP11-23E19.2   | --     |
| ENSG00000259799 | 5.13E-15 | -2.63127 | 1 | 1 RP11-554A11.9  | --     |
| ENSG00000259800 | 5.13E-15 | -2.63127 | 1 | 1 RP11-19N8.6    | K18172 |
| ENSG00000259805 | 5.13E-15 | -2.63127 | 1 | 1 RP11-382A20.5  | --     |
| ENSG00000259807 | 5.13E-15 | -2.63127 | 1 | 1 RP11-426C22.4  | --     |
| ENSG00000259810 | 5.13E-15 | -2.63127 | 1 | 1 AC002519.8     | --     |
| ENSG00000259813 | 5.13E-15 | -2.63127 | 1 | 1 RP5-1142A6.5   | --     |
| ENSG00000259814 | 5.13E-15 | -2.63127 | 1 | 1 RP11-300A12.2  | --     |
| ENSG00000259815 | 5.13E-15 | -2.63127 | 1 | 1 RP11-565N2.2   | --     |
| ENSG00000259817 | 5.13E-15 | -2.63127 | 1 | 1 RP11-53L24.1   | --     |
| ENSG00000259818 | 5.13E-15 | -2.63127 | 1 | 1 RP5-1024G6.7   | --     |
| ENSG00000259819 | 5.13E-15 | -2.63127 | 1 | 1 RP11-568A19.1  | --     |
| ENSG00000259821 | 5.13E-15 | -2.63127 | 1 | 1 RP11-169E6.4   | --     |

|                 |          |          |   |                  |        |
|-----------------|----------|----------|---|------------------|--------|
| ENSG00000259822 | 5.13E-15 | -2.63127 | 1 | 1 RP11-1292F20.1 | K14958 |
| ENSG00000259827 | 5.13E-15 | -2.63127 | 1 | 1 RP11-343H19.2  | --     |
| ENSG00000259828 | 5.13E-15 | -2.63127 | 1 | 1 RP11-63E9.1    | --     |
| ENSG00000259831 | 5.13E-15 | -2.63127 | 1 | 1 LINC00567      | --     |
| ENSG00000259832 | 5.13E-15 | -2.63127 | 1 | 1 CYP4A26P       | K17687 |
| ENSG00000259833 | 5.13E-15 | -2.63127 | 1 | 1 RP11-23E19.1   | --     |
| ENSG00000259834 | 5.13E-15 | -2.63127 | 1 | 1 RP11-284N8.3   | --     |
| ENSG00000259836 | 5.13E-15 | -2.63127 | 1 | 1 RP11-80F22.5   | --     |
| ENSG00000259837 | 5.13E-15 | -2.63127 | 1 | 1 RP11-672L10.1  | --     |
| ENSG00000259839 | 5.13E-15 | -2.63127 | 1 | 1 RP11-491F9.6   | --     |
| ENSG00000259840 | 5.13E-15 | -2.63127 | 1 | 1 LA16c-380A1.1  | --     |
| ENSG00000259841 | 5.13E-15 | -2.63127 | 1 | 1 RP11-488I20.3  | --     |
| ENSG00000259842 | 5.13E-15 | -2.63127 | 1 | 1 IGHV3OR16-16   | K06856 |
| ENSG00000259843 | 5.13E-15 | -2.63127 | 1 | 1 RP11-429P3.3   | --     |
| ENSG00000259844 | 5.13E-15 | -2.63127 | 1 | 1 GNPATP         | K00649 |
| ENSG00000259846 | 5.13E-15 | -2.63127 | 1 | 1 RP11-467L24.1  | --     |
| ENSG00000259847 | 5.13E-15 | -2.63127 | 1 | 1 RP11-95H3.1    | --     |
| ENSG00000259848 | 5.13E-15 | -2.63127 | 1 | 1 AC097374.2     | K18631 |
| ENSG00000259849 | 5.13E-15 | -2.63127 | 1 | 1 VENTXP1        | --     |
| ENSG00000259852 | 5.13E-15 | -2.63127 | 1 | 1 IGHV1OR16-2    | --     |
| ENSG00000259854 | 5.13E-15 | -2.63127 | 1 | 1 RP11-211G23.1  | --     |
| ENSG00000259855 | 5.13E-15 | -2.63127 | 1 | 1 RP11-574O16.1  | --     |
| ENSG00000259859 | 5.13E-15 | -2.63127 | 1 | 1 RP11-439I14.2  | --     |
| ENSG00000259861 | 5.13E-15 | -2.63127 | 1 | 1 CTC-471C19.2   | --     |
| ENSG00000259862 | 5.13E-15 | -2.63127 | 1 | 1 RP11-143E21.6  | --     |
| ENSG00000259864 | 5.13E-15 | -2.63127 | 1 | 1 RP11-370P15.1  | --     |
| ENSG00000259866 | 5.13E-15 | -2.63127 | 1 | 1 RP11-177N22.2  | --     |
| ENSG00000259868 | 5.13E-15 | -2.63127 | 1 | 1 RP11-1012E15.1 | --     |
| ENSG00000259869 | 5.13E-15 | -2.63127 | 1 | 1 AL022344.7     | --     |
| ENSG00000259870 | 5.13E-15 | -2.63127 | 1 | 1 RP11-753A21.2  | --     |
| ENSG00000259873 | 5.13E-15 | -2.63127 | 1 | 1 RP11-481E4.1   | K02889 |
| ENSG00000259874 | 5.13E-15 | -2.63127 | 1 | 1 RP11-170L3.2   | --     |
| ENSG00000259878 | 5.13E-15 | -2.63127 | 1 | 1 RP11-1O10.1    | --     |
| ENSG00000259886 | 5.13E-15 | -2.63127 | 1 | 1 U82695.10      | --     |
| ENSG00000259887 | 5.13E-15 | -2.63127 | 1 | 1 RP11-923I11.5  | --     |
| ENSG00000259888 | 5.13E-15 | -2.63127 | 1 | 1 CTD-2540M10.1  | --     |
| ENSG00000259889 | 5.13E-15 | -2.63127 | 1 | 1 RP11-315F22.1  | --     |
| ENSG00000259890 | 5.13E-15 | -2.63127 | 1 | 1 DNMI1P50       | K01528 |
| ENSG00000259892 | 5.13E-15 | -2.63127 | 1 | 1 RP11-1H8.4     | K04531 |
| ENSG00000259897 | 5.13E-15 | -2.63127 | 1 | 1 RP11-244B22.3  | --     |
| ENSG00000259898 | 5.13E-15 | -2.63127 | 1 | 1 CYP4F33P       | --     |
| ENSG00000259899 | 5.13E-15 | -2.63127 | 1 | 1 CTD-3037G24.3  | --     |
| ENSG00000259900 | 5.13E-15 | -2.63127 | 1 | 1 RP11-343C2.7   | --     |
| ENSG00000259904 | 5.13E-15 | -2.63127 | 1 | 1 RP11-602M11.3  | K05692 |
| ENSG00000259905 | 5.13E-15 | -2.63127 | 1 | 1 PWRN1          | --     |
| ENSG00000259906 | 5.13E-15 | -2.63127 | 1 | 1 RP11-932O9.4   | --     |
| ENSG00000259907 | 5.13E-15 | -2.63127 | 1 | 1 RP6-91H8.2     | --     |
| ENSG00000259909 | 5.13E-15 | -2.63127 | 1 | 1 RP11-1006G14.3 | --     |
| ENSG00000259912 | 5.13E-15 | -2.63127 | 1 | 1 CTC-527H23.2   | --     |
| ENSG00000259914 | 5.13E-15 | -2.63127 | 1 | 1 RP11-298D21.2  | --     |
| ENSG00000259920 | 5.13E-15 | -2.63127 | 1 | 1 RP11-2E11.5    | --     |
| ENSG00000259923 | 5.13E-15 | -2.63127 | 1 | 1 RP11-249C24.11 | --     |
| ENSG00000259926 | 5.13E-15 | -2.63127 | 1 | 1 RP11-44F14.5   | --     |
| ENSG00000259929 | 5.13E-15 | -2.63127 | 1 | 1 CTA-481E9.4    | --     |
| ENSG00000259934 | 5.13E-15 | -2.63127 | 1 | 1 RP11-989E6.1   | K14958 |
| ENSG00000259937 | 5.13E-15 | -2.63127 | 1 | 1 RP11-438D14.2  | --     |
| ENSG00000259939 | 5.13E-15 | -2.63127 | 1 | 1 RP11-77H9.5    | --     |
| ENSG00000259941 | 5.13E-15 | -2.63127 | 1 | 1 RP11-48G14.2   | --     |

|                 |          |          |   |                  |        |
|-----------------|----------|----------|---|------------------|--------|
| ENSG00000259944 | 5.13E-15 | -2.63127 | 1 | 1 CDRT7          | --     |
| ENSG00000259945 | 5.13E-15 | -2.63127 | 1 | 1 CTD-2012K14.3  | --     |
| ENSG00000259946 | 5.13E-15 | -2.63127 | 1 | 1 RP11-490G2.2   | --     |
| ENSG00000259947 | 5.13E-15 | -2.63127 | 1 | 1 XX-DJ76P10_A.2 | --     |
| ENSG00000259948 | 5.13E-15 | -2.63127 | 1 | 1 RP11-326A19.5  | K06096 |
| ENSG00000259950 | 5.13E-15 | -2.63127 | 1 | 1 RP11-170L3.4   | --     |
| ENSG00000259952 | 5.13E-15 | -2.63127 | 1 | 1 AC009133.15    | --     |
| ENSG00000259954 | 5.13E-15 | -2.63127 | 1 | 1 IL21R-AS1      | --     |
| ENSG00000259955 | 5.13E-15 | -2.63127 | 1 | 1 CTD-2547G23.2  | --     |
| ENSG00000259957 | 5.13E-15 | -2.63127 | 1 | 1 RP11-491F9.8   | --     |
| ENSG00000259961 | 5.13E-15 | -2.63127 | 1 | 1 RP4-597A16.2   | --     |
| ENSG00000259962 | 5.13E-15 | -2.63127 | 1 | 1 RP11-44F14.4   | --     |
| ENSG00000259963 | 5.13E-15 | -2.63127 | 1 | 1 RP11-185J20.2  | --     |
| ENSG00000259966 | 5.13E-15 | -2.63127 | 1 | 1 RP11-652G5.1   | --     |
| ENSG00000259967 | 5.13E-15 | -2.63127 | 1 | 1 RP11-2E17.2    | --     |
| ENSG00000259968 | 5.13E-15 | -2.63127 | 1 | 1 RP11-428C6.2   | --     |
| ENSG00000259969 | 5.13E-15 | -2.63127 | 1 | 1 RP11-999E24.3  | --     |
| ENSG00000259970 | 5.13E-15 | -2.63127 | 1 | 1 AC099668.5     | --     |
| ENSG00000259971 | 5.13E-15 | -2.63127 | 1 | 1 RP11-44L9.3    | --     |
| ENSG00000259974 | 5.13E-15 | -2.63127 | 1 | 1 LINC00261      | --     |
| ENSG00000259977 | 5.13E-15 | -2.63127 | 1 | 1 AL121578.2     | --     |
| ENSG00000259978 | 5.13E-15 | -2.63127 | 1 | 1 MRPS21P8       | --     |
| ENSG00000259979 | 5.13E-15 | -2.63127 | 1 | 1 VN1R68P        | K04614 |
| ENSG00000259981 | 5.13E-15 | -2.63127 | 1 | 1 AF096876.1     | --     |
| ENSG00000259983 | 5.13E-15 | -2.63127 | 1 | 1 RP11-169E6.3   | --     |
| ENSG00000259984 | 5.13E-15 | -2.63127 | 1 | 1 RP11-335G20.7  | --     |
| ENSG00000259986 | 5.13E-15 | -2.63127 | 1 | 1 RP11-382A20.4  | --     |
| ENSG00000259987 | 5.13E-15 | -2.63127 | 1 | 1 CTD-2522B17.4  | --     |
| ENSG00000259989 | 5.13E-15 | -2.63127 | 1 | 1 CTD-2555A7.1   | --     |
| ENSG00000259990 | 5.13E-15 | -2.63127 | 1 | 1 RP11-598D12.1  | --     |
| ENSG00000259992 | 5.13E-15 | -2.63127 | 1 | 1 RP11-77K12.8   | --     |
| ENSG00000259993 | 5.13E-15 | -2.63127 | 1 | 1 RP11-261B23.1  | K04955 |
| ENSG00000259995 | 5.13E-15 | -2.63127 | 1 | 1 CTD-2336H13.2  | --     |
| ENSG00000259996 | 5.13E-15 | -2.63127 | 1 | 1 RARRES2P8      | K10044 |
| ENSG00000259997 | 5.13E-15 | -2.63127 | 1 | 1 IGHV1OR16-4    | --     |
| ENSG00000259998 | 5.13E-15 | -2.63127 | 1 | 1 RP11-753D20.4  | --     |
| ENSG00000259999 | 5.13E-15 | -2.63127 | 1 | 1 RP11-252K23.1  | --     |
| ENSG00000260003 | 5.13E-15 | -2.63127 | 1 | 1 RP11-279O17.2  | --     |
| ENSG00000260004 | 5.13E-15 | -2.63127 | 1 | 1 RP11-351A20.2  | --     |
| ENSG00000260009 | 5.13E-15 | -2.63127 | 1 | 1 RP11-65J21.1   | --     |
| ENSG00000260010 | 5.13E-15 | -2.63127 | 1 | 1 ZNF720P1       | K09228 |
| ENSG00000260014 | 5.13E-15 | -2.63127 | 1 | 1 LSM3P5         | K12622 |
| ENSG00000260015 | 5.13E-15 | -2.63127 | 1 | 1 RP11-510M2.5   | --     |
| ENSG00000260019 | 5.13E-15 | -2.63127 | 1 | 1 RP11-218F4.1   | --     |
| ENSG00000260021 | 5.13E-15 | -2.63127 | 1 | 1 RP11-480I12.10 | --     |
| ENSG00000260024 | 5.13E-15 | -2.63127 | 1 | 1 MRPS21P7       | --     |
| ENSG00000260026 | 5.13E-15 | -2.63127 | 1 | 1 CTD-2015G9.1   | --     |
| ENSG00000260029 | 5.13E-15 | -2.63127 | 1 | 1 RP11-401P9.1   | --     |
| ENSG00000260030 | 5.13E-15 | -2.63127 | 1 | 1 RP11-686F15.2  | --     |
| ENSG00000260031 | 5.13E-15 | -2.63127 | 1 | 1 RPL10P14       | K02866 |
| ENSG00000260033 | 5.13E-15 | -2.63127 | 1 | 1 CTC-527H23.1   | K02896 |
| ENSG00000260041 | 5.13E-15 | -2.63127 | 1 | 1 RP11-355E10.1  | --     |
| ENSG00000260042 | 5.13E-15 | -2.63127 | 1 | 1 CTD-2034I21.1  | --     |
| ENSG00000260048 | 5.13E-15 | -2.63127 | 1 | 1 IGHV1OR16-3    | --     |
| ENSG00000260049 | 5.13E-15 | -2.63127 | 1 | 1 RP3-404K8.2    | --     |
| ENSG00000260052 | 5.13E-15 | -2.63127 | 1 | 1 CTC-527H23.3   | --     |
| ENSG00000260053 | 5.13E-15 | -2.63127 | 1 | 1 ABCB10P4       | K05657 |
| ENSG00000260057 | 5.13E-15 | -2.63127 | 1 | 1 RP11-7O14.1    | --     |

|                 |          |          |   |                 |        |
|-----------------|----------|----------|---|-----------------|--------|
| ENSG00000260058 | 5.13E-15 | -2.63127 | 1 | 1 RP11-279O17.3 | --     |
| ENSG00000260059 | 5.13E-15 | -2.63127 | 1 | 1 RP11-231E19.1 | --     |
| ENSG00000260062 | 5.13E-15 | -2.63127 | 1 | 1 RP11-299H22.5 | --     |
| ENSG00000260064 | 5.13E-15 | -2.63127 | 1 | 1 RP11-18F14.4  | --     |
| ENSG00000260066 | 5.13E-15 | -2.63127 | 1 | 1 CTD-2587M23.1 | --     |
| ENSG00000260067 | 5.13E-15 | -2.63127 | 1 | 1 RP11-98C8.1   | --     |
| ENSG00000260068 | 5.13E-15 | -2.63127 | 1 | 1 RP11-439I14.3 | --     |
| ENSG00000260070 | 5.13E-15 | -2.63127 | 1 | 1 RP11-182J23.1 | --     |
| ENSG00000260071 | 5.13E-15 | -2.63127 | 1 | 1 RP11-418I22.2 | --     |
| ENSG00000260072 | 5.13E-15 | -2.63127 | 1 | 1 CTD-2313J23.1 | --     |
| ENSG00000260073 | 5.13E-15 | -2.63127 | 1 | 1 RP11-488I20.9 | --     |
| ENSG00000260078 | 5.13E-15 | -2.63127 | 1 | 1 RP11-44F14.1  | K14559 |
| ENSG00000260084 | 5.13E-15 | -2.63127 | 1 | 1 RP11-615I2.1  | --     |
| ENSG00000260087 | 5.13E-15 | -2.63127 | 1 | 1 PCMTD1P2      | --     |
| ENSG00000260089 | 5.13E-15 | -2.63127 | 1 | 1 ADAM3B        | --     |
| ENSG00000260090 | 5.13E-15 | -2.63127 | 1 | 1 RP11-292D4.3  | --     |
| ENSG00000260092 | 5.13E-15 | -2.63127 | 1 | 1 RP11-77K12.7  | K09670 |
| ENSG00000260093 | 5.13E-15 | -2.63127 | 1 | 1 RP11-1E4.1    | --     |
| ENSG00000260094 | 5.13E-15 | -2.63127 | 1 | 1 LINC00564     | --     |
| ENSG00000260096 | 5.13E-15 | -2.63127 | 1 | 1 DNM1P33       | K01528 |
| ENSG00000260102 | 5.13E-15 | -2.63127 | 1 | 1 LINC01070     | --     |
| ENSG00000260104 | 5.13E-15 | -2.63127 | 1 | 1 RP11-817O13.1 | K11644 |
| ENSG00000260107 | 5.13E-15 | -2.63127 | 1 | 1 AC005606.15   | --     |
| ENSG00000260108 | 5.13E-15 | -2.63127 | 1 | 1 RP11-140H17.1 | --     |
| ENSG00000260109 | 5.13E-15 | -2.63127 | 1 | 1 RP11-883G10.1 | K02977 |
| ENSG00000260111 | 5.13E-15 | -2.63127 | 1 | 1 RP11-529K1.4  | --     |
| ENSG00000260112 | 5.13E-15 | -2.63127 | 1 | 1 CTC-543D15.1  | K05692 |
| ENSG00000260113 | 5.13E-15 | -2.63127 | 1 | 1 RP11-146F11.2 | K02932 |
| ENSG00000260120 | 5.13E-15 | -2.63127 | 1 | 1 RP11-177B4.2  | --     |
| ENSG00000260122 | 5.13E-15 | -2.63127 | 1 | 1 RP11-923I11.3 | --     |
| ENSG00000260123 | 5.13E-15 | -2.63127 | 1 | 1 RP11-326A19.4 | --     |
| ENSG00000260125 | 5.13E-15 | -2.63127 | 1 | 1 AGBL1-AS1     | --     |
| ENSG00000260126 | 5.13E-15 | -2.63127 | 1 | 1 RP11-14N9.2   | --     |
| ENSG00000260128 | 5.13E-15 | -2.63127 | 1 | 1 ULK4P2        | K17545 |
| ENSG00000260131 | 5.13E-15 | -2.63127 | 1 | 1 LINC00556     | --     |
| ENSG00000260132 | 5.13E-15 | -2.63127 | 1 | 1 LA16c-312E8.2 | --     |
| ENSG00000260134 | 5.13E-15 | -2.63127 | 1 | 1 RP11-14K3.2   | --     |
| ENSG00000260135 | 5.13E-15 | -2.63127 | 1 | 1 RP11-212I21.2 | --     |
| ENSG00000260137 | 5.13E-15 | -2.63127 | 1 | 1 RP11-258F22.2 | --     |
| ENSG00000260141 | 5.13E-15 | -2.63127 | 1 | 1 RP11-19N8.4   | --     |
| ENSG00000260142 | 5.13E-15 | -2.63127 | 1 | 1 RP11-764E7.1  | --     |
| ENSG00000260146 | 5.13E-15 | -2.63127 | 1 | 1 CTD-2258A20.3 | --     |
| ENSG00000260147 | 5.13E-15 | -2.63127 | 1 | 1 CTD-3032H12.3 | --     |
| ENSG00000260148 | 5.13E-15 | -2.63127 | 1 | 1 RP11-407G23.1 | --     |
| ENSG00000260151 | 5.13E-15 | -2.63127 | 1 | 1 RP11-748L13.6 | --     |
| ENSG00000260152 | 5.13E-15 | -2.63127 | 1 | 1 RP11-69H7.4   | --     |
| ENSG00000260153 | 5.13E-15 | -2.63127 | 1 | 1 RP11-80F22.7  | --     |
| ENSG00000260158 | 5.13E-15 | -2.63127 | 1 | 1 RP11-67H24.2  | --     |
| ENSG00000260159 | 5.13E-15 | -2.63127 | 1 | 1 RP11-483E23.4 | --     |
| ENSG00000260161 | 5.13E-15 | -2.63127 | 1 | 1 CTD-2588J6.1  | --     |
| ENSG00000260162 | 5.13E-15 | -2.63127 | 1 | 1 RP11-863P13.1 | --     |
| ENSG00000260163 | 5.13E-15 | -2.63127 | 1 | 1 RP11-521O16.2 | --     |
| ENSG00000260165 | 5.13E-15 | -2.63127 | 1 | 1 CTD-2323K18.3 | K08789 |
| ENSG00000260166 | 5.13E-15 | -2.63127 | 1 | 1 RP11-863P13.6 | --     |
| ENSG00000260172 | 5.13E-15 | -2.63127 | 1 | 1 RP11-358M11.3 | --     |
| ENSG00000260173 | 5.13E-15 | -2.63127 | 1 | 1 RP11-2I17.4   | --     |
| ENSG00000260174 | 5.13E-15 | -2.63127 | 1 | 1 CTD-2022H16.3 | --     |
| ENSG00000260182 | 5.13E-15 | -2.63127 | 1 | 1 RP11-616M22.5 | --     |

|                 |          |          |   |                  |        |
|-----------------|----------|----------|---|------------------|--------|
| ENSG00000260183 | 5.13E-15 | -2.63127 | 1 | 1 RP11-109P11.1  | -      |
| ENSG00000260184 | 5.13E-15 | -2.63127 | 1 | 1 RP11-42I10.3   | K03122 |
| ENSG00000260186 | 5.13E-15 | -2.63127 | 1 | 1 RP11-481J2.2   | -      |
| ENSG00000260187 | 5.13E-15 | -2.63127 | 1 | 1 RP11-439I14.1  | K03767 |
| ENSG00000260188 | 5.13E-15 | -2.63127 | 1 | 1 CTA-331P3.1    | -      |
| ENSG00000260192 | 5.13E-15 | -2.63127 | 1 | 1 RP11-756H20.1  | -      |
| ENSG00000260194 | 5.13E-15 | -2.63127 | 1 | 1 RP11-357N13.2  | -      |
| ENSG00000260197 | 5.13E-15 | -2.63127 | 1 | 1 RP11-424G14.1  | -      |
| ENSG00000260201 | 5.13E-15 | -2.63127 | 1 | 1 RP11-143N13.2  | -      |
| ENSG00000260202 | 5.13E-15 | -2.63127 | 1 | 1 RP3-333B15.4   | -      |
| ENSG00000260205 | 5.13E-15 | -2.63127 | 1 | 1 RP11-108B14.5  | -      |
| ENSG00000260206 | 5.13E-15 | -2.63127 | 1 | 1 CTD-2026K11.2  | -      |
| ENSG00000260207 | 5.13E-15 | -2.63127 | 1 | 1 CTD-2522B17.6  | -      |
| ENSG00000260209 | 5.13E-15 | -2.63127 | 1 | 1 RP11-680F20.10 | -      |
| ENSG00000260211 | 5.13E-15 | -2.63127 | 1 | 1 RP13-395E19.2  | K04955 |
| ENSG00000260212 | 5.13E-15 | -2.63127 | 1 | 1 RP11-325O24.5  | K04508 |
| ENSG00000260217 | 5.13E-15 | -2.63127 | 1 | 1 RP11-809F4.3   | -      |
| ENSG00000260218 | 5.13E-15 | -2.63127 | 1 | 1 RP11-170L3.6   | -      |
| ENSG00000260223 | 5.13E-15 | -2.63127 | 1 | 1 RP11-293N14.1  | -      |
| ENSG00000260224 | 5.13E-15 | -2.63127 | 1 | 1 UBL5P4         | -      |
| ENSG00000260228 | 5.13E-15 | -2.63127 | 1 | 1 RP11-483P21.2  | -      |
| ENSG00000260230 | 5.13E-15 | -2.63127 | 1 | 1 FRRS1L         | K17985 |
| ENSG00000260232 | 5.13E-15 | -2.63127 | 1 | 1 PWRN4          | -      |
| ENSG00000260234 | 5.13E-15 | -2.63127 | 1 | 1 RP11-166N6.3   | K08742 |
| ENSG00000260235 | 5.13E-15 | -2.63127 | 1 | 1 CTD-2026K11.3  | -      |
| ENSG00000260237 | 5.13E-15 | -2.63127 | 1 | 1 RP11-148M9.1   | -      |
| ENSG00000260240 | 5.13E-15 | -2.63127 | 1 | 1 RP11-105C20.2  | K09654 |
| ENSG00000260242 | 5.13E-15 | -2.63127 | 1 | 1 CTA-481E9.3    | -      |
| ENSG00000260244 | 5.13E-15 | -2.63127 | 1 | 1 RP11-588K22.2  | -      |
| ENSG00000260246 | 5.13E-15 | -2.63127 | 1 | 1 AC000032.2     | -      |
| ENSG00000260247 | 5.13E-15 | -2.63127 | 1 | 1 SUB1P4         | -      |
| ENSG00000260248 | 5.13E-15 | -2.63127 | 1 | 1 RP11-143K11.1  | -      |
| ENSG00000260249 | 5.13E-15 | -2.63127 | 1 | 1 RP11-401P9.5   | -      |
| ENSG00000260251 | 5.13E-15 | -2.63127 | 1 | 1 RP11-46D6.4    | -      |
| ENSG00000260254 | 5.13E-15 | -2.63127 | 1 | 1 AP000997.2     | -      |
| ENSG00000260255 | 5.13E-15 | -2.63127 | 1 | 1 RP11-185O21.1  | -      |
| ENSG00000260256 | 5.13E-15 | -2.63127 | 1 | 1 AP001063.1     | -      |
| ENSG00000260258 | 5.13E-15 | -2.63127 | 1 | 1 RP11-467J12.2  | -      |
| ENSG00000260262 | 5.13E-15 | -2.63127 | 1 | 1 RP11-440L14.3  | -      |
| ENSG00000260264 | 5.13E-15 | -2.63127 | 1 | 1 AC004125.3     | -      |
| ENSG00000260265 | 5.13E-15 | -2.63127 | 1 | 1 RP11-44F21.5   | -      |
| ENSG00000260268 | 5.13E-15 | -2.63127 | 1 | 1 LINC00919      | -      |
| ENSG00000260271 | 5.13E-15 | -2.63127 | 1 | 1 RP1-45N11.1    | -      |
| ENSG00000260275 | 5.13E-15 | -2.63127 | 1 | 1 RP11-326A19.2  | -      |
| ENSG00000260278 | 5.13E-15 | -2.63127 | 1 | 1 RP11-109G23.3  | -      |
| ENSG00000260280 | 5.13E-15 | -2.63127 | 1 | 1 SLX1B-SULT1A4  | -      |
| ENSG00000260282 | 5.13E-15 | -2.63127 | 1 | 1 EIF4EBP2P2     | K18644 |
| ENSG00000260288 | 5.13E-15 | -2.63127 | 1 | 1 RP11-24M17.4   | -      |
| ENSG00000260289 | 5.13E-15 | -2.63127 | 1 | 1 CTD-2535I10.1  | -      |
| ENSG00000260291 | 5.13E-15 | -2.63127 | 1 | 1 RP11-488I20.2  | -      |
| ENSG00000260298 | 5.13E-15 | -2.63127 | 1 | 1 RP11-429P3.4   | K05692 |
| ENSG00000260300 | 5.13E-15 | -2.63127 | 1 | 1 RP11-505K9.4   | -      |
| ENSG00000260302 | 5.13E-15 | -2.63127 | 1 | 1 RP11-973H7.1   | -      |
| ENSG00000260303 | 5.13E-15 | -2.63127 | 1 | 1 RP11-203B7.2   | -      |
| ENSG00000260304 | 5.13E-15 | -2.63127 | 1 | 1 RP11-388M20.6  | -      |
| ENSG00000260305 | 5.13E-15 | -2.63127 | 1 | 1 NTRK3-AS1      | -      |
| ENSG00000260306 | 5.13E-15 | -2.63127 | 1 | 1 RP11-645C24.5  | -      |
| ENSG00000260307 | 5.13E-15 | -2.63127 | 1 | 1 PABPC1P13      | K13126 |

|                 |          |          |   |                  |        |
|-----------------|----------|----------|---|------------------|--------|
| ENSG00000260308 | 5.13E-15 | -2.63127 | 1 | 1 RP11-104C4.4   | K14958 |
| ENSG00000260310 | 5.13E-15 | -2.63127 | 1 | 1 RP11-27M24.2   | --     |
| ENSG00000260311 | 5.13E-15 | -2.63127 | 1 | 1 RP11-586K12.10 | --     |
| ENSG00000260312 | 5.13E-15 | -2.63127 | 1 | 1 RP11-812E19.7  | --     |
| ENSG00000260316 | 5.13E-15 | -2.63127 | 1 | 1 LA16c-306A4.2  | --     |
| ENSG00000260322 | 5.13E-15 | -2.63127 | 1 | 1 RP11-339A11.2  | --     |
| ENSG00000260326 | 5.13E-15 | -2.63127 | 1 | 1 RP11-467J12.1  | K17080 |
| ENSG00000260327 | 5.13E-15 | -2.63127 | 1 | 1 ACTR3BP3       | K18584 |
| ENSG00000260331 | 5.13E-15 | -2.63127 | 1 | 1 RP11-111J6.2   | --     |
| ENSG00000260332 | 5.13E-15 | -2.63127 | 1 | 1 RP11-50O21.1   | --     |
| ENSG00000260335 | 5.13E-15 | -2.63127 | 1 | 1 RP11-345J4.6   | K13882 |
| ENSG00000260337 | 5.13E-15 | -2.63127 | 1 | 1 RP11-386M24.6  | --     |
| ENSG00000260338 | 5.13E-15 | -2.63127 | 1 | 1 RP11-124K4.1   | --     |
| ENSG00000260340 | 5.13E-15 | -2.63127 | 1 | 1 RP11-254F19.3  | --     |
| ENSG00000260341 | 5.13E-15 | -2.63127 | 1 | 1 RP11-80F22.6   | --     |
| ENSG00000260343 | 5.13E-15 | -2.63127 | 1 | 1 LINC01043      | --     |
| ENSG00000260344 | 5.13E-15 | -2.63127 | 1 | 1 RP11-56L13.6   | K08111 |
| ENSG00000260345 | 5.13E-15 | -2.63127 | 1 | 1 AC009052.12    | --     |
| ENSG00000260351 | 5.13E-15 | -2.63127 | 1 | 1 RP11-382A20.6  | --     |
| ENSG00000260357 | 5.13E-15 | -2.63127 | 1 | 1 DNM1P34        | K01528 |
| ENSG00000260362 | 5.13E-15 | -2.63127 | 1 | 1 RP11-297M9.1   | --     |
| ENSG00000260364 | 5.13E-15 | -2.63127 | 1 | 1 RP11-256I9.3   | --     |
| ENSG00000260368 | 5.13E-15 | -2.63127 | 1 | 1 RP11-521I2.3   | --     |
| ENSG00000260371 | 5.13E-15 | -2.63127 | 1 | 1 RP11-343C2.9   | --     |
| ENSG00000260375 | 5.13E-15 | -2.63127 | 1 | 1 RP11-299H22.4  | --     |
| ENSG00000260377 | 5.13E-15 | -2.63127 | 1 | 1 RP11-646E18.4  | --     |
| ENSG00000260378 | 5.13E-15 | -2.63127 | 1 | 1 CTD-2583P5.1   | --     |
| ENSG00000260379 | 5.13E-15 | -2.63127 | 1 | 1 RP11-483K5.2   | K02955 |
| ENSG00000260385 | 5.13E-15 | -2.63127 | 1 | 1 RP11-450H6.3   | --     |
| ENSG00000260387 | 5.13E-15 | -2.63127 | 1 | 1 RP11-463O9.6   | --     |
| ENSG00000260389 | 5.13E-15 | -2.63127 | 1 | 1 WBP11P1        | K12866 |
| ENSG00000260390 | 5.13E-15 | -2.63127 | 1 | 1 RP11-575I8.1   | --     |
| ENSG00000260391 | 5.13E-15 | -2.63127 | 1 | 1 RP11-71H17.7   | --     |
| ENSG00000260392 | 5.13E-15 | -2.63127 | 1 | 1 RP11-1129I3.1  | --     |
| ENSG00000260393 | 5.13E-15 | -2.63127 | 1 | 1 RP11-297L17.3  | --     |
| ENSG00000260395 | 5.13E-15 | -2.63127 | 1 | 1 CTD-2649C14.1  | --     |
| ENSG00000260398 | 5.13E-15 | -2.63127 | 1 | 1 RP11-594N15.3  | --     |
| ENSG00000260399 | 5.13E-15 | -2.63127 | 1 | 1 RP11-529J17.5  | K14559 |
| ENSG00000260402 | 5.13E-15 | -2.63127 | 1 | 1 RP11-56L13.1   | --     |
| ENSG00000260405 | 5.13E-15 | -2.63127 | 1 | 1 CTD-2576D5.2   | --     |
| ENSG00000260406 | 5.13E-15 | -2.63127 | 1 | 1 RP11-402F9.3   | --     |
| ENSG00000260409 | 5.13E-15 | -2.63127 | 1 | 1 RP11-403B2.7   | --     |
| ENSG00000260410 | 5.13E-15 | -2.63127 | 1 | 1 RP11-505K9.3   | K06631 |
| ENSG00000260411 | 5.13E-15 | -2.63127 | 1 | 1 RP11-420N3.2   | --     |
| ENSG00000260412 | 5.13E-15 | -2.63127 | 1 | 1 RP11-438B23.2  | --     |
| ENSG00000260413 | 5.13E-15 | -2.63127 | 1 | 1 RP11-231C14.6  | --     |
| ENSG00000260414 | 5.13E-15 | -2.63127 | 1 | 1 RP11-1437A8.2  | K08111 |
| ENSG00000260415 | 5.13E-15 | -2.63127 | 1 | 1 AC068987.1     | --     |
| ENSG00000260416 | 5.13E-15 | -2.63127 | 1 | 1 RP5-963E22.5   | --     |
| ENSG00000260419 | 5.13E-15 | -2.63127 | 1 | 1 RP11-1437A8.3  | --     |
| ENSG00000260420 | 5.13E-15 | -2.63127 | 1 | 1 LA16c-444G7.2  | --     |
| ENSG00000260422 | 5.13E-15 | -2.63127 | 1 | 1 RP1-155D22.2   | --     |
| ENSG00000260426 | 5.13E-15 | -2.63127 | 1 | 1 RP5-912I13.1   | --     |
| ENSG00000260427 | 5.13E-15 | -2.63127 | 1 | 1 RP11-488I20.5  | --     |
| ENSG00000260431 | 5.13E-15 | -2.63127 | 1 | 1 RP11-382N13.6  | K03842 |
| ENSG00000260432 | 5.13E-15 | -2.63127 | 1 | 1 RP11-297M9.2   | --     |
| ENSG00000260433 | 5.13E-15 | -2.63127 | 1 | 1 RP11-202D1.2   | --     |
| ENSG00000260436 | 5.13E-15 | -2.63127 | 1 | 1 RP11-20I23.7   | --     |



|                 |          |          |   |                  |        |
|-----------------|----------|----------|---|------------------|--------|
| ENSG00000260438 | 5.13E-15 | -2.63127 | 1 | 1 RP11-405F3.2   | K17885 |
| ENSG00000260440 | 5.13E-15 | -2.63127 | 1 | 1 RP11-1096D5.1  | -      |
| ENSG00000260443 | 5.13E-15 | -2.63127 | 1 | 1 CTD-3057O21.1  | -      |
| ENSG00000260444 | 5.13E-15 | -2.63127 | 1 | 1 RP11-483E23.7  | K04815 |
| ENSG00000260445 | 5.13E-15 | -2.63127 | 1 | 1 CTD-3244O18.5  | K17691 |
| ENSG00000260447 | 5.13E-15 | -2.63127 | 1 | 1 RP11-304L19.2  | -      |
| ENSG00000260449 | 5.13E-15 | -2.63127 | 1 | 1 RP11-244B22.14 | -      |
| ENSG00000260450 | 5.13E-15 | -2.63127 | 1 | 1 RP11-523L20.1  | -      |
| ENSG00000260451 | 5.13E-15 | -2.63127 | 1 | 1 GEMIN8P2       | K13136 |
| ENSG00000260452 | 5.13E-15 | -2.63127 | 1 | 1 TPRKBP2        | -      |
| ENSG00000260454 | 5.13E-15 | -2.63127 | 1 | 1 RP11-367F23.2  | -      |
| ENSG00000260455 | 5.13E-15 | -2.63127 | 1 | 1 CASC14         | -      |
| ENSG00000260457 | 5.13E-15 | -2.63127 | 1 | 1 RP11-723G8.1   | -      |
| ENSG00000260459 | 5.13E-15 | -2.63127 | 1 | 1 FTLP14         | K13625 |
| ENSG00000260460 | 5.13E-15 | -2.63127 | 1 | 1 RP11-284F21.8  | -      |
| ENSG00000260465 | 5.13E-15 | -2.63127 | 1 | 1 RP11-63M22.2   | -      |
| ENSG00000260468 | 5.13E-15 | -2.63127 | 1 | 1 RP11-27M24.3   | -      |
| ENSG00000260469 | 5.13E-15 | -2.63127 | 1 | 1 RP11-8P11.3    | -      |
| ENSG00000260471 | 5.13E-15 | -2.63127 | 1 | 1 AC009120.8     | K03767 |
| ENSG00000260472 | 5.13E-15 | -2.63127 | 1 | 1 CTD-2358C21.2  | -      |
| ENSG00000260473 | 5.13E-15 | -2.63127 | 1 | 1 RP11-923I11.4  | -      |
| ENSG00000260476 | 5.13E-15 | -2.63127 | 1 | 1 RP11-254F7.1   | -      |
| ENSG00000260477 | 5.13E-15 | -2.63127 | 1 | 1 RP11-553E24.2  | -      |
| ENSG00000260478 | 5.13E-15 | -2.63127 | 1 | 1 RP11-142G1.1   | -      |
| ENSG00000260479 | 5.13E-15 | -2.63127 | 1 | 1 RP11-556H2.3   | -      |
| ENSG00000260480 | 5.13E-15 | -2.63127 | 1 | 1 RP11-488I20.4  | -      |
| ENSG00000260483 | 5.13E-15 | -2.63127 | 1 | 1 RP11-151H2.1   | K02962 |
| ENSG00000260484 | 5.13E-15 | -2.63127 | 1 | 1 RP11-1081M5.2  | -      |
| ENSG00000260487 | 5.13E-15 | -2.63127 | 1 | 1 RP11-297C4.3   | -      |
| ENSG00000260492 | 5.13E-15 | -2.63127 | 1 | 1 RP11-686F15.3  | -      |
| ENSG00000260493 | 5.13E-15 | -2.63127 | 1 | 1 RP11-219B4.7   | -      |
| ENSG00000260494 | 5.13E-15 | -2.63127 | 1 | 1 AC002310.10    | -      |
| ENSG00000260497 | 5.13E-15 | -2.63127 | 1 | 1 CTB-55P19.1    | K05651 |
| ENSG00000260504 | 5.13E-15 | -2.63127 | 1 | 1 RP11-558A11.3  | -      |
| ENSG00000260505 | 5.13E-15 | -2.63127 | 1 | 1 RP11-410C4.5   | -      |
| ENSG00000260506 | 5.13E-15 | -2.63127 | 1 | 1 RP11-648F7.1   | -      |
| ENSG00000260507 | 5.13E-15 | -2.63127 | 1 | 1 RP11-356C4.3   | -      |
| ENSG00000260510 | 5.13E-15 | -2.63127 | 1 | 1 AC004381.7     | -      |
| ENSG00000260511 | 5.13E-15 | -2.63127 | 1 | 1 RP11-556H2.2   | -      |
| ENSG00000260514 | 5.13E-15 | -2.63127 | 1 | 1 RP11-368N21.1  | K02947 |
| ENSG00000260516 | 5.13E-15 | -2.63127 | 1 | 1 RP11-17M15.4   | K06641 |
| ENSG00000260517 | 5.13E-15 | -2.63127 | 1 | 1 RP11-426C22.5  | -      |
| ENSG00000260518 | 5.13E-15 | -2.63127 | 1 | 1 BMS1P8         | K14569 |
| ENSG00000260519 | 5.13E-15 | -2.63127 | 1 | 1 RP11-109E24.2  | -      |
| ENSG00000260520 | 5.13E-15 | -2.63127 | 1 | 1 RP11-510M2.6   | -      |
| ENSG00000260521 | 5.13E-15 | -2.63127 | 1 | 1 CTD-2576F9.1   | K14840 |
| ENSG00000260522 | 5.13E-15 | -2.63127 | 1 | 1 RP11-352B15.5  | K10592 |
| ENSG00000260523 | 5.13E-15 | -2.63127 | 1 | 1 RP11-483P21.3  | -      |
| ENSG00000260524 | 5.13E-15 | -2.63127 | 1 | 1 CYP3A52P       | -      |
| ENSG00000260525 | 5.13E-15 | -2.63127 | 1 | 1 RP11-812E19.10 | -      |
| ENSG00000260530 | 5.13E-15 | -2.63127 | 1 | 1 RP11-558A11.2  | -      |
| ENSG00000260532 | 5.13E-15 | -2.63127 | 1 | 1 LA16c-381G6.1  | -      |
| ENSG00000260537 | 5.13E-15 | -2.63127 | 1 | 1 RP11-529K1.3   | K18655 |
| ENSG00000260540 | 5.13E-15 | -2.63127 | 1 | 1 FAM108A9P      | -      |
| ENSG00000260542 | 5.13E-15 | -2.63127 | 1 | 1 RP13-379O24.2  | -      |
| ENSG00000260548 | 5.13E-15 | -2.63127 | 1 | 1 RP6-24A23.6    | K17446 |
| ENSG00000260549 | 5.13E-15 | -2.63127 | 1 | 1 MT1L           | K14739 |
| ENSG00000260550 | 5.13E-15 | -2.63127 | 1 | 1 RP11-457I16.2  | -      |

|                 |          |          |   |                  |        |
|-----------------|----------|----------|---|------------------|--------|
| ENSG00000260551 | 5.13E-15 | -2.63127 | 1 | 1 PWRN2          | --     |
| ENSG00000260555 | 5.13E-15 | -2.63127 | 1 | 1 RP11-728K20.2  | --     |
| ENSG00000260558 | 5.13E-15 | -2.63127 | 1 | 1 RP11-63M22.1   | --     |
| ENSG00000260564 | 5.13E-15 | -2.63127 | 1 | 1 RP11-403N16.3  | --     |
| ENSG00000260566 | 5.13E-15 | -2.63127 | 1 | 1 RP11-20G6.3    | --     |
| ENSG00000260568 | 5.13E-15 | -2.63127 | 1 | 1 CTD-2358C21.3  | --     |
| ENSG00000260569 | 5.13E-15 | -2.63127 | 1 | 1 RP11-669I1.1   | --     |
| ENSG00000260570 | 5.13E-15 | -2.63127 | 1 | 1 RP11-24N18.1   | --     |
| ENSG00000260573 | 5.13E-15 | -2.63127 | 1 | 1 RP11-21B23.3   | --     |
| ENSG00000260574 | 5.13E-15 | -2.63127 | 1 | 1 RP11-801I18.1  | --     |
| ENSG00000260575 | 5.13E-15 | -2.63127 | 1 | 1 RP11-56L13.7   | --     |
| ENSG00000260576 | 5.13E-15 | -2.63127 | 1 | 1 RP11-390D11.2  | K03263 |
| ENSG00000260577 | 5.13E-15 | -2.63127 | 1 | 1 RP11-615I2.2   | --     |
| ENSG00000260578 | 5.13E-15 | -2.63127 | 1 | 1 CTD-2541J13.1  | --     |
| ENSG00000260579 | 5.13E-15 | -2.63127 | 1 | 1 RP11-382A20.2  | --     |
| ENSG00000260580 | 5.13E-15 | -2.63127 | 1 | 1 RP11-142A12.1  | --     |
| ENSG00000260582 | 5.13E-15 | -2.63127 | 1 | 1 TPST2P1        | K01021 |
| ENSG00000260584 | 5.13E-15 | -2.63127 | 1 | 1 RP11-1166P10.7 | K14958 |
| ENSG00000260585 | 5.13E-15 | -2.63127 | 1 | 1 RP13-192B19.2  | --     |
| ENSG00000260586 | 5.13E-15 | -2.63127 | 1 | 1 RP11-592N21.2  | --     |
| ENSG00000260590 | 5.13E-15 | -2.63127 | 1 | 1 RP11-244B22.7  | --     |
| ENSG00000260593 | 5.13E-15 | -2.63127 | 1 | 1 RP11-432I5.2   | --     |
| ENSG00000260594 | 5.13E-15 | -2.63127 | 1 | 1 CTD-2055G21.1  | --     |
| ENSG00000260598 | 5.13E-15 | -2.63127 | 1 | 1 RP11-80F22.13  | --     |
| ENSG00000260599 | 5.13E-15 | -2.63127 | 1 | 1 CTC-457E21.1   | --     |
| ENSG00000260600 | 5.13E-15 | -2.63127 | 1 | 1 RP11-109D24.1  | --     |
| ENSG00000260601 | 5.13E-15 | -2.63127 | 1 | 1 RP11-552C15.1  | --     |
| ENSG00000260603 | 5.13E-15 | -2.63127 | 1 | 1 GS1-21A4.1     | --     |
| ENSG00000260605 | 5.13E-15 | -2.63127 | 1 | 1 RP11-883G14.3  | --     |
| ENSG00000260610 | 5.13E-15 | -2.63127 | 1 | 1 RP11-989E6.11  | --     |
| ENSG00000260611 | 5.13E-15 | -2.63127 | 1 | 1 RP11-352B15.2  | --     |
| ENSG00000260612 | 5.13E-15 | -2.63127 | 1 | 1 RP11-432I5.4   | --     |
| ENSG00000260614 | 5.13E-15 | -2.63127 | 1 | 1 RP11-491F9.1   | --     |
| ENSG00000260616 | 5.13E-15 | -2.63127 | 1 | 1 RP11-327F22.4  | --     |
| ENSG00000260617 | 5.13E-15 | -2.63127 | 1 | 1 RP5-1142A6.7   | --     |
| ENSG00000260618 | 5.13E-15 | -2.63127 | 1 | 1 RP11-23N2.4    | --     |
| ENSG00000260620 | 5.13E-15 | -2.63127 | 1 | 1 RP11-883G14.4  | --     |
| ENSG00000260621 | 5.13E-15 | -2.63127 | 1 | 1 RP11-413H22.2  | --     |
| ENSG00000260622 | 5.13E-15 | -2.63127 | 1 | 1 RP11-690I21.3  | --     |
| ENSG00000260624 | 5.13E-15 | -2.63127 | 1 | 1 RP11-24D15.1   | --     |
| ENSG00000260626 | 5.13E-15 | -2.63127 | 1 | 1 RP11-23E10.3   | --     |
| ENSG00000260628 | 5.13E-15 | -2.63127 | 1 | 1 RP11-1166P10.1 | --     |
| ENSG00000260629 | 5.13E-15 | -2.63127 | 1 | 1 CTD-2643I7.1   | --     |
| ENSG00000260634 | 5.13E-15 | -2.63127 | 1 | 1 RP11-521O16.1  | --     |
| ENSG00000260637 | 5.13E-15 | -2.63127 | 1 | 1 RP11-46C24.5   | --     |
| ENSG00000260639 | 5.13E-15 | -2.63127 | 1 | 1 RP11-602M11.4  | --     |
| ENSG00000260640 | 5.13E-15 | -2.63127 | 1 | 1 KB-1000E4.2    | --     |
| ENSG00000260641 | 5.13E-15 | -2.63127 | 1 | 1 RP11-1299A16.3 | --     |
| ENSG00000260642 | 5.13E-15 | -2.63127 | 1 | 1 RP11-717I24.1  | --     |
| ENSG00000260649 | 5.13E-15 | -2.63127 | 1 | 1 RP11-56L13.4   | K18172 |
| ENSG00000260650 | 5.13E-15 | -2.63127 | 1 | 1 RP11-403P17.2  | --     |
| ENSG00000260658 | 5.13E-15 | -2.63127 | 1 | 1 RP11-368L12.1  | --     |
| ENSG00000260659 | 5.13E-15 | -2.63127 | 1 | 1 RP11-46C24.6   | --     |
| ENSG00000260661 | 5.13E-15 | -2.63127 | 1 | 1 RP11-152L20.3  | --     |
| ENSG00000260662 | 5.13E-15 | -2.63127 | 1 | 1 RP11-626K17.2  | --     |
| ENSG00000260664 | 5.13E-15 | -2.63127 | 1 | 1 AC004158.3     | --     |
| ENSG00000260668 | 5.13E-15 | -2.63127 | 1 | 1 RP11-744D14.1  | --     |
| ENSG00000260670 | 5.13E-15 | -2.63127 | 1 | 1 RP11-447M4.1   | --     |

|                 |          |          |   |                  |        |
|-----------------|----------|----------|---|------------------|--------|
| ENSG00000260672 | 5.13E-15 | -2.63127 | 1 | 1 RP11-1006G14.1 | --     |
| ENSG00000260673 | 5.13E-15 | -2.63127 | 1 | 1 RP4-529N6.2    | --     |
| ENSG00000260674 | 5.13E-15 | -2.63127 | 1 | 1 RP11-591L14.2  | --     |
| ENSG00000260675 | 5.13E-15 | -2.63127 | 1 | 1 CTD-2576D5.3   | --     |
| ENSG00000260676 | 5.13E-15 | -2.63127 | 1 | 1 RP11-510D19.1  | --     |
| ENSG00000260677 | 5.13E-15 | -2.63127 | 1 | 1 RP11-546O6.4   | --     |
| ENSG00000260678 | 5.13E-15 | -2.63127 | 1 | 1 RP11-146F11.4  | --     |
| ENSG00000260680 | 5.13E-15 | -2.63127 | 1 | 1 RP11-80F22.1   | --     |
| ENSG00000260683 | 5.13E-15 | -2.63127 | 1 | 1 CTD-2076M15.1  | --     |
| ENSG00000260687 | 5.13E-15 | -2.63127 | 1 | 1 RP11-44L9.2    | --     |
| ENSG00000260688 | 5.13E-15 | -2.63127 | 1 | 1 RP11-44I10.5   | --     |
| ENSG00000260689 | 5.13E-15 | -2.63127 | 1 | 1 HNRNPA3P11     | K12741 |
| ENSG00000260690 | 5.13E-15 | -2.63127 | 1 | 1 CYCSP39        | K08738 |
| ENSG00000260693 | 5.13E-15 | -2.63127 | 1 | 1 AC026150.8     | --     |
| ENSG00000260694 | 5.13E-15 | -2.63127 | 1 | 1 RP11-556H2.4   | --     |
| ENSG00000260695 | 5.13E-15 | -2.63127 | 1 | 1 RP11-513N24.1  | --     |
| ENSG00000260701 | 5.13E-15 | -2.63127 | 1 | 1 RP11-449J10.1  | --     |
| ENSG00000260702 | 5.13E-15 | -2.63127 | 1 | 1 LA16c-349E11.1 | --     |
| ENSG00000260704 | 5.13E-15 | -2.63127 | 1 | 1 LINC00543      | --     |
| ENSG00000260706 | 5.13E-15 | -2.63127 | 1 | 1 RP11-525K10.1  | --     |
| ENSG00000260714 | 5.13E-15 | -2.63127 | 1 | 1 RP11-266L9.1   | K11447 |
| ENSG00000260715 | 5.13E-15 | -2.63127 | 1 | 1 RP11-744D14.2  | --     |
| ENSG00000260719 | 5.13E-15 | -2.63127 | 1 | 1 AC009133.17    | --     |
| ENSG00000260720 | 5.13E-15 | -2.63127 | 1 | 1 RP11-271O3.1   | --     |
| ENSG00000260721 | 5.13E-15 | -2.63127 | 1 | 1 AF067845.1     | --     |
| ENSG00000260722 | 5.13E-15 | -2.63127 | 1 | 1 VN1R67P        | --     |
| ENSG00000260723 | 5.13E-15 | -2.63127 | 1 | 1 RP11-165M1.2   | --     |
| ENSG00000260724 | 5.13E-15 | -2.63127 | 1 | 1 VN1R69P        | --     |
| ENSG00000260725 | 5.13E-15 | -2.63127 | 1 | 1 AC005307.1     | --     |
| ENSG00000260726 | 5.13E-15 | -2.63127 | 1 | 1 KLF8P1         | K09205 |
| ENSG00000260731 | 5.13E-15 | -2.63127 | 1 | 1 KRT8P22        | K07605 |
| ENSG00000260733 | 5.13E-15 | -2.63127 | 1 | 1 RP11-264L1.4   | --     |
| ENSG00000260734 | 5.13E-15 | -2.63127 | 1 | 1 RP11-510M2.4   | --     |
| ENSG00000260737 | 5.13E-15 | -2.63127 | 1 | 1 RP11-18F14.1   | --     |
| ENSG00000260739 | 5.13E-15 | -2.63127 | 1 | 1 RP11-2F9.4     | --     |
| ENSG00000260740 | 5.13E-15 | -2.63127 | 1 | 1 AC026471.6     | --     |
| ENSG00000260741 | 5.13E-15 | -2.63127 | 1 | 1 CTC-391G2.1    | --     |
| ENSG00000260744 | 5.13E-15 | -2.63127 | 1 | 1 RP11-329J18.3  | --     |
| ENSG00000260746 | 5.13E-15 | -2.63127 | 1 | 1 RP11-14K3.1    | --     |
| ENSG00000260755 | 5.13E-15 | -2.63127 | 1 | 1 RP11-403P17.3  | --     |
| ENSG00000260756 | 5.13E-15 | -2.63127 | 1 | 1 RP11-609N14.1  | --     |
| ENSG00000260758 | 5.13E-15 | -2.63127 | 1 | 1 RP11-553E24.3  | --     |
| ENSG00000260759 | 5.13E-15 | -2.63127 | 1 | 1 RP11-677O4.2   | --     |
| ENSG00000260760 | 5.13E-15 | -2.63127 | 1 | 1 PWRN3          | --     |
| ENSG00000260761 | 5.13E-15 | -2.63127 | 1 | 1 RP11-184E9.2   | --     |
| ENSG00000260762 | 5.13E-15 | -2.63127 | 1 | 1 RP11-143N13.1  | K01896 |
| ENSG00000260763 | 5.13E-15 | -2.63127 | 1 | 1 RP11-445O3.3   | --     |
| ENSG00000260764 | 5.13E-15 | -2.63127 | 1 | 1 RNU7-63P       | K02268 |
| ENSG00000260769 | 5.13E-15 | -2.63127 | 1 | 1 RP11-491F9.5   | --     |
| ENSG00000260771 | 5.13E-15 | -2.63127 | 1 | 1 RP1-39J2.1     | --     |
| ENSG00000260772 | 5.13E-15 | -2.63127 | 1 | 1 RP11-311C24.1  | --     |
| ENSG00000260779 | 5.13E-15 | -2.63127 | 1 | 1 RP11-856M7.1   | --     |
| ENSG00000260780 | 5.13E-15 | -2.63127 | 1 | 1 RP11-580I1.1   | --     |
| ENSG00000260784 | 5.13E-15 | -2.63127 | 1 | 1 AC026150.6     | --     |
| ENSG00000260785 | 5.13E-15 | -2.63127 | 1 | 1 CASC17         | --     |
| ENSG00000260786 | 5.13E-15 | -2.63127 | 1 | 1 RP11-112L7.1   | --     |
| ENSG00000260788 | 5.13E-15 | -2.63127 | 1 | 1 RP11-298D21.1  | --     |
| ENSG00000260790 | 5.13E-15 | -2.63127 | 1 | 1 RP11-21M24.2   | --     |

|                 |          |          |   |                  |        |
|-----------------|----------|----------|---|------------------|--------|
| ENSG00000260795 | 5.13E-15 | -2.63127 | 1 | 1 RP11-107C10.1  | -      |
| ENSG00000260796 | 5.13E-15 | -2.63127 | 1 | 1 RP11-1348G14.5 | -      |
| ENSG00000260797 | 5.13E-15 | -2.63127 | 1 | 1 CTD-2336H13.1  | K02537 |
| ENSG00000260798 | 5.13E-15 | -2.63127 | 1 | 1 RP11-354M1.2   | -      |
| ENSG00000260802 | 5.13E-15 | -2.63127 | 1 | 1 LINC00890      | -      |
| ENSG00000260803 | 5.13E-15 | -2.63127 | 1 | 1 Z84812.4       | -      |
| ENSG00000260807 | 5.13E-15 | -2.63127 | 1 | 1 RP11-161M6.2   | -      |
| ENSG00000260810 | 5.13E-15 | -2.63127 | 1 | 1 CTD-2547L24.4  | -      |
| ENSG00000260812 | 5.13E-15 | -2.63127 | 1 | 1 RARRES2P7      | K10044 |
| ENSG00000260815 | 5.13E-15 | -2.63127 | 1 | 1 RP11-24M17.3   | K03767 |
| ENSG00000260816 | 5.13E-15 | -2.63127 | 1 | 1 RP11-319G9.3   | -      |
| ENSG00000260817 | 5.13E-15 | -2.63127 | 1 | 1 RP11-382N13.4  | K02974 |
| ENSG00000260823 | 5.13E-15 | -2.63127 | 1 | 1 RP11-249C24.10 | -      |
| ENSG00000260824 | 5.13E-15 | -2.63127 | 1 | 1 CTD-2235H24.2  | -      |
| ENSG00000260827 | 5.13E-15 | -2.63127 | 1 | 1 RP11-1437A8.4  | -      |
| ENSG00000260828 | 5.13E-15 | -2.63127 | 1 | 1 HMGB3P32       | K11296 |
| ENSG00000260830 | 5.13E-15 | -2.63127 | 1 | 1 RP11-524O1.4   | -      |
| ENSG00000260831 | 5.13E-15 | -2.63127 | 1 | 1 GHc-362H12.3   | -      |
| ENSG00000260832 | 5.13E-15 | -2.63127 | 1 | 1 CTD-3253I12.1  | -      |
| ENSG00000260834 | 5.13E-15 | -2.63127 | 1 | 1 RP11-256I9.2   | -      |
| ENSG00000260835 | 5.13E-15 | -2.63127 | 1 | 1 RP11-468I15.1  | -      |
| ENSG00000260836 | 5.13E-15 | -2.63127 | 1 | 1 RP11-152F13.10 | K02602 |
| ENSG00000260838 | 5.13E-15 | -2.63127 | 1 | 1 RP11-531A24.3  | -      |
| ENSG00000260840 | 5.13E-15 | -2.63127 | 1 | 1 RP11-60H5.1    | -      |
| ENSG00000260844 | 5.13E-15 | -2.63127 | 1 | 1 RP11-578F21.9  | K04679 |
| ENSG00000260845 | 5.13E-15 | -2.63127 | 1 | 1 RP11-586K12.4  | -      |
| ENSG00000260846 | 5.13E-15 | -2.63127 | 1 | 1 RP11-488I20.7  | -      |
| ENSG00000260847 | 5.13E-15 | -2.63127 | 1 | 1 RP11-17M15.1   | -      |
| ENSG00000260848 | 5.13E-15 | -2.63127 | 1 | 1 CTD-2009A10.1  | -      |
| ENSG00000260850 | 5.13E-15 | -2.63127 | 1 | 1 RP11-437L7.1   | -      |
| ENSG00000260854 | 5.13E-15 | -2.63127 | 1 | 1 CTD-2144E22.8  | -      |
| ENSG00000260857 | 5.13E-15 | -2.63127 | 1 | 1 RP11-80F22.15  | -      |
| ENSG00000260858 | 5.13E-15 | -2.63127 | 1 | 1 RP11-558A11.1  | -      |
| ENSG00000260859 | 5.13E-15 | -2.63127 | 1 | 1 RP11-254F19.2  | -      |
| ENSG00000260861 | 5.13E-15 | -2.63127 | 1 | 1 RP4-576H24.4   | K06551 |
| ENSG00000260862 | 5.13E-15 | -2.63127 | 1 | 1 RP11-22H5.2    | -      |
| ENSG00000260863 | 5.13E-15 | -2.63127 | 1 | 1 CYP2C60P       | K17719 |
| ENSG00000260864 | 5.13E-15 | -2.63127 | 1 | 1 FAM108A8P      | -      |
| ENSG00000260866 | 5.13E-15 | -2.63127 | 1 | 1 RP11-626K17.5  | -      |
| ENSG00000260867 | 5.13E-15 | -2.63127 | 1 | 1 RP11-459F6.1   | -      |
| ENSG00000260869 | 5.13E-15 | -2.63127 | 1 | 1 AC002310.13    | K09228 |
| ENSG00000260876 | 5.13E-15 | -2.63127 | 1 | 1 RP11-345M22.1  | -      |
| ENSG00000260878 | 5.13E-15 | -2.63127 | 1 | 1 RP11-320H14.1  | -      |
| ENSG00000260882 | 5.13E-15 | -2.63127 | 1 | 1 RP11-10K17.3   | -      |
| ENSG00000260883 | 5.13E-15 | -2.63127 | 1 | 1 VN1R65P        | K04614 |
| ENSG00000260886 | 5.13E-15 | -2.63127 | 1 | 1 RP11-432I5.1   | -      |
| ENSG00000260887 | 5.13E-15 | -2.63127 | 1 | 1 RP11-142G1.2   | -      |
| ENSG00000260889 | 5.13E-15 | -2.63127 | 1 | 1 CKBP1          | K00933 |
| ENSG00000260892 | 5.13E-15 | -2.63127 | 1 | 1 CTD-2026K11.1  | -      |
| ENSG00000260894 | 5.13E-15 | -2.63127 | 1 | 1 CTD-2012K14.4  | -      |
| ENSG00000260897 | 5.13E-15 | -2.63127 | 1 | 1 DNMI1P30       | K01528 |
| ENSG00000260898 | 5.13E-15 | -2.63127 | 1 | 1 ADPGK-AS1      | -      |
| ENSG00000260899 | 5.13E-15 | -2.63127 | 1 | 1 RP11-2C24.4    | -      |
| ENSG00000260900 | 5.13E-15 | -2.63127 | 1 | 1 RP11-19N8.3    | K14958 |
| ENSG00000260902 | 5.13E-15 | -2.63127 | 1 | 1 RP11-95M5.1    | -      |
| ENSG00000260905 | 5.13E-15 | -2.63127 | 1 | 1 RP11-105C19.1  | -      |
| ENSG00000260907 | 5.13E-15 | -2.63127 | 1 | 1 AC008088.4     | -      |
| ENSG00000260909 | 5.13E-15 | -2.63127 | 1 | 1 RP11-93O14.1   | -      |

|                 |          |          |   |                 |        |
|-----------------|----------|----------|---|-----------------|--------|
| ENSG00000260913 | 5.13E-15 | -2.63127 | 1 | 1 RP11-243E13.1 | --     |
| ENSG00000260918 | 5.13E-15 | -2.63127 | 1 | 1 RP11-731J8.2  | --     |
| ENSG00000260919 | 5.13E-15 | -2.63127 | 1 | 1 CTD-3154N5.1  | --     |
| ENSG00000260921 | 5.13E-15 | -2.63127 | 1 | 1 RP11-989E6.8  | --     |
| ENSG00000260922 | 5.13E-15 | -2.63127 | 1 | 1 RP11-538I12.3 | --     |
| ENSG00000260926 | 5.13E-15 | -2.63127 | 1 | 1 RP11-380D11.2 | --     |
| ENSG00000260928 | 5.13E-15 | -2.63127 | 1 | 1 SPCS2P1       | K12947 |
| ENSG00000260929 | 5.13E-15 | -2.63127 | 1 | 1 RP11-327F22.1 | --     |
| ENSG00000260930 | 5.13E-15 | -2.63127 | 1 | 1 RP11-214L13.1 | --     |
| ENSG00000260931 | 5.13E-15 | -2.63127 | 1 | 1 RP11-65L3.1   | --     |
| ENSG00000260932 | 5.13E-15 | -2.63127 | 1 | 1 RP11-483P21.6 | --     |
| ENSG00000260933 | 5.13E-15 | -2.63127 | 1 | 1 RP11-164A6.1  | K10749 |
| ENSG00000260937 | 5.13E-15 | -2.63127 | 1 | 1 RP11-548M13.1 | --     |
| ENSG00000260939 | 5.13E-15 | -2.63127 | 1 | 1 RP11-467J12.3 | K17885 |
| ENSG00000260940 | 5.13E-15 | -2.63127 | 1 | 1 RP4-575N6.5   | --     |
| ENSG00000260943 | 5.13E-15 | -2.63127 | 1 | 1 RP11-476D10.1 | --     |
| ENSG00000260945 | 5.13E-15 | -2.63127 | 1 | 1 RP11-916L7.1  | --     |
| ENSG00000260946 | 5.13E-15 | -2.63127 | 1 | 1 RP11-407G23.3 | --     |
| ENSG00000260947 | 5.13E-15 | -2.63127 | 1 | 1 RP11-384P7.7  | --     |
| ENSG00000260951 | 5.13E-15 | -2.63127 | 1 | 1 RP5-978I12.1  | --     |
| ENSG00000260953 | 5.13E-15 | -2.63127 | 1 | 1 RP11-426C22.6 | --     |
| ENSG00000260954 | 5.13E-15 | -2.63127 | 1 | 1 LA16c-425C2.1 | --     |
| ENSG00000260957 | 5.13E-15 | -2.63127 | 1 | 1 RP11-299H22.7 | --     |
| ENSG00000260958 | 5.13E-15 | -2.63127 | 1 | 1 RP11-488I20.8 | --     |
| ENSG00000260959 | 5.13E-15 | -2.63127 | 1 | 1 RP11-350A1.2  | --     |
| ENSG00000260962 | 5.13E-15 | -2.63127 | 1 | 1 LINC00557     | --     |
| ENSG00000260963 | 5.13E-15 | -2.63127 | 1 | 1 RP11-297L17.2 | --     |
| ENSG00000260965 | 5.13E-15 | -2.63127 | 1 | 1 CTC-661I16.1  | K02893 |
| ENSG00000260967 | 5.13E-15 | -2.63127 | 1 | 1 RARRES2P5     | --     |
| ENSG00000260969 | 5.13E-15 | -2.63127 | 1 | 1 RP11-190D6.2  | --     |
| ENSG00000260970 | 5.13E-15 | -2.63127 | 1 | 1 RP11-295D22.1 | --     |
| ENSG00000260972 | 5.13E-15 | -2.63127 | 1 | 1 RP1-58B11.1   | --     |
| ENSG00000260973 | 5.13E-15 | -2.63127 | 1 | 1 RP11-105C19.2 | --     |
| ENSG00000260974 | 5.13E-15 | -2.63127 | 1 | 1 RP11-586K12.8 | --     |
| ENSG00000260975 | 5.13E-15 | -2.63127 | 1 | 1 RP11-142G1.3  | --     |
| ENSG00000260976 | 5.13E-15 | -2.63127 | 1 | 1 GS1-120K12.4  | --     |
| ENSG00000260979 | 5.13E-15 | -2.63127 | 1 | 1 RP11-77H9.8   | --     |
| ENSG00000260981 | 5.13E-15 | -2.63127 | 1 | 1 RP11-315A16.1 | --     |
| ENSG00000260982 | 5.13E-15 | -2.63127 | 1 | 1 RP5-1077H22.2 | --     |
| ENSG00000260983 | 5.13E-15 | -2.63127 | 1 | 1 RP11-150D5.2  | --     |
| ENSG00000260984 | 5.13E-15 | -2.63127 | 1 | 1 FGFR3P5       | --     |
| ENSG00000260986 | 5.13E-15 | -2.63127 | 1 | 1 RP11-854K16.3 | --     |
| ENSG00000260987 | 5.13E-15 | -2.63127 | 1 | 1 RP11-423G4.7  | --     |
| ENSG00000260988 | 5.13E-15 | -2.63127 | 1 | 1 RP11-285A1.1  | --     |
| ENSG00000260990 | 5.13E-15 | -2.63127 | 1 | 1 RP3-518E13.2  | --     |
| ENSG00000260991 | 5.13E-15 | -2.63127 | 1 | 1 RP11-616M22.9 | --     |
| ENSG00000260994 | 5.13E-15 | -2.63127 | 1 | 1 RP11-14K3.3   | --     |
| ENSG00000260995 | 5.13E-15 | -2.63127 | 1 | 1 RP11-165H23.1 | --     |
| ENSG00000260999 | 5.13E-15 | -2.63127 | 1 | 1 RP11-521L9.1  | --     |
| ENSG00000261000 | 5.13E-15 | -2.63127 | 1 | 1 RP11-534L20.5 | --     |
| ENSG00000261003 | 5.13E-15 | -2.63127 | 1 | 1 RP1-140C12.2  | --     |
| ENSG00000261007 | 5.13E-15 | -2.63127 | 1 | 1 RP11-382N13.3 | K11276 |
| ENSG00000261009 | 5.13E-15 | -2.63127 | 1 | 1 RP11-1437A8.5 | --     |
| ENSG00000261010 | 5.13E-15 | -2.63127 | 1 | 1 RARRES2P6     | --     |
| ENSG00000261011 | 5.13E-15 | -2.63127 | 1 | 1 RP11-96C23.11 | K12491 |
| ENSG00000261012 | 5.13E-15 | -2.63127 | 1 | 1 RP11-116D2.1  | --     |
| ENSG00000261013 | 5.13E-15 | -2.63127 | 1 | 1 CTD-2050B12.1 | --     |
| ENSG00000261014 | 5.13E-15 | -2.63127 | 1 | 1 RP11-370P15.2 | --     |

|                 |          |          |   |                    |        |
|-----------------|----------|----------|---|--------------------|--------|
| ENSG00000261017 | 5.13E-15 | -2.63127 | 1 | 1 RP11-3M1.3       | K16340 |
| ENSG00000261018 | 5.13E-15 | -2.63127 | 1 | 1 LL09NC01-254D11. | -      |
| ENSG00000261020 | 5.13E-15 | -2.63127 | 1 | 1 RP11-744K17.1    | -      |
| ENSG00000261025 | 5.13E-15 | -2.63127 | 1 | 1 RP11-84D1.2      | -      |
| ENSG00000261028 | 5.13E-15 | -2.63127 | 1 | 1 AC012322.1       | -      |
| ENSG00000261029 | 5.13E-15 | -2.63127 | 1 | 1 CTD-2588J6.2     | -      |
| ENSG00000261030 | 5.13E-15 | -2.63127 | 1 | 1 RP11-791M20.1    | -      |
| ENSG00000261033 | 5.13E-15 | -2.63127 | 1 | 1 RP11-209D14.2    | -      |
| ENSG00000261035 | 5.13E-15 | -2.63127 | 1 | 1 RP11-151E14.1    | -      |
| ENSG00000261036 | 5.13E-15 | -2.63127 | 1 | 1 RP11-574H6.1     | -      |
| ENSG00000261038 | 5.13E-15 | -2.63127 | 1 | 1 RP1-149C7.1      | -      |
| ENSG00000261039 | 5.13E-15 | -2.63127 | 1 | 1 RP11-417E7.2     | -      |
| ENSG00000261041 | 5.13E-15 | -2.63127 | 1 | 1 RP11-536P16.4    | K14559 |
| ENSG00000261043 | 5.13E-15 | -2.63127 | 1 | 1 MIR4313          | -      |
| ENSG00000261045 | 5.13E-15 | -2.63127 | 1 | 1 RP11-673P17.4    | -      |
| ENSG00000261046 | 5.13E-15 | -2.63127 | 1 | 1 RP11-14K3.4      | -      |
| ENSG00000261047 | 5.13E-15 | -2.63127 | 1 | 1 AC137527.2       | -      |
| ENSG00000261048 | 5.13E-15 | -2.63127 | 1 | 1 RP11-810K23.9    | -      |
| ENSG00000261049 | 5.13E-15 | -2.63127 | 1 | 1 RP11-357N13.1    | -      |
| ENSG00000261053 | 5.13E-15 | -2.63127 | 1 | 1 CTD-2144E22.2    | K03462 |
| ENSG00000261054 | 5.13E-15 | -2.63127 | 1 | 1 RP11-6O2.4       | -      |
| ENSG00000261055 | 5.13E-15 | -2.63127 | 1 | 1 RP11-195M16.3    | -      |
| ENSG00000261057 | 5.13E-15 | -2.63127 | 1 | 1 LINC00555        | -      |
| ENSG00000261058 | 5.13E-15 | -2.63127 | 1 | 1 RP11-252E2.2     | -      |
| ENSG00000261060 | 5.13E-15 | -2.63127 | 1 | 1 RP11-545A16.4    | -      |
| ENSG00000261063 | 5.13E-15 | -2.63127 | 1 | 1 RP11-538I12.2    | -      |
| ENSG00000261065 | 5.13E-15 | -2.63127 | 1 | 1 RP11-74C13.4     | -      |
| ENSG00000261066 | 5.13E-15 | -2.63127 | 1 | 1 RP11-483K5.3     | -      |
| ENSG00000261068 | 5.13E-15 | -2.63127 | 1 | 1 RP11-7K24.3      | -      |
| ENSG00000261069 | 5.13E-15 | -2.63127 | 1 | 1 SNORD116-20      | -      |
| ENSG00000261070 | 5.13E-15 | -2.63127 | 1 | 1 RP11-554A11.8    | -      |
| ENSG00000261075 | 5.13E-15 | -2.63127 | 1 | 1 RP11-243A14.3    | -      |
| ENSG00000261076 | 5.13E-15 | -2.63127 | 1 | 1 RP11-179B15.6    | -      |
| ENSG00000261077 | 5.13E-15 | -2.63127 | 1 | 1 RP11-553E24.1    | K02882 |
| ENSG00000261078 | 5.13E-15 | -2.63127 | 1 | 1 RP11-481J2.1     | -      |
| ENSG00000261080 | 5.13E-15 | -2.63127 | 1 | 1 RP1-166H4.2      | -      |
| ENSG00000261081 | 5.13E-15 | -2.63127 | 1 | 1 RP11-1H8.1       | K04531 |
| ENSG00000261082 | 5.13E-15 | -2.63127 | 1 | 1 RP11-345M22.3    | -      |
| ENSG00000261083 | 5.13E-15 | -2.63127 | 1 | 1 RP11-93I21.3     | -      |
| ENSG00000261084 | 5.13E-15 | -2.63127 | 1 | 1 PPP1R1AP2        | -      |
| ENSG00000261086 | 5.13E-15 | -2.63127 | 1 | 1 RP11-379H8.1     | -      |
| ENSG00000261090 | 5.13E-15 | -2.63127 | 1 | 1 RP11-20G6.2      | -      |
| ENSG00000261093 | 5.13E-15 | -2.63127 | 1 | 1 CTD-3126B10.1    | -      |
| ENSG00000261095 | 5.13E-15 | -2.63127 | 1 | 1 RP11-899L11.1    | -      |
| ENSG00000261097 | 5.13E-15 | -2.63127 | 1 | 1 LINC00563        | -      |
| ENSG00000261101 | 5.13E-15 | -2.63127 | 1 | 1 RP4-545K15.5     | -      |
| ENSG00000261102 | 5.13E-15 | -2.63127 | 1 | 1 ATP5J2P6         | K02130 |
| ENSG00000261103 | 5.13E-15 | -2.63127 | 1 | 1 RP11-298D21.3    | -      |
| ENSG00000261104 | 5.13E-15 | -2.63127 | 1 | 1 RP11-734K21.5    | -      |
| ENSG00000261108 | 5.13E-15 | -2.63127 | 1 | 1 RP11-586K12.5    | K18172 |
| ENSG00000261111 | 5.13E-15 | -2.63127 | 1 | 1 RP11-96K14.1     | K01008 |
| ENSG00000261117 | 5.13E-15 | -2.63127 | 1 | 1 RP11-333O1.1     | -      |
| ENSG00000261120 | 5.13E-15 | -2.63127 | 1 | 1 RP11-62H20.1     | -      |
| ENSG00000261121 | 5.13E-15 | -2.63127 | 1 | 1 RP11-496D24.2    | -      |
| ENSG00000261127 | 5.13E-15 | -2.63127 | 1 | 1 RP11-17M15.2     | K11583 |
| ENSG00000261129 | 5.13E-15 | -2.63127 | 1 | 1 RP11-361D14.2    | -      |
| ENSG00000261130 | 5.13E-15 | -2.63127 | 1 | 1 RP11-1021N1.1    | K13349 |
| ENSG00000261135 | 5.13E-15 | -2.63127 | 1 | 1 RP4-798A10.7     | -      |

|                 |          |          |   |                 |        |
|-----------------|----------|----------|---|-----------------|--------|
| ENSG00000261144 | 5.13E-15 | -2.63127 | 1 | 1 RP11-102D18.1 | K15043 |
| ENSG00000261145 | 5.13E-15 | -2.63127 | 1 | 1 RP11-296I10.5 | K01047 |
| ENSG00000261146 | 5.13E-15 | -2.63127 | 1 | 1 RP11-2A4.4    | -      |
| ENSG00000261151 | 5.13E-15 | -2.63127 | 1 | 1 RP11-332G1.1  | K10904 |
| ENSG00000261153 | 5.13E-15 | -2.63127 | 1 | 1 RP11-104C4.2  | -      |
| ENSG00000261154 | 5.13E-15 | -2.63127 | 1 | 1 RP11-571O6.1  | -      |
| ENSG00000261158 | 5.13E-15 | -2.63127 | 1 | 1 CTD-2583P5.3  | -      |
| ENSG00000261161 | 5.13E-15 | -2.63127 | 1 | 1 RP11-58A18.1  | -      |
| ENSG00000261166 | 5.13E-15 | -2.63127 | 1 | 1 RP11-775H9.3  | -      |
| ENSG00000261170 | 5.13E-15 | -2.63127 | 1 | 1 RP11-252A24.5 | -      |
| ENSG00000261171 | 5.13E-15 | -2.63127 | 1 | 1 RP11-1136G4.1 | -      |
| ENSG00000261174 | 5.13E-15 | -2.63127 | 1 | 1 RP11-844G16.1 | K10802 |
| ENSG00000261175 | 5.13E-15 | -2.63127 | 1 | 1 CTD-2015G9.2  | -      |
| ENSG00000261176 | 5.13E-15 | -2.63127 | 1 | 1 RP11-2L4.1    | -      |
| ENSG00000261177 | 5.13E-15 | -2.63127 | 1 | 1 RP11-805I24.1 | -      |
| ENSG00000261178 | 5.13E-15 | -2.63127 | 1 | 1 RP11-90K18.1  | -      |
| ENSG00000261181 | 5.13E-15 | -2.63127 | 1 | 1 RP11-467M13.2 | K01047 |
| ENSG00000261182 | 5.13E-15 | -2.63127 | 1 | 1 RP11-201A3.1  | -      |
| ENSG00000261183 | 5.13E-15 | -2.63127 | 1 | 1 RP11-532F12.5 | -      |
| ENSG00000261184 | 5.13E-15 | -2.63127 | 1 | 1 RP11-196O2.1  | -      |
| ENSG00000261185 | 5.13E-15 | -2.63127 | 1 | 1 RP11-317P15.5 | -      |
| ENSG00000261190 | 5.13E-15 | -2.63127 | 1 | 1 C16orf97      | -      |
| ENSG00000261192 | 5.13E-15 | -2.63127 | 1 | 1 RNF126P1      | K11982 |
| ENSG00000261193 | 5.13E-15 | -2.63127 | 1 | 1 RP11-863P13.5 | -      |
| ENSG00000261194 | 5.13E-15 | -2.63127 | 1 | 1 RP11-704C2.1  | -      |
| ENSG00000261195 | 5.13E-15 | -2.63127 | 1 | 1 CTD-2380F24.1 | -      |
| ENSG00000261196 | 5.13E-15 | -2.63127 | 1 | 1 CYP4A43P      | -      |
| ENSG00000261197 | 5.13E-15 | -2.63127 | 1 | 1 RP11-598D12.2 | K14958 |
| ENSG00000261198 | 5.13E-15 | -2.63127 | 1 | 1 RP11-26O3.1   | -      |
| ENSG00000261199 | 5.13E-15 | -2.63127 | 1 | 1 UBE2FP2       | K10687 |
| ENSG00000261200 | 5.13E-15 | -2.63127 | 1 | 1 RP11-989E6.10 | -      |
| ENSG00000261203 | 5.13E-15 | -2.63127 | 1 | 1 RP11-347C12.8 | K01047 |
| ENSG00000261205 | 5.13E-15 | -2.63127 | 1 | 1 NIFKP4        | K14838 |
| ENSG00000261206 | 5.13E-15 | -2.63127 | 1 | 1 LINC00561     | -      |
| ENSG00000261208 | 5.13E-15 | -2.63127 | 1 | 1 RP11-452D12.1 | K14844 |
| ENSG00000261209 | 5.13E-15 | -2.63127 | 1 | 1 RP11-443K8.1  | -      |
| ENSG00000261210 | 5.13E-15 | -2.63127 | 1 | 1 CLEC19A       | -      |
| ENSG00000261212 | 5.13E-15 | -2.63127 | 1 | 1 RP3-507I15.2  | -      |
| ENSG00000261213 | 5.13E-15 | -2.63127 | 1 | 1 RP11-510C10.4 | -      |
| ENSG00000261217 | 5.13E-15 | -2.63127 | 1 | 1 RP11-598D12.3 | K14009 |
| ENSG00000261218 | 5.13E-15 | -2.63127 | 1 | 1 RP11-960L18.1 | -      |
| ENSG00000261219 | 5.13E-15 | -2.63127 | 1 | 1 RP11-344A16.2 | -      |
| ENSG00000261222 | 5.13E-15 | -2.63127 | 1 | 1 CTD-2006K23.1 | -      |
| ENSG00000261231 | 5.13E-15 | -2.63127 | 1 | 1 RP11-523L20.2 | -      |
| ENSG00000261232 | 5.13E-15 | -2.63127 | 1 | 1 RP11-331H13.1 | K11300 |
| ENSG00000261233 | 5.13E-15 | -2.63127 | 1 | 1 ABCD1P3       | K05675 |
| ENSG00000261234 | 5.13E-15 | -2.63127 | 1 | 1 RP11-356O24.1 | K02917 |
| ENSG00000261235 | 5.13E-15 | -2.63127 | 1 | 1 RP11-510J16.5 | -      |
| ENSG00000261238 | 5.13E-15 | -2.63127 | 1 | 1 AC009166.5    | -      |
| ENSG00000261239 | 5.13E-15 | -2.63127 | 1 | 1 ANKRD26P1     | K17299 |
| ENSG00000261241 | 5.13E-15 | -2.63127 | 1 | 1 RP11-883G14.1 | -      |
| ENSG00000261244 | 5.13E-15 | -2.63127 | 1 | 1 RP11-114H24.7 | -      |
| ENSG00000261245 | 5.13E-15 | -2.63127 | 1 | 1 RP11-120K18.3 | K06462 |
| ENSG00000261247 | 5.13E-15 | -2.63127 | 1 | 1 GOLGA8T       | K10595 |
| ENSG00000261248 | 5.13E-15 | -2.63127 | 1 | 1 AC009120.10   | -      |
| ENSG00000261249 | 5.13E-15 | -2.63127 | 1 | 1 RP11-19D2.2   | -      |
| ENSG00000261250 | 5.13E-15 | -2.63127 | 1 | 1 RP11-545A16.1 | -      |
| ENSG00000261257 | 5.13E-15 | -2.63127 | 1 | 1 RP11-673E11.2 | -      |

|                 |          |          |   |                    |        |
|-----------------|----------|----------|---|--------------------|--------|
| ENSG00000261259 | 5.13E-15 | -2.63127 | 1 | 1 RP11-19N8.2      | -      |
| ENSG00000261260 | 5.13E-15 | -2.63127 | 1 | 1 CTD-2520I13.1    | -      |
| ENSG00000261261 | 5.13E-15 | -2.63127 | 1 | 1 RP11-297L17.4    | -      |
| ENSG00000261263 | 5.13E-15 | -2.63127 | 1 | 1 RP11-586K12.13   | -      |
| ENSG00000261265 | 5.13E-15 | -2.63127 | 1 | 1 CTD-2515H24.4    | -      |
| ENSG00000261272 | 5.13E-15 | -2.63127 | 1 | 1 MUC22            | -      |
| ENSG00000261273 | 5.13E-15 | -2.63127 | 1 | 1 LA16c-444G7.1    | -      |
| ENSG00000261274 | 5.13E-15 | -2.63127 | 1 | 1 RP11-244B22.5    | -      |
| ENSG00000261275 | 5.13E-15 | -2.63127 | 1 | 1 RP11-760D2.11    | -      |
| ENSG00000261276 | 5.13E-15 | -2.63127 | 1 | 1 RP11-554A11.5    | -      |
| ENSG00000261277 | 5.13E-15 | -2.63127 | 1 | 1 OR4H6P           | K04257 |
| ENSG00000261278 | 5.13E-15 | -2.63127 | 1 | 1 RP11-430C1.2     | K14565 |
| ENSG00000261279 | 5.13E-15 | -2.63127 | 1 | 1 ULK4P1           | K17545 |
| ENSG00000261280 | 5.13E-15 | -2.63127 | 1 | 1 CTD-3105H18.13   | -      |
| ENSG00000261281 | 5.13E-15 | -2.63127 | 1 | 1 RP11-361M10.4    | K11098 |
| ENSG00000261282 | 5.13E-15 | -2.63127 | 1 | 1 SOD1P2           | K04565 |
| ENSG00000261284 | 5.13E-15 | -2.63127 | 1 | 1 RBM22P13         | K12872 |
| ENSG00000261285 | 5.13E-15 | -2.63127 | 1 | 1 RP11-481E4.2     | -      |
| ENSG00000261288 | 5.13E-15 | -2.63127 | 1 | 1 RP11-20I23.11    | -      |
| ENSG00000261289 | 5.13E-15 | -2.63127 | 1 | 1 RP11-170L3.5     | -      |
| ENSG00000261290 | 5.13E-15 | -2.63127 | 1 | 1 CYP4A44P         | -      |
| ENSG00000261292 | 5.13E-15 | -2.63127 | 1 | 1 RP11-389G6.3     | -      |
| ENSG00000261293 | 5.13E-15 | -2.63127 | 1 | 1 RP11-276H1.2     | -      |
| ENSG00000261294 | 5.13E-15 | -2.63127 | 1 | 1 RP11-616M22.3    | -      |
| ENSG00000261295 | 5.13E-15 | -2.63127 | 1 | 1 RP11-524D16__A.3 | -      |
| ENSG00000261296 | 5.13E-15 | -2.63127 | 1 | 1 RP11-299H22.6    | -      |
| ENSG00000261298 | 5.13E-15 | -2.63127 | 1 | 1 RP11-309M7.1     | -      |
| ENSG00000261299 | 5.13E-15 | -2.63127 | 1 | 1 RP11-80F22.11    | -      |
| ENSG00000261303 | 5.13E-15 | -2.63127 | 1 | 1 RP11-160C18.2    | -      |
| ENSG00000261304 | 5.13E-15 | -2.63127 | 1 | 1 CTD-2125J1.1     | -      |
| ENSG00000261307 | 5.13E-15 | -2.63127 | 1 | 1 RP11-157P23.2    | -      |
| ENSG00000261308 | 5.13E-15 | -2.63127 | 1 | 1 RP11-923I11.7    | -      |
| ENSG00000261310 | 5.13E-15 | -2.63127 | 1 | 1 RP11-354I13.1    | -      |
| ENSG00000261313 | 5.13E-15 | -2.63127 | 1 | 1 RP11-2C15.1      | -      |
| ENSG00000261314 | 5.13E-15 | -2.63127 | 1 | 1 RP11-359E8.5     | -      |
| ENSG00000261315 | 5.13E-15 | -2.63127 | 1 | 1 LARP4P           | K18763 |
| ENSG00000261316 | 5.13E-15 | -2.63127 | 1 | 1 CTC-400I9.1      | -      |
| ENSG00000261318 | 5.13E-15 | -2.63127 | 1 | 1 RP11-653J6.1     | -      |
| ENSG00000261319 | 5.13E-15 | -2.63127 | 1 | 1 RP11-279O17.1    | -      |
| ENSG00000261325 | 5.13E-15 | -2.63127 | 1 | 1 AC140542.2       | -      |
| ENSG00000261327 | 5.13E-15 | -2.63127 | 1 | 1 RP11-863P13.3    | -      |
| ENSG00000261329 | 5.13E-15 | -2.63127 | 1 | 1 CTD-2049O4.1     | -      |
| ENSG00000261330 | 5.13E-15 | -2.63127 | 1 | 1 RP11-281J9.1     | K03767 |
| ENSG00000261331 | 5.13E-15 | -2.63127 | 1 | 1 CTD-2144E22.7    | -      |
| ENSG00000261332 | 5.13E-15 | -2.63127 | 1 | 1 RP11-297C4.1     | -      |
| ENSG00000261333 | 5.13E-15 | -2.63127 | 1 | 1 CD24P2           | K06469 |
| ENSG00000261336 | 5.13E-15 | -2.63127 | 1 | 1 EIF4BP5          | K03258 |
| ENSG00000261340 | 5.13E-15 | -2.63127 | 1 | 1 RP11-215H22.1    | -      |
| ENSG00000261346 | 5.13E-15 | -2.63127 | 1 | 1 RP11-297C4.2     | -      |
| ENSG00000261347 | 5.13E-15 | -2.63127 | 1 | 1 AP000439.5       | -      |
| ENSG00000261348 | 5.13E-15 | -2.63127 | 1 | 1 RP11-510M2.1     | -      |
| ENSG00000261350 | 5.13E-15 | -2.63127 | 1 | 1 RP11-80F22.14    | -      |
| ENSG00000261356 | 5.13E-15 | -2.63127 | 1 | 1 RP11-46D6.5      | K07891 |
| ENSG00000261362 | 5.13E-15 | -2.63127 | 1 | 1 RP11-467M13.3    | -      |
| ENSG00000261363 | 5.13E-15 | -2.63127 | 1 | 1 RP11-134D3.2     | -      |
| ENSG00000261364 | 5.13E-15 | -2.63127 | 1 | 1 RP11-59E19.4     | -      |
| ENSG00000261365 | 5.13E-15 | -2.63127 | 1 | 1 RP11-483E23.5    | K08111 |
| ENSG00000261367 | 5.13E-15 | -2.63127 | 1 | 1 RP11-455F5.4     | -      |



|                 |          |          |   |                  |        |
|-----------------|----------|----------|---|------------------|--------|
| ENSG00000261368 | 5.13E-15 | -2.63127 | 1 | 1 RP11-96B5.4    | --     |
| ENSG00000261369 | 5.13E-15 | -2.63127 | 1 | 1 RP11-474B12.1  | --     |
| ENSG00000261374 | 5.13E-15 | -2.63127 | 1 | 1 RP11-64K12.10  | --     |
| ENSG00000261375 | 5.13E-15 | -2.63127 | 1 | 1 RP11-632K20.6  | --     |
| ENSG00000261376 | 5.13E-15 | -2.63127 | 1 | 1 RP11-525K10.2  | --     |
| ENSG00000261377 | 5.13E-15 | -2.63127 | 1 | 1 RP11-578F21.12 | K10595 |
| ENSG00000261379 | 5.13E-15 | -2.63127 | 1 | 1 RP11-395N3.1   | --     |
| ENSG00000261382 | 5.13E-15 | -2.63127 | 1 | 1 RP11-461L18.1  | --     |
| ENSG00000261384 | 5.13E-15 | -2.63127 | 1 | 1 RP11-60L3.2    | --     |
| ENSG00000261385 | 5.13E-15 | -2.63127 | 1 | 1 RP11-388M20.2  | --     |
| ENSG00000261390 | 5.13E-15 | -2.63127 | 1 | 1 RP11-345M22.2  | --     |
| ENSG00000261391 | 5.13E-15 | -2.63127 | 1 | 1 RP11-586K12.7  | K08111 |
| ENSG00000261393 | 5.13E-15 | -2.63127 | 1 | 1 RP11-21B23.1   | --     |
| ENSG00000261394 | 5.13E-15 | -2.63127 | 1 | 1 RP11-165M1.3   | --     |
| ENSG00000261395 | 5.13E-15 | -2.63127 | 1 | 1 HSPE1P5        | K04078 |
| ENSG00000261396 | 5.13E-15 | -2.63127 | 1 | 1 CTD-2012K14.2  | --     |
| ENSG00000261397 | 5.13E-15 | -2.63127 | 1 | 1 RP11-243A14.2  | --     |
| ENSG00000261398 | 5.13E-15 | -2.63127 | 1 | 1 RP11-244B22.6  | --     |
| ENSG00000261400 | 5.13E-15 | -2.63127 | 1 | 1 AC011525.2     | --     |
| ENSG00000261401 | 5.13E-15 | -2.63127 | 1 | 1 RP11-578F21.3  | K10595 |
| ENSG00000261402 | 5.13E-15 | -2.63127 | 1 | 1 RP11-378I6.1   | --     |
| ENSG00000261403 | 5.13E-15 | -2.63127 | 1 | 1 RP11-114H24.3  | --     |
| ENSG00000261404 | 5.13E-15 | -2.63127 | 1 | 1 AC009120.4     | --     |
| ENSG00000261405 | 5.13E-15 | -2.63127 | 1 | 1 RP11-23E10.4   | K06641 |
| ENSG00000261406 | 5.13E-15 | -2.63127 | 1 | 1 OR11J1P        | K04257 |
| ENSG00000261409 | 5.13E-15 | -2.63127 | 1 | 1 RP6-24A23.7    | --     |
| ENSG00000261410 | 5.13E-15 | -2.63127 | 1 | 1 RP11-543N12.1  | --     |
| ENSG00000261411 | 5.13E-15 | -2.63127 | 1 | 1 RP11-268G13.1  | --     |
| ENSG00000261416 | 5.13E-15 | -2.63127 | 1 | 1 RP11-455F5.5   | --     |
| ENSG00000261418 | 5.13E-15 | -2.63127 | 1 | 1 RP11-529J17.3  | K10595 |
| ENSG00000261419 | 5.13E-15 | -2.63127 | 1 | 1 RP11-57A19.4   | K01047 |
| ENSG00000261421 | 5.13E-15 | -2.63127 | 1 | 1 RP11-22D3.1    | --     |
| ENSG00000261424 | 5.13E-15 | -2.63127 | 1 | 1 ATP5F1P7       | K02127 |
| ENSG00000261425 | 5.13E-15 | -2.63127 | 1 | 1 RP11-709B3.2   | --     |
| ENSG00000261426 | 5.13E-15 | -2.63127 | 1 | 1 AC144833.1     | --     |
| ENSG00000261427 | 5.13E-15 | -2.63127 | 1 | 1 CTD-2349B8.1   | --     |
| ENSG00000261429 | 5.13E-15 | -2.63127 | 1 | 1 DPPA2P4        | --     |
| ENSG00000261432 | 5.13E-15 | -2.63127 | 1 | 1 RP11-360A18.2  | --     |
| ENSG00000261434 | 5.13E-15 | -2.63127 | 1 | 1 CTD-2083E4.7   | --     |
| ENSG00000261436 | 5.13E-15 | -2.63127 | 1 | 1 RP11-354I13.2  | --     |
| ENSG00000261437 | 5.13E-15 | -2.63127 | 1 | 1 RP11-22C11.2   | --     |
| ENSG00000261440 | 5.13E-15 | -2.63127 | 1 | 1 CTD-2522B17.5  | --     |
| ENSG00000261444 | 5.13E-15 | -2.63127 | 1 | 1 RP11-347C12.9  | K13349 |
| ENSG00000261445 | 5.13E-15 | -2.63127 | 1 | 1 RP11-80F22.4   | --     |
| ENSG00000261446 | 5.13E-15 | -2.63127 | 1 | 1 LINC00559      | --     |
| ENSG00000261447 | 5.13E-15 | -2.63127 | 1 | 1 RP11-109D9.4   | --     |
| ENSG00000261448 | 5.13E-15 | -2.63127 | 1 | 1 CTD-2576D5.4   | --     |
| ENSG00000261449 | 5.13E-15 | -2.63127 | 1 | 1 RP11-589C21.5  | --     |
| ENSG00000261451 | 5.13E-15 | -2.63127 | 1 | 1 RP11-981G7.1   | --     |
| ENSG00000261453 | 5.13E-15 | -2.63127 | 1 | 1 RP11-565N2.1   | --     |
| ENSG00000261458 | 5.13E-15 | -2.63127 | 1 | 1 RP11-787D11.1  | --     |
| ENSG00000261459 | 5.13E-15 | -2.63127 | 1 | 1 ZNF747         | K09228 |
| ENSG00000261462 | 5.13E-15 | -2.63127 | 1 | 1 CTA-254O6.1    | --     |
| ENSG00000261466 | 5.13E-15 | -2.63127 | 1 | 1 RP11-23E10.2   | --     |
| ENSG00000261467 | 5.13E-15 | -2.63127 | 1 | 1 RP11-731K22.1  | --     |
| ENSG00000261470 | 5.13E-15 | -2.63127 | 1 | 1 RP11-152O14.4  | --     |
| ENSG00000261472 | 5.13E-15 | -2.63127 | 1 | 1 RP11-467I17.1  | --     |
| ENSG00000261475 | 5.13E-15 | -2.63127 | 1 | 1 CTD-2014E2.6   | --     |

|                 |          |          |   |                  |        |
|-----------------|----------|----------|---|------------------|--------|
| ENSG00000261478 | 5.13E-15 | -2.63127 | 1 | 1 RP11-429B14.4  | -      |
| ENSG00000261480 | 5.13E-15 | -2.63127 | 1 | 1 RP11-578F21.6  | -      |
| ENSG00000261482 | 5.13E-15 | -2.63127 | 1 | 1 RP11-673P17.2  | -      |
| ENSG00000261486 | 5.13E-15 | -2.63127 | 1 | 1 RARRES2P9      | K10044 |
| ENSG00000261489 | 5.13E-15 | -2.63127 | 1 | 1 CTD-2515H24.3  | -      |
| ENSG00000261491 | 5.13E-15 | -2.63127 | 1 | 1 DNM1P31        | K01528 |
| ENSG00000261496 | 5.13E-15 | -2.63127 | 1 | 1 RP13-514E23.1  | -      |
| ENSG00000261497 | 5.13E-15 | -2.63127 | 1 | 1 RP11-483E23.3  | K14559 |
| ENSG00000261498 | 5.13E-15 | -2.63127 | 1 | 1 LINC00566      | -      |
| ENSG00000261501 | 5.13E-15 | -2.63127 | 1 | 1 RP11-63B13.1   | -      |
| ENSG00000261502 | 5.13E-15 | -2.63127 | 1 | 1 RP11-96H17.1   | -      |
| ENSG00000261504 | 5.13E-15 | -2.63127 | 1 | 1 RP11-317P15.4  | -      |
| ENSG00000261507 | 5.13E-15 | -2.63127 | 1 | 1 RP11-1437A8.6  | -      |
| ENSG00000261509 | 5.13E-15 | -2.63127 | 1 | 1 TP53TG3B       | -      |
| ENSG00000261510 | 5.13E-15 | -2.63127 | 1 | 1 RP11-244B22.13 | -      |
| ENSG00000261511 | 5.13E-15 | -2.63127 | 1 | 1 CTD-3244O18.7  | K17692 |
| ENSG00000261514 | 5.13E-15 | -2.63127 | 1 | 1 RP11-527L4.2   | -      |
| ENSG00000261515 | 5.13E-15 | -2.63127 | 1 | 1 VN1R70P        | K04614 |
| ENSG00000261517 | 5.13E-15 | -2.63127 | 1 | 1 LINC00558      | -      |
| ENSG00000261520 | 5.13E-15 | -2.63127 | 1 | 1 DLGAP1-AS5     | -      |
| ENSG00000261523 | 5.13E-15 | -2.63127 | 1 | 1 RP11-82O18.2   | -      |
| ENSG00000261527 | 5.13E-15 | -2.63127 | 1 | 1 RP11-343C2.10  | -      |
| ENSG00000261532 | 5.13E-15 | -2.63127 | 1 | 1 RP11-304L19.8  | -      |
| ENSG00000261536 | 5.13E-15 | -2.63127 | 1 | 1 FAM108A10P     | -      |
| ENSG00000261537 | 5.13E-15 | -2.63127 | 1 | 1 RP11-319G9.5   | -      |
| ENSG00000261538 | 5.13E-15 | -2.63127 | 1 | 1 RP11-3M1.1     | -      |
| ENSG00000261540 | 5.13E-15 | -2.63127 | 1 | 1 RP11-281J9.2   | -      |
| ENSG00000261541 | 5.13E-15 | -2.63127 | 1 | 1 RP11-626K17.3  | -      |
| ENSG00000261543 | 5.13E-15 | -2.63127 | 1 | 1 RP11-665J16.1  | -      |
| ENSG00000261544 | 5.13E-15 | -2.63127 | 1 | 1 RP11-16E23.3   | -      |
| ENSG00000261548 | 5.13E-15 | -2.63127 | 1 | 1 HLA-P          | K06751 |
| ENSG00000261549 | 5.13E-15 | -2.63127 | 1 | 1 RP11-320A16.1  | K10364 |
| ENSG00000261552 | 5.13E-15 | -2.63127 | 1 | 1 RP11-264B17.5  | -      |
| ENSG00000261554 | 5.13E-15 | -2.63127 | 1 | 1 RP11-810K23.10 | -      |
| ENSG00000261555 | 5.13E-15 | -2.63127 | 1 | 1 CTD-3229J4.1   | -      |
| ENSG00000261557 | 5.13E-15 | -2.63127 | 1 | 1 EEF1A1P38      | K03231 |
| ENSG00000261558 | 5.13E-15 | -2.63127 | 1 | 1 CTD-2291D10.2  | -      |
| ENSG00000261559 | 5.13E-15 | -2.63127 | 1 | 1 RP11-1H8.3     | K17455 |
| ENSG00000261561 | 5.13E-15 | -2.63127 | 1 | 1 RP11-536P16.2  | K04815 |
| ENSG00000261564 | 5.13E-15 | -2.63127 | 1 | 1 RP11-616M22.10 | K01340 |
| ENSG00000261569 | 5.13E-15 | -2.63127 | 1 | 1 RP11-586K12.11 | -      |
| ENSG00000261570 | 5.13E-15 | -2.63127 | 1 | 1 RP11-744I24.2  | -      |
| ENSG00000261572 | 5.13E-15 | -2.63127 | 1 | 1 RP11-384L8.1   | -      |
| ENSG00000261573 | 5.13E-15 | -2.63127 | 1 | 1 RP11-553K8.5   | -      |
| ENSG00000261580 | 5.13E-15 | -2.63127 | 1 | 1 ENPP7P13       | K12354 |
| ENSG00000261581 | 5.13E-15 | -2.63127 | 1 | 1 RP11-665A22.1  | K10595 |
| ENSG00000261583 | 5.13E-15 | -2.63127 | 1 | 1 CTD-2385L22.1  | -      |
| ENSG00000261584 | 5.13E-15 | -2.63127 | 1 | 1 RP11-457M11.5  | -      |
| ENSG00000261586 | 5.13E-15 | -2.63127 | 1 | 1 RP11-923I11.6  | -      |
| ENSG00000261588 | 5.13E-15 | -2.63127 | 1 | 1 AC002310.17    | K02928 |
| ENSG00000261590 | 5.13E-15 | -2.63127 | 1 | 1 RP11-457D20.1  | K00654 |
| ENSG00000261593 | 5.13E-15 | -2.63127 | 1 | 1 CYP4A27P       | K17687 |
| ENSG00000261594 | 5.13E-15 | -2.63127 | 1 | 1 TPBGL          | -      |
| ENSG00000261595 | 5.13E-15 | -2.63127 | 1 | 1 RP11-426L16.9  | -      |
| ENSG00000261598 | 5.13E-15 | -2.63127 | 1 | 1 RP11-107D24.2  | -      |
| ENSG00000261602 | 5.13E-15 | -2.63127 | 1 | 1 CTD-2033A16.1  | -      |
| ENSG00000261603 | 5.13E-15 | -2.63127 | 1 | 1 PRSS46         | -      |
| ENSG00000261606 | 5.13E-15 | -2.63127 | 1 | 1 RP11-414J4.2   | -      |

|                 |          |          |   |                  |        |
|-----------------|----------|----------|---|------------------|--------|
| ENSG00000261607 | 5.13E-15 | -2.63127 | 1 | 1 RP11-812E19.5  | —      |
| ENSG00000261608 | 5.13E-15 | -2.63127 | 1 | 1 SLC25A1P4      | K15100 |
| ENSG00000261611 | 5.13E-15 | -2.63127 | 1 | 1 AC010547.9     | K09228 |
| ENSG00000261612 | 5.13E-15 | -2.63127 | 1 | 1 SUB1P3         | —      |
| ENSG00000261615 | 5.13E-15 | -2.63127 | 1 | 1 CTD-2291D10.1  | —      |
| ENSG00000261617 | 5.13E-15 | -2.63127 | 1 | 1 RP11-243A14.1  | —      |
| ENSG00000261618 | 5.13E-15 | -2.63127 | 1 | 1 RP11-79H23.3   | —      |
| ENSG00000261621 | 5.13E-15 | -2.63127 | 1 | 1 RP11-580I1.2   | —      |
| ENSG00000261622 | 5.13E-15 | -2.63127 | 1 | 1 RP11-484P15.1  | —      |
| ENSG00000261623 | 5.13E-15 | -2.63127 | 1 | 1 RP11-189E14.4  | —      |
| ENSG00000261624 | 5.13E-15 | -2.63127 | 1 | 1 RP5-914M6.1    | —      |
| ENSG00000261625 | 5.13E-15 | -2.63127 | 1 | 1 RP11-554A11.4  | —      |
| ENSG00000261627 | 5.13E-15 | -2.63127 | 1 | 1 RP11-91I8.1    | —      |
| ENSG00000261628 | 5.13E-15 | -2.63127 | 1 | 1 RP11-540B6.3   | K14559 |
| ENSG00000261629 | 5.13E-15 | -2.63127 | 1 | 1 RP5-842K16.2   | —      |
| ENSG00000261630 | 5.13E-15 | -2.63127 | 1 | 1 RP11-357N13.3  | —      |
| ENSG00000261632 | 5.13E-15 | -2.63127 | 1 | 1 RP11-390D11.1  | —      |
| ENSG00000261633 | 5.13E-15 | -2.63127 | 1 | 1 RP11-405F3.5   | —      |
| ENSG00000261635 | 5.13E-15 | -2.63127 | 1 | 1 RP11-618N24.1  | K09290 |
| ENSG00000261636 | 5.13E-15 | -2.63127 | 1 | 1 CTA-249B10.1   | —      |
| ENSG00000261637 | 5.13E-15 | -2.63127 | 1 | 1 RP11-883G14.2  | —      |
| ENSG00000261638 | 5.13E-15 | -2.63127 | 1 | 1 RP11-700H13.1  | —      |
| ENSG00000261641 | 5.13E-15 | -2.63127 | 1 | 1 LA16c-390E6.5  | —      |
| ENSG00000261642 | 5.13E-15 | -2.63127 | 1 | 1 RP11-309H21.3  | —      |
| ENSG00000261645 | 5.13E-15 | -2.63127 | 1 | 1 DISC1FP1       | —      |
| ENSG00000261646 | 5.13E-15 | -2.63127 | 1 | 1 RP11-489G11.3  | —      |
| ENSG00000261647 | 5.13E-15 | -2.63127 | 1 | 1 IMPDH1P11      | K00088 |
| ENSG00000261648 | 5.13E-15 | -2.63127 | 1 | 1 CTD-2014E2.2   | —      |
| ENSG00000261649 | 5.13E-15 | -2.63127 | 1 | 1 GOLGA6L7P      | —      |
| ENSG00000261650 | 5.13E-15 | -2.63127 | 1 | 1 RP11-474D1.4   | —      |
| ENSG00000261651 | 5.13E-15 | -2.63127 | 1 | 1 RP11-899L11.3  | —      |
| ENSG00000261653 | 5.13E-15 | -2.63127 | 1 | 1 RP11-21L1.1    | —      |
| ENSG00000261664 | 5.13E-15 | -2.63127 | 1 | 1 RP11-275F13.1  | —      |
| ENSG00000261665 | 5.13E-15 | -2.63127 | 1 | 1 TUBA8P2        | K07374 |
| ENSG00000261666 | 5.13E-15 | -2.63127 | 1 | 1 LINC00560      | —      |
| ENSG00000261667 | 5.13E-15 | -2.63127 | 1 | 1 RP11-520P18.5  | —      |
| ENSG00000261670 | 5.13E-15 | -2.63127 | 1 | 1 RP11-1C8.5     | —      |
| ENSG00000261671 | 5.13E-15 | -2.63127 | 1 | 1 RP11-573G6.6   | —      |
| ENSG00000261672 | 5.13E-15 | -2.63127 | 1 | 1 RP11-475B2.1   | —      |
| ENSG00000261675 | 5.13E-15 | -2.63127 | 1 | 1 RP5-1119A7.17  | —      |
| ENSG00000261679 | 5.13E-15 | -2.63127 | 1 | 1 ATP5HP1        | K02138 |
| ENSG00000261680 | 5.13E-15 | -2.63127 | 1 | 1 RP11-146F11.3  | —      |
| ENSG00000261682 | 5.13E-15 | -2.63127 | 1 | 1 RP11-19N8.7    | —      |
| ENSG00000261683 | 5.13E-15 | -2.63127 | 1 | 1 LINC00838      | —      |
| ENSG00000261684 | 5.13E-15 | -2.63127 | 1 | 1 RP11-265N6.1   | —      |
| ENSG00000261685 | 5.13E-15 | -2.63127 | 1 | 1 RP11-401P9.4   | —      |
| ENSG00000261689 | 5.13E-15 | -2.63127 | 1 | 1 AGGF1P4        | —      |
| ENSG00000261691 | 5.13E-15 | -2.63127 | 1 | 1 LA16c-366D1.3  | —      |
| ENSG00000261692 | 5.13E-15 | -2.63127 | 1 | 1 RP1-168P16.1   | —      |
| ENSG00000261693 | 5.13E-15 | -2.63127 | 1 | 1 RP13-467H17.1  | —      |
| ENSG00000261695 | 5.13E-15 | -2.63127 | 1 | 1 RP11-719K4.6   | —      |
| ENSG00000261696 | 5.13E-15 | -2.63127 | 1 | 1 RP11-354P17.15 | —      |
| ENSG00000261697 | 5.13E-15 | -2.63127 | 1 | 1 RP11-178L8.5   | —      |
| ENSG00000261701 | 5.13E-15 | -2.63127 | 1 | 1 HPR            | K14477 |
| ENSG00000261702 | 5.13E-15 | -2.63127 | 1 | 1 RP11-282M16.1  | K02957 |
| ENSG00000261703 | 5.13E-15 | -2.63127 | 1 | 1 RP11-327F22.5  | —      |
| ENSG00000261704 | 5.13E-15 | -2.63127 | 1 | 1 IGHV1OR16-1    | —      |
| ENSG00000261708 | 5.13E-15 | -2.63127 | 1 | 1 DNM1P32        | K01528 |

|                 |          |          |   |                  |        |
|-----------------|----------|----------|---|------------------|--------|
| ENSG00000261709 | 5.13E-15 | -2.63127 | 1 | 1 SNORA11        | --     |
| ENSG00000261710 | 5.13E-15 | -2.63127 | 1 | 1 RP11-953B20.1  | --     |
| ENSG00000261711 | 5.13E-15 | -2.63127 | 1 | 1 RP11-80F22.9   | --     |
| ENSG00000261714 | 5.13E-15 | -2.63127 | 1 | 1 CTD-2562G15.2  | K11300 |
| ENSG00000261715 | 5.13E-15 | -2.63127 | 1 | 1 RP11-653G8.2   | --     |
| ENSG00000261716 | 5.13E-15 | -2.63127 | 1 | 1 RP11-196G18.22 | --     |
| ENSG00000261717 | 5.13E-15 | -2.63127 | 1 | 1 RP11-77K12.1   | --     |
| ENSG00000261719 | 5.13E-15 | -2.63127 | 1 | 1 RP11-67H24.1   | K14958 |
| ENSG00000261720 | 5.13E-15 | -2.63127 | 1 | 1 RP11-161M6.5   | --     |
| ENSG00000261722 | 5.13E-15 | -2.63127 | 1 | 1 RP11-679B19.2  | --     |
| ENSG00000261725 | 5.13E-15 | -2.63127 | 1 | 1 RP11-480G7.3   | --     |
| ENSG00000261727 | 5.13E-15 | -2.63127 | 1 | 1 RP11-1166P10.6 | K14958 |
| ENSG00000261728 | 5.13E-15 | -2.63127 | 1 | 1 RP11-307O13.1  | --     |
| ENSG00000261733 | 5.13E-15 | -2.63127 | 1 | 1 RP11-80F22.8   | --     |
| ENSG00000261734 | 5.13E-15 | -2.63127 | 1 | 1 RP11-669C19.1  | --     |
| ENSG00000261736 | 5.13E-15 | -2.63127 | 1 | 1 AC002551.1     | --     |
| ENSG00000261738 | 5.13E-15 | -2.63127 | 1 | 1 RP11-945C19.1  | --     |
| ENSG00000261739 | 5.13E-15 | -2.63127 | 1 | 1 GOLGA8S        | K10595 |
| ENSG00000261741 | 5.13E-15 | -2.63127 | 1 | 1 CTD-2014E2.5   | --     |
| ENSG00000261742 | 5.13E-15 | -2.63127 | 1 | 1 LINC00922      | --     |
| ENSG00000261743 | 5.13E-15 | -2.63127 | 1 | 1 RP11-2K6.2     | --     |
| ENSG00000261745 | 5.13E-15 | -2.63127 | 1 | 1 RP11-506E9.3   | --     |
| ENSG00000261747 | 5.13E-15 | -2.63127 | 1 | 1 RP11-932O9.3   | --     |
| ENSG00000261748 | 5.13E-15 | -2.63127 | 1 | 1 RP11-419L9.1   | --     |
| ENSG00000261749 | 5.13E-15 | -2.63127 | 1 | 1 RP11-152O14.1  | --     |
| ENSG00000261751 | 5.13E-15 | -2.63127 | 1 | 1 RP11-305A4.3   | --     |
| ENSG00000261752 | 5.13E-15 | -2.63127 | 1 | 1 RP11-244B22.1  | --     |
| ENSG00000261754 | 5.13E-15 | -2.63127 | 1 | 1 CTC-523E23.1   | --     |
| ENSG00000261757 | 5.13E-15 | -2.63127 | 1 | 1 AC005592.3     | --     |
| ENSG00000261758 | 5.13E-15 | -2.63127 | 1 | 1 RP11-102M11.2  | --     |
| ENSG00000261760 | 5.13E-15 | -2.63127 | 1 | 1 RP11-1223D19.1 | --     |
| ENSG00000261763 | 5.13E-15 | -2.63127 | 1 | 1 RP11-442N1.2   | --     |
| ENSG00000261764 | 5.13E-15 | -2.63127 | 1 | 1 KRT18P18       | K07604 |
| ENSG00000261765 | 5.13E-15 | -2.63127 | 1 | 1 RP11-498D10.3  | --     |
| ENSG00000261771 | 5.13E-15 | -2.63127 | 1 | 1 DYX1C1-CCPG1   | --     |
| ENSG00000261776 | 5.13E-15 | -2.63127 | 1 | 1 RP11-358L22.2  | K00272 |
| ENSG00000261778 | 5.13E-15 | -2.63127 | 1 | 1 RP5-1173P7.1   | --     |
| ENSG00000261779 | 5.13E-15 | -2.63127 | 1 | 1 RP11-69H7.3    | --     |
| ENSG00000261781 | 5.13E-15 | -2.63127 | 1 | 1 RP11-174G17.2  | --     |
| ENSG00000261782 | 5.13E-15 | -2.63127 | 1 | 1 RP11-43P5.1    | K17908 |
| ENSG00000261786 | 5.13E-15 | -2.63127 | 1 | 1 RP4-555D20.2   | --     |
| ENSG00000261787 | 5.13E-15 | -2.63127 | 1 | 1 TCF24          | K09072 |
| ENSG00000261792 | 5.13E-15 | -2.63127 | 1 | 1 DNMI1P28       | K01528 |
| ENSG00000261793 | 5.13E-15 | -2.63127 | 1 | 1 RP11-350O14.18 | --     |
| ENSG00000261795 | 5.13E-15 | -2.63127 | 1 | 1 RP11-90P13.1   | --     |
| ENSG00000261797 | 5.13E-15 | -2.63127 | 1 | 1 RP11-744I24.3  | --     |
| ENSG00000261800 | 5.13E-15 | -2.63127 | 1 | 1 RP11-244B22.11 | --     |
| ENSG00000261802 | 5.13E-15 | -2.63127 | 1 | 1 RP11-44I10.6   | --     |
| ENSG00000261804 | 5.13E-15 | -2.63127 | 1 | 1 RP11-44F14.2   | --     |
| ENSG00000261807 | 5.13E-15 | -2.63127 | 1 | 1 RP11-430C1.1   | --     |
| ENSG00000261809 | 5.13E-15 | -2.63127 | 1 | 1 CYP3A54P       | --     |
| ENSG00000261810 | 5.13E-15 | -2.63127 | 1 | 1 RP11-895K13.2  | --     |
| ENSG00000261811 | 5.13E-15 | -2.63127 | 1 | 1 RP11-382N13.2  | --     |
| ENSG00000261812 | 5.13E-15 | -2.63127 | 1 | 1 TUBB8P7        | K07375 |
| ENSG00000261813 | 5.13E-15 | -2.63127 | 1 | 1 RP11-151H2.3   | K02877 |
| ENSG00000261815 | 5.13E-15 | -2.63127 | 1 | 1 RP11-22D3.2    | --     |
| ENSG00000261816 | 5.13E-15 | -2.63127 | 1 | 1 RP11-863P13.2  | --     |
| ENSG00000261817 | 5.13E-15 | -2.63127 | 1 | 1 RP11-502H18.2  | --     |

|                 |          |          |   |                  |        |
|-----------------|----------|----------|---|------------------|--------|
| ENSG00000261818 | 5.13E-15 | -2.63127 | 1 | 1 RP11-351A20.1  | -      |
| ENSG00000261820 | 5.13E-15 | -2.63127 | 1 | 1 DNM1P49        | K01528 |
| ENSG00000261822 | 5.13E-15 | -2.63127 | 1 | 1 RP11-265N6.2   | -      |
| ENSG00000261823 | 5.13E-15 | -2.63127 | 1 | 1 RP11-48G14.1   | -      |
| ENSG00000261826 | 5.13E-15 | -2.63127 | 1 | 1 RP11-691G17.1  | -      |
| ENSG00000261829 | 5.13E-15 | -2.63127 | 1 | 1 RP11-223I10.1  | -      |
| ENSG00000261831 | 5.13E-15 | -2.63127 | 1 | 1 RP11-533E19.2  | -      |
| ENSG00000261832 | 5.13E-15 | -2.63127 | 1 | 1 CLN3           | K12389 |
| ENSG00000261833 | 5.13E-15 | -2.63127 | 1 | 1 RP11-58C22.1   | -      |
| ENSG00000261834 | 5.13E-15 | -2.63127 | 1 | 1 IGHV3OR16-15   | K06856 |
| ENSG00000261835 | 5.13E-15 | -2.63127 | 1 | 1 RP11-429P3.2   | K15559 |
| ENSG00000261836 | 5.13E-15 | -2.63127 | 1 | 1 RP11-244B22.12 | -      |
| ENSG00000261837 | 5.13E-15 | -2.63127 | 1 | 1 RP11-264L1.3   | -      |
| ENSG00000261838 | 5.13E-15 | -2.63127 | 1 | 1 RP11-303E16.6  | -      |
| ENSG00000261841 | 5.13E-15 | -2.63127 | 1 | 1 RP11-928F19.5  | -      |
| ENSG00000261842 | 5.13E-15 | -2.63127 | 1 | 1 RP11-143I21.1  | -      |
| ENSG00000261845 | 5.13E-15 | -2.63127 | 1 | 1 RP13-638C3.4   | -      |
| ENSG00000261848 | 5.13E-15 | -2.63127 | 1 | 1 CTD-2309O5.3   | -      |
| ENSG00000261856 | 5.13E-15 | -2.63127 | 1 | 1 CTD-2135D7.4   | -      |
| ENSG00000261857 | 5.13E-15 | -2.63127 | 1 | 1 MIA            | K16655 |
| ENSG00000261863 | 5.13E-15 | -2.63127 | 1 | 1 RP11-141J13.5  | -      |
| ENSG00000261866 | 5.13E-15 | -2.63127 | 1 | 1 AC092566.1     | -      |
| ENSG00000261873 | 5.13E-15 | -2.63127 | 1 | 1 RP11-515E23.1  | -      |
| ENSG00000261882 | 5.13E-15 | -2.63127 | 1 | 1 RP11-502F1.2   | K01110 |
| ENSG00000261904 | 5.13E-15 | -2.63127 | 1 | 1 RP11-109M19.3  | K03883 |
| ENSG00000261934 | 5.13E-15 | -2.63127 | 1 | 1 PCDHGA9        | K16495 |
| ENSG00000261938 | 5.13E-15 | -2.63127 | 1 | 1 RP11-461A8.1   | -      |
| ENSG00000261939 | 5.13E-15 | -2.63127 | 1 | 1 CTC-496I23.1   | -      |
| ENSG00000261962 | 5.13E-15 | -2.63127 | 1 | 1 AC009133.20    | -      |
| ENSG00000261965 | 5.13E-15 | -2.63127 | 1 | 1 ISCA1P3        | K13628 |
| ENSG00000261970 | 5.13E-15 | -2.63127 | 1 | 1 RP11-342L8.2   | -      |
| ENSG00000261976 | 5.13E-15 | -2.63127 | 1 | 1 RP11-506D12.5  | -      |
| ENSG00000261978 | 5.13E-15 | -2.63127 | 1 | 1 CTD-2529O21.2  | -      |
| ENSG00000261987 | 5.13E-15 | -2.63127 | 1 | 1 KYNUP1         | K01556 |
| ENSG00000261996 | 5.13E-15 | -2.63127 | 1 | 1 CTC-281F24.1   | -      |
| ENSG00000262000 | 5.13E-15 | -2.63127 | 1 | 1 CTD-2526A2.5   | K03515 |
| ENSG00000262008 | 5.13E-15 | -2.63127 | 1 | 1 RP11-510M2.8   | -      |
| ENSG00000262011 | 5.13E-15 | -2.63127 | 1 | 1 AC003009.1     | -      |
| ENSG00000262020 | 5.13E-15 | -2.63127 | 1 | 1 RP11-66H6.3    | -      |
| ENSG00000262031 | 5.13E-15 | -2.63127 | 1 | 1 RP11-63A1.2    | -      |
| ENSG00000262038 | 5.13E-15 | -2.63127 | 1 | 1 RP11-177N22.3  | -      |
| ENSG00000262039 | 5.13E-15 | -2.63127 | 1 | 1 RP11-81K2.1    | K09654 |
| ENSG00000262048 | 5.13E-15 | -2.63127 | 1 | 1 RP1-232L24.4   | -      |
| ENSG00000262061 | 5.13E-15 | -2.63127 | 1 | 1 RP11-1260E13.4 | -      |
| ENSG00000262067 | 5.13E-15 | -2.63127 | 1 | 1 CTD-2545G14.2  | K04438 |
| ENSG00000262074 | 5.13E-15 | -2.63127 | 1 | 1 SNORD3B-2      | -      |
| ENSG00000262079 | 5.13E-15 | -2.63127 | 1 | 1 RP11-515O17.3  | -      |
| ENSG00000262081 | 5.13E-15 | -2.63127 | 1 | 1 IL9RP4         | K05073 |
| ENSG00000262085 | 5.13E-15 | -2.63127 | 1 | 1 OR1P1          | K04257 |
| ENSG00000262090 | 5.13E-15 | -2.63127 | 1 | 1 RP11-23E10.5   | K11583 |
| ENSG00000262095 | 5.13E-15 | -2.63127 | 1 | 1 RP3-433F14.4   | -      |
| ENSG00000262096 | 5.13E-15 | -2.63127 | 1 | 1 PCDHB19P       | K16494 |
| ENSG00000262097 | 5.13E-15 | -2.63127 | 1 | 1 CTD-2135D7.5   | -      |
| ENSG00000262099 | 5.13E-15 | -2.63127 | 1 | 1 CTC-524C5.5    | -      |
| ENSG00000262106 | 5.13E-15 | -2.63127 | 1 | 1 OR1D3P         | K04257 |
| ENSG00000262107 | 5.13E-15 | -2.63127 | 1 | 1 RP11-109M19.5  | -      |
| ENSG00000262112 | 5.13E-15 | -2.63127 | 1 | 1 RP11-670E13.5  | -      |
| ENSG00000262116 | 5.13E-15 | -2.63127 | 1 | 1 AC009134.1     | -      |

|                 |          |          |   |                   |        |
|-----------------|----------|----------|---|-------------------|--------|
| ENSG00000262117 | 5.13E-15 | -2.63127 | 1 | 1 BCAR4           | -      |
| ENSG00000262118 | 5.13E-15 | -2.63127 | 1 | 1 RP11-433P17.3   | K02256 |
| ENSG00000262119 | 5.13E-15 | -2.63127 | 1 | 1 RP11-483C6.1    | -      |
| ENSG00000262120 | 5.13E-15 | -2.63127 | 1 | 1 RP11-510M2.7    | K02929 |
| ENSG00000262135 | 5.13E-15 | -2.63127 | 1 | 1 CTD-2033D24.1   | K01880 |
| ENSG00000262140 | 5.13E-15 | -2.63127 | 1 | 1 RP11-417N10.3   | K12003 |
| ENSG00000262141 | 5.13E-15 | -2.63127 | 1 | 1 CTC-479C5.11    | K02949 |
| ENSG00000262151 | 5.13E-15 | -2.63127 | 1 | 1 RP11-876N24.2   | -      |
| ENSG00000262158 | 5.13E-15 | -2.63127 | 1 | 1 CTD-2318B16.2   | -      |
| ENSG00000262160 | 5.13E-15 | -2.63127 | 1 | 1 RP11-96D1.11    | -      |
| ENSG00000262171 | 5.13E-15 | -2.63127 | 1 | 1 CTA-972D3.2     | -      |
| ENSG00000262181 | 5.13E-15 | -2.63127 | 1 | 1 RP11-683L23.2   | -      |
| ENSG00000262187 | 5.13E-15 | -2.63127 | 1 | 1 RP11-652G5.2    | K16725 |
| ENSG00000262198 | 5.13E-15 | -2.63127 | 1 | 1 RP11-124N19.3   | -      |
| ENSG00000262209 | 5.13E-15 | -2.63127 | 1 | 1 PCDHGB3         | K16496 |
| ENSG00000262211 | 5.13E-15 | -2.63127 | 1 | 1 CTD-2031P19.5   | -      |
| ENSG00000262213 | 5.13E-15 | -2.63127 | 1 | 1 AC144836.1      | -      |
| ENSG00000262228 | 5.13E-15 | -2.63127 | 1 | 1 RP11-676J12.4   | -      |
| ENSG00000262231 | 5.13E-15 | -2.63127 | 1 | 1 RP11-960B9.2    | -      |
| ENSG00000262235 | 5.13E-15 | -2.63127 | 1 | 1 AC003009.2      | -      |
| ENSG00000262259 | 5.13E-15 | -2.63127 | 1 | 1 CTD-2318B16.4   | -      |
| ENSG00000262262 | 5.13E-15 | -2.63127 | 1 | 1 RP11-815I9.3    | -      |
| ENSG00000262265 | 5.13E-15 | -2.63127 | 1 | 1 RP5-867C24.4    | -      |
| ENSG00000262267 | 5.13E-15 | -2.63127 | 1 | 1 U95743.1        | -      |
| ENSG00000262271 | 5.13E-15 | -2.63127 | 1 | 1 CTD-2535P7.1    | K13711 |
| ENSG00000262292 | 5.13E-15 | -2.63127 | 1 | 1 RP11-160E2.11   | -      |
| ENSG00000262294 | 5.13E-15 | -2.63127 | 1 | 1 RP11-1260E13.2  | -      |
| ENSG00000262302 | 5.13E-15 | -2.63127 | 1 | 1 RP1-4G17.5      | K06087 |
| ENSG00000262312 | 5.13E-15 | -2.63127 | 1 | 1 LA16c-390H2.4   | -      |
| ENSG00000262313 | 5.13E-15 | -2.63127 | 1 | 1 CTD-2561B21.4   | -      |
| ENSG00000262316 | 5.13E-15 | -2.63127 | 1 | 1 RP11-433P17.1   | -      |
| ENSG00000262319 | 5.13E-15 | -2.63127 | 1 | 1 CTC-457L16.2    | -      |
| ENSG00000262322 | 5.13E-15 | -2.63127 | 1 | 1 RP11-109M19.2   | -      |
| ENSG00000262339 | 5.13E-15 | -2.63127 | 1 | 1 RP11-1197K16.2  | -      |
| ENSG00000262343 | 5.13E-15 | -2.63127 | 1 | 1 RP11-353N14.3   | -      |
| ENSG00000262352 | 5.13E-15 | -2.63127 | 1 | 1 AP005530.1      | -      |
| ENSG00000262366 | 5.13E-15 | -2.63127 | 1 | 1 NDUFA3P6        | K03947 |
| ENSG00000262381 | 5.13E-15 | -2.63127 | 1 | 1 CTD-2318B16.1   | K02126 |
| ENSG00000262384 | 5.13E-15 | -2.63127 | 1 | 1 RP11-312B18.1   | K03064 |
| ENSG00000262395 | 5.13E-15 | -2.63127 | 1 | 1 RP11-515E23.2   | -      |
| ENSG00000262400 | 5.13E-15 | -2.63127 | 1 | 1 RP11-191A15.1   | K12304 |
| ENSG00000262402 | 5.13E-15 | -2.63127 | 1 | 1 RP11-667K14.8   | -      |
| ENSG00000262408 | 5.13E-15 | -2.63127 | 1 | 1 RP11-670E13.3   | -      |
| ENSG00000262413 | 5.13E-15 | -2.63127 | 1 | 1 RP11-498C9.3    | -      |
| ENSG00000262445 | 5.13E-15 | -2.63127 | 1 | 1 CTD-2545H1.2    | -      |
| ENSG00000262456 | 5.13E-15 | -2.63127 | 1 | 1 RP1-59D14.1     | -      |
| ENSG00000262470 | 5.13E-15 | -2.63127 | 1 | 1 TVP23CP2        | -      |
| ENSG00000262481 | 5.13E-15 | -2.63127 | 1 | 1 C17orf61-PLSCR3 | -      |
| ENSG00000262492 | 5.13E-15 | -2.63127 | 1 | 1 RP11-1099M24.8  | K02889 |
| ENSG00000262495 | 5.13E-15 | -2.63127 | 1 | 1 RP11-46I8.1     | -      |
| ENSG00000262500 | 5.13E-15 | -2.63127 | 1 | 1 RP11-259G18.2   | K04434 |
| ENSG00000262503 | 5.13E-15 | -2.63127 | 1 | 1 RP11-530N7.2    | K09440 |
| ENSG00000262516 | 5.13E-15 | -2.63127 | 1 | 1 RP11-95J11.1    | -      |
| ENSG00000262518 | 5.13E-15 | -2.63127 | 1 | 1 CTD-2535P7.2    | -      |
| ENSG00000262529 | 5.13E-15 | -2.63127 | 1 | 1 CTA-276F8.2     | -      |
| ENSG00000262533 | 5.13E-15 | -2.63127 | 1 | 1 RP11-667K14.4   | -      |
| ENSG00000262539 | 5.13E-15 | -2.63127 | 1 | 1 RP11-259G18.3   | -      |
| ENSG00000262543 | 5.13E-15 | -2.63127 | 1 | 1 RP3-422G23.4    | -      |

|                 |          |          |   |                  |        |
|-----------------|----------|----------|---|------------------|--------|
| ENSG00000262554 | 5.13E-15 | -2.63127 | 1 | 1 LA16c-360H6.2  | K09229 |
| ENSG00000262558 | 5.13E-15 | -2.63127 | 1 | 1 RP11-1260E13.3 | -      |
| ENSG00000262560 | 5.13E-15 | -2.63127 | 1 | 1 RP11-296A16.1  | K15183 |
| ENSG00000262561 | 5.13E-15 | -2.63127 | 1 | 1 CTD-2522B17.8  | -      |
| ENSG00000262566 | 5.13E-15 | -2.63127 | 1 | 1 RP11-448N11.3  | -      |
| ENSG00000262576 | 5.13E-15 | -2.63127 | 1 | 1 PCDHGA4        | K16495 |
| ENSG00000262609 | 5.13E-15 | -2.63127 | 1 | 1 BTF3P14        | K01527 |
| ENSG00000262619 | 5.13E-15 | -2.63127 | 1 | 1 LINC00621      | -      |
| ENSG00000262621 | 5.13E-15 | -2.63127 | 1 | 1 NAA60          | -      |
| ENSG00000262624 | 5.13E-15 | -2.63127 | 1 | 1 RP11-104H15.9  | -      |
| ENSG00000262628 | 5.13E-15 | -2.63127 | 1 | 1 OR1D5          | K04257 |
| ENSG00000262633 | 5.13E-15 | -2.63127 | 1 | 1 RP11-156P1.2   | K08496 |
| ENSG00000262651 | 5.13E-15 | -2.63127 | 1 | 1 RP11-164N20.2  | K02993 |
| ENSG00000262660 | 5.13E-15 | -2.63127 | 1 | 1 SLC25A10       | K13577 |
| ENSG00000262664 | 5.13E-15 | -2.63127 | 1 | 1 OVCA2          | K07561 |
| ENSG00000262670 | 5.13E-15 | -2.63127 | 1 | 1 RP11-64J4.2    | -      |
| ENSG00000262693 | 5.13E-15 | -2.63127 | 1 | 1 RP11-46I8.3    | -      |
| ENSG00000262700 | 5.13E-15 | -2.63127 | 1 | 1 RP11-266L9.3   | -      |
| ENSG00000262708 | 5.13E-15 | -2.63127 | 1 | 1 RP11-411G7.2   | -      |
| ENSG00000262714 | 5.13E-15 | -2.63127 | 1 | 1 RP11-44F14.8   | -      |
| ENSG00000262721 | 5.13E-15 | -2.63127 | 1 | 1 AC106782.20    | -      |
| ENSG00000262745 | 5.13E-15 | -2.63127 | 1 | 1 CTD-2377D24.8  | -      |
| ENSG00000262756 | 5.13E-15 | -2.63127 | 1 | 1 AC009133.21    | -      |
| ENSG00000262769 | 5.13E-15 | -2.63127 | 1 | 1 RP11-1113L8.1  | -      |
| ENSG00000262786 | 5.13E-15 | -2.63127 | 1 | 1 RP11-214O1.1   | -      |
| ENSG00000262791 | 5.13E-15 | -2.63127 | 1 | 1 RP11-961A15.1  | -      |
| ENSG00000262801 | 5.13E-15 | -2.63127 | 1 | 1 U91319.1       | -      |
| ENSG00000262803 | 5.13E-15 | -2.63127 | 1 | 1 RP11-160A9.3   | -      |
| ENSG00000262815 | 5.13E-15 | -2.63127 | 1 | 1 RP11-565F19.4  | -      |
| ENSG00000262818 | 5.13E-15 | -2.63127 | 1 | 1 RP11-636N17.1  | K19526 |
| ENSG00000262823 | 5.13E-15 | -2.63127 | 1 | 1 RP13-580F15.2  | -      |
| ENSG00000262828 | 5.13E-15 | -2.63127 | 1 | 1 RP11-325M4.2   | -      |
| ENSG00000262831 | 5.13E-15 | -2.63127 | 1 | 1 RP11-498C9.2   | -      |
| ENSG00000262848 | 5.13E-15 | -2.63127 | 1 | 1 RP11-517A5.5   | -      |
| ENSG00000262855 | 5.13E-15 | -2.63127 | 1 | 1 RP11-46I8.4    | -      |
| ENSG00000262869 | 5.13E-15 | -2.63127 | 1 | 1 CTD-2545H1.1   | -      |
| ENSG00000262873 | 5.13E-15 | -2.63127 | 1 | 1 CTD-2561B21.11 | -      |
| ENSG00000262880 | 5.13E-15 | -2.63127 | 1 | 1 RP11-104H15.7  | -      |
| ENSG00000262881 | 5.13E-15 | -2.63127 | 1 | 1 RP11-669E14.4  | -      |
| ENSG00000262884 | 5.13E-15 | -2.63127 | 1 | 1 CTD-3060P21.1  | -      |
| ENSG00000262885 | 5.13E-15 | -2.63127 | 1 | 1 CTD-2144E22.11 | -      |
| ENSG00000262890 | 5.13E-15 | -2.63127 | 1 | 1 RP11-424M24.5  | -      |
| ENSG00000262898 | 5.13E-15 | -2.63127 | 1 | 1 AC139099.4     | -      |
| ENSG00000262899 | 5.13E-15 | -2.63127 | 1 | 1 LA16c-360H6.3  | -      |
| ENSG00000262902 | 5.13E-15 | -2.63127 | 1 | 1 RP11-750B16.1  | K02256 |
| ENSG00000262920 | 5.13E-15 | -2.63127 | 1 | 1 RP11-1260E13.1 | -      |
| ENSG00000262921 | 5.13E-15 | -2.63127 | 1 | 1 RP11-141J13.3  | -      |
| ENSG00000262950 | 5.13E-15 | -2.63127 | 1 | 1 RP11-189E14.5  | -      |
| ENSG00000262952 | 5.13E-15 | -2.63127 | 1 | 1 AC139099.6     | -      |
| ENSG00000262953 | 5.13E-15 | -2.63127 | 1 | 1 EIF4A1P9       | K03257 |
| ENSG00000262959 | 5.13E-15 | -2.63127 | 1 | 1 LA16c-321D4.1  | K02893 |
| ENSG00000262961 | 5.13E-15 | -2.63127 | 1 | 1 CTB-162E12.1   | -      |
| ENSG00000262962 | 5.13E-15 | -2.63127 | 1 | 1 KARSP3         | K04567 |
| ENSG00000262966 | 5.13E-15 | -2.63127 | 1 | 1 RP11-85B7.2    | -      |
| ENSG00000262967 | 5.13E-15 | -2.63127 | 1 | 1 RP11-294J22.6  | -      |
| ENSG00000262973 | 5.13E-15 | -2.63127 | 1 | 1 RP11-708H21.4  | -      |
| ENSG00000262974 | 5.13E-15 | -2.63127 | 1 | 1 RP11-457I16.4  | K14394 |
| ENSG00000262980 | 5.13E-15 | -2.63127 | 1 | 1 OR52L2P        | K04257 |

|                 |          |          |   |                   |        |
|-----------------|----------|----------|---|-------------------|--------|
| ENSG00000262990 | 5.13E-15 | -2.63127 | 1 | 1 CTC-281F24.2    | K02893 |
| ENSG00000262995 | 5.13E-15 | -2.63127 | 1 | 1 CTD-2194A8.2    | -      |
| ENSG00000263015 | 5.13E-15 | -2.63127 | 1 | 1 RP5-1029F21.3   | -      |
| ENSG00000263020 | 5.13E-15 | -2.63127 | 1 | 1 CSNK2B-LY6G5B-1 | K06846 |
| ENSG00000263029 | 5.13E-15 | -2.63127 | 1 | 1 RP11-517A5.6    | K14394 |
| ENSG00000263033 | 5.13E-15 | -2.63127 | 1 | 1 RP11-396B14.2   | -      |
| ENSG00000263041 | 5.13E-15 | -2.63127 | 1 | 1 RP11-355F22.1   | -      |
| ENSG00000263053 | 5.13E-15 | -2.63127 | 1 | 1 RP11-1055B8.6   | -      |
| ENSG00000263065 | 5.13E-15 | -2.63127 | 1 | 1 AF001548.6      | -      |
| ENSG00000263070 | 5.13E-15 | -2.63127 | 1 | 1 RP11-382B18.3   | K17545 |
| ENSG00000263082 | 5.13E-15 | -2.63127 | 1 | 1 CTD-2034I21.2   | -      |
| ENSG00000263096 | 5.13E-15 | -2.63127 | 1 | 1 RP11-515O17.2   | -      |
| ENSG00000263107 | 5.13E-15 | -2.63127 | 1 | 1 RP11-1113L8.2   | K03327 |
| ENSG00000263110 | 5.13E-15 | -2.63127 | 1 | 1 RP11-189E14.3   | -      |
| ENSG00000263120 | 5.13E-15 | -2.63127 | 1 | 1 RP5-1107A17.4   | -      |
| ENSG00000263125 | 5.13E-15 | -2.63127 | 1 | 1 ARL2BPP8        | K16742 |
| ENSG00000263136 | 5.13E-15 | -2.63127 | 1 | 1 PAGR1           | K14973 |
| ENSG00000263146 | 5.13E-15 | -2.63127 | 1 | 1 RP11-849I19.1   | -      |
| ENSG00000263154 | 5.13E-15 | -2.63127 | 1 | 1 RP11-1055B8.2   | -      |
| ENSG00000263155 | 5.13E-15 | -2.63127 | 1 | 1 MYZAP           | -      |
| ENSG00000263159 | 5.13E-15 | -2.63127 | 1 | 1 RP11-462G12.4   | -      |
| ENSG00000263165 | 5.13E-15 | -2.63127 | 1 | 1 RP11-810M2.2    | -      |
| ENSG00000263167 | 5.13E-15 | -2.63127 | 1 | 1 RP11-149I9.2    | -      |
| ENSG00000263171 | 5.13E-15 | -2.63127 | 1 | 1 RP11-542C16.1   | -      |
| ENSG00000263176 | 5.13E-15 | -2.63127 | 1 | 1 RP11-893F2.15   | -      |
| ENSG00000263177 | 5.13E-15 | -2.63127 | 1 | 1 RP11-433P17.2   | K03878 |
| ENSG00000263179 | 5.13E-15 | -2.63127 | 1 | 1 HNRNPCP4        | K12884 |
| ENSG00000263182 | 5.13E-15 | -2.63127 | 1 | 1 RP11-504P24.6   | -      |
| ENSG00000263189 | 5.13E-15 | -2.63127 | 1 | 1 RP11-618P13.1   | K09228 |
| ENSG00000263196 | 5.13E-15 | -2.63127 | 1 | 1 CTD-2318B16.3   | -      |
| ENSG00000263198 | 5.13E-15 | -2.63127 | 1 | 1 RP11-517A5.4    | -      |
| ENSG00000263199 | 5.13E-15 | -2.63127 | 1 | 1 RP11-372K20.1   | K12757 |
| ENSG00000263203 | 5.13E-15 | -2.63127 | 1 | 1 CHTF8           | -      |
| ENSG00000263204 | 5.13E-15 | -2.63127 | 1 | 1 RP11-1437A8.7   | K14958 |
| ENSG00000263206 | 5.13E-15 | -2.63127 | 1 | 1 KYNUP3          | K01556 |
| ENSG00000263207 | 5.13E-15 | -2.63127 | 1 | 1 RP11-26L20.4    | -      |
| ENSG00000263212 | 5.13E-15 | -2.63127 | 1 | 1 LA16c-306E5.3   | -      |
| ENSG00000263218 | 5.13E-15 | -2.63127 | 1 | 1 CTD-2561B21.7   | -      |
| ENSG00000263232 | 5.13E-15 | -2.63127 | 1 | 1 ATP5A1P3        | K02132 |
| ENSG00000263234 | 5.13E-15 | -2.63127 | 1 | 1 CTD-2135D7.3    | -      |
| ENSG00000263237 | 5.13E-15 | -2.63127 | 1 | 1 RP11-429K17.1   | -      |
| ENSG00000263241 | 5.13E-15 | -2.63127 | 1 | 1 RP11-109M19.4   | K00412 |
| ENSG00000263252 | 5.13E-15 | -2.63127 | 1 | 1 RP11-146P2.1    | -      |
| ENSG00000263253 | 5.13E-15 | -2.63127 | 1 | 1 RP11-204E4.3    | -      |
| ENSG00000263257 | 5.13E-15 | -2.63127 | 1 | 1 RP11-65J21.4    | -      |
| ENSG00000263271 | 5.13E-15 | -2.63127 | 1 | 1 RP11-1055B8.8   | -      |
| ENSG00000263277 | 5.13E-15 | -2.63127 | 1 | 1 RP11-293B20.3   | -      |
| ENSG00000263293 | 5.13E-15 | -2.63127 | 1 | 1 RP11-290H9.4    | -      |
| ENSG00000263300 | 5.13E-15 | -2.63127 | 1 | 1 RP5-1029F21.4   | -      |
| ENSG00000263301 | 5.13E-15 | -2.63127 | 1 | 1 RP11-104H15.8   | -      |
| ENSG00000263305 | 5.13E-15 | -2.63127 | 1 | 1 AP005530.2      | -      |
| ENSG00000263312 | 5.13E-15 | -2.63127 | 1 | 1 RP11-459C13.1   | -      |
| ENSG00000263316 | 5.13E-15 | -2.63127 | 1 | 1 RP11-530N7.3    | -      |
| ENSG00000263317 | 5.13E-15 | -2.63127 | 1 | 1 RP11-429O1.1    | -      |
| ENSG00000263325 | 5.13E-15 | -2.63127 | 1 | 1 LA16c-325D7.1   | -      |
| ENSG00000263326 | 5.13E-15 | -2.63127 | 1 | 1 RP11-266L9.6    | -      |
| ENSG00000263331 | 5.13E-15 | -2.63127 | 1 | 1 CTC-508F8.1     | -      |
| ENSG00000263337 | 5.13E-15 | -2.63127 | 1 | 1 RP11-1277H1.3   | -      |



|                 |          |          |   |                 |        |
|-----------------|----------|----------|---|-----------------|--------|
| ENSG00000263342 | 5.13E-15 | -2.63127 | 1 | 1 RP1-4G17.2    | -      |
| ENSG00000263343 | 5.13E-15 | -2.63127 | 1 | 1 RP11-388M20.7 | K04437 |
| ENSG00000263351 | 5.13E-15 | -2.63127 | 1 | 1 MIR4329       | -      |
| ENSG00000263354 | 5.13E-15 | -2.63127 | 1 | 1 MIR5011       | -      |
| ENSG00000263355 | 5.13E-15 | -2.63127 | 1 | 1 AKR1B10P2     | K00011 |
| ENSG00000263357 | 5.13E-15 | -2.63127 | 1 | 1 AL133167.1    | -      |
| ENSG00000263360 | 5.13E-15 | -2.63127 | 1 | 1 RN7SL134P     | -      |
| ENSG00000263363 | 5.13E-15 | -2.63127 | 1 | 1 MIR5702       | -      |
| ENSG00000263364 | 5.13E-15 | -2.63127 | 1 | 1 AC021052.1    | -      |
| ENSG00000263365 | 5.13E-15 | -2.63127 | 1 | 1 AC123788.1    | -      |
| ENSG00000263368 | 5.13E-15 | -2.63127 | 1 | 1 RP11-720N19.1 | -      |
| ENSG00000263369 | 5.13E-15 | -2.63127 | 1 | 1 RP11-640N20.9 | K11728 |
| ENSG00000263371 | 5.13E-15 | -2.63127 | 1 | 1 AP000673.1    | -      |
| ENSG00000263372 | 5.13E-15 | -2.63127 | 1 | 1 MIR548AO      | -      |
| ENSG00000263375 | 5.13E-15 | -2.63127 | 1 | 1 RP11-822E23.5 | -      |
| ENSG00000263377 | 5.13E-15 | -2.63127 | 1 | 1 AL121875.1    | -      |
| ENSG00000263378 | 5.13E-15 | -2.63127 | 1 | 1 AC019205.1    | -      |
| ENSG00000263380 | 5.13E-15 | -2.63127 | 1 | 1 AC096534.1    | -      |
| ENSG00000263381 | 5.13E-15 | -2.63127 | 1 | 1 MIR5584       | -      |
| ENSG00000263382 | 5.13E-15 | -2.63127 | 1 | 1 RP11-552O4.1  | -      |
| ENSG00000263384 | 5.13E-15 | -2.63127 | 1 | 1 AL354732.1    | -      |
| ENSG00000263385 | 5.13E-15 | -2.63127 | 1 | 1 AC092798.1    | -      |
| ENSG00000263386 | 5.13E-15 | -2.63127 | 1 | 1 RN7SL358P     | -      |
| ENSG00000263388 | 5.13E-15 | -2.63127 | 1 | 1 CTC-297N7.10  | -      |
| ENSG00000263390 | 5.13E-15 | -2.63127 | 1 | 1 MIR3119-1     | -      |
| ENSG00000263391 | 5.13E-15 | -2.63127 | 1 | 1 AL512428.1    | -      |
| ENSG00000263392 | 5.13E-15 | -2.63127 | 1 | 1 AC084262.2    | -      |
| ENSG00000263394 | 5.13E-15 | -2.63127 | 1 | 1 RP11-160E2.19 | -      |
| ENSG00000263395 | 5.13E-15 | -2.63127 | 1 | 1 AC093844.1    | -      |
| ENSG00000263396 | 5.13E-15 | -2.63127 | 1 | 1 RP11-288C17.3 | -      |
| ENSG00000263397 | 5.13E-15 | -2.63127 | 1 | 1 MIR5196       | -      |
| ENSG00000263399 | 5.13E-15 | -2.63127 | 1 | 1 MIR3170       | -      |
| ENSG00000263401 | 5.13E-15 | -2.63127 | 1 | 1 AC008674.1    | -      |
| ENSG00000263403 | 5.13E-15 | -2.63127 | 1 | 1 MIR4673       | -      |
| ENSG00000263404 | 5.13E-15 | -2.63127 | 1 | 1 AL158154.1    | -      |
| ENSG00000263405 | 5.13E-15 | -2.63127 | 1 | 1 PA2G4P3       | -      |
| ENSG00000263409 | 5.13E-15 | -2.63127 | 1 | 1 MIR4747       | -      |
| ENSG00000263410 | 5.13E-15 | -2.63127 | 1 | 1 RN7SL460P     | -      |
| ENSG00000263413 | 5.13E-15 | -2.63127 | 1 | 1 AL928742.1    | -      |
| ENSG00000263414 | 5.13E-15 | -2.63127 | 1 | 1 MIR3187       | -      |
| ENSG00000263415 | 5.13E-15 | -2.63127 | 1 | 1 AC021760.1    | -      |
| ENSG00000263416 | 5.13E-15 | -2.63127 | 1 | 1 AC006145.1    | -      |
| ENSG00000263417 | 5.13E-15 | -2.63127 | 1 | 1 GTSCR1        | -      |
| ENSG00000263421 | 5.13E-15 | -2.63127 | 1 | 1 MIR4687       | -      |
| ENSG00000263424 | 5.13E-15 | -2.63127 | 1 | 1 CTD-2541J13.2 | -      |
| ENSG00000263425 | 5.13E-15 | -2.63127 | 1 | 1 AC131011.1    | -      |
| ENSG00000263426 | 5.13E-15 | -2.63127 | 1 | 1 RN7SL471P     | -      |
| ENSG00000263427 | 5.13E-15 | -2.63127 | 1 | 1 RP11-599B13.3 | -      |
| ENSG00000263429 | 5.13E-15 | -2.63127 | 1 | 1 LINC00675     | -      |
| ENSG00000263433 | 5.13E-15 | -2.63127 | 1 | 1 RP11-260A9.1  | K05005 |
| ENSG00000263435 | 5.13E-15 | -2.63127 | 1 | 1 RP11-17M24.2  | -      |
| ENSG00000263436 | 5.13E-15 | -2.63127 | 1 | 1 MIR3158-2     | -      |
| ENSG00000263437 | 5.13E-15 | -2.63127 | 1 | 1 AC020892.1    | -      |
| ENSG00000263438 | 5.13E-15 | -2.63127 | 1 | 1 RP11-202D1.3  | -      |
| ENSG00000263439 | 5.13E-15 | -2.63127 | 1 | 1 MIR4753       | -      |
| ENSG00000263441 | 5.13E-15 | -2.63127 | 1 | 1 AC012181.1    | -      |
| ENSG00000263443 | 5.13E-15 | -2.63127 | 1 | 1 RP11-973F15.2 | -      |
| ENSG00000263445 | 5.13E-15 | -2.63127 | 1 | 1 MIR4450       | -      |

|                 |          |          |   |                 |        |
|-----------------|----------|----------|---|-----------------|--------|
| ENSG00000263447 | 5.13E-15 | -2.63127 | 1 | 1 AC079117.3    | --     |
| ENSG00000263448 | 5.13E-15 | -2.63127 | 1 | 1 AL133410.1    | --     |
| ENSG00000263449 | 5.13E-15 | -2.63127 | 1 | 1 AC021887.1    | --     |
| ENSG00000263450 | 5.13E-15 | -2.63127 | 1 | 1 RP11-680N20.1 | --     |
| ENSG00000263452 | 5.13E-15 | -2.63127 | 1 | 1 AL121899.1    | --     |
| ENSG00000263453 | 5.13E-15 | -2.63127 | 1 | 1 MIR4532       | --     |
| ENSG00000263456 | 5.13E-15 | -2.63127 | 1 | 1 MIR5189       | --     |
| ENSG00000263457 | 5.13E-15 | -2.63127 | 1 | 1 AC079804.2    | --     |
| ENSG00000263458 | 5.13E-15 | -2.63127 | 1 | 1 MIR4455       | --     |
| ENSG00000263459 | 5.13E-15 | -2.63127 | 1 | 1 AL359552.1    | --     |
| ENSG00000263460 | 5.13E-15 | -2.63127 | 1 | 1 RP11-838N2.8  | --     |
| ENSG00000263462 | 5.13E-15 | -2.63127 | 1 | 1 MIR4750       | --     |
| ENSG00000263468 | 5.13E-15 | -2.63127 | 1 | 1 MIR3130-1     | --     |
| ENSG00000263472 | 5.13E-15 | -2.63127 | 1 | 1 RN7SL576P     | --     |
| ENSG00000263473 | 5.13E-15 | -2.63127 | 1 | 1 MIR54802      | --     |
| ENSG00000263475 | 5.13E-15 | -2.63127 | 1 | 1 AL353805.1    | --     |
| ENSG00000263476 | 5.13E-15 | -2.63127 | 1 | 1 MIR3156-1     | --     |
| ENSG00000263478 | 5.13E-15 | -2.63127 | 1 | 1 RN7SL439P     | --     |
| ENSG00000263479 | 5.13E-15 | -2.63127 | 1 | 1 RN7SL509P     | --     |
| ENSG00000263481 | 5.13E-15 | -2.63127 | 1 | 1 AL603766.1    | --     |
| ENSG00000263483 | 5.13E-15 | -2.63127 | 1 | 1 MTATP6P3      | K02126 |
| ENSG00000263485 | 5.13E-15 | -2.63127 | 1 | 1 CTC-304I17.4  | --     |
| ENSG00000263488 | 5.13E-15 | -2.63127 | 1 | 1 RN7SL301P     | --     |
| ENSG00000263489 | 5.13E-15 | -2.63127 | 1 | 1 CTC-264K15.6  | --     |
| ENSG00000263490 | 5.13E-15 | -2.63127 | 1 | 1 RN7SL155P     | --     |
| ENSG00000263493 | 5.13E-15 | -2.63127 | 1 | 1 RN7SL94P      | --     |
| ENSG00000263494 | 5.13E-15 | -2.63127 | 1 | 1 AC004702.2    | --     |
| ENSG00000263497 | 5.13E-15 | -2.63127 | 1 | 1 AL109844.1    | --     |
| ENSG00000263501 | 5.13E-15 | -2.63127 | 1 | 1 RP11-269G24.2 | --     |
| ENSG00000263502 | 5.13E-15 | -2.63127 | 1 | 1 AC134878.2    | --     |
| ENSG00000263503 | 5.13E-15 | -2.63127 | 1 | 1 RP11-707O23.5 | K04434 |
| ENSG00000263504 | 5.13E-15 | -2.63127 | 1 | 1 AC092104.1    | --     |
| ENSG00000263505 | 5.13E-15 | -2.63127 | 1 | 1 RP11-78F17.3  | --     |
| ENSG00000263506 | 5.13E-15 | -2.63127 | 1 | 1 MIR5193       | --     |
| ENSG00000263507 | 5.13E-15 | -2.63127 | 1 | 1 AL603650.1    | --     |
| ENSG00000263508 | 5.13E-15 | -2.63127 | 1 | 1 RP11-963H4.3  | --     |
| ENSG00000263509 | 5.13E-15 | -2.63127 | 1 | 1 AC078988.1    | --     |
| ENSG00000263510 | 5.13E-15 | -2.63127 | 1 | 1 MIR4497       | --     |
| ENSG00000263511 | 5.13E-15 | -2.63127 | 1 | 1 MIR5699       | --     |
| ENSG00000263512 | 5.13E-15 | -2.63127 | 1 | 1 MIR4311       | --     |
| ENSG00000263514 | 5.13E-15 | -2.63127 | 1 | 1 MIR3668       | --     |
| ENSG00000263515 | 5.13E-15 | -2.63127 | 1 | 1 MIR548AN      | --     |
| ENSG00000263518 | 5.13E-15 | -2.63127 | 1 | 1 AL009050.1    | --     |
| ENSG00000263519 | 5.13E-15 | -2.63127 | 1 | 1 AL157871.1    | --     |
| ENSG00000263520 | 5.13E-15 | -2.63127 | 1 | 1 CTD-2535L24.3 | --     |
| ENSG00000263522 | 5.13E-15 | -2.63127 | 1 | 1 Z97054.1      | --     |
| ENSG00000263524 | 5.13E-15 | -2.63127 | 1 | 1 AC016697.3    | --     |
| ENSG00000263525 | 5.13E-15 | -2.63127 | 1 | 1 AC022909.1    | --     |
| ENSG00000263526 | 5.13E-15 | -2.63127 | 1 | 1 MIR378G       | --     |
| ENSG00000263527 | 5.13E-15 | -2.63127 | 1 | 1 MIR4526       | --     |
| ENSG00000263529 | 5.13E-15 | -2.63127 | 1 | 1 RN7SL122P     | --     |
| ENSG00000263530 | 5.13E-15 | -2.63127 | 1 | 1 AC006994.3    | --     |
| ENSG00000263531 | 5.13E-15 | -2.63127 | 1 | 1 RP13-753N3.1  | --     |
| ENSG00000263533 | 5.13E-15 | -2.63127 | 1 | 1 MIR4463       | --     |
| ENSG00000263537 | 5.13E-15 | -2.63127 | 1 | 1 RN7SL387P     | --     |
| ENSG00000263538 | 5.13E-15 | -2.63127 | 1 | 1 AC097103.1    | --     |
| ENSG00000263540 | 5.13E-15 | -2.63127 | 1 | 1 MIR5582       | --     |
| ENSG00000263542 | 5.13E-15 | -2.63127 | 1 | 1 AL157407.1    | --     |

|                 |          |          |   |                   |        |
|-----------------|----------|----------|---|-------------------|--------|
| ENSG00000263545 | 5.13E-15 | -2.63127 | 1 | 1 AC005195.1      | --     |
| ENSG00000263546 | 5.13E-15 | -2.63127 | 1 | 1 AP002517.1      | --     |
| ENSG00000263547 | 5.13E-15 | -2.63127 | 1 | 1 RP11-1O2.1      | --     |
| ENSG00000263548 | 5.13E-15 | -2.63127 | 1 | 1 MIR5187         | --     |
| ENSG00000263553 | 5.13E-15 | -2.63127 | 1 | 1 RP11-449D8.2    | --     |
| ENSG00000263554 | 5.13E-15 | -2.63127 | 1 | 1 MIR4788         | --     |
| ENSG00000263555 | 5.13E-15 | -2.63127 | 1 | 1 RN7SL533P       | --     |
| ENSG00000263556 | 5.13E-15 | -2.63127 | 1 | 1 RN7SL383P       | --     |
| ENSG00000263557 | 5.13E-15 | -2.63127 | 1 | 1 AC073320.1      | --     |
| ENSG00000263558 | 5.13E-15 | -2.63127 | 1 | 1 RN7SL716P       | --     |
| ENSG00000263561 | 5.13E-15 | -2.63127 | 1 | 1 MIR4704         | --     |
| ENSG00000263565 | 5.13E-15 | -2.63127 | 1 | 1 MIR4738         | --     |
| ENSG00000263566 | 5.13E-15 | -2.63127 | 1 | 1 AC096753.1      | --     |
| ENSG00000263567 | 5.13E-15 | -2.63127 | 1 | 1 RP11-805L22.3   | --     |
| ENSG00000263568 | 5.13E-15 | -2.63127 | 1 | 1 MIR3916         | --     |
| ENSG00000263569 | 5.13E-15 | -2.63127 | 1 | 1 RN7SL212P       | --     |
| ENSG00000263570 | 5.13E-15 | -2.63127 | 1 | 1 AC074264.1      | --     |
| ENSG00000263571 | 5.13E-15 | -2.63127 | 1 | 1 CTC-304I17.5    | --     |
| ENSG00000263572 | 5.13E-15 | -2.63127 | 1 | 1 MIR5683         | --     |
| ENSG00000263573 | 5.13E-15 | -2.63127 | 1 | 1 MIR4270         | --     |
| ENSG00000263574 | 5.13E-15 | -2.63127 | 1 | 1 CTD-2532D12.4   | --     |
| ENSG00000263575 | 5.13E-15 | -2.63127 | 1 | 1 MIR4665         | --     |
| ENSG00000263576 | 5.13E-15 | -2.63127 | 1 | 1 AL121748.1      | --     |
| ENSG00000263577 | 5.13E-15 | -2.63127 | 1 | 1 AL160291.1      | --     |
| ENSG00000263578 | 5.13E-15 | -2.63127 | 1 | 1 AL359546.1      | --     |
| ENSG00000263581 | 5.13E-15 | -2.63127 | 1 | 1 MIR548X2        | --     |
| ENSG00000263582 | 5.13E-15 | -2.63127 | 1 | 1 RN7SL768P       | --     |
| ENSG00000263583 | 5.13E-15 | -2.63127 | 1 | 1 MIR4522         | --     |
| ENSG00000263585 | 5.13E-15 | -2.63127 | 1 | 1 RP11-498C9.13   | --     |
| ENSG00000263586 | 5.13E-15 | -2.63127 | 1 | 1 RP11-309N17.4   | --     |
| ENSG00000263587 | 5.13E-15 | -2.63127 | 1 | 1 RN7SL296P       | --     |
| ENSG00000263588 | 5.13E-15 | -2.63127 | 1 | 1 RP11-595B24.2   | K00272 |
| ENSG00000263591 | 5.13E-15 | -2.63127 | 1 | 1 RN7SL136P       | --     |
| ENSG00000263592 | 5.13E-15 | -2.63127 | 1 | 1 AL035457.1      | --     |
| ENSG00000263593 | 5.13E-15 | -2.63127 | 1 | 1 MIR4804         | --     |
| ENSG00000263594 | 5.13E-15 | -2.63127 | 1 | 1 RP11-28O3.2     | --     |
| ENSG00000263595 | 5.13E-15 | -2.63127 | 1 | 1 RN7SL823P       | --     |
| ENSG00000263596 | 5.13E-15 | -2.63127 | 1 | 1 AC013477.1      | --     |
| ENSG00000263599 | 5.13E-15 | -2.63127 | 1 | 1 RN7SL171P       | --     |
| ENSG00000263600 | 5.13E-15 | -2.63127 | 1 | 1 MIR3915         | --     |
| ENSG00000263602 | 5.13E-15 | -2.63127 | 1 | 1 MIR3185         | --     |
| ENSG00000263603 | 5.13E-15 | -2.63127 | 1 | 1 CTD-2349P21.5   | --     |
| ENSG00000263604 | 5.13E-15 | -2.63127 | 1 | 1 RP11-19P22.3    | --     |
| ENSG00000263608 | 5.13E-15 | -2.63127 | 1 | 1 RN7SL353P       | --     |
| ENSG00000263609 | 5.13E-15 | -2.63127 | 1 | 1 RP11-1109M24.16 | --     |
| ENSG00000263611 | 5.13E-15 | -2.63127 | 1 | 1 RP11-612A1.1    | --     |
| ENSG00000263613 | 5.13E-15 | -2.63127 | 1 | 1 RP11-321A17.5   | --     |
| ENSG00000263614 | 5.13E-15 | -2.63127 | 1 | 1 CR786580.1      | --     |
| ENSG00000263615 | 5.13E-15 | -2.63127 | 1 | 1 MIR4306         | --     |
| ENSG00000263616 | 5.13E-15 | -2.63127 | 1 | 1 RN7SL178P       | --     |
| ENSG00000263618 | 5.13E-15 | -2.63127 | 1 | 1 RP11-527H14.4   | --     |
| ENSG00000263620 | 5.13E-15 | -2.63127 | 1 | 1 RP11-599B13.6   | K13504 |
| ENSG00000263621 | 5.13E-15 | -2.63127 | 1 | 1 RN7SL650P       | --     |
| ENSG00000263622 | 5.13E-15 | -2.63127 | 1 | 1 RP11-389J22.3   | --     |
| ENSG00000263623 | 5.13E-15 | -2.63127 | 1 | 1 AC005701.1      | --     |
| ENSG00000263626 | 5.13E-15 | -2.63127 | 1 | 1 AL392111.1      | --     |
| ENSG00000263628 | 5.13E-15 | -2.63127 | 1 | 1 MIR3155A        | --     |
| ENSG00000263629 | 5.13E-15 | -2.63127 | 1 | 1 MIR5586         | --     |

|                 |          |          |   |                 |        |
|-----------------|----------|----------|---|-----------------|--------|
| ENSG00000263630 | 5.13E-15 | -2.63127 | 1 | 1 AP005271.1    | --     |
| ENSG00000263631 | 5.13E-15 | -2.63127 | 1 | 1 MIR378D1      | --     |
| ENSG00000263632 | 5.13E-15 | -2.63127 | 1 | 1 AC126177.1    | --     |
| ENSG00000263633 | 5.13E-15 | -2.63127 | 1 | 1 RN7SL374P     | --     |
| ENSG00000263634 | 5.13E-15 | -2.63127 | 1 | 1 MIR3919       | --     |
| ENSG00000263635 | 5.13E-15 | -2.63127 | 1 | 1 RP11-805F19.2 | --     |
| ENSG00000263636 | 5.13E-15 | -2.63127 | 1 | 1 AC138304.1    | --     |
| ENSG00000263637 | 5.13E-15 | -2.63127 | 1 | 1 RP11-106E15.1 | --     |
| ENSG00000263640 | 5.13E-15 | -2.63127 | 1 | 1 AF235103.1    | --     |
| ENSG00000263641 | 5.13E-15 | -2.63127 | 1 | 1 MIR4777       | --     |
| ENSG00000263642 | 5.13E-15 | -2.63127 | 1 | 1 MIR4802       | --     |
| ENSG00000263643 | 5.13E-15 | -2.63127 | 1 | 1 MIR4515       | --     |
| ENSG00000263644 | 5.13E-15 | -2.63127 | 1 | 1 RP11-269G24.3 | --     |
| ENSG00000263645 | 5.13E-15 | -2.63127 | 1 | 1 AL079339.1    | --     |
| ENSG00000263647 | 5.13E-15 | -2.63127 | 1 | 1 RP11-927P21.5 | K11728 |
| ENSG00000263649 | 5.13E-15 | -2.63127 | 1 | 1 MIR3135B      | --     |
| ENSG00000263650 | 5.13E-15 | -2.63127 | 1 | 1 RN7SL270P     | --     |
| ENSG00000263651 | 5.13E-15 | -2.63127 | 1 | 1 AC139451.1    | --     |
| ENSG00000263652 | 5.13E-15 | -2.63127 | 1 | 1 MIR548AX      | --     |
| ENSG00000263653 | 5.13E-15 | -2.63127 | 1 | 1 AC007025.1    | --     |
| ENSG00000263654 | 5.13E-15 | -2.63127 | 1 | 1 RN7SL711P     | --     |
| ENSG00000263655 | 5.13E-15 | -2.63127 | 1 | 1 RP11-25L3.3   | --     |
| ENSG00000263656 | 5.13E-15 | -2.63127 | 1 | 1 AC105402.1    | --     |
| ENSG00000263658 | 5.13E-15 | -2.63127 | 1 | 1 AL356865.1    | --     |
| ENSG00000263659 | 5.13E-15 | -2.63127 | 1 | 1 RN7SL603P     | --     |
| ENSG00000263661 | 5.13E-15 | -2.63127 | 1 | 1 AC009132.1    | --     |
| ENSG00000263663 | 5.13E-15 | -2.63127 | 1 | 1 AL161891.1    | --     |
| ENSG00000263666 | 5.13E-15 | -2.63127 | 1 | 1 SNORA70D      | --     |
| ENSG00000263667 | 5.13E-15 | -2.63127 | 1 | 1 RP3-416J7.4   | --     |
| ENSG00000263669 | 5.13E-15 | -2.63127 | 1 | 1 RN7SL470P     | --     |
| ENSG00000263670 | 5.13E-15 | -2.63127 | 1 | 1 MIR4457       | --     |
| ENSG00000263672 | 5.13E-15 | -2.63127 | 1 | 1 RN7SL750P     | --     |
| ENSG00000263674 | 5.13E-15 | -2.63127 | 1 | 1 RP11-443G13.2 | --     |
| ENSG00000263676 | 5.13E-15 | -2.63127 | 1 | 1 MIR4632       | --     |
| ENSG00000263677 | 5.13E-15 | -2.63127 | 1 | 1 RP11-17A19.2  | --     |
| ENSG00000263678 | 5.13E-15 | -2.63127 | 1 | 1 AC072031.1    | --     |
| ENSG00000263682 | 5.13E-15 | -2.63127 | 1 | 1 RP11-93H10.1  | --     |
| ENSG00000263683 | 5.13E-15 | -2.63127 | 1 | 1 RP4-777O23.1  | --     |
| ENSG00000263684 | 5.13E-15 | -2.63127 | 1 | 1 RP11-628O18.1 | --     |
| ENSG00000263685 | 5.13E-15 | -2.63127 | 1 | 1 AC010884.2    | --     |
| ENSG00000263686 | 5.13E-15 | -2.63127 | 1 | 1 AL391375.1    | --     |
| ENSG00000263688 | 5.13E-15 | -2.63127 | 1 | 1 RP11-386P4.1  | --     |
| ENSG00000263689 | 5.13E-15 | -2.63127 | 1 | 1 AC128653.1    | --     |
| ENSG00000263690 | 5.13E-15 | -2.63127 | 1 | 1 AC011591.1    | --     |
| ENSG00000263691 | 5.13E-15 | -2.63127 | 1 | 1 AL355885.1    | --     |
| ENSG00000263692 | 5.13E-15 | -2.63127 | 1 | 1 AC091320.2    | --     |
| ENSG00000263693 | 5.13E-15 | -2.63127 | 1 | 1 MIR3161       | --     |
| ENSG00000263694 | 5.13E-15 | -2.63127 | 1 | 1 RN7SL224P     | --     |
| ENSG00000263697 | 5.13E-15 | -2.63127 | 1 | 1 MIR3621       | --     |
| ENSG00000263698 | 5.13E-15 | -2.63127 | 1 | 1 RP11-408H20.3 | --     |
| ENSG00000263705 | 5.13E-15 | -2.63127 | 1 | 1 MIR5689       | --     |
| ENSG00000263706 | 5.13E-15 | -2.63127 | 1 | 1 RN7SL450P     | --     |
| ENSG00000263707 | 5.13E-15 | -2.63127 | 1 | 1 RP11-597M12.1 | --     |
| ENSG00000263708 | 5.13E-15 | -2.63127 | 1 | 1 RP11-85B7.4   | --     |
| ENSG00000263709 | 5.13E-15 | -2.63127 | 1 | 1 RP11-321A17.4 | --     |
| ENSG00000263710 | 5.13E-15 | -2.63127 | 1 | 1 AC025175.1    | --     |
| ENSG00000263712 | 5.13E-15 | -2.63127 | 1 | 1 MIR4639       | --     |
| ENSG00000263713 | 5.13E-15 | -2.63127 | 1 | 1 AC109994.1    | --     |

|                 |          |          |   |                   |        |
|-----------------|----------|----------|---|-------------------|--------|
| ENSG00000263714 | 5.13E-15 | -2.63127 | 1 | 1 RN7SL755P       | --     |
| ENSG00000263715 | 5.13E-15 | -2.63127 | 1 | 1 RP11-105N13.4   | --     |
| ENSG00000263716 | 5.13E-15 | -2.63127 | 1 | 1 SLC25A51P2      | --     |
| ENSG00000263717 | 5.13E-15 | -2.63127 | 1 | 1 RP11-466A19.6   | --     |
| ENSG00000263718 | 5.13E-15 | -2.63127 | 1 | 1 RP11-285E9.6    | --     |
| ENSG00000263719 | 5.13E-15 | -2.63127 | 1 | 1 MIR4523         | --     |
| ENSG00000263720 | 5.13E-15 | -2.63127 | 1 | 1 RP11-389J22.1   | --     |
| ENSG00000263721 | 5.13E-15 | -2.63127 | 1 | 1 MIR4444-2       | --     |
| ENSG00000263723 | 5.13E-15 | -2.63127 | 1 | 1 SNORD39         | --     |
| ENSG00000263724 | 5.13E-15 | -2.63127 | 1 | 1 DLGAP1-AS3      | --     |
| ENSG00000263725 | 5.13E-15 | -2.63127 | 1 | 1 FTLP13          | --     |
| ENSG00000263726 | 5.13E-15 | -2.63127 | 1 | 1 CTB-187M2.3     | --     |
| ENSG00000263729 | 5.13E-15 | -2.63127 | 1 | 1 RP11-746M1.8    | K08789 |
| ENSG00000263730 | 5.13E-15 | -2.63127 | 1 | 1 MIR3937         | --     |
| ENSG00000263732 | 5.13E-15 | -2.63127 | 1 | 1 AC012564.1      | --     |
| ENSG00000263733 | 5.13E-15 | -2.63127 | 1 | 1 RP11-47G4.1     | K09598 |
| ENSG00000263734 | 5.13E-15 | -2.63127 | 1 | 1 MIR4643         | --     |
| ENSG00000263735 | 5.13E-15 | -2.63127 | 1 | 1 MIR4662A        | --     |
| ENSG00000263737 | 5.13E-15 | -2.63127 | 1 | 1 RN7SL476P       | --     |
| ENSG00000263738 | 5.13E-15 | -2.63127 | 1 | 1 AC079233.1      | --     |
| ENSG00000263741 | 5.13E-15 | -2.63127 | 1 | 1 MIR548AS        | --     |
| ENSG00000263743 | 5.13E-15 | -2.63127 | 1 | 1 AC017028.2      | --     |
| ENSG00000263744 | 5.13E-15 | -2.63127 | 1 | 1 MIR3664         | --     |
| ENSG00000263745 | 5.13E-15 | -2.63127 | 1 | 1 RP11-161I6.2    | --     |
| ENSG00000263746 | 5.13E-15 | -2.63127 | 1 | 1 MIR4277         | --     |
| ENSG00000263748 | 5.13E-15 | -2.63127 | 1 | 1 EXOGP1          | K15050 |
| ENSG00000263749 | 5.13E-15 | -2.63127 | 1 | 1 OOSP1P2         | --     |
| ENSG00000263750 | 5.13E-15 | -2.63127 | 1 | 1 MIR548AV        | --     |
| ENSG00000263751 | 5.13E-15 | -2.63127 | 1 | 1 AL122127.1      | --     |
| ENSG00000263752 | 5.13E-15 | -2.63127 | 1 | 1 MIR3133         | --     |
| ENSG00000263754 | 5.13E-15 | -2.63127 | 1 | 1 CR786580.2      | --     |
| ENSG00000263755 | 5.13E-15 | -2.63127 | 1 | 1 RN7SL498P       | --     |
| ENSG00000263756 | 5.13E-15 | -2.63127 | 1 | 1 XXbac-BPG181M17 | --     |
| ENSG00000263757 | 5.13E-15 | -2.63127 | 1 | 1 AC027288.1      | --     |
| ENSG00000263759 | 5.13E-15 | -2.63127 | 1 | 1 AC122714.1      | --     |
| ENSG00000263763 | 5.13E-15 | -2.63127 | 1 | 1 MIR3686         | --     |
| ENSG00000263765 | 5.13E-15 | -2.63127 | 1 | 1 RP11-746B8.1    | --     |
| ENSG00000263767 | 5.13E-15 | -2.63127 | 1 | 1 AC083906.1      | --     |
| ENSG00000263768 | 5.13E-15 | -2.63127 | 1 | 1 AC060226.1      | --     |
| ENSG00000263769 | 5.13E-15 | -2.63127 | 1 | 1 RN7SL367P       | --     |
| ENSG00000263770 | 5.13E-15 | -2.63127 | 1 | 1 AL031666.1      | --     |
| ENSG00000263772 | 5.13E-15 | -2.63127 | 1 | 1 RP11-549B18.3   | K08496 |
| ENSG00000263774 | 5.13E-15 | -2.63127 | 1 | 1 AC017104.1      | --     |
| ENSG00000263775 | 5.13E-15 | -2.63127 | 1 | 1 AC080008.1      | --     |
| ENSG00000263776 | 5.13E-15 | -2.63127 | 1 | 1 SNORA4          | --     |
| ENSG00000263779 | 5.13E-15 | -2.63127 | 1 | 1 RN7SL467P       | --     |
| ENSG00000263780 | 5.13E-15 | -2.63127 | 1 | 1 AC005621.1      | --     |
| ENSG00000263781 | 5.13E-15 | -2.63127 | 1 | 1 RP11-321A17.3   | K03938 |
| ENSG00000263782 | 5.13E-15 | -2.63127 | 1 | 1 AC117481.1      | --     |
| ENSG00000263783 | 5.13E-15 | -2.63127 | 1 | 1 MIR5590         | --     |
| ENSG00000263784 | 5.13E-15 | -2.63127 | 1 | 1 AL136418.1      | --     |
| ENSG00000263785 | 5.13E-15 | -2.63127 | 1 | 1 MIR3182         | --     |
| ENSG00000263787 | 5.13E-15 | -2.63127 | 1 | 1 RP11-456D7.1    | --     |
| ENSG00000263788 | 5.13E-15 | -2.63127 | 1 | 1 CTD-2008P7.7    | --     |
| ENSG00000263790 | 5.13E-15 | -2.63127 | 1 | 1 MIR4473         | --     |
| ENSG00000263791 | 5.13E-15 | -2.63127 | 1 | 1 MIR4727         | --     |
| ENSG00000263793 | 5.13E-15 | -2.63127 | 1 | 1 MIR3115         | --     |
| ENSG00000263794 | 5.13E-15 | -2.63127 | 1 | 1 RN7SL457P       | --     |

|                 |          |          |   |                 |        |
|-----------------|----------|----------|---|-----------------|--------|
| ENSG00000263795 | 5.13E-15 | -2.63127 | 1 | 1 MIR5100       | --     |
| ENSG00000263796 | 5.13E-15 | -2.63127 | 1 | 1 RN7SL609P     | --     |
| ENSG00000263797 | 5.13E-15 | -2.63127 | 1 | 1 RP11-146G7.2  | --     |
| ENSG00000263798 | 5.13E-15 | -2.63127 | 1 | 1 RP11-6N17.9   | --     |
| ENSG00000263800 | 5.13E-15 | -2.63127 | 1 | 1 MIR5684       | --     |
| ENSG00000263802 | 5.13E-15 | -2.63127 | 1 | 1 AL121655.1    | --     |
| ENSG00000263803 | 5.13E-15 | -2.63127 | 1 | 1 RN7SL816P     | --     |
| ENSG00000263804 | 5.13E-15 | -2.63127 | 1 | 1 RN7SL409P     | --     |
| ENSG00000263805 | 5.13E-15 | -2.63127 | 1 | 1 AL450244.1    | --     |
| ENSG00000263808 | 5.13E-15 | -2.63127 | 1 | 1 AC093376.1    | --     |
| ENSG00000263810 | 5.13E-15 | -2.63127 | 1 | 1 AC055723.1    | --     |
| ENSG00000263811 | 5.13E-15 | -2.63127 | 1 | 1 MIR3675       | --     |
| ENSG00000263812 | 5.13E-15 | -2.63127 | 1 | 1 LINC00908     | --     |
| ENSG00000263814 | 5.13E-15 | -2.63127 | 1 | 1 AC093786.1    | --     |
| ENSG00000263815 | 5.13E-15 | -2.63127 | 1 | 1 RN7SL426P     | --     |
| ENSG00000263816 | 5.13E-15 | -2.63127 | 1 | 1 MIR548AW      | --     |
| ENSG00000263817 | 5.13E-15 | -2.63127 | 1 | 1 RN7SL157P     | --     |
| ENSG00000263819 | 5.13E-15 | -2.63127 | 1 | 1 RN7SL478P     | --     |
| ENSG00000263820 | 5.13E-15 | -2.63127 | 1 | 1 AC005702.2    | --     |
| ENSG00000263821 | 5.13E-15 | -2.63127 | 1 | 1 RP11-527H14.1 | --     |
| ENSG00000263825 | 5.13E-15 | -2.63127 | 1 | 1 AL358813.2    | --     |
| ENSG00000263827 | 5.13E-15 | -2.63127 | 1 | 1 AP005118.1    | --     |
| ENSG00000263828 | 5.13E-15 | -2.63127 | 1 | 1 MIR4439       | --     |
| ENSG00000263829 | 5.13E-15 | -2.63127 | 1 | 1 FAM60BP       | --     |
| ENSG00000263830 | 5.13E-15 | -2.63127 | 1 | 1 RN7SL871P     | --     |
| ENSG00000263831 | 5.13E-15 | -2.63127 | 1 | 1 MIR378E       | --     |
| ENSG00000263832 | 5.13E-15 | -2.63127 | 1 | 1 AC023237.1    | --     |
| ENSG00000263834 | 5.13E-15 | -2.63127 | 1 | 1 MIR4635       | --     |
| ENSG00000263835 | 5.13E-15 | -2.63127 | 1 | 1 BX649553.1    | --     |
| ENSG00000263838 | 5.13E-15 | -2.63127 | 1 | 1 MIR4698       | --     |
| ENSG00000263840 | 5.13E-15 | -2.63127 | 1 | 1 AC011431.2    | --     |
| ENSG00000263841 | 5.13E-15 | -2.63127 | 1 | 1 RN7SL44P      | --     |
| ENSG00000263845 | 5.13E-15 | -2.63127 | 1 | 1 AL390879.1    | --     |
| ENSG00000263846 | 5.13E-15 | -2.63127 | 1 | 1 CIAPIN1P      | --     |
| ENSG00000263848 | 5.13E-15 | -2.63127 | 1 | 1 AC108057.1    | --     |
| ENSG00000263849 | 5.13E-15 | -2.63127 | 1 | 1 MIR4744       | --     |
| ENSG00000263855 | 5.13E-15 | -2.63127 | 1 | 1 AC105081.1    | --     |
| ENSG00000263856 | 5.13E-15 | -2.63127 | 1 | 1 AL121756.1    | --     |
| ENSG00000263857 | 5.13E-15 | -2.63127 | 1 | 1 MIR4729       | --     |
| ENSG00000263858 | 5.13E-15 | -2.63127 | 1 | 1 MIR4769       | --     |
| ENSG00000263859 | 5.13E-15 | -2.63127 | 1 | 1 RP11-498C9.16 | --     |
| ENSG00000263860 | 5.13E-15 | -2.63127 | 1 | 1 RP11-218M11.3 | --     |
| ENSG00000263861 | 5.13E-15 | -2.63127 | 1 | 1 MIR3927       | --     |
| ENSG00000263862 | 5.13E-15 | -2.63127 | 1 | 1 RP11-107K17.1 | --     |
| ENSG00000263863 | 5.13E-15 | -2.63127 | 1 | 1 AC007948.1    | --     |
| ENSG00000263868 | 5.13E-15 | -2.63127 | 1 | 1 AL139319.1    | --     |
| ENSG00000263870 | 5.13E-15 | -2.63127 | 1 | 1 CTD-2350C19.5 | K04353 |
| ENSG00000263872 | 5.13E-15 | -2.63127 | 1 | 1 hsa-mir-4528  | --     |
| ENSG00000263873 | 5.13E-15 | -2.63127 | 1 | 1 RP11-334E6.12 | --     |
| ENSG00000263875 | 5.13E-15 | -2.63127 | 1 | 1 AL353629.1    | --     |
| ENSG00000263877 | 5.13E-15 | -2.63127 | 1 | 1 RN7SL276P     | --     |
| ENSG00000263878 | 5.13E-15 | -2.63127 | 1 | 1 DLGAP1-AS4    | --     |
| ENSG00000263880 | 5.13E-15 | -2.63127 | 1 | 1 RN7SL747P     | --     |
| ENSG00000263881 | 5.13E-15 | -2.63127 | 1 | 1 MIR4436B1     | --     |
| ENSG00000263882 | 5.13E-15 | -2.63127 | 1 | 1 RN7SL774P     | --     |
| ENSG00000263883 | 5.13E-15 | -2.63127 | 1 | 1 RP11-51F16.5  | K15410 |
| ENSG00000263885 | 5.13E-15 | -2.63127 | 1 | 1 MIR3920       | --     |
| ENSG00000263886 | 5.13E-15 | -2.63127 | 1 | 1 AL953885.1    | --     |

|                 |          |          |   |                  |        |
|-----------------|----------|----------|---|------------------|--------|
| ENSG00000263888 | 5.13E-15 | -2.63127 | 1 | 1 RN7SL777P      | --     |
| ENSG00000263889 | 5.13E-15 | -2.63127 | 1 | 1 RN7SL86P       | --     |
| ENSG00000263890 | 5.13E-15 | -2.63127 | 1 | 1 MIR4303        | --     |
| ENSG00000263891 | 5.13E-15 | -2.63127 | 1 | 1 AC092634.1     | --     |
| ENSG00000263892 | 5.13E-15 | -2.63127 | 1 | 1 MIR4667        | --     |
| ENSG00000263893 | 5.13E-15 | -2.63127 | 1 | 1 CTD-3010D24.3  | --     |
| ENSG00000263894 | 5.13E-15 | -2.63127 | 1 | 1 MIR3925        | --     |
| ENSG00000263895 | 5.13E-15 | -2.63127 | 1 | 1 RP11-110H1.9   | --     |
| ENSG00000263897 | 5.13E-15 | -2.63127 | 1 | 1 MIR4669        | --     |
| ENSG00000263898 | 5.13E-15 | -2.63127 | 1 | 1 MIR4793        | --     |
| ENSG00000263900 | 5.13E-15 | -2.63127 | 1 | 1 AC006483.1     | --     |
| ENSG00000263901 | 5.13E-15 | -2.63127 | 1 | 1 RN7SL544P      | --     |
| ENSG00000263902 | 5.13E-15 | -2.63127 | 1 | 1 RN7SL437P      | --     |
| ENSG00000263903 | 5.13E-15 | -2.63127 | 1 | 1 AL035250.1     | --     |
| ENSG00000263904 | 5.13E-15 | -2.63127 | 1 | 1 RP11-344B2.3   | --     |
| ENSG00000263905 | 5.13E-15 | -2.63127 | 1 | 1 RN7SL555P      | --     |
| ENSG00000263906 | 5.13E-15 | -2.63127 | 1 | 1 RP11-680F20.11 | --     |
| ENSG00000263907 | 5.13E-15 | -2.63127 | 1 | 1 AL354833.1     | --     |
| ENSG00000263908 | 5.13E-15 | -2.63127 | 1 | 1 MIR3116-2      | --     |
| ENSG00000263909 | 5.13E-15 | -2.63127 | 1 | 1 MIR5000        | --     |
| ENSG00000263910 | 5.13E-15 | -2.63127 | 1 | 1 AC133749.1     | --     |
| ENSG00000263911 | 5.13E-15 | -2.63127 | 1 | 1 RN7SL31P       | --     |
| ENSG00000263914 | 5.13E-15 | -2.63127 | 1 | 1 RP11-846F4.5   | K03879 |
| ENSG00000263917 | 5.13E-15 | -2.63127 | 1 | 1 RP11-53I6.2    | --     |
| ENSG00000263918 | 5.13E-15 | -2.63127 | 1 | 1 MIR3670-1      | --     |
| ENSG00000263919 | 5.13E-15 | -2.63127 | 1 | 1 RN7SL686P      | --     |
| ENSG00000263920 | 5.13E-15 | -2.63127 | 1 | 1 AC067751.1     | --     |
| ENSG00000263921 | 5.13E-15 | -2.63127 | 1 | 1 AC013737.1     | --     |
| ENSG00000263923 | 5.13E-15 | -2.63127 | 1 | 1 RP11-571L19.7  | --     |
| ENSG00000263924 | 5.13E-15 | -2.63127 | 1 | 1 RP11-210K20.2  | --     |
| ENSG00000263926 | 5.13E-15 | -2.63127 | 1 | 1 MIR4462        | --     |
| ENSG00000263927 | 5.13E-15 | -2.63127 | 1 | 1 AC099759.1     | --     |
| ENSG00000263928 | 5.13E-15 | -2.63127 | 1 | 1 AL354833.2     | --     |
| ENSG00000263929 | 5.13E-15 | -2.63127 | 1 | 1 RN7SL186P      | --     |
| ENSG00000263930 | 5.13E-15 | -2.63127 | 1 | 1 MIR4509-1      | --     |
| ENSG00000263932 | 5.13E-15 | -2.63127 | 1 | 1 MIR4448        | --     |
| ENSG00000263933 | 5.13E-15 | -2.63127 | 1 | 1 AL365502.1     | --     |
| ENSG00000263935 | 5.13E-15 | -2.63127 | 1 | 1 RP11-674N23.2  | --     |
| ENSG00000263938 | 5.13E-15 | -2.63127 | 1 | 1 RP11-579O24.3  | --     |
| ENSG00000263940 | 5.13E-15 | -2.63127 | 1 | 1 RN7SL275P      | --     |
| ENSG00000263941 | 5.13E-15 | -2.63127 | 1 | 1 RN7SL32P       | --     |
| ENSG00000263943 | 5.13E-15 | -2.63127 | 1 | 1 RN7SL680P      | --     |
| ENSG00000263944 | 5.13E-15 | -2.63127 | 1 | 1 RN7SL435P      | --     |
| ENSG00000263945 | 5.13E-15 | -2.63127 | 1 | 1 MIR548Y        | --     |
| ENSG00000263946 | 5.13E-15 | -2.63127 | 1 | 1 RP11-434D2.11  | K10383 |
| ENSG00000263947 | 5.13E-15 | -2.63127 | 1 | 1 RN7SL694P      | --     |
| ENSG00000263948 | 5.13E-15 | -2.63127 | 1 | 1 MIR4785        | --     |
| ENSG00000263952 | 5.13E-15 | -2.63127 | 1 | 1 RP11-513M1.1   | --     |
| ENSG00000263954 | 5.13E-15 | -2.63127 | 1 | 1 AC004769.1     | --     |
| ENSG00000263955 | 5.13E-15 | -2.63127 | 1 | 1 RN7SL850P      | --     |
| ENSG00000263957 | 5.13E-15 | -2.63127 | 1 | 1 AC105398.1     | --     |
| ENSG00000263958 | 5.13E-15 | -2.63127 | 1 | 1 RP11-676J15.1  | --     |
| ENSG00000263959 | 5.13E-15 | -2.63127 | 1 | 1 AC092988.1     | --     |
| ENSG00000263960 | 5.13E-15 | -2.63127 | 1 | 1 AC007773.1     | --     |
| ENSG00000263963 | 5.13E-15 | -2.63127 | 1 | 1 MIR4461        | --     |
| ENSG00000263964 | 5.13E-15 | -2.63127 | 1 | 1 MIR4509-2      | --     |
| ENSG00000263966 | 5.13E-15 | -2.63127 | 1 | 1 AP000765.1     | --     |
| ENSG00000263967 | 5.13E-15 | -2.63127 | 1 | 1 MIR4290        | --     |

|                 |          |          |   |                  |        |
|-----------------|----------|----------|---|------------------|--------|
| ENSG00000263969 | 5.13E-15 | -2.63127 | 1 | 1 RN7SL678P      | --     |
| ENSG00000263970 | 5.13E-15 | -2.63127 | 1 | 1 RP11-789C17.5  | --     |
| ENSG00000263972 | 5.13E-15 | -2.63127 | 1 | 1 MIR1587        | --     |
| ENSG00000263973 | 5.13E-15 | -2.63127 | 1 | 1 MIR4760        | --     |
| ENSG00000263974 | 5.13E-15 | -2.63127 | 1 | 1 RN7SL121P      | --     |
| ENSG00000263976 | 5.13E-15 | -2.63127 | 1 | 1 YWHAEP3        | K06630 |
| ENSG00000263978 | 5.13E-15 | -2.63127 | 1 | 1 MIR4499        | --     |
| ENSG00000263979 | 5.13E-15 | -2.63127 | 1 | 1 MIR4672        | --     |
| ENSG00000263980 | 5.13E-15 | -2.63127 | 1 | 1 BX649553.2     | --     |
| ENSG00000263981 | 5.13E-15 | -2.63127 | 1 | 1 MIR5705        | --     |
| ENSG00000263982 | 5.13E-15 | -2.63127 | 1 | 1 RP11-504I13.3  | --     |
| ENSG00000263984 | 5.13E-15 | -2.63127 | 1 | 1 AC092380.1     | --     |
| ENSG00000263985 | 5.13E-15 | -2.63127 | 1 | 1 AC116407.1     | --     |
| ENSG00000263986 | 5.13E-15 | -2.63127 | 1 | 1 RP11-746M1.1   | --     |
| ENSG00000263987 | 5.13E-15 | -2.63127 | 1 | 1 MIR5698        | --     |
| ENSG00000263988 | 5.13E-15 | -2.63127 | 1 | 1 RN7SL147P      | --     |
| ENSG00000263989 | 5.13E-15 | -2.63127 | 1 | 1 RN7SL615P      | --     |
| ENSG00000263991 | 5.13E-15 | -2.63127 | 1 | 1 RN7SL386P      | --     |
| ENSG00000263993 | 5.13E-15 | -2.63127 | 1 | 1 RN7SL786P      | --     |
| ENSG00000263997 | 5.13E-15 | -2.63127 | 1 | 1 AC006130.1     | --     |
| ENSG00000263999 | 5.13E-15 | -2.63127 | 1 | 1 RN7SL42P       | --     |
| ENSG00000264000 | 5.13E-15 | -2.63127 | 1 | 1 RP11-286N3.2   | --     |
| ENSG00000264002 | 5.13E-15 | -2.63127 | 1 | 1 RN7SL52P       | --     |
| ENSG00000264004 | 5.13E-15 | -2.63127 | 1 | 1 MIR4717        | --     |
| ENSG00000264005 | 5.13E-15 | -2.63127 | 1 | 1 MIR4314        | --     |
| ENSG00000264009 | 5.13E-15 | -2.63127 | 1 | 1 AP001631.1     | --     |
| ENSG00000264010 | 5.13E-15 | -2.63127 | 1 | 1 MIR4429        | --     |
| ENSG00000264013 | 5.13E-15 | -2.63127 | 1 | 1 MIR3938        | --     |
| ENSG00000264014 | 5.13E-15 | -2.63127 | 1 | 1 MIR4253        | --     |
| ENSG00000264015 | 5.13E-15 | -2.63127 | 1 | 1 RP11-176N18.2  | --     |
| ENSG00000264016 | 5.13E-15 | -2.63127 | 1 | 1 CTC-297N7.9    | --     |
| ENSG00000264018 | 5.13E-15 | -2.63127 | 1 | 1 RN7SL207P      | --     |
| ENSG00000264019 | 5.13E-15 | -2.63127 | 1 | 1 RP11-6N17.6    | --     |
| ENSG00000264020 | 5.13E-15 | -2.63127 | 1 | 1 AC027806.1     | --     |
| ENSG00000264021 | 5.13E-15 | -2.63127 | 1 | 1 MIR3917        | --     |
| ENSG00000264022 | 5.13E-15 | -2.63127 | 1 | 1 AL732363.1     | --     |
| ENSG00000264023 | 5.13E-15 | -2.63127 | 1 | 1 RP11-728E14.2  | --     |
| ENSG00000264024 | 5.13E-15 | -2.63127 | 1 | 1 AL901608.1     | --     |
| ENSG00000264026 | 5.13E-15 | -2.63127 | 1 | 1 RP11-1124B17.1 | --     |
| ENSG00000264028 | 5.13E-15 | -2.63127 | 1 | 1 RN7SL744P      | --     |
| ENSG00000264029 | 5.13E-15 | -2.63127 | 1 | 1 CTD-2008P7.5   | K08496 |
| ENSG00000264030 | 5.13E-15 | -2.63127 | 1 | 1 RN7SL66P       | --     |
| ENSG00000264031 | 5.13E-15 | -2.63127 | 1 | 1 RP11-68I3.2    | --     |
| ENSG00000264032 | 5.13E-15 | -2.63127 | 1 | 1 MIR4491        | --     |
| ENSG00000264034 | 5.13E-15 | -2.63127 | 1 | 1 AC010139.1     | --     |
| ENSG00000264036 | 5.13E-15 | -2.63127 | 1 | 1 RN7SL198P      | --     |
| ENSG00000264037 | 5.13E-15 | -2.63127 | 1 | 1 MIR4472-2      | --     |
| ENSG00000264038 | 5.13E-15 | -2.63127 | 1 | 1 AC091132.2     | --     |
| ENSG00000264039 | 5.13E-15 | -2.63127 | 1 | 1 AC114296.1     | --     |
| ENSG00000264040 | 5.13E-15 | -2.63127 | 1 | 1 RP11-29O13.1   | --     |
| ENSG00000264041 | 5.13E-15 | -2.63127 | 1 | 1 RN7SL670P      | --     |
| ENSG00000264042 | 5.13E-15 | -2.63127 | 1 | 1 AL354833.3     | --     |
| ENSG00000264044 | 5.13E-15 | -2.63127 | 1 | 1 RP11-192H23.7  | --     |
| ENSG00000264045 | 5.13E-15 | -2.63127 | 1 | 1 AC073127.1     | --     |
| ENSG00000264046 | 5.13E-15 | -2.63127 | 1 | 1 RN7SL312P      | --     |
| ENSG00000264047 | 5.13E-15 | -2.63127 | 1 | 1 RN7SL455P      | --     |
| ENSG00000264048 | 5.13E-15 | -2.63127 | 1 | 1 AL121992.1     | --     |
| ENSG00000264049 | 5.13E-15 | -2.63127 | 1 | 1 MIR4737        | --     |



|                 |          |          |   |                  |        |
|-----------------|----------|----------|---|------------------|--------|
| ENSG00000264050 | 5.13E-15 | -2.63127 | 1 | 1 RP11-22N12.2   | --     |
| ENSG00000264051 | 5.13E-15 | -2.63127 | 1 | 1 AC007881.1     | --     |
| ENSG00000264052 | 5.13E-15 | -2.63127 | 1 | 1 MIR3655        | --     |
| ENSG00000264054 | 5.13E-15 | -2.63127 | 1 | 1 RPL31P9        | K02910 |
| ENSG00000264055 | 5.13E-15 | -2.63127 | 1 | 1 AP000261.1     | --     |
| ENSG00000264056 | 5.13E-15 | -2.63127 | 1 | 1 MIR5685        | --     |
| ENSG00000264059 | 5.13E-15 | -2.63127 | 1 | 1 AC013558.1     | --     |
| ENSG00000264060 | 5.13E-15 | -2.63127 | 1 | 1 MIR4316        | --     |
| ENSG00000264061 | 5.13E-15 | -2.63127 | 1 | 1 FGF7P1         | K04358 |
| ENSG00000264062 | 5.13E-15 | -2.63127 | 1 | 1 AC131012.1     | --     |
| ENSG00000264065 | 5.13E-15 | -2.63127 | 1 | 1 RN7SL139P      | --     |
| ENSG00000264066 | 5.13E-15 | -2.63127 | 1 | 1 MIR451B        | --     |
| ENSG00000264069 | 5.13E-15 | -2.63127 | 1 | 1 MIR3943        | --     |
| ENSG00000264070 | 5.13E-15 | -2.63127 | 1 | 1 DND1P1         | --     |
| ENSG00000264071 | 5.13E-15 | -2.63127 | 1 | 1 RN7SL531P      | --     |
| ENSG00000264072 | 5.13E-15 | -2.63127 | 1 | 1 RP11-856M7.4   | --     |
| ENSG00000264073 | 5.13E-15 | -2.63127 | 1 | 1 MIR3199-2      | --     |
| ENSG00000264074 | 5.13E-15 | -2.63127 | 1 | 1 AC110086.1     | --     |
| ENSG00000264075 | 5.13E-15 | -2.63127 | 1 | 1 MIR4783        | --     |
| ENSG00000264076 | 5.13E-15 | -2.63127 | 1 | 1 AL158040.1     | --     |
| ENSG00000264077 | 5.13E-15 | -2.63127 | 1 | 1 AC010196.1     | --     |
| ENSG00000264078 | 5.13E-15 | -2.63127 | 1 | 1 RP11-73M7.9    | --     |
| ENSG00000264079 | 5.13E-15 | -2.63127 | 1 | 1 AC079412.1     | --     |
| ENSG00000264080 | 5.13E-15 | -2.63127 | 1 | 1 CTD-2015H3.1   | --     |
| ENSG00000264081 | 5.13E-15 | -2.63127 | 1 | 1 AL136985.1     | --     |
| ENSG00000264083 | 5.13E-15 | -2.63127 | 1 | 1 RP11-227G15.9  | --     |
| ENSG00000264084 | 5.13E-15 | -2.63127 | 1 | 1 MIR5688        | --     |
| ENSG00000264085 | 5.13E-15 | -2.63127 | 1 | 1 MIR5004        | --     |
| ENSG00000264089 | 5.13E-15 | -2.63127 | 1 | 1 MIR3681        | --     |
| ENSG00000264090 | 5.13E-15 | -2.63127 | 1 | 1 MIR4666B       | --     |
| ENSG00000264092 | 5.13E-15 | -2.63127 | 1 | 1 RN7SL474P      | --     |
| ENSG00000264093 | 5.13E-15 | -2.63127 | 1 | 1 RP11-401F2.2   | K07604 |
| ENSG00000264094 | 5.13E-15 | -2.63127 | 1 | 1 AC022616.1     | --     |
| ENSG00000264095 | 5.13E-15 | -2.63127 | 1 | 1 AP000560.1     | --     |
| ENSG00000264097 | 5.13E-15 | -2.63127 | 1 | 1 AC034187.1     | --     |
| ENSG00000264098 | 5.13E-15 | -2.63127 | 1 | 1 CTD-2350C19.1  | --     |
| ENSG00000264099 | 5.13E-15 | -2.63127 | 1 | 1 MIR4803        | --     |
| ENSG00000264101 | 5.13E-15 | -2.63127 | 1 | 1 MIR4689        | --     |
| ENSG00000264102 | 5.13E-15 | -2.63127 | 1 | 1 MIR4688        | --     |
| ENSG00000264103 | 5.13E-15 | -2.63127 | 1 | 1 AC017028.3     | --     |
| ENSG00000264104 | 5.13E-15 | -2.63127 | 1 | 1 RP11-638L3.4   | K19539 |
| ENSG00000264105 | 5.13E-15 | -2.63127 | 1 | 1 MIR3688-1      | --     |
| ENSG00000264106 | 5.13E-15 | -2.63127 | 1 | 1 AC116562.2     | --     |
| ENSG00000264108 | 5.13E-15 | -2.63127 | 1 | 1 RP11-357H3.1   | --     |
| ENSG00000264110 | 5.13E-15 | -2.63127 | 1 | 1 MIR4300        | --     |
| ENSG00000264113 | 5.13E-15 | -2.63127 | 1 | 1 RN7SL784P      | --     |
| ENSG00000264114 | 5.13E-15 | -2.63127 | 1 | 1 AC063932.1     | --     |
| ENSG00000264115 | 5.13E-15 | -2.63127 | 1 | 1 hsa-mir-3180-4 | --     |
| ENSG00000264116 | 5.13E-15 | -2.63127 | 1 | 1 RP11-321M21.3  | --     |
| ENSG00000264118 | 5.13E-15 | -2.63127 | 1 | 1 RN7SL572P      | --     |
| ENSG00000264119 | 5.13E-15 | -2.63127 | 1 | 1 MIR4795        | --     |
| ENSG00000264120 | 5.13E-15 | -2.63127 | 1 | 1 AF274855.1     | --     |
| ENSG00000264121 | 5.13E-15 | -2.63127 | 1 | 1 AL157775.1     | --     |
| ENSG00000264123 | 5.13E-15 | -2.63127 | 1 | 1 RN7SL599P      | --     |
| ENSG00000264124 | 5.13E-15 | -2.63127 | 1 | 1 AC104687.1     | --     |
| ENSG00000264125 | 5.13E-15 | -2.63127 | 1 | 1 RP11-354P11.4  | --     |
| ENSG00000264126 | 5.13E-15 | -2.63127 | 1 | 1 RN7SL158P      | --     |
| ENSG00000264128 | 5.13E-15 | -2.63127 | 1 | 1 RN7SL713P      | --     |

|                 |          |          |   |                  |        |
|-----------------|----------|----------|---|------------------|--------|
| ENSG00000264129 | 5.13E-15 | -2.63127 | 1 | 1 AC020900.2     | --     |
| ENSG00000264130 | 5.13E-15 | -2.63127 | 1 | 1 AC110794.1     | --     |
| ENSG00000264131 | 5.13E-15 | -2.63127 | 1 | 1 AC007631.1     | --     |
| ENSG00000264133 | 5.13E-15 | -2.63127 | 1 | 1 AC006953.1     | --     |
| ENSG00000264134 | 5.13E-15 | -2.63127 | 1 | 1 AL121893.1     | --     |
| ENSG00000264135 | 5.13E-15 | -2.63127 | 1 | 1 AC104306.2     | --     |
| ENSG00000264136 | 5.13E-15 | -2.63127 | 1 | 1 MIR3689D2      | --     |
| ENSG00000264137 | 5.13E-15 | -2.63127 | 1 | 1 AC079298.1     | --     |
| ENSG00000264138 | 5.13E-15 | -2.63127 | 1 | 1 RP11-20B24.3   | --     |
| ENSG00000264139 | 5.13E-15 | -2.63127 | 1 | 1 MIR3667        | --     |
| ENSG00000264141 | 5.13E-15 | -2.63127 | 1 | 1 MIR3928        | --     |
| ENSG00000264142 | 5.13E-15 | -2.63127 | 1 | 1 AC114969.1     | --     |
| ENSG00000264144 | 5.13E-15 | -2.63127 | 1 | 1 AC105049.1     | --     |
| ENSG00000264146 | 5.13E-15 | -2.63127 | 1 | 1 AC021654.1     | --     |
| ENSG00000264147 | 5.13E-15 | -2.63127 | 1 | 1 MIR4763        | --     |
| ENSG00000264148 | 5.13E-15 | -2.63127 | 1 | 1 RP11-848P1.7   | K06630 |
| ENSG00000264149 | 5.13E-15 | -2.63127 | 1 | 1 RP11-268I9.3   | --     |
| ENSG00000264150 | 5.13E-15 | -2.63127 | 1 | 1 RP11-715F3.1   | K10704 |
| ENSG00000264151 | 5.13E-15 | -2.63127 | 1 | 1 RP11-739N10.1  | --     |
| ENSG00000264155 | 5.13E-15 | -2.63127 | 1 | 1 AC090015.1     | --     |
| ENSG00000264157 | 5.13E-15 | -2.63127 | 1 | 1 MIR3127        | --     |
| ENSG00000264158 | 5.13E-15 | -2.63127 | 1 | 1 MIR4670        | --     |
| ENSG00000264159 | 5.13E-15 | -2.63127 | 1 | 1 RN7SL866P      | --     |
| ENSG00000264160 | 5.13E-15 | -2.63127 | 1 | 1 MIR4762        | --     |
| ENSG00000264163 | 5.13E-15 | -2.63127 | 1 | 1 MIR3689B       | --     |
| ENSG00000264164 | 5.13E-15 | -2.63127 | 1 | 1 RP11-640N20.6  | K11728 |
| ENSG00000264166 | 5.13E-15 | -2.63127 | 1 | 1 RN7SL115P      | --     |
| ENSG00000264167 | 5.13E-15 | -2.63127 | 1 | 1 RP1-253P7.1    | --     |
| ENSG00000264168 | 5.13E-15 | -2.63127 | 1 | 1 MTND1P15       | K03878 |
| ENSG00000264169 | 5.13E-15 | -2.63127 | 1 | 1 RN7SL665P      | --     |
| ENSG00000264172 | 5.13E-15 | -2.63127 | 1 | 1 PDLIM1P3       | --     |
| ENSG00000264173 | 5.13E-15 | -2.63127 | 1 | 1 MIR3175        | --     |
| ENSG00000264174 | 5.13E-15 | -2.63127 | 1 | 1 RP11-212E8.1   | --     |
| ENSG00000264178 | 5.13E-15 | -2.63127 | 1 | 1 AC137674.1     | --     |
| ENSG00000264179 | 5.13E-15 | -2.63127 | 1 | 1 RP11-672L10.5  | K03031 |
| ENSG00000264181 | 5.13E-15 | -2.63127 | 1 | 1 AL713997.1     | --     |
| ENSG00000264182 | 5.13E-15 | -2.63127 | 1 | 1 AC126763.1     | --     |
| ENSG00000264183 | 5.13E-15 | -2.63127 | 1 | 1 AC091038.1     | --     |
| ENSG00000264184 | 5.13E-15 | -2.63127 | 1 | 1 AC096509.1     | --     |
| ENSG00000264186 | 5.13E-15 | -2.63127 | 1 | 1 RP11-737O24.4  | K11095 |
| ENSG00000264188 | 5.13E-15 | -2.63127 | 1 | 1 RP11-13N13.5   | --     |
| ENSG00000264189 | 5.13E-15 | -2.63127 | 1 | 1 CTD-2533G20.1  | --     |
| ENSG00000264192 | 5.13E-15 | -2.63127 | 1 | 1 RN7SL117P      | --     |
| ENSG00000264193 | 5.13E-15 | -2.63127 | 1 | 1 RP11-737G21.1  | --     |
| ENSG00000264194 | 5.13E-15 | -2.63127 | 1 | 1 AC000003.2     | K17985 |
| ENSG00000264196 | 5.13E-15 | -2.63127 | 1 | 1 RP11-171G2.1   | --     |
| ENSG00000264198 | 5.13E-15 | -2.63127 | 1 | 1 RP11-94L15.2   | --     |
| ENSG00000264200 | 5.13E-15 | -2.63127 | 1 | 1 MIR4693        | --     |
| ENSG00000264201 | 5.13E-15 | -2.63127 | 1 | 1 MIR4701        | --     |
| ENSG00000264203 | 5.13E-15 | -2.63127 | 1 | 1 AC092377.1     | --     |
| ENSG00000264205 | 5.13E-15 | -2.63127 | 1 | 1 RN7SL71P       | --     |
| ENSG00000264206 | 5.13E-15 | -2.63127 | 1 | 1 AL590391.1     | --     |
| ENSG00000264207 | 5.13E-15 | -2.63127 | 1 | 1 RP11-196G18.23 | --     |
| ENSG00000264208 | 5.13E-15 | -2.63127 | 1 | 1 MIR4781        | --     |
| ENSG00000264209 | 5.13E-15 | -2.63127 | 1 | 1 AC104448.1     | --     |
| ENSG00000264210 | 5.13E-15 | -2.63127 | 1 | 1 MIR4716        | --     |
| ENSG00000264211 | 5.13E-15 | -2.63127 | 1 | 1 MIR4492        | --     |
| ENSG00000264212 | 5.13E-15 | -2.63127 | 1 | 1 RP11-94B19.3   | --     |

|                 |          |          |   |                  |        |
|-----------------|----------|----------|---|------------------|--------|
| ENSG00000264215 | 5.13E-15 | -2.63127 | 1 | 1 RP11-283C24.1  | --     |
| ENSG00000264222 | 5.13E-15 | -2.63127 | 1 | 1 RP11-757O6.1   | --     |
| ENSG00000264225 | 5.13E-15 | -2.63127 | 1 | 1 RN7SL730P      | --     |
| ENSG00000264226 | 5.13E-15 | -2.63127 | 1 | 1 MIR3168        | --     |
| ENSG00000264227 | 5.13E-15 | -2.63127 | 1 | 1 RN7SL227P      | --     |
| ENSG00000264231 | 5.13E-15 | -2.63127 | 1 | 1 AC026241.1     | --     |
| ENSG00000264232 | 5.13E-15 | -2.63127 | 1 | 1 RP11-453M23.1  | --     |
| ENSG00000264233 | 5.13E-15 | -2.63127 | 1 | 1 MIR4456        | --     |
| ENSG00000264234 | 5.13E-15 | -2.63127 | 1 | 1 AL161751.1     | --     |
| ENSG00000264236 | 5.13E-15 | -2.63127 | 1 | 1 RP11-861L17.2  | --     |
| ENSG00000264238 | 5.13E-15 | -2.63127 | 1 | 1 AL590084.1     | --     |
| ENSG00000264239 | 5.13E-15 | -2.63127 | 1 | 1 AL360297.1     | --     |
| ENSG00000264240 | 5.13E-15 | -2.63127 | 1 | 1 RP11-19P22.6   | K07752 |
| ENSG00000264241 | 5.13E-15 | -2.63127 | 1 | 1 AL138721.1     | --     |
| ENSG00000264242 | 5.13E-15 | -2.63127 | 1 | 1 RP11-271K11.1  | K11837 |
| ENSG00000264243 | 5.13E-15 | -2.63127 | 1 | 1 RP11-6N17.1    | --     |
| ENSG00000264245 | 5.13E-15 | -2.63127 | 1 | 1 RP11-822E23.4  | --     |
| ENSG00000264246 | 5.13E-15 | -2.63127 | 1 | 1 RP11-138C24.2  | --     |
| ENSG00000264248 | 5.13E-15 | -2.63127 | 1 | 1 AL603831.1     | --     |
| ENSG00000264249 | 5.13E-15 | -2.63127 | 1 | 1 MIR3912        | --     |
| ENSG00000264250 | 5.13E-15 | -2.63127 | 1 | 1 RN7SL835P      | --     |
| ENSG00000264251 | 5.13E-15 | -2.63127 | 1 | 1 RN7SL819P      | --     |
| ENSG00000264254 | 5.13E-15 | -2.63127 | 1 | 1 CTD-3096M3.1   | --     |
| ENSG00000264255 | 5.13E-15 | -2.63127 | 1 | 1 RN7SL463P      | --     |
| ENSG00000264257 | 5.13E-15 | -2.63127 | 1 | 1 KIR3DP1        | K07982 |
| ENSG00000264260 | 5.13E-15 | -2.63127 | 1 | 1 RP11-94B19.1   | --     |
| ENSG00000264261 | 5.13E-15 | -2.63127 | 1 | 1 AC024908.1     | --     |
| ENSG00000264262 | 5.13E-15 | -2.63127 | 1 | 1 RP11-285M22.3  | --     |
| ENSG00000264263 | 5.13E-15 | -2.63127 | 1 | 1 RP11-671P2.1   | --     |
| ENSG00000264266 | 5.13E-15 | -2.63127 | 1 | 1 MIR4322        | --     |
| ENSG00000264267 | 5.13E-15 | -2.63127 | 1 | 1 AC069303.1     | --     |
| ENSG00000264268 | 5.13E-15 | -2.63127 | 1 | 1 MIR4767        | --     |
| ENSG00000264270 | 5.13E-15 | -2.63127 | 1 | 1 RP11-474I11.7  | --     |
| ENSG00000264271 | 5.13E-15 | -2.63127 | 1 | 1 RN7SL488P      | --     |
| ENSG00000264272 | 5.13E-15 | -2.63127 | 1 | 1 CTD-2514K5.4   | --     |
| ENSG00000264274 | 5.13E-15 | -2.63127 | 1 | 1 MIR4799        | --     |
| ENSG00000264275 | 5.13E-15 | -2.63127 | 1 | 1 RN7SL753P      | --     |
| ENSG00000264276 | 5.13E-15 | -2.63127 | 1 | 1 RN7SL287P      | --     |
| ENSG00000264277 | 5.13E-15 | -2.63127 | 1 | 1 AC011073.1     | --     |
| ENSG00000264280 | 5.13E-15 | -2.63127 | 1 | 1 RN7SL322P      | --     |
| ENSG00000264283 | 5.13E-15 | -2.63127 | 1 | 1 AC025300.1     | --     |
| ENSG00000264284 | 5.13E-15 | -2.63127 | 1 | 1 AL391380.1     | --     |
| ENSG00000264286 | 5.13E-15 | -2.63127 | 1 | 1 AL138930.2     | --     |
| ENSG00000264288 | 5.13E-15 | -2.63127 | 1 | 1 AL138999.1     | --     |
| ENSG00000264289 | 5.13E-15 | -2.63127 | 1 | 1 RP11-268I9.4   | K09550 |
| ENSG00000264292 | 5.13E-15 | -2.63127 | 1 | 1 MIR2467        | --     |
| ENSG00000264293 | 5.13E-15 | -2.63127 | 1 | 1 RN7SL657P      | --     |
| ENSG00000264294 | 5.13E-15 | -2.63127 | 1 | 1 SNORD55        | --     |
| ENSG00000264295 | 5.13E-15 | -2.63127 | 1 | 1 MIR3922        | --     |
| ENSG00000264296 | 5.13E-15 | -2.63127 | 1 | 1 RP11-116K4.1   | K09228 |
| ENSG00000264297 | 5.13E-15 | -2.63127 | 1 | 1 MIR4433        | --     |
| ENSG00000264298 | 5.13E-15 | -2.63127 | 1 | 1 AL353803.1     | --     |
| ENSG00000264299 | 5.13E-15 | -2.63127 | 1 | 1 RP11-680F20.12 | --     |
| ENSG00000264300 | 5.13E-15 | -2.63127 | 1 | 1 RP11-640N20.1  | K11728 |
| ENSG00000264301 | 5.13E-15 | -2.63127 | 1 | 1 RP11-527H14.3  | --     |
| ENSG00000264302 | 5.13E-15 | -2.63127 | 1 | 1 MIR4723        | --     |
| ENSG00000264303 | 5.13E-15 | -2.63127 | 1 | 1 AC011410.1     | --     |
| ENSG00000264305 | 5.13E-15 | -2.63127 | 1 | 1 RN7SL99P       | --     |

|                 |          |          |   |                 |        |
|-----------------|----------|----------|---|-----------------|--------|
| ENSG00000264306 | 5.13E-15 | -2.63127 | 1 | 1 AC104304.2    | --     |
| ENSG00000264309 | 5.13E-15 | -2.63127 | 1 | 1 MIR4694       | --     |
| ENSG00000264310 | 5.13E-15 | -2.63127 | 1 | 1 AL157883.1    | --     |
| ENSG00000264311 | 5.13E-15 | -2.63127 | 1 | 1 CCDC58P1      | K16741 |
| ENSG00000264312 | 5.13E-15 | -2.63127 | 1 | 1 RN7SL642P     | --     |
| ENSG00000264313 | 5.13E-15 | -2.63127 | 1 | 1 RN7SL644P     | --     |
| ENSG00000264314 | 5.13E-15 | -2.63127 | 1 | 1 MIR548AT      | --     |
| ENSG00000264315 | 5.13E-15 | -2.63127 | 1 | 1 HNRNPA1P11    | K12741 |
| ENSG00000264316 | 5.13E-15 | -2.63127 | 1 | 1 RP11-846F4.9  | K02262 |
| ENSG00000264318 | 5.13E-15 | -2.63127 | 1 | 1 RN7SL802P     | --     |
| ENSG00000264319 | 5.13E-15 | -2.63127 | 1 | 1 MIR4801       | --     |
| ENSG00000264321 | 5.13E-15 | -2.63127 | 1 | 1 AL358134.1    | --     |
| ENSG00000264322 | 5.13E-15 | -2.63127 | 1 | 1 RN7SL448P     | --     |
| ENSG00000264323 | 5.13E-15 | -2.63127 | 1 | 1 AC093887.1    | --     |
| ENSG00000264326 | 5.13E-15 | -2.63127 | 1 | 1 MIR4657       | --     |
| ENSG00000264327 | 5.13E-15 | -2.63127 | 1 | 1 AC024149.1    | --     |
| ENSG00000264328 | 5.13E-15 | -2.63127 | 1 | 1 RN7SL781P     | --     |
| ENSG00000264330 | 5.13E-15 | -2.63127 | 1 | 1 MIR5186       | --     |
| ENSG00000264331 | 5.13E-15 | -2.63127 | 1 | 1 AC003035.1    | --     |
| ENSG00000264332 | 5.13E-15 | -2.63127 | 1 | 1 AC111194.1    | --     |
| ENSG00000264333 | 5.13E-15 | -2.63127 | 1 | 1 AC020915.1    | --     |
| ENSG00000264334 | 5.13E-15 | -2.63127 | 1 | 1 RP11-671C19.2 | --     |
| ENSG00000264336 | 5.13E-15 | -2.63127 | 1 | 1 AC140479.1    | --     |
| ENSG00000264338 | 5.13E-15 | -2.63127 | 1 | 1 AL359973.1    | --     |
| ENSG00000264339 | 5.13E-15 | -2.63127 | 1 | 1 RP11-769O8.2  | --     |
| ENSG00000264340 | 5.13E-15 | -2.63127 | 1 | 1 RP11-231E4.3  | --     |
| ENSG00000264341 | 5.13E-15 | -2.63127 | 1 | 1 MIR4417       | --     |
| ENSG00000264342 | 5.13E-15 | -2.63127 | 1 | 1 MIR3660       | --     |
| ENSG00000264344 | 5.13E-15 | -2.63127 | 1 | 1 AP000936.2    | --     |
| ENSG00000264345 | 5.13E-15 | -2.63127 | 1 | 1 RP11-958F21.1 | --     |
| ENSG00000264346 | 5.13E-15 | -2.63127 | 1 | 1 SNORA77       | --     |
| ENSG00000264347 | 5.13E-15 | -2.63127 | 1 | 1 RN7SL24P      | --     |
| ENSG00000264352 | 5.13E-15 | -2.63127 | 1 | 1 RN7SL602P     | --     |
| ENSG00000264354 | 5.13E-15 | -2.63127 | 1 | 1 MIR3134       | --     |
| ENSG00000264355 | 5.13E-15 | -2.63127 | 1 | 1 AC008738.2    | --     |
| ENSG00000264356 | 5.13E-15 | -2.63127 | 1 | 1 RN7SL763P     | --     |
| ENSG00000264357 | 5.13E-15 | -2.63127 | 1 | 1 MIR4648       | --     |
| ENSG00000264358 | 5.13E-15 | -2.63127 | 1 | 1 MIR3122       | --     |
| ENSG00000264359 | 5.13E-15 | -2.63127 | 1 | 1 NEK4P2        | --     |
| ENSG00000264361 | 5.13E-15 | -2.63127 | 1 | 1 RN7SL607P     | --     |
| ENSG00000264362 | 5.13E-15 | -2.63127 | 1 | 1 AC093875.1    | --     |
| ENSG00000264365 | 5.13E-15 | -2.63127 | 1 | 1 RP11-621L6.2  | --     |
| ENSG00000264366 | 5.13E-15 | -2.63127 | 1 | 1 Z95400.1      | --     |
| ENSG00000264370 | 5.13E-15 | -2.63127 | 1 | 1 MIR3125       | --     |
| ENSG00000264371 | 5.13E-15 | -2.63127 | 1 | 1 MIR4425       | --     |
| ENSG00000264372 | 5.13E-15 | -2.63127 | 1 | 1 AC108519.1    | --     |
| ENSG00000264373 | 5.13E-15 | -2.63127 | 1 | 1 RP11-227G15.6 | K03574 |
| ENSG00000264374 | 5.13E-15 | -2.63127 | 1 | 1 AL357115.1    | --     |
| ENSG00000264376 | 5.13E-15 | -2.63127 | 1 | 1 RN7SL613P     | --     |
| ENSG00000264378 | 5.13E-15 | -2.63127 | 1 | 1 AC116533.2    | --     |
| ENSG00000264379 | 5.13E-15 | -2.63127 | 1 | 1 SNORD39       | --     |
| ENSG00000264380 | 5.13E-15 | -2.63127 | 1 | 1 AL590113.1    | --     |
| ENSG00000264382 | 5.13E-15 | -2.63127 | 1 | 1 AC007881.2    | --     |
| ENSG00000264383 | 5.13E-15 | -2.63127 | 1 | 1 AC068014.1    | --     |
| ENSG00000264385 | 5.13E-15 | -2.63127 | 1 | 1 RN7SL421P     | --     |
| ENSG00000264386 | 5.13E-15 | -2.63127 | 1 | 1 MIR4513       | --     |
| ENSG00000264387 | 5.13E-15 | -2.63127 | 1 | 1 MIR5007       | --     |
| ENSG00000264388 | 5.13E-15 | -2.63127 | 1 | 1 RP11-752P2.1  | --     |

|                 |          |          |   |                 |        |
|-----------------|----------|----------|---|-----------------|--------|
| ENSG00000264390 | 5.13E-15 | -2.63127 | 1 | 1 MIR4465       | --     |
| ENSG00000264391 | 5.13E-15 | -2.63127 | 1 | 1 RN7SL208P     | --     |
| ENSG00000264392 | 5.13E-15 | -2.63127 | 1 | 1 AC002477.1    | --     |
| ENSG00000264395 | 5.13E-15 | -2.63127 | 1 | 1 MIR3193       | --     |
| ENSG00000264396 | 5.13E-15 | -2.63127 | 1 | 1 RN7SL264P     | --     |
| ENSG00000264397 | 5.13E-15 | -2.63127 | 1 | 1 MIR3180-5     | --     |
| ENSG00000264398 | 5.13E-15 | -2.63127 | 1 | 1 AL031601.1    | --     |
| ENSG00000264399 | 5.13E-15 | -2.63127 | 1 | 1 MIR4736       | --     |
| ENSG00000264400 | 5.13E-15 | -2.63127 | 1 | 1 RN7SL491P     | --     |
| ENSG00000264402 | 5.13E-15 | -2.63127 | 1 | 1 MIR548AL      | --     |
| ENSG00000264405 | 5.13E-15 | -2.63127 | 1 | 1 MIR3913-1     | --     |
| ENSG00000264406 | 5.13E-15 | -2.63127 | 1 | 1 MIR548AP      | --     |
| ENSG00000264407 | 5.13E-15 | -2.63127 | 1 | 1 RN7SL528P     | --     |
| ENSG00000264409 | 5.13E-15 | -2.63127 | 1 | 1 AC113195.1    | --     |
| ENSG00000264410 | 5.13E-15 | -2.63127 | 1 | 1 AL121931.1    | --     |
| ENSG00000264413 | 5.13E-15 | -2.63127 | 1 | 1 AC011495.1    | --     |
| ENSG00000264419 | 5.13E-15 | -2.63127 | 1 | 1 MIR548AC      | --     |
| ENSG00000264420 | 5.13E-15 | -2.63127 | 1 | 1 AL158111.1    | --     |
| ENSG00000264421 | 5.13E-15 | -2.63127 | 1 | 1 RP11-401F2.4  | --     |
| ENSG00000264422 | 5.13E-15 | -2.63127 | 1 | 1 RP11-434D2.12 | --     |
| ENSG00000264423 | 5.13E-15 | -2.63127 | 1 | 1 RN7SL718P     | --     |
| ENSG00000264426 | 5.13E-15 | -2.63127 | 1 | 1 MIR4283-2     | --     |
| ENSG00000264428 | 5.13E-15 | -2.63127 | 1 | 1 AL691523.1    | --     |
| ENSG00000264429 | 5.13E-15 | -2.63127 | 1 | 1 MIR3183       | --     |
| ENSG00000264431 | 5.13E-15 | -2.63127 | 1 | 1 RP11-285M22.2 | K06632 |
| ENSG00000264433 | 5.13E-15 | -2.63127 | 1 | 1 RP11-720L2.3  | --     |
| ENSG00000264434 | 5.13E-15 | -2.63127 | 1 | 1 CTD-2006O16.2 | --     |
| ENSG00000264437 | 5.13E-15 | -2.63127 | 1 | 1 AC091517.1    | --     |
| ENSG00000264438 | 5.13E-15 | -2.63127 | 1 | 1 RN7SL560P     | --     |
| ENSG00000264439 | 5.13E-15 | -2.63127 | 1 | 1 AL136001.1    | --     |
| ENSG00000264441 | 5.13E-15 | -2.63127 | 1 | 1 AC006539.1    | --     |
| ENSG00000264442 | 5.13E-15 | -2.63127 | 1 | 1 RN7SL119P     | --     |
| ENSG00000264443 | 5.13E-15 | -2.63127 | 1 | 1 RP4-594I10.3  | --     |
| ENSG00000264444 | 5.13E-15 | -2.63127 | 1 | 1 SDHCP1        | K00236 |
| ENSG00000264445 | 5.13E-15 | -2.63127 | 1 | 1 AC087269.2    | --     |
| ENSG00000264446 | 5.13E-15 | -2.63127 | 1 | 1 AC046130.1    | --     |
| ENSG00000264447 | 5.13E-15 | -2.63127 | 1 | 1 AL445256.1    | --     |
| ENSG00000264449 | 5.13E-15 | -2.63127 | 1 | 1 RP11-945C19.4 | --     |
| ENSG00000264451 | 5.13E-15 | -2.63127 | 1 | 1 RP11-433M22.2 | --     |
| ENSG00000264452 | 5.13E-15 | -2.63127 | 1 | 1 snoZ6         | --     |
| ENSG00000264453 | 5.13E-15 | -2.63127 | 1 | 1 AC003006.1    | --     |
| ENSG00000264454 | 5.13E-15 | -2.63127 | 1 | 1 AL049745.1    | --     |
| ENSG00000264455 | 5.13E-15 | -2.63127 | 1 | 1 MIR4721       | --     |
| ENSG00000264458 | 5.13E-15 | -2.63127 | 1 | 1 RP11-220C2.1  | --     |
| ENSG00000264461 | 5.13E-15 | -2.63127 | 1 | 1 RN7SL179P     | --     |
| ENSG00000264463 | 5.13E-15 | -2.63127 | 1 | 1 AC090133.1    | --     |
| ENSG00000264464 | 5.13E-15 | -2.63127 | 1 | 1 RP11-110H1.8  | --     |
| ENSG00000264465 | 5.13E-15 | -2.63127 | 1 | 1 AC008938.1    | --     |
| ENSG00000264467 | 5.13E-15 | -2.63127 | 1 | 1 RN7SL29P      | --     |
| ENSG00000264468 | 5.13E-15 | -2.63127 | 1 | 1 MIR4520A      | --     |
| ENSG00000264470 | 5.13E-15 | -2.63127 | 1 | 1 MIR4794       | --     |
| ENSG00000264471 | 5.13E-15 | -2.63127 | 1 | 1 MIR4467       | --     |
| ENSG00000264472 | 5.13E-15 | -2.63127 | 1 | 1 RP11-861L17.3 | --     |
| ENSG00000264473 | 5.13E-15 | -2.63127 | 1 | 1 hsa-mir-4538  | --     |
| ENSG00000264474 | 5.13E-15 | -2.63127 | 1 | 1 MIR4656       | --     |
| ENSG00000264477 | 5.13E-15 | -2.63127 | 1 | 1 MIR5682       | --     |
| ENSG00000264478 | 5.13E-15 | -2.63127 | 1 | 1 AC100767.1    | --     |
| ENSG00000264479 | 5.13E-15 | -2.63127 | 1 | 1 AC023824.1    | --     |

|                 |          |          |   |                   |        |
|-----------------|----------|----------|---|-------------------|--------|
| ENSG00000264480 | 5.13E-15 | -2.63127 | 1 | 1 MIR4714         | --     |
| ENSG00000264482 | 5.13E-15 | -2.63127 | 1 | 1 MIR4705         | --     |
| ENSG00000264484 | 5.13E-15 | -2.63127 | 1 | 1 RN7SL697P       | --     |
| ENSG00000264485 | 5.13E-15 | -2.63127 | 1 | 1 RN7SL627P       | --     |
| ENSG00000264486 | 5.13E-15 | -2.63127 | 1 | 1 CTD-2008P7.3    | --     |
| ENSG00000264488 | 5.13E-15 | -2.63127 | 1 | 1 RP11-605F20.1   | --     |
| ENSG00000264489 | 5.13E-15 | -2.63127 | 1 | 1 AC120120.1      | --     |
| ENSG00000264490 | 5.13E-15 | -2.63127 | 1 | 1 WI2-87327B8.1   | --     |
| ENSG00000264491 | 5.13E-15 | -2.63127 | 1 | 1 RP11-349A8.3    | --     |
| ENSG00000264493 | 5.13E-15 | -2.63127 | 1 | 1 MIR4298         | --     |
| ENSG00000264494 | 5.13E-15 | -2.63127 | 1 | 1 MIR4650-2       | --     |
| ENSG00000264497 | 5.13E-15 | -2.63127 | 1 | 1 RP11-640N20.5   | --     |
| ENSG00000264500 | 5.13E-15 | -2.63127 | 1 | 1 MIR3124         | --     |
| ENSG00000264501 | 5.13E-15 | -2.63127 | 1 | 1 RN7SL731P       | --     |
| ENSG00000264502 | 5.13E-15 | -2.63127 | 1 | 1 AC024590.1      | --     |
| ENSG00000264503 | 5.13E-15 | -2.63127 | 1 | 1 RP11-856M7.7    | --     |
| ENSG00000264505 | 5.13E-15 | -2.63127 | 1 | 1 MIR4534         | --     |
| ENSG00000264510 | 5.13E-15 | -2.63127 | 1 | 1 BX649553.3      | --     |
| ENSG00000264511 | 5.13E-15 | -2.63127 | 1 | 1 MIR3678         | --     |
| ENSG00000264512 | 5.13E-15 | -2.63127 | 1 | 1 MIR5692A1       | --     |
| ENSG00000264513 | 5.13E-15 | -2.63127 | 1 | 1 RP11-556O9.2    | --     |
| ENSG00000264514 | 5.13E-15 | -2.63127 | 1 | 1 RP11-720L2.4    | --     |
| ENSG00000264515 | 5.13E-15 | -2.63127 | 1 | 1 CTC-525D6.1     | --     |
| ENSG00000264517 | 5.13E-15 | -2.63127 | 1 | 1 AC003001.1      | --     |
| ENSG00000264518 | 5.13E-15 | -2.63127 | 1 | 1 AC017028.4      | --     |
| ENSG00000264519 | 5.13E-15 | -2.63127 | 1 | 1 RN7SL596P       | --     |
| ENSG00000264523 | 5.13E-15 | -2.63127 | 1 | 1 RP11-158I9.7    | --     |
| ENSG00000264525 | 5.13E-15 | -2.63127 | 1 | 1 MIR4778         | --     |
| ENSG00000264526 | 5.13E-15 | -2.63127 | 1 | 1 AL136123.1      | --     |
| ENSG00000264527 | 5.13E-15 | -2.63127 | 1 | 1 WI2-1959D15.1   | --     |
| ENSG00000264529 | 5.13E-15 | -2.63127 | 1 | 1 RP11-556O9.3    | K09512 |
| ENSG00000264530 | 5.13E-15 | -2.63127 | 1 | 1 RN7SL25P        | --     |
| ENSG00000264531 | 5.13E-15 | -2.63127 | 1 | 1 RN7SL641P       | --     |
| ENSG00000264534 | 5.13E-15 | -2.63127 | 1 | 1 MIR378B         | --     |
| ENSG00000264535 | 5.13E-15 | -2.63127 | 1 | 1 AC093788.1      | --     |
| ENSG00000264536 | 5.13E-15 | -2.63127 | 1 | 1 MIR5706         | --     |
| ENSG00000264539 | 5.13E-15 | -2.63127 | 1 | 1 MIR548AR        | --     |
| ENSG00000264540 | 5.13E-15 | -2.63127 | 1 | 1 RN7SL405P       | --     |
| ENSG00000264541 | 5.13E-15 | -2.63127 | 1 | 1 AL162381.1      | --     |
| ENSG00000264542 | 5.13E-15 | -2.63127 | 1 | 1 AP001282.1      | --     |
| ENSG00000264543 | 5.13E-15 | -2.63127 | 1 | 1 RP11-744K17.7   | --     |
| ENSG00000264544 | 5.13E-15 | -2.63127 | 1 | 1 AL355512.2      | --     |
| ENSG00000264545 | 5.13E-15 | -2.63127 | 1 | 1 RP11-145E5.5    | K00772 |
| ENSG00000264546 | 5.13E-15 | -2.63127 | 1 | 1 RP11-464D20.6   | --     |
| ENSG00000264549 | 5.13E-15 | -2.63127 | 1 | 1 SNORD95         | --     |
| ENSG00000264551 | 5.13E-15 | -2.63127 | 1 | 1 AC099791.1      | --     |
| ENSG00000264552 | 5.13E-15 | -2.63127 | 1 | 1 AC105030.1      | --     |
| ENSG00000264553 | 5.13E-15 | -2.63127 | 1 | 1 MIR4257         | --     |
| ENSG00000264558 | 5.13E-15 | -2.63127 | 1 | 1 RP11-138C9.1    | --     |
| ENSG00000264559 | 5.13E-15 | -2.63127 | 1 | 1 MIR3162         | --     |
| ENSG00000264560 | 5.13E-15 | -2.63127 | 1 | 1 AC073973.1      | --     |
| ENSG00000264562 | 5.13E-15 | -2.63127 | 1 | 1 RP11-1109M24.12 | --     |
| ENSG00000264563 | 5.13E-15 | -2.63127 | 1 | 1 MIR4633         | --     |
| ENSG00000264564 | 5.13E-15 | -2.63127 | 1 | 1 RP11-61D1.2     | --     |
| ENSG00000264566 | 5.13E-15 | -2.63127 | 1 | 1 MIR23C          | --     |
| ENSG00000264567 | 5.13E-15 | -2.63127 | 1 | 1 AL391803.1      | --     |
| ENSG00000264569 | 5.13E-15 | -2.63127 | 1 | 1 RP13-650J16.1   | --     |
| ENSG00000264570 | 5.13E-15 | -2.63127 | 1 | 1 SNX19P3         | K17930 |

|                 |          |          |   |                 |        |
|-----------------|----------|----------|---|-----------------|--------|
| ENSG00000264571 | 5.13E-15 | -2.63127 | 1 | 1 MIR4529       | --     |
| ENSG00000264574 | 5.13E-15 | -2.63127 | 1 | 1 MIR1254-2     | --     |
| ENSG00000264576 | 5.13E-15 | -2.63127 | 1 | 1 AC104012.1    | --     |
| ENSG00000264578 | 5.13E-15 | -2.63127 | 1 | 1 RP11-360L9.8  | --     |
| ENSG00000264580 | 5.13E-15 | -2.63127 | 1 | 1 MIR5692B      | --     |
| ENSG00000264582 | 5.13E-15 | -2.63127 | 1 | 1 RN7SL326P     | --     |
| ENSG00000264583 | 5.13E-15 | -2.63127 | 1 | 1 MIR4487       | --     |
| ENSG00000264585 | 5.13E-15 | -2.63127 | 1 | 1 MIR4449       | --     |
| ENSG00000264587 | 5.13E-15 | -2.63127 | 1 | 1 RP11-784B15.1 | --     |
| ENSG00000264588 | 5.13E-15 | -2.63127 | 1 | 1 RN7SL872P     | --     |
| ENSG00000264589 | 5.13E-15 | -2.63127 | 1 | 1 MAPT-AS1      | --     |
| ENSG00000264592 | 5.13E-15 | -2.63127 | 1 | 1 RN7SL131P     | --     |
| ENSG00000264594 | 5.13E-15 | -2.63127 | 1 | 1 MIR4640       | --     |
| ENSG00000264595 | 5.13E-15 | -2.63127 | 1 | 1 RP11-94B19.5  | --     |
| ENSG00000264596 | 5.13E-15 | -2.63127 | 1 | 1 RP11-678G15.1 | --     |
| ENSG00000264598 | 5.13E-15 | -2.63127 | 1 | 1 RP1-29G21.1   | --     |
| ENSG00000264599 | 5.13E-15 | -2.63127 | 1 | 1 AL109754.1    | --     |
| ENSG00000264600 | 5.13E-15 | -2.63127 | 1 | 1 RN7SL595P     | --     |
| ENSG00000264603 | 5.13E-15 | -2.63127 | 1 | 1 MIR3159       | --     |
| ENSG00000264604 | 5.13E-15 | -2.63127 | 1 | 1 AL158069.1    | --     |
| ENSG00000264605 | 5.13E-15 | -2.63127 | 1 | 1 AC004895.1    | --     |
| ENSG00000264607 | 5.13E-15 | -2.63127 | 1 | 1 MIR3173       | --     |
| ENSG00000264609 | 5.13E-15 | -2.63127 | 1 | 1 AL603910.1    | --     |
| ENSG00000264610 | 5.13E-15 | -2.63127 | 1 | 1 MIR4685       | --     |
| ENSG00000264612 | 5.13E-15 | -2.63127 | 1 | 1 AP000539.1    | --     |
| ENSG00000264613 | 5.13E-15 | -2.63127 | 1 | 1 RN7SL290P     | --     |
| ENSG00000264614 | 5.13E-15 | -2.63127 | 1 | 1 MIR5588       | --     |
| ENSG00000264615 | 5.13E-15 | -2.63127 | 1 | 1 RN7SL592P     | --     |
| ENSG00000264616 | 5.13E-15 | -2.63127 | 1 | 1 MIR4755       | --     |
| ENSG00000264617 | 5.13E-15 | -2.63127 | 1 | 1 AC144838.3    | --     |
| ENSG00000264618 | 5.13E-15 | -2.63127 | 1 | 1 RN7SL732P     | --     |
| ENSG00000264620 | 5.13E-15 | -2.63127 | 1 | 1 AL139022.1    | --     |
| ENSG00000264621 | 5.13E-15 | -2.63127 | 1 | 1 MIR5591       | --     |
| ENSG00000264622 | 5.13E-15 | -2.63127 | 1 | 1 RP11-642M2.1  | --     |
| ENSG00000264623 | 5.13E-15 | -2.63127 | 1 | 1 MIR4796       | --     |
| ENSG00000264624 | 5.13E-15 | -2.63127 | 1 | 1 MIR3615       | --     |
| ENSG00000264625 | 5.13E-15 | -2.63127 | 1 | 1 RN7SL859P     | --     |
| ENSG00000264626 | 5.13E-15 | -2.63127 | 1 | 1 RN7SL769P     | --     |
| ENSG00000264628 | 5.13E-15 | -2.63127 | 1 | 1 RN7SL565P     | --     |
| ENSG00000264629 | 5.13E-15 | -2.63127 | 1 | 1 D87007.1      | --     |
| ENSG00000264630 | 5.13E-15 | -2.63127 | 1 | 1 RP11-4F22.2   | --     |
| ENSG00000264631 | 5.13E-15 | -2.63127 | 1 | 1 RN7SL742P     | --     |
| ENSG00000264633 | 5.13E-15 | -2.63127 | 1 | 1 MIR4271       | --     |
| ENSG00000264634 | 5.13E-15 | -2.63127 | 1 | 1 RP11-659F24.1 | --     |
| ENSG00000264637 | 5.13E-15 | -2.63127 | 1 | 1 AC110283.1    | --     |
| ENSG00000264638 | 5.13E-15 | -2.63127 | 1 | 1 MIR3152       | --     |
| ENSG00000264641 | 5.13E-15 | -2.63127 | 1 | 1 AL354928.1    | --     |
| ENSG00000264642 | 5.13E-15 | -2.63127 | 1 | 1 AC005088.1    | --     |
| ENSG00000264643 | 5.13E-15 | -2.63127 | 1 | 1 RP11-118G23.2 | --     |
| ENSG00000264644 | 5.13E-15 | -2.63127 | 1 | 1 KRT18P8       | K07604 |
| ENSG00000264645 | 5.13E-15 | -2.63127 | 1 | 1 AC010528.1    | --     |
| ENSG00000264650 | 5.13E-15 | -2.63127 | 1 | 1 AL359473.1    | --     |
| ENSG00000264652 | 5.13E-15 | -2.63127 | 1 | 1 MIR4649       | --     |
| ENSG00000264657 | 5.13E-15 | -2.63127 | 1 | 1 hsa-mir-3171  | --     |
| ENSG00000264658 | 5.13E-15 | -2.63127 | 1 | 1 MIR4798       | --     |
| ENSG00000264659 | 5.13E-15 | -2.63127 | 1 | 1 CTD-2006K23.2 | --     |
| ENSG00000264660 | 5.13E-15 | -2.63127 | 1 | 1 RP11-381P6.1  | --     |
| ENSG00000264661 | 5.13E-15 | -2.63127 | 1 | 1 MIR3200       | --     |

|                 |          |          |   |                 |        |
|-----------------|----------|----------|---|-----------------|--------|
| ENSG00000264662 | 5.13E-15 | -2.63127 | 1 | 1 RP11-283C24.2 | _      |
| ENSG00000264663 | 5.13E-15 | -2.63127 | 1 | 1 KRT8P34       | K07605 |
| ENSG00000264667 | 5.13E-15 | -2.63127 | 1 | 1 AL137224.1    | _      |
| ENSG00000264669 | 5.13E-15 | -2.63127 | 1 | 1 AL136090.1    | _      |
| ENSG00000264672 | 5.13E-15 | -2.63127 | 1 | 1 RP11-112H10.4 | _      |
| ENSG00000264673 | 5.13E-15 | -2.63127 | 1 | 1 RP11-92B11.3  | _      |
| ENSG00000264674 | 5.13E-15 | -2.63127 | 1 | 1 AP000911.1    | _      |
| ENSG00000264675 | 5.13E-15 | -2.63127 | 1 | 1 MIR4285       | _      |
| ENSG00000264676 | 5.13E-15 | -2.63127 | 1 | 1 RN7SL204P     | _      |
| ENSG00000264677 | 5.13E-15 | -2.63127 | 1 | 1 AL355490.2    | _      |
| ENSG00000264678 | 5.13E-15 | -2.63127 | 1 | 1 MIR3140       | _      |
| ENSG00000264679 | 5.13E-15 | -2.63127 | 1 | 1 AC092104.2    | _      |
| ENSG00000264680 | 5.13E-15 | -2.63127 | 1 | 1 hsa-mir-3669  | _      |
| ENSG00000264681 | 5.13E-15 | -2.63127 | 1 | 1 AL445665.2    | _      |
| ENSG00000264684 | 5.13E-15 | -2.63127 | 1 | 1 MIR4773-2     | _      |
| ENSG00000264685 | 5.13E-15 | -2.63127 | 1 | 1 PRPF19P1      | K10599 |
| ENSG00000264686 | 5.13E-15 | -2.63127 | 1 | 1 AC104458.1    | _      |
| ENSG00000264687 | 5.13E-15 | -2.63127 | 1 | 1 AL050335.1    | _      |
| ENSG00000264689 | 5.13E-15 | -2.63127 | 1 | 1 RP11-19P22.2  | K08495 |
| ENSG00000264690 | 5.13E-15 | -2.63127 | 1 | 1 RN7SL534P     | _      |
| ENSG00000264691 | 5.13E-15 | -2.63127 | 1 | 1 AP001427.1    | _      |
| ENSG00000264693 | 5.13E-15 | -2.63127 | 1 | 1 RP11-63N3.1   | _      |
| ENSG00000264694 | 5.13E-15 | -2.63127 | 1 | 1 AC092122.1    | _      |
| ENSG00000264695 | 5.13E-15 | -2.63127 | 1 | 1 RP11-178F10.2 | _      |
| ENSG00000264696 | 5.13E-15 | -2.63127 | 1 | 1 AC108078.1    | _      |
| ENSG00000264697 | 5.13E-15 | -2.63127 | 1 | 1 RP11-585K6.2  | K14739 |
| ENSG00000264698 | 5.13E-15 | -2.63127 | 1 | 1 MIR4255       | _      |
| ENSG00000264699 | 5.13E-15 | -2.63127 | 1 | 1 RP11-421N8.2  | _      |
| ENSG00000264700 | 5.13E-15 | -2.63127 | 1 | 1 RN7SL588P     | _      |
| ENSG00000264701 | 5.13E-15 | -2.63127 | 1 | 1 RP11-6N17.10  | _      |
| ENSG00000264702 | 5.13E-15 | -2.63127 | 1 | 1 AC231656.1    | _      |
| ENSG00000264703 | 5.13E-15 | -2.63127 | 1 | 1 MIR4752       | _      |
| ENSG00000264705 | 5.13E-15 | -2.63127 | 1 | 1 RP11-674P19.2 | _      |
| ENSG00000264706 | 5.13E-15 | -2.63127 | 1 | 1 RN7SL217P     | _      |
| ENSG00000264707 | 5.13E-15 | -2.63127 | 1 | 1 RP11-760N9.1  | _      |
| ENSG00000264710 | 5.13E-15 | -2.63127 | 1 | 1 RN7SL453P     | _      |
| ENSG00000264711 | 5.13E-15 | -2.63127 | 1 | 1 AC007919.1    | _      |
| ENSG00000264712 | 5.13E-15 | -2.63127 | 1 | 1 MIR4504       | _      |
| ENSG00000264713 | 5.13E-15 | -2.63127 | 1 | 1 AC106878.1    | _      |
| ENSG00000264715 | 5.13E-15 | -2.63127 | 1 | 1 AC104996.1    | _      |
| ENSG00000264716 | 5.13E-15 | -2.63127 | 1 | 1 AC106827.2    | _      |
| ENSG00000264718 | 5.13E-15 | -2.63127 | 1 | 1 AC007050.1    | _      |
| ENSG00000264720 | 5.13E-15 | -2.63127 | 1 | 1 MIR3117       | _      |
| ENSG00000264721 | 5.13E-15 | -2.63127 | 1 | 1 AC104592.1    | _      |
| ENSG00000264722 | 5.13E-15 | -2.63127 | 1 | 1 MIR3670-2     | _      |
| ENSG00000264724 | 5.13E-15 | -2.63127 | 1 | 1 AC099332.1    | _      |
| ENSG00000264725 | 5.13E-15 | -2.63127 | 1 | 1 MIR3129       | _      |
| ENSG00000264726 | 5.13E-15 | -2.63127 | 1 | 1 AL162711.1    | _      |
| ENSG00000264727 | 5.13E-15 | -2.63127 | 1 | 1 RP11-680C21.1 | _      |
| ENSG00000264729 | 5.13E-15 | -2.63127 | 1 | 1 RP11-219A15.2 | _      |
| ENSG00000264730 | 5.13E-15 | -2.63127 | 1 | 1 AC017028.5    | _      |
| ENSG00000264731 | 5.13E-15 | -2.63127 | 1 | 1 RN7SL175P     | _      |
| ENSG00000264732 | 5.13E-15 | -2.63127 | 1 | 1 MIR4638       | _      |
| ENSG00000264733 | 5.13E-15 | -2.63127 | 1 | 1 MIR4718       | _      |
| ENSG00000264734 | 5.13E-15 | -2.63127 | 1 | 1 RP11-260A9.6  | _      |
| ENSG00000264736 | 5.13E-15 | -2.63127 | 1 | 1 BDP1P         | K15198 |
| ENSG00000264737 | 5.13E-15 | -2.63127 | 1 | 1 MIR4511       | _      |
| ENSG00000264739 | 5.13E-15 | -2.63127 | 1 | 1 RP11-138I1.2  | _      |



|                 |          |          |   |                   |        |
|-----------------|----------|----------|---|-------------------|--------|
| ENSG00000264740 | 5.13E-15 | -2.63127 | 1 | 1 AC008064.1      | --     |
| ENSG00000264741 | 5.13E-15 | -2.63127 | 1 | 1 MIR4505         | --     |
| ENSG00000264742 | 5.13E-15 | -2.63127 | 1 | 1 AL021920.1      | --     |
| ENSG00000264744 | 5.13E-15 | -2.63127 | 1 | 1 MIR3689C        | --     |
| ENSG00000264746 | 5.13E-15 | -2.63127 | 1 | 1 AC004552.1      | --     |
| ENSG00000264747 | 5.13E-15 | -2.63127 | 1 | 1 MIR3924         | --     |
| ENSG00000264748 | 5.13E-15 | -2.63127 | 1 | 1 AC025470.1      | --     |
| ENSG00000264749 | 5.13E-15 | -2.63127 | 1 | 1 AC011313.1      | --     |
| ENSG00000264750 | 5.13E-15 | -2.63127 | 1 | 1 RP11-277J6.2    | --     |
| ENSG00000264752 | 5.13E-15 | -2.63127 | 1 | 1 RN7SL90P        | --     |
| ENSG00000264753 | 5.13E-15 | -2.63127 | 1 | 1 AL390036.1      | --     |
| ENSG00000264754 | 5.13E-15 | -2.63127 | 1 | 1 CTD-2653B5.1    | --     |
| ENSG00000264755 | 5.13E-15 | -2.63127 | 1 | 1 MIR3131         | --     |
| ENSG00000264757 | 5.13E-15 | -2.63127 | 1 | 1 MIR3198-1       | --     |
| ENSG00000264758 | 5.13E-15 | -2.63127 | 1 | 1 RN7SL161P       | --     |
| ENSG00000264759 | 5.13E-15 | -2.63127 | 1 | 1 AC005000.2      | --     |
| ENSG00000264760 | 5.13E-15 | -2.63127 | 1 | 1 MIR3141         | --     |
| ENSG00000264761 | 5.13E-15 | -2.63127 | 1 | 1 RN7SL43P        | --     |
| ENSG00000264763 | 5.13E-15 | -2.63127 | 1 | 1 MIR4295         | --     |
| ENSG00000264764 | 5.13E-15 | -2.63127 | 1 | 1 MIR4772         | --     |
| ENSG00000264765 | 5.13E-15 | -2.63127 | 1 | 1 RP11-92B11.4    | --     |
| ENSG00000264766 | 5.13E-15 | -2.63127 | 1 | 1 AC079756.1      | --     |
| ENSG00000264767 | 5.13E-15 | -2.63127 | 1 | 1 RN7SL237P       | --     |
| ENSG00000264768 | 5.13E-15 | -2.63127 | 1 | 1 AL450304.1      | --     |
| ENSG00000264773 | 5.13E-15 | -2.63127 | 1 | 1 MIR4420         | --     |
| ENSG00000264774 | 5.13E-15 | -2.63127 | 1 | 1 AC099669.1      | --     |
| ENSG00000264775 | 5.13E-15 | -2.63127 | 1 | 1 PPIAP14         | K03767 |
| ENSG00000264779 | 5.13E-15 | -2.63127 | 1 | 1 AC107871.1      | --     |
| ENSG00000264780 | 5.13E-15 | -2.63127 | 1 | 1 MIR4683         | --     |
| ENSG00000264781 | 5.13E-15 | -2.63127 | 1 | 1 hsa-mir-4537    | --     |
| ENSG00000264783 | 5.13E-15 | -2.63127 | 1 | 1 BX664739.1      | --     |
| ENSG00000264785 | 5.13E-15 | -2.63127 | 1 | 1 RP11-311F12.2   | --     |
| ENSG00000264788 | 5.13E-15 | -2.63127 | 1 | 1 MIR3148         | --     |
| ENSG00000264790 | 5.13E-15 | -2.63127 | 1 | 1 RP11-26N15.2    | --     |
| ENSG00000264791 | 5.13E-15 | -2.63127 | 1 | 1 CTC-304I17.2    | --     |
| ENSG00000264793 | 5.13E-15 | -2.63127 | 1 | 1 MIR4771-1       | --     |
| ENSG00000264794 | 5.13E-15 | -2.63127 | 1 | 1 AC024996.1      | --     |
| ENSG00000264796 | 5.13E-15 | -2.63127 | 1 | 1 MIR5009         | --     |
| ENSG00000264797 | 5.13E-15 | -2.63127 | 1 | 1 AL356756.1      | --     |
| ENSG00000264798 | 5.13E-15 | -2.63127 | 1 | 1 AC105381.1      | --     |
| ENSG00000264799 | 5.13E-15 | -2.63127 | 1 | 1 AC009892.1      | --     |
| ENSG00000264800 | 5.13E-15 | -2.63127 | 1 | 1 MIR4294         | --     |
| ENSG00000264802 | 5.13E-15 | -2.63127 | 1 | 1 MIR5191         | --     |
| ENSG00000264803 | 5.13E-15 | -2.63127 | 1 | 1 MIR378C         | --     |
| ENSG00000264804 | 5.13E-15 | -2.63127 | 1 | 1 AC098848.1      | --     |
| ENSG00000264809 | 5.13E-15 | -2.63127 | 1 | 1 AL513344.1      | --     |
| ENSG00000264810 | 5.13E-15 | -2.63127 | 1 | 1 MIR4441         | --     |
| ENSG00000264811 | 5.13E-15 | -2.63127 | 1 | 1 RP11-1109M24.14 | --     |
| ENSG00000264813 | 5.13E-15 | -2.63127 | 1 | 1 ACE             | K01283 |
| ENSG00000264814 | 5.13E-15 | -2.63127 | 1 | 1 MIR1273C        | --     |
| ENSG00000264815 | 5.13E-15 | -2.63127 | 1 | 1 AF130343.1      | --     |
| ENSG00000264817 | 5.13E-15 | -2.63127 | 1 | 1 MIR4741         | --     |
| ENSG00000264818 | 5.13E-15 | -2.63127 | 1 | 1 MIR3714         | --     |
| ENSG00000264819 | 5.13E-15 | -2.63127 | 1 | 1 BX649553.4      | --     |
| ENSG00000264823 | 5.13E-15 | -2.63127 | 1 | 1 MIR3154         | --     |
| ENSG00000264824 | 5.13E-15 | -2.63127 | 1 | 1 hsa-mir-5571    | --     |
| ENSG00000264825 | 5.13E-15 | -2.63127 | 1 | 1 RP11-627G18.4   | --     |
| ENSG00000264831 | 5.13E-15 | -2.63127 | 1 | 1 MIR4260         | --     |

|                 |          |          |   |                 |        |
|-----------------|----------|----------|---|-----------------|--------|
| ENSG00000264833 | 5.13E-15 | -2.63127 | 1 | 1 RN7SL468P     | --     |
| ENSG00000264834 | 5.13E-15 | -2.63127 | 1 | 1 MIR1273F      | --     |
| ENSG00000264835 | 5.13E-15 | -2.63127 | 1 | 1 RN7SL345P     | --     |
| ENSG00000264837 | 5.13E-15 | -2.63127 | 1 | 1 VN1R71P       | K04614 |
| ENSG00000264838 | 5.13E-15 | -2.63127 | 1 | 1 AP003305.1    | --     |
| ENSG00000264839 | 5.13E-15 | -2.63127 | 1 | 1 AC113407.1    | --     |
| ENSG00000264840 | 5.13E-15 | -2.63127 | 1 | 1 RN7SL404P     | --     |
| ENSG00000264841 | 5.13E-15 | -2.63127 | 1 | 1 AC134729.1    | --     |
| ENSG00000264844 | 5.13E-15 | -2.63127 | 1 | 1 AC018767.1    | --     |
| ENSG00000264845 | 5.13E-15 | -2.63127 | 1 | 1 RP11-46514.3  | --     |
| ENSG00000264849 | 5.13E-15 | -2.63127 | 1 | 1 AC019198.1    | --     |
| ENSG00000264850 | 5.13E-15 | -2.63127 | 1 | 1 MIR4310       | --     |
| ENSG00000264855 | 5.13E-15 | -2.63127 | 1 | 1 AL590763.1    | --     |
| ENSG00000264856 | 5.13E-15 | -2.63127 | 1 | 1 RN7SL206P     | --     |
| ENSG00000264858 | 5.13E-15 | -2.63127 | 1 | 1 AL358134.2    | --     |
| ENSG00000264861 | 5.13E-15 | -2.63127 | 1 | 1 AC108683.1    | --     |
| ENSG00000264862 | 5.13E-15 | -2.63127 | 1 | 1 RN7SL45P      | --     |
| ENSG00000264869 | 5.13E-15 | -2.63127 | 1 | 1 RP11-526H11.1 | --     |
| ENSG00000264871 | 5.13E-15 | -2.63127 | 1 | 1 AC104331.1    | --     |
| ENSG00000264874 | 5.13E-15 | -2.63127 | 1 | 1 AC087499.8    | K06630 |
| ENSG00000264875 | 5.13E-15 | -2.63127 | 1 | 1 MIR3610       | --     |
| ENSG00000264876 | 5.13E-15 | -2.63127 | 1 | 1 RP11-138E9.2  | --     |
| ENSG00000264877 | 5.13E-15 | -2.63127 | 1 | 1 AL603650.2    | --     |
| ENSG00000264879 | 5.13E-15 | -2.63127 | 1 | 1 RN7SL690P     | --     |
| ENSG00000264880 | 5.13E-15 | -2.63127 | 1 | 1 RP11-805F19.1 | --     |
| ENSG00000264881 | 5.13E-15 | -2.63127 | 1 | 1 MIR1273D      | --     |
| ENSG00000264882 | 5.13E-15 | -2.63127 | 1 | 1 MIR376A1      | --     |
| ENSG00000264884 | 5.13E-15 | -2.63127 | 1 | 1 AL590684.1    | --     |
| ENSG00000264888 | 5.13E-15 | -2.63127 | 1 | 1 AL121753.1    | --     |
| ENSG00000264890 | 5.13E-15 | -2.63127 | 1 | 1 AC011379.1    | --     |
| ENSG00000264891 | 5.13E-15 | -2.63127 | 1 | 1 AL359091.1    | --     |
| ENSG00000264892 | 5.13E-15 | -2.63127 | 1 | 1 RP11-219A15.3 | K13241 |
| ENSG00000264894 | 5.13E-15 | -2.63127 | 1 | 1 AL590282.1    | --     |
| ENSG00000264896 | 5.13E-15 | -2.63127 | 1 | 1 AL451006.1    | --     |
| ENSG00000264897 | 5.13E-15 | -2.63127 | 1 | 1 MIR3921       | --     |
| ENSG00000264898 | 5.13E-15 | -2.63127 | 1 | 1 AL353626.2    | --     |
| ENSG00000264899 | 5.13E-15 | -2.63127 | 1 | 1 AC027319.2    | --     |
| ENSG00000264900 | 5.13E-15 | -2.63127 | 1 | 1 MIR4775       | --     |
| ENSG00000264901 | 5.13E-15 | -2.63127 | 1 | 1 MIR3616       | --     |
| ENSG00000264902 | 5.13E-15 | -2.63127 | 1 | 1 MIR5701-2     | --     |
| ENSG00000264903 | 5.13E-15 | -2.63127 | 1 | 1 AC122720.1    | --     |
| ENSG00000264904 | 5.13E-15 | -2.63127 | 1 | 1 AL139300.1    | --     |
| ENSG00000264906 | 5.13E-15 | -2.63127 | 1 | 1 MIR4494       | --     |
| ENSG00000264907 | 5.13E-15 | -2.63127 | 1 | 1 SLMO2P3       | --     |
| ENSG00000264908 | 5.13E-15 | -2.63127 | 1 | 1 AC000403.1    | --     |
| ENSG00000264910 | 5.13E-15 | -2.63127 | 1 | 1 RN7SL525P     | --     |
| ENSG00000264911 | 5.13E-15 | -2.63127 | 1 | 1 RP11-107K17.2 | K09228 |
| ENSG00000264912 | 5.13E-15 | -2.63127 | 1 | 1 RN7SL640P     | --     |
| ENSG00000264913 | 5.13E-15 | -2.63127 | 1 | 1 AL590233.1    | --     |
| ENSG00000264914 | 5.13E-15 | -2.63127 | 1 | 1 RP11-343K8.3  | --     |
| ENSG00000264916 | 5.13E-15 | -2.63127 | 1 | 1 RN7SL230P     | --     |
| ENSG00000264921 | 5.13E-15 | -2.63127 | 1 | 1 AC106771.1    | --     |
| ENSG00000264922 | 5.13E-15 | -2.63127 | 1 | 1 MIR4540       | --     |
| ENSG00000264923 | 5.13E-15 | -2.63127 | 1 | 1 RN7SL511P     | --     |
| ENSG00000264924 | 5.13E-15 | -2.63127 | 1 | 1 RP11-799B12.2 | --     |
| ENSG00000264925 | 5.13E-15 | -2.63127 | 1 | 1 Z98949.1      | --     |
| ENSG00000264926 | 5.13E-15 | -2.63127 | 1 | 1 MIR378F       | --     |
| ENSG00000264927 | 5.13E-15 | -2.63127 | 1 | 1 AC093816.1    | --     |

|                 |          |          |   |                  |        |
|-----------------|----------|----------|---|------------------|--------|
| ENSG00000264928 | 5.13E-15 | -2.63127 | 1 | 1 AC118463.1     | --     |
| ENSG00000264929 | 5.13E-15 | -2.63127 | 1 | 1 RN7SL348P      | --     |
| ENSG00000264930 | 5.13E-15 | -2.63127 | 1 | 1 RP11-846F4.10  | --     |
| ENSG00000264932 | 5.13E-15 | -2.63127 | 1 | 1 Y_RNA          | --     |
| ENSG00000264933 | 5.13E-15 | -2.63127 | 1 | 1 RN7SL190P      | --     |
| ENSG00000264934 | 5.13E-15 | -2.63127 | 1 | 1 MIR4265        | --     |
| ENSG00000264935 | 5.13E-15 | -2.63127 | 1 | 1 AC009035.1     | --     |
| ENSG00000264939 | 5.13E-15 | -2.63127 | 1 | 1 RP11-1109M24.9 | --     |
| ENSG00000264940 | 5.13E-15 | -2.63127 | 1 | 1 SNORD3C        | --     |
| ENSG00000264941 | 5.13E-15 | -2.63127 | 1 | 1 MIR4474        | --     |
| ENSG00000264944 | 5.13E-15 | -2.63127 | 1 | 1 MIR3620        | --     |
| ENSG00000264946 | 5.13E-15 | -2.63127 | 1 | 1 RN7SL197P      | --     |
| ENSG00000264948 | 5.13E-15 | -2.63127 | 1 | 1 RN7SL639P      | --     |
| ENSG00000264949 | 5.13E-15 | -2.63127 | 1 | 1 RN7SL412P      | --     |
| ENSG00000264950 | 5.13E-15 | -2.63127 | 1 | 1 AC113208.1     | --     |
| ENSG00000264953 | 5.13E-15 | -2.63127 | 1 | 1 AC093602.1     | --     |
| ENSG00000264954 | 5.13E-15 | -2.63127 | 1 | 1 RP11-214C8.2   | --     |
| ENSG00000264956 | 5.13E-15 | -2.63127 | 1 | 1 RP11-1109M24.5 | --     |
| ENSG00000264957 | 5.13E-15 | -2.63127 | 1 | 1 AL109805.1     | --     |
| ENSG00000264958 | 5.13E-15 | -2.63127 | 1 | 1 ALOX12P1       | K00458 |
| ENSG00000264963 | 5.13E-15 | -2.63127 | 1 | 1 RN7SL440P      | --     |
| ENSG00000264965 | 5.13E-15 | -2.63127 | 1 | 1 AC144573.1     | --     |
| ENSG00000264966 | 5.13E-15 | -2.63127 | 1 | 1 MIR5094        | --     |
| ENSG00000264967 | 5.13E-15 | -2.63127 | 1 | 1 RN7SL722P      | --     |
| ENSG00000264968 | 5.13E-15 | -2.63127 | 1 | 1 RP11-387H17.4  | --     |
| ENSG00000264969 | 5.13E-15 | -2.63127 | 1 | 1 AC009941.1     | --     |
| ENSG00000264970 | 5.13E-15 | -2.63127 | 1 | 1 RP11-846F4.11  | K06632 |
| ENSG00000264971 | 5.13E-15 | -2.63127 | 1 | 1 RP11-110H1.1   | --     |
| ENSG00000264972 | 5.13E-15 | -2.63127 | 1 | 1 AL445675.1     | --     |
| ENSG00000264973 | 5.13E-15 | -2.63127 | 1 | 1 RN7SL701P      | --     |
| ENSG00000264974 | 5.13E-15 | -2.63127 | 1 | 1 MIR4789        | --     |
| ENSG00000264975 | 5.13E-15 | -2.63127 | 1 | 1 MIR4431        | --     |
| ENSG00000264976 | 5.13E-15 | -2.63127 | 1 | 1 AC009478.2     | --     |
| ENSG00000264977 | 5.13E-15 | -2.63127 | 1 | 1 RN7SL248P      | --     |
| ENSG00000264978 | 5.13E-15 | -2.63127 | 1 | 1 RN7SL630P      | --     |
| ENSG00000264979 | 5.13E-15 | -2.63127 | 1 | 1 MIR4436B2      | --     |
| ENSG00000264981 | 5.13E-15 | -2.63127 | 1 | 1 RP11-434D2.10  | K13241 |
| ENSG00000264982 | 5.13E-15 | -2.63127 | 1 | 1 RP11-344B2.2   | --     |
| ENSG00000264984 | 5.13E-15 | -2.63127 | 1 | 1 MIR5691        | --     |
| ENSG00000264985 | 5.13E-15 | -2.63127 | 1 | 1 RP11-449L23.2  | --     |
| ENSG00000264986 | 5.13E-15 | -2.63127 | 1 | 1 MIR5092        | --     |
| ENSG00000264987 | 5.13E-15 | -2.63127 | 1 | 1 AC110280.1     | --     |
| ENSG00000264989 | 5.13E-15 | -2.63127 | 1 | 1 AL136302.1     | --     |
| ENSG00000264990 | 5.13E-15 | -2.63127 | 1 | 1 RP11-215E13.2  | --     |
| ENSG00000264995 | 5.13E-15 | -2.63127 | 1 | 1 RN7SL540P      | --     |
| ENSG00000264997 | 5.13E-15 | -2.63127 | 1 | 1 SNORD39        | --     |
| ENSG00000264999 | 5.13E-15 | -2.63127 | 1 | 1 MIR5089        | --     |
| ENSG00000265000 | 5.13E-15 | -2.63127 | 1 | 1 RP11-453A12.1  | --     |
| ENSG00000265001 | 5.13E-15 | -2.63127 | 1 | 1 AC092846.2     | --     |
| ENSG00000265002 | 5.13E-15 | -2.63127 | 1 | 1 AC026495.1     | --     |
| ENSG00000265003 | 5.13E-15 | -2.63127 | 1 | 1 MIR4780        | --     |
| ENSG00000265005 | 5.13E-15 | -2.63127 | 1 | 1 MIR548W        | --     |
| ENSG00000265007 | 5.13E-15 | -2.63127 | 1 | 1 MIR4327        | --     |
| ENSG00000265009 | 5.13E-15 | -2.63127 | 1 | 1 AC078864.1     | --     |
| ENSG00000265011 | 5.13E-15 | -2.63127 | 1 | 1 RN7SL315P      | --     |
| ENSG00000265012 | 5.13E-15 | -2.63127 | 1 | 1 AC024896.1     | --     |
| ENSG00000265014 | 5.13E-15 | -2.63127 | 1 | 1 MIR3160-1      | --     |
| ENSG00000265015 | 5.13E-15 | -2.63127 | 1 | 1 RP11-454P7.3   | K14958 |

|                 |          |          |   |                 |        |
|-----------------|----------|----------|---|-----------------|--------|
| ENSG00000265017 | 5.13E-15 | -2.63127 | 1 | 1 AC092634.2    | -      |
| ENSG00000265019 | 5.13E-15 | -2.63127 | 1 | 1 NCOR1P2       | K04650 |
| ENSG00000265020 | 5.13E-15 | -2.63127 | 1 | 1 MIR4651       | -      |
| ENSG00000265023 | 5.13E-15 | -2.63127 | 1 | 1 AC011450.1    | -      |
| ENSG00000265024 | 5.13E-15 | -2.63127 | 1 | 1 AC073089.1    | -      |
| ENSG00000265028 | 5.13E-15 | -2.63127 | 1 | 1 MIR4792       | -      |
| ENSG00000265029 | 5.13E-15 | -2.63127 | 1 | 1 AC023158.1    | -      |
| ENSG00000265032 | 5.13E-15 | -2.63127 | 1 | 1 AL132709.2    | -      |
| ENSG00000265033 | 5.13E-15 | -2.63127 | 1 | 1 RN7SL262P     | -      |
| ENSG00000265035 | 5.13E-15 | -2.63127 | 1 | 1 AC079772.1    | -      |
| ENSG00000265037 | 5.13E-15 | -2.63127 | 1 | 1 MIR4707       | -      |
| ENSG00000265038 | 5.13E-15 | -2.63127 | 1 | 1 PMM2P1        | K17497 |
| ENSG00000265039 | 5.13E-15 | -2.63127 | 1 | 1 AC107016.2    | -      |
| ENSG00000265040 | 5.13E-15 | -2.63127 | 1 | 1 RN7SL556P     | -      |
| ENSG00000265041 | 5.13E-15 | -2.63127 | 1 | 1 RP11-19P22.7  | K11837 |
| ENSG00000265042 | 5.13E-15 | -2.63127 | 1 | 1 AL137800.1    | -      |
| ENSG00000265043 | 5.13E-15 | -2.63127 | 1 | 1 RP11-728E14.3 | -      |
| ENSG00000265045 | 5.13E-15 | -2.63127 | 1 | 1 RN7SL486P     | -      |
| ENSG00000265046 | 5.13E-15 | -2.63127 | 1 | 1 CTC-542B22.1  | -      |
| ENSG00000265047 | 5.13E-15 | -2.63127 | 1 | 1 AC026992.1    | -      |
| ENSG00000265049 | 5.13E-15 | -2.63127 | 1 | 1 AC009480.1    | -      |
| ENSG00000265050 | 5.13E-15 | -2.63127 | 1 | 1 AC092022.1    | -      |
| ENSG00000265052 | 5.13E-15 | -2.63127 | 1 | 1 RN7SL622P     | -      |
| ENSG00000265053 | 5.13E-15 | -2.63127 | 1 | 1 RN7SL321P     | -      |
| ENSG00000265054 | 5.13E-15 | -2.63127 | 1 | 1 AC090051.1    | -      |
| ENSG00000265055 | 5.13E-15 | -2.63127 | 1 | 1 AC145343.2    | -      |
| ENSG00000265056 | 5.13E-15 | -2.63127 | 1 | 1 MIR548S       | -      |
| ENSG00000265057 | 5.13E-15 | -2.63127 | 1 | 1 MIR4765       | -      |
| ENSG00000265058 | 5.13E-15 | -2.63127 | 1 | 1 RN7SL245P     | -      |
| ENSG00000265060 | 5.13E-15 | -2.63127 | 1 | 1 PPY2          | K05234 |
| ENSG00000265061 | 5.13E-15 | -2.63127 | 1 | 1 MIR4419B      | -      |
| ENSG00000265062 | 5.13E-15 | -2.63127 | 1 | 1 AL133228.1    | -      |
| ENSG00000265063 | 5.13E-15 | -2.63127 | 1 | 1 AC009831.1    | -      |
| ENSG00000265064 | 5.13E-15 | -2.63127 | 1 | 1 MIR4692       | -      |
| ENSG00000265067 | 5.13E-15 | -2.63127 | 1 | 1 RN7SL707P     | -      |
| ENSG00000265070 | 5.13E-15 | -2.63127 | 1 | 1 AC006115.1    | -      |
| ENSG00000265072 | 5.13E-15 | -2.63127 | 1 | 1 MIR3652       | -      |
| ENSG00000265073 | 5.13E-15 | -2.63127 | 1 | 1 AC010761.6    | -      |
| ENSG00000265075 | 5.13E-15 | -2.63127 | 1 | 1 MIR3622B      | -      |
| ENSG00000265076 | 5.13E-15 | -2.63127 | 1 | 1 AC016970.1    | -      |
| ENSG00000265077 | 5.13E-15 | -2.63127 | 1 | 1 RN7SL54P      | -      |
| ENSG00000265078 | 5.13E-15 | -2.63127 | 1 | 1 RN7SL664P     | -      |
| ENSG00000265080 | 5.13E-15 | -2.63127 | 1 | 1 MIR4800       | -      |
| ENSG00000265081 | 5.13E-15 | -2.63127 | 1 | 1 RN7SL102P     | -      |
| ENSG00000265082 | 5.13E-15 | -2.63127 | 1 | 1 AL356213.1    | -      |
| ENSG00000265084 | 5.13E-15 | -2.63127 | 1 | 1 AC092364.2    | -      |
| ENSG00000265085 | 5.13E-15 | -2.63127 | 1 | 1 AC110810.1    | -      |
| ENSG00000265086 | 5.13E-15 | -2.63127 | 1 | 1 AC006534.2    | -      |
| ENSG00000265087 | 5.13E-15 | -2.63127 | 1 | 1 MIR4761       | -      |
| ENSG00000265090 | 5.13E-15 | -2.63127 | 1 | 1 AC104637.1    | -      |
| ENSG00000265091 | 5.13E-15 | -2.63127 | 1 | 1 RP11-835E18.5 | -      |
| ENSG00000265092 | 5.13E-15 | -2.63127 | 1 | 1 MIR4484       | -      |
| ENSG00000265093 | 5.13E-15 | -2.63127 | 1 | 1 RN7SL246P     | -      |
| ENSG00000265094 | 5.13E-15 | -2.63127 | 1 | 1 RP11-178F10.1 | -      |
| ENSG00000265097 | 5.13E-15 | -2.63127 | 1 | 1 RBM22P1       | -      |
| ENSG00000265098 | 5.13E-15 | -2.63127 | 1 | 1 MIR4510       | -      |
| ENSG00000265099 | 5.13E-15 | -2.63127 | 1 | 1 RP11-344E13.1 | -      |
| ENSG00000265100 | 5.13E-15 | -2.63127 | 1 | 1 RP11-147L13.2 | -      |

|                 |          |          |   |                 |        |
|-----------------|----------|----------|---|-----------------|--------|
| ENSG00000265101 | 5.13E-15 | -2.63127 | 1 | 1 CTD-2382H12.1 | --     |
| ENSG00000265102 | 5.13E-15 | -2.63127 | 1 | 1 MIR3942       | --     |
| ENSG00000265104 | 5.13E-15 | -2.63127 | 1 | 1 AC011416.1    | --     |
| ENSG00000265108 | 5.13E-15 | -2.63127 | 1 | 1 AL357932.1    | --     |
| ENSG00000265109 | 5.13E-15 | -2.63127 | 1 | 1 AC055811.1    | --     |
| ENSG00000265110 | 5.13E-15 | -2.63127 | 1 | 1 MIR4731       | --     |
| ENSG00000265113 | 5.13E-15 | -2.63127 | 1 | 1 RP11-7005.2   | --     |
| ENSG00000265114 | 5.13E-15 | -2.63127 | 1 | 1 RP11-285M22.1 | --     |
| ENSG00000265115 | 5.13E-15 | -2.63127 | 1 | 1 RP11-31I22.2  | --     |
| ENSG00000265118 | 5.13E-15 | -2.63127 | 1 | 1 CTD-2370N5.3  | K16854 |
| ENSG00000265119 | 5.13E-15 | -2.63127 | 1 | 1 RN7SL676P     | --     |
| ENSG00000265121 | 5.13E-15 | -2.63127 | 1 | 1 RP11-285E9.5  | --     |
| ENSG00000265122 | 5.13E-15 | -2.63127 | 1 | 1 AC010247.1    | --     |
| ENSG00000265125 | 5.13E-15 | -2.63127 | 1 | 1 RP11-31I22.3  | --     |
| ENSG00000265127 | 5.13E-15 | -2.63127 | 1 | 1 AC009080.1    | --     |
| ENSG00000265129 | 5.13E-15 | -2.63127 | 1 | 1 AC064837.1    | --     |
| ENSG00000265130 | 5.13E-15 | -2.63127 | 1 | 1 CTB-58E17.2   | --     |
| ENSG00000265132 | 5.13E-15 | -2.63127 | 1 | 1 AC145141.2    | --     |
| ENSG00000265134 | 5.13E-15 | -2.63127 | 1 | 1 MIR3191       | --     |
| ENSG00000265135 | 5.13E-15 | -2.63127 | 1 | 1 MIR5687       | --     |
| ENSG00000265140 | 5.13E-15 | -2.63127 | 1 | 1 MIR4301       | --     |
| ENSG00000265141 | 5.13E-15 | -2.63127 | 1 | 1 RN7SL451P     | --     |
| ENSG00000265142 | 5.13E-15 | -2.63127 | 1 | 1 MIR1-2        | --     |
| ENSG00000265143 | 5.13E-15 | -2.63127 | 1 | 1 RN7SL490P     | --     |
| ENSG00000265144 | 5.13E-15 | -2.63127 | 1 | 1 MIR548AM      | --     |
| ENSG00000265145 | 5.13E-15 | -2.63127 | 1 | 1 SNORD53       | --     |
| ENSG00000265149 | 5.13E-15 | -2.63127 | 1 | 1 RN7SL669P     | --     |
| ENSG00000265151 | 5.13E-15 | -2.63127 | 1 | 1 AL158175.1    | --     |
| ENSG00000265152 | 5.13E-15 | -2.63127 | 1 | 1 AF222686.1    | --     |
| ENSG00000265154 | 5.13E-15 | -2.63127 | 1 | 1 MIR151B       | --     |
| ENSG00000265155 | 5.13E-15 | -2.63127 | 1 | 1 AC092104.3    | --     |
| ENSG00000265157 | 5.13E-15 | -2.63127 | 1 | 1 AF070718.1    | --     |
| ENSG00000265158 | 5.13E-15 | -2.63127 | 1 | 1 LRRC37A7P     | --     |
| ENSG00000265160 | 5.13E-15 | -2.63127 | 1 | 1 MIR5003       | --     |
| ENSG00000265161 | 5.13E-15 | -2.63127 | 1 | 1 AC011293.1    | --     |
| ENSG00000265163 | 5.13E-15 | -2.63127 | 1 | 1 CDRT8         | --     |
| ENSG00000265164 | 5.13E-15 | -2.63127 | 1 | 1 MIR2681       | --     |
| ENSG00000265165 | 5.13E-15 | -2.63127 | 1 | 1 MIR4307       | --     |
| ENSG00000265166 | 5.13E-15 | -2.63127 | 1 | 1 AF186996.1    | --     |
| ENSG00000265167 | 5.13E-15 | -2.63127 | 1 | 1 AC009081.1    | --     |
| ENSG00000265168 | 5.13E-15 | -2.63127 | 1 | 1 RP11-192H23.5 | --     |
| ENSG00000265169 | 5.13E-15 | -2.63127 | 1 | 1 AC034187.3    | --     |
| ENSG00000265170 | 5.13E-15 | -2.63127 | 1 | 1 RN7SL667P     | --     |
| ENSG00000265171 | 5.13E-15 | -2.63127 | 1 | 1 RN7SL699P     | --     |
| ENSG00000265172 | 5.13E-15 | -2.63127 | 1 | 1 MIR4262       | --     |
| ENSG00000265174 | 5.13E-15 | -2.63127 | 1 | 1 CTD-2124B20.3 | --     |
| ENSG00000265175 | 5.13E-15 | -2.63127 | 1 | 1 AC092685.1    | --     |
| ENSG00000265176 | 5.13E-15 | -2.63127 | 1 | 1 MIR3202-1     | --     |
| ENSG00000265178 | 5.13E-15 | -2.63127 | 1 | 1 MIR4728       | --     |
| ENSG00000265179 | 5.13E-15 | -2.63127 | 1 | 1 RP11-672L10.2 | --     |
| ENSG00000265180 | 5.13E-15 | -2.63127 | 1 | 1 MIR4790       | --     |
| ENSG00000265181 | 5.13E-15 | -2.63127 | 1 | 1 MIR4674       | --     |
| ENSG00000265182 | 5.13E-15 | -2.63127 | 1 | 1 SRP72P1       | K03108 |
| ENSG00000265186 | 5.13E-15 | -2.63127 | 1 | 1 AC068706.2    | --     |
| ENSG00000265187 | 5.13E-15 | -2.63127 | 1 | 1 AL109612.1    | --     |
| ENSG00000265188 | 5.13E-15 | -2.63127 | 1 | 1 RP11-835E18.4 | --     |
| ENSG00000265189 | 5.13E-15 | -2.63127 | 1 | 1 AC006080.1    | --     |
| ENSG00000265191 | 5.13E-15 | -2.63127 | 1 | 1 RN7SL347P     | --     |

|                 |          |          |   |                 |        |
|-----------------|----------|----------|---|-----------------|--------|
| ENSG00000265192 | 5.13E-15 | -2.63127 | 1 | 1 RN7SL85P      | --     |
| ENSG00000265193 | 5.13E-15 | -2.63127 | 1 | 1 MIR3923       | --     |
| ENSG00000265197 | 5.13E-15 | -2.63127 | 1 | 1 AC053516.1    | --     |
| ENSG00000265199 | 5.13E-15 | -2.63127 | 1 | 1 AL359218.1    | --     |
| ENSG00000265200 | 5.13E-15 | -2.63127 | 1 | 1 AC090324.1    | --     |
| ENSG00000265201 | 5.13E-15 | -2.63127 | 1 | 1 MIR4677       | --     |
| ENSG00000265204 | 5.13E-15 | -2.63127 | 1 | 1 RP11-403A21.3 | --     |
| ENSG00000265205 | 5.13E-15 | -2.63127 | 1 | 1 AC010761.13   | --     |
| ENSG00000265206 | 5.13E-15 | -2.63127 | 1 | 1 MIR142        | --     |
| ENSG00000265208 | 5.13E-15 | -2.63127 | 1 | 1 AC015600.1    | --     |
| ENSG00000265209 | 5.13E-15 | -2.63127 | 1 | 1 AC010543.1    | --     |
| ENSG00000265210 | 5.13E-15 | -2.63127 | 1 | 1 MIR4486       | --     |
| ENSG00000265211 | 5.13E-15 | -2.63127 | 1 | 1 AL121865.1    | --     |
| ENSG00000265212 | 5.13E-15 | -2.63127 | 1 | 1 AC007009.2    | --     |
| ENSG00000265213 | 5.13E-15 | -2.63127 | 1 | 1 MIR3684       | --     |
| ENSG00000265214 | 5.13E-15 | -2.63127 | 1 | 1 MIR4283-1     | --     |
| ENSG00000265215 | 5.13E-15 | -2.63127 | 1 | 1 MIR4269       | --     |
| ENSG00000265216 | 5.13E-15 | -2.63127 | 1 | 1 AL592310.1    | --     |
| ENSG00000265217 | 5.13E-15 | -2.63127 | 1 | 1 RP11-775G23.1 | --     |
| ENSG00000265219 | 5.13E-15 | -2.63127 | 1 | 1 AC011652.1    | --     |
| ENSG00000265222 | 5.13E-15 | -2.63127 | 1 | 1 RP11-466A19.8 | --     |
| ENSG00000265224 | 5.13E-15 | -2.63127 | 1 | 1 AC012353.1    | --     |
| ENSG00000265225 | 5.13E-15 | -2.63127 | 1 | 1 AL118525.1    | --     |
| ENSG00000265226 | 5.13E-15 | -2.63127 | 1 | 1 MIR548AI      | --     |
| ENSG00000265227 | 5.13E-15 | -2.63127 | 1 | 1 MIR4699       | --     |
| ENSG00000265229 | 5.13E-15 | -2.63127 | 1 | 1 RN7SL112P     | --     |
| ENSG00000265230 | 5.13E-15 | -2.63127 | 1 | 1 RN7SL407P     | --     |
| ENSG00000265233 | 5.13E-15 | -2.63127 | 1 | 1 AC144838.2    | K19331 |
| ENSG00000265235 | 5.13E-15 | -2.63127 | 1 | 1 AC083908.1    | --     |
| ENSG00000265236 | 5.13E-15 | -2.63127 | 1 | 1 SNORD84       | --     |
| ENSG00000265237 | 5.13E-15 | -2.63127 | 1 | 1 MIR3142       | --     |
| ENSG00000265238 | 5.13E-15 | -2.63127 | 1 | 1 MIR3614       | --     |
| ENSG00000265239 | 5.13E-15 | -2.63127 | 1 | 1 AC073587.1    | --     |
| ENSG00000265240 | 5.13E-15 | -2.63127 | 1 | 1 RP11-638L3.2  | K18086 |
| ENSG00000265244 | 5.13E-15 | -2.63127 | 1 | 1 AL358340.1    | --     |
| ENSG00000265245 | 5.13E-15 | -2.63127 | 1 | 1 AC073343.2    | --     |
| ENSG00000265246 | 5.13E-15 | -2.63127 | 1 | 1 RP11-663N22.1 | --     |
| ENSG00000265247 | 5.13E-15 | -2.63127 | 1 | 1 MIR4472-1     | --     |
| ENSG00000265249 | 5.13E-15 | -2.63127 | 1 | 1 AC025280.1    | --     |
| ENSG00000265250 | 5.13E-15 | -2.63127 | 1 | 1 AL132709.3    | --     |
| ENSG00000265251 | 5.13E-15 | -2.63127 | 1 | 1 MIR4288       | --     |
| ENSG00000265252 | 5.13E-15 | -2.63127 | 1 | 1 MIR3132       | --     |
| ENSG00000265253 | 5.13E-15 | -2.63127 | 1 | 1 MIR4446       | --     |
| ENSG00000265254 | 5.13E-15 | -2.63127 | 1 | 1 CTD-2350C19.2 | --     |
| ENSG00000265257 | 5.13E-15 | -2.63127 | 1 | 1 RP11-21J18.1  | --     |
| ENSG00000265258 | 5.13E-15 | -2.63127 | 1 | 1 MIR4686       | --     |
| ENSG00000265259 | 5.13E-15 | -2.63127 | 1 | 1 RN7SL247P     | --     |
| ENSG00000265260 | 5.13E-15 | -2.63127 | 1 | 1 RN7SL74P      | --     |
| ENSG00000265262 | 5.13E-15 | -2.63127 | 1 | 1 RP11-180P8.2  | K15448 |
| ENSG00000265263 | 5.13E-15 | -2.63127 | 1 | 1 RP11-135L13.4 | --     |
| ENSG00000265265 | 5.13E-15 | -2.63127 | 1 | 1 RP11-822E23.7 | --     |
| ENSG00000265266 | 5.13E-15 | -2.63127 | 1 | 1 AC022681.1    | --     |
| ENSG00000265267 | 5.13E-15 | -2.63127 | 1 | 1 AL121652.3    | --     |
| ENSG00000265268 | 5.13E-15 | -2.63127 | 1 | 1 AL356140.1    | --     |
| ENSG00000265270 | 5.13E-15 | -2.63127 | 1 | 1 AP000539.2    | --     |
| ENSG00000265272 | 5.13E-15 | -2.63127 | 1 | 1 RN7SL693P     | --     |
| ENSG00000265273 | 5.13E-15 | -2.63127 | 1 | 1 PGDP1         | K00033 |
| ENSG00000265275 | 5.13E-15 | -2.63127 | 1 | 1 AF104455.1    | --     |

|                 |          |          |   |                   |        |
|-----------------|----------|----------|---|-------------------|--------|
| ENSG00000265279 | 5.13E-15 | -2.63127 | 1 | 1 RP11-5316.5     | K03255 |
| ENSG00000265281 | 5.13E-15 | -2.63127 | 1 | 1 MIR3935         | --     |
| ENSG00000265284 | 5.13E-15 | -2.63127 | 1 | 1 MIR4770         | --     |
| ENSG00000265285 | 5.13E-15 | -2.63127 | 1 | 1 AL591379.1      | --     |
| ENSG00000265286 | 5.13E-15 | -2.63127 | 1 | 1 AL603650.3      | --     |
| ENSG00000265291 | 5.13E-15 | -2.63127 | 1 | 1 MIR4710         | --     |
| ENSG00000265292 | 5.13E-15 | -2.63127 | 1 | 1 RN7SL195P       | --     |
| ENSG00000265294 | 5.13E-15 | -2.63127 | 1 | 1 AL671883.1      | --     |
| ENSG00000265295 | 5.13E-15 | -2.63127 | 1 | 1 AC084125.3      | --     |
| ENSG00000265296 | 5.13E-15 | -2.63127 | 1 | 1 FEM1AP2         | --     |
| ENSG00000265300 | 5.13E-15 | -2.63127 | 1 | 1 AC007731.1      | --     |
| ENSG00000265301 | 5.13E-15 | -2.63127 | 1 | 1 MIR548AD        | --     |
| ENSG00000265303 | 5.13E-15 | -2.63127 | 1 | 1 CTD-2510F5.6    | K18734 |
| ENSG00000265304 | 5.13E-15 | -2.63127 | 1 | 1 MIR3650         | --     |
| ENSG00000265306 | 5.13E-15 | -2.63127 | 1 | 1 hsa-mir-3195    | --     |
| ENSG00000265311 | 5.13E-15 | -2.63127 | 1 | 1 AL020993.1      | --     |
| ENSG00000265313 | 5.13E-15 | -2.63127 | 1 | 1 RP11-567L7.6    | --     |
| ENSG00000265315 | 5.13E-15 | -2.63127 | 1 | 1 RN7SL199P       | --     |
| ENSG00000265316 | 5.13E-15 | -2.63127 | 1 | 1 RP11-286N3.1    | --     |
| ENSG00000265319 | 5.13E-15 | -2.63127 | 1 | 1 RN7SL847P       | --     |
| ENSG00000265320 | 5.13E-15 | -2.63127 | 1 | 1 AL391650.1      | --     |
| ENSG00000265322 | 5.13E-15 | -2.63127 | 1 | 1 MIR3118-6       | --     |
| ENSG00000265324 | 5.13E-15 | -2.63127 | 1 | 1 AC005020.1      | --     |
| ENSG00000265327 | 5.13E-15 | -2.63127 | 1 | 1 RN7SL411P       | --     |
| ENSG00000265328 | 5.13E-15 | -2.63127 | 1 | 1 MIR548AB        | --     |
| ENSG00000265329 | 5.13E-15 | -2.63127 | 1 | 1 MIR4758         | --     |
| ENSG00000265330 | 5.13E-15 | -2.63127 | 1 | 1 AC034187.4      | --     |
| ENSG00000265331 | 5.13E-15 | -2.63127 | 1 | 1 MIR4524B        | --     |
| ENSG00000265332 | 5.13E-15 | -2.63127 | 1 | 1 AC017028.6      | --     |
| ENSG00000265333 | 5.13E-15 | -2.63127 | 1 | 1 MIR3137         | --     |
| ENSG00000265334 | 5.13E-15 | -2.63127 | 1 | 1 CTD-2349P21.11  | --     |
| ENSG00000265335 | 5.13E-15 | -2.63127 | 1 | 1 snoMe28S-Am2634 | --     |
| ENSG00000265337 | 5.13E-15 | -2.63127 | 1 | 1 RP11-466A19.5   | --     |
| ENSG00000265339 | 5.13E-15 | -2.63127 | 1 | 1 AC011477.1      | --     |
| ENSG00000265340 | 5.13E-15 | -2.63127 | 1 | 1 OR4K7P          | K04257 |
| ENSG00000265341 | 5.13E-15 | -2.63127 | 1 | 1 AC092332.1      | --     |
| ENSG00000265344 | 5.13E-15 | -2.63127 | 1 | 1 AP001992.1      | --     |
| ENSG00000265347 | 5.13E-15 | -2.63127 | 1 | 1 MIR4291         | --     |
| ENSG00000265349 | 5.13E-15 | -2.63127 | 1 | 1 RP11-55L4.2     | --     |
| ENSG00000265350 | 5.13E-15 | -2.63127 | 1 | 1 RN7SL355P       | --     |
| ENSG00000265352 | 5.13E-15 | -2.63127 | 1 | 1 RP11-723G8.2    | --     |
| ENSG00000265353 | 5.13E-15 | -2.63127 | 1 | 1 AC020895.1      | --     |
| ENSG00000265355 | 5.13E-15 | -2.63127 | 1 | 1 MIR3136         | --     |
| ENSG00000265356 | 5.13E-15 | -2.63127 | 1 | 1 RP11-17M24.1    | --     |
| ENSG00000265357 | 5.13E-15 | -2.63127 | 1 | 1 MIR4493         | --     |
| ENSG00000265359 | 5.13E-15 | -2.63127 | 1 | 1 RP5-1110E20.1   | --     |
| ENSG00000265361 | 5.13E-15 | -2.63127 | 1 | 1 RN7SL867P       | --     |
| ENSG00000265362 | 5.13E-15 | -2.63127 | 1 | 1 AL358133.1      | --     |
| ENSG00000265364 | 5.13E-15 | -2.63127 | 1 | 1 AC010323.1      | --     |
| ENSG00000265367 | 5.13E-15 | -2.63127 | 1 | 1 AL160269.1      | --     |
| ENSG00000265368 | 5.13E-15 | -2.63127 | 1 | 1 MIR4476         | --     |
| ENSG00000265370 | 5.13E-15 | -2.63127 | 1 | 1 MIR4682         | --     |
| ENSG00000265371 | 5.13E-15 | -2.63127 | 1 | 1 MIR3198-2       | --     |
| ENSG00000265372 | 5.13E-15 | -2.63127 | 1 | 1 MIR4675         | --     |
| ENSG00000265373 | 5.13E-15 | -2.63127 | 1 | 1 hsa-mir-3180-3  | --     |
| ENSG00000265374 | 5.13E-15 | -2.63127 | 1 | 1 RP11-57J16.1    | --     |
| ENSG00000265375 | 5.13E-15 | -2.63127 | 1 | 1 MIR4679-2       | --     |
| ENSG00000265376 | 5.13E-15 | -2.63127 | 1 | 1 hsa-mir-466     | --     |

|                 |          |          |   |                   |        |
|-----------------|----------|----------|---|-------------------|--------|
| ENSG00000265378 | 5.13E-15 | -2.63127 | 1 | 1 RP11-123I22.1   | --     |
| ENSG00000265379 | 5.13E-15 | -2.63127 | 1 | 1 AC008752.2      | --     |
| ENSG00000265380 | 5.13E-15 | -2.63127 | 1 | 1 RP11-126K15.1   | --     |
| ENSG00000265381 | 5.13E-15 | -2.63127 | 1 | 1 AL121987.1      | --     |
| ENSG00000265382 | 5.13E-15 | -2.63127 | 1 | 1 RN7SL365P       | --     |
| ENSG00000265388 | 5.13E-15 | -2.63127 | 1 | 1 RN7SL391P       | --     |
| ENSG00000265390 | 5.13E-15 | -2.63127 | 1 | 1 MIR4999         | --     |
| ENSG00000265391 | 5.13E-15 | -2.63127 | 1 | 1 AC112504.1      | --     |
| ENSG00000265392 | 5.13E-15 | -2.63127 | 1 | 1 MIR4252         | --     |
| ENSG00000265396 | 5.13E-15 | -2.63127 | 1 | 1 MIR3128         | --     |
| ENSG00000265398 | 5.13E-15 | -2.63127 | 1 | 1 AL139239.1      | --     |
| ENSG00000265400 | 5.13E-15 | -2.63127 | 1 | 1 RP11-471L13.2   | --     |
| ENSG00000265401 | 5.13E-15 | -2.63127 | 1 | 1 RP11-138I1.4    | --     |
| ENSG00000265402 | 5.13E-15 | -2.63127 | 1 | 1 RSL24D1P9       | K02896 |
| ENSG00000265404 | 5.13E-15 | -2.63127 | 1 | 1 AC099796.1      | --     |
| ENSG00000265406 | 5.13E-15 | -2.63127 | 1 | 1 AP000539.3      | --     |
| ENSG00000265408 | 5.13E-15 | -2.63127 | 1 | 1 RP11-361L15.4   | --     |
| ENSG00000265411 | 5.13E-15 | -2.63127 | 1 | 1 RN7SL656P       | --     |
| ENSG00000265414 | 5.13E-15 | -2.63127 | 1 | 1 RN7SL729P       | --     |
| ENSG00000265416 | 5.13E-15 | -2.63127 | 1 | 1 AC017028.7      | --     |
| ENSG00000265418 | 5.13E-15 | -2.63127 | 1 | 1 MIR4261         | --     |
| ENSG00000265419 | 5.13E-15 | -2.63127 | 1 | 1 AL359987.1      | --     |
| ENSG00000265420 | 5.13E-15 | -2.63127 | 1 | 1 MIR4779         | --     |
| ENSG00000265421 | 5.13E-15 | -2.63127 | 1 | 1 MIR4459         | --     |
| ENSG00000265422 | 5.13E-15 | -2.63127 | 1 | 1 MIR4684         | --     |
| ENSG00000265423 | 5.13E-15 | -2.63127 | 1 | 1 MIR4652         | --     |
| ENSG00000265428 | 5.13E-15 | -2.63127 | 1 | 1 RP1-56K13.6     | --     |
| ENSG00000265429 | 5.13E-15 | -2.63127 | 1 | 1 MIR4782         | --     |
| ENSG00000265430 | 5.13E-15 | -2.63127 | 1 | 1 AC108721.1      | --     |
| ENSG00000265432 | 5.13E-15 | -2.63127 | 1 | 1 MIR4308         | --     |
| ENSG00000265433 | 5.13E-15 | -2.63127 | 1 | 1 MIR4447         | --     |
| ENSG00000265435 | 5.13E-15 | -2.63127 | 1 | 1 MIR3121         | --     |
| ENSG00000265438 | 5.13E-15 | -2.63127 | 1 | 1 MIR4751         | --     |
| ENSG00000265439 | 5.13E-15 | -2.63127 | 1 | 1 RN7SL811P       | --     |
| ENSG00000265441 | 5.13E-15 | -2.63127 | 1 | 1 AL132768.1      | --     |
| ENSG00000265442 | 5.13E-15 | -2.63127 | 1 | 1 MIR3941         | --     |
| ENSG00000265443 | 5.13E-15 | -2.63127 | 1 | 1 CTD-2349P21.6   | --     |
| ENSG00000265444 | 5.13E-15 | -2.63127 | 1 | 1 MIR4733         | --     |
| ENSG00000265453 | 5.13E-15 | -2.63127 | 1 | 1 RP11-173M1.3    | --     |
| ENSG00000265454 | 5.13E-15 | -2.63127 | 1 | 1 AC012362.1      | --     |
| ENSG00000265455 | 5.13E-15 | -2.63127 | 1 | 1 MIR4700         | --     |
| ENSG00000265456 | 5.13E-15 | -2.63127 | 1 | 1 MIR3672         | --     |
| ENSG00000265457 | 5.13E-15 | -2.63127 | 1 | 1 AC093611.2      | --     |
| ENSG00000265460 | 5.13E-15 | -2.63127 | 1 | 1 RP11-690G19.4   | K09275 |
| ENSG00000265461 | 5.13E-15 | -2.63127 | 1 | 1 AC068014.2      | --     |
| ENSG00000265466 | 5.13E-15 | -2.63127 | 1 | 1 AL583842.2      | --     |
| ENSG00000265467 | 5.13E-15 | -2.63127 | 1 | 1 AC090559.1      | --     |
| ENSG00000265469 | 5.13E-15 | -2.63127 | 1 | 1 POLR3KP2        | K03019 |
| ENSG00000265470 | 5.13E-15 | -2.63127 | 1 | 1 MIR548AQ        | --     |
| ENSG00000265471 | 5.13E-15 | -2.63127 | 1 | 1 AL034400.1      | --     |
| ENSG00000265472 | 5.13E-15 | -2.63127 | 1 | 1 RP11-28O3.1     | --     |
| ENSG00000265477 | 5.13E-15 | -2.63127 | 1 | 1 RP11-720L2.2    | --     |
| ENSG00000265479 | 5.13E-15 | -2.63127 | 1 | 1 DTX2P1-UPK3BP1- | --     |
| ENSG00000265481 | 5.13E-15 | -2.63127 | 1 | 1 AP006564.1      | --     |
| ENSG00000265483 | 5.13E-15 | -2.63127 | 1 | 1 MIR4443         | --     |
| ENSG00000265484 | 5.13E-15 | -2.63127 | 1 | 1 RP11-47G4.2     | --     |
| ENSG00000265486 | 5.13E-15 | -2.63127 | 1 | 1 RN7SL518P       | --     |
| ENSG00000265487 | 5.13E-15 | -2.63127 | 1 | 1 RP11-793A3.1    | --     |



|                 |          |          |   |                   |        |
|-----------------|----------|----------|---|-------------------|--------|
| ENSG00000265488 | 5.13E-15 | -2.63127 | 1 | 1 AL359314.1      | --     |
| ENSG00000265489 | 5.13E-15 | -2.63127 | 1 | 1 RP11-1090M7.1   | --     |
| ENSG00000265493 | 5.13E-15 | -2.63127 | 1 | 1 AC105914.1      | --     |
| ENSG00000265494 | 5.13E-15 | -2.63127 | 1 | 1 RP11-131K5.2    | --     |
| ENSG00000265498 | 5.13E-15 | -2.63127 | 1 | 1 AL158051.1      | --     |
| ENSG00000265499 | 5.13E-15 | -2.63127 | 1 | 1 MIR3156-2       | --     |
| ENSG00000265501 | 5.13E-15 | -2.63127 | 1 | 1 AC005549.2      | --     |
| ENSG00000265502 | 5.13E-15 | -2.63127 | 1 | 1 RN7SL746P       | --     |
| ENSG00000265503 | 5.13E-15 | -2.63127 | 1 | 1 MIR1269B        | --     |
| ENSG00000265504 | 5.13E-15 | -2.63127 | 1 | 1 AC130689.1      | --     |
| ENSG00000265506 | 5.13E-15 | -2.63127 | 1 | 1 AC004656.1      | --     |
| ENSG00000265510 | 5.13E-15 | -2.63127 | 1 | 1 MIR4436A        | --     |
| ENSG00000265513 | 5.13E-15 | -2.63127 | 1 | 1 hsa-mir-3673    | --     |
| ENSG00000265514 | 5.13E-15 | -2.63127 | 1 | 1 RP11-92G19.2    | --     |
| ENSG00000265515 | 5.13E-15 | -2.63127 | 1 | 1 AC092287.1      | --     |
| ENSG00000265516 | 5.13E-15 | -2.63127 | 1 | 1 Z84488.1        | --     |
| ENSG00000265517 | 5.13E-15 | -2.63127 | 1 | 1 AL122127.2      | --     |
| ENSG00000265518 | 5.13E-15 | -2.63127 | 1 | 1 AL109615.1      | --     |
| ENSG00000265519 | 5.13E-15 | -2.63127 | 1 | 1 CTD-3157E16.1   | --     |
| ENSG00000265520 | 5.13E-15 | -2.63127 | 1 | 1 MIR548V         | --     |
| ENSG00000265521 | 5.13E-15 | -2.63127 | 1 | 1 MIR5697         | --     |
| ENSG00000265522 | 5.13E-15 | -2.63127 | 1 | 1 AC097473.1      | --     |
| ENSG00000265523 | 5.13E-15 | -2.63127 | 1 | 1 AC073647.1      | --     |
| ENSG00000265524 | 5.13E-15 | -2.63127 | 1 | 1 AC134300.1      | --     |
| ENSG00000265526 | 5.13E-15 | -2.63127 | 1 | 1 MIR4304         | --     |
| ENSG00000265529 | 5.13E-15 | -2.63127 | 1 | 1 AL031721.1      | --     |
| ENSG00000265530 | 5.13E-15 | -2.63127 | 1 | 1 AL121594.1      | --     |
| ENSG00000265532 | 5.13E-15 | -2.63127 | 1 | 1 RN7SL243P       | --     |
| ENSG00000265533 | 5.13E-15 | -2.63127 | 1 | 1 RP11-638L3.1    | --     |
| ENSG00000265534 | 5.13E-15 | -2.63127 | 1 | 1 AL512638.1      | --     |
| ENSG00000265535 | 5.13E-15 | -2.63127 | 1 | 1 RN7SL475P       | --     |
| ENSG00000265536 | 5.13E-15 | -2.63127 | 1 | 1 AL591042.1      | --     |
| ENSG00000265537 | 5.13E-15 | -2.63127 | 1 | 1 hsa-mir-3180-3  | --     |
| ENSG00000265538 | 5.13E-15 | -2.63127 | 1 | 1 MIR4421         | --     |
| ENSG00000265539 | 5.13E-15 | -2.63127 | 1 | 1 MIR3164         | --     |
| ENSG00000265541 | 5.13E-15 | -2.63127 | 1 | 1 H3F3BP2         | K11253 |
| ENSG00000265542 | 5.13E-15 | -2.63127 | 1 | 1 RP11-60A24.3    | --     |
| ENSG00000265543 | 5.13E-15 | -2.63127 | 1 | 1 AL451010.1      | --     |
| ENSG00000265544 | 5.13E-15 | -2.63127 | 1 | 1 RP11-31I22.1    | --     |
| ENSG00000265545 | 5.13E-15 | -2.63127 | 1 | 1 RP11-183C12.1   | K03872 |
| ENSG00000265546 | 5.13E-15 | -2.63127 | 1 | 1 RN7SL289P       | --     |
| ENSG00000265547 | 5.13E-15 | -2.63127 | 1 | 1 RP11-293E1.2    | --     |
| ENSG00000265550 | 5.13E-15 | -2.63127 | 1 | 1 AC097382.1      | --     |
| ENSG00000265552 | 5.13E-15 | -2.63127 | 1 | 1 RP11-958F21.3   | --     |
| ENSG00000265553 | 5.13E-15 | -2.63127 | 1 | 1 AC013275.1      | --     |
| ENSG00000265554 | 5.13E-15 | -2.63127 | 1 | 1 RP11-419J16.1   | --     |
| ENSG00000265555 | 5.13E-15 | -2.63127 | 1 | 1 RP11-638L3.3    | --     |
| ENSG00000265556 | 5.13E-15 | -2.63127 | 1 | 1 RP11-434D2.2    | --     |
| ENSG00000265558 | 5.13E-15 | -2.63127 | 1 | 1 MIR3918         | --     |
| ENSG00000265559 | 5.13E-15 | -2.63127 | 1 | 1 RN7SL652P       | --     |
| ENSG00000265560 | 5.13E-15 | -2.63127 | 1 | 1 AC098612.1      | --     |
| ENSG00000265561 | 5.13E-15 | -2.63127 | 1 | 1 AC025458.1      | --     |
| ENSG00000265562 | 5.13E-15 | -2.63127 | 1 | 1 AC104037.1      | --     |
| ENSG00000265564 | 5.13E-15 | -2.63127 | 1 | 1 PIGPP4          | K03861 |
| ENSG00000265565 | 5.13E-15 | -2.63127 | 1 | 1 MIR3143         | --     |
| ENSG00000265566 | 5.13E-15 | -2.63127 | 1 | 1 RN7SL605P       | --     |
| ENSG00000265567 | 5.13E-15 | -2.63127 | 1 | 1 RP11-1109M24.13 | --     |
| ENSG00000265568 | 5.13E-15 | -2.63127 | 1 | 1 AC091043.1      | --     |

|                 |          |          |   |                 |        |
|-----------------|----------|----------|---|-----------------|--------|
| ENSG00000265569 | 5.13E-15 | -2.63127 | 1 | 1 AC011453.1    | --     |
| ENSG00000265572 | 5.13E-15 | -2.63127 | 1 | 1 AL391117.1    | --     |
| ENSG00000265573 | 5.13E-15 | -2.63127 | 1 | 1 AC004943.1    | --     |
| ENSG00000265575 | 5.13E-15 | -2.63127 | 1 | 1 MIR4784       | --     |
| ENSG00000265577 | 5.13E-15 | -2.63127 | 1 | 1 RN7SL9P       | --     |
| ENSG00000265579 | 5.13E-15 | -2.63127 | 1 | 1 RP11-713C5.1  | --     |
| ENSG00000265580 | 5.13E-15 | -2.63127 | 1 | 1 AC091042.1    | --     |
| ENSG00000265582 | 5.13E-15 | -2.63127 | 1 | 1 AL034553.1    | --     |
| ENSG00000265583 | 5.13E-15 | -2.63127 | 1 | 1 AC011994.1    | --     |
| ENSG00000265584 | 5.13E-15 | -2.63127 | 1 | 1 MIR3978       | --     |
| ENSG00000265585 | 5.13E-15 | -2.63127 | 1 | 1 AL161421.1    | --     |
| ENSG00000265587 | 5.13E-15 | -2.63127 | 1 | 1 AC068580.1    | --     |
| ENSG00000265588 | 5.13E-15 | -2.63127 | 1 | 1 MIR5708       | --     |
| ENSG00000265589 | 5.13E-15 | -2.63127 | 1 | 1 AL359753.1    | --     |
| ENSG00000265591 | 5.13E-15 | -2.63127 | 1 | 1 AC119751.5    | --     |
| ENSG00000265592 | 5.13E-15 | -2.63127 | 1 | 1 RN7SL92P      | --     |
| ENSG00000265593 | 5.13E-15 | -2.63127 | 1 | 1 NPM1P45       | K11276 |
| ENSG00000265595 | 5.13E-15 | -2.63127 | 1 | 1 MIR4756       | --     |
| ENSG00000265596 | 5.13E-15 | -2.63127 | 1 | 1 MIR3659       | --     |
| ENSG00000265597 | 5.13E-15 | -2.63127 | 1 | 1 AL590764.1    | --     |
| ENSG00000265598 | 5.13E-15 | -2.63127 | 1 | 1 MIR5707       | --     |
| ENSG00000265599 | 5.13E-15 | -2.63127 | 1 | 1 MIR4471       | --     |
| ENSG00000265600 | 5.13E-15 | -2.63127 | 1 | 1 AC006480.1    | --     |
| ENSG00000265601 | 5.13E-15 | -2.63127 | 1 | 1 AL845321.1    | --     |
| ENSG00000265603 | 5.13E-15 | -2.63127 | 1 | 1 RN7SL133P     | --     |
| ENSG00000265605 | 5.13E-15 | -2.63127 | 1 | 1 RN7SL422P     | --     |
| ENSG00000265606 | 5.13E-15 | -2.63127 | 1 | 1 MIR4695       | --     |
| ENSG00000265610 | 5.13E-15 | -2.63127 | 1 | 1 CR536603.1    | --     |
| ENSG00000265612 | 5.13E-15 | -2.63127 | 1 | 1 hsa-mir-4539  | --     |
| ENSG00000265613 | 5.13E-15 | -2.63127 | 1 | 1 AC143336.1    | --     |
| ENSG00000265614 | 5.13E-15 | -2.63127 | 1 | 1 RP11-521P1.1  | --     |
| ENSG00000265615 | 5.13E-15 | -2.63127 | 1 | 1 AC108105.1    | --     |
| ENSG00000265616 | 5.13E-15 | -2.63127 | 1 | 1 AC136932.2    | --     |
| ENSG00000265617 | 5.13E-15 | -2.63127 | 1 | 1 MIR548AG2     | --     |
| ENSG00000265618 | 5.13E-15 | -2.63127 | 1 | 1 CTB-96E2.7    | --     |
| ENSG00000265619 | 5.13E-15 | -2.63127 | 1 | 1 AC093824.1    | --     |
| ENSG00000265621 | 5.13E-15 | -2.63127 | 1 | 1 AC013476.1    | --     |
| ENSG00000265623 | 5.13E-15 | -2.63127 | 1 | 1 MIR3139       | --     |
| ENSG00000265624 | 5.13E-15 | -2.63127 | 1 | 1 RN7SL166P     | --     |
| ENSG00000265626 | 5.13E-15 | -2.63127 | 1 | 1 AC139085.2    | K02985 |
| ENSG00000265627 | 5.13E-15 | -2.63127 | 1 | 1 AC093807.1    | --     |
| ENSG00000265628 | 5.13E-15 | -2.63127 | 1 | 1 RN7SL723P     | --     |
| ENSG00000265629 | 5.13E-15 | -2.63127 | 1 | 1 AC011897.1    | --     |
| ENSG00000265631 | 5.13E-15 | -2.63127 | 1 | 1 BNIP3P3       | K15464 |
| ENSG00000265632 | 5.13E-15 | -2.63127 | 1 | 1 AC069240.1    | --     |
| ENSG00000265635 | 5.13E-15 | -2.63127 | 1 | 1 MIR3612       | --     |
| ENSG00000265636 | 5.13E-15 | -2.63127 | 1 | 1 AC100787.1    | --     |
| ENSG00000265637 | 5.13E-15 | -2.63127 | 1 | 1 AC010235.1    | --     |
| ENSG00000265639 | 5.13E-15 | -2.63127 | 1 | 1 RP11-529J17.1 | --     |
| ENSG00000265641 | 5.13E-15 | -2.63127 | 1 | 1 MIR3929       | --     |
| ENSG00000265642 | 5.13E-15 | -2.63127 | 1 | 1 AL034375.1    | --     |
| ENSG00000265643 | 5.13E-15 | -2.63127 | 1 | 1 RP11-465I4.2  | --     |
| ENSG00000265644 | 5.13E-15 | -2.63127 | 1 | 1 RP11-451L19.1 | --     |
| ENSG00000265645 | 5.13E-15 | -2.63127 | 1 | 1 AC092038.2    | --     |
| ENSG00000265646 | 5.13E-15 | -2.63127 | 1 | 1 TUFMP1        | K02358 |
| ENSG00000265649 | 5.13E-15 | -2.63127 | 1 | 1 MIR4709       | --     |
| ENSG00000265650 | 5.13E-15 | -2.63127 | 1 | 1 AC012627.1    | --     |
| ENSG00000265653 | 5.13E-15 | -2.63127 | 1 | 1 MIR548AK      | --     |

|                 |          |          |   |                    |        |
|-----------------|----------|----------|---|--------------------|--------|
| ENSG00000265655 | 5.13E-15 | -2.63127 | 1 | 1 AC069280.1       | --     |
| ENSG00000265657 | 5.13E-15 | -2.63127 | 1 | 1 MIR3151          | --     |
| ENSG00000265658 | 5.13E-15 | -2.63127 | 1 | 1 MIR3690          | --     |
| ENSG00000265662 | 5.13E-15 | -2.63127 | 1 | 1 AL354981.1       | --     |
| ENSG00000265664 | 5.13E-15 | -2.63127 | 1 | 1 RP11-74H8.1      | --     |
| ENSG00000265665 | 5.13E-15 | -2.63127 | 1 | 1 AC008391.1       | --     |
| ENSG00000265667 | 5.13E-15 | -2.63127 | 1 | 1 AP003550.1       | --     |
| ENSG00000265669 | 5.13E-15 | -2.63127 | 1 | 1 MIR548AJ1        | --     |
| ENSG00000265670 | 5.13E-15 | -2.63127 | 1 | 1 RP11-25I11.1     | --     |
| ENSG00000265671 | 5.13E-15 | -2.63127 | 1 | 1 RP11-672L10.3    | --     |
| ENSG00000265672 | 5.13E-15 | -2.63127 | 1 | 1 MIR4722          | --     |
| ENSG00000265673 | 5.13E-15 | -2.63127 | 1 | 1 MIR4508          | --     |
| ENSG00000265675 | 5.13E-15 | -2.63127 | 1 | 1 RN7SL708P        | --     |
| ENSG00000265676 | 5.13E-15 | -2.63127 | 1 | 1 RN7SL64P         | --     |
| ENSG00000265679 | 5.13E-15 | -2.63127 | 1 | 1 AL139328.1       | --     |
| ENSG00000265680 | 5.13E-15 | -2.63127 | 1 | 1 RN7SL620P        | --     |
| ENSG00000265682 | 5.13E-15 | -2.63127 | 1 | 1 MIR4267          | --     |
| ENSG00000265684 | 5.13E-15 | -2.63127 | 1 | 1 RN7SL378P        | --     |
| ENSG00000265686 | 5.13E-15 | -2.63127 | 1 | 1 AL109749.1       | --     |
| ENSG00000265687 | 5.13E-15 | -2.63127 | 1 | 1 AC016178.1       | --     |
| ENSG00000265689 | 5.13E-15 | -2.63127 | 1 | 1 RP11-118G23.1    | --     |
| ENSG00000265690 | 5.13E-15 | -2.63127 | 1 | 1 RP11-5A19.5      | K09417 |
| ENSG00000265691 | 5.13E-15 | -2.63127 | 1 | 1 MIR4460          | --     |
| ENSG00000265693 | 5.13E-15 | -2.63127 | 1 | 1 RP11-815I9.5     | K09228 |
| ENSG00000265694 | 5.13E-15 | -2.63127 | 1 | 1 MIR4774          | --     |
| ENSG00000265695 | 5.13E-15 | -2.63127 | 1 | 1 MIR3064          | --     |
| ENSG00000265696 | 5.13E-15 | -2.63127 | 1 | 1 AP003064.2       | --     |
| ENSG00000265697 | 5.13E-15 | -2.63127 | 1 | 1 RP11-31I22.4     | --     |
| ENSG00000265698 | 5.13E-15 | -2.63127 | 1 | 1 RP11-41O4.3      | K15191 |
| ENSG00000265699 | 5.13E-15 | -2.63127 | 1 | 1 MIR548AE2        | --     |
| ENSG00000265700 | 5.13E-15 | -2.63127 | 1 | 1 MIR4647          | --     |
| ENSG00000265704 | 5.13E-15 | -2.63127 | 1 | 1 AC010595.1       | --     |
| ENSG00000265705 | 5.13E-15 | -2.63127 | 1 | 1 RP11-744K17.8    | --     |
| ENSG00000265706 | 5.13E-15 | -2.63127 | 1 | 1 SNORD53_SNORD5   | --     |
| ENSG00000265708 | 5.13E-15 | -2.63127 | 1 | 1 AC027348.1       | --     |
| ENSG00000265709 | 5.13E-15 | -2.63127 | 1 | 1 AC019046.1       | --     |
| ENSG00000265710 | 5.13E-15 | -2.63127 | 1 | 1 AL161772.1       | --     |
| ENSG00000265711 | 5.13E-15 | -2.63127 | 1 | 1 AL049871.1       | --     |
| ENSG00000265712 | 5.13E-15 | -2.63127 | 1 | 1 RP11-440L16.1    | --     |
| ENSG00000265714 | 5.13E-15 | -2.63127 | 1 | 1 AL122127.3       | --     |
| ENSG00000265717 | 5.13E-15 | -2.63127 | 1 | 1 RP11-94B19.7     | --     |
| ENSG00000265719 | 5.13E-15 | -2.63127 | 1 | 1 MIR4681          | --     |
| ENSG00000265720 | 5.13E-15 | -2.63127 | 1 | 1 AC097470.1       | --     |
| ENSG00000265722 | 5.13E-15 | -2.63127 | 1 | 1 AC099326.1       | --     |
| ENSG00000265724 | 5.13E-15 | -2.63127 | 1 | 1 MIR4284          | --     |
| ENSG00000265725 | 5.13E-15 | -2.63127 | 1 | 1 MIR3144          | --     |
| ENSG00000265727 | 5.13E-15 | -2.63127 | 1 | 1 RN7SL648P        | --     |
| ENSG00000265728 | 5.13E-15 | -2.63127 | 1 | 1 RP11-883A18.3    | --     |
| ENSG00000265730 | 5.13E-15 | -2.63127 | 1 | 1 AC090349.1       | --     |
| ENSG00000265731 | 5.13E-15 | -2.63127 | 1 | 1 RN7SL522P        | --     |
| ENSG00000265734 | 5.13E-15 | -2.63127 | 1 | 1 MIR4438          | --     |
| ENSG00000265735 | 5.13E-15 | -2.63127 | 1 | 1 RN7SL5P          | --     |
| ENSG00000265736 | 5.13E-15 | -2.63127 | 1 | 1 AL049539.1       | --     |
| ENSG00000265737 | 5.13E-15 | -2.63127 | 1 | 1 RP11-1157N2__B.2 | --     |
| ENSG00000265739 | 5.13E-15 | -2.63127 | 1 | 1 RP11-354P11.3    | --     |
| ENSG00000265740 | 5.13E-15 | -2.63127 | 1 | 1 RN7SL339P        | --     |
| ENSG00000265741 | 5.13E-15 | -2.63127 | 1 | 1 RN7SL406P        | --     |
| ENSG00000265743 | 5.13E-15 | -2.63127 | 1 | 1 RP11-848P1.3     | --     |

|                 |          |          |   |                  |        |
|-----------------|----------|----------|---|------------------|--------|
| ENSG00000265744 | 5.13E-15 | -2.63127 | 1 | 1 MIR4427        | --     |
| ENSG00000265745 | 5.13E-15 | -2.63127 | 1 | 1 RN7SL375P      | --     |
| ENSG00000265746 | 5.13E-15 | -2.63127 | 1 | 1 KYNUP2         | K01556 |
| ENSG00000265747 | 5.13E-15 | -2.63127 | 1 | 1 RN7SL298P      | --     |
| ENSG00000265748 | 5.13E-15 | -2.63127 | 1 | 1 AC125387.1     | --     |
| ENSG00000265751 | 5.13E-15 | -2.63127 | 1 | 1 RP11-296E23.1  | --     |
| ENSG00000265753 | 5.13E-15 | -2.63127 | 1 | 1 RN7SL444P      | --     |
| ENSG00000265758 | 5.13E-15 | -2.63127 | 1 | 1 RP11-595B24.1  | --     |
| ENSG00000265759 | 5.13E-15 | -2.63127 | 1 | 1 AC020934.1     | --     |
| ENSG00000265764 | 5.13E-15 | -2.63127 | 1 | 1 AL662890.3     | --     |
| ENSG00000265766 | 5.13E-15 | -2.63127 | 1 | 1 CXADRP3        | --     |
| ENSG00000265767 | 5.13E-15 | -2.63127 | 1 | 1 MIR4745        | --     |
| ENSG00000265768 | 5.13E-15 | -2.63127 | 1 | 1 MIR4506        | --     |
| ENSG00000265769 | 5.13E-15 | -2.63127 | 1 | 1 AL589663.1     | --     |
| ENSG00000265770 | 5.13E-15 | -2.63127 | 1 | 1 RN7SL660P      | --     |
| ENSG00000265771 | 5.13E-15 | -2.63127 | 1 | 1 AL592205.2     | --     |
| ENSG00000265774 | 5.13E-15 | -2.63127 | 1 | 1 AC098870.1     | --     |
| ENSG00000265775 | 5.13E-15 | -2.63127 | 1 | 1 CTC-304I17.3   | --     |
| ENSG00000265776 | 5.13E-15 | -2.63127 | 1 | 1 hsa-mir-3670-2 | --     |
| ENSG00000265777 | 5.13E-15 | -2.63127 | 1 | 1 RN7SL624P      | --     |
| ENSG00000265778 | 5.13E-15 | -2.63127 | 1 | 1 RP11-17M16.2   | --     |
| ENSG00000265780 | 5.13E-15 | -2.63127 | 1 | 1 RP11-449L23.3  | --     |
| ENSG00000265781 | 5.13E-15 | -2.63127 | 1 | 1 RP11-384E22.1  | --     |
| ENSG00000265783 | 5.13E-15 | -2.63127 | 1 | 1 AP000445.3     | --     |
| ENSG00000265784 | 5.13E-15 | -2.63127 | 1 | 1 RP1-56K13.3    | --     |
| ENSG00000265786 | 5.13E-15 | -2.63127 | 1 | 1 RP11-527H14.6  | --     |
| ENSG00000265787 | 5.13E-15 | -2.63127 | 1 | 1 CYP4F35P       | --     |
| ENSG00000265788 | 5.13E-15 | -2.63127 | 1 | 1 RP11-19P22.5   | --     |
| ENSG00000265789 | 5.13E-15 | -2.63127 | 1 | 1 MIR4330        | --     |
| ENSG00000265790 | 5.13E-15 | -2.63127 | 1 | 1 RNASEH1P1      | K03469 |
| ENSG00000265793 | 5.13E-15 | -2.63127 | 1 | 1 MIR3118-4      | --     |
| ENSG00000265794 | 5.13E-15 | -2.63127 | 1 | 1 RP11-227G15.3  | --     |
| ENSG00000265796 | 5.13E-15 | -2.63127 | 1 | 1 AC084357.1     | --     |
| ENSG00000265799 | 5.13E-15 | -2.63127 | 1 | 1 RP11-387H17.6  | --     |
| ENSG00000265801 | 5.13E-15 | -2.63127 | 1 | 1 RP11-720N19.2  | --     |
| ENSG00000265803 | 5.13E-15 | -2.63127 | 1 | 1 AL590703.1     | --     |
| ENSG00000265804 | 5.13E-15 | -2.63127 | 1 | 1 AC078864.2     | --     |
| ENSG00000265810 | 5.13E-15 | -2.63127 | 1 | 1 MIR3907        | --     |
| ENSG00000265812 | 5.13E-15 | -2.63127 | 1 | 1 AC007040.1     | --     |
| ENSG00000265813 | 5.13E-15 | -2.63127 | 1 | 1 RN7SL300P      | --     |
| ENSG00000265814 | 5.13E-15 | -2.63127 | 1 | 1 RN7SL376P      | --     |
| ENSG00000265815 | 5.13E-15 | -2.63127 | 1 | 1 MIR1273G       | --     |
| ENSG00000265818 | 5.13E-15 | -2.63127 | 1 | 1 EEF1E1-BLOC1S5 | K15439 |
| ENSG00000265819 | 5.13E-15 | -2.63127 | 1 | 1 AC092832.1     | --     |
| ENSG00000265821 | 5.13E-15 | -2.63127 | 1 | 1 RN7SL739P      | --     |
| ENSG00000265822 | 5.13E-15 | -2.63127 | 1 | 1 MIR4422        | --     |
| ENSG00000265824 | 5.13E-15 | -2.63127 | 1 | 1 RN7SL232P      | --     |
| ENSG00000265826 | 5.13E-15 | -2.63127 | 1 | 1 AC087203.1     | --     |
| ENSG00000265827 | 5.13E-15 | -2.63127 | 1 | 1 MIR4680        | --     |
| ENSG00000265828 | 5.13E-15 | -2.63127 | 1 | 1 MIR3939        | --     |
| ENSG00000265829 | 5.13E-15 | -2.63127 | 1 | 1 MIR548AG1      | --     |
| ENSG00000265831 | 5.13E-15 | -2.63127 | 1 | 1 MIR3123        | --     |
| ENSG00000265833 | 5.13E-15 | -2.63127 | 1 | 1 RP1-66C13.1    | K08495 |
| ENSG00000265835 | 5.13E-15 | -2.63127 | 1 | 1 AC009800.1     | --     |
| ENSG00000265836 | 5.13E-15 | -2.63127 | 1 | 1 AC139085.1     | K10152 |
| ENSG00000265837 | 5.13E-15 | -2.63127 | 1 | 1 AC015820.1     | --     |
| ENSG00000265839 | 5.13E-15 | -2.63127 | 1 | 1 RN7SL360P      | --     |
| ENSG00000265840 | 5.13E-15 | -2.63127 | 1 | 1 AC010761.10    | --     |

|                 |          |          |   |                 |        |
|-----------------|----------|----------|---|-----------------|--------|
| ENSG00000265841 | 5.13E-15 | -2.63127 | 1 | 1 MIR548X       | --     |
| ENSG00000265842 | 5.13E-15 | -2.63127 | 1 | 1 RN7SL53P      | --     |
| ENSG00000265844 | 5.13E-15 | -2.63127 | 1 | 1 RP11-751H17.1 | --     |
| ENSG00000265845 | 5.13E-15 | -2.63127 | 1 | 1 RP11-20B24.5  | --     |
| ENSG00000265846 | 5.13E-15 | -2.63127 | 1 | 1 MIR4276       | --     |
| ENSG00000265847 | 5.13E-15 | -2.63127 | 1 | 1 MIR4287       | --     |
| ENSG00000265848 | 5.13E-15 | -2.63127 | 1 | 1 MIR3689D1     | --     |
| ENSG00000265850 | 5.13E-15 | -2.63127 | 1 | 1 MIR4797       | --     |
| ENSG00000265853 | 5.13E-15 | -2.63127 | 1 | 1 RP1-48J14.1   | --     |
| ENSG00000265855 | 5.13E-15 | -2.63127 | 1 | 1 MIR4514       | --     |
| ENSG00000265856 | 5.13E-15 | -2.63127 | 1 | 1 AL133153.1    | --     |
| ENSG00000265858 | 5.13E-15 | -2.63127 | 1 | 1 AL031176.1    | --     |
| ENSG00000265859 | 5.13E-15 | -2.63127 | 1 | 1 MIR5704       | --     |
| ENSG00000265860 | 5.13E-15 | -2.63127 | 1 | 1 RN7SL548P     | --     |
| ENSG00000265861 | 5.13E-15 | -2.63127 | 1 | 1 MIR4495       | --     |
| ENSG00000265863 | 5.13E-15 | -2.63127 | 1 | 1 RP11-805L22.2 | K12581 |
| ENSG00000265864 | 5.13E-15 | -2.63127 | 1 | 1 AC092117.2    | --     |
| ENSG00000265865 | 5.13E-15 | -2.63127 | 1 | 1 AC069285.1    | --     |
| ENSG00000265866 | 5.13E-15 | -2.63127 | 1 | 1 AC067805.1    | --     |
| ENSG00000265867 | 5.13E-15 | -2.63127 | 1 | 1 MIR4516       | --     |
| ENSG00000265868 | 5.13E-15 | -2.63127 | 1 | 1 RN7SL436P     | --     |
| ENSG00000265869 | 5.13E-15 | -2.63127 | 1 | 1 RP11-76K13.2  | --     |
| ENSG00000265870 | 5.13E-15 | -2.63127 | 1 | 1 AC026166.1    | --     |
| ENSG00000265871 | 5.13E-15 | -2.63127 | 1 | 1 MIR3174       | --     |
| ENSG00000265872 | 5.13E-15 | -2.63127 | 1 | 1 MIR3689A      | --     |
| ENSG00000265873 | 5.13E-15 | -2.63127 | 1 | 1 MIR4289       | --     |
| ENSG00000265874 | 5.13E-15 | -2.63127 | 1 | 1 MIR4489       | --     |
| ENSG00000265875 | 5.13E-15 | -2.63127 | 1 | 1 AC011357.1    | --     |
| ENSG00000265876 | 5.13E-15 | -2.63127 | 1 | 1 AC080080.1    | --     |
| ENSG00000265878 | 5.13E-15 | -2.63127 | 1 | 1 MIR3914-1     | --     |
| ENSG00000265881 | 5.13E-15 | -2.63127 | 1 | 1 PDLIM1P2      | --     |
| ENSG00000265882 | 5.13E-15 | -2.63127 | 1 | 1 RN7SL73P      | --     |
| ENSG00000265883 | 5.13E-15 | -2.63127 | 1 | 1 RP11-169I9.2  | K18194 |
| ENSG00000265885 | 5.13E-15 | -2.63127 | 1 | 1 RN7SL783P     | --     |
| ENSG00000265887 | 5.13E-15 | -2.63127 | 1 | 1 AC073136.1    | --     |
| ENSG00000265890 | 5.13E-15 | -2.63127 | 1 | 1 RN7SL537P     | --     |
| ENSG00000265891 | 5.13E-15 | -2.63127 | 1 | 1 AC017028.8    | --     |
| ENSG00000265892 | 5.13E-15 | -2.63127 | 1 | 1 RN7SL311P     | --     |
| ENSG00000265893 | 5.13E-15 | -2.63127 | 1 | 1 AL132772.1    | --     |
| ENSG00000265894 | 5.13E-15 | -2.63127 | 1 | 1 RN7SL357P     | --     |
| ENSG00000265898 | 5.13E-15 | -2.63127 | 1 | 1 AP003354.1    | --     |
| ENSG00000265899 | 5.13E-15 | -2.63127 | 1 | 1 AC007389.4    | --     |
| ENSG00000265900 | 5.13E-15 | -2.63127 | 1 | 1 RN7SL226P     | --     |
| ENSG00000265901 | 5.13E-15 | -2.63127 | 1 | 1 AC097493.1    | --     |
| ENSG00000265902 | 5.13E-15 | -2.63127 | 1 | 1 MIR4696       | --     |
| ENSG00000265904 | 5.13E-15 | -2.63127 | 1 | 1 AC005288.1    | --     |
| ENSG00000265905 | 5.13E-15 | -2.63127 | 1 | 1 RN7SL96P      | --     |
| ENSG00000265910 | 5.13E-15 | -2.63127 | 1 | 1 AC090559.2    | --     |
| ENSG00000265911 | 5.13E-15 | -2.63127 | 1 | 1 AC117422.1    | --     |
| ENSG00000265916 | 5.13E-15 | -2.63127 | 1 | 1 RP11-434D2.9  | --     |
| ENSG00000265918 | 5.13E-15 | -2.63127 | 1 | 1 RN7SL543P     | --     |
| ENSG00000265919 | 5.13E-15 | -2.63127 | 1 | 1 MIR4280       | --     |
| ENSG00000265924 | 5.13E-15 | -2.63127 | 1 | 1 MIR5692C1     | --     |
| ENSG00000265927 | 5.13E-15 | -2.63127 | 1 | 1 CTD-2532D12.5 | --     |
| ENSG00000265929 | 5.13E-15 | -2.63127 | 1 | 1 hsa-mir-5195  | --     |
| ENSG00000265930 | 5.13E-15 | -2.63127 | 1 | 1 MIR4734       | --     |
| ENSG00000265931 | 5.13E-15 | -2.63127 | 1 | 1 AC112719.1    | --     |
| ENSG00000265934 | 5.13E-15 | -2.63127 | 1 | 1 ARL2BPP1      | K16742 |

|                 |          |          |   |                 |        |
|-----------------|----------|----------|---|-----------------|--------|
| ENSG00000265935 | 5.13E-15 | -2.63127 | 1 | 1 RP11-277J6.3  | -      |
| ENSG00000265936 | 5.13E-15 | -2.63127 | 1 | 1 RP11-563H6.1  | K02865 |
| ENSG00000265940 | 5.13E-15 | -2.63127 | 1 | 1 AC103974.1    | -      |
| ENSG00000265942 | 5.13E-15 | -2.63127 | 1 | 1 RN7SL577P     | -      |
| ENSG00000265945 | 5.13E-15 | -2.63127 | 1 | 1 RN7SL721P     | -      |
| ENSG00000265946 | 5.13E-15 | -2.63127 | 1 | 1 RP11-752P2.2  | K15409 |
| ENSG00000265953 | 5.13E-15 | -2.63127 | 1 | 1 AC092463.1    | -      |
| ENSG00000265954 | 5.13E-15 | -2.63127 | 1 | 1 MIR4749       | -      |
| ENSG00000265956 | 5.13E-15 | -2.63127 | 1 | 1 MIR4445       | -      |
| ENSG00000265957 | 5.13E-15 | -2.63127 | 1 | 1 MIR4319       | -      |
| ENSG00000265959 | 5.13E-15 | -2.63127 | 1 | 1 AL354720.1    | -      |
| ENSG00000265960 | 5.13E-15 | -2.63127 | 1 | 1 AL365181.1    | -      |
| ENSG00000265964 | 5.13E-15 | -2.63127 | 1 | 1 RP11-293E1.1  | -      |
| ENSG00000265965 | 5.13E-15 | -2.63127 | 1 | 1 MIR4266       | -      |
| ENSG00000265967 | 5.13E-15 | -2.63127 | 1 | 1 AC100830.4    | -      |
| ENSG00000265968 | 5.13E-15 | -2.63127 | 1 | 1 RN7SL103P     | -      |
| ENSG00000265971 | 5.13E-15 | -2.63127 | 1 | 1 RP11-269G24.6 | -      |
| ENSG00000265975 | 5.13E-15 | -2.63127 | 1 | 1 CTB-41I6.2    | -      |
| ENSG00000265976 | 5.13E-15 | -2.63127 | 1 | 1 MIR4725       | -      |
| ENSG00000265977 | 5.13E-15 | -2.63127 | 1 | 1 AL450307.2    | -      |
| ENSG00000265978 | 5.13E-15 | -2.63127 | 1 | 1 AL008721.1    | -      |
| ENSG00000265979 | 5.13E-15 | -2.63127 | 1 | 1 AC017028.9    | -      |
| ENSG00000265980 | 5.13E-15 | -2.63127 | 1 | 1 CTD-2515C13.2 | -      |
| ENSG00000265981 | 5.13E-15 | -2.63127 | 1 | 1 MIR544B       | -      |
| ENSG00000265985 | 5.13E-15 | -2.63127 | 1 | 1 AC005686.1    | -      |
| ENSG00000265986 | 5.13E-15 | -2.63127 | 1 | 1 MIR4735       | -      |
| ENSG00000265990 | 5.13E-15 | -2.63127 | 1 | 1 AL356154.1    | -      |
| ENSG00000265991 | 5.13E-15 | -2.63127 | 1 | 1 MIR4519       | -      |
| ENSG00000265992 | 5.13E-15 | -2.63127 | 1 | 1 ESRG          | -      |
| ENSG00000265993 | 5.13E-15 | -2.63127 | 1 | 1 MIR5694       | -      |
| ENSG00000265994 | 5.13E-15 | -2.63127 | 1 | 1 RP11-510D21.1 | -      |
| ENSG00000265995 | 5.13E-15 | -2.63127 | 1 | 1 RP11-736G13.1 | -      |
| ENSG00000265997 | 5.13E-15 | -2.63127 | 1 | 1 RN7SL852P     | -      |
| ENSG00000265999 | 5.13E-15 | -2.63127 | 1 | 1 AL499628.1    | -      |
| ENSG00000266000 | 5.13E-15 | -2.63127 | 1 | 1 AL731561.2    | -      |
| ENSG00000266001 | 5.13E-15 | -2.63127 | 1 | 1 AC018506.1    | -      |
| ENSG00000266002 | 5.13E-15 | -2.63127 | 1 | 1 RP11-567L7.5  | -      |
| ENSG00000266003 | 5.13E-15 | -2.63127 | 1 | 1 RP11-267C16.2 | -      |
| ENSG00000266005 | 5.13E-15 | -2.63127 | 1 | 1 RN7SL611P     | -      |
| ENSG00000266006 | 5.13E-15 | -2.63127 | 1 | 1 MIR4488       | -      |
| ENSG00000266007 | 5.13E-15 | -2.63127 | 1 | 1 AP000318.1    | -      |
| ENSG00000266008 | 5.13E-15 | -2.63127 | 1 | 1 AC092364.4    | -      |
| ENSG00000266009 | 5.13E-15 | -2.63127 | 1 | 1 RP11-746M1.2  | K05150 |
| ENSG00000266012 | 5.13E-15 | -2.63127 | 1 | 1 MIR4764       | -      |
| ENSG00000266013 | 5.13E-15 | -2.63127 | 1 | 1 CTD-2206N4.2  | -      |
| ENSG00000266014 | 5.13E-15 | -2.63127 | 1 | 1 RP11-94B19.2  | -      |
| ENSG00000266015 | 5.13E-15 | -2.63127 | 1 | 1 MIR4309       | -      |
| ENSG00000266016 | 5.13E-15 | -2.63127 | 1 | 1 AC009779.1    | -      |
| ENSG00000266018 | 5.13E-15 | -2.63127 | 1 | 1 AP000781.1    | -      |
| ENSG00000266019 | 5.13E-15 | -2.63127 | 1 | 1 MIR3609       | -      |
| ENSG00000266020 | 5.13E-15 | -2.63127 | 1 | 1 AC010092.1    | -      |
| ENSG00000266021 | 5.13E-15 | -2.63127 | 1 | 1 AL353763.2    | -      |
| ENSG00000266023 | 5.13E-15 | -2.63127 | 1 | 1 RN7SL770P     | -      |
| ENSG00000266024 | 5.13E-15 | -2.63127 | 1 | 1 AF250324.1    | -      |
| ENSG00000266025 | 5.13E-15 | -2.63127 | 1 | 1 AC132660.1    | -      |
| ENSG00000266026 | 5.13E-15 | -2.63127 | 1 | 1 AC092111.1    | -      |
| ENSG00000266029 | 5.13E-15 | -2.63127 | 1 | 1 AC007040.2    | -      |
| ENSG00000266030 | 5.13E-15 | -2.63127 | 1 | 1 AC078828.1    | -      |

|                 |          |          |   |                 |        |
|-----------------|----------|----------|---|-----------------|--------|
| ENSG00000266032 | 5.13E-15 | -2.63127 | 1 | 1 AL357515.1    | --     |
| ENSG00000266033 | 5.13E-15 | -2.63127 | 1 | 1 AL606519.1    | --     |
| ENSG00000266037 | 5.13E-15 | -2.63127 | 1 | 1 RN7SL3        | --     |
| ENSG00000266038 | 5.13E-15 | -2.63127 | 1 | 1 MIR4659B      | --     |
| ENSG00000266039 | 5.13E-15 | -2.63127 | 1 | 1 MIR4509-3     | --     |
| ENSG00000266041 | 5.13E-15 | -2.63127 | 1 | 1 MIR4690       | --     |
| ENSG00000266042 | 5.13E-15 | -2.63127 | 1 | 1 AC015818.6    | K06630 |
| ENSG00000266043 | 5.13E-15 | -2.63127 | 1 | 1 MIR3649       | --     |
| ENSG00000266044 | 5.13E-15 | -2.63127 | 1 | 1 MIR4469       | --     |
| ENSG00000266045 | 5.13E-15 | -2.63127 | 1 | 1 RP11-466P24.7 | --     |
| ENSG00000266046 | 5.13E-15 | -2.63127 | 1 | 1 AC084209.1    | --     |
| ENSG00000266048 | 5.13E-15 | -2.63127 | 1 | 1 CTD-2206N4.1  | --     |
| ENSG00000266049 | 5.13E-15 | -2.63127 | 1 | 1 RP11-703M24.5 | --     |
| ENSG00000266050 | 5.13E-15 | -2.63127 | 1 | 1 RP11-822E23.6 | --     |
| ENSG00000266051 | 5.13E-15 | -2.63127 | 1 | 1 AC023992.1    | --     |
| ENSG00000266052 | 5.13E-15 | -2.63127 | 1 | 1 MIR4500       | --     |
| ENSG00000266055 | 5.13E-15 | -2.63127 | 1 | 1 AC004079.1    | --     |
| ENSG00000266057 | 5.13E-15 | -2.63127 | 1 | 1 AL607076.1    | --     |
| ENSG00000266058 | 5.13E-15 | -2.63127 | 1 | 1 AC084010.1    | --     |
| ENSG00000266059 | 5.13E-15 | -2.63127 | 1 | 1 RN7SL140P     | --     |
| ENSG00000266060 | 5.13E-15 | -2.63127 | 1 | 1 AL603650.4    | --     |
| ENSG00000266061 | 5.13E-15 | -2.63127 | 1 | 1 AL355531.1    | --     |
| ENSG00000266065 | 5.13E-15 | -2.63127 | 1 | 1 CTD-2124B20.2 | --     |
| ENSG00000266069 | 5.13E-15 | -2.63127 | 1 | 1 AL139821.1    | --     |
| ENSG00000266070 | 5.13E-15 | -2.63127 | 1 | 1 MIR3960       | --     |
| ENSG00000266071 | 5.13E-15 | -2.63127 | 1 | 1 MIR3617       | --     |
| ENSG00000266072 | 5.13E-15 | -2.63127 | 1 | 1 MIR5693       | --     |
| ENSG00000266073 | 5.13E-15 | -2.63127 | 1 | 1 AL590874.1    | --     |
| ENSG00000266076 | 5.13E-15 | -2.63127 | 1 | 1 CTD-2535L24.2 | K04385 |
| ENSG00000266077 | 5.13E-15 | -2.63127 | 1 | 1 AC139149.1    | --     |
| ENSG00000266078 | 5.13E-15 | -2.63127 | 1 | 1 MIR4432       | --     |
| ENSG00000266079 | 5.13E-15 | -2.63127 | 1 | 1 SNORA59B      | --     |
| ENSG00000266082 | 5.13E-15 | -2.63127 | 1 | 1 AL138925.1    | --     |
| ENSG00000266083 | 5.13E-15 | -2.63127 | 1 | 1 AC138965.1    | --     |
| ENSG00000266085 | 5.13E-15 | -2.63127 | 1 | 1 AL109658.1    | --     |
| ENSG00000266086 | 5.13E-15 | -2.63127 | 1 | 1 RP11-159D12.5 | K12890 |
| ENSG00000266087 | 5.13E-15 | -2.63127 | 1 | 1 RN7SL462P     | --     |
| ENSG00000266089 | 5.13E-15 | -2.63127 | 1 | 1 RN7SL562P     | --     |
| ENSG00000266090 | 5.13E-15 | -2.63127 | 1 | 1 AC012603.1    | --     |
| ENSG00000266096 | 5.13E-15 | -2.63127 | 1 | 1 AC011652.2    | --     |
| ENSG00000266099 | 5.13E-15 | -2.63127 | 1 | 1 MIR5700       | --     |
| ENSG00000266100 | 5.13E-15 | -2.63127 | 1 | 1 RP11-118E18.2 | --     |
| ENSG00000266101 | 5.13E-15 | -2.63127 | 1 | 1 RP5-906A24.2  | --     |
| ENSG00000266102 | 5.13E-15 | -2.63127 | 1 | 1 RP11-243E13.2 | --     |
| ENSG00000266103 | 5.13E-15 | -2.63127 | 1 | 1 RN7SL458P     | --     |
| ENSG00000266104 | 5.13E-15 | -2.63127 | 1 | 1 MIR4326       | --     |
| ENSG00000266105 | 5.13E-15 | -2.63127 | 1 | 1 RP11-326K13.2 | K12471 |
| ENSG00000266106 | 5.13E-15 | -2.63127 | 1 | 1 RP11-647F2.2  | --     |
| ENSG00000266107 | 5.13E-15 | -2.63127 | 1 | 1 MIR4525       | --     |
| ENSG00000266108 | 5.13E-15 | -2.63127 | 1 | 1 AC152005.1    | --     |
| ENSG00000266109 | 5.13E-15 | -2.63127 | 1 | 1 MIR4440       | --     |
| ENSG00000266110 | 5.13E-15 | -2.63127 | 1 | 1 MIR4423       | --     |
| ENSG00000266112 | 5.13E-15 | -2.63127 | 1 | 1 AC007567.1    | --     |
| ENSG00000266114 | 5.13E-15 | -2.63127 | 1 | 1 RP11-963H4.5  | --     |
| ENSG00000266115 | 5.13E-15 | -2.63127 | 1 | 1 AC005375.1    | --     |
| ENSG00000266117 | 5.13E-15 | -2.63127 | 1 | 1 LOC732538     | K10312 |
| ENSG00000266118 | 5.13E-15 | -2.63127 | 1 | 1 RP11-507M3.1  | K17985 |
| ENSG00000266120 | 5.13E-15 | -2.63127 | 1 | 1 RP11-354P11.2 | --     |

|                 |          |          |   |                   |        |
|-----------------|----------|----------|---|-------------------|--------|
| ENSG00000266121 | 5.13E-15 | -2.63127 | 1 | 1 AC092104.4      | --     |
| ENSG00000266122 | 5.13E-15 | -2.63127 | 1 | 1 RN7SL373P       | --     |
| ENSG00000266123 | 5.13E-15 | -2.63127 | 1 | 1 RN7SL114P       | --     |
| ENSG00000266125 | 5.13E-15 | -2.63127 | 1 | 1 AL022400.1      | --     |
| ENSG00000266128 | 5.13E-15 | -2.63127 | 1 | 1 RN7SL366P       | --     |
| ENSG00000266129 | 5.13E-15 | -2.63127 | 1 | 1 SRP68P1         | K03107 |
| ENSG00000266133 | 5.13E-15 | -2.63127 | 1 | 1 MIR4759         | --     |
| ENSG00000266135 | 5.13E-15 | -2.63127 | 1 | 1 RN7SL625P       | --     |
| ENSG00000266136 | 5.13E-15 | -2.63127 | 1 | 1 AL031055.1      | --     |
| ENSG00000266138 | 5.13E-15 | -2.63127 | 1 | 1 RN7SL501P       | --     |
| ENSG00000266139 | 5.13E-15 | -2.63127 | 1 | 1 MIR4435-2       | --     |
| ENSG00000266140 | 5.13E-15 | -2.63127 | 1 | 1 MIR4533         | --     |
| ENSG00000266141 | 5.13E-15 | -2.63127 | 1 | 1 MIR2909         | --     |
| ENSG00000266143 | 5.13E-15 | -2.63127 | 1 | 1 AC066612.1      | --     |
| ENSG00000266144 | 5.13E-15 | -2.63127 | 1 | 1 MIR4654         | --     |
| ENSG00000266146 | 5.13E-15 | -2.63127 | 1 | 1 MIR5190         | --     |
| ENSG00000266148 | 5.13E-15 | -2.63127 | 1 | 1 MIR5583-1       | --     |
| ENSG00000266149 | 5.13E-15 | -2.63127 | 1 | 1 RP11-789C17.3   | --     |
| ENSG00000266150 | 5.13E-15 | -2.63127 | 1 | 1 MIR4711         | --     |
| ENSG00000266151 | 5.13E-15 | -2.63127 | 1 | 1 MIR3646         | --     |
| ENSG00000266152 | 5.13E-15 | -2.63127 | 1 | 1 RN7SL550P       | --     |
| ENSG00000266153 | 5.13E-15 | -2.63127 | 1 | 1 RP11-190I17.2   | --     |
| ENSG00000266154 | 5.13E-15 | -2.63127 | 1 | 1 MIR4658         | --     |
| ENSG00000266156 | 5.13E-15 | -2.63127 | 1 | 1 AC010329.1      | --     |
| ENSG00000266158 | 5.13E-15 | -2.63127 | 1 | 1 RN7SL785P       | --     |
| ENSG00000266160 | 5.13E-15 | -2.63127 | 1 | 1 RN7SL612P       | --     |
| ENSG00000266162 | 5.13E-15 | -2.63127 | 1 | 1 YWHAEP2         | K06630 |
| ENSG00000266163 | 5.13E-15 | -2.63127 | 1 | 1 AC007216.1      | --     |
| ENSG00000266166 | 5.13E-15 | -2.63127 | 1 | 1 RN7SL557P       | --     |
| ENSG00000266168 | 5.13E-15 | -2.63127 | 1 | 1 MIR3147         | --     |
| ENSG00000266171 | 5.13E-15 | -2.63127 | 1 | 1 RP11-769O8.1    | --     |
| ENSG00000266172 | 5.13E-15 | -2.63127 | 1 | 1 RP11-1109M24.11 | --     |
| ENSG00000266174 | 5.13E-15 | -2.63127 | 1 | 1 MIR4666A        | --     |
| ENSG00000266175 | 5.13E-15 | -2.63127 | 1 | 1 AL080243.1      | --     |
| ENSG00000266176 | 5.13E-15 | -2.63127 | 1 | 1 RP11-855A2.5    | --     |
| ENSG00000266179 | 5.13E-15 | -2.63127 | 1 | 1 RP11-1113L8.6   | K01982 |
| ENSG00000266180 | 5.13E-15 | -2.63127 | 1 | 1 MIR4282         | --     |
| ENSG00000266181 | 5.13E-15 | -2.63127 | 1 | 1 RP11-178F10.4   | K13025 |
| ENSG00000266183 | 5.13E-15 | -2.63127 | 1 | 1 AL662800.2      | --     |
| ENSG00000266184 | 5.13E-15 | -2.63127 | 1 | 1 RP11-552O4.2    | K14016 |
| ENSG00000266185 | 5.13E-15 | -2.63127 | 1 | 1 RN7SL804P       | --     |
| ENSG00000266186 | 5.13E-15 | -2.63127 | 1 | 1 AC007040.3      | --     |
| ENSG00000266187 | 5.13E-15 | -2.63127 | 1 | 1 RN7SL480P       | --     |
| ENSG00000266188 | 5.13E-15 | -2.63127 | 1 | 1 MIR5095         | --     |
| ENSG00000266189 | 5.13E-15 | -2.63127 | 1 | 1 MIR3186         | --     |
| ENSG00000266190 | 5.13E-15 | -2.63127 | 1 | 1 RP11-218F4.2    | K02866 |
| ENSG00000266192 | 5.13E-15 | -2.63127 | 1 | 1 MIR1260B        | --     |
| ENSG00000266193 | 5.13E-15 | -2.63127 | 1 | 1 MIR4468         | --     |
| ENSG00000266194 | 5.13E-15 | -2.63127 | 1 | 1 MIR4661         | --     |
| ENSG00000266195 | 5.13E-15 | -2.63127 | 1 | 1 RN7SL163P       | --     |
| ENSG00000266196 | 5.13E-15 | -2.63127 | 1 | 1 RP11-675P14.1   | --     |
| ENSG00000266197 | 5.13E-15 | -2.63127 | 1 | 1 RN7SL527P       | --     |
| ENSG00000266199 | 5.13E-15 | -2.63127 | 1 | 1 RN7SL514P       | --     |
| ENSG00000266201 | 5.13E-15 | -2.63127 | 1 | 1 SS18L2P2        | --     |
| ENSG00000266202 | 5.13E-15 | -2.63127 | 1 | 1 RP1-66C13.4     | --     |
| ENSG00000266203 | 5.13E-15 | -2.63127 | 1 | 1 MIR5585         | --     |
| ENSG00000266204 | 5.13E-15 | -2.63127 | 1 | 1 MIR5589         | --     |
| ENSG00000266205 | 5.13E-15 | -2.63127 | 1 | 1 AC025678.1      | --     |



|                 |          |          |   |                  |        |
|-----------------|----------|----------|---|------------------|--------|
| ENSG00000266206 | 5.13E-15 | -2.63127 | 1 | 1 MIR3926-2      | --     |
| ENSG00000266207 | 5.13E-15 | -2.63127 | 1 | 1 AL583784.1     | --     |
| ENSG00000266209 | 5.13E-15 | -2.63127 | 1 | 1 AC005783.1     | --     |
| ENSG00000266210 | 5.13E-15 | -2.63127 | 1 | 1 RN7SL371P      | --     |
| ENSG00000266211 | 5.13E-15 | -2.63127 | 1 | 1 MIR3156-3      | --     |
| ENSG00000266213 | 5.13E-15 | -2.63127 | 1 | 1 RP11-100K18.1  | --     |
| ENSG00000266215 | 5.13E-15 | -2.63127 | 1 | 1 MIR3167        | --     |
| ENSG00000266216 | 5.13E-15 | -2.63127 | 1 | 1 AL359538.2     | --     |
| ENSG00000266218 | 5.13E-15 | -2.63127 | 1 | 1 AC092865.2     | --     |
| ENSG00000266220 | 5.13E-15 | -2.63127 | 1 | 1 AC010723.2     | --     |
| ENSG00000266222 | 5.13E-15 | -2.63127 | 1 | 1 RP11-433M22.1  | --     |
| ENSG00000266223 | 5.13E-15 | -2.63127 | 1 | 1 RN7SL84P       | --     |
| ENSG00000266224 | 5.13E-15 | -2.63127 | 1 | 1 AL158077.1     | --     |
| ENSG00000266226 | 5.13E-15 | -2.63127 | 1 | 1 MIR4323        | --     |
| ENSG00000266227 | 5.13E-15 | -2.63127 | 1 | 1 NPM1P2         | K11276 |
| ENSG00000266228 | 5.13E-15 | -2.63127 | 1 | 1 MIR3611        | --     |
| ENSG00000266229 | 5.13E-15 | -2.63127 | 1 | 1 AC020606.1     | --     |
| ENSG00000266230 | 5.13E-15 | -2.63127 | 1 | 1 AL591925.1     | --     |
| ENSG00000266233 | 5.13E-15 | -2.63127 | 1 | 1 AC021660.1     | --     |
| ENSG00000266237 | 5.13E-15 | -2.63127 | 1 | 1 RP11-25D3.1    | --     |
| ENSG00000266239 | 5.13E-15 | -2.63127 | 1 | 1 MIR3605        | --     |
| ENSG00000266240 | 5.13E-15 | -2.63127 | 1 | 1 MIR5091        | --     |
| ENSG00000266241 | 5.13E-15 | -2.63127 | 1 | 1 MIR5047        | --     |
| ENSG00000266242 | 5.13E-15 | -2.63127 | 1 | 1 GRAMD4P7       | --     |
| ENSG00000266243 | 5.13E-15 | -2.63127 | 1 | 1 MIR4279        | --     |
| ENSG00000266244 | 5.13E-15 | -2.63127 | 1 | 1 AC079340.1     | --     |
| ENSG00000266245 | 5.13E-15 | -2.63127 | 1 | 1 MIR4644        | --     |
| ENSG00000266246 | 5.13E-15 | -2.63127 | 1 | 1 AC116655.1     | --     |
| ENSG00000266247 | 5.13E-15 | -2.63127 | 1 | 1 AC008752.3     | --     |
| ENSG00000266248 | 5.13E-15 | -2.63127 | 1 | 1 CTC-525D6.2    | --     |
| ENSG00000266251 | 5.13E-15 | -2.63127 | 1 | 1 COX6CP3        | K02268 |
| ENSG00000266252 | 5.13E-15 | -2.63127 | 1 | 1 AL031768.1     | --     |
| ENSG00000266254 | 5.13E-15 | -2.63127 | 1 | 1 AC093874.1     | --     |
| ENSG00000266255 | 5.13E-15 | -2.63127 | 1 | 1 MIR4475        | --     |
| ENSG00000266256 | 5.13E-15 | -2.63127 | 1 | 1 LINC00683      | --     |
| ENSG00000266257 | 5.13E-15 | -2.63127 | 1 | 1 AC005926.1     | --     |
| ENSG00000266259 | 5.13E-15 | -2.63127 | 1 | 1 AC012003.1     | --     |
| ENSG00000266262 | 5.13E-15 | -2.63127 | 1 | 1 MIR4428        | --     |
| ENSG00000266264 | 5.13E-15 | -2.63127 | 1 | 1 AL162311.1     | --     |
| ENSG00000266268 | 5.13E-15 | -2.63127 | 1 | 1 RP11-172F10.1  | --     |
| ENSG00000266269 | 5.13E-15 | -2.63127 | 1 | 1 AC002395.1     | --     |
| ENSG00000266270 | 5.13E-15 | -2.63127 | 1 | 1 MIR5096        | --     |
| ENSG00000266272 | 5.13E-15 | -2.63127 | 1 | 1 Z97632.1       | --     |
| ENSG00000266273 | 5.13E-15 | -2.63127 | 1 | 1 RP11-715C4.1   | --     |
| ENSG00000266274 | 5.13E-15 | -2.63127 | 1 | 1 RN7SL138P      | --     |
| ENSG00000266275 | 5.13E-15 | -2.63127 | 1 | 1 AC034187.5     | --     |
| ENSG00000266276 | 5.13E-15 | -2.63127 | 1 | 1 MIR4743        | --     |
| ENSG00000266277 | 5.13E-15 | -2.63127 | 1 | 1 AC096763.1     | --     |
| ENSG00000266279 | 5.13E-15 | -2.63127 | 1 | 1 RP11-849F2.4   | --     |
| ENSG00000266281 | 5.13E-15 | -2.63127 | 1 | 1 AL356865.2     | --     |
| ENSG00000266282 | 5.13E-15 | -2.63127 | 1 | 1 UBL5P2         | K13113 |
| ENSG00000266285 | 5.13E-15 | -2.63127 | 1 | 1 RN7SL682P      | --     |
| ENSG00000266287 | 5.13E-15 | -2.63127 | 1 | 1 MIR3683        | --     |
| ENSG00000266288 | 5.13E-15 | -2.63127 | 1 | 1 CTD-3096M3.2   | --     |
| ENSG00000266290 | 5.13E-15 | -2.63127 | 1 | 1 RP11-159D12.10 | --     |
| ENSG00000266291 | 5.13E-15 | -2.63127 | 1 | 1 hsa-mir-3180-3 | --     |
| ENSG00000266293 | 5.13E-15 | -2.63127 | 1 | 1 AC069276.1     | --     |
| ENSG00000266294 | 5.13E-15 | -2.63127 | 1 | 1 AL136380.1     | --     |

|                 |          |          |   |                  |        |
|-----------------|----------|----------|---|------------------|--------|
| ENSG00000266297 | 5.13E-15 | -2.63127 | 1 | 1 MIR744         | --     |
| ENSG00000266299 | 5.13E-15 | -2.63127 | 1 | 1 MIR3118-5      | --     |
| ENSG00000266302 | 5.13E-15 | -2.63127 | 1 | 1 RP11-219A15.1  | K11837 |
| ENSG00000266305 | 5.13E-15 | -2.63127 | 1 | 1 MIR4518        | --     |
| ENSG00000266307 | 5.13E-15 | -2.63127 | 1 | 1 MIR5093        | --     |
| ENSG00000266308 | 5.13E-15 | -2.63127 | 1 | 1 RN7SL510P      | --     |
| ENSG00000266309 | 5.13E-15 | -2.63127 | 1 | 1 AC012671.4     | --     |
| ENSG00000266310 | 5.13E-15 | -2.63127 | 1 | 1 AC106899.1     | --     |
| ENSG00000266312 | 5.13E-15 | -2.63127 | 1 | 1 RP11-111H3.3   | --     |
| ENSG00000266317 | 5.13E-15 | -2.63127 | 1 | 1 RN7SL703P      | --     |
| ENSG00000266318 | 5.13E-15 | -2.63127 | 1 | 1 MIR5692A2      | --     |
| ENSG00000266319 | 5.13E-15 | -2.63127 | 1 | 1 AL080272.1     | --     |
| ENSG00000266320 | 5.13E-15 | -2.63127 | 1 | 1 MIR3909        | --     |
| ENSG00000266321 | 5.13E-15 | -2.63127 | 1 | 1 MIR4293        | --     |
| ENSG00000266323 | 5.13E-15 | -2.63127 | 1 | 1 RN7SL733P      | --     |
| ENSG00000266324 | 5.13E-15 | -2.63127 | 1 | 1 MIR4663        | --     |
| ENSG00000266325 | 5.13E-15 | -2.63127 | 1 | 1 MIR3665        | --     |
| ENSG00000266327 | 5.13E-15 | -2.63127 | 1 | 1 MIR4503        | --     |
| ENSG00000266328 | 5.13E-15 | -2.63127 | 1 | 1 hsa-mir-4536-2 | --     |
| ENSG00000266329 | 5.13E-15 | -2.63127 | 1 | 1 MIR4281        | --     |
| ENSG00000266330 | 5.13E-15 | -2.63127 | 1 | 1 AL355353.1     | --     |
| ENSG00000266333 | 5.13E-15 | -2.63127 | 1 | 1 AC117372.1     | --     |
| ENSG00000266335 | 5.13E-15 | -2.63127 | 1 | 1 RP11-25O3.1    | --     |
| ENSG00000266336 | 5.13E-15 | -2.63127 | 1 | 1 AL356019.1     | --     |
| ENSG00000266337 | 5.13E-15 | -2.63127 | 1 | 1 AC118282.4     | --     |
| ENSG00000266339 | 5.13E-15 | -2.63127 | 1 | 1 RN7SL17P       | --     |
| ENSG00000266341 | 5.13E-15 | -2.63127 | 1 | 1 RP5-890E16.4   | --     |
| ENSG00000266343 | 5.13E-15 | -2.63127 | 1 | 1 RN7SL506P      | --     |
| ENSG00000266344 | 5.13E-15 | -2.63127 | 1 | 1 AL353731.1     | --     |
| ENSG00000266345 | 5.13E-15 | -2.63127 | 1 | 1 RN7SL349P      | --     |
| ENSG00000266346 | 5.13E-15 | -2.63127 | 1 | 1 AC019205.2     | --     |
| ENSG00000266349 | 5.13E-15 | -2.63127 | 1 | 1 AC018618.1     | --     |
| ENSG00000266352 | 5.13E-15 | -2.63127 | 1 | 1 RN7SL192P      | --     |
| ENSG00000266353 | 5.13E-15 | -2.63127 | 1 | 1 AL591471.1     | --     |
| ENSG00000266354 | 5.13E-15 | -2.63127 | 1 | 1 MIR4776-2      | --     |
| ENSG00000266355 | 5.13E-15 | -2.63127 | 1 | 1 AL117334.1     | --     |
| ENSG00000266356 | 5.13E-15 | -2.63127 | 1 | 1 RP11-578C11.2  | K06630 |
| ENSG00000266357 | 5.13E-15 | -2.63127 | 1 | 1 RP11-101O21.1  | --     |
| ENSG00000266358 | 5.13E-15 | -2.63127 | 1 | 1 AL359771.1     | --     |
| ENSG00000266360 | 5.13E-15 | -2.63127 | 1 | 1 AC017028.10    | --     |
| ENSG00000266363 | 5.13E-15 | -2.63127 | 1 | 1 AC069243.1     | --     |
| ENSG00000266364 | 5.13E-15 | -2.63127 | 1 | 1 RP11-218E15.1  | --     |
| ENSG00000266365 | 5.13E-15 | -2.63127 | 1 | 1 RP11-51L5.3    | K04688 |
| ENSG00000266366 | 5.13E-15 | -2.63127 | 1 | 1 RN7SL389P      | --     |
| ENSG00000266368 | 5.13E-15 | -2.63127 | 1 | 1 RP11-1096G20.5 | --     |
| ENSG00000266369 | 5.13E-15 | -2.63127 | 1 | 1 RP11-344E13.4  | --     |
| ENSG00000266370 | 5.13E-15 | -2.63127 | 1 | 1 MIR3657        | --     |
| ENSG00000266371 | 5.13E-15 | -2.63127 | 1 | 1 RP11-142O6.1   | --     |
| ENSG00000266372 | 5.13E-15 | -2.63127 | 1 | 1 AC092849.1     | --     |
| ENSG00000266373 | 5.13E-15 | -2.63127 | 1 | 1 RP11-710M11.1  | K19325 |
| ENSG00000266374 | 5.13E-15 | -2.63127 | 1 | 1 AC026512.1     | --     |
| ENSG00000266376 | 5.13E-15 | -2.63127 | 1 | 1 AC093165.1     | --     |
| ENSG00000266377 | 5.13E-15 | -2.63127 | 1 | 1 AC095064.1     | --     |
| ENSG00000266378 | 5.13E-15 | -2.63127 | 1 | 1 RP11-214O1.3   | --     |
| ENSG00000266379 | 5.13E-15 | -2.63127 | 1 | 1 RP11-640N20.8  | --     |
| ENSG00000266382 | 5.13E-15 | -2.63127 | 1 | 1 MIR5703        | --     |
| ENSG00000266383 | 5.13E-15 | -2.63127 | 1 | 1 MIR5002        | --     |
| ENSG00000266387 | 5.13E-15 | -2.63127 | 1 | 1 AC016178.2     | --     |

|                 |          |          |   |                 |        |
|-----------------|----------|----------|---|-----------------|--------|
| ENSG00000266388 | 5.13E-15 | -2.63127 | 1 | 1 AC093430.1    | --     |
| ENSG00000266389 | 5.13E-15 | -2.63127 | 1 | 1 CTB-41I6.1    | --     |
| ENSG00000266390 | 5.13E-15 | -2.63127 | 1 | 1 AC027288.2    | --     |
| ENSG00000266391 | 5.13E-15 | -2.63127 | 1 | 1 AC074389.1    | --     |
| ENSG00000266392 | 5.13E-15 | -2.63127 | 1 | 1 MIR4740       | --     |
| ENSG00000266393 | 5.13E-15 | -2.63127 | 1 | 1 AL122019.1    | --     |
| ENSG00000266396 | 5.13E-15 | -2.63127 | 1 | 1 MIR4273       | --     |
| ENSG00000266398 | 5.13E-15 | -2.63127 | 1 | 1 MIR3656       | --     |
| ENSG00000266399 | 5.13E-15 | -2.63127 | 1 | 1 AC027307.2    | --     |
| ENSG00000266400 | 5.13E-15 | -2.63127 | 1 | 1 AC113171.1    | --     |
| ENSG00000266403 | 5.13E-15 | -2.63127 | 1 | 1 AL161731.1    | --     |
| ENSG00000266407 | 5.13E-15 | -2.63127 | 1 | 1 MIR3157       | --     |
| ENSG00000266408 | 5.13E-15 | -2.63127 | 1 | 1 AL122127.4    | --     |
| ENSG00000266409 | 5.13E-15 | -2.63127 | 1 | 1 AC092104.5    | --     |
| ENSG00000266413 | 5.13E-15 | -2.63127 | 1 | 1 RP11-88L24.4  | --     |
| ENSG00000266415 | 5.13E-15 | -2.63127 | 1 | 1 MIR4636       | --     |
| ENSG00000266416 | 5.13E-15 | -2.63127 | 1 | 1 RP1-66C13.2   | --     |
| ENSG00000266417 | 5.13E-15 | -2.63127 | 1 | 1 MIR4424       | --     |
| ENSG00000266420 | 5.13E-15 | -2.63127 | 1 | 1 RN7SL118P     | --     |
| ENSG00000266421 | 5.13E-15 | -2.63127 | 1 | 1 MIR4451       | --     |
| ENSG00000266425 | 5.13E-15 | -2.63127 | 1 | 1 RN7SL343P     | --     |
| ENSG00000266426 | 5.13E-15 | -2.63127 | 1 | 1 MIR4719       | --     |
| ENSG00000266427 | 5.13E-15 | -2.63127 | 1 | 1 AC098784.2    | --     |
| ENSG00000266429 | 5.13E-15 | -2.63127 | 1 | 1 AL442639.1    | --     |
| ENSG00000266430 | 5.13E-15 | -2.63127 | 1 | 1 AC004520.1    | --     |
| ENSG00000266431 | 5.13E-15 | -2.63127 | 1 | 1 MIR5580       | --     |
| ENSG00000266432 | 5.13E-15 | -2.63127 | 1 | 1 AC008703.2    | --     |
| ENSG00000266433 | 5.13E-15 | -2.63127 | 1 | 1 TBC1D3P5      | K11837 |
| ENSG00000266436 | 5.13E-15 | -2.63127 | 1 | 1 MIR4264       | --     |
| ENSG00000266437 | 5.13E-15 | -2.63127 | 1 | 1 MIR4746       | --     |
| ENSG00000266439 | 5.13E-15 | -2.63127 | 1 | 1 RN7SL493P     | --     |
| ENSG00000266440 | 5.13E-15 | -2.63127 | 1 | 1 AL359542.1    | --     |
| ENSG00000266443 | 5.13E-15 | -2.63127 | 1 | 1 AC099778.1    | --     |
| ENSG00000266447 | 5.13E-15 | -2.63127 | 1 | 1 AC046143.2    | --     |
| ENSG00000266448 | 5.13E-15 | -2.63127 | 1 | 1 RP11-805L22.1 | --     |
| ENSG00000266449 | 5.13E-15 | -2.63127 | 1 | 1 MIR3713       | --     |
| ENSG00000266450 | 5.13E-15 | -2.63127 | 1 | 1 CTD-2015H3.2  | --     |
| ENSG00000266451 | 5.13E-15 | -2.63127 | 1 | 1 AP003385.1    | --     |
| ENSG00000266452 | 5.13E-15 | -2.63127 | 1 | 1 RN7SL590P     | --     |
| ENSG00000266453 | 5.13E-15 | -2.63127 | 1 | 1 RN7SL142P     | --     |
| ENSG00000266454 | 5.13E-15 | -2.63127 | 1 | 1 MIR3179-3     | --     |
| ENSG00000266455 | 5.13E-15 | -2.63127 | 1 | 1 RN7SL765P     | --     |
| ENSG00000266457 | 5.13E-15 | -2.63127 | 1 | 1 AC026318.1    | --     |
| ENSG00000266458 | 5.13E-15 | -2.63127 | 1 | 1 hsa-mir-4259  | --     |
| ENSG00000266459 | 5.13E-15 | -2.63127 | 1 | 1 MIR4724       | --     |
| ENSG00000266460 | 5.13E-15 | -2.63127 | 1 | 1 RP11-173L6.1  | --     |
| ENSG00000266461 | 5.13E-15 | -2.63127 | 1 | 1 MIR2392       | --     |
| ENSG00000266462 | 5.13E-15 | -2.63127 | 1 | 1 AC010327.1    | --     |
| ENSG00000266463 | 5.13E-15 | -2.63127 | 1 | 1 MIR3196       | --     |
| ENSG00000266466 | 5.13E-15 | -2.63127 | 1 | 1 RP11-822E23.2 | --     |
| ENSG00000266468 | 5.13E-15 | -2.63127 | 1 | 1 AL031284.1    | --     |
| ENSG00000266470 | 5.13E-15 | -2.63127 | 1 | 1 RP11-856M7.8  | --     |
| ENSG00000266475 | 5.13E-15 | -2.63127 | 1 | 1 AC106753.1    | --     |
| ENSG00000266476 | 5.13E-15 | -2.63127 | 1 | 1 AC084262.3    | --     |
| ENSG00000266477 | 5.13E-15 | -2.63127 | 1 | 1 RN7SL616P     | --     |
| ENSG00000266478 | 5.13E-15 | -2.63127 | 1 | 1 MIR5197       | --     |
| ENSG00000266479 | 5.13E-15 | -2.63127 | 1 | 1 CTD-2515C13.1 | K04043 |
| ENSG00000266481 | 5.13E-15 | -2.63127 | 1 | 1 AC092174.1    | --     |

|                 |          |          |   |                  |        |
|-----------------|----------|----------|---|------------------|--------|
| ENSG00000266482 | 5.13E-15 | -2.63127 | 1 | 1 AC023157.1     | --     |
| ENSG00000266483 | 5.13E-15 | -2.63127 | 1 | 1 AC010311.1     | --     |
| ENSG00000266485 | 5.13E-15 | -2.63127 | 1 | 1 AL365214.1     | --     |
| ENSG00000266486 | 5.13E-15 | -2.63127 | 1 | 1 FAM106CP       | --     |
| ENSG00000266487 | 5.13E-15 | -2.63127 | 1 | 1 RN7SL855P      | --     |
| ENSG00000266489 | 5.13E-15 | -2.63127 | 1 | 1 RP11-178F10.3  | --     |
| ENSG00000266491 | 5.13E-15 | -2.63127 | 1 | 1 AC109335.1     | --     |
| ENSG00000266492 | 5.13E-15 | -2.63127 | 1 | 1 AC092122.2     | --     |
| ENSG00000266493 | 5.13E-15 | -2.63127 | 1 | 1 AC116533.3     | --     |
| ENSG00000266496 | 5.13E-15 | -2.63127 | 1 | 1 AC131951.1     | --     |
| ENSG00000266497 | 5.13E-15 | -2.63127 | 1 | 1 RP11-995C19.2  | K10874 |
| ENSG00000266499 | 5.13E-15 | -2.63127 | 1 | 1 AC008536.1     | --     |
| ENSG00000266500 | 5.13E-15 | -2.63127 | 1 | 1 AL138498.1     | --     |
| ENSG00000266502 | 5.13E-15 | -2.63127 | 1 | 1 MIR5681A       | --     |
| ENSG00000266503 | 5.13E-15 | -2.63127 | 1 | 1 RN7SL162P      | --     |
| ENSG00000266504 | 5.13E-15 | -2.63127 | 1 | 1 RP11-798G7.4   | K10874 |
| ENSG00000266505 | 5.13E-15 | -2.63127 | 1 | 1 RP11-629E24.2  | --     |
| ENSG00000266508 | 5.13E-15 | -2.63127 | 1 | 1 MIR3201        | --     |
| ENSG00000266509 | 5.13E-15 | -2.63127 | 1 | 1 MIR3934        | --     |
| ENSG00000266510 | 5.13E-15 | -2.63127 | 1 | 1 AC007435.1     | --     |
| ENSG00000266511 | 5.13E-15 | -2.63127 | 1 | 1 AL590683.2     | --     |
| ENSG00000266512 | 5.13E-15 | -2.63127 | 1 | 1 AC008166.1     | --     |
| ENSG00000266513 | 5.13E-15 | -2.63127 | 1 | 1 RP11-874J12.3  | --     |
| ENSG00000266514 | 5.13E-15 | -2.63127 | 1 | 1 MIR3689F       | --     |
| ENSG00000266515 | 5.13E-15 | -2.63127 | 1 | 1 MIR4452        | --     |
| ENSG00000266517 | 5.13E-15 | -2.63127 | 1 | 1 MIR4715        | --     |
| ENSG00000266518 | 5.13E-15 | -2.63127 | 1 | 1 MIR4268        | --     |
| ENSG00000266520 | 5.13E-15 | -2.63127 | 1 | 1 RAC1P1         | K04392 |
| ENSG00000266522 | 5.13E-15 | -2.63127 | 1 | 1 RP11-805F19.4  | --     |
| ENSG00000266525 | 5.13E-15 | -2.63127 | 1 | 1 MIR4650-1      | --     |
| ENSG00000266526 | 5.13E-15 | -2.63127 | 1 | 1 AC090720.1     | --     |
| ENSG00000266527 | 5.13E-15 | -2.63127 | 1 | 1 RP11-138P22.1  | --     |
| ENSG00000266529 | 5.13E-15 | -2.63127 | 1 | 1 RP11-846F4.1   | K00412 |
| ENSG00000266530 | 5.13E-15 | -2.63127 | 1 | 1 MIR4318        | --     |
| ENSG00000266531 | 5.13E-15 | -2.63127 | 1 | 1 MIR4706        | --     |
| ENSG00000266532 | 5.13E-15 | -2.63127 | 1 | 1 RN7SL235P      | --     |
| ENSG00000266534 | 5.13E-15 | -2.63127 | 1 | 1 AL162571.1     | --     |
| ENSG00000266535 | 5.13E-15 | -2.63127 | 1 | 1 RP11-40A13.1   | --     |
| ENSG00000266536 | 5.13E-15 | -2.63127 | 1 | 1 RN7SL126P      | --     |
| ENSG00000266539 | 5.13E-15 | -2.63127 | 1 | 1 AC078889.1     | --     |
| ENSG00000266540 | 5.13E-15 | -2.63127 | 1 | 1 RN7SL772P      | --     |
| ENSG00000266543 | 5.13E-15 | -2.63127 | 1 | 1 AC027811.1     | --     |
| ENSG00000266544 | 5.13E-15 | -2.63127 | 1 | 1 RN7SL662P      | --     |
| ENSG00000266545 | 5.13E-15 | -2.63127 | 1 | 1 MIR5701-1      | --     |
| ENSG00000266546 | 5.13E-15 | -2.63127 | 1 | 1 AC137674.2     | --     |
| ENSG00000266547 | 5.13E-15 | -2.63127 | 1 | 1 AL161645.1     | --     |
| ENSG00000266549 | 5.13E-15 | -2.63127 | 1 | 1 RP11-526I8.2   | K02150 |
| ENSG00000266550 | 5.13E-15 | -2.63127 | 1 | 1 AP002958.1     | --     |
| ENSG00000266551 | 5.13E-15 | -2.63127 | 1 | 1 RN7SL857P      | --     |
| ENSG00000266552 | 5.13E-15 | -2.63127 | 1 | 1 AL356020.1     | --     |
| ENSG00000266553 | 5.13E-15 | -2.63127 | 1 | 1 RN7SL356P      | --     |
| ENSG00000266554 | 5.13E-15 | -2.63127 | 1 | 1 RP11-527H14.2  | --     |
| ENSG00000266555 | 5.13E-15 | -2.63127 | 1 | 1 MIR3145        | --     |
| ENSG00000266556 | 5.13E-15 | -2.63127 | 1 | 1 AL137251.1     | --     |
| ENSG00000266559 | 5.13E-15 | -2.63127 | 1 | 1 MIR4530        | --     |
| ENSG00000266560 | 5.13E-15 | -2.63127 | 1 | 1 RP11-1007I13.4 | --     |
| ENSG00000266561 | 5.13E-15 | -2.63127 | 1 | 1 CTD-2200P10.3  | --     |
| ENSG00000266563 | 5.13E-15 | -2.63127 | 1 | 1 RP11-64J19.1   | K03113 |

|                 |          |          |   |                 |        |
|-----------------|----------|----------|---|-----------------|--------|
| ENSG00000266564 | 5.13E-15 | -2.63127 | 1 | 1 MIR4418       | --     |
| ENSG00000266566 | 5.13E-15 | -2.63127 | 1 | 1 AC009994.2    | --     |
| ENSG00000266567 | 5.13E-15 | -2.63127 | 1 | 1 MIR3618       | --     |
| ENSG00000266568 | 5.13E-15 | -2.63127 | 1 | 1 AL049610.1    | --     |
| ENSG00000266569 | 5.13E-15 | -2.63127 | 1 | 1 RN7SL377P     | --     |
| ENSG00000266570 | 5.13E-15 | -2.63127 | 1 | 1 MIR5579       | --     |
| ENSG00000266575 | 5.13E-15 | -2.63127 | 1 | 1 RP11-672L10.4 | --     |
| ENSG00000266577 | 5.13E-15 | -2.63127 | 1 | 1 RN7SL830P     | --     |
| ENSG00000266579 | 5.13E-15 | -2.63127 | 1 | 1 RP1-71H19.2   | --     |
| ENSG00000266580 | 5.13E-15 | -2.63127 | 1 | 1 MIR4254       | --     |
| ENSG00000266581 | 5.13E-15 | -2.63127 | 1 | 1 MIR3166       | --     |
| ENSG00000266582 | 5.13E-15 | -2.63127 | 1 | 1 MIR4527       | --     |
| ENSG00000266583 | 5.13E-15 | -2.63127 | 1 | 1 MIR4478       | --     |
| ENSG00000266584 | 5.13E-15 | -2.63127 | 1 | 1 AL355149.1    | --     |
| ENSG00000266586 | 5.13E-15 | -2.63127 | 1 | 1 CTD-2382H12.2 | --     |
| ENSG00000266587 | 5.13E-15 | -2.63127 | 1 | 1 AC027320.1    | --     |
| ENSG00000266588 | 5.13E-15 | -2.63127 | 1 | 1 RP1-56K13.5   | --     |
| ENSG00000266589 | 5.13E-15 | -2.63127 | 1 | 1 MIR4512       | --     |
| ENSG00000266590 | 5.13E-15 | -2.63127 | 1 | 1 AC090692.1    | --     |
| ENSG00000266591 | 5.13E-15 | -2.63127 | 1 | 1 AC022537.1    | --     |
| ENSG00000266593 | 5.13E-15 | -2.63127 | 1 | 1 MIR4713       | --     |
| ENSG00000266595 | 5.13E-15 | -2.63127 | 1 | 1 AL133269.1    | --     |
| ENSG00000266597 | 5.13E-15 | -2.63127 | 1 | 1 AL928742.2    | --     |
| ENSG00000266598 | 5.13E-15 | -2.63127 | 1 | 1 RP11-583F2.5  | --     |
| ENSG00000266599 | 5.13E-15 | -2.63127 | 1 | 1 RP11-466A19.3 | --     |
| ENSG00000266604 | 5.13E-15 | -2.63127 | 1 | 1 RP11-856M7.6  | --     |
| ENSG00000266605 | 5.13E-15 | -2.63127 | 1 | 1 LONRF2P1      | --     |
| ENSG00000266606 | 5.13E-15 | -2.63127 | 1 | 1 AP001010.1    | --     |
| ENSG00000266608 | 5.13E-15 | -2.63127 | 1 | 1 AL445531.1    | --     |
| ENSG00000266609 | 5.13E-15 | -2.63127 | 1 | 1 AC078899.8    | --     |
| ENSG00000266610 | 5.13E-15 | -2.63127 | 1 | 1 RN7SL176P     | --     |
| ENSG00000266611 | 5.13E-15 | -2.63127 | 1 | 1 MIR4703       | --     |
| ENSG00000266613 | 5.13E-15 | -2.63127 | 1 | 1 RFWD2P1       | K10143 |
| ENSG00000266614 | 5.13E-15 | -2.63127 | 1 | 1 RP11-94B19.4  | --     |
| ENSG00000266616 | 5.13E-15 | -2.63127 | 1 | 1 AP003558.1    | --     |
| ENSG00000266617 | 5.13E-15 | -2.63127 | 1 | 1 MIR3692       | --     |
| ENSG00000266618 | 5.13E-15 | -2.63127 | 1 | 1 MIR4742       | --     |
| ENSG00000266619 | 5.13E-15 | -2.63127 | 1 | 1 MIR4642       | --     |
| ENSG00000266620 | 5.13E-15 | -2.63127 | 1 | 1 MIR5001       | --     |
| ENSG00000266621 | 5.13E-15 | -2.63127 | 1 | 1 AC104841.1    | --     |
| ENSG00000266625 | 5.13E-15 | -2.63127 | 1 | 1 AC084859.1    | --     |
| ENSG00000266627 | 5.13E-15 | -2.63127 | 1 | 1 RN7SL202P     | --     |
| ENSG00000266628 | 5.13E-15 | -2.63127 | 1 | 1 RN7SL137P     | --     |
| ENSG00000266630 | 5.13E-15 | -2.63127 | 1 | 1 AC022716.1    | --     |
| ENSG00000266631 | 5.13E-15 | -2.63127 | 1 | 1 AC006116.1    | --     |
| ENSG00000266632 | 5.13E-15 | -2.63127 | 1 | 1 MIR4726       | --     |
| ENSG00000266633 | 5.13E-15 | -2.63127 | 1 | 1 AC006432.1    | --     |
| ENSG00000266634 | 5.13E-15 | -2.63127 | 1 | 1 MIR3972       | --     |
| ENSG00000266635 | 5.13E-15 | -2.63127 | 1 | 1 AC096887.1    | --     |
| ENSG00000266636 | 5.13E-15 | -2.63127 | 1 | 1 AC090340.1    | --     |
| ENSG00000266637 | 5.13E-15 | -2.63127 | 1 | 1 AC145124.1    | --     |
| ENSG00000266638 | 5.13E-15 | -2.63127 | 1 | 1 AC129492.1    | --     |
| ENSG00000266640 | 5.13E-15 | -2.63127 | 1 | 1 MIR4754       | --     |
| ENSG00000266645 | 5.13E-15 | -2.63127 | 1 | 1 MIR4299       | --     |
| ENSG00000266647 | 5.13E-15 | -2.63127 | 1 | 1 RP11-51L5.4   | K13241 |
| ENSG00000266648 | 5.13E-15 | -2.63127 | 1 | 1 RP11-112H10.6 | K11290 |
| ENSG00000266650 | 5.13E-15 | -2.63127 | 1 | 1 AL357519.2    | --     |
| ENSG00000266652 | 5.13E-15 | -2.63127 | 1 | 1 AC107025.1    | --     |

|                 |          |          |   |                   |        |
|-----------------|----------|----------|---|-------------------|--------|
| ENSG00000266655 | 5.13E-15 | -2.63127 | 1 | 1 MIR3908         | --     |
| ENSG00000266656 | 5.13E-15 | -2.63127 | 1 | 1 AC104066.1      | --     |
| ENSG00000266663 | 5.13E-15 | -2.63127 | 1 | 1 MIR3169         | --     |
| ENSG00000266664 | 5.13E-15 | -2.63127 | 1 | 1 RP11-160E2.21   | --     |
| ENSG00000266665 | 5.13E-15 | -2.63127 | 1 | 1 MIR4739         | --     |
| ENSG00000266666 | 5.13E-15 | -2.63127 | 1 | 1 MIR4325         | --     |
| ENSG00000266667 | 5.13E-15 | -2.63127 | 1 | 1 RP11-849N15.4   | --     |
| ENSG00000266668 | 5.13E-15 | -2.63127 | 1 | 1 MIR5692C2       | --     |
| ENSG00000266669 | 5.13E-15 | -2.63127 | 1 | 1 AC097452.1      | --     |
| ENSG00000266670 | 5.13E-15 | -2.63127 | 1 | 1 RN7SL637P       | --     |
| ENSG00000266671 | 5.13E-15 | -2.63127 | 1 | 1 AC113342.1      | --     |
| ENSG00000266673 | 5.13E-15 | -2.63127 | 1 | 1 RP11-822E23.3   | --     |
| ENSG00000266675 | 5.13E-15 | -2.63127 | 1 | 1 AL606923.1      | --     |
| ENSG00000266676 | 5.13E-15 | -2.63127 | 1 | 1 MIR4297         | --     |
| ENSG00000266678 | 5.13E-15 | -2.63127 | 1 | 1 AL139151.1      | --     |
| ENSG00000266682 | 5.13E-15 | -2.63127 | 1 | 1 AL590558.1      | --     |
| ENSG00000266683 | 5.13E-15 | -2.63127 | 1 | 1 AL358354.1      | --     |
| ENSG00000266684 | 5.13E-15 | -2.63127 | 1 | 1 AL117337.1      | --     |
| ENSG00000266685 | 5.13E-15 | -2.63127 | 1 | 1 AC139453.1      | --     |
| ENSG00000266687 | 5.13E-15 | -2.63127 | 1 | 1 AL356261.1      | --     |
| ENSG00000266688 | 5.13E-15 | -2.63127 | 1 | 1 AC079398.1      | --     |
| ENSG00000266690 | 5.13E-15 | -2.63127 | 1 | 1 MIR4274         | --     |
| ENSG00000266691 | 5.13E-15 | -2.63127 | 1 | 1 RP11-1109M24.15 | --     |
| ENSG00000266692 | 5.13E-15 | -2.63127 | 1 | 1 snoZ6           | --     |
| ENSG00000266693 | 5.13E-15 | -2.63127 | 1 | 1 OR4K8P          | K04257 |
| ENSG00000266694 | 5.13E-15 | -2.63127 | 1 | 1 RN7SL626P       | --     |
| ENSG00000266696 | 5.13E-15 | -2.63127 | 1 | 1 RP11-30L3.2     | --     |
| ENSG00000266697 | 5.13E-15 | -2.63127 | 1 | 1 AC105339.2      | --     |
| ENSG00000266698 | 5.13E-15 | -2.63127 | 1 | 1 MIR3945         | --     |
| ENSG00000266699 | 5.13E-15 | -2.63127 | 1 | 1 AL512655.1      | --     |
| ENSG00000266700 | 5.13E-15 | -2.63127 | 1 | 1 AL139396.1      | --     |
| ENSG00000266701 | 5.13E-15 | -2.63127 | 1 | 1 AC005702.4      | --     |
| ENSG00000266703 | 5.13E-15 | -2.63127 | 1 | 1 MIR4490         | --     |
| ENSG00000266704 | 5.13E-15 | -2.63127 | 1 | 1 MIR4498         | --     |
| ENSG00000266705 | 5.13E-15 | -2.63127 | 1 | 1 MIR4437         | --     |
| ENSG00000266706 | 5.13E-15 | -2.63127 | 1 | 1 AL122127.5      | --     |
| ENSG00000266707 | 5.13E-15 | -2.63127 | 1 | 1 PSMD7P1         | K03038 |
| ENSG00000266709 | 5.13E-15 | -2.63127 | 1 | 1 RP11-214O1.2    | --     |
| ENSG00000266710 | 5.13E-15 | -2.63127 | 1 | 1 RN7SL48P        | --     |
| ENSG00000266711 | 5.13E-15 | -2.63127 | 1 | 1 RP11-398J5.1    | --     |
| ENSG00000266712 | 5.13E-15 | -2.63127 | 1 | 1 hsa-mir-3149    | --     |
| ENSG00000266713 | 5.13E-15 | -2.63127 | 1 | 1 AC009695.1      | --     |
| ENSG00000266715 | 5.13E-15 | -2.63127 | 1 | 1 MIR5090         | --     |
| ENSG00000266717 | 5.13E-15 | -2.63127 | 1 | 1 RP11-855A2.3    | --     |
| ENSG00000266718 | 5.13E-15 | -2.63127 | 1 | 1 RP11-466A19.1   | --     |
| ENSG00000266719 | 5.13E-15 | -2.63127 | 1 | 1 MIR4676         | --     |
| ENSG00000266720 | 5.13E-15 | -2.63127 | 1 | 1 RN7SL14P        | --     |
| ENSG00000266722 | 5.13E-15 | -2.63127 | 1 | 1 MIR3940         | --     |
| ENSG00000266724 | 5.13E-15 | -2.63127 | 1 | 1 AC108721.2      | --     |
| ENSG00000266727 | 5.13E-15 | -2.63127 | 1 | 1 AC004824.1      | --     |
| ENSG00000266729 | 5.13E-15 | -2.63127 | 1 | 1 RP11-534N16.1   | --     |
| ENSG00000266730 | 5.13E-15 | -2.63127 | 1 | 1 RN7SL773P       | --     |
| ENSG00000266731 | 5.13E-15 | -2.63127 | 1 | 1 AL732314.1      | --     |
| ENSG00000266732 | 5.13E-15 | -2.63127 | 1 | 1 AL359922.1      | --     |
| ENSG00000266733 | 5.13E-15 | -2.63127 | 1 | 1 TBC1D29         | K11837 |
| ENSG00000266734 | 5.13E-15 | -2.63127 | 1 | 1 AP003471.3      | --     |
| ENSG00000266736 | 5.13E-15 | -2.63127 | 1 | 1 RP11-260A9.4    | K03121 |
| ENSG00000266737 | 5.13E-15 | -2.63127 | 1 | 1 MIR4691         | --     |

|                 |          |          |   |                  |        |
|-----------------|----------|----------|---|------------------|--------|
| ENSG00000266738 | 5.13E-15 | -2.63127 | 1 | 1 MIR4757        | --     |
| ENSG00000266739 | 5.13E-15 | -2.63127 | 1 | 1 AL138796.1     | --     |
| ENSG00000266740 | 5.13E-15 | -2.63127 | 1 | 1 MIR4708        | --     |
| ENSG00000266743 | 5.13E-15 | -2.63127 | 1 | 1 RP11-94B19.6   | --     |
| ENSG00000266744 | 5.13E-15 | -2.63127 | 1 | 1 RP11-131K5.1   | --     |
| ENSG00000266745 | 5.13E-15 | -2.63127 | 1 | 1 MIR3135A       | --     |
| ENSG00000266746 | 5.13E-15 | -2.63127 | 1 | 1 RP11-1109M24.7 | --     |
| ENSG00000266749 | 5.13E-15 | -2.63127 | 1 | 1 RN7SL46P       | --     |
| ENSG00000266751 | 5.13E-15 | -2.63127 | 1 | 1 MIR3661        | --     |
| ENSG00000266754 | 5.13E-15 | -2.63127 | 1 | 1 RN7SL524P      | --     |
| ENSG00000266756 | 5.13E-15 | -2.63127 | 1 | 1 MIR5680        | --     |
| ENSG00000266757 | 5.13E-15 | -2.63127 | 1 | 1 AC092962.1     | --     |
| ENSG00000266758 | 5.13E-15 | -2.63127 | 1 | 1 MIR3680-2      | --     |
| ENSG00000266760 | 5.13E-15 | -2.63127 | 1 | 1 MIR4464        | --     |
| ENSG00000266761 | 5.13E-15 | -2.63127 | 1 | 1 MIR3194        | --     |
| ENSG00000266763 | 5.13E-15 | -2.63127 | 1 | 1 AL033528.1     | --     |
| ENSG00000266765 | 5.13E-15 | -2.63127 | 1 | 1 CTD-2582D11.1  | --     |
| ENSG00000266767 | 5.13E-15 | -2.63127 | 1 | 1 RP11-678G15.2  | --     |
| ENSG00000266768 | 5.13E-15 | -2.63127 | 1 | 1 AC016727.1     | --     |
| ENSG00000266769 | 5.13E-15 | -2.63127 | 1 | 1 AL353751.1     | --     |
| ENSG00000266770 | 5.13E-15 | -2.63127 | 1 | 1 RN7SL619P      | --     |
| ENSG00000266771 | 5.13E-15 | -2.63127 | 1 | 1 RP11-19P22.10  | --     |
| ENSG00000266772 | 5.13E-15 | -2.63127 | 1 | 1 AC091738.2     | --     |
| ENSG00000266774 | 5.13E-15 | -2.63127 | 1 | 1 RP11-321M21.1  | --     |
| ENSG00000266775 | 5.13E-15 | -2.63127 | 1 | 1 RP11-218M11.6  | --     |
| ENSG00000266776 | 5.13E-15 | -2.63127 | 1 | 1 MIR4646        | --     |
| ENSG00000266778 | 5.13E-15 | -2.63127 | 1 | 1 hsa-mir-548ba  | --     |
| ENSG00000266780 | 5.13E-15 | -2.63127 | 1 | 1 MIR4444-1      | --     |
| ENSG00000266782 | 5.13E-15 | -2.63127 | 1 | 1 MIR3663        | --     |
| ENSG00000266786 | 5.13E-15 | -2.63127 | 1 | 1 RP1-66C13.3    | K10093 |
| ENSG00000266792 | 5.13E-15 | -2.63127 | 1 | 1 RN7SL839P      | --     |
| ENSG00000266793 | 5.13E-15 | -2.63127 | 1 | 1 AL137008.1     | --     |
| ENSG00000266794 | 5.13E-15 | -2.63127 | 1 | 1 RN7SL7P        | --     |
| ENSG00000266795 | 5.13E-15 | -2.63127 | 1 | 1 RP11-744K17.9  | --     |
| ENSG00000266798 | 5.13E-15 | -2.63127 | 1 | 1 AC078816.1     | --     |
| ENSG00000266799 | 5.13E-15 | -2.63127 | 1 | 1 AP003356.1     | --     |
| ENSG00000266800 | 5.13E-15 | -2.63127 | 1 | 1 AL135791.1     | --     |
| ENSG00000266802 | 5.13E-15 | -2.63127 | 1 | 1 MIR4419A       | --     |
| ENSG00000266803 | 5.13E-15 | -2.63127 | 1 | 1 RP1-77H15.1    | --     |
| ENSG00000266805 | 5.13E-15 | -2.63127 | 1 | 1 RP11-61L19.1   | --     |
| ENSG00000266806 | 5.13E-15 | -2.63127 | 1 | 1 RP11-744K17.3  | K09228 |
| ENSG00000266807 | 5.13E-15 | -2.63127 | 1 | 1 MIR548H5       | --     |
| ENSG00000266808 | 5.13E-15 | -2.63127 | 1 | 1 MIR548AE1      | --     |
| ENSG00000266809 | 5.13E-15 | -2.63127 | 1 | 1 RP11-449D8.3   | --     |
| ENSG00000266813 | 5.13E-15 | -2.63127 | 1 | 1 AF196779.1     | --     |
| ENSG00000266814 | 5.13E-15 | -2.63127 | 1 | 1 AP000868.1     | --     |
| ENSG00000266816 | 5.13E-15 | -2.63127 | 1 | 1 AL356750.1     | --     |
| ENSG00000266817 | 5.13E-15 | -2.63127 | 1 | 1 AC118063.1     | --     |
| ENSG00000266818 | 5.13E-15 | -2.63127 | 1 | 1 RP11-454P7.1   | K09228 |
| ENSG00000266820 | 5.13E-15 | -2.63127 | 1 | 1 RP13-104F24.1  | K15043 |
| ENSG00000266821 | 5.13E-15 | -2.63127 | 1 | 1 RP11-6N17.2    | --     |
| ENSG00000266822 | 5.13E-15 | -2.63127 | 1 | 1 AL928874.1     | --     |
| ENSG00000266825 | 5.13E-15 | -2.63127 | 1 | 1 AL590085.1     | --     |
| ENSG00000266827 | 5.13E-15 | -2.63127 | 1 | 1 MIR3689E       | --     |
| ENSG00000266828 | 5.13E-15 | -2.63127 | 1 | 1 RN7SL712P      | --     |
| ENSG00000266829 | 5.13E-15 | -2.63127 | 1 | 1 RN7SL661P      | --     |
| ENSG00000266830 | 5.13E-15 | -2.63127 | 1 | 1 CTD-2008P7.8   | --     |
| ENSG00000266836 | 5.13E-15 | -2.63127 | 1 | 1 RP11-1109M24.8 | --     |

|                 |          |          |   |                  |        |
|-----------------|----------|----------|---|------------------|--------|
| ENSG00000266837 | 5.13E-15 | -2.63127 | 1 | 1 Z97055.1       | --     |
| ENSG00000266838 | 5.13E-15 | -2.63127 | 1 | 1 AP001634.1     | --     |
| ENSG00000266839 | 5.13E-15 | -2.63127 | 1 | 1 U6             | --     |
| ENSG00000266840 | 5.13E-15 | -2.63127 | 1 | 1 RP11-543H23.2  | --     |
| ENSG00000266846 | 5.13E-15 | -2.63127 | 1 | 1 RP11-793A3.2   | --     |
| ENSG00000266849 | 5.13E-15 | -2.63127 | 1 | 1 AC083906.2     | --     |
| ENSG00000266853 | 5.13E-15 | -2.63127 | 1 | 1 ITM2BP1        | K18264 |
| ENSG00000266854 | 5.13E-15 | -2.63127 | 1 | 1 AP003096.1     | --     |
| ENSG00000266855 | 5.13E-15 | -2.63127 | 1 | 1 MIR3910-2      | --     |
| ENSG00000266857 | 5.13E-15 | -2.63127 | 1 | 1 AF186996.2     | --     |
| ENSG00000266858 | 5.13E-15 | -2.63127 | 1 | 1 RP11-557B23.3  | K02998 |
| ENSG00000266859 | 5.13E-15 | -2.63127 | 1 | 1 AP000719.1     | --     |
| ENSG00000266861 | 5.13E-15 | -2.63127 | 1 | 1 AC097506.1     | --     |
| ENSG00000266862 | 5.13E-15 | -2.63127 | 1 | 1 AC004595.1     | --     |
| ENSG00000266863 | 5.13E-15 | -2.63127 | 1 | 1 RN7SL123P      | --     |
| ENSG00000266864 | 5.13E-15 | -2.63127 | 1 | 1 AC116606.1     | --     |
| ENSG00000266865 | 5.13E-15 | -2.63127 | 1 | 1 RP11-848P1.9   | K04678 |
| ENSG00000266866 | 5.13E-15 | -2.63127 | 1 | 1 AP002761.1     | --     |
| ENSG00000266867 | 5.13E-15 | -2.63127 | 1 | 1 AL031005.1     | --     |
| ENSG00000266868 | 5.13E-15 | -2.63127 | 1 | 1 MIR4517        | --     |
| ENSG00000266869 | 5.13E-15 | -2.63127 | 1 | 1 RP6-114E22.1   | --     |
| ENSG00000266875 | 5.13E-15 | -2.63127 | 1 | 1 RN7SL408P      | --     |
| ENSG00000266876 | 5.13E-15 | -2.63127 | 1 | 1 RP11-1148O4.1  | K08492 |
| ENSG00000266877 | 5.13E-15 | -2.63127 | 1 | 1 RP1-41C23.1    | --     |
| ENSG00000266881 | 5.13E-15 | -2.63127 | 1 | 1 AL353662.4     | --     |
| ENSG00000266885 | 5.13E-15 | -2.63127 | 1 | 1 RP11-744K17.2  | --     |
| ENSG00000266887 | 5.13E-15 | -2.63127 | 1 | 1 MIR4535        | --     |
| ENSG00000266889 | 5.13E-15 | -2.63127 | 1 | 1 RN7SL88P       | --     |
| ENSG00000266890 | 5.13E-15 | -2.63127 | 1 | 1 MIR4634        | --     |
| ENSG00000266892 | 5.13E-15 | -2.63127 | 1 | 1 AP000301.1     | --     |
| ENSG00000266893 | 5.13E-15 | -2.63127 | 1 | 1 AC005616.1     | --     |
| ENSG00000266899 | 5.13E-15 | -2.63127 | 1 | 1 AKR1B1P7       | K00011 |
| ENSG00000266900 | 5.13E-15 | -2.63127 | 1 | 1 RP11-173A16.2  | --     |
| ENSG00000266901 | 5.13E-15 | -2.63127 | 1 | 1 RP11-567M16.5  | --     |
| ENSG00000266906 | 5.13E-15 | -2.63127 | 1 | 1 AC005357.1     | --     |
| ENSG00000266907 | 5.13E-15 | -2.63127 | 1 | 1 AC006116.22    | K00111 |
| ENSG00000266908 | 5.13E-15 | -2.63127 | 1 | 1 RP5-1022P6.7   | --     |
| ENSG00000266909 | 5.13E-15 | -2.63127 | 1 | 1 SLC25A6P4      | --     |
| ENSG00000266911 | 5.13E-15 | -2.63127 | 1 | 1 RP1-161P9.5    | --     |
| ENSG00000266912 | 5.13E-15 | -2.63127 | 1 | 1 CTC-325H20.2   | --     |
| ENSG00000266915 | 5.13E-15 | -2.63127 | 1 | 1 MRPS5P4        | --     |
| ENSG00000266916 | 5.13E-15 | -2.63127 | 1 | 1 CTD-3064H18.1  | --     |
| ENSG00000266919 | 5.13E-15 | -2.63127 | 1 | 1 MIR3184        | --     |
| ENSG00000266923 | 5.13E-15 | -2.63127 | 1 | 1 RP11-693J15.4  | --     |
| ENSG00000266925 | 5.13E-15 | -2.63127 | 1 | 1 RP11-434D2.7   | --     |
| ENSG00000266928 | 5.13E-15 | -2.63127 | 1 | 1 CTB-70G10.1    | --     |
| ENSG00000266929 | 5.13E-15 | -2.63127 | 1 | 1 RP11-400F19.8  | --     |
| ENSG00000266931 | 5.13E-15 | -2.63127 | 1 | 1 RP11-1252D15.1 | --     |
| ENSG00000266932 | 5.13E-15 | -2.63127 | 1 | 1 AC006116.13    | K18159 |
| ENSG00000266935 | 5.13E-15 | -2.63127 | 1 | 1 CTD-3234P18.2  | --     |
| ENSG00000266938 | 5.13E-15 | -2.63127 | 1 | 1 AC119403.1     | K09228 |
| ENSG00000266939 | 5.13E-15 | -2.63127 | 1 | 1 AC005559.2     | --     |
| ENSG00000266943 | 5.13E-15 | -2.63127 | 1 | 1 RP11-15E18.2   | K02998 |
| ENSG00000266945 | 5.13E-15 | -2.63127 | 1 | 1 OR4G3P         | --     |
| ENSG00000266949 | 5.13E-15 | -2.63127 | 1 | 1 LYPD8          | --     |
| ENSG00000266950 | 5.13E-15 | -2.63127 | 1 | 1 CTD-2623N2.5   | --     |
| ENSG00000266951 | 5.13E-15 | -2.63127 | 1 | 1 AD000091.2     | --     |
| ENSG00000266952 | 5.13E-15 | -2.63127 | 1 | 1 RP11-909B2.1   | --     |



|                 |          |          |   |                   |        |
|-----------------|----------|----------|---|-------------------|--------|
| ENSG00000266954 | 5.13E-15 | -2.63127 | 1 | 1 RP11-701H16.4   | _      |
| ENSG00000266956 | 5.13E-15 | -2.63127 | 1 | 1 CTB-186H2.3     | K05514 |
| ENSG00000266958 | 5.13E-15 | -2.63127 | 1 | 1 AC006126.3      | _      |
| ENSG00000266960 | 5.13E-15 | -2.63127 | 1 | 1 FAM106DP        | _      |
| ENSG00000266961 | 5.13E-15 | -2.63127 | 1 | 1 RP11-973H7.5    | _      |
| ENSG00000266963 | 5.13E-15 | -2.63127 | 1 | 1 AC005625.1      | _      |
| ENSG00000266965 | 5.13E-15 | -2.63127 | 1 | 1 RP11-712P20.2   | _      |
| ENSG00000266968 | 5.13E-15 | -2.63127 | 1 | 1 RP11-116O18.1   | _      |
| ENSG00000266971 | 5.13E-15 | -2.63127 | 1 | 1 OR4F8P          | K04257 |
| ENSG00000266972 | 5.13E-15 | -2.63127 | 1 | 1 LRRC37A9P       | K12581 |
| ENSG00000266973 | 5.13E-15 | -2.63127 | 1 | 1 CTD-3162L10.3   | _      |
| ENSG00000266976 | 5.13E-15 | -2.63127 | 1 | 1 AC079466.1      | _      |
| ENSG00000266977 | 5.13E-15 | -2.63127 | 1 | 1 CTC-459F4.5     | _      |
| ENSG00000266978 | 5.13E-15 | -2.63127 | 1 | 1 CTD-2369P2.5    | _      |
| ENSG00000266979 | 5.13E-15 | -2.63127 | 1 | 1 RP11-1072C15.2  | _      |
| ENSG00000266981 | 5.13E-15 | -2.63127 | 1 | 1 RP11-799D4.2    | _      |
| ENSG00000266984 | 5.13E-15 | -2.63127 | 1 | 1 RP11-23B5.1     | K03024 |
| ENSG00000266985 | 5.13E-15 | -2.63127 | 1 | 1 CTD-2329C7.2    | _      |
| ENSG00000266988 | 5.13E-15 | -2.63127 | 1 | 1 RP11-749H17.1   | _      |
| ENSG00000266989 | 5.13E-15 | -2.63127 | 1 | 1 FTLP5           | K13625 |
| ENSG00000266995 | 5.13E-15 | -2.63127 | 1 | 1 RP11-703I16.3   | K11110 |
| ENSG00000266996 | 5.13E-15 | -2.63127 | 1 | 1 TCEB3CL2        | K15076 |
| ENSG00000266997 | 5.13E-15 | -2.63127 | 1 | 1 RP11-886H22.1   | K10357 |
| ENSG00000266999 | 5.13E-15 | -2.63127 | 1 | 1 AC015849.16     | _      |
| ENSG00000267000 | 5.13E-15 | -2.63127 | 1 | 1 RP11-27G24.3    | _      |
| ENSG00000267001 | 5.13E-15 | -2.63127 | 1 | 1 AC006538.4      | K14709 |
| ENSG00000267004 | 5.13E-15 | -2.63127 | 1 | 1 CTD-2659N19.4   | _      |
| ENSG00000267005 | 5.13E-15 | -2.63127 | 1 | 1 AC002984.2      | _      |
| ENSG00000267007 | 5.13E-15 | -2.63127 | 1 | 1 CTB-31O20.3     | _      |
| ENSG00000267012 | 5.13E-15 | -2.63127 | 1 | 1 CTC-360P9.1     | _      |
| ENSG00000267013 | 5.13E-15 | -2.63127 | 1 | 1 CTD-2171N6.1    | _      |
| ENSG00000267014 | 5.13E-15 | -2.63127 | 1 | 1 CTD-2081K17.2   | _      |
| ENSG00000267015 | 5.13E-15 | -2.63127 | 1 | 1 RP11-800A18.4   | _      |
| ENSG00000267019 | 5.13E-15 | -2.63127 | 1 | 1 NTF6A           | K12457 |
| ENSG00000267020 | 5.13E-15 | -2.63127 | 1 | 1 AC011558.5      | _      |
| ENSG00000267021 | 5.13E-15 | -2.63127 | 1 | 1 MIR4321         | _      |
| ENSG00000267022 | 5.13E-15 | -2.63127 | 1 | 1 ZNF223          | K09228 |
| ENSG00000267023 | 5.13E-15 | -2.63127 | 1 | 1 LRRC37A16P      | _      |
| ENSG00000267024 | 5.13E-15 | -2.63127 | 1 | 1 CTD-2588C8.8    | _      |
| ENSG00000267027 | 5.13E-15 | -2.63127 | 1 | 1 AC011524.2      | _      |
| ENSG00000267028 | 5.13E-15 | -2.63127 | 1 | 1 RP11-619L19.1   | _      |
| ENSG00000267029 | 5.13E-15 | -2.63127 | 1 | 1 AC092299.7      | _      |
| ENSG00000267030 | 5.13E-15 | -2.63127 | 1 | 1 CTB-50L17.7     | _      |
| ENSG00000267034 | 5.13E-15 | -2.63127 | 1 | 1 RP11-384O8.1    | _      |
| ENSG00000267035 | 5.13E-15 | -2.63127 | 1 | 1 RP11-1094M14.10 | _      |
| ENSG00000267037 | 5.13E-15 | -2.63127 | 1 | 1 AC005757.7      | _      |
| ENSG00000267038 | 5.13E-15 | -2.63127 | 1 | 1 RP11-1096D5.2   | _      |
| ENSG00000267039 | 5.13E-15 | -2.63127 | 1 | 1 RP11-58G13.1    | _      |
| ENSG00000267042 | 5.13E-15 | -2.63127 | 1 | 1 CTD-3193K9.4    | _      |
| ENSG00000267043 | 5.13E-15 | -2.63127 | 1 | 1 CTB-91J4.3      | K11837 |
| ENSG00000267044 | 5.13E-15 | -2.63127 | 1 | 1 AC005757.6      | _      |
| ENSG00000267045 | 5.13E-15 | -2.63127 | 1 | 1 AC006126.4      | _      |
| ENSG00000267046 | 5.13E-15 | -2.63127 | 1 | 1 RP11-1094M14.9  | K06620 |
| ENSG00000267047 | 5.13E-15 | -2.63127 | 1 | 1 RP11-589P10.7   | _      |
| ENSG00000267054 | 5.13E-15 | -2.63127 | 1 | 1 CTD-2540B15.10  | _      |
| ENSG00000267055 | 5.13E-15 | -2.63127 | 1 | 1 RP11-486P11.1   | _      |
| ENSG00000267056 | 5.13E-15 | -2.63127 | 1 | 1 AC005336.4      | K00915 |
| ENSG00000267057 | 5.13E-15 | -2.63127 | 1 | 1 RP11-456O19.2   | _      |

|                 |          |          |   |                   |        |
|-----------------|----------|----------|---|-------------------|--------|
| ENSG00000267061 | 5.13E-15 | -2.63127 | 1 | 1 RP11-760L24.1   | --     |
| ENSG00000267062 | 5.13E-15 | -2.63127 | 1 | 1 CTD-2659N19.10  | --     |
| ENSG00000267063 | 5.13E-15 | -2.63127 | 1 | 1 AC006130.3      | --     |
| ENSG00000267065 | 5.13E-15 | -2.63127 | 1 | 1 CTD-2246P4.1    | --     |
| ENSG00000267066 | 5.13E-15 | -2.63127 | 1 | 1 RP11-866E20.1   | --     |
| ENSG00000267067 | 5.13E-15 | -2.63127 | 1 | 1 CTB-75G16.3     | --     |
| ENSG00000267070 | 5.13E-15 | -2.63127 | 1 | 1 RP11-10K17.6    | --     |
| ENSG00000267072 | 5.13E-15 | -2.63127 | 1 | 1 RP11-165E7.1    | --     |
| ENSG00000267074 | 5.13E-15 | -2.63127 | 1 | 1 RP11-1094M14.5  | --     |
| ENSG00000267075 | 5.13E-15 | -2.63127 | 1 | 1 RP11-434D2.3    | --     |
| ENSG00000267076 | 5.13E-15 | -2.63127 | 1 | 1 CCDC58P3        | K16741 |
| ENSG00000267077 | 5.13E-15 | -2.63127 | 1 | 1 RP11-127I20.5   | --     |
| ENSG00000267079 | 5.13E-15 | -2.63127 | 1 | 1 RP11-820I16.1   | --     |
| ENSG00000267081 | 5.13E-15 | -2.63127 | 1 | 1 CTC-400I9.2     | --     |
| ENSG00000267083 | 5.13E-15 | -2.63127 | 1 | 1 KRT18P61        | K07604 |
| ENSG00000267084 | 5.13E-15 | -2.63127 | 1 | 1 RP11-666A8.11   | K18184 |
| ENSG00000267085 | 5.13E-15 | -2.63127 | 1 | 1 RP11-15J10.9    | --     |
| ENSG00000267086 | 5.13E-15 | -2.63127 | 1 | 1 YWHAEP6         | K06630 |
| ENSG00000267089 | 5.13E-15 | -2.63127 | 1 | 1 CTC-499B15.8    | --     |
| ENSG00000267090 | 5.13E-15 | -2.63127 | 1 | 1 AC005789.9      | --     |
| ENSG00000267091 | 5.13E-15 | -2.63127 | 1 | 1 CTBP2P7         | K04496 |
| ENSG00000267094 | 5.13E-15 | -2.63127 | 1 | 1 CTC-360P9.5     | --     |
| ENSG00000267095 | 5.13E-15 | -2.63127 | 1 | 1 CTD-2319I12.5   | --     |
| ENSG00000267097 | 5.13E-15 | -2.63127 | 1 | 1 RP11-309E23.2   | --     |
| ENSG00000267098 | 5.13E-15 | -2.63127 | 1 | 1 RP11-325K19.1   | --     |
| ENSG00000267099 | 5.13E-15 | -2.63127 | 1 | 1 NTF6G           | K12457 |
| ENSG00000267101 | 5.13E-15 | -2.63127 | 1 | 1 RP11-846C15.2   | --     |
| ENSG00000267104 | 5.13E-15 | -2.63127 | 1 | 1 TBC1D3P1-DHX401 | --     |
| ENSG00000267105 | 5.13E-15 | -2.63127 | 1 | 1 CTD-2369P2.4    | --     |
| ENSG00000267107 | 5.13E-15 | -2.63127 | 1 | 1 AC011526.1      | --     |
| ENSG00000267109 | 5.13E-15 | -2.63127 | 1 | 1 CTD-2378E21.1   | --     |
| ENSG00000267113 | 5.13E-15 | -2.63127 | 1 | 1 AF038458.4      | --     |
| ENSG00000267115 | 5.13E-15 | -2.63127 | 1 | 1 CTD-3064H18.2   | --     |
| ENSG00000267116 | 5.13E-15 | -2.63127 | 1 | 1 RP11-64C12.7    | K17497 |
| ENSG00000267118 | 5.13E-15 | -2.63127 | 1 | 1 CTB-91J4.1      | --     |
| ENSG00000267119 | 5.13E-15 | -2.63127 | 1 | 1 RPL10P15        | K02866 |
| ENSG00000267120 | 5.13E-15 | -2.63127 | 1 | 1 AD000671.6      | K12836 |
| ENSG00000267124 | 5.13E-15 | -2.63127 | 1 | 1 CTD-3113P16.5   | --     |
| ENSG00000267125 | 5.13E-15 | -2.63127 | 1 | 1 CTB-31O20.6     | --     |
| ENSG00000267128 | 5.13E-15 | -2.63127 | 1 | 1 RNF157-AS1      | --     |
| ENSG00000267129 | 5.13E-15 | -2.63127 | 1 | 1 OR1AC1P         | --     |
| ENSG00000267130 | 5.13E-15 | -2.63127 | 1 | 1 CTD-2540B15.9   | --     |
| ENSG00000267132 | 5.13E-15 | -2.63127 | 1 | 1 HMGB3P27        | K11296 |
| ENSG00000267133 | 5.13E-15 | -2.63127 | 1 | 1 AC011518.2      | --     |
| ENSG00000267134 | 5.13E-15 | -2.63127 | 1 | 1 RP11-146N18.1   | --     |
| ENSG00000267135 | 5.13E-15 | -2.63127 | 1 | 1 AD000091.3      | K02893 |
| ENSG00000267136 | 5.13E-15 | -2.63127 | 1 | 1 RP11-53B2.3     | --     |
| ENSG00000267137 | 5.13E-15 | -2.63127 | 1 | 1 RP11-15K2.2     | --     |
| ENSG00000267139 | 5.13E-15 | -2.63127 | 1 | 1 AC005262.3      | --     |
| ENSG00000267140 | 5.13E-15 | -2.63127 | 1 | 1 RP11-322E11.6   | K11667 |
| ENSG00000267142 | 5.13E-15 | -2.63127 | 1 | 1 CTD-3162L10.5   | K01068 |
| ENSG00000267143 | 5.13E-15 | -2.63127 | 1 | 1 RP11-677O4.6    | --     |
| ENSG00000267144 | 5.13E-15 | -2.63127 | 1 | 1 AC067968.3      | --     |
| ENSG00000267145 | 5.13E-15 | -2.63127 | 1 | 1 AC006116.14     | --     |
| ENSG00000267146 | 5.13E-15 | -2.63127 | 1 | 1 RP11-383D22.1   | --     |
| ENSG00000267148 | 5.13E-15 | -2.63127 | 1 | 1 AC005777.3      | --     |
| ENSG00000267149 | 5.13E-15 | -2.63127 | 1 | 1 CTC-550B14.6    | --     |
| ENSG00000267151 | 5.13E-15 | -2.63127 | 1 | 1 MIR2117         | --     |

|                 |          |          |   |                 |        |
|-----------------|----------|----------|---|-----------------|--------|
| ENSG00000267153 | 5.13E-15 | -2.63127 | 1 | 1 CTBP2P3       | K04496 |
| ENSG00000267154 | 5.13E-15 | -2.63127 | 1 | 1 OR1M4P        | K04257 |
| ENSG00000267156 | 5.13E-15 | -2.63127 | 1 | 1 TPMTP1        | K00569 |
| ENSG00000267162 | 5.13E-15 | -2.63127 | 1 | 1 RP11-815J4.4  | K00237 |
| ENSG00000267165 | 5.13E-15 | -2.63127 | 1 | 1 RP11-78A19.3  | -      |
| ENSG00000267166 | 5.13E-15 | -2.63127 | 1 | 1 RP11-527L4.5  | -      |
| ENSG00000267168 | 5.13E-15 | -2.63127 | 1 | 1 RP11-318A15.7 | -      |
| ENSG00000267170 | 5.13E-15 | -2.63127 | 1 | 1 CALM2P1       | K02183 |
| ENSG00000267172 | 5.13E-15 | -2.63127 | 1 | 1 RP11-397A16.3 | -      |
| ENSG00000267173 | 5.13E-15 | -2.63127 | 1 | 1 CTC-512J12.6  | K09228 |
| ENSG00000267175 | 5.13E-15 | -2.63127 | 1 | 1 RP11-879F14.1 | -      |
| ENSG00000267177 | 5.13E-15 | -2.63127 | 1 | 1 RP11-756J15.3 | -      |
| ENSG00000267178 | 5.13E-15 | -2.63127 | 1 | 1 PHF5CP        | K12834 |
| ENSG00000267180 | 5.13E-15 | -2.63127 | 1 | 1 AC007136.1    | -      |
| ENSG00000267181 | 5.13E-15 | -2.63127 | 1 | 1 RP11-428O23.1 | K13241 |
| ENSG00000267182 | 5.13E-15 | -2.63127 | 1 | 1 RP11-382N13.5 | K11095 |
| ENSG00000267184 | 5.13E-15 | -2.63127 | 1 | 1 RP1-200G19.1  | K09647 |
| ENSG00000267187 | 5.13E-15 | -2.63127 | 1 | 1 RP11-767C4.1  | -      |
| ENSG00000267188 | 5.13E-15 | -2.63127 | 1 | 1 CTC-512J12.4  | -      |
| ENSG00000267189 | 5.13E-15 | -2.63127 | 1 | 1 ATP5LP7       | K02140 |
| ENSG00000267190 | 5.13E-15 | -2.63127 | 1 | 1 AC002314.4    | K00560 |
| ENSG00000267192 | 5.13E-15 | -2.63127 | 1 | 1 AC006116.12   | -      |
| ENSG00000267193 | 5.13E-15 | -2.63127 | 1 | 1 RP11-116O18.3 | -      |
| ENSG00000267195 | 5.13E-15 | -2.63127 | 1 | 1 MIR212        | -      |
| ENSG00000267196 | 5.13E-15 | -2.63127 | 1 | 1 RP11-813F20.4 | -      |
| ENSG00000267201 | 5.13E-15 | -2.63127 | 1 | 1 AC005624.2    | -      |
| ENSG00000267202 | 5.13E-15 | -2.63127 | 1 | 1 RP11-797E24.3 | -      |
| ENSG00000267204 | 5.13E-15 | -2.63127 | 1 | 1 AC011518.1    | -      |
| ENSG00000267205 | 5.13E-15 | -2.63127 | 1 | 1 AC005954.4    | -      |
| ENSG00000267206 | 5.13E-15 | -2.63127 | 1 | 1 LCN6          | -      |
| ENSG00000267207 | 5.13E-15 | -2.63127 | 1 | 1 RP11-264B14.1 | -      |
| ENSG00000267209 | 5.13E-15 | -2.63127 | 1 | 1 RP11-693L9.2  | -      |
| ENSG00000267212 | 5.13E-15 | -2.63127 | 1 | 1 CTD-2659N19.9 | -      |
| ENSG00000267214 | 5.13E-15 | -2.63127 | 1 | 1 CTC-265F19.3  | -      |
| ENSG00000267215 | 5.13E-15 | -2.63127 | 1 | 1 RP11-685A21.1 | -      |
| ENSG00000267220 | 5.13E-15 | -2.63127 | 1 | 1 CTC-260E6.9   | K09228 |
| ENSG00000267221 | 5.13E-15 | -2.63127 | 1 | 1 CTD-2132N18.2 | -      |
| ENSG00000267222 | 5.13E-15 | -2.63127 | 1 | 1 RP11-194N12.2 | -      |
| ENSG00000267223 | 5.13E-15 | -2.63127 | 1 | 1 AC005597.1    | -      |
| ENSG00000267224 | 5.13E-15 | -2.63127 | 1 | 1 AC005498.4    | -      |
| ENSG00000267225 | 5.13E-15 | -2.63127 | 1 | 1 WDR7-OT1      | -      |
| ENSG00000267227 | 5.13E-15 | -2.63127 | 1 | 1 RP11-640I15.2 | -      |
| ENSG00000267232 | 5.13E-15 | -2.63127 | 1 | 1 CTB-31O20.9   | -      |
| ENSG00000267233 | 5.13E-15 | -2.63127 | 1 | 1 HNRNPA3P16    | K12741 |
| ENSG00000267234 | 5.13E-15 | -2.63127 | 1 | 1 CTB-184G21.3  | -      |
| ENSG00000267235 | 5.13E-15 | -2.63127 | 1 | 1 ZNF861P       | K09228 |
| ENSG00000267237 | 5.13E-15 | -2.63127 | 1 | 1 AC092299.6    | K16941 |
| ENSG00000267238 | 5.13E-15 | -2.63127 | 1 | 1 AC093074.1    | -      |
| ENSG00000267239 | 5.13E-15 | -2.63127 | 1 | 1 RP11-794M8.1  | -      |
| ENSG00000267240 | 5.13E-15 | -2.63127 | 1 | 1 AC011524.3    | -      |
| ENSG00000267241 | 5.13E-15 | -2.63127 | 1 | 1 CYP4F10P      | K17726 |
| ENSG00000267243 | 5.13E-15 | -2.63127 | 1 | 1 AC005307.3    | -      |
| ENSG00000267245 | 5.13E-15 | -2.63127 | 1 | 1 CTD-2085J24.5 | -      |
| ENSG00000267246 | 5.13E-15 | -2.63127 | 1 | 1 RP11-798G7.7  | -      |
| ENSG00000267247 | 5.13E-15 | -2.63127 | 1 | 1 RP11-64C12.6  | -      |
| ENSG00000267250 | 5.13E-15 | -2.63127 | 1 | 1 RP11-118B18.2 | -      |
| ENSG00000267251 | 5.13E-15 | -2.63127 | 1 | 1 AC139100.3    | -      |
| ENSG00000267252 | 5.13E-15 | -2.63127 | 1 | 1 RP11-712C7.1  | -      |

|                 |          |          |   |                 |        |
|-----------------|----------|----------|---|-----------------|--------|
| ENSG00000267253 | 5.13E-15 | -2.63127 | 1 | 1 RP11-209M4.1  | K11425 |
| ENSG00000267254 | 5.13E-15 | -2.63127 | 1 | 1 CTD-2162K18.5 | -      |
| ENSG00000267258 | 5.13E-15 | -2.63127 | 1 | 1 CTC-448F2.3   | K03767 |
| ENSG00000267259 | 5.13E-15 | -2.63127 | 1 | 1 CTD-2008P7.9  | -      |
| ENSG00000267260 | 5.13E-15 | -2.63127 | 1 | 1 CTD-2162K18.4 | -      |
| ENSG00000267261 | 5.13E-15 | -2.63127 | 1 | 1 CTD-2132N18.3 | K06062 |
| ENSG00000267262 | 5.13E-15 | -2.63127 | 1 | 1 CTC-232P5.3   | -      |
| ENSG00000267263 | 5.13E-15 | -2.63127 | 1 | 1 RP11-75C10.7  | -      |
| ENSG00000267265 | 5.13E-15 | -2.63127 | 1 | 1 CTC-550B14.7  | -      |
| ENSG00000267267 | 5.13E-15 | -2.63127 | 1 | 1 CTD-3199J23.4 | -      |
| ENSG00000267268 | 5.13E-15 | -2.63127 | 1 | 1 AC007204.2    | -      |
| ENSG00000267269 | 5.13E-15 | -2.63127 | 1 | 1 RP11-2N1.1    | -      |
| ENSG00000267271 | 5.13E-15 | -2.63127 | 1 | 1 RP11-686D22.2 | K10611 |
| ENSG00000267273 | 5.13E-15 | -2.63127 | 1 | 1 CTC-543D15.3  | -      |
| ENSG00000267279 | 5.13E-15 | -2.63127 | 1 | 1 RP11-879F14.2 | -      |
| ENSG00000267284 | 5.13E-15 | -2.63127 | 1 | 1 RP11-397A16.1 | -      |
| ENSG00000267285 | 5.13E-15 | -2.63127 | 1 | 1 RP5-951N9.2   | -      |
| ENSG00000267286 | 5.13E-15 | -2.63127 | 1 | 1 RP11-794M8.2  | -      |
| ENSG00000267287 | 5.13E-15 | -2.63127 | 1 | 1 RP11-567M16.1 | -      |
| ENSG00000267290 | 5.13E-15 | -2.63127 | 1 | 1 AC092192.1    | -      |
| ENSG00000267291 | 5.13E-15 | -2.63127 | 1 | 1 CTB-186G2.1   | -      |
| ENSG00000267292 | 5.13E-15 | -2.63127 | 1 | 1 RP11-703I16.2 | K17908 |
| ENSG00000267293 | 5.13E-15 | -2.63127 | 1 | 1 RP11-8H2.1    | K14553 |
| ENSG00000267295 | 5.13E-15 | -2.63127 | 1 | 1 CTD-2319I12.3 | -      |
| ENSG00000267298 | 5.13E-15 | -2.63127 | 1 | 1 AC006116.19   | -      |
| ENSG00000267301 | 5.13E-15 | -2.63127 | 1 | 1 RPL23AP77     | K02893 |
| ENSG00000267303 | 5.13E-15 | -2.63127 | 1 | 1 CTD-2369P2.12 | -      |
| ENSG00000267305 | 5.13E-15 | -2.63127 | 1 | 1 CTD-3113P16.7 | -      |
| ENSG00000267306 | 5.13E-15 | -2.63127 | 1 | 1 RP11-333J10.2 | -      |
| ENSG00000267308 | 5.13E-15 | -2.63127 | 1 | 1 AC004510.3    | -      |
| ENSG00000267310 | 5.13E-15 | -2.63127 | 1 | 1 OR4G1P        | K04257 |
| ENSG00000267311 | 5.13E-15 | -2.63127 | 1 | 1 RP11-99A1.2   | -      |
| ENSG00000267313 | 5.13E-15 | -2.63127 | 1 | 1 RP11-142I20.1 | -      |
| ENSG00000267314 | 5.13E-15 | -2.63127 | 1 | 1 AC104532.2    | -      |
| ENSG00000267315 | 5.13E-15 | -2.63127 | 1 | 1 RP11-686D22.6 | K12162 |
| ENSG00000267316 | 5.13E-15 | -2.63127 | 1 | 1 RP11-879F14.3 | -      |
| ENSG00000267318 | 5.13E-15 | -2.63127 | 1 | 1 RP11-178C3.1  | K04688 |
| ENSG00000267320 | 5.13E-15 | -2.63127 | 1 | 1 AC005780.1    | -      |
| ENSG00000267324 | 5.13E-15 | -2.63127 | 1 | 1 RP11-411B10.5 | K15500 |
| ENSG00000267325 | 5.13E-15 | -2.63127 | 1 | 1 RP11-397A16.2 | -      |
| ENSG00000267326 | 5.13E-15 | -2.63127 | 1 | 1 AC015849.14   | K02896 |
| ENSG00000267327 | 5.13E-15 | -2.63127 | 1 | 1 CTD-2008L17.1 | -      |
| ENSG00000267328 | 5.13E-15 | -2.63127 | 1 | 1 AC002398.12   | -      |
| ENSG00000267330 | 5.13E-15 | -2.63127 | 1 | 1 AC131056.5    | -      |
| ENSG00000267333 | 5.13E-15 | -2.63127 | 1 | 1 RP11-677O4.7  | K01953 |
| ENSG00000267335 | 5.13E-15 | -2.63127 | 1 | 1 CTB-60B18.6   | K10045 |
| ENSG00000267336 | 5.13E-15 | -2.63127 | 1 | 1 RP11-773H22.2 | K03257 |
| ENSG00000267337 | 5.13E-15 | -2.63127 | 1 | 1 CTC-782O7.1   | -      |
| ENSG00000267338 | 5.13E-15 | -2.63127 | 1 | 1 KB-7G2.9      | -      |
| ENSG00000267339 | 5.13E-15 | -2.63127 | 1 | 1 LINC00906     | -      |
| ENSG00000267341 | 5.13E-15 | -2.63127 | 1 | 1 RP11-640A1.3  | -      |
| ENSG00000267343 | 5.13E-15 | -2.63127 | 1 | 1 CTC-499B15.4  | K09228 |
| ENSG00000267344 | 5.13E-15 | -2.63127 | 1 | 1 CTB-39G8.3    | -      |
| ENSG00000267347 | 5.13E-15 | -2.63127 | 1 | 1 AC015849.13   | -      |
| ENSG00000267349 | 5.13E-15 | -2.63127 | 1 | 1 RP11-686D22.9 | -      |
| ENSG00000267352 | 5.13E-15 | -2.63127 | 1 | 1 SH3GL1P3      | K11247 |
| ENSG00000267353 | 5.13E-15 | -2.63127 | 1 | 1 CTD-2162K18.3 | -      |
| ENSG00000267354 | 5.13E-15 | -2.63127 | 1 | 1 RP11-749H17.2 | -      |

|                 |          |          |   |                   |        |
|-----------------|----------|----------|---|-------------------|--------|
| ENSG00000267359 | 5.13E-15 | -2.63127 | 1 | 1 RP11-1094M14.12 | _      |
| ENSG00000267360 | 5.13E-15 | -2.63127 | 1 | 1 CTC-454I21.3    | K09228 |
| ENSG00000267361 | 5.13E-15 | -2.63127 | 1 | 1 LOC100421166    | K14007 |
| ENSG00000267363 | 5.13E-15 | -2.63127 | 1 | 1 CTD-3162L10.4   | _      |
| ENSG00000267364 | 5.13E-15 | -2.63127 | 1 | 1 RP11-47L3.1     | _      |
| ENSG00000267365 | 5.13E-15 | -2.63127 | 1 | 1 KCNJ2-AS1       | _      |
| ENSG00000267366 | 5.13E-15 | -2.63127 | 1 | 1 RP11-53B2.5     | _      |
| ENSG00000267368 | 5.13E-15 | -2.63127 | 1 | 1 UPK3BL          | K09228 |
| ENSG00000267369 | 5.13E-15 | -2.63127 | 1 | 1 RP11-1094M14.8  | K03130 |
| ENSG00000267371 | 5.13E-15 | -2.63127 | 1 | 1 RP11-712C7.2    | K04469 |
| ENSG00000267373 | 5.13E-15 | -2.63127 | 1 | 1 CTD-2231E14.5   | _      |
| ENSG00000267375 | 5.13E-15 | -2.63127 | 1 | 1 CTB-186G2.4     | _      |
| ENSG00000267376 | 5.13E-15 | -2.63127 | 1 | 1 ATP5LP6         | _      |
| ENSG00000267378 | 5.13E-15 | -2.63127 | 1 | 1 CTC-400I9.3     | _      |
| ENSG00000267379 | 5.13E-15 | -2.63127 | 1 | 1 CTC-548K16.5    | _      |
| ENSG00000267380 | 5.13E-15 | -2.63127 | 1 | 1 RP11-697E22.3   | _      |
| ENSG00000267381 | 5.13E-15 | -2.63127 | 1 | 1 CTD-2086O20.3   | _      |
| ENSG00000267382 | 5.13E-15 | -2.63127 | 1 | 1 RP11-325K19.2   | K01580 |
| ENSG00000267383 | 5.13E-15 | -2.63127 | 1 | 1 CTC-260E6.6     | _      |
| ENSG00000267384 | 5.13E-15 | -2.63127 | 1 | 1 RP11-1072C15.3  | _      |
| ENSG00000267388 | 5.13E-15 | -2.63127 | 1 | 1 AF038458.5      | _      |
| ENSG00000267389 | 5.13E-15 | -2.63127 | 1 | 1 CTC-459F4.7     | _      |
| ENSG00000267391 | 5.13E-15 | -2.63127 | 1 | 1 RP11-1151B14.3  | _      |
| ENSG00000267392 | 5.13E-15 | -2.63127 | 1 | 1 CYP4F9P         | K17726 |
| ENSG00000267393 | 5.13E-15 | -2.63127 | 1 | 1 RP11-691H4.3    | _      |
| ENSG00000267396 | 5.13E-15 | -2.63127 | 1 | 1 RP11-845C23.3   | _      |
| ENSG00000267397 | 5.13E-15 | -2.63127 | 1 | 1 RP11-873E20.1   | _      |
| ENSG00000267399 | 5.13E-15 | -2.63127 | 1 | 1 RP11-456O19.5   | _      |
| ENSG00000267400 | 5.13E-15 | -2.63127 | 1 | 1 RP11-325K19.3   | _      |
| ENSG00000267401 | 5.13E-15 | -2.63127 | 1 | 1 RP11-396N11.1   | _      |
| ENSG00000267402 | 5.13E-15 | -2.63127 | 1 | 1 RP11-619L19.2   | _      |
| ENSG00000267404 | 5.13E-15 | -2.63127 | 1 | 1 RP11-49I11.2    | _      |
| ENSG00000267407 | 5.13E-15 | -2.63127 | 1 | 1 CTD-2050I18.1   | _      |
| ENSG00000267408 | 5.13E-15 | -2.63127 | 1 | 1 CTB-50L17.2     | K02947 |
| ENSG00000267409 | 5.13E-15 | -2.63127 | 1 | 1 RP11-567M16.2   | _      |
| ENSG00000267413 | 5.13E-15 | -2.63127 | 1 | 1 RP11-636O21.1   | _      |
| ENSG00000267415 | 5.13E-15 | -2.63127 | 1 | 1 CTC-503J8.2     | K15013 |
| ENSG00000267417 | 5.13E-15 | -2.63127 | 1 | 1 CTC-239J10.1    | _      |
| ENSG00000267418 | 5.13E-15 | -2.63127 | 1 | 1 TCEB1P29        | K03872 |
| ENSG00000267420 | 5.13E-15 | -2.63127 | 1 | 1 RP11-527L4.6    | _      |
| ENSG00000267421 | 5.13E-15 | -2.63127 | 1 | 1 AC005498.3      | _      |
| ENSG00000267423 | 5.13E-15 | -2.63127 | 1 | 1 AC005616.2      | _      |
| ENSG00000267426 | 5.13E-15 | -2.63127 | 1 | 1 RP11-552F3.12   | K16471 |
| ENSG00000267428 | 5.13E-15 | -2.63127 | 1 | 1 RP11-289E15.1   | _      |
| ENSG00000267429 | 5.13E-15 | -2.63127 | 1 | 1 AC006116.15     | _      |
| ENSG00000267430 | 5.13E-15 | -2.63127 | 1 | 1 RP11-635N19.2   | K03066 |
| ENSG00000267431 | 5.13E-15 | -2.63127 | 1 | 1 RP11-104J23.2   | _      |
| ENSG00000267433 | 5.13E-15 | -2.63127 | 1 | 1 CTD-2057D4.2    | K08789 |
| ENSG00000267436 | 5.13E-15 | -2.63127 | 1 | 1 AC005786.7      | _      |
| ENSG00000267437 | 5.13E-15 | -2.63127 | 1 | 1 CTC-454I21.4    | _      |
| ENSG00000267441 | 5.13E-15 | -2.63127 | 1 | 1 RP1-37N7.5      | _      |
| ENSG00000267443 | 5.13E-15 | -2.63127 | 1 | 1 AC010641.1      | _      |
| ENSG00000267444 | 5.13E-15 | -2.63127 | 1 | 1 SMUG1P1         | K10800 |
| ENSG00000267446 | 5.13E-15 | -2.63127 | 1 | 1 CTB-39G8.2      | _      |
| ENSG00000267447 | 5.13E-15 | -2.63127 | 1 | 1 VN2R11P         | _      |
| ENSG00000267448 | 5.13E-15 | -2.63127 | 1 | 1 AC010649.1      | _      |
| ENSG00000267449 | 5.13E-15 | -2.63127 | 1 | 1 RP11-264B14.2   | _      |
| ENSG00000267450 | 5.13E-15 | -2.63127 | 1 | 1 OR1AB1P         | K04257 |

|                 |          |          |   |                  |        |
|-----------------|----------|----------|---|------------------|--------|
| ENSG00000267452 | 5.13E-15 | -2.63127 | 1 | 1 RP11-1018N14.5 | --     |
| ENSG00000267453 | 5.13E-15 | -2.63127 | 1 | 1 AC004791.2     | --     |
| ENSG00000267456 | 5.13E-15 | -2.63127 | 1 | 1 RP11-49I11.3   | --     |
| ENSG00000267458 | 5.13E-15 | -2.63127 | 1 | 1 CTC-425F1.4    | --     |
| ENSG00000267459 | 5.13E-15 | -2.63127 | 1 | 1 AC006116.27    | K09228 |
| ENSG00000267460 | 5.13E-15 | -2.63127 | 1 | 1 CTB-186H2.1    | --     |
| ENSG00000267461 | 5.13E-15 | -2.63127 | 1 | 1 RP11-120M18.5  | --     |
| ENSG00000267463 | 5.13E-15 | -2.63127 | 1 | 1 UBE2V2P2       | --     |
| ENSG00000267465 | 5.13E-15 | -2.63127 | 1 | 1 AC011525.4     | --     |
| ENSG00000267466 | 5.13E-15 | -2.63127 | 1 | 1 RP11-13K12.5   | --     |
| ENSG00000267467 | 5.13E-15 | -2.63127 | 1 | 1 APOC4          | K09228 |
| ENSG00000267469 | 5.13E-15 | -2.63127 | 1 | 1 AC005944.2     | --     |
| ENSG00000267471 | 5.13E-15 | -2.63127 | 1 | 1 RP11-1058G23.1 | --     |
| ENSG00000267472 | 5.13E-15 | -2.63127 | 1 | 1 LOC440461      | --     |
| ENSG00000267477 | 5.13E-15 | -2.63127 | 1 | 1 CTC-398G3.6    | K13208 |
| ENSG00000267478 | 5.13E-15 | -2.63127 | 1 | 1 RP11-815J4.5   | K04469 |
| ENSG00000267479 | 5.13E-15 | -2.63127 | 1 | 1 CTC-268N12.3   | --     |
| ENSG00000267482 | 5.13E-15 | -2.63127 | 1 | 1 RNY4P13        | --     |
| ENSG00000267484 | 5.13E-15 | -2.63127 | 1 | 1 CTC-518P12.6   | --     |
| ENSG00000267486 | 5.13E-15 | -2.63127 | 1 | 1 GLUD1P4        | K00261 |
| ENSG00000267487 | 5.13E-15 | -2.63127 | 1 | 1 RP11-640A1.4   | --     |
| ENSG00000267488 | 5.13E-15 | -2.63127 | 1 | 1 AC131056.3     | --     |
| ENSG00000267489 | 5.13E-15 | -2.63127 | 1 | 1 CTC-360P9.4    | --     |
| ENSG00000267490 | 5.13E-15 | -2.63127 | 1 | 1 CTD-3116E22.6  | K09228 |
| ENSG00000267492 | 5.13E-15 | -2.63127 | 1 | 1 RP1-37N7.6     | --     |
| ENSG00000267496 | 5.13E-15 | -2.63127 | 1 | 1 FAM215A        | --     |
| ENSG00000267497 | 5.13E-15 | -2.63127 | 1 | 1 NFE2L3P1       | K09040 |
| ENSG00000267499 | 5.13E-15 | -2.63127 | 1 | 1 CTD-3194G12.1  | --     |
| ENSG00000267502 | 5.13E-15 | -2.63127 | 1 | 1 CTC-550B14.8   | --     |
| ENSG00000267503 | 5.13E-15 | -2.63127 | 1 | 1 RP11-53B2.4    | --     |
| ENSG00000267506 | 5.13E-15 | -2.63127 | 1 | 1 RP11-13K12.1   | --     |
| ENSG00000267508 | 5.13E-15 | -2.63127 | 1 | 1 ZNF285         | K09228 |
| ENSG00000267509 | 5.13E-15 | -2.63127 | 1 | 1 CTD-2043I16.1  | --     |
| ENSG00000267511 | 5.13E-15 | -2.63127 | 1 | 1 ADAD1P2        | --     |
| ENSG00000267512 | 5.13E-15 | -2.63127 | 1 | 1 CTC-250I14.3   | --     |
| ENSG00000267513 | 5.13E-15 | -2.63127 | 1 | 1 RP11-622J9.1   | --     |
| ENSG00000267515 | 5.13E-15 | -2.63127 | 1 | 1 RP11-861E21.3  | K11296 |
| ENSG00000267517 | 5.13E-15 | -2.63127 | 1 | 1 CTD-2231E14.4  | --     |
| ENSG00000267520 | 5.13E-15 | -2.63127 | 1 | 1 RP11-373L24.1  | --     |
| ENSG00000267521 | 5.13E-15 | -2.63127 | 1 | 1 RP11-87G24.6   | --     |
| ENSG00000267522 | 5.13E-15 | -2.63127 | 1 | 1 CTD-2621I17.6  | --     |
| ENSG00000267524 | 5.13E-15 | -2.63127 | 1 | 1 RPSAP57        | K02998 |
| ENSG00000267526 | 5.13E-15 | -2.63127 | 1 | 1 RP11-178C3.6   | K00710 |
| ENSG00000267528 | 5.13E-15 | -2.63127 | 1 | 1 AC011524.1     | --     |
| ENSG00000267529 | 5.13E-15 | -2.63127 | 1 | 1 RP11-53B2.1    | --     |
| ENSG00000267531 | 5.13E-15 | -2.63127 | 1 | 1 AC020922.1     | K11429 |
| ENSG00000267535 | 5.13E-15 | -2.63127 | 1 | 1 LINC00868      | --     |
| ENSG00000267537 | 5.13E-15 | -2.63127 | 1 | 1 AC005394.1     | --     |
| ENSG00000267542 | 5.13E-15 | -2.63127 | 1 | 1 RP11-697E22.1  | --     |
| ENSG00000267550 | 5.13E-15 | -2.63127 | 1 | 1 CTC-482H14.5   | --     |
| ENSG00000267552 | 5.13E-15 | -2.63127 | 1 | 1 CTD-2528L19.4  | K09228 |
| ENSG00000267554 | 5.13E-15 | -2.63127 | 1 | 1 RP11-686D22.10 | --     |
| ENSG00000267555 | 5.13E-15 | -2.63127 | 1 | 1 CTD-2085J24.3  | --     |
| ENSG00000267558 | 5.13E-15 | -2.63127 | 1 | 1 RP11-618K16.4  | K02974 |
| ENSG00000267559 | 5.13E-15 | -2.63127 | 1 | 1 RP11-383M4.6   | --     |
| ENSG00000267563 | 5.13E-15 | -2.63127 | 1 | 1 CTC-503J8.4    | --     |
| ENSG00000267564 | 5.13E-15 | -2.63127 | 1 | 1 RP11-128P17.3  | --     |
| ENSG00000267565 | 5.13E-15 | -2.63127 | 1 | 1 CTC-559E9.8    | --     |

|                 |          |          |   |                   |        |
|-----------------|----------|----------|---|-------------------|--------|
| ENSG00000267566 | 5.13E-15 | -2.63127 | 1 | 1 RP11-104J23.1   | -      |
| ENSG00000267570 | 5.13E-15 | -2.63127 | 1 | 1 RP11-773H22.1   | -      |
| ENSG00000267574 | 5.13E-15 | -2.63127 | 1 | 1 CTC-525D6.5     | -      |
| ENSG00000267576 | 5.13E-15 | -2.63127 | 1 | 1 CTC-510F12.6    | -      |
| ENSG00000267578 | 5.13E-15 | -2.63127 | 1 | 1 AC015849.12     | -      |
| ENSG00000267579 | 5.13E-15 | -2.63127 | 1 | 1 RP11-126O1.2    | -      |
| ENSG00000267580 | 5.13E-15 | -2.63127 | 1 | 1 CTD-2540B15.11  | -      |
| ENSG00000267581 | 5.13E-15 | -2.63127 | 1 | 1 CTC-559E9.4     | -      |
| ENSG00000267585 | 5.13E-15 | -2.63127 | 1 | 1 RP11-115P21.1   | K02865 |
| ENSG00000267586 | 5.13E-15 | -2.63127 | 1 | 1 LINC00907       | -      |
| ENSG00000267588 | 5.13E-15 | -2.63127 | 1 | 1 MIR1302-2       | -      |
| ENSG00000267589 | 5.13E-15 | -2.63127 | 1 | 1 CTC-232P5.4     | K02912 |
| ENSG00000267590 | 5.13E-15 | -2.63127 | 1 | 1 NDUFA3P1        | K03947 |
| ENSG00000267591 | 5.13E-15 | -2.63127 | 1 | 1 RP11-689E3.2    | -      |
| ENSG00000267592 | 5.13E-15 | -2.63127 | 1 | 1 CTC-507E2.2     | -      |
| ENSG00000267593 | 5.13E-15 | -2.63127 | 1 | 1 RP11-108P20.4   | -      |
| ENSG00000267594 | 5.13E-15 | -2.63127 | 1 | 1 CYP4F24P        | K17730 |
| ENSG00000267596 | 5.13E-15 | -2.63127 | 1 | 1 CCL15           | K05511 |
| ENSG00000267597 | 5.13E-15 | -2.63127 | 1 | 1 RPIAP1          | K01807 |
| ENSG00000267598 | 5.13E-15 | -2.63127 | 1 | 1 CTC-250I14.6    | -      |
| ENSG00000267599 | 5.13E-15 | -2.63127 | 1 | 1 CTD-2050I18.2   | -      |
| ENSG00000267600 | 5.13E-15 | -2.63127 | 1 | 1 AC098474.1      | -      |
| ENSG00000267601 | 5.13E-15 | -2.63127 | 1 | 1 RP11-323N12.5   | -      |
| ENSG00000267603 | 5.13E-15 | -2.63127 | 1 | 1 LINC01028       | -      |
| ENSG00000267604 | 5.13E-15 | -2.63127 | 1 | 1 RP5-905N1.2     | -      |
| ENSG00000267606 | 5.13E-15 | -2.63127 | 1 | 1 AC006116.21     | -      |
| ENSG00000267609 | 5.13E-15 | -2.63127 | 1 | 1 SNX33P1         | -      |
| ENSG00000267610 | 5.13E-15 | -2.63127 | 1 | 1 AC007787.2      | -      |
| ENSG00000267611 | 5.13E-15 | -2.63127 | 1 | 1 CTC-461H2.2     | K02537 |
| ENSG00000267612 | 5.13E-15 | -2.63127 | 1 | 1 CTD-3116E22.7   | -      |
| ENSG00000267613 | 5.13E-15 | -2.63127 | 1 | 1 RP11-378E13.4   | -      |
| ENSG00000267615 | 5.13E-15 | -2.63127 | 1 | 1 RP11-552F3.13   | -      |
| ENSG00000267616 | 5.13E-15 | -2.63127 | 1 | 1 AC016626.2      | -      |
| ENSG00000267617 | 5.13E-15 | -2.63127 | 1 | 1 AC007795.1      | -      |
| ENSG00000267618 | 5.13E-15 | -2.63127 | 1 | 1 RAD51L3-RFFL    | K10871 |
| ENSG00000267623 | 5.13E-15 | -2.63127 | 1 | 1 AC022153.1      | -      |
| ENSG00000267624 | 5.13E-15 | -2.63127 | 1 | 1 RP11-219G17.6   | K15149 |
| ENSG00000267625 | 5.13E-15 | -2.63127 | 1 | 1 RP11-1094M14.14 | -      |
| ENSG00000267626 | 5.13E-15 | -2.63127 | 1 | 1 AC002115.9      | -      |
| ENSG00000267627 | 5.13E-15 | -2.63127 | 1 | 1 RP11-905K4.1    | -      |
| ENSG00000267628 | 5.13E-15 | -2.63127 | 1 | 1 RP11-1136J12.1  | -      |
| ENSG00000267629 | 5.13E-15 | -2.63127 | 1 | 1 AC138430.4      | -      |
| ENSG00000267630 | 5.13E-15 | -2.63127 | 1 | 1 AC005758.1      | K14802 |
| ENSG00000267631 | 5.13E-15 | -2.63127 | 1 | 1 CGB1            | K10045 |
| ENSG00000267634 | 5.13E-15 | -2.63127 | 1 | 1 RPL7L1P5        | -      |
| ENSG00000267636 | 5.13E-15 | -2.63127 | 1 | 1 AC008992.1      | -      |
| ENSG00000267638 | 5.13E-15 | -2.63127 | 1 | 1 RP11-546M21.6   | -      |
| ENSG00000267639 | 5.13E-15 | -2.63127 | 1 | 1 CICP19          | K16941 |
| ENSG00000267640 | 5.13E-15 | -2.63127 | 1 | 1 CTD-2554C21.2   | -      |
| ENSG00000267641 | 5.13E-15 | -2.63127 | 1 | 1 CTC-260E6.8     | -      |
| ENSG00000267642 | 5.13E-15 | -2.63127 | 1 | 1 RP11-258B16.1   | -      |
| ENSG00000267643 | 5.13E-15 | -2.63127 | 1 | 1 RP11-64C12.4    | -      |
| ENSG00000267644 | 5.13E-15 | -2.63127 | 1 | 1 CTD-2008P7.10   | -      |
| ENSG00000267646 | 5.13E-15 | -2.63127 | 1 | 1 CTC-499B15.7    | -      |
| ENSG00000267650 | 5.13E-15 | -2.63127 | 1 | 1 CTD-2553C6.1    | -      |
| ENSG00000267651 | 5.13E-15 | -2.63127 | 1 | 1 RP11-95O2.1     | -      |
| ENSG00000267652 | 5.13E-15 | -2.63127 | 1 | 1 RP11-188I24.1   | K11276 |
| ENSG00000267656 | 5.13E-15 | -2.63127 | 1 | 1 RP11-807E13.3   | K14815 |

|                 |          |          |   |                  |        |
|-----------------|----------|----------|---|------------------|--------|
| ENSG00000267658 | 5.13E-15 | -2.63127 | 1 | 1 RP11-358B23.1  | -      |
| ENSG00000267660 | 5.13E-15 | -2.63127 | 1 | 1 CTC-479C5.17   | -      |
| ENSG00000267661 | 5.13E-15 | -2.63127 | 1 | 1 RP11-820I16.2  | K02969 |
| ENSG00000267662 | 5.13E-15 | -2.63127 | 1 | 1 AC007796.1     | -      |
| ENSG00000267663 | 5.13E-15 | -2.63127 | 1 | 1 RP11-64C12.9   | K03767 |
| ENSG00000267664 | 5.13E-15 | -2.63127 | 1 | 1 RPL17P45       | K02880 |
| ENSG00000267665 | 5.13E-15 | -2.63127 | 1 | 1 RP11-13K12.2   | -      |
| ENSG00000267667 | 5.13E-15 | -2.63127 | 1 | 1 RP11-136H19.1  | -      |
| ENSG00000267668 | 5.13E-15 | -2.63127 | 1 | 1 RP11-697E22.2  | -      |
| ENSG00000267669 | 5.13E-15 | -2.63127 | 1 | 1 RP11-824M15.3  | K02941 |
| ENSG00000267670 | 5.13E-15 | -2.63127 | 1 | 1 CTB-55O6.4     | -      |
| ENSG00000267671 | 5.13E-15 | -2.63127 | 1 | 1 YWHAEP7        | K06630 |
| ENSG00000267672 | 5.13E-15 | -2.63127 | 1 | 1 CTD-2293H3.1   | -      |
| ENSG00000267674 | 5.13E-15 | -2.63127 | 1 | 1 RP11-813F20.2  | -      |
| ENSG00000267675 | 5.13E-15 | -2.63127 | 1 | 1 RP11-1151B14.2 | -      |
| ENSG00000267678 | 5.13E-15 | -2.63127 | 1 | 1 RP11-15E18.3   | K06840 |
| ENSG00000267679 | 5.13E-15 | -2.63127 | 1 | 1 EIF5AP2        | K03263 |
| ENSG00000267682 | 5.13E-15 | -2.63127 | 1 | 1 CTD-3220F14.2  | -      |
| ENSG00000267683 | 5.13E-15 | -2.63127 | 1 | 1 AC008991.1     | -      |
| ENSG00000267684 | 5.13E-15 | -2.63127 | 1 | 1 CTC-360P9.2    | -      |
| ENSG00000267685 | 5.13E-15 | -2.63127 | 1 | 1 NTF6B          | K12457 |
| ENSG00000267686 | 5.13E-15 | -2.63127 | 1 | 1 RP11-795H16.3  | -      |
| ENSG00000267687 | 5.13E-15 | -2.63127 | 1 | 1 RP11-325K19.6  | -      |
| ENSG00000267688 | 5.13E-15 | -2.63127 | 1 | 1 AC005262.2     | -      |
| ENSG00000267689 | 5.13E-15 | -2.63127 | 1 | 1 AC010525.5     | K07766 |
| ENSG00000267690 | 5.13E-15 | -2.63127 | 1 | 1 LDLRAD4-AS1    | -      |
| ENSG00000267691 | 5.13E-15 | -2.63127 | 1 | 1 SHC1P2         | K06279 |
| ENSG00000267693 | 5.13E-15 | -2.63127 | 1 | 1 CTC-559E9.2    | -      |
| ENSG00000267694 | 5.13E-15 | -2.63127 | 1 | 1 RP11-691H4.4   | -      |
| ENSG00000267695 | 5.13E-15 | -2.63127 | 1 | 1 RP11-1030E3.1  | -      |
| ENSG00000267696 | 5.13E-15 | -2.63127 | 1 | 1 CTB-151G24.1   | -      |
| ENSG00000267697 | 5.13E-15 | -2.63127 | 1 | 1 LUZP6          | -      |
| ENSG00000267699 | 5.13E-15 | -2.63127 | 1 | 1 RP11-729L2.2   | K00784 |
| ENSG00000267702 | 5.13E-15 | -2.63127 | 1 | 1 RP11-53B2.2    | -      |
| ENSG00000267704 | 5.13E-15 | -2.63127 | 1 | 1 RP11-411B10.6  | -      |
| ENSG00000267705 | 5.13E-15 | -2.63127 | 1 | 1 RP11-108P20.3  | -      |
| ENSG00000267707 | 5.13E-15 | -2.63127 | 1 | 1 RP11-95O2.5    | -      |
| ENSG00000267708 | 5.13E-15 | -2.63127 | 1 | 1 RP11-147L13.7  | K10874 |
| ENSG00000267709 | 5.13E-15 | -2.63127 | 1 | 1 AC024592.9     | -      |
| ENSG00000267712 | 5.13E-15 | -2.63127 | 1 | 1 RP11-456O19.4  | -      |
| ENSG00000267713 | 5.13E-15 | -2.63127 | 1 | 1 RP11-10I6.2    | -      |
| ENSG00000267714 | 5.13E-15 | -2.63127 | 1 | 1 CTD-2540B15.6  | -      |
| ENSG00000267716 | 5.13E-15 | -2.63127 | 1 | 1 AC083760.1     | -      |
| ENSG00000267717 | 5.13E-15 | -2.63127 | 1 | 1 SRSF10P1       | K12900 |
| ENSG00000267722 | 5.13E-15 | -2.63127 | 1 | 1 RP11-815J4.1   | -      |
| ENSG00000267723 | 5.13E-15 | -2.63127 | 1 | 1 CTD-2189E23.1  | -      |
| ENSG00000267725 | 5.13E-15 | -2.63127 | 1 | 1 CTC-461H2.3    | -      |
| ENSG00000267726 | 5.13E-15 | -2.63127 | 1 | 1 CTD-2526M8.2   | -      |
| ENSG00000267727 | 5.13E-15 | -2.63127 | 1 | 1 CTD-2540B15.7  | -      |
| ENSG00000267731 | 5.13E-15 | -2.63127 | 1 | 1 RP11-147L13.8  | -      |
| ENSG00000267732 | 5.13E-15 | -2.63127 | 1 | 1 RP11-456O19.3  | -      |
| ENSG00000267733 | 5.13E-15 | -2.63127 | 1 | 1 RP11-64C12.3   | -      |
| ENSG00000267734 | 5.13E-15 | -2.63127 | 1 | 1 RP4-604K5.3    | -      |
| ENSG00000267736 | 5.13E-15 | -2.63127 | 1 | 1 HMGB2P1        | K11295 |
| ENSG00000267740 | 5.13E-15 | -2.63127 | 1 | 1 AC024592.12    | K03956 |
| ENSG00000267746 | 5.13E-15 | -2.63127 | 1 | 1 RP11-379L18.1  | -      |
| ENSG00000267748 | 5.13E-15 | -2.63127 | 1 | 1 CTB-102L5.4    | -      |
| ENSG00000267749 | 5.13E-15 | -2.63127 | 1 | 1 CTC-265F19.1   | -      |



|                 |          |          |   |                 |        |
|-----------------|----------|----------|---|-----------------|--------|
| ENSG00000267752 | 5.13E-15 | -2.63127 | 1 | 1 RPS10P27      | K02947 |
| ENSG00000267755 | 5.13E-15 | -2.63127 | 1 | 1 AC004623.2    | -      |
| ENSG00000267756 | 5.13E-15 | -2.63127 | 1 | 1 RP11-411B10.4 | K04614 |
| ENSG00000267760 | 5.13E-15 | -2.63127 | 1 | 1 CTC-565M22.1  | -      |
| ENSG00000267761 | 5.13E-15 | -2.63127 | 1 | 1 CTD-2130O13.1 | -      |
| ENSG00000267762 | 5.13E-15 | -2.63127 | 1 | 1 RP11-426J5.2  | -      |
| ENSG00000267764 | 5.13E-15 | -2.63127 | 1 | 1 RP11-484L8.1  | -      |
| ENSG00000267766 | 5.13E-15 | -2.63127 | 1 | 1 RP11-299P2.1  | -      |
| ENSG00000267767 | 5.13E-15 | -2.63127 | 1 | 1 CTC-523E23.4  | -      |
| ENSG00000267768 | 5.13E-15 | -2.63127 | 1 | 1 CTC-459F4.8   | K11840 |
| ENSG00000267770 | 5.13E-15 | -2.63127 | 1 | 1 RP11-559N14.6 | K15306 |
| ENSG00000267771 | 5.13E-15 | -2.63127 | 1 | 1 CTC-260E6.7   | K09228 |
| ENSG00000267772 | 5.13E-15 | -2.63127 | 1 | 1 RP11-15E18.4  | -      |
| ENSG00000267773 | 5.13E-15 | -2.63127 | 1 | 1 RP11-677O4.4  | -      |
| ENSG00000267774 | 5.13E-15 | -2.63127 | 1 | 1 RP11-2N1.2    | -      |
| ENSG00000267775 | 5.13E-15 | -2.63127 | 1 | 1 OR7E16P       | K04257 |
| ENSG00000267776 | 5.13E-15 | -2.63127 | 1 | 1 AC006116.24   | -      |
| ENSG00000267777 | 5.13E-15 | -2.63127 | 1 | 1 CTC-439O9.3   | -      |
| ENSG00000267779 | 5.13E-15 | -2.63127 | 1 | 1 CTC-360P9.3   | -      |
| ENSG00000267781 | 5.13E-15 | -2.63127 | 1 | 1 SLC25A36P1    | -      |
| ENSG00000267782 | 5.13E-15 | -2.63127 | 1 | 1 RP11-799D4.3  | -      |
| ENSG00000267783 | 5.13E-15 | -2.63127 | 1 | 1 CTB-55O6.10   | -      |
| ENSG00000267784 | 5.13E-15 | -2.63127 | 1 | 1 RP11-171I2.1  | -      |
| ENSG00000267785 | 5.13E-15 | -2.63127 | 1 | 1 CTD-3194G12.2 | -      |
| ENSG00000267787 | 5.13E-15 | -2.63127 | 1 | 1 RP11-35G9.5   | -      |
| ENSG00000267789 | 5.13E-15 | -2.63127 | 1 | 1 CTD-2526M8.3  | -      |
| ENSG00000267790 | 5.13E-15 | -2.63127 | 1 | 1 RP11-316M20.1 | -      |
| ENSG00000267791 | 5.13E-15 | -2.63127 | 1 | 1 CTD-2659N19.2 | -      |
| ENSG00000267792 | 5.13E-15 | -2.63127 | 1 | 1 AC016626.1    | -      |
| ENSG00000267793 | 5.13E-15 | -2.63127 | 1 | 1 RP11-576C2.1  | -      |
| ENSG00000267794 | 5.13E-15 | -2.63127 | 1 | 1 RP11-677O4.5  | K01047 |
| ENSG00000267797 | 5.13E-15 | -2.63127 | 1 | 1 NRBF2P1       | -      |
| ENSG00000267799 | 5.13E-15 | -2.63127 | 1 | 1 CTC-478M6.1   | K01230 |
| ENSG00000267802 | 5.13E-15 | -2.63127 | 1 | 1 AL358333.1    | -      |
| ENSG00000267808 | 5.13E-15 | -2.63127 | 1 | 1 AC018755.17   | -      |
| ENSG00000267812 | 5.13E-15 | -2.63127 | 1 | 1 FKSG68        | -      |
| ENSG00000267815 | 5.13E-15 | -2.63127 | 1 | 1 CTB-191K22.5  | -      |
| ENSG00000267819 | 5.13E-15 | -2.63127 | 1 | 1 AC092850.1    | -      |
| ENSG00000267824 | 5.13E-15 | -2.63127 | 1 | 1 AC137056.1    | K06125 |
| ENSG00000267827 | 5.13E-15 | -2.63127 | 1 | 1 CTC-471J1.8   | -      |
| ENSG00000267838 | 5.13E-15 | -2.63127 | 1 | 1 AC008746.12   | -      |
| ENSG00000267839 | 5.13E-15 | -2.63127 | 1 | 1 AC020956.3    | -      |
| ENSG00000267845 | 5.13E-15 | -2.63127 | 1 | 1 DKFZP434A062  | -      |
| ENSG00000267849 | 5.13E-15 | -2.63127 | 1 | 1 AL133262.1    | -      |
| ENSG00000267865 | 5.13E-15 | -2.63127 | 1 | 1 CTD-2611O12.8 | -      |
| ENSG00000267872 | 5.13E-15 | -2.63127 | 1 | 1 RP11-157B13.7 | -      |
| ENSG00000267873 | 5.13E-15 | -2.63127 | 1 | 1 AC121757.1    | -      |
| ENSG00000267879 | 5.13E-15 | -2.63127 | 1 | 1 CTB-147C22.9  | -      |
| ENSG00000267880 | 5.13E-15 | -2.63127 | 1 | 1 AC037199.1    | K01325 |
| ENSG00000267881 | 5.13E-15 | -2.63127 | 1 | 1 CEA           | K06499 |
| ENSG00000267882 | 5.13E-15 | -2.63127 | 1 | 1 AL031666.2    | K17985 |
| ENSG00000267883 | 5.13E-15 | -2.63127 | 1 | 1 PRED60        | -      |
| ENSG00000267884 | 5.13E-15 | -2.63127 | 1 | 1 AL626787.1    | -      |
| ENSG00000267886 | 5.13E-15 | -2.63127 | 1 | 1 CTD-2291D10.4 | -      |
| ENSG00000267890 | 5.13E-15 | -2.63127 | 1 | 1 CTD-2126E3.4  | -      |
| ENSG00000267893 | 5.13E-15 | -2.63127 | 1 | 1 AC007461.1    | -      |
| ENSG00000267895 | 5.13E-15 | -2.63127 | 1 | 1 SIGLEC19P     | K06739 |
| ENSG00000267901 | 5.13E-15 | -2.63127 | 1 | 1 AC004817.1    | -      |

|                 |          |          |   |                  |        |
|-----------------|----------|----------|---|------------------|--------|
| ENSG00000267906 | 5.13E-15 | -2.63127 | 1 | 1 AC073333.1     | -      |
| ENSG00000267908 | 5.13E-15 | -2.63127 | 1 | 1 ZSCAN5D        | K09230 |
| ENSG00000267918 | 5.13E-15 | -2.63127 | 1 | 1 AL117190.2     | -      |
| ENSG00000267919 | 5.13E-15 | -2.63127 | 1 | 1 RP11-256I23.3  | -      |
| ENSG00000267920 | 5.13E-15 | -2.63127 | 1 | 1 SNX6P1         | K17920 |
| ENSG00000267924 | 5.13E-15 | -2.63127 | 1 | 1 RP11-255H23.4  | -      |
| ENSG00000267927 | 5.13E-15 | -2.63127 | 1 | 1 CTD-2525I3.2   | -      |
| ENSG00000267935 | 5.13E-15 | -2.63127 | 1 | 1 AC016752.1     | -      |
| ENSG00000267937 | 5.13E-15 | -2.63127 | 1 | 1 AP001421.1     | -      |
| ENSG00000267941 | 5.13E-15 | -2.63127 | 1 | 1 AC008267.1     | K01557 |
| ENSG00000267942 | 5.13E-15 | -2.63127 | 1 | 1 AC090673.2     | K09488 |
| ENSG00000267943 | 5.13E-15 | -2.63127 | 1 | 1 CTD-2620I22.3  | -      |
| ENSG00000267950 | 5.13E-15 | -2.63127 | 1 | 1 AC136297.1     | -      |
| ENSG00000267952 | 5.13E-15 | -2.63127 | 1 | 1 CTD-2207O23.12 | -      |
| ENSG00000267954 | 5.13E-15 | -2.63127 | 1 | 1 AP000349.1     | K07993 |
| ENSG00000267958 | 5.13E-15 | -2.63127 | 1 | 1 CATX-2         | -      |
| ENSG00000267961 | 5.13E-15 | -2.63127 | 1 | 1 OR10B1P        | K04257 |
| ENSG00000267963 | 5.13E-15 | -2.63127 | 1 | 1 AC013469.1     | -      |
| ENSG00000267968 | 5.13E-15 | -2.63127 | 1 | 1 AC011523.2     | -      |
| ENSG00000267970 | 5.13E-15 | -2.63127 | 1 | 1 AC004899.1     | K06639 |
| ENSG00000267979 | 5.13E-15 | -2.63127 | 1 | 1 AC092964.2     | -      |
| ENSG00000267981 | 5.13E-15 | -2.63127 | 1 | 1 AP003041.2     | K17985 |
| ENSG00000267984 | 5.13E-15 | -2.63127 | 1 | 1 CTD-2616J11.9  | -      |
| ENSG00000267985 | 5.13E-15 | -2.63127 | 1 | 1 AC005488.1     | -      |
| ENSG00000267986 | 5.13E-15 | -2.63127 | 1 | 1 AC130469.2     | -      |
| ENSG00000267987 | 5.13E-15 | -2.63127 | 1 | 1 AL161784.1     | K17286 |
| ENSG00000267988 | 5.13E-15 | -2.63127 | 1 | 1 AC096582.1     | -      |
| ENSG00000267990 | 5.13E-15 | -2.63127 | 1 | 1 CTD-3187F8.15  | K10079 |
| ENSG00000268000 | 5.13E-15 | -2.63127 | 1 | 1 hsa-mir-150    | -      |
| ENSG00000268012 | 5.13E-15 | -2.63127 | 1 | 1 AC016559.1     | -      |
| ENSG00000268020 | 5.13E-15 | -2.63127 | 1 | 1 OR4G4P         | -      |
| ENSG00000268024 | 5.13E-15 | -2.63127 | 1 | 1 AC005549.3     | -      |
| ENSG00000268027 | 5.13E-15 | -2.63127 | 1 | 1 AC006129.2     | -      |
| ENSG00000268028 | 5.13E-15 | -2.63127 | 1 | 1 AC025262.1     | -      |
| ENSG00000268036 | 5.13E-15 | -2.63127 | 1 | 1 AC007228.8     | K09228 |
| ENSG00000268038 | 5.13E-15 | -2.63127 | 1 | 1 AC011516.2     | -      |
| ENSG00000268040 | 5.13E-15 | -2.63127 | 1 | 1 PRED62         | -      |
| ENSG00000268046 | 5.13E-15 | -2.63127 | 1 | 1 AP001094.1     | K09131 |
| ENSG00000268050 | 5.13E-15 | -2.63127 | 1 | 1 RP11-247A12.8  | -      |
| ENSG00000268051 | 5.13E-15 | -2.63127 | 1 | 1 CTC-244M17.1   | -      |
| ENSG00000268053 | 5.13E-15 | -2.63127 | 1 | 1 CTC-344H19.6   | K14692 |
| ENSG00000268055 | 5.13E-15 | -2.63127 | 1 | 1 AC067969.2     | -      |
| ENSG00000268056 | 5.13E-15 | -2.63127 | 1 | 1 CTD-3032J10.2  | -      |
| ENSG00000268062 | 5.13E-15 | -2.63127 | 1 | 1 TOP1P1         | K03104 |
| ENSG00000268066 | 5.13E-15 | -2.63127 | 1 | 1 FMR1-AS1       | -      |
| ENSG00000268067 | 5.13E-15 | -2.63127 | 1 | 1 OR5AH1P        | K04257 |
| ENSG00000268070 | 5.13E-15 | -2.63127 | 1 | 1 AC006539.3     | K15464 |
| ENSG00000268074 | 5.13E-15 | -2.63127 | 1 | 1 RP5-998N21.8   | K02891 |
| ENSG00000268078 | 5.13E-15 | -2.63127 | 1 | 1 RP11-805I24.4  | -      |
| ENSG00000268079 | 5.13E-15 | -2.63127 | 1 | 1 RP11-157B13.6  | -      |
| ENSG00000268080 | 5.13E-15 | -2.63127 | 1 | 1 AC016885.1     | -      |
| ENSG00000268081 | 5.13E-15 | -2.63127 | 1 | 1 RP11-678G14.2  | -      |
| ENSG00000268083 | 5.13E-15 | -2.63127 | 1 | 1 AC104534.3     | K13159 |
| ENSG00000268085 | 5.13E-15 | -2.63127 | 1 | 1 AC051642.1     | -      |
| ENSG00000268088 | 5.13E-15 | -2.63127 | 1 | 1 AC093063.2     | K13334 |
| ENSG00000268091 | 5.13E-15 | -2.63127 | 1 | 1 AC078925.1     | -      |
| ENSG00000268095 | 5.13E-15 | -2.63127 | 1 | 1 CTC-429C10.2   | -      |
| ENSG00000268100 | 5.13E-15 | -2.63127 | 1 | 1 ZNF725P        | K09228 |

|                 |          |          |   |                  |        |
|-----------------|----------|----------|---|------------------|--------|
| ENSG00000268101 | 5.13E-15 | -2.63127 | 1 | 1 CYP2G2P        | K07417 |
| ENSG00000268105 | 5.13E-15 | -2.63127 | 1 | 1 RP11-369G6.2   | K02932 |
| ENSG00000268107 | 5.13E-15 | -2.63127 | 1 | 1 AC003005.4     | K09228 |
| ENSG00000268108 | 5.13E-15 | -2.63127 | 1 | 1 CTB-60B18.12   | -      |
| ENSG00000268111 | 5.13E-15 | -2.63127 | 1 | 1 AL031663.1     | -      |
| ENSG00000268112 | 5.13E-15 | -2.63127 | 1 | 1 CTD-3149D2.4   | -      |
| ENSG00000268116 | 5.13E-15 | -2.63127 | 1 | 1 RP11-157B13.1  | K02880 |
| ENSG00000268117 | 5.13E-15 | -2.63127 | 1 | 1 VN1R84P        | -      |
| ENSG00000268119 | 5.13E-15 | -2.63127 | 1 | 1 CTD-2561J22.5  | -      |
| ENSG00000268120 | 5.13E-15 | -2.63127 | 1 | 1 CTD-3193O13.11 | -      |
| ENSG00000268126 | 5.13E-15 | -2.63127 | 1 | 1 AC091948.1     | -      |
| ENSG00000268130 | 5.13E-15 | -2.63127 | 1 | 1 AL137002.1     | -      |
| ENSG00000268133 | 5.13E-15 | -2.63127 | 1 | 1 AC003002.4     | K09228 |
| ENSG00000268140 | 5.13E-15 | -2.63127 | 1 | 1 PCGF7P         | K11470 |
| ENSG00000268141 | 5.13E-15 | -2.63127 | 1 | 1 AL606500.1     | -      |
| ENSG00000268144 | 5.13E-15 | -2.63127 | 1 | 1 NIFKP6         | K14838 |
| ENSG00000268146 | 5.13E-15 | -2.63127 | 1 | 1 AL590483.1     | -      |
| ENSG00000268148 | 5.13E-15 | -2.63127 | 1 | 1 VN1R91P        | -      |
| ENSG00000268149 | 5.13E-15 | -2.63127 | 1 | 1 CTD-3193O13.13 | -      |
| ENSG00000268153 | 5.13E-15 | -2.63127 | 1 | 1 AC005176.2     | K17985 |
| ENSG00000268154 | 5.13E-15 | -2.63127 | 1 | 1 AL591806.1     | K17985 |
| ENSG00000268156 | 5.13E-15 | -2.63127 | 1 | 1 FKSG61         | -      |
| ENSG00000268163 | 5.13E-15 | -2.63127 | 1 | 1 AC004076.9     | K09228 |
| ENSG00000268164 | 5.13E-15 | -2.63127 | 1 | 1 CTD-2337J16.1  | -      |
| ENSG00000268170 | 5.13E-15 | -2.63127 | 1 | 1 AC073342.1     | K08474 |
| ENSG00000268171 | 5.13E-15 | -2.63127 | 1 | 1 AC068620.1     | K01587 |
| ENSG00000268172 | 5.13E-15 | -2.63127 | 1 | 1 AL590452.1     | K09228 |
| ENSG00000268174 | 5.13E-15 | -2.63127 | 1 | 1 CTC-513N18.5   | -      |
| ENSG00000268181 | 5.13E-15 | -2.63127 | 1 | 1 AC073188.1     | -      |
| ENSG00000268182 | 5.13E-15 | -2.63127 | 1 | 1 SMIM17         | -      |
| ENSG00000268184 | 5.13E-15 | -2.63127 | 1 | 1 RP11-420K14.8  | -      |
| ENSG00000268186 | 5.13E-15 | -2.63127 | 1 | 1 CTC-241F20.4   | -      |
| ENSG00000268191 | 5.13E-15 | -2.63127 | 1 | 1 CTD-2396E7.10  | -      |
| ENSG00000268192 | 5.13E-15 | -2.63127 | 1 | 1 AP002956.1     | -      |
| ENSG00000268193 | 5.13E-15 | -2.63127 | 1 | 1 AC002985.3     | K17268 |
| ENSG00000268194 | 5.13E-15 | -2.63127 | 1 | 1 LINC01101      | -      |
| ENSG00000268203 | 5.13E-15 | -2.63127 | 1 | 1 CTD-2396E7.9   | -      |
| ENSG00000268206 | 5.13E-15 | -2.63127 | 1 | 1 AC061975.10    | K04482 |
| ENSG00000268208 | 5.13E-15 | -2.63127 | 1 | 1 AC008372.1     | -      |
| ENSG00000268209 | 5.13E-15 | -2.63127 | 1 | 1 RP11-618I10.3  | K00699 |
| ENSG00000268217 | 5.13E-15 | -2.63127 | 1 | 1 AC008387.1     | -      |
| ENSG00000268220 | 5.13E-15 | -2.63127 | 1 | 1 RP11-379K17.12 | -      |
| ENSG00000268222 | 5.13E-15 | -2.63127 | 1 | 1 EEF1A1P7       | K03231 |
| ENSG00000268231 | 5.13E-15 | -2.63127 | 1 | 1 CTD-2560K21.6  | -      |
| ENSG00000268234 | 5.13E-15 | -2.63127 | 1 | 1 AL162415.2     | K09571 |
| ENSG00000268238 | 5.13E-15 | -2.63127 | 1 | 1 IGFL1P2        | -      |
| ENSG00000268240 | 5.13E-15 | -2.63127 | 1 | 1 RP11-678G14.4  | -      |
| ENSG00000268241 | 5.13E-15 | -2.63127 | 1 | 1 AC018470.1     | K09199 |
| ENSG00000268242 | 5.13E-15 | -2.63127 | 1 | 1 AC131935.1     | -      |
| ENSG00000268243 | 5.13E-15 | -2.63127 | 1 | 1 AC005176.3     | -      |
| ENSG00000268257 | 5.13E-15 | -2.63127 | 1 | 1 AIRN           | -      |
| ENSG00000268266 | 5.13E-15 | -2.63127 | 1 | 1 AC003005.2     | -      |
| ENSG00000268267 | 5.13E-15 | -2.63127 | 1 | 1 SIGLEC29P      | K06473 |
| ENSG00000268272 | 5.13E-15 | -2.63127 | 1 | 1 VN1R78P        | K04614 |
| ENSG00000268278 | 5.13E-15 | -2.63127 | 1 | 1 RP11-420K14.1  | K09228 |
| ENSG00000268280 | 5.13E-15 | -2.63127 | 1 | 1 AC008914.1     | K02159 |
| ENSG00000268282 | 5.13E-15 | -2.63127 | 1 | 1 CTD-2620I22.2  | K05757 |
| ENSG00000268287 | 5.13E-15 | -2.63127 | 1 | 1 CTB-60B18.18   | -      |

|                 |          |          |   |                  |        |
|-----------------|----------|----------|---|------------------|--------|
| ENSG00000268289 | 5.13E-15 | -2.63127 | 1 | 1 CTD-2528A14.3  | -      |
| ENSG00000268292 | 5.13E-15 | -2.63127 | 1 | 1 AC006547.15    | -      |
| ENSG00000268293 | 5.13E-15 | -2.63127 | 1 | 1 CTD-2623H2.7   | K11352 |
| ENSG00000268295 | 5.13E-15 | -2.63127 | 1 | 1 RP11-248B24.4  | K03024 |
| ENSG00000268296 | 5.13E-15 | -2.63127 | 1 | 1 CTD-2579N5.3   | -      |
| ENSG00000268301 | 5.13E-15 | -2.63127 | 1 | 1 AC018630.1     | -      |
| ENSG00000268309 | 5.13E-15 | -2.63127 | 1 | 1 CTD-3222D19.11 | -      |
| ENSG00000268313 | 5.13E-15 | -2.63127 | 1 | 1 AC119673.1     | -      |
| ENSG00000268316 | 5.13E-15 | -2.63127 | 1 | 1 AC006272.2     | -      |
| ENSG00000268317 | 5.13E-15 | -2.63127 | 1 | 1 AC026461.1     | -      |
| ENSG00000268318 | 5.13E-15 | -2.63127 | 1 | 1 CTD-3187F8.11  | -      |
| ENSG00000268322 | 5.13E-15 | -2.63127 | 1 | 1 CTD-3030D20.2  | -      |
| ENSG00000268324 | 5.13E-15 | -2.63127 | 1 | 1 LUZPP1         | -      |
| ENSG00000268326 | 5.13E-15 | -2.63127 | 1 | 1 CTD-2542C24.8  | -      |
| ENSG00000268327 | 5.13E-15 | -2.63127 | 1 | 1 C15ORF31       | -      |
| ENSG00000268332 | 5.13E-15 | -2.63127 | 1 | 1 AL035406.1     | K04883 |
| ENSG00000268333 | 5.13E-15 | -2.63127 | 1 | 1 RP4-806M20.3   | -      |
| ENSG00000268335 | 5.13E-15 | -2.63127 | 1 | 1 CTC-513N18.3   | -      |
| ENSG00000268336 | 5.13E-15 | -2.63127 | 1 | 1 SIGLEC20P      | K06748 |
| ENSG00000268341 | 5.13E-15 | -2.63127 | 1 | 1 L47234.1       | -      |
| ENSG00000268342 | 5.13E-15 | -2.63127 | 1 | 1 CTD-2340F8.1   | K09571 |
| ENSG00000268343 | 5.13E-15 | -2.63127 | 1 | 1 AC012414.1     | -      |
| ENSG00000268344 | 5.13E-15 | -2.63127 | 1 | 1 AL138815.2     | -      |
| ENSG00000268351 | 5.13E-15 | -2.63127 | 1 | 1 AP001888.1     | -      |
| ENSG00000268352 | 5.13E-15 | -2.63127 | 1 | 1 AC007228.5     | -      |
| ENSG00000268355 | 5.13E-15 | -2.63127 | 1 | 1 AC006129.1     | -      |
| ENSG00000268361 | 5.13E-15 | -2.63127 | 1 | 1 L34079.2       | K10803 |
| ENSG00000268365 | 5.13E-15 | -2.63127 | 1 | 1 AL646016.1     | -      |
| ENSG00000268375 | 5.13E-15 | -2.63127 | 1 | 1 CTD-2568A17.8  | -      |
| ENSG00000268387 | 5.13E-15 | -2.63127 | 1 | 1 AL590714.1     | K08758 |
| ENSG00000268388 | 5.13E-15 | -2.63127 | 1 | 1 FENDRR         | -      |
| ENSG00000268390 | 5.13E-15 | -2.63127 | 1 | 1 CTC-518B2.10   | -      |
| ENSG00000268391 | 5.13E-15 | -2.63127 | 1 | 1 RP11-241F15.6  | -      |
| ENSG00000268392 | 5.13E-15 | -2.63127 | 1 | 1 AC003682.16    | -      |
| ENSG00000268407 | 5.13E-15 | -2.63127 | 1 | 1 AC006115.6     | K09229 |
| ENSG00000268413 | 5.13E-15 | -2.63127 | 1 | 1 AC003043.1     | -      |
| ENSG00000268416 | 5.13E-15 | -2.63127 | 1 | 1 CTD-2626G11.2  | -      |
| ENSG00000268421 | 5.13E-15 | -2.63127 | 1 | 1 AL355531.2     | -      |
| ENSG00000268424 | 5.13E-15 | -2.63127 | 1 | 1 AC008948.1     | -      |
| ENSG00000268427 | 5.13E-15 | -2.63127 | 1 | 1 AL022328.1     | K06821 |
| ENSG00000268432 | 5.13E-15 | -2.63127 | 1 | 1 AC026407.1     | K10761 |
| ENSG00000268433 | 5.13E-15 | -2.63127 | 1 | 1 RP11-420K14.2  | -      |
| ENSG00000268438 | 5.13E-15 | -2.63127 | 1 | 1 CTD-2607J13.1  | K15464 |
| ENSG00000268442 | 5.13E-15 | -2.63127 | 1 | 1 HAVCR1P1       | -      |
| ENSG00000268455 | 5.13E-15 | -2.63127 | 1 | 1 RP11-359H18.2  | K09228 |
| ENSG00000268458 | 5.13E-15 | -2.63127 | 1 | 1 CTC-471J1.9    | -      |
| ENSG00000268461 | 5.13E-15 | -2.63127 | 1 | 1 AC007204.1     | K09228 |
| ENSG00000268465 | 5.13E-15 | -2.63127 | 1 | 1 CTC-273B12.7   | K18441 |
| ENSG00000268467 | 5.13E-15 | -2.63127 | 1 | 1 AP000889.3     | -      |
| ENSG00000268469 | 5.13E-15 | -2.63127 | 1 | 1 RP11-15H20.3   | -      |
| ENSG00000268472 | 5.13E-15 | -2.63127 | 1 | 1 AP002884.2     | -      |
| ENSG00000268473 | 5.13E-15 | -2.63127 | 1 | 1 RP11-158I3.1   | K05021 |
| ENSG00000268475 | 5.13E-15 | -2.63127 | 1 | 1 CTC-435M10.6   | -      |
| ENSG00000268480 | 5.13E-15 | -2.63127 | 1 | 1 CTD-2586B10.1  | -      |
| ENSG00000268482 | 5.13E-15 | -2.63127 | 1 | 1 AL160274.1     | -      |
| ENSG00000268483 | 5.13E-15 | -2.63127 | 1 | 1 RPL7AP69       | K02936 |
| ENSG00000268484 | 5.13E-15 | -2.63127 | 1 | 1 AC087477.1     | -      |
| ENSG00000268485 | 5.13E-15 | -2.63127 | 1 | 1 AC104841.2     | -      |

|                 |          |          |   |                  |        |
|-----------------|----------|----------|---|------------------|--------|
| ENSG00000268488 | 5.13E-15 | -2.63127 | 1 | 1 AC018512.1     | -      |
| ENSG00000268496 | 5.13E-15 | -2.63127 | 1 | 1 CTD-2587H19.2  | -      |
| ENSG00000268499 | 5.13E-15 | -2.63127 | 1 | 1 CTB-102L5.8    | -      |
| ENSG00000268500 | 5.13E-15 | -2.63127 | 1 | 1 SIGLEC5        | K06549 |
| ENSG00000268503 | 5.13E-15 | -2.63127 | 1 | 1 AC007421.1     | -      |
| ENSG00000268505 | 5.13E-15 | -2.63127 | 1 | 1 RP11-805I24.3  | -      |
| ENSG00000268509 | 5.13E-15 | -2.63127 | 1 | 1 AC026202.1     | K10084 |
| ENSG00000268519 | 5.13E-15 | -2.63127 | 1 | 1 AC073528.1     | -      |
| ENSG00000268525 | 5.13E-15 | -2.63127 | 1 | 1 CTB-59C6.3     | -      |
| ENSG00000268529 | 5.13E-15 | -2.63127 | 1 | 1 CYP2T3P        | K07421 |
| ENSG00000268531 | 5.13E-15 | -2.63127 | 1 | 1 DKFZP547L112   | -      |
| ENSG00000268532 | 5.13E-15 | -2.63127 | 1 | 1 RP11-514D23.1  | -      |
| ENSG00000268533 | 5.13E-15 | -2.63127 | 1 | 1 AC004076.7     | K01623 |
| ENSG00000268535 | 5.13E-15 | -2.63127 | 1 | 1 RP11-420K14.3  | -      |
| ENSG00000268537 | 5.13E-15 | -2.63127 | 1 | 1 AC109583.1     | -      |
| ENSG00000268538 | 5.13E-15 | -2.63127 | 1 | 1 KIAA1658       | -      |
| ENSG00000268541 | 5.13E-15 | -2.63127 | 1 | 1 VN1R88P        | -      |
| ENSG00000268544 | 5.13E-15 | -2.63127 | 1 | 1 RP11-277L2.4   | -      |
| ENSG00000268545 | 5.13E-15 | -2.63127 | 1 | 1 VN1R107P       | K04614 |
| ENSG00000268549 | 5.13E-15 | -2.63127 | 1 | 1 RP11-295P9.8   | -      |
| ENSG00000268552 | 5.13E-15 | -2.63127 | 1 | 1 AL109927.1     | -      |
| ENSG00000268553 | 5.13E-15 | -2.63127 | 1 | 1 AC027309.1     | -      |
| ENSG00000268554 | 5.13E-15 | -2.63127 | 1 | 1 RP11-353N4.7   | -      |
| ENSG00000268555 | 5.13E-15 | -2.63127 | 1 | 1 RP11-678G14.3  | -      |
| ENSG00000268556 | 5.13E-15 | -2.63127 | 1 | 1 AC012360.1     | -      |
| ENSG00000268560 | 5.13E-15 | -2.63127 | 1 | 1 CTD-2332E11.2  | -      |
| ENSG00000268565 | 5.13E-15 | -2.63127 | 1 | 1 AC005339.2     | -      |
| ENSG00000268566 | 5.13E-15 | -2.63127 | 1 | 1 RP11-687D19.1  | -      |
| ENSG00000268580 | 5.13E-15 | -2.63127 | 1 | 1 RP11-514A9.1   | -      |
| ENSG00000268581 | 5.13E-15 | -2.63127 | 1 | 1 SIGLEC18P      | K06748 |
| ENSG00000268582 | 5.13E-15 | -2.63127 | 1 | 1 AC005794.1     | K18436 |
| ENSG00000268589 | 5.13E-15 | -2.63127 | 1 | 1 CTC-457E21.7   | -      |
| ENSG00000268595 | 5.13E-15 | -2.63127 | 1 | 1 CTD-3187F8.2   | -      |
| ENSG00000268597 | 5.13E-15 | -2.63127 | 1 | 1 RP11-157B13.8  | -      |
| ENSG00000268598 | 5.13E-15 | -2.63127 | 1 | 1 VN1R80P        | -      |
| ENSG00000268601 | 5.13E-15 | -2.63127 | 1 | 1 AC115522.3     | -      |
| ENSG00000268602 | 5.13E-15 | -2.63127 | 1 | 1 AP002353.1     | -      |
| ENSG00000268605 | 5.13E-15 | -2.63127 | 1 | 1 CTB-50E14.4    | -      |
| ENSG00000268613 | 5.13E-15 | -2.63127 | 1 | 1 CTD-2620I22.7  | -      |
| ENSG00000268614 | 5.13E-15 | -2.63127 | 1 | 1 CTD-2207O23.10 | K14676 |
| ENSG00000268618 | 5.13E-15 | -2.63127 | 1 | 1 AC092316.1     | -      |
| ENSG00000268620 | 5.13E-15 | -2.63127 | 1 | 1 AC078899.4     | K09228 |
| ENSG00000268623 | 5.13E-15 | -2.63127 | 1 | 1 CTB-52I2.3     | K17759 |
| ENSG00000268626 | 5.13E-15 | -2.63127 | 1 | 1 AC103809.2     | K10401 |
| ENSG00000268628 | 5.13E-15 | -2.63127 | 1 | 1 AL121761.2     | -      |
| ENSG00000268635 | 5.13E-15 | -2.63127 | 1 | 1 DKFZP434E1119  | K17985 |
| ENSG00000268636 | 5.13E-15 | -2.63127 | 1 | 1 CTB-33G10.11   | -      |
| ENSG00000268640 | 5.13E-15 | -2.63127 | 1 | 1 AC026369.1     | -      |
| ENSG00000268643 | 5.13E-15 | -2.63127 | 1 | 1 AC006486.9     | K08822 |
| ENSG00000268652 | 5.13E-15 | -2.63127 | 1 | 1 CTD-3187F8.7   | K18932 |
| ENSG00000268654 | 5.13E-15 | -2.63127 | 1 | 1 MIMT1          | -      |
| ENSG00000268655 | 5.13E-15 | -2.63127 | 1 | 1 CTB-60B18.10   | -      |
| ENSG00000268657 | 5.13E-15 | -2.63127 | 1 | 1 AL133373.1     | K11447 |
| ENSG00000268658 | 5.13E-15 | -2.63127 | 1 | 1 LINC00664      | -      |
| ENSG00000268659 | 5.13E-15 | -2.63127 | 1 | 1 RP11-310J24.3  | -      |
| ENSG00000268660 | 5.13E-15 | -2.63127 | 1 | 1 LETM1P2        | K17800 |
| ENSG00000268662 | 5.13E-15 | -2.63127 | 1 | 1 AL596220.1     | -      |
| ENSG00000268663 | 5.13E-15 | -2.63127 | 1 | 1 WBP1LP6        | -      |

|                 |          |          |   |                  |        |
|-----------------|----------|----------|---|------------------|--------|
| ENSG00000268669 | 5.13E-15 | -2.63127 | 1 | 1 CTB-60B18.17   | K12457 |
| ENSG00000268673 | 5.13E-15 | -2.63127 | 1 | 1 LLNLR-249E10.1 | -      |
| ENSG00000268674 | 5.13E-15 | -2.63127 | 1 | 1 FAM231B        | -      |
| ENSG00000268677 | 5.13E-15 | -2.63127 | 1 | 1 CTB-33G10.6    | -      |
| ENSG00000268681 | 5.13E-15 | -2.63127 | 1 | 1 COX6CP7        | K02268 |
| ENSG00000268683 | 5.13E-15 | -2.63127 | 1 | 1 CTD-2553L13.4  | -      |
| ENSG00000268685 | 5.13E-15 | -2.63127 | 1 | 1 CTB-31C7.3     | -      |
| ENSG00000268696 | 5.13E-15 | -2.63127 | 1 | 1 ZNF723         | K09228 |
| ENSG00000268702 | 5.13E-15 | -2.63127 | 1 | 1 AL049829.1     | K14396 |
| ENSG00000268705 | 5.13E-15 | -2.63127 | 1 | 1 CTD-2561J22.6  | K15464 |
| ENSG00000268706 | 5.13E-15 | -2.63127 | 1 | 1 AC009802.1     | K13963 |
| ENSG00000268708 | 5.13E-15 | -2.63127 | 1 | 1 BX088651.2     | -      |
| ENSG00000268711 | 5.13E-15 | -2.63127 | 1 | 1 CTD-2616J11.15 | -      |
| ENSG00000268714 | 5.13E-15 | -2.63127 | 1 | 1 CTD-2287O16.3  | K13724 |
| ENSG00000268716 | 5.13E-15 | -2.63127 | 1 | 1 AC055736.1     | -      |
| ENSG00000268717 | 5.13E-15 | -2.63127 | 1 | 1 AC025811.1     | K15464 |
| ENSG00000268721 | 5.13E-15 | -2.63127 | 1 | 1 RP11-588H23.5  | -      |
| ENSG00000268723 | 5.13E-15 | -2.63127 | 1 | 1 CTC-444N24.9   | -      |
| ENSG00000268729 | 5.13E-15 | -2.63127 | 1 | 1 CTD-2105E13.14 | -      |
| ENSG00000268730 | 5.13E-15 | -2.63127 | 1 | 1 AC022819.2     | -      |
| ENSG00000268731 | 5.13E-15 | -2.63127 | 1 | 1 CTD-2561J22.1  | K13628 |
| ENSG00000268734 | 5.13E-15 | -2.63127 | 1 | 1 CTB-61M7.2     | -      |
| ENSG00000268735 | 5.13E-15 | -2.63127 | 1 | 1 AL139080.1     | -      |
| ENSG00000268736 | 5.13E-15 | -2.63127 | 1 | 1 RP11-1281K21.6 | -      |
| ENSG00000268739 | 5.13E-15 | -2.63127 | 1 | 1 CTC-518B2.12   | -      |
| ENSG00000268744 | 5.13E-15 | -2.63127 | 1 | 1 CTD-3105H18.14 | K09228 |
| ENSG00000268745 | 5.13E-15 | -2.63127 | 1 | 1 RP11-298J23.9  | -      |
| ENSG00000268750 | 5.13E-15 | -2.63127 | 1 | 1 CTD-2583A14.10 | K09228 |
| ENSG00000268754 | 5.13E-15 | -2.63127 | 1 | 1 LINC01081      | -      |
| ENSG00000268759 | 5.13E-15 | -2.63127 | 1 | 1 AC135983.2     | K11447 |
| ENSG00000268777 | 5.13E-15 | -2.63127 | 1 | 1 CTD-3073N11.9  | -      |
| ENSG00000268781 | 5.13E-15 | -2.63127 | 1 | 1 AL590235.1     | -      |
| ENSG00000268784 | 5.13E-15 | -2.63127 | 1 | 1 MGC2752        | K04613 |
| ENSG00000268789 | 5.13E-15 | -2.63127 | 1 | 1 VN1R87P        | -      |
| ENSG00000268790 | 5.13E-15 | -2.63127 | 1 | 1 CTC-429P9.4    | K15169 |
| ENSG00000268794 | 5.13E-15 | -2.63127 | 1 | 1 VN1R90P        | K04614 |
| ENSG00000268797 | 5.13E-15 | -2.63127 | 1 | 1 CTC-490E21.12  | K07417 |
| ENSG00000268799 | 5.13E-15 | -2.63127 | 1 | 1 RP11-321E2.13  | K11253 |
| ENSG00000268800 | 5.13E-15 | -2.63127 | 1 | 1 AC112205.1     | K10145 |
| ENSG00000268802 | 5.13E-15 | -2.63127 | 1 | 1 CTD-2587H19.1  | -      |
| ENSG00000268803 | 5.13E-15 | -2.63127 | 1 | 1 RP11-704M14.2  | -      |
| ENSG00000268804 | 5.13E-15 | -2.63127 | 1 | 1 RP11-542M13.3  | -      |
| ENSG00000268809 | 5.13E-15 | -2.63127 | 1 | 1 AC012360.2     | -      |
| ENSG00000268810 | 5.13E-15 | -2.63127 | 1 | 1 AC007193.9     | -      |
| ENSG00000268816 | 5.13E-15 | -2.63127 | 1 | 1 CTD-3093M3.1   | -      |
| ENSG00000268818 | 5.13E-15 | -2.63127 | 1 | 1 AL049747.1     | K06115 |
| ENSG00000268819 | 5.13E-15 | -2.63127 | 1 | 1 AL590812.1     | K09571 |
| ENSG00000268821 | 5.13E-15 | -2.63127 | 1 | 1 AC068039.1     | -      |
| ENSG00000268822 | 5.13E-15 | -2.63127 | 1 | 1 AC011298.1     | -      |
| ENSG00000268823 | 5.13E-15 | -2.63127 | 1 | 1 CTC-457E21.6   | -      |
| ENSG00000268830 | 5.13E-15 | -2.63127 | 1 | 1 AC025811.2     | -      |
| ENSG00000268833 | 5.13E-15 | -2.63127 | 1 | 1 AC011513.4     | -      |
| ENSG00000268834 | 5.13E-15 | -2.63127 | 1 | 1 OR7A1P         | K04257 |
| ENSG00000268839 | 5.13E-15 | -2.63127 | 1 | 1 CTD-3073N11.7  | K10079 |
| ENSG00000268842 | 5.13E-15 | -2.63127 | 1 | 1 CTD-2245F17.2  | -      |
| ENSG00000268845 | 5.13E-15 | -2.63127 | 1 | 1 RP11-1137G4.3  | -      |
| ENSG00000268847 | 5.13E-15 | -2.63127 | 1 | 1 SIGLEC31P      | -      |
| ENSG00000268854 | 5.13E-15 | -2.63127 | 1 | 1 CTD-2545M3.2   | -      |

|                 |          |          |   |                   |        |
|-----------------|----------|----------|---|-------------------|--------|
| ENSG00000268857 | 5.13E-15 | -2.63127 | 1 | 1 AC011308.1      | -      |
| ENSG00000268858 | 5.13E-15 | -2.63127 | 1 | 1 C20ORF135       | -      |
| ENSG00000268861 | 5.13E-15 | -2.63127 | 1 | 1 CTD-2207O23.3   | -      |
| ENSG00000268864 | 5.13E-15 | -2.63127 | 1 | 1 CTB-167G5.5     | K12581 |
| ENSG00000268865 | 5.13E-15 | -2.63127 | 1 | 1 AC026310.1      | K00826 |
| ENSG00000268870 | 5.13E-15 | -2.63127 | 1 | 1 CTD-3105H18.16  | K09228 |
| ENSG00000268873 | 5.13E-15 | -2.63127 | 1 | 1 RP11-138H11.1   | -      |
| ENSG00000268882 | 5.13E-15 | -2.63127 | 1 | 1 AL360181.1      | K00308 |
| ENSG00000268884 | 5.13E-15 | -2.63127 | 1 | 1 CTD-2550O8.7    | K02880 |
| ENSG00000268886 | 5.13E-15 | -2.63127 | 1 | 1 CTD-3099C6.7    | -      |
| ENSG00000268889 | 5.13E-15 | -2.63127 | 1 | 1 CTD-2616J11.14  | -      |
| ENSG00000268892 | 5.13E-15 | -2.63127 | 1 | 1 CTD-3233P19.8   | K09228 |
| ENSG00000268894 | 5.13E-15 | -2.63127 | 1 | 1 PLCE1-AS1       | -      |
| ENSG00000268895 | 5.13E-15 | -2.63127 | 1 | 1 A1BG-AS1        | -      |
| ENSG00000268896 | 5.13E-15 | -2.63127 | 1 | 1 RP11-256I23.1   | -      |
| ENSG00000268898 | 5.13E-15 | -2.63127 | 1 | 1 AC007377.1      | -      |
| ENSG00000268903 | 5.13E-15 | -2.63127 | 1 | 1 RP11-34P13.15   | -      |
| ENSG00000268906 | 5.13E-15 | -2.63127 | 1 | 1 CTC-518B2.9     | -      |
| ENSG00000268908 | 5.13E-15 | -2.63127 | 1 | 1 VN1R92P         | -      |
| ENSG00000268922 | 5.13E-15 | -2.63127 | 1 | 1 CTD-2557P19.4   | -      |
| ENSG00000268923 | 5.13E-15 | -2.63127 | 1 | 1 AL645922.1      | -      |
| ENSG00000268925 | 5.13E-15 | -2.63127 | 1 | 1 AL161645.2      | K07415 |
| ENSG00000268926 | 5.13E-15 | -2.63127 | 1 | 1 DKFZP434H0512   | -      |
| ENSG00000268936 | 5.13E-15 | -2.63127 | 1 | 1 AP003062.1      | -      |
| ENSG00000268948 | 5.13E-15 | -2.63127 | 1 | 1 AC004017.1      | K18047 |
| ENSG00000268949 | 5.13E-15 | -2.63127 | 1 | 1 MRPS17P1        | K15696 |
| ENSG00000268950 | 5.13E-15 | -2.63127 | 1 | 1 AC114494.1      | -      |
| ENSG00000268951 | 5.13E-15 | -2.63127 | 1 | 1 RP11-149F8.3    | -      |
| ENSG00000268953 | 5.13E-15 | -2.63127 | 1 | 1 AC020952.1      | -      |
| ENSG00000268955 | 5.13E-15 | -2.63127 | 1 | 1 LRLE1           | -      |
| ENSG00000268957 | 5.13E-15 | -2.63127 | 1 | 1 SIGLEC26P       | K06473 |
| ENSG00000268960 | 5.13E-15 | -2.63127 | 1 | 1 AC091150.1      | -      |
| ENSG00000268967 | 5.13E-15 | -2.63127 | 1 | 1 RP11-1281K21.10 | K03880 |
| ENSG00000268970 | 5.13E-15 | -2.63127 | 1 | 1 CTD-3099C6.11   | -      |
| ENSG00000268975 | 5.13E-15 | -2.63127 | 1 | 1 MIA-RAB4B       | K07880 |
| ENSG00000268977 | 5.13E-15 | -2.63127 | 1 | 1 PIH1            | -      |
| ENSG00000268981 | 5.13E-15 | -2.63127 | 1 | 1 CTC-457E21.9    | -      |
| ENSG00000268983 | 5.13E-15 | -2.63127 | 1 | 1 AC005253.4      | -      |
| ENSG00000268985 | 5.13E-15 | -2.63127 | 1 | 1 CTD-2528A14.1   | -      |
| ENSG00000268987 | 5.13E-15 | -2.63127 | 1 | 1 CTC-435M10.10   | -      |
| ENSG00000268991 | 5.13E-15 | -2.63127 | 1 | 1 FAM231C         | -      |
| ENSG00000268992 | 5.13E-15 | -2.63127 | 1 | 1 CTB-175P5.2     | -      |
| ENSG00000268993 | 5.13E-15 | -2.63127 | 1 | 1 RP11-439A17.5   | K02891 |
| ENSG00000268997 | 5.13E-15 | -2.63127 | 1 | 1 DNAJC19P3       | K09539 |
| ENSG00000269000 | 5.13E-15 | -2.63127 | 1 | 1 AC108868.1      | -      |
| ENSG00000269001 | 5.13E-15 | -2.63127 | 1 | 1 ZNF818P         | K09228 |
| ENSG00000269009 | 5.13E-15 | -2.63127 | 1 | 1 SLC6A21P        | -      |
| ENSG00000269011 | 5.13E-15 | -2.63127 | 1 | 1 AL050303.1      | -      |
| ENSG00000269012 | 5.13E-15 | -2.63127 | 1 | 1 KRT18P40        | K07604 |
| ENSG00000269014 | 5.13E-15 | -2.63127 | 1 | 1 CTB-147N14.4    | -      |
| ENSG00000269021 | 5.13E-15 | -2.63127 | 1 | 1 CTD-3187F8.12   | K06773 |
| ENSG00000269025 | 5.13E-15 | -2.63127 | 1 | 1 CTC-457E21.5    | -      |
| ENSG00000269026 | 5.13E-15 | -2.63127 | 1 | 1 AC003006.7      | K09228 |
| ENSG00000269027 | 5.13E-15 | -2.63127 | 1 | 1 AC010368.2      | -      |
| ENSG00000269032 | 5.13E-15 | -2.63127 | 1 | 1 AC016629.7      | K05073 |
| ENSG00000269035 | 5.13E-15 | -2.63127 | 1 | 1 CTD-2521M24.10  | -      |
| ENSG00000269037 | 5.13E-15 | -2.63127 | 1 | 1 CTC-523E23.6    | -      |
| ENSG00000269038 | 5.13E-15 | -2.63127 | 1 | 1 AP001462.6      | -      |

|                 |          |          |   |                  |        |
|-----------------|----------|----------|---|------------------|--------|
| ENSG00000269040 | 5.13E-15 | -2.63127 | 1 | 1 CTD-2626G11.3  | --     |
| ENSG00000269042 | 5.13E-15 | -2.63127 | 1 | 1 AP001925.1     | --     |
| ENSG00000269043 | 5.13E-15 | -2.63127 | 1 | 1 CTC-513N18.6   | --     |
| ENSG00000269047 | 5.13E-15 | -2.63127 | 1 | 1 AC009041.2     | --     |
| ENSG00000269048 | 5.13E-15 | -2.63127 | 1 | 1 Z98049.1       | K17985 |
| ENSG00000269049 | 5.13E-15 | -2.63127 | 1 | 1 AC092291.2     | --     |
| ENSG00000269050 | 5.13E-15 | -2.63127 | 1 | 1 CTC-360G5.6    | --     |
| ENSG00000269051 | 5.13E-15 | -2.63127 | 1 | 1 CTD-2245F17.3  | --     |
| ENSG00000269053 | 5.13E-15 | -2.63127 | 1 | 1 CTD-2521M24.8  | --     |
| ENSG00000269055 | 5.13E-15 | -2.63127 | 1 | 1 AC078899.2     | --     |
| ENSG00000269064 | 5.13E-15 | -2.63127 | 1 | 1 AL160286.1     | --     |
| ENSG00000269067 | 5.13E-15 | -2.63127 | 1 | 1 ZNF728         | K09228 |
| ENSG00000269071 | 5.13E-15 | -2.63127 | 1 | 1 AC138517.1     | --     |
| ENSG00000269072 | 5.13E-15 | -2.63127 | 1 | 1 CTD-3187F8.14  | --     |
| ENSG00000269074 | 5.13E-15 | -2.63127 | 1 | 1 AC099344.1     | --     |
| ENSG00000269082 | 5.13E-15 | -2.63127 | 1 | 1 CTD-2620I22.1  | --     |
| ENSG00000269084 | 5.13E-15 | -2.63127 | 1 | 1 AC009977.1     | K17985 |
| ENSG00000269085 | 5.13E-15 | -2.63127 | 1 | 1 CTD-3222D19.10 | --     |
| ENSG00000269086 | 5.13E-15 | -2.63127 | 1 | 1 CTC-523E23.5   | --     |
| ENSG00000269091 | 5.13E-15 | -2.63127 | 1 | 1 CTD-2126E3.3   | --     |
| ENSG00000269093 | 5.13E-15 | -2.63127 | 1 | 1 AC007773.3     | --     |
| ENSG00000269094 | 5.13E-15 | -2.63127 | 1 | 1 AC006449.1     | --     |
| ENSG00000269095 | 5.13E-15 | -2.63127 | 1 | 1 AC010646.3     | K08549 |
| ENSG00000269099 | 5.13E-15 | -2.63127 | 1 | 1 LSP1           | K14957 |
| ENSG00000269103 | 5.13E-15 | -2.63127 | 1 | 1 AC002472.1     | K16467 |
| ENSG00000269104 | 5.13E-15 | -2.63127 | 1 | 1 AL035681.1     | --     |
| ENSG00000269106 | 5.13E-15 | -2.63127 | 1 | 1 CTD-2619J13.23 | --     |
| ENSG00000269107 | 5.13E-15 | -2.63127 | 1 | 1 RP11-15H20.7   | --     |
| ENSG00000269110 | 5.13E-15 | -2.63127 | 1 | 1 CTC-513N18.7   | --     |
| ENSG00000269117 | 5.13E-15 | -2.63127 | 1 | 1 AL121901.1     | --     |
| ENSG00000269118 | 5.13E-15 | -2.63127 | 1 | 1 FAM90A28P      | --     |
| ENSG00000269119 | 5.13E-15 | -2.63127 | 1 | 1 HNRNPA1P52     | K12741 |
| ENSG00000269120 | 5.13E-15 | -2.63127 | 1 | 1 AL133318.1     | --     |
| ENSG00000269121 | 5.13E-15 | -2.63127 | 1 | 1 AC007216.2     | K09488 |
| ENSG00000269124 | 5.13E-15 | -2.63127 | 1 | 1 AC007193.10    | --     |
| ENSG00000269130 | 5.13E-15 | -2.63127 | 1 | 1 SIGLEC28P      | --     |
| ENSG00000269136 | 5.13E-15 | -2.63127 | 1 | 1 RP11-420K14.7  | --     |
| ENSG00000269138 | 5.13E-15 | -2.63127 | 1 | 1 ZNF209P        | K09228 |
| ENSG00000269139 | 5.13E-15 | -2.63127 | 1 | 1 CTD-3193O13.8  | --     |
| ENSG00000269145 | 5.13E-15 | -2.63127 | 1 | 1 AC007192.6     | --     |
| ENSG00000269147 | 5.13E-15 | -2.63127 | 1 | 1 CTD-2542C24.7  | K07604 |
| ENSG00000269151 | 5.13E-15 | -2.63127 | 1 | 1 AC007193.8     | --     |
| ENSG00000269154 | 5.13E-15 | -2.63127 | 1 | 1 AC006539.4     | K15464 |
| ENSG00000269155 | 5.13E-15 | -2.63127 | 1 | 1 AL009178.1     | K09228 |
| ENSG00000269163 | 5.13E-15 | -2.63127 | 1 | 1 CTB-25J19.9    | --     |
| ENSG00000269169 | 5.13E-15 | -2.63127 | 1 | 1 AC004528.1     | K12884 |
| ENSG00000269177 | 5.13E-15 | -2.63127 | 1 | 1 L34079.3       | --     |
| ENSG00000269179 | 5.13E-15 | -2.63127 | 1 | 1 CTC-326K19.6   | K14306 |
| ENSG00000269181 | 5.13E-15 | -2.63127 | 1 | 1 CTD-3073N11.5  | --     |
| ENSG00000269182 | 5.13E-15 | -2.63127 | 1 | 1 AC010760.1     | --     |
| ENSG00000269185 | 5.13E-15 | -2.63127 | 1 | 1 FLJ00325       | --     |
| ENSG00000269186 | 5.13E-15 | -2.63127 | 1 | 1 LINC01082      | --     |
| ENSG00000269188 | 5.13E-15 | -2.63127 | 1 | 1 CTB-60E11.12   | K13334 |
| ENSG00000269189 | 5.13E-15 | -2.63127 | 1 | 1 RP11-573N10.1  | --     |
| ENSG00000269194 | 5.13E-15 | -2.63127 | 1 | 1 AC006942.4     | --     |
| ENSG00000269197 | 5.13E-15 | -2.63127 | 1 | 1 AC090574.1     | --     |
| ENSG00000269199 | 5.13E-15 | -2.63127 | 1 | 1 AC003973.5     | --     |
| ENSG00000269205 | 5.13E-15 | -2.63127 | 1 | 1 AC005606.1     | K17934 |



|                 |          |          |   |                  |        |
|-----------------|----------|----------|---|------------------|--------|
| ENSG00000269210 | 5.13E-15 | -2.63127 | 1 | 1 AC019171.1     | -      |
| ENSG00000269215 | 5.13E-15 | -2.63127 | 1 | 1 AC008964.1     | -      |
| ENSG00000269220 | 5.13E-15 | -2.63127 | 1 | 1 LINC00528      | -      |
| ENSG00000269223 | 5.13E-15 | -2.63127 | 1 | 1 AL158091.1     | -      |
| ENSG00000269225 | 5.13E-15 | -2.63127 | 1 | 1 RP11-15E1.3    | K13676 |
| ENSG00000269228 | 5.13E-15 | -2.63127 | 1 | 1 CTD-3214H19.12 | K02977 |
| ENSG00000269236 | 5.13E-15 | -2.63127 | 1 | 1 CTD-2619J13.1  | K09228 |
| ENSG00000269237 | 5.13E-15 | -2.63127 | 1 | 1 CTD-2561J22.3  | K09228 |
| ENSG00000269244 | 5.13E-15 | -2.63127 | 1 | 1 RPL23AP78      | K02893 |
| ENSG00000269253 | 5.13E-15 | -2.63127 | 1 | 1 SIGLEC21P      | -      |
| ENSG00000269256 | 5.13E-15 | -2.63127 | 1 | 1 RP11-325D15.2  | -      |
| ENSG00000269259 | 5.13E-15 | -2.63127 | 1 | 1 HUG1           | -      |
| ENSG00000269266 | 5.13E-15 | -2.63127 | 1 | 1 DNAJC19P2      | K09539 |
| ENSG00000269267 | 5.13E-15 | -2.63127 | 1 | 1 AC008498.1     | -      |
| ENSG00000269271 | 5.13E-15 | -2.63127 | 1 | 1 CTB-83J4.2     | -      |
| ENSG00000269274 | 5.13E-15 | -2.63127 | 1 | 1 AC078899.3     | K09228 |
| ENSG00000269288 | 5.13E-15 | -2.63127 | 1 | 1 CTD-2245F17.6  | -      |
| ENSG00000269289 | 5.13E-15 | -2.63127 | 1 | 1 CTB-92J24.3    | -      |
| ENSG00000269291 | 5.13E-15 | -2.63127 | 1 | 1 AC010877.1     | K15696 |
| ENSG00000269292 | 5.13E-15 | -2.63127 | 1 | 1 CTB-12A17.3    | -      |
| ENSG00000269295 | 5.13E-15 | -2.63127 | 1 | 1 AL358113.1     | -      |
| ENSG00000269300 | 5.13E-15 | -2.63127 | 1 | 1 CTD-2529P6.3   | -      |
| ENSG00000269302 | 5.13E-15 | -2.63127 | 1 | 1 AC110771.1     | -      |
| ENSG00000269303 | 5.13E-15 | -2.63127 | 1 | 1 CTD-2527I21.7  | -      |
| ENSG00000269307 | 5.13E-15 | -2.63127 | 1 | 1 CTD-2278I10.6  | -      |
| ENSG00000269308 | 5.13E-15 | -2.63127 | 1 | 1 AL645608.2     | -      |
| ENSG00000269316 | 5.13E-15 | -2.63127 | 1 | 1 CTC-457E21.4   | K10876 |
| ENSG00000269320 | 5.13E-15 | -2.63127 | 1 | 1 VN1R93P        | -      |
| ENSG00000269332 | 5.13E-15 | -2.63127 | 1 | 1 CTC-457E21.3   | -      |
| ENSG00000269339 | 5.13E-15 | -2.63127 | 1 | 1 AC139768.1     | -      |
| ENSG00000269345 | 5.13E-15 | -2.63127 | 1 | 1 VN1R85P        | -      |
| ENSG00000269349 | 5.13E-15 | -2.63127 | 1 | 1 CTD-3099C6.5   | -      |
| ENSG00000269350 | 5.13E-15 | -2.63127 | 1 | 1 CTD-2278I10.1  | -      |
| ENSG00000269353 | 5.13E-15 | -2.63127 | 1 | 1 AC092071.1     | -      |
| ENSG00000269354 | 5.13E-15 | -2.63127 | 1 | 1 AC005626.3     | -      |
| ENSG00000269356 | 5.13E-15 | -2.63127 | 1 | 1 RP11-120K24.4  | -      |
| ENSG00000269360 | 5.13E-15 | -2.63127 | 1 | 1 AC112693.2     | K12581 |
| ENSG00000269364 | 5.13E-15 | -2.63127 | 1 | 1 CTC-457E21.2   | -      |
| ENSG00000269365 | 5.13E-15 | -2.63127 | 1 | 1 RP11-380M21.4  | -      |
| ENSG00000269367 | 5.13E-15 | -2.63127 | 1 | 1 AC020629.1     | -      |
| ENSG00000269371 | 5.13E-15 | -2.63127 | 1 | 1 CTD-2207O23.11 | -      |
| ENSG00000269372 | 5.13E-15 | -2.63127 | 1 | 1 CTC-513N18.4   | K08789 |
| ENSG00000269373 | 5.13E-15 | -2.63127 | 1 | 1 CTD-2542C24.3  | K09228 |
| ENSG00000269375 | 5.13E-15 | -2.63127 | 1 | 1 AL117190.3     | K12581 |
| ENSG00000269376 | 5.13E-15 | -2.63127 | 1 | 1 RP11-120K24.5  | -      |
| ENSG00000269383 | 5.13E-15 | -2.63127 | 1 | 1 AC012493.2     | K08738 |
| ENSG00000269385 | 5.13E-15 | -2.63127 | 1 | 1 CTC-312O10.2   | K04591 |
| ENSG00000269387 | 5.13E-15 | -2.63127 | 1 | 1 RP11-298J23.8  | -      |
| ENSG00000269391 | 5.13E-15 | -2.63127 | 1 | 1 RP11-194G10.3  | -      |
| ENSG00000269392 | 5.13E-15 | -2.63127 | 1 | 1 CTB-191K22.6   | -      |
| ENSG00000269393 | 5.13E-15 | -2.63127 | 1 | 1 AC007965.1     | -      |
| ENSG00000269396 | 5.13E-15 | -2.63127 | 1 | 1 AC187652.1     | -      |
| ENSG00000269400 | 5.13E-15 | -2.63127 | 1 | 1 CTD-2529P6.4   | -      |
| ENSG00000269404 | 5.13E-15 | -2.63127 | 1 | 1 SPIB           | K09439 |
| ENSG00000269408 | 5.13E-15 | -2.63127 | 1 | 1 AL390778.1     | -      |
| ENSG00000269410 | 5.13E-15 | -2.63127 | 1 | 1 CTB-60E11.4    | -      |
| ENSG00000269415 | 5.13E-15 | -2.63127 | 1 | 1 NPCDR1         | -      |
| ENSG00000269416 | 5.13E-15 | -2.63127 | 1 | 1 CTB-175P5.4    | -      |

|                 |          |          |   |                  |        |
|-----------------|----------|----------|---|------------------|--------|
| ENSG00000269417 | 5.13E-15 | -2.63127 | 1 | 1 AC022210.1     | -      |
| ENSG00000269419 | 5.13E-15 | -2.63127 | 1 | 1 CTD-2538G9.3   | K01230 |
| ENSG00000269420 | 5.13E-15 | -2.63127 | 1 | 1 CTD-2265M8.2   | -      |
| ENSG00000269421 | 5.13E-15 | -2.63127 | 1 | 1 ZNF92P3        | K09228 |
| ENSG00000269422 | 5.13E-15 | -2.63127 | 1 | 1 AC092384.1     | -      |
| ENSG00000269444 | 5.13E-15 | -2.63127 | 1 | 1 CTB-180A7.6    | -      |
| ENSG00000269445 | 5.13E-15 | -2.63127 | 1 | 1 AC067969.1     | -      |
| ENSG00000269446 | 5.13E-15 | -2.63127 | 1 | 1 AC006967.1     | K12581 |
| ENSG00000269449 | 5.13E-15 | -2.63127 | 1 | 1 AC002451.1     | K11447 |
| ENSG00000269458 | 5.13E-15 | -2.63127 | 1 | 1 CTD-2579N5.4   | K08789 |
| ENSG00000269460 | 5.13E-15 | -2.63127 | 1 | 1 AC093063.3     | -      |
| ENSG00000269463 | 5.13E-15 | -2.63127 | 1 | 1 RP11-727F15.13 | -      |
| ENSG00000269464 | 5.13E-15 | -2.63127 | 1 | 1 AC012067.1     | -      |
| ENSG00000269468 | 5.13E-15 | -2.63127 | 1 | 1 AC004824.2     | K17985 |
| ENSG00000269469 | 5.13E-15 | -2.63127 | 1 | 1 CTD-3148I10.9  | K05454 |
| ENSG00000269471 | 5.13E-15 | -2.63127 | 1 | 1 RP11-15H20.2   | -      |
| ENSG00000269474 | 5.13E-15 | -2.63127 | 1 | 1 BX649597.4     | K09571 |
| ENSG00000269480 | 5.13E-15 | -2.63127 | 1 | 1 CTD-3032J10.3  | -      |
| ENSG00000269483 | 5.13E-15 | -2.63127 | 1 | 1 AC006272.1     | -      |
| ENSG00000269490 | 5.13E-15 | -2.63127 | 1 | 1 SBP1           | -      |
| ENSG00000269494 | 5.13E-15 | -2.63127 | 1 | 1 AL359693.1     | -      |
| ENSG00000269495 | 5.13E-15 | -2.63127 | 1 | 1 CTB-147C22.8   | -      |
| ENSG00000269496 | 5.13E-15 | -2.63127 | 1 | 1 AC007919.2     | -      |
| ENSG00000269504 | 5.13E-15 | -2.63127 | 1 | 1 AC003973.4     | -      |
| ENSG00000269505 | 5.13E-15 | -2.63127 | 1 | 1 ZNF92P2        | K09228 |
| ENSG00000269506 | 5.13E-15 | -2.63127 | 1 | 1 AC110792.1     | -      |
| ENSG00000269509 | 5.13E-15 | -2.63127 | 1 | 1 CTB-159G17.2   | -      |
| ENSG00000269510 | 5.13E-15 | -2.63127 | 1 | 1 FLJ00273       | -      |
| ENSG00000269514 | 5.13E-15 | -2.63127 | 1 | 1 DKFZP779L1853  | K02927 |
| ENSG00000269515 | 5.13E-15 | -2.63127 | 1 | 1 AL137026.1     | -      |
| ENSG00000269519 | 5.13E-15 | -2.63127 | 1 | 1 AC005176.1     | -      |
| ENSG00000269524 | 5.13E-15 | -2.63127 | 1 | 1 CTB-83J4.1     | -      |
| ENSG00000269529 | 5.13E-15 | -2.63127 | 1 | 1 AC140061.12    | K11447 |
| ENSG00000269531 | 5.13E-15 | -2.63127 | 1 | 1 AC073569.1     | -      |
| ENSG00000269533 | 5.13E-15 | -2.63127 | 1 | 1 AC003002.6     | K09228 |
| ENSG00000269535 | 5.13E-15 | -2.63127 | 1 | 1 CTD-2525I3.6   | -      |
| ENSG00000269540 | 5.13E-15 | -2.63127 | 1 | 1 CTD-2126E3.5   | K09228 |
| ENSG00000269543 | 5.13E-15 | -2.63127 | 1 | 1 CTD-2291D10.3  | -      |
| ENSG00000269545 | 5.13E-15 | -2.63127 | 1 | 1 CTD-3138B18.4  | K09228 |
| ENSG00000269546 | 5.13E-15 | -2.63127 | 1 | 1 CTD-2396E7.8   | K05024 |
| ENSG00000269547 | 5.13E-15 | -2.63127 | 1 | 1 CTC-360G5.8    | K01875 |
| ENSG00000269552 | 5.13E-15 | -2.63127 | 1 | 1 AC005255.5     | K04257 |
| ENSG00000269553 | 5.13E-15 | -2.63127 | 1 | 1 U62631.5       | -      |
| ENSG00000269554 | 5.13E-15 | -2.63127 | 1 | 1 AL590822.2     | K17985 |
| ENSG00000269558 | 5.13E-15 | -2.63127 | 1 | 1 AC104057.1     | K14958 |
| ENSG00000269563 | 5.13E-15 | -2.63127 | 1 | 1 AC138655.1     | K09228 |
| ENSG00000269564 | 5.13E-15 | -2.63127 | 1 | 1 AC008753.4     | -      |
| ENSG00000269565 | 5.13E-15 | -2.63127 | 1 | 1 GPR32P1        | K08381 |
| ENSG00000269574 | 5.13E-15 | -2.63127 | 1 | 1 CTD-2611O12.7  | -      |
| ENSG00000269575 | 5.13E-15 | -2.63127 | 1 | 1 RP11-157B13.3  | -      |
| ENSG00000269576 | 5.13E-15 | -2.63127 | 1 | 1 HNRNPMP2       | K12887 |
| ENSG00000269580 | 5.13E-15 | -2.63127 | 1 | 1 SIGLEC27P      | -      |
| ENSG00000269583 | 5.13E-15 | -2.63127 | 1 | 1 L34079.4       | -      |
| ENSG00000269588 | 5.13E-15 | -2.63127 | 1 | 1 CTB-60E11.11   | K13334 |
| ENSG00000269590 | 5.13E-15 | -2.63127 | 1 | 1 CTD-2192J16.24 | K12311 |
| ENSG00000269599 | 5.13E-15 | -2.63127 | 1 | 1 RP11-261P24.2  | -      |
| ENSG00000269601 | 5.13E-15 | -2.63127 | 1 | 1 AP000758.1     | K07532 |
| ENSG00000269604 | 5.13E-15 | -2.63127 | 1 | 1 AC005523.2     | -      |

|                 |          |          |   |                  |        |
|-----------------|----------|----------|---|------------------|--------|
| ENSG00000269605 | 5.13E-15 | -2.63127 | 1 | 1 Z97053.1       | -      |
| ENSG00000269608 | 5.13E-15 | -2.63127 | 1 | 1 CTB-167G5.3    | -      |
| ENSG00000269614 | 5.13E-15 | -2.63127 | 1 | 1 RP11-277L2.5   | -      |
| ENSG00000269615 | 5.13E-15 | -2.63127 | 1 | 1 AC003973.1     | -      |
| ENSG00000269620 | 5.13E-15 | -2.63127 | 1 | 1 AL590560.1     | -      |
| ENSG00000269621 | 5.13E-15 | -2.63127 | 1 | 1 RP11-98D18.15  | -      |
| ENSG00000269622 | 5.13E-15 | -2.63127 | 1 | 1 RP11-80F22.2   | -      |
| ENSG00000269630 | 5.13E-15 | -2.63127 | 1 | 1 AC015989.2     | -      |
| ENSG00000269633 | 5.13E-15 | -2.63127 | 1 | 1 AC017081.1     | -      |
| ENSG00000269635 | 5.13E-15 | -2.63127 | 1 | 1 AC004257.1     | -      |
| ENSG00000269636 | 5.13E-15 | -2.63127 | 1 | 1 AC010441.1     | -      |
| ENSG00000269637 | 5.13E-15 | -2.63127 | 1 | 1 RPL12P41       | K02870 |
| ENSG00000269641 | 5.13E-15 | -2.63127 | 1 | 1 CTB-167G5.6    | K13865 |
| ENSG00000269646 | 5.13E-15 | -2.63127 | 1 | 1 CTD-2331H12.7  | -      |
| ENSG00000269647 | 5.13E-15 | -2.63127 | 1 | 1 BX842679.1     | K16467 |
| ENSG00000269650 | 5.13E-15 | -2.63127 | 1 | 1 AL121895.1     | -      |
| ENSG00000269651 | 5.13E-15 | -2.63127 | 1 | 1 CTD-3020H12.3  | K03844 |
| ENSG00000269662 | 5.13E-15 | -2.63127 | 1 | 1 RP11-255H23.3  | K15464 |
| ENSG00000269667 | 5.13E-15 | -2.63127 | 1 | 1 RP11-542M13.2  | -      |
| ENSG00000269676 | 5.13E-15 | -2.63127 | 1 | 1 MUC8           | -      |
| ENSG00000269678 | 5.13E-15 | -2.63127 | 1 | 1 OR7A18P        | K04257 |
| ENSG00000269679 | 5.13E-15 | -2.63127 | 1 | 1 AC018445.1     | -      |
| ENSG00000269681 | 5.13E-15 | -2.63127 | 1 | 1 CTD-3187F8.6   | K06499 |
| ENSG00000269686 | 5.13E-15 | -2.63127 | 1 | 1 AC011755.1     | -      |
| ENSG00000269690 | 5.13E-15 | -2.63127 | 1 | 1 AC096677.1     | K16776 |
| ENSG00000269692 | 5.13E-15 | -2.63127 | 1 | 1 RP11-45O22.1   | K09571 |
| ENSG00000269694 | 5.13E-15 | -2.63127 | 1 | 1 AC005197.2     | -      |
| ENSG00000269696 | 5.13E-15 | -2.63127 | 1 | 1 AC007228.11    | -      |
| ENSG00000269699 | 5.13E-15 | -2.63127 | 1 | 1 ZIM2           | K09229 |
| ENSG00000269706 | 5.13E-15 | -2.63127 | 1 | 1 CTB-60B18.15   | K12457 |
| ENSG00000269707 | 5.13E-15 | -2.63127 | 1 | 1 RP11-13J10.1   | -      |
| ENSG00000269709 | 5.13E-15 | -2.63127 | 1 | 1 AL109659.1     | -      |
| ENSG00000269711 | 5.13E-15 | -2.63127 | 1 | 1 CTD-3214H19.16 | K10840 |
| ENSG00000269721 | 5.13E-15 | -2.63127 | 1 | 1 RPL23AP51      | K02893 |
| ENSG00000269732 | 5.13E-15 | -2.63127 | 1 | 1 WBP1LP7        | -      |
| ENSG00000269738 | 5.13E-15 | -2.63127 | 1 | 1 AL162424.1     | -      |
| ENSG00000269741 | 5.13E-15 | -2.63127 | 1 | 1 KLK9           | K09618 |
| ENSG00000269742 | 5.13E-15 | -2.63127 | 1 | 1 CTB-135N1.2    | -      |
| ENSG00000269745 | 5.13E-15 | -2.63127 | 1 | 1 AC006262.10    | -      |
| ENSG00000269749 | 5.13E-15 | -2.63127 | 1 | 1 AC005614.5     | -      |
| ENSG00000269751 | 5.13E-15 | -2.63127 | 1 | 1 CTC-273B12.8   | -      |
| ENSG00000269752 | 5.13E-15 | -2.63127 | 1 | 1 CTD-3149D2.3   | -      |
| ENSG00000269755 | 5.13E-15 | -2.63127 | 1 | 1 CTD-3105H18.18 | K09228 |
| ENSG00000269758 | 5.13E-15 | -2.63127 | 1 | 1 CTD-2245F17.9  | -      |
| ENSG00000269761 | 5.13E-15 | -2.63127 | 1 | 1 RP11-1137G4.4  | -      |
| ENSG00000269763 | 5.13E-15 | -2.63127 | 1 | 1 EXOSC3P2       | K03681 |
| ENSG00000269765 | 5.13E-15 | -2.63127 | 1 | 1 CTB-187L3.1    | K17597 |
| ENSG00000269766 | 5.13E-15 | -2.63127 | 1 | 1 AL356215.1     | -      |
| ENSG00000269774 | 5.13E-15 | -2.63127 | 1 | 1 AC005399.1     | K17985 |
| ENSG00000269776 | 5.13E-15 | -2.63127 | 1 | 1 DPPA5P1        | -      |
| ENSG00000269779 | 5.13E-15 | -2.63127 | 1 | 1 CTD-2542C24.2  | K09228 |
| ENSG00000269782 | 5.13E-15 | -2.63127 | 1 | 1 MIR1470        | -      |
| ENSG00000269783 | 5.13E-15 | -2.63127 | 1 | 1 GOLGA7B        | -      |
| ENSG00000269786 | 5.13E-15 | -2.63127 | 1 | 1 CTC-258N23.3   | -      |
| ENSG00000269787 | 5.13E-15 | -2.63127 | 1 | 1 OR7A3P         | K04257 |
| ENSG00000269788 | 5.13E-15 | -2.63127 | 1 | 1 RP11-399F4.2   | -      |
| ENSG00000269792 | 5.13E-15 | -2.63127 | 1 | 1 CTB-60E11.9    | -      |
| ENSG00000269793 | 5.13E-15 | -2.63127 | 1 | 1 AC006115.3     | -      |

|                 |          |          |   |                  |        |
|-----------------|----------|----------|---|------------------|--------|
| ENSG00000269795 | 5.13E-15 | -2.63127 | 1 | 1 AC092782.1     | --     |
| ENSG00000269796 | 5.13E-15 | -2.63127 | 1 | 1 AC011516.1     | --     |
| ENSG00000269799 | 5.13E-15 | -2.63127 | 1 | 1 CTD-2538G9.6   | --     |
| ENSG00000269800 | 5.13E-15 | -2.63127 | 1 | 1 PLEKHA3P1      | --     |
| ENSG00000269802 | 5.13E-15 | -2.63127 | 1 | 1 CTB-180A7.3    | --     |
| ENSG00000269804 | 5.13E-15 | -2.63127 | 1 | 1 AL353354.2     | --     |
| ENSG00000269807 | 5.13E-15 | -2.63127 | 1 | 1 AC007292.4     | --     |
| ENSG00000269808 | 5.13E-15 | -2.63127 | 1 | 1 AC010327.2     | K18575 |
| ENSG00000269810 | 5.13E-15 | -2.63127 | 1 | 1 AC015660.1     | --     |
| ENSG00000269811 | 5.13E-15 | -2.63127 | 1 | 1 SCGB2B3P       | --     |
| ENSG00000269813 | 5.13E-15 | -2.63127 | 1 | 1 CTD-3193O13.14 | --     |
| ENSG00000269821 | 5.13E-15 | -2.63127 | 1 | 1 KCNQ1OT1       | --     |
| ENSG00000269825 | 5.13E-15 | -2.63127 | 1 | 1 CTD-3099C6.9   | --     |
| ENSG00000269826 | 5.13E-15 | -2.63127 | 1 | 1 RP11-158I3.3   | --     |
| ENSG00000269831 | 5.13E-15 | -2.63127 | 1 | 1 AL669831.1     | K11447 |
| ENSG00000269836 | 5.13E-15 | -2.63127 | 1 | 1 CTD-3032J10.4  | --     |
| ENSG00000269837 | 5.13E-15 | -2.63127 | 1 | 1 RP11-15H20.5   | --     |
| ENSG00000269839 | 5.13E-15 | -2.63127 | 1 | 1 CTD-3233P19.7  | K09228 |
| ENSG00000269842 | 5.13E-15 | -2.63127 | 1 | 1 MIR519A2       | --     |
| ENSG00000269845 | 5.13E-15 | -2.63127 | 1 | 1 RP11-420K14.6  | --     |
| ENSG00000269848 | 5.13E-15 | -2.63127 | 1 | 1 RP11-128IK21.9 | --     |
| ENSG00000269855 | 5.13E-15 | -2.63127 | 1 | 1 AC012313.1     | --     |
| ENSG00000269866 | 5.13E-15 | -2.63127 | 1 | 1 FKSG63         | --     |
| ENSG00000269871 | 5.13E-15 | -2.63127 | 1 | 1 AC040977.1     | K19770 |
| ENSG00000269873 | 5.13E-15 | -2.63127 | 1 | 1 CTD-2587H19.3  | --     |
| ENSG00000269877 | 5.13E-15 | -2.63127 | 1 | 1 MIR371B        | --     |
| ENSG00000269879 | 5.13E-15 | -2.63127 | 1 | 1 AL353583.1     | --     |
| ENSG00000269883 | 5.13E-15 | -2.63127 | 1 | 1 AC007375.1     | --     |
| ENSG00000269885 | 5.13E-15 | -2.63127 | 1 | 1 VN1R79P        | K04614 |
| ENSG00000269886 | 5.13E-15 | -2.63127 | 1 | 1 RP11-266J6.2   | --     |
| ENSG00000269888 | 5.13E-15 | -2.63127 | 1 | 1 RP11-3P17.5    | --     |
| ENSG00000269891 | 5.13E-15 | -2.63127 | 1 | 1 ARHGAP19-SLIT1 | --     |
| ENSG00000269897 | 5.13E-15 | -2.63127 | 1 | 1 COMMD3-BMI1    | K11459 |
| ENSG00000269902 | 5.13E-15 | -2.63127 | 1 | 1 RP6-99M1.3     | --     |
| ENSG00000269904 | 5.13E-15 | -2.63127 | 1 | 1 MAP2K4P1       | K04430 |
| ENSG00000269905 | 5.13E-15 | -2.63127 | 1 | 1 RP11-271K21.11 | --     |
| ENSG00000269907 | 5.13E-15 | -2.63127 | 1 | 1 RP11-330M2.4   | K13784 |
| ENSG00000269908 | 5.13E-15 | -2.63127 | 1 | 1 RP11-1406H17.1 | --     |
| ENSG00000269909 | 5.13E-15 | -2.63127 | 1 | 1 RP11-489N22.3  | --     |
| ENSG00000269911 | 5.13E-15 | -2.63127 | 1 | 1 FAM226B        | --     |
| ENSG00000269916 | 5.13E-15 | -2.63127 | 1 | 1 RP11-193M21.1  | --     |
| ENSG00000269918 | 5.13E-15 | -2.63127 | 1 | 1 AF131215.9     | --     |
| ENSG00000269920 | 5.13E-15 | -2.63127 | 1 | 1 RP11-690P14.4  | K19352 |
| ENSG00000269923 | 5.13E-15 | -2.63127 | 1 | 1 RP11-214K3.24  | --     |
| ENSG00000269926 | 5.13E-15 | -2.63127 | 1 | 1 RP11-442H21.2  | --     |
| ENSG00000269930 | 5.13E-15 | -2.63127 | 1 | 1 RP11-932O9.9   | --     |
| ENSG00000269931 | 5.13E-15 | -2.63127 | 1 | 1 RP5-1069C8.3   | --     |
| ENSG00000269933 | 5.13E-15 | -2.63127 | 1 | 1 RP3-333A15.2   | --     |
| ENSG00000269936 | 5.13E-15 | -2.63127 | 1 | 1 MIR145         | --     |
| ENSG00000269939 | 5.13E-15 | -2.63127 | 1 | 1 RP11-727A23.11 | --     |
| ENSG00000269941 | 5.13E-15 | -2.63127 | 1 | 1 RP5-1172N10.4  | --     |
| ENSG00000269944 | 5.13E-15 | -2.63127 | 1 | 1 RP11-770J1.7   | --     |
| ENSG00000269945 | 5.13E-15 | -2.63127 | 1 | 1 RP6-91H8.5     | --     |
| ENSG00000269948 | 5.13E-15 | -2.63127 | 1 | 1 RP11-248J23.6  | K19352 |
| ENSG00000269950 | 5.13E-15 | -2.63127 | 1 | 1 AP000962.2     | --     |
| ENSG00000269954 | 5.13E-15 | -2.63127 | 1 | 1 RP11-148O21.6  | --     |
| ENSG00000269957 | 5.13E-15 | -2.63127 | 1 | 1 RP11-20A20.2   | --     |
| ENSG00000269964 | 5.13E-15 | -2.63127 | 1 | 1 MEI4           | --     |

|                 |          |          |   |                  |        |
|-----------------|----------|----------|---|------------------|--------|
| ENSG00000269966 | 5.13E-15 | -2.63127 | 1 | 1 RP3-331H24.5   | --     |
| ENSG00000269968 | 5.13E-15 | -2.63127 | 1 | 1 RP5-940J5.9    | --     |
| ENSG00000269970 | 5.13E-15 | -2.63127 | 1 | 1 RP11-498E2.9   | --     |
| ENSG00000269971 | 5.13E-15 | -2.63127 | 1 | 1 RP3-426I6.5    | --     |
| ENSG00000269972 | 5.13E-15 | -2.63127 | 1 | 1 RP3-430N8.10   | --     |
| ENSG00000269975 | 5.13E-15 | -2.63127 | 1 | 1 RP11-58B17.2   | --     |
| ENSG00000269978 | 5.13E-15 | -2.63127 | 1 | 1 RP11-338N10.3  | --     |
| ENSG00000269981 | 5.13E-15 | -2.63127 | 1 | 1 RP11-34P13.16  | --     |
| ENSG00000269983 | 5.13E-15 | -2.63127 | 1 | 1 RP11-497H16.9  | --     |
| ENSG00000269985 | 5.13E-15 | -2.63127 | 1 | 1 RP1-232P20.1   | --     |
| ENSG00000269986 | 5.13E-15 | -2.63127 | 1 | 1 RP11-96H17.3   | --     |
| ENSG00000269987 | 5.13E-15 | -2.63127 | 1 | 1 RP3-430N8.11   | --     |
| ENSG00000269998 | 5.13E-15 | -2.63127 | 1 | 1 RP11-272L13.3  | --     |
| ENSG00000270000 | 5.13E-15 | -2.63127 | 1 | 1 RP3-449M8.9    | --     |
| ENSG00000270005 | 5.13E-15 | -2.63127 | 1 | 1 RP11-380L11.3  | --     |
| ENSG00000270008 | 5.13E-15 | -2.63127 | 1 | 1 RP11-298P3.4   | --     |
| ENSG00000270010 | 5.13E-15 | -2.63127 | 1 | 1 CTD-2132N18.4  | --     |
| ENSG00000270012 | 5.13E-15 | -2.63127 | 1 | 1 LL0XNC01-7P3.1 | --     |
| ENSG00000270017 | 5.13E-15 | -2.63127 | 1 | 1 CTD-2576F9.2   | --     |
| ENSG00000270028 | 5.13E-15 | -2.63127 | 1 | 1 RP11-380L11.4  | --     |
| ENSG00000270033 | 5.13E-15 | -2.63127 | 1 | 1 RP11-51L5.7    | K11837 |
| ENSG00000270035 | 5.13E-15 | -2.63127 | 1 | 1 RP11-338N10.2  | --     |
| ENSG00000270038 | 5.13E-15 | -2.63127 | 1 | 1 RP11-1070N10.7 | --     |
| ENSG00000270050 | 5.13E-15 | -2.63127 | 1 | 1 RP4-769N13.7   | --     |
| ENSG00000270052 | 5.13E-15 | -2.63127 | 1 | 1 WI2-80269A6.1  | --     |
| ENSG00000270058 | 5.13E-15 | -2.63127 | 1 | 1 RP11-514D23.3  | --     |
| ENSG00000270059 | 5.13E-15 | -2.63127 | 1 | 1 RP11-88H12.2   | --     |
| ENSG00000270068 | 5.13E-15 | -2.63127 | 1 | 1 RP4-761J14.9   | --     |
| ENSG00000270072 | 5.13E-15 | -2.63127 | 1 | 1 RP11-750H9.7   | --     |
| ENSG00000270073 | 5.13E-15 | -2.63127 | 1 | 1 AC006156.2     | K11284 |
| ENSG00000270074 | 5.13E-15 | -2.63127 | 1 | 1 LINC00965      | --     |
| ENSG00000270075 | 5.13E-15 | -2.63127 | 1 | 1 RP11-127L20.5  | --     |
| ENSG00000270076 | 5.13E-15 | -2.63127 | 1 | 1 AF131215.8     | --     |
| ENSG00000270077 | 5.13E-15 | -2.63127 | 1 | 1 KB-1958F4.1    | --     |
| ENSG00000270082 | 5.13E-15 | -2.63127 | 1 | 1 RP11-178L8.8   | --     |
| ENSG00000270083 | 5.13E-15 | -2.63127 | 1 | 1 RP1-257I20.14  | --     |
| ENSG00000270087 | 5.13E-15 | -2.63127 | 1 | 1 RP11-399K21.11 | --     |
| ENSG00000270090 | 5.13E-15 | -2.63127 | 1 | 1 RP11-529E10.7  | --     |
| ENSG00000270092 | 5.13E-15 | -2.63127 | 1 | 1 RP11-318K12.3  | K14957 |
| ENSG00000270093 | 5.13E-15 | -2.63127 | 1 | 1 AP000473.8     | --     |
| ENSG00000270094 | 5.13E-15 | -2.63127 | 1 | 1 RP11-245P10.8  | --     |
| ENSG00000270096 | 5.13E-15 | -2.63127 | 1 | 1 RP11-362K14.6  | --     |
| ENSG00000270098 | 5.13E-15 | -2.63127 | 1 | 1 LDHAL6EP       | K00016 |
| ENSG00000270099 | 5.13E-15 | -2.63127 | 1 | 1 RP11-248J23.7  | K19352 |
| ENSG00000270100 | 5.13E-15 | -2.63127 | 1 | 1 RP11-130L8.1   | --     |
| ENSG00000270105 | 5.13E-15 | -2.63127 | 1 | 1 RP11-326C3.14  | --     |
| ENSG00000270106 | 5.13E-15 | -2.63127 | 1 | 1 TSNAX-DISC1    | K16534 |
| ENSG00000270111 | 5.13E-15 | -2.63127 | 1 | 1 RP11-271F18.4  | --     |
| ENSG00000270112 | 5.13E-15 | -2.63127 | 1 | 1 RP11-742D12.2  | --     |
| ENSG00000270113 | 5.13E-15 | -2.63127 | 1 | 1 RP11-282O18.6  | --     |
| ENSG00000270114 | 5.13E-15 | -2.63127 | 1 | 1 RP5-1048B16.1  | --     |
| ENSG00000270117 | 5.13E-15 | -2.63127 | 1 | 1 AP000769.7     | --     |
| ENSG00000270118 | 5.13E-15 | -2.63127 | 1 | 1 RP11-57A19.5   | --     |
| ENSG00000270119 | 5.13E-15 | -2.63127 | 1 | 1 RP11-301J7.8   | --     |
| ENSG00000270120 | 5.13E-15 | -2.63127 | 1 | 1 RP11-327F22.6  | --     |
| ENSG00000270123 | 5.13E-15 | -2.63127 | 1 | 1 VTRNA2-1       | --     |
| ENSG00000270131 | 5.13E-15 | -2.63127 | 1 | 1 KB-1043D8.8    | --     |
| ENSG00000270132 | 5.13E-15 | -2.63127 | 1 | 1 WISP1-OT1      | --     |

|                 |          |          |   |                  |        |
|-----------------|----------|----------|---|------------------|--------|
| ENSG00000270134 | 5.13E-15 | -2.63127 | 1 | 1 RP11-324E6.9   | --     |
| ENSG00000270135 | 5.13E-15 | -2.63127 | 1 | 1 RP11-362K14.7  | --     |
| ENSG00000270139 | 5.13E-15 | -2.63127 | 1 | 1 AP001172.3     | --     |
| ENSG00000270140 | 5.13E-15 | -2.63127 | 1 | 1 RP5-1021I20.6  | --     |
| ENSG00000270149 | 5.13E-15 | -2.63127 | 1 | 1 RP11-544M22.13 | K06089 |
| ENSG00000270159 | 5.13E-15 | -2.63127 | 1 | 1 RP11-568J23.6  | --     |
| ENSG00000270160 | 5.13E-15 | -2.63127 | 1 | 1 RP11-264E20.2  | --     |
| ENSG00000270163 | 5.13E-15 | -2.63127 | 1 | 1 RP11-1085N6.6  | --     |
| ENSG00000270164 | 5.13E-15 | -2.63127 | 1 | 1 AC006129.4     | --     |
| ENSG00000270165 | 5.13E-15 | -2.63127 | 1 | 1 RP11-167P11.2  | --     |
| ENSG00000270166 | 5.13E-15 | -2.63127 | 1 | 1 RP11-158D2.1   | K11300 |
| ENSG00000270171 | 5.13E-15 | -2.63127 | 1 | 1 RP11-338N10.1  | --     |
| ENSG00000270173 | 5.13E-15 | -2.63127 | 1 | 1 RP11-382B18.4  | --     |
| ENSG00000270174 | 5.13E-15 | -2.63127 | 1 | 1 RP1-256G22.2   | --     |
| ENSG00000270179 | 5.13E-15 | -2.63127 | 1 | 1 RP11-159N11.4  | --     |
| ENSG00000270181 | 5.13E-15 | -2.63127 | 1 | 1 BIVM-ERCC5     | K10846 |
| ENSG00000270182 | 5.13E-15 | -2.63127 | 1 | 1 RP1-170O19.21  | --     |
| ENSG00000270185 | 5.13E-15 | -2.63127 | 1 | 1 IGHD1OR15-1B   | --     |
| ENSG00000270187 | 5.13E-15 | -2.63127 | 1 | 1 IGKV1OR2-11    | --     |
| ENSG00000270188 | 5.13E-15 | -2.63127 | 1 | 1 MTRNR2L11      | K01982 |
| ENSG00000270189 | 5.13E-15 | -2.63127 | 1 | 1 RP11-258C19.7  | --     |
| ENSG00000270190 | 5.13E-15 | -2.63127 | 1 | 1 RP11-803D5.4   | --     |
| ENSG00000270191 | 5.13E-15 | -2.63127 | 1 | 1 RP11-157B13.9  | --     |
| ENSG00000270192 | 5.13E-15 | -2.63127 | 1 | 1 MRPS35P3       | K17413 |
| ENSG00000270193 | 5.13E-15 | -2.63127 | 1 | 1 RP11-440D17.2  | K12019 |
| ENSG00000270196 | 5.13E-15 | -2.63127 | 1 | 1 RP11-550A18.1  | K15203 |
| ENSG00000270200 | 5.13E-15 | -2.63127 | 1 | 1 RP5-1136G13.1  | --     |
| ENSG00000270202 | 5.13E-15 | -2.63127 | 1 | 1 RP11-89C3.2    | --     |
| ENSG00000270204 | 5.13E-15 | -2.63127 | 1 | 1 RP11-172C16.5  | --     |
| ENSG00000270207 | 5.13E-15 | -2.63127 | 1 | 1 RP11-157E16.1  | --     |
| ENSG00000270209 | 5.13E-15 | -2.63127 | 1 | 1 RP4-592A1.4    | --     |
| ENSG00000270212 | 5.13E-15 | -2.63127 | 1 | 1 CTD-2540B15.12 | --     |
| ENSG00000270213 | 5.13E-15 | -2.63127 | 1 | 1 RP11-452D24.1  | K07887 |
| ENSG00000270218 | 5.13E-15 | -2.63127 | 1 | 1 RP11-325L12.5  | K18157 |
| ENSG00000270222 | 5.13E-15 | -2.63127 | 1 | 1 RP11-105C20.3  | --     |
| ENSG00000270225 | 5.13E-15 | -2.63127 | 1 | 1 RP11-475J5.4   | K02261 |
| ENSG00000270226 | 5.13E-15 | -2.63127 | 1 | 1 AC006548.26    | --     |
| ENSG00000270230 | 5.13E-15 | -2.63127 | 1 | 1 RP11-475J5.11  | K03884 |
| ENSG00000270232 | 5.13E-15 | -2.63127 | 1 | 1 RP11-475J5.7   | K00412 |
| ENSG00000270234 | 5.13E-15 | -2.63127 | 1 | 1 RP11-575N15.1  | --     |
| ENSG00000270235 | 5.13E-15 | -2.63127 | 1 | 1 RP11-122K13.14 | --     |
| ENSG00000270236 | 5.13E-15 | -2.63127 | 1 | 1 RP11-265B8.5   | K00944 |
| ENSG00000270237 | 5.13E-15 | -2.63127 | 1 | 1 RP11-381K20.5  | --     |
| ENSG00000270239 | 5.13E-15 | -2.63127 | 1 | 1 RP11-763B22.10 | --     |
| ENSG00000270241 | 5.13E-15 | -2.63127 | 1 | 1 RP4-657M3.2    | --     |
| ENSG00000270242 | 5.13E-15 | -2.63127 | 1 | 1 RP11-295P22.1  | K18584 |
| ENSG00000270243 | 5.13E-15 | -2.63127 | 1 | 1 RP11-779O18.4  | --     |
| ENSG00000270244 | 5.13E-15 | -2.63127 | 1 | 1 RP11-123J14.4  | --     |
| ENSG00000270246 | 5.13E-15 | -2.63127 | 1 | 1 SNORD109A      | --     |
| ENSG00000270249 | 5.13E-15 | -2.63127 | 1 | 1 RP11-514P8.7   | K17630 |
| ENSG00000270251 | 5.13E-15 | -2.63127 | 1 | 1 RP6-166C19.13  | --     |
| ENSG00000270252 | 5.13E-15 | -2.63127 | 1 | 1 IGKV3OR2-5     | --     |
| ENSG00000270258 | 5.13E-15 | -2.63127 | 1 | 1 DUXAP4         | --     |
| ENSG00000270259 | 5.13E-15 | -2.63127 | 1 | 1 RP13-122B23.9  | --     |
| ENSG00000270268 | 5.13E-15 | -2.63127 | 1 | 1 RP1-164L12.1   | --     |
| ENSG00000270270 | 5.13E-15 | -2.63127 | 1 | 1 CTC-559E9.10   | --     |
| ENSG00000270273 | 5.13E-15 | -2.63127 | 1 | 1 RP11-242C24.3  | --     |
| ENSG00000270275 | 5.13E-15 | -2.63127 | 1 | 1 RP11-53M11.4   | --     |

|                 |          |          |   |                  |        |
|-----------------|----------|----------|---|------------------|--------|
| ENSG00000270279 | 5.13E-15 | -2.63127 | 1 | 1 RP4-806M20.5   | -      |
| ENSG00000270280 | 5.13E-15 | -2.63127 | 1 | 1 RP11-265D20.1  | -      |
| ENSG00000270281 | 5.13E-15 | -2.63127 | 1 | 1 CTC-523E23.10  | K09228 |
| ENSG00000270282 | 5.13E-15 | -2.63127 | 1 | 1 RP5-1115A15.2  | K13625 |
| ENSG00000270287 | 5.13E-15 | -2.63127 | 1 | 1 RP11-118H4.3   | -      |
| ENSG00000270289 | 5.13E-15 | -2.63127 | 1 | 1 RP11-512G4.1   | -      |
| ENSG00000270292 | 5.13E-15 | -2.63127 | 1 | 1 RP11-453E17.4  | K19759 |
| ENSG00000270293 | 5.13E-15 | -2.63127 | 1 | 1 CTC-360J11.5   | -      |
| ENSG00000270294 | 5.13E-15 | -2.63127 | 1 | 1 RP11-566F5.1   | K04725 |
| ENSG00000270300 | 5.13E-15 | -2.63127 | 1 | 1 PHACTR2P1      | -      |
| ENSG00000270301 | 5.13E-15 | -2.63127 | 1 | 1 WI2-2334D6.1   | -      |
| ENSG00000270302 | 5.13E-15 | -2.63127 | 1 | 1 RP11-461L13.4  | -      |
| ENSG00000270304 | 5.13E-15 | -2.63127 | 1 | 1 RP11-597G23.1  | K11884 |
| ENSG00000270306 | 5.13E-15 | -2.63127 | 1 | 1 RP3-437C15.2   | -      |
| ENSG00000270307 | 5.13E-15 | -2.63127 | 1 | 1 MTATP6P2       | K02126 |
| ENSG00000270308 | 5.13E-15 | -2.63127 | 1 | 1 RP3-377O6.2    | -      |
| ENSG00000270313 | 5.13E-15 | -2.63127 | 1 | 1 COX6CP16       | K02268 |
| ENSG00000270316 | 5.13E-15 | -2.63127 | 1 | 1 C10orf32-ASMT  | K07755 |
| ENSG00000270317 | 5.13E-15 | -2.63127 | 1 | 1 AC004004.2     | K09066 |
| ENSG00000270318 | 5.13E-15 | -2.63127 | 1 | 1 IGHV3OR16-11   | K06856 |
| ENSG00000270321 | 5.13E-15 | -2.63127 | 1 | 1 RP11-2L8.2     | -      |
| ENSG00000270323 | 5.13E-15 | -2.63127 | 1 | 1 AP000860.2     | -      |
| ENSG00000270325 | 5.13E-15 | -2.63127 | 1 | 1 CTC-559E9.12   | -      |
| ENSG00000270326 | 5.13E-15 | -2.63127 | 1 | 1 RP5-874C20.6   | -      |
| ENSG00000270328 | 5.13E-15 | -2.63127 | 1 | 1 RP11-33E15.1   | -      |
| ENSG00000270330 | 5.13E-15 | -2.63127 | 1 | 1 RP5-892F13.2   | -      |
| ENSG00000270333 | 5.13E-15 | -2.63127 | 1 | 1 RP11-566F5.2   | -      |
| ENSG00000270335 | 5.13E-15 | -2.63127 | 1 | 1 RP11-642D6.1   | -      |
| ENSG00000270336 | 5.13E-15 | -2.63127 | 1 | 1 RP11-521F1.1   | -      |
| ENSG00000270342 | 5.13E-15 | -2.63127 | 1 | 1 RP11-478L17.1  | -      |
| ENSG00000270343 | 5.13E-15 | -2.63127 | 1 | 1 UNGP3          | K03648 |
| ENSG00000270347 | 5.13E-15 | -2.63127 | 1 | 1 CTC-339O9.2    | K14284 |
| ENSG00000270350 | 5.13E-15 | -2.63127 | 1 | 1 RP11-475J5.9   | K03882 |
| ENSG00000270352 | 5.13E-15 | -2.63127 | 1 | 1 RP11-111N20.4  | -      |
| ENSG00000270354 | 5.13E-15 | -2.63127 | 1 | 1 RP11-547M24.1  | -      |
| ENSG00000270359 | 5.13E-15 | -2.63127 | 1 | 1 RP11-2G1.3     | -      |
| ENSG00000270361 | 5.13E-15 | -2.63127 | 1 | 1 RP11-307C12.13 | -      |
| ENSG00000270367 | 5.13E-15 | -2.63127 | 1 | 1 RP11-331G2.6   | K17985 |
| ENSG00000270369 | 5.13E-15 | -2.63127 | 1 | 1 RP11-144G6.13  | -      |
| ENSG00000270371 | 5.13E-15 | -2.63127 | 1 | 1 RP11-417P24.1  | K02152 |
| ENSG00000270372 | 5.13E-15 | -2.63127 | 1 | 1 RP11-109M17.2  | -      |
| ENSG00000270375 | 5.13E-15 | -2.63127 | 1 | 1 REXO1L2P       | K14570 |
| ENSG00000270377 | 5.13E-15 | -2.63127 | 1 | 1 RP11-384L8.2   | -      |
| ENSG00000270378 | 5.13E-15 | -2.63127 | 1 | 1 RP11-108K3.5   | K02929 |
| ENSG00000270380 | 5.13E-15 | -2.63127 | 1 | 1 RP11-470L19.5  | -      |
| ENSG00000270381 | 5.13E-15 | -2.63127 | 1 | 1 RP11-290D2.5   | K02268 |
| ENSG00000270382 | 5.13E-15 | -2.63127 | 1 | 1 RP1-152L7.9    | -      |
| ENSG00000270385 | 5.13E-15 | -2.63127 | 1 | 1 GS1-21A4.2     | K02947 |
| ENSG00000270386 | 5.13E-15 | -2.63127 | 1 | 1 UGT2A1         | K00699 |
| ENSG00000270387 | 5.13E-15 | -2.63127 | 1 | 1 RP11-315D13.1  | -      |
| ENSG00000270388 | 5.13E-15 | -2.63127 | 1 | 1 RP11-475J5.8   | K02262 |
| ENSG00000270393 | 5.13E-15 | -2.63127 | 1 | 1 AC000095.9     | -      |
| ENSG00000270394 | 5.13E-15 | -2.63127 | 1 | 1 MTRNR2L13      | K01982 |
| ENSG00000270395 | 5.13E-15 | -2.63127 | 1 | 1 RP11-627K11.4  | -      |
| ENSG00000270397 | 5.13E-15 | -2.63127 | 1 | 1 RP6-166C19.16  | -      |
| ENSG00000270400 | 5.13E-15 | -2.63127 | 1 | 1 RP11-464I4.1   | K11838 |
| ENSG00000270401 | 5.13E-15 | -2.63127 | 1 | 1 RP11-812E19.14 | -      |
| ENSG00000270402 | 5.13E-15 | -2.63127 | 1 | 1 CTC-412M14.5   | K17299 |

|                 |          |          |   |                  |              |
|-----------------|----------|----------|---|------------------|--------------|
| ENSG00000270403 | 5.13E-15 | -2.63127 | 1 | 1 RP11-35P15.1   | -            |
| ENSG00000270405 | 5.13E-15 | -2.63127 | 1 | 1 RP11-208G20.3  | -            |
| ENSG00000270408 | 5.13E-15 | -2.63127 | 1 | 1 JAG1           | -            |
| ENSG00000270411 | 5.13E-15 | -2.63127 | 1 | 1 RP13-379L11.3  | -            |
| ENSG00000270412 | 5.13E-15 | -2.63127 | 1 | 1 RP11-92C4.6    | -            |
| ENSG00000270413 | 5.13E-15 | -2.63127 | 1 | 1 RP11-810O3.2   | -            |
| ENSG00000270415 | 5.13E-15 | -2.63127 | 1 | 1 DPPA3P3        | -            |
| ENSG00000270416 | 5.13E-15 | -2.63127 | 1 | 1 REXO1L12P      | K14570       |
| ENSG00000270421 | 5.13E-15 | -2.63127 | 1 | 1 RP11-351O1.4   | -            |
| ENSG00000270422 | 5.13E-15 | -2.63127 | 1 | 1 AL133247.3     | K12344       |
| ENSG00000270423 | 5.13E-15 | -2.63127 | 1 | 1 RP11-361A21.3  | -            |
| ENSG00000270424 | 5.13E-15 | -2.63127 | 1 | 1 RP11-1348G14.6 | -            |
| ENSG00000270425 | 5.13E-15 | -2.63127 | 1 | 1 CTA-369K23.1   | -            |
| ENSG00000270427 | 5.13E-15 | -2.63127 | 1 | 1 NRBF2P5        | -            |
| ENSG00000270430 | 5.13E-15 | -2.63127 | 1 | 1 RP11-42L13.3   | -            |
| ENSG00000270431 | 5.13E-15 | -2.63127 | 1 | 1 RP1-241P17.7   | K12834       |
| ENSG00000270432 | 5.13E-15 | -2.63127 | 1 | 1 OR7E108P       | K04257       |
| ENSG00000270433 | 5.13E-15 | -2.63127 | 1 | 1 RP11-124D2.7   | K11253       |
| ENSG00000270434 | 5.13E-15 | -2.63127 | 1 | 1 RP11-175I17.6  | -            |
| ENSG00000270435 | 5.13E-15 | -2.63127 | 1 | 1 RP11-304C12.4  | -            |
| ENSG00000270437 | 5.13E-15 | -2.63127 | 1 | 1 RP11-511I11.2  | -            |
| ENSG00000270440 | 5.13E-15 | -2.63127 | 1 | 1 RP11-19H6.1    | -            |
| ENSG00000270442 | 5.13E-15 | -2.63127 | 1 | 1 CTB-95D12.1    | K09566       |
| ENSG00000270443 | 5.13E-15 | -2.63127 | 1 | 1 RP1-223H12.5   | -            |
| ENSG00000270444 | 5.13E-15 | -2.63127 | 1 | 1 AZU1P1         | -            |
| ENSG00000270445 | 5.13E-15 | -2.63127 | 1 | 1 RP11-972P1.8   | K09613       |
| ENSG00000270446 | 5.13E-15 | -2.63127 | 1 | 1 RP6-43L17.1    | K02915       |
| ENSG00000270447 | 5.13E-15 | -2.63127 | 1 | 1 RP11-569H17.1  | -            |
| ENSG00000270449 | 5.13E-15 | -2.63127 | 1 | 1 RP11-681H10.1  | K11276       |
| ENSG00000270450 | 5.13E-15 | -2.63127 | 1 | 1 IGKV2OR2-7D    | -            |
| ENSG00000270451 | 5.13E-15 | -2.63127 | 1 | 1 IGHD4OR15-4B   | -            |
| ENSG00000270453 | 5.13E-15 | -2.63127 | 1 | 1 CTB-10G5.1     | K17782       |
| ENSG00000270455 | 5.13E-15 | -2.63127 | 1 | 1 PABPC1P5       | K13126       |
| ENSG00000270456 | 5.13E-15 | -2.63127 | 1 | 1 RP6-166C19.14  | -            |
| ENSG00000270457 | 5.13E-15 | -2.63127 | 1 | 1 RP11-467C18.1  | -            |
| ENSG00000270458 | 5.13E-15 | -2.63127 | 1 | 1 RP11-644F5.17  | K02987       |
| ENSG00000270460 | 5.13E-15 | -2.63127 | 1 | 1 RP11-796E10.1  | -            |
| ENSG00000270462 | 5.13E-15 | -2.63127 | 1 | 1 RP11-342K6.3   | -            |
| ENSG00000270466 | 5.13E-15 | -2.63127 | 1 | 1                | 1-Sep K13737 |
| ENSG00000270467 | 5.13E-15 | -2.63127 | 1 | 1 IGHV3OR16-12   | K06856       |
| ENSG00000270469 | 5.13E-15 | -2.63127 | 1 | 1 RP11-411B10.8  | -            |
| ENSG00000270470 | 5.13E-15 | -2.63127 | 1 | 1 RP11-601H16.1  | -            |
| ENSG00000270472 | 5.13E-15 | -2.63127 | 1 | 1 IGHV3OR16-9    | K06856       |
| ENSG00000270475 | 5.13E-15 | -2.63127 | 1 | 1 CTC-451A6.5    | -            |
| ENSG00000270477 | 5.13E-15 | -2.63127 | 1 | 1 RP1-72E17.2    | K17773       |
| ENSG00000270479 | 5.13E-15 | -2.63127 | 1 | 1 RP11-369G6.3   | K17985       |
| ENSG00000270480 | 5.13E-15 | -2.63127 | 1 | 1 RP11-57B24.1   | -            |
| ENSG00000270484 | 5.13E-15 | -2.63127 | 1 | 1 RP3-399J4.4    | -            |
| ENSG00000270487 | 5.13E-15 | -2.63127 | 1 | 1 RP11-230C9.3   | -            |
| ENSG00000270488 | 5.13E-15 | -2.63127 | 1 | 1 RP11-245G13.1  | K02912       |
| ENSG00000270491 | 5.13E-15 | -2.63127 | 1 | 1 RP4-743O11.1   | -            |
| ENSG00000270492 | 5.13E-15 | -2.63127 | 1 | 1 RP13-685P2.8   | -            |
| ENSG00000270493 | 5.13E-15 | -2.63127 | 1 | 1 RP6-166C19.22  | -            |
| ENSG00000270494 | 5.13E-15 | -2.63127 | 1 | 1 RP11-119F7.6   | -            |
| ENSG00000270495 | 5.13E-15 | -2.63127 | 1 | 1 CTD-2134P3.2   | -            |
| ENSG00000270496 | 5.13E-15 | -2.63127 | 1 | 1 BNIP3P7        | K15464       |
| ENSG00000270497 | 5.13E-15 | -2.63127 | 1 | 1 RP1-290F12.3   | -            |
| ENSG00000270499 | 5.13E-15 | -2.63127 | 1 | 1 MKI67P1        | K17582       |



|                 |          |          |   |                  |        |
|-----------------|----------|----------|---|------------------|--------|
| ENSG00000270500 | 5.13E-15 | -2.63127 | 1 | 1 COX6CP4        | K02268 |
| ENSG00000270505 | 5.13E-15 | -2.63127 | 1 | 1 IGHV1OR15-1    | K06856 |
| ENSG00000270506 | 5.13E-15 | -2.63127 | 1 | 1 RP11-511B23.4  | -      |
| ENSG00000270507 | 5.13E-15 | -2.63127 | 1 | 1 CTA-21C21.1    | -      |
| ENSG00000270509 | 5.13E-15 | -2.63127 | 1 | 1 RP11-301G19.2  | K11419 |
| ENSG00000270512 | 5.13E-15 | -2.63127 | 1 | 1 RP5-1136G2.1   | -      |
| ENSG00000270513 | 5.13E-15 | -2.63127 | 1 | 1 RP11-116B13.1  | -      |
| ENSG00000270516 | 5.13E-15 | -2.63127 | 1 | 1 RP11-500M10.1  | -      |
| ENSG00000270518 | 5.13E-15 | -2.63127 | 1 | 1 RP11-210K20.3  | K15696 |
| ENSG00000270521 | 5.13E-15 | -2.63127 | 1 | 1 RP11-24C14.1   | -      |
| ENSG00000270522 | 5.13E-15 | -2.63127 | 1 | 1 RP11-168P13.1  | -      |
| ENSG00000270523 | 5.13E-15 | -2.63127 | 1 | 1 RP11-145P16.3  | -      |
| ENSG00000270524 | 5.13E-15 | -2.63127 | 1 | 1 QTRT1P1        | -      |
| ENSG00000270526 | 5.13E-15 | -2.63127 | 1 | 1 SNRPGP19       | K11099 |
| ENSG00000270528 | 5.13E-15 | -2.63127 | 1 | 1 RP11-674I16.2  | -      |
| ENSG00000270531 | 5.13E-15 | -2.63127 | 1 | 1 RP11-169K17.2  | K13907 |
| ENSG00000270533 | 5.13E-15 | -2.63127 | 1 | 1 bP-2120IH5.1   | K02936 |
| ENSG00000270535 | 5.13E-15 | -2.63127 | 1 | 1 TCEB1P34       | -      |
| ENSG00000270538 | 5.13E-15 | -2.63127 | 1 | 1 RP11-3B7.7     | K02437 |
| ENSG00000270541 | 5.13E-15 | -2.63127 | 1 | 1 RP11-478B11.2  | -      |
| ENSG00000270542 | 5.13E-15 | -2.63127 | 1 | 1 RP11-311H10.7  | -      |
| ENSG00000270544 | 5.13E-15 | -2.63127 | 1 | 1 CTC-523E23.14  | -      |
| ENSG00000270547 | 5.13E-15 | -2.63127 | 1 | 1 RP11-536O18.2  | -      |
| ENSG00000270549 | 5.13E-15 | -2.63127 | 1 | 1 RP11-293K19.1  | -      |
| ENSG00000270552 | 5.13E-15 | -2.63127 | 1 | 1 DUXAP3         | -      |
| ENSG00000270553 | 5.13E-15 | -2.63127 | 1 | 1 RP11-15E18.5   | K12833 |
| ENSG00000270555 | 5.13E-15 | -2.63127 | 1 | 1 RP11-1394O16.1 | K15449 |
| ENSG00000270557 | 5.13E-15 | -2.63127 | 1 | 1 RP11-546J1.1   | -      |
| ENSG00000270560 | 5.13E-15 | -2.63127 | 1 | 1 APOOP1         | -      |
| ENSG00000270568 | 5.13E-15 | -2.63127 | 1 | 1 RP11-592B15.8  | -      |
| ENSG00000270569 | 5.13E-15 | -2.63127 | 1 | 1 RP11-127H13.1  | -      |
| ENSG00000270570 | 5.13E-15 | -2.63127 | 1 | 1 RP1-85D24.1    | -      |
| ENSG00000270575 | 5.13E-15 | -2.63127 | 1 | 1 RP11-21M7.2    | -      |
| ENSG00000270576 | 5.13E-15 | -2.63127 | 1 | 1 RP5-1021I20.7  | -      |
| ENSG00000270578 | 5.13E-15 | -2.63127 | 1 | 1 RP11-712B9.5   | -      |
| ENSG00000270581 | 5.13E-15 | -2.63127 | 1 | 1 RP11-811P12.3  | -      |
| ENSG00000270583 | 5.13E-15 | -2.63127 | 1 | 1 RP11-471G13.5  | -      |
| ENSG00000270584 | 5.13E-15 | -2.63127 | 1 | 1 RP11-362B23.1  | -      |
| ENSG00000270585 | 5.13E-15 | -2.63127 | 1 | 1 RP11-568G11.4  | -      |
| ENSG00000270588 | 5.13E-15 | -2.63127 | 1 | 1 RP11-810F22.1  | K19023 |
| ENSG00000270593 | 5.13E-15 | -2.63127 | 1 | 1 RP11-455J15.1  | -      |
| ENSG00000270598 | 5.13E-15 | -2.63127 | 1 | 1 RP11-396C23.3  | -      |
| ENSG00000270601 | 5.13E-15 | -2.63127 | 1 | 1 PRAMEF23       | -      |
| ENSG00000270604 | 5.13E-15 | -2.63127 | 1 | 1 HCG17          | -      |
| ENSG00000270606 | 5.13E-15 | -2.63127 | 1 | 1 RP11-713H12.2  | K03767 |
| ENSG00000270610 | 5.13E-15 | -2.63127 | 1 | 1 RP11-486O13.3  | K19193 |
| ENSG00000270611 | 5.13E-15 | -2.63127 | 1 | 1 GS1-69O6.1     | -      |
| ENSG00000270612 | 5.13E-15 | -2.63127 | 1 | 1 RP11-34P1.4    | K11097 |
| ENSG00000270614 | 5.13E-15 | -2.63127 | 1 | 1 CTC-325H20.7   | -      |
| ENSG00000270615 | 5.13E-15 | -2.63127 | 1 | 1 RP11-379C1.1   | -      |
| ENSG00000270618 | 5.13E-15 | -2.63127 | 1 | 1 RP11-388E23.4  | -      |
| ENSG00000270619 | 5.13E-15 | -2.63127 | 1 | 1 RP11-197B12.1  | K15224 |
| ENSG00000270620 | 5.13E-15 | -2.63127 | 1 | 1 RP1-134O19.3   | K02268 |
| ENSG00000270623 | 5.13E-15 | -2.63127 | 1 | 1 RP11-316M21.9  | K12947 |
| ENSG00000270624 | 5.13E-15 | -2.63127 | 1 | 1 LOC401913      | K00709 |
| ENSG00000270625 | 5.13E-15 | -2.63127 | 1 | 1 RP4-555N2.4    | K13355 |
| ENSG00000270627 | 5.13E-15 | -2.63127 | 1 | 1 RP11-216F5.1   | -      |
| ENSG00000270628 | 5.13E-15 | -2.63127 | 1 | 1 RP11-26F2.2    | K18172 |

|                 |          |          |   |                   |        |
|-----------------|----------|----------|---|-------------------|--------|
| ENSG00000270631 | 5.13E-15 | -2.63127 | 1 | 1 RP11-710N8.3    | -      |
| ENSG00000270632 | 5.13E-15 | -2.63127 | 1 | 1 RP11-340C20.3   | -      |
| ENSG00000270634 | 5.13E-15 | -2.63127 | 1 | 1 RP4-777G9.1     | K01587 |
| ENSG00000270639 | 5.13E-15 | -2.63127 | 1 | 1 RP11-307I14.4   | -      |
| ENSG00000270641 | 5.13E-15 | -2.63127 | 1 | 1 TSIX            | -      |
| ENSG00000270646 | 5.13E-15 | -2.63127 | 1 | 1 RP6-166C19.15   | -      |
| ENSG00000270648 | 5.13E-15 | -2.63127 | 1 | 1 CYP2C61P        | -      |
| ENSG00000270652 | 5.13E-15 | -2.63127 | 1 | 1 DPRXP5          | -      |
| ENSG00000270654 | 5.13E-15 | -2.63127 | 1 | 1 RP11-531P14.1   | -      |
| ENSG00000270655 | 5.13E-15 | -2.63127 | 1 | 1 RP1-20N2.7      | -      |
| ENSG00000270656 | 5.13E-15 | -2.63127 | 1 | 1 RP3-328E19.5    | -      |
| ENSG00000270659 | 5.13E-15 | -2.63127 | 1 | 1 RP11-105N14.1   | -      |
| ENSG00000270661 | 5.13E-15 | -2.63127 | 1 | 1 RP1-142L7.9     | -      |
| ENSG00000270664 | 5.13E-15 | -2.63127 | 1 | 1 RP11-544H14.1   | -      |
| ENSG00000270665 | 5.13E-15 | -2.63127 | 1 | 1 HNRNPA1P67      | K12741 |
| ENSG00000270666 | 5.13E-15 | -2.63127 | 1 | 1 XXbac-BPGBPG34I | -      |
| ENSG00000270669 | 5.13E-15 | -2.63127 | 1 | 1 CTB-179I1.3     | -      |
| ENSG00000270670 | 5.13E-15 | -2.63127 | 1 | 1 RP11-248C1.3    | K08798 |
| ENSG00000270672 | 5.13E-15 | -2.63127 | 1 | 1 MTRNR2L6        | K01982 |
| ENSG00000270677 | 5.13E-15 | -2.63127 | 1 | 1 RP11-294L11.1   | -      |
| ENSG00000270678 | 5.13E-15 | -2.63127 | 1 | 1 RP6-166C19.21   | -      |
| ENSG00000270679 | 5.13E-15 | -2.63127 | 1 | 1 CTC-512J12.7    | K02956 |
| ENSG00000270680 | 5.13E-15 | -2.63127 | 1 | 1 RP11-351N4.4    | -      |
| ENSG00000270682 | 5.13E-15 | -2.63127 | 1 | 1 KB-1907C4.2     | K02924 |
| ENSG00000270683 | 5.13E-15 | -2.63127 | 1 | 1 RP11-477G9.1    | -      |
| ENSG00000270685 | 5.13E-15 | -2.63127 | 1 | 1 IGHV1OR15-6     | K06856 |
| ENSG00000270688 | 5.13E-15 | -2.63127 | 1 | 1 RP11-507D14.4   | K18032 |
| ENSG00000270689 | 5.13E-15 | -2.63127 | 1 | 1 RP11-712B9.4    | -      |
| ENSG00000270690 | 5.13E-15 | -2.63127 | 1 | 1 RP11-349G13.3   | -      |
| ENSG00000270691 | 5.13E-15 | -2.63127 | 1 | 1 RP11-403N16.5   | K17299 |
| ENSG00000270692 | 5.13E-15 | -2.63127 | 1 | 1 RP11-89F17.5    | -      |
| ENSG00000270694 | 5.13E-15 | -2.63127 | 1 | 1 RP11-535E8.2    | -      |
| ENSG00000270695 | 5.13E-15 | -2.63127 | 1 | 1 RP1-21P18.1     | K08831 |
| ENSG00000270698 | 5.13E-15 | -2.63127 | 1 | 1 RP11-568J23.7   | K13628 |
| ENSG00000270699 | 5.13E-15 | -2.63127 | 1 | 1 RP11-292K15.1   | K02896 |
| ENSG00000270701 | 5.13E-15 | -2.63127 | 1 | 1 RP11-876F14.2   | -      |
| ENSG00000270702 | 5.13E-15 | -2.63127 | 1 | 1 RP11-107F6.4    | K02934 |
| ENSG00000270704 | 5.13E-15 | -2.63127 | 1 | 1 SNORD64         | -      |
| ENSG00000270706 | 5.13E-15 | -2.63127 | 1 | 1 CTD-2301A4.5    | K11434 |
| ENSG00000270708 | 5.13E-15 | -2.63127 | 1 | 1 RP11-568G11.5   | -      |
| ENSG00000270709 | 5.13E-15 | -2.63127 | 1 | 1 GS1-115M3.4     | K12162 |
| ENSG00000270710 | 5.13E-15 | -2.63127 | 1 | 1 RP11-293G6__B.8 | -      |
| ENSG00000270711 | 5.13E-15 | -2.63127 | 1 | 1 RP11-46A10.8    | -      |
| ENSG00000270712 | 5.13E-15 | -2.63127 | 1 | 1 RP11-378I6.2    | -      |
| ENSG00000270713 | 5.13E-15 | -2.63127 | 1 | 1 RP11-506K19.2   | -      |
| ENSG00000270714 | 5.13E-15 | -2.63127 | 1 | 1 MINOS1P2        | K17784 |
| ENSG00000270716 | 5.13E-15 | -2.63127 | 1 | 1 CTC-260E6.11    | -      |
| ENSG00000270718 | 5.13E-15 | -2.63127 | 1 | 1 RP11-421H10.2   | -      |
| ENSG00000270719 | 5.13E-15 | -2.63127 | 1 | 1 RP11-134N8.2    | K12456 |
| ENSG00000270723 | 5.13E-15 | -2.63127 | 1 | 1 RP11-401N16.1   | -      |
| ENSG00000270725 | 5.13E-15 | -2.63127 | 1 | 1 RP11-383H17.4   | -      |
| ENSG00000270726 | 5.13E-15 | -2.63127 | 1 | 1 AJ271736.10     | -      |
| ENSG00000270727 | 5.13E-15 | -2.63127 | 1 | 1 RP11-51E20.1    | -      |
| ENSG00000270729 | 5.13E-15 | -2.63127 | 1 | 1 RP4-669B10.6    | -      |
| ENSG00000270733 | 5.13E-15 | -2.63127 | 1 | 1 RP11-231P20.5   | -      |
| ENSG00000270734 | 5.13E-15 | -2.63127 | 1 | 1 RP11-719K4.7    | K14394 |
| ENSG00000270736 | 5.13E-15 | -2.63127 | 1 | 1 RP6-166C19.19   | -      |
| ENSG00000270739 | 5.13E-15 | -2.63127 | 1 | 1 RP11-608O8.2    | -      |

|                 |          |          |   |                  |        |
|-----------------|----------|----------|---|------------------|--------|
| ENSG00000270741 | 5.13E-15 | -2.63127 | 1 | 1 RP11-565F4.1   | -      |
| ENSG00000270745 | 5.13E-15 | -2.63127 | 1 | 1 RP13-324D24.1  | -      |
| ENSG00000270747 | 5.13E-15 | -2.63127 | 1 | 1 RP11-344N17.15 | -      |
| ENSG00000270748 | 5.13E-15 | -2.63127 | 1 | 1 IGKV2OR2-1     | -      |
| ENSG00000270749 | 5.13E-15 | -2.63127 | 1 | 1 RP11-368M16.10 | -      |
| ENSG00000270750 | 5.13E-15 | -2.63127 | 1 | 1 RP11-461L13.3  | -      |
| ENSG00000270751 | 5.13E-15 | -2.63127 | 1 | 1 RP11-461L13.2  | -      |
| ENSG00000270753 | 5.13E-15 | -2.63127 | 1 | 1 RP11-693I21.1  | -      |
| ENSG00000270754 | 5.13E-15 | -2.63127 | 1 | 1 NEK4P3         | -      |
| ENSG00000270759 | 5.13E-15 | -2.63127 | 1 | 1 CTD-2324A24.2  | -      |
| ENSG00000270762 | 5.13E-15 | -2.63127 | 1 | 1 FXYD6P1        | K13363 |
| ENSG00000270763 | 5.13E-15 | -2.63127 | 1 | 1 RP11-122G11.1  | -      |
| ENSG00000270764 | 5.13E-15 | -2.63127 | 1 | 1 CTB-152G17.5   | -      |
| ENSG00000270766 | 5.13E-15 | -2.63127 | 1 | 1 RP11-627K11.5  | -      |
| ENSG00000270767 | 5.13E-15 | -2.63127 | 1 | 1 RP11-733D4.2   | -      |
| ENSG00000270771 | 5.13E-15 | -2.63127 | 1 | 1 RP6-166C19.12  | -      |
| ENSG00000270773 | 5.13E-15 | -2.63127 | 1 | 1 RP13-685P2.7   | -      |
| ENSG00000270776 | 5.13E-15 | -2.63127 | 1 | 1 RP11-17G11.1   | -      |
| ENSG00000270778 | 5.13E-15 | -2.63127 | 1 | 1 BUB1P1         | -      |
| ENSG00000270779 | 5.13E-15 | -2.63127 | 1 | 1 CTD-2026D23.1  | -      |
| ENSG00000270780 | 5.13E-15 | -2.63127 | 1 | 1 RP4-590F24.1   | K02872 |
| ENSG00000270782 | 5.13E-15 | -2.63127 | 1 | 1 RP11-500K19.2  | -      |
| ENSG00000270783 | 5.13E-15 | -2.63127 | 1 | 1 IGHD3OR15-3A   | -      |
| ENSG00000270788 | 5.13E-15 | -2.63127 | 1 | 1 PDLIM1P1       | -      |
| ENSG00000270789 | 5.13E-15 | -2.63127 | 1 | 1 RP11-632K20.8  | K10582 |
| ENSG00000270790 | 5.13E-15 | -2.63127 | 1 | 1 CTC-360J11.6   | -      |
| ENSG00000270791 | 5.13E-15 | -2.63127 | 1 | 1 DPRXP6         | -      |
| ENSG00000270792 | 5.13E-15 | -2.63127 | 1 | 1 RP11-103J8.1   | -      |
| ENSG00000270793 | 5.13E-15 | -2.63127 | 1 | 1 RP11-23O13.1   | -      |
| ENSG00000270794 | 5.13E-15 | -2.63127 | 1 | 1 GS1-383H3.6    | -      |
| ENSG00000270797 | 5.13E-15 | -2.63127 | 1 | 1 RP5-1173I20.1  | -      |
| ENSG00000270798 | 5.13E-15 | -2.63127 | 1 | 1 RP11-416H1.1   | -      |
| ENSG00000270799 | 5.13E-15 | -2.63127 | 1 | 1 RP11-451F14.1  | K09276 |
| ENSG00000270802 | 5.13E-15 | -2.63127 | 1 | 1 AC005776.1     | K02889 |
| ENSG00000270807 | 5.13E-15 | -2.63127 | 1 | 1 RP13-359K18.1  | -      |
| ENSG00000270808 | 5.13E-15 | -2.63127 | 1 | 1 RP11-574K11.27 | -      |
| ENSG00000270809 | 5.13E-15 | -2.63127 | 1 | 1 CHCHD2P11      | K00901 |
| ENSG00000270810 | 5.13E-15 | -2.63127 | 1 | 1 RP11-274B21.8  | -      |
| ENSG00000270811 | 5.13E-15 | -2.63127 | 1 | 1 RP11-393K12.4  | -      |
| ENSG00000270812 | 5.13E-15 | -2.63127 | 1 | 1 CTA-326K9.1    | -      |
| ENSG00000270813 | 5.13E-15 | -2.63127 | 1 | 1 NANOGNBP3      | -      |
| ENSG00000270814 | 5.13E-15 | -2.63127 | 1 | 1 TMEM261P1      | -      |
| ENSG00000270815 | 5.13E-15 | -2.63127 | 1 | 1 RP11-56O18.1   | -      |
| ENSG00000270818 | 5.13E-15 | -2.63127 | 1 | 1 RP11-498M14.1  | -      |
| ENSG00000270822 | 5.13E-15 | -2.63127 | 1 | 1 RP11-730B22.1  | -      |
| ENSG00000270824 | 5.13E-15 | -2.63127 | 1 | 1 IGHD5OR15-5B   | -      |
| ENSG00000270826 | 5.13E-15 | -2.63127 | 1 | 1 RP1-60G11.1    | -      |
| ENSG00000270828 | 5.13E-15 | -2.63127 | 1 | 1 RP3-466P17.2   | -      |
| ENSG00000270830 | 5.13E-15 | -2.63127 | 1 | 1 RP11-317O24.3  | K02942 |
| ENSG00000270831 | 5.13E-15 | -2.63127 | 1 | 1 NF1P1          | K08052 |
| ENSG00000270832 | 5.13E-15 | -2.63127 | 1 | 1 RP1-168P16.3   | K13800 |
| ENSG00000270835 | 5.13E-15 | -2.63127 | 1 | 1 AP001425.14    | -      |
| ENSG00000270837 | 5.13E-15 | -2.63127 | 1 | 1 HNRNPDL4       | K13044 |
| ENSG00000270838 | 5.13E-15 | -2.63127 | 1 | 1 RP5-1004I9.2   | -      |
| ENSG00000270842 | 5.13E-15 | -2.63127 | 1 | 1 RP11-57B24.2   | K02976 |
| ENSG00000270850 | 5.13E-15 | -2.63127 | 1 | 1 RP11-395N6.4   | K08496 |
| ENSG00000270852 | 5.13E-15 | -2.63127 | 1 | 1 RP11-355I22.8  | -      |
| ENSG00000270855 | 5.13E-15 | -2.63127 | 1 | 1 RP11-863N1.4   | K17686 |

|                 |          |          |   |                   |        |
|-----------------|----------|----------|---|-------------------|--------|
| ENSG00000270856 | 5.13E-15 | -2.63127 | 1 | 1 RP11-429G17.2   | _      |
| ENSG00000270858 | 5.13E-15 | -2.63127 | 1 | 1 VDAC1P5         | K05862 |
| ENSG00000270859 | 5.13E-15 | -2.63127 | 1 | 1 RP11-435I3.1    | _      |
| ENSG00000270861 | 5.13E-15 | -2.63127 | 1 | 1 KB-1589B1.4     | _      |
| ENSG00000270863 | 5.13E-15 | -2.63127 | 1 | 1 RP11-434C1.3    | K14809 |
| ENSG00000270864 | 5.13E-15 | -2.63127 | 1 | 1 IGHV3OR16-6     | K06856 |
| ENSG00000270865 | 5.13E-15 | -2.63127 | 1 | 1 KB-1836B5.3     | K02870 |
| ENSG00000270866 | 5.13E-15 | -2.63127 | 1 | 1 RP11-706J10.2   | _      |
| ENSG00000270868 | 5.13E-15 | -2.63127 | 1 | 1 RP11-864G5.7    | _      |
| ENSG00000270870 | 5.13E-15 | -2.63127 | 1 | 1 GS1-531I17.2    | K10428 |
| ENSG00000270874 | 5.13E-15 | -2.63127 | 1 | 1 RP11-420K10.1   | _      |
| ENSG00000270879 | 5.13E-15 | -2.63127 | 1 | 1 RP11-210K20.4   | K17985 |
| ENSG00000270880 | 5.13E-15 | -2.63127 | 1 | 1 RP11-255E6.5    | _      |
| ENSG00000270883 | 5.13E-15 | -2.63127 | 1 | 1 RP11-461L13.5   | _      |
| ENSG00000270889 | 5.13E-15 | -2.63127 | 1 | 1 RP11-609L3.1    | K17555 |
| ENSG00000270891 | 5.13E-15 | -2.63127 | 1 | 1 RP11-499P1.1    | _      |
| ENSG00000270892 | 5.13E-15 | -2.63127 | 1 | 1 AC006077.4      | K02910 |
| ENSG00000270893 | 5.13E-15 | -2.63127 | 1 | 1 RP11-311B14.1   | K14536 |
| ENSG00000270896 | 5.13E-15 | -2.63127 | 1 | 1 XXbac-BPG170G13 | _      |
| ENSG00000270897 | 5.13E-15 | -2.63127 | 1 | 1 RP11-179A10.3   | _      |
| ENSG00000270898 | 5.13E-15 | -2.63127 | 1 | 1 ASB3            | K10325 |
| ENSG00000270900 | 5.13E-15 | -2.63127 | 1 | 1 NUDT19P4        | K13355 |
| ENSG00000270901 | 5.13E-15 | -2.63127 | 1 | 1 RP11-592P9.1    | K04257 |
| ENSG00000270902 | 5.13E-15 | -2.63127 | 1 | 1 RP11-338O1.3    | _      |
| ENSG00000270904 | 5.13E-15 | -2.63127 | 1 | 1 CTC-224D3.1     | _      |
| ENSG00000270906 | 5.13E-15 | -2.63127 | 1 | 1 RP11-475J5.6    | K03881 |
| ENSG00000270909 | 5.13E-15 | -2.63127 | 1 | 1 RP11-24B13.2    | K09488 |
| ENSG00000270912 | 5.13E-15 | -2.63127 | 1 | 1 RPS28P1         | _      |
| ENSG00000270914 | 5.13E-15 | -2.63127 | 1 | 1 RP5-1077B9.5    | K01092 |
| ENSG00000270915 | 5.13E-15 | -2.63127 | 1 | 1 RP11-27M5.1     | K11253 |
| ENSG00000270916 | 5.13E-15 | -2.63127 | 1 | 1 RP4-741O10.1    | K02870 |
| ENSG00000270920 | 5.13E-15 | -2.63127 | 1 | 1 CTA-277P6.1     | _      |
| ENSG00000270921 | 5.13E-15 | -2.63127 | 1 | 1 CICP23          | K16941 |
| ENSG00000270924 | 5.13E-15 | -2.63127 | 1 | 1 RP11-812E19.13  | _      |
| ENSG00000270927 | 5.13E-15 | -2.63127 | 1 | 1 RP11-179G8.1    | _      |
| ENSG00000270929 | 5.13E-15 | -2.63127 | 1 | 1 SRD5A3P1        | K12345 |
| ENSG00000270930 | 5.13E-15 | -2.63127 | 1 | 1 GRAMD4P8        | _      |
| ENSG00000270933 | 5.13E-15 | -2.63127 | 1 | 1 CTD-2227E11.1   | _      |
| ENSG00000270934 | 5.13E-15 | -2.63127 | 1 | 1 RP11-346C16.6   | _      |
| ENSG00000270935 | 5.13E-15 | -2.63127 | 1 | 1 XXbac-BPGBPG24C | _      |
| ENSG00000270936 | 5.13E-15 | -2.63127 | 1 | 1 RP5-879K22.1    | _      |
| ENSG00000270938 | 5.13E-15 | -2.63127 | 1 | 1 RAP2CP1         | _      |
| ENSG00000270941 | 5.13E-15 | -2.63127 | 1 | 1 RP5-966M1.5     | K00944 |
| ENSG00000270945 | 5.13E-15 | -2.63127 | 1 | 1 HSPE1P7         | K04078 |
| ENSG00000270947 | 5.13E-15 | -2.63127 | 1 | 1 AC025811.3      | _      |
| ENSG00000270953 | 5.13E-15 | -2.63127 | 1 | 1 RP11-2E11.9     | _      |
| ENSG00000270954 | 5.13E-15 | -2.63127 | 1 | 1 RP11-174B4.2    | K02998 |
| ENSG00000270955 | 5.13E-15 | -2.63127 | 1 | 1 RP11-261B23.2   | K15720 |
| ENSG00000270957 | 5.13E-15 | -2.63127 | 1 | 1 RP11-1324A7.2   | _      |
| ENSG00000270960 | 5.13E-15 | -2.63127 | 1 | 1 RP11-366M4.18   | _      |
| ENSG00000270961 | 5.13E-15 | -2.63127 | 1 | 1 IGHD5OR15-5A    | _      |
| ENSG00000270962 | 5.13E-15 | -2.63127 | 1 | 1 RP11-403I13.10  | K12845 |
| ENSG00000270965 | 5.13E-15 | -2.63127 | 1 | 1 RP11-169K19.1   | _      |
| ENSG00000270966 | 5.13E-15 | -2.63127 | 1 | 1 RP11-62H7.3     | K02963 |
| ENSG00000270969 | 5.13E-15 | -2.63127 | 1 | 1 CTD-2355J17.2   | _      |
| ENSG00000270971 | 5.13E-15 | -2.63127 | 1 | 1 REXO1L8P        | K14570 |
| ENSG00000270973 | 5.13E-15 | -2.63127 | 1 | 1 RP11-324L3.5    | K11651 |
| ENSG00000270975 | 5.13E-15 | -2.63127 | 1 | 1 RP11-723P16.3   | K12877 |

|                 |          |          |   |                  |        |
|-----------------|----------|----------|---|------------------|--------|
| ENSG00000270976 | 5.13E-15 | -2.63127 | 1 | 1 RP11-110F24.1  | -      |
| ENSG00000270978 | 5.13E-15 | -2.63127 | 1 | 1 RP11-54C4.2    | K01915 |
| ENSG00000270980 | 5.13E-15 | -2.63127 | 1 | 1 RP11-626A5.2   | K00901 |
| ENSG00000270981 | 5.13E-15 | -2.63127 | 1 | 1 RP11-550I24.3  | -      |
| ENSG00000270982 | 5.13E-15 | -2.63127 | 1 | 1 RP11-490D19.11 | -      |
| ENSG00000270988 | 5.13E-15 | -2.63127 | 1 | 1 RP11-439C15.5  | -      |
| ENSG00000270989 | 5.13E-15 | -2.63127 | 1 | 1 RP11-844P9.4   | -      |
| ENSG00000270990 | 5.13E-15 | -2.63127 | 1 | 1 RP11-632K21.6  | K15026 |
| ENSG00000270992 | 5.13E-15 | -2.63127 | 1 | 1 RP11-190G13.4  | K02905 |
| ENSG00000270993 | 5.13E-15 | -2.63127 | 1 | 1 RP11-1112G13.3 | K17908 |
| ENSG00000270994 | 5.13E-15 | -2.63127 | 1 | 1 RP11-293B7.1   | K10172 |
| ENSG00000270996 | 5.13E-15 | -2.63127 | 1 | 1 RP11-342K6.4   | -      |
| ENSG00000270997 | 5.13E-15 | -2.63127 | 1 | 1 RP11-703P11.1  | -      |
| ENSG00000270999 | 5.13E-15 | -2.63127 | 1 | 1 CH17-132F21.1  | -      |
| ENSG00000271003 | 5.13E-15 | -2.63127 | 1 | 1 RP11-440D17.1  | K12019 |
| ENSG00000271005 | 5.13E-15 | -2.63127 | 1 | 1 RP11-159L8.2   | -      |
| ENSG00000271010 | 5.13E-15 | -2.63127 | 1 | 1 CTC-539A10.7   | K12581 |
| ENSG00000271014 | 5.13E-15 | -2.63127 | 1 | 1 RP11-717A5.1   | -      |
| ENSG00000271015 | 5.13E-15 | -2.63127 | 1 | 1 IGKV2OR2-7     | -      |
| ENSG00000271021 | 5.13E-15 | -2.63127 | 1 | 1 RP5-878I13.2   | -      |
| ENSG00000271022 | 5.13E-15 | -2.63127 | 1 | 1 RP11-142I2.1   | -      |
| ENSG00000271024 | 5.13E-15 | -2.63127 | 1 | 1 HSPE1P19       | -      |
| ENSG00000271025 | 5.13E-15 | -2.63127 | 1 | 1 RP11-708L7.9   | -      |
| ENSG00000271026 | 5.13E-15 | -2.63127 | 1 | 1 KATNBL1P1      | -      |
| ENSG00000271027 | 5.13E-15 | -2.63127 | 1 | 1 RP11-463M14.1  | K01951 |
| ENSG00000271028 | 5.13E-15 | -2.63127 | 1 | 1 RP11-111A24.2  | -      |
| ENSG00000271029 | 5.13E-15 | -2.63127 | 1 | 1 RP11-849F2.10  | K02974 |
| ENSG00000271034 | 5.13E-15 | -2.63127 | 1 | 1 RP11-963H1.1   | K13157 |
| ENSG00000271035 | 5.13E-15 | -2.63127 | 1 | 1 CTD-2269E23.3  | -      |
| ENSG00000271036 | 5.13E-15 | -2.63127 | 1 | 1 CLPTM1LP1      | -      |
| ENSG00000271040 | 5.13E-15 | -2.63127 | 1 | 1 RP5-933K21.3   | -      |
| ENSG00000271041 | 5.13E-15 | -2.63127 | 1 | 1 RP6-166C19.18  | -      |
| ENSG00000271042 | 5.13E-15 | -2.63127 | 1 | 1 RP3-364H10.1   | K05741 |
| ENSG00000271043 | 5.13E-15 | -2.63127 | 1 | 1 MTRNR2L2       | K01982 |
| ENSG00000271044 | 5.13E-15 | -2.63127 | 1 | 1 RP11-255M6.1   | K10802 |
| ENSG00000271045 | 5.13E-15 | -2.63127 | 1 | 1 RP11-1113N2.4  | K03965 |
| ENSG00000271046 | 5.13E-15 | -2.63127 | 1 | 1 RP11-138I18.2  | -      |
| ENSG00000271047 | 5.13E-15 | -2.63127 | 1 | 1 RP11-760D2.12  | -      |
| ENSG00000271048 | 5.13E-15 | -2.63127 | 1 | 1 CTD-2342N23.2  | -      |
| ENSG00000271049 | 5.13E-15 | -2.63127 | 1 | 1 CTD-2553L13.7  | K09228 |
| ENSG00000271052 | 5.13E-15 | -2.63127 | 1 | 1 RP11-479I16.2  | -      |
| ENSG00000271053 | 5.13E-15 | -2.63127 | 1 | 1 RP11-97F8.1    | -      |
| ENSG00000271056 | 5.13E-15 | -2.63127 | 1 | 1 RP6-43L17.2    | -      |
| ENSG00000271057 | 5.13E-15 | -2.63127 | 1 | 1 RP11-747H12.7  | -      |
| ENSG00000271063 | 5.13E-15 | -2.63127 | 1 | 1 SNRPGP17       | K11099 |
| ENSG00000271065 | 5.13E-15 | -2.63127 | 1 | 1 RP11-607P23.1  | -      |
| ENSG00000271070 | 5.13E-15 | -2.63127 | 1 | 1 RP11-465O11.2  | -      |
| ENSG00000271071 | 5.13E-15 | -2.63127 | 1 | 1 RP11-457M11.6  | -      |
| ENSG00000271072 | 5.13E-15 | -2.63127 | 1 | 1 RP11-1007O24.4 | K17080 |
| ENSG00000271074 | 5.13E-15 | -2.63127 | 1 | 1 RP11-212J19.1  | -      |
| ENSG00000271077 | 5.13E-15 | -2.63127 | 1 | 1 AC096553.5     | -      |
| ENSG00000271078 | 5.13E-15 | -2.63127 | 1 | 1 RP13-395E19.4  | K15720 |
| ENSG00000271079 | 5.13E-15 | -2.63127 | 1 | 1 CTAGE15        | -      |
| ENSG00000271081 | 5.13E-15 | -2.63127 | 1 | 1 RP11-465K4.4   | -      |
| ENSG00000271086 | 5.13E-15 | -2.63127 | 1 | 1 NAMA           | -      |
| ENSG00000271088 | 5.13E-15 | -2.63127 | 1 | 1 RP11-497J7.4   | -      |
| ENSG00000271090 | 5.13E-15 | -2.63127 | 1 | 1 AC012531.23    | -      |
| ENSG00000271093 | 5.13E-15 | -2.63127 | 1 | 1 IGLCOR22-2     | K06554 |

|                 |          |          |   |                 |        |
|-----------------|----------|----------|---|-----------------|--------|
| ENSG00000271094 | 5.13E-15 | -2.63127 | 1 | 1 RP3-380C13.2  | -      |
| ENSG00000271095 | 5.13E-15 | -2.63127 | 1 | 1 AC003973.6    | K17985 |
| ENSG00000271096 | 5.13E-15 | -2.63127 | 1 | 1 SUMO2P14      | -      |
| ENSG00000271097 | 5.13E-15 | -2.63127 | 1 | 1 RP11-223J6.1  | K06629 |
| ENSG00000271098 | 5.13E-15 | -2.63127 | 1 | 1 RP5-1125K23.1 | K09647 |
| ENSG00000271099 | 5.13E-15 | -2.63127 | 1 | 1 RP11-809N15.3 | K15696 |
| ENSG00000271101 | 5.13E-15 | -2.63127 | 1 | 1 RP11-1003J3.1 | K13199 |
| ENSG00000271105 | 5.13E-15 | -2.63127 | 1 | 1 SCML2P2       | -      |
| ENSG00000271108 | 5.13E-15 | -2.63127 | 1 | 1 KATNBL1P5     | -      |
| ENSG00000271109 | 5.13E-15 | -2.63127 | 1 | 1 CTC-523E23.11 | -      |
| ENSG00000271111 | 5.13E-15 | -2.63127 | 1 | 1 RP11-409K15.1 | -      |
| ENSG00000271113 | 5.13E-15 | -2.63127 | 1 | 1 RP11-159H10.4 | -      |
| ENSG00000271114 | 5.13E-15 | -2.63127 | 1 | 1 RP11-453D21.1 | -      |
| ENSG00000271115 | 5.13E-15 | -2.63127 | 1 | 1 RP11-443I9.1  | K03238 |
| ENSG00000271117 | 5.13E-15 | -2.63127 | 1 | 1 RP11-377H23.1 | -      |
| ENSG00000271118 | 5.13E-15 | -2.63127 | 1 | 1 RP11-175E9.2  | K03257 |
| ENSG00000271123 | 5.13E-15 | -2.63127 | 1 | 1 TCEB1P5       | -      |
| ENSG00000271128 | 5.13E-15 | -2.63127 | 1 | 1 CTB-113I20.1  | -      |
| ENSG00000271129 | 5.13E-15 | -2.63127 | 1 | 1 RP11-123C5.5  | K01520 |
| ENSG00000271130 | 5.13E-15 | -2.63127 | 1 | 1 IGHV3OR16-8   | K06856 |
| ENSG00000271131 | 5.13E-15 | -2.63127 | 1 | 1 RP11-33A14.3  | K03767 |
| ENSG00000271134 | 5.13E-15 | -2.63127 | 1 | 1 RP11-416L21.2 | K06566 |
| ENSG00000271136 | 5.13E-15 | -2.63127 | 1 | 1 RP11-320J16.1 | -      |
| ENSG00000271137 | 5.13E-15 | -2.63127 | 1 | 1 RP5-966M1.4   | -      |
| ENSG00000271138 | 5.13E-15 | -2.63127 | 1 | 1 IGLVIVOR22-1  | K06553 |
| ENSG00000271140 | 5.13E-15 | -2.63127 | 1 | 1 PRR20FP       | -      |
| ENSG00000271142 | 5.13E-15 | -2.63127 | 1 | 1 YWHAQP7       | K16197 |
| ENSG00000271143 | 5.13E-15 | -2.63127 | 1 | 1 RP11-12L8.2   | -      |
| ENSG00000271146 | 5.13E-15 | -2.63127 | 1 | 1 RP11-479F13.1 | K15464 |
| ENSG00000271147 | 5.13E-15 | -2.63127 | 1 | 1 RP4-769N13.6  | -      |
| ENSG00000271148 | 5.13E-15 | -2.63127 | 1 | 1 RP11-401N18.1 | -      |
| ENSG00000271149 | 5.13E-15 | -2.63127 | 1 | 1 CTC-457E21.10 | -      |
| ENSG00000271150 | 5.13E-15 | -2.63127 | 1 | 1 CTD-2571L23.9 | K02893 |
| ENSG00000271154 | 5.13E-15 | -2.63127 | 1 | 1 RP6-166C19.23 | -      |
| ENSG00000271156 | 5.13E-15 | -2.63127 | 1 | 1 RP11-642C5.1  | -      |
| ENSG00000271157 | 5.13E-15 | -2.63127 | 1 | 1 RP1-249C1.1   | -      |
| ENSG00000271158 | 5.13E-15 | -2.63127 | 1 | 1 RP11-265D19.7 | K15443 |
| ENSG00000271159 | 5.13E-15 | -2.63127 | 1 | 1 GS1-200K5.1   | K02503 |
| ENSG00000271162 | 5.13E-15 | -2.63127 | 1 | 1 RP1-57E3.1    | -      |
| ENSG00000271163 | 5.13E-15 | -2.63127 | 1 | 1 RP4-607J2.1   | -      |
| ENSG00000271164 | 5.13E-15 | -2.63127 | 1 | 1 RP4-789D17.4  | -      |
| ENSG00000271166 | 5.13E-15 | -2.63127 | 1 | 1 RP11-409O11.3 | K02564 |
| ENSG00000271167 | 5.13E-15 | -2.63127 | 1 | 1 LINC01109     | -      |
| ENSG00000271171 | 5.13E-15 | -2.63127 | 1 | 1 CTC-523E23.15 | -      |
| ENSG00000271172 | 5.13E-15 | -2.63127 | 1 | 1 RP11-660M5.1  | -      |
| ENSG00000271173 | 5.13E-15 | -2.63127 | 1 | 1 RP11-272J7.6  | -      |
| ENSG00000271174 | 5.13E-15 | -2.63127 | 1 | 1 RP11-814M22.2 | -      |
| ENSG00000271175 | 5.13E-15 | -2.63127 | 1 | 1 RP11-434J24.3 | K08820 |
| ENSG00000271177 | 5.13E-15 | -2.63127 | 1 | 1 RP11-575G13.3 | -      |
| ENSG00000271178 | 5.13E-15 | -2.63127 | 1 | 1 IGHV3OR16-13  | K06856 |
| ENSG00000271179 | 5.13E-15 | -2.63127 | 1 | 1 RP11-629P16.1 | K15464 |
| ENSG00000271180 | 5.13E-15 | -2.63127 | 1 | 1 RP11-665C16.8 | K02264 |
| ENSG00000271182 | 5.13E-15 | -2.63127 | 1 | 1 RP11-678G14.5 | K14398 |
| ENSG00000271184 | 5.13E-15 | -2.63127 | 1 | 1 RP4-800O15.3  | -      |
| ENSG00000271187 | 5.13E-15 | -2.63127 | 1 | 1 RP11-309H21.4 | -      |
| ENSG00000271190 | 5.13E-15 | -2.63127 | 1 | 1 RPP40P2       | K14530 |
| ENSG00000271192 | 5.13E-15 | -2.63127 | 1 | 1 RP4-555D20.3  | -      |
| ENSG00000271194 | 5.13E-15 | -2.63127 | 1 | 1 RP11-476O21.1 | -      |

|                 |          |          |   |                   |        |
|-----------------|----------|----------|---|-------------------|--------|
| ENSG00000271195 | 5.13E-15 | -2.63127 | 1 | 1 RP11-162I7.2    | K06689 |
| ENSG00000271196 | 5.13E-15 | -2.63127 | 1 | 1 RP11-461O14.3   | K16609 |
| ENSG00000271197 | 5.13E-15 | -2.63127 | 1 | 1 IGHD2OR15-2A    | -      |
| ENSG00000271198 | 5.13E-15 | -2.63127 | 1 | 1 VDAC3P1         | K15041 |
| ENSG00000271201 | 5.13E-15 | -2.63127 | 1 | 1 AB019440.50     | -      |
| ENSG00000271202 | 5.13E-15 | -2.63127 | 1 | 1 RP11-122C21.4   | -      |
| ENSG00000271204 | 5.13E-15 | -2.63127 | 1 | 1 RP11-138A9.1    | -      |
| ENSG00000271205 | 5.13E-15 | -2.63127 | 1 | 1 RP1-138A5.2     | -      |
| ENSG00000271207 | 5.13E-15 | -2.63127 | 1 | 1 RP11-475J5.5    | K02256 |
| ENSG00000271208 | 5.13E-15 | -2.63127 | 1 | 1 RP1-142L7.8     | -      |
| ENSG00000271209 | 5.13E-15 | -2.63127 | 1 | 1 RP13-40J16.1    | K11724 |
| ENSG00000271211 | 5.13E-15 | -2.63127 | 1 | 1 RP6-166C19.20   | -      |
| ENSG00000271215 | 5.13E-15 | -2.63127 | 1 | 1 RP11-180M15.5   | K02889 |
| ENSG00000271216 | 5.13E-15 | -2.63127 | 1 | 1 LINC01050       | -      |
| ENSG00000271217 | 5.13E-15 | -2.63127 | 1 | 1 RP11-301J7.9    | -      |
| ENSG00000271219 | 5.13E-15 | -2.63127 | 1 | 1 RP11-369K17.2   | K00621 |
| ENSG00000271220 | 5.13E-15 | -2.63127 | 1 | 1 RP11-478H13.4   | -      |
| ENSG00000271222 | 5.13E-15 | -2.63127 | 1 | 1 RP11-1072C15.7  | -      |
| ENSG00000271223 | 5.13E-15 | -2.63127 | 1 | 1 RP6-137J22.3    | -      |
| ENSG00000271226 | 5.13E-15 | -2.63127 | 1 | 1 IGKV2OR2-10     | -      |
| ENSG00000271230 | 5.13E-15 | -2.63127 | 1 | 1 CTD-2195M18.2   | -      |
| ENSG00000271231 | 5.13E-15 | -2.63127 | 1 | 1 KRT18P9         | K07604 |
| ENSG00000271232 | 5.13E-15 | -2.63127 | 1 | 1 RP11-317N6.1    | K01883 |
| ENSG00000271234 | 5.13E-15 | -2.63127 | 1 | 1 RP5-894D12.4    | -      |
| ENSG00000271235 | 5.13E-15 | -2.63127 | 1 | 1 RP11-1037D22.1  | -      |
| ENSG00000271238 | 5.13E-15 | -2.63127 | 1 | 1 RP11-510D21.2   | -      |
| ENSG00000271239 | 5.13E-15 | -2.63127 | 1 | 1 RP11-238F2.1    | -      |
| ENSG00000271240 | 5.13E-15 | -2.63127 | 1 | 1 RP11-157E21.2   | K08857 |
| ENSG00000271242 | 5.13E-15 | -2.63127 | 1 | 1 SLMO2P2         | -      |
| ENSG00000271243 | 5.13E-15 | -2.63127 | 1 | 1 RP11-355B11.1   | -      |
| ENSG00000271245 | 5.13E-15 | -2.63127 | 1 | 1 RP4-761I2.5     | -      |
| ENSG00000271248 | 5.13E-15 | -2.63127 | 1 | 1 RP11-745K9.2    | -      |
| ENSG00000271249 | 5.13E-15 | -2.63127 | 1 | 1 RP11-424I3.1    | -      |
| ENSG00000271250 | 5.13E-15 | -2.63127 | 1 | 1 RP11-101P17.14  | K02915 |
| ENSG00000271251 | 5.13E-15 | -2.63127 | 1 | 1 RP11-543F8.3    | -      |
| ENSG00000271253 | 5.13E-15 | -2.63127 | 1 | 1 CTD-2320J21.1   | K11511 |
| ENSG00000271255 | 5.13E-15 | -2.63127 | 1 | 1 IGHD3OR15-3B    | -      |
| ENSG00000271257 | 5.13E-15 | -2.63127 | 1 | 1 CTD-2117L12.3   | -      |
| ENSG00000271263 | 5.13E-15 | -2.63127 | 1 | 1 RP11-450H5.4    | -      |
| ENSG00000271264 | 5.13E-15 | -2.63127 | 1 | 1 RP11-558F24.6   | K18633 |
| ENSG00000271265 | 5.13E-15 | -2.63127 | 1 | 1 RP11-230C9.4    | -      |
| ENSG00000271266 | 5.13E-15 | -2.63127 | 1 | 1 RP11-728B21.3   | K12387 |
| ENSG00000271269 | 5.13E-15 | -2.63127 | 1 | 1 RP11-317P15.6   | -      |
| ENSG00000271271 | 5.13E-15 | -2.63127 | 1 | 1 UGT2A2          | K00699 |
| ENSG00000271272 | 5.13E-15 | -2.63127 | 1 | 1 RP11-510P12.1   | -      |
| ENSG00000271275 | 5.13E-15 | -2.63127 | 1 | 1 AC007326.9      | -      |
| ENSG00000271277 | 5.13E-15 | -2.63127 | 1 | 1 RP11-82O2.2     | -      |
| ENSG00000271278 | 5.13E-15 | -2.63127 | 1 | 1 TCEB1P33        | K12581 |
| ENSG00000271283 | 5.13E-15 | -2.63127 | 1 | 1 CTC-412M14.6    | K13628 |
| ENSG00000271284 | 5.13E-15 | -2.63127 | 1 | 1 RP11-465O11.1   | -      |
| ENSG00000271286 | 5.13E-15 | -2.63127 | 1 | 1 LLOXNC01-39B3.1 | -      |
| ENSG00000271287 | 5.13E-15 | -2.63127 | 1 | 1 BCRP9           | K08878 |
| ENSG00000271288 | 5.13E-15 | -2.63127 | 1 | 1 IGHV1OR15-3     | -      |
| ENSG00000271290 | 5.13E-15 | -2.63127 | 1 | 1 RP11-345E19.2   | K12181 |
| ENSG00000271291 | 5.13E-15 | -2.63127 | 1 | 1 RP11-289I10.3   | -      |
| ENSG00000271296 | 5.13E-15 | -2.63127 | 1 | 1 RP11-432M8.20   | K11253 |
| ENSG00000271298 | 5.13E-15 | -2.63127 | 1 | 1 RP5-1012F16.2   | K12456 |
| ENSG00000271299 | 5.13E-15 | -2.63127 | 1 | 1 CTD-2356P16.6   | K01611 |

|                 |          |          |   |                  |        |
|-----------------|----------|----------|---|------------------|--------|
| ENSG00000271302 | 5.13E-15 | -2.63127 | 1 | 1 RP11-647P12.2  | --     |
| ENSG00000271304 | 5.13E-15 | -2.63127 | 1 | 1 DPRXP2         | --     |
| ENSG00000271305 | 5.13E-15 | -2.63127 | 1 | 1 IGHD2OR15-2B   | --     |
| ENSG00000271306 | 5.13E-15 | -2.63127 | 1 | 1 RP11-678B3.3   | --     |
| ENSG00000271307 | 5.13E-15 | -2.63127 | 1 | 1 AF146191.8     | --     |
| ENSG00000271309 | 5.13E-15 | -2.63127 | 1 | 1 RP1-85D24.2    | --     |
| ENSG00000271313 | 5.13E-15 | -2.63127 | 1 | 1 RP11-736G13.2  | --     |
| ENSG00000271315 | 5.13E-15 | -2.63127 | 1 | 1 WI2-2221J1.1   | --     |
| ENSG00000271317 | 5.13E-15 | -2.63127 | 1 | 1 IGHD4OR15-4A   | --     |
| ENSG00000271318 | 5.13E-15 | -2.63127 | 1 | 1 AP000654.5     | --     |
| ENSG00000271320 | 5.13E-15 | -2.63127 | 1 | 1 RP11-1152H14.1 | --     |
| ENSG00000271322 | 5.13E-15 | -2.63127 | 1 | 1 RP11-390F10.3  | --     |
| ENSG00000271328 | 5.13E-15 | -2.63127 | 1 | 1 RP11-157D6.1   | --     |
| ENSG00000271329 | 5.13E-15 | -2.63127 | 1 | 1 RP5-891H21.5   | K17776 |
| ENSG00000271330 | 5.13E-15 | -2.63127 | 1 | 1 CTA-298G8.2    | --     |
| ENSG00000271332 | 5.13E-15 | -2.63127 | 1 | 1 RP11-797J4.1   | K02140 |
| ENSG00000271333 | 5.13E-15 | -2.63127 | 1 | 1 RP11-382B18.5  | K10582 |
| ENSG00000271336 | 5.13E-15 | -2.63127 | 1 | 1 IGHD1OR15-1A   | --     |
| ENSG00000271338 | 5.13E-15 | -2.63127 | 1 | 1 RP11-96J19.4   | K12866 |
| ENSG00000271339 | 5.13E-15 | -2.63127 | 1 | 1 RP11-1114A5.6  | --     |
| ENSG00000271340 | 5.13E-15 | -2.63127 | 1 | 1 CTD-2526A2.6   | --     |
| ENSG00000271343 | 5.13E-15 | -2.63127 | 1 | 1 RP11-435O11.5  | --     |
| ENSG00000271344 | 5.13E-15 | -2.63127 | 1 | 1 RP11-274B21.9  | --     |
| ENSG00000271346 | 5.13E-15 | -2.63127 | 1 | 1 RP1-321E8.4    | --     |
| ENSG00000271347 | 5.13E-15 | -2.63127 | 1 | 1 RP11-701H24.7  | --     |
| ENSG00000271349 | 5.13E-15 | -2.63127 | 1 | 1 RP11-44N17.2   | --     |
| ENSG00000271350 | 5.13E-15 | -2.63127 | 1 | 1 CTD-2384B9.1   | K01551 |
| ENSG00000271351 | 5.13E-15 | -2.63127 | 1 | 1 IGKV1OR2-9     | --     |
| ENSG00000271353 | 5.13E-15 | -2.63127 | 1 | 1 RP11-179H18.8  | --     |
| ENSG00000271355 | 5.13E-15 | -2.63127 | 1 | 1 RP4-666O22.3   | --     |
| ENSG00000271356 | 5.13E-15 | -2.63127 | 1 | 1 RP11-335E8.1   | --     |
| ENSG00000271357 | 5.13E-15 | -2.63127 | 1 | 1 RP11-843B15.3  | --     |
| ENSG00000271358 | 5.13E-15 | -2.63127 | 1 | 1 RP11-241N4.2   | K11836 |
| ENSG00000271360 | 5.13E-15 | -2.63127 | 1 | 1 RP11-138I18.1  | --     |
| ENSG00000271362 | 5.13E-15 | -2.63127 | 1 | 1 RP3-468B3.4    | K17299 |
| ENSG00000271364 | 5.13E-15 | -2.63127 | 1 | 1 RP11-81A1.8    | --     |
| ENSG00000271365 | 5.13E-15 | -2.63127 | 1 | 1 RP1-85D24.3    | --     |
| ENSG00000271366 | 5.13E-15 | -2.63127 | 1 | 1 AC002128.5     | --     |
| ENSG00000271368 | 5.13E-15 | -2.63127 | 1 | 1 RP11-10E6.1    | --     |
| ENSG00000271369 | 5.13E-15 | -2.63127 | 1 | 1 RP11-350D17.3  | K03964 |
| ENSG00000271373 | 5.13E-15 | -2.63127 | 1 | 1 NANOGP3        | K10164 |
| ENSG00000271375 | 5.13E-15 | -2.63127 | 1 | 1 RP11-295P22.2  | --     |
| ENSG00000271377 | 5.13E-15 | -2.63127 | 1 | 1 RP11-33I11.3   | K06566 |
| ENSG00000271378 | 5.13E-15 | -2.63127 | 1 | 1 CTD-2284O10.3  | --     |
| ENSG00000271379 | 5.13E-15 | -2.63127 | 1 | 1 RP11-440G2.2   | --     |
| ENSG00000271381 | 5.13E-15 | -2.63127 | 1 | 1 REXO1L9P       | K14570 |
| ENSG00000271382 | 5.13E-15 | -2.63127 | 1 | 1 RP11-1060G2.2  | --     |
| ENSG00000271384 | 5.13E-15 | -2.63127 | 1 | 1 RP11-435O5.7   | --     |
| ENSG00000271385 | 5.13E-15 | -2.63127 | 1 | 1 RP11-108M11.3  | --     |
| ENSG00000271386 | 5.13E-15 | -2.63127 | 1 | 1 SRGNP1         | --     |
| ENSG00000271389 | 5.13E-15 | -2.63127 | 1 | 1 OSBPL9P1       | --     |
| ENSG00000271390 | 5.13E-15 | -2.63127 | 1 | 1 RP11-89C3.3    | --     |
| ENSG00000271395 | 5.13E-15 | -2.63127 | 1 | 1 RP11-75N6.3    | --     |
| ENSG00000271396 | 5.13E-15 | -2.63127 | 1 | 1 RP11-697E2.9   | K14838 |
| ENSG00000271397 | 5.13E-15 | -2.63127 | 1 | 1 RP5-1128N12.2  | K18754 |
| ENSG00000271398 | 5.13E-15 | -2.63127 | 1 | 1 RP5-1092A3.5   | --     |
| ENSG00000271399 | 5.13E-15 | -2.63127 | 1 | 1 RP4-799G3.2    | --     |
| ENSG00000271400 | 5.13E-15 | -2.63127 | 1 | 1 RP13-266I11.1  | --     |



|                 |          |          |   |                 |        |
|-----------------|----------|----------|---|-----------------|--------|
| ENSG00000271401 | 5.13E-15 | -2.63127 | 1 | 1 RP11-171I2.3  | --     |
| ENSG00000271402 | 5.13E-15 | -2.63127 | 1 | 1 IGKV2OR2-2    | --     |
| ENSG00000271408 | 5.13E-15 | -2.63127 | 1 | 1 RP11-186O14.7 | --     |
| ENSG00000271409 | 5.13E-15 | -2.63127 | 1 | 1 RP11-432J9.3  | --     |
| ENSG00000271412 | 5.13E-15 | -2.63127 | 1 | 1 AP000892.8    | --     |
| ENSG00000271413 | 5.13E-15 | -2.63127 | 1 | 1 RP11-809F4.4  | --     |
| ENSG00000271417 | 5.13E-15 | -2.63127 | 1 | 1 RP11-909M7.3  | --     |
| ENSG00000271418 | 5.13E-15 | -2.63127 | 1 | 1 RP11-582E3.5  | --     |
| ENSG00000271419 | 5.13E-15 | -2.63127 | 1 | 1 RP4-591B8.3   | K15374 |
| ENSG00000271420 | 5.13E-15 | -2.63127 | 1 | 1 RP5-1057J7.7  | --     |
| ENSG00000271421 | 5.13E-15 | -2.63127 | 1 | 1 RP1-269O5.3   | --     |
| ENSG00000271423 | 5.13E-15 | -2.63127 | 1 | 1 CYCSP1        | K08738 |
| ENSG00000271426 | 5.13E-15 | -2.63127 | 1 | 1 RP4-718P11.1  | --     |
| ENSG00000271428 | 5.13E-15 | -2.63127 | 1 | 1 RP1-224A6.8   | --     |
| ENSG00000271429 | 5.13E-15 | -2.63127 | 1 | 1 RPL17P51      | K02880 |
| ENSG00000271433 | 5.13E-15 | -2.63127 | 1 | 1 PPATP2        | --     |
| ENSG00000271434 | 5.13E-15 | -2.63127 | 1 | 1 RP13-238F13.3 | --     |
| ENSG00000271435 | 5.13E-15 | -2.63127 | 1 | 1 RP11-803A13.1 | --     |
| ENSG00000271439 | 5.13E-15 | -2.63127 | 1 | 1 RP11-666A1.7  | --     |
| ENSG00000271440 | 5.13E-15 | -2.63127 | 1 | 1 RP11-373N24.2 | --     |
| ENSG00000271454 | 5.13E-15 | -2.63127 | 1 | 1 RP11-290L7.5  | K09488 |
| ENSG00000271455 | 5.13E-15 | -2.63127 | 1 | 1 RP11-269M20.2 | --     |
| ENSG00000271456 | 5.13E-15 | -2.63127 | 1 | 1 CTC-661I16.2  | --     |
| ENSG00000271457 | 5.13E-15 | -2.63127 | 1 | 1 RP11-192B18.1 | --     |
| ENSG00000271459 | 5.13E-15 | -2.63127 | 1 | 1 RP4-560B9.6   | --     |
| ENSG00000271461 | 5.13E-15 | -2.63127 | 1 | 1 RP4-673D20.6  | K16769 |
| ENSG00000271462 | 5.13E-15 | -2.63127 | 1 | 1 RP11-841C19.4 | K15604 |
| ENSG00000271464 | 5.13E-15 | -2.63127 | 1 | 1 DPRXP7        | --     |
| ENSG00000271465 | 5.13E-15 | -2.63127 | 1 | 1 SQSTM1P1      | --     |
| ENSG00000271466 | 5.13E-15 | -2.63127 | 1 | 1 CICIP24       | K16941 |
| ENSG00000271468 | 5.13E-15 | -2.63127 | 1 | 1 RP11-14N4.1   | --     |
| ENSG00000271474 | 5.13E-15 | -2.63127 | 1 | 1 RP11-710C12.1 | --     |
| ENSG00000271475 | 5.13E-15 | -2.63127 | 1 | 1 RP4-799G3.1   | --     |
| ENSG00000271477 | 5.13E-15 | -2.63127 | 1 | 1 CTC-447K7.1   | --     |
| ENSG00000271480 | 5.13E-15 | -2.63127 | 1 | 1 RP11-475J5.10 | K03880 |
| ENSG00000271482 | 5.13E-15 | -2.63127 | 1 | 1 CTB-152G17.4  | K03386 |
| ENSG00000271483 | 5.13E-15 | -2.63127 | 1 | 1 RP11-384A12.1 | --     |
| ENSG00000271486 | 5.13E-15 | -2.63127 | 1 | 1 AP000403.3    | --     |
| ENSG00000271488 | 5.13E-15 | -2.63127 | 1 | 1 RP1-55C23.8   | --     |
| ENSG00000271491 | 5.13E-15 | -2.63127 | 1 | 1 RP11-787P24.4 | --     |
| ENSG00000271492 | 5.13E-15 | -2.63127 | 1 | 1 MEMO1P5       | --     |
| ENSG00000271494 | 5.13E-15 | -2.63127 | 1 | 1 CTB-23I7.3    | --     |
| ENSG00000271495 | 5.13E-15 | -2.63127 | 1 | 1 RP11-666O2.1  | --     |
| ENSG00000271496 | 5.13E-15 | -2.63127 | 1 | 1 SNRPGP20      | --     |
| ENSG00000271498 | 5.13E-15 | -2.63127 | 1 | 1 RP11-505K1.1  | --     |
| ENSG00000271499 | 5.13E-15 | -2.63127 | 1 | 1 CTC-559E9.9   | K17923 |
| ENSG00000271502 | 5.13E-15 | -2.63127 | 1 | 1 RP6-166C19.17 | --     |
| ENSG00000271507 | 5.13E-15 | -2.63127 | 1 | 1 RP11-603B24.6 | K06856 |
| ENSG00000271508 | 5.13E-15 | -2.63127 | 1 | 1 RP11-73B8.3   | --     |
| ENSG00000271509 | 5.13E-15 | -2.63127 | 1 | 1 RP11-382A18.3 | --     |
| ENSG00000271519 | 5.13E-15 | -2.63127 | 1 | 1 RP11-307A17.2 | K17985 |
| ENSG00000271522 | 5.13E-15 | -2.63127 | 1 | 1 RP11-36B6.1   | --     |
| ENSG00000271523 | 5.13E-15 | -2.63127 | 1 | 1 RP4-576H24.5  | --     |
| ENSG00000271524 | 5.13E-15 | -2.63127 | 1 | 1 CTC-260E6.10  | --     |
| ENSG00000271525 | 5.13E-15 | -2.63127 | 1 | 1 RP11-349K21.1 | K07939 |
| ENSG00000271526 | 5.13E-15 | -2.63127 | 1 | 1 RP4-668E10.2  | --     |
| ENSG00000271527 | 5.13E-15 | -2.63127 | 1 | 1 RP11-7G12.2   | --     |
| ENSG00000271530 | 5.13E-15 | -2.63127 | 1 | 1 RP1-24O22.5   | --     |

|                 |          |          |   |                    |        |
|-----------------|----------|----------|---|--------------------|--------|
| ENSG00000271536 | 5.13E-15 | -2.63127 | 1 | 1 RP11-51I5.1      | K18932 |
| ENSG00000271538 | 5.13E-15 | -2.63127 | 1 | 1 RP11-326I11.4    | -      |
| ENSG00000271543 | 5.13E-15 | -2.63127 | 1 | 1 RP11-692M12.5    | K02934 |
| ENSG00000271544 | 5.13E-15 | -2.63127 | 1 | 1 AC006499.9       | -      |
| ENSG00000271546 | 5.13E-15 | -2.63127 | 1 | 1 RP4-725K1.1      | -      |
| ENSG00000271547 | 5.13E-15 | -2.63127 | 1 | 1 RP11-579D7.8     | -      |
| ENSG00000271558 | 5.13E-15 | -2.63127 | 1 | 1 RP11-445P19.2    | -      |
| ENSG00000271559 | 5.13E-15 | -2.63127 | 1 | 1 RP11-380N8.6     | -      |
| ENSG00000271560 | 5.13E-15 | -2.63127 | 1 | 1 KB-1410C5.4      | K02924 |
| ENSG00000271563 | 5.13E-15 | -2.63127 | 1 | 1 HIRAP1           | -      |
| ENSG00000271564 | 5.13E-15 | -2.63127 | 1 | 1 RP13-444H2.1     | -      |
| ENSG00000271565 | 5.13E-15 | -2.63127 | 1 | 1 RP4-775C13.2     | -      |
| ENSG00000271568 | 5.13E-15 | -2.63127 | 1 | 1 RP11-632K21.7    | -      |
| ENSG00000271569 | 5.13E-15 | -2.63127 | 1 | 1 IGKV1OR2-6       | -      |
| ENSG00000271573 | 5.13E-15 | -2.63127 | 1 | 1 RP11-96C23.12    | -      |
| ENSG00000271578 | 5.13E-15 | -2.63127 | 1 | 1 RP5-1033H2.1     | -      |
| ENSG00000271579 | 5.13E-15 | -2.63127 | 1 | 1 RP11-116D17.3    | -      |
| ENSG00000271581 | 5.13E-15 | -2.63127 | 1 | 1 XXbac-BPG248L24. | K06751 |
| ENSG00000271582 | 5.13E-15 | -2.63127 | 1 | 1 RP11-511P7.4     | -      |
| ENSG00000271583 | 5.13E-15 | -2.63127 | 1 | 1 RP11-638D14.1    | -      |
| ENSG00000271584 | 5.13E-15 | -2.63127 | 1 | 1 RP11-89C3.4      | -      |
| ENSG00000271585 | 5.13E-15 | -2.63127 | 1 | 1 CTB-88F18.4      | -      |
| ENSG00000271587 | 5.13E-15 | -2.63127 | 1 | 1 GS1-531I17.3     | K02993 |
| ENSG00000271588 | 5.13E-15 | -2.63127 | 1 | 1 RP11-435P24.3    | K15191 |
| ENSG00000271589 | 5.13E-15 | -2.63127 | 1 | 1 RP11-130N24.2    | -      |
| ENSG00000271593 | 5.13E-15 | -2.63127 | 1 | 1 RP11-335E6.4     | -      |
| ENSG00000271594 | 5.13E-15 | -2.63127 | 1 | 1 RP11-277L2.6     | -      |
| ENSG00000271595 | 5.13E-15 | -2.63127 | 1 | 1 TCEB1P35         | K03872 |
| ENSG00000271596 | 5.13E-15 | -2.63127 | 1 | 1 RP11-407N8.4     | K13120 |
| ENSG00000271597 | 5.13E-15 | -2.63127 | 1 | 1 RP11-85D18.1     | -      |
| ENSG00000271598 | 5.13E-15 | -2.63127 | 1 | 1 CTD-2542C24.9    | -      |
| ENSG00000271602 | 5.13E-15 | -2.63127 | 1 | 1 KRT8P49          | K07605 |
| ENSG00000271605 | 5.13E-15 | -2.63127 | 1 | 1 MILR1            | K02927 |
| ENSG00000271606 | 5.13E-15 | -2.63127 | 1 | 1 RP11-27G13.5     | -      |
| ENSG00000271608 | 5.13E-15 | -2.63127 | 1 | 1 RP11-697G4.4     | -      |
| ENSG00000271609 | 5.13E-15 | -2.63127 | 1 | 1 CTB-31N19.4      | K02947 |
| ENSG00000271611 | 5.13E-15 | -2.63127 | 1 | 1 RP4-813F11.3     | -      |
| ENSG00000271612 | 5.13E-15 | -2.63127 | 1 | 1 HSPE1P14         | K04078 |
| ENSG00000271615 | 5.13E-15 | -2.63127 | 1 | 1 CTD-2026C7.1     | K05692 |
| ENSG00000271616 | 5.13E-15 | -2.63127 | 1 | 1 RP11-578F21.13   | K18172 |
| ENSG00000271618 | 5.13E-15 | -2.63127 | 1 | 1 RP11-175G14.2    | -      |
| ENSG00000271620 | 5.13E-15 | -2.63127 | 1 | 1 IGHV3OR16-7      | K06856 |
| ENSG00000271621 | 5.13E-15 | -2.63127 | 1 | 1 RP11-60E8.3      | -      |
| ENSG00000271623 | 5.13E-15 | -2.63127 | 1 | 1 RP11-435I10.5    | -      |
| ENSG00000271624 | 5.13E-15 | -2.63127 | 1 | 1 RP11-651K21.1    | -      |
| ENSG00000271625 | 5.13E-15 | -2.63127 | 1 | 1 PSMA6P4          | K02730 |
| ENSG00000271627 | 5.13E-15 | -2.63127 | 1 | 1 RP11-165D20.1    | -      |
| ENSG00000271629 | 5.13E-15 | -2.63127 | 1 | 1 RP11-79J24.1     | -      |
| ENSG00000271630 | 5.13E-15 | -2.63127 | 1 | 1 IGKV2OR2-8       | -      |
| ENSG00000271632 | 5.13E-15 | -2.63127 | 1 | 1 RP11-496I2.7     | -      |
| ENSG00000271638 | 5.13E-15 | -2.63127 | 1 | 1 CTC-575C13.2     | -      |
| ENSG00000271642 | 5.13E-15 | -2.63127 | 1 | 1 RP11-66E20.2     | -      |
| ENSG00000271644 | 5.13E-15 | -2.63127 | 1 | 1 RP3-365I19.2     | -      |
| ENSG00000271649 | 5.13E-15 | -2.63127 | 1 | 1 LINC00904        | -      |
| ENSG00000271650 | 5.13E-15 | -2.63127 | 1 | 1 AL031601.4       | K12019 |
| ENSG00000271652 | 5.13E-15 | -2.63127 | 1 | 1 RP11-168P6.2     | -      |
| ENSG00000271653 | 5.13E-15 | -2.63127 | 1 | 1 RP11-259K5.1     | -      |
| ENSG00000271654 | 5.13E-15 | -2.63127 | 1 | 1 RP11-685B14.3    | -      |

|                 |          |          |   |                  |        |
|-----------------|----------|----------|---|------------------|--------|
| ENSG00000271655 | 5.13E-15 | -2.63127 | 1 | 1 CTD-2579N5.5   | -      |
| ENSG00000271656 | 5.13E-15 | -2.63127 | 1 | 1 RP11-114N19.5  | K02880 |
| ENSG00000271657 | 5.13E-15 | -2.63127 | 1 | 1 RP11-270B14.1  | K03861 |
| ENSG00000271660 | 5.13E-15 | -2.63127 | 1 | 1 RP1-73A14.2    | -      |
| ENSG00000271661 | 5.13E-15 | -2.63127 | 1 | 1 CTB-87J17.2    | -      |
| ENSG00000271666 | 5.13E-15 | -2.63127 | 1 | 1 CTC-523E23.9   | K09230 |
| ENSG00000271667 | 5.13E-15 | -2.63127 | 1 | 1 RP11-338I24.1  | -      |
| ENSG00000271671 | 5.13E-15 | -2.63127 | 1 | 1 RP11-598F17.2  | -      |
| ENSG00000271672 | 5.13E-15 | -2.63127 | 1 | 1 DUXAP8         | -      |
| ENSG00000271676 | 5.13E-15 | -2.63127 | 1 | 1 RP11-1E1.2     | -      |
| ENSG00000271677 | 5.13E-15 | -2.63127 | 1 | 1 RP1-274L7.3    | K18083 |
| ENSG00000271679 | 5.13E-15 | -2.63127 | 1 | 1 CTB-107P3.1    | -      |
| ENSG00000271680 | 5.13E-15 | -2.63127 | 1 | 1 RP11-564A8.8   | -      |
| ENSG00000271681 | 5.13E-15 | -2.63127 | 1 | 1 RP11-1259L22.2 | K17431 |
| ENSG00000271682 | 5.13E-15 | -2.63127 | 1 | 1 RP11-393B14.2  | -      |
| ENSG00000271686 | 5.13E-15 | -2.63127 | 1 | 1 CTD-2230M5.3   | K15436 |
| ENSG00000271687 | 5.13E-15 | -2.63127 | 1 | 1 MTND5P10       | K03883 |
| ENSG00000271691 | 5.13E-15 | -2.63127 | 1 | 1 RP11-812E19.12 | -      |
| ENSG00000271693 | 5.13E-15 | -2.63127 | 1 | 1 CTD-2194M22.1  | K16795 |
| ENSG00000271696 | 5.13E-15 | -2.63127 | 1 | 1 RP11-548K12.13 | -      |
| ENSG00000271697 | 5.13E-15 | -2.63127 | 1 | 1 RP11-1012A1.10 | K15376 |
| ENSG00000271698 | 5.13E-15 | -2.63127 | 1 | 1 GS1-393G12.13  | K10272 |
| ENSG00000271699 | 5.13E-15 | -2.63127 | 1 | 1 SNX29P2        | K17935 |
| ENSG00000271701 | 5.13E-15 | -2.63127 | 1 | 1 RP11-438F14.10 | -      |
| ENSG00000271702 | 5.13E-15 | -2.63127 | 1 | 1 RP11-63N3.2    | -      |
| ENSG00000271704 | 5.13E-15 | -2.63127 | 1 | 1 CTC-575C13.1   | -      |
| ENSG00000271705 | 5.13E-15 | -2.63127 | 1 | 1 RPL17P3        | K02880 |
| ENSG00000271707 | 5.13E-15 | -2.63127 | 1 | 1 ATP1B3P1       | K01540 |
| ENSG00000271709 | 5.13E-15 | -2.63127 | 1 | 1 RP11-297J22.1  | -      |
| ENSG00000271711 | 5.13E-15 | -2.63127 | 1 | 1 RP11-392O18.2  | K19202 |
| ENSG00000271712 | 5.13E-15 | -2.63127 | 1 | 1 RP11-688D15.2  | -      |
| ENSG00000271714 | 5.13E-15 | -2.63127 | 1 | 1 CTD-2377O17.1  | -      |
| ENSG00000271716 | 5.13E-15 | -2.63127 | 1 | 1 RP11-169K17.4  | -      |
| ENSG00000271717 | 5.13E-15 | -2.63127 | 1 | 1 CTD-3020H12.4  | -      |
| ENSG00000271721 | 5.13E-15 | -2.63127 | 1 | 1 RP11-337C18.9  | -      |
| ENSG00000271722 | 5.13E-15 | -2.63127 | 1 | 1 RP11-446E9.2   | -      |
| ENSG00000271724 | 5.13E-15 | -2.63127 | 1 | 1 CTC-359M8.3    | -      |
| ENSG00000271725 | 5.13E-15 | -2.63127 | 1 | 1 RP11-761I4.4   | -      |
| ENSG00000271734 | 5.13E-15 | -2.63127 | 1 | 1 RP1-111B22.3   | -      |
| ENSG00000271736 | 5.13E-15 | -2.63127 | 1 | 1 RP11-85G21.3   | -      |
| ENSG00000271739 | 5.13E-15 | -2.63127 | 1 | 1 U1             | -      |
| ENSG00000271742 | 5.13E-15 | -2.63127 | 1 | 1 RP4-680D5.9    | -      |
| ENSG00000271743 | 5.13E-15 | -2.63127 | 1 | 1 CTD-2541M15.3  | -      |
| ENSG00000271745 | 5.13E-15 | -2.63127 | 1 | 1 AC093668.3     | -      |
| ENSG00000271746 | 5.13E-15 | -2.63127 | 1 | 1 RP1-202O8.3    | -      |
| ENSG00000271749 | 5.13E-15 | -2.63127 | 1 | 1 RP11-269G24.7  | -      |
| ENSG00000271751 | 5.13E-15 | -2.63127 | 1 | 1 RP11-110I1.14  | -      |
| ENSG00000271752 | 5.13E-15 | -2.63127 | 1 | 1 RP11-269M20.3  | -      |
| ENSG00000271758 | 5.13E-15 | -2.63127 | 1 | 1 RP11-35J10.5   | -      |
| ENSG00000271762 | 5.13E-15 | -2.63127 | 1 | 1 RP11-213H15.4  | -      |
| ENSG00000271763 | 5.13E-15 | -2.63127 | 1 | 1 RP11-386M24.9  | -      |
| ENSG00000271765 | 5.13E-15 | -2.63127 | 1 | 1 7SK            | -      |
| ENSG00000271766 | 5.13E-15 | -2.63127 | 1 | 1 CTD-2195M15.3  | -      |
| ENSG00000271767 | 5.13E-15 | -2.63127 | 1 | 1 AP002789.1     | -      |
| ENSG00000271770 | 5.13E-15 | -2.63127 | 1 | 1 Metazoa_SRP    | -      |
| ENSG00000271771 | 5.13E-15 | -2.63127 | 1 | 1 RP11-1250I15.3 | -      |
| ENSG00000271774 | 5.13E-15 | -2.63127 | 1 | 1 RP4-678D15.1   | -      |
| ENSG00000271776 | 5.13E-15 | -2.63127 | 1 | 1 RP11-52L5.6    | -      |

|                 |          |          |   |                    |        |
|-----------------|----------|----------|---|--------------------|--------|
| ENSG00000271779 | 5.13E-15 | -2.63127 | 1 | 1 RP11-87N3.6      | --     |
| ENSG00000271784 | 5.13E-15 | -2.63127 | 1 | 1 RP1-28H20.3      | --     |
| ENSG00000271786 | 5.13E-15 | -2.63127 | 1 | 1 RP11-139J15.7    | --     |
| ENSG00000271787 | 5.13E-15 | -2.63127 | 1 | 1 RP11-254F7.3     | --     |
| ENSG00000271792 | 5.13E-15 | -2.63127 | 1 | 1 CTB-35F21.5      | --     |
| ENSG00000271793 | 5.13E-15 | -2.63127 | 1 | 1 RP11-321N4.5     | K17926 |
| ENSG00000271794 | 5.13E-15 | -2.63127 | 1 | 1 snoU13           | --     |
| ENSG00000271796 | 5.13E-15 | -2.63127 | 1 | 1 snoU13           | --     |
| ENSG00000271810 | 5.13E-15 | -2.63127 | 1 | 1 RP11-426L16.10   | K17504 |
| ENSG00000271811 | 5.13E-15 | -2.63127 | 1 | 1 RP1-79C4.4       | --     |
| ENSG00000271814 | 5.13E-15 | -2.63127 | 1 | 1 7SK              | --     |
| ENSG00000271817 | 5.13E-15 | -2.63127 | 1 | 1 U3               | --     |
| ENSG00000271818 | 5.13E-15 | -2.63127 | 1 | 1 7SK              | --     |
| ENSG00000271820 | 5.13E-15 | -2.63127 | 1 | 1 RP5-894D12.5     | --     |
| ENSG00000271821 | 5.13E-15 | -2.63127 | 1 | 1 XXbac-BPG299F13. | --     |
| ENSG00000271824 | 5.13E-15 | -2.63127 | 1 | 1 AC009014.3       | --     |
| ENSG00000271830 | 5.13E-15 | -2.63127 | 1 | 1 RP11-1C8.7       | --     |
| ENSG00000271831 | 5.13E-15 | -2.63127 | 1 | 1 AL022345.9       | --     |
| ENSG00000271841 | 5.13E-15 | -2.63127 | 1 | 1 U7               | --     |
| ENSG00000271842 | 5.13E-15 | -2.63127 | 1 | 1 snoU13           | --     |
| ENSG00000271845 | 5.13E-15 | -2.63127 | 1 | 1 RP4-790G17.7     | --     |
| ENSG00000271846 | 5.13E-15 | -2.63127 | 1 | 1 CTD-3113P16.9    | --     |
| ENSG00000271848 | 5.13E-15 | -2.63127 | 1 | 1 RP11-464F9.21    | --     |
| ENSG00000271850 | 5.13E-15 | -2.63127 | 1 | 1 RP11-16D22.2     | --     |
| ENSG00000271852 | 5.13E-15 | -2.63127 | 1 | 1 SNORD11B         | --     |
| ENSG00000271853 | 5.13E-15 | -2.63127 | 1 | 1 RP1-178F15.5     | --     |
| ENSG00000271856 | 5.13E-15 | -2.63127 | 1 | 1 RP11-861A13.4    | --     |
| ENSG00000271860 | 5.13E-15 | -2.63127 | 1 | 1 RP11-436D23.1    | --     |
| ENSG00000271874 | 5.13E-15 | -2.63127 | 1 | 1 CTD-2024P10.2    | --     |
| ENSG00000271875 | 5.13E-15 | -2.63127 | 1 | 1 RP11-430N14.4    | --     |
| ENSG00000271876 | 5.13E-15 | -2.63127 | 1 | 1 AC073508.1       | --     |
| ENSG00000271885 | 5.13E-15 | -2.63127 | 1 | 1 SRSF8            | K12891 |
| ENSG00000271886 | 5.13E-15 | -2.63127 | 1 | 1 MIR98            | --     |
| ENSG00000271890 | 5.13E-15 | -2.63127 | 1 | 1 OR10AE1P         | --     |
| ENSG00000271894 | 5.13E-15 | -2.63127 | 1 | 1 RP11-482H16.1    | --     |
| ENSG00000271897 | 5.13E-15 | -2.63127 | 1 | 1 RP11-679B17.2    | --     |
| ENSG00000271898 | 5.13E-15 | -2.63127 | 1 | 1 MIR4791          | --     |
| ENSG00000271899 | 5.13E-15 | -2.63127 | 1 | 1 MIR4466          | --     |
| ENSG00000271900 | 5.13E-15 | -2.63127 | 1 | 1 RP11-1113L8.7    | --     |
| ENSG00000271901 | 5.13E-15 | -2.63127 | 1 | 1 RP11-266E6.3     | --     |
| ENSG00000271904 | 5.13E-15 | -2.63127 | 1 | 1 CTC-498M16.4     | --     |
| ENSG00000271905 | 5.13E-15 | -2.63127 | 1 | 1 AC137590.1       | --     |
| ENSG00000271907 | 5.13E-15 | -2.63127 | 1 | 1 SNORA35          | --     |
| ENSG00000271911 | 5.13E-15 | -2.63127 | 1 | 1 RP11-532F6.5     | --     |
| ENSG00000271916 | 5.13E-15 | -2.63127 | 1 | 1 RP11-884K10.6    | --     |
| ENSG00000271917 | 5.13E-15 | -2.63127 | 1 | 1 RP11-506O24.2    | --     |
| ENSG00000271919 | 5.13E-15 | -2.63127 | 1 | 1 RP11-269G24.8    | --     |
| ENSG00000271922 | 5.13E-15 | -2.63127 | 1 | 1 snoU13           | --     |
| ENSG00000271923 | 5.13E-15 | -2.63127 | 1 | 1 U6               | --     |
| ENSG00000271931 | 5.13E-15 | -2.63127 | 1 | 1 RP11-63L7.5      | --     |
| ENSG00000271932 | 5.13E-15 | -2.63127 | 1 | 1 U6               | --     |
| ENSG00000271934 | 5.13E-15 | -2.63127 | 1 | 1 OR2AS2P          | --     |
| ENSG00000271938 | 5.13E-15 | -2.63127 | 1 | 1 RP11-589C21.6    | --     |
| ENSG00000271941 | 5.13E-15 | -2.63127 | 1 | 1 RP11-188P20.3    | --     |
| ENSG00000271943 | 5.13E-15 | -2.63127 | 1 | 1 RP11-222K16.1    | --     |
| ENSG00000271945 | 5.13E-15 | -2.63127 | 1 | 1 RP11-354K4.2     | --     |
| ENSG00000271946 | 5.13E-15 | -2.63127 | 1 | 1 MIR376C          | --     |
| ENSG00000271947 | 5.13E-15 | -2.63127 | 1 | 1 RP11-439M11.1    | --     |

|                 |          |          |   |                  |        |
|-----------------|----------|----------|---|------------------|--------|
| ENSG00000271949 | 5.13E-15 | -2.63127 | 1 | 1 RP11-302M6.4   | --     |
| ENSG00000271952 | 5.13E-15 | -2.63127 | 1 | 1 RP11-245G13.2  | --     |
| ENSG00000271955 | 5.13E-15 | -2.63127 | 1 | 1 RP11-444A22.1  | --     |
| ENSG00000271956 | 5.13E-15 | -2.63127 | 1 | 1 DLX6-AS2       | --     |
| ENSG00000271958 | 5.13E-15 | -2.63127 | 1 | 1 RP11-617D20.2  | --     |
| ENSG00000271959 | 5.13E-15 | -2.63127 | 1 | 1 CTD-3064M3.7   | --     |
| ENSG00000271969 | 5.13E-15 | -2.63127 | 1 | 1 U47924.29      | --     |
| ENSG00000271974 | 5.13E-15 | -2.63127 | 1 | 1 RP11-927P21.12 | K10874 |
| ENSG00000271981 | 5.13E-15 | -2.63127 | 1 | 1 RP11-573G6.8   | --     |
| ENSG00000271982 | 5.13E-15 | -2.63127 | 1 | 1 SNORD58B       | --     |
| ENSG00000271985 | 5.13E-15 | -2.63127 | 1 | 1 RP11-589B3.7   | K01896 |
| ENSG00000271986 | 5.13E-15 | -2.63127 | 1 | 1 Metazoa_SRP    | --     |
| ENSG00000271989 | 5.13E-15 | -2.63127 | 1 | 1 RP4-736L20.3   | --     |
| ENSG00000271995 | 5.13E-15 | -2.63127 | 1 | 1 AC034154.1     | --     |
| ENSG00000271998 | 5.13E-15 | -2.63127 | 1 | 1 CTD-2199O4.7   | --     |
| ENSG00000272002 | 5.13E-15 | -2.63127 | 1 | 1 RP11-557L19.1  | --     |
| ENSG00000272005 | 5.13E-15 | -2.63127 | 1 | 1 RP11-91J19.4   | --     |
| ENSG00000272015 | 5.13E-15 | -2.63127 | 1 | 1 SNORA62        | --     |
| ENSG00000272019 | 5.13E-15 | -2.63127 | 1 | 1 Metazoa_SRP    | --     |
| ENSG00000272020 | 5.13E-15 | -2.63127 | 1 | 1 U1             | --     |
| ENSG00000272021 | 5.13E-15 | -2.63127 | 1 | 1 AC008592.8     | --     |
| ENSG00000272023 | 5.13E-15 | -2.63127 | 1 | 1 CTC-350I8.1    | --     |
| ENSG00000272025 | 5.13E-15 | -2.63127 | 1 | 1 SNORA74        | --     |
| ENSG00000272027 | 5.13E-15 | -2.63127 | 1 | 1 RP11-529E15.1  | --     |
| ENSG00000272028 | 5.13E-15 | -2.63127 | 1 | 1 U6             | --     |
| ENSG00000272029 | 5.13E-15 | -2.63127 | 1 | 1 RP3-511B24.6   | --     |
| ENSG00000272033 | 5.13E-15 | -2.63127 | 1 | 1 RP11-52A20.2   | --     |
| ENSG00000272036 | 5.13E-15 | -2.63127 | 1 | 1 MIR139         | --     |
| ENSG00000272042 | 5.13E-15 | -2.63127 | 1 | 1 Metazoa_SRP    | --     |
| ENSG00000272045 | 5.13E-15 | -2.63127 | 1 | 1 MIR1914        | --     |
| ENSG00000272049 | 5.13E-15 | -2.63127 | 1 | 1 RP11-480D4.6   | --     |
| ENSG00000272050 | 5.13E-15 | -2.63127 | 1 | 1 RP13-379O24.3  | --     |
| ENSG00000272051 | 5.13E-15 | -2.63127 | 1 | 1 Y_RNA          | --     |
| ENSG00000272066 | 5.13E-15 | -2.63127 | 1 | 1 RP3-326L13.2   | --     |
| ENSG00000272075 | 5.13E-15 | -2.63127 | 1 | 1 Metazoa_SRP    | --     |
| ENSG00000272076 | 5.13E-15 | -2.63127 | 1 | 1 RP11-11C20.3   | --     |
| ENSG00000272080 | 5.13E-15 | -2.63127 | 1 | 1 MIR502         | --     |
| ENSG00000272082 | 5.13E-15 | -2.63127 | 1 | 1 AC093628.1     | --     |
| ENSG00000272085 | 5.13E-15 | -2.63127 | 1 | 1 RP11-542A14.2  | --     |
| ENSG00000272094 | 5.13E-15 | -2.63127 | 1 | 1 RP4-665J23.4   | --     |
| ENSG00000272096 | 5.13E-15 | -2.63127 | 1 | 1 Metazoa_SRP    | --     |
| ENSG00000272098 | 5.13E-15 | -2.63127 | 1 | 1 AC092299.8     | --     |
| ENSG00000272103 | 5.13E-15 | -2.63127 | 1 | 1 CTD-2653M23.3  | --     |
| ENSG00000272104 | 5.13E-15 | -2.63127 | 1 | 1 XXcos-LUCA11.5 | K08371 |
| ENSG00000272108 | 5.13E-15 | -2.63127 | 1 | 1 AC005754.8     | --     |
| ENSG00000272113 | 5.13E-15 | -2.63127 | 1 | 1 Y_RNA          | --     |
| ENSG00000272114 | 5.13E-15 | -2.63127 | 1 | 1 RP1-261G23.7   | --     |
| ENSG00000272115 | 5.13E-15 | -2.63127 | 1 | 1 GS1-393G12.14  | --     |
| ENSG00000272121 | 5.13E-15 | -2.63127 | 1 | 1 RP4-555D20.4   | --     |
| ENSG00000272127 | 5.13E-15 | -2.63127 | 1 | 1 RP11-129K12.3  | --     |
| ENSG00000272134 | 5.13E-15 | -2.63127 | 1 | 1 RP11-927P21.8  | --     |
| ENSG00000272135 | 5.13E-15 | -2.63127 | 1 | 1 RP11-107C16.2  | --     |
| ENSG00000272137 | 5.13E-15 | -2.63127 | 1 | 1 RP11-177G23.2  | --     |
| ENSG00000272139 | 5.13E-15 | -2.63127 | 1 | 1 CTD-2544H17.2  | --     |
| ENSG00000272141 | 5.13E-15 | -2.63127 | 1 | 1 RP11-465B22.8  | --     |
| ENSG00000272143 | 5.13E-15 | -2.63127 | 1 | 1 FGF14-AS2      | --     |
| ENSG00000272149 | 5.13E-15 | -2.63127 | 1 | 1 RP11-627J17.1  | --     |
| ENSG00000272154 | 5.13E-15 | -2.63127 | 1 | 1 AC005754.7     | --     |

|                 |          |          |   |                    |        |
|-----------------|----------|----------|---|--------------------|--------|
| ENSG00000272157 | 5.13E-15 | -2.63127 | 1 | 1 CTD-2168K21.2    | --     |
| ENSG00000272158 | 5.13E-15 | -2.63127 | 1 | 1 RP11-840I19.5    | --     |
| ENSG00000272159 | 5.13E-15 | -2.63127 | 1 | 1 RP11-350N15.6    | --     |
| ENSG00000272160 | 5.13E-15 | -2.63127 | 1 | 1 U4               | --     |
| ENSG00000272162 | 5.13E-15 | -2.63127 | 1 | 1 RP11-637O19.3    | --     |
| ENSG00000272163 | 5.13E-15 | -2.63127 | 1 | 1 GS1-72M22.1      | --     |
| ENSG00000272164 | 5.13E-15 | -2.63127 | 1 | 1 RP11-180P8.5     | --     |
| ENSG00000272166 | 5.13E-15 | -2.63127 | 1 | 1 SNORD5           | --     |
| ENSG00000272167 | 5.13E-15 | -2.63127 | 1 | 1 RP11-53A1.2      | --     |
| ENSG00000272173 | 5.13E-15 | -2.63127 | 1 | 1 U47924.31        | --     |
| ENSG00000272174 | 5.13E-15 | -2.63127 | 1 | 1 AC026703.2       | --     |
| ENSG00000272175 | 5.13E-15 | -2.63127 | 1 | 1 RP4-657D16.6     | --     |
| ENSG00000272177 | 5.13E-15 | -2.63127 | 1 | 1 RP11-340F16.1    | --     |
| ENSG00000272179 | 5.13E-15 | -2.63127 | 1 | 1 snoU13           | --     |
| ENSG00000272180 | 5.13E-15 | -2.63127 | 1 | 1 RP11-481J13.1    | --     |
| ENSG00000272186 | 5.13E-15 | -2.63127 | 1 | 1 RP11-110I1.13    | --     |
| ENSG00000272191 | 5.13E-15 | -2.63127 | 1 | 1 RP11-445F12.2    | --     |
| ENSG00000272197 | 5.13E-15 | -2.63127 | 1 | 1 Metazoa_SRP      | --     |
| ENSG00000272203 | 5.13E-15 | -2.63127 | 1 | 1 AC004775.5       | --     |
| ENSG00000272209 | 5.13E-15 | -2.63127 | 1 | 1 RP3-500L14.2     | --     |
| ENSG00000272213 | 5.13E-15 | -2.63127 | 1 | 1 MIR484           | --     |
| ENSG00000272214 | 5.13E-15 | -2.63127 | 1 | 1 AC079602.1       | K17985 |
| ENSG00000272215 | 5.13E-15 | -2.63127 | 1 | 1 U7               | --     |
| ENSG00000272217 | 5.13E-15 | -2.63127 | 1 | 1 XXbac-BPG157A10  | --     |
| ENSG00000272218 | 5.13E-15 | -2.63127 | 1 | 1 RP11-11N5.3      | --     |
| ENSG00000272219 | 5.13E-15 | -2.63127 | 1 | 1 CTB-181H17.1     | --     |
| ENSG00000272220 | 5.13E-15 | -2.63127 | 1 | 1 RP11-927P21.9    | --     |
| ENSG00000272221 | 5.13E-15 | -2.63127 | 1 | 1 XXbac-BPG181B23. | --     |
| ENSG00000272225 | 5.13E-15 | -2.63127 | 1 | 1 RP11-592B15.9    | --     |
| ENSG00000272230 | 5.13E-15 | -2.63127 | 1 | 1 MIR3666          | --     |
| ENSG00000272231 | 5.13E-15 | -2.63127 | 1 | 1 AC136188.1       | --     |
| ENSG00000272232 | 5.13E-15 | -2.63127 | 1 | 1 Metazoa_SRP      | --     |
| ENSG00000272233 | 5.13E-15 | -2.63127 | 1 | 1 RP11-503E24.3    | --     |
| ENSG00000272234 | 5.13E-15 | -2.63127 | 1 | 1 CTD-2325A15.5    | --     |
| ENSG00000272235 | 5.13E-15 | -2.63127 | 1 | 1 RP11-22L13.1     | --     |
| ENSG00000272236 | 5.13E-15 | -2.63127 | 1 | 1 XXbac-BPG170G13  | --     |
| ENSG00000272237 | 5.13E-15 | -2.63127 | 1 | 1 SNORA25          | --     |
| ENSG00000272239 | 5.13E-15 | -2.63127 | 1 | 1 CTB-108O6.2      | --     |
| ENSG00000272241 | 5.13E-15 | -2.63127 | 1 | 1 AL160275.1       | --     |
| ENSG00000272243 | 5.13E-15 | -2.63127 | 1 | 1 RP11-554D15.3    | --     |
| ENSG00000272244 | 5.13E-15 | -2.63127 | 1 | 1 Metazoa_SRP      | --     |
| ENSG00000272247 | 5.13E-15 | -2.63127 | 1 | 1 RP11-379F4.9     | --     |
| ENSG00000272249 | 5.13E-15 | -2.63127 | 1 | 1 KB-1958F4.2      | --     |
| ENSG00000272250 | 5.13E-15 | -2.63127 | 1 | 1 RP11-346C20.4    | --     |
| ENSG00000272253 | 5.13E-15 | -2.63127 | 1 | 1 5S_rRNA          | --     |
| ENSG00000272255 | 5.13E-15 | -2.63127 | 1 | 1 CTD-3224K15.3    | --     |
| ENSG00000272259 | 5.13E-15 | -2.63127 | 1 | 1 RP11-305P22.9    | --     |
| ENSG00000272262 | 5.13E-15 | -2.63127 | 1 | 1 U6               | --     |
| ENSG00000272268 | 5.13E-15 | -2.63127 | 1 | 1 DKFZP761K2322    | K12581 |
| ENSG00000272272 | 5.13E-15 | -2.63127 | 1 | 1 snoU13           | --     |
| ENSG00000272273 | 5.13E-15 | -2.63127 | 1 | 1 XXbac-BPG252P9.1 | --     |
| ENSG00000272278 | 5.13E-15 | -2.63127 | 1 | 1 AL121932.1       | --     |
| ENSG00000272282 | 5.13E-15 | -2.63127 | 1 | 1 RP11-222K16.2    | --     |
| ENSG00000272286 | 5.13E-15 | -2.63127 | 1 | 1 Z83307.3         | --     |
| ENSG00000272291 | 5.13E-15 | -2.63127 | 1 | 1 MIR665           | --     |
| ENSG00000272292 | 5.13E-15 | -2.63127 | 1 | 1 U6               | --     |
| ENSG00000272293 | 5.13E-15 | -2.63127 | 1 | 1 RP11-91J19.3     | --     |
| ENSG00000272294 | 5.13E-15 | -2.63127 | 1 | 1 RP3-326L13.3     | --     |

|                 |          |          |   |                  |        |
|-----------------|----------|----------|---|------------------|--------|
| ENSG00000272296 | 5.13E-15 | -2.63127 | 1 | 1 SNORD96A       | —      |
| ENSG00000272297 | 5.13E-15 | -2.63127 | 1 | 1 RP11-215A19.2  | K04285 |
| ENSG00000272298 | 5.13E-15 | -2.63127 | 1 | 1 RP11-386M24.8  | —      |
| ENSG00000272299 | 5.13E-15 | -2.63127 | 1 | 1 RP11-394A14.4  | —      |
| ENSG00000272302 | 5.13E-15 | -2.63127 | 1 | 1 BX004987.1     | —      |
| ENSG00000272304 | 5.13E-15 | -2.63127 | 1 | 1 RP11-19C24.1   | —      |
| ENSG00000272310 | 5.13E-15 | -2.63127 | 1 | 1 snoU13         | —      |
| ENSG00000272311 | 5.13E-15 | -2.63127 | 1 | 1 IFNL4P1        | —      |
| ENSG00000272317 | 5.13E-15 | -2.63127 | 1 | 1 AL162424.2     | —      |
| ENSG00000272319 | 5.13E-15 | -2.63127 | 1 | 1 AL022345.7     | —      |
| ENSG00000272320 | 5.13E-15 | -2.63127 | 1 | 1 RP11-506K6.4   | —      |
| ENSG00000272321 | 5.13E-15 | -2.63127 | 1 | 1 KB-1517D11.4   | —      |
| ENSG00000272323 | 5.13E-15 | -2.63127 | 1 | 1 CTD-2517O10.6  | —      |
| ENSG00000272327 | 5.13E-15 | -2.63127 | 1 | 1 RP11-1002K11.1 | —      |
| ENSG00000272328 | 5.13E-15 | -2.63127 | 1 | 1 RP4-594A5.1    | —      |
| ENSG00000272329 | 5.13E-15 | -2.63127 | 1 | 1 RP11-65L19.4   | —      |
| ENSG00000272330 | 5.13E-15 | -2.63127 | 1 | 1 AC002044.4     | —      |
| ENSG00000272337 | 5.13E-15 | -2.63127 | 1 | 1 U6             | —      |
| ENSG00000272342 | 5.13E-15 | -2.63127 | 1 | 1 RP13-539J13.1  | —      |
| ENSG00000272344 | 5.13E-15 | -2.63127 | 1 | 1 SNORD114-21    | —      |
| ENSG00000272346 | 5.13E-15 | -2.63127 | 1 | 1 RP11-927P21.11 | —      |
| ENSG00000272347 | 5.13E-15 | -2.63127 | 1 | 1 RP11-43F13.4   | —      |
| ENSG00000272349 | 5.13E-15 | -2.63127 | 1 | 1 RP11-397O8.7   | —      |
| ENSG00000272351 | 5.13E-15 | -2.63127 | 1 | 1 5S_rRNA        | —      |
| ENSG00000272362 | 5.13E-15 | -2.63127 | 1 | 1 RP4-781K5.9    | —      |
| ENSG00000272371 | 5.13E-15 | -2.63127 | 1 | 1 RP11-25O10.2   | —      |
| ENSG00000272372 | 5.13E-15 | -2.63127 | 1 | 1 RP11-441F2.5   | —      |
| ENSG00000272380 | 5.13E-15 | -2.63127 | 1 | 1 MIR3976        | —      |
| ENSG00000272383 | 5.13E-15 | -2.63127 | 1 | 1 RP11-556O9.4   | —      |
| ENSG00000272384 | 5.13E-15 | -2.63127 | 1 | 1 RP11-44N11.2   | —      |
| ENSG00000272385 | 5.13E-15 | -2.63127 | 1 | 1 AC007682.3     | —      |
| ENSG00000272387 | 5.13E-15 | -2.63127 | 1 | 1 AL022345.8     | —      |
| ENSG00000272393 | 5.13E-15 | -2.63127 | 1 | 1 U6             | —      |
| ENSG00000272395 | 5.13E-15 | -2.63127 | 1 | 1 IFNL4          | —      |
| ENSG00000272396 | 5.13E-15 | -2.63127 | 1 | 1 CTC-490G23.4   | —      |
| ENSG00000272397 | 5.13E-15 | -2.63127 | 1 | 1 RP11-497D6.5   | —      |
| ENSG00000272400 | 5.13E-15 | -2.63127 | 1 | 1 RP11-927P21.7  | —      |
| ENSG00000272406 | 5.13E-15 | -2.63127 | 1 | 1 RP11-185E12.2  | —      |
| ENSG00000272407 | 5.13E-15 | -2.63127 | 1 | 1 RP3-511B24.5   | K02893 |
| ENSG00000272410 | 5.13E-15 | -2.63127 | 1 | 1 RP11-438J1.1   | K03424 |
| ENSG00000272411 | 5.13E-15 | -2.63127 | 1 | 1 RP11-44B19.1   | —      |
| ENSG00000272412 | 5.13E-15 | -2.63127 | 1 | 1 Metazoa_SRP    | —      |
| ENSG00000272414 | 5.13E-15 | -2.63127 | 1 | 1 FAM47E-STBD1   | —      |
| ENSG00000272418 | 5.13E-15 | -2.63127 | 1 | 1 RP11-762H8.4   | —      |
| ENSG00000272425 | 5.13E-15 | -2.63127 | 1 | 1 RP11-363E6.4   | —      |
| ENSG00000272431 | 5.13E-15 | -2.63127 | 1 | 1 RP11-281O15.8  | —      |
| ENSG00000272435 | 5.13E-15 | -2.63127 | 1 | 1 5S_rRNA        | —      |
| ENSG00000272436 | 5.13E-15 | -2.63127 | 1 | 1 CUX2P1         | —      |
| ENSG00000272440 | 5.13E-15 | -2.63127 | 1 | 1 RP11-379F4.6   | —      |
| ENSG00000272443 | 5.13E-15 | -2.63127 | 1 | 1 OR13Z2P        | K04257 |
| ENSG00000272445 | 5.13E-15 | -2.63127 | 1 | 1 U6             | —      |
| ENSG00000272446 | 5.13E-15 | -2.63127 | 1 | 1 RP1-225E12.3   | —      |
| ENSG00000272448 | 5.13E-15 | -2.63127 | 1 | 1 LLNLR-299G3.1  | —      |
| ENSG00000272456 | 5.13E-15 | -2.63127 | 1 | 1 CTD-2342N23.3  | —      |
| ENSG00000272458 | 5.13E-15 | -2.63127 | 1 | 1 MIR432         | —      |
| ENSG00000272460 | 5.13E-15 | -2.63127 | 1 | 1 SNORD115-40    | —      |
| ENSG00000272461 | 5.13E-15 | -2.63127 | 1 | 1 RP11-689C9.1   | —      |
| ENSG00000272463 | 5.13E-15 | -2.63127 | 1 | 1 RP11-532F6.3   | —      |

|                 |          |          |   |                    |        |
|-----------------|----------|----------|---|--------------------|--------|
| ENSG00000272464 | 5.13E-15 | -2.63127 | 1 | 1 snoU13           | --     |
| ENSG00000272469 | 5.13E-15 | -2.63127 | 1 | 1 Metazoa_SRP      | --     |
| ENSG00000272474 | 5.13E-15 | -2.63127 | 1 | 1 SNORD113-5       | --     |
| ENSG00000272475 | 5.13E-15 | -2.63127 | 1 | 1 RP11-342M3.2     | K01896 |
| ENSG00000272477 | 5.13E-15 | -2.63127 | 1 | 1 RP11-158G18.1    | --     |
| ENSG00000272478 | 5.13E-15 | -2.63127 | 1 | 1 RP1-317E23.7     | --     |
| ENSG00000272479 | 5.13E-15 | -2.63127 | 1 | 1 RP11-301G7.1     | --     |
| ENSG00000272480 | 5.13E-15 | -2.63127 | 1 | 1 OR13Z3P          | --     |
| ENSG00000272483 | 5.13E-15 | -2.63127 | 1 | 1 RP11-169K17.3    | --     |
| ENSG00000272485 | 5.13E-15 | -2.63127 | 1 | 1 RP11-284J1.1     | --     |
| ENSG00000272489 | 5.13E-15 | -2.63127 | 1 | 1 RP11-182L21.5    | --     |
| ENSG00000272491 | 5.13E-15 | -2.63127 | 1 | 1 RP5-1024N4.4     | --     |
| ENSG00000272494 | 5.13E-15 | -2.63127 | 1 | 1 OR1X1P           | K04257 |
| ENSG00000272501 | 5.13E-15 | -2.63127 | 1 | 1 XXbac-BPG299F13. | --     |
| ENSG00000272505 | 5.13E-15 | -2.63127 | 1 | 1 RP11-981G7.6     | --     |
| ENSG00000272510 | 5.13E-15 | -2.63127 | 1 | 1 RP4-680D5.8      | --     |
| ENSG00000272511 | 5.13E-15 | -2.63127 | 1 | 1 RP11-180N14.1    | --     |
| ENSG00000272514 | 5.13E-15 | -2.63127 | 1 | 1 C6ORF165         | --     |
| ENSG00000272515 | 5.13E-15 | -2.63127 | 1 | 1 RP11-29P20.1     | --     |
| ENSG00000272519 | 5.13E-15 | -2.63127 | 1 | 1 RP11-105N14.2    | --     |
| ENSG00000272521 | 5.13E-15 | -2.63127 | 1 | 1 RP1-63M2.6       | --     |
| ENSG00000272536 | 5.13E-15 | -2.63127 | 1 | 1 Metazoa_SRP      | --     |
| ENSG00000272537 | 5.13E-15 | -2.63127 | 1 | 1 GS1-166A23.1     | --     |
| ENSG00000272540 | 5.13E-15 | -2.63127 | 1 | 1 XXbac-BPG252P9.9 | --     |
| ENSG00000272541 | 5.13E-15 | -2.63127 | 1 | 1 XXbac-BPGBPG55C  | --     |
| ENSG00000272542 | 5.13E-15 | -2.63127 | 1 | 1 RP11-255P5.2     | --     |
| ENSG00000272543 | 5.13E-15 | -2.63127 | 1 | 1 MIR4787          | --     |
| ENSG00000272545 | 5.13E-15 | -2.63127 | 1 | 1 CTC-527H23.4     | --     |
| ENSG00000272546 | 5.13E-15 | -2.63127 | 1 | 1 OR3A5P           | K04257 |
| ENSG00000272549 | 5.13E-15 | -2.63127 | 1 | 1 RP11-351J23.2    | --     |
| ENSG00000272551 | 5.13E-15 | -2.63127 | 1 | 1 RP11-324L17.1    | --     |
| ENSG00000272554 | 5.13E-15 | -2.63127 | 1 | 1 RP11-317L10.1    | --     |
| ENSG00000272555 | 5.13E-15 | -2.63127 | 1 | 1 RP11-459I19.1    | --     |
| ENSG00000272558 | 5.13E-15 | -2.63127 | 1 | 1 U91328.21        | --     |
| ENSG00000272559 | 5.13E-15 | -2.63127 | 1 | 1 OR51F3P          | K04257 |
| ENSG00000272563 | 5.13E-15 | -2.63127 | 1 | 1 RP11-480C16.1    | --     |
| ENSG00000272564 | 5.13E-15 | -2.63127 | 1 | 1 RP11-548P2.2     | --     |
| ENSG00000272566 | 5.13E-15 | -2.63127 | 1 | 1 RP11-462G22.2    | --     |
| ENSG00000272568 | 5.13E-15 | -2.63127 | 1 | 1 CTB-113D17.1     | --     |
| ENSG00000272569 | 5.13E-15 | -2.63127 | 1 | 1 OR5BL1P          | --     |
| ENSG00000272575 | 5.13E-15 | -2.63127 | 1 | 1 RP11-702B10.1    | --     |
| ENSG00000272583 | 5.13E-15 | -2.63127 | 1 | 1 RP11-344P13.6    | --     |
| ENSG00000272592 | 5.13E-15 | -2.63127 | 1 | 1 RP11-63A2.2      | --     |
| ENSG00000272595 | 5.13E-15 | -2.63127 | 1 | 1 OR10AH1P         | K04257 |
| ENSG00000272600 | 5.13E-15 | -2.63127 | 1 | 1 AC007308.7       | --     |
| ENSG00000272601 | 5.13E-15 | -2.63127 | 1 | 1 RP11-155G14.5    | --     |
| ENSG00000272617 | 5.13E-15 | -2.63127 | 1 | 1 RP11-343C2.12    | K01462 |
| ENSG00000272619 | 5.13E-15 | -2.63127 | 1 | 1 RP11-563K23.1    | --     |
| ENSG00000272625 | 5.13E-15 | -2.63127 | 1 | 1 RP11-737O24.5    | --     |
| ENSG00000272626 | 5.13E-15 | -2.63127 | 1 | 1 RP11-468N14.13   | --     |
| ENSG00000272628 | 5.13E-15 | -2.63127 | 1 | 1 REXO1L3P         | K14570 |
| ENSG00000272632 | 5.13E-15 | -2.63127 | 1 | 1 RP11-362F19.3    | --     |
| ENSG00000272634 | 5.13E-15 | -2.63127 | 1 | 1 OR51F5P          | K04257 |
| ENSG00000272635 | 5.13E-15 | -2.63127 | 1 | 1 LLNLF-65H9.1     | --     |
| ENSG00000272636 | 5.13E-15 | -2.63127 | 1 | 1 DOC2B            | --     |
| ENSG00000272638 | 5.13E-15 | -2.63127 | 1 | 1 GS1-114I9.1      | --     |
| ENSG00000272639 | 5.13E-15 | -2.63127 | 1 | 1 RP11-66B24.8     | --     |
| ENSG00000272642 | 5.13E-15 | -2.63127 | 1 | 1 CTD-2234N14.1    | --     |



|                 |          |          |   |                  |        |
|-----------------|----------|----------|---|------------------|--------|
| ENSG00000272646 | 5.13E-15 | -2.63127 | 1 | 1 RP11-188P17.2  | --     |
| ENSG00000272657 | 5.13E-15 | -2.63127 | 1 | 1 AP000320.7     | --     |
| ENSG00000272660 | 5.13E-15 | -2.63127 | 1 | 1 RP11-145M9.6   | --     |
| ENSG00000272661 | 5.13E-15 | -2.63127 | 1 | 1 RP4-548D19.3   | --     |
| ENSG00000272664 | 5.13E-15 | -2.63127 | 1 | 1 OR51C4P        | K04257 |
| ENSG00000272672 | 5.13E-15 | -2.63127 | 1 | 1 RP11-302M6.5   | --     |
| ENSG00000272675 | 5.13E-15 | -2.63127 | 1 | 1 AC004019.18    | --     |
| ENSG00000272676 | 5.13E-15 | -2.63127 | 1 | 1 OR5AO1P        | --     |
| ENSG00000272678 | 5.13E-15 | -2.63127 | 1 | 1 RP11-797D24.4  | --     |
| ENSG00000272679 | 5.13E-15 | -2.63127 | 1 | 1 RP11-216L13.18 | --     |
| ENSG00000272685 | 5.13E-15 | -2.63127 | 1 | 1 OR9I3P         | K04257 |
| ENSG00000272688 | 5.13E-15 | -2.63127 | 1 | 1 RP13-270P17.3  | --     |
| ENSG00000272689 | 5.13E-15 | -2.63127 | 1 | 1 RP4-539M6.21   | --     |
| ENSG00000272690 | 5.13E-15 | -2.63127 | 1 | 1 RP11-803B1.8   | --     |
| ENSG00000272694 | 5.13E-15 | -2.63127 | 1 | 1 RP1-63G5.8     | --     |
| ENSG00000272699 | 5.13E-15 | -2.63127 | 1 | 1 RP11-145M9.5   | --     |
| ENSG00000272700 | 5.13E-15 | -2.63127 | 1 | 1 RP11-245C23.3  | --     |
| ENSG00000272701 | 5.13E-15 | -2.63127 | 1 | 1 RP11-2E11.10   | --     |
| ENSG00000272709 | 5.13E-15 | -2.63127 | 1 | 1 RP11-458D21.6  | --     |
| ENSG00000272710 | 5.13E-15 | -2.63127 | 1 | 1 CTD-2026G6.3   | --     |
| ENSG00000272714 | 5.13E-15 | -2.63127 | 1 | 1 RP1-276J11.3   | --     |
| ENSG00000272719 | 5.13E-15 | -2.63127 | 1 | 1 CTB-161C1.1    | --     |
| ENSG00000272724 | 5.13E-15 | -2.63127 | 1 | 1 RP1-288H2.4    | --     |
| ENSG00000272727 | 5.13E-15 | -2.63127 | 1 | 1 RP11-142A22.4  | --     |
| ENSG00000272729 | 5.13E-15 | -2.63127 | 1 | 1 RP11-387A1.5   | --     |
| ENSG00000272733 | 5.13E-15 | -2.63127 | 1 | 1 KB-208E9.1     | --     |
| ENSG00000272741 | 5.13E-15 | -2.63127 | 1 | 1 RP11-447L10.1  | K00968 |
| ENSG00000272742 | 5.13E-15 | -2.63127 | 1 | 1 CTB-43P18.1    | --     |
| ENSG00000272746 | 5.13E-15 | -2.63127 | 1 | 1 RP11-53B2.6    | --     |
| ENSG00000272748 | 5.13E-15 | -2.63127 | 1 | 1 RP11-222G7.2   | --     |
| ENSG00000272754 | 5.13E-15 | -2.63127 | 1 | 1 AL133245.2     | --     |
| ENSG00000272762 | 5.13E-15 | -2.63127 | 1 | 1 RP11-155D18.14 | K13162 |
| ENSG00000272763 | 5.13E-15 | -2.63127 | 1 | 1 RP11-357H14.17 | --     |
| ENSG00000272770 | 5.13E-15 | -2.63127 | 1 | 1 RP11-74E22.5   | --     |
| ENSG00000272774 | 5.13E-15 | -2.63127 | 1 | 1 RP11-433A10.3  | --     |
| ENSG00000272780 | 5.13E-15 | -2.63127 | 1 | 1 RP11-822E23.8  | --     |
| ENSG00000272781 | 5.13E-15 | -2.63127 | 1 | 1 MDGA2          | --     |
| ENSG00000272783 | 5.13E-15 | -2.63127 | 1 | 1 RP13-1016M1.2  | --     |
| ENSG00000272789 | 5.13E-15 | -2.63127 | 1 | 1 RP11-286H15.1  | --     |
| ENSG00000272790 | 5.13E-15 | -2.63127 | 1 | 1 AP002884.3     | K10252 |
| ENSG00000272795 | 5.13E-15 | -2.63127 | 1 | 1 RP11-602N24.3  | --     |
| ENSG00000272796 | 5.13E-15 | -2.63127 | 1 | 1 RP1-74M1.3     | --     |
| ENSG00000272797 | 5.13E-15 | -2.63127 | 1 | 1 RP11-368I23.3  | --     |
| ENSG00000272798 | 5.13E-15 | -2.63127 | 1 | 1 CTA-390C10.9   | --     |
| ENSG00000272801 | 5.13E-15 | -2.63127 | 1 | 1 RP1-170O19.23  | --     |
| ENSG00000272814 | 5.13E-15 | -2.63127 | 1 | 1 RP11-15I20.1   | --     |
| ENSG00000272815 | 5.13E-15 | -2.63127 | 1 | 1 RP11-219A15.4  | --     |
| ENSG00000272823 | 5.13E-15 | -2.63127 | 1 | 1 RP11-295M18.6  | --     |
| ENSG00000272824 | 5.13E-15 | -2.63127 | 1 | 1 RP6-74O6.6     | --     |
| ENSG00000272837 | 5.13E-15 | -2.63127 | 1 | 1 OR10AE3P       | --     |
| ENSG00000272839 | 5.13E-15 | -2.63127 | 1 | 1 RP11-452C13.1  | --     |
| ENSG00000272840 | 5.13E-15 | -2.63127 | 1 | 1 RP11-379B18.6  | --     |
| ENSG00000272843 | 5.13E-15 | -2.63127 | 1 | 1 RP11-313P13.5  | --     |
| ENSG00000272846 | 5.13E-15 | -2.63127 | 1 | 1 RP11-701H24.10 | --     |
| ENSG00000272848 | 5.13E-15 | -2.63127 | 1 | 1 RP1-137D17.2   | --     |
| ENSG00000272851 | 5.13E-15 | -2.63127 | 1 | 1 RP11-801F7.1   | --     |
| ENSG00000272855 | 5.13E-15 | -2.63127 | 1 | 1 RP5-1102E8.3   | --     |
| ENSG00000272865 | 5.13E-15 | -2.63127 | 1 | 1 RP11-561I11.4  | --     |

|                 |          |          |   |                   |        |
|-----------------|----------|----------|---|-------------------|--------|
| ENSG00000272866 | 5.13E-15 | -2.63127 | 1 | 1 RP11-12D24.10   | --     |
| ENSG00000272871 | 5.13E-15 | -2.63127 | 1 | 1 RP11-408A13.4   | --     |
| ENSG00000272874 | 5.13E-15 | -2.63127 | 1 | 1 RP5-1103G7.10   | --     |
| ENSG00000272880 | 5.13E-15 | -2.63127 | 1 | 1 RP11-33M22.2    | --     |
| ENSG00000272882 | 5.13E-15 | -2.63127 | 1 | 1 OR2BH1P         | --     |
| ENSG00000272885 | 5.13E-15 | -2.63127 | 1 | 1 RP11-2H3.6      | --     |
| ENSG00000272887 | 5.13E-15 | -2.63127 | 1 | 1 CSPG4P5         | K08115 |
| ENSG00000272897 | 5.13E-15 | -2.63127 | 1 | 1 RP1-309K20.6    | K04487 |
| ENSG00000272900 | 5.13E-15 | -2.63127 | 1 | 1 OR10Q2P         | K04257 |
| ENSG00000272904 | 5.13E-15 | -2.63127 | 1 | 1 RP11-392E22.11  | --     |
| ENSG00000272908 | 5.13E-15 | -2.63127 | 1 | 1 RP11-121A8.1    | --     |
| ENSG00000272911 | 5.13E-15 | -2.63127 | 1 | 1 RP11-74E22.6    | --     |
| ENSG00000272912 | 5.13E-15 | -2.63127 | 1 | 1 RP11-724N1.1    | --     |
| ENSG00000272913 | 5.13E-15 | -2.63127 | 1 | 1 RP11-440D17.3   | --     |
| ENSG00000272917 | 5.13E-15 | -2.63127 | 1 | 1 RP11-705C15.5   | --     |
| ENSG00000272920 | 5.13E-15 | -2.63127 | 1 | 1 hsa-mir-1253    | --     |
| ENSG00000272923 | 5.13E-15 | -2.63127 | 1 | 1 RP11-391L3.1    | --     |
| ENSG00000272927 | 5.13E-15 | -2.63127 | 1 | 1 RP11-1191J2.5   | --     |
| ENSG00000272934 | 5.13E-15 | -2.63127 | 1 | 1 RP11-392E22.10  | --     |
| ENSG00000272936 | 5.13E-15 | -2.63127 | 1 | 1 RP11-700J17.2   | --     |
| ENSG00000272937 | 5.13E-15 | -2.63127 | 1 | 1 OR6U2P          | K04257 |
| ENSG00000272942 | 5.13E-15 | -2.63127 | 1 | 1 CTA-246H3.12    | --     |
| ENSG00000272944 | 5.13E-15 | -2.63127 | 1 | 1 CTD-2308L22.1   | --     |
| ENSG00000272958 | 5.13E-15 | -2.63127 | 1 | 1 CMP21-97G8.2    | --     |
| ENSG00000272962 | 5.13E-15 | -2.63127 | 1 | 1 SLC5A3          | K14383 |
| ENSG00000272966 | 5.13E-15 | -2.63127 | 1 | 1 RP11-686O6.1    | --     |
| ENSG00000272967 | 5.13E-15 | -2.63127 | 1 | 1 RP11-190C22.9   | --     |
| ENSG00000272969 | 5.13E-15 | -2.63127 | 1 | 1 RP11-528I4.2    | --     |
| ENSG00000272971 | 5.13E-15 | -2.63127 | 1 | 1 RP11-284F21.11  | --     |
| ENSG00000272980 | 5.13E-15 | -2.63127 | 1 | 1 RP11-517H2.6    | --     |
| ENSG00000272981 | 5.13E-15 | -2.63127 | 1 | 1 CTD-2234N14.2   | --     |
| ENSG00000272982 | 5.13E-15 | -2.63127 | 1 | 1 RP5-1180E21.4   | --     |
| ENSG00000272984 | 5.13E-15 | -2.63127 | 1 | 1 RP11-85E16.1    | --     |
| ENSG00000272987 | 5.13E-15 | -2.63127 | 1 | 1 OR5AL1          | K04257 |
| ENSG00000272988 | 5.13E-15 | -2.63127 | 1 | 1 RP11-150D20.5   | --     |
| ENSG00000272989 | 5.13E-15 | -2.63127 | 1 | 1 RP13-616I3.1    | --     |
| ENSG00000272991 | 5.13E-15 | -2.63127 | 1 | 1 AF129408.17     | --     |
| ENSG00000272992 | 5.13E-15 | -2.63127 | 1 | 1 RP11-809C18.4   | --     |
| ENSG00000272993 | 5.13E-15 | -2.63127 | 1 | 1 RP11-196G18.24  | --     |
| ENSG00000272995 | 5.13E-15 | -2.63127 | 1 | 1 RP11-362J17.1   | --     |
| ENSG00000273011 | 5.13E-15 | -2.63127 | 1 | 1 RP11-728K20.3   | --     |
| ENSG00000273012 | 5.13E-15 | -2.63127 | 1 | 1 RP11-90B22.1    | --     |
| ENSG00000273025 | 5.13E-15 | -2.63127 | 1 | 1 CELF6           | K13207 |
| ENSG00000273036 | 5.13E-15 | -2.63127 | 1 | 1 RP11-392E22.12  | --     |
| ENSG00000273047 | 5.13E-15 | -2.63127 | 1 | 1 RP4-583P15.14   | --     |
| ENSG00000273048 | 5.13E-15 | -2.63127 | 1 | 1 MIR4720         | --     |
| ENSG00000273049 | 5.13E-15 | -2.63127 | 1 | 1 RP11-834C11.12  | K09305 |
| ENSG00000273051 | 5.13E-15 | -2.63127 | 1 | 1 OR51F4P         | K04257 |
| ENSG00000273059 | 5.13E-15 | -2.63127 | 1 | 1 XXYac-YX155B6.7 | --     |
| ENSG00000273065 | 5.13E-15 | -2.63127 | 1 | 1 RP11-58E21.5    | --     |
| ENSG00000273068 | 5.13E-15 | -2.63127 | 1 | 1 CTA-714B7.7     | --     |
| ENSG00000273069 | 5.13E-15 | -2.63127 | 1 | 1 RP5-1186P10.2   | --     |
| ENSG00000273071 | 5.13E-15 | -2.63127 | 1 | 1 RP11-337C18.10  | --     |
| ENSG00000273077 | 5.13E-15 | -2.63127 | 1 | 1 RP11-130C6.1    | --     |
| ENSG00000273079 | 5.13E-15 | -2.63127 | 1 | 1 GRIN2B          | K05210 |
| ENSG00000273082 | 5.13E-15 | -2.63127 | 1 | 1 LL22NC03-32F9.1 | --     |
| ENSG00000273084 | 5.13E-15 | -2.63127 | 1 | 1 RP11-1275H24.3  | --     |
| ENSG00000273085 | 5.13E-15 | -2.63127 | 1 | 1 OR52E1          | K04257 |

|                 |          |          |   |                  |        |
|-----------------|----------|----------|---|------------------|--------|
| ENSG00000273087 | 5.13E-15 | -2.63127 | 1 | 1 RP11-566J3.4   | —      |
| ENSG00000273088 | 5.13E-15 | -2.63127 | 1 | 1 RP11-201K10.3  | K06568 |
| ENSG00000273098 | 5.13E-15 | -2.63127 | 1 | 1 RP11-488L1.1   | —      |
| ENSG00000273100 | 5.13E-15 | -2.63127 | 1 | 1 RP11-302L19.3  | —      |
| ENSG00000273104 | 5.13E-15 | -2.63127 | 1 | 1 CMP21-97G8.1   | —      |
| ENSG00000273106 | 5.13E-15 | -2.63127 | 1 | 1 RP11-559M23.1  | —      |
| ENSG00000273110 | 5.13E-15 | -2.63127 | 1 | 1 RP11-350G8.9   | —      |
| ENSG00000273112 | 5.13E-15 | -2.63127 | 1 | 1 RP11-25K21.6   | —      |
| ENSG00000273115 | 5.13E-15 | -2.63127 | 1 | 1 KB-1466C5.1    | —      |
| ENSG00000273118 | 5.13E-15 | -2.63127 | 1 | 1 AC079610.1     | —      |
| ENSG00000273119 | 5.13E-15 | -2.63127 | 1 | 1 RP11-128P17.4  | —      |
| ENSG00000273123 | 5.13E-15 | -2.63127 | 1 | 1 RP11-9N20.3    | —      |
| ENSG00000273124 | 5.13E-15 | -2.63127 | 1 | 1 RP11-236B18.5  | —      |
| ENSG00000273132 | 5.13E-15 | -2.63127 | 1 | 1 RP11-350J20.12 | —      |
| ENSG00000273133 | 5.13E-15 | -2.63127 | 1 | 1 RP11-799M12.2  | —      |
| ENSG00000273138 | 5.13E-15 | -2.63127 | 1 | 1 GS1-293C5.1    | —      |
| ENSG00000273141 | 5.13E-15 | -2.63127 | 1 | 1 RP11-820I16.4  | —      |
| ENSG00000273149 | 5.13E-15 | -2.63127 | 1 | 1 RP11-290D2.6   | —      |
| ENSG00000273153 | 5.13E-15 | -2.63127 | 1 | 1 RP11-406H21.2  | —      |
| ENSG00000273155 | 5.13E-15 | -2.63127 | 1 | 1 MRPL30         | K02907 |
| ENSG00000273160 | 5.13E-15 | -2.63127 | 1 | 1 RP11-104L21.3  | —      |
| ENSG00000273164 | 5.13E-15 | -2.63127 | 1 | 1 DGCR10         | —      |
| ENSG00000273165 | 5.13E-15 | -2.63127 | 1 | 1 RP11-1057B6.1  | —      |
| ENSG00000273167 | 5.13E-15 | -2.63127 | 1 | 1 RP11-307N16.6  | K05769 |
| ENSG00000273170 | 5.13E-15 | -2.63127 | 1 | 1 ANKRD18A       | K17299 |
| ENSG00000273171 | 5.13E-15 | -2.63127 | 1 | 1 CTB-96E2.2     | K06251 |
| ENSG00000273172 | 5.13E-15 | -2.63127 | 1 | 1 AC108004.2     | —      |
| ENSG00000273173 | 5.13E-15 | -2.63127 | 1 | 1 SNURF          | K11100 |
| ENSG00000273174 | 5.13E-15 | -2.63127 | 1 | 1 RP11-434H6.6   | —      |
| ENSG00000273175 | 5.13E-15 | -2.63127 | 1 | 1 RP11-11N7.4    | —      |
| ENSG00000273177 | 5.13E-15 | -2.63127 | 1 | 1 RP11-368I23.4  | —      |
| ENSG00000273179 | 5.13E-15 | -2.63127 | 1 | 1 RP11-20I20.4   | —      |
| ENSG00000273180 | 5.13E-15 | -2.63127 | 1 | 1 RP11-335L23.4  | —      |
| ENSG00000273181 | 5.13E-15 | -2.63127 | 1 | 1 RP11-778D9.13  | —      |
| ENSG00000273185 | 5.13E-15 | -2.63127 | 1 | 1 RP11-98C1.1    | —      |
| ENSG00000273189 | 5.13E-15 | -2.63127 | 1 | 1 CTD-3148I10.15 | —      |
| ENSG00000273193 | 5.13E-15 | -2.63127 | 1 | 1 RP11-523G9.3   | —      |
| ENSG00000273198 | 5.13E-15 | -2.63127 | 1 | 1 GS1-304P7.3    | —      |
| ENSG00000273199 | 5.13E-15 | -2.63127 | 1 | 1 AP000692.10    | —      |
| ENSG00000273204 | 5.13E-15 | -2.63127 | 1 | 1 RP4-549L20.3   | —      |
| ENSG00000273209 | 5.13E-15 | -2.63127 | 1 | 1 RP11-107N15.1  | —      |
| ENSG00000273211 | 5.13E-15 | -2.63127 | 1 | 1 RP13-131K19.7  | —      |
| ENSG00000273213 | 5.13E-15 | -2.63127 | 1 | 1 RP5-998N21.10  | —      |
| ENSG00000273214 | 5.13E-15 | -2.63127 | 1 | 1 RP5-1039K5.18  | —      |
| ENSG00000273217 | 5.13E-15 | -2.63127 | 1 | 1 CTC-432M15.3   | K08020 |
| ENSG00000273219 | 5.13E-15 | -2.63127 | 1 | 1 RP11-644N4.1   | —      |
| ENSG00000273221 | 5.13E-15 | -2.63127 | 1 | 1 RP5-1180E21.5  | —      |
| ENSG00000273228 | 5.13E-15 | -2.63127 | 1 | 1 OR5BQ1P        | —      |
| ENSG00000273232 | 5.13E-15 | -2.63127 | 1 | 1 RP11-370A5.2   | —      |
| ENSG00000273233 | 5.13E-15 | -2.63127 | 1 | 1 RP11-713D19.1  | —      |
| ENSG00000273234 | 5.13E-15 | -2.63127 | 1 | 1 OR2A13P        | K04257 |
| ENSG00000273238 | 5.13E-15 | -2.63127 | 1 | 1 RP11-1263C18.1 | —      |
| ENSG00000273244 | 5.13E-15 | -2.63127 | 1 | 1 KB-7G2.8       | —      |
| ENSG00000273248 | 5.13E-15 | -2.63127 | 1 | 1 RP11-399K21.13 | —      |
| ENSG00000273252 | 5.13E-15 | -2.63127 | 1 | 1 OR7E39P        | K04257 |
| ENSG00000273255 | 5.13E-15 | -2.63127 | 1 | 1 OR5BP1P        | —      |
| ENSG00000273258 | 5.13E-15 | -2.63127 | 1 | 1 RP11-394I13.3  | —      |
| ENSG00000273259 | 5.13E-15 | -2.63127 | 1 | 1 RP11-986E7.7   | K04525 |

|                 |          |          |   |                   |        |
|-----------------|----------|----------|---|-------------------|--------|
| ENSG00000273262 | 5.13E-15 | -2.63127 | 1 | 1 RP11-18I14.11   | —      |
| ENSG00000273266 | 5.13E-15 | -2.63127 | 1 | 1 HOXC4           | K09304 |
| ENSG00000273267 | 5.13E-15 | -2.63127 | 1 | 1 RP11-338K13.1   | —      |
| ENSG00000273269 | 5.13E-15 | -2.63127 | 1 | 1 RP11-761B3.1    | K02183 |
| ENSG00000273274 | 5.13E-15 | -2.63127 | 1 | 1 ZBTB8B          | K10495 |
| ENSG00000273275 | 5.13E-15 | -2.63127 | 1 | 1 RP11-474G23.2   | —      |
| ENSG00000273283 | 5.13E-15 | -2.63127 | 1 | 1 RP5-1013A22.5   | —      |
| ENSG00000273288 | 5.13E-15 | -2.63127 | 1 | 1 AC108004.5      | —      |
| ENSG00000273291 | 5.13E-15 | -2.63127 | 1 | 1 KRBOX1          | K09228 |
| ENSG00000273294 | 5.13E-15 | -2.63127 | 1 | 1 RP11-1084J3.4   | K01796 |
| ENSG00000273295 | 5.13E-15 | -2.63127 | 1 | 1 AP000350.5      | —      |
| ENSG00000273299 | 5.13E-15 | -2.63127 | 1 | 1 CTB-13L3.1      | —      |
| ENSG00000273300 | 5.13E-15 | -2.63127 | 1 | 1 AC000068.9      | —      |
| ENSG00000273302 | 5.13E-15 | -2.63127 | 1 | 1 RP11-493E12.2   | —      |
| ENSG00000273303 | 5.13E-15 | -2.63127 | 1 | 1 RP11-944L7.5    | K09229 |
| ENSG00000273305 | 5.13E-15 | -2.63127 | 1 | 1 RP11-440D17.4   | —      |
| ENSG00000273307 | 5.13E-15 | -2.63127 | 1 | 1 RP11-58E21.7    | —      |
| ENSG00000273312 | 5.13E-15 | -2.63127 | 1 | 1 RP11-425A6.5    | —      |
| ENSG00000273318 | 5.13E-15 | -2.63127 | 1 | 1 AC018755.2      | —      |
| ENSG00000273319 | 5.13E-15 | -2.63127 | 1 | 1 RP11-138A9.2    | —      |
| ENSG00000273325 | 5.13E-15 | -2.63127 | 1 | 1 RP1-90G24.11    | —      |
| ENSG00000273327 | 5.13E-15 | -2.63127 | 1 | 1 OR6L2P          | K04257 |
| ENSG00000273330 | 5.13E-15 | -2.63127 | 1 | 1 CYP4F36P        | K17729 |
| ENSG00000273333 | 5.13E-15 | -2.63127 | 1 | 1 XXbac-BPG300A18 | —      |
| ENSG00000273335 | 5.13E-15 | -2.63127 | 1 | 1 RP11-61L19.2    | —      |
| ENSG00000273336 | 5.13E-15 | -2.63127 | 1 | 1 OR7M1P          | —      |
| ENSG00000273340 | 5.13E-15 | -2.63127 | 1 | 1 MICE            | K07985 |
| ENSG00000273341 | 5.13E-15 | -2.63127 | 1 | 1 RP5-899E9.1     | —      |
| ENSG00000273342 | 5.13E-15 | -2.63127 | 1 | 1 KB-1440D3.14    | —      |
| ENSG00000273345 | 5.13E-15 | -2.63127 | 1 | 1 CTD-2410N18.4   | —      |
| ENSG00000273360 | 5.13E-15 | -2.63127 | 1 | 1 RP11-210G22.1   | —      |
| ENSG00000273362 | 5.13E-15 | -2.63127 | 1 | 1 KB-67B5.17      | —      |
| ENSG00000273363 | 5.13E-15 | -2.63127 | 1 | 1 RP11-285G1.14   | —      |
| ENSG00000273365 | 5.13E-15 | -2.63127 | 1 | 1 RP11-466F5.10   | —      |
| ENSG00000273370 | 5.13E-15 | -2.63127 | 1 | 1 RP11-268E23.2   | —      |
| ENSG00000273372 | 5.13E-15 | -2.63127 | 1 | 1 RP11-479O17.10  | —      |
| ENSG00000273375 | 5.13E-15 | -2.63127 | 1 | 1 RP11-803P9.1    | —      |
| ENSG00000273377 | 5.13E-15 | -2.63127 | 1 | 1 OR2Q1P          | K04257 |
| ENSG00000273388 | 5.13E-15 | -2.63127 | 1 | 1 RP11-401O9.4    | —      |
| ENSG00000273395 | 5.13E-15 | -2.63127 | 1 | 1 FLJ00388        | —      |
| ENSG00000273399 | 5.13E-15 | -2.63127 | 1 | 1 RP11-408A13.3   | —      |
| ENSG00000273406 | 5.13E-15 | -2.63127 | 1 | 1 RP11-114O18.1   | —      |
| ENSG00000273407 | 5.13E-15 | -2.63127 | 1 | 1 RP11-757A13.1   | —      |
| ENSG00000273408 | 5.13E-15 | -2.63127 | 1 | 1 OR5B15P         | K04257 |
| ENSG00000273409 | 5.13E-15 | -2.63127 | 1 | 1 RP11-480C22.1   | —      |
| ENSG00000273413 | 5.13E-15 | -2.63127 | 1 | 1 RP11-96C23.15   | —      |
| ENSG00000273415 | 5.13E-15 | -2.63127 | 1 | 1 RP11-702B10.2   | —      |
| ENSG00000273420 | 5.13E-15 | -2.63127 | 1 | 1 CTD-2540B15.13  | —      |
| ENSG00000273423 | 5.13E-15 | -2.63127 | 1 | 1 OR13I1P         | K04257 |
| ENSG00000273433 | 5.13E-15 | -2.63127 | 1 | 1 RP1-170O19.22   | —      |
| ENSG00000273434 | 5.13E-15 | -2.63127 | 1 | 1 OR8S21P         | —      |
| ENSG00000273439 | 5.13E-15 | -2.63127 | 1 | 1 ZNF8            | K09228 |
| ENSG00000273447 | 5.13E-15 | -2.63127 | 1 | 1 AC004067.5      | —      |
| ENSG00000273451 | 5.13E-15 | -2.63127 | 1 | 1 RP4-569M23.4    | —      |
| ENSG00000273452 | 5.13E-15 | -2.63127 | 1 | 1 AC005358.1      | —      |
| ENSG00000273455 | 5.13E-15 | -2.63127 | 1 | 1 RP11-305O4.3    | —      |
| ENSG00000273461 | 5.13E-15 | -2.63127 | 1 | 1 RP11-398A8.4    | —      |
| ENSG00000273463 | 5.13E-15 | -2.63127 | 1 | 1 AL138834.1      | K04257 |

|                 |          |          |   |                    |        |
|-----------------|----------|----------|---|--------------------|--------|
| ENSG00000273471 | 5.13E-15 | -2.63127 | 1 | 1 RP13-1039J1.4    | _      |
| ENSG00000273473 | 5.13E-15 | -2.63127 | 1 | 1 LL09NC01-139C3.1 | _      |
| ENSG00000273474 | 5.13E-15 | -2.63127 | 1 | 1 RP11-295P9.12    | _      |
| ENSG00000273477 | 5.13E-15 | -2.63127 | 1 | 1 RP11-196O16.1    | _      |
| ENSG00000273481 | 5.13E-15 | -2.63127 | 1 | 1 RP11-126K1.9     | _      |
| ENSG00000273484 | 5.13E-15 | -2.63127 | 1 | 1 OR6R2P           | K04257 |
| ENSG00000273487 | 5.13E-15 | -2.63127 | 1 | 1 RP4-621B10.8     | _      |
